# Supplementary material for: A Two-Dimensional Peptide-Centric Stability Assay Maps Multidimensional Target Landscapes Unveiling 17β-Estradiol (E2)-GPX4 Binding-Induced Ferroptosis
Source: Research Square preprint supplement (doi:10.21203/rs.3.rs-6893001/v1), 2025-07-04
Supplement: Supplementary file 1 [file 00f192300b48ab4645760bb5.xlsx]

## Sheet: parameter description
Supplementary table 12
This file summarizes global lipidomic changes following treatment with E2 in BT474 cells
Experimental Setup	Compound	Concentration [mM]	Data acquisition	Replicate	Cell Line
lipidome experiemnt, related to Figure 5E-G, S4D	E2	20	Full scan & DDA	biological replicate1	BT474
	E2	20	Full scan & DDA	biological replicate2
	E2	20	Full scan & DDA	biological replicate3
	E2	20	Full scan & DDA	biological replicate4
	DMSO	same volume as the added E2	Full scan & DDA	biological replicate1
	DMSO	same volume as the added E2	Full scan & DDA	biological replicate2
	DMSO	same volume as the added E2	Full scan & DDA	biological replicate3
	DMSO	same volume as the added E2	Full scan & DDA	biological replicate4
Column descriptions
	Mlipid(ug)	Relative lipid content after internal standard correction
	CalcMz	Mass-to-charge ratio of ions for identification, in positive ionization mode: [M+H]⁺, [M+NH4]⁺, [M+H-H2O]⁺; in negative ionization mode: [M-H]⁻, [M+CH3COO]⁻
	Grade	Classification based on identification confidence
	Mprotein(mg)	Protein dry weight in milligrams
	Mean_Mprotein (mg)	Average protein dry weight within the same experimental group
	Normalize_XXX	Relative lipid content normalized by mean dry protein weight
	Log2FC	Log2 intensity fold change of the corresponding peptide (t-test, permutation-based FDR)
	-Log10P.Value	-Log10 P.Value of the corresponding peptide (t-test, permutation-based FDR)

## Sheet: Lipidome
Mlipid (ug)	CalcMz	Grade	DMSO_bio.rep.1	DMSO_bio.rep.2	DMSO_bio.rep.3	DMSO_bio.rep.4	E2_bio.rep.1	E2_bio.rep.2	E2_bio.rep.3	E2_bio.rep.4	Normalized_DMSO_bio.rep.1	Normalized_DMSO_bio.rep.2	Normalized_DMSO_bio.rep.3	Normalized_DMSO_bio.rep.4	Normalized_E2_bio.rep.1	Normalized_E2_bio.rep.2	Normalized_E2_bio.rep.3	Normalized_E2_bio.rep.4	Log2FC	-log10P.Value
SumArea			74196521052	76870939732	81191206172	73271943508	94832185193	78146205627	102557775678	99365094176
Mprotein (mg)			2.4	2.7	2.4	2.9	1.4	1.5	1.6	2.4
Mean_Mprotein (mg)			2.6	2.6	2.6	2.6	1.72	1.72	1.72	1.72
AcCa(14_0)	372.311	A	0.0101424	0.0121953	0.0114553	0.015579	0.0140676	0.0320679	0.0242299	0.0163468	0.00390093	0.00469051	0.00440589	0.00599191	0.00817885	0.0186441	0.0140871	0.00950394	1.35034	2.3871
PG(22_5_22_6)	867.518	B	0.00183143	0.00178342	0.00198542	0.00203821	0.000495202	0.000145417	0.00030858	0.0001203	0.000704395	0.00068593	0.000763622	0.000783926	0.000287908	8.45445e-05	0.000179407	6.99416e-05	-2.4722	2.68369
TG(16_1e_18_1_22_5)	891.78	A	0.00806718	0.0304486	0.0260682	0.0225021	0.0014514	0.00498855	0.00240846	0.00547568	0.00310276	0.011711	0.0100262	0.00865464	0.000843836	0.00290032	0.00140027	0.00318353	-2.04374	1.761
PC(14_0e_18_2)	716.559	C	0.122165	0.138681	0.148432	0.117851	0.0173867	0.0658874	0.0190459	0.0132474	0.0469865	0.0533387	0.0570894	0.0453272	0.0101086	0.0383067	0.0110732	0.00770199	-1.90437	1.97575
PC(20_3e_18_1)	796.621	B	0.241172	0.224878	0.25764	0.207199	0.0520956	0.0378572	0.0475619	0.0464292	0.0927583	0.0864915	0.0990924	0.0796921	0.0302881	0.02201	0.0276523	0.0269937	-1.74808	5.21894
PE(16_0p_18_3)	698.512	B	0.214759	0.216044	0.240198	0.2193	0.053283	0.0477678	0.0445487	0.0441812	0.0825996	0.083094	0.0923839	0.0843463	0.0309785	0.027772	0.0259004	0.0256867	-1.63649	6.28819
PC(12_0_20_4)	726.507	C	0.0260896	0.0185709	0.0217825	0.0247977	0.00522268	0.00401961	0.00494226	0.00562381	0.0100345	0.00714266	0.0083779	0.00953757	0.00303644	0.00233698	0.00287341	0.00326966	-1.60616	4.39059
TG(17_0_20_3_20_4)	919.775	A	0.0567501	0.0580267	0.0657433	0.0484531	0.0253911	0.00541197	0.00663964	0.0295407	0.021827	0.022318	0.0252859	0.0186358	0.0147623	0.00314649	0.00386025	0.0171748	-1.55498	1.283
PC(18_4_16_1)	752.523	C	0.0616364	0.0528726	0.0517774	0.0526352	0.00369532	0.0200679	0.0321856	0.00958906	0.0237063	0.0203356	0.0199144	0.0202443	0.00214844	0.0116674	0.0187126	0.00557503	-1.55392	1.1983
PE(16_1e_18_3)	696.497	A	0.24516	0.262791	0.282763	0.273388	0.0664214	0.0536766	0.0613409	0.0588883	0.0942922	0.101073	0.108755	0.105149	0.0386171	0.0312073	0.0356633	0.0342374	-1.55268	5.99005
PE(18_1e_20_3)	752.56	A	1.53505	1.62057	1.75743	1.69474	0.418442	0.342649	0.372709	0.364501	0.590404	0.623297	0.675934	0.651821	0.24328	0.199215	0.216691	0.211919	-1.54672	6.12367
TG(20_4e_16_0_22_4)	917.796	A	0.0155199	0.0218995	0.0221759	0.0185986	0.00561615	0.00618356	0.00352877	0.00304173	0.00596919	0.0084229	0.00852919	0.00715331	0.0032652	0.00359509	0.00205161	0.00176845	-1.54261	2.84221
TG(18_2e_18_2_18_2)	865.764	A	0.0364719	0.0483633	0.0424935	0.0354114	0.0101354	0.00816585	0.0128602	0.00683111	0.0140277	0.0186013	0.0163436	0.0136198	0.00589267	0.00474759	0.00747684	0.00397158	-1.53189	3.32728
PC(18_0e_20_4)	854.628	B	0.149999	0.143797	0.155955	0.158668	0.0275803	0.0427025	0.0360631	0.0367881	0.0576919	0.0553067	0.0599826	0.0610263	0.016035	0.024827	0.0209669	0.0213884	-1.50793	4.51282
TG(18_1e_16_0_18_3)	858.791	B	0.0355711	0.0596989	0.0458533	0.0311737	0.0112303	0.00533281	0.0163873	0.00919473	0.0136812	0.0229611	0.0176359	0.0119899	0.00652922	0.00310047	0.00952752	0.00534578	-1.50238	2.04351
PE(16_2e_21_0)	766.572	C	0.177259	0.138407	0.167198	0.159572	0.0375826	0.0360495	0.0390835	0.0429519	0.0681766	0.0532334	0.0643068	0.0613737	0.0218503	0.020959	0.022723	0.0249721	-1.44613	5.33887
PC(16_0_18_3)	814.56	A	0.690966	0.57616	0.542023	0.61667	0.148118	0.196574	0.129243	0.129435	0.265756	0.2216	0.20847	0.237181	0.0861152	0.114287	0.0751413	0.0752532	-1.42735	3.94201
PC(16_1_16_1)	788.545	A	3.34993	3.30941	3.45357	3.72149	0.838609	0.766081	0.886475	0.941363	1.28843	1.27285	1.3283	1.43134	0.487563	0.445396	0.515392	0.547304	-1.41741	5.89281
MePC(12_1e_18_2)	722.51	C	0.141209	0.115	0.108325	0.146206	0.0265513	0.0313163	0.0350208	0.0344341	0.0543111	0.0442309	0.0416633	0.0562331	0.0154368	0.0182071	0.0203609	0.0200198	-1.4046	4.22882
PE(20_1e_20_3)	780.591	B	0	0.101263	0.119481	0.127073	0.0337999	0.0277231	0.0258243	0.0290728	0	0.0389473	0.0459542	0.0488743	0.0196511	0.0161181	0.0150141	0.0169028	-1.39855	3.96733
PI(16_1_20_4)	855.503	A	0.0523309	0.0439039	0.0519147	0.0549754	0.01871	0.0106015	0.0094604	0.0155516	0.0201273	0.0168861	0.0199672	0.0211444	0.0108779	0.00616367	0.00550023	0.00904161	-1.35685	2.86802
PE(18_0p_20_3)	754.574	B	0.822647	0.820978	0.841907	0.80234	0.224378	0.19183	0.241117	0.208124	0.316403	0.315761	0.32381	0.308592	0.130452	0.111529	0.140184	0.121003	-1.33454	5.78693
PC(16_1e_20_4)	824.581	B	0.0809294	0.0643456	0.0793155	0.0753765	0.0216348	0.0190898	0.0168257	0.021414	0.0311267	0.0247483	0.030506	0.028991	0.0125784	0.0110987	0.00978241	0.01245	-1.33111	4.64071
PC(18_0e_22_5)	880.644	B	0.0388773	0.0422044	0.0427026	0.0340647	0.0086365	0.0148949	0.00942115	0.00991228	0.0149528	0.0162325	0.0164241	0.0131018	0.00502122	0.00865981	0.00547741	0.00576295	-1.31248	3.34274
PC(12_0_18_2)	702.507	C	0.236583	0.198869	0.24954	0.205921	0.0630856	0.0643551	0.0614591	0.0580091	0.0909935	0.0764882	0.0959768	0.0792004	0.0366777	0.0374157	0.035732	0.0337262	-1.24989	5.2094
PC(18_1_20_3)	832.583	A	0.112426	0.0996256	0.0821737	0.119777	0.0302162	0.0308745	0.0297397	0.0238842	0.0432409	0.0383175	0.0316053	0.0460681	0.0175676	0.0179503	0.0172905	0.0138862	-1.24845	3.82905
PI(16_0_20_3)	859.534	A	3.12897	3.16495	3.54187	3.23874	0.996786	0.8324	0.917558	0.910296	1.20345	1.21729	1.36226	1.24567	0.579527	0.483954	0.533464	0.529242	-1.2431	5.80739
PE(10_0_11_4)	530.288	C	0.0261153	0.0138047	0.00843824	0.00970508	0.00353935	0.00547412	0.00298689	0.00327841	0.0100444	0.00530951	0.00324548	0.00373272	0.00205776	0.00318263	0.00173656	0.00190605	-1.22436	1.60434
PE(18_0e_20_4)	776.557	C	0.170208	0.167308	0.158186	0.167546	0.0465871	0.0434937	0.0502866	0.0482827	0.0654645	0.0643491	0.0608406	0.0644407	0.0270855	0.0252871	0.0292364	0.0280714	-1.21921	6.50104
PE(18_1e_20_4)	750.544	A	2.09252	1.7612	2.2739	2.08529	0.663113	0.541683	0.531003	0.602825	0.804814	0.677385	0.874577	0.802036	0.385531	0.314932	0.308723	0.35048	-1.21584	4.5498
PE(16_1e_20_3)	724.529	A	4.47066	4.78467	4.93496	4.65818	1.41524	1.2881	1.41868	1.33622	1.71948	1.84026	1.89806	1.79161	0.822814	0.748897	0.824816	0.776875	-1.19207	6.69736
PC(16_1_22_6)	804.554	C	0.0768773	0.0576719	0.0769268	0.065265	0.0243512	0.0141387	0.0248141	0.0185775	0.0295682	0.0221815	0.0295872	0.0251019	0.0141577	0.0082202	0.0144268	0.0108009	-1.18686	2.81471
PC(20_0e_16_0)	834.659	B	0.038535	0.0346741	0.0375077	0.0362897	0.0109503	0.0105542	0.00985241	0.0116622	0.0148211	0.0133362	0.014426	0.0139576	0.00636646	0.00613614	0.00572815	0.00678034	-1.1783	5.92517
PC(18_0_20_4)	868.607	A	1.23198	1.13585	1.156	1.1917	0.350171	0.33614	0.320526	0.373908	0.473839	0.436865	0.444617	0.458345	0.203588	0.19543	0.186352	0.217388	-1.17749	6.23226
PC(16_0e_18_0)	770.603	B	0.028983	0.0283736	0.0323098	0.0263949	0.00896981	0.00667411	0.0103248	0.00840245	0.0111473	0.0109129	0.0124268	0.0101519	0.005215	0.0038803	0.00600281	0.00488514	-1.17319	3.72771
PC(12_0e_23_0)	762.637	C	0.0662953	0.061971	0.068144	0.0569217	0.0135044	0.0124326	0.0306766	0.0235725	0.0254982	0.023835	0.0262092	0.021893	0.00785141	0.00722824	0.0178352	0.013705	-1.16296	1.96203
PI(17_0_20_4)	871.534	A	0.183665	0.152271	0.192461	0.190349	0.0605327	0.0469547	0.0501223	0.0551737	0.0706406	0.0585657	0.0740236	0.0732113	0.0351934	0.0272992	0.0291409	0.0320778	-1.16046	4.31516
DG(18_0_22_5)	688.587	B	0.20397	0.198986	0.174298	0.236278	0.0370019	0.0541256	0.0878717	0.0771933	0.0784499	0.0765332	0.0670377	0.090876	0.0215127	0.0314684	0.0510882	0.0448798	-1.13964	2.08381
PS(18_1_22_0)	844.607	A	0.104241	0.116836	0.112237	0.13387	0.0157691	0.0415272	0.0457188	0.0500126	0.0400927	0.0449369	0.0431682	0.0514886	0.00916809	0.0241437	0.0265807	0.0290771	-1.13722	1.55394
PE(16_0p_20_3)	726.543	B	3.88386	4.04477	3.97593	3.65095	1.25565	1.07148	1.21447	1.14557	1.49379	1.55568	1.5292	1.40421	0.730029	0.622955	0.706087	0.66603	-1.13607	5.86376
PE(20_0p_20_3)	782.606	B	0.0479998	0.0463331	0.046686	0.0557847	0.0187175	0.0109023	0.0148149	0.0159096	0.0184615	0.0178204	0.0179561	0.0214557	0.0108823	0.00633854	0.00861332	0.00924974	-1.13189	3.18874
PE(16_0p_16_1)	674.512	B	0.461626	0.523604	0.501892	0.400484	0.133373	0.126511	0.163187	0.156516	0.177548	0.201386	0.193035	0.154032	0.0775424	0.0735527	0.0948764	0.0909979	-1.10809	3.98117
PC(16_2e_18_1)	742.574	B	0.0228507	0.0216562	0.0167687	0.0229023	0.00935025	0.00635103	0.00571624	0.00508973	0.00878871	0.00832932	0.00644949	0.00880857	0.00543619	0.00369246	0.00332339	0.00295915	-1.09923	2.62511
PC(16_0e_18_2)	802.597	B	0.430825	0.491988	0.471861	0.375764	0.136896	0.118691	0.150537	0.140942	0.165702	0.189226	0.181485	0.144525	0.0795907	0.0690062	0.0875216	0.0819432	-1.096	4.17449
PC(16_0_20_3)	842.592	A	1.8904	1.91967	2.10768	2.10251	0.636184	0.624467	0.590377	0.631207	0.727077	0.738334	0.810647	0.808656	0.369874	0.363062	0.343242	0.366981	-1.0947	6.30826
PC(18_2_22_6)	830.569	C	0.0832334	0.0674476	0.0841051	0.0834137	0.0273883	0.0192086	0.0265148	0.0267452	0.0320129	0.0259414	0.0323481	0.0320822	0.0159235	0.0111678	0.0154156	0.0155496	-1.0844	3.54379
PC(16_0e_20_4)	826.597	A	0.255209	0.218029	0.237395	0.221208	0.0796651	0.0711855	0.0657564	0.0751179	0.0981574	0.0838574	0.0913059	0.0850799	0.0463169	0.0413869	0.0382305	0.0436732	-1.08009	5.03218
DG(18_2e_16_0)	601.517	C	0.159092	0.166696	0.171498	0.167379	0.0555816	0.0468815	0.052253	0.0539493	0.061189	0.0641139	0.0659608	0.0643765	0.0323149	0.0272567	0.0303796	0.0313659	-1.07774	5.79794
PE(16_0p_20_5)	722.512	B	0.361165	0.321245	0.382251	0.394533	0.11536	0.114191	0.112254	0.114709	0.13891	0.123556	0.14702	0.151743	0.0670696	0.0663899	0.065264	0.0666914	-1.07606	5.4774
PC(18_0e_16_0)	806.628	B	0.30819	0.356594	0.330302	0.274956	0.0922035	0.0997435	0.0977813	0.113109	0.118535	0.137151	0.127039	0.105752	0.0536067	0.0579904	0.0568496	0.065761	-1.05804	4.35385
PE(18_1p_20_5)	748.528	B	0.0170293	0.0140905	0.0167913	0.0219802	0.00863298	0.00360292	0.00885872	0.00338905	0.00654973	0.00541944	0.00645819	0.00845393	0.00501917	0.00209472	0.00515042	0.00197038	-1.04574	1.38147
MG(34_0)	583.566	C	0.116691	0.14718	0.165044	0.091014	0.0493306	0.0314786	0.0427261	0.042501	0.0448811	0.0566076	0.0634783	0.0350054	0.0286806	0.0183015	0.0248408	0.0247099	-1.03278	2.3469
PC(18_0_20_3)	870.623	A	0.56769	0.47132	0.565461	0.534823	0.173245	0.180661	0.155826	0.186666	0.218342	0.181277	0.217485	0.205701	0.100724	0.105035	0.0905965	0.108527	-1.02235	4.71405
PE(20_1e_20_4)	778.576	A	0.248724	0.210405	0.255013	0.258649	0.0888556	0.073715	0.0785938	0.0761378	0.095663	0.080925	0.0980818	0.0994806	0.0516602	0.0428575	0.0456941	0.0442662	-1.01903	4.52585
PI(18_0_20_3)	887.566	A	7.53381	7.58344	8.1002	8.06876	2.64717	2.46437	2.54932	2.59397	2.89762	2.91671	3.11546	3.10337	1.53905	1.43277	1.48216	1.50812	-1.0128	6.90298
PC(16_0e_20_3)	828.612	B	0.165293	0.170216	0.183618	0.147701	0.0550488	0.0397964	0.0660493	0.0631067	0.0635744	0.0654676	0.0706224	0.056808	0.0320051	0.0231375	0.0384007	0.0366899	-1.0001	2.87406
PC(19_0_20_4)	824.616	C	0.0377885	0.0326289	0.0393925	0.0391179	0.0121761	0.0100021	0.0114025	0.0165051	0.014534	0.0125496	0.0151509	0.0150453	0.00707914	0.0058152	0.00662937	0.00959597	-0.997202	3.02246
PE(16_0e_18_1)	726.541	C	0.02395	0.0410084	0.0406662	0.0225515	0.0111066	0.0100614	0.0093701	0.0105118	0.00921153	0.0157725	0.0156409	0.00867365	0.00645732	0.00584966	0.00544773	0.00611154	-0.992546	2.20505
PE(20_1e_22_6)	802.576	C	0.0657742	0.0749132	0.0642784	0.106137	0.032703	0.0229313	0.0232725	0.0245033	0.0252978	0.0288128	0.0247225	0.0408219	0.0190134	0.0133321	0.0135305	0.0142461	-0.978044	2.50338
PC(16_1_18_2)	814.56	A	2.95891	2.92556	3.16095	3.17944	1.24774	0.575359	1.2148	1.28233	1.13804	1.12522	1.21575	1.22286	0.725428	0.334511	0.706277	0.745539	-0.974293	1.87151
PE(18_0p_20_4)	752.559	B	0.79504	0.672873	0.772018	0.894642	0.292495	0.243246	0.263478	0.256043	0.305784	0.258797	0.29693	0.344093	0.170055	0.141422	0.153185	0.148862	-0.9705	4.13018
LPE(20_3)	502.294	A	0.142057	0.14658	0.133567	0.102716	0.055563	0.0375421	0.0464794	0.0391198	0.0546373	0.056377	0.0513719	0.0395063	0.0323041	0.0218268	0.0270229	0.0227441	-0.962642	2.83036
PC(16_0e_22_6)	792.59	C	0.109717	0.114414	0.113862	0.100838	0.0444513	0.0331519	0.0409957	0.033662	0.0421989	0.0440054	0.0437929	0.0387837	0.0258438	0.0192744	0.0238347	0.0195709	-0.940688	3.78536
PE(16_1e_16_1)	672.497	A	0.509689	0.558666	0.598572	0.559454	0.195026	0.1669	0.224527	0.19254	0.196034	0.214872	0.23022	0.215175	0.113387	0.0970351	0.130539	0.111942	-0.924508	4.05467
PI(18_1_20_5)	881.519	A	0.0388052	0.0303044	0.0372635	0.0400023	0.0133939	0.0122049	0.0130861	0.0125588	0.0149251	0.0116555	0.0143321	0.0153855	0.00778718	0.00709585	0.00760822	0.00730164	-0.910858	4.12657
PE(16_0e_20_4)	748.525	C	0.556874	0.542895	0.50393	0.514238	0.197211	0.19191	0.178061	0.18058	0.214182	0.208806	0.193819	0.197784	0.114658	0.111576	0.103524	0.104989	-0.90602	5.81686
PI(18_0_20_4)	885.55	A	5.7611	5.39957	5.97701	5.98012	2.20387	1.94981	1.9478	2.10296	2.21581	2.07676	2.29885	2.30005	1.28132	1.13361	1.13244	1.22265	-0.899183	5.44107
PG(22_6_22_6)	865.503	B	0.00955699	0.00887858	0.00997509	0.0132954	0.00389402	0.00349195	0.00348575	0.00383252	0.00367576	0.00341484	0.00383657	0.00511362	0.00226397	0.0020302	0.0020266	0.00222821	-0.892151	3.24622
PC(14_1e_18_1)	716.559	B	0.359976	0.312164	0.369936	0.349284	0.137812	0.0982016	0.134233	0.129645	0.138452	0.120063	0.142283	0.13434	0.0801234	0.057094	0.0780425	0.0753748	-0.890411	3.40882
DG(18_0_20_3)	664.587	A	0.379773	0.417931	0.482568	0.42305	0.152183	0.16334	0.138351	0.153278	0.146067	0.160743	0.185603	0.162711	0.0884786	0.0949651	0.0804368	0.0891153	-0.889344	4.3057
PI(17_0_20_3)	892.591	B	0.0825685	0.0715897	0.0975646	0.0934401	0.0394435	0.0243436	0.0317221	0.0290534	0.0317571	0.0275345	0.0375248	0.0359385	0.0229323	0.0141533	0.0184431	0.0168915	-0.88595	2.62391
PC(14_0_20_4)	812.545	A	0.432205	0.443665	0.515114	0.460739	0.195881	0.137153	0.181224	0.155276	0.166233	0.17064	0.198121	0.177207	0.113884	0.07974	0.105363	0.0902769	-0.88181	3.34229
PC(18_1_22_5)	892.607	A	0.270928	0.155301	0.195968	0.284427	0.110536	0.0993874	0.0460773	0	0.104203	0.0597312	0.0753724	0.109395	0.064265	0.0577833	0.0267891	0	-0.869219	1.05156
PE(16_1e_20_4)	722.513	A	6.27027	5.94433	6.9483	7.09964	2.60287	2.21739	2.30893	2.41328	2.41164	2.28628	2.67242	2.73063	1.5133	1.28918	1.3424	1.40307	-0.863213	4.47694
PE(16_2e_23_0)	794.603	C	0.123306	0.135245	0.128569	0.147802	0.0529071	0.0411205	0.0533911	0.0477674	0.0474253	0.0520172	0.0494498	0.0568468	0.0307599	0.0239072	0.0310413	0.0277718	-0.862844	3.77635
MG(34_1)	581.55	C	0.241191	0.310698	0.30903	0.22002	0.091425	0.0928124	0.116811	0.0916922	0.0927659	0.119499	0.118858	0.084623	0.0531541	0.0539607	0.0679135	0.0533094	-0.85614	2.85685
PS(18_0_16_1)	762.528	A	0.689398	0.628804	0.65168	0.691617	0.248473	0.215618	0.265419	0.248489	0.265153	0.241848	0.250646	0.266006	0.144461	0.125359	0.154313	0.14447	-0.851163	4.67494
Cer(d18_1_26_1)	734.667	B	0.00414365	0.00512724	0.00636616	0.00424441	0.00207547	0.00160524	0.00141141	0.00225524	0.00159371	0.00197201	0.00244852	0.00163247	0.00120667	0.000933281	0.000820588	0.00131119	-0.843504	2.12373
PC(16_1e_16_0)	776.581	B	0.209319	0.205476	0.191858	0.180035	0.070138	0.0741025	0.0722521	0.0732777	0.0805072	0.0790292	0.0737915	0.0692444	0.0407779	0.0430829	0.042007	0.0426033	-0.842539	5.42788
PS(18_0_20_1)	816.576	B	0.239271	0.225338	0.236783	0.243635	0.107108	0.0848196	0.0869135	0.0731327	0.0920273	0.0866685	0.0910704	0.0937059	0.0622721	0.0493137	0.0505311	0.042519	-0.841709	3.46145
PE(18_1e_22_6)	774.544	A	1.03922	0.856202	1.03567	1.147	0.412889	0.362929	0.361356	0.363763	0.3997	0.329308	0.398336	0.441155	0.240052	0.211005	0.210091	0.21149	-0.840349	3.81411
PC(18_1e_16_0)	804.612	B	0.0264613	0.0268279	0.0134146	0.0290127	0.00577145	0.00970385	0.00751926	0.012414	0.0101774	0.0103184	0.00515946	0.0111587	0.00335549	0.00564177	0.00437166	0.00721742	-0.83486	1.2571
PC(18_1e_22_5)	878.628	B	0.0238865	0.0166088	0.0146347	0.0206271	0.00694158	0.00691234	0.00694087	0	0.00918712	0.00638799	0.00562872	0.0079335	0.0040358	0.0040188	0.00403539	0	-0.828159	2.16771
PE(8_0e_12_4)	502.293	C	0.0629621	0.0493555	0.0504595	0.0498127	0.0232593	0.016823	0.0207905	0.0186093	0.0242162	0.0189829	0.0194075	0.0191587	0.0135229	0.00978083	0.0120875	0.0108193	-0.826184	3.12205
PE(16_0p_20_4)	724.528	B	5.33986	4.62327	5.33518	5.2275	2.10715	1.80499	1.91303	1.89965	2.05379	1.77818	2.05199	2.01058	1.22509	1.04941	1.11222	1.10445	-0.813522	4.67668
PC(17_1_18_2)	770.569	C	0.124823	0.0969213	0.135199	0.131876	0.0430555	0.0509105	0.0442314	0.0446797	0.0480088	0.0372774	0.0519996	0.0507214	0.0250323	0.0295991	0.025716	0.0259766	-0.81337	3.24701
PE(8_0e_12_3)	504.308	C	0.0603832	0.0523355	0.0535379	0.042758	0.0233458	0.0167266	0.0218431	0.0172606	0.0232243	0.0201291	0.0205915	0.0164454	0.0135731	0.00972475	0.0126995	0.0100352	-0.80858	2.65198
ChE(18_3)	664.603	B	0.0206515	0.0184532	0.0179332	0.0205916	0.00272624	0.00993076	0.0065166	0.0163879	0.0079429	0.00709737	0.0068974	0.00791984	0.00158502	0.0057737	0.00378872	0.00952785	-0.805153	0.71229
PI(16_0_20_4)	857.519	A	0.988709	0.873976	1.07652	1.11513	0.424826	0.348626	0.363451	0.403247	0.380273	0.336145	0.414048	0.428897	0.246992	0.20269	0.211309	0.234446	-0.79855	3.63489
PE(14_1e_20_4)	694.482	A	0.0697065	0.0553577	0.073569	0.0857094	0.0286528	0.0264895	0.0255369	0.0273717	0.0268102	0.0212914	0.0282958	0.0329651	0.0166586	0.0154009	0.014847	0.0159138	-0.783713	2.93413
PG(16_1_18_2)	743.487	B	0.0232007	0.0246672	0.0283205	0.0254228	0.0113019	0.00891103	0.0111183	0.00810648	0.00892333	0.00948737	0.0108925	0.00977798	0.00657086	0.00518083	0.00646413	0.00471307	-0.78	2.96243
LPE(20_4)	500.278	A	0.134586	0.110941	0.113957	0.100503	0.0554488	0.037317	0.0443094	0.0411434	0.0517638	0.0426696	0.0438296	0.0386549	0.0322377	0.0216959	0.0257613	0.0239206	-0.779521	2.69791
Cer(d18_1_25_0)	722.667	A	0.0037598	0.0038453	0.00395815	0.00364595	0.00145465	0.00160701	0.00128794	0.00153924	0.00144608	0.00147896	0.00152236	0.00140229	0.000845726	0.000934309	0.000748803	0.000894905	-0.777032	4.37051
PG(18_2_22_6)	817.503	B	0.0101655	0.00874389	0.0135924	0.0142912	0.00527813	0.00375317	0.00460571	0.00431005	0.00390981	0.00336303	0.00522784	0.00549662	0.00306868	0.00218208	0.00267774	0.00250584	-0.767998	2.08837
LPC(18_2)	578.346	A	0.014286	0.0134884	0.0169754	0.0130116	0.00613122	0.00420533	0.00589269	0.00640711	0.00549462	0.00518785	0.00652901	0.00500445	0.00356466	0.00244496	0.00342599	0.00372507	-0.766467	2.48303
PE(20_0p_20_4)	780.59	B	0.0954293	0.0797481	0.0967195	0.100125	0.0381501	0.0395843	0.032089	0.0375205	0.0367036	0.0306723	0.0371998	0.0385095	0.0221803	0.0230141	0.0186564	0.0218142	-0.739158	3.51633
LPC(30_0)	714.541	B	0.022669	0.0207363	0.0237206	0.0212354	0.00803436	0.00678384	0.00943685	0.0116034	0.00871883	0.00797548	0.00912331	0.00816748	0.00467114	0.00394409	0.00548654	0.00674614	-0.731432	2.28199
PC(18_0_22_6)	892.607	A	0.428055	0.331163	0.418929	0.453313	0.189506	0.172692	0.131905	0.161663	0.164637	0.127371	0.161127	0.174351	0.110178	0.100403	0.0766887	0.0939904	-0.7213	2.5384
PC(18_0e_22_1)	830.7	C	0.049951	0.0460919	0.0505711	0.0491505	0.0240249	0.0165344	0.0193729	0.0201618	0.0192119	0.0177276	0.0194504	0.018904	0.013968	0.00961305	0.0112633	0.011722	-0.705115	3.07228
TG(18_3e_18_1_22_5)	915.78	A	0.0167725	0.0139841	0.00783794	0.00779717	0	0.00518523	0.00413869	0.00424654	0.00645096	0.00537848	0.00301459	0.00299891	0	0.00301467	0.00240622	0.00246892	-0.685731	0.974758
PC(20_1_22_6)	860.616	C	0.0944054	0.0723171	0.148522	0.158906	0.0563014	0.0382737	0.0459083	0.0470432	0.0363098	0.0278143	0.057124	0.0611179	0.0327334	0.0222521	0.0266909	0.0273507	-0.682311	1.22787
PC(14_1e_18_0)	718.574	B	0.444777	0.507698	0.498944	0.423204	0.207567	0.161667	0.216729	0.199056	0.171068	0.195268	0.191902	0.162771	0.120679	0.0939925	0.126006	0.11573	-0.6643	2.96251
LPC(32_0)	742.572	B	0.0418701	0.0430513	0.0421065	0.0325703	0.0164873	0.0156695	0.0183723	0.0166054	0.0161039	0.0165582	0.0161948	0.012527	0.00958564	0.00911017	0.0106816	0.00965433	-0.646665	3.04348
LPC(36_1)	796.619	B	0.0284569	0.0381866	0.0408682	0.0315404	0.0157716	0.0124982	0.0147642	0.0153496	0.010945	0.0146872	0.0157185	0.0121309	0.00916955	0.00726639	0.00858386	0.00892421	-0.646564	2.40667
PE(18_0p_22_6)	776.559	B	0.447882	0.380138	0.440378	0.474072	0.203922	0.165089	0.179702	0.192493	0.172262	0.146207	0.169376	0.182335	0.118559	0.0959821	0.104478	0.111914	-0.63685	3.28545
PC(20_1e_18_2)	798.637	C	0.127738	0.132643	0.146348	0.116727	0.055296	0.0473378	0.064915	0.0583727	0.0491302	0.0510164	0.0562876	0.044895	0.0321488	0.027522	0.0377413	0.0339376	-0.620641	2.74933
PC(16_0_20_5)	802.536	A	0.0287188	0.0246084	0.0255801	0.0291088	0.012412	0.0133589	0.0127714	0.00878621	0.0110457	0.00946476	0.00983851	0.0111957	0.00721629	0.00776679	0.00742522	0.00510826	-0.60936	2.16309
PC(16_0e_16_0)	778.597	B	0.648247	0.755894	0.693398	0.563211	0.301883	0.263762	0.294352	0.292579	0.249326	0.290728	0.266692	0.21662	0.175514	0.15335	0.171135	0.170104	-0.60452	3.04659
PC(18_2e_18_0)	772.621	B	0.0382287	0.0329395	0.0345763	0.0295573	0.0120046	0.0132208	0.0185234	0.0158662	0.0147033	0.0126691	0.0132986	0.0113682	0.00697941	0.0076865	0.0107694	0.00922455	-0.600414	2.03466
PC(16_0e_24_2)	828.684	C	0.044913	0.0494862	0.0503251	0.0406619	0.0230747	0.0175906	0.022611	0.0181293	0.0172742	0.0190331	0.0193558	0.0156392	0.0134155	0.0102271	0.013146	0.0105403	-0.597058	2.50877
PE(16_1e_20_5)	720.497	A	0.375683	0.337719	0.372953	0.396578	0.176252	0.162224	0.15731	0.153892	0.144494	0.129892	0.143444	0.15253	0.102472	0.0943164	0.0914592	0.0894723	-0.594093	4.0314
PC(12_0e_18_1)	690.543	C	0.0615039	0.0776404	0.069558	0.0590396	0.0303614	0.0247599	0.0342947	0.0292091	0.0236554	0.0298617	0.0267531	0.0227075	0.017652	0.0143953	0.0199388	0.016982	-0.579581	2.33495
FA 20_3	305.249	D	0.326793	0.301687	0.348093	0.214193	0.150951	0.106843	0.132944	0.134691	0.125689	0.116033	0.133882	0.0823818	0.0877625	0.0621181	0.0772928	0.0783086	-0.571339	1.64409
PC(16_1e_16_1)	774.565	B	0.245953	0.223377	0.396481	0.33631	0.0883701	0.179893	0.188746	0.0981833	0.0945974	0.0859142	0.152493	0.12935	0.051378	0.104589	0.109736	0.0570833	-0.562933	0.812446
PE(18_1e_17_1)	738.541	C	0.195408	0.168158	0.205	0.208536	0.095842	0.0809133	0.0898745	0.0848048	0.0751569	0.0646762	0.0788463	0.080206	0.0557221	0.0470426	0.0522526	0.0493051	-0.546609	3.09029
DG(18_3e_18_0)	627.532	C	0.33176	0.295778	0.34479	0.334973	0.155503	0.14709	0.138915	0.150313	0.1276	0.113761	0.132612	0.128836	0.0904086	0.0855177	0.0807648	0.0873913	-0.546046	4.0275
PC(18_0e_24_2)	856.715	C	0.0325009	0.0298359	0.032994	0.0312631	0.0162095	0.011123	0.0155601	0.0151554	0.0125003	0.0114754	0.01269	0.0120243	0.00942412	0.00646684	0.00904654	0.00881129	-0.542932	2.25583
PE(17_0_20_3)	754.539	A	0.363126	0.524671	0.587052	0.596507	0.233059	0.222862	0.239157	0.229212	0.139664	0.201797	0.225789	0.229426	0.135499	0.129571	0.139045	0.133263	-0.541503	1.74116
PC(18_0_20_5)	866.592	A	1.08531	1.10816	0.999475	1.01135	0.480581	0.549401	0.422993	0.465764	0.417428	0.426214	0.384414	0.388979	0.279407	0.319419	0.245926	0.270793	-0.540556	3.11619
MG(32_0)	555.535	C	0.272379	0.429356	0.323116	0.232981	0.142565	0.141284	0.14915	0.126387	0.104761	0.165137	0.124275	0.0896082	0.0828866	0.0821417	0.0867148	0.073481	-0.537704	1.47775
PE(20_2e_22_6)	800.56	C	0.0299193	0.0203417	0.0283545	0.0327773	0.0153602	0.0105872	0.010888	0.0139865	0.0115074	0.00782375	0.0109056	0.0126066	0.00893037	0.00615535	0.00633022	0.00813168	-0.532273	1.4238
TG(20_3e_18_0_22_5)	945.827	A	0.0110017	0.00877527	0.00887415	0.00634202	0.00448022	0.00401308	0.00268898	0.00492636	0.00423144	0.0033751	0.00341313	0.00243924	0.00260478	0.00233319	0.00156336	0.00286416	-0.531846	1.09832
PI(17_0_22_3)	901.581	A	0.460099	0.418649	0.449458	0.469346	0.218548	0.19991	0.200189	0.207334	0.176961	0.161019	0.172868	0.180518	0.127063	0.116227	0.116389	0.120543	-0.525373	4.51741
PC(16_2e_17_0)	730.574	C	0.0278109	0.0258428	0.0266431	0.0330266	0.0158386	0.0146923	0.00641264	0.0199516	0.0106965	0.00993954	0.0102474	0.0127026	0.00920846	0.00854205	0.00372828	0.0115998	-0.506099	0.665497
PC(18_1_20_4)	830.567	A	0.0753076	0.0569591	0.0647599	0.0784845	0.0323874	0.0360346	0.0312427	0.0282603	0.0289644	0.0219073	0.0249077	0.0301863	0.0188299	0.0209504	0.0181643	0.0164304	-0.504677	2.11515
PE(20_1e_22_5)	804.591	A	0.106352	0.0843649	0.102235	0.114479	0.0558652	0.0451837	0.0439342	0.0454997	0.0409044	0.032448	0.0393213	0.0440305	0.0324798	0.0262696	0.0255431	0.0264533	-0.498721	2.17015
Cer(d20_1_24_0)	736.682	A	0.0321495	0.0323053	0.0321567	0.028251	0.0151908	0.0131501	0.0145915	0.0159435	0.0123652	0.0124251	0.0123679	0.0108658	0.00883183	0.00764541	0.00848345	0.00926951	-0.4898	3.19009
PI(18_1_20_4)	883.534	A	0.645406	0.553274	0.846936	0.929992	0.412578	0.334116	0.296322	0.35401	0.248233	0.212798	0.325745	0.357689	0.239871	0.194254	0.17228	0.20582	-0.474322	1.26021
PC(18_1_22_6)	832.585	C	0.98103	0.816566	0.980656	1.00205	0.477405	0.394213	0.471679	0.457946	0.377319	0.314064	0.377175	0.385404	0.277561	0.229194	0.274232	0.266248	-0.472727	2.62134
PG(18_1_22_5)	821.534	B	0.060121	0.0599129	0.07144	0.0628053	0.0294569	0.0257874	0.0345938	0.0322092	0.0231235	0.0230434	0.0274769	0.0241559	0.0171261	0.0149926	0.0201127	0.0187263	-0.467673	2.28915
PE(12_1e_23_0)	740.557	C	0.487118	0.508467	0.550186	0.493318	0.252987	0.224764	0.260342	0.238721	0.187353	0.195564	0.21161	0.189738	0.147085	0.130677	0.151361	0.138791	-0.466312	3.56893
LPC(28_1)	662.512	B	0.023729	0.0210356	0.0263136	0.0248858	0.0124351	0.00964762	0.0110373	0.0132158	0.00912655	0.00809062	0.0101206	0.00957148	0.00722972	0.00560908	0.00641703	0.00768359	-0.459724	2.03777
PC(15_0_20_3)	828.576	A	0.281291	0.252059	0.27383	0.273427	0.111033	0.120816	0.145648	0.149174	0.108189	0.0969459	0.105319	0.105164	0.0645541	0.0702418	0.084679	0.0867292	-0.450642	2.20982
PS(18_0_22_3)	840.576	A	0.390787	0.432734	0.486259	0.463962	0.217593	0.194667	0.224824	0.225673	0.150303	0.166436	0.187023	0.178447	0.126507	0.113179	0.130711	0.131205	-0.441378	2.69884
PC(16_1e_18_0)	768.588	B	0.223422	0.260096	0.236151	0.200096	0.104988	0.101592	0.128772	0.115856	0.0859316	0.100037	0.0908271	0.0769601	0.0610394	0.0590649	0.0748674	0.0673582	-0.431162	2.10079
PC(18_0e_18_2)	772.621	C	0.589727	0.720557	0.689725	0.574079	0.339385	0.250989	0.357813	0.323988	0.226818	0.277137	0.265279	0.220799	0.197317	0.145924	0.208031	0.188365	-0.426582	1.65083
PC(16_2e_19_0)	758.606	C	0.0469436	0.0563594	0.0530701	0.0443425	0.0238622	0.0188683	0.0307326	0.0266871	0.0180552	0.0216767	0.0204116	0.0170548	0.0138734	0.0109699	0.0178678	0.0155158	-0.42279	1.33751
PI(18_1_20_3)	909.546	B	0.181457	0.14773	0.179881	0.186432	0.100824	0.0898601	0.0667431	0.0887245	0.069791	0.0568191	0.0691851	0.0717044	0.0586187	0.0522443	0.0388041	0.051584	-0.420544	1.52754
PC(15_0_18_2)	744.554	C	1.63282	1.52437	1.73971	1.68674	0.851057	0.712811	0.924208	0.794568	0.628007	0.586296	0.66912	0.648746	0.4948	0.414425	0.53733	0.461958	-0.4127	2.44493
dMePE(20_1e_22_6)	830.607	C	0.00904926	0.00656852	0.00903016	0.00893481	0.00481202	0.00378164	0.00385155	0.0042345	0.00348049	0.00252636	0.00347314	0.00343647	0.00279769	0.00219863	0.00223927	0.00246192	-0.407465	1.58215
PC(8_1e_21_0)	676.528	C	0.120903	0.0949913	0.120607	0.119014	0.0609954	0.0451094	0.066513	0.0561873	0.0465011	0.0365351	0.0463873	0.0457747	0.0354624	0.0262264	0.0386703	0.032667	-0.404613	1.47776
PE(18_0_17_0)	756.551	A	0.503469	0.342278	0.530407	0.339908	0.21888	0.21266	0.212155	0.197172	0.193642	0.131646	0.204003	0.130734	0.127256	0.123639	0.123346	0.114635	-0.40291	1.20252
PC(18_3e_15_0)	728.559	C	0.00935156	0.00872101	0.00515275	0.00836173	0.00182549	0.00261212	0.00605333	0.00763081	0.00359675	0.00335424	0.00198183	0.00321605	0.00106133	0.00151868	0.00351938	0.00443652	-0.402841	0.324543
PC(12_1e_23_0)	760.621	C	0.14488	0.155012	0.163351	0.140461	0.0749886	0.0631226	0.0821736	0.083473	0.0557229	0.0596198	0.0628272	0.0540233	0.043598	0.0366992	0.0477753	0.0485308	-0.400964	2.06306
PC(18_1_22_4)	894.623	A	0.54444	0.485824	0.565845	0.579722	0.263049	0.285403	0.251532	0.29463	0.2094	0.186855	0.217633	0.22297	0.152935	0.165932	0.14624	0.171297	-0.394646	2.66232
PC(18_1e_18_1)	830.628	B	0.53776	0.621749	0.557249	0.480013	0.283511	0.245269	0.285118	0.291835	0.206831	0.239134	0.214326	0.18462	0.164832	0.142598	0.165766	0.169671	-0.39145	2.18964
PE(18_1e_16_0)	702.544	A	0.138803	0.159983	0.159816	0.135868	0.0843739	0.063107	0.0800901	0.0746589	0.0533856	0.0615318	0.0614676	0.0522569	0.0490546	0.0366901	0.046564	0.0434064	-0.384082	1.86627
DG(16_0_22_5)	660.556	A	0.0693865	0.0561421	0.0627384	0.0733268	0.0355457	0.0317112	0.0301807	0.0347934	0.0266871	0.0215931	0.0241301	0.0282026	0.0206661	0.0184368	0.0175469	0.0202287	-0.383975	2.03876
PE(18_2e_16_1)	698.513	A	1.01183	1.15392	1.20153	1.10932	0.571705	0.526317	0.598799	0.57407	0.389164	0.443814	0.462125	0.42666	0.332387	0.305998	0.348139	0.333762	-0.381708	2.93981
PE(16_0p_22_6)	748.528	B	2.6429	2.11447	2.36458	2.38878	1.28147	1.15525	1.27355	1.20095	1.0165	0.813256	0.909452	0.918761	0.745041	0.671657	0.740434	0.698228	-0.354205	2.49173
PS(18_0_19_0)	828.572	B	0.0644229	0.0516635	0.0529561	0.0582473	0.0255723	0.0298471	0.036	0.0268326	0.024778	0.0198706	0.0203677	0.0224028	0.0148676	0.017353	0.0209303	0.0156004	-0.353783	1.44603
Hex1Cer(d18_1_26_0	914.73	C	0.0394764	0.0371862	0.0408588	0.0386797	0.0217999	0.0191658	0.0195221	0.0210604	0.0151832	0.0143024	0.0157149	0.0148768	0.0126744	0.0111429	0.0113501	0.0122444	-0.342769	3.21075
SM(d20_0_24_1)	843.731	C	0.0882303	0.0874068	0.0964906	0.0868103	0.0530702	0.0407853	0.0459699	0.0501432	0.0339347	0.033618	0.0371118	0.0333886	0.0308547	0.0237124	0.0267267	0.029153	-0.327542	1.96347
PC(18_0e_18_1)	832.644	B	0.37884	0.441883	0.417636	0.331475	0.214619	0.179107	0.225849	0.209075	0.145708	0.169955	0.160629	0.12749	0.124779	0.104132	0.131307	0.121555	-0.322501	1.496
PE(18_2e_22_6)	772.529	A	0.453221	0.377223	0.47205	0.505651	0.252316	0.219455	0.234929	0.245772	0.174316	0.145086	0.181558	0.194481	0.146695	0.12759	0.136587	0.14289	-0.3224	1.73472
PC(16_0e_22_5)	852.612	B	0.0484751	0.0464949	0.0570352	0.0436212	0.0260988	0.0222208	0.0253146	0.0308965	0.0186443	0.0178827	0.0219366	0.0167774	0.0151737	0.0129191	0.0147178	0.0179631	-0.310869	1.29062
ChE(20_3)	692.634	B	0.0181056	0.0249682	0.0239348	0.0233585	0.00537828	0.0197287	0	0.0162311	0.00696367	0.00960315	0.0092057	0.00898405	0.0031269	0.0114701	0	0.00943667	-0.307371	0.245246
ChE(22_5)	716.634	B	0.0441892	0.0375328	0.0559231	0.0510069	0.0154603	0.0294442	0.0226775	0.0376615	0.0169958	0.0144357	0.0215089	0.019618	0.00898855	0.0171187	0.0131846	0.0218962	-0.305166	0.45416
PE(16_1e_22_6)	746.513	A	2.68991	2.36562	2.77142	3.06286	1.50762	1.45287	1.41863	1.45319	1.03458	0.909855	1.06593	1.17802	0.876524	0.844692	0.824785	0.844878	-0.298993	2.04168
PC(20_0e_18_1)	802.668	C	0.0799419	0.0737906	0.0647621	0.0776858	0.0398405	0.0342305	0.0468152	0.0395163	0.0307469	0.028381	0.0249085	0.0298791	0.0231631	0.0199015	0.0272181	0.0229746	-0.292958	1.37032
Hex1Cer(d20_1_24_0	856.724	A	0.0946865	0.0866321	0.0980346	0.09308	0.0535564	0.0453569	0.0513165	0.0513273	0.0364179	0.03332	0.0377056	0.0358	0.0311375	0.0263703	0.0298352	0.0298415	-0.290969	2.40981
SM(d20_1_24_1)	863.698	B	0.072491	0.0725341	0.0810141	0.0718812	0.0425957	0.034028	0.044034	0.0412581	0.0278812	0.0278977	0.0311593	0.0276466	0.024765	0.0197837	0.0256012	0.0239873	-0.288777	1.67848
MePC(16_1_14_0)	735.565	C	0.571231	0.506009	0.621958	0.616568	0.323539	0.259424	0.333083	0.342475	0.219704	0.194619	0.239215	0.237142	0.188104	0.150828	0.193653	0.199113	-0.287193	1.33627
PC(20_0_20_4)	838.632	C	0.890941	0.861482	0.948485	0.910993	0.524307	0.419447	0.530063	0.496156	0.34267	0.331339	0.364802	0.350382	0.30483	0.243864	0.308176	0.288463	-0.283737	1.84295
PC(16_0_20_4)	840.576	A	1.91287	1.56989	1.62578	1.79029	0.984117	0.949697	0.807946	1.02165	0.735719	0.603804	0.625298	0.688572	0.572161	0.552149	0.469736	0.593984	-0.279408	1.52003
DG(16_0_20_3)	636.556	A	1.30289	1.31568	1.47024	1.4621	0.739491	0.731832	0.792361	0.759852	0.50111	0.50603	0.565478	0.562345	0.429936	0.425484	0.460675	0.441774	-0.278748	2.69047
PC(18_0_22_5)	858.598	A	0.0189598	0.0144219	0.0118872	0.0216718	0.0051499	0.00600977	0.0308894	0.00654955	0.00729222	0.00554687	0.00457201	0.00833531	0.00299413	0.00349405	0.0179589	0.00380788	-0.27686	0.169136
PC(20_1_20_4)	836.616	C	0.99122	0.884656	1.05325	1.02094	0.568715	0.480346	0.579135	0.531071	0.381239	0.340252	0.405094	0.392669	0.330648	0.279271	0.336706	0.308762	-0.27598	1.81769
DG(20_4e_16_0)	625.517	C	0.093877	0.076507	0.0906793	0.0958772	0.0517124	0.0435245	0.0485553	0.0515279	0.0361065	0.0294258	0.0348767	0.0368758	0.0300653	0.0253049	0.0282298	0.0299581	-0.271649	1.55619
PE(15_0_20_3)	726.508	A	0.0846052	0.088141	0.0982073	0.102345	0.0549108	0.0525368	0.0495109	0.0476693	0.0325405	0.0339004	0.037772	0.0393636	0.0319249	0.0305446	0.0287854	0.0277147	-0.269032	1.84796
PC(16_1e_17_0)	732.59	B	0.0558906	0.046471	0.06045	0.0591126	0.0331149	0.0233517	0.0345728	0.0315824	0.0214964	0.0178735	0.02325	0.0227356	0.0192528	0.0135766	0.0201005	0.0183618	-0.268492	0.876563
SM(d19_0_24_1)	829.716	C	0.0498724	0.044052	0.0516487	0.0506791	0.0291239	0.0230513	0.0281455	0.0280944	0.0191817	0.0169431	0.0198649	0.0194919	0.0169325	0.0134019	0.0163637	0.0163339	-0.26323	1.52828
dMePE(20_2e_22_6)	828.591	C	0.0134488	0.00994226	0.0130243	0.0117672	0.00804224	0.00617	0.00581903	0.00675378	0.00517262	0.00382395	0.00500933	0.00452584	0.00467572	0.00358721	0.00338315	0.00392662	-0.252264	0.904374
DG(18_1_22_5)	686.572	B	0.0259554	0.0333868	0.0480869	0.101333	0.0344867	0.0322526	0.0277032	0.0131277	0.00998283	0.0128411	0.018495	0.0389742	0.0200504	0.0187515	0.0161065	0.00763239	-0.249862	0.182568
Hex1Cer(d20_1_23_0	842.708	A	0.0350702	0.0328834	0.0353148	0.0322305	0.0205113	0.0179416	0.0183756	0.0193887	0.0134885	0.0126475	0.0135826	0.0123964	0.0119252	0.0104311	0.0106835	0.0112725	-0.23479	2.30726
Hex1Cer(m22_0_20_1)	854.709	B	0.0130083	0.0124432	0.013141	0.0129509	0.00768251	0.00660263	0.00717088	0.00766179	0.00500321	0.00478585	0.00505421	0.0049811	0.00446658	0.00383874	0.00416912	0.00445453	-0.230191	2.26519
SM(d20_0_24_2)	841.716	C	0.262234	0.25577	0.29421	0.280922	0.159142	0.131041	0.169302	0.158946	0.100859	0.098373	0.113158	0.108047	0.0925242	0.0761864	0.0984313	0.0924103	-0.229962	1.32308
PC(10_1e_23_0)	732.59	C	0.33921	0.419115	0.391531	0.315319	0.202791	0.173116	0.236664	0.221676	0.130465	0.161198	0.150589	0.121277	0.117902	0.100649	0.137595	0.128882	-0.217006	0.795173
MePC(16_0e_24_2)	859.726	C	0.0166095	0.0166887	0.0196179	0.0179412	0.0103024	0.00749831	0.0110311	0.0120735	0.00638826	0.00641872	0.00754536	0.00690048	0.00598978	0.00435948	0.00641342	0.00701949	-0.215219	0.645247
PE(20_0p_22_4)	808.621	B	0.0294193	0.0278945	0.026737	0.0268185	0.0169024	0.0122674	0.0169959	0.0179784	0.0113151	0.0107287	0.0102835	0.0103148	0.00982698	0.00713222	0.00988136	0.0104526	-0.207721	0.797263
PE(15_0_20_4)	724.492	B	0.0360731	0.0324292	0.0359377	0.0380526	0.0204912	0.0217316	0.0203639	0.0194005	0.0138743	0.0124728	0.0138222	0.0146356	0.0119135	0.0126347	0.0118395	0.0112794	-0.200097	1.84261
PE(20_0p_22_5)	806.606	B	0.0761619	0.0512153	0.0640271	0.0752689	0.0457555	0.0307536	0.0370371	0.0398383	0.0292931	0.0196982	0.0246258	0.0289496	0.026602	0.01788	0.0215332	0.0231618	-0.198535	0.508174
PI(20_2_20_3)	911.566	A	0.116729	0.107916	0.117689	0.135583	0.0712139	0.0629647	0.0721494	0.0690553	0.0448957	0.0415063	0.045265	0.0521472	0.0414034	0.0366074	0.0419473	0.0401485	-0.196271	1.2765
ChE(0_0)	369.352	C	0.222663	0.199187	0.278038	0.201853	0.149746	0.105341	0.126352	0.139801	0.0856397	0.0766103	0.106938	0.0776359	0.0870619	0.0612446	0.0734603	0.0812796	-0.19369	0.580811
Cer(d20_1_24_0	692.656	C	0.00293203	0.00277395	0.00318505	0.00276117	0.0015882	0.00157261	0.00179298	0.00178912	0.0011277	0.0010669	0.00122502	0.00106199	0.000923373	0.000914308	0.00104243	0.00104018	-0.193464	1.46572
PE(18_0p_16_0)	704.559	B	0.0685898	0.07069	0.0670655	0.0595971	0.0407407	0.0304577	0.0436609	0.0415378	0.0263807	0.0271885	0.0257944	0.0229219	0.0236864	0.017708	0.0253843	0.0241499	-0.180465	0.673466
PE(18_0p_20_5)	750.543	B	0.13678	0.117811	0.126803	0.158799	0.0959481	0.0700151	0.0795979	0.0709383	0.0526075	0.0453121	0.0487703	0.0610765	0.0557838	0.0407064	0.0462778	0.0412432	-0.178051	0.602181
MePC(12_0e_20_4)	748.525	C	1.14343	0.944564	1.08795	1.16946	0.636292	0.571041	0.656157	0.677568	0.43978	0.363294	0.418441	0.449794	0.369937	0.332	0.381487	0.393935	-0.176037	1.0416
PC(16_0e_18_1)	804.612	A	2.08131	2.36278	2.1914	1.79356	1.2291	1.11281	1.29939	1.28237	0.800503	0.908763	0.842845	0.689832	0.714591	0.64698	0.755456	0.745564	-0.174951	0.904267
PE(18_1p_22_6)	774.543	B	0.209648	0.171352	0.204384	0.2275	0.126338	0.106054	0.123708	0.119029	0.080634	0.0659047	0.0786092	0.0874999	0.0734524	0.0616592	0.0719235	0.069203	-0.174331	0.850561
TG(20_4e_18_1_18_1)	893.796	A	0.0426381	0.0542296	0.0469425	0.0340993	0.0257804	0.0219173	0.0298501	0.0260489	0.0163993	0.0208575	0.0180548	0.0131151	0.0149886	0.0127426	0.0173547	0.0151447	-0.172536	0.465087
PS(18_0_20_2)	814.56	A	0.997775	0.975074	1.05696	0.987805	0.64782	0.563196	0.540885	0.613326	0.38376	0.375028	0.406521	0.379925	0.37664	0.327439	0.314468	0.356585	-0.171169	1.42939
PS(18_1_18_2)	784.513	A	0.257313	0.26552	0.283368	0.296795	0.180768	0.147697	0.149189	0.173972	0.0989664	0.102123	0.108988	0.114152	0.105098	0.0858705	0.0867379	0.101147	-0.166821	0.969703
PE(18_1p_16_1)	700.528	B	0.503552	0.538699	0.528046	0.500244	0.310567	0.277238	0.334454	0.30156	0.193674	0.207192	0.203095	0.192402	0.180562	0.161185	0.19445	0.175326	-0.165055	1.43354
PA(16_1_18_1)	671.466	A	0.0821789	0.0857761	0.106044	0.0971856	0.0455853	0.0547767	0.0586457	0.0603356	0.0316073	0.0329908	0.0407863	0.0373791	0.0265031	0.0318469	0.0340963	0.0350788	-0.163776	0.630355
MePC(14_1e_18_2)	750.541	C	0.126598	0.132713	0.140099	0.131619	0.0880729	0.0698662	0.0741832	0.083711	0.0486914	0.0510433	0.0538841	0.0506225	0.0512052	0.0406199	0.0431298	0.0486692	-0.158714	0.986533
PE(18_1e_17_0)	716.56	A	0.0664695	0.0621222	0.0813555	0.0687095	0.0412857	0.0390325	0.0421625	0.0420236	0.0255652	0.0238932	0.0312906	0.0264267	0.0240033	0.0226933	0.0245131	0.0244323	-0.157666	0.925183
LPC(16_0e)	482.361	B	0.0213586	0.0228439	0.0226965	0.0168949	0.0127651	0.00932275	0.013166	0.014811	0.00821483	0.00878612	0.00872941	0.00649805	0.00742156	0.0054202	0.00765466	0.00861107	-0.156687	0.391051
PC(16_0e_16_1)	776.581	B	2.61007	3.08819	2.94683	2.29241	1.57031	1.48535	1.72358	1.70274	1.00387	1.18777	1.1334	0.881696	0.912972	0.863578	1.00208	0.989966	-0.151835	0.672759
LPE(22_6)	524.278	B	0.0545882	0.0446856	0.0464461	0.0410996	0.0343545	0.0235299	0.02848	0.0256795	0.0209955	0.0171868	0.0178639	0.0158075	0.0199736	0.0136802	0.0165582	0.01493	-0.148275	0.459145
SM(d19_0_24_2)	827.7	C	0.0886425	0.0834676	0.104028	0.0969779	0.0567548	0.04839	0.0603462	0.0583911	0.0340933	0.0321029	0.0400108	0.0372992	0.032997	0.0281337	0.035085	0.0339483	-0.140724	0.683939
SM(t18_1_23_0)	817.679	C	0.0184448	0.0181282	0.0219406	0.0187424	0.0141216	0.00967783	0.0124001	0.0105314	0.00709417	0.00697239	0.00843871	0.00720863	0.00821021	0.00562665	0.00720936	0.00612289	-0.140314	0.461093
PC(20_0e_18_2)	800.653	C	0.0723242	0.087396	0.084662	0.0626762	0.0521064	0.0358361	0.0553106	0.042405	0.027817	0.0336139	0.0325623	0.0241062	0.0302944	0.020835	0.0321573	0.0246541	-0.138149	0.323748
PS(18_0_18_1)	788.545	A	7.04516	6.41408	6.96465	7.16635	4.34334	3.97067	4.28654	4.15474	2.70968	2.46695	2.67871	2.75629	2.5252	2.30853	2.49217	2.41555	-0.122997	1.44321
SM(d19_0_24_3)	825.684	C	0.00682749	0.00377086	0.00465817	0.00574371	0.00344815	0.00212405	0.00310207	0.00419912	0.00262596	0.00145033	0.00179161	0.00220912	0.00200474	0.00123491	0.00180353	0.00244135	-0.116907	0.162137
ChE(18_2)	666.618	B	0.0145797	0.0118109	0.0132575	0.0194393	0.00694287	0.0123921	0.00658128	0.0109285	0.00560757	0.00454267	0.00509904	0.00747666	0.00403655	0.00720469	0.00382633	0.00635377	-0.114476	0.159164
ChE(20_5)	688.603	B	0.0146013	0.0125265	0.0222171	0.0181342	0.00878234	0.00779812	0.00989595	0.0152101	0.0056159	0.00481787	0.00854502	0.00697468	0.00510601	0.00453379	0.00575346	0.00884309	-0.113307	0.156881
PC(10_0e_23_0)	734.606	C	0.312061	0.365828	0.379915	0.308289	0.208452	0.175082	0.246562	0.208133	0.120024	0.140703	0.146121	0.118573	0.121193	0.101792	0.14335	0.121008	-0.112834	0.388199
SM(d20_1_18_1)	757.622	C	0.0829221	0.089409	0.105882	0.0859866	0.0701955	0.0411727	0.0568644	0.0592841	0.0318931	0.0343881	0.0407238	0.0330718	0.0408113	0.0239376	0.0330607	0.0344675	-0.102006	0.22997
Hex1Cer(d18_1_26_0)	898.735	C	0.0157251	0.0158898	0.0166793	0.0160857	0.0100193	0.00939543	0.00992608	0.0104223	0.00604812	0.00611148	0.0064151	0.00618682	0.00582519	0.00546246	0.00577098	0.00605947	-0.0997041	1.4902
Hex1Cer(d20_1_24_0)	840.729	A	0.0405972	0.0397074	0.0397068	0.0366473	0.0243246	0.0218947	0.0263481	0.0247524	0.0156143	0.0152721	0.0152718	0.0140951	0.0141422	0.0127295	0.0153187	0.014391	-0.0927998	0.701139
PE(14_1e_22_6)	718.482	B	0.0237205	0.0180916	0.0224879	0.0274261	0.0151522	0.0145738	0.013886	0.0128042	0.00912328	0.00695831	0.00864918	0.0105485	0.00880939	0.00847316	0.00807326	0.0074443	-0.0921468	0.283718
PC(14_1e_22_5)	764.559	B	0.0978882	0.076202	0.0947718	0.104519	0.0625232	0.0611124	0.0541854	0.0533247	0.0376493	0.0293085	0.0364507	0.0401994	0.0363507	0.0355304	0.0315031	0.0310027	-0.0895334	0.331971
PE(14_0_20_5)	708.461	B	0.00309979	0.00279665	0.00251194	0.00336886	0.00192863	0.00161352	0.00199342	0.00182332	0.00119223	0.00107563	0.000966132	0.00129572	0.0011213	0.000938092	0.00115897	0.00106007	-0.0782297	0.286622
PC(16_0_14_1)	762.529	A	3.93669	4.07995	4.48535	4.04721	2.65522	2.38538	2.56488	2.77117	1.51411	1.56921	1.72514	1.55662	1.54373	1.38685	1.49121	1.61115	-0.0777091	0.597766
LPE(22_3)	530.325	A	0.0600635	0.0664463	0.0579516	0.040292	0.0450831	0.0273619	0.0391279	0.0298248	0.0231013	0.0255563	0.0222891	0.0154969	0.0262111	0.0159081	0.0227488	0.01734	-0.0775349	0.126312
LPE(22_5)	526.294	A	0.0726473	0.0587965	0.0623986	0.0532131	0.0481281	0.0325124	0.0403281	0.0348024	0.0279413	0.0226141	0.0239995	0.0204666	0.0279815	0.0189026	0.0234466	0.020234	-0.0766695	0.192389
dMePE(16_1_14_0)	688.492	B	0.0241215	0.0199441	0.0237835	0.0203876	0.0142944	0.0132032	0.0123851	0.0154918	0.0092775	0.00767081	0.00914749	0.0078414	0.0083107	0.00767625	0.00720066	0.00900685	-0.0757698	0.31928
PG(16_0_16_0)	721.503	B	0.161371	0.174248	0.194343	0.164299	0.114132	0.0915302	0.111838	0.120793	0.0620656	0.0670185	0.0747473	0.063192	0.066356	0.0532152	0.0650221	0.0702282	-0.0712678	0.278301
PC(16_0_16_1)	790.56	A	17.4484	17.6075	17.9236	17.3788	11.1339	11.2491	10.6182	11.4304	6.71092	6.77213	6.8937	6.68415	6.47318	6.54015	6.17338	6.6456	-0.0674714	1.45294
PC(14_0_22_5)	838.56	A	0.0489195	0.044711	0.0403214	0.0323434	0.0351964	0.0269199	0.0207716	0.0235339	0.0188152	0.0171965	0.0155082	0.0124398	0.020463	0.0156511	0.0120765	0.0136825	-0.0595483	0.105764
PE(14_0_20_4)	710.477	A	0.0668635	0.0668873	0.0730637	0.0734305	0.0451159	0.0393155	0.047858	0.0461084	0.0257167	0.0257259	0.0281014	0.0282425	0.0262302	0.0228578	0.0278244	0.0268072	-0.0578868	0.341436
PC(16_0e_17_0)	792.612	B	0.248808	0.280731	0.27088	0.232405	0.166315	0.146917	0.174188	0.169066	0.0956952	0.107974	0.104185	0.0893864	0.0966946	0.085417	0.101272	0.0982943	-0.0567364	0.289189
PC(17_0_22_3)	826.632	C	0.133783	0.123561	0.151643	0.144565	0.089879	0.0758767	0.0939131	0.0943326	0.0514548	0.0475236	0.0583241	0.055602	0.0522552	0.0441144	0.0546006	0.0548445	-0.050023	0.201399
PE(18_1e_22_5)	776.56	A	1.45606	1.22902	1.4922	1.5773	0.971626	0.847426	0.91371	0.938208	0.560023	0.472701	0.573922	0.606652	0.564899	0.49269	0.531227	0.54547	-0.0481588	0.218613
PI(18_0_22_6)	909.55	A	0.651771	0.536447	0.661859	0.709622	0.460542	0.389433	0.381343	0.409021	0.250681	0.206326	0.254561	0.272931	0.267757	0.226415	0.221711	0.237803	-0.0422475	0.152721
PE(16_0_20_3)	740.524	A	1.10696	1.22029	1.27103	1.29344	0.750914	0.734605	0.845815	0.817679	0.425755	0.469343	0.488857	0.497478	0.436578	0.427096	0.491753	0.475395	-0.0392133	0.225502
PC(18_1_18_2)	842.592	A	3.94434	3.79214	3.55309	3.57504	2.4864	2.37843	2.35899	2.47492	1.51705	1.45852	1.36657	1.37502	1.44558	1.38281	1.37151	1.43891	-0.0189503	0.180786
CL(20_4_18_1_16_0_18_1)	1452	B	0.0439962	0.0428259	0.0492837	0.0389518	0.0530467	0.0429231	0.0368624	0.00784968	0.0169216	0.0164715	0.0189553	0.0149815	0.0308411	0.0249553	0.0214316	0.00456377	-0.0180935	0.00960523
TG(12_0e_21_0_22_5)	898.822	C	0.00952511	0.00637947	0.0121995	0.00533935	0.00451823	0.00551266	0.00381497	0.00764244	0.0036635	0.00245364	0.00469213	0.0020536	0.00262688	0.00320504	0.00221801	0.00444328	-0.015491	0.0151381
PS(16_0_18_2)	758.498	A	0.751052	0.693227	0.870022	0.800475	0.529054	0.425939	0.572206	0.529651	0.288866	0.266626	0.334624	0.307875	0.30759	0.247639	0.332678	0.307937	-0.00602463	0.0177619
PE(18_1e_22_3)	780.591	B	0.735836	0.813973	0.866636	0.751725	0.613933	0.383814	0.575456	0.544119	0.283014	0.313066	0.333322	0.289125	0.356938	0.223148	0.334568	0.316348	-0.0046173	0.00965083
PC(18_3_22_6)	828.554	C	0.00900703	0.00949631	0.0123236	0.00233786	0.00547208	0.0039273	0.00687497	0.00316766	0.00346424	0.00365243	0.00473985	0.000899177	0.00318144	0.00228331	0.00399707	0.00184166	-0.00303841	0.00170378
PC(16_1_20_5)	800.52	B	0.00577625	0.00488047	0.00605715	0.00543264	0.00389153	0.00374732	0.00390435	0.00310138	0.00222163	0.0018771	0.00232967	0.00208948	0.00226252	0.00217867	0.00226997	0.00180313	-0.00221205	0.00715158
PI(18_0_22_5)	911.566	A	0.884347	0.765993	0.915118	0.978396	0.646302	0.537904	0.554471	0.600968	0.340134	0.294613	0.351969	0.376306	0.375757	0.312735	0.322367	0.3494	-0.000988245	0.0034547
Cer(d18_2_23_0)	692.62	A	0.00121617	0.000919281	0.000403027	0.00054416	0.000505223	0.000368785	0.000523212	0.000486451	0.000467759	0.00035357	0.00015501	0.000209292	0.000293734	0.00021441	0.000304193	0.00028282	0.00352859	0.00311393
PE(16_1_20_4)	738.507	A	0.522674	0.404254	0.53172	0.528918	0.341061	0.314095	0.31838	0.337818	0.201028	0.155482	0.204508	0.20343	0.198291	0.182614	0.185105	0.196406	0.0044384	0.0148806
PS(17_0_18_1)	774.529	A	0.451105	0.421579	0.484195	0.46613	0.316508	0.293796	0.302454	0.296145	0.173502	0.162146	0.186229	0.179281	0.184016	0.170812	0.175845	0.172178	0.00472552	0.0334338
PI(18_1_22_6)	907.534	B	0.237147	0.190055	0.26123	0.278491	0.165912	0.135996	0.170983	0.166805	0.0912105	0.073098	0.100473	0.107112	0.0964607	0.0790672	0.099409	0.0969798	0.00881684	0.0210022
PS(18_0_18_2)	786.529	A	2.69565	2.63955	2.94364	2.78403	1.93656	1.62903	1.9493	1.86147	1.03679	1.01521	1.13217	1.07078	1.12591	0.947112	1.13332	1.08225	0.00890427	0.0448222
PE(18_0_18_0)	770.567	A	6.51663	6.11685	6.69312	6.35548	4.39853	4.13409	4.41578	4.2552	2.50639	2.35263	2.57428	2.44441	2.55728	2.40354	2.56731	2.47395	0.0183255	0.204516
PE(18_3e_19_0)	764.557	C	0.0837082	0.0657387	0.0634338	0.0923094	0.0585039	0.0430686	0.0512792	0.0509156	0.0321955	0.0252841	0.0243976	0.0355036	0.0340139	0.0250399	0.0298135	0.0296021	0.0230563	0.050509
PI(18_0_22_3)	915.597	A	1.15573	1.14163	1.22263	1.11672	0.818415	0.769287	0.768392	0.764882	0.44451	0.439089	0.470243	0.429508	0.475822	0.44726	0.44674	0.444699	0.025244	0.290356
PE(18_0_20_3)	770.569	A	6.68379	6.24167	6.91918	6.60518	4.47876	4.34583	4.57949	4.40137	2.57069	2.40064	2.66122	2.54045	2.60393	2.52665	2.66249	2.55894	0.0258718	0.312283
PC(18_1_24_2)	868.679	C	0.044888	0.0431912	0.0467521	0.0438464	0.0312705	0.0224737	0.0370672	0.0314508	0.0172646	0.016612	0.0179816	0.016864	0.0181805	0.0130661	0.0215507	0.0182853	0.0265325	0.0612945
SM(t18_1_22_0)	803.664	C	0.0388609	0.0348034	0.0461721	0.036626	0.0270962	0.0233686	0.0260171	0.0286292	0.0149465	0.0133859	0.0177585	0.0140869	0.0157536	0.0135864	0.0151262	0.0166449	0.0266473	0.0895426
PI(18_1_22_3)	913.581	A	1.13313	1.11586	1.18595	1.22066	0.832827	0.711699	0.791771	0.806347	0.435819	0.429176	0.456134	0.469484	0.484202	0.413778	0.460332	0.468806	0.0275757	0.188376
PI(18_1_22_5)	909.55	A	0.196846	0.21458	0.263295	0.286048	0.17821	0.142826	0.160483	0.163391	0.07571	0.0825306	0.101267	0.110018	0.10361	0.0830384	0.0933043	0.0949947	0.0328711	0.0839778
PC(16_1e_15_0)	762.565	B	0.0977685	0.0857874	0.0864523	0.0672618	0.0726115	0.0263513	0.0805843	0.0670073	0.0376033	0.0329952	0.0332509	0.0258699	0.042216	0.0153205	0.0468514	0.0389577	0.0363686	0.0321736
PE(18_2_20_4)	762.508	A	0.253363	0.216296	0.246597	0.323744	0.170497	0.151099	0.186	0.19594	0.0974475	0.0831906	0.0948449	0.124517	0.099126	0.0878481	0.10814	0.113919	0.0410358	0.103059
PS(18_4_18_0)	782.498	B	0.0772686	0.0746048	0.0858964	0.0708638	0.0516593	0.0550489	0.0533611	0.0515655	0.0297187	0.0286942	0.0330371	0.0272553	0.0300345	0.0320052	0.0310239	0.0299799	0.0548877	0.381202
Cer(d20_1_24_1)	734.667	A	0.0311655	0.0327298	0.0340662	0.0290645	0.0236201	0.0181658	0.0226844	0.0233178	0.0119867	0.0125884	0.0131024	0.0111787	0.0137326	0.0105615	0.0131886	0.0135568	0.0576551	0.227744
PE(18_2e_18_2)	724.529	A	0.43542	0.468198	0.509122	0.495891	0.35635	0.313223	0.31655	0.328875	0.167469	0.180076	0.195816	0.190727	0.20718	0.182107	0.184041	0.191207	0.0593279	0.398556
PE(8_0e_14_3)	532.34	C	0.0236007	0.0245578	0.0232755	0.0175312	0.016924	0.012786	0.0179247	0.0137784	0.00907718	0.00944529	0.00895213	0.00674276	0.00983954	0.00743374	0.0104213	0.00801068	0.0596657	0.140158
PC(16_1e_18_1)	802.597	B	0.225625	0.219115	0.229373	0.187072	0.150364	0.134809	0.152811	0.155673	0.086779	0.0842751	0.0882203	0.0719509	0.087421	0.0783772	0.0888438	0.0905075	0.0617866	0.319096
PE(16_0p_17_0)	690.543	B	0.0899749	0.0955143	0.106459	0.0845071	0.0673735	0.0591621	0.0702926	0.0645234	0.0346057	0.0367363	0.0409457	0.0325027	0.0391706	0.0343966	0.0408678	0.0375136	0.0719821	0.349157
PE(16_1e_17_1)	686.513	A	0.182874	0.19211	0.211216	0.193824	0.134794	0.127956	0.143876	0.13558	0.0703361	0.0738883	0.081237	0.0745478	0.0783687	0.0743932	0.0836486	0.0788256	0.0721357	0.619363
PS(17_0_18_2)	774.528	A	0.0379892	0.0337029	0.0394063	0.0384103	0.0266579	0.0229612	0.0286181	0.0261628	0.0146112	0.0129627	0.0151563	0.0147732	0.0154988	0.0133496	0.0166384	0.0152109	0.0760584	0.40304
PA(16_0_18_1)	673.481	A	0.0764687	0.0886402	0.09773	0.149051	0.0722139	0.0716936	0.0641981	0.0703637	0.029411	0.0340924	0.0375885	0.0573275	0.0419848	0.0416823	0.0373245	0.0409091	0.0766314	0.13777
PE(16_1_18_2)	712.492	A	0.657834	0.701682	0.736707	0.688157	0.49097	0.449375	0.512654	0.491002	0.253013	0.269878	0.283349	0.264676	0.285448	0.261264	0.298055	0.285466	0.0773279	0.721092
PE(16_0_20_5)	736.492	A	0.465153	0.4138	0.487708	0.538167	0.335556	0.323703	0.324713	0.341163	0.178905	0.159154	0.18758	0.206987	0.195091	0.188199	0.188787	0.19835	0.0786381	0.433715
OAHFA(18_0_20_2)	589.52	C	0.0140206	0.0128017	0.0107096	0.0105861	0.00954475	0.00269807	0.0137766	0.0137699	0.00539254	0.00492373	0.00411908	0.00407156	0.00554927	0.00156864	0.00800966	0.00800576	0.0814941	0.0504257
Cer(d18_2_22_0)	678.604	A	0.00305524	0.003088	0.00300596	0.00225461	0.00219371	0.00162855	0.00180104	0.0023928	0.00117509	0.00118769	0.00115614	0.000867158	0.00127541	0.000946831	0.00104712	0.00139116	0.082562	0.193721
CL(20_4_18_1_18_1_18_1)	1478.01	B	0.0799675	0.082701	0.0899526	0.0873987	0.0659257	0.0553602	0.0618522	0.0558669	0.0307567	0.0318081	0.0345971	0.0336149	0.0383289	0.0321862	0.0359606	0.0324808	0.0852063	0.553539
PE(16_1_14_0)	660.461	A	0.0484746	0.0503403	0.0532943	0.052913	0.0372621	0.0346751	0.036624	0.0353474	0.0186441	0.0193616	0.0204978	0.0203512	0.021664	0.02016	0.021293	0.0205508	0.0859675	1.12643
PE(20_0e_20_4)	804.588	C	0.0900182	0.103515	0.117945	0.102562	0.0770829	0.0604917	0.0820907	0.0724518	0.0346224	0.0398135	0.0453634	0.039447	0.0448156	0.0351696	0.0477271	0.0421231	0.0903364	0.306756
PC(8_0e_21_0)	678.543	C	0.196843	0.162675	0.199526	0.202524	0.147175	0.112607	0.149776	0.128636	0.0757089	0.0625674	0.0767409	0.0778939	0.085567	0.0654692	0.0870792	0.0747882	0.0914075	0.318945
Hex1Cer(t20_0_24_0)	858.739	A	0.016259	0.013143	0.0176594	0.0157986	0.0107507	0.0114963	0.0115681	0.010307	0.00625347	0.00505499	0.00679207	0.00607639	0.00625043	0.00668388	0.00672565	0.00599242	0.0920058	0.413486
SM(t18_1_14_0)	691.538	C	0.00238764	0.00243446	0.00305621	0.00368912	0.00196602	0	0.00179213	0.00231653	0.000918321	0.000936332	0.00117547	0.00141889	0.00114304	0	0.00104194	0.00134682	0.0971925	0.190925
PE(16_1e_17_0)	688.529	A	0.111033	0.12578	0.129091	0.114136	0.0894941	0.0768412	0.0920087	0.0840183	0.0427051	0.0483769	0.0496504	0.0438986	0.0520315	0.0446751	0.0534934	0.0488479	0.107951	0.664394
TG(18_1e_18_1_18_2)	886.822	B	0.0747613	0.10699	0.0877699	0.0611056	0.0514484	0.0471952	0.071445	0.0642132	0.0287544	0.0411499	0.0337577	0.0235022	0.0299119	0.0274391	0.0415378	0.0373332	0.109789	0.19634
Cer(d19_1_24_0)	722.667	A	0.0104572	0.00968281	0.0100749	0.0082142	0.00668266	0.00594437	0.00705789	0.00781128	0.004022	0.00372416	0.00387496	0.00315931	0.00388527	0.00345603	0.00410342	0.00454144	0.112123	0.447338
PE(16_1e_22_3)	752.56	A	2.72286	3.05892	3.20103	2.73418	2.2739	1.89734	2.17277	2.05102	1.04725	1.17651	1.23116	1.05161	1.32204	1.1031	1.26324	1.19245	0.115411	0.68692
PE(20_0_20_4)	794.571	A	0.156631	0.144864	0.184846	0.173065	0.132677	0.101352	0.117849	0.122129	0.0602426	0.0557169	0.0710947	0.0665636	0.0771377	0.0589255	0.0685171	0.071005	0.119335	0.482766
LPE(18_1e)	464.315	B	0.124123	0.132934	0.131543	0.116408	0.0983187	0.0694483	0.0991709	0.099538	0.0477395	0.0511283	0.0505935	0.0447722	0.057162	0.0403769	0.0576575	0.0578709	0.119518	0.385967
PI(16_0_22_6)	881.519	A	0.407512	0.316292	0.406871	0.404054	0.298552	0.246272	0.267584	0.288343	0.156735	0.121651	0.156489	0.155405	0.173577	0.143181	0.155572	0.167642	0.120802	0.506878
TG(18_2e_16_0_16_1)	832.775	B	0.0722863	0.103263	0.0855022	0.0585202	0.0506066	0.0490683	0.0659182	0.0611209	0.0278024	0.0397165	0.0328854	0.0225078	0.0294225	0.0285281	0.0383245	0.0355354	0.121001	0.242039
PS(18_0_22_4)	838.56	A	0.47886	0.397996	0.495889	0.481053	0.349378	0.316483	0.326868	0.337481	0.184177	0.153075	0.190726	0.18502	0.203127	0.184002	0.190039	0.19621	0.121569	0.762871
PE(16_1e_16_0)	674.513	A	0.135795	0.160167	0.153013	0.133192	0.108149	0.0944156	0.111385	0.104857	0.0522289	0.0616029	0.058851	0.0512276	0.0628771	0.0548928	0.0647586	0.0609634	0.122583	0.719262
PC(16_1_13_0)	690.507	C	0.0314974	0.0296893	0.0272728	0.032658	0.0226736	0.0209198	0.023707	0.0201135	0.0121144	0.011419	0.0104895	0.0125608	0.0131823	0.0121627	0.0137831	0.0116939	0.125923	0.799012
PE(18_0_16_1)	716.524	A	0.991145	1.14024	1.1809	1.00288	0.794208	0.692442	0.807102	0.820212	0.38121	0.438552	0.454191	0.385721	0.461749	0.402582	0.469245	0.476867	0.126533	0.7258
TG(14_0e_18_1_18_1)	839.746	A	0.0882536	0.11583	0.0995934	0.0782793	0.0572268	0.0741131	0.0739528	0.0691924	0.0339437	0.0445502	0.0383051	0.0301074	0.0332714	0.043089	0.0429958	0.0402281	0.126943	0.368314
PE(16_0p_22_3)	754.574	B	2.32968	2.61896	2.56414	2.1584	1.76991	1.59242	1.89211	1.73959	0.896029	1.00729	0.986209	0.830152	1.02902	0.925826	1.10007	1.01139	0.130124	0.780906
PC(16_0_18_2)	758.569	C	32.3047	30.8934	33.8001	31.9956	23.6957	20.1926	26.2581	23.6528	12.4249	11.8821	13.0001	12.306	13.7765	11.7399	15.2663	13.7516	0.130922	0.784478
ChE(22_4)	718.65	B	0.0139587	0.0139523	0.0173179	0.0152587	0.00891056	0.0114196	0.0112823	0.0123538	0.00536872	0.00536625	0.00666072	0.00586872	0.00518056	0.00663933	0.00655947	0.00718246	0.131246	0.473333
PS(16_1_18_1)	760.512	A	0.248522	0.249931	0.278844	0.238986	0.192547	0.166312	0.194391	0.183436	0.0955854	0.0961274	0.107248	0.0919177	0.111946	0.0966928	0.113018	0.106649	0.131615	0.958105
TG(17_0_17_1_18_2)	874.786	A	0.0349927	0.025772	0.0303319	0.040024	0.0241823	0.0209065	0.024596	0.0247883	0.0134587	0.00991233	0.0116661	0.0153938	0.0140595	0.012155	0.0143	0.0144118	0.138959	0.414839
PE(8_1e_14_4)	528.308	C	0.0354521	0.0264016	0.027927	0.0244653	0.02399	0.018533	0.0224501	0.0180465	0.0136354	0.0101544	0.0107412	0.00940974	0.0139477	0.010775	0.0130524	0.0104921	0.13912	0.397527
PC(20_5_18_2)	826.536	B	0.0057446	0.00522169	0.00666164	0.00729412	0.00454109	0.00387551	0.0039546	0.00597618	0.00220946	0.00200834	0.00256217	0.00280543	0.00264017	0.00225321	0.00229919	0.00347453	0.143815	0.342693
TG(18_1_17_1_20_5)	891.744	A	0.0502851	0.0514269	0.0504934	0.0440479	0.0314992	0.0341646	0.0402221	0.038126	0.0193404	0.0197796	0.0194205	0.0169415	0.0183135	0.0198631	0.023385	0.0221663	0.145793	0.76113
PE(18_2e_22_5)	774.544	A	0.312741	0.296753	0.33523	0.384915	0.253806	0.225533	0.234585	0.257236	0.120285	0.114136	0.128935	0.148044	0.147561	0.131124	0.136386	0.149556	0.14769	0.785556
SM(t18_1_16_0)	719.57	C	0.0195141	0.0197162	0.0210133	0.0223412	0.0176598	0.0125861	0.0137092	0.0173712	0.00750541	0.00758315	0.00808203	0.00859278	0.0102673	0.0073175	0.00797046	0.0100996	0.153413	0.545491
PE(17_0_20_5)	750.508	A	0.0454004	0.0444317	0.0469116	0.0427384	0.0417638	0.0252153	0.032911	0.0346865	0.0174617	0.0170891	0.0180429	0.0164378	0.0242813	0.01466	0.0191343	0.0201666	0.158534	0.468591
PE(18_0_19_0)	784.583	B	0.419133	0.369798	0.405478	0.395667	0.320067	0.272221	0.286387	0.298804	0.161205	0.14223	0.155953	0.15218	0.186086	0.158268	0.166504	0.173723	0.161668	1.38278
PC(16_1_18_1)	816.576	A	20.7182	20.0827	20.8622	19.9744	15.1896	14.5938	15.1544	15.7384	7.96854	7.72412	8.02392	7.68248	8.83114	8.48478	8.81073	9.15023	0.167746	3.07308
PE(16_0_14_0)	686.473	C	0.104543	0.111397	0.100211	0.104309	0.0755809	0.0964698	0.0739745	0.0693034	0.040209	0.042845	0.0385429	0.0401187	0.0439424	0.0560871	0.0430084	0.0402927	0.170259	0.770261
CL(18_1_16_1_20_3_18_1)	1452	A	0.264658	0.218034	0.280501	0.27221	0.200839	0.169345	0.193466	0.206903	0.101791	0.0838593	0.107885	0.104696	0.116767	0.0984567	0.11248	0.120293	0.17251	0.829747
CL(20_2_18_2_18_1_16_1)	1452	A	0.264658	0.218034	0.280501	0.27221	0.200839	0.169345	0.193466	0.206903	0.101791	0.0838593	0.107885	0.104696	0.116767	0.0984567	0.11248	0.120293	0.17251	0.829747
PE(16_1e_22_5)	748.529	A	3.28779	2.98845	3.60221	3.80402	2.56032	2.30075	2.5233	2.80411	1.26453	1.1494	1.38546	1.46309	1.48856	1.33765	1.46704	1.6303	0.173195	0.913757
MePC(16_1_18_2)	787.596	C	0.108819	0.088488	0.121191	0.109167	0.0798239	0.0638584	0.0881325	0.088134	0.0418535	0.0340339	0.046612	0.0419872	0.0464092	0.037127	0.0512398	0.0512407	0.174617	0.562186
Hex1Cer(d20_1_24_1)	838.713	A	0.0462256	0.0447146	0.0497774	0.0445708	0.0342641	0.0311669	0.0376227	0.0357153	0.0177791	0.0171979	0.0191451	0.0171426	0.019921	0.0181203	0.0218736	0.0207647	0.177062	1.38501
TG(18_1_18_2_20_2)	931.773	A	0.245031	0.278014	0.276738	0.232686	0.183405	0.195991	0.197771	0.196333	0.0942425	0.106929	0.106438	0.0894945	0.106631	0.113948	0.114983	0.114147	0.183083	1.42
PS(18_1_18_1)	788.544	A	1.09737	1.08116	1.11334	1.10965	0.839594	0.721325	0.924238	0.841097	0.422065	0.415832	0.428206	0.426788	0.488136	0.419375	0.537348	0.48901	0.186489	1.33238
SM(d18_1_18_1)	729.591	C	0.113464	0.10537	0.117848	0.109497	0.0789554	0.0730853	0.0799268	0.10754	0.0436401	0.040527	0.0453262	0.0421143	0.0459043	0.0424914	0.0464691	0.062523	0.186817	0.71454
SM(d18_0_20_4)	753.591	B	0.0261196	0	0.0229647	0.0268279	0.0148296	0.0257302	0.0150795	0.0227987	0.010046	0	0.00883259	0.0103184	0.00862184	0.0149594	0.00876716	0.0132551	0.188378	0.316792
ChE(20_4)	690.618	B	0.0653116	0.0492437	0.0705481	0.0674115	0.0426674	0.0401281	0.0567984	0.0512231	0.0251199	0.0189399	0.0271339	0.0259275	0.0248066	0.0233303	0.0330223	0.0297808	0.191481	0.538357
Hex1Cer(m22_0_18_1)	826.678	B	0.0510249	0.0463925	0.051821	0.0483708	0.0403972	0.0329477	0.0379668	0.0382597	0.019625	0.0178433	0.0199312	0.0186041	0.0234867	0.0191556	0.0220737	0.022244	0.191661	1.41281
PE(17_0_22_3)	782.571	A	0.418348	0.416774	0.433589	0.445224	0.338164	0.305447	0.335755	0.327863	0.160903	0.160298	0.166765	0.17124	0.196607	0.177585	0.195206	0.190618	0.204682	2.63752
PE(16_0_16_1)	690.507	A	0.963016	1.06447	1.04823	0.959241	0.833031	0.655975	0.840285	0.764953	0.370391	0.409412	0.403165	0.368939	0.484321	0.381381	0.488538	0.44474	0.207818	1.19228
PE(18_2e_18_1)	726.544	A	1.45424	1.61233	1.63635	1.4912	1.21993	1.0692	1.26719	1.19722	0.559322	0.620127	0.629367	0.573539	0.709261	0.621627	0.736737	0.696057	0.213172	1.71461
PE(20_1_18_1)	794.567	A	0.241486	0.1336	0.246256	0.28026	0.164924	0.146955	0.170998	0.186133	0.0928791	0.0513844	0.0947138	0.107792	0.0958858	0.0854391	0.0994176	0.108217	0.213781	0.373415
SM(d18_1_21_0)	773.653	C	0.034074	0.0277948	0.0340452	0.0292403	0.0228372	0.0176725	0.0299885	0.0271878	0.0131054	0.0106903	0.0130943	0.0112463	0.0132775	0.0102747	0.0174352	0.0158069	0.216446	0.54832
PE(16_0p_16_0)	676.528	B	0.123283	0.132342	0.128996	0.102663	0.0970837	0.0870393	0.0981656	0.0915314	0.0474166	0.0509008	0.0496139	0.0394858	0.056444	0.0506042	0.057073	0.0532159	0.218897	1.26078
Hex1Cer(d18_0_26_2)	896.72	C	0.0176953	0.0168075	0.018161	0.0169499	0.0136063	0.0122815	0.0132464	0.0146279	0.00680588	0.00646443	0.006985	0.00651919	0.00791064	0.00714039	0.00770142	0.00850457	0.221226	2.04203
PI(18_1_18_2)	859.534	A	0.948063	0.940076	1.03566	1.01821	0.793362	0.680376	0.78499	0.792057	0.36464	0.361568	0.398332	0.39162	0.461257	0.395567	0.45639	0.460498	0.224698	1.87913
PE(16_1e_18_1)	700.529	A	4.98794	5.30716	5.47842	5.05381	4.12242	3.61725	4.33287	4.05197	1.91844	2.04122	2.10709	1.94377	2.39675	2.10305	2.51911	2.35579	0.224806	1.91752
MePC(10_0e_20_4)	720.494	C	0.00998639	0.0063212	0.00937832	0.00744271	0.00697303	0.00614854	0.00558408	0.00660789	0.00384092	0.00243123	0.00360705	0.00286258	0.00405409	0.00357473	0.00324656	0.0038418	0.226657	0.648837
PS(18_0_20_3)	812.545	A	0.483326	0.432762	0.626936	0.542295	0.414834	0.387975	0.404269	0.398311	0.185895	0.166447	0.241129	0.208575	0.241182	0.225567	0.23504	0.231576	0.232039	1.03141
PE(18_2e_17_0)	714.544	C	0.320528	0.339528	0.349711	0.342501	0.270234	0.243177	0.278601	0.259585	0.12328	0.130588	0.134504	0.131731	0.157113	0.141382	0.161977	0.150921	0.232195	2.44423
Cer(d19_1_24_1)	720.651	A	0.00662377	0.0059148	0.00524014	0.00420734	0.00450181	0.00363893	0.00444485	0.00433364	0.00254761	0.00227492	0.00201544	0.00161821	0.00261733	0.00211566	0.00258421	0.00251956	0.232912	0.723082
FA 22_3	333.28	D	0.075006	0.077769	0.0818306	0.058999	0.0659806	0.0478343	0.0604513	0.0542189	0.0288485	0.0299111	0.0314733	0.0226919	0.0383608	0.0278107	0.0351461	0.0315226	0.234885	0.806286
Hex1Cer(d16_1_26_1)	868.688	C	0.000318335	0.00037798	0.000389658	0	0.000325321	0	0.000395392	0.000172669	0.000122437	0.000145377	0.000149868	0	0.00018914	0	0.000229879	0.000100389	0.2368	0.252548
SM(d18_1_18_0)	731.606	C	0.693592	0.658244	0.745811	0.670845	0.555106	0.458935	0.570722	0.591908	0.266766	0.253171	0.28685	0.258017	0.322736	0.266823	0.331815	0.344132	0.244031	1.43825
LPE(16_1e)	436.283	B	0.260848	0.277475	0.287459	0.235845	0.217906	0.17005	0.22759	0.221882	0.100326	0.106721	0.110561	0.0907096	0.12669	0.0988664	0.13232	0.129001	0.248385	1.11905
CL(18_2_18_1_18_1_18_1)	1454.01	A	0.337366	0.317531	0.345171	0.311761	0.274039	0.225316	0.267534	0.268263	0.129756	0.122127	0.132758	0.119908	0.159325	0.130998	0.155543	0.155967	0.251288	1.82863
SM(d18_1_24_0)	815.7	C	0.738845	0.658079	0.770563	0.716589	0.593542	0.481513	0.624975	0.583131	0.284171	0.253107	0.29637	0.275611	0.345083	0.27995	0.363358	0.33903	0.254592	1.43129
SM(d20_1_24_3)	837.684	B	0.170294	0.150329	0.175205	0.174556	0.135353	0.109313	0.150537	0.138008	0.0654978	0.0578188	0.0673866	0.067137	0.0786936	0.063554	0.0875217	0.080237	0.258895	1.23265
PC(17_0_18_2)	772.585	C	2.21785	2.03257	2.36283	2.29205	1.78653	1.52873	1.93826	1.82063	0.853019	0.781757	0.908782	0.881559	1.03868	0.888797	1.1269	1.05851	0.260872	1.62725
PC(8_0e_23_0)	706.574	C	0.321588	0.365798	0.373409	0.311298	0.279893	0.228656	0.308961	0.273107	0.123688	0.140691	0.143619	0.11973	0.162728	0.13294	0.179628	0.158783	0.261011	1.23484
PE(20_1_22_3)	822.602	A	0.137979	0.145165	0.147298	0.152628	0.136362	0.0893862	0.11892	0.123327	0.0530689	0.0558325	0.0566531	0.058703	0.0792802	0.0519687	0.0691397	0.0717019	0.262892	1.01047
PE(18_1p_18_2)	726.543	B	0.222979	0.220421	0.237895	0.219439	0.202723	0.153891	0.193687	0.169302	0.085761	0.0847773	0.0914982	0.0843998	0.117862	0.0894717	0.112609	0.0984312	0.264461	1.49931
TG(16_0e_16_0_22_5)	884.807	B	0.0534077	0.0681816	0.0635035	0.0480734	0.0379596	0.0436598	0.0492586	0.0543791	0.0205414	0.0262237	0.0244244	0.0184898	0.0220695	0.0253836	0.0286387	0.0316157	0.265026	0.824154
SM(d17_0_16_0)	691.575	C	0.0162144	0.017839	0.0187769	0.014669	0.01205	0.0128407	0.014762	0.0139986	0.00623632	0.00686116	0.0072219	0.00564192	0.00700584	0.00746552	0.00858256	0.00813874	0.266825	1.39998
PE(18_0p_22_3)	782.606	B	0.35278	0.380437	0.383889	0.319119	0.298889	0.243711	0.325976	0.285506	0.135684	0.146322	0.14765	0.122738	0.173772	0.141692	0.189521	0.165992	0.276568	1.3749
PC(14_1e_17_0)	704.559	B	0.0740934	0.0704734	0.0824048	0.0705815	0.061366	0.0541416	0.0655024	0.0583886	0.0284975	0.0271052	0.0316942	0.0271467	0.0356779	0.0314777	0.0380828	0.0339469	0.281845	1.93848
SM(d20_0_18_1)	759.638	C	0.378535	0.382791	0.429439	0.375782	0.327465	0.264487	0.336214	0.337176	0.14559	0.147227	0.165169	0.144532	0.190387	0.153771	0.195473	0.196033	0.283123	1.59637
PI(18_0_22_4)	932.622	B	0.146822	0.144142	0.152689	0.162249	0.127702	0.123203	0.112205	0.125305	0.0564702	0.0554393	0.0587266	0.0624037	0.0742455	0.0716298	0.0652352	0.0728519	0.284859	2.64541
SM(d19_0_24_4)	823.669	C	0.0395724	0.0349746	0.0372874	0.036514	0.0294192	0.0264137	0.0299407	0.0343404	0.0152202	0.0134518	0.0143413	0.0140439	0.0171042	0.0153568	0.0174074	0.0199653	0.286633	1.80107
PC(19_1_20_4)	822.601	C	0.0370476	0.0292945	0.0339203	0.0318605	0.0282517	0.0224803	0.0298982	0.0262814	0.0142491	0.0112671	0.0130463	0.012254	0.0164254	0.0130699	0.0173827	0.0152799	0.287897	1.34369
PC(16_0e_15_0)	764.581	B	0.154435	0.20181	0.188001	0.154816	0.14205	0.133644	0.141326	0.143883	0.0593982	0.077619	0.0723081	0.0595446	0.0825873	0.0777	0.0821662	0.0836527	0.287959	1.53264
DG(16_0_18_2)	610.54	A	0.681797	0.727947	0.852774	0.788858	0.609533	0.610323	0.672386	0.57267	0.26223	0.27998	0.32799	0.303407	0.354379	0.354839	0.390922	0.332948	0.290894	1.85443
Hex2Cer(d18_1_16_0	878.62	A	0.0521584	0.0498939	0.050789	0.047454	0.04541	0.0414035	0.0349511	0.0409647	0.0200609	0.01919	0.0195342	0.0182516	0.0264012	0.0240718	0.0203204	0.0238167	0.291021	1.88436
SM(t18_0_24_0)	891.717	C	0.024417	0.0230167	0.0289082	0.0205942	0.0205437	0.0183694	0.0182627	0.0208994	0.00939115	0.00885257	0.0111185	0.00792086	0.011944	0.0106799	0.0106179	0.0121508	0.292124	1.36365
PE(16_0p_18_1)	702.543	B	4.34289	4.58781	4.68258	4.0336	3.70488	3.23573	3.8709	3.51779	1.67034	1.76454	1.80099	1.55138	2.154	1.88124	2.25052	2.04523	0.294859	2.15334
LPC(16_1)	552.331	A	0.0693967	0.0636059	0.0718552	0.0583696	0.060222	0.040995	0.0537394	0.0611831	0.026691	0.0244638	0.0276366	0.0224498	0.0350128	0.0238343	0.0312438	0.0355716	0.298732	1.03273
PC(16_0_22_5)	830.567	A	0.0444243	0.0375627	0.0406986	0.0451014	0.0377074	0.0330147	0.0346796	0.0311791	0.0170863	0.0144472	0.0156533	0.0173467	0.0219229	0.0191946	0.0201625	0.0181274	0.299559	1.91765
SM(d17_0_18_0)	719.606	C	0.0157437	0.0151525	0.0150332	0.0204153	0.0141554	0.0116226	0.0127045	0.015554	0.00605527	0.0058279	0.00578198	0.00785202	0.00822991	0.00675733	0.00738633	0.009043	0.303298	1.14155
PS(18_0_22_5)	838.559	A	0.564743	0.445515	0.52256	0.625464	0.450094	0.39083	0.447366	0.465792	0.217209	0.171352	0.200984	0.240563	0.261683	0.227227	0.260097	0.270809	0.304683	1.38922
PE(18_0_20_4)	766.539	A	14.008	13.0362	14.8388	14.8927	12.2113	10.3749	11.832	12.0011	5.38771	5.01392	5.70724	5.72798	7.0996	6.03189	6.87905	6.9774	0.304704	2.31547
PE(18_0_22_5)	792.555	A	2.20937	1.45757	2.8928	1.71549	1.71397	1.53372	1.63524	1.66254	0.849758	0.560604	1.11261	0.659803	0.996493	0.891696	0.95072	0.966594	0.305848	0.673847
PG(16_0_16_1)	738.528	B	0.0321296	0.0319332	0.0342572	0.0330729	0.0271406	0.0225979	0.029079	0.0293462	0.0123576	0.012282	0.0131758	0.0127203	0.0157794	0.0131383	0.0169064	0.0170618	0.308296	1.84289
DG(18_0_16_0)	614.572	B	1.30818	1.96715	1.74612	1.45866	1.1989	1.21697	1.34689	1.50574	0.503146	0.756597	0.671584	0.561024	0.697035	0.707539	0.783073	0.875433	0.309263	1.05664
PE(16_1e_20_1)	728.56	A	1.17829	1.29221	1.33898	1.19294	1.09222	0.919549	1.08587	1.01335	0.453189	0.497005	0.51499	0.458823	0.635014	0.534622	0.631322	0.589155	0.311618	2.27628
SM(d17_0_18_1)	775.597	C	0.0831213	0.0738718	0.0779822	0.0787664	0.0736357	0.0683848	0.0677747	0.0502471	0.0319697	0.0284122	0.0299931	0.0302948	0.0428115	0.0397586	0.0394039	0.0292134	0.311828	1.30777
PE(18_1p_22_5)	776.559	B	0.125603	0.104843	0.121296	0.137015	0.108664	0.0870471	0.10266	0.103318	0.0483089	0.0403242	0.0466523	0.052698	0.0631768	0.0506088	0.059686	0.0600684	0.314788	1.59744
Cer(d18_1_24_0	666.639	B	0.0241866	0.0212833	0.0232994	0.0210286	0.0191386	0.0173052	0.0181501	0.019313	0.00930255	0.00818587	0.00896132	0.00808792	0.0111271	0.0100612	0.0105524	0.0112285	0.31627	2.66941
PE(14_0_22_6)	734.477	A	0.0180811	0.016187	0.0216816	0.020255	0.0169213	0.0140282	0.015871	0.0158131	0.00695426	0.00622576	0.00833909	0.00779039	0.00983797	0.00815594	0.00922732	0.00919367	0.318758	1.58354
DG(17_0_17_0)	619.527	B	0.924673	1.43538	1.21954	1.03972	0.825199	0.907084	0.969887	1.07502	0.355644	0.55207	0.469056	0.39989	0.479767	0.527374	0.563888	0.625014	0.318952	1.03201
Cer(t20_0_24_1)	752.677	C	0.00369201	0.0040919	0.0038487	0.00284396	0.00327317	0.00241569	0.00319118	0.00304698	0.00142	0.00157381	0.00148027	0.00109383	0.00190301	0.00140447	0.00185534	0.0017715	0.31989	1.08902
Hex1Cer(m21_0_18_1)	812.662	B	0.00904069	0.0090396	0.009961	0.00944378	0.0076259	0.00698104	0.00790529	0.00849673	0.00347719	0.00347677	0.00383115	0.00363222	0.00443366	0.00405874	0.0045961	0.00493996	0.320035	2.49188
SM(d18_1_23_0)	859.691	C	0.151059	0.145228	0.162383	0.148796	0.122885	0.105814	0.137969	0.138729	0.0580997	0.0558571	0.062455	0.0572294	0.0714447	0.0615195	0.0802143	0.0806563	0.323418	1.78309
PE(16_0p_22_5)	750.543	B	2.60656	1.66455	2.00634	2.6505	1.84369	1.65181	1.74562	2.04839	1.00252	0.64021	0.771669	1.01942	1.07191	0.960353	1.0149	1.19092	0.325294	0.954357
MePC(14_0e_20_4)	776.557	C	0.183747	0.215608	0.212817	0.197623	0.159597	0.158281	0.168147	0.186766	0.070672	0.0829262	0.0818528	0.0760088	0.0927887	0.092024	0.0977596	0.108585	0.328446	2.28768
PC(16_1_24_2)	840.648	C	0.283812	0.272112	0.300009	0.262555	0.216768	0.210519	0.257932	0.250656	0.109158	0.104658	0.115388	0.100983	0.126028	0.122395	0.149961	0.14573	0.335113	2.13335
SM(d18_1_15_1)	687.544	C	0.0100047	0.00877895	0.0104303	0.0103514	0.0105267	0.00624139	0.00864872	0.00815378	0.00384797	0.00337652	0.00401164	0.00398131	0.00612019	0.00362872	0.00502832	0.00474057	0.337776	1.05532
PC(16_1_12_0)	676.491	C	0.178701	0.189863	0.199848	0.18575	0.150062	0.178781	0.162772	0.143805	0.0687313	0.0730243	0.0768645	0.0714423	0.0872452	0.103942	0.094635	0.0836073	0.345088	2.37804
CL(18_2_16_1_18_2_18_1)	1423.96	A	0.202166	0.177286	0.204444	0.210244	0.179607	0.158602	0.157815	0.171879	0.0777561	0.0681868	0.0786322	0.0808629	0.104423	0.0922103	0.091753	0.0999295	0.347229	2.55601
Cer(d18_2_24_0)	646.614	A	0.000508125	0.000454179	0.00051347	0.000491403	0.000428282	0.000441802	0.00034065	0.000453631	0.000195433	0.000174684	0.000197489	0.000189001	0.000249001	0.000256862	0.000198052	0.000263739	0.347637	1.82772
MePC(14_0e_22_6)	800.557	C	0.0733092	0.054642	0.0787868	0.0744637	0.059961	0.0537201	0.0576415	0.0636887	0.0281958	0.0210162	0.0303026	0.0286399	0.0348611	0.0312326	0.0335125	0.0370283	0.348387	1.445
CL(18_4_18_1_16_1_18_2)	1419.93	B	0.114414	0.117142	0.129232	0.120845	0.109332	0.0875409	0.103405	0.107277	0.0440053	0.0450546	0.0497044	0.0464789	0.0635648	0.0508959	0.0601192	0.0623702	0.351291	2.27418
PE(18_0p_22_5)	778.574	B	0.496518	0.405281	0.479724	0.510455	0.424103	0.354921	0.405621	0.41117	0.190969	0.155877	0.184509	0.196329	0.246571	0.206349	0.235826	0.239052	0.352858	2.02738
SM(d18_1_23_1)	799.669	C	0.0506833	0.0537027	0.0529379	0.0574371	0.0449053	0.0359592	0.0555834	0.0471504	0.0194936	0.0206549	0.0203607	0.0220912	0.0261077	0.0209065	0.032316	0.027413	0.354199	1.40575
PE(18_0_18_1)	768.551	A	16.2234	14.4188	15.0564	15.909	14.2353	13.4011	12.3594	12.4047	6.23977	5.54567	5.7909	6.11885	8.27636	7.79134	7.18568	7.21202	0.361622	2.94014
PE(16_0_20_4)	738.508	A	1.96659	1.79634	1.78786	2.05707	1.6135	1.61588	1.57706	1.65096	0.756382	0.690898	0.687637	0.79118	0.938079	0.939467	0.916894	0.959859	0.361972	3.37502
Hex1Cer(t17_1_24_0)	872.683	C	0.022012	0.023386	0.0247678	0.0228546	0.0194927	0.0179278	0.020668	0.0211193	0.00846615	0.00899462	0.00952609	0.00879024	0.0113329	0.0104232	0.0120163	0.0122787	0.362655	2.8957
CL(18_2_18_1_20_4_16_1)	1447.96	B	0.173574	0.164	0.182707	0.161787	0.155909	0.135925	0.135875	0.15502	0.0667593	0.063077	0.0702721	0.0622257	0.0906449	0.0790259	0.0789971	0.0901281	0.367445	2.74746
SM(d17_1_16_0)	689.559	C	0.520983	0.457833	0.533751	0.51865	0.452812	0.361879	0.464864	0.463802	0.200378	0.17609	0.205289	0.199481	0.263263	0.210395	0.27027	0.269652	0.370541	1.98902
FA 16_2	251.202	D	0.00848971	0.00734487	0.00777348	0.00487558	0.00706303	0.00465956	0.00625694	0.00621622	0.00326527	0.00282495	0.0029898	0.00187522	0.00410641	0.00270905	0.00363776	0.00361408	0.37495	0.864253
DG(20_2e_18_1)	655.564	C	0.0674953	0.0534431	0.0696809	0.067214	0.0524514	0.04982	0.0561139	0.0632475	0.0259597	0.020555	0.0268004	0.0258515	0.030495	0.0289651	0.0326243	0.0367718	0.379792	1.77919
PE(17_0_20_4)	752.524	A	0.446978	0.395447	0.484483	0.480448	0.392019	0.392288	0.377094	0.390826	0.171915	0.152095	0.18634	0.184788	0.227918	0.228075	0.219241	0.227224	0.381046	2.82365
PG(18_1_22_6)	838.559	B	0.0216351	0.0237829	0.0221791	0.0271545	0.0219361	0.0172424	0.0206243	0.0219967	0.00832118	0.00914727	0.00853042	0.010444	0.0127535	0.0100247	0.0119909	0.0127888	0.382906	1.87239
SM(d14_0_18_0)	735.566	C	0.0252091	0.0268524	0.0275339	0.0259847	0.0249295	0.0194597	0.0252798	0.0219287	0.00969579	0.0103278	0.01059	0.00999412	0.0144939	0.0113138	0.0146976	0.0127493	0.383924	2.21428
MePC(16_1_20_5)	814.536	C	0.0392351	0.0394205	0.0367952	0.0490009	0.0345018	0.0425536	0.0296709	0.0358383	0.0150904	0.0151617	0.014152	0.0188465	0.0200592	0.0247404	0.0172505	0.0208362	0.386873	1.48699
CL(18_1_18_1_18_0_18_2)	1456.03	A	0.284349	0.275162	0.312643	0.274343	0.270848	0.217147	0.250988	0.255103	0.109365	0.105832	0.120247	0.105516	0.15747	0.126248	0.145923	0.148316	0.387705	2.52482
SM(d18_1_13_0)	719.534	C	0.00391419	0.00343761	0.00381738	0.00395314	0.00333691	0.00292103	0.00314596	0.00372678	0.00150546	0.00132216	0.00146822	0.00152044	0.00194007	0.00169827	0.00182904	0.00216673	0.388782	2.36224
DG(20_2e_18_0)	657.579	C	0.0572646	0.0569132	0.071236	0.0684348	0.0543099	0.0494973	0.0551534	0.0605809	0.0220248	0.0218897	0.0273985	0.0263211	0.0315755	0.0287775	0.0320659	0.0352215	0.390387	2.03093
PE(18_2e_22_3)	778.576	B	0.790747	0.790891	0.88291	0.849921	0.803368	0.637756	0.728786	0.725287	0.304134	0.304189	0.339581	0.326893	0.467074	0.370788	0.423713	0.421679	0.397808	2.62735
PI(16_0e_16_0)	795.539	B	0.0172323	0.0189831	0.0191585	0.0164592	0.013882	0.0133228	0.0174629	0.0185257	0.00662781	0.0073012	0.00736865	0.00633046	0.00807091	0.00774583	0.0101529	0.0107707	0.399659	1.66224
CL(15_0_18_1_16_1_18_1)	1387.96	A	0.0934139	0.0949575	0.102378	0.0902087	0.0841206	0.0690265	0.088997	0.0922405	0.0359284	0.0365221	0.0393761	0.0346957	0.0489073	0.0401317	0.0517425	0.0536282	0.400791	2.13344
SM(d18_1_16_0)	761.581	C	9.77688	9.51785	9.95632	9.59475	8.60133	8.22261	8.53199	8.57457	3.76034	3.66071	3.82935	3.69029	5.00078	4.78059	4.96046	4.98521	0.400912	5.88122
CL(18_2_18_1_16_1_18_1)	1425.98	A	0.595114	0.590532	0.646388	0.601579	0.573532	0.462078	0.527386	0.573401	0.22889	0.227128	0.248611	0.231377	0.333449	0.26865	0.30662	0.333373	0.403623	2.64567
PS(20_0_18_2)	838.557	C	0.0431841	0.0426094	0.0317833	0.0283782	0.0276146	0.0275977	0.0419138	0.0307251	0.0166093	0.0163882	0.0122243	0.0109147	0.016055	0.0160452	0.0243685	0.0178634	0.406628	1.0043
PE(18_1p_18_1)	728.559	B	0.665803	0.726213	0.718426	0.678333	0.622221	0.525612	0.677542	0.631243	0.256078	0.279313	0.276318	0.260897	0.361757	0.305588	0.39392	0.367002	0.408006	2.56156
PC(11_0_22_6)	736.491	C	0.00795676	0.00643633	0.0090131	0.00935792	0.00712275	0.00717022	0.006488	0.00783678	0.00306029	0.00247551	0.00346658	0.0035992	0.00414114	0.00416873	0.00377209	0.00455627	0.412567	1.66563
PE(20_5_18_2)	760.492	A	0.0810188	0.0809695	0.0952897	0.0905343	0.0916111	0.0709562	0.0642978	0.081633	0.0311611	0.0311421	0.0366499	0.0348209	0.0532622	0.0412536	0.0373825	0.047461	0.413591	1.76488
MePC(16_2e_22_6)	824.557	C	0.0392094	0.0325072	0.037204	0.0380303	0.0322105	0.0366201	0.0280759	0.0328394	0.0150805	0.0125028	0.0143092	0.014627	0.018727	0.0212908	0.0163232	0.0190927	0.413692	2.24007
TG(16_1e_18_1_18_1)	860.807	B	0.120546	0.18107	0.141504	0.107137	0.106385	0.101207	0.144769	0.128175	0.0463637	0.0696423	0.0544245	0.0412065	0.0618518	0.0588411	0.0841678	0.0745203	0.414113	1.05873
PE(18_1_24_2)	824.617	A	0.0638962	0.0664396	0.0691779	0.0654946	0.0645825	0.0483972	0.0661053	0.0563999	0.0245755	0.0255537	0.0266069	0.0251902	0.037548	0.0281379	0.0384333	0.0327907	0.41537	2.09906
Hex1Cer(d18_1_23_0	814.677	A	0.0541318	0.0551089	0.0579562	0.046755	0.0468228	0.0443204	0.0464939	0.0508348	0.0208199	0.0211957	0.0222909	0.0179827	0.0272225	0.0257677	0.0270313	0.0295551	0.415901	2.74531
PC(17_1_18_1)	830.592	A	1.32748	1.21625	2.05185	1.28598	1.28129	1.2149	1.25744	1.32186	0.510569	0.467787	0.789171	0.494607	0.744937	0.706338	0.731069	0.768521	0.416249	1.25875
PS(18_0_20_4)	810.529	A	0.49457	0.456335	0.495555	0.516313	0.437985	0.396255	0.438482	0.463788	0.190219	0.175513	0.190598	0.198582	0.254642	0.230381	0.254932	0.269644	0.418538	3.35776
Hex1Cer(m20_0_18_1)	798.646	B	0.0128359	0.0143702	0.0137809	0.0143563	0.0131429	0.0101052	0.0127104	0.0132352	0.00493687	0.005527	0.00530036	0.00552165	0.00764122	0.00587514	0.00738978	0.0076949	0.419144	2.23917
SM(d17_1_18_1)	715.575	C	0.00862423	0.00774129	0.0100327	0.0124705	0.00930806	0.0070044	0.00736341	0.0106799	0.00331701	0.00297742	0.00385873	0.00479633	0.00541166	0.00407232	0.00428105	0.00620923	0.420075	1.05333
PC(14_0e_16_0)	692.559	C	0.414294	0.475947	0.466808	0.394023	0.393525	0.309556	0.469336	0.390355	0.159344	0.183056	0.179541	0.151547	0.228793	0.179975	0.27287	0.226951	0.420977	1.62648
PE(16_0_22_6)	764.523	A	1.25024	1.01577	1.23911	1.29561	1.1012	1.00991	1.06296	1.07541	0.480861	0.39068	0.476579	0.498312	0.64023	0.587156	0.618	0.625238	0.425744	2.65013
SM(d18_1_22_0)	845.675	C	0.393942	0.37572	0.401393	0.388816	0.351721	0.301601	0.380867	0.356997	0.151516	0.144508	0.154382	0.149545	0.204489	0.17535	0.221434	0.207556	0.426235	2.92042
PE(22_6_21_1)	854.567	C	0.0608904	0.0563327	0.0644666	0.0592117	0.0537514	0.0448629	0.0620695	0.0550385	0.0234194	0.0216664	0.0247948	0.0227737	0.0312508	0.0260831	0.0360869	0.0319992	0.428985	2.19238
SM(d14_0_18_1)	733.55	C	0.408536	0.377934	0.432388	0.41993	0.377641	0.320688	0.383961	0.382167	0.157129	0.145359	0.166303	0.161511	0.219559	0.186447	0.223233	0.22219	0.431673	2.91501
PE(16_1e_15_0)	660.497	C	0.0268906	0.0364765	0.0373318	0.0344092	0.0299694	0.027364	0.03411	0.0288748	0.0103426	0.0140294	0.0143584	0.0132343	0.0174241	0.0159093	0.0198314	0.0167876	0.435728	1.84161
LPE(22_4)	528.31	A	0.0454842	0.0422898	0.0477878	0.0367995	0.0482293	0.0329029	0.0401485	0.0342119	0.0174939	0.0162653	0.0183799	0.0141536	0.0280403	0.0191296	0.0233421	0.0198907	0.437594	1.57179
SM(d18_1_22_3)	781.622	C	0.0329651	0.037678	0.0396546	0.0346594	0.0297154	0.0306946	0.0330429	0.0365717	0.0126789	0.0144915	0.0152518	0.0133305	0.0172764	0.0178457	0.019211	0.0212626	0.438321	2.56968
DG(16_1_18_1)	610.54	A	3.2177	3.55756	4.11308	3.69131	3.12523	3.15376	3.60313	3.22397	1.23758	1.36829	1.58195	1.41973	1.81699	1.83358	2.09484	1.8744	0.445567	2.65836
PE(20_0_20_5)	792.555	A	0.315545	0.279293	0.330234	0.379132	0.295792	0.286988	0.30245	0.28323	0.121364	0.10742	0.127013	0.14582	0.171972	0.166854	0.175843	0.164668	0.44571	2.50738
PE(16_0p_17_1)	688.528	B	0.0881367	0.102124	0.102719	0.0924195	0.0805663	0.0796393	0.101815	0.0869895	0.0338987	0.0392785	0.0395074	0.0355459	0.0468408	0.0463019	0.059195	0.0505753	0.448992	2.42057
CL(18_2_16_1_16_1_18_1)	1397.95	A	0.367768	0.362341	0.405278	0.361751	0.348357	0.30249	0.336919	0.368909	0.141449	0.139362	0.155876	0.139135	0.202533	0.175866	0.195883	0.214482	0.45187	3.12442
Hex2Cer(d18_1_24_0	990.745	A	0.0258757	0.0248218	0.0257469	0.0262817	0.0234657	0.0239311	0.022043	0.0236466	0.0099522	0.00954686	0.00990265	0.0101084	0.0136428	0.0139135	0.0128157	0.013748	0.453535	5.13498
FA(20_4)	303.233	C	0.087852	0.0725792	0.0858346	0.0533842	0.0815357	0.0561373	0.0648361	0.067248	0.0337892	0.0279151	0.0330133	0.0205324	0.0474045	0.032638	0.0376954	0.0390977	0.458622	1.21405
CL(18_2_20_3_16_1_18_1)	1449.98	B	0.329039	0.322511	0.357748	0.313658	0.314824	0.266182	0.306676	0.316648	0.126553	0.124043	0.137595	0.120638	0.183037	0.154757	0.1783	0.184098	0.458806	3.16286
SM(d18_1_24_3)	809.653	B	0.0960446	0.0895835	0.1042	0.0957689	0.087918	0.0786118	0.0908682	0.0935805	0.0369402	0.0344552	0.0400768	0.0368342	0.0511151	0.0457045	0.0528304	0.0544073	0.459382	3.19508
PI(17_1_18_1)	847.534	A	0.213658	0.198756	0.256672	0.237228	0.236956	0.174196	0.205839	0.209259	0.0821762	0.0764446	0.09872	0.0912417	0.137765	0.101277	0.119674	0.121662	0.46101	2.03318
dMePE(16_0_16_1)	716.524	B	0.169934	0.158764	0.178794	0.155769	0.139003	0.153742	0.160665	0.153007	0.0653592	0.0610631	0.068767	0.0599111	0.0808156	0.0893848	0.0934101	0.0889578	0.467033	3.49056
PC(20_0_16_0)	848.639	A	0.0952314	0.0963969	0.0909618	0.0904033	0.0890579	0.0842682	0.0841901	0.0840524	0.0366275	0.0370757	0.0349853	0.0347705	0.0517778	0.0489931	0.0489477	0.0488677	0.469256	5.28651
DG(16_1e_18_1)	601.517	C	0.0632799	0.0584437	0.0659436	0.0635914	0.0591239	0.0513928	0.0610237	0.0604177	0.0243384	0.0224783	0.0253629	0.0244582	0.0343744	0.0298796	0.0354789	0.0351266	0.478801	3.37257
PG(8_0e_8_0)	507.269	C	1.84731	1.87447	1.81729	0.915062	1.17056	1.60709	1.42431	1.55341	0.710503	0.720949	0.698957	0.351947	0.680558	0.934356	0.828087	0.903145	0.479033	0.885533
SM(d18_1_18_3)	725.559	B	0.934486	0.87365	0.915286	0.924956	0.852871	0.894707	0.806447	0.814999	0.359418	0.336019	0.352033	0.355752	0.495855	0.520179	0.468864	0.473837	0.480425	4.66771
SM(d18_2_16_0)	759.566	C	0.658845	0.581648	0.669539	0.666546	0.626605	0.549035	0.587108	0.614549	0.253402	0.223711	0.257515	0.256364	0.364305	0.319206	0.341342	0.357296	0.480516	3.524
PE(18_0p_17_1)	716.559	B	0.133734	0.126923	0.145487	0.133484	0.127379	0.111594	0.131704	0.128077	0.0514362	0.0488167	0.0559566	0.0513399	0.0740574	0.0648804	0.0765724	0.0744634	0.481308	3.42578
CL(18_1_16_1_18_1_18_1)	1428	A	1.14105	1.13144	1.25618	1.05896	1.11122	0.877841	1.12299	1.14501	0.438867	0.435168	0.483146	0.407294	0.646058	0.510373	0.652902	0.665705	0.482769	2.45967
CL(18_2_16_1_16_1_16_1)	1369.92	A	0.0746153	0.0766426	0.0854231	0.07606	0.0757424	0.0659675	0.0733207	0.0741093	0.0286982	0.0294779	0.032855	0.0292538	0.0440363	0.0383532	0.0426283	0.0430868	0.48294	3.6074
PE(18_1e_18_2)	750.541	C	0.0898627	0.0996558	0.0956529	0.0935786	0.082936	0.0876288	0.0944213	0.0854963	0.0345626	0.0383291	0.0367896	0.0359918	0.0482186	0.050947	0.0548961	0.0497072	0.483531	4.12225
PG(18_0_18_2)	773.534	B	0.140032	0.149785	0.157347	0.150669	0.146674	0.11644	0.149678	0.142444	0.0538584	0.0576095	0.0605182	0.0579497	0.0852759	0.0676974	0.087022	0.0828163	0.483722	2.7583
PI(16_0_22_5)	902.575	B	0.289523	0.211044	0.252542	0.250424	0.245713	0.220661	0.21644	0.244272	0.111355	0.0811707	0.0971315	0.096317	0.142856	0.128291	0.125837	0.142019	0.488388	2.45595
TG(18_1_18_2_20_4)	905.759	A	0.482469	0.56573	0.534502	0.441492	0.43006	0.477789	0.492622	0.472044	0.185565	0.217588	0.205578	0.169805	0.250035	0.277784	0.286408	0.274444	0.488399	2.79415
SM(d18_1_22_1)	843.66	C	0.0653341	0.0585605	0.0615716	0.0629577	0.0573692	0.0523777	0.0617832	0.0593691	0.0251285	0.0225233	0.0236814	0.0242145	0.0333542	0.0304521	0.0359205	0.0345169	0.489039	3.71324
PC(18_1_18_1)	808.583	A	1.32886	1.31219	1.315	1.32625	1.19156	1.21954	1.31008	1.20851	0.511102	0.504687	0.505767	0.510096	0.692767	0.709034	0.761672	0.702625	0.495477	5.43341
PS(20_1_20_4)	860.541	C	0.0635236	0.0529491	0.0559072	0.0749067	0.0563186	0.0581944	0.0578703	0.0562515	0.0244322	0.020365	0.0215028	0.0288103	0.0327433	0.033834	0.0336456	0.0327044	0.495898	2.35304
DG(18_1_14_0)	584.525	A	0.883237	0.991678	1.09967	1.00858	0.860082	0.880993	1.01699	0.955275	0.339707	0.381415	0.422951	0.387915	0.500047	0.512205	0.591273	0.555392	0.496061	2.94167
DG(16_0_16_0)	586.54	A	2.86936	3.38268	3.4307	2.70651	2.43622	2.56792	3.22765	3.38396	1.1036	1.30103	1.3195	1.04097	1.41641	1.49298	1.87654	1.96742	0.496255	1.84278
PC(18_0_17_0)	834.623	A	0.299155	0.252123	0.288073	0.29099	0.267911	0.254534	0.257463	0.274449	0.11506	0.0969705	0.110797	0.111919	0.155762	0.147985	0.149688	0.159563	0.498125	3.75905
SM(t18_0_16_0)	779.592	C	0.153848	0.155696	0.170386	0.154417	0.162353	0.133109	0.155929	0.143194	0.0591725	0.0598831	0.0655332	0.0593912	0.0943912	0.077389	0.0906561	0.0832525	0.499783	3.32063
PE(18_0p_18_1)	730.574	B	0.676737	0.71091	0.709532	0.650192	0.676389	0.54702	0.716489	0.654868	0.260283	0.273427	0.272897	0.250074	0.393249	0.318035	0.416563	0.380737	0.507503	2.88866
TG(6_0_10_4_10_4)	483.274	A	0.0659872	0.0600291	0.0646048	0.063408	0.0533128	0.0625247	0.0626279	0.0608661	0.0253797	0.0230881	0.024848	0.0243877	0.0309958	0.0363516	0.0364116	0.0353873	0.507903	3.72822
SM(d14_0_21_4)	711.544	C	0.0417698	0.0337383	0.0325386	0.0384653	0.0355367	0.0348879	0.033317	0.0334754	0.0160653	0.0129763	0.0125148	0.0147944	0.0206609	0.0202837	0.0193703	0.0194624	0.508312	2.96421
MePC(15_0_16_1)	749.58	C	0.135719	0.123123	0.146686	0.13604	0.129678	0.105481	0.135141	0.141717	0.0521996	0.0473552	0.0564176	0.052323	0.0753942	0.0613261	0.0785706	0.0823939	0.509082	2.50039
PI(16_0_18_2)	857.515	C	0.387238	0.359376	0.38119	0.364244	0.350283	0.324394	0.380059	0.352037	0.148938	0.138222	0.146611	0.140094	0.203653	0.188601	0.220964	0.204673	0.509625	4.12661
MePC(16_1_19_0)	810.598	C	0.884458	0.829403	1.10893	1.11728	0.970745	0.79197	0.922475	1.01138	0.340176	0.319001	0.426511	0.429723	0.564387	0.460448	0.536322	0.588013	0.510709	2.03862
SM(d18_2_18_3)	723.544	B	0.108465	0.0984389	0.114259	0.119076	0.106116	0.0981648	0.105183	0.107002	0.0417175	0.0378611	0.0439456	0.0457986	0.0616951	0.0570726	0.061153	0.0622105	0.518786	3.65857
PC(16_0e_14_0)	750.565	A	0.239778	0.26951	0.248953	0.217707	0.239429	0.202697	0.243197	0.23984	0.0922223	0.103658	0.0957511	0.0837333	0.139203	0.117847	0.141394	0.139442	0.51931	2.94467
PC(17_0_18_1)	832.607	A	3.10992	2.91861	3.18745	3.05387	2.9665	2.87327	2.79808	3.00226	1.19612	1.12254	1.22594	1.17457	1.72471	1.6705	1.62679	1.7455	0.520287	5.21027
PI(16_1_18_1)	833.519	A	2.75557	2.61583	2.97482	2.92341	2.67347	2.31377	2.88857	2.84455	1.05983	1.00609	1.14416	1.12439	1.55434	1.34521	1.6794	1.65381	0.520462	3.07951
CL(18_1_16_0_16_1_16_0)	1375.96	A	0.101967	0.109843	0.122418	0.0908602	0.0996605	0.0811181	0.114646	0.109783	0.0392182	0.0422474	0.0470839	0.0349462	0.0579421	0.0471617	0.0666549	0.0638271	0.523088	1.97095
PI(16_1_18_2)	831.503	A	0.0402699	0.0437887	0.0473723	0.0455126	0.0414461	0.0362568	0.0470935	0.0438899	0.0154884	0.0168418	0.0182201	0.0175049	0.0240966	0.0210796	0.02738	0.0255174	0.523188	2.83941
TG(16_0_16_1_22_6)	877.728	A	0.338102	0.4156	0.368845	0.308499	0.302582	0.33328	0.38214	0.340883	0.130039	0.159846	0.141864	0.118653	0.17592	0.193767	0.222174	0.198188	0.52523	2.4217
PE(22_1_20_4)	822.601	B	0.0928028	0.0811972	0.0971647	0.0912227	0.0933738	0.0742444	0.0931965	0.0853665	0.0356934	0.0312297	0.037371	0.0350856	0.0542871	0.0431654	0.054184	0.0496317	0.527059	2.83174
CL(17_1_18_1_16_1_18_1)	1413.98	A	0.155022	0.146948	0.163657	0.152815	0.153013	0.126826	0.154149	0.157826	0.0596238	0.0565183	0.0629448	0.058775	0.0889613	0.0737363	0.0896216	0.0917591	0.528338	3.24534
TG(18_1_22_3_22_3)	1006.88	A	0.0648961	0.0899461	0.0751621	0.0559639	0.0625572	0.060422	0.0753849	0.0716691	0.02496	0.0345946	0.0289085	0.0215246	0.0363704	0.0351291	0.0438284	0.0416681	0.529648	1.73356
CL(14_0_18_1_16_1_18_1)	1373.95	A	0.330985	0.355353	0.359215	0.311922	0.335741	0.267499	0.34431	0.355067	0.127302	0.136674	0.13816	0.11997	0.195198	0.155522	0.20018	0.206434	0.530261	2.63924
PC(16_0_19_0)	776.616	C	0.356894	0.332615	0.384739	0.366654	0.348578	0.307454	0.371493	0.351035	0.137267	0.127929	0.147976	0.141021	0.202661	0.178752	0.215984	0.20409	0.530892	3.48409
PC(18_0_19_0)	862.654	C	0.0523068	0.0621569	0.046834	0.0561657	0.0517448	0.0513458	0.0500653	0.0537256	0.020118	0.0239065	0.0180131	0.0216022	0.0300842	0.0298522	0.0291077	0.0312358	0.531333	3.01675
DG(6_0_10_4)	337.201	C	0.00750233	0.00726606	0.00750227	0.00756114	0.00656411	0.00827818	0.00683985	0.00695986	0.00288551	0.00279464	0.00288549	0.00290813	0.00381634	0.0048129	0.00397666	0.00404643	0.531726	3.40502
TG(16_1_18_2_20_5)	875.712	A	0.0819272	0.100174	0.087928	0.0732817	0.0730313	0.0795804	0.0874448	0.0878948	0.0315105	0.0385284	0.0338185	0.0281853	0.0424601	0.0462677	0.05084	0.0511016	0.535235	2.4794
SM(d14_0_20_4)	697.528	C	0.0642499	0.0584492	0.0662648	0.0621004	0.0601138	0.0561579	0.0628633	0.0615125	0.0247115	0.0224804	0.0254865	0.0238848	0.0349499	0.03265	0.0365484	0.0357631	0.535243	4.28922
SM(d18_1_24_2)	869.675	C	0.0756753	0.0646771	0.0713089	0.0778765	0.0688232	0.0644917	0.0745721	0.0695056	0.0291059	0.0248758	0.0274265	0.0299525	0.0400135	0.0374952	0.0433559	0.0404102	0.535959	3.48304
DG(17_1_18_1)	624.556	B	0.260936	0.281923	0.300249	0.271096	0.241931	0.260608	0.274507	0.292851	0.10036	0.108432	0.11548	0.104268	0.140658	0.151517	0.159597	0.170262	0.535986	3.49941
PC(12_0e_16_0)	722.534	B	0.0178533	0.0156113	0.0187819	0.0182195	0.0165001	0.0168142	0.0170125	0.0171393	0.00686667	0.00600434	0.00722382	0.00700749	0.00959305	0.00977569	0.009891	0.00996473	0.536715	3.95911
LPE(15_0)	438.263	A	0.0718584	0.0765117	0.0728782	0.0698036	0.0732519	0.0651433	0.0710534	0.0701245	0.0276379	0.0294276	0.0280301	0.0268475	0.0425883	0.037874	0.0413101	0.0407701	0.537523	4.66314
TG(6_0_10_3_10_4)	502.316	A	4.46829	4.3292	4.32212	4.2167	3.81262	4.50212	4.18237	4.24187	1.71857	1.66508	1.66235	1.62181	2.21664	2.61751	2.43161	2.46621	0.543286	4.32285
PE(18_0_22_3)	798.601	A	1.37767	1.39054	1.42449	1.20337	1.36442	1.16812	1.38678	1.29395	0.529872	0.534822	0.547882	0.462833	0.793268	0.679141	0.806268	0.752299	0.546256	3.36553
PG(18_1_18_2)	795.515	A	0.012586	0.016663	0.0158309	0.0122959	0.0152851	0.0113179	0.01597	0.0129536	0.00484077	0.00640885	0.00608882	0.0047292	0.0088867	0.00658019	0.00928486	0.00753115	0.548616	1.85326
PG(16_0_14_0)	693.471	B	0.0730329	0.0705365	0.0954613	0.0715918	0.0805788	0.0518113	0.0921601	0.0807114	0.0280896	0.0271294	0.0367159	0.0275353	0.0468481	0.0301228	0.0535815	0.0469252	0.550841	1.412
FA 18_4	275.202	D	0.000473303	0.000339379	0.000376526	0.000782978	0.000465403	0.0005333	0.000380496	0.000442897	0.00018204	0.00013053	0.000144818	0.000301146	0.000270583	0.000310058	0.000221218	0.000257498	0.551325	0.987993
PC(17_0_20_4)	796.585	C	0.155929	0.165401	0.180628	0.167603	0.163301	0.164486	0.175667	0.14832	0.0599727	0.0636156	0.0694723	0.0644628	0.0949426	0.0956315	0.102132	0.0862323	0.556635	3.79904
PE(18_1_20_4)	766.538	A	3.30594	2.79976	3.15181	3.44869	3.03125	2.77231	3.35181	3.20248	1.27152	1.07683	1.21223	1.32642	1.76236	1.61181	1.94873	1.86191	0.556738	3.14568
PI(18_0e_22_5)	897.586	B	0.00585747	0.00374895	0.00492617	0.00721885	0.00554711	0.00555344	0.00370471	0.00614208	0.00225287	0.0014419	0.00189468	0.00277648	0.00322506	0.00322874	0.0021539	0.00357098	0.557155	1.13402
DG(16_1e_16_0)	575.501	C	0.242535	0.226058	0.265407	0.232536	0.228351	0.213164	0.246556	0.253325	0.0932825	0.0869455	0.10208	0.089437	0.132762	0.123933	0.143347	0.147282	0.557496	3.49499
Hex1Cer(t18_0_24_0)	830.708	A	0.0632442	0.0661469	0.0658671	0.0597304	0.0589225	0.0600908	0.0677222	0.0619754	0.0243247	0.0254411	0.0253335	0.0229732	0.0342573	0.0349365	0.0393734	0.0360322	0.559268	4.23347
LPC(28_0)	664.528	B	0.0535478	0.0526408	0.0616248	0.0600582	0.0564853	0.0463609	0.0578455	0.0621918	0.0205953	0.0202465	0.0237018	0.0230993	0.0328403	0.026954	0.0336311	0.036158	0.559312	2.70139
Hex1Cer(t16_0_26_2)	884.683	C	0.0222012	0.0211492	0.0237121	0.0204235	0.0212647	0.0193167	0.0226967	0.0220303	0.00853894	0.00813431	0.00912003	0.00785518	0.0123632	0.0112306	0.0131958	0.0128083	0.5594	3.7308
PE(16_1e_22_2)	754.576	A	0.352599	0.383522	0.392014	0.35675	0.38667	0.306514	0.399646	0.360684	0.135615	0.147509	0.150775	0.137211	0.224808	0.178206	0.232352	0.2097	0.559442	3.01663
SM(d20_0_24_6)	833.653	C	0.0140931	0.0132196	0.0185709	0.0184701	0.0137194	0.0168149	0.0165028	0.0152433	0.00542041	0.00508445	0.00714266	0.00710388	0.00797638	0.00977611	0.00959467	0.00886237	0.561339	2.08574
PC(16_0_22_0)	818.663	C	0.898043	0.903206	0.877496	0.925078	0.881637	0.871339	0.933703	0.848516	0.345401	0.347387	0.337499	0.355799	0.51258	0.506592	0.542851	0.493323	0.567732	5.60425
PE(16_1_16_1)	686.477	A	0.142667	0.158436	0.170674	0.154253	0.130827	0.137749	0.168999	0.182485	0.054872	0.060937	0.0656438	0.0593281	0.0760622	0.0800866	0.0982552	0.106096	0.571451	2.38808
LPE(16_1)	450.263	B	0.0569621	0.0568103	0.0560883	0.0439203	0.0596752	0.0416634	0.0597248	0.0503086	0.0219085	0.0218501	0.0215724	0.0168924	0.0346949	0.0242229	0.0347237	0.0292492	0.57268	2.00573
PE(20_1e_18_1)	756.591	A	0.143711	0.146048	0.16427	0.161151	0.163065	0.131788	0.157488	0.154063	0.0552734	0.0561723	0.0631808	0.0619812	0.0948054	0.0766211	0.0915631	0.0895718	0.57319	3.32184
DG(18_3e_16_1)	575.503	C	0.242535	0.226058	0.265407	0.239579	0.231971	0.218088	0.256863	0.253745	0.0932825	0.0869455	0.10208	0.0921458	0.134867	0.126795	0.149339	0.147526	0.576013	3.63856
Hex1Cer(m22_1_18_1)	824.662	B	0.00770161	0.00857639	0.00868895	0.00867161	0.00846199	0.00717715	0.00916286	0.0084729	0.00296216	0.00329861	0.0033419	0.00333524	0.00491976	0.00417276	0.00532724	0.0049261	0.576616	3.29481
Cer(t20_0_23_3)	658.613	B	0.860407	0.841283	0.845348	0.847201	0.8212	0.852015	0.838644	0.837818	0.330926	0.32357	0.325134	0.325846	0.477442	0.495358	0.487584	0.487103	0.576965	8.06755
PC(23_0_23_0)	988.795	A	0.0700503	0.0666674	0.0692228	0.0677488	0.0728393	0.0647555	0.0661467	0.0668153	0.0269424	0.0256413	0.0266242	0.0260572	0.0423484	0.0376486	0.0384574	0.0388461	0.578291	5.12758
CL(20_4_16_0_16_1_18_1)	1423.96	B	0.0914289	0.100795	0.104283	0.0775286	0.0958183	0.0830954	0.0943812	0.0945307	0.035165	0.0387672	0.0401089	0.0298187	0.0557083	0.0483113	0.0548728	0.0549597	0.578901	2.77701
CL(17_1_16_1_18_1_16_1)	1385.95	A	0.106931	0.0955862	0.113969	0.0994383	0.109114	0.0889275	0.100819	0.112961	0.0411273	0.0367639	0.0438343	0.0382455	0.0634384	0.051702	0.0586157	0.0656752	0.57912	3.05134
PI(18_1_20_2)	887.566	A	2.91895	3.05242	3.3764	3.25165	3.25083	2.95672	2.98749	3.25952	1.12267	1.17401	1.29862	1.25063	1.89002	1.71902	1.73691	1.89507	0.580186	4.14293
PC(18_0_18_0)	848.639	A	0.0615322	0.0569233	0.0657867	0.0603723	0.0587028	0.062603	0.0605517	0.0600679	0.0236662	0.0218936	0.0253026	0.0232201	0.0341295	0.0363971	0.0352045	0.0349232	0.581699	4.76421
PE(16_0_22_5)	764.524	A	0.212225	0.199833	0.232122	0.271729	0.246333	0.227268	0.212453	0.217118	0.0816252	0.0768589	0.0892775	0.104511	0.143217	0.132133	0.123519	0.126231	0.5834	2.79262
LPC(18_1)	580.362	A	0.247857	0.237663	0.282221	0.241415	0.268484	0.202661	0.247164	0.289318	0.0953297	0.091409	0.108546	0.0928519	0.156096	0.117826	0.1437	0.168208	0.584919	2.4817
Hex1Cer(t16_0_26_0)	888.715	C	0.0225679	0.0250523	0.0241518	0.0215065	0.0235412	0.0197924	0.0250608	0.0243823	0.00867998	0.00963549	0.00928914	0.00827172	0.0136867	0.0115072	0.0145702	0.0141757	0.584922	3.17314
PC(19_0_18_2)	800.616	C	0.886616	0.834944	0.949599	0.905653	0.920291	0.756765	0.971562	0.912479	0.341006	0.321132	0.36523	0.348328	0.535053	0.43998	0.564861	0.530511	0.585045	3.2638
PE(18_1_24_0)	828.649	A	0.0375641	0.0410579	0.0442405	0.0383245	0.0425138	0.036762	0.040781	0.0401593	0.0144477	0.0157915	0.0170156	0.0147402	0.0247173	0.0213732	0.0237099	0.0233484	0.588384	3.83365
PC(18_0_18_2)	786.601	C	30.8099	30.3071	33.0782	30.843	31.7112	26.5026	34.877	31.8789	11.85	11.6566	12.7224	11.8627	18.4367	15.4085	20.2773	18.5342	0.589137	3.27872
PS(18_1_20_4)	808.513	A	0.0724334	0.0733549	0.0861327	0.0902215	0.0760882	0.070873	0.0862355	0.0871588	0.027859	0.0282134	0.0331279	0.0347006	0.0442373	0.0412052	0.0501369	0.0506737	0.589418	2.79943
PC(17_1_20_4)	794.569	C	0.073687	0.095078	0.0886006	0.106221	0.068492	0.109273	0.0860723	0.100682	0.0283411	0.0365685	0.0340772	0.040854	0.039821	0.0635311	0.050042	0.0585363	0.59017	1.72438
SM(d18_0_16_0)	705.591	C	1.52397	1.57893	1.72532	1.49097	1.55624	1.3223	1.76908	1.69376	0.586143	0.607281	0.663585	0.573448	0.904792	0.768781	1.02854	0.984744	0.594717	2.9149
PC(18_0_20_0)	876.67	A	1.2265	1.2265	1.2265	1.2265	1.2265	1.2265	1.2265	1.2265	0.471731	0.471731	0.471731	0.471731	0.713081	0.713081	0.713081	0.713081	0.596103	0
PE(18_0_16_0)	718.539	A	0.7195	0.7195	0.7195	0.7195	0.7195	0.7195	0.7195	0.7195	0.276731	0.276731	0.276731	0.276731	0.418314	0.418314	0.418314	0.418314	0.596103	0
MePC(16_1e_20_4)	802.572	C	0.0721821	0.0677462	0.0723596	0.0700535	0.0733843	0.062775	0.0693321	0.0777415	0.0277623	0.0260562	0.0278306	0.0269437	0.0426653	0.0364971	0.0403094	0.0451986	0.596715	3.8662
TG(18_3e_18_1_18_1)	867.78	A	0.0960685	0.124045	0.109878	0.0886028	0.0924394	0.101405	0.117109	0.106476	0.0369494	0.0477095	0.0422608	0.034078	0.0537438	0.0589566	0.0680867	0.0619049	0.598797	2.45988
LdMePE(19_0)	522.357	B	0.0796863	0.0713754	0.0861431	0.0783198	0.074976	0.0781158	0.0865362	0.0775869	0.0306486	0.0274521	0.033132	0.030123	0.0435907	0.0454162	0.0503117	0.0451087	0.604926	3.83194
Hex1Cer(d18_1_18_0)	786.61	C	0.00231522	0.00220236	0.00192513	0.00190845	0.0021707	0.00229665	0.00190743	0.00202004	0.000890471	0.000847062	0.000740434	0.00073402	0.00126204	0.00133526	0.00110897	0.00117444	0.605142	3.24734
PE(18_0p_22_4)	780.59	B	0.362558	0.349716	0.378362	0.362195	0.361256	0.335052	0.396034	0.373307	0.139446	0.134506	0.145524	0.139306	0.210033	0.194798	0.230252	0.217039	0.606719	4.46302
SM(d20_0_18_0)	761.653	C	0.027101	0.0258856	0.0334059	0.026202	0.0263819	0.0246372	0.0322687	0.0301698	0.0104235	0.009956	0.0128484	0.0100777	0.0153383	0.014324	0.0187609	0.0175406	0.606941	2.56997
DG(16_0_17_0)	600.556	B	0.427152	0.456131	0.461123	0.430011	0.422701	0.417013	0.47232	0.479293	0.164289	0.175435	0.177355	0.165389	0.245756	0.242449	0.274604	0.278659	0.607773	4.28331
TG(18_3_18_3_22_5)	925.728	A	0.01887	0.020296	0.02253	0.0171898	0.01755	0.0194023	0.0214764	0.0209656	0.00725768	0.00780615	0.0086654	0.00661146	0.0102035	0.0112804	0.0124863	0.0121893	0.608049	2.92543
Cer(d16_1_24_0)	680.62	A	0.197405	0.199317	0.192653	0.196344	0.194857	0.207281	0.191294	0.199194	0.0759251	0.0766605	0.0740974	0.075517	0.113289	0.120512	0.111217	0.11581	0.608191	6.30353
SPH(t18_0)	318.3	C	0.143122	0.149608	0.148161	0.136471	0.138275	0.153665	0.137315	0.153536	0.055047	0.0575415	0.056985	0.0524889	0.0803926	0.0893402	0.0798343	0.089265	0.608404	4.52045
PC(22_0_24_0)	930.788	C	0.0319981	0.0362011	0.0328584	0.0341289	0.0353168	0.0288525	0.0373341	0.0356186	0.0123069	0.0139235	0.0126379	0.0131265	0.020533	0.0167747	0.0217059	0.0207085	0.611328	3.27387
Cer(d16_0_19_1)	610.542	B	0.4033	0.392703	0.395946	0.396384	0.413578	0.410664	0.380152	0.402013	0.155115	0.151039	0.152287	0.152455	0.240452	0.238758	0.221019	0.233728	0.611714	6.15742
SM(d14_0_18_4)	669.497	C	0.319973	0.32297	0.317251	0.313138	0.321664	0.322486	0.322158	0.323687	0.123067	0.124219	0.12202	0.120438	0.187014	0.187492	0.187301	0.18819	0.61495	8.99266
Cer(d18_1_23_0)	634.614	A	0.101637	0.101861	0.103415	0.102542	0.102019	0.107647	0.103805	0.103554	0.0390911	0.0391773	0.0397748	0.0394392	0.0593131	0.0625857	0.060352	0.0602061	0.622288	7.49931
Hex1Cer(d18_1_22_0	800.661	A	0.0642417	0.0746798	0.0759039	0.0816793	0.0755832	0.0673355	0.0791557	0.0796396	0.0247083	0.028723	0.0291938	0.0314151	0.0439437	0.0391486	0.0460208	0.0463021	0.623413	3.30158
PI(18_0_16_0)	837.55	A	0.290341	0.288894	0.313596	0.338516	0.292753	0.297443	0.331198	0.333449	0.11167	0.111113	0.120614	0.130199	0.170205	0.172932	0.192557	0.193866	0.623862	3.83748
SM(t18_1_24_0)	831.695	C	0.0687111	0.0708977	0.0798271	0.0659682	0.0779719	0.0577361	0.0797387	0.0773302	0.0264273	0.0272684	0.0307027	0.0253724	0.0453325	0.0335675	0.0463597	0.0449594	0.624555	2.6034
PG(18_1_20_2)	799.549	B	0.349239	0.382902	0.434691	0.366922	0.404364	0.310969	0.441484	0.418443	0.134323	0.14727	0.167189	0.141124	0.235095	0.180796	0.256677	0.243281	0.626895	2.51269
Cer(d18_1_17_0)	550.52	A	0.036213	0.0346319	0.0350916	0.0368766	0.0357352	0.0371523	0.035647	0.0373979	0.0139281	0.01332	0.0134968	0.0141833	0.0207763	0.0216002	0.020725	0.021743	0.627377	6.3262
PE(18_1e_22_2)	782.607	C	0.110525	0.103089	0.12222	0.115345	0.129009	0.0949683	0.125005	0.114919	0.0425095	0.0396495	0.0470075	0.0443633	0.0750051	0.0552141	0.0726771	0.0668132	0.629078	2.86801
Co(Q10)	880.718	A	0.540323	0.527522	0.570805	0.503658	0.524849	0.490652	0.599975	0.581768	0.207817	0.202893	0.21954	0.193715	0.305145	0.285263	0.348822	0.338237	0.629466	3.75011
PE(8_1e_8_0)	452.277	C	0.0301838	0.0273959	0.0295934	0.0229305	0.0304643	0.0236856	0.0321793	0.0267877	0.0116091	0.0105369	0.0113821	0.00881943	0.0177118	0.0137707	0.0187089	0.0155743	0.633243	2.49093
SPH(t16_0)	290.269	C	0.353453	0.344551	0.341603	0.332051	0.33481	0.375554	0.340761	0.357484	0.135943	0.13252	0.131386	0.127712	0.194657	0.218345	0.198117	0.20784	0.633362	5.29454
DG(15_0_18_1)	598.54	B	0.64136	0.645338	0.706385	0.684912	0.6253	0.686398	0.726811	0.713246	0.246677	0.248207	0.271686	0.263428	0.363547	0.399069	0.422564	0.414678	0.634106	4.41934
PE(18_0_22_4)	796.585	A	1.97938	1.98105	2.09163	1.98153	2.09618	1.81181	2.36819	2.0153	0.761301	0.761944	0.804473	0.762129	1.21871	1.05338	1.37685	1.17169	0.635456	3.61022
PE(18_0_22_6)	790.539	A	2.60766	2.23906	2.78672	3.0129	2.67634	2.64483	2.71147	2.86166	1.00295	0.861177	1.07181	1.15881	1.55601	1.53769	1.57643	1.66376	0.637102	3.28969
PE(18_1_20_5)	762.508	A	0.734537	0.638297	0.742243	0.901114	0.7941	0.687784	0.809375	0.805298	0.282514	0.245499	0.285478	0.346582	0.461686	0.399875	0.470567	0.468197	0.641839	2.82156
PC(16_0_18_1)	818.592	A	34.1791	33.4271	34.784	33.1845	35.1863	34.308	33.95	36.8927	13.1458	12.8566	13.3785	12.7633	20.4571	19.9465	19.7384	21.4492	0.645411	6.10764
PE(8_0e_14_4)	530.324	C	0.0165126	0.0125678	0.0138871	0.0115519	0.0161174	0.0123996	0.0149181	0.0128589	0.00635101	0.00483378	0.00534118	0.00444305	0.00937057	0.00720907	0.00867333	0.00747609	0.646992	2.4095
TG(19_0_18_1_22_5)	966.848	A	0.0379885	0.0483543	0.0423748	0.0297272	0.0424806	0.0335865	0.0454469	0.0414236	0.014611	0.0185978	0.016298	0.0114336	0.024698	0.019527	0.0264226	0.0240835	0.649883	1.9922
CL(18_1_16_1_16_1_18_1)	1399.96	A	1.54737	1.58763	1.65145	1.48122	1.69105	1.39051	1.68879	1.76405	0.595144	0.610626	0.635173	0.569699	0.983166	0.808433	0.981856	1.02561	0.651402	3.62663
PG(8_0e_10_3)	507.272	C	1.04042	1.00155	0.960148	0.967722	1.02229	1.02364	1.07651	1.003	0.400162	0.38521	0.369288	0.372201	0.594354	0.595138	0.625877	0.583138	0.651802	5.86122
PC(16_1_19_0)	774.601	C	4.64028	4.46238	5.0085	4.78203	4.99194	4.24656	5.41235	5.07837	1.78472	1.7163	1.92635	1.83924	2.90229	2.46893	3.14671	2.95254	0.654225	3.67464
SM(d18_0_22_0)	847.691	C	0.0249546	0.0214467	0.0287518	0.0195025	0.0240471	0.0214731	0.0278271	0.0247695	0.00959794	0.00824874	0.0110584	0.00750096	0.0139809	0.0124843	0.0161785	0.0144009	0.657619	2.40165
Cer(t18_0_17_0)	534.524	C	0.0947059	0.0934135	0.103004	0.102384	0.0970493	0.108767	0.101443	0.10351	0.0364253	0.0359283	0.039617	0.0393785	0.056424	0.0632365	0.0589787	0.0601803	0.658241	4.9153
TG(20_1_18_1_22_5)	978.848	A	0.11893	0.153771	0.135328	0.1026	0.128728	0.112735	0.144345	0.145491	0.0457425	0.0591426	0.0520494	0.0394617	0.0748419	0.0655436	0.0839214	0.0845878	0.66193	2.31842
PE(18_1_22_3)	794.571	A	1.65729	1.6315	1.82865	1.71359	1.84664	1.62221	1.85025	1.83875	0.637419	0.627501	0.703327	0.659072	1.07363	0.943143	1.07573	1.06904	0.662725	4.52242
Cer(d17_1_17_0)	596.526	A	0.0521325	0.0473185	0.0463039	0.0477558	0.0508036	0.0593375	0.0470593	0.0466965	0.0200509	0.0181994	0.0178092	0.0183676	0.029537	0.0344986	0.0273601	0.0271491	0.666172	3.5435
SPH(t20_0)	346.332	C	0.0552314	0.0514815	0.051303	0.0489223	0.0533748	0.05679	0.0530173	0.0547597	0.0212428	0.0198006	0.0197319	0.0188163	0.0310319	0.0330174	0.030824	0.0318371	0.671678	5.39166
Cer(t17_0_25_0)	726.662	A	0.0073309	0.00799066	0.00691313	0.00514621	0.00762575	0.00705528	0.00754119	0.00637241	0.00281958	0.00307333	0.0026589	0.00197931	0.00443357	0.00410191	0.00438441	0.00370489	0.673867	2.38238
PS(18_1_22_5)	836.544	A	0	0.014854	0.0437494	0.0466373	0.0338056	0.0278984	0.0367914	0.0338334	0	0.00571307	0.0168267	0.0179374	0.0196544	0.01622	0.0213904	0.0196706	0.674386	0.695158
PC(16_1e_14_0)	748.55	B	0.0595167	0.0537934	0.0567189	0.0522	0.0582904	0.0596314	0.0542466	0.0624665	0.022891	0.0206898	0.021815	0.0200769	0.0338898	0.0346694	0.0315387	0.0363177	0.674438	4.54625
MePC(15_0_18_1)	777.612	C	0.0687388	0.0699532	0.0805232	0.0761859	0.0794528	0.064098	0.0782628	0.092121	0.026438	0.0269051	0.0309705	0.0293023	0.0461935	0.0372663	0.0455016	0.0535587	0.675051	2.86929
PC(18_0_16_0)	820.607	A	1.07719	1.00102	1.01897	0.945202	1.02326	1.07523	1.08276	1.08564	0.414305	0.385006	0.391913	0.363539	0.594917	0.625136	0.62951	0.631184	0.675231	5.33087
Cer(d18_1_24_0)	650.645	B	0.0820326	0.0803054	0.082803	0.067237	0.0862911	0.0732501	0.0827709	0.0875194	0.031551	0.0308867	0.0318473	0.0258604	0.0501692	0.0425873	0.0481226	0.0508834	0.676137	3.49298
DG(16_0_18_1)	612.556	A	9.57612	10.2074	10.7699	9.69111	10.2285	10.139	11.3484	10.9397	3.68312	3.92591	4.14228	3.72735	5.94683	5.89477	6.5979	6.36028	0.680029	4.76433
CL(14_0_16_1_18_1_16_1)	1345.92	A	0.174701	0.18716	0.202562	0.161225	0.194314	0.168907	0.201106	0.204604	0.0671927	0.0719848	0.0779085	0.0620096	0.112973	0.0982015	0.116922	0.118956	0.680804	3.4485
LPI(18_0)	599.32	A	0.0790092	0.0708263	0.0689391	0.0553509	0.0757431	0.0624907	0.0797214	0.0719375	0.0303882	0.0272409	0.026515	0.0212888	0.0440367	0.0363318	0.0463496	0.0418241	0.682661	2.69198
TG(16_0e_16_0_22_3)	888.838	B	0.0928568	0.139406	0.114083	0.0789368	0.0987666	0.0940361	0.140627	0.115476	0.0357141	0.0536178	0.043878	0.0303603	0.0574224	0.0546721	0.0817599	0.0671374	0.68901	1.68406
FA 25_0	381.374	D	0.0022662	0.00383749	0.00444925	0.00309726	0.00324706	0.00345936	0.0042173	0.00327701	0.000871614	0.00147596	0.00171125	0.00119125	0.00188782	0.00201126	0.00245192	0.00190524	0.689441	1.62697
PE(18_0_24_1)	830.663	C	0.0263019	0.0283745	0.0263821	0.0237656	0.0300427	0.0249231	0.0269784	0.0302185	0.0101161	0.0109133	0.010147	0.00914062	0.0174667	0.0144902	0.0156851	0.0175689	0.691986	3.73494
Hex2Cer(d19_2_23_0	988.73	C	0.0198971	0.0194305	0.0168696	0.016584	0.0197957	0.0156559	0.0190903	0.0238512	0.00765275	0.00747327	0.0064883	0.00637847	0.0115091	0.00910229	0.011099	0.013867	0.692028	2.55856
PE(18_1_18_2)	742.538	A	1.46475	1.4378	1.57176	1.4817	1.57617	1.38587	1.80484	1.62591	0.563365	0.553001	0.604525	0.569885	0.916376	0.805737	1.04933	0.945298	0.692647	3.78626
Hex2Cer(t18_0_16_0)	880.636	A	0.0256359	0.0240697	0.0261468	0.0204195	0.0260005	0.0208211	0.0291954	0.0272643	0.00985996	0.00925756	0.0100565	0.00785366	0.0151166	0.0121053	0.0169741	0.0158514	0.692947	2.70031
TG(18_4_16_0_22_5)	901.728	A	0.0808189	0.0932826	0.0852836	0.082082	0.0834495	0.0915387	0.0909467	0.0994789	0.0310842	0.0358779	0.0328014	0.03157	0.0485172	0.0532202	0.052876	0.0578366	0.693369	4.23127
TG(18_1e_14_0_16_1)	806.76	B	0.100083	0.155034	0.131275	0.0814096	0.0996432	0.117609	0.157004	0.118127	0.0384933	0.0596284	0.0504902	0.0313114	0.0579321	0.0683772	0.0912813	0.0686784	0.693688	1.51159
SM(d18_1_24_1)	813.684	C	1.42254	1.40261	1.4926	1.41644	1.58556	1.3109	1.68428	1.59841	0.547131	0.539466	0.574079	0.544785	0.921835	0.762152	0.97923	0.92931	0.698011	3.85015
dMePE(18_1_18_1)	770.571	B	0.0358094	0.034605	0.0394296	0.0360966	0.042212	0.0297533	0.0424752	0.0444272	0.0137729	0.0133096	0.0151652	0.0138833	0.0245419	0.0172984	0.0246949	0.0258298	0.70268	2.6197
PS(18_0_20_5)	832.51	B	0.00515981	0.00607629	0.00554538	0.00708406	0.00753656	0.00280194	0.00970301	0.00812551	0.00198454	0.00233703	0.00213284	0.00272464	0.00438172	0.00162903	0.00564128	0.00472413	0.704816	0.851623
PE(19_0_20_4)	782.569	B	0.164245	0.140535	0.148042	0.158904	0.169684	0.146531	0.171907	0.172167	0.0631712	0.0540518	0.0569393	0.0611168	0.0986536	0.0851923	0.099946	0.100097	0.705743	4.06179
dMePE(16_0_18_1)	744.555	B	0.0888728	0.0966934	0.115096	0.0907007	0.103854	0.105304	0.101549	0.109675	0.0341818	0.0371898	0.0442676	0.0348849	0.0603805	0.0612232	0.0590403	0.0637643	0.706406	3.70285
PE(18_0_24_2)	828.648	C	0.0661496	0.065212	0.0690434	0.0561928	0.0745245	0.0559698	0.0818788	0.0666006	0.0254421	0.0250815	0.0265551	0.0216126	0.0433282	0.0325406	0.0476039	0.0387213	0.70676	2.71773
PE(18_1_24_1)	826.633	A	0.0724064	0.0856863	0.0812834	0.0711218	0.0873966	0.0724585	0.0931556	0.082994	0.0278486	0.0329563	0.0312628	0.0273546	0.050812	0.042127	0.0541602	0.0482524	0.708339	3.38313
TG(16_0e_16_0_18_4)	813.733	A	0.0761602	0.10675	0.0839807	0.0621685	0.0656976	0.0927644	0.101131	0.0947144	0.0292924	0.0410579	0.0323003	0.023911	0.0381963	0.0539328	0.0587973	0.0550665	0.711028	1.79712
TG(18_3e_16_0_16_1)	813.733	A	0.0761602	0.10675	0.0839807	0.0621685	0.0656976	0.0927644	0.101131	0.0947144	0.0292924	0.0410579	0.0323003	0.023911	0.0381963	0.0539328	0.0587973	0.0550665	0.711028	1.79712
PC(15_0_18_1)	804.576	A	5.23218	4.95254	5.28998	5.15875	5.65458	5.53081	5.58112	5.57391	2.01238	1.90482	2.03461	1.98413	3.28754	3.21559	3.24484	3.24064	0.711175	7.25485
Hex1Cer(d18_1_24_0)	812.697	A	0.096553	0.0899638	0.100657	0.0988208	0.0999881	0.0965155	0.110737	0.112359	0.0371358	0.0346015	0.0387144	0.038008	0.0581326	0.0561136	0.0643819	0.0653247	0.714792	4.48524
SM(d20_0_24_5)	835.669	C	0.311107	0.292913	0.327096	0.309756	0.345557	0.29319	0.362999	0.352276	0.119657	0.112659	0.125806	0.119137	0.200905	0.170459	0.211046	0.204811	0.718278	4.08619
PC(8_0e_19_0)	650.512	C	0.0207975	0.0160958	0.0197902	0.0211484	0.0229835	0.0164132	0.0253733	0.0207821	0.00799903	0.00619069	0.00761162	0.00813401	0.0133625	0.00954254	0.0147519	0.0120826	0.722523	2.36243
FA 18_0	283.264	D	2.5944	2.52501	2.33113	2.226	2.43876	2.8691	2.60657	2.66145	0.997847	0.971159	0.896588	0.856152	1.41788	1.66808	1.51545	1.54735	0.724587	4.31408
DG(17_0_18_1)	626.572	B	0.575704	0.650076	0.669172	0.6485	0.688526	0.593	0.818635	0.712341	0.221425	0.250029	0.257374	0.249423	0.400306	0.344767	0.47595	0.414152	0.734081	3.32707
PE(18_1_22_5)	792.554	A	0.615362	0.368779	0.369675	0.469722	0.495236	0.434991	0.541888	0.496015	0.236678	0.141838	0.142183	0.180662	0.287928	0.252902	0.315051	0.288381	0.734909	2.10974
TG(18_1_14_1_20_5)	849.697	A	0.100012	0.135727	0.117169	0.0915304	0.102905	0.11426	0.13548	0.135584	0.038466	0.0522025	0.0450649	0.035204	0.0598284	0.0664302	0.0787677	0.0788279	0.738382	2.44928
TG(17_0_18_1_22_4)	940.833	A	0.123587	0.151444	0.147528	0.110189	0.141708	0.130712	0.165784	0.147406	0.0475333	0.0582478	0.0567416	0.0423804	0.0823886	0.0759954	0.0963861	0.085701	0.739387	2.89312
PC(15_0_22_6)	792.554	C	1.72243	1.7	1.96733	2.00568	2.04945	1.87561	2.0679	2.16394	0.662473	0.653846	0.756666	0.771415	1.19154	1.09047	1.20227	1.2581	0.73963	4.17191
PS(18_0_22_6)	836.544	A	0.565803	0.443409	0.513474	0.582732	0.584543	0.529444	0.613249	0.601554	0.217617	0.170542	0.19749	0.224128	0.339851	0.307816	0.35654	0.349741	0.747326	3.51557
PC(19_1_18_1)	858.623	A	0.775553	0.711822	0.784791	0.772358	0.868744	0.806864	0.82597	0.879286	0.29829	0.273778	0.301843	0.297061	0.505084	0.469107	0.480215	0.511213	0.747442	5.59494
Hex2Cer(d18_1_16_0)	862.625	A	0.132039	0.125586	0.130908	0.119929	0.148209	0.130389	0.147002	0.14146	0.0507841	0.0483025	0.0503493	0.0461265	0.086168	0.0758078	0.0854661	0.082244	0.752679	5.12356
SM(d18_0_18_0)	733.622	C	0.04845	0.0535853	0.0491431	0.0465357	0.0581676	0.0459208	0.0612578	0.0562198	0.0186346	0.0206097	0.0189012	0.0178984	0.0338184	0.0266982	0.035615	0.032686	0.754022	3.53512
PC(18_1_24_1)	928.701	A	0.0837763	0.0839761	0.0890466	0.0768135	0.0984615	0.0802911	0.0971189	0.0986367	0.0322217	0.0322985	0.0342487	0.0295436	0.057245	0.0466809	0.0564645	0.0573469	0.759662	3.97189
PC(14_1e_16_0)	690.543	B	0.0931236	0.0971945	0.108495	0.0967233	0.119034	0.0897524	0.126174	0.11135	0.0358168	0.0373825	0.0417287	0.0372013	0.0692056	0.0521816	0.0733568	0.0647384	0.761149	3.19476
PC(16_0_16_0)	792.576	A	7.45974	7.14582	7.49191	6.61406	8.10224	7.79539	7.98452	8.44879	2.86913	2.74839	2.8815	2.54387	4.7106	4.5322	4.64216	4.91209	0.768553	5.40777
PE(12_1e_18_1)	644.466	C	0.0354472	0.0323566	0.0357821	0.0393469	0.0401933	0.0364828	0.043364	0.0410704	0.0136335	0.0124449	0.0137623	0.0151334	0.0233682	0.0212109	0.0252116	0.0238781	0.76949	4.21375
PC(18_0_24_2)	870.695	C	0.0576181	0.0590651	0.0581051	0.0551051	0.0659145	0.0551246	0.0743091	0.0656743	0.0221608	0.0227174	0.0223481	0.0211943	0.0383224	0.0320492	0.043203	0.0381827	0.771723	3.82604
ChE(22_6)	714.618	B	0.0355968	0.0283688	0.0365258	0.0394183	0.0342711	0.0338767	0.0435793	0.0467769	0.0136911	0.0109111	0.0140484	0.0151609	0.019925	0.0196958	0.0253368	0.0271959	0.771826	2.57544
TG(18_1_20_2_22_3)	980.864	A	0.221082	0.289897	0.2464	0.188728	0.256935	0.229981	0.296767	0.279116	0.0850314	0.111499	0.0947693	0.0725877	0.149381	0.13371	0.172539	0.162277	0.775024	2.64205
CL(18_4_16_1_16_1_18_1)	1393.92	B	0.216608	0.210189	0.245448	0.21843	0.256813	0.222602	0.264257	0.267036	0.0833109	0.0808419	0.094403	0.0840114	0.14931	0.12942	0.153638	0.155253	0.777302	4.22107
PC(18_0_18_1)	846.623	A	6.10748	5.69526	6.12816	5.93387	6.63307	6.64691	6.62269	7.16499	2.34903	2.19049	2.35699	2.28226	3.85644	3.86448	3.8504	4.16569	0.777598	6.11967
TG(15_0_18_1_20_5)	865.728	A	0.0858813	0.101745	0.0951507	0.0770201	0.081806	0.110435	0.101345	0.116324	0.0330313	0.0391325	0.0365964	0.0296231	0.0475617	0.0642064	0.0589216	0.0676302	0.779588	2.81158
PC(16_0_17_0)	806.592	A	2.98255	2.83589	3.06639	2.90727	3.32	3.32913	3.25948	3.5066	1.14714	1.09073	1.17938	1.11818	1.93023	1.93554	1.89504	2.03872	0.782226	6.41966
Hex1Cer(d18_1_16_0)	700.572	A	0.148465	0.14538	0.166468	0.144065	0.170992	0.150272	0.191817	0.175991	0.0571021	0.0559153	0.064026	0.0554096	0.099414	0.0873672	0.111522	0.10232	0.782309	3.96233
TG(18_1_18_2_22_5)	948.802	A	0.00517188	0.00410601	0.00508344	0.00331327	0.00455323	0.00559115	0.00551882	0.00428896	0.00198918	0.00157923	0.00195517	0.00127433	0.00264723	0.00325067	0.00320862	0.00249358	0.784239	2.32512
PE(20_0p_18_1)	758.606	B	0.0705939	0.0657474	0.0689534	0.0650544	0.0797589	0.0680108	0.0840537	0.0770528	0.0271515	0.0252874	0.0265205	0.0250209	0.0463714	0.0395412	0.0488684	0.0447981	0.784808	4.49577
TG(18_1_18_1_22_4)	952.833	A	0.40032	0.501449	0.450518	0.321564	0.427163	0.412286	0.528834	0.526968	0.153969	0.192865	0.173276	0.123679	0.248351	0.239701	0.307462	0.306377	0.784857	2.46935
TG(18_3_18_2_22_5)	927.744	A	0.0660163	0.0724951	0.0647155	0.0585237	0.0682203	0.076961	0.0780002	0.0747704	0.0253909	0.0278827	0.0248906	0.0225091	0.0396629	0.0447447	0.045349	0.0434712	0.785212	4.29055
AcCa(18_0)	428.373	A	0.0131121	0.0127005	0.0156514	0.0211385	0.0152389	0.0192154	0.0188728	0.0170571	0.00504313	0.00488481	0.00601978	0.00813018	0.00885983	0.0111717	0.0109726	0.00991693	0.78979	2.2763
PC(19_0_18_1)	860.639	A	0.368534	0.343185	0.369676	0.366692	0.421875	0.389365	0.411077	0.435102	0.141744	0.131994	0.142183	0.141035	0.245276	0.226375	0.238998	0.252966	0.790376	5.80686
SPH(d18_0)	302.305	C	0.0660322	0.0667723	0.0612224	0.0616808	0.0687024	0.0748585	0.0712824	0.0790977	0.025397	0.0256817	0.0235471	0.0237234	0.0399432	0.0435224	0.0414432	0.045987	0.796204	5.17718
LPC(17_0)	568.362	A	0.0414244	0.0385314	0.0431984	0.0429265	0.0497116	0.0434359	0.0460682	0.0519807	0.0159325	0.0148198	0.0166148	0.0165102	0.0289021	0.0252535	0.0267838	0.0302214	0.797318	4.60279
CL(18_1_16_0_18_0_18_2)	1430.01	A	0.154659	0.157257	0.171344	0.137208	0.177497	0.148607	0.193473	0.195859	0.0594843	0.0604834	0.0659014	0.0527721	0.103196	0.0863995	0.112485	0.113871	0.797548	3.39014
TG(20_1e_18_1_18_1)	916.869	B	0.0390372	0.0589808	0.0487976	0.0333484	0.0477813	0.0424877	0.0586038	0.0550697	0.0150143	0.0226849	0.0187683	0.0128263	0.0277798	0.0247021	0.034072	0.0320173	0.797659	2.06176
PE(18_1p_20_1)	756.59	B	0.169967	0.182279	0.188559	0.169686	0.217328	0.166375	0.233547	0.205428	0.065372	0.0701074	0.0725226	0.0652639	0.126354	0.0967299	0.135783	0.119435	0.797946	3.41711
PC(17_1_18_0)	832.607	A	0.122611	0.117205	0.102361	0.115159	0.122379	0.133658	0.131802	0.138323	0.0471582	0.0450789	0.0393694	0.0442919	0.0711504	0.077708	0.076629	0.0804204	0.800077	4.68568
Cer(d16_0_26_1)	708.651	B	0.087044	0.0903874	0.0908683	0.0777063	0.10096	0.0865222	0.104364	0.10746	0.0334785	0.0347644	0.0349493	0.029887	0.0586975	0.0503036	0.0606768	0.0624769	0.8007	4.02732
LPC(18_0)	582.378	A	0.155395	0.144706	0.173464	0.168466	0.177428	0.171258	0.186551	0.20723	0.0597672	0.0556563	0.0667168	0.0647945	0.103156	0.0995685	0.10846	0.120482	0.805615	4.13093
PS(20_1_18_2)	836.541	C	0.071	0.0744494	0.0709741	0.0711405	0.0720212	0.101046	0.0809401	0.0827752	0.0273077	0.0286344	0.0272977	0.0273617	0.0418728	0.0587474	0.0470582	0.0481251	0.813445	3.66486
CL(16_1_16_1_16_1_18_1)	1371.93	A	0.707315	0.752111	0.788316	0.668367	0.865169	0.730968	0.890271	0.909979	0.272044	0.289273	0.303199	0.257064	0.503005	0.424982	0.517599	0.529058	0.813642	4.02573
dMePE(16_0_16_0)	718.539	B	0.0182033	0.0219677	0.0258485	0.0205945	0.0242695	0.0256457	0.0225373	0.0280189	0.00700128	0.0084491	0.00994175	0.00792097	0.0141102	0.0149103	0.0131031	0.0162901	0.817266	3.22466
Hex2Cer(d18_1_22_0)	946.719	A	0.0190889	0.0124618	0.0181158	0.0164106	0.0201518	0.0174372	0.0199471	0.0187171	0.00734188	0.00479302	0.00696763	0.00631177	0.0117162	0.0101379	0.0115972	0.010882	0.818973	2.87505
LPE(17_0)	466.294	A	0.0746212	0.0754172	0.0779358	0.0742068	0.0953574	0.0782256	0.0896224	0.0907032	0.0287005	0.0290066	0.0299753	0.0285411	0.0554403	0.04548	0.0521061	0.0527344	0.820524	4.8939
Hex2Cer(t18_0_24_0)	974.75	A	0.0180372	0.0181173	0.0190062	0.0154861	0.0199618	0.0166574	0.0245778	0.0220106	0.00693738	0.00696821	0.00731008	0.00595621	0.0116057	0.00968454	0.0142894	0.0127969	0.821896	3.04546
FA 20_0	311.296	D	0.0439231	0.0403609	0.0354638	0.0357448	0.0401053	0.0525909	0.0456637	0.0440409	0.0168935	0.0155234	0.0136399	0.013748	0.0233171	0.0305761	0.0265487	0.0256052	0.825222	3.5388
DG(16_0_18_3)	608.525	B	0.0038937	0.00323657	0.00354211	0.00481218	0.00353851	0.00471358	0.00650107	0.0037481	0.00149758	0.00124483	0.00136235	0.00185084	0.00205727	0.00274045	0.00377969	0.00217913	0.826077	1.90837
TG(18_1_20_3_22_4)	976.833	A	0.0586184	0.0747378	0.0742351	0.0588281	0.0730338	0.0691058	0.0793101	0.0927193	0.0225455	0.0287453	0.0285519	0.0226262	0.0424615	0.0401778	0.0461105	0.0539066	0.835089	3.07852
MePC(16_1e_22_6)	826.572	C	0.0203088	0.0222023	0.0260647	0.0255603	0.0239777	0.0284621	0.0276177	0.0310143	0.00781108	0.00853936	0.0100249	0.0098309	0.0139405	0.0165477	0.0160568	0.0180316	0.836214	3.45778
PE(20_1e_18_2)	778.572	C	0.0378302	0.0388471	0.0377945	0.0358258	0.0499956	0.0361351	0.0490558	0.0441693	0.0145501	0.0149412	0.0145363	0.0137792	0.0290672	0.0210088	0.0285208	0.0256798	0.84014	3.57728
FA 16_0	255.233	D	3.12683	3.00284	2.86998	2.49529	3.42449	3.41504	3.38202	3.34614	1.20263	1.15494	1.10384	0.959728	1.99098	1.98549	1.96629	1.94543	0.840327	4.64845
Hex1Cer(t16_0_24_0)	860.683	C	0.00655703	0.00794077	0.00779032	0.00678395	0.00864471	0.00752714	0.00920717	0.00908387	0.00252193	0.00305414	0.00299628	0.00260921	0.00502599	0.00437624	0.00535301	0.00528132	0.842067	3.90924
PE(18_0p_22_2)	784.621	B	0.0497016	0.044708	0.0486438	0.0463529	0.0599125	0.0473299	0.0630286	0.056613	0.019116	0.0171954	0.0187091	0.017828	0.0348329	0.0275174	0.0366445	0.0329145	0.849605	3.92654
Hex1Cer(d18_2_24_0)	810.682	A	0.00143409	0.00130521	0.00128729	0	0.00177368	0.00171768	0.00134602	0	0.000551573	0.000502005	0.00049511	0	0.00103121	0.000998651	0.000782569	0	0.851821	2.49281
Hex1Cer(d21_1_17_0)	814.641	C	0.00544017	0.00539501	0.00504379	0.00541662	0.00638668	0.00620089	0.00646882	0.00637548	0.00209237	0.002075	0.00193992	0.00208332	0.00371319	0.00360517	0.00376094	0.00370667	0.852704	6.99838
Hex1Cer(d19_2_23_0	826.677	C	0.0598995	0.0572264	0.065686	0.0580107	0.0928676	0.0527221	0.0921054	0.05915	0.0230383	0.0220101	0.0252639	0.0223118	0.0539928	0.0306524	0.0535496	0.0343895	0.853633	2.1102
Hex1Cer(d18_1_22_0)	784.666	A	0.0446657	0.0430227	0.0472222	0.0425556	0.0510915	0.0463844	0.0575172	0.059375	0.0171791	0.0165472	0.0181624	0.0163675	0.0297044	0.0269677	0.0334402	0.0345204	0.862976	4.17453
FA(22_4)	331.264	C	0.027373	0.0259502	0.0279708	0.019246	0.0344526	0.0242668	0.031249	0.0307174	0.0105281	0.00998086	0.010758	0.00740232	0.0200306	0.0141086	0.018168	0.017859	0.863474	2.71042
FA(22_5)	329.249	C	0.0300423	0.0256876	0.0290107	0.0207215	0.0367266	0.026211	0.0313238	0.0323608	0.0115547	0.00987984	0.011158	0.00796982	0.0213527	0.015239	0.0182115	0.0188144	0.864283	2.81813
PC(16_1_21_0)	802.632	C	0.324868	0.293384	0.344746	0.329296	0.393302	0.335142	0.43032	0.402584	0.124949	0.11284	0.132595	0.126652	0.228664	0.19485	0.250186	0.23406	0.865489	4.11731
LPE(20_2)	504.31	B	0.0300398	0.0336178	0.034827	0.0233265	0.0387307	0.0272267	0.0436206	0.0383909	0.0115538	0.0129299	0.013395	0.00897173	0.0225179	0.0158295	0.0253608	0.0223203	0.872603	2.36108
CL(20_4_16_0_16_0_18_1)	1425.98	B	0.0380075	0.03326	0.0356521	0.0324955	0.0401501	0.036934	0.0439416	0.0487441	0.0146183	0.0127923	0.0137123	0.0124983	0.0233431	0.0214733	0.0255474	0.0283396	0.875321	3.90741
TG(18_1_18_2_18_2)	898.786	A	0.701499	0.916252	0.806049	0.632961	0.824352	0.818275	1.05692	1.0282	0.269807	0.352405	0.310019	0.243447	0.479274	0.475741	0.614491	0.597792	0.886235	2.93147
PG(16_0_18_1)	766.559	A	0.203268	0.201507	0.203097	0.180746	0.237173	0.210476	0.265728	0.253813	0.0781802	0.0775028	0.0781143	0.0695177	0.137891	0.12237	0.154493	0.147566	0.886843	4.37269
Cer(d19_1_18_0)	638.573	B	0.00152613	0.0015751	0.0014585	0.00123774	0.00167528	0.00163943	0.00184009	0.00193491	0.000586973	0.000605808	0.000560961	0.000476053	0.000974003	0.000953159	0.00106982	0.00112495	0.889136	4.05568
PI(16_0_18_1)	837.549	B	0.976612	0.909563	0.954089	0.946393	1.16735	1.05554	1.22427	1.20529	0.37562	0.349832	0.366957	0.363997	0.678689	0.613686	0.711783	0.70075	0.891278	5.56902
TG(16_1_18_1_22_3)	926.817	A	1.02041	1.3651	1.19325	0.867963	1.2264	1.15914	1.54992	1.49049	0.392467	0.525039	0.458943	0.333832	0.713022	0.67392	0.901115	0.866561	0.892776	2.656
FA 19_0	297.28	D	0.0161315	0.0153928	0.0146763	0.0134657	0.0192547	0.0173538	0.0185713	0.0180841	0.00620442	0.00592032	0.00564473	0.00517912	0.0111946	0.0100894	0.0107973	0.010514	0.894442	5.0785
TG(17_0_18_1_22_5)	938.817	A	0.0549699	0.0665887	0.0593476	0.0471207	0.0655299	0.0596354	0.0764336	0.0785775	0.0211423	0.025611	0.022826	0.0181234	0.0380988	0.0346718	0.0444381	0.0456846	0.895397	3.15108
TG(15_0_18_1_22_4)	912.802	A	0.112665	0.146353	0.135843	0.0982504	0.133476	0.137647	0.16214	0.169445	0.0433326	0.0562896	0.0522473	0.0377886	0.0776024	0.0800275	0.0942673	0.0985145	0.895515	2.91961
PC(16_0_22_1)	816.648	C	0.230689	0.229254	0.24188	0.236643	0.292875	0.253899	0.314233	0.3041	0.0887264	0.0881748	0.0930309	0.0910166	0.170276	0.147616	0.182693	0.176802	0.903856	4.87557
TG(18_0e_18_1_18_1)	895.809	B	0.0344734	0.0471011	0.0368603	0.0314533	0.0400125	0.040826	0.0543544	0.0499461	0.013259	0.0181158	0.0141771	0.0120974	0.0232631	0.023736	0.0316014	0.0290384	0.905149	2.80697
Hex1Cer(d16_0_24_1)	842.673	C	0.0155926	0.015321	0.0171474	0.0165112	0.0203951	0.0172133	0.0213126	0.0216061	0.00599714	0.00589268	0.00659515	0.00635047	0.0118576	0.0100077	0.012391	0.0125617	0.910376	4.4286
PS(18_1_22_6)	832.513	B	0.0928298	0.0816488	0.0925352	0.0935064	0.116008	0.0988341	0.116584	0.117527	0.0357038	0.0314034	0.0355905	0.035964	0.0674468	0.0574617	0.0677816	0.0683297	0.91118	4.68339
PE(18_1_22_0)	800.617	A	0.0221794	0.0250596	0.0249173	0.0243197	0.0319227	0.0293017	0.0297516	0.0290815	0.00853055	0.00963831	0.00958357	0.00935374	0.0185597	0.0170358	0.0172974	0.0169079	0.912297	5.7014
PE(17_1_18_1)	730.538	A	0.596473	0.583165	0.657753	0.586125	0.788048	0.690317	0.774754	0.764718	0.229413	0.224294	0.252982	0.225433	0.458168	0.401347	0.450439	0.444603	0.912377	5.32549
TG(16_0e_18_3_22_5)	906.791	B	0.00292797	0.00537859	0.00172647	0.00145495	0.00320476	0	0.00387537	0.00246004	0.00112614	0.00206869	0.000664026	0.000559598	0.00186323	0	0.00225312	0.00143026	0.914033	0.842498
CL(18_1_16_0_16_0_18_1)	1404	A	0.116309	0.117587	0.127517	0.0971469	0.141757	0.118988	0.14754	0.165155	0.0447343	0.0452256	0.049045	0.0373642	0.0824169	0.0691791	0.0857793	0.0960204	0.915741	3.4176
TG(18_0e_16_0_22_6)	910.822	C	0.0118831	0.0208008	0.0162073	0.0129114	0.0156538	0.020634	0.0212329	0.0184512	0.00457042	0.0080003	0.00623357	0.00496592	0.00910105	0.0119965	0.0123447	0.0107274	0.918782	2.35915
PI(17_0_18_1)	849.55	A	0.502866	0.506389	0.539701	0.538542	0.651858	0.602601	0.685913	0.680029	0.19341	0.194765	0.207577	0.207131	0.378987	0.35035	0.398787	0.395366	0.92304	5.74533
PI(16_0_16_0)	811.533	A	0.0588876	0.0595875	0.0634429	0.0589755	0.0685975	0.0708946	0.0910326	0.0744364	0.0226491	0.0229183	0.0244011	0.0226829	0.0398823	0.0412178	0.0529259	0.043277	0.928022	4.17836
TG(19_1_18_1_22_3)	968.864	A	0.0593938	0.0734877	0.0584261	0.0423016	0.0680704	0.0601117	0.0853761	0.077526	0.0228438	0.0282645	0.0224716	0.0162699	0.0395758	0.0349487	0.0496373	0.0450732	0.928115	2.47309
PS(17_0_20_2)	800.545	C	0.0195881	0.0237866	0.0178724	0.0246372	0.0294729	0.0306341	0.0281791	0.0203448	0.00753388	0.00914869	0.00687398	0.00947583	0.0171354	0.0178105	0.0163832	0.0118283	0.929883	2.74333
PE(17_0_18_2)	728.524	A	0.524951	0.544153	0.603485	0.593309	0.707375	0.665002	0.744211	0.739187	0.201904	0.209289	0.23211	0.228196	0.411265	0.386629	0.432681	0.42976	0.9309	5.29225
TG(18_1_22_2_22_3)	1008.9	A	0.0875972	0.110392	0.102518	0.0730508	0.111182	0.104012	0.133859	0.119072	0.0336912	0.0424584	0.03943	0.0280965	0.0646407	0.0604724	0.0778249	0.0692281	0.933051	3.04992
PC(15_0_24_2)	828.648	C	0.0409	0.0339866	0.0412224	0.0363899	0.047199	0.0385677	0.0561556	0.051942	0.0157308	0.0130718	0.0158548	0.0139961	0.0274413	0.0224231	0.0326486	0.0301988	0.933214	3.3403
PE(14_1e_22_5)	720.497	C	0.012152	0.00906674	0.0130088	0.0138971	0.0120303	0.0155233	0.0184538	0.0150068	0.00467385	0.00348721	0.00500339	0.00534502	0.00699438	0.00902519	0.0107289	0.0087249	0.940235	2.63636
FA 26_1	393.374	D	0.0126215	0.0125624	0.0136312	0.0103186	0.0172076	0.0135273	0.0171311	0.014584	0.00485443	0.00483168	0.00524275	0.00396868	0.0100044	0.0078647	0.00995996	0.0084791	0.941799	3.60991
Cer(d18_2_18_0)	622.542	A	0.00508398	0.00576952	0.00558046	0.00523033	0.00694318	0.00711854	0.00648651	0.00696857	0.00195538	0.00221905	0.00214633	0.00201166	0.00403673	0.00413869	0.00377123	0.0040515	0.94205	5.79084
GM3(d18_1_24_0+O)	1279.83	C	0.00279899	0.00255632	0.00227081	0.00252954	0.00274757	0.00348512	0.00307498	0.00368402	0.00107654	0.000983199	0.000873388	0.0009729	0.00159743	0.00202623	0.00178778	0.00214187	0.946144	3.80105
Cer(d18_2_16_0)	594.51	A	0.0356558	0.0312603	0.0363798	0.0285576	0.0459759	0.0401043	0.0373615	0.0443697	0.0137138	0.0120232	0.0139922	0.0109837	0.0267302	0.0233165	0.0217218	0.0257963	0.946175	3.93219
FA 26_0	395.389	D	0.0045859	0.00455105	0.00370141	0.00427526	0.00558263	0.00630829	0.00469512	0.00533464	0.00176381	0.0017504	0.00142362	0.00164433	0.00324572	0.00366761	0.00272972	0.00310154	0.950418	3.80274
TG(15_0_16_0_22_5)	884.77	A	0.048292	0.0567078	0.0523532	0.043327	0.0573359	0.0575228	0.0771308	0.0665227	0.0185739	0.0218107	0.0201359	0.0166642	0.0333348	0.0334435	0.0448435	0.038676	0.957565	3.46936
CL(16_1_16_1_16_1_16_1)	1343.9	A	0.117613	0.127335	0.13216	0.113211	0.155523	0.142549	0.168732	0.16687	0.0452359	0.048975	0.0508306	0.0435428	0.0904201	0.0828771	0.0981001	0.0970176	0.965618	4.83743
Hex1Cer(d18_1_23_0)	856.688	C	0.00609032	0.00624438	0.00668007	0.0067455	0.00833691	0.00755882	0.00857892	0.00885854	0.00234243	0.00240169	0.00256926	0.00259442	0.00484704	0.00439466	0.00498774	0.00515031	0.966771	5.38681
PC(18_1_22_1)	900.67	A	0.159632	0.161187	0.171618	0.150539	0.215463	0.178987	0.220745	0.218756	0.0613971	0.0619951	0.0660069	0.0578998	0.125269	0.104062	0.12834	0.127184	0.967645	4.65826
PE(16_0p_22_4)	752.559	B	1.08067	0.978271	1.12267	1.09763	1.4419	1.30609	1.4147	1.3738	0.415644	0.376258	0.431798	0.422165	0.838314	0.759354	0.822499	0.79872	0.968684	5.7267
CL(18_1_18_0_18_1_16_0)	1432.03	A	0.0188931	0.0216477	0.0226252	0.0179398	0.0243253	0.0220802	0.0275193	0.0316044	0.00726657	0.00832603	0.00870199	0.00689992	0.0141426	0.0128373	0.0159996	0.0183747	0.969257	3.39465
DG(18_1_18_1)	638.572	A	4.05752	4.30664	4.39951	4.17661	5.24023	5.22855	6.18723	5.33672	1.56058	1.6564	1.69212	1.60639	3.04665	3.03986	3.59723	3.10275	0.969717	5.2946
Hex1Cer(t18_0_23_0)	798.682	A	0.0151146	0.0135509	0.0177264	0.0145641	0.0190658	0.0180443	0.0212629	0.0203679	0.00581332	0.0052119	0.00681784	0.00560157	0.0110848	0.0104909	0.0123622	0.0118418	0.969731	4.23403
TG(18_0e_15_0_18_2)	848.807	B	0.0353927	0.057572	0.0476006	0.0351149	0.04946	0.0457401	0.0649063	0.0656318	0.0136126	0.0221431	0.0183079	0.0135057	0.0287558	0.0265931	0.0377362	0.038158	0.971251	2.35221
PE(16_1e_22_4)	750.544	A	1.21546	1.36868	1.19662	1.28611	1.57698	1.45078	1.84709	1.73815	0.467485	0.526417	0.460239	0.494658	0.916848	0.843478	1.07389	1.01055	0.976235	4.48036
PE(16_1e_14_0)	646.482	C	0.0163303	0.020777	0.0173853	0.0158147	0.0231877	0.0209387	0.0248458	0.0222297	0.00628088	0.00799116	0.00668667	0.00608257	0.0134812	0.0121737	0.0144452	0.0129242	0.97694	4.1285
AcCa(16_1)	398.327	A	0.00747269	0.00872296	0.00803528	0.010116	0.00846602	0.0160627	0.0122296	0.00917824	0.00287411	0.00335499	0.00309049	0.00389076	0.00492211	0.00933876	0.00711023	0.00533619	0.977726	2.26587
PE(18_1_22_6)	788.524	A	0.800867	0.68843	0.763597	0.699663	0.980105	1.03666	0.905486	0.923242	0.308026	0.264781	0.293691	0.269101	0.569829	0.602709	0.526446	0.536768	0.978069	5.14438
SPH(d18_1)	300.29	C	0.0364504	0.0425769	0.042744	0.0431714	0.0487113	0.0546906	0.054741	0.0567659	0.0140194	0.0163757	0.01644	0.0166044	0.0283205	0.0317969	0.0318262	0.0330035	0.978951	4.88623
PI(20_1_18_2)	906.607	C	0.0509038	0.0513854	0.0497842	0.276962	0.107279	0.106713	0.108752	0.0857216	0.0195784	0.0197636	0.0191478	0.106524	0.0623714	0.0620422	0.0632281	0.0498381	0.987391	0.792495
AcCa(15_0)	386.327	A	0.00380451	0.00338624	0.00353768	0.00406173	0.0043357	0.00592093	0.00581203	0.00370011	0.00146327	0.0013024	0.00136064	0.0015622	0.00252075	0.0034424	0.00337908	0.00215123	0.990205	2.8762
TG(18_1_18_1_22_5)	950.817	A	0.191966	0.2321	0.206849	0.166294	0.247995	0.22895	0.281728	0.293278	0.073833	0.0892692	0.0795573	0.0639591	0.144183	0.13311	0.163795	0.17051	0.999604	3.59241
PE(16_1_18_1)	716.523	A	6.08682	6.31096	6.50123	5.85079	8.09235	7.61976	8.96234	8.13657	2.34108	2.42729	2.50047	2.25031	4.70486	4.43009	5.21066	4.73057	1.00153	5.59359
TG(18_1_18_2_20_5)	920.77	A	0.0430693	0.0508176	0.0476265	0.0366155	0.0522283	0.0546585	0.0621234	0.0668956	0.0165651	0.0195452	0.0183179	0.0140829	0.0303653	0.0317782	0.0361183	0.0388928	1.00513	3.5763
PE(8_0e_9_0)	468.308	C	0.0341778	0.032357	0.0311232	0.032499	0.04405	0.0380954	0.0482533	0.0431439	0.0131453	0.012445	0.0119705	0.0124996	0.0256104	0.0221485	0.0280542	0.0250837	1.00686	4.95907
TG(16_1_18_2_18_2)	870.755	A	0.200018	0.257764	0.220092	0.173869	0.248254	0.23982	0.33212	0.312049	0.0769299	0.09914	0.0846506	0.0668728	0.144334	0.13943	0.193093	0.181424	1.00734	3.02262
PE(18_1_22_1)	798.602	A	0.208179	0.224204	0.228842	0.213369	0.3125	0.250501	0.311527	0.294832	0.0800687	0.0862322	0.088016	0.0820649	0.181686	0.14564	0.181121	0.171414	1.0105	4.78228
CerG3GNAc1(d18_1_16_0)	1227.76	C	0.00379116	0.00570343	0.00466072	0.00604773	0.00679958	0.00560282	0.00672196	0.0075419	0.00145814	0.00219363	0.00179258	0.00232605	0.00395325	0.00325745	0.00390812	0.00438482	1.0121	2.90641
Cer(d18_1_23_1)	692.62	A	0.00231383	0.00231177	0.00252622	0.00234762	0.00330899	0.00266223	0.00303164	0.00379893	0.000889934	0.000889144	0.000971624	0.000902931	0.00192383	0.00154781	0.00176258	0.00220868	1.01542	3.99415
FA 23_0	353.342	D	0.00398668	0.00298587	0.0039765	0.00392142	0.00520391	0.0052368	0.00550734	0.00398953	0.00153334	0.00114841	0.00152942	0.00150824	0.00302553	0.00304465	0.00320194	0.00231949	1.01851	3.35751
PE(15_0_18_2)	700.492	A	0.0828538	0.0874471	0.088868	0.084149	0.11512	0.108856	0.121085	0.11625	0.0318668	0.0336335	0.03418	0.032365	0.0669305	0.0632885	0.0703985	0.067587	1.02184	6.66163
TG(18_1_17_1_18_2)	886.786	A	0.191908	0.246496	0.223529	0.160156	0.234151	0.244918	0.315454	0.30542	0.0738109	0.0948062	0.0859727	0.0615986	0.136134	0.142394	0.183403	0.17757	1.02261	2.96481
Hex1Cer(d16_0_18_1)	758.579	A	0.0369514	0.0385452	0.0375091	0.036257	0.0479472	0.0547381	0.0500911	0.0482449	0.0142121	0.0148251	0.0144266	0.013945	0.0278763	0.0318245	0.0291228	0.0280494	1.02391	6.1696
TG(16_0_18_1_18_3)	872.77	A	0.987995	1.38186	1.18155	0.890974	1.3197	1.28975	1.75409	1.62524	0.379998	0.531486	0.454441	0.342682	0.767268	0.749852	1.01982	0.944904	1.03494	2.94419
PI(18_1_18_1)	861.55	A	5.31405	5.46888	5.91687	5.51396	7.57536	6.8267	7.89386	7.85937	2.04387	2.10341	2.27572	2.12075	4.40428	3.96901	4.58945	4.5694	1.03577	5.66661
PE(16_0_18_2)	738.504	C	0.396568	0.412519	0.381276	0.390294	0.497911	0.592568	0.547058	0.511327	0.152526	0.158661	0.146644	0.150113	0.289483	0.344516	0.318057	0.297283	1.03645	5.5768
PC(18_3e_17_0)	756.59	C	0.0104217	0.00769345	0.0115917	0.0131487	0.0152833	0.0124708	0.0156826	0.0138723	0.00400834	0.00295902	0.00445835	0.00505718	0.00888561	0.00725044	0.00911778	0.00806529	1.03675	2.90545
PC(16_0_24_2)	842.663	C	0.116653	0.122438	0.128223	0.119216	0.170131	0.140452	0.189256	0.164765	0.0448664	0.0470914	0.0493165	0.0458522	0.0989134	0.081658	0.110033	0.0957937	1.03885	4.49269
PE(17_1_18_2)	726.508	A	0.0199975	0.00990927	0.0211418	0.0158979	0.0250039	0.0194849	0.0198473	0.023648	0.00769136	0.00381126	0.00813146	0.00611456	0.0145372	0.0113285	0.0115391	0.0137488	1.041	2.11475
TG(18_0e_18_1_22_6)	936.838	C	0.0113872	0.0112263	0.0106658	0.0100458	0.0143884	0.0133137	0.0203226	0.0120889	0.00437968	0.0043178	0.00410222	0.00386378	0.00836537	0.0077405	0.0118154	0.00702842	1.04128	3.08743
LPS(18_0)	524.299	B	0.0738284	0.0690068	0.0777525	0.0714482	0.101446	0.0769257	0.115383	0.109458	0.0283956	0.0265411	0.0299048	0.0274801	0.0589803	0.0447242	0.067083	0.0636386	1.04612	3.61186
PI(18_0_16_1)	835.534	A	5.63063	5.77042	6.19408	5.84607	8.063	7.31076	8.35419	8.35642	2.16563	2.21939	2.38234	2.24849	4.68779	4.25044	4.85709	4.85838	1.0477	5.91215
dMePE(18_0_18_1)	772.586	B	0.0111524	0.00755656	0.0121268	0.0107898	0.0145266	0.011985	0.0124512	0.01785	0.00428937	0.00290637	0.00466416	0.00414991	0.00844572	0.00696799	0.00723906	0.0103779	1.04888	2.72102
PE(20_1_22_6)	816.555	A	0.0793674	0.0610334	0.105583	0.112057	0.122459	0.108079	0.123046	0.124128	0.0305259	0.0234744	0.040609	0.0430989	0.0711969	0.0628364	0.0715385	0.0721673	1.05073	2.63629
TG(16_0e_16_1_22_5)	882.791	B	0.0363812	0.0464708	0.0406642	0.031457	0.0457566	0.0496106	0.0563477	0.0597841	0.0139928	0.0178734	0.0156401	0.0120989	0.0266027	0.0288434	0.0327603	0.0347582	1.05162	3.40803
PE(17_0_18_1)	730.539	A	1.10592	1.1195	1.21438	1.163	1.57845	1.489	1.65292	1.59593	0.425353	0.430579	0.467067	0.447309	0.917705	0.8657	0.961003	0.927868	1.05263	6.47525
TG(18_1_18_1_22_3)	954.848	A	0.67651	0.900583	0.777927	0.544734	0.942765	0.823272	1.14142	1.03929	0.260196	0.346378	0.299203	0.209513	0.548119	0.478647	0.663616	0.604241	1.0547	2.90793
Cer(d18_2_20_0)	650.573	B	0.00335637	0.00311936	0.00337895	0.00253313	0.00453876	0.00390514	0.00489005	0.00368793	0.00129091	0.00119975	0.0012996	0.000974279	0.00263881	0.00227043	0.00284305	0.00214415	1.05477	3.62967
TG(18_1_18_1_20_4)	924.802	A	0.424372	0.533606	0.470471	0.369198	0.562794	0.540791	0.693822	0.671671	0.16322	0.205233	0.18095	0.141999	0.327206	0.314413	0.403385	0.390507	1.0587	3.48595
Cer(t17_0_23_0)	698.63	A	0.00196784	0.00246456	0.00226103	0.00192197	0.00305412	0.00258487	0.00278685	0.00350926	0.000756862	0.000947906	0.000869625	0.000739218	0.00177565	0.00150283	0.00162026	0.00204027	1.06439	3.79762
MePC(15_0_16_0)	751.596	C	0.0407814	0.0378753	0.0430639	0.0403947	0.0537809	0.0493437	0.0602781	0.0620957	0.0156851	0.0145674	0.016563	0.0155364	0.031268	0.0286882	0.0350454	0.0361022	1.06767	4.79609
TG(16_0e_16_0_18_1)	841.762	A	0.149624	0.209871	0.175464	0.13158	0.197262	0.214214	0.268343	0.240054	0.0575475	0.0807197	0.0674861	0.0506078	0.114687	0.124543	0.156014	0.139566	1.07326	3.06708
TG(18_1_17_1_20_2)	914.817	A	0.265875	0.342718	0.304578	0.224993	0.363184	0.338916	0.442626	0.431981	0.10226	0.131815	0.117145	0.0865357	0.211153	0.197044	0.257341	0.251152	1.07466	3.26063
MePC(16_0_13_0)	723.565	C	0.0467703	0.0541363	0.0683861	0.0604076	0.0789898	0.0662948	0.0803764	0.0949028	0.0179886	0.0208216	0.0263023	0.0232337	0.0459243	0.0385435	0.0467305	0.0551761	1.07939	3.32499
Cer(d18_0_18_0)	626.573	B	0.00234499	0.00263215	0.00247787	0.00217402	0.00388041	0.00282412	0.00345441	0.00338908	0.000901917	0.00101236	0.000953029	0.000836162	0.00225605	0.00164193	0.00200838	0.0019704	1.08312	4.16651
TG(18_1_22_4_24_1)	1036.93	A	0.0276621	0.0369141	0.0334043	0.0252956	0.0406112	0.0366577	0.0472698	0.047327	0.0106393	0.0141977	0.0128478	0.00972909	0.0236111	0.0213126	0.0274825	0.0275157	1.08325	3.3913
Cer(d17_1_16_0)	582.51	A	0.0130687	0.0116993	0.0128126	0.0103614	0.0178096	0.0153249	0.0166032	0.0173415	0.00502641	0.00449974	0.00492794	0.00398515	0.0103544	0.00890985	0.00965302	0.0100823	1.08433	4.7049
DG(18_0_18_1)	640.587	B	1.77376	2.04759	2.06131	2.00284	2.4837	2.55371	3.23937	2.86796	0.682217	0.787536	0.79281	0.770323	1.44401	1.48471	1.88335	1.66742	1.08972	4.42108
PE(19_1_18_1)	758.569	A	0.305557	0.293819	0.325083	0.3096	0.434059	0.379285	0.495217	0.437044	0.117522	0.113007	0.125032	0.119077	0.25236	0.220515	0.287917	0.254095	1.09096	4.88693
PE(19_1_20_1)	784.586	A	0.0562692	0.0559928	0.0603168	0.0564907	0.0861639	0.071688	0.0829637	0.0836496	0.021642	0.0215357	0.0231988	0.0217272	0.0500953	0.0416791	0.0482347	0.0486335	1.09548	5.57193
Cer(d18_1_16_0)	596.526	A	0.340933	0.327839	0.341228	0.282589	0.48134	0.438758	0.43541	0.472248	0.131128	0.126092	0.131242	0.108688	0.279849	0.255092	0.253146	0.274563	1.09872	5.22362
PS(17_0_22_5)	824.544	B	0.00540431	0.00340977	0.00522139	0.00492113	0.0107435	0.00594987	0.00484631	0.00617076	0.00207858	0.00131145	0.00200823	0.00189274	0.00624621	0.00345923	0.00281762	0.00358765	1.09945	2.0456
TG(18_0e_18_2_22_5)	936.838	B	0.00687071	0.00723661	0.00505039	0.00702081	0.0143884	0.00413868	0.0203226	0.00592339	0.00264258	0.00278331	0.00194246	0.00270031	0.00836537	0.00240621	0.0118154	0.00344383	1.10201	1.03633
PG(16_1_18_1)	764.544	B	0.0297879	0.032667	0.0348493	0.0257816	0.0429272	0.0342578	0.0526157	0.0466337	0.0114569	0.0125642	0.0134036	0.00991599	0.0249577	0.0199174	0.0305905	0.0271126	1.10739	3.33142
PG(18_1_14_0)	719.487	B	0.0602083	0.0642914	0.0767903	0.070322	0.0943533	0.0859547	0.106703	0.100883	0.023157	0.0247275	0.0295347	0.0270469	0.0548566	0.0499736	0.0620369	0.0586529	1.11168	4.45718
Cer(d18_1_18_0)	624.557	A	0.0223123	0.0223569	0.0217112	0.017255	0.0304823	0.0259978	0.0302437	0.0325759	0.00858164	0.0085988	0.00835045	0.00663654	0.0177223	0.015115	0.0175835	0.0189395	1.1118	4.18801
DG(16_0_14_0)	558.509	A	0.116481	0.138289	0.139788	0.143357	0.175384	0.193533	0.201179	0.19766	0.0448003	0.0531881	0.0537646	0.0551371	0.101968	0.112519	0.116965	0.114919	1.1121	5.01868
TG(14_0_18_2_18_2)	844.739	A	0.258081	0.350668	0.304026	0.22377	0.355635	0.348814	0.46199	0.450135	0.0992619	0.134872	0.116933	0.0860656	0.206764	0.202799	0.268599	0.261706	1.11284	3.11678
LPC(16_0)	554.346	A	0.568258	0.539547	0.634406	0.546065	0.82892	0.687756	0.826076	0.953189	0.218561	0.207518	0.244002	0.210025	0.48193	0.399858	0.480277	0.55418	1.11595	4.26761
DG(16_0e_18_1)	603.532	C	0.170252	0.183154	0.207843	0.183615	0.273663	0.237992	0.286555	0.270748	0.0654815	0.0704437	0.0799395	0.0706212	0.159106	0.138368	0.166602	0.157412	1.11765	4.98798
PI(19_1_18_1)	875.566	A	0.261732	0.275504	0.284263	0.301849	0.386245	0.39329	0.404526	0.427922	0.100666	0.105963	0.109332	0.116096	0.224561	0.228657	0.23519	0.248792	1.11797	6.09233
Hex1Cer(d18_2_24_1)	808.666	B	0.00220731	0.00160946	0.00264179	0	0.00308137	0.00251487	0.00328706	0.00339076	0.000848966	0.000619022	0.00101607	0	0.00179149	0.00146214	0.00191108	0.00197137	1.12743	2.52862
TG(16_1_17_1_18_2)	858.755	A	0.0600529	0.0833732	0.0732947	0.0587709	0.0937409	0.0850132	0.111503	0.106031	0.0230973	0.0320666	0.0281903	0.0226042	0.0545005	0.0494263	0.0648271	0.0616461	1.12789	3.55136
PC(17_1_22_6)	818.569	C	0.0572207	0.0455618	0.0508305	0.0511158	0.0693234	0.0625867	0.0845972	0.0819399	0.0220079	0.0175238	0.0195502	0.0196599	0.0403043	0.0363876	0.0491844	0.0476395	1.13374	4.0451
FA 15_0	241.217	D	0.0485884	0.0464345	0.0430057	0.0370654	0.0686761	0.0618844	0.0619725	0.0610167	0.0186878	0.0178594	0.0165406	0.0142559	0.039928	0.0359793	0.0360305	0.0354748	1.13606	4.70382
DG(18_3e_18_1)	603.535	C	0.31905	0.323376	0.335595	0.3138	0.445502	0.460161	0.48881	0.489034	0.122712	0.124375	0.129075	0.120692	0.259013	0.267536	0.284192	0.284322	1.13941	6.95688
DG(35_1_18_1)	876.838	C	0.0291176	0.0418536	0.0294967	0.0223276	0.0424611	0.0376865	0.0483226	0.0469321	0.0111991	0.0160975	0.0113449	0.00858753	0.0246867	0.0219107	0.0280945	0.0272861	1.14031	2.8685
PE(16_1_17_0)	702.508	A	0.494915	0.518631	0.562241	0.521403	0.759911	0.711827	0.792279	0.798306	0.190352	0.199474	0.216247	0.20054	0.441809	0.413853	0.460627	0.464132	1.14231	6.1522
TG(16_0_17_1_22_5)	910.786	A	0.0364539	0.0395722	0.0420285	0.033328	0.0499652	0.0481174	0.0595495	0.0644824	0.0140207	0.0152201	0.0161648	0.0128184	0.0290495	0.0279752	0.0346218	0.0374898	1.14406	4.03135
DG(16_1e_18_0)	603.532	C	0.316109	0.322837	0.33394	0.313301	0.445502	0.460161	0.48881	0.487614	0.12158	0.124168	0.128439	0.1205	0.259013	0.267536	0.284192	0.283496	1.14466	7.00682
Cer(t18_1_22_0)	620.598	B	0.007964	0.00829707	0.00960573	0.00762315	0.0129198	0.0105038	0.0133218	0.0122759	0.00306308	0.00319118	0.00369451	0.00293198	0.0075115	0.00610684	0.00774524	0.00713713	1.14546	4.45148
PC(15_0_16_0)	778.56	A	3.31698	3.12097	3.29752	3.20814	4.73596	4.69314	4.65283	4.93783	1.27576	1.20037	1.26828	1.2339	2.75347	2.72857	2.70513	2.87083	1.1514	7.8846
MePC(14_1e_20_4)	774.541	C	0.0796543	0.0721661	0.0814062	0.0881391	0.115163	0.114724	0.110026	0.13302	0.0306363	0.0277562	0.0313101	0.0338997	0.0669554	0.0666998	0.0639688	0.0773371	1.15337	5.02414
Cer(d18_2_24_1)	704.62	C	0.0090325	0.00779311	0.00833652	0.00670917	0.0147176	0.00726911	0.0124873	0.0138546	0.00347404	0.00299735	0.00320635	0.00258045	0.00855673	0.00422623	0.00726003	0.00805498	1.15436	2.44271
Cer(t17_0_24_1)	710.63	A	0.00278395	0.00274055	0.00290021	0.0024063	0.00412552	0.00343877	0.00401008	0.00443219	0.00107075	0.00105406	0.00111546	0.000925499	0.00239856	0.00199928	0.00233144	0.00257685	1.15699	4.68701
TG(16_0e_18_0_18_1)	869.793	A	0.0741712	0.109421	0.091998	0.0717005	0.109783	0.115726	0.150584	0.132803	0.0285274	0.0420851	0.0353839	0.0275771	0.0638275	0.0672826	0.0875486	0.0772113	1.15777	3.23056
PE(18_0_15_0)	704.524	A	0.185157	0.196969	0.207006	0.190028	0.289303	0.270177	0.303771	0.291663	0.0712142	0.0757573	0.0796176	0.0730877	0.1682	0.15708	0.176611	0.169571	1.1639	6.4135
LPE(18_1)	478.294	A	0.471653	0.483435	0.504369	0.403544	0.733497	0.547466	0.766685	0.72947	0.181405	0.185936	0.193988	0.155209	0.426452	0.318294	0.445747	0.42411	1.1648	3.93679
PC(20_3_22_6)	856.585	C	0.121493	0.11289	0.108561	0.106223	0.146592	0.152455	0.191383	0.179587	0.0467279	0.0434191	0.0417542	0.0408551	0.0852279	0.0886366	0.111269	0.104411	1.16609	4.57962
Hex2Cer(d18_1_24_1)	972.735	A	0.0132864	0.013593	0.0126155	0.0114642	0.0203646	0.0159426	0.0193608	0.0202169	0.00511017	0.00522807	0.00485213	0.00440932	0.0118399	0.00926895	0.0112563	0.011754	1.16673	4.64009
AcCa(17_0)	414.358	A	0.0043479	0.00501437	0.00464133	0.00644707	0.00760408	0.00737536	0.00824275	0.00688164	0.00167227	0.0019286	0.00178513	0.00247964	0.00442098	0.004288	0.00479229	0.00400095	1.16755	3.86957
PE(15_0_18_1)	704.523	A	0.515055	0.509688	0.549219	0.480296	0.764889	0.694298	0.810987	0.791196	0.198098	0.196034	0.211238	0.184729	0.444703	0.403662	0.471504	0.459997	1.17082	5.79922
PS(16_0_20_4)	782.498	A	0.0247294	0.0248273	0.0268236	0.0274848	0.0400149	0.0320604	0.0405812	0.0430374	0.00951132	0.00954894	0.0103168	0.0105711	0.0232645	0.0186398	0.0235937	0.0250218	1.17296	4.61137
PE(19_0_18_1)	758.571	A	0.251119	0.258662	0.27385	0.25612	0.401799	0.346101	0.413474	0.395241	0.0965841	0.0994856	0.105327	0.0985075	0.233604	0.201222	0.240392	0.229791	1.17574	5.81979
Cer(d16_1_16_0)	568.495	A	0.0118709	0.0116408	0.0118466	0.0103181	0.0172391	0.0160808	0.0169717	0.0180312	0.00456574	0.00447725	0.0045564	0.0039685	0.0100227	0.00934928	0.00986726	0.0104832	1.17819	5.98218
LPE(24_0)	564.403	B	0.0121463	0.0139394	0.0140442	0.012516	0.0205677	0.0168925	0.0204193	0.0212494	0.00467166	0.0053613	0.00540162	0.00481385	0.0119579	0.0098212	0.0118717	0.0123543	1.18127	4.85812
TG(20_1e_16_0_16_1)	862.822	B	0.224768	0.356475	0.281123	0.202259	0.333425	0.336567	0.474251	0.435256	0.0864491	0.137106	0.108124	0.077792	0.193852	0.195679	0.275728	0.253056	1.18264	2.73959
DG(18_3e_16_0)	577.519	C	0.40524	0.437952	0.4597	0.40472	0.626368	0.603195	0.663758	0.680139	0.155861	0.168443	0.176808	0.155662	0.364167	0.350695	0.385906	0.39543	1.18834	5.97753
PC(16_0_14_0)	764.545	A	5.4979	5.855	5.68995	5.22812	8.23405	8.0908	8.47177	8.78361	2.11458	2.25192	2.18844	2.01082	4.78724	4.70396	4.92544	5.10675	1.18913	6.79122
TG(18_0_18_1_20_5)	907.775	A	0.721918	0.856288	0.783923	0.645028	0.980157	1.16105	1.21016	1.17747	0.277661	0.329342	0.301509	0.248088	0.569859	0.675027	0.703583	0.684573	1.18988	4.40991
TG(16_1_18_1_20_2)	900.802	A	1.94548	2.66409	2.31864	1.64477	2.85489	2.7101	3.78359	3.52251	0.748261	1.02465	0.891784	0.632602	1.65982	1.57564	2.19976	2.04797	1.19191	3.10882
TG(18_4_15_0_18_2)	837.697	A	0.0340426	0.0433527	0.0406532	0.0308217	0.0523396	0.0479551	0.0657306	0.05858	0.0130933	0.0166741	0.0156358	0.0118545	0.03043	0.0278809	0.0382155	0.0340581	1.19255	3.66941
PE(16_0_14_1)	660.461	A	0.00706319	0.0088382	0.0100062	0.0129839	0.0114294	0.0150689	0.0152859	0.0162378	0.00271661	0.00339931	0.00384856	0.00499381	0.00664503	0.00876098	0.00888713	0.00944058	1.19561	2.84307
PI(18_0_20_2)	889.581	A	2.67917	2.84532	2.8323	2.69315	4.30617	3.87748	4.39309	4.25563	1.03045	1.09436	1.08934	1.03583	2.50358	2.25435	2.55412	2.4742	1.20223	6.67583
Cer(d18_1_20_0)	652.589	A	0.00895278	0.0090947	0.00965329	0.0077373	0.0142319	0.0116689	0.0142434	0.0138841	0.00344338	0.00349796	0.0037128	0.00297588	0.00827434	0.00678427	0.00828103	0.00807215	1.20436	4.78107
TG(18_1_20_2_22_2)	982.88	A	0.222368	0.291863	0.256211	0.186194	0.340709	0.30671	0.422751	0.382285	0.0855261	0.112255	0.0985428	0.071613	0.198087	0.17832	0.245786	0.222259	1.20798	3.3867
PI(18_0_18_2)	863.564	B	0.170223	0.171684	0.170956	0.169479	0.249398	0.254001	0.26392	0.276634	0.0654705	0.0660324	0.0657523	0.0651842	0.144999	0.147675	0.153442	0.160834	1.20847	7.53236
dMePE(15_0_16_0)	704.524	B	0.00846179	0.00893526	0.0101537	0.00656239	0.00821639	0.0139131	0.0179133	0.0135024	0.00325453	0.00343664	0.00390526	0.002524	0.00477697	0.008089	0.0104147	0.00785023	1.21019	2.37976
Cer(d18_1_22_0)	680.62	B	0.02436	0.0234494	0.0249523	0.0228841	0.037766	0.0318694	0.0378575	0.0394585	0.00936922	0.009019	0.00959702	0.00880157	0.021957	0.0185287	0.0220101	0.022941	1.21175	5.48788
dMePE(16_0_14_0)	690.508	B	0.0218847	0.0233617	0.0241174	0.0208144	0.0325718	0.034767	0.0363	0.0355969	0.00841718	0.00898527	0.00927591	0.00800556	0.0189371	0.0202134	0.0211047	0.0206958	1.22394	6.10959
Hex1Cer(t18_0_24_1)	886.699	C	0.0189912	0.0204785	0.0218177	0.0166681	0.0305071	0.0265244	0.0330239	0.0301967	0.0073043	0.00787636	0.00839143	0.00641081	0.0177367	0.0154212	0.0191999	0.0175562	1.22419	4.59355
Hex1Cer(d18_1_24_0	828.692	A	0.0740427	0.0855599	0.0876278	0.0697013	0.119687	0.107589	0.134015	0.129446	0.028478	0.0329077	0.033703	0.0268082	0.0695856	0.0625515	0.0779155	0.0752591	1.22845	4.59175
DG(16_2e_18_1)	577.519	C	0.112349	0.128364	0.125921	0.115223	0.196177	0.170571	0.201026	0.180071	0.0432113	0.0493706	0.048431	0.0443167	0.114056	0.0991692	0.116876	0.104693	1.22943	5.57427
PE(18_0_20_2)	770.571	A	1.88117	1.96435	2.00104	1.96359	3.16874	2.6991	3.25386	3.04178	0.723527	0.755521	0.769633	0.755228	1.84229	1.56924	1.89178	1.76848	1.23198	5.95623
Cer(d18_1_22_1)	678.604	B	0.00534403	0.00558198	0.00584993	0.00493501	0.00943563	0.00675257	0.00865135	0.00913931	0.0020554	0.00214691	0.00224997	0.00189808	0.00548583	0.00392591	0.00502986	0.00531355	1.2332	4.27849
FA 17_0	269.249	D	0.0706659	0.0690119	0.0618017	0.0508794	0.0999526	0.0950287	0.100131	0.0947192	0.0271792	0.026543	0.0237699	0.019569	0.058112	0.0552493	0.0582155	0.0550693	1.23473	4.51774
TG(16_1_16_1_20_4)	851.712	A	0.531252	0.682173	0.616475	0.487895	0.795203	0.857388	1.0045	0.939152	0.204328	0.262374	0.237106	0.187652	0.462328	0.498482	0.584015	0.546019	1.23633	4.0964
PC(20_0_18_2)	814.632	C	1.98636	1.94225	2.20227	1.99726	3.21975	2.65088	3.57692	3.28809	0.763985	0.74702	0.847027	0.768176	1.87195	1.54121	2.07961	1.91168	1.23723	4.77342
Cer(d18_1_24_3)	702.604	A	0.00028178	0.000305411	0.000147124	0.000275173	0.00057114	0.000396131	0.000238845	0.000384991	0.000108377	0.000117466	5.6586e-05	0.000105836	0.000332058	0.000230309	0.000138863	0.000223832	1.24052	1.89131
AcCa(16_0)	400.342	A	0.0568738	0.0630775	0.0642193	0.075787	0.0845294	0.122022	0.11346	0.0904896	0.0218745	0.0242606	0.0246997	0.0291489	0.049145	0.0709429	0.0659652	0.0526102	1.24624	3.73186
PC(20_1_18_1)	836.614	A	0.159397	0.157941	0.165538	0.175201	0.248619	0.245391	0.274671	0.264374	0.0613064	0.0607466	0.0636685	0.067385	0.144546	0.142669	0.159692	0.153706	1.24638	6.50535
LPC(20_1)	608.393	A	0.0178129	0.0179907	0.0221862	0.0192157	0.0307071	0.0243908	0.0308616	0.0359072	0.00685112	0.00691948	0.00853316	0.00739064	0.017853	0.0141807	0.0179428	0.0208763	1.24682	4.01773
TG(18_1_18_1_22_6)	948.802	A	0.0480516	0.0621001	0.0450128	0.0438385	0.0781035	0.0624281	0.0884548	0.0844591	0.0184814	0.0238847	0.0173126	0.016861	0.045409	0.0362954	0.0514272	0.0491041	1.25337	3.64025
FA 24_0	367.358	D	0.014747	0.0148159	0.0137227	0.01286	0.0207921	0.0223256	0.0242427	0.0211987	0.00567193	0.00569843	0.00527796	0.00494615	0.0120885	0.01298	0.0140946	0.0123248	1.25341	5.73766
CL(18_1_18_1_18_1_18_0)	1458.04	A	0.0160431	0.0141943	0.0219927	0.0324895	0.0313328	0.0255681	0.0345578	0.0364982	0.00617042	0.00545936	0.00845874	0.012496	0.0182167	0.0148652	0.0200917	0.0212199	1.25475	2.30715
PC(18_4_20_4)	802.538	C	0.00108333	0.00128315	0.00186054	0.00115651	0.001695	0.0021058	0	0.00251284	0.000416665	0.00049352	0.000715591	0.000444812	0.000985463	0.0012243	0	0.00146095	1.25593	2.41204
TG(18_1_22_3_24_1)	1038.94	A	0.0295765	0.0357045	0.0328494	0.024229	0.0484496	0.0396519	0.0555926	0.0490468	0.0113756	0.0137325	0.0126344	0.00931886	0.0281683	0.0230534	0.0323213	0.0285156	1.25604	3.68731
PE(16_0_18_1)	716.524	A	3.92338	4.29497	4.51434	4.21768	6.67906	6.29866	6.64464	7.20596	1.50899	1.65191	1.73629	1.62219	3.88318	3.66201	3.86316	4.18951	1.25869	6.20848
PC(18_0_20_2)	872.639	A	1.59202	1.5406	1.60347	1.53603	2.53861	2.2846	2.51246	2.63281	0.612315	0.59254	0.616721	0.590781	1.47593	1.32826	1.46073	1.5307	1.26283	6.78586
MePC(16_1_20_4)	816.551	C	0.0387687	0.0388922	0.0416284	0.0417343	0.0623221	0.0640238	0.0631348	0.0673395	0.014911	0.0149585	0.0160109	0.0160516	0.0362338	0.0372231	0.0367063	0.0391509	1.26987	7.29743
PE(20_1_20_1)	800.616	A	0.100726	0.0999116	0.103533	0.0938453	0.1656	0.128583	0.182064	0.163447	0.0387409	0.0384275	0.0398203	0.0360944	0.0962788	0.0747573	0.105851	0.0950273	1.27012	4.57363
PE(18_1_18_1)	744.554	A	7.44203	7.96114	7.88382	7.46458	11.9431	11.087	13.6287	12.6248	2.86232	3.06198	3.03224	2.87099	6.94368	6.44594	7.92365	7.34001	1.27311	5.82608
CL(18_2_18_2_18_2_18_1)	1449.98	A	0.0801615	0.0745251	0.00424474	0.120014	0.0733528	0.0700163	0.0572133	0.0684418	0.0308314	0.0286635	0.00163259	0.0461593	0.042647	0.0407072	0.0332635	0.0397918	1.27717	0.530579
PE(8_1e_10_0)	480.308	C	0.217799	0.194898	0.213328	0.177554	0.327493	0.265768	0.365408	0.335125	0.0837687	0.0749607	0.0820491	0.0682899	0.190403	0.154516	0.212447	0.19484	1.2783	4.42558
TG(16_0_16_1_22_5)	896.77	A	0.212	0.24976	0.228998	0.19011	0.306715	0.323668	0.399154	0.392779	0.0815384	0.0960614	0.0880761	0.0731191	0.178323	0.188179	0.232066	0.22836	1.28493	4.25127
AcCa(18_2)	424.342	A	0.00152373	0.00163122	0.00200542	0.00252133	0.00218334	0.00417074	0.00373629	0.0025873	0.000586052	0.000627394	0.000771315	0.000969744	0.00126939	0.00242485	0.00217226	0.00150424	1.29816	2.49594
Cer(d18_0_18_1)	624.557	B	0.000221505	0.000168158	0.00019231	0.000237145	0.000361424	0.000300453	0.000333035	0.000329785	8.51944e-05	6.46762e-05	7.39654e-05	9.12095e-05	0.00021013	0.000174682	0.000193625	0.000191736	1.29873	4.37394
PE(20_1_18_2)	792.551	C	0.187443	0.172397	0.167819	0.167874	0.282398	0.266928	0.293215	0.292725	0.0720935	0.0663065	0.0645459	0.0645669	0.164185	0.155191	0.170474	0.170189	1.30341	6.71426
Cer(t17_0_25_1)	724.646	A	0.00939318	0.0099864	0.00956461	0.0078112	0.0157414	0.01295	0.0159626	0.0154554	0.00361276	0.00384092	0.00367869	0.00300431	0.00915199	0.00752908	0.00928057	0.00898569	1.3069	4.77568
LPE(16_0)	452.278	A	0.23861	0.243093	0.262492	0.224742	0.409538	0.317622	0.445427	0.431789	0.091773	0.0934975	0.100959	0.0864392	0.238104	0.184664	0.258969	0.25104	1.31363	4.45773
Hex1Cer(d18_2_24_0	826.677	A	0.02981	0.0274321	0.0319408	0.0327945	0.0928676	0.0247343	0.0921054	0.0296032	0.0114654	0.0105508	0.0122849	0.0126133	0.0539928	0.0143804	0.0535496	0.0172112	1.31366	1.354
Cer(d15_0_24_1)	666.604	B	0.00153594	0.00190119	0.00200092	0.00167329	0.00285698	0.00280941	0.00293845	0.00303337	0.000590745	0.000731228	0.000769585	0.000643573	0.00166103	0.00163338	0.0017084	0.00176359	1.31394	5.18524
Cer(d18_1_24_1)	706.635	A	0.0780575	0.0734351	0.0834206	0.0733526	0.13618	0.104893	0.132542	0.135671	0.0300221	0.0282443	0.0320848	0.0282125	0.0791743	0.0609843	0.0770591	0.0788785	1.31421	4.89692
Cer(t18_0_22_0)	622.613	B	0.0225143	0.0192127	0.0226286	0.0191748	0.0356725	0.0311582	0.035479	0.0358181	0.00865936	0.0073895	0.0087033	0.00737492	0.0207398	0.0181152	0.0206273	0.0208245	1.32406	5.40604
DG(16_2e_16_1)	549.488	C	0.0793235	0.0908712	0.0997418	0.0977297	0.154225	0.11669	0.164761	0.178339	0.030509	0.0349505	0.0383622	0.0375884	0.0896657	0.067843	0.0957912	0.103685	1.32407	3.8877
DG(18_2e_20_2)	631.566	C	0.203425	0.21831	0.222781	0.202934	0.324723	0.314416	0.400633	0.371969	0.0782404	0.0839655	0.0856849	0.0780515	0.188792	0.1828	0.232926	0.216261	1.32656	5.23314
TG(18_1_14_3_18_1)	847.679	A	0.00974698	0.0176317	0.0140393	0.0111064	0.0180396	0.0197787	0.0248123	0.0229605	0.00374884	0.00678141	0.00539972	0.0042717	0.0104881	0.0114993	0.0144258	0.0133491	1.32692	3.07603
PS(16_0_16_1)	732.482	A	0.294521	0.317271	0.343417	0.326395	0.427925	0.459638	0.663165	0.614428	0.113277	0.122027	0.132084	0.125536	0.248794	0.267231	0.385561	0.357226	1.33005	3.76125
Cer(t18_0_20_0)	594.582	B	0.00899156	0.0103189	0.00899796	0.00880071	0.015125	0.0154819	0.0146816	0.0163791	0.00345829	0.00396879	0.00346075	0.00338489	0.00879358	0.00900108	0.00853583	0.00952273	1.33062	6.15978
Cer(d17_1_24_1)	692.62	A	0.0179564	0.0170856	0.0190422	0.0158683	0.0303852	0.0245013	0.0303971	0.0315427	0.0069063	0.00657137	0.00732392	0.0061032	0.0176658	0.0142449	0.0176727	0.0183388	1.33231	4.95381
TG(16_0e_14_0_22_5)	856.775	B	0.00307774	0.0168958	0.00221448	0.0051896	0.00622376	0.00763127	0.00915492	0.0106912	0.00118375	0.00649839	0.000851722	0.001996	0.00361846	0.00443678	0.00532263	0.00621583	1.33599	1.04054
PE(22_6_23_1)	882.598	C	0.109592	0.103539	0.106984	0.108214	0.17849	0.152441	0.19953	0.190347	0.0421506	0.0398227	0.0411478	0.0416207	0.103773	0.0886286	0.116006	0.110667	1.34004	5.33945
PE(16_0_16_0)	690.508	A	0.10775	0.1216	0.119719	0.115105	0.187465	0.174277	0.206852	0.211173	0.0414423	0.0467693	0.0460459	0.044271	0.108991	0.101324	0.120263	0.122775	1.34175	5.69758
Cer(d18_1_24_2)	644.599	A	0.000761739	0.000639484	0.000787877	0.000558665	0.00125653	0.000912767	0.00121492	0.00124635	0.000292976	0.000245955	0.00030303	0.000214871	0.000730539	0.000530679	0.00070635	0.000724621	1.35058	3.82073
PG(16_1_16_1)	717.471	B	0.0171494	0.0160576	0.019205	0.0172269	0.0280848	0.0241727	0.0336086	0.0325305	0.00659594	0.00617601	0.00738654	0.00662575	0.0163284	0.0140539	0.0195399	0.0189131	1.35266	4.5054
Cer(d18_0_22_0)	682.635	A	0.00227253	0.00243506	0.0025416	0.00223885	0.00399044	0.00357184	0.00427371	0.00432549	0.000874048	0.000936562	0.000977539	0.000861094	0.00232003	0.00207665	0.00248472	0.00251482	1.36231	5.69576
PE(20_0_18_2)	794.567	C	0.180503	0.180109	0.181173	0.176313	0.288021	0.29134	0.326897	0.318164	0.0694242	0.0692728	0.0696818	0.0678128	0.167454	0.169384	0.190057	0.184979	1.36387	6.98897
TG(16_0_16_0_20_5)	853.728	A	1.17291	1.50709	1.39242	1.10595	1.91164	2.31018	2.32539	2.25804	0.451121	0.579649	0.535544	0.425366	1.11142	1.34313	1.35197	1.31282	1.36876	4.48428
TG(20_1e_16_0_18_1)	890.854	B	0.0681277	0.105389	0.0831987	0.0656661	0.119259	0.116522	0.165374	0.145927	0.026203	0.0405342	0.0319995	0.0252562	0.0693364	0.0677452	0.096148	0.0848412	1.37005	3.34561
TG(18_1_22_1_22_3)	1010.91	A	0.0637226	0.0979908	0.0778831	0.0572069	0.119408	0.105781	0.143751	0.131047	0.0245087	0.0376888	0.029955	0.0220027	0.0694231	0.0615008	0.0835762	0.0761898	1.3702	3.37673
LPE(24_1)	562.388	A	0.0109159	0.0129154	0.0126648	0.0118164	0.021646	0.0162877	0.022617	0.0230613	0.00419843	0.00496746	0.00487108	0.00454475	0.0125849	0.0094696	0.0131494	0.0134077	1.37701	4.39319
Hex1Cer(d18_1_24_1)	868.688	A	0.0219173	0.0213419	0.0232121	0.0217926	0.0399127	0.0291243	0.0427234	0.0415836	0.00842975	0.00820843	0.00892774	0.00838176	0.0232051	0.0169327	0.0248392	0.0241765	1.37751	4.36272
DG(16_1_14_0)	556.494	A	0.0211866	0.024379	0.0328852	0.0311832	0.0426175	0.0412132	0.0499451	0.0527578	0.0081487	0.00937652	0.0126481	0.0119935	0.0247776	0.0239612	0.0290379	0.0306731	1.37792	3.68452
Hex1Cer(t18_1_26_3)	832.666	C	0.0483345	0.053558	0.0517805	0.0446725	0.0784377	0.0732093	0.0981784	0.0928595	0.0185902	0.0205992	0.0199156	0.0171817	0.0456033	0.0425635	0.0570805	0.0539881	1.37812	4.6818
TG(16_0_18_2_22_5)	922.786	A	0.167824	0.200818	0.184768	0.153303	0.281125	0.278078	0.32855	0.334302	0.0645476	0.0772376	0.0710646	0.0589629	0.163445	0.161673	0.191018	0.194362	1.38836	4.81165
TG(16_0_18_2_20_5)	899.71	A	0.0286267	0.026036	0.0266338	0.0192975	0.0348345	0.044156	0.0454937	0.0492811	0.0110103	0.0100138	0.0102438	0.00742212	0.0202526	0.0256721	0.0264498	0.0286518	1.38868	3.8082
Cer(d20_1_22_1)	670.611	C	0.0620473	0.0575736	0.0604107	0.0545324	0.106811	0.0881738	0.109929	0.103033	0.0238643	0.0221437	0.0232349	0.020974	0.0620995	0.0512639	0.063912	0.0599026	1.39115	5.57465
PE(8_0e_8_0)	454.293	C	0.111747	0.104813	0.116732	0.107599	0.187607	0.163791	0.218814	0.204753	0.0429798	0.0403125	0.0448971	0.0413842	0.109074	0.0952276	0.127217	0.119042	1.40266	5.18025
PI(16_0_16_1)	807.503	A	1.09482	0.962895	1.27365	0.976886	1.85072	1.57166	2.14869	1.96967	0.421083	0.370344	0.489865	0.375725	1.076	0.913758	1.24924	1.14516	1.40371	4.3637
FA 17_1	267.233	D	0.0147256	0.0133347	0.012738	0.00873596	0.0234986	0.0196996	0.021095	0.0210722	0.00566368	0.00512872	0.00489924	0.00335998	0.013662	0.0114533	0.0122645	0.0122513	1.40493	3.72717
TG(19_1_18_1_20_2)	942.848	A	0.134553	0.178326	0.1601	0.115946	0.233907	0.210011	0.302157	0.284979	0.051751	0.0685869	0.0615767	0.0445946	0.135992	0.122099	0.175673	0.165685	1.40796	3.58914
FA 20_2	307.264	D	0.113406	0.114862	0.118372	0.0687129	0.206406	0.140138	0.194619	0.18212	0.0436177	0.0441777	0.0455277	0.0264281	0.120004	0.0814758	0.11315	0.105884	1.41473	3.12673
TG(16_0_12_0_22_5)	842.723	A	0.034373	0.0444587	0.0387901	0.0324755	0.0612311	0.0561199	0.0724717	0.075798	0.0132204	0.0170995	0.0149193	0.0124906	0.0355995	0.0326278	0.0421347	0.0440686	1.4195	4.21745
PE(20_0_18_1)	772.586	A	0.225837	0.240592	0.253459	0.224923	0.434505	0.368703	0.451487	0.427764	0.0868602	0.0925354	0.0974843	0.0865087	0.252619	0.214362	0.262492	0.2487	1.42617	5.82675
TG(24_1_14_2_24_1)	1017.88	A	0.0287864	0.0403193	0.0350733	0.0237689	0.0543851	0.049148	0.0648241	0.055874	0.0110717	0.0155074	0.0134897	0.0091419	0.0316192	0.0285744	0.0376884	0.0324849	1.42679	3.59298
LPE(18_0)	480.31	A	0.646676	0.656218	0.691023	0.607866	1.18953	0.936646	1.28268	1.25301	0.248722	0.252392	0.265778	0.233795	0.691587	0.544562	0.745745	0.728495	1.42824	4.87325
TG(18_1e_16_0_17_0)	850.822	B	0.0564461	0.0815741	0.0674328	0.0463377	0.09757	0.0905136	0.135316	0.120977	0.02171	0.0313747	0.0259357	0.0178222	0.0567268	0.0526242	0.0786722	0.0703355	1.42832	3.19288
Cer(t18_0_16_0)	614.537	A	0.00640925	0.00621395	0.00604674	0.00499222	0.0116465	0.0094986	0.0102548	0.0107945	0.0024651	0.00238998	0.00232567	0.00192009	0.00677125	0.00552244	0.00596208	0.00627589	1.43323	5.08783
LPC(14_0)	526.315	A	0.0169151	0.0154452	0.0188038	0.0142315	0.0306367	0.0241139	0.0292276	0.0334359	0.0065058	0.00594047	0.00723224	0.00547366	0.017812	0.0140197	0.0169928	0.0194395	1.43817	4.45161
TG(17_0_18_1_20_2)	921.788	A	0.0804767	0.0958173	0.0843323	0.0740356	0.13524	0.149892	0.1627	0.157199	0.0309526	0.0368528	0.0324355	0.0284752	0.0786279	0.0871466	0.0945933	0.0913947	1.45331	5.25466
PC(15_0_14_0)	750.529	A	0.834399	0.884418	0.9224	0.852	1.57706	1.51935	1.57591	1.66045	0.320923	0.340161	0.354769	0.327692	0.916897	0.883344	0.916224	0.965381	1.45472	7.45694
TG(14_0e_16_0_18_1)	808.775	B	0.287355	0.425808	0.349169	0.216255	0.48419	0.476361	0.690174	0.642429	0.110521	0.163772	0.134296	0.0831749	0.281506	0.276954	0.401264	0.373505	1.46321	2.96088
Cer(t18_0_24_1)	630.618	C	0.0145234	0.0136033	0.0163583	0.0116865	0.0252185	0.0215007	0.0279281	0.0278762	0.00558591	0.00523204	0.00629166	0.0044948	0.0146619	0.0125004	0.0162373	0.0162071	1.46671	4.45137
PC(16_0_13_0)	692.523	C	0.690714	0.714848	0.759642	0.706102	1.27579	1.16068	1.49139	1.3934	0.265659	0.274941	0.29217	0.271578	0.741737	0.674813	0.867085	0.810115	1.48071	5.67644
DG(18_0_20_1)	668.619	B	0.142924	0.151129	0.171859	0.144838	0.260728	0.231199	0.329203	0.328283	0.0549709	0.0581266	0.0660995	0.0557071	0.151586	0.134418	0.191397	0.190862	1.49583	4.39453
TG(18_0_18_1_20_3)	928.833	A	1.53586	2.09597	1.76634	1.21135	2.75027	2.59735	3.60574	3.26411	0.590716	0.806142	0.679362	0.465905	1.59899	1.51009	2.09636	1.89774	1.49849	3.53705
TG(18_0e_16_0_18_1)	864.838	B	0.165727	0.249197	0.193808	0.145803	0.306542	0.303316	0.408872	0.390703	0.063741	0.0958451	0.0745416	0.0560783	0.178222	0.176346	0.237717	0.227153	1.51357	3.54082
PE(8_0e_10_0)	482.324	C	0.299307	0.27354	0.310003	0.292698	0.536743	0.481885	0.627827	0.584708	0.115118	0.105208	0.119232	0.112576	0.31206	0.280165	0.365016	0.339947	1.51509	5.53437
TG(18_1e_16_0_16_0)	836.807	B	0.424862	0.673172	0.545029	0.392367	0.788632	0.835276	1.14293	1.07685	0.163408	0.258912	0.209626	0.15091	0.458507	0.485626	0.664493	0.626076	1.52823	3.3421
PI(18_0_18_1)	863.566	A	2.33341	2.44755	2.42047	2.29748	4.3987	4.31484	4.82738	4.66115	0.897465	0.941365	0.930949	0.883644	2.55739	2.50863	2.80662	2.70997	1.5334	7.48213
TG(16_1_17_1_18_1)	860.77	A	0.293115	0.392237	0.347373	0.265199	0.55215	0.539526	0.714908	0.672958	0.112737	0.15086	0.133605	0.102	0.321018	0.313678	0.415644	0.391254	1.53567	4.11042
PE(16_0_22_1)	796.583	C	0.0468865	0.052589	0.0549951	0.0536495	0.110065	0.0880543	0.107789	0.0985258	0.0180333	0.0202265	0.021152	0.0206344	0.0639913	0.0511943	0.0626678	0.0572825	1.55173	5.63322
FA 14_1	225.186	D	0.0072268	0.00682231	0.00640989	0.00359306	0.0132428	0.00844452	0.0127226	0.0115136	0.00277954	0.00262396	0.00246534	0.00138194	0.00769932	0.0049096	0.00739686	0.00669396	1.55876	2.88073
DG(33_1_16_0)	822.791	B	0.0629452	0.100195	0.072966	0.0531026	0.137295	0.122125	0.149885	0.14175	0.0242097	0.0385366	0.0280639	0.0204241	0.0798225	0.0710029	0.0871425	0.0824129	1.56253	3.58525
PG(18_0_20_2)	801.565	B	0.0113358	0.00804971	0.0113674	0.00971992	0.0205049	0.018486	0.0202792	0.0204915	0.00435992	0.00309604	0.00437208	0.00373843	0.0119214	0.0107477	0.0117902	0.0119136	1.58751	4.87134
FA 16_1	253.217	D	0.123941	0.119587	0.121018	0.0812813	0.274731	0.166138	0.23804	0.217363	0.0476695	0.0459951	0.0465452	0.0312621	0.159727	0.0965919	0.138395	0.126374	1.60055	3.56504
FA 19_1	295.264	D	0.0186008	0.0177187	0.0201301	0.0133649	0.040341	0.0290713	0.0372182	0.0337067	0.00715416	0.00681489	0.00774235	0.00514033	0.0234541	0.0169019	0.0216385	0.0195969	1.60922	4.19024
PE(15_0_16_0)	676.492	A	0.0553654	0.0621423	0.0619564	0.0556471	0.113296	0.113516	0.128675	0.121336	0.0212944	0.0239009	0.0238294	0.0214027	0.0658698	0.0659976	0.0748113	0.0705442	1.61644	6.59854
AcCa(17_1)	412.342	A	0.00100426	0.000349028	0.0011178	0.000332742	0.00117777	0.00163758	0.00191301	0.000599568	0.000386253	0.000134241	0.000429922	0.000127978	0.000684752	0.000952084	0.00111222	0.000348586	1.6173	1.44144
TG(16_1_16_1_17_1)	832.739	A	0.0952484	0.12726	0.1149	0.0895047	0.18417	0.18573	0.257814	0.2419	0.036634	0.0489462	0.0441923	0.0344249	0.107076	0.107983	0.149892	0.14064	1.62036	4.07829
PI(16_1_14_0)	779.472	A	0.0216155	0.0175482	0.0228369	0.0226044	0.0407426	0.0356128	0.0534077	0.0438864	0.00831364	0.0067493	0.00878342	0.00869401	0.0236876	0.0207051	0.031051	0.0255154	1.6257	4.42166
TG(16_1_14_2_18_1)	816.708	A	0.0509173	0.0684887	0.0586909	0.0437694	0.0981367	0.0953978	0.132884	0.125527	0.0195836	0.0263418	0.0225734	0.0168344	0.0570562	0.0554639	0.0772582	0.0729808	1.62703	3.93104
AcCa(18_1)	426.358	A	0.0146834	0.0170382	0.0170841	0.0216949	0.0282087	0.0456968	0.0419646	0.030108	0.00564744	0.00655314	0.00657079	0.00834419	0.0164004	0.0265679	0.024398	0.0175047	1.62975	3.63969
DG(18_0_20_2)	666.603	B	0.598314	0.659606	0.685357	0.630012	1.21557	1.19323	1.53361	1.35779	0.230121	0.253695	0.263599	0.242312	0.706727	0.693737	0.891635	0.789415	1.63302	5.64103
FA 14_0	227.202	D	0.133454	0.127646	0.115359	0.0913123	0.261505	0.207769	0.242969	0.244044	0.0513285	0.0490945	0.0443688	0.0351201	0.152038	0.120796	0.141261	0.141886	1.63766	4.61224
PS(16_0_18_1)	762.528	A	0.233426	0.237796	0.274827	0.236097	0.479836	0.455376	0.562978	0.542533	0.0897793	0.0914601	0.105703	0.0908066	0.278974	0.264754	0.327313	0.315426	1.64905	5.7364
FA 22_2	335.296	D	0.00730507	0.00784657	0.00760029	0.00644609	0.0170306	0.0130431	0.0163703	0.0144882	0.00280964	0.00301791	0.00292319	0.00247927	0.0099015	0.00758317	0.00951759	0.00842339	1.65351	5.32573
Cer(d18_0_16_0)	598.542	A	0.0189767	0.0209471	0.0185353	0.0128941	0.0401136	0.0310098	0.0399513	0.0368178	0.00729874	0.00805659	0.00712896	0.00495927	0.0233219	0.018029	0.0232275	0.0214057	1.66298	4.09479
FA 24_1	365.342	D	0.0151148	0.0142739	0.016159	0.0146414	0.0342021	0.0280876	0.0344938	0.0303912	0.00581338	0.00548994	0.006215	0.00563132	0.019885	0.01633	0.0200545	0.0176693	1.67167	6.07053
TG(19_0_18_1_22_3)	970.88	B	0.0358535	0.0443478	0.0373228	0.0287654	0.0743164	0.064615	0.0893539	0.0823041	0.0137898	0.0170569	0.0143549	0.0110636	0.0432072	0.0375668	0.0519499	0.0478512	1.68877	4.32119
TG(16_0_16_1_18_2)	846.755	A	1.59716	2.19641	1.91441	1.39785	3.32887	3.33955	4.72017	4.26501	0.61429	0.844773	0.73631	0.537636	1.93539	1.9416	2.74428	2.47966	1.73993	3.99868
TG(18_3_14_1_18_3)	821.665	A	0.0144938	0.0225319	0.0187741	0.0160898	0.0355439	0.0345257	0.0451616	0.0438683	0.00557454	0.0086661	0.0072208	0.0061884	0.0206651	0.0200731	0.0262568	0.0255048	1.75192	4.29453
TG(15_0_18_1_20_4)	867.744	A	0.206747	0.244331	0.23841	0.186545	0.425216	0.484635	0.528787	0.509486	0.079518	0.0939736	0.091696	0.0717482	0.247218	0.281764	0.307434	0.296213	1.75289	5.31413
TG(19_1_16_1_18_1)	888.802	A	0.486023	0.636309	0.570412	0.416751	1.04105	1.01374	1.35447	1.28896	0.186932	0.244734	0.219389	0.160289	0.60526	0.589384	0.787484	0.749398	1.75796	4.31168
TG(18_0_18_1_20_2)	935.804	A	0.274585	0.340789	0.307685	0.239627	0.615042	0.654785	0.731285	0.697725	0.105609	0.131073	0.11834	0.0921641	0.357583	0.380689	0.425165	0.405654	1.82021	5.24313
TG(18_1_20_2_24_1)	1012.93	A	0.0633559	0.0930962	0.0806374	0.0569502	0.159328	0.143279	0.196559	0.180351	0.0243676	0.0358062	0.0310144	0.0219039	0.0926324	0.0833015	0.114279	0.104855	1.82134	4.1337
TG(16_0e_16_0_17_0)	824.807	B	0.0351041	0.0560486	0.0447682	0.0297646	0.085422	0.0819697	0.11143	0.100967	0.0135016	0.0215571	0.0172185	0.0114479	0.0496639	0.0476568	0.0647846	0.0587017	1.8234	3.71936
FA 18_1	281.249	D	0.722809	0.682187	0.67585	0.435578	1.6789	1.17061	1.57993	1.40818	0.278004	0.262379	0.259942	0.16753	0.976103	0.680586	0.918565	0.81871	1.82429	3.96085
TG(16_0e_14_0_16_1)	780.744	B	0.0631421	0.0963559	0.0781824	0.0515802	0.142923	0.14152	0.201047	0.182113	0.0242854	0.03706	0.0300702	0.0198385	0.0830948	0.0822792	0.116888	0.10588	1.82503	3.6481
TG(15_0_16_1_20_4)	839.712	A	0.12771	0.160825	0.147641	0.121716	0.279569	0.314731	0.36466	0.349206	0.0491191	0.0618556	0.0567851	0.046814	0.16254	0.182983	0.212012	0.203027	1.8271	5.16743
TG(18_1_18_1_22_2)	956.864	A	0.435719	0.597466	0.516049	0.351263	1.00155	0.920202	1.31123	1.19079	0.167584	0.229795	0.19848	0.135101	0.582296	0.535001	0.762344	0.692318	1.82873	3.99716
PC(14_0_13_0)	722.498	C	0.0154926	0.0160203	0.0187296	0.0149654	0.035865	0.0352429	0.0409307	0.0411507	0.00595869	0.00616165	0.0072037	0.0057559	0.0208517	0.0204901	0.0237969	0.0239248	1.83	5.94336
TG(20_1_18_1_22_2)	984.895	A	0.14155	0.197441	0.158038	0.116075	0.343315	0.301453	0.422641	0.399345	0.0544423	0.0759388	0.0607837	0.0446441	0.199602	0.175264	0.245721	0.232178	1.86872	4.14362
TG(16_0_18_1_18_2)	874.786	A	3.61217	5.15859	4.43127	3.16599	8.42993	8.55484	11.687	10.8341	1.3893	1.98407	1.70434	1.21769	4.90112	4.97374	6.79478	6.29889	1.8777	4.12639
PG(18_1_18_1)	797.53	A	0.0284394	0.0298959	0.0281646	0.0265621	0.0660134	0.05962	0.0791161	0.0714339	0.0109382	0.0114984	0.0108326	0.0102162	0.0383799	0.0346628	0.0459978	0.0415313	1.87811	6.01036
TG(16_0_14_0_18_2)	825.694	A	0.577906	0.779959	0.673463	0.51814	1.33885	1.53753	1.73783	1.65377	0.222271	0.299984	0.259024	0.199285	0.778402	0.893915	1.01037	0.961496	1.9044	4.79025
LPE(20_1)	506.325	A	0.0303224	0.0307071	0.0319151	0.0260246	0.0757829	0.0555142	0.0857096	0.0819559	0.0116624	0.0118104	0.012275	0.0100095	0.0440598	0.0322757	0.0498312	0.0476488	1.91009	4.75217
PC(16_1_14_0)	762.529	A	0.96088	0.989426	0.995671	0.963167	2.33024	2.2177	2.52921	2.69651	0.369569	0.380549	0.38295	0.370449	1.35479	1.28936	1.47047	1.56774	1.91426	7.03873
PI(18_0_22_2)	917.612	A	0.0653189	0.079313	0.0764568	0.0721514	0.185996	0.168648	0.187097	0.188613	0.0251226	0.030505	0.0294064	0.0277505	0.108137	0.0980512	0.108777	0.109659	1.91497	6.73304
TG(16_1_16_1_16_1)	818.723	A	0.377768	0.519773	0.465424	0.32897	0.906973	0.902799	1.26661	1.18866	0.145295	0.199913	0.179009	0.126527	0.52731	0.524883	0.736403	0.691084	1.93554	4.20681
PC(14_0_14_0)	736.513	A	0.315783	0.343961	0.373921	0.318255	0.824023	0.798311	0.928911	0.926225	0.121455	0.132293	0.143816	0.122406	0.479083	0.464134	0.540065	0.538503	1.95921	6.50378
PC(16_0_12_0)	678.507	C	0.79856	0.87425	0.877919	0.810781	2.05762	1.95595	2.53852	2.31458	0.307138	0.33625	0.337661	0.311839	1.19629	1.13718	1.47588	1.34568	1.98922	6.19722
PS(16_0_16_0)	734.498	A	0.00520049	0.0125272	0.0133505	0.0113425	0.0308456	0.0246792	0.0262332	0.0242509	0.00200019	0.00481817	0.0051348	0.00436251	0.0179335	0.0143484	0.0152519	0.0140993	2.00045	3.06539
dMePE(14_0_14_0)	662.477	B	0.00502488	0.00539761	0.00574372	0.00582612	0.0137498	0.0134778	0.0161753	0.0158714	0.00193265	0.002076	0.00220912	0.00224081	0.00799409	0.00783592	0.00940423	0.00922756	2.0241	6.47562
TG(17_0_18_1_18_3)	869.759	A	0.171753	0.208225	0.193313	0.147255	0.417717	0.495137	0.52163	0.507593	0.0660587	0.0800865	0.0743513	0.0566367	0.242859	0.28787	0.303273	0.295112	2.03343	5.34801
PI(19_0_20_2)	903.597	A	0.0453661	0.0670658	0.050175	0.049111	0.144217	0.132757	0.14794	0.154915	0.0174485	0.0257945	0.0192981	0.0188889	0.0838473	0.0771843	0.0860118	0.0900671	2.06386	5.36468
PE(8_1e_12_0)	508.34	C	0.0123023	0.0112682	0.0125162	0.0118639	0.0342019	0.027929	0.0397064	0.0367974	0.00473166	0.00433394	0.00481392	0.00456305	0.0198848	0.0162378	0.0230851	0.0213938	2.11692	5.80118
PG(17_0_18_1)	761.534	B	0.00762629	0.0150961	0.0167797	0.0152886	0.032806	0.0314084	0.0412119	0.047309	0.00293319	0.00580618	0.00645373	0.00588023	0.0190733	0.0182607	0.0239604	0.0275053	2.11807	3.41354
PC(11_0_16_0)	664.491	C	0.0103642	0.0142751	0.0129386	0.0115779	0.0339452	0.0324641	0.0427458	0.0368906	0.00398625	0.00549042	0.00497639	0.00445303	0.0197356	0.0188745	0.0248522	0.021448	2.16933	5.47818
PC(14_0_18_2)	788.545	A	0.169745	0.149165	0.170363	0.165962	0.500829	0.425577	0.539042	0.494225	0.0652866	0.0573712	0.0655243	0.0638316	0.291179	0.247429	0.313397	0.28734	2.17349	6.64172
TG(16_0_18_1_20_2)	902.817	A	3.44506	4.73623	3.99085	2.7961	9.52227	9.46547	13.1305	12.2121	1.32502	1.82163	1.53494	1.07542	5.5362	5.50318	7.63403	7.10008	2.17378	4.41738
PI(16_0_14_0)	781.487	A	0.0246484	0.0262582	0.027395	0.0246086	0.0724515	0.0661295	0.0858081	0.0847123	0.00948016	0.0100993	0.0105365	0.00946485	0.042123	0.0384474	0.0498884	0.0492513	2.17577	6.2515
TG(16_0_18_1_24_2)	963.835	A	0.105747	0.138753	0.121845	0.0933709	0.311974	0.311322	0.388694	0.374093	0.0406719	0.0533664	0.0468636	0.0359119	0.18138	0.181001	0.225985	0.217496	2.19676	5.19411
TG(18_1_14_0_17_1)	834.755	A	0.418717	0.58861	0.521077	0.389007	1.25047	1.26253	1.71046	1.60753	0.161045	0.226389	0.200414	0.149618	0.727017	0.734028	0.994456	0.934611	2.20639	4.72978
TG(19_1_18_1_18_1)	916.833	A	0.29539	0.40484	0.34831	0.250719	0.870499	0.836581	1.16068	1.0767	0.113611	0.155708	0.133965	0.0964303	0.506104	0.486384	0.674813	0.62599	2.20745	4.63052
TG(16_0e_15_0_16_0)	796.775	B	0.0248165	0.0378008	0.0315603	0.0219639	0.0745586	0.0796461	0.108751	0.0980528	0.0095448	0.0145388	0.0121386	0.00844764	0.0433481	0.0463059	0.0632276	0.0570075	2.24749	4.32946
FA 20_1	309.28	D	0.0627462	0.0657688	0.0674396	0.051792	0.213861	0.16947	0.213306	0.189575	0.0241331	0.0252957	0.0259383	0.01992	0.124338	0.0985292	0.124015	0.110218	2.26307	5.89173
TG(16_0_17_1_18_1)	862.786	A	0.826251	1.17114	1.03436	0.740191	2.5729	2.61642	3.503	3.38277	0.317789	0.45044	0.397832	0.284689	1.49587	1.52117	2.03663	1.96673	2.28373	4.67785
TG(18_1_18_1_24_1)	991.866	A	0.0679999	0.0955166	0.0821119	0.0565773	0.215779	0.218184	0.280406	0.255305	0.0261538	0.0367372	0.0315815	0.0217605	0.125453	0.126851	0.163027	0.148433	2.29697	4.73904
PE(18_1_14_0)	688.492	A	0.33031	0.346915	0.383471	0.394167	1.10002	1.30448	1.16343	1.26015	0.127042	0.133429	0.147489	0.151603	0.639549	0.75842	0.676412	0.732648	2.3272	6.90326
PE(14_0_18_2)	686.477	A	0.0838852	0.0870572	0.0943563	0.0864555	0.272265	0.275019	0.303659	0.328534	0.0322635	0.0334836	0.0362909	0.0332521	0.158293	0.159895	0.176546	0.191008	2.33868	7.18681
TG(16_0_16_1_18_1)	848.77	A	4.95778	7.39957	6.22639	4.31279	16.0167	16.6877	22.179	20.8447	1.90684	2.84599	2.39477	1.65877	9.31201	9.70214	12.8947	12.119	2.3388	4.52749
TG(16_0_18_1_19_0)	897.788	A	0.0704915	0.0828173	0.0788432	0.0602271	0.218591	0.22746	0.285468	0.265475	0.0271121	0.0318528	0.0303243	0.0231643	0.127088	0.132244	0.16597	0.154346	2.36777	5.62448
TG(16_0_18_1_18_1)	876.802	A	6.25641	8.80679	7.60606	5.23979	20.399	20.984	27.8999	26.3205	2.40631	3.38723	2.92541	2.0153	11.8599	12.2	16.2209	15.3026	2.38644	4.6867
TG(12_0e_16_0_17_0)	768.744	C	0.0178166	0.0189875	0.0206273	0.0144163	0.0573916	0.0559814	0.0722163	0.069091	0.00685255	0.00730287	0.00793358	0.00554472	0.0333672	0.0325473	0.0419862	0.0401692	2.42512	5.54714
TG(16_1_14_0_18_1)	820.739	A	1.77453	2.49207	2.16035	1.53725	5.999	6.26509	8.56968	7.82443	0.682512	0.958487	0.830904	0.591252	3.48779	3.6425	4.98237	4.54909	2.45182	4.77765
TG(14_0e_16_0_16_0)	782.76	B	0.0573664	0.103435	0.0785607	0.044095	0.205211	0.226653	0.29483	0.271233	0.022064	0.0397826	0.0302156	0.0169596	0.119309	0.131775	0.171413	0.157693	2.47096	3.8196
PG(18_0_18_1)	794.591	A	0.0132008	0.00430496	0.00318346	0.00746865	0.0216728	0.019472	0.0260586	0.0234317	0.00507725	0.00165575	0.00122441	0.00287256	0.0126005	0.011321	0.0151504	0.0136231	2.48991	2.77807
TG(19_1_18_1_20_1)	944.864	A	0.0760999	0.0999349	0.0849416	0.0639688	0.276074	0.251099	0.358722	0.330473	0.0292692	0.0384365	0.0326698	0.0246034	0.160508	0.145988	0.208559	0.192135	2.50503	5.07616
TG(18_1_18_1_23_1)	972.895	A	0.0272935	0.041696	0.0400541	0.0233238	0.108477	0.102497	0.140457	0.13734	0.0104975	0.0160369	0.0154054	0.00897071	0.0630679	0.0595912	0.0816608	0.0798491	2.51019	4.38123
TG(12_0e_16_0_16_1)	752.713	B	0.0119456	0.0193809	0.0149412	0.010912	0.0410614	0.0475698	0.069452	0.0567946	0.00459447	0.00745419	0.00574661	0.00419693	0.0238729	0.0276568	0.0403791	0.0330201	2.51442	4.2813
TG(17_0_18_1_18_1)	890.817	A	0.68699	0.948333	0.816272	0.581145	2.50899	2.45318	3.39018	3.1837	0.264227	0.364744	0.313951	0.223517	1.45871	1.42627	1.97103	1.85099	2.53308	4.91135
TG(26_1_18_1_18_1)	1014.94	A	0.0743341	0.109978	0.0918898	0.066093	0.29211	0.270553	0.385408	0.364202	0.02859	0.0422992	0.0353422	0.0254204	0.169831	0.157299	0.224074	0.211745	2.54703	4.79121
TG(16_1_14_4_18_1)	795.65	A	0.0249005	0.0410293	0.0330374	0.0240426	0.104701	0.105591	0.146148	0.130216	0.0095771	0.0157805	0.0127067	0.00924717	0.0608724	0.0613898	0.0849696	0.0757071	2.60067	4.68913
TG(18_0_18_1_20_1)	937.819	A	0.150642	0.208744	0.175993	0.135158	0.581929	0.605412	0.764596	0.744479	0.0579392	0.0802863	0.0676898	0.0519839	0.338331	0.351984	0.444533	0.432837	2.61277	5.32233
TG(16_1_12_0_18_1)	797.663	A	0.137754	0.20168	0.169399	0.122639	0.530605	0.590439	0.755203	0.712794	0.0529825	0.0775691	0.0651534	0.0471687	0.308491	0.343278	0.439072	0.414415	2.6438	4.95875
TG(16_0_12_0_20_5)	797.665	A	0.137754	0.200275	0.169399	0.122639	0.528379	0.590439	0.754292	0.712274	0.0529825	0.0770289	0.0651534	0.0471687	0.307197	0.343278	0.438542	0.414113	2.6441	4.97364
DG(16_0e_16_1)	575.501	C	0.0322932	0.0521914	0.0390514	0.0285946	0.108051	0.119214	0.231055	0.190972	0.0124205	0.0200736	0.0150198	0.0109979	0.0628202	0.0693102	0.134335	0.11103	2.65571	3.74431
TG(26_1_18_1_20_1)	1042.97	A	0.0127435	0.0182949	0.0177117	0.0116356	0.0571071	0.0511039	0.0748128	0.0664603	0.00490135	0.00703649	0.00681221	0.00447523	0.0332018	0.0297116	0.0434958	0.0386397	2.65571	4.88898
TG(16_0_14_2_16_1)	790.692	A	0.0801401	0.101667	0.086258	0.0639348	0.287588	0.291554	0.422386	0.390047	0.0308231	0.0391026	0.0331762	0.0245903	0.167203	0.169508	0.245573	0.226771	2.66213	4.96531
TG(16_0_16_0_18_1)	850.786	A	4.80706	6.9621	5.89058	4.02562	19.0283	20.0413	25.8372	24.7816	1.84887	2.67773	2.26561	1.54831	11.063	11.6519	15.0216	14.4079	2.66242	4.90331
TG(16_0_14_1_16_0)	799.679	A	0.304077	0.432961	0.363243	0.265584	1.20254	1.38867	1.59581	1.47501	0.116953	0.166524	0.139709	0.102148	0.699152	0.807368	0.927795	0.857566	2.66454	5.28117
TG(15_0_20_4_24_1)	951.837	A	0.0208018	0.0248545	0.0211292	0.0158808	0.0766041	0.082009	0.098855	0.0930257	0.00800071	0.00955943	0.00812662	0.006108	0.0445373	0.0476796	0.0574738	0.0540847	2.69095	5.58264
TG(20_1_18_1_18_1)	930.848	A	0.974305	1.34717	1.16593	0.819085	4.04534	3.84872	5.41336	5.04994	0.374733	0.518143	0.448434	0.315033	2.35194	2.23763	3.1473	2.93601	2.69797	5.03029
PI(18_0_20_1)	891.597	A	0.0644446	0.0801939	0.0762366	0.0798099	0.308141	0.307381	0.335873	0.342692	0.0247864	0.0308438	0.0293218	0.0306961	0.179152	0.17871	0.195275	0.19924	2.70549	7.20498
TG(25_1_16_0_18_1)	974.911	A	0.0351603	0.0533977	0.0418703	0.0326947	0.15356	0.151026	0.208793	0.189872	0.0135232	0.0205376	0.016104	0.0125749	0.0892789	0.0878057	0.121391	0.110391	2.71678	5.06881
TG(16_0_17_0_18_1)	864.802	A	0.7239	1.05538	0.881943	0.620936	3.08181	3.09634	4.30059	4.04212	0.278423	0.405914	0.339209	0.238822	1.79175	1.8002	2.50034	2.35007	2.75388	4.92637
TG(15_0_16_0_18_1)	836.77	A	0.699155	1.01226	0.878331	0.611431	3.0544	3.09427	4.24156	4.02386	0.268906	0.389329	0.33782	0.235166	1.77582	1.799	2.46602	2.33946	2.77843	5.00157
TG(18_1_14_2_18_3)	840.708	B	0.00604742	0.00712002	0.0055653	0.00474747	0.0215802	0.0227056	0.0323217	0.031136	0.00232593	0.00273847	0.0021405	0.00182595	0.0125467	0.0132009	0.0187917	0.0181023	2.78604	5.14599
TG(16_1_18_1_24_1)	958.88	A	0.286359	0.406175	0.346851	0.247677	1.29997	1.21094	1.7767	1.65169	0.110138	0.156221	0.133404	0.0952602	0.755797	0.704038	1.03297	0.960282	2.8093	5.02444
TG(16_0_18_1_20_1)	904.833	A	2.08937	2.98245	2.47961	1.71249	9.29777	9.00867	12.5753	11.9415	0.803603	1.1471	0.953695	0.658649	5.40568	5.2376	7.31125	6.94276	2.81932	4.96865
TG(16_0_16_0_20_1)	878.817	A	2.152	3.18157	2.55282	1.78552	9.61039	9.7312	13.32	12.5088	0.827694	1.22368	0.981855	0.686739	5.58744	5.65767	7.7442	7.27253	2.83704	4.92886
TG(16_0_19_0_20_1)	925.819	A	0.013331	0.0233189	0.0202526	0.0152928	0.0746089	0.0733554	0.0987955	0.0890495	0.00512732	0.0089688	0.00778948	0.00588185	0.0433773	0.0426485	0.0574392	0.0517729	2.83762	4.97516
TG(16_0_14_0_18_1)	822.755	A	2.97796	4.50659	3.76733	2.59707	13.7246	14.5272	19.302	18.1093	1.14537	1.7333	1.44897	0.998875	7.97943	8.44602	11.2221	10.5286	2.85908	4.97103
PS(18_1_14_0)	756.479	B	0.00377024	0.00521684	0.00478125	0.00464907	0.0226629	0.0147423	0.0268213	0.0264526	0.00145009	0.00200648	0.00183894	0.00178811	0.0131761	0.00857108	0.0155938	0.0153794	2.86676	4.84623
TG(14_0e_14_0_16_0)	754.728	B	0.0132733	0.0269324	0.0191275	0.0137484	0.072779	0.0749693	0.102098	0.0952142	0.0051051	0.0103586	0.00735675	0.00528786	0.0423134	0.0435868	0.0593595	0.0553571	2.88113	4.41522
TG(16_1_14_0_16_1)	792.708	A	0.380951	0.56032	0.463978	0.328785	1.74625	1.82757	2.53668	2.3887	0.14652	0.215508	0.178453	0.126456	1.01526	1.06254	1.47482	1.38878	2.89961	4.98205
TG(17_0_18_1_20_1)	918.848	A	0.166997	0.224852	0.202503	0.143429	0.797521	0.763577	1.10351	1.03726	0.0642295	0.0864816	0.0778857	0.0551649	0.463675	0.44394	0.641575	0.603059	2.92609	5.23856
TG(16_0e_18_2_22_5)	908.807	B	0.00597432	0.00303342	0.00338184	0.00527303	0.0277796	0.0311594	0.038776	0.00633486	0.00229782	0.0011667	0.00130071	0.00202809	0.0161509	0.0181159	0.0225442	0.00368306	2.93655	2.42243
TG(16_0_18_1_23_1)	946.88	A	0.0510494	0.0721093	0.0650785	0.0434747	0.252751	0.254618	0.334236	0.323248	0.0196344	0.0277344	0.0250302	0.016721	0.146948	0.148034	0.194323	0.187935	2.94181	5.23297
DG(14_0e_16_0)	549.485	C	0.0546983	0.081208	0.091182	0.0507121	0.350676	0.224824	0.459413	0.395269	0.0210378	0.0312339	0.03507	0.0195047	0.203881	0.130712	0.267101	0.229808	2.95737	4.16459
TG(18_0_17_0_18_1)	892.833	A	0.230201	0.319119	0.273859	0.194371	1.13232	1.10797	1.53926	1.48571	0.0885389	0.122738	0.10533	0.0747581	0.658326	0.644169	0.894921	0.863786	2.97587	5.24547
TG(16_0_16_0_17_0)	838.786	A	0.252736	0.363939	0.302454	0.204377	1.25377	1.30834	1.70057	1.66858	0.097206	0.139977	0.116329	0.0786067	0.728937	0.760665	0.988705	0.970105	3.01538	5.12287
DG(16_2e_16_0)	551.503	C	0.0594617	0.12198	0.106478	0.0501379	0.355809	0.360034	0.528728	0.484645	0.0228699	0.0469154	0.0409532	0.0192838	0.206865	0.209322	0.3074	0.28177	3.02797	3.91088
TG(18_0_18_1_22_1)	960.895	A	0.245849	0.382432	0.308173	0.211846	1.36046	1.29374	1.86278	1.7602	0.0945572	0.147089	0.118528	0.0814792	0.790962	0.752172	1.08301	1.02337	3.06531	4.97482
TG(16_0_16_0_23_1)	920.864	A	0.0459907	0.0665202	0.0544603	0.0406473	0.255789	0.251912	0.351463	0.328415	0.0176887	0.0255847	0.0209463	0.0156336	0.148714	0.146461	0.204339	0.190939	3.12135	5.39297
TG(18_0_16_0_20_1)	906.848	A	0.428959	0.611063	0.498857	0.361764	2.36094	2.29069	3.25705	3.0856	0.164984	0.235024	0.191868	0.13914	1.37264	1.33179	1.89363	1.79395	3.13764	5.28428
OAHFA(18_1_18_0)	563.504	C	0.00237769	0.00203393	0.00194794	0.000904992	0.0141993	0.00622249	0.0124034	0.00927869	0.000914497	0.00078228	0.000749207	0.000348074	0.00825541	0.00361773	0.00721128	0.00539458	3.15112	3.6059
TG(16_0_18_1_22_1)	932.864	A	0.44472	0.658406	0.527111	0.378408	2.62543	2.47831	3.61159	3.38057	0.171046	0.253233	0.202735	0.145541	1.52641	1.44088	2.09976	1.96545	3.1985	5.21206
TG(16_0_14_0_16_1)	794.723	A	0.901391	1.34555	1.11398	0.768204	5.19205	5.40044	7.56199	6.94739	0.346689	0.517521	0.428452	0.295463	3.01863	3.13979	4.3965	4.03918	3.21383	5.17364
TG(15_0_16_0_16_0)	810.755	A	0.191401	0.291307	0.241618	0.177619	1.19437	1.23793	1.63219	1.56625	0.0736157	0.112041	0.0929299	0.068315	0.694401	0.719729	0.94895	0.910609	3.25245	5.47168
TG(16_1_10_1_18_1)	762.661	A	0.014805	0.0249155	0.0197211	0.0153749	0.097748	0.106216	0.153631	0.138747	0.00569421	0.00958287	0.00758503	0.00591344	0.0568302	0.0617537	0.0893205	0.0806666	3.33369	5.13271
TG(16_0_14_0_16_0)	796.739	A	0.522106	0.818756	0.683601	0.464107	3.97775	4.15143	5.63089	5.2896	0.20081	0.314906	0.262923	0.178503	2.31265	2.41362	3.27377	3.07535	3.55221	5.40358
TG(16_0_14_4_16_0)	771.65	A	0.0719735	0.107818	0.0884666	0.0599112	0.521624	0.576805	0.745954	0.687587	0.0276821	0.0414686	0.0340256	0.0230428	0.30327	0.335352	0.433694	0.39976	3.56447	5.4797
TG(16_1_9_0_18_1)	750.661	A	0.00924419	0.0142284	0.0103465	0.00888814	0.0695577	0.0764688	0.109029	0.097793	0.00355546	0.00547247	0.00397941	0.00341851	0.0404405	0.0444586	0.0633888	0.0568564	3.64484	5.56326
TG(16_1_12_0_16_1)	764.676	A	0.0903559	0.128227	0.104142	0.0772391	0.659378	0.707558	1.0157	0.928446	0.0347523	0.049318	0.0400548	0.0297074	0.38336	0.411371	0.590524	0.539794	3.64731	5.55696
TG(16_0_13_0_14_0)	759.647	A	0.00859301	0.0112319	0.0104558	0.00771036	0.0649553	0.0755487	0.0889126	0.0881289	0.003305	0.00431995	0.00402145	0.00296552	0.0377647	0.0439236	0.0516934	0.0512377	3.66382	6.2666
TG(16_1_12_4_18_1)	767.618	A	0.00508796	0.00885498	0.00603377	0.00371715	0.0398171	0.0402874	0.0568252	0.0548943	0.00195691	0.00340576	0.00232068	0.00142967	0.0231495	0.0234229	0.0330379	0.0319153	3.66455	4.77442
TG(18_1_12_0_14_0)	766.692	A	0.221675	0.328693	0.273832	0.179433	1.71991	1.79324	2.48293	2.3602	0.0852596	0.12642	0.10532	0.0690125	0.999947	1.04258	1.44356	1.37221	3.67152	5.39144
TG(16_0e_10_0_16_0)	726.697	B	0.00566425	0.00492359	0.00519511	0.00231106	0.0314859	0.0313593	0.0433037	0.0406488	0.00217856	0.00189369	0.00199812	0.000888868	0.0183058	0.0182321	0.0251766	0.023633	3.68153	4.56414
PI(16_0_22_1)	910.638	C	0.0554924	0.135494	0.0481983	0.0793063	0.591638	0.592571	0.692574	0.681842	0.0213432	0.0521129	0.0185378	0.0305024	0.343976	0.344518	0.402659	0.39642	3.71909	4.47406
TG(16_0_9_0_18_1)	757.632	A	0.00928599	0.0137886	0.00994024	0.00741041	0.0782413	0.0806398	0.112549	0.0990665	0.00357153	0.00530329	0.00382317	0.00285016	0.0454892	0.0468836	0.0654353	0.0575968	3.81228	5.58835
DG(16_2e_14_0)	523.472	C	0.155898	0.271181	0.228892	0.130459	1.72084	1.17741	2.44423	2.26083	0.0599607	0.1043	0.0880355	0.0501765	1.00049	0.684544	1.42106	1.31444	3.87474	4.55958
TG(16_0_14_0_14_0)	768.708	A	0.155197	0.240223	0.195062	0.134093	1.47527	1.54307	2.20558	2.04931	0.0596912	0.0923933	0.0750238	0.0515742	0.857717	0.897133	1.28232	1.19146	3.93739	5.53973
TG(15_0_12_0_14_0)	726.661	A	0.00839402	0.0113588	0.00868605	0.00772344	0.0908747	0.0964504	0.136884	0.127351	0.00322847	0.00436876	0.00334079	0.00297055	0.0528341	0.0560758	0.0795837	0.0740416	4.23209	6.28384
DG(16_2e_12_0)	495.441	C	0.0303205	0.0496309	0.0298137	0.0202775	0.352049	0.290155	0.496546	0.474113	0.0116617	0.0190888	0.0114668	0.00779903	0.204679	0.168695	0.28869	0.275647	4.26862	4.94382
TG(10_0_14_0_18_1)	743.616	A	0.0193162	0.0286107	0.0234974	0.01762	0.222979	0.262073	0.349711	0.315163	0.0074293	0.0110041	0.00903745	0.00677692	0.129639	0.152368	0.20332	0.183234	4.2913	6.02764
TG(16_0_9_0_16_1)	724.645	A	0.00810656	0.0104871	0.00750928	0.00705364	0.0899044	0.0935826	0.146718	0.126094	0.00311791	0.00403351	0.00288818	0.00271294	0.05227	0.0544085	0.0853011	0.0733103	4.36537	6.0716
TG(14_0_14_0_14_1)	738.661	A	0.0542832	0.0881461	0.0676277	0.0457839	0.670305	0.725778	1.07736	0.996045	0.0208781	0.0339023	0.0260107	0.0176092	0.389712	0.421964	0.626373	0.579096	4.37231	5.50424
TG(16_0_12_0_14_0)	745.632	A	0.0126361	0.0197355	0.0148509	0.0110107	0.161122	0.179154	0.235204	0.218123	0.00486002	0.00759058	0.00571189	0.0042349	0.0936756	0.10416	0.136747	0.126816	4.38318	5.98036
TG(16_1_8_0_18_1)	736.645	A	0.0187553	0.0302985	0.023611	0.0162181	0.239297	0.258797	0.393724	0.343365	0.00721358	0.0116533	0.00908116	0.00623774	0.139126	0.150464	0.228909	0.199631	4.40402	5.56898
TG(18_4_10_0_16_1)	741.603	A	0.007302	0.00908807	0.00946564	0.00450758	0.0819649	0.09466	0.139332	0.118339	0.00280846	0.00349541	0.00364063	0.00173369	0.047654	0.0550349	0.0810068	0.0688015	4.46197	5.24847
TG(16_0_8_0_12_0)	656.582	A	0.000788354	0.00328113	0	0.0027243	0.0218939	0.0256841	0.0364141	0.0337796	0.000303213	0.00126197	0	0.00104781	0.012729	0.0149326	0.021171	0.0196393	4.50705	3.25898
TG(18_1_10_1_13_0)	722.629	C	0.00257879	0.00497548	0.00421644	0.00120104	0.0374307	0.0386547	0.0566747	0.0506892	0.000991842	0.00191365	0.00162171	0.000461938	0.0217621	0.0224736	0.0329504	0.0294705	4.58738	4.10998
LPC(20_4)	544.34	B	0.000813887	0.000973943	0.000767829	0.000774542	0.0170145	0.00722583	0.016201	0.0206093	0.000313034	0.000374593	0.000295319	0.000297901	0.00989218	0.00420106	0.00941919	0.0119821	4.6986	5.01972
TG(16_0_10_0_14_0)	712.645	A	0.00883652	0.0177408	0.0131807	0.00882505	0.208088	0.233306	0.34239	0.313376	0.00339866	0.00682338	0.00506951	0.00339425	0.120981	0.135643	0.199064	0.182195	5.12709	5.60423
TG(16_0_8_0_16_0)	717.6	A	0.0035751	0.00540567	0.00377675	0.00178209	0.0690525	0.0790565	0.109226	0.0967158	0.00137504	0.0020791	0.0014526	0.00068542	0.0401468	0.0459631	0.0635034	0.0562301	5.28563	5.1626
TG(8_0_14_0_18_1)	710.629	A	0.0097957	0.016774	0.0114974	0.00796531	0.246855	0.26943	0.409281	0.360929	0.00376758	0.00645154	0.00442208	0.00306358	0.14352	0.156645	0.237954	0.209843	5.42524	5.86668
TG(16_0_8_0_14_0)	684.614	A	0.00288381	0.00328764	0.00379983	0.00288878	0.073643	0.0800622	0.120985	0.11042	0.00110916	0.00126448	0.00146147	0.00111107	0.0428157	0.0465478	0.07034	0.0641979	5.47852	6.82921
TG(16_1_8_0_16_1)	708.614	A	0.00311562	0.00421402	0.00292085	0.00207322	0.0734296	0.072861	0.120685	0.103579	0.00119831	0.00162078	0.0011234	0.000797392	0.0426916	0.042361	0.070166	0.0602201	5.51662	5.973
