# Supplementary material for: A Two-Dimensional Peptide-Centric Stability Assay Maps Multidimensional Target Landscapes Unveiling 17β-Estradiol (E2)-GPX4 Binding-Induced Ferroptosis
Source: Research Square preprint supplement (doi:10.21203/rs.3.rs-6893001/v1), 2025-07-04
Supplement: Supplementary file 2 [file 1e76fdfcab4549b47897fe3f.xlsx]

## Sheet: parameter description
Supplementary table 4
This file summarizes peptide-level Bayes t-test and the parameters of the dose-response curves fitted by the peptides quantified in 2D-PELSA 17β-Estradiol (E2) analysis
Tab descriptions
A	Bayes t-test result	Summary of peptide-level bayes t-test resullt to increasing E2 concentrations as measured by 2D-PELSA in BT474 cell lysates
B	dose-response curves	Summary of peptide-level binding affinities to E2 as measured by 2D-PELSA in BT474 cell lysates
Column descriptions
	Sequence	Amino acid sequence of the detected peptide
	Sequence start position	The N-terminal position of the peptide on the protein sequence
	Gene names	Gene names of the corresponding protein
	Protein names	Common names of the corresponding protein
	Uniprot entry	Uniprot entry of the corresponding protein
	Log2FC	Log2 intensity fold change of the proxy peptide that was used to represent its parent protein (moderated empirical Bayes t-test)
	-Log10P.Value	-Log10 P.Value of the proxy peptide that was used to represent its parent protein (moderated empirical Bayes t-test)
	Ratio_ E2 treatment vs Vehicle	Relative averaged peptide intensity under ligand treatment to that under vehicle treatment
	EC50 (mM)	The EC50 values calculated by fitting peptide's Ratio_E2 vs Vehicle and ligand concentrations to a four-parameter log-logistic model.
	R2	The pearson correlation to a sigmoid trend of the ligand dose-response profile
	Lower	The bottom plateaus of the dose-response curve
	Upper	The top plateaus of the dose-response curve

## Sheet: A Bayes T-test
Gene names	Protein names	Uniprot entry	Sequence	Sequence start position	E2_010 nM		E2_100 nM		E2_001 mM		E2_010 mM		E2_100 mM
					Log2FC	-Log10P.Value	Log2FC	-Log10P.Value	Log2FC	-Log10P.Value	Log2FC	-Log10P.Value	Log2FC	-Log10P.Value
GPATCH1	G patch domain-containing protein 1	Q9BRR8	AGDLGEIGLNK	265	1.50587	5.21815	0.429212	0.262835	1.01676	1.96295	0.72107	0.538207	1.16187	2.27558
USP48	Ubiquitin carboxyl-terminal hydrolase 48	Q86UV5	TVNNLLK	577	-4.69934	5.0058	-0.480343	0.972139	-0.760416	0.486294	-0.376708	0.794792	-1.57433	1.13666
RPL38	Large ribosomal subunit protein eL38	P63173	LKQSLPPGLAVK	56	-1.39795	4.8832	-0.566897	0.533494	-1.42562	2.34307	-0.885481	0.777342	-0.680382	0.770767
HAUS6	HAUS augmin-like complex subunit 6	Q7Z4H7	NTESSAFGGSLPAK	515	-2.01357	4.82198	-0.889674	0.797015	0.462557	0.655475	0.417479	0.460675	0.06393	0.0537914
PMS1	PMS1 protein homolog 1	P54277	IDVPTADVDVNLTPDKSQVLLQNK	299	2.80984	4.47372	0.857	0.834849	-0.45764	0.48145	-0.356913	0.198698	-0.566734	0.725934
TRMT2A	tRNA (uracil-5-)-methyltransferase homolog A	Q8IZ69	STPYSAYDPETYTGHWK	298	-2.40649	4.27665	-1.54369	1.12698	-1.64865	1.18774	-0.816805	0.440372	-1.25369	0.930102
ACAD9	Complex I assembly factor ACAD9, mitochondrial	Q9H845	YAPENLDEQIK	589	-2.98743	4.21136	-0.794671	0.620436	-1.65853	1.59448	-1.86329	1.81856	-0.446837	0.136462
GAS2L1	GAS2-like protein 1	Q99501	LTTGTPASPR	387	-2.26263	4.12218	-0.229989	0.176581	-1.25182	0.777575	-1.2033	0.809768	-0.220945	0.152653
RDX	Radixin	P35241	KAPDFVFYAPRLR	263	-6.10997	4.01116	-1.02307	0.316734	-2.31492	0.984046	0.26815	0.21619	-2.83484	0.969287
MED13	Mediator of RNA polymerase II transcription subunit 13	Q9UHV7	DLTAIYESCR	1391	-3.01755	3.93738	-0.320451	0.416679	-0.703143	0.458557	-0.610829	0.508517	-1.57217	1.86834
URGCP	Up-regulator of cell proliferation	Q8TCY9	QLLDPPGDLSR	837	0.538253	3.93261	0.104604	0.467121	0.121421	0.386222	0.23998	1.06261	0.116721	0.40212
UBR4	E3 ubiquitin-protein ligase UBR4	Q5T4S7	AVEMTDQLMVPTLGSQEGAFENVR	1851	-2.22284	3.88542	-0.22841	0.690611	-0.0140187	0.0280014	-0.220668	0.723885	-0.457323	0.971845
AFG2A	ATPase family gene 2 protein homolog A	Q8NB90	QIFAEATLR	437	-1.4992	3.86018	-1.61879	0.71296	0.0207341	0.0400314	-0.0176288	0.0190505	-1.75408	0.75365
TYK2	Non-receptor tyrosine-protein kinase TYK2	P29597	EITQLSHLGQGTR	588	-2.40967	3.80116	-1.46749	1.96414	-0.165518	0.148381	-0.87773	1.54021	-0.748074	0.744436
PARD3	Partitioning defective 3 homolog	Q8TEW0	EGHMMDALYAQVK	1119	-1.67328	3.75786	-0.295835	0.195825	0.175428	0.107031	0.440856	0.934927	-0.464799	0.452813
KDM1A	Lysine-specific histone demethylase 1A	O60341	GIFGSSAVPQPK	733	3.80282	3.71853	1.79522	0.9296	2.73215	1.32977	3.05982	2.61985	3.26756	3.20492
ASCC3	Activating signal cointegrator 1 complex subunit 3	Q8N3C0	SVGDVALSQIVR	595	-0.834657	3.69253	-0.258431	0.798762	-0.686366	1.43826	-0.505201	1.32597	-0.942279	2.51512
TRMT10C	tRNA methyltransferase 10 homolog C	Q7L0Y3	NLTLDQMIR	350	-0.359666	3.66759	-0.0354868	0.254844	0.0289144	0.197157	0.132811	1.16924	0.0522265	0.24368
UBE3C	Ubiquitin-protein ligase E3C	Q15386	ILLENVLKPLHFTYNSCPEGAR	236	1.34532	3.65657	-0.0779161	0.0778004	-0.00729642	0.00611347	0.420939	0.582445	0.152462	0.12385
S100A13	Protein S100-A13	Q99584	LIGELAKEIR	79	3.73621	3.63027	1.86594	0.883817	1.55923	1.5253	0.279869	0.224499	2.08807	1.46425
GOLPH3	Golgi phosphoprotein 3	Q9H4A6	LTLMEEVLLLGLK	60	1.74934	3.60075	0.653592	0.877695	1.05553	1.57685	0.451194	0.528554	1.22777	1.57703
CLMN	Calmin	Q96JQ2	HDEESHSLSPPGENTVMADSFQIK	518	-1.27695	3.5803	-0.493579	0.943407	-0.68555	0.89632	-0.201228	0.505545	-0.170458	0.248912
MARS1	Methionine--tRNA ligase, cytoplasmic	P56192	NVLITSALPYVNNVPHLGNIIGCVLSADVFAR	265	-1.49897	3.54953	-0.393024	0.403625	0.345636	0.262141	-0.239489	0.368557	-2.23907	0.721595
NASP	Nuclear autoantigenic sperm protein	P49321	SLQENEEEEIGNLELAWDMLDLAK	503	-1.40592	3.53258	-0.941364	1.05083	-1.66832	2.32236	-1.26358	0.706995	-0.857162	0.667456
ATP5ME	ATP synthase subunit e, mitochondrial	P56385	YNYLKPR	30	-0.911921	3.4801	-0.275932	1.26695	-0.00928944	0.0253621	-0.0585631	0.194562	0.0625929	0.196938
PHF20	PHD finger protein 20	Q9BVI0	IVATHQLLGDVQR	739	1.59616	3.47855	0.952583	1.84687	0.0407914	0.0230442	0.176963	0.168533	-0.241957	0.167607
DNM1L	Dynamin-1-like protein	O00429	SVTDSIRDEYAFLQKK	257	-1.43301	3.45554	-0.476542	0.690937	-0.754777	1.37766	-0.330878	0.737126	-0.200439	0.251204
IQGAP2	Ras GTPase-activating-like protein IQGAP2	Q13576	IVGNLLYYR	1099	-0.904376	3.44975	-0.83301	0.700155	-0.440931	1.26863	-0.372418	1.57049	-0.158752	0.675305
ARFIP1	Arfaptin-1	P53367	SGPVILADEIKNPAMEK	108	-0.607092	3.44261	-0.430563	1.13549	-0.369173	0.928506	-0.165065	0.540842	-0.0198868	0.0565138
RIC8B	Synembryn-B	Q9NVN3	EGLTPVLSLLTECSR	361	1.45557	3.43558	0.282094	0.232957	-0.00190173	0.00134839	0.222021	0.225749	1.41808	1.8297
CORO1A	Coronin-1A	P31146	SDLFQEDLYPPTAGPDPALTAEEWLGGR	356	2.28892	3.43366	1.58937	1.91104	2.05184	2.63404	0.892625	1.0649	0.96059	1.28325
GLYR1	Cytokine-like nuclear factor N-PAC	Q49A26	CQNILQGNFKPDFYLK	486	1.76117	3.42624	0.480515	0.601813	0.562476	0.543734	0.763304	0.905899	0.208309	0.184568
RGL3	Ral guanine nucleotide dissociation stimulator-like 3	Q3MIN7	CQSYTLSPHPPILAALHAQNQLTEEQSYR	469	1.52397	3.42392	2.33922	1.38796	2.94544	2.50295	1.7694	1.92364	1.61108	2.91983
PRR14L	Protein PRR14L	Q5THK1	ECEELKSCPWLSLPGNSAISNVDNGK	271	1.74101	3.42041	0.102824	0.0680112	0.726811	0.554287	-0.432529	0.590923	-0.60365	0.794879
XRN2	5'-3' exoribonuclease 2	Q9H0D6	KYPLPPPSGR	937	-1.50647	3.38592	-1.76429	2.21266	-1.4989	2.08535	-0.351452	0.869766	-0.581717	1.1292
NAP1L4	Nucleosome assembly protein 1-like 4	Q99733	GIPEFWFTIFR	158	2.90133	3.3781	1.03002	0.591863	1.57812	1.43962	-0.0427641	0.0311682	1.77305	1.54179
KIF16B	Kinesin-like protein KIF16B	Q96L93	SHLVPLMDAR	1108	-0.300004	3.35413	0.0299255	0.205963	-0.454424	1.19411	-0.546245	1.19202	-0.347906	0.728638
DSP	Desmoplakin	P15924	IGLVRPGTALELLEAQAATGFIVDPVSNLR	2280	-2.62176	3.31664	0.772793	0.746839	1.17009	1.32429	0.989446	1.01935	0.180322	0.103214
TLN1	Talin-1	Q9Y490	AVTQALNR	1191	3.78679	3.29873	2.69125	1.5392	0.731071	0.340489	2.71977	1.83927	1.72226	0.893119
SOS2	Son of sevenless homolog 2	Q07890	LCMAQPR	59	-2.11869	3.29435	-0.111998	0.0832184	-0.316527	0.203679	-0.674152	0.677322	-0.363696	0.258173
LAGE3	EKC/KEOPS complex subunit LAGE3	Q14657	MRPHIFTLSVPFPTPLEAEIAHGSLAPDAEPHQR	58	5.65266	3.27733	5.81562	3.31767	4.56993	1.86152	4.80657	1.92278	4.06998	1.68893
VPS13B	Intermembrane lipid transfer protein VPS13B	Q7Z7G8	AGWVVGSLDILGSPASLVR	3647	0.960867	3.2613	0.165833	0.253683	0.183186	0.420899	-0.245588	0.155342	0.133714	0.333561
UNC45A	Protein unc-45 homolog A	Q9H3U1	EIASTLMESEMMEILSVLAKGDHSPVTR	895	-1.48345	3.23724	-0.675179	0.54269	-0.196276	0.154399	-0.656998	1.0906	-0.609135	0.697755
GCN1	Stalled ribosome sensor GCN1	Q92616	LAHGLLEELK	600	0.324466	3.23284	0.0442802	0.081613	-0.27926	0.578579	-0.155843	0.49838	-0.250773	0.274918
NOTCH3	Neurogenic locus notch homolog protein 3	Q9UM47	QPPGGCVLSLGLLNPVAVPLDWAR	2151	2.76738	3.22927	0.455035	0.246439	0.0333706	0.0167222	1.81786	0.508817	0.914573	0.586469
WBP4	WW domain-binding protein 4	O75554	AYQEDLKR	75	0.858319	3.22234	0.388647	1.36448	0.149145	0.260698	0.407107	1.08675	-0.398153	0.290008
SCAMP3	Secretory carrier-associated membrane protein 3	O14828	EPPPAYEPPAPAPLPPPSAPSLQPSR	48	-1.76106	3.19337	0.0479073	0.0603211	0.299458	0.547987	-0.909311	1.26933	-0.544408	0.868474
SMARCA4	Transcription activator BRG1	P51532	RLMAEDEEGYRK	529	-2.28822	3.18998	0.27204	0.604839	0.729228	1.82454	0.587401	1.15145	0.296158	0.699461
FHOD1	FH1/FH2 domain-containing protein 1	Q9Y613	EMLEGFYEEISK	93	-2.67679	3.18937	-0.439004	0.344	0.19113	0.249259	0.146914	0.232753	-0.573739	0.293547
RAI14	Ankycorbin	Q9P0K7	RAELVCLNNTEISENSSDLSQK	463	-0.54408	3.16548	-0.153818	1.05041	-0.362309	0.846734	-0.429156	2.23572	-0.278371	1.59024
PRRC2A	Protein PRRC2A	P48634	FPLEEPGPRPLPWPPGSDEVAK	854	-0.720701	3.15101	-0.734776	4.73885	-1.39184	2.23453	-1.68579	3.02384	-1.09585	2.67277
TRPT1	tRNA 2'-phosphotransferase 1	Q86TN4	LGLPMGADGFVPLGTLLQLPQFR	46	-3.42782	3.13735	-0.649685	0.756923	-0.0524356	0.0417032	0.00141098	0.00145157	-0.750687	0.905824
HELLS	Lymphoid-specific helicase	Q9NRZ9	TVQCIATIALMIQR	255	-0.970449	3.10449	-0.467831	1.20941	-0.317324	0.815653	-0.0102113	0.0171296	-0.533685	1.41417
SMCHD1	Structural maintenance of chromosomes flexible hinge domain-containing protein 1	A6NHR9	EKDQLSQSIVMYK	1629	-0.595	3.07945	-0.19595	0.952347	-0.320593	1.24471	-0.12161	0.686446	-0.0954335	0.362276
LUC7L	Putative RNA-binding protein Luc7-like 1	Q9NQ29	VCEVCSAYLGLHDNDR	189	-0.348084	3.06146	-0.157752	0.859507	-0.0306617	0.150929	-0.212126	0.935903	-0.11427	0.914413
MACF1	Microtubule-actin cross-linking factor 1, isoforms 1/2/3/4/5	Q9UPN3	ELESFLR	797	-0.620747	3.05008	-0.244951	1.43626	-0.171651	0.528286	-0.215907	0.66405	-0.111493	0.471237
PFKL	ATP-dependent 6-phosphofructokinase, liver type	P17858	QANWLSVSNIIQLGGTIIGSAR	67	2.19259	3.04423	0.498747	0.31957	0.541991	0.282711	-0.117893	0.0606377	0.73311	0.698516
MANF	Mesencephalic astrocyte-derived neurotrophic factor	P55145	KILDDWGETCKGCAEK	142	1.66459	3.03814	0.347134	0.343232	-0.144411	0.103249	0.250018	0.180463	1.2212	1.33988
SON	Protein SON	P18583	EFPVSSGSQHR	2174	-0.28666	3.0358	-0.214718	1.4618	-0.135	1.27508	-0.173736	1.46225	-0.187655	1.34285
CHFR	E3 ubiquitin-protein ligase CHFR	Q96EP1	GCDLSFPSNK	45	-1.10299	3.02776	-0.272199	0.595278	-0.954632	0.999148	-0.913187	2.62914	-0.00953306	0.0124156
TEX2	Testis-expressed protein 2	Q8IWB9	IFWDFLGEK	831	2.76102	3.02167	-0.00119701	0.000251184	0.470634	0.246596	0.397525	0.121825	1.52545	1.07339
LIG1	DNA ligase 1	P18858	DIEQIAEFLEQSVK	703	-2.63033	3.01209	-1.78378	0.88306	-0.726169	1.45936	-0.212141	0.164884	-1.38394	0.99711
MARK2	Serine/threonine-protein kinase MARK2	Q7KZI7	FLILNPSKR	284	1.53316	3.01119	0.275793	0.204655	-0.386102	0.472531	0.474994	0.54491	0.871212	0.949131
DNAJC9	DnaJ homolog subfamily C member 9	Q8WXX5	ISLEDIQAFEK	108	-0.415187	2.99021	-0.0665633	0.123263	-0.326544	0.773682	-0.175894	0.479508	0.139434	0.903022
VPS50	Syndetin	Q96JG6	TRLDELR	455	4.76014	2.98308	0.319272	0.0698666	1.74671	0.460225	2.86211	1.11855	3.11197	1.12129
CREBBP	CREB-binding protein	Q92793	TVEVKPGMK	1368	1.86917	2.97398	0.245039	0.0912761	0.939986	0.846885	0.929524	0.611085	-0.600515	0.408211
INF2	Inverted formin-2	Q27J81	NEFIGLQLLDVLAR	219	1.89103	2.96659	0.224644	0.168563	-0.132683	0.0743978	-0.248995	0.189056	1.18269	1.23444
PHF6	PHD finger protein 6	Q8IWS0	CGFCHVGEEENEAR	212	0.758634	2.96211	0.35407	0.82185	0.183723	0.590031	0.381458	0.746575	0.151132	0.381001
IGFBP2	Insulin-like growth factor-binding protein 2	P18065	LEGEACGVYTPR	93	-0.820068	2.95991	-0.185279	0.481573	0.0375709	0.142632	-0.855824	0.65312	0.0692892	0.198638
PLEKHG4B	Pleckstrin homology domain-containing family G member 4B	Q96PX9	TEEMVQDFR	490	-0.997548	2.95099	-0.178734	0.452595	-0.240645	0.705703	-0.435225	0.678864	-0.278397	0.829693
NOL4L	Nucleolar protein 4-like	Q96MY1	LFVDENLDR	196	-0.33999	2.94104	-0.19166	1.29809	-0.322798	2.79576	-0.272768	1.73608	-0.263771	1.14629
ARHGAP6	Rho GTPase-activating protein 6	O43182	DLSEEPFDIWGTWHSTLK	726	-1.77041	2.94065	-0.340053	0.274394	-0.541146	0.428262	-0.315068	0.311656	-0.0956577	0.090558
SIPA1L1	Signal-induced proliferation-associated 1-like protein 1	O43166	SHFQHVFVIVR	730	0.723115	2.93766	-0.420039	0.397179	0.0428038	0.067418	0.184165	0.26956	-0.87551	0.810907
PCNT	Pericentrin	O95613	DQVLSLSHEIEECR	1107	-1.80395	2.92624	-0.645963	0.806126	-0.225305	0.266381	-0.176529	0.174469	-0.771503	0.762425
PCBP1	Poly(rC)-binding protein 1	Q15365	AITIAGVPQSVTECVKQICLVMLETLSQSPQGR	145	-2.30586	2.9101	-1.36924	1.06267	-0.248699	0.138638	-0.675005	0.406961	-0.482916	0.246326
ADAR	Double-stranded RNA-specific adenosine deaminase	P55265	FQYCVAVGAQTFPSVSAPSK	646	1.32037	2.90837	0.59609	0.782885	0.839196	0.988591	-0.129857	0.167424	0.926416	1.24611
PPP6R3	Serine/threonine-protein phosphatase 6 regulatory subunit 3	Q5H9R7	YPNISCELLTSDVSQMNDR	77	-1.78139	2.90459	0.18028	0.277143	-0.000836635	0.000822816	-0.145372	0.145224	-0.00232165	0.00207176
MAP2K3	Dual specificity mitogen-activated protein kinase kinase 3	P46734	DVKPSNVLINK	190	-0.392401	2.90289	-0.0590663	0.483436	-0.0391206	0.316789	0.0003215	0.00178238	-0.00301067	0.0198756
FLNA	Filamin-A	P21333	ALTQTGGPHVK	1284	-1.69053	2.90224	0.276137	0.321925	0.278713	0.372063	0.33356	0.325425	0.609999	1.15515
GEMIN5	Gem-associated protein 5	Q8TEQ6	LVFCLLELLSR	1119	2.73332	2.90182	1.01999	0.570004	1.1266	0.677546	0.313797	0.189225	1.73468	1.16356
MED8	Mediator of RNA polymerase II transcription subunit 8	Q96G25	QLEASLDALLSQVADLK	7	-1.26232	2.89379	-1.08974	1.54665	-0.815394	1.14156	-0.987131	1.89625	-0.119519	0.0950162
YLPM1	YLP motif-containing protein 1	P49750	WADLEEKK	2101	5.95425	2.89245	6.19784	3.90612	-0.0731788	0.0648041	-0.296972	0.289881	3.24519	1.05088
AHCTF1	Protein ELYS	Q8WYP5	GSPQAISR	1159	1.4874	2.88124	0.3579	0.254895	1.0523	0.714741	0.486576	0.630405	1.25073	0.728467
ARID1A	AT-rich interactive domain-containing protein 1A	O14497	KPLDLYR	1047	0.976035	2.87468	0.907114	2.5648	0.584891	1.1424	0.78489	2.09229	0.532212	0.554794
HADHB	Trifunctional enzyme subunit beta, mitochondrial	P55084	TLAKPNIR	45	-0.821177	2.87172	0.0506263	0.199951	-0.233222	0.543953	0.020323	0.0747543	-0.755516	1.916
CDK5RAP2	CDK5 regulatory subunit-associated protein 2	Q96SN8	EQDIYTHLVK	560	-0.642962	2.86603	-0.418617	0.652787	-0.201395	0.529623	0.176006	0.699741	-0.263528	0.574136
MYO18A	Unconventional myosin-XVIIIa	Q92614	QMEVQLEEEYEDKQK	1610	-0.891916	2.86512	-0.36334	1.23069	-0.183783	0.495734	-0.209634	0.640136	-0.403349	0.954682
CHAMP1	Chromosome alignment-maintaining phosphoprotein 1	Q96JM3	KPGPPLSPEIR	421	-0.670264	2.85902	-0.140861	0.347721	0.00481391	0.0115191	0.0356845	0.0949285	-0.112514	0.352203
SEPTIN9	Septin-9	Q9UHD8	VHCCLYFIPATGHSLRPLDIEFMKR	408	1.82897	2.84333	0.468485	0.704161	0.641993	0.902538	0.321105	0.426982	0.501266	0.607431
CAND1	Cullin-associated NEDD8-dissociated protein 1	Q86VP6	TVIGELPPASSGSALAANVCKK	112	-1.96552	2.84325	-0.479621	0.472031	0.0276831	0.0223529	-0.212072	0.255275	0.493502	0.664247
DLAT	Dihydrolipoyllysine-residue acetyltransferase component of pyruvate dehydrogenase complex, mitochondrial	P10515	GRVFVSPLAK	353	-1.38787	2.84239	-0.395055	0.435086	-1.01576	1.09817	0.0662819	0.0655554	-0.585275	0.666462
CYB5R4	Cytochrome b5 reductase 4	Q7L1T6	VLNGMLPK	146	-1.04813	2.83998	-0.410981	1.41378	-0.852992	1.88585	-0.630708	0.98407	-0.803938	2.36635
HUWE1	E3 ubiquitin-protein ligase HUWE1	Q7Z6Z7	YPPSATTLHFEFYADPGAEVK	191	-0.6089	2.83779	-0.426188	2.71165	-0.195839	0.576442	-0.565761	2.32585	-0.129921	0.580492
MAP3K4	Mitogen-activated protein kinase kinase kinase 4	Q9Y6R4	VDYGSFAFVR	303	1.81674	2.83697	1.54451	2.078	1.02769	1.09941	1.3589	1.65426	0.823894	1.12821
ARRB1	Beta-arrestin-1	P49407	RDFVDHIDLVDPVDGVVLVDPEYLK	25	1.85937	2.83396	1.10225	0.917898	1.07171	0.93823	1.43397	1.50379	1.6977	1.39144
TSC1	Hamartin	Q92574	SVDWTHFGGSPPSDEIR	673	0.520526	2.82461	0.20922	0.765523	0.0732536	0.203814	0.0848911	0.142329	-0.302903	0.691501
GALK1	Galactokinase	P51570	DLVSKEGFR	268	-2.73593	2.81596	-1.08419	0.534465	-2.07919	1.25607	-1.59108	1.08997	-0.983427	0.417332
NCOA1	Nuclear receptor coactivator 1	Q15788	TGWEDLVRK	286	11.3485	2.81112	-3.56834	0.678665	-2.94953	0.532548	-2.84335	0.509848	1.85964	0.180773
ETV6	Transcription factor ETV6	P41212	ILFSPFFHPGNSIHTQPEVILHQNHEEDNCVQR	128	1.41994	2.80439	-0.10549	0.0995271	-0.739639	1.2188	-0.461984	0.363477	-0.493205	0.482914
PACS1	Phosphofurin acidic cluster sorting protein 1	Q6VY07	TDLQGSASPSKVEGVHTPR	488	-0.841657	2.80096	-0.322713	0.682979	-0.221663	0.550465	-0.352529	1.67515	-0.0434856	0.130049
GSK3A	Glycogen synthase kinase-3 alpha	P49840	ARTSSFAEPGGGGGGGGGGPGGSASGPGGTGGGK	17	-2.42929	2.79098	-0.551162	0.324978	-1.40577	0.937197	-0.0586163	0.0263422	-0.403697	0.207071
NCOR1	Nuclear receptor corepressor 1	O75376	LENTSPMVK	2198	-0.735951	2.78861	-0.0846941	0.13615	-0.108833	0.202284	0.10913	0.235366	0.193507	0.525617
SLX4IP	Protein SLX4IP	Q5VYV7	DTVETSSDSVIAEIARR	188	-1.76419	2.78541	-0.965431	0.887303	0.00307475	0.00159849	-0.571859	0.510864	-0.64017	0.684729
SYNE2	Nesprin-2	Q8WXH0	CCILQVLK	2993	3.17929	2.77786	1.18514	0.820017	1.03888	0.79874	0.795542	0.920648	0.875792	1.02566
ATP6V0D1	V-type proton ATPase subunit d 1	P61421	MSFFPELYFNVDNGYLEGLVR	1	1.66213	2.77297	-2.14887	0.560701	-0.592591	0.426877	-0.884173	1.09936	-1.7351	0.397768
KMT2A	Histone-lysine N-methyltransferase 2A	Q03164	VFPWFSVK	1765	1.78659	2.76755	1.34933	1.90843	0.736042	0.485332	1.49721	2.29647	1.16738	1.14606
TMF1	TATA element modulatory factor	P82094	NQELSQSVSSTTRPLLR	757	-0.581475	2.76408	-0.307339	0.768788	-0.324133	1.52096	-0.210243	0.816262	-0.411666	1.95988
PRKCA	Protein kinase C alpha type	P17252	DLKLDNVMLDSEGHIK	463	-1.35647	2.7635	0.0654731	0.0821188	-0.0926993	0.151029	-0.175836	0.327558	-0.720201	1.1601
TTF1	Transcription termination factor 1	Q15361	TIGEMVAR	641	3.94682	2.75902	1.06955	0.392583	2.40001	0.900749	2.17157	1.04343	1.07421	0.688091
BRD7	Bromodomain-containing protein 7	Q9NPI1	EMEITEVEPPGRLDSSTQDR	498	-0.907147	2.75728	-0.355148	0.584997	-0.0329413	0.0440911	-0.579682	0.584773	-0.0817794	0.106859
MED1	Mediator of RNA polymerase II transcription subunit 1	Q15648	TASPIILHENNVSR	236	2.40611	2.75487	1.82437	2.29158	1.90092	2.27646	1.29818	1.30955	1.58456	1.50397
DDX12P	Putative ATP-dependent RNA helicase DDX12	Q92771	LAIPAAQLVVLPYQMLLHAATR	376	-2.74619	2.75345	-1.09694	0.706155	0.0963912	0.0642177	0.18303	0.141419	-0.640343	0.511077
RAP1GDS1	Rap1 GTPase-GDP dissociation stimulator 1	P52306	EVQDLAFLDVVSK	571	-0.641382	2.75331	-0.145111	0.358369	-1.19806	0.642474	-0.138579	0.356817	-0.272739	0.428538
ADNP	Activity-dependent neuroprotector homeobox protein	Q9H2P0	LNQSPSLAPVK	706	0.74651	2.75097	-0.799085	0.391561	-0.178723	0.317947	-0.692182	0.504773	-0.0806603	0.118758
STOML2	Stomatin-like protein 2, mitochondrial	Q9UJZ1	QAQILASEAEKAEQINQAAGEASAVLAK	223	-2.30957	2.74811	-3.36912	5.16862	-2.06868	1.28993	-0.559884	0.339795	-1.28962	0.823695
GEMIN6	Gem-associated protein 6	Q8WXD5	AYSPEDLEER	93	0.381961	2.73994	-0.0134088	0.0587974	0.103982	0.407368	0.120331	0.768502	0.172513	1.15617
UBE2Z	Ubiquitin-conjugating enzyme E2 Z	Q9H832	LHLQGQTMQDPFGEK	290	-1.64149	2.73994	-0.165735	0.212295	0.369342	0.865845	0.202698	0.391167	-0.00738402	0.0105589
NGLY1	Peptide-N(4)-(N-acetyl-beta-glucosaminyl)asparagine amidase	Q96IV0	DLIAIER	103	2.33539	2.73951	1.48341	1.2349	0.949141	0.943406	1.12359	0.931958	1.4377	0.782826
MSH2	DNA mismatch repair protein Msh2	P43246	GDFYTAHGEDALLAAR	40	-1.24971	2.73948	-1.07532	1.48093	-0.730876	0.505975	-0.59459	0.433417	-0.0477209	0.0562864
SLX4	Structure-specific endonuclease subunit SLX4	Q8IY92	KVDEAPSEDLLVAMALSR	412	1.65691	2.72788	0.674006	1.01811	1.17799	1.67413	0.316005	0.350492	0.318216	0.297975
TRAPPC12	Trafficking protein particle complex subunit 12	Q8WVT3	QVLNADSVEQSFVGLK	370	0.406738	2.72717	-0.0922448	0.187979	-0.676586	0.748002	-0.169409	0.401605	-0.625257	1.03643
PPP1R3F	Protein phosphatase 1 regulatory subunit 3F	Q6ZSY5	ALNSALAEEITLHYAR	544	2.5987	2.72386	1.57688	1.22795	1.97732	1.87472	2.69185	2.94526	1.96028	1.72055
SRPRB	Signal recognition particle receptor subunit beta	Q9Y5M8	GDVGSADIQDLEK	253	0.727637	2.72158	0.265951	0.706385	0.0432857	0.0827512	0.178092	0.48975	-0.304534	0.38078
DDX52	Probable ATP-dependent RNA helicase DDX52	Q9Y2R4	AGKIWVLICTALLAR	460	-1.20834	2.71666	-0.904183	1.61809	-0.410239	0.578213	-0.451429	0.612256	0.124467	0.145603
MAP4K2	Mitogen-activated protein kinase kinase kinase kinase 2	Q12851	ASDPHLGTPSPEDCELETYDMFPDTIHSR	289	-1.10593	2.70185	0.162086	0.598674	0.016633	0.03874	-0.121496	0.345907	0.0508442	0.11582
WDR7	WD repeat-containing protein 7	Q9Y4E6	GPTRPPRPSTPDLSK	917	-1.57724	2.70174	-1.79036	1.28918	-0.211553	0.236868	-0.301391	0.373476	-0.568663	0.602175
APC	Adenomatous polyposis coli protein	P25054	GTEIKPGQNNPVPVSETNESSIVERTPFSSSSSSK	2735	2.24323	2.69768	0.100854	0.0394878	-0.257958	0.131181	0.162503	0.0823074	0.126811	0.0596963
CBX5	Chromobox protein homolog 5	P45973	GLEPEKIIGATDSCGDLMFLMK	120	-0.336002	2.69472	0.0604855	0.250511	0.034412	0.251747	-0.0375097	0.135028	-0.10931	0.484061
FOCAD	Focadhesin	Q5VW36	FPLVNLTDMLSVAVQHR	1595	1.2365	2.69417	1.04681	1.56907	0.20902	0.229106	0.700367	0.888503	1.03392	1.75503
CEP131	Centrosomal protein of 131 kDa	Q9UPN4	SSNQTAPSLNNIIK	201	-0.405168	2.68534	-0.128646	0.743925	-0.255695	1.61772	-0.159805	0.758215	-0.0191899	0.0367665
TRERF1	Transcriptional-regulating factor 1	Q96PN7	NLPALNGHMR	523	-1.01196	2.68045	0.220739	0.512893	-0.0931384	0.17044	-0.196441	0.151882	-0.173349	0.381046
KAT7	Histone acetyltransferase KAT7	O95251	EISQETAVNPVDIVSTLQALQMLK	543	-3.39278	2.67897	-1.18288	0.462941	0.186403	0.0651425	0.21801	0.0975441	-0.612493	0.248409
SMC1A	Structural maintenance of chromosomes protein 1A	Q14683	SDRHNLLQACK	924	-0.574712	2.67284	-0.285481	1.20108	-0.169084	0.667103	-0.310166	1.4461	-0.177593	0.768662
SNRPB2	U2 small nuclear ribonucleoprotein B''	P08579	GQAFVIFKELGSSTNALR	50	2.30822	2.67234	0.32252	0.425143	0.613526	0.974991	0.562118	0.429622	1.63042	1.42569
DGKH	Diacylglycerol kinase eta	Q86XP1	ATNNCKWTTLASIGK	221	-2.18553	2.66764	-0.918428	1.47535	-0.0650445	0.0464265	-0.423437	0.53618	-0.54175	0.674385
ROCK2	Rho-associated protein kinase 2	O75116	ELNEMQAQIAEESQIR	1087	2.26855	2.66761	0.453671	0.152709	0.563326	0.176635	2.47806	2.70425	1.6595	0.791285
ZNF385A	Zinc finger protein 385A	Q96PM9	TKRPVISCNICQIR	69	-0.720461	2.66433	-0.376799	0.714238	0.105502	0.159175	0.21047	0.810821	0.17735	0.439523
CABLES1	CDK5 and ABL1 enzyme substrate 1	Q8TDN4	NTIDSTSSFSQFR	414	0.326473	2.65872	0.117141	0.843597	0.0915544	0.620464	0.0879685	0.375162	0.0213761	0.0817966
DEPDC5	GATOR1 complex protein DEPDC5	O75140	GLSPYCFISAEVVHWLVNHVEGIQTQAMAIDIMQK	1199	2.05675	2.6537	0.768087	0.592509	0.446905	0.305122	-0.477597	0.305804	1.04369	1.33776
IDNK	Probable gluconokinase	Q5T6J7	VVLACSALKK	79	-1.15664	2.64945	-0.605482	1.2134	-0.333361	0.331555	-0.0668575	0.101201	-0.0656634	0.10895
RPF2	Ribosome production factor 2 homolog	Q9H7B2	KNISHDTFGTTYGR	252	-1.23265	2.64459	-0.76845	1.23845	-0.903685	0.868345	-1.47913	2.04888	-0.872728	1.44289
MAGED2	Melanoma-associated antigen D2	Q9UNF1	EAMEADLK	477	0.299674	2.64437	0.197947	1.20183	0.0942474	0.37556	0.190355	1.74816	0.0225262	0.107763
EHMT1	Histone-lysine N-methyltransferase EHMT1	Q9H9B1	AAADAEAVPAR	2	-1.76907	2.63928	-0.19532	1.24525	-0.377397	1.20355	-0.209703	1.23579	-0.142189	0.687039
EYA3	Eyes absent homolog 3	Q99504	KADATSSQDSELER	291	1.56732	2.63799	0.436445	0.417226	0.132902	0.096727	-0.519276	0.647779	0.823878	0.8578
TMPO	Lamina-associated polypeptide 2, isoforms beta/gamma	P42167	QEDKDDLDVTELTNEDLLDQLVK	104	0.568585	2.63628	0.0159321	0.0409856	-0.321202	1.20976	-0.643965	2.49926	-0.660652	2.47656
SYT17	Synaptotagmin-17	Q9BSW7	VSVPLCEVDLVK	293	-2.93605	2.63507	0.479884	0.192593	1.28443	0.837329	1.84076	1.38216	0.608967	0.263859
UBE2O	(E3-independent) E2 ubiquitin-conjugating enzyme	Q9C0C9	GEVFSVLEFAPSNHSFK	926	-1.04103	2.63386	-0.0102002	0.0178652	0.221653	0.519633	0.100281	0.189086	0.400772	1.11376
MYO1B	Unconventional myosin-Ib	O43795	QTWPHWKGPAR	651	0.723862	2.63231	0.115828	0.201921	0.0544112	0.0998261	-0.433911	0.266238	-0.484856	0.499819
AKAP8L	A-kinase anchor protein 8-like	Q9ULX6	TVEDLDGLIQQIYRDQDLTQEIAMEHFVK	449	-2.05517	2.62763	-0.693972	0.526496	-0.296095	0.232178	-0.173825	0.144017	-1.14074	0.711407
ACTB	Actin, cytoplasmic 1	P60709	VAPEEHPVLLTEAPLNPKANR	96	-0.911069	2.62165	-0.342135	0.86453	0.108497	0.302754	-0.0601008	0.116395	0.186038	0.477094
VPS33B	Vacuolar protein sorting-associated protein 33B	Q9H267	LMEAMSEVKA	608	-4.73726	2.61859	-1.39328	0.620812	-3.0658	1.43674	-2.64295	0.993111	-1.24601	0.620256
VCL	Vinculin	P18206	MTGLVDEAIDTK	709	-1.2709	2.61513	-0.52074	0.378272	0.0555801	0.0331598	-0.0446646	0.019945	0.239942	0.203647
KCTD3	BTB/POZ domain-containing protein KCTD3	Q9Y597	NGLNSTEGEAR	150	-2.5071	2.60516	-0.2165	0.341743	-0.535746	0.411289	-0.815457	0.808448	-0.397351	0.381739
SPINDOC	Spindlin interactor and repressor of chromatin-binding protein	Q9BUA3	SNILEAWSEGVALLQDVR	126	-2.10207	2.6014	-1.182	0.697463	0.59001	0.407817	-0.248739	0.162624	-2.28114	2.25986
SMARCE1	SWI/SNF-related matrix-associated actin-dependent regulator of chromatin subfamily E member 1	Q969G3	IAAEIAQAEEQARK	285	-1.00542	2.59918	0.000290158	0.000335365	-0.147458	0.162508	0.0155053	0.0153703	-0.688943	0.464377
PDXDC1	Pyridoxal-dependent decarboxylase domain-containing protein 1	Q6P996	HDDPALTLVAGLTSNKPTDK	316	-1.87464	2.59446	-0.838225	0.745239	-0.595329	0.311642	-0.215785	0.0983833	-0.995395	0.946973
PRPF8	Pre-mRNA-processing-splicing factor 8	Q6P2Q9	GPGCGFWAAGWR	624	-0.721355	2.59367	-0.138701	0.526812	-0.370711	1.11057	0.0748722	0.173054	-1.13029	1.1368
GPRC5C	G-protein coupled receptor family C group 5 member C	Q9NQ84	ATANSQVMGSANSTLR	394	2.00278	2.59295	-0.51421	0.250351	-0.635019	0.496211	0.702676	0.397672	-0.139146	0.0640552
BOD1L1	Biorientation of chromosomes in cell division protein 1-like 1	Q8NFC6	RTSTPVIMEGVQEETDTR	657	-1.06131	2.58627	-0.40865	0.445876	0.113996	0.181612	-0.287421	0.249195	0.215956	0.471406
KIF1A	Kinesin-like protein KIF1A	Q12756	TPNTFAVCTEHR	1638	-0.201169	2.58549	-0.0316813	0.325932	-0.00659643	0.039452	-0.0476779	0.679817	-0.100627	1.53012
DDX3X	ATP-dependent RNA helicase DDX3X	O00571	TAAFLLPILSQIYSDGPGEALR	231	1.68796	2.57806	0.563432	0.428595	0.664378	0.654007	-0.0659588	0.0629796	0.7583	0.796437
ALDH18A1	Delta-1-pyrroline-5-carboxylate synthase	P54886	TDLLIVLSDVEGLFDSPPGSDDAK	259	-2.39729	2.57617	0.246732	0.155465	-0.373958	0.20295	-0.169885	0.11132	-0.26961	0.13556
SPAG5	Sperm-associated antigen 5	Q96R06	SLQCENLKDTVENLTAK	835	0.737114	2.57565	0.0709793	0.0956913	-0.453942	0.554532	-0.506701	0.608849	-0.768808	0.982797
PI4KA	Phosphatidylinositol 4-kinase alpha	P42356	LLTLGLSLLHADVVPNATIR	1352	-2.0509	2.57403	-1.36168	2.53503	-0.579927	0.958705	-1.10876	2.48819	-0.736522	0.801871
CHMP4A	Charged multivesicular body protein 4a	Q9BY43	LPSVPSTHLPAGPAPKVDEDEEALK	191	3.7611	2.57197	1.73853	0.711316	1.34386	0.600404	1.50354	0.650715	1.49654	0.604078
RBM5	RNA-binding protein 5	P52756	NSFQPVNSLREEERR	560	-0.301532	2.57084	-0.194485	1.54008	-0.316387	1.51722	-0.254182	1.17993	-0.309166	1.18482
NUP205	Nuclear pore complex protein Nup205	Q92621	VHNLITDFLALMPMK	392	1.57034	2.56668	1.0573	1.11284	0.617288	0.712098	-0.0405286	0.0366411	1.44826	1.71006
WASF2	Actin-binding protein WASF2	Q9Y6W5	YAEDIFGELFTQANTFASR	46	-1.1519	2.56538	0.440864	0.413062	-0.409112	0.625579	-0.200474	0.33217	-0.938999	1.88222
STAU1	Double-stranded RNA-binding protein Staufen homolog 1	O95793	KTKPIVKPQTSPEYGQGINPISR	268	1.59357	2.56413	0.429639	0.317046	1.04038	1.48566	0.089404	0.0420958	0.325437	0.157195
RNF213	E3 ubiquitin-protein ligase RNF213	Q63HN8	MKQPPATTPPFK	296	-0.850313	2.56285	-1.40333	0.891839	-0.835676	0.988299	-0.317015	0.239487	-0.495308	0.524704
PDP1	[Pyruvate dehydrogenase [acetyl-transferring]]-phosphatase 1, mitochondrial	Q9P0J1	FLVLATDGLWETMHR	412	-0.650348	2.5617	-0.740838	2.04847	-0.925369	1.75884	-0.468963	1.2405	-1.08284	2.2274
ORC3	Origin recognition complex subunit 3	Q9UBD5	LQEELNKNLFDNLIEFLQK	61	-1.89614	2.56077	-2.30147	0.719843	0.130366	0.0971572	-0.74509	0.409545	0.217008	0.131408
IDH2	Isocitrate dehydrogenase [NADP], mitochondrial	P48735	MWKSPNGTIR	131	2.82151	2.55971	0.524297	0.214455	1.26003	0.672247	2.67449	2.3206	1.2351	0.779599
MTG1	Mitochondrial ribosome-associated GTPase 1	Q9BT17	GLLGSVMLDLDVLR	312	-1.1705	2.55876	-0.754533	1.17806	-0.299235	0.394284	0.0096639	0.0102772	0.156001	0.122684
SMG8	Nonsense-mediated mRNA decay factor SMG8	Q8ND04	RPNFVDR	733	-1.38188	2.55711	-0.215296	0.531334	-0.214343	0.306672	0.0610526	0.113218	-0.0311747	0.0567056
SMC2	Structural maintenance of chromosomes protein 2	O95347	NQALNIAWQK	1027	0.606513	2.55314	0.273726	0.890916	0.165368	0.446288	0.354346	1.21716	0.334202	1.25333
UNC13D	Protein unc-13 homolog D	Q70J99	DQGQAANMLCVVVNDMEQLR	690	1.10098	2.54824	1.01183	1.91532	0.609082	0.558407	0.661438	0.367398	0.766119	0.929578
KANK2	KN motif and ankyrin repeat domain-containing protein 2	Q63ZY3	AQSLEPYGTGLR	354	-1.83273	2.54751	-0.49349	0.285918	-1.76981	1.37863	-1.54598	1.87434	-1.12409	1.31563
KLRG2	Killer cell lectin-like receptor subfamily G member 2	A4D1S0	AAGAGLEPSSK	57	-0.750746	2.54652	0.0224876	0.0306164	-0.258866	0.429073	0.0434725	0.0963452	-0.0780787	0.125368
PSMB4	Proteasome subunit beta type-4	P28070	SGLWAGGPAPGQFYR	9	-0.549593	2.53989	-0.311493	0.952158	-0.255267	0.823727	-0.374531	1.28677	-0.987543	3.77159
ADSL	Adenylosuccinate lyase	P30566	ICLAEAFLTADTILNTLQNISEGLVVYPK	339	2.18757	2.53431	0.297922	0.126641	0.807367	0.32607	-0.132729	0.0448673	0.400839	0.249747
CCDC136	Coiled-coil domain-containing protein 136	Q96JN2	LLVVQEQLEGQLQCCQEELRQLR	946	3.74249	2.53416	2.08915	0.898706	3.10709	1.66786	2.21288	1.13615	3.62682	4.01353
C12orf4	Protein C12orf4	Q9NQ89	LLRADMLDFCK	290	-1.54512	2.53325	-0.643373	0.503945	-0.20115	0.13994	0.625985	0.607508	-1.69006	2.40354
CCDC22	Coiled-coil domain-containing protein 22	O60826	RPEQVTWAAQEQELESLR	321	1.61816	2.53312	1.10607	1.05546	0.61541	0.714796	-0.530038	0.561205	0.403102	0.368918
GCN1	Stalled ribosome sensor GCN1	Q92616	AALLETLSLLLAK	2324	-1.95772	2.53241	-0.485672	0.317188	0.316619	0.204522	-0.15107	0.0744562	-1.14674	1.35405
HK2	Hexokinase-2	P52789	SEDGSGKGAAMVTAVAYR	445	-1.97676	2.53194	-0.434872	0.598542	-0.0562984	0.086181	-0.11743	0.249437	0.226988	0.87334
HERC1	Probable E3 ubiquitin-protein ligase HERC1	Q15751	AMEATGAR	2770	-3.22642	2.53063	-1.49026	0.736013	-0.384004	0.138542	-0.0288503	0.0109186	0.556985	0.375583
XRN2	5'-3' exoribonuclease 2	Q9H0D6	KYAWQGVALLPFVDER	641	1.14236	2.52881	-0.0749346	0.0433057	0.228083	0.184736	0.967199	1.61792	0.413173	0.285521
CIRBP	Cold-inducible RNA-binding protein	Q14011	SRGFGFVTFENIDDAKDAMMAMNGK	46	-0.77619	2.52846	-0.212462	0.27126	0.0319934	0.0455933	-0.504089	1.40146	-0.334587	0.37395
WASHC2A	WASH complex subunit 2A	Q641Q2	VQEAVNYGLQVLDSAFEQLDIK	133	-1.5561	2.52827	-1.02023	0.610907	-1.25751	1.72791	-0.759573	0.331202	-0.318101	0.305347
MED24	Mediator of RNA polymerase II transcription subunit 24	O75448	WSDYQWAINMK	18	-0.705164	2.5225	0.0755884	0.221777	0.0358908	0.0860184	0.203272	0.868719	-0.0847243	0.126974
PTPA	Serine/threonine-protein phosphatase 2A activator	Q15257	VSEMWNEVHEEKEQAAK	70	-1.89224	2.52234	-0.107769	0.101056	-0.459567	0.619243	-0.188701	0.170669	-0.160389	0.110197
STIM1	Stromal interaction molecule 1	Q13586	AHSLMELSPSAPPGGSPHLDSSR	593	-0.443352	2.52108	-0.00906258	0.0237858	-0.100978	0.203825	-0.240563	0.692662	-0.112844	0.254471
PRRC2C	Protein PRRC2C	Q9Y520	NGQESGLEIGTDTIQFGAPASNGNENEVVPVLSEK	2041	-1.51298	2.50904	-0.566026	0.385509	-2.33247	1.90429	-1.21857	0.75207	-0.130215	0.0707607
PPIG	Peptidyl-prolyl cis-trans isomerase G	Q13427	VVKDFMVQGGDFSEGNGR	68	0.982396	2.50621	0.0472984	0.0364931	0.734614	1.63836	0.901831	1.92203	0.65241	1.53541
NSA2	Ribosome biogenesis protein NSA2 homolog	O95478	VLSNMIK	101	-2.08264	2.50344	-0.567637	0.239192	-0.183584	0.0889863	-0.448654	0.268221	-0.81119	0.699169
HELLS	Lymphoid-specific helicase	Q9NRZ9	ETIELSPTGRPK	498	-0.716594	2.50276	-0.445692	0.806672	-0.293264	1.08758	-0.582671	1.59186	-0.940368	1.24187
CABIN1	Calcineurin-binding protein cabin-1	Q9Y6J0	DVLLGSSIPWQQLQHMPAQGLFCER	1551	1.39383	2.49898	1.08624	1.21729	0.199366	0.191006	-0.35915	0.345029	1.32161	2.82077
DRG2	Developmentally-regulated GTP-binding protein 2	P55039	HKPNIYFKPK	173	1.3398	2.49583	1.56547	2.16465	0.376403	0.359715	-0.000850393	0.000474063	0.28759	0.228018
XPO1	Exportin-1	O14980	LNMILVQILKQEWPK	130	-1.46253	2.4932	-1.68969	1.25992	-0.455638	0.425235	0.00296528	0.00221787	-0.356933	0.210756
MKI67	Proliferation marker protein Ki-67	P46013	CAPMSDLTDLK	958	0.957559	2.49156	0.133285	0.0763523	0.457894	0.760541	0.957066	1.66708	1.45445	2.52741
PPP4C	Serine/threonine-protein phosphatase 4 catalytic subunit	P60510	DFIIFEAAPQETR	282	0.47274	2.49105	-0.4101	0.505516	0.155551	0.504258	-0.0573443	0.150233	0.0307879	0.0799134
NSF	Vesicle-fusing ATPase	P46459	FLALLREEGASPLDFD	729	0.595353	2.49093	0.120107	0.21461	-0.0578121	0.0939946	0.0731809	0.141538	-0.166551	0.453866
RREB1	Ras-responsive element-binding protein 1	Q92766	AELPGQPEMK	584	-0.390468	2.48833	-0.215242	0.928543	-0.132326	0.508622	-0.246316	0.723305	-0.25742	0.757151
SDCCAG8	Serologically defined colon cancer antigen 8	Q86SQ7	AQALQAQQR	555	1.29408	2.48524	0.187026	0.138976	0.118202	0.126227	-0.121465	0.0685085	-0.291719	0.144363
SRP72	Signal recognition particle subunit SRP72	O76094	ISASLQSQSPEHLLPVLIQAAQLCR	326	-1.84023	2.48388	0.372485	0.285618	0.690043	1.25113	0.597047	0.483546	0.107927	0.0469123
CCT6A	T-complex protein 1 subunit zeta	P40227	KQLLHSCTVIATNILLVDEIMR	502	2.07245	2.48363	1.47753	1.15064	1.65522	1.57285	0.943413	0.83498	1.69355	2.03914
ARFGEF3	Brefeldin A-inhibited guanine nucleotide-exchange protein 3	Q5TH69	EIGDCAPAPGAPSTDLCLPALDYLRR	1372	2.14076	2.48324	1.23731	0.689459	1.11257	0.670803	1.38968	1.03029	2.20394	2.59973
CCDC85B	Coiled-coil domain-containing protein 85B	Q15834	AVREDLGGCWQK	108	1.39553	2.48253	0.526215	0.80758	0.801104	0.981484	0.737509	0.701251	-0.0685117	0.0553381
ARHGAP5	Rho GTPase-activating protein 5	Q13017	MSEIHTVLSEEPRYK	515	1.76595	2.48188	0.665152	0.4009	0.847893	0.910844	1.8936	3.47446	1.43249	1.60992
VASP	Vasodilator-stimulated phosphoprotein	P50552	QVWGLNFGSK	87	-1.64597	2.4811	-2.12608	2.0829	-0.982664	0.802999	-0.616167	0.652778	-0.967261	1.30087
ERAL1	GTPase Era, mitochondrial	O75616	CQALGVITEKETQVILLDTPGIISPGK	150	-1.64749	2.47884	-1.07579	1.00739	-0.146027	0.143835	-0.981464	1.82455	-0.829865	1.01503
FAM83E	Protein FAM83E	Q2M2I3	LEIQAAHKLVAVVMDVFTDPDLLLDLVDAATR	148	1.169	2.47598	0.328381	0.326656	-0.759738	0.968529	0.374153	0.352222	-0.00128025	0.000626098
SARS1	Serine--tRNA ligase, cytoplasmic	P49591	YLIATSEQPIAALHR	267	-1.21662	2.4741	-1.18386	1.7322	-0.818803	1.40907	-0.986873	1.58612	-0.329015	0.390199
BTBD10	BTB/POZ domain-containing protein 10	Q9BSF8	FVVDPSIFTAQPNTMLGR	178	-1.51804	2.47347	-2.92406	2.32884	-2.0126	1.75984	-1.71029	1.08805	-2.11686	1.767
ZC3HAV1L	Zinc finger CCCH-type antiviral protein 1-like	Q96H79	QGVHAAGAAEAGPLASVPAQSAK	269	0.298471	2.46247	-0.119458	0.343931	0.171032	0.948954	0.177381	0.859513	-0.205892	0.459073
PANK4	4'-phosphopantetheine phosphatase	Q9NVE7	QQPFAYGTLTVR	493	0.288853	2.46117	-0.0360381	0.156132	-0.149452	0.72477	0.130121	0.938227	0.274601	2.03643
USP3	Ubiquitin carboxyl-terminal hydrolase 3	Q9Y6I4	VREHLQNLENSAFTADR	114	-1.99702	2.4602	-0.369928	0.476007	-0.565912	0.292941	-0.0191444	0.00990785	-0.27563	0.333724
CDC42EP4	Cdc42 effector protein 4	Q9H3Q1	NGAAGPHSPDPLLDEQAFGDLTDLPVVPK	167	0.700796	2.45596	0.305785	0.800207	0.111818	0.149268	-0.0308122	0.0320479	-0.031475	0.0415415
WDR81	WD repeat-containing protein 81	Q562E7	DLHHWIDLTFGYK	540	1.28833	2.45391	0.425115	0.402049	1.04067	1.55661	-0.115521	0.0919498	0.349759	0.337763
PC	Pyruvate carboxylase, mitochondrial	P11498	VTTEDPAR	378	0.494772	2.45331	0.0338658	0.0944272	-0.352344	0.467151	-0.515408	0.858374	-0.51008	0.615111
EHMT1	Histone-lysine N-methyltransferase EHMT1	Q9H9B1	TRDMGWGVR	1133	-2.04971	2.44813	-1.97188	1.06313	-0.836615	0.718027	-2.25909	3.16249	-1.71701	2.06995
BICRA	BRD4-interacting chromatin-remodeling complex-associated protein	Q9NZM4	TFQMVTTPFPALPQPK	942	1.50663	2.4448	1.06059	0.793905	1.3351	1.45846	0.774419	0.636697	0.880681	0.524997
ZMIZ1	Zinc finger MIZ domain-containing protein 1	Q9ULJ6	AFQRPFEQSLMGCLTVVSR	44	-1.86656	2.44145	-2.14652	2.80529	-0.854875	0.769177	-1.84676	1.58227	-0.620697	0.361432
SEPTIN7	Septin-7	Q16181	VQCCLYFIAPSGHGLKPLDIEFMKR	158	-2.20144	2.43544	-0.486537	0.497407	-1.1733	1.58792	-1.0613	1.35267	-0.260883	0.30457
DGLUCY	D-glutamate cyclase, mitochondrial	Q7Z3D6	KIPGISSTGVGDGGNELGMGK	469	-0.433162	2.4354	-0.11946	0.30622	-0.159573	0.517606	-0.139835	0.530428	0.01184	0.0327715
POLI	DNA polymerase iota	Q9UNA4	ILEKELGISVAQR	293	-1.37234	2.42402	0.101292	0.16754	0.0916348	0.159489	0.273091	0.475055	0.502733	1.34237
MSH2	DNA mismatch repair protein Msh2	P43246	LLLAVFVTPLTDLR	431	-2.50088	2.4237	-1.42963	1.08865	-0.160913	0.122631	0.229113	0.119728	-0.809438	0.614635
KATNA1	Katanin p60 ATPase-containing subunit A1	O75449	SVSAADIERYEK	472	0.851454	2.42166	-0.135205	0.124932	-0.465808	0.415732	0.0289525	0.0238173	-0.348088	0.443725
TIMM9	Mitochondrial import inner membrane translocase subunit Tim9	Q9Y5J7	LTETCFLDCVKDFTTR	24	0.583339	2.41933	0.431556	1.13336	0.695467	3.11193	0.428643	1.13883	0.419552	1.71524
RBM15B	Putative RNA-binding protein 15B	Q8NDT2	QLLLYDRPLKVEPVYLR	204	-1.7937	2.41511	0.188008	0.0996073	0.886528	1.03434	0.645619	0.686809	0.886814	1.00513
SMC4	Structural maintenance of chromosomes protein 4	Q9NTJ3	LNEPIKVLCR	263	0.444557	2.41484	0.132159	0.21784	0.29941	1.55831	0.344371	1.01584	0.399842	1.15172
MKS1	Tectonic-like complex member MKS1	Q9NXB0	AFMESSSLQK	498	-2.89666	2.41368	-0.719983	0.313388	-2.17323	0.96236	0.412265	0.230529	-0.350839	0.173867
LIMD1	LIM domain-containing protein 1	Q9UGP4	AFYFVNGK	511	-1.43973	2.40993	-1.24774	1.77255	-0.469602	0.443404	-0.872969	1.0575	-0.33554	0.201616
USP11	Ubiquitin carboxyl-terminal hydrolase 11	P51784	CPFLLDNCLGTSQWPPR	694	1.02713	2.40907	-0.27022	0.127016	0.589607	1.34382	0.138084	0.179473	-0.562472	0.442717
MYH9	Myosin-9	P35579	ELEDATETADAMNREVSSLK	1899	1.51498	2.40596	0.895767	1.24086	0.0752674	0.0399295	-0.722437	0.504174	0.278549	0.142876
APOL2	Apolipoprotein L2	Q9BQE5	VMKEFVGGNTPNVLTLVDNWYQVTQGIGR	194	2.51191	2.4051	1.74711	1.44713	1.21397	0.817363	0.151691	0.124739	2.14802	2.02685
KANK2	KN motif and ankyrin repeat domain-containing protein 2	Q63ZY3	SSGLSTPVPPSAGHLAHVR	171	-0.890208	2.40332	-0.454596	0.89524	0.321978	0.474804	-0.19284	0.167678	0.268616	0.287126
CYFIP1	Cytoplasmic FMR1-interacting protein 1	Q7L576	VMAGSLLLDKR	716	-0.584764	2.40308	-0.232696	0.527463	-0.318818	1.03125	-0.551285	0.59992	-0.471023	1.02997
SUMO1	Small ubiquitin-related modifier 1	P63165	VKMTTHLK	38	-1.11985	2.40068	-0.857564	1.62738	-0.942142	2.16225	-0.418965	0.805719	-0.927194	2.44295
ANKS1A	Ankyrin repeat and SAM domain-containing protein 1A	Q92625	NLWELELVNVLK	804	-1.49172	2.39833	-0.677386	1.03174	-0.384645	0.42277	0.240503	0.426228	-0.609549	0.971465
CTNNAL1	Alpha-catulin	Q9UBT7	SIAEELELSILK	374	1.12448	2.39105	1.04678	1.85371	1.21924	2.2483	1.50867	2.66968	1.42548	2.15514
NECAP2	Adaptin ear-binding coat-associated protein 2	Q9NVZ3	AAEWQLDQPSWSGR	32	0.220533	2.39096	-0.937092	0.528771	0.05633	0.218349	-0.227175	0.655402	-0.88731	0.445039
BTAF1	TATA-binding protein-associated factor 172	O14981	QLTANYR	1422	2.24082	2.38843	-1.13522	0.710819	0.166641	0.0602927	0.401545	0.165008	1.41427	0.727234
LPIN2	Phosphatidate phosphatase LPIN2	Q92539	TATITPSENTHFR	287	0.306624	2.38742	0.0470807	0.231098	0.110873	0.496395	0.196322	1.24572	0.179076	1.29964
RNF20	E3 ubiquitin-protein ligase BRE1A	Q5VTR2	QDFEEVTTQNEK	351	0.531877	2.38687	-0.263662	0.557121	-0.0813883	0.128761	-0.546641	0.569143	-0.234964	0.356545
XRCC6	X-ray repair cross-complementing protein 6	P12956	FDDPGLMLMGFKPLVLLKK	340	-0.3388	2.38267	0.0528831	0.327137	0.140307	1.01027	0.0931036	0.721821	0.0104723	0.0338237
SFSWAP	Splicing factor, suppressor of white-apricot homolog	Q12872	AKENDLLPLEK	585	0.546671	2.38044	0.140391	0.342561	0.15152	0.444947	0.165281	0.282607	0.102676	0.265713
PPL	Periplakin	O60437	EVSDLTR	1129	-0.388845	2.37924	-0.13391	0.553305	-0.136469	1.08329	-0.124668	0.858056	0.0560107	0.186762
CPOX	Oxygen-dependent coproporphyrinogen-III oxidase, mitochondrial	P36551	EAEILEVLR	439	-2.37235	2.37477	-0.182043	0.174054	-0.184075	0.216248	-0.0716854	0.0858312	-0.757429	0.674946
MCM6	DNA replication licensing factor MCM6	Q14566	VYPYLCR	86	-0.708185	2.37337	-0.214948	0.288772	-0.290383	0.478864	-0.752111	1.11267	-1.28693	2.20797
PPP2R5D	Serine/threonine-protein phosphatase 2A 56 kDa regulatory subunit delta isoform	Q14738	DVVTEAIYPEAVTMFSVNLFR	161	-2.21069	2.3712	-1.13651	1.25265	-0.71219	1.26845	-0.428786	0.726843	-0.443451	0.433046
ILRUN	Protein ILRUN	Q9H6K1	NTWAPAPDTWAPAPDQTEQDQNR	241	0.591392	2.3699	0.180512	0.428869	0.500376	2.07421	0.175292	0.456542	-0.127394	0.0976064
SCPEP1	Retinoid-inducible serine carboxypeptidase	Q9HB40	AGHMVPSDQGDMALK	429	-0.420855	2.36946	-0.129654	0.697185	-0.223941	1.4229	-0.232906	0.901163	-0.201471	0.447672
NT5C3A	Cytosolic 5'-nucleotidase 3A	Q9H0P0	NTEYFNQLKDNSNIILLGDSQGDLR	259	2.40203	2.36852	1.07331	0.619779	1.34317	0.732601	1.78061	1.20833	2.63885	2.72945
MAD1L1	Mitotic spindle assembly checkpoint protein MAD1	Q9Y6D9	EKMQMELSHKR	70	1.94883	2.3675	1.29179	1.32601	0.601839	0.486591	1.35332	1.45256	0.976889	0.754851
AFG2A	ATPase family gene 2 protein homolog A	Q8NB90	HPSIIFIDELDALCPK	446	-1.66152	2.36748	-0.195032	0.157998	-0.538556	0.224419	0.301777	0.163467	-0.296094	0.175036
RAD50	DNA repair protein RAD50	Q92878	FQQEKEELINKK	922	-0.855044	2.36395	-0.523523	1.28205	-0.684111	0.944849	-0.275607	0.625375	-0.488874	0.8847
PRR12	Proline-rich protein 12	Q9ULL5	FLENVNKK	1649	-2.72387	2.36033	0.211351	0.0702353	-0.566634	0.186842	-0.530831	0.239733	-1.31278	0.609442
RPN2	Dolichyl-diphosphooligosaccharide--protein glycosyltransferase subunit 2	P04844	NFESLSEAFSVASAAAVLSHNR	245	1.33721	2.35611	0.652547	0.7358	0.674634	0.598412	1.15767	1.99852	0.963901	1.56811
CEP170B	Centrosomal protein of 170 kDa protein B	Q9Y4F5	APAEPQGCSFR	210	0.262753	2.35162	0.141348	1.22295	0.195535	1.80109	0.211491	1.85439	0.189047	1.63497
LIMCH1	LIM and calponin homology domains-containing protein 1	Q9UPQ0	KDTDDIESPK	162	-2.23101	2.35043	-1.18044	0.810837	0.264169	0.132175	-0.301238	0.210783	0.827381	0.389608
XRN2	5'-3' exoribonuclease 2	Q9H0D6	AALEEVYPDLTPEETRR	660	-0.225709	2.34932	-0.165479	0.848877	-0.0817346	0.661256	-0.308125	0.768035	0.0261208	0.136369
DEPTOR	DEP domain-containing mTOR-interacting protein	Q8TB45	SPSSQETHDSPFCLRK	235	-1.02759	2.34853	-0.592826	0.778913	-0.152981	0.169175	0.0216674	0.0246352	0.335421	0.479401
RARS1	Arginine--tRNA ligase, cytoplasmic	P54136	DFVSEQLTSLLVNGVQLPALGENK	169	-3.14329	2.34718	-0.457607	0.177779	0.323495	0.157689	0.490267	0.231639	-0.168192	0.0551627
CADPS	Calcium-dependent secretion activator 1	Q9ULU8	AEPQELLQLDGYTVDYTDPQPGLEGGR	564	2.35114	2.34539	1.11477	0.680788	0.663913	0.393257	1.41836	1.04363	1.4762	1.13765
CEBPB	CCAAT/enhancer-binding protein beta	P17676	QLPEPLLASSGHC	333	0.411312	2.34237	-0.0260707	0.0772172	0.089253	0.252362	-0.0482802	0.194655	-0.0463079	0.140447
NSF	Vesicle-fusing ATPase	P46459	VFPPEIVEQMGCK	239	-1.01648	2.33952	0.0450364	0.0614955	-0.308916	0.346078	0.155878	0.267408	-0.113943	0.113614
FXR2	RNA-binding protein FXR2	P51116	ENISNAQALLEYHLSYLQEVEQLRLER	352	-1.97066	2.33898	-0.690757	0.476946	-0.165211	0.0732908	-0.530514	0.276132	-0.44138	0.22742
OTULIN	Ubiquitin thioesterase otulin	Q96BN8	EVPFFSVLLFAR	252	-3.45777	2.33784	-0.891342	0.425193	-0.648724	0.200099	-0.330732	0.124326	-1.9422	1.27389
PSPC1	Paraspeckle component 1	Q8WXF1	TGSETPQAPMSGVGPVSGGPGGFGR	483	-0.703378	2.33783	0.0831694	0.125552	0.200823	0.413772	-0.0155057	0.0255702	-0.153398	0.258395
SMC2	Structural maintenance of chromosomes protein 2	O95347	ELEKNMVEDSK	333	-1.36065	2.33281	0.279543	0.398877	-0.0497141	0.0669898	0.166994	0.203685	-0.0302376	0.0300841
DHX35	Probable ATP-dependent RNA helicase DHX35	Q9H5Z1	TAIECLVVVPVSQASANQR	372	-2.36048	2.33145	-0.183205	0.280006	-0.968728	1.63179	-1.03186	1.201	-1.97942	1.57053
COX4I1	Cytochrome c oxidase subunit 4 isoform 1, mitochondrial	P13073	SEDFSLPAYMDR	30	0.501576	2.32988	0.0421538	0.0672241	-0.64764	0.316197	0.336189	0.893289	0.421568	2.04136
NIPBL	Nipped-B-like protein	Q6KC79	NLYNNILSDKNSSVNLK	2214	1.58119	2.32639	-0.207063	0.0885117	-0.550961	0.415377	-0.918914	0.412045	-1.75217	0.918654
XPO1	Exportin-1	O14980	NVPAAREPEVLSTMAIIVNK	791	-1.4748	2.32543	-0.413492	0.704758	-0.327729	0.330821	-0.43556	0.99202	-0.102025	0.103412
MLF2	Myeloid leukemia factor 2	Q15773	QDYINLDESEAAAFDDEWRR	179	0.373184	2.3231	0.0499133	0.203618	0.0283128	0.06435	0.0451661	0.168188	-0.200052	0.397341
STK11IP	Serine/threonine-protein kinase 11-interacting protein	Q8N1F8	TVIQEALALDR	1078	-0.22413	2.3229	0.0217314	0.100664	-0.0350573	0.236405	-0.096234	0.699916	-0.0391763	0.168471
AR	Androgen receptor	P10275	EASGAPTSSKDNYLGGTSTISDNAK	213	-0.423657	2.32237	0.0421236	0.140353	0.133627	0.517937	0.023163	0.0527035	-0.0928516	0.182967
METTL15	12S rRNA N4-methylcytidine (m4C) methyltransferase	A6NJ78	FLLGISMTERFNLSVR	332	-1.82466	2.32208	-0.599604	0.48037	-1.01086	0.78869	-0.180216	0.0954933	0.0110275	0.005531
LARS2	Leucine--tRNA ligase, mitochondrial	Q15031	ACGKIPVPQQVAR	849	-0.391895	2.31874	-0.36329	1.73338	-0.191515	1.97011	-0.137269	0.917573	-0.256011	1.23797
LNPK	Endoplasmic reticulum junction formation protein lunapark	Q9C0E8	ILEEVMEKETYK	119	-0.701026	2.31858	0.216327	1.15254	-0.137782	0.384066	-0.00572049	0.014781	-0.18032	0.426131
SAE1	SUMO-activating enzyme subunit 1	Q9UBE0	AKLDSSETTMVK	197	-0.491735	2.31782	-0.05162	0.370576	-0.255359	0.475811	-2.94763e-05	0.000145187	-0.270586	0.46276
GDPGP1	GDP-D-glucose phosphorylase 1	Q6ZNW5	QAFDPVQFNFNK	117	-1.3642	2.31778	0.0535098	0.0954293	0.106064	0.181059	0.264681	0.620879	0.305008	0.667787
KLC1	Kinesin light chain 1	Q07866	NLGALYR	469	0.281869	2.31598	0.0688643	0.465632	0.0698599	0.275627	0.143528	0.829778	0.102143	0.675106
BCR	Breakpoint cluster region protein	P11274	AAATTSQPVLTSQQIETIFFK	529	0.966446	2.31449	0.32352	0.595538	0.418949	0.633348	0.106861	0.12729	-0.101109	0.0903612
UTP14A	U3 small nucleolar RNA-associated protein 14 homolog A	Q9BVJ6	NLPNVIINEK	663	-0.651062	2.31224	0.0164074	0.0301843	-0.981013	0.755222	-0.193353	0.403105	-1.52071	1.51522
ZNF460	Zinc finger protein 460	Q14592	HQWIHTGEKPYVCIQCGK	438	1.29507	2.31213	-1.00878	0.79298	0.782574	1.29729	0.908312	0.897739	-0.535496	0.182105
HSD17B10	3-hydroxyacyl-CoA dehydrogenase type-2	Q99714	VDVAVNCAGIAVASK	85	-0.394036	2.31128	-0.141335	0.270767	-0.168572	0.803729	-0.315223	1.75642	-0.261958	1.59925
NSF	Vesicle-fusing ATPase	P46459	WGDPVTR	510	-0.35087	2.30596	-0.0463748	0.238952	0.0148586	0.0567715	0.153757	0.735222	0.0877908	0.643219
SMCHD1	Structural maintenance of chromosomes flexible hinge domain-containing protein 1	A6NHR9	GMVFGAPVPK	1888	-0.389278	2.30543	0.040989	0.135365	-0.148418	0.281021	0.0353334	0.118082	0.309552	0.950678
ING3	Inhibitor of growth protein 3	Q9NXR8	FKMELEADNAGITEILER	104	-1.23608	2.30361	0.0697789	0.0861522	0.378477	0.501778	0.0484724	0.0562277	0.0177599	0.0150362
VPS52	Vacuolar protein sorting-associated protein 52 homolog	Q8N1B4	KPMTNYQIPQTALLK	251	-0.303501	2.30269	0.138738	0.596785	0.179928	1.00702	0.0749461	0.552794	-0.375084	0.671312
PAK1	Serine/threonine-protein kinase PAK 1	Q13153	ALYLIATNGTPELQNPEK	472	0.170379	2.30255	0.0535388	0.387302	0.107233	1.11606	0.0471334	0.353077	0.176016	2.07277
EXOC6B	Exocyst complex component 6B	Q9Y2D4	LIDTVAK	794	-0.820837	2.30152	-0.244683	0.407101	-0.122587	0.228679	0.0281223	0.048165	-0.0494483	0.0863276
PPP1R7	Protein phosphatase 1 regulatory subunit 7	Q15435	QIDATFVR	352	0.657478	2.30112	0.317293	0.369458	0.656485	2.28509	0.745982	2.49401	0.384984	0.687526
MIS18BP1	Mis18-binding protein 1	Q6P0N0	NLPMDAIFFDSIPSGTLTPVK	23	-2.51786	2.29766	-1.20978	0.876301	-0.285287	0.215516	-1.0362	1.31916	-0.308266	0.399312
SYK	Tyrosine-protein kinase SYK	P43405	QTWNLQGQALEQAIISQKPQLEK	134	1.06332	2.29702	0.361639	0.330345	-1.13735	0.752024	0.607229	0.586234	0.177582	0.156812
MTSS2	Protein MTSS 2	Q765P7	ETAEKECGALGGLFQAIVNDMK	2	1.93555	2.29129	1.11308	0.971765	0.949867	0.890788	1.34445	1.42885	1.60187	1.84193
RAVER1	Ribonucleoprotein PTB-binding 1	Q8IY67	APEEELPPLDPEEIRK	31	2.66186	2.29112	2.01136	1.59397	2.39468	2.01137	2.40505	1.82114	2.49611	2.11863
DYNC1H1	Cytoplasmic dynein 1 heavy chain 1	Q14204	VNLKYDSWHKEVLSK	1116	-0.507024	2.28867	0.168184	0.766486	0.0826235	0.26345	0.0733937	0.281757	0.0148103	0.0471968
RRP1	Ribosomal RNA processing protein 1 homolog A	P56182	SEKPPAGSICR	265	-0.868194	2.28856	-0.643891	2.02789	-0.891738	1.96257	-0.436603	1.11509	-0.0554778	0.110868
EPRS1	Bifunctional glutamate/proline--tRNA ligase	P07814	THMVVANTMEDFQK	1422	1.39811	2.28809	-0.109683	0.0695159	0.220257	0.213752	-0.230456	0.243418	0.745165	0.672442
NECAP1	Adaptin ear-binding coat-associated protein 1	Q8NC96	LDQPDWTGR	38	-2.09465	2.28649	-0.361259	0.254872	-1.0563	0.893278	-1.21183	1.46021	-1.0506	0.763845
BTAF1	TATA-binding protein-associated factor 172	O14981	IIEGLQDLDDDVR	435	0.38673	2.2847	0.356942	2.15498	0.264566	1.3977	0.0620544	0.215659	0.0215464	0.0629838
CENPF	Centromere protein F	P49454	GSPLLGPVVPGPSPIPSVTEKR	2899	0.563987	2.28384	0.214841	0.701385	0.613575	2.53995	0.362349	1.03342	0.247316	0.502997
NAA10	N-alpha-acetyltransferase 10	P41227	HVVLGAIENKVESK	170	0.154469	2.28319	0.161099	2.36393	0.216279	2.71377	0.211476	2.87572	0.198815	2.18175
PCM1	Pericentriolar material 1 protein	Q15154	MVLTLTQQNDESKEFVK	1627	-0.541174	2.28172	-0.0874098	0.394321	-0.167541	0.593128	-0.246967	0.863017	-0.158521	0.641133
DNMBP	Dynamin-binding protein	Q6XZF7	AETLEDLKFCESNIESLNMELQQLR	729	1.7777	2.28108	0.0878706	0.0532254	0.47904	0.362286	0.144623	0.0564307	0.77926	0.871425
HECTD4	Probable E3 ubiquitin-protein ligase HECTD4	Q9Y4D8	GGCCEVITEEAAAALRK	1578	0.918568	2.28059	0.301649	0.34054	-0.169318	0.130579	-0.264357	0.39286	-0.601184	0.637471
C19orf47	Uncharacterized protein C19orf47	Q8N9M1	AATESVPCSPSPLAGEIR	116	-0.736311	2.27841	-0.127364	0.500053	-0.241798	1.13585	-0.779119	1.33277	-1.84183	1.044
USF1	Upstream stimulatory factor 1	P22415	LSEELQGLDQLQLDNDVLR	261	0.720117	2.27704	0.418137	0.912292	-0.636612	0.50936	-0.922139	0.573212	0.617519	1.22381
SSH3	Protein phosphatase Slingshot homolog 3	Q8TE77	QHLHLMVQLLRPQDDIR	96	1.22792	2.27659	0.0446397	0.0371856	0.0414691	0.0356235	0.0351467	0.0282901	0.531284	0.655398
GOLGA4	Golgin subfamily A member 4	Q13439	EALQEQLDER	317	0.161093	2.2742	0.0891836	0.958591	0.0592562	0.734095	0.0311442	0.308743	0.0391289	0.361
SHANK2	SH3 and multiple ankyrin repeat domains protein 2	Q9UPX8	TCSIPIPTIIVK	1026	-0.419521	2.27374	-0.103049	0.295474	0.027788	0.0566755	0.0654327	0.220958	-0.0715279	0.25889
WAPL	Wings apart-like protein homolog	Q7Z5K2	KPNAETTVASEIK	193	-1.67383	2.27333	0.0247267	0.0165802	-0.0475417	0.0414071	0.381922	0.439142	0.163505	0.151266
PATJ	InaD-like protein	Q8NI35	SGLGLSIVGGKDTPLNAIVIHEVYEEGAAAR	1445	-2.38805	2.27164	-0.857519	2.00492	-1.11963	1.93252	-1.5376	1.18068	-1.25411	1.94395
EIF3E	Eukaryotic translation initiation factor 3 subunit E	P60228	LKETIDNNSVSSPLQSLQQR	192	-3.50972	2.26987	0.882231	0.33803	1.59166	0.845275	1.63256	0.823331	1.23814	0.422589
FXR1	RNA-binding protein FXR1	P51114	IYGESADAVKK	264	0.183347	2.2673	0.136096	1.60968	0.101055	0.805659	0.0398489	0.308252	0.0784595	0.63172
FAF1	FAS-associated factor 1	Q9UNN5	TPSGEFLER	580	1.70953	2.26489	1.35739	1.54503	0.830715	0.634006	0.386519	0.333173	0.460744	0.416325
ANP32B	Acidic leucine-rich nuclear phosphoprotein 32 family member B	Q92688	KLELSENR	68	-0.214497	2.26414	-0.149583	0.89771	-0.19288	1.5443	-0.144135	1.08802	-0.152513	1.00824
REEP5	Receptor expression-enhancing protein 5	Q00765	IIRPFFLK	140	-0.830192	2.26408	-0.0110121	0.0125718	0.0273673	0.024866	0.186872	0.265235	0.89412	2.88817
COG4	Conserved oligomeric Golgi complex subunit 4	Q9H9E3	YLQVECDRQVEK	305	-0.627784	2.25879	-0.0689758	0.11524	-0.297549	0.748178	-0.235599	0.633335	-0.237444	0.556597
CDCA2	Cell division cycle-associated protein 2	Q69YH5	DLSDAIEQTFQR	872	-1.5159	2.25586	-0.172765	0.132104	-0.786311	0.874242	-0.110116	0.0407983	0.0309911	0.0199475
SCPEP1	Retinoid-inducible serine carboxypeptidase	Q9HB40	DLAMVASDMMVLLK	134	-2.22195	2.25431	-0.731462	0.555325	-0.213448	0.241562	-0.222153	0.186854	-0.62954	0.756154
ANKRD28	Serine/threonine-protein phosphatase 6 regulatory ankyrin repeat subunit A	O15084	TPLDLAAFK	585	-0.507696	2.25391	-0.241153	1.82418	-0.292524	1.9446	-0.14608	0.730688	-0.120259	0.590701
PI4KA	Phosphatidylinositol 4-kinase alpha	P42356	HAQFLLVNFNHIHKR	967	1.35785	2.24622	0.596029	0.692454	1.40709	1.45132	0.859753	0.708856	1.72187	2.139
HIRA	Protein HIRA	P54198	GLTWDPVGKYIASQADDR	179	2.35756	2.2428	1.15531	1.10147	0.172709	0.132203	-0.248745	0.227014	0.320815	0.269939
TATDN2	Putative deoxyribonuclease TATDN2	Q93075	NNSSSSFSPHFLGPGVGGAASK	78	-2.18565	2.24146	-0.855312	0.654852	-0.414298	0.335252	-0.997869	0.693947	0.259702	0.257016
ISYNA1	Inositol-3-phosphate synthase 1	Q9NPH2	VGPVAATYPMLNK	518	-0.79279	2.23905	-0.228877	0.273238	-0.446698	0.688524	-0.668766	0.80701	-0.424528	0.614023
SYNE2	Nesprin-2	Q8WXH0	SYQNEIKR	4637	-1.14996	2.23883	-0.66504	0.686703	-0.123175	0.169445	0.00828048	0.0107718	0.299255	0.520336
GTF2I	General transcription factor II-I	P78347	MVVTFLMSALESMCK	21	-1.91364	2.2388	-1.23701	0.913453	-0.148435	0.075924	-0.253326	0.162377	-1.84101	2.04913
NAT10	RNA cytidine acetyltransferase	Q9H0A0	IVSGCPLPEACELYYVNRDTLFCYHK	495	0.493555	2.23864	0.119775	0.18374	0.41955	1.95232	0.373659	1.38708	0.321103	1.20596
NOC4L	Nucleolar complex protein 4 homolog	Q9BVI4	RAELWDTWK	233	0.548794	2.23654	-0.323175	0.413043	0.493094	1.38905	0.574605	1.51197	-0.32649	0.217083
GOLGB1	Golgin subfamily B member 1	Q14789	FSDAIQSKEEEIR	2215	0.569778	2.23641	0.183787	0.487425	0.25449	0.689759	0.00698414	0.0123331	0.0162387	0.0279379
COPA	Coatomer subunit alpha	P53621	HAIVICNR	509	-2.0608	2.2352	-0.199047	0.16168	0.0932078	0.0434079	0.0605018	0.0352072	0.341169	0.365553
HSPA4	Heat shock 70 kDa protein 4	P34932	QIQQYMK	705	0.325567	2.23489	0.0678353	0.211431	0.0561957	0.181741	0.237645	1.15977	0.241996	1.43309
NAT10	RNA cytidine acetyltransferase	Q9H0A0	ARPSVLWCYKK	51	1.10679	2.23384	0.646171	0.986671	0.576525	0.639579	0.621975	0.854993	-0.0861613	0.0482289
S100A14	Protein S100-A14	Q9HCY8	DLVTQQLPHLMPSNCGLEEK	48	-0.349121	2.23245	0.0595736	0.353778	0.0724183	0.387815	0.0573885	0.323295	0.05224	0.24229
PRKDC	DNA-dependent protein kinase catalytic subunit	P78527	ICSKPVVLPK	490	-0.678055	2.23093	-0.0368163	0.0798047	0.215331	0.606853	0.22193	0.599823	1.17576	5.13425
AHNAK	Neuroblast differentiation-associated protein AHNAK	Q09666	GDLDASVPSMK	5313	0.26324	2.23072	-0.0122841	0.0502841	-0.107307	0.7122	0.325778	2.50716	0.0441105	0.115004
POLR1C	DNA-directed RNA polymerases I and III subunit RPAC1	O15160	ILLAEVPTMAVEK	79	-0.291041	2.22755	-0.0225289	0.0880927	0.0100451	0.0364305	-0.101757	0.358527	0.0935552	0.491879
TMX2	Thioredoxin-related transmembrane protein 2	Q9Y320	EFNLNELYQR	254	-0.290247	2.22727	-0.083541	0.577069	-0.127829	1.13351	-0.210938	1.15967	-0.144968	0.839195
PLEC	Plectin	Q15149	CISELKDIR	1122	0.404209	2.22635	0.286083	1.72156	0.191899	0.633256	0.327913	1.88925	0.313029	1.39613
CHEK2	Serine/threonine-protein kinase Chk2	O96017	RPLNNNSEIALSLSR	181	-1.5552	2.22188	0.117879	0.134934	-0.0244173	0.0336343	-0.499541	0.426083	-1.32299	1.66859
SEC24B	Protein transport protein Sec24B	O95487	TPPTANHPVEPVTSVTQPSELLQQK	329	0.488533	2.21805	0.141016	0.236477	0.212711	0.535189	-0.427849	0.650022	-0.273663	0.827378
BCAS4	Breast carcinoma-amplified sequence 4	Q8TDM0	WLGSAGLPSFR	152	-0.349273	2.21686	0.122321	0.528069	-0.0431033	0.128391	0.172738	0.741216	0.0143813	0.0237761
NEK9	Serine/threonine-protein kinase Nek9	Q8TD19	TEDDSLVVWKEVDLTR	72	2.44668	2.21573	0.332257	0.147689	1.13612	0.670278	0.669959	0.327501	-0.0920967	0.0390584
BICD2	Protein bicaudal D homolog 2	Q8TD16	VMLDYYR	552	-0.540036	2.21572	-0.443883	1.13286	-0.44662	2.58355	-0.265228	1.48253	-0.312876	1.22064
SCAMP1	Secretory carrier-associated membrane protein 1	O15126	EREMQNLSQHGR	105	0.683665	2.21396	-0.0830487	0.0444907	0.76427	1.08802	0.450685	0.430006	-1.32731	1.15106
MYH10	Myosin-10	P35580	QKLNLSSR	1330	1.6105	2.21187	-0.960731	0.995971	-1.58182	0.777233	-0.571453	0.533157	-0.278388	0.24178
TTC33	Tetratricopeptide repeat protein 33	Q6PID6	VTSQQFEAEAADEKDVVDNDEGNWLHAIK	17	-3.54552	2.21178	-1.30715	0.813457	-1.40537	0.845094	-2.72695	2.04374	-2.58169	1.27335
OSBPL9	Oxysterol-binding protein-related protein 9	Q96SU4	VVLPTFILERR	391	-0.264515	2.21078	-0.0630552	0.349118	-0.0398183	0.249164	-0.0114979	0.0648373	0.269657	2.17099
MAP2K4	Dual specificity mitogen-activated protein kinase kinase 4	P45985	EQKQLLMDLDVVMR	141	1.54542	2.21056	1.0479	1.2116	1.84986	2.46582	1.73415	2.16614	0.404623	0.264735
ZZEF1	Zinc finger ZZ-type and EF-hand domain-containing protein 1	O43149	LDVETWQQEQPVVLHTWTK	1079	-0.795193	2.2088	-2.84092	1.23417	-3.48561	1.72323	-3.80225	1.94713	-4.39035	2.51689
USP40	Ubiquitin carboxyl-terminal hydrolase 40	Q9NVE5	LLCPVPDSYTLK	808	1.78156	2.2079	1.47028	1.097	1.44458	0.968596	1.49717	0.942226	1.73375	1.52033
CDK13	Cyclin-dependent kinase 13	Q14004	TENQHVPTTSSSLTDPHAGVK	1279	-1.2244	2.20766	0.147342	0.137003	-0.30862	0.402876	-0.327595	0.429923	-0.340218	0.396536
WASL	Actin nucleation-promoting factor WASL	O00401	GYFHTFAGDTCQVALNFANEEEAK	105	0.47143	2.20707	-0.118162	0.211248	-0.32775	0.688986	-0.238209	0.55746	-0.404653	0.905626
GCN1	Stalled ribosome sensor GCN1	Q92616	KCMLDAALATLNTHGK	1274	-1.36448	2.20705	-0.0881325	0.0985378	0.525173	0.868893	0.461807	0.718184	0.298649	0.366813
ATG4B	Cysteine protease ATG4B	Q9Y4P1	SIGQWYGPNTVAQVLK	138	1.59019	2.20666	0.332029	0.302866	0.351575	0.269708	0.277873	0.206788	0.680493	0.518076
KMT2C	Histone-lysine N-methyltransferase 2C	Q8NEZ4	QLPGSAIWSIK	873	0.46315	2.20531	-0.0668173	0.137689	-0.0142631	0.0282478	-0.340623	0.715857	-0.047454	0.103168
IQGAP1	Ras GTPase-activating-like protein IQGAP1	P46940	QIPAITCIQSQWR	775	0.311217	2.20493	0.0160936	0.0489281	-0.101958	0.320507	0.0792472	0.51074	-0.127972	0.285716
SBF1	Myotubularin-related protein 5	O95248	CLAQELHLHVQQNR	601	1.19202	2.2017	-0.0497858	0.0364562	0.92429	0.965244	0.54888	0.501947	0.0978355	0.0725458
MAPKAP1	Target of rapamycin complex 2 subunit MAPKAP1	Q9BPZ7	TSFSFQK	509	-1.09539	2.19921	-0.194276	0.378977	-0.485043	1.65583	-0.669402	0.625485	-1.1287	1.23286
MRPS22	Small ribosomal subunit protein mS22	P82650	TYEDIDKR	249	-0.466811	2.19779	-0.412323	1.19574	-0.356755	0.962764	-0.485192	1.37934	-0.140309	0.378261
NARF	Nuclear prelamin A recognition factor	Q9UHQ1	DAAVDTLFGDLKEDK	272	-0.602484	2.19544	-0.508897	1.46532	-0.542831	1.21975	-0.169717	0.581046	-0.457589	0.741081
DHTKD1	2-oxoadipate dehydrogenase complex component E1	Q96HY7	LMLESQEFDHFLATK	169	-0.621557	2.19496	-0.297099	0.681677	-0.140859	0.270912	0.00737404	0.0161449	-0.147294	0.335977
NHERF2	Na(+)/H(+) exchange regulatory cofactor NHE-RF2	Q15599	SVDPGSPAAR	178	-0.802492	2.19441	-0.208979	1.2736	-0.200514	1.07166	-0.0704746	0.252845	-0.258998	0.957102
CTNNB1	Catenin beta-1	P35222	HAVVNLINYQDDAELATR	134	-0.29615	2.1939	-0.0149384	0.0606198	-0.0487886	0.178104	-0.143837	0.611965	-0.077653	0.230331
MYOF	Myoferlin	Q9NZM1	SRSLSQIHEAAVR	727	-2.43081	2.19336	-0.243401	0.103511	0.386514	0.215397	-0.083619	0.0323093	0.602888	0.360005
GANAB	Neutral alpha-glucosidase AB	Q14697	GLLEFEHQRAPR	174	-1.004	2.18963	-1.75033	1.82202	-0.568629	0.956389	-0.54066	0.489425	-0.502392	0.72586
SYTL1	Synaptotagmin-like protein 1	Q8IYJ3	QACAELSLWDHGALANR	489	1.49919	2.18958	-0.618612	0.55815	-0.00631522	0.00409212	-0.609669	0.453317	0.260442	0.179939
SLFN5	Schlafen family member 5	Q08AF3	NIVFGINPGVAPPAGAYNLLLCLASR	854	-2.63522	2.18891	-2.2585	1.35993	-1.15988	0.736845	-0.529859	0.308966	-1.46995	0.89511
FAIM	Fas apoptotic inhibitory molecule 1	Q9NVQ4	VVYVDGKEEIR	31	-0.420784	2.18703	-0.353435	1.43234	-0.311812	1.59305	-0.290573	1.31292	-0.395018	1.94791
MAD1L1	Mitotic spindle assembly checkpoint protein MAD1	Q9Y6D9	QVESAELK	607	1.2751	2.18649	0.794769	0.997388	0.783819	1.22648	1.14316	2.01807	1.00392	1.69118
DCAF5	DDB1- and CUL4-associated factor 5	Q96JK2	SGYTDSESSASLPR	454	-1.25996	2.18113	-0.657213	0.747468	-0.594288	0.869297	-0.120727	0.188816	-0.419002	0.78726
ITPK1	Inositol-tetrakisphosphate 1-kinase	Q13572	GMEVVQLNLSRPIEEQGPLDVIIHK	35	-1.12182	2.17889	-0.165957	0.178771	-0.171171	0.153087	0.0118787	0.00797108	-0.426649	0.313146
USO1	General vesicular transport factor p115	O60763	VLVSPTNPPGATSSCQK	289	-0.656771	2.17888	-0.108659	0.3179	-0.0141941	0.0498457	-0.144049	0.295348	0.0193287	0.0411785
KMT2B	Histone-lysine N-methyltransferase 2B	Q9UMN6	FLTGLEPDAINVLIGSIR	1719	-1.52719	2.1788	-0.0827258	0.0876715	-0.235018	0.280518	-0.248537	0.233686	0.159933	0.150642
SPECC1	Cytospin-B	Q5M775	TSPTPPESATTVK	809	1.96554	2.17613	1.67314	1.7845	0.804061	0.38813	1.57204	1.65182	1.29791	1.21811
CDC5L	Cell division cycle 5-like protein	Q99459	DLPRPSEVNETILRPLNVEPPLTDLQK	544	-1.09548	2.17602	-0.45788	0.556602	-0.582616	0.42886	-0.13399	0.190148	-0.745918	0.392257
PITRM1	Presequence protease, mitochondrial	Q5JRX3	LGDKIHGFTVNQVTSVPELFLTAVK	42	0.96607	2.17548	0.272572	0.357675	-0.860719	0.601253	-0.300258	0.313678	0.146526	0.171145
R3HDM2	R3H domain-containing protein 2	Q9Y2K5	SASTDLGTADVVLGR	853	-0.681612	2.17389	-1.45138	1.00542	-0.327799	0.595281	-0.259389	0.472064	-0.169779	0.263476
PDCD7	Programmed cell death protein 7	Q8N8D1	DRQWLEAVFGTPR	143	0.931894	2.17275	0.252319	0.241311	0.0142178	0.0142219	-0.612402	0.780405	0.503908	1.01713
ZNF618	Zinc finger protein 618	Q5T7W0	VKTELPDDYIQEVIWQGEAK	62	0.817337	2.17208	0.400448	0.828932	0.851805	2.3531	0.375316	0.929649	0.448414	0.991376
PCYT1A	Choline-phosphate cytidylyltransferase A	P49585	MLQAISPK	310	-0.557335	2.16697	-0.963023	1.04445	-0.0815945	0.118615	-0.265541	0.903553	0.17855	0.471577
TRIP11	Thyroid receptor-interacting protein 11	Q15643	FLETESHPSIPPPK	1867	1.21581	2.16582	0.712635	0.671349	0.699093	0.976875	0.536344	0.605882	0.277068	0.230024
ANXA7	Annexin A7	P20073	TLGTMIAGDTSGDYRR	465	-0.453871	2.16555	-0.267488	0.923202	-0.165945	0.539296	-0.164254	0.420712	0.150734	0.438029
ZFTRAF1	Zinc finger TRAF-type-containing protein 1	P0DTL6	AAEAAEAAAAAAAAGSGK	83	0.605482	2.16514	0.089167	0.161715	-0.0565522	0.0864826	-0.0776176	0.0962011	-0.197385	0.190757
UBR4	E3 ubiquitin-protein ligase UBR4	Q5T4S7	ALSVLGCGHTSSTK	3858	2.35592	2.16198	0.738653	0.855398	1.29605	2.05265	0.66157	0.58716	1.29891	1.83673
EIF3M	Eukaryotic translation initiation factor 3 subunit M	Q7L2H7	QQWQQLYDTLNAWK	345	0.507852	2.16071	-0.168396	0.63111	0.0988992	0.225055	0.0531684	0.0714303	-0.187071	0.24124
HNRNPF	Heterogeneous nuclear ribonucleoprotein F	P52597	GLPFGCTKEEIVQFFSGLEIVPNGITLPVDPEGK	117	-3.17198	2.16029	-1.04494	0.640294	-1.2278	0.788492	-1.18577	0.510407	-1.47494	1.10478
NT5C3A	Cytosolic 5'-nucleotidase 3A	Q9H0P0	EIVAESDVMLK	172	2.36654	2.15964	1.01229	1.63262	0.863785	0.982278	0.865907	1.2031	1.40415	2.23002
POLR2B	DNA-directed RNA polymerase II subunit RPB2	P30876	AYFLGYMVHR	362	-0.71039	2.15867	-0.0472451	0.0967618	-0.254821	0.596446	-0.210106	0.354347	-0.624484	2.13786
ZFP91	E3 ubiquitin-protein ligase ZFP91	Q96JP5	RSSPSARPPDVPGQQPQAAK	81	-1.58562	2.15833	-0.31131	0.318998	-0.726812	1.00709	-0.422299	0.45961	-0.635125	0.668799
PRDX6	Peroxiredoxin-6	P30041	LIALSIDSVEDHLAWSK	68	0.547205	2.1581	0.215007	0.624389	0.32176	1.02	0.131591	0.398231	0.322906	0.664731
TRIM25	E3 ubiquitin/ISG15 ligase TRIM25	Q14258	NTVLCNVVEQFLQADLAR	66	2.43865	2.15344	1.34175	0.880508	1.85832	1.51373	0.442759	0.246561	0.832458	0.426158
ASMTL	Probable bifunctional dTTP/UTP pyrophosphatase/methyltransferase protein	O95671	FSSACDVGGCTGALAR	452	-0.631602	2.15065	-0.12063	0.601405	-0.526325	0.541985	-0.124539	0.703986	0.0837994	0.322618
SUPT5H	Transcription elongation factor SPT5	O00267	GYIGVVKDATESTAR	719	-0.946987	2.14823	-0.00828529	0.0145285	0.11187	0.190521	0.252059	0.776183	0.0671845	0.131257
RAD50	DNA repair protein RAD50	Q92878	QKGYEEEIIHFK	1078	-0.965996	2.14757	-0.861568	1.13436	-0.867711	1.34111	-0.309084	0.49466	-1.01534	2.37595
DYNC1H1	Cytoplasmic dynein 1 heavy chain 1	Q14204	VAAPDVVVPTLDTVR	2562	-0.363136	2.14691	-0.0492899	0.162954	0.120389	0.474383	0.025286	0.063965	0.157856	0.81368
AFF1	AF4/FMR2 family member 1	P51825	QKAELMTDR	976	-2.24666	2.14655	-1.61693	3.04052	-1.03181	1.42864	-0.966399	1.3993	-0.831252	1.13034
GIGYF1	GRB10-interacting GYF protein 1	O75420	SGGGSSGLGLWEDTPK	831	-0.428039	2.1444	-0.775743	2.5781	-0.411691	0.881116	-0.170583	0.508363	-0.962064	1.64264
TPM3	Tropomyosin alpha-3 chain	P06753	DEEKMELQEIQLK	138	-1.01043	2.14378	0.261526	0.443273	0.104074	0.121836	0.0309184	0.0427938	0.142728	0.17452
PITRM1	Presequence protease, mitochondrial	Q5JRX3	RPVRPHTVEKPVPSSSGGDAHVPHGSQVIR	811	-1.46122	2.14255	0.544089	0.291319	1.19154	0.971333	1.03072	0.840482	0.94663	0.483512
SIRT1	NAD-dependent protein deacetylase sirtuin-1	Q96EB6	NYTQNIDTLEQVAGIQR	342	0.286926	2.14195	0.104324	0.637901	-0.0270099	0.127462	0.0427971	0.23698	-0.053823	0.250273
NUP153	Nuclear pore complex protein Nup153	P49790	CQPVFSFGNSEQTK	1129	1.08112	2.14135	0.229665	0.235117	0.252461	0.301803	0.51282	0.708754	0.0395026	0.0259944
LDHA	L-lactate dehydrogenase A chain	P00338	TLHPDLGTDKDKEQWK	213	-0.703156	2.14002	0.238933	0.816319	0.124727	0.339554	0.362271	1.47848	0.637462	2.91619
NUP133	Nuclear pore complex protein Nup133	Q8WUM0	IHQHILPQGQGMLSGIGR	240	-1.67905	2.13961	-1.93227	1.67004	-0.887454	0.502552	-1.41955	1.08259	-1.9508	2.37656
PLEC	Plectin	Q15149	RLTVNEAVKEGVVGPELHHK	2884	-0.785782	2.13887	-0.142493	0.323821	-0.146681	0.197758	-0.345883	1.22605	-0.192673	0.430564
SPTBN1	Spectrin beta chain, non-erythrocytic 1	Q01082	FATDGEGYKPCDPQVIR	594	-0.68367	2.13737	-0.382025	1.05069	-0.198595	0.494078	-0.145083	0.505079	0.0341052	0.0656396
PLEC	Plectin	Q15149	VSIYEAMRR	3506	-1.31959	2.13663	0.0851119	0.0698966	0.39818	0.598229	0.634322	0.790935	0.344243	0.422583
THOC2	THO complex subunit 2	Q8NI27	DALLDHDLALPLCLLMAQQR	731	-0.322609	2.13619	-0.0345285	0.172255	-0.18171	1.04597	-0.200896	1.18641	-0.211611	1.14391
TACC3	Transforming acidic coiled-coil-containing protein 3	Q9Y6A5	ILSPSMASK	69	-0.820502	2.13397	-0.751325	1.2045	-0.865535	2.08445	-0.665944	1.17755	-1.1044	1.91797
BRIP1	Fanconi anemia group J protein	Q9BX63	LNSPLEK	195	1.23095	2.13394	0.332027	0.26751	0.0157997	0.00799336	1.13224	1.17059	1.32799	1.7523
PKN1	Serine/threonine-protein kinase N1	Q16512	SSLKAEAENTSEVSTVLK	379	1.23189	2.13219	-0.21076	0.257141	0.449792	0.552	0.307128	0.362726	0.506956	0.599462
NUP188	Nucleoporin NUP188	Q5SRE5	TLQCLNAVR	1430	-0.250137	2.13145	-0.743207	3.14	-0.118712	0.286392	-0.497516	1.32872	-0.0744748	0.194034
UPF1	Regulator of nonsense transcripts 1	Q92900	YGVIIVGNPK	879	-0.501733	2.13074	-0.0108471	0.0318078	-0.152531	0.45391	-0.0599777	0.179556	-0.103497	0.290668
DYNC1H1	Cytoplasmic dynein 1 heavy chain 1	Q14204	ETVDQVEELRR	3210	0.705239	2.12704	-0.0912669	0.135843	-0.172658	0.32881	-0.107037	0.11826	0.0252752	0.0330378
BCLAF1	Bcl-2-associated transcription factor 1	Q9NYF8	GRAEGEWEDQEALDYFSDKESGK	369	-0.830633	2.12625	-0.135679	0.253379	-0.145381	0.182984	0.0488018	0.0861783	-0.314131	0.454057
USP10	Ubiquitin carboxyl-terminal hydrolase 10	Q14694	LPPVLVLHLKR	678	-0.440207	2.12464	0.0341296	0.0658851	0.157223	0.638427	0.101551	0.305012	0.339465	1.40107
PES1	Pescadillo homolog	O00541	VMAGTLKLEDK	511	-0.909294	2.12329	-0.558385	0.852886	-0.535131	0.725963	-0.353133	0.536861	-0.45256	0.531003
PHF12	PHD finger protein 12	Q96QT6	TTSPSSDTDLLDR	129	-1.51948	2.1232	-0.370279	0.899177	-0.0774851	0.153361	-0.503505	0.975053	-0.995947	0.94275
NFRKB	Nuclear factor related to kappa-B-binding protein	Q6P4R8	MHGFESVVGPVK	540	-0.590434	2.12223	-0.341267	0.801747	-0.0914596	0.21096	-0.364858	0.935416	0.157993	0.356461
RAD50	DNA repair protein RAD50	Q92878	TANQLMNDFAEK	410	-1.00763	2.12208	-0.080937	0.127468	0.0464603	0.0669425	0.260839	0.77399	-0.273746	0.343282
ATRIP	ATR-interacting protein	Q8WXE1	EAQNLAFTGLNLVAR	377	0.330817	2.12202	0.0541436	0.141393	0.152881	0.71061	-0.11616	0.387028	-0.0908445	0.20871
KIN	DNA/RNA-binding protein KIN17	O60870	GNEGTLESINEK	352	-0.605469	2.12041	-0.355505	0.76932	-1.02855	0.882554	-0.102544	0.2656	-0.819473	1.05409
MED30	Mediator of RNA polymerase II transcription subunit 30	Q96HR3	STPPLAASGMAPGPFAGPQAQQAAR	2	-2.10629	2.11854	-0.302523	0.454734	-0.0103883	0.0173913	-0.412032	0.601149	-0.597139	0.426444
TMCC3	Transmembrane and coiled-coil domain protein 3	Q9ULS5	VTEQIKIEQTSR	78	0.762316	2.11796	0.322818	0.399148	0.55916	1.17799	0.427186	0.845793	0.762512	1.55698
AHNAK	Neuroblast differentiation-associated protein AHNAK	Q09666	TITVTRR	150	0.96419	2.11756	0.438674	0.596886	1.29148	1.31907	-0.296972	0.461215	1.4793	1.22457
CLIC1	Chloride intracellular channel protein 1	O00299	FLDGNELTLADCNLLPK	167	0.419305	2.11722	0.220753	0.695449	0.129868	0.287677	-0.173429	0.381777	-0.256731	0.933103
PPARD	Peroxisome proliferator-activated receptor delta	Q03181	CQCTTVETVR	249	-1.98299	2.11626	0.113694	0.184497	-0.830023	1.10498	-0.680246	1.56715	-0.568155	0.80183
RBM15	RNA-binding protein 15	Q96T37	LWVGGLGPWVPLAALAR	457	-2.75809	2.11369	-1.26022	0.650856	0.109478	0.0425426	-0.202159	0.101708	-1.8262	1.27411
ZFHX4	Zinc finger homeobox protein 4	Q86UP3	CEVCDYETNVAR	769	0.579872	2.11361	0.352881	0.952869	0.476645	1.63026	0.6155	2.29935	0.183726	0.421402
YKT6	Synaptobrevin homolog YKT6	O15498	VAFTLLEK	89	-0.309319	2.11292	-0.0177261	0.0509733	-0.444186	0.386079	-0.118919	0.754509	0.224971	1.42843
HEATR5B	HEAT repeat-containing protein 5B	Q9P2D3	MELAHSLLLNEEALAQITEAK	1	-2.44269	2.10727	-1.63028	0.829612	0.305137	0.20575	0.644123	0.569917	-0.345846	0.20332
HOOK1	Protein Hook homolog 1	Q9UJC3	SLQEQGSKSEGESSSK	530	-1.05505	2.10723	-0.72754	0.620624	-1.37192	2.52177	-0.483798	0.738941	-0.525117	0.563487
TRIP12	E3 ubiquitin-protein ligase TRIP12	Q14669	TLFGVLYEVYSSSAGPAVR	837	1.28744	2.10679	0.0331348	0.0185559	0.316	0.174006	1.53921	2.39184	-0.726273	0.379907
SLC1A5	Neutral amino acid transporter B(0)	Q15758	HYRGPAGDATVASEKESVM	523	1.49497	2.10594	1.309	1.88905	1.43304	2.1694	0.565182	0.375348	1.066	1.45874
POLE	DNA polymerase epsilon catalytic subunit A	Q07864	EVSSFLSK	115	-1.75862	2.10488	-1.17708	0.728608	-1.59247	0.750067	-1.63437	1.09963	-1.10693	0.614692
FAM98B	Protein FAM98B	Q52LJ0	SLCNLEESITSAGR	61	-1.00223	2.10399	-1.36638	1.24002	0.0599103	0.0786375	-0.606133	0.569799	-1.11328	0.731478
ATXN2L	Ataxin-2-like protein	Q8WWM7	RGAEGILAPQPPPPQQHQERPGAAAIGSAR	71	-2.26889	2.10283	-0.167537	0.246926	-0.0729744	0.132749	0.147656	0.524788	0.0839174	0.286262
MARK2	Serine/threonine-protein kinase MARK2	Q7KZI7	VLDANSCQSELHEK	717	-2.54841	2.10276	-0.616715	0.922026	-0.69623	1.21005	-0.373383	0.851841	-0.846081	1.91404
ZNFX1	NFX1-type zinc finger-containing protein 1	Q9P2E3	ELAIIQGPPGTGK	613	0.965285	2.1012	0.608161	0.991648	0.293432	0.323467	0.387887	0.4426	0.0588363	0.0586544
GAK	Cyclin-G-associated kinase	O14976	AVLAVHPDKAAGQPYEQHAK	1270	-0.714093	2.10113	-0.0530845	0.100055	-0.0870773	0.1537	-0.330736	0.971731	-0.246123	0.327426
RANBP10	Ran-binding protein 10	Q6VN20	VQGTVHCFPISAR	237	-2.69299	2.10095	-0.34894	0.120493	-0.882726	0.18557	-0.31087	0.120449	0.382086	0.185399
DNM1L	Dynamin-1-like protein	O00429	AVMHFLVNHVKDTLQSELVGQLYK	669	1.72885	2.10034	0.167091	0.1813	0.219066	0.249083	-0.23838	0.352241	0.43841	0.582709
COG1	Conserved oligomeric Golgi complex subunit 1	Q8WTW3	GTGVLQEEMK	307	-0.392817	2.09875	-0.000291875	0.00101143	-0.368344	1.11291	0.102074	0.36439	0.126802	0.500225
COPS2	COP9 signalosome complex subunit 2	P61201	IDQVNQLLELDHQK	402	0.737975	2.0981	0.59581	1.18235	1.07017	0.691394	0.316214	0.485294	0.472859	0.447323
UQCRC1	Cytochrome b-c1 complex subunit 1, mitochondrial	P31930	ADLTEYLSTHYK	214	1.66548	2.09788	1.13793	1.36503	1.69467	2.66256	0.644622	1.04625	1.86418	4.06089
CASP6	Caspase-6	P55212	GHPAGGEENMTETDAFYK	10	-0.687038	2.09759	0.148817	0.433858	-0.0314341	0.0544064	0.0115403	0.0267718	0.151784	0.339663
CASK	Peripheral plasma membrane protein CASK	O14936	AKEVLEEISCYPENNDAK	409	-1.94815	2.09706	-0.567462	0.568855	0.126466	0.0729778	-0.687024	0.328561	0.257103	0.242621
N4BP1	NEDD4-binding protein 1	O75113	VPLFPENGLHQQPEPLLPNNMK	518	1.06408	2.09695	0.128266	0.0703049	-1.75327	0.938713	-0.662882	0.300495	-1.37573	0.643826
RTN3	Reticulon-3	O95197	AAFDKEFK	255	-4.23036	2.09629	-2.6339	0.920243	-3.34477	1.3851	-0.579288	0.137265	-3.7991	1.71568
EIF4A1	Eukaryotic initiation factor 4A-I	P60842	TATFAISILQQIELDLK	83	-2.59954	2.09536	-1.15792	0.428239	-0.484245	0.323096	-1.42856	0.546191	0.613142	0.413426
C11orf98	Uncharacterized protein C11orf98	E9PRG8	KLLQQIR	71	0.300704	2.09372	0.0839921	0.580056	0.182769	1.41372	-0.056341	0.148439	0.129023	0.728096
VPS13B	Intermembrane lipid transfer protein VPS13B	Q7Z7G8	LGISLLGAIAGIVDQPMQNFQK	3758	1.42622	2.09254	0.636761	0.712963	0.693963	0.622181	0.4456	0.417588	1.52612	2.34809
DCXR	L-xylulose reductase	Q7Z4W1	MELFLAGR	1	-1.39579	2.09196	-0.205769	0.0952432	0.637795	0.964912	-0.50082	0.246571	0.533441	0.710223
CTBP2	C-terminal-binding protein 2	P56545	GETLGLIGFGR	180	-1.72569	2.09162	-0.0210572	0.0431776	-0.521317	0.80304	-0.901193	1.04458	0.257889	0.616845
CWF19L2	CWF19-like protein 2	Q2TBE0	YGSMEIFQSKLEDAEK	259	-1.69139	2.08921	-1.09874	1.29687	-1.606	1.04358	-0.905769	1.31192	-0.9411	0.963552
EHD1	EH domain-containing protein 1	Q9H4M9	EMPNVFGKESK	317	-0.628133	2.089	0.0231418	0.0618914	-0.608031	0.949326	-0.00941313	0.0211238	-0.140858	0.390333
MRPL34	Large ribosomal subunit protein bL34m	Q9BQ48	LSTPAGVQVILRR	70	-0.481359	2.08899	-0.272619	0.879592	-0.103468	0.374534	-0.00264477	0.0074348	-0.114814	0.375252
MRGBP	MRG/MORF4L-binding protein	Q9NV56	NFVLPEEIIQEVR	104	-0.460669	2.08804	-0.350416	1.00358	-0.385475	0.943687	-1.06308	1.18135	0.076626	0.0842657
RRM1	Ribonucleoside-diphosphate reductase large subunit	P23921	VYNNTAR	278	-2.02721	2.08777	-1.04867	1.53856	-1.35976	0.972648	-0.333128	0.425866	-0.577782	0.785654
FLVCR1	Heme transporter FLVCR1	Q9Y5Y0	AGTFPVNGAPR	44	-1.87867	2.08708	-0.649895	0.312901	-0.898605	0.555902	-0.933808	0.500759	-0.29199	0.436257
ECPAS	Proteasome adapter and scaffold protein ECM29	Q5VYK3	IKPLGPMLLNGLTK	391	-0.383671	2.08662	0.151898	0.797186	0.159049	0.706144	0.271521	1.41183	0.28194	0.865085
SSH3	Protein phosphatase Slingshot homolog 3	Q8TE77	VGGVSPEEHPAPEVSTPFPPLPPEPEGGGEEK	480	-1.6678	2.08571	-0.768334	1.77532	-0.951594	1.08346	-1.55319	2.42716	-1.67506	3.66573
PRRC2B	Protein PRRC2B	Q5JSZ5	GVLDLSYGPGPSLRPQNVTSWR	189	0.27798	2.08567	0.0434294	0.184723	0.0482416	0.236199	0.0673993	0.326587	-0.137253	0.406016
PHKA1	Phosphorylase b kinase regulatory subunit alpha, skeletal muscle isoform	P46020	YISGILR	828	0.837874	2.08523	0.613143	1.19827	0.00479411	0.00583738	-0.152604	0.203247	0.310356	0.552406
AP1M2	AP-1 complex subunit mu-2	Q9Y6Q5	LKVFLSGMPELR	200	-0.605457	2.08332	-0.314866	0.957588	-0.03422	0.057242	-0.041156	0.0863991	-0.436175	1.07925
IQGAP2	Ras GTPase-activating-like protein IQGAP2	Q13576	LREEVVTK	807	-0.500455	2.08332	-0.124581	0.618251	-0.0459489	0.126321	-0.141239	0.400797	0.220524	1.16945
OSBPL9	Oxysterol-binding protein-related protein 9	Q96SU4	LTEADAYLQILIEQLK	123	1.68587	2.0824	-0.37477	0.1174	0.565904	0.420461	1.00991	1.14906	0.217144	0.118961
TRIO	Triple functional domain protein	O75962	SLQLDIIPASIPGSEVK	1258	0.4196	2.08198	0.0599187	0.201442	0.298292	1.43168	0.0211955	0.0330545	0.0777822	0.225169
BAG6	Large proline-rich protein BAG6	P46379	VKPQPPLSDAYLSGMPAK	1032	-3.26719	2.08152	-0.0735459	0.0916558	-1.08717	0.541891	-0.478004	0.584647	-0.986246	0.618854
SETD1B	Histone-lysine N-methyltransferase SETD1B	Q9UPS6	VVGIWTK	73	-3.612	2.08028	0.508435	0.390536	-0.867674	0.451781	-0.17847	0.073097	-2.18326	1.05175
MTHFSD	Methenyltetrahydrofolate synthase domain-containing protein	Q2M296	TLLVPTPR	83	0.967315	2.07947	0.755372	1.31241	0.822463	1.71033	0.836428	1.56613	0.206009	0.146762
AP1G2	AP-1 complex subunit gamma-like 2	O75843	WHIDTILHVLTTAGTHVR	418	0.928082	2.07719	0.469675	0.928489	0.334407	0.594248	0.311675	0.410266	0.828667	1.52225
MAT1A	S-adenosylmethionine synthase isoform type-1	Q00266	YLDEDTVYHLQPSGR	235	0.788076	2.07686	0.127007	0.153628	0.164347	0.231946	-0.0517196	0.0339479	0.156368	0.220824
ILF3	Interleukin enhancer-binding factor 3	Q12906	NTKEPPLSLTIHLTSPVVR	159	3.93175	2.07685	1.02414	0.259547	0.0228377	0.00498691	-0.40747	0.0911802	-0.304953	0.0927711
NUP98	Nuclear pore complex protein Nup98-Nup96	P52948	LLAPHIGRLPMPEDYAMDELR	1782	-0.360655	2.07669	0.0640558	0.0817166	0.199322	0.404889	0.257612	0.792087	0.110194	0.330637
DNAJC13	DnaJ homolog subfamily C member 13	O75165	DSLLASLLDGVR	312	1.5675	2.07657	1.18459	1.18086	0.856783	0.877468	0.89153	0.938893	0.676105	0.458613
BET1L	BET1-like protein	Q9NYM9	AQSPGAVEEILDR	7	-0.390932	2.07583	-1.39207	0.721806	-0.966279	0.684965	-1.19396	0.795214	-3.72648	1.21486
SETX	Probable helicase senataxin	Q7Z333	DLLTTTSER	1918	0.31487	2.07314	-0.0114998	0.0450447	0.0336153	0.181845	0.143029	0.652909	0.166355	1.29415
FKBP15	FK506-binding protein 15	Q5T1M5	SQMSGVEAAASDPSEK	871	-1.2747	2.07294	0.159673	0.278354	0.38976	0.71561	0.14595	0.241458	0.346199	0.7033
PSME3IP1	PSME3-interacting protein	Q9GZU8	KLTVKPIETK	135	1.79632	2.07154	1.22184	1.06912	0.0203511	0.0125282	-0.678756	0.226223	0.663139	0.502374
RBM12	RNA-binding protein 12	Q9NTZ6	ATGEGFVEFRNEADYK	470	0.271955	2.07106	0.149052	0.88912	0.10748	0.366517	0.106265	0.705896	0.0494423	0.194343
MEF2D	Myocyte-specific enhancer factor 2D	Q14814	LDTWTLK	515	0.434492	2.07035	0.016901	0.0319411	0.121695	0.469217	0.123835	0.401461	-0.126233	0.482917
KIF13A	Kinesin-like protein KIF13A	Q9H1H9	QYLEEKR	608	-1.15709	2.07026	-0.691858	1.09967	-1.08659	1.33599	-0.336748	0.753813	-1.03286	1.8965
OSTF1	Osteoclast-stimulating factor 1	Q92882	KLAFDMATNAACASLLK	174	-1.19996	2.06998	-1.08646	1.71996	-0.506638	0.633751	-0.682364	0.963242	-1.18214	1.67687
SIPA1L1	Signal-induced proliferation-associated 1-like protein 1	O43166	QDPVVHLSPNK	1263	0.645008	2.06871	0.404761	0.984661	0.389627	0.728516	0.646286	1.74437	0.369572	0.814475
BCCIP	BRCA2 and CDKN1A-interacting protein	Q9P287	APVNTAELTDLLIQQNHIGSVIK	85	-1.10491	2.06825	-0.481281	0.690475	-0.274858	0.360161	-0.999412	1.38791	-0.790075	1.29612
NAALADL2	Inactive N-acetylated-alpha-linked acidic dipeptidase-like protein 2	Q58DX5	KDSSQDLLYSYAAYSAK	253	-1.91364	2.06743	-1.2929	1.45849	-0.870361	0.950764	-1.19767	0.871658	-2.2399	0.978076
INTS1	Integrator complex subunit 1	Q8N201	GASGGQTFHSLLTASLPPRR	1297	1.32787	2.06714	0.429415	0.40029	0.780487	0.927928	1.15775	1.63242	1.33914	2.2086
EHD3	EH domain-containing protein 3	Q9NZN3	VYIGSFWSHPLLIPDNRK	252	0.184502	2.06623	0.0481099	0.382751	-0.029987	0.130719	0.0624364	0.493912	-0.337418	1.75046
SUGP2	SURP and G-patch domain-containing protein 2	Q8IX01	ITQETFDAVLQEK	6	-0.401474	2.06438	-0.23324	0.68646	-0.0636473	0.357523	-1.28041	0.534875	-0.138876	1.10391
PDE12	2',5'-phosphodiesterase 12	Q6L8Q7	IATNALK	78	-0.346114	2.063	-0.133889	0.331811	-0.00912363	0.0247562	0.259406	1.59435	-0.0595458	0.183041
INTS7	Integrator complex subunit 7	Q9NVH2	LALSPSPR	806	-1.98746	2.0626	-0.357462	0.247606	-0.317911	0.36022	0.0391648	0.0354025	0.200685	0.213588
KIFBP	KIF-binding protein	Q96EK5	EMVSLLPTKMER	602	-1.21354	2.06258	0.423137	0.333291	0.841235	0.747931	0.987433	0.830122	-1.00248	1.36726
DYNC1H1	Cytoplasmic dynein 1 heavy chain 1	Q14204	FNALFVRPHIR	588	-0.29134	2.06172	-0.224093	1.21907	-0.321327	1.84978	-0.306457	1.61156	-0.0239307	0.0571056
MYO1C	Unconventional myosin-Ic	O00159	ENLIYTYIGPVLVSVNPYR	73	-1.35943	2.06043	-1.16571	1.53548	-0.428265	0.753787	-0.780553	1.02515	-0.275065	0.402095
AP3D1	AP-3 complex subunit delta-1	O14617	ALDLLYGMVSKK	360	-0.557852	2.06008	-0.359686	0.670062	-0.299312	0.472205	-0.0684414	0.102722	-0.165773	0.293365
GOSR1	Golgi SNAP receptor complex member 1	O95249	DILQDYTHEFHKTK	113	1.71613	2.05991	0.846546	0.641506	0.671998	0.536886	0.305727	0.131527	-0.551386	0.410562
LYPLA2	Acyl-protein thioesterase 2	O95372	FGALTAEK	183	-0.597254	2.05915	-0.0714168	0.187781	0.0816831	0.224162	-0.0664852	0.170516	-0.0472752	0.112185
JUP	Junction plakoglobin	P14923	AGDKDDITEPAVCALR	445	-0.334616	2.05909	-0.112254	0.514463	0.128621	0.644724	-0.100881	0.232367	0.0448389	0.140621
RPS3	Small ribosomal subunit protein uS3	P23396	GCEVVVSGK	133	-0.35881	2.05841	0.149058	0.628373	-0.150237	0.325554	0.0542151	0.191838	0.0363496	0.0715436
IPO7	Importin-7	O95373	YLEMIYSMCKK	714	2.01226	2.05771	1.6762	1.50203	0.825793	0.626501	0.9308	0.958004	0.704986	0.542142
TNRC6B	Trinucleotide repeat-containing gene 6B protein	Q9UPQ9	SSNASWPPEFQPGVPWK	1471	0.886582	2.05766	-0.377794	0.247652	0.401884	0.619915	0.250079	0.22564	0.548077	0.819242
CTU1	Cytoplasmic tRNA 2-thiolation protein 1	Q7Z7A3	RGLDEEATPGTPGDPARPPASK	322	-2.07259	2.05588	-0.726529	0.899654	-0.680335	0.859985	-0.654934	0.90787	-0.0154648	0.0116983
TBCK	TBC domain-containing protein kinase-like protein	Q8TEA7	ICILDGGINK	870	0.209927	2.05559	0.0581282	0.259622	0.124663	0.831268	0.0580931	0.389345	-0.0367582	0.143232
CCT3	T-complex protein 1 subunit gamma	P49368	KALDDMISTLK	128	-0.368715	2.05537	0.155559	0.498988	0.245137	1.36377	0.179477	0.826189	0.0680448	0.20109
TRIM33	E3 ubiquitin-protein ligase TRIM33	Q9UPN9	HVMNFTNWAIASGSSTALLYSK	411	-1.32144	2.05531	-0.924878	0.766582	-0.901416	0.871924	-2.20732	1.08407	-1.7248	2.06674
NFATC1	Nuclear factor of activated T-cells, cytoplasmic 1	O95644	TTDPEEGFPR	214	0.7593	2.05509	0.444447	1.11956	0.270028	0.450711	0.505196	1.7508	0.351828	0.620573
ENO1	Alpha-enolase	P06733	NFRNPLAK	427	-0.377849	2.05464	-0.113312	0.3663	-0.480856	1.0403	0.0622402	0.215698	-0.124512	0.400274
MAGED1	Melanoma-associated antigen D1	Q9Y5V3	ASQNPGAAQPR	456	1.29464	2.05464	0.384828	0.328184	1.64027	1.27392	0.71548	0.624103	2.05124	1.74189
ZNF45	Zinc finger protein 45	Q02386	YQDSVVNIQR	118	-0.487985	2.05368	0.018742	0.0474584	-0.0844307	0.199471	-0.0338667	0.0743394	-0.512294	0.410584
ZMYM4	Zinc finger MYM-type protein 4	Q5VZL5	IKDEPDNAQEYSHGQQQK	272	1.11059	2.05363	0.051572	0.0456491	-0.186428	0.209204	-0.508506	0.803563	-0.123495	0.1614
WASHC2A	WASH complex subunit 2A	Q641Q2	GPIAQWADGAISPNGHRPQLR	1064	0.405562	2.05259	0.0104782	0.0138815	0.16168	0.579826	0.3546	1.33554	-0.0123084	0.0165307
ORC4	Origin recognition complex subunit 4	O43929	LLLDNTQIMNALQKYPNCPTDVR	404	0.758437	2.05119	1.00867	2.66001	-0.236658	0.3645	0.782465	1.98251	0.818383	1.95156
EPS15L1	Epidermal growth factor receptor substrate 15-like 1	Q9UBC2	EKYSLEQDIR	399	-0.909111	2.05032	0.17241	0.231481	0.0803943	0.0841751	0.143582	0.193355	-0.0759867	0.0817012
NLRP2	NACHT, LRR and PYD domains-containing protein 2	Q9NX02	YAFYLSCR	241	1.03723	2.05005	1.03057	1.78051	1.02388	1.75876	1.42142	2.87149	1.39205	2.86483
PARP1	Poly [ADP-ribose] polymerase 1	P09874	KMVDPEKPQLGMIDR	142	-1.35992	2.04825	-1.65129	0.702541	-0.579402	0.95177	0.327734	0.177518	-1.43739	1.99887
SYNE2	Nesprin-2	Q8WXH0	TELFCQALAR	1976	2.49779	2.04815	1.46099	0.766933	1.81787	1.39392	1.91405	1.55065	1.36302	0.740474
RIN1	Ras and Rab interactor 1	Q13671	AAAALMQDR	367	1.63589	2.04745	0.730245	0.52941	0.0986786	0.0649792	1.01616	0.428807	0.59998	0.337504
POLR2B	DNA-directed RNA polymerase II subunit RPB2	P30876	GTCGIQYRQEDMPFTCEGITPDIIINPHAIPSR	943	-0.983471	2.04698	-0.307287	0.636516	0.0339721	0.0398979	-0.436205	0.556121	-0.512342	0.485036
WBP11	WW domain-binding protein 11	Q9Y2W2	ADDTSAATIEK	546	-0.300837	2.04524	-0.140887	0.679156	-0.191002	1.15346	-0.175502	0.924274	-0.216781	1.3132
N4BP3	NEDD4-binding protein 3	O15049	NQALEQELR	518	-0.611042	2.04514	-0.0588092	0.0966553	0.137717	0.576191	0.101795	0.351382	-0.0466035	0.13498
UBXN6	UBX domain-containing protein 6	Q9BZV1	KYNYTLLR	333	-0.64097	2.04509	-0.21184	0.864895	-0.0359094	0.0598678	-0.0171757	0.0434863	-0.0415469	0.0775675
DNAJC10	DnaJ homolog subfamily C member 10	Q8IXB1	ALLPELR	485	-0.628102	2.04479	-0.658901	1.52541	-0.207651	0.660313	-0.167924	0.312319	-0.175686	0.178015
CKMT1A	Creatine kinase U-type, mitochondrial	P12532	LGYILTCPSNLGTGLR	310	0.463123	2.0442	0.160075	0.511031	-0.0444113	0.107467	-0.0712623	0.107644	0.0334016	0.0574247
USP22	Ubiquitin carboxyl-terminal hydrolase 22	Q9UPT9	KLPIVACFHLK	400	-1.15944	2.04393	0.0450317	0.0263711	0.602922	0.999728	0.625204	1.00025	0.866894	1.96579
HSD17B10	3-hydroxyacyl-CoA dehydrogenase type-2	Q99714	GVIINTASVAAFEGQVGQAAYSASK	148	-0.781676	2.04373	-0.224043	0.78872	-1.01955	0.612548	-0.575074	4.35328	-0.536427	1.46659
KIAA1191	Putative monooxygenase p33MONOX	Q96A73	GAQKPSPLELIR	246	0.977633	2.0414	0.935567	2.87256	0.915926	2.6175	0.983296	2.8928	1.52496	4.96159
PPP1R13B	Apoptosis-stimulating of p53 protein 1	Q96KQ4	LYQELQIR	271	1.01239	2.03984	0.0928066	0.108302	-0.541243	0.360007	0.208289	0.305247	-0.199465	0.181595
STX12	Syntaxin-12	Q86Y82	LMNDFSAALNNFQAVQR	106	0.734251	2.03949	-0.411218	0.927126	-0.0546859	0.0798528	0.162219	0.209475	0.274466	0.449204
MCM2	DNA replication licensing factor MCM2	P49736	VRGDINVLLCGDPGTAK	513	1.4342	2.03919	1.46062	1.29154	0.974533	0.778207	1.16181	1.03093	0.387497	0.305947
PICK1	PRKCA-binding protein	Q9NRD5	TIKPMLTDLNTYLNK	227	-1.60925	2.03763	0.118648	0.116326	0.116774	0.126979	0.172598	0.197692	0.202196	0.213231
APPL2	DCC-interacting protein 13-beta	Q8NEU8	MTESHLMVTSQSLR	532	-2.54039	2.03744	-0.872029	0.39265	-1.8746	1.50402	-1.31822	0.70299	-0.779168	0.471634
METTL2A	tRNA N(3)-methylcytidine methyltransferase METTL2A	Q96IZ6	IHENGFFKDR	84	1.66194	2.03733	0.891564	0.71439	1.05482	0.801675	1.40862	1.33322	1.42473	1.11548
DYNLL1	Dynein light chain 1, cytoplasmic;Dynein light chain 2, cytoplasmic	P63167	NFGSYVTHETK	61	-0.339714	2.03723	-0.0272208	0.137695	0.0417247	0.183956	-0.0337812	0.156787	-0.0737926	0.221334
DIS3	Exosome complex exonuclease RRP44	Q9Y2L1	NVIVLQTVLQEVR	87	0.284898	2.0365	0.221057	1.77443	0.185981	1.34491	0.246766	1.98928	0.278925	2.07426
MUC16	Mucin-16	Q8WXI7	KFNTTERVLQGLLMPLFK	13347	-2.14734	2.03463	-1.62427	0.849161	-0.423354	0.188794	-0.0405641	0.025482	-0.95789	0.65091
PCNT	Pericentrin	O95613	ADFEEQLWKK	995	1.47765	2.03344	1.43207	1.42767	1.14198	1.61455	1.07771	1.07441	0.772366	0.454654
CMTR2	Cap-specific mRNA (nucleoside-2'-O-)-methyltransferase 2	Q8IYT2	MLEALSWKDK	449	-1.0262	2.03338	-0.547862	0.554105	-0.692145	1.28799	-0.039201	0.036776	-1.49118	1.435
MKI67	Proliferation marker protein Ki-67	P46013	QILDPAASVTGSR	2531	0.402728	2.03258	-0.122203	0.154334	0.294834	1.492	-0.0390774	0.0739882	0.334923	1.76069
GAPVD1	GTPase-activating protein and VPS9 domain-containing protein 1	Q14C86	TLSCVDRLEVGEVR	290	1.96975	2.03124	0.762832	0.577305	0.556301	0.39913	0.83014	0.678055	0.943376	0.724593
AMOTL1	Angiomotin-like protein 1	Q8IY63	VSSLLHKPEFPDGEMMEVLI	937	-0.745086	2.03073	0.247808	0.760582	0.163482	0.311008	-0.0151155	0.0250408	0.0397277	0.0761735
HNRNPA3	Heterogeneous nuclear ribonucleoprotein A3	P51991	GFGFVTYSCVEEVDAAMCARPHK	77	1.90424	2.03011	0.994501	0.509194	-0.0902507	0.0510016	0.306387	0.25627	0.813336	0.462888
DSP	Desmoplakin	P15924	QCEKENLGWQKLESEK	1147	0.488519	2.02954	0.0517714	0.13037	0.117537	0.261596	0.106942	0.226839	0.0888874	0.138041
TNS1	Tensin-1	Q9HBL0	LKGCPNEPNFGSLSALVYQHSIIPLALPCK	1642	-1.05542	2.02912	-0.90704	1.06101	-1.47222	1.44841	-0.895225	0.838693	-1.36387	1.39433
GSN	Gelsolin	P06396	VLRAQPVQVAEGSEPDGFWEALGGK	624	0.796416	2.02719	0.871739	2.39446	0.187404	0.311414	0.182642	0.215589	0.579008	1.18107
WDR3	WD repeat-containing protein 3	Q9UNX4	SLFAHDDSVMYLQFVPK	628	-1.24951	2.02582	-0.220896	0.204818	-0.714334	0.958624	0.0214353	0.0211381	-0.524301	0.504673
GTF2I	General transcription factor II-I	P78347	KFGEAIGMGFPVK	879	0.67887	2.02443	0.134438	0.193174	0.175433	0.294771	0.3492	0.903157	0.188655	0.32425
MAPK13	Mitogen-activated protein kinase 13	O15264	KDFTQLFPR	268	-1.68901	2.02419	-0.852116	0.934474	-0.66221	0.59394	-0.0519225	0.0719414	-0.145719	0.226853
LENG1	Leukocyte receptor cluster member 1	Q96BZ8	SRLDPLR	152	-2.65961	2.02332	-1.46968	0.739652	0.474593	0.170022	-0.899823	0.407442	0.845175	0.400568
CRK	Adapter molecule crk	P46108	VSHYIINSSGPRPPVPPSPAQPPPGVSPSR	57	1.16924	2.02258	0.264676	0.252581	0.526824	0.668757	-0.327226	0.346719	0.298004	0.388329
TNK1	Non-receptor tyrosine-protein kinase TNK1	Q13470	DVTEPGALR	390	-0.524122	2.02213	-0.298383	1.96074	-0.164239	0.791451	-0.29084	1.70143	-0.590329	2.60927
WDR33	pre-mRNA 3' end processing protein WDR33	Q9C0J8	GMQGPPHPHGIQGGPGSQGIQGPVSQGPLMGLNPR	748	-0.808529	2.0221	-0.0422796	0.0550032	-0.090768	0.139622	-0.402033	0.83124	-0.18955	0.23364
POLD3	DNA polymerase delta subunit 3	Q15054	LATPAGLKK	275	-0.502655	2.02158	-0.356851	0.500081	-0.226278	0.590765	-0.021112	0.0383388	0.143226	0.499928
NGRN	Neugrin	Q9NPE2	ELQEVESTLKR	49	-1.75375	2.01931	0.0905999	0.0670359	-0.579745	0.47737	-0.351414	0.311766	-0.648983	0.518731
MEMO1	Protein MEMO1	Q9Y316	SNRVVCR	2	-1.36415	2.01874	-0.361446	0.192775	0.293136	0.179766	0.49219	0.568232	-0.121768	0.0796903
AKAP9	A-kinase anchor protein 9	Q99996	HGEISFLNEEVK	970	-0.748306	2.01844	-0.175327	0.278457	-0.0651365	0.0593821	0.0320747	0.0351274	0.149177	0.153679
SETD1A	Histone-lysine N-methyltransferase SETD1A	O15047	RSENSYQDAFSR	300	1.62325	2.01828	-0.146523	0.0768047	-0.696487	0.563115	-0.26535	0.181174	-0.348951	0.301856
MSH3	DNA mismatch repair protein Msh3	P20585	FFGEDAEIAAR	258	-0.205502	2.01779	-0.241252	1.0918	-0.131929	1.19724	-0.13995	0.964989	-0.132876	0.560414
TRAPPC13	Trafficking protein particle complex subunit 13	A5PLN9	GVTVIGKLDIVWK	270	0.976979	2.01577	-0.00811298	0.00632567	0.560364	0.476425	-0.21301	0.254109	-0.585329	0.306707
DPF2	Zinc finger protein ubi-d4	Q92785	ILEPDDFLDDLDDEDYEEDTPK	157	2.44928	2.01471	0.3746	0.254556	0.0835933	0.0482122	0.0209802	0.0110964	0.424817	0.268299
FUBP3	Far upstream element-binding protein 3	Q96I24	TVITEEFK	76	-0.525603	2.01438	-0.229298	1.17899	-0.381752	2.26651	-0.426021	2.42909	-0.493043	2.289
MUC5B	Mucin-5B	Q9HC84	SLSPSSPHTVR	27	-1.43027	2.01437	-0.672702	1.03878	-0.392352	0.433303	-0.247133	0.315472	-0.270683	0.231729
PSMC2	26S proteasome regulatory subunit 7	P35998	KACLIFFDEIDAIGGAR	268	-0.601207	2.01366	0.0117617	0.0336279	-0.011329	0.0234195	0.0390104	0.129618	-0.143058	0.49067
CBLL1	E3 ubiquitin-protein ligase Hakai	Q75N03	KHSNLITVPIQDDSNSGAR	288	-0.740491	2.01365	0.0979624	0.144615	0.28088	1.20962	0.18289	0.518291	0.176587	0.60775
NPEPL1	Probable aminopeptidase NPEPL1	Q8NDH3	CGDLVHPLVYCPELHFSEFTSAVADMK	404	1.04251	2.01259	-0.381314	0.386228	0.870918	0.892398	-0.539959	0.521167	0.168584	0.185918
SPR	Sepiapterin reductase	P35270	QLEAELGAER	49	0.807836	2.01109	0.149726	0.175786	-0.598588	0.596288	-1.39114	0.843456	-1.70697	1.23275
CHAF1B	Chromatin assembly factor 1 subunit B	Q13112	QAPAPTVIRDPPSITPAVK	439	0.897825	2.01038	-0.177704	0.209308	0.0818236	0.0558154	-0.223316	0.237861	0.494038	0.919237
CDC73	Parafibromin	Q6P1J9	GWPWLLPDGSPVDIFAK	456	0.957227	2.01018	0.531308	1.23638	-0.533268	0.485123	-0.290808	0.32678	-0.0615057	0.0485893
ELAC2	Zinc phosphodiesterase ELAC protein 2	Q9BQ52	VVYSGDTMPCEALVR	661	1.58676	2.0097	1.11681	0.937854	1.16301	0.737536	2.26745	2.85024	1.36608	1.24988
DPP9	Dipeptidyl peptidase 9	Q86TI2	KYSGLIVNK	43	-0.718442	2.00916	-0.63195	0.791601	-0.104978	0.186661	-0.241936	0.507861	-0.36897	0.727257
EXOC6B	Exocyst complex component 6B	Q9Y2D4	NIGLTELVQIIINTTHLEK	550	-3.78092	2.0086	0.228743	0.0660326	0.417717	0.116257	-0.452208	0.105187	-1.37631	0.419454
CCDC50	Coiled-coil domain-containing protein 50	Q8IVM0	YKDLEQQDCEIAQEIQEK	77	0.257303	2.00664	0.0952188	0.559642	0.130312	0.805988	-0.000240536	0.000925328	0.10228	0.456452
RRBP1	Ribosome-binding protein 1	Q9P2E9	CEELSGLHGQLQEAR	933	0.496985	2.00662	0.0764333	0.14462	0.372407	1.63453	0.519632	2.805	0.482003	2.17905
SF3B1	Splicing factor 3B subunit 1	O75533	KMVMETIEK	866	-1.31357	2.00565	-0.142195	0.132051	0.155778	0.147548	-0.453889	0.37254	-0.118869	0.0618982
MMAB	Corrinoid adenosyltransferase MMAB	Q96EY8	VVPLVQMGETDANVAK	196	-1.39904	2.00544	-0.890886	0.760043	-0.0497397	0.07444	-0.343866	0.333591	-0.257163	0.2112
RRBP1	Ribosome-binding protein 1	Q9P2E9	EKGPTLLK	1091	-1.68593	2.00479	-0.059846	0.115805	-0.259081	0.519282	0.0899674	0.225518	-0.0401095	0.0677699
ATP5F1B	ATP synthase subunit beta, mitochondrial	P06576	VALVYGQMNEPPGAR	265	-0.294858	2.0047	-0.0210033	0.139655	-0.0650519	0.588807	-0.0466389	0.344039	0.000777555	0.004572
PSMC6	26S proteasome regulatory subunit 10B	P62333	LIREMFNYAR	214	-1.18004	2.00383	-0.816647	0.630673	-0.855739	0.926389	-0.265099	0.255766	-0.544773	0.510791
ZSWIM8	Zinc finger SWIM domain-containing protein 8	A7E2V4	GGWAPTSWGR	1166	0.563285	2.00138	0.271461	0.809355	0.0624729	0.0799751	0.461147	1.30611	0.0745901	0.0931768
STK35	Serine/threonine-protein kinase 35	Q8TDR2	HQNVVQFEECVLQR	258	-1.57301	2.00128	-0.609441	0.692489	-1.07017	1.56772	-0.639076	0.775376	-0.686881	0.690689
FARSA	Phenylalanine--tRNA ligase alpha subunit	Q9Y285	THSQGGYGSQGYKYNWK	299	-1.50487	2.00045	0.419386	0.310918	0.615217	0.723408	0.601098	0.526654	0.136755	0.0943881
RCHY1	RING finger and CHY zinc finger domain-containing protein 1	Q96PM5	TCYEEMLK	171	-0.528334	2.00045	-0.472925	1.14288	-0.529642	1.66027	-0.253743	0.42412	-0.917393	1.38619
FRS2	Fibroblast growth factor receptor substrate 2	Q8WU20	LVYENINGLSIPSASGVRR	304	0.619152	1.99808	-0.19267	0.153467	-0.217021	0.50689	-0.139249	0.124591	0.149869	0.199596
PDCD6IP	Programmed cell death 6-interacting protein	Q8WUM4	TMPPTKPQPPARPPPPVLPANR	746	-0.636426	1.99741	-0.0366157	0.0655442	-0.220234	0.468483	-0.168429	0.400398	-0.180355	0.357546
CFL1	Cofilin-1	P23528	LTGIKHELQANCYEEVK	128	0.529254	1.99658	0.29571	0.956407	0.316107	0.948715	-0.0644012	0.12053	0.08271	0.176519
OSBPL2	Oxysterol-binding protein-related protein 2	Q9H1P3	ASCQPQPLER	120	-0.278661	1.99545	-0.0206602	0.0748416	0.12961	0.592573	0.571375	3.15255	1.13993	6.33529
CGN	Cingulin	Q9P2M7	LASSEGFQKPSASLSQLESQNQLLQER	1034	0.515938	1.99394	0.0520475	0.104911	-0.15425	0.361803	-0.290035	0.530128	-0.608361	1.91366
PDIA3	Protein disulfide-isomerase A3	P30101	FAHTNVESLVNEYDDNGEGIILFRPSHLTNKFEDK	184	-3.47911	1.99357	1.04041	0.508463	1.64142	1.04571	1.43473	0.855686	1.88738	1.20633
ISY1	Pre-mRNA-splicing factor ISY1 homolog	Q9ULR0	ELGGPDYGKVGPK	93	0.464852	1.99279	0.0246099	0.0506321	0.0915168	0.237358	-0.226567	0.609463	0.238373	0.772876
HNRNPLL	Heterogeneous nuclear ribonucleoprotein L-like	Q8WVV9	QAILGEHPSSFRHDGYGSHGPLLPLPSR	276	0.986788	1.99252	-1.57348	1.53953	-1.30243	1.40635	0.164547	0.183672	-1.08059	0.827776
KDM5B	Lysine-specific demethylase 5B	Q9UGL1	ILNPYNLFLSGDSLR	178	0.454331	1.99248	0.438838	1.16485	0.101996	0.247759	0.438563	1.78883	0.345247	1.33524
SCCPDH	Saccharopine dehydrogenase-like oxidoreductase	Q8NBX0	GYSIPFMGSDVSVVR	243	-2.58728	1.99216	-0.917279	0.368945	0.42774	0.132122	-1.81834	1.22272	-0.902734	0.355816
SESTD1	SEC14 domain and spectrin repeat-containing protein 1	Q86VW0	TVVVMLQNVVPAEVSLVCVVKPDEFWDK	79	-1.09095	1.99209	-0.225625	0.254271	-0.402573	0.515357	0.129857	0.169623	-0.496944	0.665356
BPTF	Nucleosome-remodeling factor subunit BPTF	Q12830	EVPYFNYNAKPALDIWPYPSPRPTFGITWR	1865	-2.14751	1.9915	-1.26913	1.12286	0.030162	0.0164629	-1.83359	1.51651	-2.1044	1.59175
PUS7L	Pseudouridylate synthase PUS7L	Q9H0K6	LDLQNLSLEDGR	73	0.176697	1.99003	-0.0366874	0.261718	-0.0666789	0.38922	-0.221627	1.11756	-0.0881195	0.409704
CSE1L	Exportin-2	P55060	NPSKPHFNHYMFEAICLSIR	608	-1.42134	1.98981	-0.8116	1.21553	-0.504628	0.658691	-0.555706	0.490711	-0.566685	0.764104
USP38	Ubiquitin carboxyl-terminal hydrolase 38	Q8NB14	LILNQSAWTSQSNSLASCLSR	415	1.09095	1.9898	0.067823	0.069636	0.333137	0.324602	0.687007	0.6719	0.586902	0.863877
CANX	Calnexin	P27824	KIPNPDFFEDLEPFR	401	-0.552671	1.98759	-0.592815	1.22171	-0.512429	1.17376	-0.781018	1.991	-0.390647	1.17509
PHKA1	Phosphorylase b kinase regulatory subunit alpha, skeletal muscle isoform	P46020	VPVGFYQK	1067	-0.666256	1.98728	-0.193647	0.746401	-0.223592	0.717699	-0.0309099	0.0916846	-0.177706	0.307932
GTPBP1	GTP-binding protein 1	O00178	MCPIFQISNVTGENLDLLK	359	1.95027	1.98709	1.96756	2.84652	1.47758	1.33003	1.63089	2.78954	0.850648	0.621617
H1-5	Histone H1.5	P16401	RKATGPPVSELITK	36	-0.942517	1.9869	-0.0835418	0.0523721	0.305408	1.06974	0.112823	0.280388	0.430866	1.61544
MRPL38	Large ribosomal subunit protein mL38	Q96DV4	KHQETMTPAGLSFFQCR	306	2.06423	1.9863	-0.154392	0.0964278	0.0898433	0.0587553	0.0828043	0.0421824	0.198516	0.0588278
STARD7	StAR-related lipid transfer protein 7, mitochondrial	Q9NQZ5	DYISAKPLEMSSEAK	334	-1.14723	1.98482	0.116725	0.17058	-0.00497639	0.00602234	-0.23344	0.221587	-0.33768	0.259984
MNAT1	CDK-activating kinase assembly factor MAT1	P51948	LFIQKEEQLQQILKR	163	0.620534	1.98426	0.145486	0.33069	0.134344	0.289994	-0.00556276	0.00806412	0.0630308	0.0809845
AHNAK	Neuroblast differentiation-associated protein AHNAK	Q09666	LQGSGVSLASKK	5848	0.446241	1.98165	0.0602242	0.138321	0.207137	0.606806	0.207801	0.715697	-0.0757979	0.170734
VPS33A	Vacuolar protein sorting-associated protein 33A	Q96AX1	VLDYYKR	424	-0.426137	1.98074	-0.214514	0.590241	-0.347709	1.31958	-0.142045	0.640619	-0.114709	0.545245
SRCAP	Helicase SRCAP	Q6ZRS2	GAASTLVPGVSETSASPGSPSVR	2772	-2.80533	1.9788	-2.87885	2.0027	-1.17374	0.461517	-1.65534	0.808681	-0.569941	0.18158
CAD	Multifunctional protein CAD	P27708	LRQELGICPAVK	890	-1.60763	1.97866	0.064484	0.0893993	0.200891	0.290153	0.350928	0.730113	0.306703	0.653707
TAX1BP1	Tax1-binding protein 1	Q86VP1	EQLECQLK	267	-0.513821	1.97675	-0.918598	1.09613	-0.701833	1.33144	-0.497913	1.12852	-0.28907	0.673238
METTL3	N6-adenosine-methyltransferase catalytic subunit	Q86U44	YLDVSILGK	380	-1.02593	1.97514	-0.492493	1.11854	-0.33921	0.667863	-0.411471	0.638617	-0.504657	0.843648
PTPN23	Tyrosine-protein phosphatase non-receptor type 23	Q9H3S7	YMEVHEK	501	-0.893647	1.97439	-0.56394	1.02906	-0.209887	0.399222	-0.446814	0.587491	0.0442737	0.0724062
KPNA2	Importin subunit alpha-1	P52292	QPPIDNIIR	109	0.677596	1.97294	-0.090816	0.0810854	0.135565	0.167612	-0.113814	0.119367	-0.315306	0.283892
TUBA1B	Tubulin alpha-1B chain	P68363	CDPRHGKYMACCLLYR	305	-1.79964	1.97214	-0.467317	0.324839	-0.430784	0.231085	-0.918959	0.666219	0.106681	0.0944654
CRACD	Capping protein-inhibiting regulator of actin dynamics	Q6ZU35	LTEKVETAQPLWITLALQK	1078	1.58845	1.97213	0.645362	0.633046	0.468188	0.32515	0.68416	0.668296	0.250861	0.152632
DYRK1B	Dual specificity tyrosine-phosphorylation-regulated kinase 1B	Q9Y463	DYQGPGTR	366	0.949429	1.9711	0.449335	0.590511	0.0796418	0.0703046	0.278438	0.247168	0.323054	0.377394
EAPP	E2F-associated phosphoprotein	Q56P03	TMEDKLSSLGTGSSSGNGK	75	-0.320199	1.97065	-0.0656033	0.286079	-0.0692371	0.359097	-0.155929	0.754247	-0.200394	1.10901
RANBP2	E3 SUMO-protein ligase RanBP2	P49792	NFQWANTGAAVFGTQSVGTQSAGK	2869	0.477081	1.97016	-0.0976852	0.270294	-0.211266	0.434562	-0.180433	0.584803	-0.743516	1.81758
SMC4	Structural maintenance of chromosomes protein 4	Q9NTJ3	GKVLDAIIQEK	597	-1.26631	1.96971	-0.61084	1.11767	-0.789916	1.88817	-0.561369	1.44294	-1.71409	1.6434
HMGN3	High mobility group nucleosome-binding domain-containing protein 3	Q15651	EGTAPSENGETKAEEAQKTESVDNEGE	73	-1.15973	1.96941	-0.402524	0.703554	-0.276484	0.444589	-0.890751	1.52124	-0.449598	0.798092
EIF3B	Eukaryotic translation initiation factor 3 subunit B	P55884	GIALWGGEK	356	0.880717	1.96807	-0.0192845	0.011492	0.284256	0.387924	0.996446	2.54279	0.939888	1.7828
ZCCHC8	Zinc finger CCHC domain-containing protein 8	Q6NZY4	QLGYPPGWLK	315	0.503768	1.96706	-0.0733135	0.0766301	0.180417	0.288383	0.27206	0.700262	-9.50788e-05	0.000100662
NCAPG	Condensin complex subunit 3	Q9BPX3	TMDDKTVFHEEFIHYLK	37	-1.61485	1.96684	-0.0572894	0.0783879	0.1257	0.240939	-0.0252982	0.0361262	0.0397567	0.0646191
RPS4X	Small ribosomal subunit protein eS4, X isoform	P62701	ITPEEAKYK	114	-3.87789	1.96656	0.134112	0.527293	0.264657	1.15998	0.0924431	0.270871	-1.05752	0.40644
OFD1	Centriole and centriolar satellite protein OFD1	O75665	LQLIDDQFADAYPQR	176	-0.530852	1.96524	-1.16204	1.25868	-0.0615878	0.138365	-0.955753	0.800791	-0.493128	1.86683
MMP15	Matrix metalloproteinase-15	P51511	VWEQATPLVFQEVPYEDIR	170	0.502531	1.96518	-0.481538	0.291514	0.0712607	0.146593	0.0186058	0.0185721	0.306513	0.988193
PRPF40A	Pre-mRNA-processing factor 40 homolog A	O75400	QAAPPIELDAVWEDIR	756	0.334728	1.96507	0.0822657	0.237732	-0.0023602	0.0063089	0.139404	0.476722	0.0543651	0.214701
PDLIM3	PDZ and LIM domain protein 3	Q53GG5	HPECFVCADCNLNLK	314	-1.28454	1.96487	-0.24003	0.368846	-0.0819414	0.135416	-0.690339	0.696531	-0.797393	0.939965
CSK	Tyrosine-protein kinase CSK	P41240	SAIQAAWPSGTECIAK	2	0.346006	1.96351	-0.392103	1.478	-0.0889474	0.19214	-0.185064	1.27691	-0.353758	1.48395
WAPL	Wings apart-like protein homolog	Q7Z5K2	TDELIKDAPTTQHDK	1054	-1.70771	1.96317	0.0838172	0.133355	0.187907	0.303173	-0.767917	0.970608	-0.0432748	0.0454442
DARS1	Aspartate--tRNA ligase, cytoplasmic	P14868	EIMDAAEDYAK	16	-0.456673	1.96291	-0.178997	1.59319	-0.170686	1.08795	-0.271571	2.36838	-0.120509	0.526517
SLMAP	Sarcolemmal membrane-associated protein	Q14BN4	CFELQALLEEER	520	-1.30323	1.96199	-0.625329	0.496979	-0.250654	0.185657	-0.331422	0.49248	-0.76615	1.10789
NXF1	Nuclear RNA export factor 1	Q9UBU9	CLQDNNWDYTR	588	0.318848	1.96093	0.0253813	0.106431	0.0862354	0.233505	0.138635	0.568788	-0.100725	0.12959
DTL	Denticleless protein homolog	Q9NZJ0	LVTAAGDQTAK	113	0.352712	1.9605	-0.091222	0.141607	-0.268872	0.518539	-0.292224	0.887427	0.0725382	0.137795
CHD4	Chromodomain-helicase-DNA-binding protein 4	Q14839	ADVTRLPATIAR	1866	-0.238921	1.95985	-0.10655	0.388932	0.0952665	0.335188	0.091096	0.363587	0.0800996	0.422587
POF1B	Protein POF1B	Q8WVV4	LTTYPQTTIRK	128	1.37012	1.95936	0.894104	0.972781	0.409799	0.355629	0.0706405	0.0421709	0.218411	0.170669
MYO18A	Unconventional myosin-XVIIIa	Q92614	ELELQRRPTGDFGFSLR	220	-0.986569	1.95809	-0.545177	0.703433	-0.883473	1.34176	-0.944991	1.40442	-1.21533	1.59292
PPP1R9A	Neurabin-1	Q9ULJ8	ALGMTASQDR	1029	1.10219	1.9575	0.649053	0.881501	0.0587263	0.0590293	-0.219522	0.24494	-0.731712	0.468385
PPCS	Phosphopantothenate--cysteine ligase	Q9HAB8	LLLSEEEIEKGVEIEEK	278	-0.593401	1.95747	0.0144569	0.0345749	-0.271322	0.619128	-0.367111	1.39828	-0.334495	0.684697
BIRC6	Baculoviral IAP repeat-containing protein 6	Q9NR09	VSDTPSITAK	3873	-1.94731	1.95728	0.598679	1.40118	0.303184	0.440808	0.63825	2.14774	0.631595	1.80326
EIF4G2	Eukaryotic translation initiation factor 4 gamma 2	P78344	QDAVKDLGVFIPAPMAQGMR	328	-2.06593	1.95719	0.0119524	0.0152873	-1.04276	0.743744	-0.204319	0.283843	-0.45007	0.439318
PDXDC1	Pyridoxal-dependent decarboxylase domain-containing protein 1	Q6P996	LLENMTEVVR	605	-0.377464	1.95698	-0.0621569	0.338361	0.225313	1.50637	0.141125	1.0042	0.104506	0.679713
YEATS2	YEATS domain-containing protein 2	Q9ULM3	ETDPDYEDVSVALPNKR	10	-1.54685	1.95679	-1.57819	1.82536	-0.958769	0.702694	-0.548979	0.606774	-0.644798	0.960068
LIG1	DNA ligase 1	P18858	AETPTESVSEPEVATKQELQEEEEQTKPPR	193	1.81402	1.9559	1.32237	1.05241	1.29256	1.38612	0.763488	0.430741	0.525228	0.339177
RBMX	RNA-binding motif protein, X chromosome	P38159	AIKVEQATKPSFESGRR	78	-1.13382	1.95538	-0.593585	0.99021	-0.00584256	0.0186017	-0.225888	0.933262	-0.180024	0.60509
NUP85	Nuclear pore complex protein Nup85	Q9BW27	CLEDLTSR	603	0.25728	1.95475	-0.0943145	0.223665	0.146189	0.590135	0.231036	2.47883	0.153783	0.7507
LSG1	Large subunit GTPase 1 homolog	Q9H089	LLYCHPPPGRDPVTFQHQHQR	544	-1.27428	1.95461	-0.21677	0.200125	-0.353408	0.217547	-0.483327	0.653211	-0.718819	0.518158
SNX2	Sorting nexin-2	O60749	RFSDFLGLHSK	183	1.8107	1.95306	2.27336	2.53602	1.21548	0.657286	2.26719	2.47843	2.79766	3.31914
IGBP1	Immunoglobulin-binding protein 1	P78318	AAEDELQLPR	2	1.05492	1.95202	-0.836903	0.533898	0.804233	1.12592	1.40133	2.32109	0.456471	0.501161
EVL	Ena/VASP-like protein	Q9UI08	ASSGGGGGGLMEEMNK	258	-2.0355	1.95093	-0.20834	0.0927919	0.0340848	0.0154965	-0.21711	0.120944	0.33502	0.212356
FHIP2B	FHF complex subunit HOOK-interacting protein 2B	Q86V87	LALFPHPHIHEYLLDPYISLAPGCR	632	1.75309	1.94953	-0.416488	0.257608	-0.159271	0.118357	-0.856435	1.00497	-0.344892	0.28679
CABIN1	Calcineurin-binding protein cabin-1	Q9Y6J0	TSTVSADLANLLKR	998	1.31929	1.94881	0.884908	0.963369	0.667346	0.548848	0.312967	0.256151	0.915855	0.939274
ARHGAP26	Rho GTPase-activating protein 26	Q9UNA1	GLPALEFSDCCLDSPHFR	2	-0.804232	1.94797	0.122645	0.230605	0.113778	0.184932	-0.00752516	0.00845052	-0.183611	0.415274
GPATCH1	G patch domain-containing protein 1	Q9BRR8	AIVTTDDFASK	109	-0.424434	1.94789	-0.108691	0.50117	-0.317153	0.97751	-0.16359	0.843941	-0.164485	0.653815
GAPVD1	GTPase-activating protein and VPS9 domain-containing protein 1	Q14C86	LLASIAEDYR	1199	0.384316	1.94767	0.232345	0.9199	0.127521	0.464733	0.0811932	0.246325	-0.0331138	0.0583456
ABTB3	Ankyrin repeat and BTB/POZ domain-containing protein 3	A6QL63	SNKPGELPMFSQSELR	396	-1.6279	1.94711	-0.322604	0.282239	0.502893	1.16514	-0.536367	0.501558	-0.507282	0.316476
STRN4	Striatin-4	Q9NRL3	LKFGTDLNQGEK	135	-1.01943	1.9466	-1.1521	2.00157	-0.861096	1.41752	-0.771086	1.13686	-0.382067	0.397462
DRG2	Developmentally-regulated GTP-binding protein 2	P55039	KGGGISFNSTVTLTQCSEK	183	-0.543254	1.94608	-0.0437603	0.177066	-0.0168545	0.0514619	-0.221529	0.79944	-0.368042	1.53057
TPR	Nucleoprotein TPR	P12270	SKSLESQVENLQK	1490	0.784083	1.94601	-0.0997666	0.121883	-0.154036	0.220411	-0.395035	0.786278	-0.224483	0.348408
AR	Androgen receptor	P10275	ALLLFSIIPVDGLK	810	2.33649	1.94578	0.0732996	0.0227243	-0.731952	0.310811	-0.317949	0.0997207	1.5821	1.18668
PHF10	PHD finger protein 10	Q8WUB8	AYFDLQTHVIQVPQGK	224	0.295405	1.94433	0.0181679	0.0533969	-0.187982	0.790394	-0.426686	1.78635	-0.217454	0.482669
MRRF	Ribosome-recycling factor, mitochondrial	Q96E11	ESGMNLNPEVEGTLIRVPIPQVTR	164	-0.29403	1.94359	-0.122938	0.274235	-0.225038	1.39706	-0.223765	1.00736	-0.248074	0.865144
PPP1R21	Protein phosphatase 1 regulatory subunit 21	Q6ZMI0	YSQYNALNVPLHNRR	233	0.831187	1.94358	0.227574	0.280713	0.454643	0.958002	0.505994	1.04687	0.697008	1.50529
WDR3	WD repeat-containing protein 3	Q9UNX4	TMTCEYALCSFFVPGDR	451	-0.795939	1.94166	-0.669513	1.19119	-0.439154	0.756962	-0.543932	0.821946	-0.873829	1.39977
ZBTB38	Zinc finger and BTB domain-containing protein 38	Q8NAP3	SPQPAAVLTR	297	-2.29008	1.94084	-0.478004	1.10618	-0.585252	1.64217	-0.0945725	0.137181	-0.384989	0.857473
GATD1	Glutamine amidotransferase-like class 1 domain-containing protein 1	Q8NB37	YHALLIPSCPGALTDLASSGSLAR	86	-0.925024	1.93861	0.223139	0.296013	0.529137	1.07342	0.227919	0.542567	0.176157	0.333559
JMJD1C	Probable JmjC domain-containing histone demethylation protein 2C	Q15652	TMPNILDDIIASVVENKIPPSK	2104	-1.85926	1.93798	-1.54984	1.71524	-1.4297	1.29875	-0.380051	0.562008	-0.652612	0.428489
MARS1	Methionine--tRNA ligase, cytoplasmic	P56192	TSPKPAVVETVTTAKPQQIQALMDEVTK	824	-1.12855	1.93791	0.123502	0.215753	0.262195	0.727681	0.185899	0.284714	0.0735994	0.0924008
MTMR4	Myotubularin-related protein 4	Q9NYA4	EEENLQVPFTVLQGEGVEFLGR	26	-1.47251	1.93767	-0.047291	0.0533173	-0.297305	0.357864	-0.397269	0.532291	-0.514381	0.577311
DMXL1	DmX-like protein 1	Q9Y485	KNDPLDAAIFYLAMK	1633	-2.01468	1.93706	-0.770867	0.994324	-1.08305	1.17858	-0.856772	1.25107	-0.365389	0.385612
C19orf12	Protein C19orf12	Q9NSK7	LLCSLSGER	22	0.454818	1.9348	-0.0234496	0.041474	0.280038	1.07469	-0.0434952	0.0574139	0.236647	0.483034
SENP1	Sentrin-specific protease 1	Q9P0U3	LTDSEDEFPEITEEMEKEIK	413	2.3391	1.93429	2.65501	1.61949	2.25475	1.97215	2.60049	1.80316	1.87439	1.04432
RNF31	E3 ubiquitin-protein ligase RNF31	Q96EP0	LLQDNNVMFNTEPPAGAR	945	-0.568436	1.93386	0.231611	0.735601	0.14736	0.313178	0.215941	0.587908	0.13566	0.308515
MRPL58	Large ribosomal subunit protein mL62	Q14197	SIYSLDKLYPESQGSDTAWR	41	0.451168	1.93374	0.0375149	0.0948442	-0.091097	0.249564	-0.108764	0.252978	-0.352159	0.730919
PUS7L	Pseudouridylate synthase PUS7L	Q9H0K6	NQEVHTLIK	85	0.984504	1.93331	0.0767728	0.0760633	0.173266	0.0899853	0.486194	0.555454	0.227762	0.22078
YWHAE	14-3-3 protein epsilon	P62258	AASDIAMTELPPTHPIR	154	-4.1867	1.93297	-1.54098	0.694405	-1.03826	0.345381	-0.882224	0.372446	-0.269613	0.084557
NSD1	Histone-lysine N-methyltransferase, H3 lysine-36 specific	Q96L73	GGAANQALLHSK	770	-0.851967	1.93286	-0.582774	0.487429	-0.144272	0.20482	-0.280983	0.245388	-0.29223	0.373663
GPI	Glucose-6-phosphate isomerase	P06744	AVLHVALR	97	-0.435074	1.93229	0.0119778	0.0311102	0.0698791	0.235917	0.204008	0.741208	1.39824	6.49155
PRPF8	Pre-mRNA-processing-splicing factor 8	Q6P2Q9	FTLWWSPTINR	1534	0.198939	1.9322	0.0545464	0.216389	0.170197	0.715912	0.428723	2.18687	0.22247	0.572053
NUP205	Nuclear pore complex protein Nup205	Q92621	RHALESWR	1280	1.44525	1.92932	1.1904	1.13505	1.39994	2.13879	0.568099	0.71777	1.13498	0.843539
SHTN1	Shootin-1	A0MZ66	VNQSENSVPPPPPPPPPLPPPPPNPIR	345	-0.855171	1.92932	-0.833383	1.11732	-1.80082	2.75958	-1.17097	1.60858	-1.08342	3.06574
ZCCHC8	Zinc finger CCHC domain-containing protein 8	Q6NZY4	EYMDACGEANNQNFQQR	257	-2.60703	1.92898	0.0570987	0.0149491	0.304621	0.0993084	1.57865	0.878129	1.17696	0.445247
MTHFD2	Bifunctional methylenetetrahydrofolate dehydrogenase/cyclohydrolase, mitochondrial	P13995	QKAGYITPVPGGVGPMTVAMLMK	300	1.36584	1.92882	0.32537	0.204056	0.83311	0.707714	1.2046	1.63182	0.935807	1.33228
MRPL3	Large ribosomal subunit protein uL3m	P09001	HNIIYVNGSVPGHK	280	0.506454	1.92736	0.184629	0.511686	0.399992	1.37782	0.429303	1.67631	0.441	1.25912
HSPH1	Heat shock protein 105 kDa	Q92598	SVNEVMEWMNNVMNAQAK	754	-0.299997	1.92722	-0.0771693	0.345218	-0.173806	0.937543	-0.257348	2.14308	-0.257912	0.70428
PURA	Transcriptional activator protein Pur-alpha	Q00577	GPGLGSTQGQTIALPAQGLIEFR	177	2.47482	1.92683	0.088856	0.0286943	1.18302	0.580233	1.87363	1.3557	-0.540407	0.0950441
ELP3	Elongator complex protein 3	Q9H9T3	KGDLSPAELMMLTIGDVIK	6	-1.72806	1.92617	-1.19317	0.843609	-0.553754	0.319531	-0.202998	0.127512	-0.225498	0.213104
GRHL2	Grainyhead-like protein 2 homolog	Q6ISB3	TMPDLHSQPVLFIPDVHFANLQR	470	-1.90399	1.92584	-1.67098	1.28898	-0.923995	0.642495	-0.835939	0.433715	-1.26648	0.548255
LRPPRC	Leucine-rich PPR motif-containing protein, mitochondrial	P42704	QYFHQLEK	606	-3.93505	1.92578	0.569908	0.200269	1.06172	0.53737	1.96769	1.21928	1.32555	0.65715
CENPF	Centromere protein F	P49454	QQLENNLEEFKQK	447	1.50592	1.92504	1.2875	1.45397	0.68	0.637552	0.966383	0.96413	1.46804	1.70953
FAM76B	Protein FAM76B	Q5HYJ3	SSATIQNETPK	207	-0.630825	1.92504	-0.421738	0.860833	-0.794662	2.96256	-0.73363	2.05109	-0.254555	0.563803
TMCO6	Transmembrane and coiled-coil domain-containing protein 6	Q96DC7	LRPTVCGVEELR	9	-0.647477	1.92493	-0.374133	0.92193	-0.552089	0.833297	-0.608229	1.23165	-0.592803	1.19212
VARS1	Valine--tRNA ligase	P26640	SKDVVEPLLRPQWYVR	666	0.400314	1.92396	0.0800414	0.197153	0.0522236	0.12995	-0.140299	0.428597	0.441388	1.88573
PDS5A	Sister chromatid cohesion protein PDS5 homolog A	Q29RF7	RDLALVNDQLLGFVR	390	-0.902567	1.92332	-0.261353	0.340109	-0.424608	0.621471	0.21039	0.355489	-0.807314	0.887732
TACC3	Transforming acidic coiled-coil-containing protein 3	Q9Y6A5	SGAGEDPPMPASR	388	0.301633	1.92187	0.0473561	0.175095	-0.0386139	0.0942368	0.117402	0.605419	0.198308	0.796258
TFE3	Transcription factor E3	P19532	ASVDYIR	391	3.63585	1.92148	1.45195	0.529405	-0.0333649	0.00818288	0.132099	0.0280487	0.457596	0.115362
PARP1	Poly [ADP-ribose] polymerase 1	P09874	IAPPEAPVTGYMFGK	879	-0.58365	1.92114	-0.0459255	0.0608927	0.0402084	0.0849736	0.139347	0.353695	0.324692	0.815199
TGIF2	Homeobox protein TGIF2	Q9GZN2	GELESPKPLVTPGSTLTLLTR	149	-0.375517	1.91967	-0.189112	0.803709	-0.0147082	0.0423484	-0.111019	0.421341	-0.450931	1.06841
SMC4	Structural maintenance of chromosomes protein 4	Q9NTJ3	LKLEQIDGHIAEHNSK	1016	-0.680389	1.91947	-0.0155025	0.0299861	-0.0158391	0.0282731	-0.155664	0.323118	0.0702162	0.166602
SSH2	Protein phosphatase Slingshot homolog 2	Q76I76	FVELSQETR	659	-1.11218	1.91884	-0.0712966	0.0840099	-0.0784786	0.082622	-0.189064	0.247317	-0.084966	0.103427
RPL8	Large ribosomal subunit protein uL2	P62917	VVFRDPYR	61	-3.39287	1.91749	-3.22294	1.07069	-2.28022	1.08835	-1.40536	0.896921	-0.472498	0.744
RETSAT	All-trans-retinol 13,14-reductase	Q6NUM9	RPPAPLVTDKEAR	39	-1.3598	1.91688	-0.601729	0.424015	0.365497	0.294072	0.243136	0.212886	-0.275661	0.19765
SYNJ2	Synaptojanin-2	O15056	TIQSNFFDGVKQEAIK	467	-1.3845	1.91585	-0.0555343	0.0711706	0.209464	0.369233	-0.121323	0.141623	0.0471912	0.0563726
INTS4	Integrator complex subunit 4	Q96HW7	NKCLQLLGNLGSLEK	168	2.27769	1.9144	1.0496	0.486545	1.25704	0.717963	1.34231	1.02221	1.8679	1.47746
ARCN1	Coatomer subunit delta	P48444	NSNILEDLETLR	73	-0.181028	1.91176	-0.0471092	0.163583	-0.0457822	0.21091	-0.0591715	0.287983	0.0908377	0.707776
SUN1	SUN domain-containing protein 1	O94901	LLFSEDQQGGSLEQLLQR	519	1.89819	1.9117	1.40633	1.07674	-0.0620813	0.0255019	1.17577	0.944097	-0.56006	0.304106
EDC4	Enhancer of mRNA-decapping protein 4	Q6P2E9	SLAFHRPPYHLLQQR	855	-0.595117	1.91097	0.30199	0.744646	0.0620187	0.0862109	0.371852	1.27882	0.312963	0.912295
INTS14	Integrator complex subunit 14	Q96SY0	SYAQNVTVWIKPSGLQTDVQK	398	0.641464	1.91097	-0.0982059	0.0969969	-0.237765	0.269195	-0.714322	1.36384	-0.69921	0.954458
DNMT3A	DNA (cytosine-5)-methyltransferase 3A	Q9Y6K1	GFSWWPGR	302	1.29793	1.91088	0.840359	0.97008	0.427424	0.386694	0.655988	0.509791	0.224972	0.178585
PPL	Periplakin	O60437	SYQSELEALR	1211	-0.168034	1.9108	-0.0324142	0.252886	-0.00226943	0.00996979	0.0139066	0.106306	0.018869	0.10982
SYNCRIP	Heterogeneous nuclear ribonucleoprotein Q	O60506	KLKDYAFIHFDER	369	0.532835	1.91062	-0.037065	0.0740144	-0.272659	0.429606	-0.162093	0.272239	-0.0596649	0.0737257
KNL1	Kinetochore scaffold 1	Q8NG31	KLEDNYCEITGMNTLLSAPIHTQMQQK	124	3.91611	1.90973	3.23357	1.28714	2.24257	0.573185	3.0843	1.23209	2.77793	0.955849
TESMIN	Tesmin	Q9Y4I5	SPAVLPLGAWVLEGASHPGVR	134	0.533832	1.9081	0.209937	0.611912	0.241404	0.796014	0.0439055	0.0732647	-0.174146	0.40564
STK4	Serine/threonine-protein kinase 4	Q13043	YYGSYFK	88	-0.345883	1.90647	-0.0544081	0.343477	0.0392707	0.218349	0.0764972	0.628001	-0.0579532	0.329712
DDAH1	N(G),N(G)-dimethylarginine dimethylaminohydrolase 1	O94760	AGLGHPAAFGRATHAVVRALPESLGQHALR	2	-2.64325	1.90626	1.94102	1.37175	1.54341	0.924264	1.0615	0.457318	1.22127	0.512044
CDKAL1	Threonylcarbamoyladenosine tRNA methylthiotransferase	Q5VV42	NPAEDHFR	113	1.29026	1.90621	0.914072	1.01442	1.02256	0.968759	1.33301	1.5126	1.2627	2.1503
EPPK1	Epiplakin	P58107	YEQLLALCVTDPETGLAFLPLSGGPR	448	-2.02775	1.90543	-1.21177	0.913345	-0.609192	0.274763	-0.151138	0.0688338	-0.631413	0.451925
RECQL4	ATP-dependent DNA helicase Q4	O94761	YPPQEAEQLSHQAAPGPR	877	1.71119	1.90541	1.79927	2.12694	1.73132	1.9068	1.07186	0.887842	1.60414	1.62558
UBR4	E3 ubiquitin-protein ligase UBR4	Q5T4S7	LFQLTEK	1434	1.44297	1.90512	1.18973	1.27754	1.25281	1.55856	2.01896	1.51781	3.08869	4.33417
SPTAN1	Spectrin alpha chain, non-erythrocytic 1	Q13813	VNEVNQFAAK	205	0.921316	1.90434	0.0423712	0.063659	0.774938	1.6281	-0.156421	0.146693	0.204038	0.225037
PPP1R10	Serine/threonine-protein phosphatase 1 regulatory subunit 10	Q96QC0	YNLKPIPLKR	236	1.62895	1.90397	0.936682	0.414365	1.16238	1.23724	1.53523	1.87967	1.30189	1.48922
COPB2	Coatomer subunit beta'	P35606	CIAVHPTQPFILTSSDDMLIK	104	2.3065	1.90385	2.07215	1.3533	0.550955	0.695285	1.92383	1.05877	0.670556	1.30553
TUBB4B	Tubulin beta-4B chain	P68371	KLAVNMVPFPRLHFFMPGFAPLTSR	252	-0.778398	1.90379	0.951193	0.525729	1.05837	0.633557	-0.364301	0.441656	1.88755	1.00845
MPZL1	Myelin protein zero-like protein 1	O95297	AASAGAGAVIAAPDSR	2	1.79525	1.90352	0.575931	0.342598	-0.0579703	0.0368041	-0.154891	0.122323	0.619661	0.663165
SNAPC4	snRNA-activating protein complex subunit 4	Q5SXM2	YGEQDWFK	419	1.02288	1.90328	0.834826	1.37558	0.353252	0.463631	0.0650387	0.0656276	0.303847	0.36136
OGA	Protein O-GlcNAcase	O60502	FEEMCGLVMGMFTR	614	-0.535333	1.90272	-0.0587704	0.0803075	-0.313977	0.605039	-0.183064	0.361532	-0.655922	1.39647
CCT5	T-complex protein 1 subunit epsilon	P48643	ISDSVLVDIKDTEPLIQTAK	151	-0.30482	1.90256	-0.0544272	0.274882	0.0800973	0.370756	-0.305635	1.2434	-0.091138	0.375295
NAE1	NEDD8-activating enzyme E1 regulatory subunit	Q13564	EHFQSYDLDHMEKK	194	-0.968808	1.9017	-0.198907	0.228045	-0.190414	0.208606	-0.834825	0.619773	-0.0444159	0.0441517
BRD8	Bromodomain-containing protein 8	Q9H0E9	NIENGLIR	760	-0.333894	1.90159	-0.218893	2.26757	-0.270293	1.756	-0.838569	0.693462	-0.432903	1.5769
MRPS5	Small ribosomal subunit protein uS5m	P82675	GLHVVEIR	367	0.362746	1.90048	-0.0586458	0.14528	-0.126062	0.390182	-0.05133	0.146605	-0.224009	0.66706
PLEKHG3	Pleckstrin homology domain-containing family G member 3	A1L390	TFFLFDKTLLITK	319	-1.2428	1.90032	-0.915082	0.745487	-0.473191	0.485053	-0.616153	0.613438	-1.16684	1.66359
MACROD1	ADP-ribose glycohydrolase MACROD1	Q9BQ69	AKITGGYR	210	-0.984375	1.89932	-1.22931	1.13169	-0.216876	0.336996	-1.62431	1.92635	-0.725398	0.864159
ARHGEF1	Rho guanine nucleotide exchange factor 1	Q92888	KNWCALITETAGSLK	749	1.34864	1.89864	0.955976	1.78446	0.840038	1.31669	0.818733	1.0678	1.0931	1.66404
MAP4	Microtubule-associated protein 4	P27816	MDLAPSKDMGPPK	362	-1.68027	1.89851	-0.942224	0.72231	-0.404081	0.256345	-0.929744	0.703957	0.337735	0.532752
TBC1D4	TBC1 domain family member 4	O60343	TTLPMLPWLMAEIR	50	-1.37728	1.8985	-0.510113	0.483228	-0.240136	0.232408	-0.0952713	0.0591775	-0.808072	0.838809
CKAP2L	Cytoskeleton-associated protein 2-like	Q8IYA6	VGPGPTAAAAVEER	2	-0.432536	1.89802	-0.301515	2.52737	-0.164453	0.996576	-0.201306	1.11396	-0.457571	3.46193
WDR59	GATOR2 complex protein WDR59	Q6PJI9	SLSALSAYHTGLIAPMK	572	1.18915	1.89797	1.41756	1.88502	1.59838	2.74276	1.71096	2.2408	1.54475	1.63261
ZNHIT6	Box C/D snoRNA protein 1	Q9NWK9	FLEDVAR	280	0.380928	1.89765	0.0979053	0.324458	0.0149921	0.0380093	-0.209872	0.51379	-0.161434	0.527516
DNTTIP2	Deoxynucleotidyltransferase terminal-interacting protein 2	Q5QJE6	NLSELQDTSLQQLVSQR	322	0.337511	1.89696	0.0152444	0.0389232	0.0476719	0.190733	-0.0844919	0.343226	-0.0631369	0.215982
INTS2	Integrator complex subunit 2	Q9H0H0	EVQCLICCLLHQMYIADPNIAK	992	-1.46762	1.89562	-0.743662	0.813757	-1.01026	1.3193	-1.21287	1.46592	-0.577239	0.491931
TRIM25	E3 ubiquitin/ISG15 ligase TRIM25	Q14258	GISTKPVYIPEVELNHK	316	-0.540347	1.89474	-0.29107	1.12481	-0.0849995	0.302586	-0.240609	0.992563	-0.00287577	0.00809125
KDM6A	Lysine-specific demethylase 6A	O15550	TQLLQPADENWDPTGTKK	1002	-0.798646	1.89321	0.179062	0.455783	0.0627279	0.100993	-0.108313	0.15488	-0.97586	1.30858
AUH	Methylglutaconyl-CoA hydratase, mitochondrial	Q13825	LAIIPGGGGTQRLPR	212	0.260695	1.89284	0.128817	0.641316	0.233621	1.67476	0.0851182	0.354551	0.167137	0.957284
SRRT	Serrate RNA effector molecule homolog	Q9BXP5	TQLWASEPGTPPLPTSLPSQNPILK	535	-0.823066	1.89244	-0.302413	0.813816	0.259085	0.532015	-0.903994	0.834786	0.0332112	0.0428585
PRKDC	DNA-dependent protein kinase catalytic subunit	P78527	TQMTSAVR	206	-1.65449	1.89233	1.13645	1.33975	-0.125383	0.0573307	0.989868	1.11281	1.75393	2.27979
AHR	Aryl hydrocarbon receptor	P35869	LSVSYLR	72	-0.287392	1.89226	-0.081579	0.470451	-0.213248	1.47115	-0.0821727	0.299082	-0.058249	0.260815
URGCP	Up-regulator of cell proliferation	Q8TCY9	SQLLNAVLSPGHR	276	-0.415803	1.89194	-0.0711421	0.239246	-0.0900724	0.239233	-0.223037	0.473095	0.0544982	0.12527
LRRFIP2	Leucine-rich repeat flightless-interacting protein 2	Q9Y608	LAGEKEELLSQIR	573	-1.88591	1.89151	0.223991	0.152897	-0.716631	0.54005	-0.551658	0.445613	0.353268	0.190972
MED30	Mediator of RNA polymerase II transcription subunit 30	Q96HR3	EVNTASLCR	27	-2.33183	1.89123	-2.01239	1.58742	-1.80279	1.89813	-2.07252	1.77008	-0.749539	0.432485
DNAJB1	DnaJ homolog subfamily B member 1	P25685	TIPVVFKDVIRPGMR	280	-0.381624	1.89116	0.134334	1.04733	0.0975965	0.498976	0.26313	2.30575	0.211077	1.31819
TSEN34	tRNA-splicing endonuclease subunit Sen34	Q9BSV6	HHSLALTSFKR	78	-0.483547	1.89056	-0.181892	0.424583	0.00500407	0.0103175	-0.0138121	0.0279051	-0.591271	0.587313
RAB3GAP2	Rab3 GTPase-activating protein non-catalytic subunit	Q9H2M9	NITQTLMDTLK	611	-0.43625	1.88826	-1.42947	0.565713	0.164557	0.257617	0.00686691	0.00547814	0.222968	1.07548
AHNAK	Neuroblast differentiation-associated protein AHNAK	Q09666	FKMPEMSIK	14	-0.738078	1.88703	-0.230813	0.321735	-0.0661535	0.0862371	-0.242394	0.312598	-1.04122	0.893244
AKAP8L	A-kinase anchor protein 8-like	Q9ULX6	AVLSERDLYR	132	-1.34104	1.88657	-0.742871	0.466745	-1.70902	1.91402	-0.810208	0.692716	-0.356834	0.320239
VAPA	Vesicle-associated membrane protein-associated protein A	Q9P0L0	RLQGEMMK	181	1.93144	1.88549	1.64141	1.16242	0.762204	0.385598	1.54713	1.08003	1.01211	0.488825
CENPE	Centromere-associated protein E	Q02224	DNETTKIVSEMEQFKPK	1396	-1.23798	1.88523	-0.282991	0.389525	-0.324822	0.286655	0.0730271	0.0267585	-0.541867	0.432388
CUEDC1	CUE domain-containing protein 1	Q9NWM3	WKQYLEDER	227	-0.439779	1.88444	0.0311053	0.106126	-0.0149921	0.0282119	0.0684546	0.29007	0.0151992	0.0525745
MYO6	Unconventional myosin-VI	Q9UM54	LQQFFNER	480	-0.813344	1.88434	-0.267626	0.756382	-0.476632	0.964961	-0.02809	0.0514112	0.192798	0.5233
SEPTIN9	Septin-9	Q9UHD8	APVDFGYVGIDSILEQMR	272	-1.80655	1.88206	-0.295707	0.174878	-0.41055	0.23751	0.329633	0.270061	-0.349241	0.179161
MACF1	Microtubule-actin cross-linking factor 1, isoforms 1/2/3/4/5	Q9UPN3	IQEELNSR	4550	-1.24708	1.88187	-2.11481	1.16182	-0.69353	0.777434	-0.465488	0.501116	-0.621428	0.665597
CDAN1	Codanin-1	Q8IWY9	EFVPFLLNFLR	48	2.09837	1.87976	-0.731502	0.63224	0.170536	0.0952263	0.447507	0.40027	0.776969	0.499037
COPA	Coatomer subunit alpha	P53621	RLLELGPKPEVAQQTR	1127	-1.67167	1.87896	-0.20341	0.117532	0.0632956	0.0323719	0.134299	0.0561858	0.816434	0.622568
LYSMD3	LysM and putative peptidoglycan-binding domain-containing protein 3	Q7Z3D4	RVNNLISDQDFFALR	91	-0.989911	1.87888	-0.608124	1.83361	-0.405534	1.14244	-0.470863	1.14084	-0.463769	1.21512
MTCL2	Microtubule cross-linking factor 2	O94964	LTMLPQVGKDGVLR	1587	0.969413	1.87853	0.125111	0.0955322	1.66544	3.25019	1.45458	2.27587	0.965441	1.32451
DNAAF5	Dynein axonemal assembly factor 5	Q86Y56	RAVASVVGGWLLCLR	263	-1.04279	1.8785	-0.0331348	0.0268023	-0.332964	0.268452	-0.00880118	0.0087772	-0.121922	0.111537
NELFA	Negative elongation factor A	Q9H3P2	LCFHGLSSAVK	43	0.474915	1.87814	0.128536	0.333229	0.366973	1.10329	0.316098	0.936273	0.3211	0.872207
LRRC14	Leucine-rich repeat-containing protein 14	Q15048	ELSMGSSLLSGR	288	1.56244	1.87797	1.00631	1.18079	1.50038	1.74027	1.7901	1.5062	1.80566	2.62788
INTS2	Integrator complex subunit 2	Q9H0H0	YAFFMPTLPSLVSFCR	1097	0.6935	1.87727	0.141709	0.179438	0.175419	0.249272	-0.058041	0.0610606	0.330236	0.600552
APPL2	DCC-interacting protein 13-beta	Q8NEU8	LIDPQTQVSR	546	-0.175522	1.87711	0.0883587	0.527976	0.02501	0.144766	0.0483842	0.335543	0.0129024	0.0718034
GIT2	ARF GTPase-activating protein GIT2	Q14161	GSRPMSMYETGSGQKPYLPMGEASRPEESR	509	-0.646067	1.87642	-0.253888	0.64305	-0.692611	1.51223	-0.803304	1.15845	-0.767458	1.85064
XRCC3	DNA repair protein XRCC3	O43542	LVVIDSVAAPFRCEFDSQASAPR	209	1.09689	1.87384	1.39129	3.67379	0.784356	0.578907	1.18261	2.83502	0.968274	1.94099
NUP35	Nucleoporin NUP35	Q8NFH5	CALSSPSLAFTPPIK	255	0.255794	1.87302	-0.0841471	0.306328	-0.058837	0.224965	-0.0150401	0.0482616	-0.0324141	0.0908649
USP7	Ubiquitin carboxyl-terminal hydrolase 7	Q93009	HCTNAYMLVYIR	509	1.35879	1.87264	0.101822	0.102698	0.635754	0.925881	1.27854	2.13567	0.885744	1.45755
SORBS2	Sorbin and SH3 domain-containing protein 2	O94875	SFTSSSPSSPSR	294	0.339391	1.87137	0.304612	1.71321	0.207345	0.79153	0.243354	1.31117	0.121899	0.347707
GTF2B	Transcription initiation factor IIB	Q00403	EITTMADR	120	-0.422521	1.87108	-0.135004	0.363722	-0.0918208	0.290885	-0.0757493	0.223866	-0.214065	0.966939
CCNT2	Cyclin-T2	O60583	MSLDKYR	434	-0.763252	1.87095	0.118373	0.336783	0.130932	0.522062	0.31468	0.87025	0.238569	0.746094
URGCP	Up-regulator of cell proliferation	Q8TCY9	GMGSFREDSVVLSR	246	1.1083	1.87035	0.343845	0.188317	0.406283	0.48777	0.654136	0.722261	0.424095	0.421876
LIMCH1	LIM and calponin homology domains-containing protein 1	Q9UPQ0	QDNGSIEINIK	607	1.46621	1.86962	0.493622	0.367987	0.036518	0.0248603	0.980527	1.18992	0.306732	0.204954
DPF2	Zinc finger protein ubi-d4	Q92785	ILEPDDFLDDLDDEDYEEDTPKR	157	2.07767	1.86897	0.164409	0.0933948	0.228059	0.146736	-0.202276	0.12587	-0.0161354	0.00873614
NARS1	Asparagine--tRNA ligase, cytoplasmic	O43776	CFRDHFFDR	255	0.336595	1.86894	0.0683401	0.352316	-0.0206698	0.0572351	0.185527	0.591399	0.216569	1.34071
PPFIBP1	Liprin-beta-1	Q86W92	TSLETQKLDLMAEISNLK	163	-1.78696	1.8688	-1.08744	0.703431	-1.96664	2.74478	-0.144897	0.0993323	-1.35873	1.16086
MAK16	Protein MAK16 homolog	Q9BXY0	ALIAAQLDNAIEK	152	-1.80758	1.86689	-1.09394	1.43366	-1.11098	1.51923	-1.24961	1.44124	-2.1396	2.05113
CARHSP1	Calcium-regulated heat-stable protein 1	Q9Y2V2	ASQGPVYK	57	1.5858	1.86602	0.649476	0.942368	2.19241	1.48214	-0.129857	0.162435	2.24181	1.38561
ASAP2	Arf-GAP with SH3 domain, ANK repeat and PH domain-containing protein 2	O43150	NGFLTISHGTANRPPAK	332	0.677955	1.86413	0.718622	2.0472	0.616089	1.19213	0.290922	0.341019	0.536206	1.09144
KCTD3	BTB/POZ domain-containing protein KCTD3	Q9Y597	AVPENGNLGPIQAEVK	683	-0.683331	1.86369	-0.228006	0.301226	-0.211912	0.752137	-0.0930449	0.159557	-0.768363	2.17055
PRKAA1	5'-AMP-activated protein kinase catalytic subunit alpha-1	Q13131	TSCGSPNYAAPEVISGR	183	0.141282	1.86346	0.0534925	0.533088	0.0453852	0.500429	0.0778264	1.02746	0.030048	0.227018
ALDOA	Fructose-bisphosphate aldolase A	P04075	PYQYPALTPEQK	2	-1.23296	1.86329	-0.106892	0.122119	0.252646	0.62848	0.0584508	0.0603333	0.127026	0.158351
LLPH	Protein LLP homolog	Q9BRT6	METDIKR	75	-1.49229	1.86308	-0.566655	0.682152	-0.539906	0.727499	-0.793804	1.40134	-0.780047	0.896636
LRWD1	Leucine-rich repeat and WD repeat-containing protein 1	Q9UFC0	FMATLGPEEEAEKAQADFVK	152	-0.628188	1.86301	-0.143569	0.345764	0.0863183	0.215838	-0.413416	1.57412	-0.80967	1.14213
EEF1A1	Elongation factor 1-alpha 1	P68104	DGNASGTTLLEALDCILPPTRPTDKPLRLPLQDVYK	220	-0.902629	1.86286	-0.0639687	0.0835653	-0.043921	0.088894	-0.0883611	0.15495	-0.204937	0.242469
BYSL	Bystin	Q13895	VLDALVFHFLGFRTEK	356	-0.95436	1.86269	0.551073	0.973623	-0.541584	0.4239	-0.124822	0.119347	0.122214	0.133067
TCAF1	TRPM8 channel-associated factor 1	Q9Y4C2	SRANIALWPPVR	796	-1.69998	1.86141	0.252705	0.187255	0.278928	0.218009	0.263814	0.214035	0.243423	0.179936
TERF2IP	Telomeric repeat-binding factor 2-interacting protein 1	Q9NYB0	SPSSVTGNALWK	154	0.198189	1.86127	0.0851361	0.762267	0.0853402	0.569335	0.0824035	0.464818	-0.142926	0.384725
USO1	General vesicular transport factor p115	O60763	IGKENFIEK	572	-2.36928	1.86084	-0.102512	0.0401849	-0.828631	0.360563	0.135354	0.0568066	0.415911	0.223898
ZW10	Centromere/kinetochore protein zw10 homolog	O43264	QLQEFSTAIEEYNCALTEKK	111	0.273884	1.86083	-0.0657506	0.170049	0.0369823	0.146514	0.142336	0.778791	0.0638842	0.248413
AFF1	AF4/FMR2 family member 1	P51825	IFAVLCMR	1046	-1.06689	1.86066	-0.147087	0.190848	-0.0254487	0.0306605	-0.239568	0.212885	-0.461181	0.414806
PARP4	Protein mono-ADP-ribosyltransferase PARP4	Q9UKK3	ALNENLQDTVEK	760	-0.90769	1.86048	-1.12105	0.903234	-1.0041	0.876199	-0.932915	0.938276	-0.694126	0.92753
USP54	Inactive ubiquitin carboxyl-terminal hydrolase 54	Q70EL1	TLPLHSRDWEIESTSSESK	547	-1.15314	1.85982	0.0162201	0.0184054	0.0868425	0.172262	-0.0162414	0.0271957	-0.885079	0.75518
DDX21	Nucleolar RNA helicase 2	Q9NR30	DSEDNPQTLLFSATCPHWVFNVAK	364	0.418945	1.85976	0.100965	0.327704	-0.0601344	0.189107	0.146336	0.583939	0.404343	0.858558
WARS1	Tryptophan--tRNA ligase, cytoplasmic	P23381	PNSEPASLLELFNSIATQGELVR	2	1.93885	1.85969	0.472309	0.243098	0.1758	0.0771386	-0.398488	0.148891	1.14953	0.839525
KMT2D	Histone-lysine N-methyltransferase 2D	O14686	IIIISSR	5494	0.165326	1.85952	0.0154705	0.0769213	0.129063	1.03608	0.0232705	0.0745946	0.18194	2.29572
PPP1R12C	Protein phosphatase 1 regulatory subunit 12C	Q9BZL4	SPVQLEEAPFSRR	407	0.789999	1.8582	0.748647	1.70293	0.445448	0.687511	-0.0642528	0.0453607	0.603819	1.41113
KNTC1	Kinetochore-associated protein 1	P50748	TLVNNLR	687	0.4344	1.85595	0.46257	1.91699	0.408241	1.79092	0.277166	0.561656	0.556426	2.50387
MAPK1	Mitogen-activated protein kinase 1	P28482	ELIFEETAR	345	-2.80184	1.85502	-0.816713	0.421367	-2.24956	1.08443	-1.59651	0.988353	-1.43868	0.786797
TJP1	Tight junction protein ZO-1	Q07157	EAGFLRPVTIFGPIADVAREK	640	1.21389	1.85453	0.825915	1.55593	1.04657	1.95636	0.387823	0.74564	1.61838	1.44563
PBX1	Pre-B-cell leukemia transcription factor 1	P40424	MVSIIHRK	200	-2.23082	1.85429	-0.0161196	0.00739687	-0.142371	0.0813767	-0.431271	0.313905	-1.10579	0.519389
SIPA1L3	Signal-induced proliferation-associated 1-like protein 3	O60292	QKPEPLWHVPAQAR	1218	0.259697	1.85309	-0.0913297	0.354303	-0.00210004	0.00826444	0.0468078	0.223351	-0.0260286	0.0493519
USP34	Ubiquitin carboxyl-terminal hydrolase 34	Q70CQ2	IEEMSPELK	1990	-1.2983	1.85251	-0.680277	0.865399	-0.343109	0.25924	0.195284	0.198633	-0.587332	0.624727
ARAP1	Arf-GAP with Rho-GAP domain, ANK repeat and PH domain-containing protein 1	Q96P48	AEAGDAALSVAEWLR	2	2.53184	1.85196	0.5295	0.168757	-0.940777	0.333172	-0.218183	0.065308	1.63835	0.999074
PRRC2C	Protein PRRC2C	Q9Y520	SIQTPQSHGTLTAELWDNK	1977	0.140823	1.85192	0.0581897	0.709676	0.0743315	0.740053	0.0339341	0.335186	-0.0542868	0.150084
TSR1	Pre-rRNA-processing protein TSR1 homolog	Q2NL82	AKEELIFHCGFR	610	1.23148	1.85135	0.697297	0.529932	0.881788	0.688002	1.71669	2.7889	2.06758	3.42744
CENPF	Centromere protein F	P49454	LSSTQEEVHQLRR	2107	-0.65534	1.85123	-0.311821	0.670751	0.088835	0.148934	-0.284812	0.543331	-0.0987791	0.197355
SART3	Squamous cell carcinoma antigen recognized by T-cells 3	Q15020	SVEGRPMFVSPCVDKSK	769	-0.804267	1.85004	-0.0106905	0.0172494	-0.00325409	0.00427656	0.192536	0.325624	-0.0655339	0.0675775
SIPA1L1	Signal-induced proliferation-associated 1-like protein 1	O43166	GSVLEDAIPSTAK	549	0.423429	1.84989	0.112555	0.292986	0.329756	1.43317	0.290309	1.13413	0.231513	0.772564
LPIN2	Phosphatidate phosphatase LPIN2	Q92539	GTILPRGPLMLSPSSLFSAFHR	755	-1.46239	1.84967	-0.0874627	0.0609786	-1.0521	0.907872	-0.725019	0.663225	-0.720468	0.577357
HID1	Protein HID1	Q8IV36	GFFWSTVPGAGR	116	-0.491456	1.84953	-0.167937	0.465621	0.194849	0.485736	0.0395073	0.0523035	0.0870894	0.209182
MAP3K4	Mitogen-activated protein kinase kinase kinase 4	Q9Y6R4	GQENTSGFWLNR	248	-1.13349	1.84908	-1.53305	1.34157	-0.207367	0.349458	-0.369687	0.664446	-1.0862	0.916616
ELP3	Elongator complex protein 3	Q9H9T3	VVAHMMPDLPNVGLER	281	-0.927884	1.84853	0.0188081	0.0229666	0.180349	0.360586	0.0413711	0.0604567	-1.44688	1.63348
CMPK1	UMP-CMP kinase	P30085	FLIDGFPRNQDNLQGWNK	89	0.344587	1.84847	-0.168045	0.426221	-0.122203	0.308889	-0.0374171	0.0732528	-0.760912	1.6495
PPP2R1B	Serine/threonine-protein phosphatase 2A 65 kDa regulatory subunit A beta isoform	P30154	VLELDSVKSEIVPLFTSLASDEQDSVR	207	1.07057	1.84841	-0.0844111	0.0430706	0.0395531	0.0296108	0.62108	0.766081	-0.332	0.178568
GRHL2	Grainyhead-like protein 2 homolog	Q6ISB3	KSDITYFKTMPDLHSQPVLFIPDVHFANLQR	462	-1.47397	1.84783	-0.668675	0.69688	-0.5594	0.791858	-0.193856	0.224485	-0.452609	0.596346
HNRNPUL2	Heterogeneous nuclear ribonucleoprotein U-like protein 2	Q1KMD3	VTELRSELQR	8	0.936956	1.84748	0.265906	0.270248	-0.0122177	0.00947555	-0.0322215	0.0228607	-0.356344	0.230994
EIF2S1	Eukaryotic translation initiation factor 2 subunit 1	P05198	NECVVVIR	68	0.985299	1.84745	0.181922	0.194648	0.370069	0.494293	-0.509794	0.577811	0.613279	0.753255
LRRC14	Leucine-rich repeat-containing protein 14	Q15048	YFLAQMGR	275	-0.648756	1.84708	0.0638822	0.128946	0.0279018	0.0607935	0.190176	0.51055	0.340478	0.93826
NCOA2	Nuclear receptor coactivator 2	Q15596	MNSPSQSSPGMNPGQPTSMLSPR	467	-1.20362	1.84648	0.162402	0.127457	-0.193714	0.138033	0.213187	0.243574	0.219997	0.228366
LARS2	Leucine--tRNA ligase, mitochondrial	Q15031	ADLEGSLDSK	364	0.280756	1.84589	0.0662727	0.345997	-0.0968781	0.46824	-0.00699803	0.0248832	0.0699532	0.243693
UBR3	E3 ubiquitin-protein ligase UBR3	Q6ZT12	SIQDLIK	1391	1.53303	1.84578	1.11504	1.17237	1.00795	1.10491	1.47435	1.81533	1.78931	2.25406
SPINT2	Kunitz-type protease inhibitor 2	O43291	SIHDFCLVSK	33	-0.959093	1.84558	-0.724094	1.19825	-0.45834	0.555868	-0.07483	0.0774813	-0.789605	1.18542
SEPTIN5	Septin-5	Q99719	MKDEELR	347	1.18261	1.84462	0.347975	0.35064	1.11988	1.52594	0.167553	0.163538	1.29179	1.40174
INTS13	Integrator complex subunit 13	Q9NVM9	NDPLPISTVGTR	508	0.852366	1.84424	0.0437657	0.0617354	0.356531	0.236666	-0.106446	0.0564139	-0.189242	0.0805664
MTRR	Methionine synthase reductase	Q9UBK8	DRDYLFR	584	-1.29619	1.84385	-1.33228	1.27571	-1.11419	1.42557	-1.14825	1.35207	-0.501414	0.653007
SMARCAD1	SWI/SNF-related matrix-associated actin-dependent regulator of chromatin subfamily A containing DEAD/H box 1	Q9H4L7	LIESTSTMDGAIAAALLMFGDAGGGPR	180	-1.6116	1.8427	-0.185513	0.128886	0.107889	0.157289	-0.143113	0.0795064	-0.0960053	0.057186
NRK	Nik-related protein kinase	Q7Z2Y5	HVVESLTR	321	-0.947019	1.8417	-0.148466	0.331611	-0.435126	0.338928	-0.647261	0.304987	-1.16563	0.79763
HEATR1	HEAT repeat-containing protein 1	Q9H583	EGEEEQAINR	1658	-2.20061	1.8415	1.1421	0.642683	1.14776	0.581152	1.91533	1.8122	0.242059	0.0834334
TSEN54	tRNA-splicing endonuclease subunit Sen54	Q7Z6J9	FWQTMGFSEQGR	98	-1.16894	1.8414	0.250879	0.50208	-0.138046	0.211808	0.403845	0.941461	8.01183e-05	9.023e-05
NAA40	N-alpha-acetyltransferase 40	Q86UY6	FLIQILQLMANSTQMK	154	1.11788	1.84121	0.0686902	0.041411	0.25136	0.153	0.431075	0.424226	1.12777	1.9562
CHD8	Chromodomain-helicase-DNA-binding protein 8	Q9HCK8	EFTVQIKDEEGLK	2250	0.796863	1.84119	0.113798	0.096914	0.276839	0.307211	0.0208474	0.0137234	-0.0621419	0.0695043
NVL	Nuclear valosin-containing protein-like	O15381	VFSIISSEK	62	1.47196	1.8411	-1.63945	0.636944	-0.714124	0.502648	-0.179093	0.148983	-0.641898	0.505896
ANXA1	Annexin A1	P04083	KALTGHLEEVVLALLK	98	0.972891	1.84093	0.789515	1.39539	0.829166	1.60143	0.403016	0.559033	0.598645	0.834723
USP32	Ubiquitin carboxyl-terminal hydrolase 32	Q8NFA0	IQDEQHLVIEVR	692	0.421651	1.84057	0.041197	0.115618	-0.119192	0.274688	-0.173639	0.528597	-0.0603593	0.174148
ATP2A3	Sarcoplasmic/endoplasmic reticulum calcium ATPase 3	Q93084	KAEIGIAMGSGTAVAK	713	-1.76278	1.8405	-0.404988	0.257294	-0.158055	0.109324	-0.559023	0.293864	0.525672	0.505636
KMT2D	Histone-lysine N-methyltransferase 2D	O14686	SEAGHLLLQK	4456	-0.84027	1.84034	-0.0349757	0.0602972	-0.00310973	0.00457176	0.14871	0.30261	-0.0661367	0.12688
MRPS31	Small ribosomal subunit protein mS31	Q92665	IEPLSPELVAAASAVADSLPFDK	148	2.12122	1.84013	0.486102	0.197563	-0.481868	0.226732	-0.538732	0.239654	1.27069	0.903768
ILKAP	Integrin-linked kinase-associated serine/threonine phosphatase 2C	Q9H0C8	EEMQDAHVILNDITEECRPPSSLITR	119	-1.74901	1.83992	-1.1661	0.755313	-1.43502	1.4167	-1.09771	0.663205	0.1535	0.0766187
CDK5RAP3	CDK5 regulatory subunit-associated protein 3	Q96JB5	NVNYEIPSLK	121	1.10989	1.83984	0.38186	0.480628	0.557633	0.700776	-0.555932	0.353739	1.07275	1.29915
GCA	Grancalcin	P28676	LSPQTLTTIVKR	155	-0.321203	1.83979	-0.12402	0.433747	0.0261301	0.0550734	-0.227864	0.697452	-0.275305	1.17982
RRBP1	Ribosome-binding protein 1	Q9P2E9	GEPGPPDADGPLYLPYK	635	0.856736	1.83833	0.576369	0.916957	0.372234	0.614221	0.136568	0.129525	0.477844	0.777341
NAE1	NEDD8-activating enzyme E1 regulatory subunit	Q13564	LADVLWNSQIPLLICR	139	0.369003	1.83823	0.140366	0.50549	-0.0356652	0.09432	0.279309	1.34563	0.169858	0.461942
PRUNE1	Exopolyphosphatase PRUNE1	Q86TP1	QTAALLHGTIILDCVNMDLK	167	-1.2935	1.83817	-0.549227	0.428858	-0.061514	0.0674091	0.0133788	0.0143734	-0.158625	0.196279
SSH3	Protein phosphatase Slingshot homolog 3	Q8TE77	GAVLGLQDGGDNDDAAEASSEPTEK	43	-1.04149	1.83805	0.495174	0.427333	0.586016	0.902393	0.805291	0.897459	-0.43654	0.535567
IQGAP1	Ras GTPase-activating-like protein IQGAP1	P46940	YMNPAIVAPDAFDIIDLSAGGQLTTDQR	1195	-1.35236	1.83789	-1.10831	1.1498	-0.956357	1.5373	-1.21741	2.71606	-1.08503	1.26032
SEPTIN7	Septin-7	Q16181	LKDSEAELQRR	372	0.161306	1.83693	-0.0321084	0.21694	-0.0307412	0.126825	-0.016779	0.0630918	0.0414991	0.206805
MTCL2	Microtubule cross-linking factor 2	O94964	QVLQTELERPR	346	-1.82456	1.83666	-1.96798	2.00644	-2.03501	2.00965	-2.49156	2.68377	-2.101	1.8042
AP1G2	AP-1 complex subunit gamma-like 2	O75843	LLYVHMLGYPAHFGQMECLK	54	1.00425	1.83643	-0.44531	0.35224	-0.244224	0.154472	-0.35746	0.404431	0.368091	0.373114
MTCL2	Microtubule cross-linking factor 2	O94964	TVSVGLQTDPPR	1385	1.39343	1.83612	0.831103	0.81348	0.988297	1.25559	0.0891299	0.079228	-0.305081	0.280354
TRIP12	E3 ubiquitin-protein ligase TRIP12	Q14669	GLPPHLFGPLGPR	410	-0.295754	1.83491	-0.089987	0.994232	-0.142214	1.36482	-0.110836	1.07917	-0.240261	1.07997
INTS13	Integrator complex subunit 13	Q9NVM9	AELYQHLKEENGMETTENGK	683	-3.67838	1.83317	0.623387	0.423711	0.644959	0.439832	-0.277639	0.0824994	-0.411937	0.143978
HAUS3	HAUS augmin-like complex subunit 3	Q68CZ6	GDFDLQIAK	354	1.22013	1.83314	0.560948	0.800637	0.285645	0.292765	0.357349	0.419119	0.186087	0.195383
PPFIBP2	Liprin-beta-2	Q8ND30	FTGDTLAMLLNIPPQK	755	-0.917422	1.83284	-0.488128	0.671249	-0.502257	0.603571	-0.780735	1.54117	-0.372108	0.536666
GTF2I	General transcription factor II-I	P78347	KITINPGCVVVDGMPPGVSFK	896	-0.313643	1.83248	-0.0201188	0.0826588	-0.0625333	0.287745	-0.00288626	0.0160584	-0.288295	0.856055
WASHC2A	WASH complex subunit 2A	Q641Q2	EPQKPEQPTPR	429	-1.14649	1.83239	0.162792	0.146166	0.546244	0.742182	0.268784	0.271831	-0.23309	0.143171
ACADVL	Very long-chain specific acyl-CoA dehydrogenase, mitochondrial	P49748	FGMAAALAGTMR	342	-2.27614	1.83223	-0.741773	0.398721	-0.404327	0.256893	0.289111	0.323737	-0.760344	0.499697
SPAG7	Sperm-associated antigen 7	O75391	ADLLGSILSSMEKPPSLGDQETR	2	1.92146	1.83074	-0.206857	0.204195	-0.676943	0.842354	0.205279	0.111213	0.860206	0.594327
DLG5	Disks large homolog 5	Q8TDM6	DQVISELDKLQTEVELAESK	440	1.37418	1.82979	0.906831	1.1406	0.592112	0.51362	-1.32723	0.482654	0.465003	0.308524
HADH	Hydroxyacyl-coenzyme A dehydrogenase, mitochondrial	Q16836	FAAEHTIFASNTSSLQITSIANATTR	137	1.55137	1.82961	1.43256	1.38835	0.411649	0.445989	1.56946	1.18347	0.272464	0.259715
CHD1L	Chromodomain-helicase-DNA-binding protein 1-like	Q86WJ1	GSVLIPGLVEGSTK	617	-1.76525	1.82961	-0.0483549	0.0393289	0.16391	0.262421	-0.929141	0.474307	0.0268376	0.0370553
C2CD5	C2 domain-containing protein 5	Q86YS7	GNAVVGYLQCFDLEGESGLVVR	216	1.39775	1.82931	0.887543	0.759331	0.702828	0.880963	0.761448	0.702134	-0.338405	0.10231
GREB1	Protein GREB1	Q4ZG55	CHVHNFIILNVDLTQNVQYNQNR	1715	-1.5599	1.82878	-0.633223	0.549427	-0.919047	1.16522	-0.863755	0.951077	-1.31423	1.16606
TNKS1BP1	182 kDa tankyrase-1-binding protein	Q9C0C2	GWSQEGPVK	219	0.359239	1.82878	0.154776	0.399098	0.204707	0.430656	0.140252	0.474922	0.186134	0.435999
FAM120B	Constitutive coactivator of peroxisome proliferator-activated receptor gamma	Q96EK7	QVISTSSDAESR	327	0.906453	1.82697	0.0552841	0.0638464	0.237575	0.301519	0.0850942	0.0843246	0.214891	0.311398
NCAPD3	Condensin-2 complex subunit D3	P42695	CKLNGFQWSLEVISSAVDALQR	783	-1.68725	1.82647	-1.48946	0.809016	-0.978557	0.565664	-0.634958	0.343846	-1.36936	0.652863
SZT2	KICSTOR complex protein SZT2	Q5T011	LFNEHLVSASSNPALALR	369	0.776157	1.82623	0.0349575	0.0362536	0.100603	0.121305	-0.206322	0.177745	-0.00249256	0.00222588
DDX39A	ATP-dependent RNA helicase DDX39A	O00148	VNIVFNYDMPEDSDTYLHR	355	-0.297115	1.82567	-0.157278	0.575982	0.0375591	0.11974	-0.104033	0.276612	-0.0628457	0.13837
MDN1	Midasin	Q9NU22	LVFKEGVLIDAMR	1131	2.0977	1.82437	1.66531	1.5906	-0.0921483	0.0435542	1.22021	1.05287	0.640802	0.4531
SEPTIN2	Septin-2	Q15019	QQPTQFINPETPGYVGFANLPNQVHR	4	0.198113	1.82427	-0.0586295	0.233541	-0.0357471	0.122913	-0.0407586	0.185089	-0.130485	1.05538
PSME3	Proteasome activator complex subunit 3	P61289	IEDGNNFGVSIQEETVAELR	147	0.727503	1.82422	0.248078	0.4988	0.151162	0.261616	0.181627	0.302725	0.143419	0.166783
BIRC6	Baculoviral IAP repeat-containing protein 6	Q9NR09	DSDQFEWVTIEQSGELVYEAPETVAAEPPPIK	4113	1.88638	1.82419	0.596152	0.317096	1.97746	1.5325	0.795835	0.455531	0.785826	0.376115
DIAPH1	Protein diaphanous homolog 1	O60610	AEPHFLSILQHLLLVR	406	0.804625	1.82399	-0.377927	0.678144	-0.145228	0.0933223	0.139874	0.128648	0.45716	0.686966
DIP2C	Disco-interacting protein 2 homolog C	Q9Y2E4	GVLSMHGLTYGVIR	676	0.55017	1.82371	0.232869	0.568806	0.431778	0.93085	0.411753	1.05457	0.251273	0.428808
MTA3	Metastasis-associated protein MTA3	Q9BTC8	QAMQGMPVR	445	0.36002	1.82333	0.0653652	0.169089	-0.08933	0.215089	0.25764	1.06422	0.29827	1.36295
NOL11	Nucleolar protein 11	Q9H8H0	ESTSCPVVQKR	574	-1.12349	1.82298	-0.86619	0.685311	0.389411	0.441433	-0.129857	0.120044	-0.847576	1.01661
TAF8	Transcription initiation factor TFIID subunit 8	Q7Z7C8	QSTNPADNYHLAR	21	0.32213	1.82253	-0.046017	0.135125	0.0499649	0.164885	-0.0420847	0.0884293	0.0992621	0.283323
NOP14	Nucleolar protein 14	P78316	MKTEAELAKEEQEHLR	272	0.379681	1.82122	-0.242267	0.888858	-0.0232541	0.0501164	0.0206421	0.0360219	-0.145518	0.471315
UTP15	U3 small nucleolar RNA-associated protein 15 homolog	Q8TED0	VLDPTCTIK	380	-0.308131	1.82001	-0.17466	1.1036	-0.257406	1.89178	-0.172257	0.872087	-0.858385	0.511505
SIN3A	Paired amphipathic helix protein Sin3a	Q96ST3	LIQSIVR	1000	-1.06745	1.81939	-1.02556	1.59995	-0.535776	0.439138	-0.582651	0.510485	-0.324589	0.279223
PRMT3	Protein arginine N-methyltransferase 3	O60678	TLISEPCGIK	411	-0.944639	1.81926	-0.315812	0.410198	0.239356	0.212111	0.36963	0.532989	-0.156044	0.189248
MYCBP2	E3 ubiquitin-protein ligase MYCBP2	O75592	VREEWEHAISSK	3984	1.22387	1.81897	0.202307	0.159981	0.245343	0.186102	-0.343753	0.194879	1.0017	0.999428
EME1	Crossover junction endonuclease EME1	Q96AY2	SVLDHQNNEGASCDWK	121	0.509876	1.81814	0.498415	1.80405	0.530105	2.1806	0.403822	1.21868	0.325072	0.71223
EEF1E1	Eukaryotic translation elongation factor 1 epsilon-1	O43324	AAAAELSLLEK	2	0.189785	1.81812	0.224811	1.4381	0.118405	1.04091	0.192847	1.06145	0.161722	0.958101
ATXN2L	Ataxin-2-like protein	Q8WWM7	IAMENDDGRTEEEKHSAVQR	313	0.231523	1.81781	0.146291	1.07512	0.16318	1.18665	0.019676	0.0872929	0.0378534	0.162192
MTA1	Metastasis-associated protein MTA1	Q13330	YLETHPRPPKPDPVK	540	0.61695	1.81741	0.519331	1.50504	0.374855	0.93886	-0.0279405	0.0222821	-0.180476	0.153611
SMC6	Structural maintenance of chromosomes protein 6	Q96SB8	SLKIEAENKYDAIK	771	-1.10976	1.81701	-0.624563	0.946419	-0.333557	0.428812	-0.467606	0.472237	-0.947385	1.01235
ADO	2-aminoethanethiol dioxygenase	Q96SZ5	EREAVRPGVLR	161	0.475938	1.81696	0.00923147	0.0144472	0.22527	0.623569	0.0622795	0.125054	0.0913497	0.164017
POLR1E	DNA-directed RNA polymerase I subunit RPA49	Q9GZS1	AAETIIDTK	171	-0.3049	1.81678	-0.334683	1.25572	-0.260837	1.22636	-0.158122	0.885522	-0.137011	0.691442
KAT2A	Histone acetyltransferase KAT2A	Q92830	MDLQQPAANLSELCR	134	2.48631	1.81634	2.59963	1.87523	2.01379	1.40824	0.0617828	0.0191945	0.786407	0.332636
TAF6L	TAF6-like RNA polymerase II p300/CBP-associated factor-associated factor 65 kDa subunit 6L	Q9Y6J9	EATQNSSQFMK	46	0.784066	1.81552	0.422359	0.819306	0.439424	0.507863	0.33218	0.580987	0.491747	1.05482
DIDO1	Death-inducer obliterator 1	Q9BTC0	VTVDDLPNR	1439	0.192004	1.81548	0.100035	0.749096	0.183518	1.59098	0.0986415	0.649184	0.135406	0.8096
MED17	Mediator of RNA polymerase II transcription subunit 17	Q9NVC6	IMVQFPR	592	-2.22971	1.8154	-0.470901	0.558616	0.0584211	0.0792046	-0.255556	0.294	-0.413319	0.718973
KANSL2	KAT8 regulatory NSL complex subunit 2	Q9H9L4	LEGQEFCIK	40	1.51953	1.815	0.020773	0.0123185	0.557428	0.471734	0.406623	0.313805	-1.07107	0.709263
THAP12	52 kDa repressor of the inhibitor of the protein kinase	O43422	QNIPLDGHEADEIPEGLFTPDNFQALLECR	179	-1.1327	1.81485	-0.474238	0.747542	-0.48977	0.517464	-0.318155	0.435347	-0.420867	0.441858
NMD3	60S ribosomal export protein NMD3	Q96D46	LISQDIHSNTYNYK	226	0.177263	1.81456	-0.0309815	0.147893	0.00619679	0.0260867	0.034001	0.177604	-0.0222765	0.108676
CDK9	Cyclin-dependent kinase 9	P50750	ILQLLKHENVVNLIEICR	69	0.87238	1.81247	0.0259352	0.0258664	0.414425	0.695897	0.0272462	0.0257166	-0.349737	0.380258
SYNE2	Nesprin-2	Q8WXH0	AYSNAHGEAAAR	5389	1.13379	1.81167	0.684138	0.865136	0.741023	0.791977	0.323487	0.42472	0.494165	0.569586
FANCD2	Fanconi anemia group D2 protein	Q9BXW9	HTFVVFFR	1229	-0.394292	1.8112	-0.0530058	0.177792	0.0845841	0.715211	-0.0322633	0.122575	0.0429817	0.144607
METTL1	tRNA (guanine-N(7)-)-methyltransferase	Q9UBP6	NFPAIFR	251	-0.247787	1.81082	0.0104206	0.0566585	-0.419551	1.04805	0.099138	0.752361	-0.170997	0.352645
ABTB2	Ankyrin repeat and BTB/POZ domain-containing protein 2	Q8N961	VLLVTASNR	861	-3.90864	1.81031	1.2494	0.256959	1.61973	0.605442	1.32939	0.26461	-1.90907	0.443103
ACOT1	Acyl-coenzyme A thioesterase 1	Q86TX2	AESTFLFLVGQDDHNWKSEFYANEACK	314	-1.37361	1.8103	-0.390039	0.291179	-0.392612	0.336456	-0.549502	0.467537	-1.24527	1.43241
COG6	Conserved oligomeric Golgi complex subunit 6	Q9Y2V7	TNQQTAGLEIMEQMALLQETAYER	202	0.444327	1.80977	0.294133	0.810332	0.249708	0.743603	0.0595146	0.0951368	-0.0650439	0.128397
DDX19A	ATP-dependent RNA helicase DDX19A	Q9NUU7	EKVLVTTNVCAR	383	0.163216	1.80913	-0.0195747	0.126313	-0.0129915	0.0826634	0.0551691	0.445236	0.0372414	0.255052
CGN	Cingulin	Q9P2M7	GRDQVDQLR	995	0.77306	1.80913	-0.10245	0.11733	-0.287381	0.212811	0.108407	0.147689	0.420401	0.777205
ERCC5	DNA excision repair protein ERCC-5	P28715	QYEDEGGFLKEVESR	265	1.39028	1.80864	0.425034	0.367247	0.696758	0.572776	0.33075	0.18885	0.310157	0.199891
REEP6	Receptor expression-enhancing protein 6	Q96HR9	NLVTEVLGALEAK	16	-1.31263	1.80825	0.132422	0.09484	0.965722	1.06596	0.318557	0.255123	-0.371993	0.394894
EPG5	Ectopic P granules protein 5 homolog	Q9HCE0	LYPQLPAEIAGEAPALVAVKPLLR	215	-1.14532	1.808	-1.45764	2.14668	-0.867208	1.55159	-1.05741	2.2712	-0.10156	0.122353
MSN	Moesin	P26038	AKFYPEDVSEELIQDITQR	82	2.67983	1.80766	2.19036	1.15326	2.58526	1.37837	3.03961	1.27203	1.30387	0.567546
SPTAN1	Spectrin alpha chain, non-erythrocytic 1	Q13813	CTELNQAWSSLGK	1314	0.227562	1.80763	0.0759695	0.501914	-0.111781	0.299898	0.095769	0.7023	-0.0871868	0.267009
ERC1	ELKS/Rab6-interacting/CAST family member 1	Q8IUD2	NKVEQLKEELSSK	438	-2.15275	1.80726	0.469755	0.321166	0.884968	0.87916	0.644918	0.545328	1.0588	1.00364
UBR4	E3 ubiquitin-protein ligase UBR4	Q5T4S7	TVQAIVELK	3598	-0.831603	1.80721	-0.0786871	0.183778	0.0545344	0.110854	-0.0846389	0.1541	0.211971	0.531485
FOCAD	Focadhesin	Q5VW36	LLVENSQQTSGFALALGNIVHGLSVCGHGK	1218	-0.903064	1.8068	-0.157058	0.171518	-0.777344	0.722463	0.0617412	0.0636695	-1.48268	0.696745
DDX39A	ATP-dependent RNA helicase DDX39A	O00148	TAVFVLATLQQIEPVNGQVTVLVMCHTR	95	-1.41742	1.80666	-0.63921	0.652026	-0.901383	1.22747	-0.211052	0.152706	-0.91494	0.595294
GCN1	Stalled ribosome sensor GCN1	Q92616	IIIEDLLEATRSPEVGMR	2151	-0.235214	1.80613	-0.0767848	0.331907	-0.0389218	0.22548	-0.0610809	0.385558	0.234058	1.71313
PNISR	Arginine/serine-rich protein PNISR	Q8TF01	QKQEAFWR	421	0.399612	1.80571	-0.119161	0.300966	-0.102887	0.234513	-0.179931	0.321843	-0.262191	0.627466
CAPS	Calcyphosin	Q13938	QCHRDLALSQALWGWQLSK	2	-1.65944	1.80473	-0.733985	0.602466	-0.0914739	0.0531325	-0.33109	0.232606	-1.03021	0.86906
OPA1	Dynamin-like 120 kDa protein, mitochondrial	O60313	SPVKVTLSEGPHHVALFK	325	-0.773211	1.8044	0.175261	0.174614	0.850886	1.65393	0.752565	2.30625	0.444161	0.753766
SMCHD1	Structural maintenance of chromosomes flexible hinge domain-containing protein 1	A6NHR9	ISGALFTNDKFQVSTNK	509	1.09145	1.80428	0.44055	0.493633	0.412106	0.456324	-0.911696	0.866216	0.0240245	0.0202053
NOP14	Nucleolar protein 14	P78316	EDALELTEKLDQDWK	212	1.41906	1.80332	0.551892	0.425285	-0.337755	0.15802	1.17425	1.60185	1.31205	1.43829
RALY	RNA-binding protein Raly	Q9UKM9	VKTNVPVK	158	-1.07994	1.80157	0.164991	0.292137	-0.0249666	0.0230578	-0.799644	0.370528	0.110105	0.134467
USP47	Ubiquitin carboxyl-terminal hydrolase 47	Q96K76	VKGPVGSLK	859	-1.08005	1.80151	0.191909	0.353417	-0.0355374	0.0334469	-0.619086	0.336373	0.094078	0.113604
GCC1	GRIP and coiled-coil domain-containing protein 1	Q96CN9	DLELEQLR	600	-3.13289	1.80142	-1.34447	0.69742	-0.9298	0.378073	-0.365875	0.402847	0.0817737	0.0956075
C1orf53	Uncharacterized protein C1orf53	Q5VUE5	AARPSVSEELTAAER	63	-0.404944	1.80134	-0.788639	0.703152	-0.192534	0.403749	-0.1364	0.447532	0.00206479	0.00496465
PIAS2	E3 SUMO-protein ligase PIAS2	O75928	LFPLPGYAPPPK	238	-2.09296	1.80048	-0.35431	0.281488	-2.00621	2.03371	-1.68027	0.894009	-0.78604	0.725282
EIF3E	Eukaryotic translation initiation factor 3 subunit E	P60228	QVLKDLVK	272	0.907473	1.80029	1.26585	1.71036	0.0842074	0.0587516	-1.20468	0.32894	0.634773	0.441417
TNRC6C	Trinucleotide repeat-containing gene 6C protein	Q9HCJ0	EGSGGNAWDSGPPAGPGILAWGR	501	1.23367	1.80019	0.638536	0.504725	0.20706	0.131469	0.31835	0.308006	-0.0326058	0.0193003
DHX15	ATP-dependent RNA helicase DHX15	O43143	DYYINIR	684	-2.96291	1.79967	-1.13225	0.556487	-2.76513	1.1503	-1.18084	0.503231	-1.27165	0.532538
SRRT	Serrate RNA effector molecule homolog	Q9BXP5	LGSIAEIDLGVPPPVMK	134	-0.366219	1.79923	-0.347846	1.3185	-0.304152	0.803046	-0.563325	3.29277	-0.412617	1.89531
DLG5	Disks large homolog 5	Q8TDM6	TCSDYSEMR	1239	0.962979	1.7992	-0.264273	0.169737	0.306103	0.299288	-0.445795	0.344018	0.26942	0.273383
MRPL24	Large ribosomal subunit protein uL24m	Q96A35	ADGIVPETWIDGPKDTSVEDALER	162	0.235383	1.79851	0.028129	0.122902	-0.104545	0.566425	-0.211574	1.41446	-0.362191	1.74273
MCMBP	Mini-chromosome maintenance complex-binding protein	Q9BTE3	QAGSVGGLQWCGEPK	190	0.394548	1.79831	-0.101688	0.202222	0.161889	0.607159	0.300001	0.804276	0.159904	0.347323
GCC2	GRIP and coiled-coil domain-containing protein 2	Q8IWJ2	NDPLSSVKELEEK	940	-1.731	1.79816	1.29545	0.912441	0.516409	0.268783	1.40274	1.04063	1.26141	0.688221
NUP155	Nuclear pore complex protein Nup155	O75694	ESLKEYQK	899	1.33967	1.7979	0.699776	0.696702	0.659412	0.691565	1.38005	1.95767	1.05222	1.18241
CPSF6	Cleavage and polyadenylation specificity factor subunit 6	Q16630	GFALVGVGSEASSK	125	-0.116041	1.79772	-0.0669572	0.89963	-0.0469872	0.764022	-0.00172652	0.0177413	-0.101121	1.57888
MED4	Mediator of RNA polymerase II transcription subunit 4	Q9NPJ6	DGEFQELMK	73	-0.655821	1.79725	-0.268699	0.768647	-0.383544	1.39547	-0.576308	1.53655	-0.543344	1.13568
CDC26	Anaphase-promoting complex subunit CDC26	Q8NHZ8	SREQMINDR	56	-0.934901	1.79712	-0.280007	0.574209	0.0610702	0.117646	0.206002	0.476641	-0.318624	0.613094
BAIAP2	Brain-specific angiogenesis inhibitor 1-associated protein 2	Q9UQB8	QRPYSVAVPAFSQGLDDYGAR	488	0.25451	1.79705	-0.128561	0.74276	-0.134054	0.716835	-0.157041	0.948695	-0.0895283	0.427052
LRRC40	Leucine-rich repeat-containing protein 40	Q9H9A6	LLPALTVLDIHDNQLTSLPSAIR	103	0.277982	1.797	0.042444	0.230821	0.0585496	0.296352	-0.0484801	0.298174	-0.0786959	0.499436
RXRA	Retinoic acid receptor RXR-alpha	P19793	RIPHFSELPLDDQVILLR	285	-0.651397	1.79666	-0.304046	0.487217	-0.0737552	0.109138	-0.280367	0.484509	-0.0467453	0.100878
CDK5RAP2	CDK5 regulatory subunit-associated protein 2	Q96SN8	KVSDLIQLVK	656	-0.617009	1.79576	0.329449	0.504714	0.433847	0.975817	0.434528	0.296497	0.502104	1.14626
EIF4G1	Eukaryotic translation initiation factor 4 gamma 1	Q04637	EITKPLRPLGK	1361	-1.80347	1.79515	-1.70908	1.73993	-1.9242	1.9304	0.156775	0.0547991	0.368197	0.157539
LRPPRC	Leucine-rich PPR motif-containing protein, mitochondrial	P42704	MVFINNIALAQIKNNNIDAAIENIENMLTSENK	1177	1.32226	1.7926	0.247365	0.134214	-0.184293	0.0865733	-0.0795836	0.0477361	-1.00288	0.795462
ZNF485	Zinc finger protein 485	Q8NCK3	AQIQGPLTFGDVAVAFTR	5	0.366635	1.79174	-0.0974607	0.330362	0.0487515	0.168944	-0.107573	0.359406	0.0493776	0.142916
KANSL3	KAT8 regulatory NSL complex subunit 3	Q9P2N6	HHPSSPLPGSK	629	-1.45923	1.79153	-0.167932	0.110872	0.33619	0.334115	-0.0977055	0.0947272	-0.46617	0.476857
USP11	Ubiquitin carboxyl-terminal hydrolase 11	P51784	DGHYTTFACNK	886	0.738352	1.79133	-0.0196707	0.0134384	-0.515415	0.40842	-0.0459466	0.0530373	0.102008	0.110732
SRSF9	Serine/arginine-rich splicing factor 9	Q13242	FEDPRDAEDAIYGR	59	-1.75523	1.79125	0.0433488	0.0264225	0.0363295	0.0174485	0.341717	0.255899	0.316978	0.238344
CA5B	Carbonic anhydrase 5B, mitochondrial	Q9Y2D0	CFPAELHLVHWNAVR	149	1.76748	1.7911	1.24574	0.973476	1.72947	1.85579	1.20473	1.02681	2.01265	1.81872
EPRS1	Bifunctional glutamate/proline--tRNA ligase	P07814	NQGGGLSSSGAGEGQGPKK	992	-0.74394	1.79086	-0.2413	0.454397	0.0247236	0.0433383	-0.283165	0.706878	-0.108246	0.194344
TNKS1BP1	182 kDa tankyrase-1-binding protein	Q9C0C2	DTQSPSTCSEGLLGWSQK	709	0.217275	1.79049	0.08836	0.462235	0.0425546	0.238308	-0.000592302	0.00229765	-0.180481	0.546616
SPR	Sepiapterin reductase	P35270	TLAPLLASLLSPGSVLVLSAR	22	-2.73024	1.7902	0.149978	0.0993551	0.616296	0.603375	-0.539723	0.167966	-0.199676	0.142171
SCOC	Short coiled-coil protein	Q9UIL1	LKSENQVLGQYIENLMSASSVFQTTDTK	128	-1.49349	1.78954	-0.95007	1.10413	-1.02702	1.28097	-0.38862	0.433523	-1.5237	1.37662
PPM1F	Protein phosphatase 1F	P49593	ALTGSEDYLLLACDGFFDVVPHQEVVGLVQSHLTR	347	-1.16658	1.78937	-0.166123	0.167442	-0.0654657	0.0612066	0.0171969	0.0188558	-0.794354	0.956094
PRPF6	Pre-mRNA-processing factor 6	O94906	AGSVATCQAVMR	516	0.29869	1.78933	0.0513827	0.242595	0.131028	0.77688	0.111948	0.648239	0.0811698	0.419281
BLOC1S5	Biogenesis of lysosome-related organelles complex 1 subunit 5	Q8TDH9	LQAANDSVCR	109	-2.19912	1.7878	-0.381097	0.496292	-0.464161	0.362419	-0.9102	1.3015	-1.6942	2.97733
ETHE1	Persulfide dioxygenase ETHE1, mitochondrial	O95571	IMGNLNLPKPQQIDFAVPANMR	225	-2.03881	1.7878	-1.07134	0.864036	-0.918213	0.57675	-0.829064	0.658754	-0.796091	0.658021
VPS33A	Vacuolar protein sorting-associated protein 33A	Q96AX1	ILPGPHFEERQPLPTGLQK	517	0.826063	1.78724	0.339588	0.534472	-0.0210395	0.020365	0.00805037	0.00826342	0.206671	0.280036
UBOX5	RING finger protein 37	O94941	VIDQSTLEK	283	-1.59563	1.78601	-0.814781	1.40782	-0.185413	0.218621	-0.646986	1.01278	-0.436121	0.427535
RANBP2	E3 SUMO-protein ligase RanBP2	P49792	SDAGNLNFEFQVAK	1337	-1.85156	1.78571	0.102088	0.0630331	0.65155	0.491921	0.636408	0.520239	0.518741	0.431142
TANC1	Protein TANC1	Q9C0D5	TQHLEGTGTFTTR	1579	-0.515381	1.78455	0.0141887	0.0588691	0.0377149	0.0819115	0.159994	0.667527	0.111264	0.690801
KPNB1	Importin subunit beta-1	Q14974	NSLTSKDPDIK	63	-0.372682	1.78444	-0.0493955	0.106379	0.0749723	0.196423	0.207379	0.429192	0.352111	1.34823
CAMK2G	Calcium/calmodulin-dependent protein kinase type II subunit gamma	Q13555	FTDDYQLFEELGKGAFSVVR	10	-1.56136	1.78407	-0.60409	0.585775	-1.23033	2.22628	-0.86233	0.92605	-1.24848	1.43847
FECH	Ferrochelatase, mitochondrial	P22830	YYNQVGR	209	-1.19238	1.78405	0.0924403	0.0861469	-0.0228791	0.0149077	0.921438	0.983906	0.466959	0.508638
PPP4R3A	Serine/threonine-protein phosphatase 4 regulatory subunit 3A	Q6IN85	VYTLNEDRQWDDRGTGHVSSGYVER	10	-0.39569	1.78224	0.000967707	0.0033421	-0.264906	0.891126	-0.128217	0.390263	-0.488894	1.51335
ANO1	Anoctamin-1	Q5XXA6	YSTLPAEDR	7	-2.88773	1.78196	-0.132337	0.065118	-1.19522	0.870061	-1.50968	0.881614	-1.50338	0.902916
AFF4	AF4/FMR2 family member 4	Q9UHB7	IESETPVDLASSMPSSR	584	-1.1104	1.78142	-0.428116	1.53163	-0.28706	0.597661	-0.476084	1.31026	-0.0828215	0.23035
ISOC2	Isochorismatase domain-containing protein 2	Q96AB3	TCFSMVPALQQELDSRPQLR	83	-0.195949	1.77977	0.0221875	0.102698	0.0594055	0.297731	-0.0122812	0.0657607	-0.147633	0.641351
MYO10	Unconventional myosin-X	Q9HD67	NLALPEDVR	692	-0.635166	1.77897	0.0735937	0.142766	0.0488506	0.0779855	0.0728224	0.117806	-0.102051	0.139604
PLCB3	1-phosphatidylinositol 4,5-bisphosphate phosphodiesterase beta-3	Q01970	DDLIASILSEVAPTPLDELR	939	-3.25768	1.77894	-0.171694	0.125851	-0.0932345	0.0565884	-0.611399	0.394367	0.0394462	0.0256924
SPTAN1	Spectrin alpha chain, non-erythrocytic 1	Q13813	DLAALEDKVK	303	-1.88318	1.77871	-0.703469	0.392461	-1.05315	0.713927	-0.150735	0.0730246	-0.200021	0.117581
STK38	Serine/threonine-protein kinase 38	Q15208	GAIPSYMK	455	-0.302748	1.77845	-0.0575998	0.157655	-0.0580258	0.232559	-0.174465	0.402355	-0.166462	0.588286
BCLAF1	Bcl-2-associated transcription factor 1	Q9NYF8	FNDSEGDDTEETEDYR	394	0.189149	1.77817	-0.0796853	0.772127	0.0191463	0.0974517	-0.120279	1.31079	-0.119526	0.97664
UBA1	Ubiquitin-like modifier-activating enzyme 1	P22314	RVSGPDPKPGSNCSPAQSVLSEVPSVPTNGMAK	11	-0.735893	1.77774	-0.491742	0.798489	-0.182366	0.335288	-0.371154	1.06199	-0.278387	0.542085
KIF13B	Kinesin-like protein KIF13B	Q9NQT8	VTLQIPASSLDANRK	715	0.36837	1.77764	-0.444614	1.49048	-0.237109	0.609864	0.0682413	0.115904	-0.00833536	0.0164461
SPTBN2	Spectrin beta chain, non-erythrocytic 2	O15020	QAQVDKLYAGLKELAGER	1669	-1.67542	1.77741	-0.874616	0.624781	-0.889167	0.467023	-0.95652	0.859261	-1.10797	0.98886
ABHD11	sn-1-specific diacylglycerol lipase ABHD11	Q8NFV4	TAMLLALQRPELVER	137	-0.153874	1.77721	0.072707	0.999755	0.141278	2.63462	0.102974	1.57202	0.17284	1.89048
PCF11	Pre-mRNA cleavage complex 2 protein Pcf11	O94913	FAGLDTNQR	733	0.206499	1.77702	0.107759	0.979205	-0.000344959	0.00151551	0.0881448	0.664387	-0.000236709	0.00133494
USP37	Ubiquitin carboxyl-terminal hydrolase 37	Q86T82	SLGFLPQPVPLSVKK	301	0.744012	1.77667	-0.491911	0.817399	-0.156087	0.16425	-0.332039	0.448442	-0.708288	1.20374
LMO7	LIM domain only protein 7	Q8WWI1	SQFFEQGSSDSVVPDLPVPTISAPSR	1197	1.69697	1.77568	1.4378	1.72149	0.640305	0.534617	1.25311	0.973367	0.476682	0.485496
KIF1B	Kinesin-like protein KIF1B	O60333	LAVTSYTDIADLMDAGNK	184	0.587146	1.77552	-0.00968854	0.00946611	0.195449	0.43289	0.342568	0.995405	0.0640718	0.122433
ATP6V1D	V-type proton ATPase subunit D	Q9Y5K8	EAAFSLAEAK	64	-2.15653	1.77538	-0.812439	0.886448	0.453765	0.717135	0.632028	1.03077	0.626262	1.37941
SMARCA2	Probable global transcription activator SNF2L2	P51531	AIEDGNLEEMEEEVR	1328	0.420255	1.77538	0.259014	1.06708	-0.339919	0.831313	0.299509	1.17783	-0.00929071	0.0172592
YWHAH	14-3-3 protein eta	Q04917	NSVVEASEAAYKEAFEISK	144	-0.706778	1.77537	-0.129841	0.166615	0.0546324	0.0932527	0.0359546	0.0662381	0.122107	0.268565
UBR4	E3 ubiquitin-protein ligase UBR4	Q5T4S7	YTTTQQVVK	3556	-1.38858	1.77533	-0.616511	1.02094	0.0831773	0.124144	-0.192039	0.333714	-0.365805	0.867606
ANXA2	Annexin A2	P07355	QDIAFAYQRR	69	0.690626	1.77528	0.391281	0.864173	0.222333	0.363861	0.500067	1.32512	0.482236	1.22196
N4BP1	NEDD4-binding protein 1	O75113	AGTPVSELTK	240	-2.62058	1.77478	-1.72109	1.30699	-1.80817	1.42474	-0.394066	0.286206	-0.405289	0.237655
TUFM	Elongation factor Tu, mitochondrial	P49411	GLVMVKPGSIKPHQKVEAQVYILSKEEGGR	340	0.605649	1.77427	0.0360741	0.0613149	-0.467008	0.361055	-0.0358346	0.0559665	-0.593656	0.502808
RAI14	Ankycorbin	Q9P0K7	LGLVSPESMDNYSHFHELR	508	-1.64352	1.77405	0.142198	0.0610531	-0.721538	0.429637	0.152498	0.0763775	-0.762575	0.359192
DSP	Desmoplakin	P15924	KIVQLKPR	444	-2.21365	1.77391	0.270512	0.226916	0.829728	1.16527	0.80209	1.0961	0.860379	1.27566
RARS2	Probable arginine--tRNA ligase, mitochondrial	Q5T160	LLGITPVCRM	569	2.38641	1.77357	-0.816761	0.36516	-1.15512	0.595604	-0.372936	0.167227	-0.562288	0.216095
MLH3	DNA mismatch repair protein Mlh3	Q9UHC1	THSNSNTTENCVISETPLVLPYNNSK	953	1.19383	1.77335	1.30826	1.66542	1.26848	1.46115	0.587181	0.727445	0.707689	0.861131
KANSL1	KAT8 regulatory NSL complex subunit 1	Q7Z3B3	LSPGTDSSSNLGGVKLEGK	248	-1.40253	1.7728	-0.657791	0.686846	-0.621706	1.50014	-0.913456	1.93366	-0.582935	1.6224
SPTBN2	Spectrin beta chain, non-erythrocytic 2	O15020	DLNAAEALQRR	1831	-0.53371	1.77168	-0.149384	0.433741	-0.177441	0.794162	-0.0656781	0.225014	0.00374959	0.00811314
SETD5	Histone-lysine N-methyltransferase SETD5	Q9C0A6	GLPYATIIPR	55	0.941192	1.77129	0.642285	0.841184	0.178094	0.175098	0.00100395	0.0012286	0.690644	0.875679
RBM27	RNA-binding protein 27	Q9P2N5	ISQLKDELK	873	-0.208386	1.7711	-0.15173	0.933026	-0.171963	1.56764	-0.0773327	0.49596	-0.260588	1.94678
FANCI	Fanconi anemia group I protein	Q9NVI1	TIETSPSLSR	403	-0.335104	1.7709	-0.0305807	0.105086	-0.113146	0.278273	0.00995014	0.0281062	0.336069	2.10903
OTUD4	OTU domain-containing protein 4	Q01804	SRDEGYQYHR	1080	-1.24242	1.76943	0.495979	0.663392	0.230826	0.178794	0.871254	1.38562	0.403671	0.421648
ARHGAP26	Rho GTPase-activating protein 26	Q9UNA1	SLQEFATVLR	86	-1.02125	1.76879	0.0327444	0.0319925	-0.0873412	0.0889877	0.382644	0.617251	0.102137	0.0794607
FAM219B	Protein FAM219B	Q5XKK7	YSSGYSSAEQVNQDVSR	135	1.57679	1.76878	1.10851	0.835576	0.966439	0.684941	1.71798	2.58773	1.38982	1.82211
HSPA4	Heat shock 70 kDa protein 4	P34932	EFSITDVVPYPISLR	391	0.265254	1.76877	0.152227	0.72914	0.0675704	0.334228	-0.0151321	0.0432662	0.0885931	0.339594
MYCBP2	E3 ubiquitin-protein ligase MYCBP2	O75592	MPLTEPLR	2886	-0.531861	1.76872	-0.110337	0.346443	-0.146667	0.555072	-0.430089	2.18337	-0.0158965	0.050611
CMTR2	Cap-specific mRNA (nucleoside-2'-O-)-methyltransferase 2	Q8IYT2	CLLVGFSTLR	580	0.197411	1.76849	0.0332525	0.165663	0.074296	0.469377	0.148226	1.36299	0.1509	1.40305
SEMA4C	Semaphorin-4C	Q9C0C4	NNQTECFNFIR	105	1.90215	1.76846	0.307291	0.321159	0.418916	0.370514	1.09672	0.855885	0.819568	0.711492
MTX1	Metaxin-1	Q13505	QGADTLAFMSLLEEK	238	-0.837408	1.76841	-0.404969	0.755167	-0.220371	0.312412	-0.309158	0.468232	-0.501263	0.781238
MASTL	Serine/threonine-protein kinase greatwall	Q96GX5	ESSFEESNIEDPLIVTPDCQEK	596	-1.62324	1.76808	0.291909	0.336481	0.458452	0.770135	-0.0160955	0.00845285	-0.892188	0.476572
WDR37	WD repeat-containing protein 37	Q9Y2I8	EFENLYIENLELRR	68	-0.867271	1.76782	-0.849986	1.55717	-0.0737044	0.0794878	-0.712357	1.70641	-1.22682	1.34114
KRT18	Keratin, type I cytoskeletal 18	P05783	IMADIRAQYDELAR	248	-0.566622	1.76557	0.453673	0.459399	-0.225168	0.724743	0.160159	0.599996	-0.143899	0.356566
ACO2	Aconitate hydratase, mitochondrial	Q99798	FRLEAPDADELPK	522	0.681381	1.76549	0.609657	0.72837	0.30357	0.280324	-0.113358	0.0662721	-0.724758	0.620565
MAP4	Microtubule-associated protein 4	P27816	MDLAPSK	362	0.225008	1.76454	0.0347774	0.0929858	0.0396325	0.126674	0.225324	1.7041	0.0397404	0.174022
PTEN	Phosphatidylinositol 3,4,5-trisphosphate 3-phosphatase and dual-specificity protein phosphatase PTEN	P60484	FLKAQEALDFYGEVR	145	-1.04715	1.76451	-0.621845	0.918104	-0.679118	0.996414	-0.302926	0.420564	-0.883417	1.10473
PDXK	Pyridoxal kinase	O00764	GQVLNSDELQELYEGLR	54	1.53083	1.76438	0.162497	0.0938073	0.159893	0.0664798	0.166047	0.0676311	0.319689	0.194403
UCHL5	Ubiquitin carboxyl-terminal hydrolase isozyme L5	Q9Y5K5	RKHNYLPFIMELLK	288	-1.23478	1.76384	-0.448071	0.65998	-0.739077	1.24318	-0.268435	0.471617	-0.98776	1.74772
PTPRK	Receptor-type tyrosine-protein phosphatase kappa	Q15262	EGVVDIYNCVK	1105	0.241701	1.76324	0.153194	0.875725	-0.0264648	0.0641705	0.193041	1.23215	0.203207	1.20077
TPM1	Tropomyosin alpha-1 chain	P09493	ATDAEADVASLNR	78	-0.166479	1.76319	-0.140617	1.82274	-0.0691616	0.547048	-0.075271	0.774231	-0.0464293	0.376852
HSPBAP1	HSPB1-associated protein 1	Q96EW2	TSEVVEIQALR	338	-0.340675	1.76281	-0.0980254	0.29815	0.0200167	0.057134	-0.128061	0.24352	0.00357003	0.00865607
RTN4IP1	Reticulon-4-interacting protein 1, mitochondrial	Q8WWV3	FTQNMMMPIIHYPNEVIVK	59	1.09353	1.76255	1.43766	2.86051	1.81783	3.63278	0.846013	0.898197	1.63843	2.65335
KHDC4	KH homology domain-containing protein 4	Q7Z7F0	TALPAGPQPQPQPQPPLPSQPQAQK	437	2.43017	1.76202	0.373014	0.152576	-0.0665697	0.021304	-0.373136	0.158286	-0.348434	0.145178
LASP1	LIM and SH3 domain protein 1	Q14847	DSQDGSSYR	145	1.30345	1.76196	-0.025107	0.0176537	-0.264165	0.244926	-0.155643	0.121602	0.434241	0.408719
PPP6R1	Serine/threonine-protein phosphatase 6 regulatory subunit 1	Q9UPN7	VSGEEELHTGPPAPQGPLSVPQGLPTQSLASPPAR	729	-0.744865	1.76103	-0.17154	0.299245	-0.146473	0.273281	-0.48933	0.891071	-0.814608	2.05837
ITGB4	Integrin beta-4	P16144	MLLIENLR	1282	2.5172	1.76075	-1.00711	0.349841	0.842507	0.266468	0.727296	0.224366	0.425821	0.118119
DHX9	ATP-dependent RNA helicase A	Q08211	VQSDGQIVLVDDWIK	1075	-0.64886	1.76075	-0.342763	0.708098	-0.275481	0.634963	-0.780191	1.27203	-0.583971	0.788964
HID1	Protein HID1	Q8IV36	FLQHGTLVGLLPVPHPILIRK	726	1.39093	1.76074	0.168228	0.140521	-0.00304721	0.00227835	0.626261	0.501483	0.402922	0.30395
GFM2	Ribosome-releasing factor 2, mitochondrial	Q969S9	QVLEPLMNLEVTVAR	684	-0.914428	1.76056	-0.441192	0.639625	-0.284156	0.276484	-0.187152	0.203569	-0.410155	0.640169
CNPY2	Protein canopy homolog 2	Q9Y2B0	NGESSELDLQGIRIDSDISGTLK	112	0.373835	1.76038	0.2797	1.1758	0.278576	0.687891	0.0449357	0.0892166	0.242792	0.849379
MED27	Mediator of RNA polymerase II transcription subunit 27	Q6P2C8	GYNENVYTEDGKLDIWSK	216	-0.67778	1.76022	-0.13254	0.3009	0.163954	0.367834	0.136362	0.305249	0.254639	0.480463
PTGES3	Prostaglandin E synthase 3	Q15185	SILCCLRKGESGQSWPR	72	0.224219	1.75993	-0.0468763	0.178968	-0.277456	1.32165	-0.578652	3.00856	-0.917497	2.02111
EIF2AK4	eIF-2-alpha kinase GCN2	Q9P2K8	LEIASLSNQDHTSK	201	-1.09822	1.75956	-0.115078	0.154944	-0.226129	0.336475	-0.270568	0.275227	-0.252978	0.348977
ACACA	Acetyl-CoA carboxylase 1	Q13085	TVELSIPADPANLDSEAK	1992	0.213602	1.75955	0.035711	0.176233	0.108775	0.75032	0.0922265	0.471574	0.469579	3.861
ATR	Serine/threonine-protein kinase ATR	Q13535	EQILEHESLGLLR	1704	0.435312	1.75953	0.0615217	0.131353	0.0786013	0.190927	0.060898	0.143798	0.216471	0.438225
UBR5	E3 ubiquitin-protein ligase UBR5	O95071	AASTAPSSTSTPAASSAGLIYIDPSNLR	1726	0.398626	1.75941	-0.048477	0.109074	0.112597	0.478647	-0.152667	0.449509	-0.237867	0.577773
ARHGAP35	Rho GTPase-activating protein 35	Q9NRY4	IPTYNISVVGLSGTEKEK	11	0.536715	1.75881	0.156556	0.181471	-0.801269	0.571721	0.280973	0.491711	-0.0408186	0.0422154
VWA8	von Willebrand factor A domain-containing protein 8	A3KMH1	YTLPNGDTAWR	487	0.847375	1.75856	-0.551933	0.526068	-0.998387	0.897461	-0.653935	0.843099	-0.676676	0.614602
MYO9B	Unconventional myosin-IXb	Q13459	KKPGDASSLPDAGLSPGSQVDSK	1391	-1.22199	1.75843	-0.679541	1.15189	-0.790136	1.26908	-2.1402	3.64889	-0.679974	0.742292
AHNAK	Neuroblast differentiation-associated protein AHNAK	Q09666	KPDIDITGPK	3375	0.699391	1.75757	0.358511	0.936332	0.168398	0.273894	0.196315	0.370985	-0.286194	0.371767
TRAF6	TNF receptor-associated factor 6	Q9Y4K3	QNHEEIMDAKPELLAFQRPTIPR	444	-1.00055	1.75682	-0.770647	0.590812	-0.66946	0.390896	0.180914	0.114326	-0.34357	0.237903
TLN1	Talin-1	Q9Y490	MVGGIAQIIAAQEEMLRK	2494	-0.449825	1.75613	0.0910752	0.446976	-0.191575	0.633236	-0.197163	0.643932	-0.00281439	0.0105306
SH3GL1	Endophilin-A2	Q99961	EPFDLGEPEQSNGGFPCTTAPK	261	-0.955481	1.75604	-0.573426	0.827737	-0.469151	0.687201	-0.557629	0.460135	-1.36419	1.29477
PCM1	Pericentriolar material 1 protein	Q15154	KQLEALMAEHQR	841	2.02994	1.75572	1.7469	1.31831	1.62653	1.2297	1.29341	0.830723	0.976955	0.646441
PFKP	ATP-dependent 6-phosphofructokinase, platelet type	Q01813	SFAGNLNTYKR	386	0.10832	1.75513	-0.00844845	0.0747106	-0.00811088	0.0885596	-0.00590198	0.05434	0.0717385	0.950162
EPPK1	Epiplakin	P58107	VSAWELINSEYFSEGRR	831	0.434925	1.75447	-0.0162148	0.0272416	-0.186425	0.394549	0.013204	0.0303455	0.192942	0.412622
DSP	Desmoplakin	P15924	EKLLSAER	2327	-2.85736	1.75406	-1.06154	0.577244	-0.173769	0.353262	-1.13453	0.539516	-0.294833	0.732423
BAZ1A	Bromodomain adjacent to zinc finger domain protein 1A	Q9NRL2	QGGVHELSAFEQLVVELVR	1429	-0.829168	1.75401	-0.229017	0.289344	-0.137123	0.149466	0.105222	0.158833	-0.668095	1.27804
ERC1	ELKS/Rab6-interacting/CAST family member 1	Q8IUD2	AAGLQAEIGQVK	461	-0.39387	1.75399	-0.44832	1.09137	-0.13401	0.492951	-0.092624	0.217976	0.0160239	0.034111
GUF1	Translation factor GUF1, mitochondrial	Q8N442	EITIINPAQFPDKSK	451	-1.5252	1.75385	-1.02292	0.668123	-0.531484	0.484141	0.187974	0.269559	-0.438776	0.471401
ZNF316	Zinc finger protein 316	A6NFI3	THTGEKPFPCPDCGKR	394	-0.558556	1.75257	0.0805674	0.215174	0.106267	0.292588	-0.00527931	0.00852959	0.187114	0.584012
POLR1A	DNA-directed RNA polymerase I subunit RPA1	O95602	FNPSVFFLDFLVVPPSR	292	-0.949366	1.7521	-1.0197	1.25866	-0.350934	0.368401	-0.459295	1.14739	-0.312081	0.34526
EVPL	Envoplakin	Q92817	SLLEEER	1157	0.254521	1.75183	0.113326	0.683617	0.0820037	0.414803	0.104668	0.40284	0.0756144	0.348613
ZNF562	Zinc finger protein 562	Q6V9R5	SSLQQGFLK	99	0.840481	1.75131	0.503728	0.924867	0.619779	1.22044	0.136515	0.0789519	0.193692	0.249864
UBE4B	Ubiquitin conjugation factor E4 B	O95155	VVSQSLQHYLELGR	624	1.80517	1.75079	0.639437	0.573529	1.00784	0.855004	0.287461	0.185907	1.01888	0.778492
HDHD5	Haloacid dehalogenase-like hydrolase domain-containing 5	Q9BXW7	RMLVSGQGPVMENAQGLGFR	133	1.39137	1.75071	0.907239	0.843065	0.689099	0.784092	0.276179	0.440093	0.596346	0.577312
MYO18A	Unconventional myosin-XVIIIa	Q92614	FDSELSQAHEEAQR	1463	-1.46596	1.75047	-1.37297	1.32615	-0.270885	0.362716	-0.426793	0.619216	0.190902	0.218856
DDX10	Probable ATP-dependent RNA helicase DDX10	Q13206	ISVLYSFLR	301	-0.572795	1.75019	-0.391022	0.976831	-0.905922	1.30538	-0.394573	1.03939	-0.53446	1.34322
SAMD4B	Protein Smaug homolog 2	Q5PRF9	AALEMQNYR	538	1.70897	1.75013	0.330987	0.197926	0.133092	0.065488	0.354761	0.20166	0.15289	0.0820244
SFSWAP	Splicing factor, suppressor of white-apricot homolog	Q12872	FEFLQPWHQYNAYYEFKK	486	-0.699316	1.7499	-0.163344	0.447387	-0.39216	1.24091	-0.422749	1.93349	-0.452511	1.48088
COPG2	Coatomer subunit gamma-2	Q9UBF2	ITDGTMLQAIER	131	-0.21305	1.74981	-0.175438	1.27677	-0.118233	0.521702	-0.132878	0.657214	0.0219113	0.059911
HMGB2	High mobility group protein B2	P26583	IKSEHPGLSIGDTAK	113	-0.126602	1.74974	0.00484373	0.0433853	-0.00408125	0.0436418	-0.0660935	1.22237	-0.0424477	0.531757
SETD2	Histone-lysine N-methyltransferase SETD2	Q9BYW2	HYSDHWEDER	1096	1.03649	1.74959	1.17854	1.42142	0.834403	1.33448	0.59196	0.605835	0.0821943	0.0710745
CASZ1	Zinc finger protein castor homolog 1	Q86V15	AGEQLSWPAPSTK	248	1.89705	1.74959	0.493328	0.186793	0.577968	0.241169	0.343648	0.144224	1.03082	0.607995
MED24	Mediator of RNA polymerase II transcription subunit 24	O75448	MLGLDEREK	630	1.39485	1.7493	0.396368	0.167351	1.24342	1.90673	1.46528	1.3135	0.864775	0.417692
INPP5J	Phosphatidylinositol 4,5-bisphosphate 5-phosphatase A	Q15735	DALFTDQWSELFMDALGPFNFVLVSSVR	476	-1.27519	1.74923	-1.00298	1.14906	-0.280897	0.235978	-0.413553	0.288975	-0.731657	0.663048
TRIM33	E3 ubiquitin-protein ligase TRIM33	Q9UPN9	QIDLVDNYFVK	190	0.185544	1.74911	-0.0436824	0.228642	-0.0418777	0.225016	0.0101726	0.0632998	-0.00425076	0.0218823
FAM83H	Protein FAM83H	Q6ZRV2	LSLGQGDSTEAATEER	1002	0.115651	1.74904	0.0956607	1.36456	0.0678029	0.830937	-0.00510629	0.0429328	0.0555704	0.538887
NSUN4	5-methylcytosine rRNA methyltransferase NSUN4	Q96CB9	NLAANDLSPSR	199	-0.623943	1.74887	-1.50412	0.995545	-2.29251	1.83679	0.0457954	0.0682524	-0.271301	0.498067
SMAD1	Mothers against decapentaplegic homolog 1	Q15797	EVCINPYHYK	119	-0.379701	1.74869	-0.0669299	0.263865	-0.0417908	0.128168	-0.0363162	0.130072	-0.320012	1.38107
PRIM1	DNA primase small subunit	P49642	ALKEDFGFK	145	-0.71983	1.74856	-0.252099	0.209915	-0.552621	0.430105	-0.62007	0.583476	-1.79305	1.56967
TASOR2	Protein TASOR 2	Q5VWN6	DVPVPTNAK	428	-0.550398	1.74789	-1.78132	1.18085	-1.84405	1.13555	-3.84015	6.30676	-2.1935	1.74582
CBX8	Chromobox protein homolog 8	Q9HC52	ELPDPSQRPLGEPSAGLGEYLK	206	0.778648	1.74616	0.679827	1.13078	0.583563	0.966791	0.640624	2.04781	1.17368	3.55286
SON	Protein SON	P18583	ANAAAMCAK	2064	1.44904	1.74601	0.953428	1.4247	0.481105	0.275971	-1.76126	0.453178	-0.242927	0.114511
KDM3B	Lysine-specific demethylase 3B	Q7LBC6	KKPLFITTDSSK	689	-0.153777	1.74591	0.147589	0.779734	0.271971	2.48181	0.158529	1.24697	0.124238	0.814649
SNX9	Sorting nexin-9	Q9Y5X1	QVTGRFEEEFIK	314	1.60261	1.74589	1.60445	1.46801	0.0994533	0.0359551	1.21383	0.930072	0.740619	0.39416
DYNC1H1	Cytoplasmic dynein 1 heavy chain 1	Q14204	FYFDPKQTDVLQQLSIQMANAK	1844	0.526828	1.74565	0.0999545	0.240921	0.344293	0.932037	0.1286	0.219895	-0.0237445	0.0399788
PIR	Pirin	O00625	MNPGDLQWMTAGR	85	-0.457343	1.7453	0.000604295	0.00211535	0.0139018	0.0479371	0.143774	0.789788	-0.191738	0.861486
ERAL1	GTPase Era, mitochondrial	O75616	IGWPHFK	297	1.88927	1.74458	0.588502	0.253764	1.59549	1.36013	1.57164	1.43725	1.64177	1.30629
F8A1	40-kDa huntingtin-associated protein	P23610	CQQALFHGPGEALALTEAAR	76	0.224684	1.74457	0.0806733	0.349349	0.0372536	0.101361	0.119333	0.647143	0.258707	1.90923
EXOC1	Exocyst complex component 1	Q9NV70	NYMDYLSR	409	-0.755073	1.74426	0.0267765	0.0424614	-0.048902	0.0632739	-0.0275252	0.0399325	0.000319808	0.000361662
CUL9	Cullin-9	Q8IWT3	VGLQSPSVEAWEAK	2432	0.718176	1.74361	0.307764	0.572372	0.544046	1.22723	0.563826	1.26197	0.767053	1.50122
SHPRH	E3 ubiquitin-protein ligase SHPRH	Q149N8	AVATSQLQK	1397	-2.93852	1.7429	0.170947	0.209564	-0.4582	0.227454	0.21189	0.387504	0.383127	0.792953
PGD	6-phosphogluconate dehydrogenase, decarboxylating	P52209	VDDFLANEAK	39	0.186015	1.74252	0.112389	1.10424	0.214288	2.01062	0.168508	1.42634	0.134671	0.818543
RBBP8	DNA endonuclease RBBP8	Q99708	GYIKEDLDPCPRPK	866	-0.679569	1.74219	-0.274339	1.04443	-0.467825	1.58693	-0.228636	0.662092	-0.402631	0.902049
RFC3	Replication factor C subunit 3	P40938	NLVQCGDFPHLLVYGPSGAGKK	28	-1.09296	1.74211	-0.139402	0.213078	0.115437	0.183705	-0.145488	0.178554	0.279888	0.546823
PIAS1	E3 SUMO-protein ligase PIAS1	O75925	HELELPHLTSALHPVHPDIK	118	-1.43679	1.74191	-1.55481	1.46688	-1.92071	1.51935	-1.45977	1.34501	-1.60057	1.28785
SYMPK	Symplekin	Q92797	TESVLIK	484	-0.198944	1.74186	-0.00231178	0.00980015	-0.0248484	0.12755	0.0304882	0.170431	-0.127232	0.863893
SMURF2	E3 ubiquitin-protein ligase SMURF2	Q9HAU4	LSANLHLVLNR	330	-0.759539	1.74178	-0.149181	0.332169	-0.252408	0.509075	-0.092491	0.161723	-0.232805	0.474054
DNAJC9	DnaJ homolog subfamily C member 9	Q8WXX5	EMDNFLAQMEAK	230	-0.549436	1.74125	0.0481023	0.158602	-0.126505	0.357553	0.108569	0.419484	-0.0638494	0.132458
OTUD5	OTU domain-containing protein 5	Q96G74	ESYLQWLR	405	0.30482	1.74123	0.149539	0.88793	0.0820608	0.332322	0.177346	0.812042	-0.0535188	0.12392
TJP1	Tight junction protein ZO-1	Q07157	YEPIQATPPPPPLPSQYAQPSQPVTSASLHIHSK	1419	1.12685	1.74106	-0.180145	0.116128	-0.196847	0.118854	-0.0957402	0.0646968	0.234458	0.161187
CWC22	Pre-mRNA-splicing factor CWC22 homolog	Q9HCG8	QLCLTASK	251	1.00448	1.74042	0.488324	0.752453	1.13777	2.20391	1.03668	1.60819	1.22978	2.16775
NCBP2	Nuclear cap-binding protein subunit 2	P52298	TACGFCFVEYYSR	79	-0.277312	1.74025	0.0331204	0.142778	0.0563675	0.324571	0.187378	1.33474	0.326423	2.66252
AFDN	Afadin	P55196	LAAEVYKDMPETSFTR	198	-1.06592	1.73885	0.28286	0.16649	-0.882847	1.60006	-0.296972	0.571435	-0.86188	1.52214
ABCF3	ATP-binding cassette sub-family F member 3	Q9NUQ8	ALFARPDLLLLDEPTNMLDVR	341	-0.309744	1.73822	-0.18771	0.7634	-0.244934	1.94047	-0.312027	2.44292	-0.375223	2.36705
MSH2	DNA mismatch repair protein Msh2	P43246	ALELEEFQYIGESQGYDIMEPAAKK	848	-0.449273	1.73807	0.125697	0.350831	0.132156	0.36989	0.0168848	0.0452459	-0.172257	0.509671
NOM1	Nucleolar MIF4G domain-containing protein 1	Q5C9Z4	SGAEEASGHRQDTEER	114	2.37684	1.73785	2.32652	1.77284	1.24364	0.573197	2.21961	1.62127	2.50706	1.94479
CCNT1	Cyclin-T1	O60563	IPVAGGDKAASSKPEEIK	464	-0.821496	1.73772	-0.623592	0.603244	-0.069781	0.100619	-0.420863	0.872416	-0.342833	0.639381
AIF1L	Allograft inflammatory factor 1-like	Q9BQI0	YMEFDLNNEGEIDLMSLKR	56	-0.435944	1.7376	0.019844	0.0451719	0.0963295	0.210982	0.130438	0.271749	0.157742	0.364511
TLE2	Transducin-like enhancer protein 2	Q04725	ELILNDLPASTPASK	288	-0.700258	1.73679	0.0977332	0.266248	0.0111055	0.0249929	-0.0532545	0.0999852	-0.197435	0.630854
TRIP4	Activating signal cointegrator 1	Q15650	LMSGVENSGKVDISTK	230	-0.940035	1.73671	-0.715212	1.24913	-0.799275	1.20013	-0.146649	0.205331	-0.970888	0.895025
CNOT1	CCR4-NOT transcription complex subunit 1	A5YKK6	AVEGLLDATSGADADLLLR	1665	0.1867	1.73665	0.049098	0.227295	-0.0838271	0.46257	-0.216419	1.54381	-0.193329	0.693128
VAPA	Vesicle-associated membrane protein-associated protein A	Q9P0L0	HEQILVLDPPTDLK	11	-0.346461	1.73664	-0.0876431	0.211485	0.179553	0.473822	0.105643	0.239885	0.329299	1.20668
DNMT1	DNA (cytosine-5)-methyltransferase 1	P26358	DMVKFGGSGR	672	-2.31155	1.7363	-1.21027	0.729338	-0.543282	0.213547	-0.760431	0.33703	-1.02001	0.435808
TSC1	Hamartin	Q92574	VSLQKEQAR	752	-1.06592	1.73627	-0.865702	1.61053	-0.906644	1.65307	-0.565387	0.987827	-0.807751	1.41964
ATL3	Atlastin-3	Q6DD88	EINGSKVTCR	310	-1.48665	1.73589	-0.6327	0.76123	-1.04581	1.45631	-0.225837	0.18844	-0.925791	1.20034
DST	Dystonin	Q03001	VNNSGISLCNLISAVTTPAK	4431	-1.33756	1.73584	0.23446	0.237468	-0.351248	0.295546	-0.0568813	0.0499314	0.0621316	0.0579048
TRPC4AP	Short transient receptor potential channel 4-associated protein	Q8TEL6	LDEVPNLSSLVSNFDQQQLANFCR	224	0.695275	1.73574	-0.0540078	0.0479822	-1.32655	1.09666	-0.0511684	0.0418967	0.0527242	0.0749791
ECPAS	Proteasome adapter and scaffold protein ECM29	Q5VYK3	VNDVVPWVLDVILNK	935	-1.16153	1.73515	-0.526156	0.814753	-0.341224	0.400052	-0.101102	0.107263	-0.672798	1.08958
PRRC2B	Protein PRRC2B	Q5JSZ5	SSMGSMFR	470	-0.59395	1.73469	-0.129996	0.270935	-0.194831	0.710969	-0.0235137	0.0649432	0.0223962	0.0375723
RSRC1	Serine/Arginine-related protein 53	Q96IZ7	AGLEHLPPAEQAK	172	-1.14486	1.73469	0.118862	0.129517	-0.762098	0.978716	-0.664926	1.08312	-0.600077	0.919768
SMC1A	Structural maintenance of chromosomes protein 1A	Q14683	ARQEFEER	346	-0.270728	1.73463	-0.288345	1.28469	-0.107463	0.429072	-0.0960959	0.404221	-0.117271	0.482288
PANK4	4'-phosphopantetheine phosphatase	Q9NVE7	GEVQALFLR	346	-0.767188	1.73354	-0.330989	0.539537	-0.633987	1.4739	-1.05539	1.95638	-1.58479	3.38592
MED22	Mediator of RNA polymerase II transcription subunit 22	Q15528	IEDETQVSR	42	2.14293	1.73281	1.79309	1.175	1.27934	1.08031	0.850543	0.573415	-0.317417	0.144222
SYTL1	Synaptotagmin-like protein 1	Q8IYJ3	ILTGDWFQEAR	78	-1.5946	1.73164	-0.29468	0.344954	-0.236856	0.365656	-0.195157	0.37325	-0.256263	0.372115
EFHD1	EF-hand domain-containing protein D1	Q9BUP0	LIKDLESMFK	91	-1.36772	1.7314	-0.644662	1.19735	0.0992128	0.13791	-0.987003	1.16951	-0.082815	0.104571
PRUNE1	Exopolyphosphatase PRUNE1	Q86TP1	FDVSGLTTEQMLR	223	-1.92279	1.73128	-0.611696	1.36194	-1.03702	1.58707	-0.937926	1.60844	-1.16451	1.38194
MACF1	Microtubule-actin cross-linking factor 1, isoforms 1/2/3/4/5	Q9UPN3	QQNTCHQQLEDLCSWVGQAER	3615	0.30463	1.73077	0.107412	0.434626	-0.0379996	0.086355	-0.0322146	0.0829611	-0.114547	0.185616
BRPF3	Bromodomain and PHD finger-containing protein 3	Q9ULD4	GYPSYPALIIDPK	1086	0.865189	1.73073	-0.912953	0.859531	0.224969	0.29053	-0.332698	0.196339	-0.275846	0.308228
CRBN	Protein cereblon	Q96SW2	KPNIINFDTSLPTSHTYLGADMEEFHGR	43	-0.667729	1.73069	0.0145081	0.0217613	-0.0288672	0.0341982	0.0167206	0.0261494	-0.0555972	0.0719769
NOP56	Nucleolar protein 56	O00567	LLLETHLPSKK	78	1.40973	1.73065	-0.189004	0.130904	0.515251	0.434243	1.86596	0.680332	2.03881	0.837831
TNS3	Tensin-3	Q68CZ2	ASEAASPLPDSPGDK	1144	-0.458016	1.73039	-0.0476024	0.156579	0.00623076	0.0199595	0.120218	0.394309	-0.0485426	0.182823
NEDD1	Protein NEDD1	Q8NHV4	QNAPLTSIQIR	580	0.363919	1.72902	0.0321968	0.0700328	0.19367	0.668854	0.370996	1.96784	0.30373	1.08025
PPP1R13L	RelA-associated inhibitor	Q8WUF5	NYFGLFPR	813	-0.976004	1.72881	0.318343	0.403195	0.0341013	0.0272894	0.400135	0.599697	0.430203	0.657787
RBM41	RNA-binding protein 41	Q96IZ5	ELGLNETEILIWK	87	0.847007	1.72856	0.0641306	0.0607387	0.859229	1.5693	0.578437	0.832356	0.369513	0.496997
ERP29	Endoplasmic reticulum resident protein 29	P30040	GALPLDTVTFYKVIPK	37	-1.06201	1.72794	-0.80675	0.860692	-0.816468	0.948689	-0.556254	0.646648	-0.923705	1.12684
PLIN3	Perilipin-3	O60664	AQEALLQLSQVLSLMETVK	265	-2.1538	1.72786	0.837075	0.327562	1.23983	0.620228	1.50705	0.629095	1.86279	1.34383
PUS3	tRNA pseudouridine(38/39) synthase	Q9BZE2	VRELEQEVQR	18	2.45415	1.72744	1.08738	0.490679	0.0165226	0.00867469	1.17111	1.03776	1.16378	0.896475
KIAA1217	Sickle tail protein homolog	Q5T5P2	QIASLTGLVQSALFK	569	0.503529	1.72611	0.0519782	0.118469	-0.0149503	0.031515	0.226883	0.554418	0.046432	0.102224
MVP	Major vault protein	Q14764	VLFAPMR	43	-0.60401	1.72599	-0.100219	0.161231	0.00401568	0.00588424	0.180256	0.430963	-0.00447764	0.00563488
ANKZF1	tRNA endonuclease ANKZF1	Q9H8Y5	ALEEAGTILLRAPR	287	0.795548	1.72539	0.0860693	0.0780101	0.15539	0.212566	0.411669	0.644971	0.133795	0.157693
FLOT2	Flotillin-2	Q14254	QEEIEIEVVQR	254	1.79644	1.72419	0.597982	0.311857	0.714459	0.352811	1.22054	0.621539	1.06964	0.531308
ACTN4	Alpha-actinin-4	O43707	MVSDINNGWQHLEQAEK	379	-1.28427	1.72419	-0.955612	0.616211	-0.687135	0.636086	0.589361	0.90828	1.05997	1.72319
HMGCS1	Hydroxymethylglutaryl-CoA synthase, cytoplasmic	Q01581	ASSELFSQK	322	-0.271057	1.72416	-0.158777	0.677794	-0.217016	1.0001	-0.00980634	0.0332814	-0.101208	0.357399
TMLHE	Trimethyllysine dioxygenase, mitochondrial	Q9NVH6	TIRLDETTLFFTWPDGHVTK	108	1.80582	1.72385	1.27058	1.3331	0.393879	0.199309	0.351022	0.180513	0.742311	0.630376
AP1B1	AP-1 complex subunit beta-1	Q10567	LAPPLVTLLSAEPELQYVALR	284	2.40017	1.72323	0.907397	0.409228	0.247637	0.0938697	0.352717	0.133563	1.78435	1.12079
HMGCL	Hydroxymethylglutaryl-CoA lyase, mitochondrial	P35914	GIQKFPGINYPVLTPNLK	94	-0.332472	1.72312	-0.178074	0.797674	-0.195322	0.862444	-0.262502	1.53324	-0.35877	2.27085
FLII	Protein flightless-1 homolog	Q13045	GLDIYVWR	653	-1.56411	1.72304	0.15754	0.275088	-0.00728799	0.00683294	0.384707	0.675442	-0.0356287	0.0526901
INTS4	Integrator complex subunit 4	Q96HW7	KWGDDAPK	353	-2.02348	1.72304	-0.260176	0.174284	-0.286245	0.157006	-1.50109	1.15785	-0.703732	0.363303
STAT1	Signal transducer and activator of transcription 1-alpha/beta	P42224	EGAITFTWVER	609	-0.322182	1.72295	-0.207224	0.480987	-0.11145	0.42536	-0.102636	0.267274	-0.0939819	0.486329
DHX37	Probable ATP-dependent RNA helicase DHX37	Q8IY37	SVYTDILIGLLSR	378	-1.55806	1.72289	-0.958889	0.713612	-0.245982	0.189593	0.165785	0.131122	-0.837784	0.84916
MEF2D	Myocyte-specific enhancer factor 2D	Q14814	LLSPQQPALQR	178	-2.55907	1.72172	0.405944	0.223498	-0.556103	0.182542	1.21298	0.882761	1.27881	0.917359
ZC3H4	Zinc finger CCCH domain-containing protein 4	Q9UPT8	AATAGPPNAR	1015	0.19971	1.72139	0.0877274	0.42125	0.167607	1.26852	0.208008	1.27069	0.123686	0.804361
KRT18	Keratin, type I cytoskeletal 18	P05783	SLETENRR	100	-0.980452	1.72067	-0.103657	0.129049	-2.39398	1.87777	-0.389481	0.425114	-0.831563	1.32244
ANKRD11	Ankyrin repeat domain-containing protein 11	Q6UB99	QQHEAAALNAVQR	2609	-0.878408	1.72062	-0.0332723	0.0290437	-0.109306	0.122292	0.176414	0.470904	-0.00558532	0.0061287
ANGPTL2	Angiopoietin-related protein 2	Q9UKU9	VHKQELELLNNELLK	84	-3.13268	1.71956	2.19955	0.973907	3.24972	1.94139	2.1232	1.10873	2.25305	1.14537
SMARCA2	Probable global transcription activator SNF2L2	P51531	VLFGPEAPK	605	-0.646863	1.71848	-1.07123	0.498772	-0.461984	1.06284	-0.0627902	0.159712	-0.162032	0.543483
GOLGA3	Golgin subfamily A member 3	Q08378	VMVEAYR	850	1.3845	1.7184	0.720189	0.493885	1.3915	1.54987	1.99325	3.47071	0.553537	0.305715
PLEC	Plectin	Q15149	ALQALEELRLQAEEAER	1671	-1.74873	1.71823	0.529723	0.407273	-0.398134	0.211539	-0.948994	0.455102	0.246473	0.148161
POLR1A	DNA-directed RNA polymerase I subunit RPA1	O95602	VLEVGALQAVYELER	126	0.707559	1.71799	0.217791	0.37697	-0.626677	0.510685	-0.229123	0.167391	0.250425	0.45737
SERPINH1	Serpin H1	P50454	SALQSINEWAAQTTDGKLPEVTK	168	0.246468	1.71798	0.0341861	0.159271	0.0842849	0.625303	-0.106798	0.541616	-0.0683497	0.275637
EP400	E1A-binding protein p400	Q96L91	SLVPQVSQATGVQLPGK	2728	-0.589925	1.7172	-0.400358	0.802003	-0.44242	0.883566	-0.604717	1.28114	-0.271533	0.528481
UAP1L1	UDP-N-acetylhexosamine pyrophosphorylase-like protein 1	Q3KQV9	WEEEGFR	93	-0.939557	1.71672	0.679243	1.93421	0.185648	0.256348	0.408254	0.988171	0.783292	2.2527
NSUN6	tRNA (cytosine(72)-C(5))-methyltransferase NSUN6	Q8TEA1	VFLGNGISELSRK	170	-0.390967	1.71661	-0.104946	0.396981	-0.256679	0.956271	-0.15702	0.332985	-0.865506	0.488016
WDR3	WD repeat-containing protein 3	Q9UNX4	TEVWGLVLLSEEKR	192	-1.11397	1.71566	-0.679111	1.01421	-0.512709	0.570108	-0.50486	0.79992	-0.622449	0.939549
UBE3B	Ubiquitin-protein ligase E3B	Q7Z3V4	FTLSQTSR	2	-1.09644	1.71523	-0.301942	0.171576	-0.50906	0.408217	-0.129144	0.117159	-0.625286	0.72138
TLK2	Serine/threonine-protein kinase tousled-like 2	Q86UE8	LRLGHFTTVR	294	-1.0174	1.71485	0.117725	0.160585	-0.256571	0.368825	-0.851972	1.23328	-0.296661	0.496391
SPAG5	Sperm-associated antigen 5	Q96R06	LSLSLSPSPQTGKPSMR	7	1.02014	1.7148	0.0313801	0.0154529	-0.303092	0.246719	-0.463257	0.664812	-0.921368	0.867237
CNOT8	CCR4-NOT transcription complex subunit 8	Q9UFF9	ELFFEDSIDDAKYCGR	243	1.45224	1.71479	0.670123	1.13212	0.982484	1.25584	0.219309	0.176563	0.17596	0.203578
SRCAP	Helicase SRCAP	Q6ZRS2	SPFYLDSLEEK	1882	-1.47459	1.71476	-0.232884	0.231916	0.0798727	0.0788077	-0.157035	0.131261	-0.576555	0.494553
ARID1A	AT-rich interactive domain-containing protein 1A	O14497	SAYPPPAPAYALSSPR	220	0.226287	1.71422	0.167479	1.35099	-0.0140911	0.0505112	0.172024	1.43286	0.159038	0.896788
PRDX1	Peroxiredoxin-1	Q06830	ATAVMPDGQFK	17	-0.937201	1.71388	-0.451424	1.57766	-0.290825	1.09306	-0.580422	1.68337	-0.518265	1.37848
MAP2K1	Dual specificity mitogen-activated protein kinase kinase 1	Q02750	ELELMFGCQVEGDAAETPPRPR	270	-0.618858	1.71381	-0.281055	0.414948	-0.129963	0.182699	0.161952	0.572389	0.45763	2.22027
MCM6	DNA replication licensing factor MCM6	Q14566	YTQPNICR	174	0.16137	1.71352	0.0566892	0.342085	0.0780819	0.623853	0.0107564	0.0613932	-0.699323	6.15443
KTN1	Kinectin	Q86UP2	QENGILR	424	0.372775	1.71342	-0.0426957	0.0727322	0.0850809	0.183527	0.0332157	0.0780346	0.128337	0.354965
MACROD1	ADP-ribose glycohydrolase MACROD1	Q9BQ69	LEVDAIVNAANSSLLGGGGVDGCIHR	164	-0.260918	1.71318	-0.0866183	0.235859	-0.16085	0.62709	-0.243389	1.4213	-0.0754478	0.25097
TIMELESS	Protein timeless homolog	Q9UNS1	TFHFIEQNLTNYYEMMLTDRK	407	-0.979407	1.71266	-0.72025	0.719849	0.503517	0.638842	0.824316	1.1423	0.375258	0.287814
MTA2	Metastasis-associated protein MTA2	O94776	YGGLKTPTQLEGATR	401	-4.66543	1.71252	-0.402288	0.0756768	-1.21859	0.253103	-2.69243	0.724538	-1.49655	0.348558
FBXL12	F-box/LRR-repeat protein 12	Q9NXK8	MGGYLFSGSQAPQLSPALLR	76	-1.01173	1.71233	-0.675915	1.00277	-0.248133	0.217752	-0.164978	0.17136	-0.648176	0.445832
IARS1	Isoleucine--tRNA ligase, cytoplasmic	P41252	APLKPYPVSPSDKVLIQEK	1039	-0.193532	1.71213	-0.0483636	0.250872	0.0451748	0.234249	0.0304287	0.104916	0.287818	1.7458
UBA6	Ubiquitin-like modifier-activating enzyme 6	A0AVT1	AVTIHDTEK	87	-1.78976	1.71165	0.632279	0.338015	1.04484	0.609327	0.286203	0.148447	0.987044	0.688679
RNASEH2C	Ribonuclease H2 subunit C	Q8TDP1	CLRGEEVAVPPGLVGYVMVTEEK	67	-0.245248	1.71158	-0.0455537	0.172165	-0.086282	0.268161	-0.146912	0.730045	-0.0304076	0.085099
EPS8	Epidermal growth factor receptor kinase substrate 8	Q12929	AALEDSSGSSELQEIMRR	782	0.550604	1.71152	0.360489	0.768142	0.247811	0.30323	0.712056	2.44942	0.841167	2.76945
SCYL2	SCY1-like protein 2	Q6P3W7	MVHGNITPENIILNK	174	-0.438455	1.71147	0.0218425	0.0477725	0.22211	0.979023	0.10135	0.3439	0.154648	0.589787
NOSIP	Nitric oxide synthase-interacting protein	Q9Y314	VLPSFWIPSLTPEAK	158	0.286453	1.71147	0.158062	0.846752	0.0362258	0.152462	-0.105934	0.450889	-0.158283	0.708682
TFAM	Transcription factor A, mitochondrial	Q00059	KKELTLLGKPK	146	-0.565089	1.71105	-0.113379	0.18945	-0.124869	0.323656	0.0294862	0.0766052	-0.642315	1.36219
DMXL2	DmX-like protein 2	Q8TDJ6	QLQSPLPLPTTLPLLSASIASTK	2194	0.892369	1.71093	0.60213	0.56432	0.378992	0.54631	0.482914	0.744151	0.595039	1.13784
SCML2	Sex comb on midleg-like protein 2	Q9UQR0	EYASEGEPLFAGGSAIPKEENLSEDSK	519	1.56601	1.71018	0.906816	0.884288	0.582905	0.402335	0.752735	0.727939	0.953636	0.995792
PYCR1	Pyrroline-5-carboxylate reductase 1, mitochondrial	P32322	MLLHSEQHPGQLKDNVSSPGGATIHALHVLESGGFR	216	-0.931065	1.71002	0.61034	0.69451	0.629925	0.970283	0.653508	0.932919	0.506765	0.383948
CARS1	Cysteine--tRNA ligase, cytoplasmic	P49589	LYKEYLQMAQNGSFQ	734	-1.63067	1.70962	-0.140914	0.222321	-0.116662	0.194423	0.0445457	0.0710273	-1.32216	0.6759
COPA	Coatomer subunit alpha	P53621	QLFLQTYAR	957	2.00699	1.70941	1.09965	0.769354	0.6418	0.386262	1.63354	1.23753	-0.0858505	0.02381
NRDE2	Nuclear exosome regulator NRDE2	Q9H7Z3	VSVYPLAPLREALSQALK	975	1.37169	1.70908	0.940272	1.09135	0.843928	0.824902	1.38975	1.86549	0.0638189	0.0345153
SIPA1L3	Signal-induced proliferation-associated 1-like protein 3	O60292	YYQDYFVGK	503	-1.06484	1.70872	-0.46469	0.389449	0.311158	0.317325	-0.248733	0.220257	0.085827	0.055885
LARS2	Leucine--tRNA ligase, mitochondrial	Q15031	GMQAHWIGDCVGCHLDFTLK	267	-0.718816	1.70868	0.0733349	0.120151	0.324664	0.898415	0.219218	0.306943	0.11178	0.107225
WASHC4	WASH complex subunit 4	Q2M389	AYVTHYLDK	727	-2.80073	1.70849	-0.539652	0.157519	0.388169	0.11436	0.128519	0.033658	-1.54062	0.552241
NFX1	Transcriptional repressor NF-X1	Q12986	IAAISMASK	911	1.32076	1.70838	0.0453827	0.0300941	0.247081	0.238177	0.818499	0.814593	1.08073	1.29623
NSUN5	28S rRNA (cytosine-C(5))-methyltransferase	Q96P11	VLVYELLLGKGFR	73	1.01464	1.70837	0.594993	0.591024	-0.0177264	0.0141402	0.245699	0.210687	0.936466	1.28067
SERPINH1	Serpin H1	P50454	DQAVENILVSPVVVASSLGLVSLGGK	61	1.1168	1.70832	0.0390918	0.0356335	0.0769637	0.0694596	0.277221	0.232524	0.534135	0.449536
RCC2	Protein RCC2	Q9P258	SSIIVAADESTISWGPSPTFGELGYGDHKPK	440	0.657671	1.70755	-1.21104	1.0654	0.0958351	0.140678	-1.356	2.39681	-1.19548	3.16356
SMC6	Structural maintenance of chromosomes protein 6	Q96SB8	INQLSELADPLKDELNLADSEVDNQK	787	-1.10013	1.70702	-0.283794	0.206613	-0.862157	0.487904	-0.781157	0.754658	-0.221479	0.156509
RAD50	DNA repair protein RAD50	Q92878	QIITFFSPLTILVGPNGAGK	23	2.11718	1.70691	0.520801	0.21273	-0.763088	0.357528	-0.181014	0.0704155	1.28938	0.869356
CDK1	Cyclin-dependent kinase 1	P06493	IGEGTYGVVYKGR	10	-0.42522	1.70688	-0.579485	1.14994	-0.439482	1.4281	-0.351124	0.833118	-0.313608	0.905167
PSMA3	Proteasome subunit alpha type-3	P25788	IIYIVHDEVKDK	197	-0.41989	1.70643	-0.609508	0.67323	-0.103796	0.279857	0.0120154	0.0285869	0.0710736	0.180417
CRB1	Protein crumbs homolog 1	P82279	FQTVQPMALLLFR	514	1.76759	1.70636	0.387491	0.173248	-0.569961	0.325608	-0.706429	0.501661	0.781978	0.576443
PDLIM2	PDZ and LIM domain protein 2	Q96JY6	GHFWVGDELYCEK	324	0.749513	1.7058	0.422166	0.714246	0.634542	1.4118	0.19209	0.256687	-0.192459	0.148228
ARAF	Serine/threonine-protein kinase A-Raf	P10398	TVVTVRDGMSVYDSLDK	31	-1.31792	1.70565	-0.303179	0.39107	-1.35786	0.898243	-1.19415	0.652695	-1.47026	2.09867
SRPK1	SRSF protein kinase 1	Q96SB4	STAGNFLVNPLEPK	473	-0.192669	1.70547	0.18035	1.02892	0.200849	1.40817	0.363645	2.1953	0.253366	0.87854
ZFR	Zinc finger RNA-binding protein	Q96KR1	QAAAAAAAAAATAAWTGTTFTK	289	0.170414	1.70536	0.0360152	0.145599	-0.0169046	0.0694412	0.0469403	0.288684	-0.0628022	0.161061
GCN1	Stalled ribosome sensor GCN1	Q92616	GEPGAAPLSAPAFSLVFPFLK	966	-2.22902	1.70532	-0.576228	0.372841	-0.885496	0.291952	-0.937981	0.520988	-1.68072	0.822002
UBR4	E3 ubiquitin-protein ligase UBR4	Q5T4S7	AEHASSLLELASTTK	1065	-0.841749	1.70485	-0.724547	0.752897	-0.652674	0.79557	-0.275331	0.206004	-2.48585	0.819953
LEMD3	Inner nuclear membrane protein Man1	Q9Y2U8	TNNHIGGGAFSVDSPR	389	-0.170374	1.70424	-0.0293496	0.172379	-0.061854	0.373262	-0.0158919	0.0714518	0.00335771	0.0169984
BRAT1	BRCA1-associated ATM activator 1	Q6PJG6	CALLASEVPQLALQLLQDPESYVR	539	2.02398	1.70344	0.0968219	0.0434281	0.305607	0.119815	-1.09681	0.828044	0.709165	0.386756
PRPF40A	Pre-mRNA-processing factor 40 homolog A	O75400	TGKDSGNWDTSGSELSEGELEKR	923	0.955617	1.70323	0.856968	1.23291	0.075933	0.0447944	0.0513637	0.0367218	0.357104	0.515151
AKAP1	A-kinase anchor protein 1, mitochondrial	Q92667	YVDYGGYKR	793	-0.891338	1.70302	-0.727941	0.864031	-0.541059	0.706283	-0.749117	0.707394	-0.492064	0.664578
PKP4	Plakophilin-4	Q99569	SSTQMNSYSDSGYQEAGSFHNSQNVSK	145	-0.758477	1.70302	-0.29481	0.323651	-0.172256	0.308794	-0.429014	0.83986	-0.222464	0.40448
MYH11	Myosin-11	P35749	QLLQANPILEAFGNAK	217	0.240719	1.70278	-0.0349319	0.0847773	-0.0108932	0.0400791	0.147971	0.83411	0.245644	0.931624
EPS8L2	Epidermal growth factor receptor kinase substrate 8-like protein 2	Q9H6S3	IWTQEMLLQVNDQSLR	87	1.09516	1.70272	1.58508	2.81305	1.09626	1.26672	1.23219	2.01017	0.919747	0.809674
MYL6B	Myosin light chain 6B	P14649	AEPAVPQAPQK	36	-1.41084	1.70211	0.871089	0.841948	0.48021	0.383861	0.760361	0.651248	0.664132	0.627524
GTPBP10	GTP-binding protein 10	A4D1E9	QISVADLPGLIEGAHMNK	197	-1.49923	1.70208	-0.94586	1.05423	-1.16435	1.22924	-0.617684	1.01527	-0.656933	1.16519
CDYL	Chromodomain Y-like protein	Q9Y232	KIWGSAQGMDSMLK	576	2.10706	1.70162	1.07877	0.828763	0.848586	0.563609	1.6582	1.14935	1.15571	1.03537
CCDC102A	Coiled-coil domain-containing protein 102A	Q96A19	LGLERENK	369	2.21385	1.70005	1.5072	0.881061	0.616725	0.343708	-0.129857	0.0999533	0.14222	0.124998
RELA	Transcription factor p65	Q04206	SPFSGPTDPRPPPRR	316	1.50626	1.69972	0.966011	1.12562	1.48956	1.97151	0.0469227	0.0300503	0.349403	0.155867
PSME1	Proteasome activator complex subunit 1	Q06323	AMLRVQPEAQAK	2	-1.15409	1.69956	-0.958815	1.30138	-0.554166	0.675827	-0.154891	0.148762	-0.0971918	0.0915381
ASDURF	ASNSD1 upstream open reading frame protein	L0R819	GTRPEDSSVLIPTDNSTPHKEDLSSK	5	-0.437475	1.69903	-0.325122	0.907787	-0.373513	0.807754	-0.691025	2.7691	-0.126656	0.219752
MID1IP1	Mid1-interacting protein 1	Q9NPA3	TPPVPDSGSANGSFFAPSR	67	0.715108	1.6986	0.216668	0.402938	0.400058	0.951934	0.0198188	0.0304438	0.0508983	0.0859463
SIPA1L3	Signal-induced proliferation-associated 1-like protein 3	O60292	AHSLGGLDPAFTSTEDLNCK	389	0.369755	1.69856	-0.0191674	0.030348	-0.0220533	0.0342885	-0.287713	0.498229	0.0596742	0.135239
RTN3	Reticulon-3	O95197	SIVEKIQAK	1014	0.380677	1.6978	-0.197322	0.409183	0.148669	0.457563	-0.269155	0.711277	-0.130894	0.152895
AFDN	Afadin	P55196	HKPGIVQETTFDLGGDIHSGTALPTSK	524	-1.37605	1.69745	-0.997021	1.33556	0.0314922	0.0176199	-0.810531	1.96692	-0.561519	1.12906
HUWE1	E3 ubiquitin-protein ligase HUWE1	Q7Z6Z7	ACSPCSSQSSSSGICTDFWDLLVK	3371	0.35093	1.69708	0.0150578	0.0394177	0.138035	0.483778	-0.286796	0.940748	-0.125587	0.272352
INTS1	Integrator complex subunit 1	Q8N201	EGEEVYSWSESQDQVFLR	1136	0.459877	1.69688	-0.0831381	0.144665	-0.0827832	0.167936	-0.254055	0.782021	-0.672526	1.96888
CCDC59	Thyroid transcription factor 1-associated protein 26	Q9P031	TWRPNHPQAFVGSVR	36	0.529045	1.69645	0.19288	0.638241	0.445124	1.78038	0.27091	0.86668	0.30281	0.770743
DNM2	Dynamin-2	P50570	HVFAIFNTEQR	584	-1.3678	1.69629	-0.386226	0.558918	0.0230273	0.0431479	-0.565495	1.02999	-0.0897664	0.135634
HADHA	Trifunctional enzyme subunit alpha, mitochondrial	P40939	KYEAAYGK	735	1.19042	1.69598	0.0429213	0.0335141	0.987528	1.49192	0.530292	0.959097	1.23434	1.43452
THBS1	Thrombospondin-1	P07996	DNCQYVYNVDQR	811	-1.09543	1.69496	-0.538571	0.760684	0.288192	0.326502	-0.0158591	0.0135231	-0.46949	0.551778
CLMN	Calmin	Q96JQ2	NSPSSSLSPGSGGTDSDSSFPPTPTAER	150	-1.92797	1.69495	0.26106	0.377251	-0.141877	0.206395	-0.733307	2.39137	-0.139574	0.195153
MIA3	Transport and Golgi organization protein 1 homolog	Q5JRA6	LPPPTHGPQEYPPPPAVR	1860	-1.17964	1.69484	0.080496	0.222445	-0.181603	0.243829	-0.109336	0.137921	0.023358	0.0732616
AKAP9	A-kinase anchor protein 9	Q99996	FSLNGGANIEAIIASEKEVWNR	3636	-1.73302	1.69453	0.350322	0.318236	-0.000171613	0.000123708	0.24991	0.224707	-0.217327	0.166607
BRCA1	Breast cancer type 1 susceptibility protein	P38398	SSEYPISQNPEGLSADKFEVSADSSTSK	1460	-0.611542	1.69444	-0.117216	0.170187	0.253212	0.529388	0.155951	0.275523	-0.12383	0.14337
MICAL3	[F-actin]-monooxygenase MICAL3	Q7RTP6	ELRLPCPAEGEAELELR	1116	1.24639	1.69426	0.861868	1.37847	0.562119	0.472979	0.0327475	0.0115237	1.86432	4.26585
JMJD1C	Probable JmjC domain-containing histone demethylation protein 2C	Q15652	VAQENSSTFGLQTLQK	521	-1.23285	1.69409	-0.340835	0.472572	-0.300942	0.307373	0.0665745	0.0608201	-0.420594	0.461542
AHNAK	Neuroblast differentiation-associated protein AHNAK	Q09666	GEVDVSLANVEGDLKGPALDIK	3235	2.22407	1.69384	1.6317	0.817041	0.01102	0.00331055	1.37765	0.6856	1.72252	1.07491
RNF213	E3 ubiquitin-protein ligase RNF213	Q63HN8	TLCECKETASK	3977	1.52687	1.69364	0.212663	0.146951	0.441231	0.395359	0.683673	0.672669	1.95719	2.48292
ZNF628	Zinc finger protein 628	Q5EBL2	VFVCDAYLQR	249	-0.488593	1.69337	-0.122343	0.389331	-0.355362	1.56708	-0.012755	0.0427122	-0.148539	0.442436
PPA2	Inorganic pyrophosphatase 2, mitochondrial	Q9H2U2	EENGIPMKK	74	-0.762114	1.69336	-0.03402	0.0869225	-0.0925231	0.364191	0.00634299	0.0206402	-0.0168723	0.0295587
P4HTM	Transmembrane prolyl 4-hydroxylase	Q9NXG6	QALFQQEMAR	467	-0.549519	1.693	-0.402784	1.10865	-0.152658	0.312739	-0.142036	0.496627	-0.996037	0.845284
PPP2R2A	Serine/threonine-protein phosphatase 2A 55 kDa regulatory subunit B alpha isoform	P63151	FECCWNGSDSVVMTGSYNNFFR	346	-2.70149	1.69299	-2.1655	1.26741	-0.846366	0.249073	-1.25791	0.585461	-2.43682	1.47449
HMGN5	High mobility group nucleosome-binding domain-containing protein 5	P82970	EAVAAEVK	117	2.60434	1.69294	1.12245	0.463904	0.782032	0.296284	2.07482	1.06655	1.43344	0.628932
MATR3	Matrin-3	P43243	TEEGPTLSYGRDGR	150	1.06592	1.69292	0.512693	0.630053	0.831229	1.23602	0.189264	0.258596	0.750166	1.21416
CYFIP1	Cytoplasmic FMR1-interacting protein 1	Q7L576	NVIQSVLQAIR	505	-0.142626	1.69292	-0.16758	2.33699	-0.27244	3.11685	-0.138261	0.652972	-0.213848	2.13554
TUBGCP5	Gamma-tubulin complex component 5	Q96RT8	YLSTIHDR	933	-2.48485	1.69253	-0.366907	0.273413	0.300137	0.81614	0.017433	0.0349795	-0.722616	0.479419
WASHC3	WASH complex subunit 3	Q9Y3C0	TVAFLNQFVVHTVQFLNR	26	-0.827737	1.69201	-0.768679	0.729089	-0.137669	0.129356	-0.0501793	0.0603228	-0.29548	0.29133
STK25	Serine/threonine-protein kinase 25	O00506	QSAYDFK	189	-1.34373	1.69199	-0.684058	0.657376	-0.997289	1.15461	-0.897156	1.18894	-0.791092	0.70403
NFKB2	Nuclear factor NF-kappa-B p100 subunit	Q00653	QTTSPSGSLLR	809	0.41005	1.69192	0.145689	0.309461	0.158788	0.424907	0.21602	0.814441	0.092847	0.259567
CUL7	Cullin-7	Q14999	QPQPFLALMQSLDTPETNR	662	-1.86126	1.69118	-0.7981	1.1039	-0.252243	0.536607	-0.790595	0.925273	-0.333953	0.859287
LARP1	La-related protein 1	Q6PKG0	GEPGPNDVR	37	-0.242014	1.69053	-0.357665	1.19756	-0.136707	0.695012	-0.184738	0.695807	-0.208446	1.27556
ALYREF	THO complex subunit 4	Q86V81	ADKMDMSLDDIIKLNR	2	-0.305868	1.69034	-0.0663187	0.266659	-0.192867	1.06411	-0.165584	0.717072	-0.180538	0.790124
ECD	Protein ecdysoneless homolog	O95905	GLIEGSAQYR	348	1.52809	1.69009	0.000225607	8.26426e-05	1.56291	1.78974	1.53493	1.59339	0.825843	0.600172
KIF13B	Kinesin-like protein KIF13B	Q9NQT8	VILNPVNTNLSKGDAR	35	-1.59211	1.68976	-0.950435	0.933175	-1.18404	1.48306	-2.54335	2.76169	-0.424003	0.619171
MICALL2	MICAL-like protein 2	Q8IY33	LAVPASLDVCDNWLRPEPPGQEAR	667	0.53426	1.68974	0.123137	0.229186	0.0396891	0.0702457	-0.132682	0.205631	-0.67894	0.930733
ALYREF	THO complex subunit 4	Q86V81	SLGTADVHFERK	145	-1.25585	1.6896	-0.464766	0.784292	-0.374827	0.502162	-0.330786	0.56373	-0.320392	0.40946
ZMPSTE24	CAAX prenyl protease 1 homolog	O75844	NEEEGNSEEIKAK	304	-1.59934	1.6887	-1.17287	1.0556	-1.2235	1.99669	-0.882506	0.760441	-0.679107	1.12011
LZTS2	Leucine zipper putative tumor suppressor 2	Q9BRK4	GAPSLPSFMGPR	157	-0.869624	1.68853	0.105202	0.426452	0.108022	0.390985	0.00797553	0.0223139	0.0327282	0.072144
DOCK5	Dedicator of cytokinesis protein 5	Q9H7D0	DCENYTEAAYTLLLHAELLQWSDKPCVPHLLQK	1253	-1.26628	1.68818	-1.59505	1.7502	-0.504045	0.375861	-0.97602	1.33745	-0.485298	0.604148
DDR1	Epithelial discoidin domain-containing receptor 1	Q08345	IADFGMSR	782	-0.663992	1.68729	-0.0507717	0.10688	-0.437135	1.21967	-0.456499	1.27295	-0.304082	0.461977
ZC3H14	Zinc finger CCCH domain-containing protein 14	Q6PJT7	LQELGAYVDEELPDYIMVMVANKK	19	-0.761971	1.6872	0.386823	0.352294	0.166825	0.163059	-0.429989	0.545563	-0.00271835	0.00216192
PABPC1	Polyadenylate-binding protein 1	P11940	ALDTMNFDVIKGKPVR	68	-0.369557	1.68701	-0.359915	0.615061	-0.0668082	0.147241	0.0190132	0.0489357	-0.0557461	0.154145
SCO2	Protein SCO2 homolog, mitochondrial	O43819	QVAQASHSYR	197	0.716852	1.68685	-0.0335338	0.0307784	0.257039	0.193295	0.664603	1.44789	0.566955	1.26691
ARPC1A	Actin-related protein 2/3 complex subunit 1A	Q92747	TLESSIQGLR	359	2.64996	1.68644	3.16852	2.39085	2.50204	1.30897	2.14384	0.787351	3.19883	2.55525
SPECC1L	Cytospin-A	Q69YQ0	YMDLAENAR	495	0.990829	1.68637	0.79419	1.32678	-0.0645051	0.0568415	0.269763	0.271519	0.419349	0.237468
INTS9	Integrator complex subunit 9	Q9NV88	LYCLSGHPTLPCNVLK	3	-1.82511	1.6863	0.127248	0.090554	-0.17567	0.156553	0.568477	0.753961	0.387736	1.02977
UQCRC1	Cytochrome b-c1 complex subunit 1, mitochondrial	P31930	FTGSEIR	270	-1.90637	1.6862	0.0278536	0.0682137	-0.676839	0.574444	0.266059	0.788868	0.752326	3.65639
KDM3B	Lysine-specific demethylase 3B	Q7LBC6	MYNAYGLITAEDRR	1540	-0.72681	1.68616	-0.348348	1.26103	-0.181091	0.616838	-0.130589	0.463891	-0.698126	2.54992
PPP1R37	Protein phosphatase 1 regulatory subunit 37	O75864	LTCEGAVAVAEFIAESPR	373	-0.597715	1.6856	-1.25726	0.570758	-0.131972	0.354337	-0.517958	0.796342	-0.233753	0.716574
PRMT1	Protein arginine N-methyltransferase 1	Q99873	QLVTNACLIK	244	1.1739	1.68539	0.0264952	0.0162716	0.271976	0.166739	-0.351946	0.170186	-0.308021	0.186591
AP2A1	AP-2 complex subunit alpha-1	O95782	FFQPTEMAAQDFFQR	864	-1.40394	1.68479	0.965962	0.647832	1.00096	0.838611	0.860293	0.602787	0.347779	0.162304
AP3D1	AP-3 complex subunit delta-1	O14617	DVPVAEEVSALFAGELNPVAPK	589	-1.66728	1.68444	-0.574064	0.367716	0.295468	0.189016	0.293675	0.215442	-0.699007	0.52159
RPS6KC1	Ribosomal protein S6 kinase delta-1	Q96S38	AHELKFFPNDDPEAVSSPR	567	1.2965	1.68439	1.33035	0.877603	1.29387	0.884818	0.508152	0.330455	1.00369	1.10722
DNMBP	Dynamin-binding protein	Q6XZF7	SHSDASVGSHSSTESEHGSSSPR	1351	1.02541	1.68427	0.0539256	0.0341128	0.170265	0.173789	0.0385225	0.0354638	0.0252454	0.0166869
NUMBL	Numb-like protein	Q9Y6R0	LNELPSTLQR	327	0.210842	1.68347	0.208489	1.46917	0.147911	1.39771	0.116047	0.727004	0.0507227	0.167822
SPTAN1	Spectrin alpha chain, non-erythrocytic 1	Q13813	QFQDAGHFDAENIKK	743	1.492	1.68335	-0.285953	0.145849	0.155124	0.0832445	-0.233262	0.108394	-0.34057	0.169695
USP9X	Probable ubiquitin carboxyl-terminal hydrolase FAF-X	Q93008	MQYSMEYFQFMKK	2003	-0.978551	1.68238	-0.0414854	0.039433	0.186749	0.234687	0.585738	0.971019	0.652064	0.688843
PARP1	Poly [ADP-ribose] polymerase 1	P09874	FYTLIPHDFGMK	736	-0.988246	1.68208	-0.206742	0.305216	-0.512949	0.809085	0.325964	0.474932	-0.347474	0.153865
CGN	Cingulin	Q9P2M7	GANDQGASGALSSDLELPENPYSQVK	84	-2.84595	1.68193	0.456375	0.427577	0.457859	0.434177	-0.985235	0.446729	-0.872676	0.278935
SF3B3	Splicing factor 3B subunit 3	Q15393	SVAGGFVYTYK	919	0.860571	1.68002	0.0436404	0.0312699	0.473401	0.699582	0.610657	0.609377	1.04967	2.17883
BCOR	BCL-6 corepressor	Q6W2J9	IANSAGYVGDRFK	966	1.69281	1.67992	1.33538	1.09028	0.367961	0.182007	0.427181	0.217501	0.359552	0.177224
MRPS9	Small ribosomal subunit protein uS9m	P82933	HTAFVIPK	51	-1.17167	1.67942	-0.440686	0.31912	-0.735828	0.825975	-0.151587	0.110941	-0.520814	0.522441
HUWE1	E3 ubiquitin-protein ligase HUWE1	Q7Z6Z7	MVNPTTVLESPHSLPAKLPGGVQNFPQFSALR	1209	-0.593953	1.67939	-0.280634	0.733707	0.089025	0.153163	0.101214	0.13962	0.0135393	0.024934
TRDMT1	tRNA (cytosine(38)-C(5))-methyltransferase	O14717	YALLLDIVQPTCR	276	0.716175	1.67895	-0.0872518	0.109856	-0.326981	0.338678	-0.490497	0.710516	-0.300605	0.381539
TOPBP1	DNA topoisomerase 2-binding protein 1	Q92547	KPSTPLSEVIVK	858	-0.374585	1.67788	-0.26784	1.60935	-0.261662	1.19924	-0.265586	1.29202	-0.24927	1.30926
CDK13	Cyclin-dependent kinase 13	Q14004	DNFGSSSFSSAPYVSNDGLGSSSAPPLER	1337	0.539343	1.67771	0.320669	0.703824	0.28967	0.653997	-0.0655455	0.0797026	0.0452749	0.0596053
MAP2K4	Dual specificity mitogen-activated protein kinase kinase 4	P45985	HPFILMYEER	364	-0.543658	1.67738	0.150389	0.421994	0.290328	1.14791	0.0699745	0.0761014	0.453403	1.8341
KPNA2	Importin subunit alpha-1	P52292	TDCSPIQFESAWALTNIASGTSEQTK	131	0.247016	1.67725	0.267207	1.84007	0.185778	0.884776	0.145868	0.61842	-0.0686483	0.18646
USP8	Ubiquitin carboxyl-terminal hydrolase 8	P40818	STKPVVFSPTLMLTDEEK	445	-0.446093	1.67719	-0.185117	0.231368	-0.0312194	0.0735556	-0.971964	1.5497	-0.250513	0.806157
CTR9	RNA polymerase-associated protein CTR9 homolog	Q6PD62	HQNTEVVLYLAR	714	-0.36248	1.67698	-0.0413949	0.136304	0.0769085	0.188595	0.00262024	0.00567565	-0.0685274	0.145614
RELA	Transcription factor p65	Q04206	ISLVTKDPPHRPHPHELVGK	74	1.70067	1.67632	-0.169124	0.124944	-0.0802807	0.0635132	-0.288812	0.240528	-0.0339581	0.0240353
FAM114A1	Protein NOXP20	Q8IWE2	KFTNSLTTVGSNK	503	-0.45778	1.67603	0.0913563	0.300899	-0.00310061	0.0102122	0.0334877	0.113297	-0.055702	0.12542
ARHGEF1	Rho guanine nucleotide exchange factor 1	Q92888	TAVLRVPVPPNVAFELDR	107	2.51237	1.67589	-0.121316	0.032127	1.73986	0.740758	-0.754231	0.251865	-0.357653	0.104179
SYNE2	Nesprin-2	Q8WXH0	HVLVEDVMVLK	5878	-1.06473	1.67574	0.288769	0.331568	0.454881	0.577937	0.68597	1.5036	0.769271	1.54079
ICE1	Little elongation complex subunit 1	Q9Y2F5	LSFSPENILIQNQDIVR	957	2.15098	1.67554	1.90345	1.39216	2.04306	1.24359	0.790528	0.408711	0.699648	0.33321
RIOK2	Serine/threonine-protein kinase RIO2	Q9BVS4	GQVVENNSVTEFSEEKNR	405	1.07298	1.67445	0.90502	1.68009	-0.0549896	0.0477093	0.55549	0.35231	1.06619	1.59712
GPBP1	Vasculin	Q86WP2	SNSSSPVDKLNQQPR	272	0.874799	1.67421	0.395154	0.49215	0.922531	1.6891	0.728628	1.27032	0.70346	1.21909
MLH1	DNA mismatch repair protein Mlh1	P40692	LDAFLQPLSKPLSSQPQAIVTEDKTDISSGR	393	0.494475	1.67372	0.162925	0.387773	0.163876	0.355847	-0.188593	0.375836	-0.0132812	0.022174
PRPS2	Ribose-phosphate pyrophosphokinase 2	P11908	MVLVGDVKDR	205	-0.968203	1.67367	-0.997968	0.621873	0.0388863	0.0679696	-0.0205242	0.0329859	-0.104404	0.13815
SCRIB	Protein scribble homolog	Q14160	LTNLNVDRNHLEALPPEIGGCVALSVLSLR	314	-1.94402	1.67363	-2.39737	4.19705	-2.0025	1.97199	-1.22873	1.48677	-0.536634	0.44098
IPO9	Importin-9	Q96P70	VKGEEIYSMDEGIR	883	-0.646434	1.67326	-0.0731148	0.125513	0.0169832	0.0289213	-0.0309622	0.0462589	0.101036	0.189725
TACC2	Transforming acidic coiled-coil-containing protein 2	O95359	AQEGESTLEIR	735	-1.37381	1.67323	-0.476855	0.337894	-0.0381536	0.0198212	-0.658231	0.523535	-0.229376	0.148088
HIP1	Huntingtin-interacting protein 1	O00291	AIGEELLPR	762	-0.776742	1.67291	-0.261859	0.425204	0.0373562	0.0684101	-0.240228	0.518956	0.157508	0.300508
VPS16	Vacuolar protein sorting-associated protein 16 homolog	Q9H269	AIESGDTDLVFTVLLHLKNELNR	565	1.09	1.67199	-0.475693	0.564827	0.523743	0.679657	-0.736132	1.04897	0.567158	0.717042
SLX4IP	Protein SLX4IP	Q5VYV7	QHRPSNAEFTR	62	0.554745	1.67155	-0.29208	0.480405	-0.0892576	0.0962721	0.529371	1.36688	-0.667369	1.03889
HS1BP3	HCLS1-binding protein 3	Q53T59	RAVFNEILR	109	-0.354583	1.67149	-0.0407683	0.0866436	-0.140934	0.424613	-0.0544405	0.184784	-0.179412	0.585752
VPS39	Vam6/Vps39-like protein	Q96JC1	ALQVLVDQSKK	518	-3.31153	1.67124	-2.0875	0.465277	-1.06561	0.376394	0.255384	0.0691941	-2.77954	1.02406
PLEC	Plectin	Q15149	AQLEPVASPAK	1428	0.0818646	1.67091	0.0248514	0.293758	0.0756439	1.13792	0.104292	1.98923	0.0799986	1.1462
XRN1	5'-3' exoribonuclease 1	Q8IZH2	MSNKQPNSGIENFLASLNISK	1309	-0.868686	1.67052	-0.762845	1.32241	-0.728352	1.56961	-0.532516	0.85462	-0.396481	0.657956
PPP1R37	Protein phosphatase 1 regulatory subunit 37	O75864	SPPGSPSTPTEQR	544	-1.30586	1.66977	-0.231409	0.171449	0.145276	0.144262	0.30331	0.3854	-0.146394	0.117651
SLC25A11	Mitochondrial 2-oxoglutarate/malate carrier protein	Q02978	NVFNALIR	163	-0.623804	1.66952	-0.0522627	0.0647615	-0.555349	0.661292	-0.191879	0.435175	-0.842981	0.957938
PLEKHA7	Pleckstrin homology domain-containing family A member 7	Q6IQ23	LSIFCEQDRVLQDLEDK	695	-1.08564	1.66949	-0.0268764	0.0327669	-0.315576	0.359863	0.0200106	0.0182028	0.175349	0.278152
IWS1	Protein IWS1 homolog	Q96ST2	DLEQMPQR	708	0.142224	1.66913	-0.00225769	0.0150396	-0.0331887	0.222567	0.108211	1.23145	0.0605169	0.536688
EIF4B	Eukaryotic translation initiation factor 4B	P23588	VAPAQPSEEGPGRKDENK	512	-1.12622	1.66908	0.596063	0.815029	1.01923	2.14494	0.843598	1.70142	0.908027	1.90711
LCOR	Ligand-dependent corepressor	Q96JN0	EGFGHSTSLKVPLAR	141	-0.727835	1.6684	-0.235039	0.412781	-0.122327	0.178323	0.0608013	0.106556	-0.474749	0.555873
TRIM33	E3 ubiquitin-protein ligase TRIM33	Q9UPN9	TSLSFKSDQVK	764	1.28182	1.66839	1.31149	1.49157	0.611644	0.544648	0.74137	0.760072	0.505892	0.500195
SNRPD2	Small nuclear ribonucleoprotein Sm D2	P62316	GDSVIVVLRNPLIAGK	103	-1.05557	1.66828	-0.381524	0.479756	-0.0698866	0.103603	0.126512	0.216713	0.303576	0.421042
ZNF385A	Zinc finger protein 385A	Q96PM9	FNSQSQAEAHYKGNR	83	0.698602	1.66759	0.0519595	0.062553	0.17433	0.294513	0.0731418	0.102388	0.0843634	0.100723
THOC2	THO complex subunit 2	Q8NI27	LYINHTPPPLSK	1438	0.611254	1.66698	0.0794107	0.113653	0.414261	1.02904	-0.209818	0.290074	-0.217582	0.311952
NUP98	Nuclear pore complex protein Nup98-Nup96	P52948	SPDRLADINYEGR	839	1.64955	1.66677	0.778693	0.462353	1.70817	1.40654	1.71249	1.34017	1.74947	1.38081
PLEC	Plectin	Q15149	QYDIDDAIAK	4339	0.246356	1.66676	0.0394545	0.153405	0.124832	0.724354	0.258953	2.66624	0.164788	0.713984
DPF2	Zinc finger protein ubi-d4	Q92785	NRPGLSYHYAHSHLAEEEGEDKEDSQPPTPVSQR	220	0.654626	1.66655	0.0568046	0.0622585	0.460997	1.14988	-0.144261	0.206632	-0.0178237	0.02117
TRPS1	Zinc finger transcription factor Trps1	Q9UHF7	GGNFPSFPHDEVTDR	94	0.263057	1.66653	-0.0524792	0.144859	0.244022	1.20862	-0.0480208	0.205394	-0.0984078	0.372961
IRAK4	Interleukin-1 receptor-associated kinase 4	Q9NWZ3	GYVNNTTVAVK	203	0.381011	1.66649	-0.0626	0.101169	-0.0557806	0.146579	-0.104898	0.309208	-0.926213	1.53228
MISP	Mitotic interactor and substrate of PLK1	Q8IVT2	AFNKPHLANGHVVPIKPQVK	233	0.610048	1.66605	-0.0306348	0.0478021	0.0554153	0.106353	0.0331228	0.0573541	0.0612949	0.0792543
PMS1	PMS1 protein homolog 1	P54277	EDIQDIIYR	895	1.25349	1.66572	0.862951	0.697324	1.47494	1.19087	1.19134	0.777715	0.880081	0.60684
PDCD11	Protein RRP5 homolog	Q14690	VIHLSLAPK	1821	-1.19614	1.66559	-0.57596	0.733416	-0.174404	0.135	-0.427193	0.609759	-0.182887	0.108762
ATR	Serine/threonine-protein kinase ATR	Q13535	KAGHHQTAYNALLNAGESR	1933	-1.5104	1.66511	0.0950547	0.125832	-0.315311	0.231177	-0.375402	0.334986	-0.276257	0.282112
GTF2F1	General transcription factor IIF subunit 1	P35269	TTPNSGDVQVTEDAVR	445	-0.197977	1.66501	0.0063127	0.0281591	0.0532961	0.31156	-0.0015901	0.00594881	-0.00852173	0.0435066
AKIRIN2	Akirin-2	Q53H80	LAEQYDAFVK	175	0.775249	1.66487	0.12601	0.133242	0.424012	0.612711	0.83021	1.88669	0.620278	1.11119
CYTH2	Cytohesin-2	Q99418	LREELSEAMSEVEGLEANEGSK	36	0.707089	1.66448	0.225222	0.350734	0.109098	0.106781	0.106894	0.149139	0.345812	0.796785
ALYREF	THO complex subunit 4	Q86V81	QLPDKWQHDLFDSGFGGGAGVETGGK	82	0.197073	1.66429	0.0431806	0.233949	-0.0158521	0.0544722	-0.00331772	0.0107821	-0.0251471	0.0690609
INTS6	Integrator complex subunit 6	Q9UL03	HKRPGEPNMQGIPK	642	-1.21187	1.6634	-0.176857	0.194668	-1.17419	1.10269	-0.877689	0.731104	-0.41088	0.383989
TRIP11	Thyroid receptor-interacting protein 11	Q15643	QIMEECENLKLECSK	345	-0.558901	1.66291	-0.0467655	0.0980072	-0.122625	0.323255	-0.49076	1.28511	-0.121435	0.238006
GPHN	Gephyrin	Q9NQX3	GTHMGPSEIGLLATVGVTEVEVNK	474	1.81169	1.66259	1.15729	0.979141	1.54612	0.728882	0.961825	0.404882	1.35707	0.850297
WEE1	Wee1-like protein kinase	P30291	YTTEFHELEK	295	0.372934	1.66155	0.158804	0.395748	0.158717	0.519507	-0.064112	0.0981048	0.141721	0.370164
YWHAQ	14-3-3 protein theta	P27348	DYREKVESELR	81	-0.241961	1.66116	-0.0802229	0.591252	-0.167387	0.865357	-0.125476	0.941824	-0.0154541	0.0877108
JUP	Junction plakoglobin	P14923	SAIVHLINYQDDAELATR	125	-0.215801	1.66111	-0.08407	0.380538	0.0510967	0.242999	-0.0489625	0.17542	0.0826592	0.406975
PPP2R5E	Serine/threonine-protein phosphatase 2A 56 kDa regulatory subunit epsilon isoform	Q16537	MVSCNIFR	118	-0.335325	1.66067	-0.0716016	0.192075	-0.0868291	0.439936	0.0626409	0.332545	0.173761	0.584158
NRDE2	Nuclear exosome regulator NRDE2	Q9H7Z3	SDSGSQCPLLWR	1082	0.347978	1.66043	0.00929507	0.029159	0.0155302	0.0238299	0.0299281	0.0639894	-0.739576	0.542519
TOE1	Target of EGR1 protein 1	Q96GM8	AAGSPHLTLEFCNYPSSMR	260	-0.31629	1.6604	-0.0921056	0.206945	-0.0322721	0.0897643	0.165631	0.727825	0.353552	1.4392
CSTF2	Cleavage stimulation factor subunit 2	P33240	SLGTGAPVIESPYGETISPEDAPESISK	103	0.178706	1.65973	-0.0191693	0.0849938	-0.0575549	0.474224	-0.142381	1.26702	-0.158271	1.16669
AUP1	Lipid droplet-regulating VLDL assembly factor AUP1	Q9Y679	GTQSLPTASASKFPSSGPVTPQPTALTFAK	348	-2.03787	1.65926	-0.213014	0.291856	-0.225593	0.492766	-0.747369	0.54029	-1.18379	0.973882
CIT	Citron Rho-interacting kinase	O14578	QLDEASGANDEIVQLR	973	0.885024	1.6589	0.062631	0.0624611	0.380868	0.4399	0.259725	0.338326	0.043951	0.0328986
FOXK1	Forkhead box protein K1	P85037	SQEEPGKGSFWR	369	0.1909	1.65872	0.113109	1.02339	0.128367	0.939653	0.141665	0.810902	-0.0314352	0.0725004
DNMT1	DNA (cytosine-5)-methyltransferase 1	P26358	ACQLSVVVDDK	1338	1.64095	1.65866	0.349841	0.327201	0.522874	0.168927	0.424664	0.496549	1.73609	1.53584
RNF213	E3 ubiquitin-protein ligase RNF213	Q63HN8	IPLFLVGKPGSSK	2763	-1.56045	1.65811	-0.620757	0.55993	0.0406008	0.029464	0.308588	0.404369	0.59266	0.554162
EPPK1	Epiplakin	P58107	HILRPGTALVLLEAQAATGFIIDPVENR	1594	-1.16454	1.6571	-0.626815	0.856141	-0.335809	0.390288	-0.359788	0.35213	-0.000350232	0.000304854
BABAM2	BRISC and BRCA1-A complex member 2	Q9NXR7	FLLKLPVDFSNIPTYLLK	173	-2.11731	1.65608	-0.553209	0.674733	-0.297776	0.404333	-0.348166	0.220152	-0.222682	0.168893
DDX3X	ATP-dependent RNA helicase DDX3X	O00571	MSHVAVENALGLDQQFAGLDLNSSDNQSGGSTASK	1	-6.06405	1.65557	-0.116783	0.428037	-2.20542	0.632023	-0.620181	0.576615	-0.469446	2.28824
TICAM1	TIR domain-containing adapter molecule 1	Q8IUC6	SLPRPIDGVSDWSQGCSLR	177	-0.468405	1.6549	-1.24461	0.837767	-0.0712848	0.138471	-1.46213	0.875915	-0.413074	1.42173
DUS1L	tRNA-dihydrouridine(16/17) synthase [NAD(P)(+)]-like	Q6P1R4	PKLQGFEFWSR	2	-0.797799	1.65488	-0.0482954	0.0624511	-0.225617	0.268764	-0.0640991	0.0684276	-0.304116	0.355112
TOMM34	Mitochondrial import receptor subunit TOM34	Q15785	APKFPDSVEELR	2	0.511189	1.65458	0.309694	0.878708	-0.183077	0.279246	0.0794599	0.122962	0.288707	0.653912
CHAMP1	Chromosome alignment-maintaining phosphoprotein 1	Q96JM3	SALFSESQK	566	0.296675	1.65445	-0.328189	0.790792	-0.329722	0.841909	-0.0336937	0.0741612	0.0212078	0.0523083
POLD1	DNA polymerase delta catalytic subunit	P28340	DNCPLVANLVTASLR	835	0.290541	1.65388	0.310122	2.14219	0.158197	0.902432	0.144324	0.638791	-0.0222884	0.0738143
SOX13	Transcription factor SOX-13	Q9UN79	MSSCVPRPPSHGGPTR	315	0.67373	1.65315	0.645767	1.1298	0.596417	1.10707	0.505487	1.10493	0.290432	0.28991
CWF19L1	CWF19-like protein 1	Q69YN2	KPPQPPGPCWFCLASPEVEK	320	-0.965739	1.65282	-0.466302	0.503654	-0.014716	0.0165813	-0.175269	0.225894	0.094101	0.162919
TCERG1	Transcription elongation regulator 1	O14776	KLIVAYVDDLDRR	1069	-0.544951	1.65157	-0.535287	0.818944	-0.0555469	0.059576	-0.413142	0.495075	-0.154048	0.204201
PPHLN1	Periphilin-1	Q8NEY8	QDCETFGMVVK	307	0.688377	1.65128	0.707413	1.23744	0.602377	1.11337	-0.372054	0.150359	-1.07722	0.385866
PPP2R1A	Serine/threonine-protein phosphatase 2A 65 kDa regulatory subunit A alpha isoform	P30153	AVGPEITKTDLVPAFQNLMK	273	-0.266603	1.65061	-0.00352835	0.0144616	0.221467	1.73653	0.0553557	0.290456	0.41043	2.91118
XRCC5	X-ray repair cross-complementing protein 5	P13010	YAPTEAQLNAVDALIDSMSLAKK	444	-0.248853	1.65039	-0.0407027	0.146286	-0.0706889	0.34479	-0.163657	0.651113	-0.25776	1.0857
DIAPH1	Protein diaphanous homolog 1	O60610	VQLNVFDEQGEEDSYDLKGR	360	-1.05383	1.65002	0.0080445	0.00578949	0.0344384	0.0363108	-0.504463	0.52881	-0.276638	0.276388
HUWE1	E3 ubiquitin-protein ligase HUWE1	Q7Z6Z7	HQPTLKTDATTAIIK	669	0.32012	1.64983	0.0580823	0.154496	0.202329	0.673777	-0.07922	0.184979	-0.194095	0.390215
AHCTF1	Protein ELYS	Q8WYP5	CAVPVETEWLK	1261	0.189198	1.64895	-0.0488674	0.20686	-0.036624	0.13495	0.105893	0.744317	-0.0938513	0.244741
NUP155	Nuclear pore complex protein Nup155	O75694	LYGEFADPFKLAECK	1188	0.265491	1.64877	-0.0896437	0.190664	0.0121241	0.0640225	0.119084	1.01298	-0.0405267	0.179779
VPS18	Vacuolar protein sorting-associated protein 18 homolog	Q9P253	QEEALAEFLQR	465	0.221273	1.64869	-0.0786955	0.301533	-0.0561368	0.235118	0.0453267	0.224909	-0.00415118	0.0183622
PRKAR1A	cAMP-dependent protein kinase type I-alpha regulatory subunit	P10644	EYFERLEKEEAK	52	-1.44202	1.64863	-0.47752	0.585672	-0.243775	0.229988	-0.142245	0.205495	-0.0755975	0.130643
DDX31	Probable ATP-dependent RNA helicase DDX31	Q9H8H2	HSLAEILR	781	-0.277337	1.64843	-0.296351	1.32653	-0.458955	2.1909	-0.391674	2.74174	-0.577665	1.37454
NASP	Nuclear autoantigenic sperm protein	P49321	AKLVPSQEETKLSVEESEAAGDGVDTK	416	-0.6703	1.64748	-0.0996607	0.381998	-0.243079	0.520804	-0.509612	2.39408	-0.217167	1.01914
THOC1	THO complex subunit 1	Q96FV9	NEGCPSFVK	393	0.60976	1.64734	-0.165958	0.180208	0.168543	0.274599	0.610936	1.65985	0.173553	0.177335
DOCK6	Dedicator of cytokinesis protein 6	Q96HP0	VTYFDRNYGLR	1838	-0.679321	1.64728	0.0924092	0.0863025	0.19168	0.37689	0.336801	0.356361	0.434839	1.34767
TCF3	Transcription factor E2-alpha	P15923	GTSQYYPSYSGSSR	145	0.340018	1.64689	0.433055	2.24942	0.223888	0.789313	0.267306	1.37467	0.0916406	0.163667
ARFIP1	Arfaptin-1	P53367	NPAMEKLELVR	119	0.754947	1.6463	-1.3882	1.41114	-0.285221	0.290966	0.118415	0.0895242	0.111436	0.0966365
POLR1A	DNA-directed RNA polymerase I subunit RPA1	O95602	DLDNAGELGR	1376	0.204248	1.64557	0.0806077	0.505088	0.127709	0.898609	0.165183	0.931471	0.145577	0.87004
LCP1	Plastin-2	P13796	EGESLEDLMKLSPEELLLR	254	1.37195	1.6451	0.910827	0.699969	1.28612	1.37827	-0.0696348	0.0364154	1.0326	1.07719
NIBAN2	Protein Niban 2	Q96TA1	HCNNGIPEDSKVEGPAFTDAIR	193	-0.36035	1.64488	-0.0613113	0.166952	0.0904814	0.349644	-0.0162761	0.034397	0.308684	0.596334
TNKS1BP1	182 kDa tankyrase-1-binding protein	Q9C0C2	ALPAKPALPAKPSLLVPVGPRPPRGPLAELPSAR	46	-3.05214	1.64484	0.420464	0.221354	0.547414	0.305857	0.43441	0.226608	0.119058	0.0460261
MRE11	Double-strand break repair protein MRE11	P49959	IMSQSQVSKGVDFESSEDDDDDPFMNTSSLR	674	-0.919783	1.64414	-0.103367	0.195309	0.173305	0.441018	-0.0594304	0.0869374	-0.289467	0.376526
NCOR2	Nuclear receptor corepressor 2	Q9Y618	HLAPNPTYPHLYPPYLIR	1654	1.65411	1.64383	0.697955	0.4479	0.779102	0.510786	1.21158	0.988962	0.68158	0.422612
TDP1	Tyrosyl-DNA phosphodiesterase 1	Q9NUW8	LKEEEDEYETSGEGQDIWDMLDK	138	-1.1136	1.64304	-0.0778705	0.0581078	-0.788853	0.320749	-0.64464	0.265882	0.404531	0.407364
CAMK2G	Calcium/calmodulin-dependent protein kinase type II subunit gamma	Q13555	TAPSAGMQPQPSLCSSAMRK	408	-1.41378	1.64302	-1.16674	0.544727	-0.778103	0.754298	-0.376194	0.240084	-1.28354	1.52238
UFC1	Ubiquitin-fold modifier-conjugating enzyme 1	Q9Y3C8	LKEEYQSLIR	32	-0.337148	1.64267	-0.140684	0.54906	0.0856625	0.36561	0.10888	0.688912	0.226334	1.52767
LEMD3	Inner nuclear membrane protein Man1	Q9Y2U8	LETSVQGGGGLAMNDR	306	-1.22062	1.64255	-0.457877	0.645217	-0.719993	1.38056	-0.759382	0.986608	-0.864852	0.985954
CDC42BPG	Serine/threonine-protein kinase MRCK gamma	Q6DT37	LQCLEQEKVELSR	419	1.31188	1.64223	0.317254	0.266267	-0.108405	0.0813495	0.157662	0.133192	-0.0671703	0.0482907
NCKAP1	Nck-associated protein 1	Q9Y2A7	KFPAVETR	63	0.753442	1.64186	0.245954	0.276138	0.0692786	0.0579318	0.315679	0.456949	0.606482	1.1244
NOM1	Nucleolar MIF4G domain-containing protein 1	Q5C9Z4	EIIHVLMDCCLQEK	688	-1.49262	1.64183	-1.00182	0.588467	0.31206	0.134435	-1.24717	0.755395	-0.00270356	0.000973938
HUWE1	E3 ubiquitin-protein ligase HUWE1	Q7Z6Z7	SVLEDMEDSVLAVMPPDIAAEAQALR	3072	-0.522924	1.64169	-0.456734	1.08702	-0.802275	2.50325	-0.343191	0.442289	-1.29009	1.06313
PCIF1	mRNA (2'-O-methyladenosine-N(6)-)-methyltransferase	Q9H4Z3	EEASLLSHSPGTSNQSQPCSPKPIR	11	0.51935	1.64152	-0.08585	0.150269	0.0600534	0.134012	-0.392684	1.09384	-0.220156	0.254416
SPOUT1	Putative methyltransferase C9orf114	Q5T280	HQDLQFAGLLNPLDSPHHMR	163	-1.0938	1.64129	-0.190466	0.245596	-0.0997554	0.0956277	0.041584	0.0512821	-0.0889577	0.0821141
WDR59	GATOR2 complex protein WDR59	Q6PJI9	LLDPANTQQFDDFKK	850	-1.93111	1.64126	-0.82578	0.7993	-0.700299	0.766146	-0.119974	0.121687	-0.00156911	0.00158174
ELMO3	Engulfment and cell motility protein 3	Q96BJ8	DAIPQLIQLDQAKPLAAVLK	16	0.432659	1.64102	0.497233	1.97536	0.146288	0.27317	0.0208928	0.0419197	0.278786	0.731435
ASS1	Argininosuccinate synthase	P00966	NPWSMDENLMHISYEAGILENPK	177	1.43188	1.64092	0.547054	0.40326	1.10009	1.14766	1.17632	1.23658	1.36732	1.48352
ARHGAP32	Rho GTPase-activating protein 32	A7KAX9	SSSDALSASFNGEMLGNR	730	1.33911	1.64077	0.216543	0.10512	1.89241	2.35802	0.138558	0.0578801	1.21032	1.68493
MKS1	Tectonic-like complex member MKS1	Q9NXB0	IVTWEPSEEFVR	181	0.475052	1.64055	0.189958	0.550628	-0.078542	0.0948157	0.203624	0.530612	0.137466	0.377146
ARNT	Aryl hydrocarbon receptor nuclear translocator	P27540	FSEIYHNINADQSK	557	0.677837	1.63973	-0.200426	0.271867	-0.973625	1.46528	-0.456233	0.419764	-0.784928	0.926527
TCEA1	Transcription elongation factor A protein 1	P23193	MTAEEMASDELKEMR	223	-0.612335	1.63965	0.138901	0.234397	0.43004	1.121	0.370051	0.726734	0.260113	0.394413
RBM22	Pre-mRNA-splicing factor RBM22	Q9NW64	NRPHICSFWVK	160	0.764713	1.63952	0.542105	1.08153	0.303967	0.443738	0.306065	0.248839	-0.22115	0.165711
SYMPK	Symplekin	Q92797	LSAQGQAISVVGSLSSMSPLEEEAPQAK	493	-0.867588	1.63925	-0.774201	1.18584	-0.365675	0.544631	-0.487541	0.603687	-1.52436	0.760289
TRERF1	Transcriptional-regulating factor 1	Q96PN7	DGLGLPVGSK	63	-0.306445	1.63916	0.0699743	0.275318	-0.0589889	0.22869	0.047704	0.175246	-0.513368	0.595146
PBRM1	Protein polybromo-1	Q86U86	GSLGEERNPTSK	318	-0.598424	1.63913	-0.285547	0.522678	-0.527724	1.36778	-0.244991	0.608491	-0.216774	0.436648
YTHDF2	YTH domain-containing family protein 2	Q9Y5A9	TKNGIAGSSLPPPPIK	255	0.846313	1.63858	0.340891	0.487762	0.419977	0.575072	0.720806	1.87247	-0.362044	0.376988
ELOB	Elongin-B	Q15370	TTIFTDAK	12	1.49974	1.63808	0.863755	0.790856	0.517947	0.314834	0.685945	0.57894	-0.392478	0.20844
PRC1	Protein regulator of cytokinesis 1	O43663	TQVELMRK	105	-1.32642	1.63806	-0.830872	0.905926	-0.871577	1.25655	-1.00429	1.56916	-0.601889	0.564518
LCP1	Plastin-2	P13796	AECMLQQAER	334	0.980758	1.63787	0.595292	0.769455	0.361002	0.306189	0.120766	0.0886329	0.737212	0.850862
ZNFX1	NFX1-type zinc finger-containing protein 1	Q9P2E3	LWLQLYQADTRR	936	-0.593631	1.63763	-0.196552	0.337841	-0.457403	0.900901	-0.968853	0.727787	-0.874357	0.695564
KIFC1	Kinesin-like protein KIFC1	Q9BW19	DLLATGTRK	471	0.758839	1.63746	-0.508541	0.633327	-0.237976	0.167885	0.219692	0.328408	0.18623	0.173305
DDX46	Probable ATP-dependent RNA helicase DDX46	Q7L014	VTYVVLDEADRMFDMGFEPQVMR	523	-0.445322	1.63728	-0.0185766	0.065349	-0.0241411	0.0579637	-0.125765	0.477706	-0.380685	1.35207
PHF8	Histone lysine demethylase PHF8	Q9UPP1	LVEDIFQQNVGKTSNIFGLQR	475	-1.24934	1.63681	-0.829758	0.643918	-0.481463	0.331044	0.62113	0.645325	-0.461563	0.239766
VAV3	Guanine nucleotide exchange factor VAV3	Q9UKW4	YTETLESIEK	207	1.87789	1.63667	1.31402	1.89915	1.02331	1.13347	1.3432	1.55997	1.47821	1.26395
AHCTF1	Protein ELYS	Q8WYP5	TDTPIESFPTVFAISWGQVK	791	2.03953	1.6365	0.0520568	0.0201366	0.316668	0.130464	0.210678	0.104238	-0.214274	0.0676298
CTNNA1	Catenin alpha-1	P35221	VIHVVTSEMDNYEPGVYTEK	552	-0.195252	1.63624	-0.0301624	0.110843	0.0884416	0.398691	0.0242478	0.0746493	0.208258	0.580334
C11orf52	Uncharacterized protein C11orf52	Q96A22	VLQQQGSQER	56	0.70078	1.63489	-0.369931	0.3792	-0.144716	0.197506	0.467297	1.06641	-0.0740622	0.0748372
NSUN4	5-methylcytosine rRNA methyltransferase NSUN4	Q96CB9	ILHSYVPEEIRDGNQVR	216	0.578935	1.63461	0.601697	1.62206	0.621655	1.15232	0.647303	1.61524	0.83321	1.87467
CES2	Cocaine esterase	O00748	FTEEEEQLSR	476	-0.608276	1.6345	0.256074	0.839506	0.419244	1.97876	0.0722127	0.19214	-0.133917	0.129574
YY1AP1	YY1-associated protein 1	Q9H869	VAEPQANFNTPQALR	94	-0.641004	1.63439	-0.46651	1.39481	-0.324008	0.770936	-0.512663	1.0885	-0.256825	0.324569
GATD3B	Putative glutamine amidotransferase-like class 1 domain-containing protein 3B, mitochondrial;Glutamine amidotransferase-like class 1 domain-containing protein 3, mitochondrial	A0A0B4J2D5	NLSTFAVDGK	142	-0.35419	1.63399	0.00448823	0.0120094	-0.0329801	0.0980849	-0.107053	0.315203	-0.0128034	0.0457129
BCL9L	B-cell CLL/lymphoma 9-like protein	Q86UU0	EAGTPSLDSEAK	126	0.125175	1.63377	-0.0170515	0.130906	0.00103748	0.00806059	0.0593066	0.557405	0.00173367	0.0110842
N4BP1	NEDD4-binding protein 1	O75113	TGGIIVTNDNFR	715	-0.217661	1.6335	-0.113108	0.795021	-0.0901044	0.550929	-0.116598	0.839693	-0.0421843	0.230213
MORF4L2	Mortality factor 4-like protein 2	Q15014	SAENPPSGSVR	63	-0.460669	1.63331	-0.327645	0.996907	-0.0111192	0.0349572	-0.225513	0.594238	-0.142644	0.453709
GPATCH1	G patch domain-containing protein 1	Q9BRR8	GLDPHQALFGTSGEHFNLFSGGSER	240	-0.829452	1.63308	-0.754948	1.45386	-0.0464447	0.028895	-1.21899	2.28702	-0.948838	1.70339
IFRD2	Interferon-related developmental regulator 2	Q12894	LTLADALEK	117	-0.704461	1.63286	-0.24592	0.434956	-0.974632	0.808298	-0.457332	1.28456	-0.0272545	0.0498143
NSUN2	RNA cytosine C(5)-methyltransferase NSUN2	Q08J23	LFEHYYQELK	47	0.124983	1.63267	-0.00852952	0.0607518	0.0430032	0.471626	0.0859021	1.27479	0.111374	1.52825
PFDN6	Prefoldin subunit 6	O15212	LLGPVLVK	59	-0.197341	1.63237	-0.123573	0.567658	0.0558736	0.220217	0.00212036	0.00746501	0.0862326	0.398895
SMARCC1	SWI/SNF complex subunit SMARCC1	Q92922	LRHFEELETIMDREK	911	1.53212	1.63234	0.629248	0.427448	1.1449	0.977778	0.821533	0.64986	1.1488	1.0931
JADE3	Protein Jade-3	Q92613	SCVLGIYPQCVLCPKK	246	-1.44383	1.63191	0.889454	0.673973	0.579556	0.304314	1.16402	1.09292	0.838038	0.567211
SMS	Spermine synthase	P52788	ADGETILK	17	0.417553	1.63154	-0.0430297	0.0661631	-0.126068	0.31347	0.127806	0.329749	0.087546	0.144144
YEATS2	YEATS domain-containing protein 2	Q9ULM3	TPTSTPVHVK	478	-1.04544	1.63135	-0.357715	0.725065	-0.37063	0.639417	-1.02487	1.34921	-1.21545	2.013
HDLBP	Vigilin	Q00341	MVADLVENSYSISVPIFK	573	-0.299118	1.63129	0.0599213	0.181896	-0.00403406	0.00926237	-0.111043	0.415651	0.0335299	0.09273
SH3BP4	SH3 domain-binding protein 4	Q9P0V3	TAWLNHR	285	-0.703009	1.63058	0.0817854	0.130022	-1.06334	0.53138	0.205235	0.471672	-0.108544	0.24746
PKM	Pyruvate kinase PKM	P14618	APIIAVTRNPQTAR	448	-0.171373	1.63025	-0.0990786	0.801982	-0.0582495	0.41009	-0.0552449	0.31853	0.0977618	0.285628
ZNF654	Zinc finger protein 654	Q8IZM8	FLNESTLENNAGNLKR	473	0.592293	1.63008	0.297756	0.534296	0.586587	1.42492	0.592775	1.52053	0.581406	1.45871
BICD2	Protein bicaudal D homolog 2	Q8TD16	RLSHELAETTR	28	1.04495	1.62982	0.054281	0.0546997	-0.0888409	0.139802	-0.38948	0.519625	-0.11564	0.135998
CLASP1	CLIP-associating protein 1	Q7Z460	SLLLAGAAEYDNFFQHLR	350	-1.3313	1.62971	-1.97591	1.71242	-1.3828	0.624745	-0.416453	0.440106	0.301018	0.173755
CACYBP	Calcyclin-binding protein	Q9HB71	TDTVLILCR	147	-2.9103	1.62953	-2.17103	1.67277	-0.117863	0.133143	-1.25683	0.70259	0.636447	1.49911
CS	Citrate synthase, mitochondrial	O75390	EGSGIGAIDSNLDWSHNFTNMLGYTDHQFTELTR	223	1.59986	1.62931	0.693665	0.533441	0.883434	0.797804	1.11654	0.907399	1.45845	1.84813
ETHE1	Persulfide dioxygenase ETHE1, mitochondrial	O95571	LSGAQADLHIEDGDSIRFGR	105	1.1259	1.62904	0.404293	0.433445	-0.251349	0.0759619	-0.0819131	0.063207	0.76696	0.79818
ARHGAP1	Rho GTPase-activating protein 1	Q07960	YNMGLPVDFDQYNELHLPAVILK	297	-0.500038	1.62898	-0.0961576	0.278859	0.134906	0.42484	0.0563329	0.0810507	0.130713	0.256913
CAPN1	Calpain-1 catalytic subunit	P07384	LPPGEYVVVPSTFEPNKEGDFVLR	489	-0.738431	1.62842	0.0410703	0.0529598	-0.710798	0.815079	-0.484083	0.510076	-0.328016	0.457305
CLU	Clusterin	P10909	TLLSNLEEAKK	69	-1.53087	1.62842	-0.369438	1.02533	-0.24442	0.371971	-0.0484072	0.0833255	-0.0299135	0.0479252
INTS11	Integrator complex subunit 11	Q5TA45	MEFLKQK	420	-1.42589	1.6282	-0.219079	0.388662	-0.0354342	0.0519032	-0.584217	1.22072	-0.446779	0.520571
ALMS1	Centrosome-associated protein ALMS1	Q8TCU4	TGINILPSNSYPQR	1841	1.55941	1.62817	0.605592	0.426394	0.839858	0.669024	0.600961	0.359073	0.0308931	0.0125497
TPR	Nucleoprotein TPR	P12270	NKELEIAQDR	96	0.127839	1.62752	0.0334279	0.308775	0.0602852	0.689771	0.102309	1.32584	0.0686266	0.773176
TAGLN2	Transgelin-2	P37802	TLMNLGGLAVARDDGLFSGDPNWFPK	128	1.84576	1.62683	2.04654	1.80898	0.907346	0.486803	0.912759	0.476797	1.09554	0.573163
TASOR	Protein TASOR	Q9UK61	SSHSLDYDK	670	-1.01445	1.62678	-0.268412	0.275719	-0.642999	0.961414	-0.832675	1.13574	-0.508062	0.59686
ILF3	Interleukin enhancer-binding factor 3	Q12906	VPTWGPLRGWPLELLCEK	240	-0.856484	1.62677	-0.758352	1.1615	-0.108445	0.11023	0.507199	0.743519	-0.620563	0.869288
TANGO6	Transport and Golgi organization protein 6 homolog	Q9C0B7	LLTPAEEVLTEEER	239	0.74672	1.62633	0.723959	1.33415	0.636356	1.33528	0.491739	0.883107	0.335291	0.528637
MYH9	Myosin-9	P35579	LKSMEAEMIQLQEELAAAER	1675	-0.247705	1.62599	0.0212742	0.0652655	0.0263734	0.112574	-0.130674	0.5928	-0.0677707	0.27609
GNB1	Guanine nucleotide-binding protein G(I)/G(S)/G(T) subunit beta-1	P62873	ELAGHTGYLSCCR	138	-0.342611	1.62584	-0.0224741	0.0711405	-0.033499	0.107372	0.0448859	0.17819	0.0896966	0.439536
SAFB2	Scaffold attachment factor B2	Q14151	SKGEPVISVK	577	0.901305	1.62517	-0.746866	0.511234	-0.013427	0.0103399	-1.17146	1.35703	-0.729497	0.904229
PLEC	Plectin	Q15149	KELIPTEEALR	3925	-0.352044	1.62498	-0.235459	1.06763	-0.215878	0.445378	-0.133965	0.204113	0.115551	0.523093
GTPBP3	tRNA modification GTPase GTPBP3, mitochondrial	Q969Y2	DVLETPVDLAGFPVLLSDTAGLR	286	-2.79983	1.62495	-0.843164	0.373513	0.179793	0.0657517	0.556815	0.296627	-1.25574	0.493631
CHD1	Chromodomain-helicase-DNA-binding protein 1	O14646	RAETHENEPGPLTVGDELLSQFK	998	1.19286	1.62446	1.37366	1.27139	1.23436	1.08241	0.733933	0.585881	-0.23055	0.130903
TRIQK	Triple QxxK/R motif-containing protein	Q629K1	DAATIKLPVDQYR	5	-1.81403	1.62444	-1.28272	1.01239	-1.52945	1.0417	-0.954677	0.536898	-0.910649	0.452911
ARID4A	AT-rich interactive domain-containing protein 4A	P29374	VVSVVSATER	178	-0.382746	1.62435	-0.123611	0.591219	-0.0647268	0.393107	-0.0604943	0.327644	-0.0354827	0.116691
BCAM	Basal cell adhesion molecule	P50895	QGWVSSSLTLK	500	0.251044	1.62432	-0.0131732	0.0590023	-0.00921618	0.0242384	0.0937888	0.363565	-0.253134	0.330634
PFKFB2	6-phosphofructo-2-kinase/fructose-2,6-bisphosphatase 2	O60825	NSFTPLSSSNTIR	465	0.332085	1.62369	0.180356	0.741452	0.209065	0.876012	0.283731	1.23133	0.369538	1.78515
SPIRE1	Protein spire homolog 1	Q08AE8	STSSSSVSPSFPEEPVLEAVSTR	475	-0.902256	1.62361	-0.110231	0.161687	-0.470727	0.449608	-0.311543	0.447758	-0.301983	0.432641
ZNF496	Zinc finger protein 496	Q96IT1	HCEDPVVIDDGDSPLDQEQEQLPVEPHSDLAK	133	-1.17655	1.62329	-0.591533	1.94093	-0.577302	1.69452	-0.750326	2.15837	-0.926354	0.975784
ANAPC7	Anaphase-promoting complex subunit 7	Q9UJX3	INMMLANLYK	137	-1.32082	1.62327	-0.406943	0.593928	-1.54417	1.43496	-1.26499	0.989801	-1.10918	1.46475
PRUNE1	Exopolyphosphatase PRUNE1	Q86TP1	HCPPCHVSVELVGSCATLVTER	134	0.487415	1.62324	0.246818	0.418001	-0.385429	0.430731	-0.118777	0.222927	0.382403	1.43431
TUBGCP5	Gamma-tubulin complex component 5	Q96RT8	TIEGIYEK	64	-1.55844	1.62291	0.182936	0.268349	0.00727277	0.00691762	0.250621	0.45945	0.0430228	0.0363658
FBLIM1	Filamin-binding LIM protein 1	Q8WUP2	RQLAGQSFYQK	216	1.09332	1.62282	0.807905	0.937441	0.756616	0.939519	0.29329	0.282967	1.29087	2.6487
LIN37	Protein lin-37 homolog	Q96GY3	LPPPTPPGPPGDACR	163	1.04249	1.62272	0.623022	0.828	1.30297	1.65111	1.11569	1.13917	0.103372	0.0528451
CERT1	Ceramide transfer protein	Q9Y5P4	EKLAEMETFR	159	-0.607666	1.62271	-0.103638	0.199331	0.0419586	0.0875145	0.162744	0.402325	0.101237	0.18782
LRRC40	Leucine-rich repeat-containing protein 40	Q9H9A6	KSGQLNLSGR	37	-2.10544	1.62264	-0.0233314	0.0386303	-0.183782	0.40197	0.134633	0.303846	-0.141428	0.226416
PSMD12	26S proteasome non-ATPase regulatory subunit 12	O00232	WSTLVEDYGMELR	317	-0.316134	1.62263	0.026178	0.0781894	0.0712514	0.250483	0.136141	0.512897	0.211858	0.791849
TOP2B	DNA topoisomerase 2-beta	Q02880	SEDDSAKFDSNEEDSASVFSPSFGLK	1457	-0.489244	1.62263	0.175929	0.493492	0.05671	0.295599	-0.166067	0.554315	-0.0426127	0.130289
SLC39A11	Zinc transporter ZIP11	Q8N1S5	AAATGLPEGPAVPVPSR	164	0.743102	1.62222	0.506007	0.992003	-0.0317635	0.0344395	-0.312363	0.497797	-0.263959	0.401669
FOXK2	Forkhead box protein K2	Q01167	LAVIQEAR	413	-0.114369	1.62214	-0.126264	1.96025	-0.127556	1.75697	-0.0607584	0.562504	-0.097061	1.28631
ZCCHC8	Zinc finger CCHC domain-containing protein 8	Q6NZY4	SEAGHASSPDSEVTSLCQK	591	0.388827	1.62201	0.196456	0.485263	0.309149	1.08662	-0.239588	0.358704	-0.0730903	0.185914
POLRMT	DNA-directed RNA polymerase, mitochondrial	O00411	LHSEPILQDLSR	1174	-1.96884	1.62166	0.0740615	0.0336968	0.321065	0.188235	0.165445	0.0846565	1.20732	1.25264
TCEAL1	Transcription elongation factor A protein-like 1	Q15170	DLFEGRPPMEQPPCGVGK	77	-0.417819	1.62158	-0.144428	0.479941	0.00324334	0.0082467	-0.0685907	0.214224	-0.315464	0.7227
NCKAP1	Nck-associated protein 1	Q9Y2A7	MFQQCLELPSQSR	552	-1.05271	1.62156	0.0101117	0.0152872	-0.0992077	0.355749	-0.00447687	0.0116594	-0.274032	0.463028
PTPN23	Tyrosine-protein phosphatase non-receptor type 23	Q9H3S7	QPIPAQHHFSSGIPAGFPAPR	930	0.512251	1.62094	-0.963289	1.60007	-0.539461	1.23933	-1.14078	1.72677	-1.03703	1.76174
AIDA	Axin interactor, dorsalization-associated protein	Q96BJ3	EFPFDVQPVPLRR	107	0.885555	1.62092	0.514069	0.806631	0.577418	0.556158	0.94676	0.844088	0.546141	0.382935
SCAF4	SR-related and CTD-associated factor 4	O95104	IAWALNK	577	1.31822	1.6206	1.29113	0.997452	3.06636	5.02776	3.05935	1.88342	2.66102	1.55506
MCM9	DNA helicase MCM9	Q9NXL9	VLEVETTPGSLR	667	0.235658	1.62059	-0.0505673	0.234543	-0.0547954	0.221253	-0.0575698	0.267715	-0.0296651	0.103971
POLR2A	DNA-directed RNA polymerase II subunit RPB1	P24928	TLPHFIKDDYGPESR	806	-0.768891	1.62015	-0.326063	0.482349	-0.68444	1.16387	-0.177422	0.495532	-0.111065	0.33439
CNOT11	CCR4-NOT transcription complex subunit 11	Q9UKZ1	TEPLAANPFAASFAHLLNPAPPAR	137	-1.03325	1.62008	-0.666291	0.56546	0.186708	0.196417	-0.0399384	0.0294336	-1.18579	1.70713
RRBP1	Ribosome-binding protein 1	Q9P2E9	AKVGAAEEELQK	1158	0.185724	1.62004	0.155105	1.16722	0.148562	1.19419	0.170443	1.4983	0.128317	0.911682
XPO1	Exportin-1	O14980	PAIMTMLADHAAR	2	-0.249751	1.6196	0.111054	0.62107	0.0181896	0.0762006	0.147778	1.03326	0.0456134	0.0990991
TRAP1	Heat shock protein 75 kDa, mitochondrial	Q12931	ATDILPK	376	-0.275881	1.61886	-0.0502283	0.204017	0.0216621	0.0912763	0.085982	0.479384	0.0751725	0.231046
SH3GL1	Endophilin-A2	Q99961	GQVKNPGYPQSEGLLGECMIR	79	-0.443172	1.6188	-0.272551	1.10143	-0.212929	0.74498	-0.358669	1.42261	-0.530402	1.09118
MARCKS	Myristoylated alanine-rich C-kinase substrate	P29966	SFKLSGFSFK	163	-2.47196	1.61871	-3.40464	5.05011	-3.69565	5.35509	-1.56594	0.824306	-2.5414	1.80665
SF3A1	Splicing factor 3A subunit 1	Q15459	QFLTQLMQKEQR	180	-0.71099	1.6187	-3.07454	1.47309	-1.44082	0.740284	-0.303824	0.568013	-0.0950241	0.166842
SLC2A1	Solute carrier family 2, facilitated glucose transporter member 1	P11166	GTADVTHDLQEMKEESR	233	-1.11421	1.61854	-0.287943	0.296874	-0.482178	0.625555	-0.0015574	0.00167452	-0.104502	0.0825463
CNPY4	Protein canopy homolog 4	Q8N129	SREVLELGQVLDTGK	58	1.69596	1.61823	1.04584	1.58788	0.0561248	0.0415869	-0.12482	0.0835229	0.307843	0.285992
KDM3B	Lysine-specific demethylase 3B	Q7LBC6	SEDGQPMVLK	1475	2.92444	1.61815	0.0307168	0.00683224	1.21682	0.377019	-0.0631461	0.0133275	0.474805	0.122012
OTUD4	OTU domain-containing protein 4	Q01804	ESNYFGLSPEER	436	1.08809	1.61813	-0.746188	0.348994	-0.0160611	0.00966055	-1.13807	0.618685	0.700005	0.83146
EXOC6	Exocyst complex component 6	Q8TAG9	VQVTDTNR	92	1.2298	1.61804	0.20191	0.156312	-0.222331	0.202942	0.225495	0.186547	-0.364514	0.385537
PSMD6	26S proteasome non-ATPase regulatory subunit 6	Q15008	YSVFFQSLAVVEQEMK	268	1.88639	1.61766	0.85254	0.448455	1.57427	1.17406	-0.15749	0.0682536	-1.15548	0.525787
NBPF19	Neuroblastoma breakpoint family member 19;Neuroblastoma breakpoint family member 20;Neuroblastoma breakpoint family member 9;Putative neuroblastoma breakpoint family member 8;Neuroblastoma breakpoint family member 10;Neuroblastoma breakpoint family member 15	A0A087WUL8	ELLEVVEPEVLQDSLDR	172	-2.2909	1.61759	-2.00706	1.64675	-0.63008	0.422392	-1.37131	1.2968	-1.20831	1.23505
MCCC1	Methylcrotonoyl-CoA carboxylase subunit alpha, mitochondrial	Q96RQ3	SEQEFQEQLESAR	220	0.182261	1.61606	0.0612871	0.365503	0.0217693	0.093366	0.0475093	0.275185	0.500958	4.26474
PSMC4	26S proteasome regulatory subunit 6B	P43686	QIGIDPPR	193	0.289272	1.61593	-0.0784851	0.227677	-1.96704	0.761249	-1.1572	0.478232	0.211247	1.14288
PLEKHG4B	Pleckstrin homology domain-containing family G member 4B	Q96PX9	DSCQPDHTSVFSK	741	-0.730526	1.61589	-0.0931561	0.206775	-0.0757136	0.194828	0.0435972	0.104535	0.116784	0.392868
KDM2A	Lysine-specific demethylase 2A	Q9Y2K7	LPHSVTCSLCGEVDQNEETQDFEKK	614	-2.06092	1.61546	-0.364491	0.227613	0.0669758	0.0334234	-0.205644	0.120721	0.151663	0.0787946
SRP68	Signal recognition particle subunit SRP68	Q9UHB9	CFFIAQSYVLVK	466	0.388213	1.61542	0.100915	0.409827	0.028798	0.070385	0.232817	0.943	0.00162153	0.00435984
TRMT1	tRNA (guanine(26)-N(2))-dimethyltransferase	Q9NXH9	TDAPASALWDIMR	488	0.763196	1.61517	0.853212	1.99865	0.733813	1.66452	0.833234	1.64646	0.878266	1.94242
NNT	NAD(P) transhydrogenase, mitochondrial	Q13423	MLTEQGK	950	2.12186	1.61509	0.864688	0.469489	0.0911405	0.0300786	1.02392	0.523125	1.09766	0.559452
PARN	Poly(A)-specific ribonuclease PARN	O95453	NSPATLFEVPDTW	627	0.423115	1.61469	0.280266	0.880764	0.0053232	0.00894072	0.178579	0.400376	-0.249651	0.5696
TMCC1	Transmembrane and coiled-coil domains protein 1	O94876	IAQTARDDNVAEYLK	250	-1.6049	1.61415	-0.429226	0.5131	-0.986486	0.958331	-0.644979	0.788252	-0.398656	0.265249
PSMD5	26S proteasome non-ATPase regulatory subunit 5	Q16401	EKTTLCVSILER	59	-0.263425	1.61408	-0.10213	0.419248	-0.0881273	0.603767	-0.0241258	0.131681	0.309973	2.57428
PPP1R18	Phostensin	Q6NYC8	ETAELSETLTR	291	0.27038	1.61357	0.0286761	0.0917845	0.0973833	0.410999	-0.11359	0.286129	0.0044732	0.0101613
CNOT11	CCR4-NOT transcription complex subunit 11	Q9UKZ1	QSELPTQSK	229	1.05034	1.61311	2.09779	1.88112	1.20758	1.5686	2.18165	4.49205	1.61478	1.42878
EIF3H	Eukaryotic translation initiation factor 3 subunit H	O15372	TAQGSLSLK	157	-1.33839	1.6129	-0.220257	0.130785	-1.68246	1.95773	-0.676934	0.398582	-1.83864	1.50334
KIF16B	Kinesin-like protein KIF16B	Q96L93	EWTNKWNETQNILK	421	1.65281	1.61221	1.09464	0.679152	1.30081	0.653725	0.657509	0.410333	1.82459	1.853
DST	Dystonin	Q03001	RDLEALSK	5253	0.999435	1.61159	0.912308	1.20015	0.940584	1.38732	-0.129857	0.177589	0.639674	0.970633
KIF5B	Kinesin-1 heavy chain	P33176	ANLEAFTVDKDITLTNDKPATAIGVIGNFTDAER	385	1.95409	1.61104	1.03923	0.43484	0.507982	0.207665	1.05042	0.718118	0.501546	0.218438
MRPL30	Large ribosomal subunit protein uL30m	Q8TCC3	YGGDPQNPHKLHIVTR	56	0.751175	1.61096	0.578838	0.706879	-0.125218	0.120022	-0.128593	0.134118	0.347023	0.367126
SFPQ	Splicing factor, proline- and glutamine-rich	P23246	WKSLDEMEK	494	-0.339395	1.6109	-0.367883	1.01954	-0.610115	2.88749	-0.12267	0.269168	-0.12117	0.237663
SETDB1	Histone-lysine N-methyltransferase SETDB1	Q15047	HFIDEELEKMDCVQQR	42	-0.581626	1.61074	-0.382363	0.929559	-0.235476	0.498442	-0.317806	0.942343	-0.585611	1.88525
EPB41	Protein 4.1	P11171	SEIPTKDVPIVHTETK	748	-0.623536	1.61063	0.28557	0.718163	0.126221	0.232494	-0.127374	0.245038	-0.142349	0.289433
SHROOM3	Protein Shroom3	Q8TF72	LGQEQVK	1944	-1.37909	1.61033	-1.13728	1.17473	-0.846274	0.806823	-0.838973	0.770166	0.0734428	0.029124
FUBP3	Far upstream element-binding protein 3	Q96I24	AWEDYYKK	519	0.532503	1.61005	0.112829	0.153376	0.0316291	0.0408634	-1.21161	0.67402	0.500482	0.29229
SGO2	Shugoshin 2	Q562F6	FDKGQNSLTCNK	519	-0.728086	1.60995	-0.328168	0.670962	-0.212177	0.459643	-0.392361	0.927745	-0.222484	0.491052
TMEM237	Transmembrane protein 237	Q96Q45	NTPASASLEGLAQTAGR	43	0.660487	1.60952	0.0554517	0.0855585	-0.085057	0.0978757	0.0283646	0.0347344	0.203107	0.436206
MISP	Mitotic interactor and substrate of PLK1	Q8IVT2	YPILGIPQAHR	7	-0.562419	1.60926	-0.172228	0.245523	-0.565105	1.24357	-0.155357	0.301465	-0.112291	0.222885
KANSL3	KAT8 regulatory NSL complex subunit 3	Q9P2N6	VIPVATHLLNNGSGVGVLQCLEHMIGAVR	305	1.43743	1.60923	0.792345	0.681793	1.31557	1.35445	0.410819	0.31081	0.0276568	0.0140182
DDX54	ATP-dependent RNA helicase DDX54	Q8TDD1	FVGQSGQEDKK	739	-1.40708	1.60895	-0.00775285	0.00784267	-0.515293	0.507862	-0.17671	0.204639	-0.522127	0.687459
ALDH18A1	Delta-1-pyrroline-5-carboxylate synthase	P54886	TPLFDQIIDMLR	627	-1.0434	1.60887	-0.162742	0.141589	0.0310293	0.0235755	-0.0786135	0.0731907	-0.320838	0.372282
KMT2B	Histone-lysine N-methyltransferase 2B	Q9UMN6	AMVPEDVPR	884	-0.6009	1.60874	-0.0426166	0.090812	-0.0980108	0.241256	-0.143134	0.178493	0.279573	0.540229
OGA	Protein O-GlcNAcase	O60502	EIPVESIEEVSK	258	-0.673896	1.60867	0.092248	0.169171	0.304593	0.790512	0.376842	1.04789	0.532169	1.67999
SMARCC2	SWI/SNF complex subunit SMARCC2	Q8TAQ2	MDRNVEMFMTIEK	117	-0.925256	1.60866	-0.0633763	0.108701	0.0894564	0.173802	0.257509	0.677387	-0.13874	0.0985973
SELENOO	Protein adenylyltransferase SelO, mitochondrial	Q9BVL4	YAYSKQPEVCR	373	1.6538	1.60851	0.97247	0.58857	0.52481	0.247739	0.340413	0.149281	-0.126158	0.0555567
IRAK1	Interleukin-1 receptor-associated kinase 1	P51617	GPNQPVESDESLGGLSAALR	581	-0.563258	1.60791	-0.164504	0.202505	-0.349695	0.819389	0.0477999	0.0683015	0.037282	0.0759625
PSMD5	26S proteasome non-ATPase regulatory subunit 5	Q16401	GISSQPFPELHCAALK	401	-0.495012	1.60789	-0.304942	1.00219	-0.198074	0.798799	-0.132143	0.366077	0.184753	0.501738
SPG7	Paraplegin	Q9UQ90	HVFIDLPTLQER	474	1.02707	1.60771	-0.158115	0.12618	0.276844	0.329018	0.140964	0.141705	0.469256	0.670882
TRIM33	E3 ubiquitin-protein ligase TRIM33	Q9UPN9	SLLQQLENVTK	379	0.174731	1.60753	-0.0455524	0.233792	-0.0881093	0.663554	-0.0981721	0.691864	-0.0835473	0.575873
NOL8	Nucleolar protein 8	Q76FK4	DIKEETYR	1055	1.55145	1.6075	1.21397	1.04189	1.56297	1.27062	2.16064	2.50801	2.07552	1.87332
LSS	Lanosterol synthase	P48449	HPDIEAQER	664	1.06195	1.6074	0.517837	0.579359	0.432357	0.455396	0.653395	0.557371	0.918019	1.32349
TRIP11	Thyroid receptor-interacting protein 11	Q15643	LVSSSNAMENASHQASVQVESLQEQLNVVSK	1620	-1.35744	1.60721	0.419619	0.306657	0.83237	0.870299	-0.0150274	0.00923192	-0.128438	0.0728515
PTPN13	Tyrosine-protein phosphatase non-receptor type 13	Q12923	WSIVSSPER	1081	-2.45051	1.60681	-3.28399	2.56436	-1.32395	0.574969	-1.0835	0.535001	-2.29512	1.53576
LONP1	Lon protease homolog, mitochondrial	P36776	TENPLILIDEVDK	582	1.0992	1.60678	0.925711	1.1824	0.670642	0.677057	0.413989	0.2798	0.751945	0.771342
BAZ1A	Bromodomain adjacent to zinc finger domain protein 1A	Q9NRL2	LGLHVTPSNVDQVSTPPAAK	1533	1.61539	1.60671	0.909664	0.772385	1.63669	1.59955	0.991328	0.571878	2.29154	3.19263
ZDHHC5	Palmitoyltransferase ZDHHC5	Q9C0B5	GRGVGSPEPGPTAPYLGR	616	-1.62245	1.60641	-0.873606	1.05289	-0.398539	0.242961	-1.79215	2.36087	-1.02148	1.34796
CDK2	Cyclin-dependent kinase 2	P24941	TYTHEVVTLWYR	158	1.97553	1.60623	-0.0201821	0.00610361	1.73557	1.06551	-0.0679238	0.0236522	-0.261135	0.106102
FDXR	NADPH:adrenodoxin oxidoreductase, mitochondrial	P22570	RGPTGVIATTMTDSFLTGQMLLQDLK	401	1.22745	1.60604	-0.190758	0.0854003	1.90316	1.13865	2.34543	1.65972	1.19936	1.88016
MAD1L1	Mitotic spindle assembly checkpoint protein MAD1	Q9Y6D9	LDQTMGLSIR	320	-0.385846	1.60557	-0.0959372	0.211556	-0.0486425	0.127899	0.0964899	0.318144	-0.115361	0.403869
NUF2	Kinetochore protein Nuf2	Q9BZD4	LGIQQLK	403	-0.445968	1.60482	-0.201608	0.66984	0.154527	0.422604	-0.0103789	0.0212148	-0.0548803	0.129976
BRIP1	Fanconi anemia group J protein	Q9BX63	LKACPYYTAR	347	1.85042	1.60422	-0.0310955	0.0102971	1.91741	1.70296	1.80998	1.18945	0.365291	0.165335
ARHGEF17	Rho guanine nucleotide exchange factor 17	Q96PE2	EEGLREWGSGSPPCVPGPQEGLRPMSDSVGGAFR	338	1.15094	1.60413	0.0932277	0.0415069	0.133804	0.04377	0.255027	0.165215	0.80563	1.04338
MIA2	Melanoma inhibitory activity protein 2	Q96PC5	EYEGYEVESSLK	710	-0.975347	1.60409	-0.2849	0.287562	-0.345141	0.290789	0.280914	0.41684	-1.00927	1.80916
RABEP1	Rab GTPase-binding effector protein 1	Q15276	SVLQEDAEKLR	246	1.19736	1.60402	-0.115408	0.089405	-0.0419132	0.029439	0.669614	0.990362	0.57808	0.770531
YKT6	Synaptobrevin homolog YKT6	O15498	IILHNTMESLLER	151	-0.106022	1.60399	-0.0310956	0.384706	0.0200742	0.180716	0.0194404	0.213453	-0.0240311	0.242234
BCOR	BCL-6 corepressor	Q6W2J9	SEIISTAPSSWVVPGPSPNEENNGK	499	0.472383	1.60395	0.148834	0.357229	-0.510924	0.704568	-0.228826	0.392761	-0.82134	0.951079
ANXA7	Annexin A7	P20073	TILQCALNRPAFFAER	409	-0.251005	1.60357	-0.153092	0.528144	-0.0502897	0.157256	-0.129383	0.309269	0.0773426	0.227265
CTNNBIP1	Beta-catenin-interacting protein 1	Q9NSA3	KMGSNLTASEEEFLR	28	-0.258775	1.60345	-0.168652	0.906847	-0.0280616	0.0872665	-0.0245531	0.0806225	-0.0592576	0.213094
ATL1	Atlastin-1	Q8WXF7	ILIPWLLSPESLDIK	299	-1.27488	1.60277	-0.559573	0.606408	-0.593312	1.47956	0.0608706	0.0738283	-0.692984	0.700983
BAZ1A	Bromodomain adjacent to zinc finger domain protein 1A	Q9NRL2	LHEICDDIFAYVK	101	0.852185	1.60248	0.367093	0.435549	0.46545	0.601132	0.387885	0.612038	0.0865291	0.0852503
CTNNA1	Catenin alpha-1	P35221	QDLLAYLQR	774	0.262761	1.60222	0.0179918	0.0496821	0.0770179	0.28755	0.326425	2.18977	0.388251	2.48785
PSMB5	Proteasome subunit beta type-5	P28074	LLANMVYQYK	141	1.96611	1.60213	1.61069	1.27961	1.29151	0.919399	1.49014	1.12409	1.96244	1.69009
HIP1	Huntingtin-interacting protein 1	O00291	MWGHLSEGYGQLCSIYLK	127	-0.718199	1.60178	-0.402257	1.23569	-0.440242	1.39165	-0.510347	0.820007	-0.441928	0.628214
STXBP4	Syntaxin-binding protein 4	Q6ZWJ1	LKPGDQLVSVNK	64	-0.363921	1.60128	-0.354977	0.53076	0.232194	1.19704	-0.45962	0.65161	-0.00678265	0.0153238
ARHGAP27	Rho GTPase-activating protein 27	Q6ZUM4	ACSVAGSWVCPRPLAR	180	1.40956	1.60126	0.332897	0.16863	1.29466	1.46432	0.93634	0.655628	0.184913	0.0670162
PRPF40B	Pre-mRNA-processing factor 40 homolog B	Q6NWY9	AVPSNASWEQAMK	291	-1.27273	1.60081	-1.00592	1.34621	-0.783042	0.701526	0.248211	0.225148	-0.276379	0.158552
WBP4	WW domain-binding protein 4	O75554	CWIADNRPSVEFHER	18	0.661274	1.60074	0.025994	0.0447056	0.340871	0.391475	0.14304	0.144191	0.103928	0.141124
CYFIP1	Cytoplasmic FMR1-interacting protein 1	Q7L576	SFLDDPIWR	1102	1.4465	1.60051	1.23245	0.839366	1.25611	1.4852	1.70652	1.97168	1.56911	1.4773
ARHGEF19	Rho guanine nucleotide exchange factor 19	Q8IW93	TWTSDGWLEGVR	746	-2.13718	1.60018	-1.01775	0.761285	-0.502905	0.420256	-0.897065	0.591751	-1.3884	1.01988
SEPTIN9	Septin-9	Q9UHD8	SFEVEEVETPNSTPPRR	30	0.198211	1.59957	-0.0666796	0.20992	0.0654694	0.276585	-0.0745518	0.385712	0.0231673	0.120362
AGFG1	Arf-GAP domain and FG repeat-containing protein 1	P52594	QIWLGLFDDR	91	0.260077	1.59915	0.0491043	0.164447	0.12255	0.510957	0.171617	0.773722	-0.102478	0.143742
DOP1B	Protein dopey-2	Q9Y3R5	VLWNQLNKETR	879	-1.62656	1.59894	0.164097	0.120975	0.123795	0.0841055	0.690657	0.770249	-0.467533	0.301802
HSP90B1	Endoplasmin	P14625	EVEEDEYK	349	-0.522166	1.59866	0.0868767	0.179273	-0.0125258	0.0209913	0.0451545	0.0784951	0.293966	1.10627
WDHD1	WD repeat and HMG-box DNA-binding protein 1	O75717	IWEDLDDDDPK	39	0.611486	1.59824	0.406769	0.955994	0.458981	1.09103	0.678946	1.78192	0.386811	0.487565
UGDH	UDP-glucose 6-dehydrogenase	O60701	IIDSLFNTVTDKK	318	-0.209279	1.59801	0.0476644	0.232522	-0.091294	0.35345	0.137642	0.961067	0.425311	3.41633
UBR4	E3 ubiquitin-protein ligase UBR4	Q5T4S7	SPNPSLLHLCGSLAQLACVEPVR	1441	-0.73458	1.59764	0.0837247	0.202868	-0.217031	0.407739	-0.160938	0.398446	-0.245356	0.524272
ITGB4	Integrin beta-4	P16144	MDFAFPGSTNSLHR	1447	-0.445451	1.59757	-0.101168	0.260939	-0.2506	0.822448	0.0714691	0.284157	0.118888	0.534644
KAT7	Histone acetyltransferase KAT7	O95251	EPLLENLTSEYDLDLFRR	295	-0.477517	1.59743	-0.387741	1.25252	-0.333113	0.624135	-0.49152	1.23165	-0.399486	0.79651
RAPH1	Ras-associated and pleckstrin homology domains-containing protein 1	Q70E73	QQSFCAKPPPSPLSPVPSVVK	843	1.53789	1.59703	0.613104	0.563178	0.6429	0.43033	-0.347455	0.337045	0.564735	0.55201
PARP14	Protein mono-ADP-ribosyltransferase PARP14	Q460N5	SIAFPAIGTGNLGFPK	1126	-1.27701	1.59684	-0.516793	0.321036	0.735466	0.932836	-0.880304	0.551316	-1.30038	1.18123
PFKFB4	6-phosphofructo-2-kinase/fructose-2,6-bisphosphatase 4	Q16877	IGGDPGLSPR	268	-0.516088	1.59673	-0.468392	1.8975	-0.568261	1.40166	-0.307478	1.29381	-0.300276	0.707436
FAM76B	Protein FAM76B	Q5HYJ3	YGPPQTCEQCK	97	0.296433	1.59644	-0.0933337	0.26753	-0.0562561	0.112553	0.0727924	0.234688	-0.0151203	0.0473145
UBA1	Ubiquitin-like modifier-activating enzyme 1	P22314	VGPDTERIYDDDFFQNLDGVANALDNVDAR	552	1.06694	1.59603	-0.0369532	0.0274092	-0.102348	0.0954375	0.432961	0.492918	0.092556	0.0628119
IARS1	Isoleucine--tRNA ligase, cytoplasmic	P41252	GDNRLDLLK	1105	-1.27308	1.59597	0.0954877	0.328014	0.072401	0.234221	0.0145159	0.0461668	0.0497065	0.122954
CHD6	Chromodomain-helicase-DNA-binding protein 6	Q8TD26	SSTSGITGDIGDELQEAR	2055	-0.832271	1.59587	-0.491074	0.305886	-0.808945	0.475517	-0.0521934	0.0267121	-0.964546	1.06252
RB1	Retinoblastoma-associated protein	P06400	FDIEGSDEADGSK	877	-0.336891	1.59539	-0.142195	0.602242	-0.153313	1.0183	-0.029019	0.118447	-0.165744	0.801772
NUP58	Nucleoporin p58/p45	Q9BVL2	EQYLGYR	415	-1.68894	1.59518	-0.906983	0.627748	0.0834553	0.0821261	-0.186995	0.180345	-0.558158	0.674966
POP1	Ribonucleases P/MRP protein subunit POP1	Q99575	NIWLETHIWHAKR	199	1.19671	1.59504	0.653367	1.24083	0.0241402	0.0244981	0.0306955	0.039497	0.706443	1.19215
PRDX3	Thioredoxin-dependent peroxide reductase, mitochondrial	P30048	GTAVVNGEFKDLSLDDFK	74	1.36494	1.59432	1.10135	1.14991	0.50507	0.380385	0.159119	0.087908	-0.0317751	0.0190243
DNA2	DNA replication ATP-dependent helicase/nuclease DNA2	P51530	ILYACGFSVLLTSYTHSAVDNILLK	664	1.42941	1.59405	1.34169	1.34535	0.696352	0.576654	-0.236312	0.056414	1.52224	1.57655
BOD1L1	Biorientation of chromosomes in cell division protein 1-like 1	Q8NFC6	GLEGNANSPAHLR	2494	-0.350208	1.59389	-0.0670328	0.26493	0.0339244	0.114214	0.0436452	0.154412	-0.1153	0.332474
SRCIN1	SRC kinase signaling inhibitor 1	Q9C0H9	QIASLTGLVQSALLR	576	0.29777	1.59388	0.0397699	0.108748	-0.0338162	0.100579	0.183425	0.875827	0.127876	0.508641
RRS1	Ribosome biogenesis regulatory protein homolog	Q15050	EWLIEVPGNADPLEDQFAK	155	0.640198	1.59384	-0.112303	0.160965	0.169937	0.197396	-0.145972	0.167513	0.00267381	0.00159021
DNAJC1	DnaJ homolog subfamily C member 1	Q96KC8	SAEEPWTQNQQK	492	0.329153	1.59382	0.188995	0.626393	0.211384	0.84643	-0.0530389	0.0853555	-0.0680263	0.150324
MVK	Mevalonate kinase	Q03426	FPEIVAPLLTSIDAISLECER	257	1.50286	1.59373	-0.143832	0.053571	0.281127	0.157919	0.0132575	0.00609227	1.33096	1.3691
CAST	Calpastatin	P20810	QAEPELDLR	302	-0.818524	1.59355	-1.10648	1.78783	-0.859779	1.27922	-0.703977	1.57638	-0.352809	0.510012
CAD	Multifunctional protein CAD	P27708	SVHICHVAR	1609	-0.925188	1.59354	-0.798152	0.950063	-0.481353	0.654486	-0.26556	0.203235	-0.329092	0.391637
SPTBN2	Spectrin beta chain, non-erythrocytic 2	O15020	EQQHLLASADTGRDLTGALR	659	-0.659646	1.59335	0.0176258	0.0252126	0.185781	0.214819	-0.356963	0.727105	0.280485	0.484662
NGDN	Neuroguidin	Q8NEJ9	EQYSDAPEEIR	211	-1.24959	1.59329	-0.683176	0.515824	0.0799388	0.0576432	0.893216	1.0156	0.327212	0.349841
PSMC2	26S proteasome regulatory subunit 7	P35998	LCPNSTGAEIR	376	-0.175922	1.59323	-0.00836164	0.0352097	0.097046	0.603654	0.110989	0.619999	0.339946	2.39304
AVEN	Cell death regulator Aven	Q9NQS1	FAEEKEWDSEASCPK	157	1.15319	1.59297	-0.466646	0.331265	-0.309307	0.207857	-0.166528	0.149101	-0.924141	1.06811
SRRM1	Serine/arginine repetitive matrix protein 1	Q8IYB3	VKEPSVQEATSTSDILKVPKPEPIPEPK	230	-0.691366	1.59271	-0.412976	0.925198	-0.0492546	0.215951	-1.04332	1.51398	-1.05322	0.860559
CLPB	Mitochondrial disaggregase	Q9H078	NEMGHTPLDYAR	296	-0.4204	1.59261	-0.104621	0.744697	-0.223481	1.55733	-0.201801	1.63028	-0.147094	0.555198
CCDC22	Coiled-coil domain-containing protein 22	O60826	QSWGLLGAPIQAR	258	0.255297	1.5926	-0.0508073	0.172658	-0.0922843	0.351011	0.104919	0.748827	-0.186947	0.430039
ZMYM2	Zinc finger MYM-type protein 2	Q9UBW7	LTEIRHEVSFK	431	1.1837	1.59225	0.925005	1.15854	1.12209	1.62303	0.85546	0.917888	1.21435	1.72546
CHD7	Chromodomain-helicase-DNA-binding protein 7	Q9P2D1	ALVNHSGLSAPVPR	1678	1.44479	1.5921	0.713146	0.353622	1.47684	1.27284	0.5333	0.324111	-1.56909	1.03079
ECH1	Delta(3,5)-Delta(2,4)-dienoyl-CoA isomerase, mitochondrial	Q13011	SVQATTENKELK	310	-0.315592	1.59163	-0.265914	0.667748	-0.143969	0.514098	-0.144782	0.856485	0.0640253	0.221326
KIAA1671	Uncharacterized protein KIAA1671	Q9BY89	IRGWTAESSEAKPEVR	483	-0.600283	1.59147	-0.963001	1.13206	-0.514227	0.8	-0.588639	0.559774	-0.698572	1.14287
TRIP6	Thyroid receptor-interacting protein 6	Q15654	SGPTWLPPKQPEPAR	2	0.996925	1.59053	1.4924	3.23087	1.7605	5.16652	1.55761	3.27319	0.308627	0.664915
BRF1	Transcription factor IIIB 90 kDa subunit	Q92994	RLTEFEDTPTSQLTIDEFMK	263	2.72764	1.58957	2.37673	1.25566	1.96029	0.978525	2.22863	0.963649	3.19827	2.02433
GTF2I	General transcription factor II-I	P78347	KMVDQLFCK	468	-1.39553	1.58923	0.156166	0.2005	0.20229	0.269279	0.434742	0.752681	0.298404	0.315726
NFYC	Nuclear transcription factor Y subunit gamma	Q13952	AWIHTEDNKR	84	-2.65377	1.58922	-1.6708	0.75414	0.809304	0.399095	-0.231	0.0682042	0.237308	0.0715275
NAA40	N-alpha-acetyltransferase 40	Q86UY6	NGLNVSIECKR	51	0.572038	1.58856	0.338953	0.842912	0.228727	0.256619	0.217186	0.293669	0.555532	1.6154
ACLY	ATP-citrate synthase	P53396	EAYPEEAYIADLDAK	245	1.81535	1.58769	0.757835	0.372069	1.6885	1.47767	1.71408	1.49518	1.39656	0.895624
PSMD8	26S proteasome non-ATPase regulatory subunit 8	P48556	DILEIGAQWSILRK	146	-1.05775	1.58765	-0.2476	0.32181	0.0568439	0.0225284	-0.94055	0.883133	-0.469249	0.189446
PARD3	Partitioning defective 3 homolog	Q8TEW0	ERDYAEIQDFHR	1077	1.61733	1.58755	-0.0864452	0.039006	-0.163096	0.0925909	-0.360894	0.173052	-0.528963	0.423939
TRIM27	Zinc finger protein RFP	P14373	FNLFPCVLGSPCFIAGR	354	0.602088	1.58747	0.520943	0.908146	-0.130852	0.0956023	0.542222	1.43573	0.251097	0.36775
TRAP1	Heat shock protein 75 kDa, mitochondrial	Q12931	VTLRLDTHPAMVTVLEMGAAR	599	-1.04923	1.58745	1.04749	1.36338	0.746317	0.733598	1.185	1.74109	0.973139	1.30083
TMPO	Lamina-associated polypeptide 2, isoforms beta/gamma	P42167	MEESFSSK	382	1.09213	1.58737	0.145723	0.0758944	0.346526	0.244174	2.09147	1.96047	0.893064	0.445839
GTF3C3	General transcription factor 3C polypeptide 3	Q9Y5Q9	AIFAVLTSVLTK	611	0.382221	1.5872	-0.181178	0.537337	-0.0373028	0.0824415	0.0189014	0.0276565	-0.116802	0.237647
PHF6	PHD finger protein 6	Q8IWS0	CMLFSSGTVQLTTTSR	242	2.19435	1.58716	2.53804	1.68888	1.64266	0.788562	2.78738	2.42118	2.15939	1.42444
ANKS1A	Ankyrin repeat and SAM domain-containing protein 1A	Q92625	ASMQLEETGVHAPGASQPSALDQSK	540	-0.384492	1.58664	-0.0636123	0.172348	-0.101776	0.314836	-0.982133	1.05314	-0.0287274	0.0807049
STX4	Syntaxin-4	Q12846	QQVTILATPLPEESMK	65	3.8133	1.58628	2.22701	0.930763	2.14533	0.86449	0.512054	0.184936	0.660671	0.226572
APIP	Methylthioribulose-1-phosphate dehydratase	Q96GX9	QFYHLGWVTGTGGGISLK	34	0.370529	1.58566	0.0445954	0.120388	0.0460107	0.110521	0.200162	0.846925	0.0599436	0.105357
FIGNL1	Fidgetin-like protein 1	Q6PIW4	EQLWVDQQKK	300	0.823845	1.58564	0.581124	1.08787	-0.152651	0.0876058	0.644488	0.772861	-0.132689	0.0938599
BCOR	BCL-6 corepressor	Q6W2J9	DVTDKPLDLSSK	435	0.629291	1.58537	0.413572	1.01569	0.336807	0.640509	0.537135	1.21184	0.720448	1.56084
SRP72	Signal recognition particle subunit SRP72	O76094	ILQKAEDLCR	198	0.220663	1.58526	0.0102041	0.0499323	0.0671272	0.31232	-0.0346717	0.138779	-0.070058	0.252455
PHF23	PHD finger protein 23	Q9BUL5	TIQTFVKK	86	-1.50052	1.58522	-0.207376	0.144471	-0.789052	0.762515	0.0373654	0.0284409	-0.208238	0.184708
CWC15	Spliceosome-associated protein CWC15 homolog	Q9P013	IRMENILSGNPLLNLTGPSQPQANFK	158	0.279204	1.58466	0.179922	0.591503	-0.0852829	0.209159	-0.105133	0.41377	-0.14792	0.480544
POM121C	Nuclear envelope pore membrane protein POM 121C	A8CG34	ASLQWFNQALEDK	519	0.47766	1.58458	0.535246	2.98491	0.321361	1.48127	0.215959	0.73976	-0.150359	0.248192
CIAPIN1	Anamorsin	Q6FI81	MADFGISAGQFVAVVWDKSSPVEALK	1	3.01979	1.58442	1.42428	0.77015	2.78754	2.15282	0.120714	0.0600749	-0.62312	0.655403
RPL4	Large ribosomal subunit protein uL4	P36578	ACARPLISVYSEK	2	0.878834	1.58438	0.273205	0.224701	0.195626	0.196065	0.250261	0.227925	0.647767	0.85946
PATZ1	POZ-, AT hook-, and zinc finger-containing protein 1	Q9HBE1	HSTEMLHNLNQQR	22	-1.58555	1.58409	-0.434991	0.832771	-0.151875	0.281056	0.213353	0.703446	0.0616404	0.139976
AHNAK	Neuroblast differentiation-associated protein AHNAK	Q09666	QGFDLNVPGGEIDASLK	5040	-0.894318	1.5839	-0.945808	1.87902	-0.676983	0.969314	-0.887586	1.43427	-1.81718	2.68922
ZNF217	Zinc finger protein 217	O75362	CIPQLDPFTTFQAWQLATK	286	0.497282	1.5837	-0.0656566	0.133081	-0.0414172	0.0757952	-0.142471	0.375535	-0.408559	0.843182
DSP	Desmoplakin	P15924	FGDSNTVMR	917	-0.549447	1.58359	0.0849165	0.337614	-0.245535	1.32657	0.0275954	0.0522961	0.118546	0.173822
ZW10	Centromere/kinetochore protein zw10 homolog	O43264	QNILYHLGEEWQK	171	0.23905	1.58351	0.0449881	0.132539	0.123938	0.55027	0.0757355	0.313182	-0.0444104	0.143656
HBS1L	HBS1-like protein	Q9Y450	IEAGYIQTGDR	509	-1.12673	1.5833	0.611516	0.380243	1.08384	0.883642	0.988131	0.75264	1.78571	3.4161
SLTM	SAFB-like transcription modulator	Q9NWH9	RTVIIHDRPDITHPR	854	0.905072	1.58282	-0.525106	0.566324	-0.273358	0.192715	0.116974	0.105513	-0.0605383	0.0395394
CTNND1	Catenin delta-1	O60716	TPAILEASAGAIQNLCAGR	677	0.198936	1.5828	-0.0160038	0.0596365	-0.0891358	0.630986	-0.107101	0.530477	-0.357412	1.13582
TRAPPC8	Trafficking protein particle complex subunit 8	Q9Y2L5	QFIQEFTFR	350	1.66341	1.58268	0.678382	0.354667	1.39926	1.46101	1.54764	1.2773	3.07249	3.67121
LPP	Lipoma-preferred partner	Q93052	GGMDYAYIPPPGLQPEPGYGYAPNQGR	269	0.516141	1.58247	0.45685	1.37372	0.566244	0.998379	0.34414	1.4903	-0.21108	0.373264
IQSEC1	IQ motif and SEC7 domain-containing protein 1	Q6DN90	DSLREQTLSK	493	-0.458149	1.58222	-0.366368	0.914374	-0.362416	0.957807	-0.565218	1.70083	-0.259289	0.478859
CSDE1	Cold shock domain-containing protein E1	O75534	DNFGFIETANHDK	528	-1.80605	1.5822	-0.547272	0.273046	-1.55629	0.952068	-1.10685	0.552205	0.449577	0.234738
BTAF1	TATA-binding protein-associated factor 172	O14981	AVAAASLVPVVESLVYLQTQK	448	-1.12849	1.58218	-1.17154	1.78795	-0.328329	0.338236	-0.490467	0.535589	-0.401338	0.36766
MRTO4	mRNA turnover protein 4 homolog	Q9UKD2	GVVTLLSDYEVCK	165	-0.46363	1.58208	-0.207316	0.577949	-0.0898822	0.36076	-0.377691	0.462269	-0.24726	0.520379
RPN2	Dolichyl-diphosphooligosaccharide--protein glycosyltransferase subunit 2	P04844	TSFTPVGDVFELNFMNVK	323	-1.17988	1.58192	-0.944646	1.60673	-0.343159	0.484432	-0.305365	0.466981	-0.647164	0.813518
HSP90AA1	Heat shock protein HSP 90-alpha	P07900	RAPFDLFENRK	346	-0.877248	1.5817	-0.452437	1.93338	-0.350803	0.794846	-0.773258	2.16891	-0.146996	0.221221
CKAP5	Cytoskeleton-associated protein 5	Q14008	EFKPLPGR	513	0.346826	1.58146	0.201539	0.824633	0.125644	0.424082	-0.15553	0.344915	0.0148334	0.0302925
TCF3	Transcription factor E2-alpha	P15923	AGATAAASEIKR	488	-0.923072	1.58127	0.31431	0.961038	0.251744	0.78094	0.386426	1.43216	0.19888	0.494554
PITPNM3	Membrane-associated phosphatidylinositol transfer protein 3	Q9BZ71	DISVYSVLGLPASQIFIVGRPTKK	844	-1.89287	1.58106	-0.448004	0.396898	-0.194908	0.17906	-0.00868012	0.00511902	-0.886427	0.670534
G3BP2	Ras GTPase-activating protein-binding protein 2	Q9UN86	VLSLNFSECHTKIR	65	0.559653	1.58066	0.114738	0.161975	0.00847179	0.00902432	0.0913845	0.100736	-0.0219281	0.0252948
CHD3	Chromodomain-helicase-DNA-binding protein 3	Q12873	GNYHYLVK	645	0.425353	1.58066	0.122363	0.284187	0.152994	0.279791	0.150033	0.329884	0.0236756	0.0478598
ATPAF1	ATP synthase mitochondrial F1 complex assembly factor 1	Q5TC12	ALGLGLVSPAQLR	33	-0.870506	1.58031	-0.303601	0.585792	-0.233209	0.40662	-0.332658	0.656069	-0.785142	1.62954
SMARCD2	SWI/SNF-related matrix-associated actin-dependent regulator of chromatin subfamily D member 2	Q92925	IHETIESINQLKTQR	440	-0.55061	1.58027	-0.161851	0.340638	-0.128021	0.330305	-0.0596065	0.116433	-0.105905	0.219344
GSE1	Genetic suppressor element 1	Q14687	TVNGVWR	131	0.254947	1.58015	0.0358685	0.145988	0.0793643	0.371828	0.169443	0.905188	-0.156084	0.434627
GOLGB1	Golgin subfamily B member 1	Q14789	KLQEALTSR	1179	0.375299	1.57991	0.186723	0.507805	0.234507	0.839089	0.000994603	0.00149018	-0.437375	0.549616
ARID5B	AT-rich interactive domain-containing protein 5B	Q14865	SAAAEAPTDDQPTDLSLPK	894	0.654948	1.57962	0.305849	0.707711	-0.152476	0.255574	0.0867141	0.126774	-0.165573	0.291021
SMARCA4	Transcription activator BRG1	P51532	TKATIELK	398	-0.992752	1.57931	0.123274	0.401883	0.0435917	0.134126	0.135064	0.430328	0.00264597	0.00519242
NOM1	Nucleolar MIF4G domain-containing protein 1	Q5C9Z4	NAGSGSETQLR	584	0.903031	1.57919	0.214889	0.338123	-0.00419728	0.0033743	0.27935	0.357818	0.18245	0.253572
EIF4A2	Eukaryotic initiation factor 4A-II	Q14240	LNTSIQVVLLSATMPTDVLEVTKK	204	-1.40435	1.57918	-1.14093	1.16267	-0.4718	0.22859	0.173469	0.088282	-0.653558	0.314769
IPO7	Importin-7	O95373	IYKDQMEYMLQNHVFPLFSSELGYMR	448	1.22839	1.57908	1.59451	1.6388	1.77864	2.34315	1.01343	1.12838	0.838888	0.967929
KIAA0586	Protein TALPID3	Q9BVV6	LVLPTTLLTAQENDVNLPVAAEDFSQYQLK	1401	0.633327	1.57895	0.02227	0.0181364	-0.414612	0.631086	-0.0841526	0.0964173	0.0405622	0.0445534
INPPL1	Phosphatidylinositol 3,4,5-trisphosphate 5-phosphatase 2	O15357	IRESIQEDLAEEAPCLQGGR	1173	-0.211065	1.57859	-0.185416	0.757033	0.0054744	0.0201929	-0.0812568	0.416755	0.0986554	0.557377
TAB3	TGF-beta-activated kinase 1 and MAP3K7-binding protein 3	Q8N5C8	VIPNPTTVFK	447	-0.11725	1.57858	-0.0978986	1.10741	-0.0475559	0.438621	-0.0855947	0.840829	-0.103605	0.686252
PAN3	PAN2-PAN3 deadenylation complex subunit PAN3	Q58A45	AFAEPSLVFAYDFHAGGETMMSR	559	-3.11108	1.57846	-1.1018	0.295524	-2.66714	1.27694	-0.438039	0.1092	-1.08179	0.282646
NRDE2	Nuclear exosome regulator NRDE2	Q9H7Z3	DGSILSHPALPGTEEAMFALFLQQCHFLR	453	-1.07806	1.57829	-2.87691	0.986056	-0.912182	0.811943	-0.854366	0.816375	-1.4399	1.67286
DDX39A	ATP-dependent RNA helicase DDX39A	O00148	FMQDPMEVFVDDETKLTLHGLQQYYVK	241	-1.72783	1.57795	-1.57634	1.19986	-1.52237	1.37105	-0.740435	0.399935	-2.39587	1.22714
PICK1	PRKCA-binding protein	Q9NRD5	HVQDIVFQLQR	326	-0.252919	1.57793	-0.0158305	0.0516661	0.0489118	0.203044	0.232161	1.65967	0.333086	2.42857
COBL	Protein cordon-bleu	O75128	VASSASEELQSFR	1169	-0.563081	1.5778	-0.382571	0.716288	-0.584755	0.518794	-0.431779	0.690579	-0.179603	0.284455
TJP2	Tight junction protein ZO-2	Q9UDY2	ETPQSLAFTR	618	-0.486042	1.57687	-0.279874	1.18943	-0.359488	1.87237	-0.0777008	0.260303	-0.330173	1.10006
NSL1	Kinetochore-associated protein NSL1 homolog	Q96IY1	WYPLRPK	269	-0.728908	1.57659	-1.00056	0.55367	-0.279912	1.23503	-0.170571	0.612046	-0.387594	1.83151
CCT3	T-complex protein 1 subunit gamma	P49368	NVLLDPQLVPGGGASEMAVAHALTEK	400	-0.190257	1.57656	-0.135737	0.638782	-0.181913	1.77759	-0.17028	1.7141	-0.15291	0.614958
ARFGEF3	Brefeldin A-inhibited guanine nucleotide-exchange protein 3	Q5TH69	SALHLFR	1178	-0.807673	1.57655	0.0227253	0.0849064	0.106226	0.486784	-1.2634	0.576685	-0.378496	1.13513
TOMM70	Mitochondrial import receptor subunit TOM70	O94826	AGKYEQAIQCYTEAISLCPTEK	127	0.375454	1.57648	0.421085	2.01549	0.10666	0.356007	0.0920556	0.272389	0.282761	1.14268
MAPKAPK2	MAP kinase-activated protein kinase 2	P49137	DVKPENLLYTSK	186	-0.97137	1.57634	-0.13114	0.387216	-0.763753	1.24285	-0.532033	1.2611	-0.0075394	0.0160058
SEH1L	Nucleoporin SEH1	Q96EE3	TAAVWEEIVGESNDKLR	82	-2.57634	1.57607	-2.18884	0.929548	0.0250073	0.00620484	0.187428	0.0523311	-2.04517	0.801515
UBE2V1	Ubiquitin-conjugating enzyme E2 variant 1	Q13404	VVLQELR	119	-0.331316	1.57592	-0.272205	0.966924	-0.0771963	0.246342	0.075486	0.139127	0.0947221	0.252174
ACTN4	Alpha-actinin-4	O43707	FAIQDISVEETSAK	153	-0.570525	1.57577	0.115698	0.247959	0.111609	0.317907	-0.0117015	0.0162812	0.169796	0.316383
TRIP11	Thyroid receptor-interacting protein 11	Q15643	QIALQDQLLK	114	0.233799	1.57566	0.0168437	0.0649344	0.0748379	0.302932	0.164638	1.02139	0.149322	0.882943
ARHGAP21	Rho GTPase-activating protein 21	Q5T5U3	TVIVPSEK	273	-1.8186	1.57551	0.186426	0.209998	-0.626869	0.458563	-0.185292	0.131086	0.390532	0.696765
PLEC	Plectin	Q15149	MGIVGPEFKDK	4130	-2.08213	1.57537	-0.447782	0.38046	-0.386504	0.310094	0.557883	0.997404	0.291943	0.168879
PXDN	Peroxidasin homolog	Q92626	FHISPEGFLTINDVGPADAGRYECVAR	571	-1.66534	1.575	-0.740563	0.432539	-0.730229	0.622904	-1.74488	1.37518	-0.388726	0.260653
RBM25	RNA-binding protein 25	P49756	ASNGNARPETVTNDDEEALDEETKR	178	-0.829421	1.57475	0.223495	0.333791	0.187397	0.232798	0.164588	0.220849	0.0774042	0.104344
ALDH7A1	Alpha-aminoadipic semialdehyde dehydrogenase	P49419	ELGLREENEGVYNGSWGGR	44	-1.22394	1.57468	-1.21755	1.70192	-0.485885	0.551498	-0.0413874	0.0301457	-0.366198	0.293743
KIF26A	Kinesin-like protein KIF26A	Q9ULI4	LIPAPLPDTTALGR	1710	-0.7417	1.57446	0.611982	1.47208	0.0782082	0.100332	0.0101549	0.013278	0.307197	0.432874
NCOR1	Nuclear receptor corepressor 1	O75376	QEQIDLECR	980	0.225057	1.57432	-0.283263	0.621851	-0.0898864	0.242208	-0.0115581	0.0381625	0.103316	0.497652
CIT	Citron Rho-interacting kinase	O14578	IQELQEKLEK	638	0.573394	1.57422	0.396827	1.00025	0.487591	1.34783	0.514549	1.30361	0.180915	0.269349
TAF6	Transcription initiation factor TFIID subunit 6	P49848	AHWLSIEGCQPAIPENPPPAPK	133	0.672921	1.57394	0.783062	1.87904	0.612993	1.21149	0.415044	0.721274	0.478537	0.949246
RCC1	Regulator of chromosome condensation	P18754	RSPPADAIPK	10	-0.252778	1.57347	0.121663	0.445539	0.116476	0.400696	0.0558438	0.166186	0.153104	0.72193
MNAT1	CDK-activating kinase assembly factor MAT1	P51948	GAGNCPECGTPLRK	42	-0.455225	1.57344	-0.235604	0.595677	-0.241682	0.70271	-0.526323	1.85283	-0.635313	1.47102
SART3	Squamous cell carcinoma antigen recognized by T-cells 3	Q15020	GYCYVEFK	747	0.232916	1.57342	-0.121492	0.507754	-0.0151269	0.0705366	0.0399052	0.107627	0.124583	0.799774
ATRX	Transcriptional regulator ATRX	P46100	GADCQEVPQDKDGYK	602	-0.48519	1.57331	-0.228268	0.545519	-0.326369	0.808434	-0.289545	0.424535	-1.22049	1.30185
AP3B1	AP-3 complex subunit beta-1	O00203	TVIGSVLLR	1077	-2.18169	1.57304	-0.991975	0.558447	0.907409	0.548946	0.696048	0.454133	1.05717	0.843828
GOT2	Aspartate aminotransferase, mitochondrial	P00505	NLDKEYLPIGGLAEFCK	91	0.540946	1.57302	-0.151855	0.467201	0.0262239	0.0423028	-0.244127	0.585932	-0.160842	0.406951
TLN1	Talin-1	Q9Y490	TLREQGVEEHETLLLRR	179	-0.822911	1.57288	-0.236219	0.23727	0.145605	0.326525	-0.0836404	0.15301	-0.574562	0.699767
DHX40	Probable ATP-dependent RNA helicase DHX40	Q8IX18	MSRFPAVAGR	1	-1.24977	1.57283	-0.210872	0.249683	-0.201155	0.236219	0.113145	0.161044	-0.482191	0.682676
SF3A3	Splicing factor 3A subunit 3	Q12874	KEELNAISGPNEFAEFYNR	69	-4.68642	1.57281	-0.68421	0.412132	0.016534	0.0235034	-0.0276128	0.0386239	-0.789887	0.525609
NT5DC2	5'-nucleotidase domain-containing protein 2	Q9H857	YILRGDETFAVLSR	243	-4.62763	1.57272	-1.47423	0.461278	0.0773517	0.222157	-0.81598	0.463646	-0.969639	0.659945
KDM3A	Lysine-specific demethylase 3A	Q9Y4C1	CLPPLPPLSK	852	0.660236	1.57256	0.0353671	0.0282849	-0.0375042	0.0398452	-0.0687353	0.0474724	0.0636507	0.0467221
ZNF512B	Zinc finger protein 512B	Q96KM6	ERTPEEPVAK	850	-1.2423	1.57249	-0.00284689	0.00178191	-0.0374409	0.0264025	0.159442	0.122538	-0.23866	0.166187
AJUBA	LIM domain-containing protein ajuba	Q96IF1	LEPTAPALSPR	111	-2.91496	1.5724	-1.00953	0.985992	0.137603	0.113841	-0.58661	0.334375	-1.27634	0.732219
VPS13D	Intermembrane lipid transfer protein VPS13D	Q5THJ4	ENYPDYMPSNIFSDSAK	3152	-1.94574	1.57238	-0.0431102	0.017243	-0.0461034	0.0267829	0.485581	0.368748	0.0115289	0.00625801
PPFIA3	Liprin-alpha-3	O75145	SYFMESLVDAR	972	-1.48027	1.57233	-0.690233	0.60243	-0.155854	0.0681182	0.424415	0.248878	1.05896	1.10676
FAM91A1	Protein FAM91A1	Q658Y4	RYYEELLK	62	-2.54557	1.57192	-1.88093	1.14295	-2.02749	1.27406	-1.98615	1.22767	-0.938107	0.312574
HDAC5	Histone deacetylase 5	Q9UQL6	TSLHSIPVTVEVKPVLPR	23	-0.718211	1.57057	-0.568489	0.753488	-0.544889	1.53405	-1.06642	2.51339	-1.32633	1.65077
SYNE1	Nesprin-1	Q8NF91	QQTLSMLQDGAAPTPGEEPPLMQEITAMQDR	5273	-1.25629	1.57011	-0.332351	0.221111	0.488622	0.666015	0.243501	0.181507	0.512369	0.593045
KIF16B	Kinesin-like protein KIF16B	Q96L93	SPDYVSQEMVFK	69	-0.410702	1.57005	-0.134372	0.280982	0.184486	0.461153	0.241255	0.808916	0.309014	0.923324
NUP107	Nuclear pore complex protein Nup107	P57740	VLLQASQDENFGNTTPR	32	0.134405	1.57004	0.0118867	0.0913201	-0.0312327	0.220775	-0.0813324	0.745635	-0.0797137	0.641598
BRD2	Bromodomain-containing protein 2	P25440	AVHEQLAALSQGPISKPKR	529	-1.45801	1.56972	0.620544	0.635061	0.721257	0.693729	0.759087	0.977585	0.177887	0.107514
HSF1	Heat shock factor protein 1	Q00613	HNNMASFVR	63	-0.749824	1.56964	0.0402405	0.0648473	0.16273	0.399217	-0.417992	0.884802	0.327953	0.894784
HIP1R	Huntingtin-interacting protein 1-related protein	O75146	EIGDLWGHLHDR	114	-1.31141	1.56962	0.293804	0.474318	0.344508	0.492916	0.105896	0.0938735	0.0166476	0.0152172
MAP3K4	Mitogen-activated protein kinase kinase kinase 4	Q9Y6R4	IVGYSTHHEHLQR	334	1.00859	1.56931	0.507589	0.623911	-0.00536208	0.00485473	-0.152576	0.156888	0.61981	0.825849
NUMA1	Nuclear mitotic apparatus protein 1	Q14980	LQNALNEQR	1034	1.95299	1.56928	1.81666	1.43347	1.1544	0.632252	1.15029	0.556469	1.83413	1.45656
TRAPPC9	Trafficking protein particle complex subunit 9	Q96Q05	SSEALILHAGECQR	924	0.962056	1.56912	0.480233	0.526717	0.102489	0.0860199	-0.154891	0.152919	0.73689	0.95773
RPA1	Replication protein A 70 kDa DNA-binding subunit	P27694	ATAFNEQVDKFFPLIEVNK	235	-0.888517	1.56905	-0.648385	0.80353	-0.319465	0.495219	-0.533613	0.513696	-0.524357	0.546857
DGCR8	Microprocessor complex subunit DGCR8	Q8WYQ5	EFVINPNGK	502	-0.874652	1.5689	-0.422331	0.773691	-0.152901	0.193458	-0.581814	0.389156	-0.388107	0.36849
RNMT	mRNA cap guanine-N7 methyltransferase	O43148	RLEASETESFGNEIYTVK	327	0.721149	1.56805	0.259466	0.39677	0.356214	0.577595	0.318244	0.544478	0.22183	0.327648
NCDN	Neurochondrin	Q9UBB6	VQLVSVMK	362	-2.03583	1.56769	0.186681	0.0688394	1.10075	0.698284	0.264163	0.109317	-0.0809291	0.0260406
OGDH	2-oxoglutarate dehydrogenase complex component E1	Q02218	LVEDHLAVQSLIR	123	1.00048	1.56766	-0.0329078	0.0251019	0.909836	0.980319	0.0432393	0.023401	-0.0680766	0.0438279
RPL8	Large ribosomal subunit protein uL2	P62917	DIIHDPGR	47	-3.35567	1.56726	-2.03407	0.881758	-0.026235	0.0569925	-0.552871	1.98994	-1.52165	0.714058
PGR	Progesterone receptor	P06401	ILAGMVKPLLFHKK	920	0.678305	1.56712	-0.458842	0.668517	-1.13166	1.65903	-0.631161	0.657487	-1.38475	1.43531
MECP2	Methyl-CpG-binding protein 2	P51608	TQPAVATAATAAEKYK	436	-1.57187	1.56711	0.599394	0.476313	0.76948	0.591284	1.12999	0.917449	0.693985	0.537444
GTF2IRD1	General transcription factor II-I repeat domain-containing protein 1	Q9UHL9	ALVELNGVSLIPK	213	0.369209	1.56658	0.169281	0.534818	0.0978891	0.246899	-0.0452255	0.0802753	-0.0499982	0.0953704
ATP5F1C	ATP synthase subunit gamma, mitochondrial	P36542	EVMLVGIGDK	127	-0.692865	1.56607	-0.0427157	0.0743712	-0.0357615	0.0580402	0.00982488	0.0173945	-0.272325	0.64028
MYO9B	Unconventional myosin-IXb	Q13459	LLEALGKAEPFFIR	838	0.976008	1.56606	0.737105	1.13877	0.475437	0.647231	-0.194238	0.251694	0.563783	0.782738
KPNA3	Importin subunit alpha-4	O00505	GRDVETMR	19	-0.960577	1.56605	-0.628324	0.872828	-1.23944	1.04338	-1.0467	2.26547	-0.301494	0.31023
PBK	Lymphokine-activated killer T-cell-originated protein kinase	Q96KB5	GLSHSPWAVKK	55	-1.57236	1.56599	-0.609731	0.491893	-0.221184	0.206344	0.135328	0.141503	-0.518673	0.601379
ANKRD50	Ankyrin repeat domain-containing protein 50	Q9ULJ7	AQDSDTLCVGGFIR	115	0.250212	1.56567	-0.0729633	0.217675	-0.274501	0.42749	-0.0317789	0.0734881	-0.226302	0.48321
MPDZ	Multiple PDZ domain protein	O75970	ATGVIVK	276	0.978593	1.56555	-0.0184536	0.0162718	-0.11469	0.107275	-0.00585381	0.00470637	0.19502	0.163294
ORC3	Origin recognition complex subunit 3	Q9UBD5	INFLSNNQCENIRR	355	-1.18197	1.56421	-0.303607	0.226649	0.235883	0.260428	0.439109	0.363625	1.20793	2.10509
UBR5	E3 ubiquitin-protein ligase UBR5	O95071	DLSLEVDRDRDLLIQQTMR	2239	-0.292382	1.56419	0.000354028	0.00134864	0.0451456	0.171608	-0.00120693	0.00447897	0.0398552	0.162749
RPL18A	Large ribosomal subunit protein eL20	Q02543	SRFWYFVSQLK	42	0.808962	1.56406	-0.136893	0.140829	0.460209	0.851171	0.409922	0.809533	-0.357346	0.303324
HSP90AB1	Heat shock protein HSP 90-beta	P08238	YESLTDPSKLDSGKELK	56	-0.200202	1.56323	-0.123772	0.75761	0.0330821	0.136829	-0.0358698	0.120224	0.335609	1.94307
STAT3	Signal transducer and activator of transcription 3	P40763	TLTDEELADWK	234	-0.936886	1.56291	-0.0353946	0.0408007	-0.133577	0.117918	0.149373	0.244051	-0.253268	0.259761
HSPA5	Endoplasmic reticulum chaperone BiP	P11021	IINEPTAAAIAYGLDKR	198	0.433182	1.56194	0.405166	1.58626	0.175208	0.357107	0.115644	0.226628	0.362122	1.00788
MGA	MAX gene-associated protein	Q8IWI9	VTLGPTQVFLANK	2711	0.812582	1.56139	-0.52787	0.478235	-1.47674	2.16659	-1.02531	1.33377	-0.637809	0.481702
POLR1F	DNA-directed RNA polymerase I subunit RPA43	Q3B726	SEVSEEVTENGTEEAAK	208	-0.508301	1.56111	-0.244786	0.384868	0.0274021	0.0480875	-0.154236	0.286011	0.0832396	0.167298
DUSP12	Dual specificity protein phosphatase 12	Q9UNI6	VSCAGQMLEVQPGLYFGGAAAVAEPDHLR	21	1.26133	1.56089	1.39629	1.37485	2.11868	2.10871	0.785899	0.636135	1.08024	1.06517
HADHB	Trifunctional enzyme subunit beta, mitochondrial	P55084	TPFLLSGTSYKDLMPHDLAR	62	-0.175949	1.56072	0.0221479	0.139747	-0.0835946	0.665598	-0.0346362	0.310124	-0.593146	5.78897
SON	Protein SON	P18583	FREIQQELSSGR	17	-1.20508	1.56047	-1.74724	0.539547	-0.456377	0.34418	-0.466583	0.379565	-1.25627	1.02324
SNRNP70	U1 small nuclear ribonucleoprotein 70 kDa	P08621	TVKGWRPR	183	1.32076	1.56041	1.18435	1.76034	0.505555	0.543512	1.44811	0.383485	0.719597	0.799522
MSH3	DNA mismatch repair protein Msh3	P20585	GTSTHDGIAIAYATLEYFIR	980	-1.17329	1.56007	-1.15332	1.30235	-1.04004	1.27938	-0.687015	1.1639	-1.33794	1.82408
PRDX6	Peroxiredoxin-6	P30041	LAPEFAK	57	-0.52242	1.56006	0.0848941	0.24819	-0.247947	0.671393	-0.0357181	0.075062	-0.0803913	0.0802068
EXOC2	Exocyst complex component 2	Q96KP1	ITQVSMASLKELDQR	744	0.95487	1.56	-0.127486	0.101807	0.13634	0.0954257	0.275405	0.303841	0.596588	0.708503
RPP30	Ribonuclease P protein subunit p30	P78346	GPYDVANLGLLFGLSESDAK	199	-1.46872	1.55973	0.436683	0.331902	-0.864564	0.525043	-0.103192	0.0636764	-0.175261	0.116557
GOLGA4	Golgin subfamily A member 4	Q13439	VRDLQTQLEELQK	2074	-0.663223	1.55936	0.20993	0.392319	0.349044	0.936639	0.357111	1.03032	0.279316	0.468746
RNASEH2A	Ribonuclease H2 subunit A	O75792	LQDLDTDYGSGYPNDPK	199	0.679209	1.55906	0.00536404	0.00417181	0.319844	0.500058	0.42756	0.699508	0.369652	0.571284
MRPL9	Large ribosomal subunit protein bL9m	Q9BYD2	NLGVVVAPHTLKLPEEPITR	196	-0.707284	1.55883	-0.196364	0.222433	-0.314221	0.333724	-0.342667	0.262199	-0.515335	0.618843
VARS1	Valine--tRNA ligase	P26640	SLRADYNLTR	1120	0.219891	1.55842	0.104862	0.525731	-0.0307301	0.075431	0.141735	0.701161	0.279202	1.92542
PRR14L	Protein PRR14L	Q5THK1	ESTFGISSK	1211	0.350942	1.55828	0.0107963	0.0166256	0.275866	1.28961	0.147127	0.502042	0.0740955	0.158644
ACAD9	Complex I assembly factor ACAD9, mitochondrial	Q9H845	LRDSLGR	471	-1.17502	1.55828	-0.646553	0.767654	-1.72018	2.68041	-0.374571	0.510073	-0.322342	0.366487
MAP4	Microtubule-associated protein 4	P27816	SVPADLSRPK	853	-0.12952	1.55799	-0.0338832	0.308072	-0.0879656	1.34373	-0.00790859	0.0853544	-0.0839219	0.860363
NSUN2	RNA cytosine C(5)-methyltransferase NSUN2	Q08J23	DGQWFTDWDAVPHSR	370	0.244578	1.55778	0.174244	0.942564	0.0935941	0.373285	0.168889	0.842344	0.0472865	0.0693425
TRIM34	E3 ubiquitin-protein ligase TRIM34	Q9BYJ4	FAEAEDELVQQK	216	-2.01234	1.55775	-0.563384	0.814487	-0.963756	0.843938	-0.437588	0.932731	-1.05978	1.51704
TFG	Protein TFG	Q92734	RIPIHNEDITYDELVLMMQR	23	-1.43235	1.55772	-0.957275	0.734529	-0.713486	0.574102	-0.200626	0.172024	-0.474602	0.662891
CUL9	Cullin-9	Q8IWT3	VILLENLNR	1261	-0.900608	1.55754	-0.409614	0.852711	-0.115852	0.26618	0.0275656	0.0544023	-0.0563407	0.123716
HDAC6	Histone deacetylase 6	Q9UBN7	KVLEAGMGK	873	-0.490811	1.55748	-0.126867	0.312516	-0.470386	1.51159	-0.101966	0.432132	-0.220249	0.442289
ZKSCAN1	Zinc finger protein with KRAB and SCAN domains 1	P17029	SFSLSSNFTTPEEVPTGTK	357	2.00392	1.55744	0.876295	0.373749	0.156351	0.0659837	0.679234	0.348974	1.61296	1.12585
ADO	2-aminoethanethiol dioxygenase	Q96SZ5	MPRDNMASLIQR	1	-1.11915	1.55697	0.214272	0.21741	-0.810135	0.485784	-0.0656385	0.042452	0.169584	0.147752
CHTF18	Chromosome transmission fidelity protein 18 homolog	Q8WVB6	FPELPARKPLTYQTK	827	0.8412	1.55674	0.137911	0.15128	-0.0613155	0.0683357	-0.0192726	0.0197098	-0.238974	0.219352
ATP6V1C1	V-type proton ATPase subunit C 1	P21283	KDDFVLDSEYLVTLLVVVPK	172	0.881383	1.55673	0.10474	0.094309	0.409989	0.48891	-0.0618015	0.0544623	0.338438	0.380505
ZMYM4	Zinc finger MYM-type protein 4	Q5VZL5	TLSQGESQTSEHELFLDTK	1062	-0.69181	1.55649	-0.0327351	0.0458374	-0.524103	0.803574	-0.0193399	0.0325331	0.330433	0.679672
FEN1	Flap endonuclease 1	P39748	VYAAATEDMDCLTFGSPVLMR	172	-0.272133	1.55631	0.0250994	0.101832	0.058287	0.306531	-0.0226907	0.100377	-0.0409533	0.107754
ANKLE2	Ankyrin repeat and LEM domain-containing protein 2	Q86XL3	LDQDVLAALECADVDPHQFPAVHR	834	-1.99745	1.55617	-0.305075	0.291797	-1.93653	1.20199	-1.43191	1.50317	-1.54456	1.4802
FLOT2	Flotillin-2	Q14254	KQIAVEAQEILR	266	-0.831666	1.5554	-0.697609	0.944237	-0.497021	0.664382	-0.768138	0.892945	-0.775456	1.42272
HECTD4	Probable E3 ubiquitin-protein ligase HECTD4	Q9Y4D8	ANFGSRPFAYAEGQAHR	2127	-0.695991	1.55527	-0.15322	0.117408	-0.358522	0.31884	0.370276	0.725366	0.205268	0.317076
MYO1C	Unconventional myosin-Ic	O00159	SLGRGEFR	536	-2.23051	1.55522	-0.223103	0.0612711	-1.16811	0.482609	-0.972664	0.302321	-0.0973324	0.023858
NEK7	Serine/threonine-protein kinase Nek7	Q8TDX7	KVQIFDLMDAK	64	-0.347798	1.5552	-0.0179574	0.0507924	0.0794225	0.267903	0.114276	0.449916	0.0578415	0.195436
DDX24	ATP-dependent RNA helicase DDX24	Q9GZR7	HLLSQPLFTESQK	794	-0.355052	1.55514	-0.077741	0.187413	0.0103499	0.0232747	0.117796	0.808936	0.141432	1.2155
THUMPD3	tRNA (guanine(6)-N2)-methyltransferase THUMP3	Q9BV44	VCTPTTGR	433	0.193639	1.55513	0.0827589	0.43162	0.0580562	0.297688	0.020136	0.0591434	0.166029	0.927278
EEA1	Early endosome antigen 1	Q15075	NHTLQEQVTQLTEK	570	0.18914	1.55496	-0.0126122	0.06409	0.123053	1.32324	0.0786421	0.494625	-0.0431605	0.198418
HUWE1	E3 ubiquitin-protein ligase HUWE1	Q7Z6Z7	AIQDPAFSDGIR	518	-0.430603	1.5548	-0.131686	0.372314	-0.0759311	0.190599	-0.246247	0.602189	0.13643	0.2061
PAK4	Serine/threonine-protein kinase PAK 4	O96013	QENGMPEEPATTAR	113	0.340974	1.5548	-0.087307	0.205529	0.0445019	0.104422	0.149944	0.44798	0.143598	0.504744
UBA1	Ubiquitin-like modifier-activating enzyme 1	P22314	GNVQVVIPFLTESYSSSQDPPEK	605	0.277147	1.55472	0.318876	1.99188	0.273977	1.76853	0.121276	0.619494	0.166558	0.820621
PCID2	PCI domain-containing protein 2	Q5JVF3	QAEEYLSFAFEHCHR	228	0.853382	1.55461	0.187735	0.166851	0.505435	0.66704	0.450306	0.45848	1.08719	2.35275
NCAPG2	Condensin-2 complex subunit G2	Q86XI2	TGADVCRLWR	179	0.914869	1.55459	0.449182	0.560147	0.615831	0.787287	0.403975	0.624028	0.662125	1.21243
TNK2	Activated CDC42 kinase 1	Q07912	YAVQVAEGMGYLESK	232	-0.718994	1.55453	-0.252273	0.572926	0.0826595	0.279874	-0.30143	0.510098	0.0445583	0.109329
MARVELD3	MARVEL domain-containing protein 3	Q96A59	RRPESEPPSER	152	-2.15936	1.55434	-0.603419	0.857267	-0.492009	0.720147	-0.385027	0.356452	-0.920916	1.37855
KIF16B	Kinesin-like protein KIF16B	Q96L93	KLIEEMEEK	614	1.84474	1.55423	0.356827	0.138449	1.16095	0.897815	0.235911	0.0788259	0.14418	0.0494191
CDR2L	Cerebellar degeneration-related protein 2-like	Q86X02	DLELTNHR	93	0.263791	1.55405	0.0338454	0.0978684	0.0163023	0.0571128	0.0678623	0.271608	0.010179	0.0287812
PSMC5	26S proteasome regulatory subunit 8	P62195	VIMATNRIDILDSALLRPGR	291	-0.31221	1.55358	0.149558	0.541723	0.135105	0.548005	0.28635	1.31282	0.279584	1.30333
STRN3	Striatin-3	Q13033	LYDMIADLGDDELPHIPSGIINQSR	373	0.924845	1.55328	0.827841	1.24558	0.996341	1.6793	0.343604	0.344589	-0.0195706	0.0123666
SLAIN2	SLAIN motif-containing protein 2	Q9P270	SGLPRPSAPSAGGIPVPR	534	1.03795	1.55327	-0.598534	0.401073	-2.65394	1.07563	-2.04299	1.07808	-1.92284	1.63849
WIPI2	WD repeat domain phosphoinositide-interacting protein 2	Q9Y4P8	LAYTDDLGAVGGACLEDEASALR	417	0.690238	1.55278	-0.630497	0.800167	-0.418967	0.381817	-0.433743	0.647933	-0.835512	0.83072
MPHOSPH8	M-phase phosphoprotein 8	Q99549	LVIECGADCNILSK	685	1.26558	1.55248	1.07482	1.24115	1.11109	1.24604	0.977512	1.06995	1.28855	1.57326
NUP62	Nuclear pore glycoprotein p62	P37198	EQSGTIYLQHADEEREK	416	-0.419548	1.55241	0.225355	0.574788	0.392096	1.4201	0.369092	1.42096	0.225514	0.757831
HIRA	Protein HIRA	P54198	ATPGAPALTSMTPTAVER	575	1.68579	1.5524	-0.357521	0.175652	0.113671	0.0501515	0.590416	0.286017	-0.0282922	0.0106858
DCTN1	Dynactin subunit 1	Q14203	AIEMELR	568	-0.332848	1.55234	-0.163932	1.02668	-0.28338	0.787607	-0.0268286	0.0966065	-0.185361	0.730148
MGRN1	E3 ubiquitin-protein ligase MGRN1	O60291	DTLILPCR	287	-0.830048	1.55156	0.125934	0.133942	-1.1658	0.871162	-0.269317	0.373311	-0.384648	0.747723
MSTO1	Protein misato homolog 1	Q9BUK6	AAELLQDEYSGR	245	0.372299	1.55092	0.127796	0.320289	0.0560861	0.131193	0.127077	0.28064	0.162916	0.447814
TJAP1	Tight junction-associated protein 1	Q5JTD0	VIEFSEDK	331	-1.01844	1.5508	-0.876341	1.23805	0.0674665	0.0727298	-1.75904	1.59268	-0.812185	0.791257
HSPA4L	Heat shock 70 kDa protein 4L	O95757	SVVGIDLGFLNCYIAVAR	2	-0.891518	1.55073	0.213676	0.194262	-0.749331	1.0847	-0.0910695	0.118912	-0.267443	0.274482
NOTCH3	Neurogenic locus notch homolog protein 3	Q9UM47	TDRTGETALHLAAR	1835	-1.30738	1.5507	-1.12014	1.09921	-0.756452	0.649857	-0.311399	0.189492	0.227753	0.142629
GSE1	Genetic suppressor element 1	Q14687	VDTSVHYNIPELQSSSR	1057	0.421307	1.55064	0.206736	0.610371	0.054824	0.0815671	0.284134	0.611539	0.259806	0.960266
ABR	Active breakpoint cluster region-related protein	Q12979	MSLHNLATVFGPTLLRPSEVESK	791	-0.795772	1.55058	-0.00072606	0.00116442	-0.678965	1.28043	-0.569251	0.334567	0.233212	0.552618
HADHA	Trifunctional enzyme subunit alpha, mitochondrial	P40939	MGLVDQLVEPLGPGLKPPEER	215	-0.283671	1.5505	0.0483697	0.231431	-0.0415707	0.176143	-0.175915	0.932581	-0.801275	5.4955
GOLGB1	Golgin subfamily B member 1	Q14789	NADNNSSAFTALSEERDQLLSQVK	731	0.673395	1.55047	0.387517	0.748381	-0.170235	0.172865	-0.632505	0.545611	-2.34418	0.863237
AHNAK	Neuroblast differentiation-associated protein AHNAK	Q09666	VDIDTPDINIEGSEGKFK	3712	1.73679	1.54973	1.36932	1.01403	0.431201	0.252244	0.870228	0.708201	0.33288	0.189025
PRPF3	U4/U6 small nuclear ribonucleoprotein Prp3	O43395	LGLMPPPEPK	466	-0.164224	1.54951	-0.0281086	0.0837261	-0.0431911	0.0915347	-0.225044	0.913904	-0.335717	1.72566
NFRKB	Nuclear factor related to kappa-B-binding protein	Q6P4R8	SDLLEMAR	155	-0.712074	1.54918	0.198835	0.527291	-0.0441527	0.0680278	0.156752	0.33701	0.268418	0.671624
RBM42	RNA-binding protein 42	Q9BTD8	YVGSRPIK	446	0.234086	1.54905	0.0700561	0.262634	0.13311	0.810537	0.126363	0.75238	0.240633	1.47633
ACSL3	Fatty acid CoA ligase Acsl3	O95573	NWEEGGYFNTDKPHPR	510	-0.862415	1.54861	-0.16131	0.0924499	0.66982	0.725551	0.0256651	0.0162538	0.593763	0.507538
PADI2	Protein-arginine deiminase type-2	Q9Y2J8	FLGEVHCGTNVR	641	-0.567149	1.54856	-0.302738	0.75291	-0.556297	1.62542	0.144974	0.401548	0.199037	0.585733
WDR81	WD repeat-containing protein 81	Q562E7	FILLYQAR	883	-2.57157	1.54853	-0.0168566	0.0201242	-0.985857	0.739241	-1.69026	1.15189	-1.78169	1.68856
STARD10	START domain-containing protein 10	Q9Y365	SSQFLAPK	203	-0.273373	1.54769	-0.0864944	0.388227	0.107748	0.467279	0.161805	0.628244	0.524591	3.25252
LPIN1	Phosphatidate phosphatase LPIN1	Q14693	NPEMLWLWGELPQAAK	268	1.95933	1.5474	1.63052	1.17834	0.842146	0.412459	1.37301	0.86034	0.906035	0.354444
CAPN1	Calpain-1 catalytic subunit	P07384	FRLPPGEYVVVPSTFEPNKEGDFVLR	487	-0.173906	1.54694	-0.163072	1.10335	-0.101833	0.331911	-0.122572	1.16275	-0.119665	1.00089
AUTS2	Autism susceptibility gene 2 protein	Q8WXX7	FLASQSADR	502	-0.456208	1.54564	-0.161375	1.09417	-0.256849	1.43617	-0.247936	1.20783	-0.235486	0.569262
RFC2	Replication factor C subunit 2	P35250	ERVPYTDDGLEAIIFTAQGDMR	209	-0.293535	1.54547	-0.126229	0.659654	-0.0912235	0.297184	-0.199152	0.809796	-0.0397931	0.108082
CHMP1A	Charged multivesicular body protein 1a	Q9HD42	VQTAVTMKGVTK	76	0.589983	1.54532	0.0101645	0.0116955	0.195427	0.329436	-0.307128	0.595987	-0.257833	0.539307
TLN1	Talin-1	Q9Y490	DLDQASLAAVSQQLAPR	1674	0.240535	1.54513	-0.01304	0.0454764	0.0388197	0.17409	-0.0651459	0.310394	0.133748	0.751794
DROSHA	Ribonuclease 3	Q9NRR4	TAIVQNQHLAMLAK	1001	-1.36421	1.54511	-0.815883	0.494654	-0.460855	0.249898	-0.574462	0.316788	-1.07171	0.892922
NAT10	RNA cytidine acetyltransferase	Q9H0A0	YAPGDAVEK	471	-2.87754	1.54505	-4.1544	6.25828	-2.96065	1.96258	-1.53051	1.02101	-2.70751	1.5816
EEA1	Early endosome antigen 1	Q15075	QCGNIFCAECSAK	1376	0.290987	1.54483	0.101961	0.301385	0.0454193	0.117856	0.155508	0.509165	0.107202	0.234166
IFT22	Intraflagellar transport protein 22 homolog	Q9H7X7	LVHSNLEDDPEEIR	145	2.39206	1.54441	-1.00013	0.360026	1.4706	0.322156	-1.80483	1.27974	0.774184	0.138588
DCP1A	mRNA-decapping enzyme 1A	Q9NPI6	LMADVVEEETR	121	0.501373	1.54393	0.0906924	0.138412	-0.617904	0.805239	-1.35294	1.19009	-0.820518	0.791843
DNM1L	Dynamin-1-like protein	O00429	LPVTNEMVHNLVAIELAYINTK	476	-1.34716	1.5439	-0.949476	1.31118	-1.24097	1.86649	-1.04792	0.928713	-2.19528	0.63665
CLSPN	Claspin	Q9HAW4	AGQTVNVNVIVK	547	0.526959	1.54375	0.318797	0.678737	0.0948249	0.116991	0.346303	0.893839	0.320293	0.836504
TRMT11	tRNA (guanine(10)-N2)-methyltransferase homolog	Q7Z4G4	ALSCTLNR	2	2.79996	1.54354	2.37859	0.993526	1.6795	0.555621	1.95553	0.709978	2.26248	0.948328
ALDH16A1	Aldehyde dehydrogenase family 16 member A1	Q8IZ83	GAVEAAHQAFPGWAGQSPGAR	568	0.140932	1.54328	0.11503	1.37603	0.0704676	0.622761	-0.0616165	0.409587	0.0433022	0.191311
PTPN23	Tyrosine-protein phosphatase non-receptor type 23	Q9H3S7	CAALSVRPDTVR	425	0.195465	1.54321	-0.0390922	0.163652	-0.0143957	0.0555457	0.0226363	0.0978957	0.0509507	0.272725
CRACD	Capping protein-inhibiting regulator of actin dynamics	Q6ZU35	DLPSFLVPSLPYPPQK	794	1.08977	1.54306	0.306766	0.25847	-0.00432359	0.00280516	0.672082	1.02023	-0.333618	0.46266
DDX24	ATP-dependent RNA helicase DDX24	Q9GZR7	CLVVDEADR	467	0.208421	1.54299	-0.0282824	0.1251	0.01561	0.0698834	0.0830859	0.571148	0.0952923	0.737436
DCAF11	DDB1- and CUL4-associated factor 11	Q8TEB1	QAATQQNWDYR	398	0.269553	1.54298	0.0360879	0.128671	0.0133311	0.0303993	0.0247706	0.0747981	-0.0377536	0.0629354
SLC7A5	Large neutral amino acids transporter small subunit 1	Q01650	LVACLCVLLLTAVNCYSVK	173	2.6986	1.54273	2.6751	1.66639	2.69877	1.67522	1.27492	0.496612	2.33548	1.31403
ERC1	ELKS/Rab6-interacting/CAST family member 1	Q8IUD2	AAILQTEVDALR	517	0.111602	1.54271	-0.0247145	0.169517	-0.0971466	0.430056	-0.0435204	0.382183	-0.148846	0.836476
ITCH	E3 ubiquitin-protein ligase Itchy homolog	Q96J02	WKQPLTVIVTPVSKLHFR	65	0.997886	1.54271	-0.578622	0.487617	-0.0365118	0.0285092	-0.171145	0.129391	-0.279738	0.237661
EIF4G3	Eukaryotic translation initiation factor 4 gamma 3	O43432	YLDSDTEKELQALYALQASIVK	1499	0.650813	1.54249	0.0823294	0.0778577	0.0467981	0.046859	0.244394	0.394035	0.507632	0.616058
IPP	Actin-binding protein IPP	Q9Y573	YIEGVSDFNLR	239	2.1606	1.54241	1.01368	0.391127	1.64126	1.05356	1.7771	1.18659	2.09571	1.47564
WDR62	WD repeat-containing protein 62	O43379	DIVVASNKVSCR	189	0.965648	1.54206	0.279828	0.344576	0.989198	1.73682	0.259842	0.37894	0.152495	0.105447
CHD1L	Chromodomain-helicase-DNA-binding protein 1-like	Q86WJ1	DLSLGGVLLFPVDDKESR	774	-0.411098	1.54195	-0.227968	0.809955	-0.0967975	0.446021	-0.34548	1.59487	-0.311626	1.10669
ESPN	Espin	B1AK53	AADIQSYMDMLNPELGLPR	404	-0.85299	1.54187	-0.00524876	0.00524545	-0.196126	0.184404	-0.443538	0.586059	-0.0542783	0.061164
SAE1	SUMO-activating enzyme subunit 1	Q9UBE0	LWGLEAQKR	25	0.356015	1.54186	-0.0652481	0.183514	-0.269273	0.762197	-0.0699934	0.200429	-0.639986	1.68688
EDRF1	Erythroid differentiation-related factor 1	Q3B7T1	QPLCQYR	1016	3.52341	1.54179	-0.134387	0.0674385	-0.76695	0.586148	0.707748	0.435763	1.31263	0.43385
CLK3	Dual specificity protein kinase CLK3	P49761	GFTLFQTHENR	518	1.1074	1.54134	0.931866	1.1495	0.56859	0.487285	0.733187	0.910565	0.963261	1.20864
FIRRM	FIGNL1-interacting regulator of recombination and mitosis	Q9NSG2	QTAIIEVVSQLWAFLNIK	598	1.93409	1.54108	0.87417	0.494144	0.554845	0.28142	1.45476	0.847013	0.603951	0.301388
CETN2	Centrin-2	P41208	LFDDDETGKISFK	112	-0.919676	1.54104	-0.146239	0.189769	-0.302537	0.614456	-1.29425	1.08838	0.0100004	0.00672565
AHNAK	Neuroblast differentiation-associated protein AHNAK	Q09666	LKFGTFGGLGSK	5820	-0.448833	1.54099	-0.123384	0.249828	-0.320063	0.721055	-0.106715	0.211627	-0.00104676	0.00205009
IDH3B	Isocitrate dehydrogenase [NAD] subunit beta, mitochondrial	O43837	VEGSFPVTMLPGDGVGPELMHAVK	45	-0.410896	1.54098	-0.212049	0.621363	-0.124895	0.543631	-0.0597186	0.183132	-0.0171072	0.0415125
PBRM1	Protein polybromo-1	Q86U86	NNQGQLIAEPFYHLPSKK	398	-0.777063	1.54094	-0.0887803	0.103458	-0.0480322	0.0445982	0.14253	0.242936	0.417112	0.751659
DYNC1LI2	Cytoplasmic dynein 1 light intermediate chain 2	O43237	KIAILHENFTTVKPEDAYEDFIVKPPVR	319	-3.36542	1.54081	-0.0294817	0.0127723	0.91778	0.57449	0.764858	0.553577	-0.435114	0.187686
VPS13D	Intermembrane lipid transfer protein VPS13D	Q5THJ4	ALQITDFCHRK	3788	-0.891748	1.54055	-0.765261	0.567665	-0.504571	0.403911	-0.637465	0.62708	0.599472	0.473767
RNF20	E3 ubiquitin-protein ligase BRE1A	Q5VTR2	YDLEQGLGDLLTER	111	0.24742	1.5401	-0.123144	0.300737	-0.0958609	0.48129	0.316018	0.239601	-0.294484	0.560841
ACAT1	Acetyl-CoA acetyltransferase, mitochondrial	P24752	MLEIDPQKVNINGGAVSLGHPIGMSGAR	366	2.26985	1.54001	0.114393	0.0373064	-0.625066	0.245256	-0.739106	0.342423	-0.608467	0.237225
U2SURP	U2 snRNP-associated SURP motif-containing protein	O15042	NCGFVAFMNR	319	-0.708166	1.53983	-0.108607	0.131431	0.261093	0.949416	0.26706	0.979223	0.0821614	0.136732
PIP4K2C	Phosphatidylinositol 5-phosphate 4-kinase type-2 gamma	Q8TBX8	SAEGAPQKEVYFMGLIDILTQYDAK	358	-1.91564	1.53977	-1.25028	0.795761	-1.22858	0.790808	-0.18708	0.109874	-0.0808605	0.0426036
ARHGEF17	Rho guanine nucleotide exchange factor 17	Q96PE2	DGGFEPEK	448	-0.485309	1.53961	-0.267558	0.772679	-0.711128	1.25604	-0.0903639	0.232748	-0.394316	1.12509
NAGLU	Alpha-N-acetylglucosaminidase	P54802	RYGVSHPDAGAAWR	482	1.12008	1.5386	0.378084	0.244866	0.302423	0.206718	-0.825338	0.901361	-0.00677559	0.00345803
UBR4	E3 ubiquitin-protein ligase UBR4	Q5T4S7	YILQLAQEYCGDCK	3795	0.923296	1.53846	-0.197884	0.197653	0.439584	0.478773	-0.350281	0.562887	-0.527203	0.48273
SMTN	Smoothelin	P53814	KLLEVTADLAER	16	-1.55684	1.53832	-0.267546	0.594612	-0.493427	1.07117	-0.431041	0.289944	-0.19009	0.292613
UBL7	Ubiquitin-like protein 7	Q96S82	SMPSSSYR	211	1.03206	1.53832	0.798119	1.17601	0.93413	0.75708	0.85072	1.24643	1.61802	3.19354
FIP1L1	Pre-mRNA 3'-end-processing factor FIP1	Q6UN15	AFPYGNVAFPHLPGSAPSWPSLVDTSK	423	0.356994	1.53831	0.00365271	0.0103074	-0.025953	0.0877142	-0.108576	0.374802	-0.514055	2.34509
UBAC1	Ubiquitin-associated domain-containing protein 1	Q9BSL1	MADVSAEEK	103	-0.790717	1.5382	-1.02879	2.11356	-0.35862	0.598649	-0.882844	1.62188	-0.416169	0.508612
CHD4	Chromodomain-helicase-DNA-binding protein 4	Q14839	STAPETAIECTQAPAPASEDEKVVVEPPEGEEKVEK	1585	-1.14428	1.5382	-0.0516584	0.0436054	0.0854971	0.10166	-0.660929	1.06228	-0.492147	0.454692
CUX1	Protein CASP	Q13948	LQNDFAEK	179	0.303761	1.53787	0.0991012	0.396511	0.0193395	0.0504072	0.0594427	0.200155	-0.0743897	0.244645
NISCH	Nischarin	Q9Y2I1	QLPAWIEAANQR	617	0.578086	1.53704	0.163089	0.359807	-0.054701	0.105752	-0.0704009	0.133234	-0.542509	1.02976
APC	Adenomatous polyposis coli protein	P25054	SAEDPVSEVPAVSQHPR	1315	0.749178	1.53699	-0.337782	0.261167	-1.0103	0.690306	-0.410195	0.247857	0.279131	0.258787
JUP	Junction plakoglobin	P14923	AAMIVNQLSK	162	-0.618923	1.53692	-0.0569958	0.136561	-0.0108565	0.0259821	-0.348947	0.547716	0.0951741	0.247573
MRTO4	mRNA turnover protein 4 homolog	Q9UKD2	GEVGLLFTNR	98	-0.195101	1.53686	-0.0192984	0.113482	-0.175786	0.709862	0.0664064	0.391706	-0.0222023	0.0879412
SORBS3	Vinexin	O60504	HPSSPSALR	542	-0.742763	1.53587	0.233501	0.388443	0.0428313	0.0444041	0.265206	0.373124	0.335937	0.432706
MAP4K5	Mitogen-activated protein kinase kinase kinase kinase 5	Q9Y4K4	HCNIVAYFGSYLSR	74	0.78546	1.53557	0.283708	0.213093	0.591945	1.10809	0.501739	0.778478	1.01112	2.05737
NOL8	Nucleolar protein 8	Q76FK4	EIFQTTK	999	1.10551	1.53551	0.0986561	0.0599123	-0.0907376	0.0566499	-0.0728443	0.0403192	0.673907	0.794391
MTREX	Exosome RNA helicase MTR4	P42285	AIGNTELENK	1013	-1.46255	1.53383	0.124734	0.0593787	-0.25474	0.130075	-0.257698	0.150741	-0.127621	0.0544471
IGHMBP2	DNA-binding protein SMUBP-2	P38935	DIAVVSPYNLQVDLLR	534	1.63915	1.53372	0.215191	0.09704	-0.472099	0.226354	0.552631	0.275408	0.277625	0.111008
HSP90AA1	Heat shock protein HSP 90-alpha	P07900	KKLSELLR	457	-0.499665	1.53365	-0.471139	2.79624	-0.304884	0.889059	-0.137512	0.420025	-0.0852736	0.338843
ATRIP	ATR-interacting protein	Q8WXE1	LQSLQSELQFK	185	-0.260876	1.53362	-0.169425	0.847787	-0.0545207	0.180695	0.0937857	0.418598	0.0557329	0.195676
ADPRS	ADP-ribosylhydrolase ARH3	Q9NX46	AQFNGKGSYGNGGAMR	141	-0.487677	1.53305	-0.0946871	0.15748	0.0963263	0.188582	0.174464	0.401909	-0.428931	0.896225
ESCO2	N-acetyltransferase ESCO2	Q56NI9	VLSEPIGPESPSSTECPR	503	0.219827	1.53254	0.0291115	0.0673183	-0.0294912	0.0978936	0.0229537	0.080384	0.155581	0.710446
COG4	Conserved oligomeric Golgi complex subunit 4	Q9H9E3	AEENLLMVLGTDMSDRR	247	-0.321569	1.53243	0.180986	1.75402	0.148472	0.970651	0.237536	2.21284	0.165132	1.29956
SRP72	Signal recognition particle subunit SRP72	O76094	GTQGATAGASSELDASK	601	0.152534	1.53242	0.0407109	0.258318	0.0653773	0.58401	-0.0407979	0.314946	-0.0337305	0.239623
CCDC117	Coiled-coil domain-containing protein 117	Q8IWD4	REFDEVFTK	187	-1.18371	1.53235	-0.736397	0.478074	-0.372825	0.350858	-0.0897902	0.0554955	-1.01293	0.897557
EDC3	Enhancer of mRNA-decapping protein 3	Q96F86	ATDWLGSIVSINCGDSLGVYQGR	2	1.90581	1.53233	-0.32752	0.0958269	-0.661081	0.261237	-0.570642	0.244353	1.34142	0.937819
PA2G4	Proliferation-associated protein 2G4	Q9UQ80	GDAMIMEETGK	52	-0.864622	1.53209	-0.493196	0.696594	-0.560959	0.690574	-0.251362	0.332315	0.0422407	0.0284335
LARP1	La-related protein 1	Q6PKG0	RPRPPCAKPHKEGTGQQER	55	-0.735461	1.53127	-0.950677	1.76253	-0.445429	0.850832	-0.361287	0.513712	-0.69523	1.27808
MAP2K6	Dual specificity mitogen-activated protein kinase kinase 6	P52564	ACISIGNQNFEVK	37	-0.32143	1.53106	-0.0801642	0.235068	-0.061618	0.235428	-0.0819108	0.288156	-0.167118	0.959814
ERBB2	Receptor tyrosine-protein kinase erbB-2	P04626	CWGESSEDCQSLTR	204	0.434592	1.53086	-0.125161	0.239022	0.0724615	0.0885054	0.183669	0.448145	0.0491343	0.061869
WNK1	Serine/threonine-protein kinase WNK1	Q9H4A3	GLQHPNIVR	274	0.837732	1.53057	0.864419	1.86479	0.24538	0.36103	0.780172	1.24393	0.52649	0.649788
COL9A2	Collagen alpha-2(IX) chain	Q14055	GVPGIVGAVGQIGNTGPK	580	-0.155018	1.53038	-0.104795	0.660806	-0.120689	1.03449	-0.22835	1.79458	-0.203152	1.36405
PDP1	[Pyruvate dehydrogenase [acetyl-transferring]]-phosphatase 1, mitochondrial	Q9P0J1	ANEYSFKVPEFDGK	91	0.595878	1.53012	0.302786	0.765807	-0.0102929	0.0125258	-0.114812	0.153373	0.0175531	0.0264892
EPS15	Epidermal growth factor receptor substrate 15	P42566	ELDTLNNEIVDLQR	334	-1.20281	1.52984	-0.569554	0.692635	-0.579799	0.864249	-0.676395	0.967219	-1.46635	1.26757
PARS2	Probable proline--tRNA ligase, mitochondrial	Q7L3T8	VFQPQNLREDR	45	0.146184	1.52973	-0.0196715	0.118301	-0.0918532	0.454339	-0.253471	0.684458	-0.178009	1.24159
NUMA1	Nuclear mitotic apparatus protein 1	Q14980	VASENLR	1306	-0.893876	1.52938	-0.402851	0.53874	-0.697801	1.24272	-0.535186	0.839635	-0.493042	0.631552
STAG1	Cohesin subunit SA-1	Q8WVM7	GLMEEDAEPIFEDVMMSSR	1188	-0.433965	1.52934	0.013729	0.0413577	0.0471634	0.161348	-0.135905	0.423045	-0.137554	0.445319
SUPT5H	Transcription elongation factor SPT5	O00267	GIYKDDIAQVDYVEPSQNTISLK	284	-0.321863	1.52913	-0.303551	2.04411	-0.384415	1.51696	-0.501668	1.723	-0.380154	1.68657
SHROOM3	Protein Shroom3	Q8TF72	GQEEMLPLFHHLTPR	1284	-0.245779	1.52856	0.0753807	0.465761	0.13555	1.48669	0.234095	2.70408	0.0136775	0.0464358
XRCC3	DNA repair protein XRCC3	O43542	LQQLMAQQPR	151	0.928916	1.52853	0.561789	0.712111	0.552756	0.750742	0.790013	1.19669	0.719181	1.07382
RMDN1	Regulator of microtubule dynamics protein 1	Q96DB5	MLFATPPSSTYEK	231	-0.220043	1.52791	-0.0504039	0.334926	-0.0229188	0.145162	0.0213288	0.118704	-0.0325522	0.269147
CTU2	Cytoplasmic tRNA 2-thiolation protein 2	Q2VPK5	DGPAAGDSGPR	377	0.708322	1.52786	-0.620057	0.345323	0.0276053	0.0327776	-0.278805	0.348203	-0.278191	0.468549
ABRACL	Costars family protein ABRACL	Q9P1F3	MNVDHEVNLLVEEIHR	1	-0.126866	1.52743	0.0390033	0.370864	0.119147	1.31156	-0.0187339	0.0807675	-0.0121349	0.0596496
THRAP3	Thyroid hormone receptor-associated protein 3	Q9Y2W1	SIFQHIQSAQSQR	609	0.0932835	1.52727	-0.00823847	0.0745316	-0.0146341	0.157613	0.0665591	0.953689	0.0387853	0.489744
KCNQ5	Potassium voltage-gated channel subfamily KQT member 5	Q9NR82	KSFDMGGETLLSVCPMVPK	806	-1.72046	1.52708	-1.47742	1.40184	0.196645	0.299191	-0.41301	0.23744	0.0105572	0.00655701
PKP2	Plakophilin-2	Q99959	RLEISPDSSPER	147	-0.622537	1.52676	-0.303965	0.387112	0.148787	0.215739	-0.344645	0.530557	0.154234	0.309023
IBTK	Inhibitor of Bruton tyrosine kinase	Q9P2D0	KFDFSNLSSR	726	0.165415	1.52674	0.127237	1.04981	0.111525	0.755801	0.113481	0.806909	0.105051	0.70327
PRUNE1	Exopolyphosphatase PRUNE1	Q86TP1	GDIVFFLQK	67	-1.29902	1.52656	-0.358641	0.372372	-0.251885	0.284107	-0.125081	0.0942669	-0.43531	0.359616
COG3	Conserved oligomeric Golgi complex subunit 3	Q96JB2	QMLEDVQER	455	-1.00863	1.5265	0.300785	0.311957	0.470738	0.511487	0.351534	0.338091	0.882763	1.17674
PRPF31	U4/U6 small nuclear ribonucleoprotein Prp31	Q8WWY3	ELGNSLDKCK	141	0.239634	1.52644	-0.0772431	0.339211	-0.142737	1.04248	-0.0337141	0.120031	0.0119769	0.0556183
AFG3L2	AFG3-like protein 2	Q9Y4W6	DVAGCEEAKLEIMEFVNFLK	309	1.00858	1.52633	0.999898	1.51699	0.736126	0.746017	0.0972349	0.0823584	0.999582	0.902848
ACAT1	Acetyl-CoA acetyltransferase, mitochondrial	P24752	GQPDVVVKEDEEYK	244	-0.370533	1.52633	0.0120005	0.0348522	-0.271704	0.701987	-0.0210691	0.041132	0.00212729	0.0046191
NFATC3	Nuclear factor of activated T-cells, cytoplasmic 3	Q12968	CQGAHIVLEVPPYHNPAVTAAVQVHFYLCNGKR	655	2.4051	1.52615	-1.16216	0.408739	-0.108236	0.0331662	-0.870287	0.297425	-0.316733	0.104828
ARHGAP32	Rho GTPase-activating protein 32	A7KAX9	GIPDTSEPVSYHNSGVK	1910	0.751153	1.52609	0.0854859	0.0560716	-0.181252	0.17688	-0.112816	0.0846304	0.168212	0.101268
TTC7A	Tetratricopeptide repeat protein 7A	Q9ULT0	DGSFGEGLTMK	645	-3.88623	1.52608	1.01562	0.386883	-4.21993	1.58904	-0.632299	0.149528	-2.84981	0.898606
EIF4G1	Eukaryotic translation initiation factor 4 gamma 1	Q04637	FMLQDVLDLR	977	-0.196299	1.52603	-0.0912713	0.511441	-0.0592839	0.250583	0.127136	0.527407	0.00900942	0.0434948
ACAA1	3-ketoacyl-CoA thiolase, peroxisomal	P09110	GGFKDTTPDELLSAVMTAVLK	54	1.51002	1.52567	0.794519	0.511282	1.56637	0.995654	-1.13462	0.935995	0.638099	0.425317
ZC3H4	Zinc finger CCCH domain-containing protein 4	Q9UPT8	AAAAPAATTATPPPEGAPPQPGVHNLPVPTLFGTVK	1225	0.313828	1.52551	0.0512963	0.140048	-0.146744	0.286079	-0.168554	0.471911	-0.230587	0.780556
ALKBH5	RNA demethylase ALKBH5	Q6P6C2	AVIILRK	278	-1.02538	1.52514	-1.0274	1.00538	-0.0872068	0.157527	-0.502974	1.27348	-0.101455	0.186071
ALDH2	Aldehyde dehydrogenase, mitochondrial	P05091	TEQGPQVDETQFK	356	0.11874	1.52509	0.010115	0.0815886	0.0375896	0.391705	0.0266595	0.205214	0.12587	1.53965
PRDM10	PR domain zinc finger protein 10	Q9NQV6	FISSEQLQQHLNSHDEKLDVFSR	364	1.15485	1.52501	0.19733	0.170006	0.291613	0.215124	-0.223379	0.193936	0.0259109	0.01861
ASXL2	Putative Polycomb group protein ASXL2	Q76L83	DLIQAAQK	1264	0.172081	1.52469	-0.0226863	0.0885189	-0.0510845	0.207086	-0.0468106	0.105436	-0.0577922	0.32502
KANSL3	KAT8 regulatory NSL complex subunit 3	Q9P2N6	TPVLFVIGQNSLQCHPEAMEDFREK	398	-0.962168	1.52463	-0.959584	1.31945	-0.775095	1.22867	-0.612808	0.915259	-0.807991	0.779279
RBM14	RNA-binding protein 14	Q96PK6	TQSSASLAASYAAQQHPQAAASYR	518	0.0937062	1.52451	-0.0109909	0.119015	-0.0171494	0.167629	-0.0355214	0.492615	-0.0314328	0.315922
SH3BP4	SH3 domain-binding protein 4	Q9P0V3	ALLDPPLELNSDR	358	0.54643	1.52434	0.537784	0.954892	0.558962	1.37676	0.45779	1.12337	0.55901	1.4929
DSP	Desmoplakin	P15924	GAGSIAGASASPK	2014	-1.96509	1.52415	-0.0117011	0.0120129	0.322543	0.476765	0.192386	0.240308	0.240862	0.219093
AVEN	Cell death regulator Aven	Q9NQS1	ALQELPLCLR	186	1.32541	1.52412	0.776747	0.510092	0.275462	0.14138	1.16855	0.788455	1.27284	1.44338
RACK1	Small ribosomal subunit protein RACK1	P63244	YTVQDESHSEWVSCVR	140	0.41345	1.52409	0.269798	0.946608	0.24162	0.906681	0.352213	1.45212	0.118798	0.152316
HEATR5B	HEAT repeat-containing protein 5B	Q9P2D3	ACQVCSTWIGSGVVSDLNDLRR	1366	0.387457	1.52328	0.0732976	0.128458	0.0221433	0.0554362	-0.255362	0.964092	0.217869	0.716623
HMCES	Abasic site processing protein HMCES	Q96FZ2	SGSIGAADSPENWEK	152	0.779336	1.52316	0.489083	0.703183	0.577466	0.902296	0.686353	1.25315	0.0351887	0.0318498
UMPS	Uridine 5'-monophosphate synthase	P11172	MAEEHSEFVVGFISGSR	389	-0.286846	1.52288	-0.2247	0.488694	-0.354247	1.19051	0.156032	0.712766	-0.699117	3.37944
PMS1	PMS1 protein homolog 1	P54277	LDELLQSQIEKR	678	0.277851	1.5228	0.136293	0.685939	0.154321	0.703141	0.116793	0.482039	0.183721	0.909701
GINS4	DNA replication complex GINS protein SLD5	Q9BRT9	VSIHQMEMER	75	-3.66436	1.52279	-1.53485	0.453669	-3.07137	0.861839	0.83695	0.294437	-0.264568	0.0597603
ODF2	Outer dense fiber protein 2	Q5BJF6	LVEAEMDGAAAAK	211	-0.800619	1.52221	-0.483671	0.779669	-0.547468	0.803311	-0.541868	0.362993	-0.288191	0.435775
NAA25	N-alpha-acetyltransferase 25, NatB auxiliary subunit	Q14CX7	MAIQQADK	29	-1.93157	1.52192	-0.214121	0.280784	-0.221694	0.114586	0.339491	0.547661	0.0232831	0.0151071
INTS6	Integrator complex subunit 6	Q9UL03	LLDLNMK	516	-0.831932	1.52184	-0.834699	1.25198	-0.574743	0.619214	-1.469	2.7828	-0.783106	0.817902
CDH1	Cadherin-1	P12830	DWVIPPISCPENEKGPFPK	155	0.915067	1.52177	0.801552	1.32678	0.677852	0.806972	0.762522	1.25742	0.381429	0.384939
TUT4	Terminal uridylyltransferase 4	Q5TAX3	SLNSQLVYEYVVER	686	0.770965	1.52146	0.54795	0.935785	-0.0556071	0.0225458	0.516378	0.807483	0.534474	0.979278
MRPL47	Large ribosomal subunit protein uL29m	Q9HD33	ARPGAWR	163	1.33217	1.52135	1.18407	1.20139	1.50953	1.91566	1.54309	1.98904	0.721942	0.646027
POLR1A	DNA-directed RNA polymerase I subunit RPA1	O95602	QATMLGSHDELR	1683	0.776052	1.5212	0.228359	0.292763	0.431293	0.545965	0.728828	1.36489	0.812244	1.55597
INF2	Inverted formin-2	Q27J81	VTLLHHVLEEAEK	798	0.322097	1.52095	0.0754464	0.236319	-0.110214	0.173126	0.13779	0.600506	0.226582	0.847871
STAT2	Signal transducer and activator of transcription 2	P52630	HYQLLTEENIPENPLR	647	-0.464213	1.5208	0.298626	0.762027	-7.11446e-05	7.23426e-05	0.310239	0.879373	-0.0404644	0.0634785
NELFCD	Negative elongation factor C/D	Q8IXH7	GHDASQITLALGTAASYPR	273	-0.448666	1.52038	-0.511195	0.918435	-0.485922	1.32646	-0.489423	0.634289	0.141673	0.230162
PRRC2A	Protein PRRC2A	P48634	ATPSTYSGVFR	2092	1.74135	1.52013	0.225282	0.0875199	1.72035	1.56497	-0.0359737	0.014464	0.117292	0.0488813
SKP1	S-phase kinase-associated protein 1	P63208	TFNIKNDFTEEEEAQVRK	138	0.418345	1.52002	-0.0835999	0.284278	-0.0966736	0.264608	-0.192694	0.601085	-0.182663	0.638917
AKAP11	A-kinase anchor protein 11	Q9UKA4	QEGGNSELIMDQYANR	1355	1.36107	1.51966	0.501708	0.554846	1.44386	1.81975	1.28512	1.32118	0.494081	0.553902
BRIP1	Fanconi anemia group J protein	Q9BX63	ESASYSVTEVQLR	404	0.348078	1.51959	-0.0251156	0.0680525	0.204448	0.639091	0.146716	0.533941	0.345743	1.41152
ZMYM3	Zinc finger MYM-type protein 3	Q14202	TGEVLHEVSNGSVVHR	415	-0.746824	1.51945	-0.36973	1.03133	-0.450076	2.34096	-0.956141	3.25108	-0.283946	1.27347
RPS5	Small ribosomal subunit protein uS7	P46782	TIAECLADELINAAK	168	-0.232252	1.51908	-0.446249	1.11566	-0.280568	1.19808	-0.0252161	0.097779	-0.204494	0.646639
ARMC8	Armadillo repeat-containing protein 8	Q8IUR7	VNGIWALMNMAFQAEQK	486	2.79169	1.51899	2.53011	1.31957	1.60609	0.664445	0.834039	0.224785	1.48747	0.580884
PTK2	Focal adhesion kinase 1	Q05397	LLNSDLGELINK	989	-0.350582	1.51877	-0.0171063	0.0537922	0.198585	0.728203	0.13082	0.427711	0.287958	1.31031
NCOA6	Nuclear receptor coactivator 6	Q14686	FSSAPVPPNALSSSPAPNIQTGRPLVLSSR	1708	-0.90381	1.51842	-0.549407	0.863339	-0.488797	0.691488	-0.365243	0.324871	-1.02269	0.686545
MLX	Max-like protein X	Q9UH92	VNYEQIVK	213	-1.1884	1.51829	0.125873	0.195355	-0.523497	0.616401	0.258959	0.496466	-0.436255	0.361968
MTHFS	5-formyltetrahydrofolate cyclo-ligase	P49914	CLQHQEVKPYTLALAFK	160	0.545879	1.51822	-0.166833	0.309429	-0.311683	0.474579	0.0207428	0.0200893	0.130033	0.178414
GANAB	Neutral alpha-glucosidase AB	Q14697	QYASLTGTQALPPLFSLGYHQSR	378	0.448388	1.51817	0.183782	0.273131	0.0807933	0.160171	0.375807	0.732238	0.264843	0.487082
IDH3A	Isocitrate dehydrogenase [NAD] subunit alpha, mitochondrial	P50213	MGLKGPLKTPIAAGHPSMNLLLR	93	0.666969	1.51812	-0.122265	0.115015	-1.56379	3.17326	-1.49304	1.46342	-1.80031	2.543
PHYH	Phytanoyl-CoA dioxygenase, peroxisomal	O14832	KEVKPLGLTVMR	91	-1.31877	1.5175	0.297526	0.261783	-0.096516	0.0838662	0.0106658	0.00948626	0.585874	0.536819
VPS11	Vacuolar protein sorting-associated protein 11 homolog	Q9H270	AFLEHMSEVQPDSPQGIYDTLLELR	606	-0.737085	1.51701	0.292728	0.430585	0.5428	0.915532	0.0445794	0.0417921	0.286635	0.381244
SNX9	Sorting nexin-9	Q9Y5X1	GFLGCFPDIIGTHKGAIEK	498	1.0753	1.51683	0.687479	1.02243	0.614409	0.449755	0.530728	0.498033	0.617899	0.85128
KLC2	Kinesin light chain 2	Q9H0B6	RSSEMLVK	555	0.360078	1.51664	0.118195	0.268211	0.0517457	0.123069	0.244234	0.65032	-0.0663325	0.101251
LONRF2	LON peptidase N-terminal domain and RING finger protein 2	Q1L5Z9	AGRLPEALGAFR	71	0.331841	1.51652	-1.04178	0.579267	0.106256	0.357191	-0.0832995	0.197609	0.241488	0.818685
SNX3	Sorting nexin-3	O60493	QLPFRGDDGIFDDNFIEER	100	0.179967	1.5157	-0.0527384	0.187109	-0.054628	0.227725	-0.211382	0.87117	-0.0391519	0.341852
UQCC1	Ubiquinol-cytochrome c reductase complex assembly factor 1	Q9NVA1	DSPQPVEEK	81	0.161127	1.51565	0.0509905	0.237821	0.0570585	0.255015	-0.00679645	0.0161506	0.00517742	0.0251132
PBX1	Pre-B-cell leukemia transcription factor 1	P40424	QIYHTELEKYEQACNEFTTHVMNLLR	159	1.62876	1.51565	-0.109733	0.102737	0.448168	0.25483	0.430453	0.348554	1.29931	1.60512
MROH1	Maestro heat-like repeat-containing protein family member 1	Q8NDA8	SLVHLAQK	507	-1.13675	1.51546	-0.449911	0.692536	-1.28835	2.481	-0.526131	0.753933	-1.3845	2.8288
NCAPG2	Condensin-2 complex subunit G2	Q86XI2	LYKPILWR	330	0.23995	1.51542	0.107601	0.423119	0.0507416	0.154285	0.11277	0.351949	-0.337517	1.06118
ATP6V1E1	V-type proton ATPase subunit E 1	P36543	QDFPLVK	139	0.925959	1.51541	0.170387	0.163482	-0.524745	0.392332	-0.194449	0.150658	0.00629366	0.00505161
HSDL2	Hydroxysteroid dehydrogenase-like protein 2	Q6YN16	ALPCIVDVR	68	-0.376733	1.51493	-0.177253	0.3694	-0.22912	0.518046	-0.0964404	0.266053	-0.0929897	0.260134
SHC1	SHC-transforming protein 1	P29353	VEGGQLGGEEWTR	124	0.266981	1.5149	0.16166	0.786444	0.155471	0.572642	0.262396	1.50396	-0.460324	0.388096
C7orf50	Uncharacterized protein C7orf50	Q9BRJ6	EAGLVAQHPPAR	84	-1.26466	1.51461	-0.144738	0.163748	-0.650335	0.933863	-0.733972	0.736955	-0.74009	0.916671
RNASEH1	Ribonuclease H1	O60930	EVINKEDFVALER	237	0.817308	1.51458	0.493766	0.804009	0.716855	1.26673	0.869445	1.78698	0.803782	1.4733
KIF16B	Kinesin-like protein KIF16B	Q96L93	LREQQEIELQKK	684	-1.13645	1.51451	0.218534	0.309483	0.27116	0.402905	0.256376	0.36176	0.112171	0.126736
RBBP6	E3 ubiquitin-protein ligase RBBP6	Q7Z6E9	NVSTKPSNIVKYPEKESEPSEK	1351	0.522228	1.51449	0.628695	1.66406	0.435378	0.863656	0.37306	0.88722	0.602224	1.72026
GCN1	Stalled ribosome sensor GCN1	Q92616	ALADENEFVRDTALR	1785	0.129972	1.51448	0.0746945	0.647903	0.0765088	0.835581	-0.026673	0.210975	-0.00643785	0.0330198
ZHX2	Zinc fingers and homeoboxes protein 2	Q9Y6X8	KYDSLSDHNSK	121	-0.970742	1.51446	-0.478149	0.710185	-1.56462	2.31661	-0.201799	0.333982	-1.44775	1.96115
DYNC1H1	Cytoplasmic dynein 1 heavy chain 1	Q14204	QNISPDKIPWSALK	4231	0.205773	1.51423	-0.03484	0.128001	-0.0227342	0.0826006	0.0713833	0.476916	-0.0666535	0.214827
SELENOH	Selenoprotein H	Q8IZQ5	NAAALSQALRLEAPELPVK	50	0.926814	1.51372	0.58486	0.869163	0.62717	0.995209	0.290504	0.306591	0.905936	1.79774
MVB12B	Multivesicular body subunit 12B	Q9H7P6	FSCVPESMQPFDLLGITIK	265	-1.59012	1.5137	-0.829349	1.43071	-0.572128	0.708681	-0.706881	0.614442	-1.7686	1.38478
EMG1	Ribosomal RNA small subunit methyltransferase NEP1	Q92979	ELVPSSDPIVFVVGAFAHGK	188	-0.731675	1.51353	0.0368738	0.0308543	0.0213821	0.0144439	0.292427	0.244417	-0.0518032	0.0346332
KIF15	Kinesin-like protein KIF15	Q9NS87	DSKLTFLLR	317	-1.18773	1.5134	-0.191538	0.144594	-0.310345	0.313812	-0.233594	0.252493	-0.0772343	0.072533
PSMB5	Proteasome subunit beta type-5	P28074	ATAGAYIASQTVK	79	-0.734365	1.51332	-0.07004	0.0942789	-0.0233799	0.0279948	-0.352528	0.530431	-0.0324848	0.0428276
SYNE2	Nesprin-2	Q8WXH0	SKTSLQQSLNEISGQSVAEQLQK	4652	1.35783	1.51329	0.564965	0.338705	0.616423	0.339667	1.20767	0.820939	1.23638	1.21444
EEF2	Elongation factor 2	P13639	RWLPAGDALLQMITIHLPSPVTAQK	342	-1.3266	1.51328	-1.22585	0.663889	-0.629876	0.764942	-0.574284	0.477775	-1.12596	0.613629
CDK1	Cyclin-dependent kinase 1	P06493	DLKPQNLLIDDK	128	0.819686	1.51297	0.393074	0.524544	-0.0794262	0.0770021	-0.349971	0.274072	-0.384136	0.257907
POLI	DNA polymerase iota	Q9UNA4	QLPVDIQEEILSGK	534	0.203998	1.51292	-0.0420061	0.155588	-0.0292664	0.127161	0.0229323	0.101449	-0.0697007	0.315169
WDR70	WD repeat-containing protein 70	Q9NW82	IKGEFMTCSNDATVR	295	-0.746178	1.51277	-0.975591	1.7356	-0.0330921	0.0421808	0.152604	0.22491	0.346858	0.695665
TEX2	Testis-expressed protein 2	Q8IWB9	SFFKVPEMEAK	276	0.274056	1.51258	0.0758287	0.224111	0.249418	1.09264	0.217105	1.20284	0.191204	0.8155
EIF4EBP2	Eukaryotic translation initiation factor 4E-binding protein 2	Q13542	VEVNNLNNLNNHDR	93	-0.928984	1.51223	-0.265287	0.362766	0.0315459	0.0418093	-0.547578	0.543666	-0.421736	0.43998
RPS3A	Small ribosomal subunit protein eS1	P61247	VVDPFSKK	21	0.109362	1.51215	0.0385615	0.431734	-0.00781756	0.072153	-0.000325693	0.00197182	-0.0316961	0.258482
ATPAF1	ATP synthase mitochondrial F1 complex assembly factor 1	Q5TC12	AQSCPTFLCALPR	191	-0.946602	1.51164	-0.432289	0.419983	-0.110259	0.0946733	-0.659241	0.348675	-0.654886	0.77645
WIZ	Protein Wiz	O95785	TSHSSTEACCELCGLYFENR	1390	-0.495449	1.51104	-0.0364397	0.109617	-0.0406078	0.164408	-0.110755	0.360965	-0.0699541	0.308311
TNRC6C	Trinucleotide repeat-containing gene 6C protein	Q9HCJ0	SDAGHWNAPCLGGK	1874	-1.30282	1.51097	-0.356383	0.33141	-0.366298	0.222485	-0.346217	0.235874	-0.138121	0.0963147
ECI2	Enoyl-CoA delta isomerase 2	O75521	QNYVDLVSSLSPSLESSSQVEPGTDRK	109	0.223538	1.51097	-0.0470353	0.18483	0.0324531	0.112741	-0.0707039	0.331385	-0.0446528	0.221912
C1orf226	Uncharacterized protein C1orf226	A1L170	VLPNGEVSLSVPDLIHK	189	-0.569246	1.51052	-0.0254787	0.0377017	0.0329647	0.0539329	-0.107893	0.228629	-0.0361806	0.0955291
THRAP3	Thyroid hormone receptor-associated protein 3	Q9Y2W1	KYYLHDDREGEGSDK	879	-1.29305	1.51035	0.075548	0.172778	0.0829548	0.15226	0.305478	0.870235	0.420398	1.38305
YWHAH	14-3-3 protein eta	Q04917	EAFEISK	156	0.288924	1.50973	0.0723397	0.224895	-0.295495	0.467307	0.0631879	0.241372	0.216638	0.692069
SLMAP	Sarcolemmal membrane-associated protein	Q14BN4	ENVLLSSELQR	679	0.16364	1.50971	0.0659139	0.476744	0.11971	1.07904	0.0549171	0.351481	0.0232419	0.0936084
DUS1L	tRNA-dihydrouridine(16/17) synthase [NAD(P)(+)]-like	Q6P1R4	ETADCPGHGLLFK	422	0.902861	1.50959	0.750854	1.30558	0.573406	0.92957	0.408366	0.557834	1.01927	1.75809
VIM	Vimentin	P08670	HLREYQDLLNVK	379	-1.4647	1.50954	-0.361492	0.357132	-0.407337	0.410093	0.206551	0.176561	-0.252322	0.195445
LSM5	U6 snRNA-associated Sm-like protein LSm5	Q9Y4Y9	ITKLDQILLNGNNITMLVPGGEGPEV	66	-1.72416	1.50923	-0.231949	0.10766	-1.47986	0.929534	-1.14457	0.676427	-0.723929	0.391478
HEATR5B	HEAT repeat-containing protein 5B	Q9P2D3	VLSGLGGAAASSHR	163	0.55541	1.50922	0.251672	0.406893	0.63261	1.77683	0.259761	0.514572	0.386863	0.558446
DHX9	ATP-dependent RNA helicase A	Q08211	FESILPRPHASIMFCTVGVLLR	475	-1.1533	1.50901	0.0571082	0.0398386	0.410034	0.372987	0.558435	0.596945	0.312198	0.268208
DARS2	Aspartate--tRNA ligase, mitochondrial	Q6PI48	DFDGLVQVIIPQDESAASVKK	85	0.162679	1.50899	0.0428867	0.332015	-0.0233291	0.123825	-0.241175	2.15941	-0.086448	0.604857
EHBP1L1	EH domain-binding protein 1-like protein 1	Q8N3D4	VLESPENK	961	2.20365	1.50896	1.51669	0.74144	1.02728	0.3948	2.33079	1.70029	1.16117	0.502137
CCAR1	Cell division cycle and apoptosis regulator protein 1	Q8IX12	EISTPTHWSKLDPK	624	-0.467175	1.50892	-0.0731493	0.166286	-0.120524	0.298088	-0.0437666	0.0762832	-0.333086	1.18984
LARP4B	La-related protein 4B	Q92615	RPAGGRPSPSAMGKR	711	0.937792	1.50862	0.132898	0.105966	-0.00760902	0.00518651	-0.107578	0.0879072	0.45205	0.53346
NELFCD	Negative elongation factor C/D	Q8IXH7	VPAFLDLFMQSLFKPGAR	330	1.41105	1.50855	-0.985404	0.48615	0.387467	0.11669	0.031825	0.0144292	-0.286653	0.113738
STRN	Striatin	O43815	ALLGFSSDVTDREDDKNQDSVVNGTEAEVK	185	-1.41637	1.50853	0.220322	0.467976	0.310847	1.01505	-0.140617	0.160171	-0.158059	0.298007
LPIN3	Phosphatidate phosphatase LPIN3	Q9BQK8	AERPESSVVLEGR	257	-0.714553	1.50851	-0.868935	1.08969	-0.619551	0.786028	-0.19136	0.261102	-1.54779	2.88591
SVIL	Supervillin	O95425	GRGAANDSTQFTVAGR	1202	-0.624446	1.50839	-0.413977	1.11543	-0.241944	0.754869	-0.127817	0.381269	-0.034852	0.0876427
CLIP1	CAP-Gly domain-containing linker protein 1	P30622	LLDLDALRK	773	-0.279917	1.50823	-0.0747641	0.156434	0.127893	0.215552	0.376419	1.54235	0.411138	2.37578
NAE1	NEDD8-activating enzyme E1 regulatory subunit	Q13564	TYGLVGYMR	155	-1.39845	1.50819	-0.188747	0.0945594	-0.0571579	0.0283555	0.74213	0.517784	-0.367356	0.164147
AHNAK	Neuroblast differentiation-associated protein AHNAK	Q09666	GEIDASVPELEGDLRGPQVDVK	1797	-1.25385	1.50791	-0.43848	0.653106	-0.88343	1.57204	-0.206958	0.341868	-1.48456	0.828163
CCZ1B	Vacuolar fusion protein CCZ1 homolog B;Vacuolar fusion protein CCZ1 homolog	P86790	AAAAAGAGSGPWAAQEK	2	0.153638	1.50788	0.123437	1.09934	0.120091	0.974601	0.148174	1.43753	0.00337196	0.012455
FAM117B	Protein FAM117B	Q6P1L5	ATVPFQLK	37	2.68266	1.50782	0.872284	0.300036	0.760565	0.203733	1.46916	0.54982	1.73738	0.615539
SUPT6H	Transcription elongation factor SPT6	Q7KZ85	FGLTPEQFGENLR	539	-1.6838	1.50744	-0.194466	0.230299	-0.438685	0.354628	-0.716157	0.612369	-0.0133735	0.014052
CEP131	Centrosomal protein of 131 kDa	Q9UPN4	AATCEGSESSGFGKLPK	215	-1.0498	1.50739	0.749194	0.873393	0.0886264	0.064957	0.180949	0.11402	0.409504	0.440863
MTHFD1	C-1-tetrahydrofolate synthase, cytoplasmic	P11586	LVGPEGFVVTEAGFGADIGMEK	658	0.170885	1.50731	0.277645	2.88442	0.265568	1.96303	0.17281	1.16668	0.281377	2.0539
DTYMK	Thymidylate kinase	P23919	STEIGKLLSSYLQK	46	0.721796	1.50727	-0.133716	0.160338	-0.735652	0.851103	-0.37444	0.546569	-0.224527	0.314994
DIDO1	Death-inducer obliterator 1	Q9BTC0	EPGPHALGMSGLHGPNFPGPR	1755	-0.557495	1.50713	-0.0285219	0.0560252	0.155143	0.402014	0.246778	0.585218	0.106377	0.213475
DOCK9	Dedicator of cytokinesis protein 9	Q9BZ29	TEASQLLYFLMR	1495	0.910452	1.50707	0.835694	1.21261	0.272849	0.280765	0.437821	0.466782	0.0927072	0.0766407
POLD1	DNA polymerase delta catalytic subunit	P28340	FMVDTDIVGCNWLELPAGK	254	-0.733886	1.507	-0.161691	0.366496	-0.158579	0.265185	-0.241998	0.481002	-0.138735	0.209665
RABGAP1	Rab GTPase-activating protein 1	Q9Y3P9	VLFMTTAVDLVITEVQEPVR	404	1.95296	1.50698	0.171633	0.0589268	1.32622	0.855735	0.668721	0.374446	1.53069	0.941613
POLD1	DNA polymerase delta catalytic subunit	P28340	GLLPQILENLLSAR	654	-2.52011	1.50677	-0.881285	0.651634	-1.05126	0.786213	-1.09282	0.396126	-0.992124	0.678306
[truncated: 101,907 more rows]

## Sheet: B dose-response curves
Genes	ProteinDescriptions	UniProtIds	Sequences	Sequence start position	Ratio_E2 treatment vs Vehicle						EC50 (uM)	R2	lower	upper
					0nM vs. 0nM	10nM vs. 0nM	100nM vs. 0nM	1uM vs. 0nM	10uM vs. 0nM	100uM vs. 0nM
EIF3F	Eukaryotic translation initiation factor 3 subunit F	O00303	TCFSPNRVIGLSSDLQQVGGASAR	255	1	0.993401	0.977429	0.941064	0.878147	0.817048	8.90748	1	0.76282	1.00029
BZW1	eIF5-mimic protein 2	Q7L1Q6	GFEDEVK	127	1	1.00662	1.03588	1.13844	1.21837	1.23669	0.706795	1	1.0005	1.23942
SRRM1	Serine/arginine repetitive matrix protein 1	Q8IYB3	HRPSPPATPPPK	399	1	0.917095	0.849303	0.790734	0.755888	0.740981	0.05835	1	0.73211	1.00005
MBD4	Methyl-CpG-binding domain protein 4	O95243	MAIPVLWK	473	1	1.03126	1.11863	1.25801	1.3485	1.38148	0.356852	0.9999	0.998841	1.3899
INTS3	Integrator complex subunit 3	Q68E01	EKPSEEMVK	851	1	1.00325	1.00279	1.00885	1.12547	1.24017	9.88665	0.9999	1.00193	1.24688
PTPN23	Tyrosine-protein phosphatase non-receptor type 23	Q9H3S7	ASFTNSELHR	508	1	0.975991	0.894295	0.773893	0.724135	0.719834	0.188403	0.9999	0.716345	0.999566
ZWILCH	Protein zwilch homolog	Q9H900	FLLVLADGLR	271	1	0.998702	1.00721	1.06776	1.30077	1.38137	3.60724	0.9999	1.00009	1.38835
CAPRIN1	Caprin-1	Q14444	YQEVTNNLEFAK	99	1	1.02113	1.03426	1.04274	1.04491	1.04628	0.014314	0.9998	1.00001	1.04658
DDX1	ATP-dependent RNA helicase DDX1	Q92499	GIDIHGVPYVINVTLPDEKQNYVHR	578	1	1.19391	1.9298	2.40282	2.43664	2.4553	0.058373	0.9998	1.00256	2.45406
SEPTIN9	Septin-9	Q9UHD8	ITADLLSNGIDVYPQKEFDEDSEDRLVNEK	461	1	1.00529	1.00127	0.989325	0.798199	0.763674	4.15423	0.9998	0.763272	1.00224
ACTN4	Alpha-actinin-4	O43707	AIMTYVSSFYHAFSGAQK	256	1	1.05467	1.0687	1.23907	1.94145	3.1752	29.9675	0.9997	1.0245	4.04185
P4HB	Protein disulfide-isomerase	P07237	LAKVDATEESDLAQQYGVR	79	1	1.04172	1.09796	1.25926	1.46875	1.646	3.83811	0.9997	1.00151	1.76336
RBM10	RNA-binding protein 10	P98175	LACLLCR	759	1	1.43986	1.63705	1.77477	1.81541	1.82991	0.008575	0.9997	1.00026	1.84308
PKN2	Serine/threonine-protein kinase N2	Q16513	APQMNINIATWGR	507	1	1.06315	1.12072	1.1748	1.22258	1.24555	0.17136	0.9997	0.99976	1.26514
DOCK6	Dedicator of cytokinesis protein 6	Q96HP0	TILTYAEEDMGLR	1531	1	1.00193	1.07634	1.08065	1.07879	1.08075	0.035263	0.9997	0.999941	1.08007
EXOC5	Exocyst complex component 5	O00471	IKEAADIIQK	156	1	0.940573	0.89804	0.842644	0.795145	0.771817	0.272678	0.9996	0.745297	0.999576
LRCH4	Leucine-rich repeat and calponin homology domain-containing protein 4	O75427	ALEEAVATGTLNLSNRR	37	1	0.987984	0.985936	0.944664	0.817445	0.620926	27.7388	0.9996	0.462621	0.996112
UBR5	E3 ubiquitin-protein ligase UBR5	O95071	LLRIDELQVVK	710	1	0.964497	0.948564	0.945481	0.94456	0.943471	0.004971	0.9996	0.944127	1
EEF1B2	Elongation factor 1-beta	P24534	LVPVGYGIKK	177	1	1.00085	0.992919	0.985166	0.917433	0.742827	46.1677	0.9996	0.611516	0.998781
DCTN2	Dynactin subunit 2	Q13561	VSALDLAVLDQVEAR	268	1	1.00268	0.99242	0.920491	0.882709	0.878559	0.614503	0.9996	0.879254	1.00158
TUT4	Terminal uridylyltransferase 4	Q5TAX3	IAIEDPFSVKR	671	1	1.0082	1.02223	1.07181	1.12847	1.14855	1.23406	0.9996	1.00168	1.15481
SEPTIN8	Septin-8	Q92599	FSNAEPEPR	9	1	1.07654	1.11393	1.13557	1.15028	1.15216	0.01073	0.9996	0.999995	1.15577
PIK3R4	Phosphoinositide 3-kinase regulatory subunit 4	Q99570	ISTRPFLNNIEKR	114	1	1.17388	2.88582	2.88725	2.84249	2.85285	0.013887	0.9996	0.999938	2.8671
ARHGEF38	Rho guanine nucleotide exchange factor 38	Q9NXL2	ALDDAFAAVK	267	1	0.814967	0.782155	0.772606	0.762009	0.75943	0.000495	0.9996	0.758213	1.00001
NUMA1	Nuclear mitotic apparatus protein 1	Q14980	VCPPHLK	1929	1	0.973298	0.943401	0.883287	0.830797	0.802909	0.739542	0.9995	0.784957	0.998963
MYBBP1A	Myb-binding protein 1A	Q9BQG0	LPAIALDLLR	264	1	1.00335	1.01698	1.14101	1.13769	1.14019	0.191939	0.9995	1.00164	1.13986
TES	Testin	Q9UGI8	MGLGHEQGFGAPCLKCK	10	1	0.9164	0.822525	0.664249	0.502635	0.424856	0.774087	0.9995	0.360761	0.997342
AP3D1	AP-3 complex subunit delta-1	O14617	ILIEDSDQNLK	310	1	0.992608	1.02927	1.18527	1.29458	1.30187	0.663264	0.9994	0.995873	1.30491
DSP	Desmoplakin	P15924	NTKIEVLEEELR	1031	1	0.990575	0.969061	0.925791	0.899207	0.886315	0.446507	0.9994	0.883925	0.999995
MCM4	DNA replication licensing factor MCM4	P33991	LSNKVEAIDVEEAK	749	1	1.00148	0.993114	1.0009	0.948595	0.69399	17.6825	0.9994	0.691842	0.998891
PRKDC	DNA-dependent protein kinase catalytic subunit	P78527	GIFTSEIGTK	2941	1	1.00377	0.9963	1.00397	1.03949	1.28506	15.1446	0.9994	1.00101	1.28512
CLTC	Clathrin heavy chain 1	Q00610	KFNALFAQGNYSEAAK	367	1	1.03586	1.05852	1.0798	1.0874	1.0913	0.029539	0.9994	1.00009	1.0936
CTPS2	CTP synthase 2	Q9NRF8	KLYGDVPFIEER	466	1	1.06003	1.18624	1.48786	1.83533	1.95147	1.04919	0.9994	1.00829	2.00475
MPST	3-mercaptopyruvate sulfurtransferase	P25325	TYEDIKENLESR	165	1	1.01054	0.994946	1.27452	1.76582	1.83533	1.67051	0.9993	0.996928	1.83417
NNT	NAD(P) transhydrogenase	Q13423	VTIAQGYDALSSMANIAGYK	183	1	0.990276	0.958002	0.909758	0.790361	0.650186	23.1093	0.9993	0.478361	0.999481
TRUB1	Pseudouridylate synthase TRUB1	Q8WWH5	FTGNIMQVPPLYSALKK	189	1	0.986287	0.98827	1.06972	1.37419	1.43017	2.79333	0.9993	0.990604	1.43203
PPP1R3D	Protein phosphatase 1 regulatory subunit 3D	O95685	AAGAPGAACRPGCSQK	85	1	0.995621	0.994086	0.964269	0.909943	0.875678	3.97282	0.9992	0.865739	0.999204
AHNAK	Neuroblast differentiation-associated protein AHNAK	Q09666	VDVNAPDVQAPDWHLK	2494	1	1.00095	0.999246	0.970531	0.950012	0.947081	0.834627	0.9992	0.947901	1.00073
NUMA1	Nuclear mitotic apparatus protein 1	Q14980	GRAQADLALEK	1014	1	0.961826	0.932096	0.91921	0.912239	0.913568	0.014842	0.9992	0.912463	1.00002
HUWE1	E3 ubiquitin-protein ligase HUWE1	Q7Z6Z7	SSESELCIETPK	3233	1	1.07914	1.09144	1.09705	1.10619	1.11463	0.001958	0.9992	0.999962	1.14595
CRLF3	Cytokine receptor-like factor 3	Q8IUI8	ENVEAAQSYR	18	1	0.736461	0.117351	0.089731	0.124798	0.099493	0.014804	0.9992	0.1047	0.999993
PNPT1	Polyribonucleotide nucleotidyltransferase 1	Q8TCS8	GITALQADIKLPGIPIK	553	1	1.03075	1.05207	1.28513	1.69093	2.05147	6.60274	0.9992	1.00062	2.22429
UBXN4	UBX domain-containing protein 4	Q92575	MLWFQGAIPAAIATAK	1	1	0.988359	0.963884	1.03544	1.3479	2.4121	28.6366	0.9992	0.989349	2.70808
P4HB	Protein disulfide-isomerase	P07237	ALAPEYAK	58	1	1.03332	1.03561	1.22258	1.61292	1.83045	3.82104	0.9991	1.00968	1.87993
TPR	Nucleoprotein TPR	P12270	KLELDILPLQEANAELSEK	1299	1	1.0002	0.97908	0.898631	0.817578	0.781425	1.30966	0.9991	0.775994	1.00309
MSH3	DNA mismatch repair protein Msh3	P20585	DAVLCVECGYK	245	1	0.992755	0.984574	0.940642	0.891598	0.870013	1.49791	0.9991	0.864541	0.998652
AK4	Adenylate kinase 4	P27144	AVILGPPGSGK	8	1	0.998694	1.01164	1.07065	1.06847	1.0712	0.174789	0.9991	0.999333	1.07029
NAPG	Gamma-soluble NSF attachment protein	Q99747	EMQKLPEAVQLIEK	87	1	1.11278	1.29917	1.29106	1.30243	1.29735	0.012165	0.9991	1.00009	1.29787
CDK2AP1	Cyclin-dependent kinase 2-associated protein 1	O14519	SYKPNLAAHMPAAALNAAGSVHSPSTSMATSSQYR	2	1	1.17746	1.42929	1.50945	1.51662	1.5391	0.020732	0.999	0.99978	1.52761
PRKAR2A	cAMP-dependent protein kinase type II-alpha regulatory subunit	P13861	CLVMDVQAFER	359	1	1.00203	1.01251	1.02691	1.14745	1.32888	14.6721	0.999	1.00439	1.37
CHERP	Calcium homeostasis endoplasmic reticulum protein	Q8IWX8	GVGVALDDPYENYR	885	1	0.985801	0.992213	0.893095	0.709252	0.700962	1.42532	0.999	0.701054	0.993407
CRYBG1	Beta/gamma crystallin domain-containing protein 1	Q9Y4K1	VFNFNSSSTSHSSLK	903	1	1.13075	1.15943	1.16672	1.16448	1.16721	0.000996	0.999	0.999739	1.16766
DDX39A	ATP-dependent RNA helicase DDX39A	O00148	AEQDVENDLLDYDEEEEPQAPQESTPAPPKK	2	1	1.00124	0.98542	0.791506	0.680726	0.69368	0.665955	0.9989	0.685832	0.999768
HADHA	Trifunctional enzyme subunit alpha	P40939	TVLGTPEVLLGALPGAGGTQRLPK	167	1	1.01574	0.998074	0.96488	0.848392	0.540682	79.7662	0.9989	0.144726	1.0066
GMPS	GMP synthase [glutamine-hydrolyzing]	P49915	KPHTLLQR	478	1	0.999265	1.00882	1.04748	1.12847	1.13988	1.72715	0.9989	1.00109	1.1416
BCLAF1	Bcl-2-associated transcription factor 1	Q9NYF8	SIFDHIKLPQASK	587	1	0.993427	0.979675	0.933529	0.912173	0.907162	0.396002	0.9989	0.907119	0.998467
MAD2L2	Mitotic spindle assembly checkpoint protein MAD2B	Q9UI95	EVYPVGIFQK	35	1	1.01676	0.998056	0.712438	0.628491	0.637899	0.54271	0.9989	0.632886	1.00817
OSBPL2	Oxysterol-binding protein-related protein 2	Q9H1P3	AKEEAEWQTR	438	1	1.02626	1.06487	1.23835	1.55834	2.05333	20.6332	0.9988	1.00552	2.45924
P4HB	Protein disulfide-isomerase	P07237	EADDIVNWLKK	121	1	0.996588	1.06291	1.27393	1.69296	1.77974	1.80057	0.9987	1.00504	1.7964
PABPC1	Polyadenylate-binding protein 1	P11940	SKGFGFVSFER	230	1	0.988816	0.896329	0.758769	0.695721	0.670113	0.266611	0.9987	0.672022	1.00471
KIF5B	Kinesin-1 heavy chain	P33176	ILQDSLGGNCR	285	1	1.00028	1.01388	0.997662	1.09856	1.42451	19.1187	0.9987	1.00268	1.4408
GANAB	Neutral alpha-glucosidase AB	Q14697	KLVAIVDPHIK	462	1	1.07459	1.17229	1.28398	1.43578	1.54356	1.35337	0.9987	0.998705	1.63337
NISCH	Nischarin	Q9Y2I1	TDLGHILDFTCR	175	1	0.995055	0.997712	1.00916	1.0622	1.3244	13.6053	0.9987	1.00048	1.32443
ERCC6	DNA excision repair protein ERCC-6	Q03468	SVLDDLTSCTTSLR	135	1	0.999362	0.997074	0.999629	0.98061	0.927964	17.606	0.9986	0.925497	0.999082
FRMD4A	FERM domain-containing protein 4A	Q9P2Q2	QRLEELK	404	1	1.21892	1.07768	1.03938	4.11012	5.51857	8.48166	0.9986	1.08394	5.51862
FLOT1	Flotillin-1	O75955	VQVQVVER	254	1	0.862058	0.84117	0.829891	0.812234	0.789071	0.163701	0.9985	0.680946	1.00005
PLEC	Plectin	Q15149	SHRVPLDVACAR	3286	1	1.00103	0.919824	0.901172	0.906985	0.904728	0.068285	0.9985	0.904295	1.00053
PLEC	Plectin	Q15149	FLQEEAEKMK	2402	1	0.987079	0.894896	0.859157	0.862132	0.865731	0.046169	0.9985	0.862015	0.999702
NSL1	Kinetochore-associated protein NSL1 homolog	Q96IY1	MQPVIHLQR	207	1	0.934563	0.822026	0.82286	0.825923	0.816689	0.012204	0.9985	0.821733	1
VTA1	Vacuolar protein sorting-associated protein VTA1 homolog	Q9NP79	YAGSALQYEDVSTAVQNLQK	278	1	0.949963	0.794869	0.75678	0.765671	0.767654	0.025775	0.9985	0.763126	0.999902
ECH1	Delta(3	Q13011	TVTFSKL	322	1	1.00233	1.00204	1.01419	1.01358	1.31205	20.5624	0.9984	1.00463	1.31219
CREBBP	CREB-binding protein	Q92793	SALSSELSLVGDTTGDTLEK	2418	1	0.992513	0.983441	0.836273	0.779958	0.765223	0.561114	0.9984	0.770937	0.997083
USP9X	Probable ubiquitin carboxyl-terminal hydrolase FAF-X	Q93008	NAGATCYMNSVIQQLYMIPSIR	1561	1	1.32058	1.58963	1.84084	2.00265	2.00652	0.057315	0.9984	1.00195	2.05119
SNF8	Vacuolar-sorting protein SNF8	Q96H20	GKFAQDVSQDDLIR	133	1	1.00199	1.00193	0.998128	0.979146	0.954079	13.4884	0.9984	0.948544	1.00135
AK1	Adenylate kinase isoenzyme 1	P00568	RLETYYK	149	1	1.00373	0.979365	0.92949	0.923304	0.925005	0.176156	0.9983	0.9243	1.00219
GART	Trifunctional purine biosynthetic protein adenosine-3	P22102	AFTKPEEACSFILSADFPALVVK	126	1	1.03495	1.00586	1.05457	1.31185	1.76547	18.3496	0.9983	1.01331	1.88777
BRCA1	Breast cancer type 1 susceptibility protein	P38398	HSTVATECLSK	1244	1	1.4307	1.69116	1.75355	1.79495	1.82066	0.007929	0.9983	0.9996	1.80611
PATJ	InaD-like protein	Q8NI35	YATDTCELPEREEGEGEETPNFSHWGPPR	1039	1	0.996171	0.989644	0.880929	0.77795	0.746955	1.15543	0.9983	0.748357	1.00137
PPP1R12C	Protein phosphatase 1 regulatory subunit 12C	Q9BZL4	LAQLKVELER	708	1	1.01418	0.995461	0.94744	0.803825	0.725983	4.35132	0.9983	0.711161	1.00642
NCKAP1	Nck-associated protein 1	Q9Y2A7	FLSESLMWHISSQVAELKK	850	1	1.01363	1.18399	1.30538	1.30418	1.2917	0.077732	0.9983	1.00276	1.3014
PCCB	Propionyl-CoA carboxylase beta chain	P05166	SVTNEDVTQEELGGAK	233	1	1.09074	1.14045	1.16646	1.19602	1.20612	0.023069	0.9982	0.999872	1.21693
TP53BP1	TP53-binding protein 1	Q12888	ALIERPSQNNIGIQTMECSLR	1142	1	1.01319	1.01446	1.04893	1.25065	1.25092	1.58411	0.9982	1.00921	1.25096
RTCB	RNA-splicing ligase RtcB homolog	Q9Y3I0	QIGNVAALPGIVHR	68	1	1.00216	0.999187	1.05293	1.11152	1.12055	1.17312	0.9982	0.999476	1.11879
P4HB	Protein disulfide-isomerase	P07237	SNFAEALAAHK	32	1	1.03715	1.0332	1.32214	1.67111	1.75573	1.39866	0.9981	1.01021	1.75732
PFKL	ATP-dependent 6-phosphofructokinase	P17858	AVAFSPVTELKK	716	1	1.00227	1.0024	0.991092	0.99864	0.766426	35.5985	0.9981	0.76494	0.998975
YARS1	Tyrosine--tRNA ligase	P54577	NSVEVALNK	311	1	0.988811	0.978144	0.991463	0.964053	0.59804	21.9065	0.9981	0.595805	0.989606
USP9X	Probable ubiquitin carboxyl-terminal hydrolase FAF-X	Q93008	WVIPALK	565	1	1.00429	1.00039	1.04804	1.1424	1.2079	4.99416	0.9981	0.999114	1.22418
SDR39U1	Epimerase family protein SDR39U1	Q9NRG7	LETTQLLAK	83	1	0.979829	1.01466	1.0104	0.976531	0.320749	30.3267	0.9981	0.30138	1.00122
ST13	Hsc70-interacting protein	P50502	LAILYAKR	147	1	0.904776	0.829712	0.82696	0.819128	0.816236	0.009007	0.998	0.820228	1.00002
GTF2I	General transcription factor II-I	P78347	AQVAMSTLPVEDEESSESR	2	1	1.01113	1.30122	1.39655	1.37421	1.37481	0.054244	0.998	1.00068	1.38201
LLGL1	Lethal(2) giant larvae protein homolog 1	Q15334	GRPLPEPYEASR	800	1	0.955144	0.787491	0.768517	0.75205	0.760728	0.026303	0.998	0.759931	1.00012
TRMT10C	tRNA methyltransferase 10 homolog C	Q7L0Y3	LLLTSTEK	269	1	1.03225	1.06295	1.10393	1.12131	1.13801	0.152093	0.998	0.999987	1.14313
PSMD11	26S proteasome non-ATPase regulatory subunit 11	O00231	TAYSYFYEAFEGYDSIDSPK	227	1	0.997574	1.00529	0.994065	1.09851	1.19411	9.87902	0.9979	0.99918	1.19431
TRMT10C	tRNA methyltransferase 10 homolog C	Q7L0Y3	SSVQEECVSTISSSKDEDPLAATR	72	1	0.993558	1.00932	0.951773	0.804435	0.580816	19.0736	0.9979	0.469307	1.00258
MCCC1	Methylcrotonoyl-CoA carboxylase subunit alpha	Q96RQ3	EGSIEIDIPVPK	624	1	1.00695	1.03455	0.999141	1.13119	1.7158	20.4415	0.9979	1.00999	1.73562
PCF11	Pre-mRNA cleavage complex 2 protein Pcf11	O94913	VHEEVVLK	1412	1	1.00459	0.914173	0.897846	0.894073	0.891351	0.072217	0.9978	0.894423	1.0023
UQCRC1	Cytochrome b-c1 complex subunit 1	P31930	LCTSATESEVAR	379	1	0.967421	1.00696	1.07867	1.32429	2.711	29.8971	0.9978	1.00852	2.99006
SERPINH1	Serpin H1	P50454	DTQSGSLLFIGR	394	1	1.03004	1.01436	1.0037	0.823033	0.511978	14.8678	0.9978	0.480828	1.01471
SMC1A	Structural maintenance of chromosomes protein 1A	Q14683	LYHNEVEIEK	228	1	1.00435	1.00385	0.996772	0.94813	0.93064	4.87754	0.9978	0.929907	1.00278
RNF213	E3 ubiquitin-protein ligase RNF213	Q63HN8	ATHYHLSSQVQEMAGK	1208	1	0.987602	1.0391	1.16276	1.28185	1.32582	1.00175	0.9978	0.990886	1.33172
ATF7IP	Activating transcription factor 7-interacting protein 1	Q6VMQ6	TSLPTVGPSGLYSPSTNRGPIQMK	887	1	1.01225	1.07034	1.20788	1.34981	1.36182	0.709201	0.9978	1.00239	1.37552
DDX1	ATP-dependent RNA helicase DDX1	Q92499	LRELLIIGGVAAR	318	1	0.980247	1.01045	1.06388	1.25632	1.9533	38.7155	0.9978	1.00303	2.31222
DICER1	Endoribonuclease Dicer	Q9UPY3	NKQMEAEFR	491	1	0.985148	0.96755	0.814407	0.468534	0.48643	1.16582	0.9978	0.477465	0.984236
UFL1	E3 UFM1-protein ligase 1	O94874	YKTTQLLFLK	288	1	0.998732	1.01171	1.0385	1.17495	1.18806	2.31722	0.9977	1.00305	1.18877
SMC4	Structural maintenance of chromosomes protein 4	Q9NTJ3	SHGIDLDHNR	215	1	0.991643	0.990606	1.01405	1.10809	1.1724	6.66153	0.9977	0.993786	1.18049
SULT2B1	Sulfotransferase 2B1	O00204	IAGQLKDPGTPDQFLR	162	1	0.991391	1.0063	0.953012	0.830127	0.620713	25.9912	0.9976	0.480455	1.00113
PSAP	Prosaposin	P07602	NVIPALELVEPIKK	291	1	0.999655	0.98421	0.963686	0.931219	0.905582	3.79521	0.9976	0.887945	1.00151
OSBP	Oxysterol-binding protein 1	P22059	TRIPYKPNYSLNLWSIMK	407	1	0.960837	1.12097	1.2154	1.83126	3.35708	48.9672	0.9976	1.01717	4.69826
TSC2	Tuberin	P49815	LVLGRLPESLR	708	1	0.994969	1.12109	1.52241	1.52303	1.48791	0.134928	0.9976	0.997431	1.51124
SP3	Transcription factor Sp3	Q02447	VQVVDEEGDQQHQEGK	578	1	0.948273	0.667502	0.660777	0.666719	0.642396	0.021696	0.9976	0.656591	1
SRCIN1	SRC kinase signaling inhibitor 1	Q9C0H9	GQLQQLR	666	1	0.993509	0.99747	0.9941	1.0695	1.10143	8.16341	0.9975	0.996264	1.10143
UBA2	SUMO-activating enzyme subunit 2	Q9UBT2	IEQKEELDDVIALD	627	1	0.98114	0.969924	0.913195	0.846828	0.812883	1.7451	0.9975	0.796803	0.996111
GSN	Gelsolin	P06396	VVQGKEPAHLMSLFGGKPMIIYKGGTSR	526	1	0.992217	1.11961	1.47298	1.77762	1.96066	1.20711	0.9974	0.978309	1.99168
SDHA	Succinate dehydrogenase [ubiquinone] flavoprotein subunit	P31040	GEGGILINSQGER	313	1	1.00078	1.02796	1.33118	1.67714	1.6368	1.00411	0.9974	1.00924	1.65737
CCT4	T-complex protein 1 subunit delta	P50991	SIHDALCVIRCLVK	404	1	0.948049	0.963873	0.698126	0.327629	0.304896	1.24938	0.9974	0.304094	0.974707
PCM1	Pericentriolar material 1 protein	Q15154	INFSDLDQR	107	1	0.971965	0.960245	0.952289	0.93772	0.925892	1.44416	0.9974	0.895722	1.00001
DOHH	Deoxyhypusine hydroxylase	Q9BU89	EALLDESRPLFER	163	1	1.00761	0.993326	0.931015	0.831008	0.684424	22.4864	0.9974	0.545084	1.00768
HBS1L	HBS1-like protein	Q9Y450	LYSCLDHMR	81	1	1.00654	0.999878	0.885034	0.892483	0.887367	0.192501	0.9974	0.888288	1.00328
PGR	Progesterone receptor	P06401	APGASGCLLPR	482	1	1.0088	1.01402	1.01699	1.02105	1.02236	0.047692	0.9973	0.999952	1.02418
ECHS1	Enoyl-CoA hydratase	P30084	NNTVGLIQLNRPK	44	1	0.984034	0.999776	0.976599	0.9667	0.559748	24.4578	0.9973	0.555027	0.990113
APLP2	Amyloid beta precursor like protein 2	Q06481	ILQALRR	489	1	0.988498	0.909204	0.821253	0.669325	0.480412	23.8819	0.9973	0.183112	1.00687
PLEC	Plectin	Q15149	EQELQQTLQQEQSVLDQLRGEAEAAR	2199	1	0.983597	0.980485	0.895551	0.79661	0.785868	1.12118	0.9973	0.783757	0.992047
PSMD5	26S proteasome non-ATPase regulatory subunit 5	Q16401	EVARLEAPLEELR	11	1	1.02774	1.0175	1.00377	1.1001	1.48436	14.1276	0.9973	1.01225	1.48447
PRPF6	Pre-mRNA-processing factor 6	O94906	SVKLEWVQDNIR	681	1	0.998494	0.995527	0.984254	0.940085	0.941155	1.5735	0.9972	0.940369	0.998033
HADHA	Trifunctional enzyme subunit alpha	P40939	DTSASAVAVGLK	520	1	1.00172	0.979269	0.981118	0.934626	0.584919	60.9594	0.9972	0.366901	0.991747
EIF3E	Eukaryotic translation initiation factor 3 subunit E	P60228	MFEDPETTR	94	1	1.00066	0.988208	0.993335	1.05287	1.21269	13.6931	0.9972	0.995542	1.21303
ITSN1	Intersectin-1	Q15811	DQLDEVEKETR	584	1	1.05253	1.11732	1.18186	1.20815	1.23808	0.116595	0.9972	0.999163	1.24121
DOHH	Deoxyhypusine hydroxylase	Q9BU89	NAGGEEAALALAEGLHCGSALFR	184	1	0.985868	1.00672	0.948715	0.763634	0.647605	5.8323	0.9972	0.63173	0.998436
ENO1	Alpha-enolase	P06733	YISPDQLADLYK	270	1	1.01487	1.0471	1.11459	1.20954	1.23149	1.08254	0.9971	1.00346	1.2454
EPRS1	Bifunctional glutamate/proline--tRNA ligase	P07814	LNQWCNVVR	1144	1	0.990692	0.984339	1.00312	1.14205	1.20276	5.87211	0.9971	0.991716	1.20474
PPP1R8	Nuclear inhibitor of protein phosphatase 1	Q12972	VEGPGSLGLEESGSR	238	1	0.996147	1.00293	1.00635	1.07411	1.08195	3.23764	0.9971	0.999591	1.08188
ACOT1	Acyl-coenzyme A thioesterase 1	Q86TX2	GGELCLSMASFLK	234	1	0.996688	0.981876	1.01107	0.992659	0.576211	34.6507	0.9971	0.566954	0.99743
DNAAF5	Dynein axonemal assembly factor 5	Q86Y56	LLPALAAR	117	1	1.00462	1.00886	1.01348	1.06972	1.1176	8.47236	0.9971	1.00394	1.12474
RBM4B	RNA-binding protein 4B	Q9BQ04	HLLPNSGAAATSAAMAAAAATTSSYYGR	274	1	1.59475	1.70675	1.72858	1.75089	1.80531	0.000228	0.9971	0.999901	1.80818
NUP62	Nuclear pore glycoprotein p62	P37198	HFLQQATQVNAWDR	350	1	0.998109	0.950291	0.707744	0.496758	0.516405	0.748175	0.997	0.498637	0.996314
TRIM28	Transcription intermediary factor 1-beta	Q13263	MNEAFGDTKFSAVLVEPPPMSLPGAGLSSQELSGGPGDGP	796	1	0.75684	0.656196	0.669087	0.646695	0.650641	0.005918	0.997	0.654921	1.00008
EIF3A	Eukaryotic translation initiation factor 3 subunit A	Q14152	EQPEKEPELQQYVPQLQNNTILR	416	1	1.00164	1.01207	0.98831	0.883847	0.811298	7.16104	0.997	0.80454	1.00457
ACOT1	Acyl-coenzyme A thioesterase 1	Q86TX2	SFIPVER	307	1	0.996388	1.02474	0.986869	0.918325	0.500682	96.9648	0.997	0.012487	1.00477
TAF15	TATA-binding protein-associated factor 2N	Q92804	QSSYSQQPYNNQGQQQNMESSGSQGGR	75	1	1.00022	1.00476	0.999376	1.02241	1.08935	16.6386	0.997	1.00106	1.0908
UBAP1	Ubiquitin-associated protein 1	Q9NZ09	GGSGSVLQDEEVLASLER	203	1	0.9954	0.966664	0.830093	0.684307	0.690957	0.884529	0.997	0.680564	0.995194
HNRNPDL	Heterogeneous nuclear ribonucleoprotein D-like	O14979	YHQIGSGKCEIK	295	1	0.975247	0.948893	0.896737	0.830214	0.808738	0.969371	0.9969	0.788843	0.997224
NBN	Nibrin	O60934	LLPAAGPAGGEPYR	4	1	0.999112	0.997193	1.00595	1.02999	1.05616	9.56224	0.9969	0.998647	1.06166
RAB11FIP3	Rab11 family-interacting protein 3	O75154	EATQELIEDLRK	616	1	0.9955	0.961215	0.921162	0.893299	0.880434	0.350452	0.9969	0.878855	1.0023
HARS1	Histidine--tRNA ligase	P12081	AALEELVK	5	1	0.998788	1.00021	0.997431	1.02772	1.04492	8.05664	0.9969	0.999024	1.04506
GBP2	Guanylate-binding protein 2	P32456	YLESKEDVADALLQTDQSLSEKEK	462	1	0.995462	0.897693	0.85266	0.839881	0.838493	0.066673	0.9969	0.842509	1.00195
NUP214	Nuclear pore complex protein Nup214	P35658	QMASQAPAVNTLTESTLK	1100	1	1.02893	1.19466	1.19755	1.2137	1.21181	0.025423	0.9969	0.999963	1.20783
SERPINH1	Serpin H1	P50454	HLAGLGLTEAIDKNKADLSR	320	1	0.969299	0.980121	0.97761	0.78802	0.556606	11.2255	0.9969	0.548032	0.983209
KHDRBS1	KH domain-containing	Q07666	VLIPVKQYPK	160	1	0.993181	0.983447	0.920566	0.916498	0.919038	0.215962	0.9969	0.917645	0.996685
LRSAM1	E3 ubiquitin-protein ligase LRSAM1	Q6UWE0	FSREELEWQNR	242	1	0.998615	0.957858	0.932449	0.937421	0.933059	0.077653	0.9969	0.934256	0.999621
KCTD1	BTB/POZ domain-containing protein KCTD1	Q719H9	SRPLITR	2	1	1.00951	1.01588	1.02023	0.886216	0.707702	11.4311	0.9969	0.706769	1.01143
NTMT1	N-terminal Xaa-Pro-Lys N-methyltransferase 1	Q9BV86	IICSAGLSLLAEER	193	1	0.990182	0.960686	0.914227	0.82186	0.78264	2.20582	0.9969	0.760119	0.997704
RSAD1	Radical S-adenosyl methionine domain-containing protein 1	Q9HA92	EVQELLER	389	1	0.995136	1.06737	1.18033	1.19693	1.21137	0.175186	0.9969	0.994775	1.20472
SDR39U1	Epimerase family protein SDR39U1	Q9NRG7	WNETFQK	70	1	0.970297	1.00638	1.0151	0.848961	0.325907	13.4649	0.9969	0.325765	0.997947
HNRNPH1	Heterogeneous nuclear ribonucleoprotein H	P31943	RGAYGGGYGGYDDYNGYNDGYGFGSDRFGR	233	1	0.895999	0.866848	0.823677	0.808539	0.800482	0.013433	0.9968	0.787626	0.999804
PPP1R9B	Neurabin-2	Q96SB3	ERPGEQSEVAQLIQQTLEQER	583	1	0.993502	0.967274	0.91445	0.860754	0.857986	0.599706	0.9968	0.851693	0.999091
GCLC	Glutamate--cysteine ligase catalytic subunit	P48506	VVINVPIFK	201	1	0.990675	1.05378	1.22848	1.26184	1.24218	0.218971	0.9967	0.994546	1.2518
PRKDC	DNA-dependent protein kinase catalytic subunit	P78527	CGAALAGHQLIR	25	1	1.04542	1.02959	1.0451	1.23539	1.74088	13.3825	0.9967	1.02996	1.74229
SQSTM1	Sequestosome-1	Q13501	NYDIGAALDTIQYSKHPPPL	421	1	0.976918	0.892229	0.83955	0.815131	0.824804	0.067091	0.9967	0.820979	1.00104
ECI2	Enoyl-CoA delta isomerase 2	O75521	LHAVNAEECNVLQGR	360	1	1.00157	1.00215	0.99523	1.01723	1.10445	19.0908	0.9966	0.999736	1.10608
NUDCD3	NudC domain-containing protein 3	Q8IVD9	FDPAMFNISPGAVQF	347	1	1.0296	1.11087	1.10529	1.11382	1.11248	0.014913	0.9966	1.00003	1.11084
UBE4B	Ubiquitin conjugation factor E4 B	O95155	LLVPSLMK	965	1	1.01272	1.00275	1.07906	1.20942	1.33153	6.84457	0.9965	1.00024	1.37481
NEK7	Serine/threonine-protein kinase Nek7	Q8TDX7	DIKPANVFITATGVVK	161	1	0.986791	0.956278	0.928362	0.923896	0.915669	0.083958	0.9965	0.918079	1.00022
ARIH1	E3 ubiquitin-protein ligase ARIH1	Q9Y4X5	VQYPDAKPVR	287	1	0.977256	0.984699	1.11957	1.24069	1.24234	0.968614	0.9965	0.987067	1.24186
P4HB	Protein disulfide-isomerase	P07237	KSNFAEALAAHK	31	1	1.02854	0.971166	1.27102	1.63594	1.62427	1.07468	0.9964	0.999886	1.63015
COASY	Bifunctional coenzyme A synthase	Q13057	LKGLGAFVIDSDHLGHR	378	1	1.13185	1.21391	1.24967	1.25897	1.28291	0.011256	0.9964	0.999734	1.27635
GPI	Glucose-6-phosphate isomerase	P06744	MIPCDFLIPVQTQHPIRK	401	1	1.54487	1.07963	1.28713	1.26162	8.81323	31.0476	0.9963	1.2276	8.84329
PC	Pyruvate carboxylase	P11498	GANAVGYTNYPDNVVFK	645	1	0.931903	0.850697	0.764031	0.6751	0.667682	0.203123	0.9963	0.644266	0.998919
UQCRC1	Cytochrome b-c1 complex subunit 1	P31930	SGMFWLRF	473	1	0.892006	0.872611	1.06394	1.60767	2.94138	37.2242	0.9963	0.922648	3.79053
GOLGB1	Golgin subfamily B member 1	Q14789	IAELEEELVCVQK	2655	1	0.988121	0.974756	0.94231	0.917353	0.884366	4.21917	0.9963	0.851925	1.00065
SGK3	Serine/threonine-protein kinase Sgk3	Q96BR1	AGLNEFIQNLVR	92	1	1.00186	0.996667	0.955958	0.925957	0.931206	0.743969	0.9963	0.928204	1.0004
OSBPL9	Oxysterol-binding protein-related protein 9	Q96SU4	TGYSANIIFHTKPFYGGKK	584	1	1.25632	1.32136	1.45496	1.53109	1.58035	0.089543	0.9963	1.00079	1.678
SEPHS2	Selenide	Q99611	VIEVLPR	422	1	0.977992	0.976126	0.989534	0.856739	0.638694	11.609	0.9963	0.638517	0.985925
TAF6L	TAF6-like RNA polymerase II p300/CBP-associated factor-associated factor 65 kDa subunit 6L	Q9Y6J9	RWALSDYSLYLPL	610	1	0.871157	0.67379	0.524239	0.508369	0.457052	0.050087	0.9963	0.471647	1.00058
THBS1	Thrombospondin-1	P07996	QVTQSYWDTNPTR	1042	1	1.04276	1.16118	1.34605	1.456	1.43605	0.217058	0.9962	1.0034	1.45485
ATP5F1A	ATP synthase subunit alpha	P25705	RSTVAQLVK	253	1	0.95775	0.915659	0.900557	0.885761	0.888791	0.021142	0.9962	0.887315	1.00016
OGDH	2-oxoglutarate dehydrogenase complex component E1	Q02218	SWDIFFR	75	1	0.999332	0.964633	0.918892	0.887428	0.886984	0.294472	0.9962	0.884191	1.00238
PSMD5	26S proteasome non-ATPase regulatory subunit 5	Q16401	ALHSVLQAVPLNELR	24	1	0.977418	0.987901	1.0085	1.06821	1.42269	16.2141	0.9962	0.993438	1.4239
TFIP11	Tuftelin-interacting protein 11	Q9UBB9	EWDPLKDCTYGTEIISK	438	1	0.995128	0.944187	0.883403	0.790708	0.756029	1.21524	0.9962	0.735993	1.00236
RNF40	E3 ubiquitin-protein ligase BRE1B	O75150	SQVDAQLLTVQK	819	1	1.00473	1.02526	1.05079	1.05754	1.05304	0.118348	0.9961	1.00054	1.05554
NEDD4	E3 ubiquitin-protein ligase NEDD4	P46934	TYYVNHESR	626	1	0.809386	0.607207	0.63366	0.607954	0.607876	0.01006	0.9961	0.614166	1.00001
HUWE1	E3 ubiquitin-protein ligase HUWE1	Q7Z6Z7	SHHAASTTTAPTPAAR	1084	1	1.09372	1.10921	1.13653	1.16367	1.18871	0.135081	0.9961	0.999528	1.23627
RBM19	Probable RNA-binding protein 19	Q9Y4C8	NLPAGTLAAQLQETFGHFGSLGR	593	1	1.05921	1.09933	1.33062	1.51077	1.61558	1.09579	0.9961	1.00854	1.6439
CLTC	Clathrin heavy chain 1	Q00610	EHLELFWSR	1334	1	0.995944	0.972927	1.00123	0.987294	1.39816	43.343	0.996	0.991475	1.39969
ANKHD1	Ankyrin repeat and KH domain-containing protein 1	Q8IWZ3	RLTSSVSCALDEAAAALTR	174	1	0.703881	0.586486	0.548482	0.535128	0.493892	0.00388	0.996	0.504911	1.00025
LARS1	Leucine--tRNA ligase	Q9P2J5	FSEAEHWLDYFPPLAIQDLKR	174	1	1.17286	1.19024	1.2175	1.21789	1.24683	0.002536	0.996	0.99993	1.32294
FH	Fumarate hydratase	P07954	THTQDAVPLTLGQEFSGYVQQVK	234	1	0.804854	0.759273	0.768121	0.758471	0.759047	0.000753	0.9959	0.758583	1.00044
COMT	Catechol O-methyltransferase	P21964	DRYLPDTLLLEECGLLRK	195	1	0.997825	0.995772	0.964752	0.932215	0.909412	2.52041	0.9959	0.903513	1.00096
HADHA	Trifunctional enzyme subunit alpha	P40939	DATLTALDRGQQQVFK	391	1	0.976959	1.00107	0.96385	0.893843	0.572747	102.659	0.9959	0.146146	0.990583
PPP1R10	Serine/threonine-protein phosphatase 1 regulatory subunit 10	Q96QC0	STGLELETPSLVPVKK	210	1	0.993419	1.00118	0.9889	0.93288	0.897438	6.57549	0.9959	0.894148	0.998267
OGFR	Opioid growth factor receptor	Q9NZT2	SLGELGLEHFQAPLVR	219	1	0.999097	0.965001	0.931772	0.928097	0.921669	0.111847	0.9959	0.925075	1.0015
OSBPL2	Oxysterol-binding protein-related protein 2	Q9H1P3	ITEYMEHVYLIHR	107	1	1.12808	1.29786	1.30841	2.21357	4.39755	50.1801	0.9958	1.11862	6.27153
ZC3H4	Zinc finger CCCH domain-containing protein 4	Q9UPT8	TVNATGSSAAPGSSDKPSDPR	1052	1	0.994751	1.06039	1.11436	1.11271	1.12248	0.094797	0.9958	0.996891	1.11682
SART1	U4/U6	O43290	KKPDYLPYAEDESVDDLAQQKPR	309	1	1.00308	1.00269	0.944813	0.904816	0.913732	0.890144	0.9957	0.909272	1.00193
AHNAK	Neuroblast differentiation-associated protein AHNAK	Q09666	GPGVDVNLK	5435	1	0.987175	0.999067	0.972623	0.859857	0.851407	2.36738	0.9957	0.851439	0.995484
FAM83H	Protein FAM83H	Q6ZRV2	AGFADPDDFTLGAGPR	481	1	0.998578	0.987564	0.970726	0.938454	0.868109	52.6695	0.9957	0.777687	0.99865
MTOR	Serine/threonine-protein kinase mTOR	P42345	LLVVGITDPDPDIR	659	1	0.990411	0.96218	0.930605	0.884869	0.873124	0.753838	0.9956	0.862494	1.00016
EP300	Histone acetyltransferase p300	Q09472	LQQAQMLR	1822	1	0.984661	1.01249	1.11795	1.14703	1.15005	0.382328	0.9956	0.992268	1.14918
BCL9L	B-cell CLL/lymphoma 9-like protein	Q86UU0	YAMPSSTPLYHNAIK	1094	1	1.02896	1.08694	1.11602	1.13681	1.14194	0.059415	0.9956	0.998879	1.14073
CNOT1	CCR4-NOT transcription complex subunit 1	A5YKK6	ILLVDER	1768	1	0.985396	0.975547	0.961456	0.933653	0.915925	4.38597	0.9955	0.888209	0.999108
PPP1R37	Protein phosphatase 1 regulatory subunit 37	O75864	TCEALEEVFKR	123	1	0.99001	0.998718	1.08099	1.10261	1.09725	0.490545	0.9955	0.995074	1.1
CKAP5	Cytoskeleton-associated protein 5	Q14008	LLPDTINSINLDR	1719	1	1.01985	1.01925	1.02	0.953299	0.727996	19.0821	0.9955	0.718809	1.01483
PMVK	Phosphomevalonate kinase	Q15126	KIVEGISQPIWLVSDTR	94	1	0.991989	0.98638	0.961176	0.94238	0.926682	1.39964	0.9955	0.919814	0.999557
CDPF1	Cysteine-rich DPF motif domain-containing protein 1	Q6NVV7	FLVLGSCCSLCSR	57	1	1.0469	1.19619	1.26059	1.24258	1.24506	0.033641	0.9955	1.00056	1.25001
INTS1	Integrator complex subunit 1	Q8N201	SGEQCSVEPDLISK	1530	1	1.00141	1.00656	1.04103	1.08796	1.08286	1.0735	0.9955	1.00232	1.08592
VPS50	Syndetin	Q96JG6	LLAAIDDIDRPKR	952	1	1.00126	1.01182	0.902748	0.823301	0.836359	0.931667	0.9955	0.829829	1.00436
P4HB	Protein disulfide-isomerase	P07237	MDSTANEVEAVK	425	1	0.999799	1.07574	1.2406	1.40636	1.59554	4.61667	0.9954	0.985634	1.72078
POLR2I	DNA-directed RNA polymerase II subunit RPB9	P36954	ILLYACR	34	1	0.991327	0.995603	0.993249	1.05333	1.09379	9.00856	0.9954	0.995033	1.09381
RPS7	Small ribosomal subunit protein eS7	P62081	ELNITAAKEIEVGGGR	42	1	0.881076	0.834621	0.792045	0.755247	0.685342	3.83693	0.9954	0.525747	1.00006
C12orf57	Protein C10	Q99622	ASASTQPAALSAEQAK	2	1	0.997776	0.998183	0.998632	0.978049	0.97599	4.45365	0.9954	0.976014	0.998723
PRRC2C	Protein PRRC2C	Q9Y520	IACGPPQAK	221	1	0.990682	0.847576	0.847663	0.832991	0.83251	0.032097	0.9954	0.837672	1.00002
DSTN	Destrin	P60981	AVIFCLSADKK	35	1	1.00192	1.01155	1.04885	1.11691	1.1954	5.87382	0.9953	0.998747	1.21558
PSTPIP2	Proline-serine-threonine phosphatase-interacting protein 2	Q9H939	KKPCGQSEINTLKR	62	1	1.00172	1.16894	1.20761	1.18713	1.20233	0.048588	0.9953	0.998665	1.19906
AKAP8	A-kinase anchor protein 8	O43823	NGSFGGQYSECRDPAR	163	1	0.963266	0.950231	0.899238	0.859151	0.818957	3.20612	0.9952	0.762042	0.998976
AHNAK	Neuroblast differentiation-associated protein AHNAK	Q09666	VDIKAPDVEGQGLDWSLK	1108	1	0.998282	1.00408	0.964313	0.909914	0.894722	1.81177	0.9952	0.895024	1.00171
STAG1	Cohesin subunit SA-1	Q8WVM7	LTEHFIITLPMLLSK	567	1	1.02459	0.960634	1.09412	1.53838	1.71444	4.36053	0.9952	0.994582	1.72607
MED17	Mediator of RNA polymerase II transcription subunit 17	Q9NVC6	SALTEMCVLYDVLSIVR	104	1	0.955992	1.05524	1.18731	1.57805	1.74893	3.22789	0.9952	0.987295	1.78913
OSBP	Oxysterol-binding protein 1	P22059	LWIDQSGEIDIVNHK	590	1	0.972515	1.11434	1.11255	1.70514	2.58902	17.8588	0.9951	1.01841	2.89319
HNRNPH2	Heterogeneous nuclear ribonucleoprotein H2	P55795	FFSDCKIQNGTSGIR	30	1	1.02403	1.00493	0.890571	0.739362	0.672537	2.07761	0.9951	0.665532	1.01632
UBR4	E3 ubiquitin-protein ligase UBR4	Q5T4S7	KLLEEQGIFLR	3242	1	1.05064	1.3338	1.53451	1.65361	1.6447	0.10388	0.9951	0.988641	1.64927
UBN1	Ubinuclein-1	Q9NPG3	YGGFYINSGTLQFR	157	1	0.996806	0.786545	0.633981	0.644244	0.670745	0.089775	0.9951	0.64965	0.99843
P4HB	Protein disulfide-isomerase	P07237	VHSFPTLK	437	1	0.963895	0.99078	1.09186	1.29189	1.38776	3.17191	0.995	0.97946	1.40341
NFKB1	Nuclear factor NF-kappa-B p105 subunit	P19838	MLLAVQR	527	1	0.958589	0.944978	0.91326	0.887484	0.848655	5.1029	0.995	0.783966	0.999379
MYH9	Myosin-9	P35579	KQELEEICHDLEAR	910	1	1.00337	1.03525	1.05713	1.06721	1.06844	0.098737	0.995	0.998412	1.06747
PPIG	Peptidyl-prolyl cis-trans isomerase G	Q13427	VVFELFSDVCPK	24	1	1.02491	1.04864	1.1179	1.18371	1.19215	0.586587	0.995	1.00512	1.20219
ATL3	Atlastin-3	Q6DD88	GLLEYFK	320	1	1.03402	0.986112	1.00845	1.12282	1.55509	14.2535	0.995	1.00714	1.55548
VPS35	Vacuolar protein sorting-associated protein 35	Q96QK1	ILVGTNLVR	218	1	0.998405	1.0406	1.01731	1.14387	1.55071	13.2476	0.995	1.01409	1.55088
SMARCAD1	SWI/SNF-related matrix-associated actin-dependent regulator of chromatin subfamily A containing DEAD/H box 1	Q9H4L7	LKLNYAIFDEGHMLK	620	1	1.01186	1.32413	1.68605	1.69069	1.6257	0.102714	0.9949	1.00535	1.66787
ISY1	Pre-mRNA-splicing factor ISY1 homolog	Q9ULR0	IRDLNDEINKLLR	70	1	0.975821	0.95669	0.919726	0.894977	0.892284	0.212665	0.9949	0.885268	0.998607
PDS5A	Sister chromatid cohesion protein PDS5 homolog A	Q29RF7	SQLELLISPTCSCK	571	1	1.01985	1.00462	1.01764	0.985959	1.4256	61.9455	0.9948	1.00558	1.47596
SYAP1	Synapse-associated protein 1	Q96A49	SVEEGKIDGIIDKTIIGDFQK	86	1	0.902499	0.674607	0.620669	0.61621	0.649683	0.022071	0.9948	0.628394	0.999824
PIK3R4	Phosphoinositide 3-kinase regulatory subunit 4	Q99570	KLVLLSVLKEPVSR	713	1	1.07566	1.19582	1.23175	1.2661	1.25696	0.027725	0.9948	0.999175	1.25816
DIDO1	Death-inducer obliterator 1	Q9BTC0	IFQPVIEAPGASK	384	1	1.00354	0.990885	0.980505	0.951758	0.907423	35.5035	0.9948	0.852882	1.00142
ETV6	Transcription factor ETV6	P41212	TPRPSVDNVHHNPPTIELLHR	161	1	0.999449	1.00816	0.989524	0.932429	0.88996	7.09874	0.9947	0.884255	1.00254
YWHAE	14-3-3 protein epsilon	P62258	YLAEFATGNDRK	131	1	0.983053	0.989575	1.00845	1.08388	1.29218	12.9428	0.9947	0.995248	1.29251
PRKDC	DNA-dependent protein kinase catalytic subunit	P78527	SRSQGCSEQVLTVLK	3288	1	1.00437	1.06111	1.09661	1.32686	1.53936	9.76104	0.9947	1.00959	1.63588
SFSWAP	Splicing factor	Q12872	YTVLAENKSDEK	265	1	0.920381	0.904446	0.85527	0.826485	0.796326	0.851882	0.9947	0.725911	0.999707
PTGR1	Prostaglandin reductase 1	Q14914	MEAFVVYR	267	1	0.947226	1.00568	0.98688	0.793395	0.289802	13.4026	0.9947	0.288896	0.984978
ACOT1	Acyl-coenzyme A thioesterase 1	Q86TX2	GLAPEQPVTLR	25	1	0.989856	0.972028	1.00796	0.912694	0.581811	14.3625	0.9947	0.581609	0.992462
RBM33	RNA-binding protein 33	Q96EV2	LSGGGGESDGFFHPEGQPQR	990	1	1.09443	1.28077	1.3053	1.34136	1.32796	0.02185	0.9947	0.999596	1.3273
GEMIN7	Gem-associated protein 7	Q9H840	GFAPDGR	24	1	1.01889	0.996579	1.00374	0.797589	0.802398	2.24665	0.9947	0.799982	1.00517
CNOT2	CCR4-NOT transcription complex subunit 2	Q9NZN8	EGSGNPTPLINPLAGR	240	1	0.986652	0.950023	0.929047	0.912827	0.912941	0.07998	0.9947	0.912305	1.00094
KDM3A	Lysine-specific demethylase 3A	Q9Y4C1	FLGDQQR	133	1	1.23109	1.36388	1.45123	1.57855	1.58524	0.051148	0.9947	1.00029	1.63941
NHERF1	Na(+)/H(+) exchange regulatory cofactor NHE-RF1	O14745	RAPQMDWSK	342	1	0.983883	0.966951	0.940259	0.663406	0.679027	1.4467	0.9946	0.671206	0.983612
OSBP	Oxysterol-binding protein 1	P22059	IPYKPNYSLNLWSIMK	409	1	0.891439	0.851697	0.863228	1.29539	2.68186	13.1723	0.9946	0.901589	2.68203
ERP29	Endoplasmic reticulum resident protein 29	P30040	DGDFENPVPYTGAVK	123	1	0.993727	1.00301	0.983436	0.985811	1.24826	68.1256	0.9946	0.993195	1.2819
RBM5	RNA-binding protein 5	P52756	HIAMHYSNPRPK	170	1	1.06873	1.23367	1.24395	1.26353	1.27134	0.021198	0.9946	0.999777	1.26059
YARS1	Tyrosine--tRNA ligase	P54577	NLQEVLGEEKLK	17	1	1.02746	1.00856	0.978265	0.913703	0.614013	107.898	0.9946	0.194257	1.00962
PRKDC	DNA-dependent protein kinase catalytic subunit	P78527	SIELFYK	1187	1	0.999268	1.0436	1.0062	1.20349	1.5625	12.5511	0.9946	1.01216	1.56419
PYCR3	Pyrroline-5-carboxylate reductase 3	Q53H96	AGKVEAQHILASAPTDR	30	1	1.00557	1.01071	1.02901	1.09214	1.09558	1.78585	0.9946	1.0051	1.09604
TNKS1BP1	182 kDa tankyrase-1-binding protein	Q9C0C2	DFCIEASER	1112	1	0.998818	1.0028	1.00177	0.997613	0.954431	34.454	0.9946	0.949874	1.00085
VPS51	Vacuolar protein sorting-associated protein 51 homolog	Q9UID3	RECPLAQLMDSETDMVR	79	1	0.901367	0.993138	0.961919	1.51666	2.1018	10.1494	0.9946	0.964071	2.10196
CASC3	Protein CASC3	O15234	SGETVKHEISYR	339	1	1.09183	1.09967	1.10751	1.11885	1.11185	0.000122	0.9945	1.00003	1.11827
RAP1GAP	Rap1 GTPase-activating protein 1	P47736	AAGISLIVPGKSPTR	473	1	1.0105	0.83728	0.805714	0.786927	0.805635	0.073996	0.9945	0.799426	1.00526
PDCD10	Programmed cell death protein 10	Q9BUL8	LIHQTNLILQTFK	197	1	0.989957	0.986584	1.01063	1.07038	1.19386	18.1552	0.9945	0.993468	1.22532
NDEL1	Nuclear distribution protein nudE-like 1	Q9GZM8	ATIVSLEDFEQR	131	1	1.01384	0.861593	0.796104	0.814049	0.809267	0.080045	0.9945	0.806468	1.00693
SBNO2	Protein strawberry notch homolog 2	Q9Y2G9	ELPVNTLDELIDQLGGPQR	728	1	0.911922	0.704157	0.624662	0.606586	0.570264	0.037724	0.9945	0.591528	1.00188
LAD1	Ladinin-1	O00515	ATASEQPLAQEPPASGGSPATTK	284	1	0.913619	1.00456	1.47789	1.70339	1.71119	0.597294	0.9944	0.957531	1.71196
MDH2	Malate dehydrogenase	P40926	IFGVTTLDIVR	166	1	1.01386	1.07174	1.32444	1.43278	1.3923	0.362188	0.9944	1.00542	1.4141
CRNKL1	Crooked neck-like protein 1	Q9BZJ0	VWISFAQFELSSGK	711	1	0.985352	1.00801	0.977795	0.919333	0.717343	66.4456	0.9944	0.520453	0.996867
VPS37C	Vacuolar protein sorting-associated protein 37C	A5D8V6	SNLSDRYQELR	65	1	1.00245	1.10923	1.10948	1.11817	1.12342	0.037999	0.9943	0.999681	1.11708
KDM1A	Lysine-specific histone demethylase 1A	O60341	CPLYEANGQAVPK	360	1	0.997308	0.96398	0.968464	0.992841	1.45741	30.7531	0.9943	0.98244	1.46604
USP10	Ubiquitin carboxyl-terminal hydrolase 10	Q14694	TAGQPEGGPGADFGQSCFPAEAGRDTLSR	238	1	1.00398	0.998255	0.901893	0.845407	0.862128	0.758316	0.9943	0.853714	1.001
UBAP2	Ubiquitin-associated protein 2	Q5T6F2	AAPLVTSGK	784	1	0.924888	0.836687	0.811841	0.782911	0.791562	0.021382	0.9943	0.789309	1.00041
ARFGEF3	Brefeldin A-inhibited guanine nucleotide-exchange protein 3	Q5TH69	IAEVCIETYISSCHQR	138	1	0.980507	1.05234	1.2275	1.21193	1.23144	0.134121	0.9943	0.990233	1.22369
MBNL2	Muscleblind-like protein 2	Q5VZF2	VIACFDSLKGR	50	1	1.05311	1.20432	1.26337	1.28223	1.25414	0.035336	0.9943	1.00023	1.26868
ACSS2	Acetyl-coenzyme A synthetase	Q9NR19	QPWPGIMR	520	1	1.06823	1.11372	1.46425	1.56869	1.57245	0.353585	0.9943	1.02957	1.57481
EIF4ENIF1	Eukaryotic translation initiation factor 4E transporter	Q9NRA8	ASGTLPSQPK	493	1	0.883242	0.836074	0.841388	0.831203	0.825215	0.004734	0.9943	0.831982	1.00001
ACTN4	Alpha-actinin-4	O43707	ICDQWDALGSLTHSRR	498	1	0.973832	1.22336	1.20663	1.63026	4.14982	65.2324	0.9942	1.08306	6.06678
ECHS1	Enoyl-CoA hydratase	P30084	KLFYSTFATDDRK	261	1	1.00945	1.03086	0.966828	0.88618	0.507538	119.273	0.9942	-0.06968	1.00962
TMSB10	Thymosin beta-10	P63313	NTLPTKETIEQEK	27	1	1.00564	0.986821	0.955982	0.921674	0.900863	1.5352	0.9942	0.895203	1.00388
EEF1A1	Elongation factor 1-alpha 1	P68104	EKTHINIVVIGHVDSGK	4	1	0.972931	1.35271	1.47738	1.53061	1.51908	0.078632	0.9942	0.986301	1.50906
CSTF1	Cleavage stimulation factor subunit 1	Q05048	DRQQLYK	10	1	0.770253	1.20202	0.968032	1.887	5.4823	16.8756	0.9942	0.984256	5.52206
MCM6	DNA replication licensing factor MCM6	Q14566	VYSLDDIRR	566	1	1.02147	1.01375	0.979948	0.938917	0.621627	105.807	0.9942	0.215256	1.00712
OTUD6B	Deubiquitinase OTUD6B	Q8N6M0	HAYGLGEHYNSVTR	270	1	1.04666	1.29043	1.39952	1.43735	1.39236	0.050667	0.9942	0.999726	1.41317
KIFAP3	Kinesin-associated protein 3	Q92845	WHNSQWLEMVESR	678	1	1.03764	1.01391	1.02615	1.23555	1.38423	8.18498	0.9942	1.0172	1.38863
EME1	Crossover junction endonuclease EME1	Q96AY2	SVLDHQNNEGASCDWK	121	1	1.37878	1.38925	1.43596	1.49164	1.48505	0.000265	0.9942	1.00005	1.61917
MDN1	Midasin	Q9NU22	CCFEVLTSSWR	3069	1	0.791343	1.14408	1.46123	2.81177	3.84091	6.817	0.9942	0.930298	4.17328
RPL3	Large ribosomal subunit protein uL3	P39023	ERLEQQVPVNQVFGQDEMIDVIGVTK	199	1	0.988901	0.993188	0.951177	0.898406	0.878797	1.81331	0.9941	0.876696	0.996554
RBM39	RNA-binding protein 39	Q14498	AAAMANNLQK	235	1	0.922426	0.903873	0.896621	0.891273	0.87363	0.033129	0.9941	0.827858	1.00004
PPP2R5D	Serine/threonine-protein phosphatase 2A 56 kDa regulatory subunit delta isoform	Q14738	AEEFLTASQEAL	591	1	0.998749	0.934131	0.86973	0.776971	0.74018	1.00923	0.9941	0.720526	1.00497
CENPU	Centromere protein U	Q71F23	ELNIVLPEFEK	250	1	0.988205	0.959681	0.908067	0.890132	0.869474	0.308698	0.9941	0.870529	1.0007
OSBPL11	Oxysterol-binding protein-related protein 11	Q9BXB4	SVILHLLSQLK	368	1	1.06066	1.02743	1.08787	1.26148	2.00205	14.7318	0.9941	1.04391	2.00425
FARSA	Phenylalanine--tRNA ligase alpha subunit	Q9Y285	YFSIDRVFR	350	1	1.0043	1.03022	0.920622	0.731633	0.449812	17.8964	0.9941	0.290287	1.01389
MYO1C	Unconventional myosin-Ic	O00159	KRPETVATQFK	595	1	0.982618	0.997814	1.17263	1.18996	1.17206	0.331335	0.994	0.991275	1.18104
PLRG1	Pleiotropic regulator 1	O43660	QYPANQGQEVEYFVAGTHPYPPGPGVALTADTK	81	1	1.00485	0.971347	0.924009	0.888785	0.887659	0.382172	0.994	0.884875	1.00385
P4HB	Protein disulfide-isomerase	P07237	NFEDVAFDEKK	376	1	1.02689	0.989734	1.13982	1.41085	1.38388	1.20357	0.994	1.00552	1.39745
ACAT1	Acetyl-CoA acetyltransferase	P24752	LNVTPLAR	304	1	1.03524	1.14496	1.16412	1.18082	1.16373	0.027297	0.994	0.999885	1.17021
HDHD3	Haloacid dehalogenase-like hydrolase domain-containing protein 3	Q9BSH5	AHGLEVEPSALEQGFR	35	1	1.01931	0.973891	0.961124	1.07427	1.64206	22.1199	0.994	0.988508	1.65905
DDX23	Probable ATP-dependent RNA helicase DDX23	Q9BUQ8	GFIAGIDLK	302	1	1.00093	0.887772	0.841288	0.834552	0.853289	0.078261	0.994	0.84304	1.0005
EPPK1	Epiplakin	P58107	YLEGTSCIAGVLVPAKDQPGRQEK	22	1	1.0065	1.00612	1.002	0.946423	0.946	2.75409	0.9939	0.945646	1.0043
TLE1	Transducin-like enhancer protein 1	Q04724	DREPGTSNSLLVPDSLR	193	1	1.00047	1.01682	0.949447	0.845259	0.840548	1.1975	0.9939	0.842858	1.00577
DECR1	2	Q16698	VTKEQWDTIEELIR	317	1	1.03417	1.05996	0.948418	0.685899	0.302168	16.0419	0.9939	0.156491	1.03153
ARK2N	Protein ARK2N	Q96B23	HGSGTQYVSTR	359	1	0.998644	0.94721	0.945101	0.939808	0.946406	0.037159	0.9939	0.943753	1.00007
HPS5	BLOC-2 complex member HPS5	Q9UPZ3	ESLDDLFQICSPCAIASGLR	715	1	0.967696	0.894849	0.794373	0.701269	0.709128	0.290745	0.9939	0.692487	0.998065
SULT2B1	Sulfotransferase 2B1	O00204	ICGFLGRPLGK	224	1	1.00355	0.977676	1.00835	0.982659	0.667636	27.3291	0.9938	0.661467	0.997392
PRKDC	DNA-dependent protein kinase catalytic subunit	P78527	LAAVVSACK	1448	1	1.00743	1.01195	1.05075	1.16397	1.57172	12.9055	0.9938	1.01753	1.57187
CDC37	Hsp90 co-chaperone Cdc37	Q16543	QYMEGFNDELEAFKER	247	1	0.960825	1.05101	1.16406	1.37618	1.61581	10.7068	0.9938	0.978257	1.80303
KRT14	Keratin	P02533	VTMQNLNDRLASYLDKVR	117	1	0.97345	0.901253	0.880934	0.862881	0.867227	0.03672	0.9937	0.86793	1.0007
ACSF3	Malonate--CoA ligase ACSF3	Q4G176	EYWNKPEETK	435	1	1.02329	1.05635	1.02172	1.31818	1.55993	9.39061	0.9937	1.02519	1.56039
HDAC6	Histone deacetylase 6	Q9UBN7	MGDADYLAAWHR	710	1	1.07326	1.00365	1.00431	1.0177	0.176967	25.1911	0.9937	0.17672	1.02051
AAR2	Protein AAR2 homolog	Q9Y312	AAVQMDPELAK	2	1	1.0279	1.04834	0.999107	0.71977	0.579824	6.21689	0.9937	0.574084	1.0252
RANBP2	E3 SUMO-protein ligase RanBP2	P49792	SISSPSVSSETMDKPVDLSTR	2802	1	0.925543	0.903317	0.890909	0.853566	0.836462	1.25792	0.9936	0.759595	0.999938
SP3	Transcription factor Sp3	Q02447	IKEEEPDPEEWQLSGDSTLNTNDLTHLR	550	1	0.968127	0.982636	0.926062	0.81752	0.675612	20.2994	0.9936	0.553535	0.990535
TRMT5	tRNA (guanine(37)-N1)-methyltransferase	Q32P41	TVNIPVLK	93	1	0.980692	0.991384	0.849399	0.848868	0.844489	0.445997	0.9936	0.846684	0.990725
JMJD6	Bifunctional arginine demethylase and lysyl-hydroxylase JMJD6	Q6NYC1	DEGGNQQDEAITWFNVIYPR	223	1	0.999271	0.981798	0.998524	0.90396	0.789919	10.6594	0.9936	0.789827	0.9949
SAMD1	Sterile alpha motif domain-containing protein 1	Q6SPF0	YLGGSGGAGGR	257	1	0.991171	1.00314	0.921234	0.898652	0.894234	0.779482	0.9936	0.896441	0.998108
CDAN1	Codanin-1	Q8IWY9	TGSLTDEPADPAR	283	1	1.01574	0.98912	1.10952	1.26473	1.24826	1.09899	0.9936	1.0016	1.25663
ITCH	E3 ubiquitin-protein ligase Itchy homolog	Q96J02	LPVGGFADLMGSNGPQKFCIEK	837	1	1.18561	1.32778	1.58839	1.7111	1.92155	0.992492	0.9936	0.997077	2.09677
NCAPG	Condensin complex subunit 3	Q9BPX3	LLSDFLDSEVSELR	695	1	0.923794	0.818868	0.821151	0.830925	0.81158	0.010869	0.9936	0.820617	1
HSP90AB1	Heat shock protein HSP 90-beta	P08238	TLTLVDTGIGMTK	83	1	1.0835	1.00272	1.07691	1.38902	1.97076	19.2892	0.9935	1.02905	2.12773
HYCC2	Hyccin 2	Q8IXS8	ETFTAQNR	170	1	0.818165	0.789436	0.764363	0.776429	0.752025	0.000437	0.9935	0.755539	1.00001
TP53I11	Tumor protein p53-inducible protein 11	O14683	AAKQPPPLMK	2	1	0.926878	0.77018	0.771897	0.775915	0.750984	0.014559	0.9934	0.766223	0.999999
RANBP2	E3 SUMO-protein ligase RanBP2	P49792	SGQSALYDALFSSQSPK	380	1	1.00342	1.0191	1.00547	0.988037	0.80962	19.3805	0.9934	0.808867	1.007
IDH3A	Isocitrate dehydrogenase [NAD] subunit alpha	P50213	TPYTDVNIVTIR	135	1	0.994503	1.00756	1.02653	1.06174	1.09258	3.80328	0.9934	0.996905	1.10057
CIAPIN1	Anamorsin	Q6FI81	SACGNCYLGDAFRCASCPYLGMPAFKPGEK	272	1	0.998329	0.98648	0.989531	0.928006	0.860362	11.063	0.9934	0.851624	0.995411
LONP1	Lon protease homolog	P36776	EFELSKLQQR	369	1	0.95052	0.87045	0.82636	0.832169	0.839517	0.025122	0.9933	0.831954	0.999958
YARS1	Tyrosine--tRNA ligase	P54577	NLQEVLGEEK	17	1	1.00485	0.982146	1.00952	1.00527	0.71219	49.1945	0.9933	0.69772	1.00043
ALDH18A1	Delta-1-pyrroline-5-carboxylate synthase	P54886	MLATLEPEQR	376	1	0.943139	0.888475	0.882675	0.867162	0.871671	0.012697	0.9933	0.872036	1.00012
MCM6	DNA replication licensing factor MCM6	Q14566	RYLLFAR	574	1	0.95903	1.00286	1.01422	0.780992	0.43365	11.1752	0.9933	0.433613	0.994031
SNAPC4	snRNA-activating protein complex subunit 4	Q5SXM2	WNLKEEEQLIELIEK	456	1	0.856747	0.494852	0.454552	0.382353	0.413832	0.024365	0.9933	0.413501	1.00082
IPO4	Importin-4	Q8TEX9	ETEHCVSLSLAQLSATIFR	91	1	1.02277	1.03281	1.01463	0.947802	0.690668	18.3626	0.9933	0.682712	1.0177
HNRNPLL	Heterogeneous nuclear ribonucleoprotein L-like	Q8WVV9	NDNDSWDYTKPYLGR	252	1	1.06017	1.25354	1.39484	1.68244	1.83109	1.73168	0.9933	0.994191	1.97718
DDX1	ATP-dependent RNA helicase DDX1	Q92499	LQVIVCSATLHSFDVKK	401	1	0.974136	1.03986	1.01499	1.07337	1.65344	18.6533	0.9933	1.00724	1.65529
KDM6A	Lysine-specific demethylase 6A	O15550	TQLLQPADENWDPTGTK	1002	1	0.992128	0.992409	0.965228	0.996371	0.622464	43.2067	0.9932	0.621052	0.989231
GOLGB1	Golgin subfamily B member 1	Q14789	ILELEEENDRLR	1689	1	1.00011	0.975604	0.933419	0.913576	0.921606	0.228199	0.9932	0.917367	1.00124
MISP	Mitotic interactor and substrate of PLK1	Q8IVT2	GTPAGTTPGASQAPK	218	1	0.945708	0.939577	0.937857	0.926669	0.917643	0.17936	0.9932	0.877089	1.00004
TBRG4	FAST kinase domain-containing protein 4	Q969Z0	AQDITLPHLCSVLLAFAR	361	1	1.01201	1.00593	1.0131	1.10066	1.1123	2.89331	0.9932	1.00545	1.1097
DDX23	Probable ATP-dependent RNA helicase DDX23	Q9BUQ8	AQPLSLEELLAKK	139	1	0.979559	0.952391	0.905405	0.899408	0.891205	0.119309	0.9932	0.891487	0.998319
EML4	Echinoderm microtubule-associated protein-like 4	Q9HC35	VIAVADDFCK	803	1	1.12419	1.14919	1.33473	1.88498	2.19881	4.44136	0.9932	1.06225	2.30331
MDN1	Midasin	Q9NU22	ELQYLQGHLVSSDLSPR	250	1	1.02114	1.03916	1.09488	1.11702	1.1245	0.271866	0.9932	1.00346	1.1269
CNOT1	CCR4-NOT transcription complex subunit 1	A5YKK6	EVTYELDHPGFQIR	356	1	1.02159	0.98323	1.13931	1.31313	1.32779	1.10597	0.9931	1.00151	1.32086
TOMM34	Mitochondrial import receptor subunit TOM34	Q15785	DCTSALALVPFSIKPLLR	73	1	1.06877	1.0501	1.11716	1.48851	1.6301	4.23936	0.9931	1.03724	1.63987
MYH14	Myosin-14	Q7Z406	LMATLSNTNPSFVR	681	1	0.998402	1.03196	1.10402	1.15485	1.20235	1.24225	0.9931	0.994011	1.21279
AAR2	Protein AAR2 homolog	Q9Y312	AAVQMDPELAKR	2	1	0.961686	0.940429	0.869392	0.716191	0.651383	2.66543	0.9931	0.616133	0.985274
VARS1	Valine--tRNA ligase	P26640	LQQTEAELR	1243	1	1.00264	1.00098	1.00711	1.03239	1.0714	10.4435	0.993	1.00125	1.07336
FUBP1	Far upstream element-binding protein 1	Q96AE4	SCMLTGTPESVQSAKR	147	1	0.957808	0.949573	0.939527	0.923091	0.906553	1.38753	0.993	0.867138	0.999945
RAD51AP1	RAD51-associated protein 1	Q96B01	MALDDKLYQR	88	1	0.992684	0.987862	1.02657	1.09591	1.19766	11.873	0.993	0.993111	1.22856
PTPN23	Tyrosine-protein phosphatase non-receptor type 23	Q9H3S7	VLSLQFR	1333	1	0.994505	0.971263	0.964654	0.964127	0.967891	0.032207	0.993	0.965507	0.999958
PRDX5	Peroxiredoxin-5	P30044	LLADPTGAFGK	149	1	1.00647	0.999698	0.980086	0.951098	0.916755	9.79243	0.9929	0.896215	1.00405
MCM4	DNA replication licensing factor MCM4	P33991	GMVSAYPR	725	1	1.02092	1.02061	1.03378	1.01955	0.703437	38.6966	0.9929	0.696394	1.01926
POLD2	DNA polymerase delta subunit 2	P49005	CCVVGTLFK	91	1	1.14326	1.20815	1.32969	1.51167	1.6682	2.12268	0.9929	1.00549	1.81797
MCM2	DNA replication licensing factor MCM2	P49736	ISHLPLVEELR	285	1	1.02559	1.01184	0.999251	0.956509	0.75479	66.5326	0.9929	0.584185	1.01126
GFPT1	Glutamine--fructose-6-phosphate aminotransferase [isomerizing] 1	Q06210	SDKNNEFIVIHNGIITNYK	112	1	1.0293	1.03614	1.05392	0.717276	0.564438	8.34387	0.9929	0.564408	1.02986
DYNC1H1	Cytoplasmic dynein 1 heavy chain 1	Q14204	VPVNLLR	4134	1	1.00762	1.03482	1.06157	1.12291	1.15606	1.79809	0.9929	0.999986	1.16931
RNF213	E3 ubiquitin-protein ligase RNF213	Q63HN8	ILANVTEDAKR	1070	1	1.02161	1.09269	1.14195	1.22935	1.27496	1.06687	0.9929	0.996966	1.31151
METTL13	eEF1A lysine and N-terminal methyltransferase	Q8N6R0	RIEGEVNEILFCQLHPEQK	641	1	1.08237	1.1455	1.2028	1.20859	1.19917	0.02133	0.9929	1.00061	1.20857
BRD8	Bromodomain-containing protein 8	Q9H0E9	AIMLVWR	715	1	1.39429	1.61939	1.95808	2.1006	2.43081	1.24823	0.9929	0.996544	2.85177
UBA6	Ubiquitin-like modifier-activating enzyme 6	A0AVT1	IQSGHSLEGCFQVIK	673	1	1.00202	1.01227	1.10439	1.13829	1.12166	0.423109	0.9928	1.00094	1.13017
STAT5B	Signal transducer and activator of transcription 5B	P51692	AVDGYVKPQIK	695	1	1.01482	0.888332	0.769187	0.730071	0.739574	0.125317	0.9928	0.738194	1.01201
BYSL	Bystin	Q13895	ELQSAVPR	420	1	0.983805	0.935302	0.817825	0.829882	0.814004	0.122844	0.9928	0.82053	0.991922
FYCO1	FYVE and coiled-coil domain-containing protein 1	Q9BQS8	AHVQELLQCSER	840	1	0.986829	0.982318	0.963623	0.950539	0.940232	0.805081	0.9928	0.932147	0.999546
OPA1	Dynamin-like 120 kDa protein	O60313	HFVDSELECNDVVLFWR	866	1	1.02213	0.779891	0.783402	0.760198	0.763019	0.059507	0.9927	0.768871	1.01107
ATP6V1B2	V-type proton ATPase subunit B	P21281	NYLSQPR	38	1	0.921893	1.37108	1.57834	1.58664	1.56363	0.084691	0.9927	0.960927	1.57622
FASTKD1	FAST kinase domain-containing protein 1	Q53R41	MLAEVLGGINCVK	706	1	1.1048	1.32978	1.45096	1.58622	1.61383	0.114125	0.9927	0.993726	1.62681
MTO1	Protein MTO1 homolog	Q9Y2Z2	LGDQPSIGLAQTLEK	213	1	0.979929	0.943774	0.912852	0.869052	0.864839	0.317807	0.9927	0.85412	1.00008
SNX3	Sorting nexin-3	O60493	KQGLEQFINK	119	1	0.996944	0.958853	0.77989	0.771096	0.736895	0.275276	0.9926	0.753097	0.999251
VCL	Vinculin	P18206	IPTISTQLK	1056	1	1.04482	1.0879	1.10914	1.15125	1.17907	0.358958	0.9926	0.998684	1.20402
ECHS1	Enoyl-CoA hydratase	P30084	GKNNTVGLIQLNRPK	42	1	1.01386	0.979024	1.01243	0.970236	0.6427	22.303	0.9926	0.638422	1.00133
KIF11	Kinesin-like protein KIF11	P52732	EAGNINQSLLTLGR	284	1	0.991414	0.991337	0.986546	0.939961	0.912215	6.10594	0.9926	0.909498	0.99466
PRKDC	DNA-dependent protein kinase catalytic subunit	P78527	LGLPGDEVDNKVK	2705	1	0.99656	0.956569	0.942718	0.9349	0.941248	0.055033	0.9926	0.939297	1.00037
PRKDC	DNA-dependent protein kinase catalytic subunit	P78527	LLSITVR	669	1	0.940394	1.0143	0.991149	1.00374	1.69555	20.9018	0.9926	0.986395	1.69584
HNRNPU	Heterogeneous nuclear ribonucleoprotein U	Q00839	RKMCLFAGFQR	591	1	1.00019	0.988111	1.11827	1.25737	1.31579	1.76115	0.9926	0.991514	1.31557
SNAPC2	snRNA-activating protein complex subunit 2	Q13487	EAQPPAPIEVWTDLAEK	93	1	0.95875	0.992726	0.946755	0.857696	0.516706	66.6535	0.9926	0.190714	0.981463
UAP1L1	UDP-N-acetylhexosamine pyrophosphorylase-like protein 1	Q3KQV9	FVFDVFR	384	1	1.00179	1.00643	0.991034	1.05346	1.1436	12.1484	0.9926	0.999787	1.1441
SUPT6H	Transcription elongation factor SPT6	Q7KZ85	KLEELLIK	1442	1	0.964336	0.94178	0.921809	0.915059	0.896882	0.09192	0.9926	0.888028	1.00027
LSM14A	Protein LSM14 homolog A	Q8ND56	SGGTPYIGSK	2	1	0.993769	1.00921	1.01411	0.941021	0.800248	12.2151	0.9926	0.800201	1.00427
DTX3L	E3 ubiquitin-protein ligase DTX3L	Q8TDB6	GGELTLLGTQDDISAAK	338	1	1.0096	0.973284	0.735373	0.758202	0.769429	0.14434	0.9926	0.75433	1.0048
PIK3C2A	Phosphatidylinositol 4-phosphate 3-kinase C2 domain-containing subunit alpha	O00443	TADVTSLFGGEDTSR	614	1	0.951357	0.926316	0.885048	0.871973	0.871241	0.045881	0.9925	0.864324	0.999291
CTIF	CBP80/20-dependent translation initiation factor	O43310	VLVCPIYTCLR	498	1	1.12943	1.14387	1.15953	1.19606	1.19868	0.014986	0.9925	0.999915	1.25956
MAP4	Microtubule-associated protein 4	P27816	TKPLATTQPAK	701	1	0.952494	0.941385	0.935696	0.935024	0.924452	0.002009	0.9925	0.913451	1.00002
ITPKB	Inositol-trisphosphate 3-kinase B	P27987	TYLEEELTK	750	1	1.00982	0.94524	0.921872	0.92557	0.920656	0.077995	0.9925	0.922704	1.0049
NDUFS1	NADH-ubiquinone oxidoreductase 75 kDa subunit	P28331	SATYVNTEGR	593	1	1.01116	1.01074	1.08882	1.18592	1.33196	8.82239	0.9925	0.999955	1.39074
GAPVD1	GTPase-activating protein and VPS9 domain-containing protein 1	Q14C86	LSAQAQVAEDILDKYR	1022	1	0.99642	0.969326	0.96087	0.965538	0.963046	0.038431	0.9925	0.96314	0.999916
TST	Thiosulfate sulfurtransferase	Q16762	FLGTEPEPDAVGLDSGHIR	188	1	1.00715	1.02803	0.844699	0.806542	0.80182	0.764536	0.9925	0.80418	1.01173
INTS1	Integrator complex subunit 1	Q8N201	ADEQTTCEVLDYFLRR	963	1	0.956054	0.862223	0.864964	0.847278	0.855698	0.016428	0.9925	0.855784	1.00003
NEDD1	Protein NEDD1	Q8NHV4	SINTDTLSK	377	1	0.951477	0.880404	0.748104	0.735018	0.716503	0.129234	0.9925	0.717755	0.993241
VPS33A	Vacuolar protein sorting-associated protein 33A	Q96AX1	AAHLSYGR	2	1	1.01182	1.01458	1.03527	1.10122	1.23624	15.5866	0.9925	1.00982	1.26708
EPPK1	Epiplakin	P58107	DGTSLWDLLSSCHFTEEQRR	1140	1	1.01227	0.915836	0.882421	0.869688	0.874687	0.083601	0.9924	0.875597	1.00614
PSMD5	26S proteasome non-ATPase regulatory subunit 5	Q16401	ILTLSQIGR	101	1	0.979125	1.00103	1.01785	1.06012	1.35066	16.1419	0.9924	0.999472	1.35154
CARMIL1	F-actin-uncapping protein LRRC16A	Q5VZK9	TEESSDVPR	2	1	0.91553	0.649946	0.535364	0.571592	0.580794	0.032101	0.9924	0.561993	0.998514
CAND1	Cullin-associated NEDD8-dissociated protein 1	Q86VP6	GYLISGSSYAR	972	1	1.00458	0.979691	1.00528	1.0054	1.26052	21.4509	0.9924	0.997346	1.26077
ORC4	Origin recognition complex subunit 4	O43929	AHSVYNFEKPVVMK	361	1	0.957104	0.899234	0.773951	0.660279	0.668414	0.396188	0.9923	0.648478	0.991839
NEMF	Ribosome quality control complex subunit NEMF	O60524	YKDQDEEDRELIMK	883	1	1.04521	1.03189	1.19618	1.34621	1.362	0.960875	0.9923	1.02066	1.3612
P4HB	Protein disulfide-isomerase	P07237	TVIDYNGER	453	1	0.970596	0.967138	1.06374	1.24567	1.25537	1.46919	0.9923	0.979023	1.25297
PKNOX1	Homeobox protein PKNOX1	P55347	EGKPFFCEDPETDNLMVK	103	1	1.01316	1.0531	1.18321	1.27333	1.38722	2.51704	0.9923	0.992954	1.43827
DYNC1H1	Cytoplasmic dynein 1 heavy chain 1	Q14204	SACDTVDTWLDDTAKGR	4214	1	0.990767	0.992462	0.982573	0.999952	0.81246	62.0654	0.9923	0.797154	0.993154
MDC1	Mediator of DNA damage checkpoint protein 1	Q14676	KSQLPAEGDAGAEWAAAVLK	597	1	0.979301	0.98413	0.992732	0.892166	0.795567	9.99604	0.9923	0.795436	0.989067
AACS	Acetoacetyl-CoA synthetase	Q86V21	SDGTLNPNGVR	540	1	1.01262	0.983442	0.984302	1.12849	1.29603	10.8986	0.9923	0.994992	1.29678
MICU1	Calcium uptake protein 1	Q9BPX6	SGLCSALTTYFFGADLK	272	1	0.942858	0.880497	0.730103	0.672356	0.597783	0.452586	0.9923	0.581531	0.999913
EHD2	EH domain-containing protein 2	Q9NZN4	VVLNKADMVETQQLMR	216	1	1.00075	1.00631	1.00343	1.00897	0.906037	52.8504	0.9923	0.894046	1.00398
MRPS18B	Small ribosomal subunit protein mS40	Q9Y676	DHGLLIYHIPQVEPR	159	1	0.998442	0.928323	0.932394	0.937523	0.930395	0.019131	0.9923	0.932158	1.00013
STK24	Serine/threonine-protein kinase 24	Q9Y6E0	NNPPTLEGNYSKPLK	246	1	1.05422	1.19526	1.27097	1.31812	1.34965	0.08176	0.9923	0.99534	1.3411
SORBS3	Vinexin	O60504	LKFDFQAQSPK	387	1	1.01445	1.00806	0.982584	0.928459	0.857214	14.4694	0.9922	0.821084	1.00858
SCP2	Sterol carrier protein 2	P22307	GSVLPNSDKKADCTITMADSDFLALMTGK	483	1	1.011	1.02278	0.855155	0.654023	0.546931	2.49459	0.9922	0.535512	1.01761
DLGAP5	Disks large-associated protein 5	Q15398	SANAFLTPSYTWTPLKTEVDESQATK	332	1	0.946551	0.93759	0.801123	0.67045	0.616979	1.20507	0.9922	0.597198	0.985532
SMC3	Structural maintenance of chromosomes protein 3	Q9UQE7	KGDVEGSQSQDEGEGSGESER	1059	1	1.02477	1.01276	1.00386	1.02447	1.24775	16.1924	0.9922	1.01031	1.24774
ZKSCAN1	Zinc finger protein with KRAB and SCAN domains 1	P17029	ASEYSPASLDAFGAFLK	544	1	0.897673	0.822737	0.793804	0.784204	0.755985	0.015096	0.9921	0.763949	1.00049
RBMX	RNA-binding motif protein	P38159	SDLYSSGR	332	1	1.0119	1.00263	0.899787	0.905456	0.909628	0.189902	0.9921	0.904953	1.00595
NFRKB	Nuclear factor related to kappa-B-binding protein	Q6P4R8	SGPALPFR	164	1	0.994855	0.994362	0.993803	1.02046	1.05688	11.4379	0.9921	0.995738	1.05698
NSD3	Histone-lysine N-methyltransferase NSD3	Q9BZ95	GLSDLQVGFGK	657	1	0.935509	0.899849	0.887546	0.87587	0.888087	0.007629	0.9921	0.882177	0.999977
THUMPD1	THUMP domain-containing protein 1	Q9NXG2	AQYVLAKR	20	1	0.979405	0.970713	0.853683	0.842664	0.834609	0.303431	0.9921	0.838014	0.9898
SHANK2	SH3 and multiple ankyrin repeat domains protein 2	Q9UPX8	LFVAVKPYQPQVDGEIPLHR	530	1	1.02004	1.02317	1.02093	0.880302	0.800689	8.36102	0.9921	0.800515	1.0161
ATIC	Bifunctional purine biosynthesis protein ATIC	P31939	EVSDGIIAPGYEEEALTILSK	336	1	1.03195	0.99679	1.01597	1.04709	1.35921	16.1922	0.992	1.01118	1.35931
SERPINH1	Serpin H1	P50454	TGLYNYYDDEKEK	240	1	0.969168	1.03309	0.991504	0.816032	0.437093	16.7007	0.992	0.403313	1.00026
PRKDC	DNA-dependent protein kinase catalytic subunit	P78527	NLSSNEAISLEEIR	839	1	1.01082	1.04285	1.00783	1.05405	1.41942	16.5347	0.992	1.01539	1.41955
PRKDC	DNA-dependent protein kinase catalytic subunit	P78527	EQQHVMEELFQSSFR	1769	1	0.995322	1.0035	1.05876	1.13698	1.58063	29.337	0.992	1.01064	1.69351
ZNF45	Zinc finger protein 45	Q02386	YLPHEELFCSQIWQQITR	96	1	1.08337	1.05444	0.967116	0.700879	0.257275	21.1657	0.992	0.043936	1.04755
MDC1	Mediator of DNA damage checkpoint protein 1	Q14676	GIPILSLDWLHQSR	1944	1	0.947697	0.98374	1.01729	1.30996	1.38322	3.94291	0.992	0.976589	1.3855
INF2	Inverted formin-2	Q27J81	IGNFLNYGSHTGDADGFK	764	1	1.00367	0.996201	1.02737	1.07339	1.10032	3.52294	0.992	0.999007	1.10459
AP2M1	AP-2 complex subunit mu	Q96CW1	DIILPFRVIPLVR	282	1	1.01165	0.988368	1.02548	1.21351	1.19653	1.82878	0.992	1.00001	1.20539
PFDN5	Prefoldin subunit 5	Q99471	LHDVEHVLIDVGTGYYVEK	76	1	1.02794	1.39375	2.19355	2.35196	2.17892	0.166227	0.992	1.00683	2.26477
KIN	DNA/RNA-binding protein KIN17	O60870	SALDEIMEIEEEKKR	259	1	0.891738	0.839064	0.736764	0.670215	0.666735	0.116165	0.9919	0.637179	0.997334
XRCC5	X-ray repair cross-complementing protein 5	P13010	RFFMGNQVLK	354	1	0.984388	1.00374	0.971745	0.925664	0.76206	76.4531	0.9919	0.573852	0.994858
RBM5	RNA-binding protein 5	P52756	ESAAADAGFALFEK	575	1	0.963909	0.946306	0.917091	0.884046	0.879441	0.273218	0.9919	0.861722	0.999144
EIF4A1	Eukaryotic initiation factor 4A-I	P60842	GIYAYGFEKPSAIQQR	46	1	0.994445	0.962655	1.03114	1.09075	1.59653	17.4901	0.9919	0.997011	1.5996
TOMM34	Mitochondrial import receptor subunit TOM34	Q15785	RASAYEALEKYPMAYVDYK	91	1	0.991479	0.999701	1.07373	1.06708	1.06784	0.209317	0.9919	0.995646	1.06961
ATAD5	ATPase family AAA domain-containing protein 5	Q96QE3	QMENTTSHANSRDNVTEAAQLNDSIITVSYEEFLK	238	1	1.01421	0.989893	1.08396	0.901196	0.115024	15.6321	0.9919	0.11451	1.02199
HDHD3	Haloacid dehalogenase-like hydrolase domain-containing protein 3	Q9BSH5	IFQEALR	172	1	1.01919	1.05155	1.02475	1.13223	1.4791	13.7528	0.9919	1.02386	1.47942
RRBP1	Ribosome-binding protein 1	Q9P2E9	ATQKGDPVAILKR	688	1	0.988973	0.983912	0.966685	0.953588	0.937185	1.4665	0.9919	0.928454	0.999846
ZNF330	Zinc finger protein 330	Q9Y3S2	ACFCDDHTR	191	1	0.853265	0.815842	0.794568	0.797957	0.768318	0.001298	0.9919	0.76668	1.00008
KIF5B	Kinesin-1 heavy chain	P33176	LYLVDLAGSEK	227	1	1.04849	1.02785	1.0368	1.11458	1.46938	14.1121	0.9918	1.02828	1.46952
AHNAK	Neuroblast differentiation-associated protein AHNAK	Q09666	MYFPDVEFDIKSPK	5088	1	0.965528	0.891319	0.872857	0.864241	0.852079	0.029861	0.9918	0.860606	1.00058
CSTF3	Cleavage stimulation factor subunit 3	Q12996	GCVNPMINIEQLWR	175	1	0.716063	0.666894	0.676541	0.674906	0.64225	0.00149	0.9918	0.662972	1.00002
TTF1	Transcription termination factor 1	Q15361	LQENPESCLSIVR	701	1	1.00514	0.969887	0.945391	0.887642	0.816175	21.8793	0.9918	0.719944	1.004
SETD5	Histone-lysine N-methyltransferase SETD5	Q9C0A6	SAGAGQGSSNSVSDTGAHGVQGSSAR	1096	1	0.917745	0.857746	0.823198	0.776182	0.78531	0.035959	0.9918	0.772011	0.999915
RC3H2	Roquin-2	Q9HBD1	HSSTGDLLSLELQQAK	981	1	0.99012	1.00996	1.09299	1.22805	1.20503	1.10482	0.9918	0.999928	1.21673
CES2	Cocaine esterase	O00748	ADHGDELPFVFR	455	1	1.02148	0.963929	0.917982	0.812302	0.537046	107.687	0.9917	0.059843	1.00333
TUBA4A	Tubulin alpha-4A chain	P68366	EIIDPVLDR	113	1	1.00836	0.965772	0.704909	0.664104	0.609412	0.394328	0.9917	0.634421	1.00544
PLEC	Plectin	Q15149	VIDRELYQQLQR	3128	1	0.998711	0.935153	0.926158	0.935139	0.934353	0.035194	0.9917	0.931815	1.00035
ATP2A3	Sarcoplasmic/endoplasmic reticulum calcium ATPase 3	Q93084	MNVFDTDLQALSR	452	1	1.01011	1.02737	1.09585	1.22139	1.48975	16.9162	0.9917	1.00942	1.60389
GNL3	Guanine nucleotide-binding protein-like 3	Q9BVP2	KVIEASDVVLEVLDAR	136	1	1.0103	1.00611	0.988161	0.929145	0.93189	1.40567	0.9917	0.930479	1.00547
NUDT9	ADP-ribose pyrophosphatase	Q9BW91	LYASHSQFIK	320	1	1.00896	0.96037	0.882452	0.838853	0.849388	0.285171	0.9917	0.842999	1.00592
PHAX	Phosphorylated adapter RNA export protein	Q9H814	QSETYNYLLAK	148	1	1.05503	1.12109	1.20256	1.24837	1.33159	0.786358	0.9917	0.996796	1.37558
OSBP	Oxysterol-binding protein 1	P22059	LTEDLEYHELLDR	450	1	0.93201	1.00745	0.907124	1.09728	2.00649	19.5816	0.9916	0.961678	2.01655
ECHS1	Enoyl-CoA hydratase	P30084	LFYSTFATDDRK	262	1	1.04651	1.00884	0.998602	0.956561	0.552092	46.0508	0.9916	0.40349	1.01439
KIF5B	Kinesin-1 heavy chain	P33176	VFQSSTSQEQVYNDCAK	51	1	0.966183	1.02245	1.00639	1.19344	1.47158	13.5106	0.9916	0.995644	1.49853
ABCF1	ATP-binding cassette sub-family F member 1	Q8NE71	NLDFGIDMDSR	643	1	0.995209	1.02715	1.065	1.0876	1.09689	0.339612	0.9916	0.995858	1.09613
VAPB	Vesicle-associated membrane protein-associated protein B/C	O95292	IISTTASKTETPIVSK	140	1	1.19859	1.20324	1.20673	1.22995	1.25763	0.004125	0.9915	0.999834	1.37012
BAG3	BAG family molecular chaperone regulator 3	O95817	ELLALDSVDPEGR	461	1	0.973318	0.959071	0.941558	0.901369	0.8812	3.80027	0.9915	0.837474	0.998902
RXRB	Retinoic acid receptor RXR-beta	P28702	HAAGQCGPVGVR	14	1	1.01713	1.02439	1.04381	1.06125	1.07303	0.422425	0.9915	0.99949	1.07883
HEATR3	HEAT repeat-containing protein 3	Q7Z4Q2	HVDFLEAISSALR	508	1	0.999959	0.995234	1.00497	0.939868	0.930452	5.89232	0.9915	0.930567	1.00008
DOHH	Deoxyhypusine hydroxylase	Q9BU89	HEAGEALGAIGDPEVLEILK	89	1	1.03291	1.02098	0.889807	0.724104	0.652737	2.06635	0.9915	0.648606	1.02328
RPLP0	Large ribosomal subunit protein uL10	P05388	EESEESDEDMGFGLFD	302	1	0.916323	0.622293	0.458139	0.411643	0.483068	0.049947	0.9914	0.444695	0.9982
HADHB	Trifunctional enzyme subunit beta	P55084	LEQDEYALR	239	1	1.01622	1.00376	0.974756	0.949627	0.685072	91.3908	0.9914	0.397718	1.00125
CCAR2	Cell cycle and apoptosis regulator protein 2	Q8N163	INPLPGGR	9	1	0.968074	0.991571	0.937863	0.790905	0.717722	4.37309	0.9914	0.708088	0.987957
RNF31	E3 ubiquitin-protein ligase RNF31	Q96EP0	GGCMHFHCTQCR	883	1	1.06113	1.0556	0.795252	0.501407	0.534132	1.02547	0.9914	0.517771	1.03891
SMG1	Serine/threonine-protein kinase SMG1	Q96Q15	LLEEIEFLEGAEGVDHPSHTLQHR	2512	1	1.05984	1.27239	1.54533	1.52598	1.59527	0.106466	0.9914	1.00948	1.56967
SPAG5	Sperm-associated antigen 5	Q96R06	LGLQEGSNNSSPVDFVNNKR	56	1	0.958819	0.943688	0.921072	0.895566	0.854526	7.09485	0.9914	0.787511	0.999113
ACTN4	Alpha-actinin-4	O43707	ISIEMNGTLEDQLSHLK	675	1	1.0569	1.42664	1.1964	1.52998	5.08007	26.3971	0.9913	1.1695	5.23988
GNAI3	Guanine nucleotide-binding protein G(i) subunit alpha-3	P08754	IDFGEAAR	93	1	1.21095	1.68576	1.92834	2.1337	2.25595	0.099436	0.9913	0.984109	2.24877
PDIA4	Protein disulfide-isomerase A4	P13667	IANILKDKDPPIPVAK	104	1	0.999686	0.935239	0.673655	0.66226	0.708992	0.135602	0.9913	0.681621	0.999846
MARS1	Methionine--tRNA ligase	P56192	HGNQYIQVNEPWKR	714	1	1.04127	1.01649	1.03687	1.11593	1.41949	12.8325	0.9913	1.02366	1.41951
C6orf132	Uncharacterized protein C6orf132	Q5T0Z8	EAEKDSPLTTEIPNKWGPR	901	1	1.02825	1.03748	1.11536	1.16868	1.18646	0.6616	0.9913	1.00735	1.19136
FAM83H	Protein FAM83H	Q6ZRV2	VQLLHKEQTVSETLGPGGEAVR	706	1	1.00331	0.995117	0.916761	0.878763	0.855803	0.715487	0.9913	0.863165	1.00359
SUGP1	SURP and G-patch domain-containing protein 1	Q8IWZ8	MNMNILHQEELIAQK	28	1	1.03178	0.994619	1.18914	1.33712	1.31416	0.918176	0.9913	1.00873	1.32569
PDCD6	Programmed cell death protein 6	O75340	QALSGFGYR	117	1	1.02936	1.00617	0.972925	1.15158	1.47724	13.0572	0.9912	1.0021	1.47851
TPR	Nucleoprotein TPR	P12270	RLEQEKELLHSQNTWLNTELK	182	1	0.984455	1.17108	1.26936	1.30689	1.27682	0.084795	0.9912	0.991863	1.2845
OSBP	Oxysterol-binding protein 1	P22059	ATEDGTPYDPYKALWFER	757	1	1.21522	1.09079	1.25668	1.7643	2.99617	34.1275	0.9912	1.10257	3.73942
HADHA	Trifunctional enzyme subunit alpha	P40939	DATLTALDR	391	1	0.966254	0.993067	0.971353	0.92918	0.646561	19.3687	0.9912	0.641371	0.982746
SERPINH1	Serpin H1	P50454	LFYADHPFIFLVR	381	1	0.978296	0.957984	0.917702	0.843361	0.41907	87.0189	0.9912	-0.06907	0.972766
PRKDC	DNA-dependent protein kinase catalytic subunit	P78527	ILDVMYSR	1876	1	0.962365	1.0105	1.04547	1.06887	1.70487	18.8276	0.9912	1.00457	1.70652
MRPS22	Small ribosomal subunit protein mS22	P82650	GKYDLLR	257	1	0.843639	0.769647	0.740097	0.666807	0.666237	0.025271	0.9912	0.632134	1
ACACA	Acetyl-CoA carboxylase 1	Q13085	IYVSANSGAR	1714	1	1.02191	1.03259	1.10486	1.20426	1.32547	4.3659	0.9912	1.00417	1.35376
HLTF	Helicase-like transcription factor	Q14527	VFIQHITLSDEER	663	1	0.983815	1.10529	1.13961	1.13481	1.12747	0.06199	0.9912	0.991549	1.13401
RAD50	DNA repair protein RAD50	Q92878	NVKYELQQLEGSSDR	459	1	1.03079	1.10937	1.13851	1.16143	1.16998	0.051002	0.9912	0.998099	1.16451
LARS1	Leucine--tRNA ligase	Q9P2J5	NLETFCEETR	549	1	0.9968	1.00365	0.988944	1.07444	1.11743	8.1429	0.9912	0.997279	1.11754
IRF6	Interferon regulatory factor 6	O14896	LQISTPDIKDNIVAQLK	421	1	0.93246	0.910547	0.877279	0.870266	0.838484	0.362078	0.9911	0.790737	1.00015
MYH9	Myosin-9	P35579	CIIPNHEKK	671	1	0.972838	0.990957	0.962035	1.08878	1.3302	11.9861	0.9911	0.981457	1.33022
ARHGEF1	Rho guanine nucleotide exchange factor 1	Q92888	QLEELEEEFCR	883	1	0.960419	1.0873	1.29117	1.76128	1.78864	1.51309	0.9911	1.00288	1.81073
OSBPL2	Oxysterol-binding protein-related protein 2	Q9H1P3	MQSVAAFAVSAVASQWER	130	1	0.964783	1.13854	1.0583	1.80557	2.49431	9.55609	0.9911	1.03311	2.51899
CYRIB	CYFIP-related Rac1 interactor B	Q9NUQ9	VMLETPEYR	233	1	0.974716	0.971418	1.15501	1.20116	1.21424	0.656396	0.9911	0.981762	1.20767
FARSA	Phenylalanine--tRNA ligase alpha subunit	Q9Y285	FKPAYNPYTEPSMEVFSYHQGLKK	405	1	1.07516	1.06041	1.06791	0.898592	0.34513	16.645	0.9911	0.337971	1.05095
ACACA	Acetyl-CoA carboxylase 1	Q13085	GVISDILDWKTSR	2200	1	0.955713	1.00286	0.980693	1.13661	1.42351	12.88	0.991	0.984656	1.4259
TGFBRAP1	Transforming growth factor-beta receptor-associated protein 1	Q8WUH2	FLMSYLNEVR	427	1	0.983605	1.00978	0.991334	1.08958	1.22067	11.2516	0.991	0.996137	1.22108
PIK3R4	Phosphoinositide 3-kinase regulatory subunit 4	Q99570	NGHFFPEQVLNKIEDHSIR	269	1	1.2076	1.2933	1.4091	1.56643	1.75812	2.04553	0.991	1.00198	1.97116
SERPINH1	Serpin H1	P50454	AVAISLPK	301	1	1.04437	1.01988	0.96994	0.874224	0.58304	81.027	0.9909	0.207042	1.02103
HSD17B4	Peroxisomal multifunctional enzyme type 2	P51659	ICDFENASKPQSIQESTGSIIEVLSK	276	1	1.02547	0.71147	0.697683	0.709233	0.668053	0.061986	0.9909	0.691657	1.01274
EIF3E	Eukaryotic translation initiation factor 3 subunit E	P60228	NLYSDDIPHALR	60	1	0.972431	1.00223	1.02065	1.10972	1.33233	19.0515	0.9909	0.994406	1.3777
EIF3I	Eukaryotic translation initiation factor 3 subunit I	Q13347	HVLTGSADNSCR	66	1	0.95025	0.961623	1.1376	1.37263	1.75365	19.8653	0.9909	0.962858	2.03583
MCCC1	Methylcrotonoyl-CoA carboxylase subunit alpha	Q96RQ3	ESLCQAALGLILKEK	506	1	0.960091	1.02909	1.02682	1.08703	1.64961	19.0876	0.9909	1.00395	1.65432
ESYT1	Extended synaptotagmin-1	Q9BSJ8	IHVLEAQDLIAK	651	1	1.03197	1.17824	1.19561	1.22663	1.21087	0.032358	0.9909	0.999463	1.21197
OSBPL2	Oxysterol-binding protein-related protein 2	Q9H1P3	LFMIYGK	295	1	1.44829	1.39856	1.42208	3.09803	5.19779	12.2945	0.9909	1.27447	5.46758
TPR	Nucleoprotein TPR	P12270	KTETMNVVMETNK	1265	1	0.995235	0.973617	0.955781	0.914404	0.90071	1.5411	0.9908	0.88815	1.00005
HPS6	BLOC-2 complex member HPS6	Q86YV9	ALQLQLDGNGK	524	1	1.04994	1.11018	1.2712	1.33656	1.42654	0.631933	0.9908	0.998593	1.44739
DHX38	Pre-mRNA-splicing factor ATP-dependent RNA helicase PRP16	Q92620	IVFTKQPEPVIPVK	421	1	0.974525	0.947725	0.818322	0.804833	0.786689	0.252647	0.9908	0.794141	0.989268
KIF16B	Kinesin-like protein KIF16B	Q96L93	GVFDYSSHGTG	1307	1	0.993264	0.999256	1.05182	1.05438	1.04849	0.245318	0.9908	0.996576	1.05174
VPS51	Vacuolar protein sorting-associated protein 51 homolog	Q9UID3	FISATDTIRK	115	1	0.986951	1.00905	0.976582	0.950965	0.740893	127.494	0.9908	0.421093	0.9954
RABGAP1	Rab GTPase-activating protein 1	Q9Y3P9	STTENFFLK	447	1	0.998668	0.986523	0.951101	0.957848	0.95393	0.132914	0.9908	0.954275	0.999349
MPI	Mannose-6-phosphate isomerase	P34949	LLASSDPLAQIAEDKPYAELWMGTHPR	30	1	0.899513	0.864701	0.807865	0.776043	0.692082	6.45386	0.9907	0.536574	0.999579
FDFT1	Squalene synthase	P37268	IPDSDPSSSK	349	1	1.00713	0.920426	1.60852	1.65807	1.60849	0.493396	0.9907	0.975809	1.63362
SPIRE2	Protein spire homolog 2	Q8WWL2	ALDWGLDESEER	108	1	0.876834	0.794428	0.559749	0.441333	0.431496	0.226922	0.9907	0.402505	0.985694
DDX1	ATP-dependent RNA helicase DDX1	Q92499	ELLIIGGVAAR	320	1	1.05555	0.987654	1.06083	1.19502	1.77706	13.5474	0.9907	1.026	1.77728
CDK12	Cyclin-dependent kinase 12	Q9NYV4	DSKPIALKEEIVTPK	502	1	0.992687	0.995117	1.00103	0.979822	0.915966	21.0606	0.9907	0.911473	0.99722
PFDN2	Prefoldin subunit 2	Q9UHV9	SSGSGAGKGAVSAEQVIAGFNR	11	1	0.955824	0.843636	0.71382	0.650785	0.688466	0.113764	0.9907	0.667357	0.996831
SULT2B1	Sulfotransferase 2B1	O00204	NHFTVAQSEAFDR	283	1	0.973123	0.977198	0.961606	0.946549	0.660693	21.9497	0.9906	0.656297	0.97802
AIFM1	Apoptosis-inducing factor 1	O95831	SATEQSGTGIR	519	1	1.02927	0.96377	0.828539	0.721507	0.72919	0.560414	0.9906	0.719338	1.01374
NEDD4	E3 ubiquitin-protein ligase NEDD4	P46934	SYYVDHNSR	783	1	0.981831	0.955863	0.922799	0.884909	0.887685	0.285927	0.9906	0.879032	0.998844
RFX5	DNA-binding protein RFX5	P48382	GAVLAQGQGDGTVSK	527	1	1.00573	1.01946	1.10108	1.08906	1.10058	0.168986	0.9906	1.00281	1.09707
GTF2I	General transcription factor II-I	P78347	VENLFNEK	737	1	0.999368	1.00291	1.07323	1.13346	1.18656	2.69643	0.9906	0.994653	1.1997
PRKDC	DNA-dependent protein kinase catalytic subunit	P78527	KFIQTFGK	3631	1	1.29245	1.43309	1.58911	1.61103	1.73851	0.052994	0.9906	0.99898	1.7923
NSUN2	RNA cytosine C(5)-methyltransferase NSUN2	Q08J23	EGVILTNESAASTGQPDNDVTEGQR	713	1	0.990775	1.00479	0.943494	0.868606	0.841739	1.91745	0.9906	0.841672	1.0001
EXO1	Exonuclease 1	Q9UQ84	FFCSSDSTDCVSNK	506	1	1.02442	0.968034	0.947091	0.785494	0.628222	11.3148	0.9906	0.549756	1.00549
SCRIB	SCRIB overlapping open reading frame protein	C0HLS1	GVGGQAALFAAGR	40	1	1.01266	0.982523	0.892247	0.885283	0.898446	0.146965	0.9905	0.891943	1.00633
PRKDC	DNA-dependent protein kinase catalytic subunit	P78527	SQGCSEQVLTVLK	3290	1	1.03307	1.00282	1.02997	1.08878	1.36105	16.5685	0.9905	1.01637	1.36402
PSME1	Proteasome activator complex subunit 1	Q06323	VDVFREDLCTK	14	1	0.983892	1.00654	1.03179	1.09871	1.14378	4.34256	0.9905	0.993021	1.15615
MCM6	DNA replication licensing factor MCM6	Q14566	ASSAAGLTAAVVR	423	1	0.950208	0.963332	0.949835	0.893682	0.526152	75.1306	0.9905	0.202394	0.968323
FASTKD5	FAST kinase domain-containing protein 5	Q7L8L6	LAVQFTNR	697	1	0.95802	0.983914	0.955371	0.969093	1.39091	54.1599	0.9905	0.97328	1.39775
COG8	Conserved oligomeric Golgi complex subunit 8	Q96MW5	GQLAPVFQR	365	1	0.987466	0.970411	0.99388	1.05525	1.23051	25.8546	0.9905	0.98652	1.27675
VPS33B	Vacuolar protein sorting-associated protein 33B	Q9H267	SWQGLDEVVR	533	1	1.06966	1.1121	1.13917	1.12783	1.13791	0.008001	0.9905	0.998591	1.1357
AHNAK	Neuroblast differentiation-associated protein AHNAK	Q09666	VDINAPDVEVHGPDWHLK	1492	1	0.991603	0.990224	0.996523	0.9522	0.909537	10.0163	0.9904	0.909473	0.994616
PRKD2	Serine/threonine-protein kinase D2	Q9BZL6	YITHESDDAR	827	1	0.941648	0.862216	0.768862	0.695422	0.717467	0.128178	0.9904	0.69806	0.997381
VPS4A	Vacuolar protein sorting-associated protein 4A	Q9UN37	WLGESEK	201	1	0.985475	0.987227	1.08458	1.1008	1.11011	0.625085	0.9904	0.990805	1.10549
EXOSC1	Exosome complex component CSL4	Q9Y3B2	YCIPGER	7	1	0.997367	1.01988	1.05407	1.09811	1.1637	6.01221	0.9904	0.996457	1.19375
HYOU1	Hypoxia up-regulated protein 1	Q9Y4L1	LYQPEYQEVSTEEQREEISGK	754	1	1.08658	1.25891	1.33083	1.41937	1.43557	0.076118	0.9904	0.995491	1.43884
RARS1	Arginine--tRNA ligase	P54136	YADLSHNR	505	1	0.994973	1.04824	1.10891	1.14403	1.13431	0.2	0.9903	0.994814	1.13944
KTN1	Kinectin	Q86UP2	EASSASQFEELEIVLKEKENELK	921	1	0.974608	0.889229	0.839909	0.838268	0.855653	0.044844	0.9903	0.843674	0.998965
HDHD3	Haloacid dehalogenase-like hydrolase domain-containing protein 3	Q9BSH5	LAVISNFDR	131	1	0.995249	0.951417	0.99723	1.07058	1.42458	53.0976	0.9903	0.98385	1.64082
PLEKHA5	Pleckstrin homology domain-containing family A member 5	Q9HAU0	TRPESICSVTPSTHDK	467	1	1.07271	1.05876	1.28779	1.61719	1.58214	1.10027	0.9903	1.04347	1.60064
MYH10	Myosin-10	P35580	NRLQQELDDLTVDLDHQR	1423	1	1.01027	1.00571	0.97503	0.932777	0.877213	11.9379	0.9902	0.845164	1.00703
LRPPRC	Leucine-rich PPR motif-containing protein	P42704	EKDIQEESTFSSR	65	1	0.99257	0.984235	0.938651	0.943231	0.939738	0.161924	0.9902	0.940402	0.996271
RIOX1	Ribosomal oxygenase 1	Q9H6W3	REPYGHLGPAELLEASPAAR	94	1	0.952158	0.913088	0.712702	0.621983	0.646008	0.340688	0.9902	0.630553	0.980866
CLPX	ATP-dependent Clp protease ATP-binding subunit clpX-like	O76031	AQQGIVFLDEVDKIGSVPGIHQLR	350	1	0.997903	1.01678	1.00703	0.845086	0.858964	2.68714	0.9901	0.852025	1.00545
EIF5A	Eukaryotic translation initiation factor 5A-1	P63241	GRPCKIVEMSTSK	35	1	1.02824	1.00068	0.993431	0.831779	0.791761	4.25881	0.9901	0.790739	1.00987
AP2M1	AP-2 complex subunit mu	Q96CW1	TFITQQGIK	131	1	1.00894	1.00197	0.991608	1.0597	1.13543	10.8695	0.9901	1.00061	1.13561
AP5Z1	AP-5 complex subunit zeta-1	O43299	DANTALPLALR	782	1	1.02059	0.887916	0.814003	0.816753	0.833504	0.087288	0.99	0.821419	1.0103
RNASEH2A	Ribonuclease H2 subunit A	O75792	KITSYFLNEGSQARPR	267	1	0.998874	0.926441	0.901494	0.884496	0.894203	0.063711	0.99	0.89296	1.00145
RANGAP1	Ran GTPase-activating protein 1	P46060	ELNLSFCEIKR	297	1	1.0008	1.06504	1.16116	1.1385	1.15337	0.112067	0.99	1.00015	1.15121
RPS3A	Small ribosomal subunit protein eS1	P61247	VVDPFSKKDWYDVK	21	1	1.00047	1.00169	0.974027	0.953251	0.804068	122.354	0.99	0.577913	0.99775
ABR	Active breakpoint cluster region-related protein	Q12979	CSQSNNQFQK	201	1	1.18643	1.65179	2.01733	2.00865	2.17394	0.06538	0.99	0.996854	2.10877
TOP3A	DNA topoisomerase 3-alpha	Q13472	GIADLLSNGR	48	1	0.988659	0.985889	0.976416	1.05976	1.17105	11.198	0.99	0.98773	1.17108
SETX	Probable helicase senataxin	Q7Z333	KGPAEVDTVDAFQGR	2366	1	0.969637	1.20726	1.26662	1.25287	1.23764	0.062224	0.99	0.984566	1.25244
ERBIN	Erbin	Q96RT1	DFNLPEYDLNVEER	727	1	0.986813	0.914642	0.834318	0.781149	0.80309	0.162525	0.99	0.791188	1.00142
SEPHS2	Selenide	Q99611	NEVSFVIHNLPIIAK	335	1	0.850954	0.815161	0.665964	0.599304	0.472326	6.1706	0.99	0.213017	0.999205
SMARCAD1	SWI/SNF-related matrix-associated actin-dependent regulator of chromatin subfamily A containing DEAD/H box 1	Q9H4L7	VLCYYGSQEER	573	1	1.01271	1.00711	0.958685	0.9035	0.879496	1.82631	0.99	0.878858	1.00872
L2HGDH	L-2-hydroxyglutarate dehydrogenase	Q9H9P8	MDGSIWLGPNAVLAFK	319	1	1.03332	1.0287	0.831405	0.780732	0.793634	0.753305	0.99	0.787183	1.02067
GEMIN8	Gem-associated protein 8	Q9NWZ8	SVEAPTERPGER	185	1	1.03299	1.12803	1.13646	1.15564	1.13859	0.02355	0.99	0.999884	1.14404
PHF8	Histone lysine demethylase PHF8	Q9UPP1	DGLGMTLPSPSFTVR	167	1	0.97861	1.00373	1.0387	1.13967	1.45776	16.0202	0.99	1.00343	1.47352
P4HB	Protein disulfide-isomerase	P07237	VDATEESDLAQQYGVR	82	1	1.08269	1.11995	1.25701	1.5736	1.67884	2.31007	0.9899	1.03823	1.72909
FKBP4	Peptidyl-prolyl cis-trans isomerase FKBP4	Q02790	LQAFSAAIESCNKALELDSNNEK	332	1	0.999105	0.975085	0.877378	0.744975	0.768789	1.01587	0.9899	0.755582	0.9927
RABEP1	Rab GTPase-binding effector protein 1	Q15276	ATVEQLMFEEK	791	1	0.997969	1.04238	1.17124	1.24514	1.32323	1.13216	0.9899	0.990188	1.33276
CABLES1	CDK5 and ABL1 enzyme substrate 1	Q8TDN4	LAQEDCGLEEPTVAMAFVYFEK	526	1	0.990072	1.13315	1.23699	1.2708	1.23747	0.091405	0.9899	0.993363	1.24945
RPAP3	RNA polymerase II-associated protein 3	Q9H6T3	FALQKLEEAK	212	1	0.996236	0.868808	0.762083	0.762581	0.725171	0.095324	0.9899	0.745233	1.00452
TBCA	Tubulin-specific chaperone A	O75347	LEAAYLDLQR	71	1	0.982204	0.967152	0.965395	0.959371	0.96117	0.012298	0.9898	0.960972	1.00004
ECHS1	Enoyl-CoA hydratase	P30084	EGMTAFVEKR	274	1	1.03379	1.02205	0.962719	0.934769	0.46494	129.467	0.9898	-0.24568	1.0084
RPS6KA3	Ribosomal protein S6 kinase alpha-3	P51812	LTAALVLR	668	1	1.00474	0.984939	0.964005	1.05224	1.33887	16.9976	0.9898	0.988422	1.34113
PRKDC	DNA-dependent protein kinase catalytic subunit	P78527	LATTILQHWK	1618	1	1.08455	1.06149	1.11006	1.33848	1.75522	17.2699	0.9898	1.04934	1.8729
ZNF638	Zinc finger protein 638	Q14966	DSNKPVTIPENSEIK	854	1	1.00582	1.02182	1.17036	1.20738	1.17718	0.329152	0.9898	1.00283	1.19227
TNPO1	Transportin-1	Q92973	LIPVLVNGMK	308	1	0.945233	1.02269	1.14099	1.33996	1.44569	2.52112	0.9898	0.973469	1.4733
BIRC6	Baculoviral IAP repeat-containing protein 6	Q9NR09	LMAQVLCELFQTSPQR	3780	1	0.979991	1.00443	1.03919	1.13445	1.1534	2.11638	0.9898	0.992856	1.15596
HADHA	Trifunctional enzyme subunit alpha	P40939	HVAEDLGKVFGER	598	1	1.00191	0.961488	0.949099	0.895321	0.54876	101.841	0.9897	0.1087	0.983411
EIF4A1	Eukaryotic initiation factor 4A-I	P60842	AILPCIK	62	1	0.931688	0.983145	0.993864	1.03018	1.56522	18.2487	0.9897	0.97717	1.56607
AHNAK	Neuroblast differentiation-associated protein AHNAK	Q09666	IKGDVPSVGLEGPDVDLQGPEAK	5208	1	1.00981	1.00853	0.984806	0.876625	0.892975	1.37126	0.9897	0.884797	1.00611
[truncated: 81,752 more rows]
