# Supplementary material for: A Two-Dimensional Peptide-Centric Stability Assay Maps Multidimensional Target Landscapes Unveiling 17β-Estradiol (E2)-GPX4 Binding-Induced Ferroptosis
Source: Research Square preprint supplement (doi:10.21203/rs.3.rs-6893001/v1), 2025-07-04
Supplement: Supplementary file 3 [file 27fc457f36609514fd30a23b.xlsx]

## Sheet: parameter description
Supplementary Table 7: GO analysis of the 37 E2-stabilized proteins with weak interaction with E2 (<mM) in terms of biological process and molecular function
GO enrichment analysis were analyzed by the computation of DAVID software.
The 6825 proteins quantified were set as the reference gene list.
BP	Biological Process
MF	Molecular component
Count	Number of genes involved in the givern term.
%	Number of genes involved in given term is divided by the total number of user’s input genes.
p value	To examine the significance of gene–term enrichment with a modified Fisher’s exact test (EASE score).
Fold Enrichment	To measure the magnitude of enrichment. For example, 10% of user’s genes are kinases versus 1% of genes in human genome (this is population background) are kinases. Thus, the fold enrichment is tenfold. Fold enrichment along with EASE score could rank the enriched terms in a more comprehensive way.
Bonferroni	To globally correct enrichment p values to control family-wide false discovery rate under certain rate (e.g., r0.05). It is one of the multiple testing correction techniques (Bonferroni, Benjamini and FDR) provided by DAVID.
Benjamini
FDR	False discovery rate

## Sheet: GO
Category	Term	Count	%	p value	Genes	List Total	Pop Hits	Pop Total	Fold Enrichment	Bonferroni	Benjamini	FDR
GOTERM_BP_DIRECT	GO:0006635~fatty acid beta-oxidation	5	13.5135	1.51189e-05	P22307, P40939, P30084, Q16698, P55084	36	29	6510	31.1782	0.00378768	0.00377972	0.00377972
GOTERM_BP_DIRECT	GO:0014733~regulation of skeletal muscle adaptation	2	5.40541	0.0107246	Q13555, Q13554	36	2	6510	180.833	0.933224	1	1
GOTERM_BP_DIRECT	GO:0006432~phenylalanyl-tRNA aminoacylation	2	5.40541	0.0213374	Q9NSD9, Q9Y285	36	4	6510	90.4167	0.995545	1	1
GOTERM_BP_DIRECT	GO:0046598~positive regulation of viral entry into host cell	2	5.40541	0.0370496	P09429, P07237	36	7	6510	51.6667	0.999923	1	1
GOTERM_BP_DIRECT	GO:0051924~regulation of calcium ion transport	2	5.40541	0.0370496	Q13555, Q13554	36	7	6510	51.6667	0.999923	1	1
GOTERM_BP_DIRECT	GO:0048168~regulation of neuronal synaptic plasticity	2	5.40541	0.047388	Q13555, Q13554	36	9	6510	40.1852	0.999995	1	1
GOTERM_BP_DIRECT	GO:0006693~prostaglandin metabolic process	2	5.40541	0.047388	O00748, Q14914	36	9	6510	40.1852	0.999995	1	1
GOTERM_BP_DIRECT	GO:0000727~double-strand break repair via break-induced replication	2	5.40541	0.0576185	Q14566, P33991	36	11	6510	32.8788	1	1	1
GOTERM_BP_DIRECT	GO:0051290~protein heterotetramerization	2	5.40541	0.0576185	Q9NSD9, Q9Y285	36	11	6510	32.8788	1	1	1
GOTERM_BP_DIRECT	GO:0030174~regulation of DNA-templated DNA replication initiation	2	5.40541	0.0626936	Q14566, P33991	36	12	6510	30.1389	1	1	1
GOTERM_BP_DIRECT	GO:0001676~long-chain fatty acid metabolic process	2	5.40541	0.0626936	Q9H845, Q86TX2	36	12	6510	30.1389	1	1	1
GOTERM_BP_DIRECT	GO:0006260~DNA replication	3	8.10811	0.0790923	Q14566, P24941, P33991	36	87	6510	6.23563	1	1	1
GOTERM_BP_DIRECT	GO:0015914~phospholipid transport	2	5.40541	0.08273	P22307, Q9BXB5	36	16	6510	22.6042	1	1	1
GOTERM_BP_DIRECT	GO:1903076~regulation of protein localization to plasma membrane	2	5.40541	0.0925915	Q13555, Q13554	36	18	6510	20.0926	1	1	1
GOTERM_MF_DIRECT	GO:0004300~enoyl-CoA hydratase activity	3	8.10811	0.000275429	P40939, P30084, P55084	37	5	6730	109.135	0.0431175	0.0329402	0.0325285
GOTERM_MF_DIRECT	GO:0003988~acetyl-CoA C-acyltransferase activity	3	8.10811	0.000411753	P22307, P40939, P55084	37	6	6730	90.9459	0.0637699	0.0329402	0.0325285
GOTERM_MF_DIRECT	GO:0005524~ATP binding	13	35.1351	0.00133302	Q13555, P54577, Q8TBX8, Q9NSD9, Q14566, Q13554, P14618, O95757, P33991, Q03426, Q99611, P24941, Q9Y285	37	873	6730	2.70858	0.192187	0.0710943	0.0702056
GOTERM_MF_DIRECT	GO:0015485~cholesterol binding	3	8.10811	0.00359756	P22307, Q9BXB5, O00204	37	17	6730	32.0986	0.438221	0.143902	0.142104
GOTERM_MF_DIRECT	GO:0004826~phenylalanine-tRNA ligase activity	2	5.40541	0.0212304	Q9NSD9, Q9Y285	37	4	6730	90.9459	0.967724	0.485265	0.479199
GOTERM_MF_DIRECT	GO:0003857~3-hydroxyacyl-CoA dehydrogenase activity	2	5.40541	0.0264691	P40939, P55084	37	5	6730	72.7568	0.986324	0.529382	0.522764
GOTERM_MF_DIRECT	GO:0003985~acetyl-CoA C-acetyltransferase activity	2	5.40541	0.0316806	P40939, P55084	37	6	6730	60.6306	0.994206	0.56321	0.55617
GOTERM_MF_DIRECT	GO:0036094~small molecule binding	2	5.40541	0.0420222	P54577, O00204	37	8	6730	45.473	0.99896	0.628703	0.620844
GOTERM_MF_DIRECT	GO:0000049~tRNA binding	3	8.10811	0.0455951	P54577, Q7L0Y3, Q9Y285	37	64	6730	8.52618	0.999428	0.628703	0.620844
GOTERM_MF_DIRECT	GO:0016747~acyltransferase activity, transferring groups other than amino-acyl groups	2	5.40541	0.0471527	P22307, P55084	37	9	6730	40.4204	0.99956	0.628703	0.620844
GOTERM_MF_DIRECT	GO:0004683~calcium/calmodulin-dependent protein kinase activity	2	5.40541	0.0623845	Q13555, Q13554	37	12	6730	30.3153	0.999967	0.651616	0.64347
GOTERM_MF_DIRECT	GO:0000062~fatty-acyl-CoA binding	2	5.40541	0.0623845	P22307, P40939	37	12	6730	30.3153	0.999967	0.651616	0.64347
GOTERM_MF_DIRECT	GO:0052689~carboxylic ester hydrolase activity	2	5.40541	0.0674089	O00748, Q86TX2	37	13	6730	27.9834	0.999986	0.651616	0.64347
GOTERM_MF_DIRECT	GO:0003697~single-stranded DNA binding	3	8.10811	0.0707827	P09429, Q14566, P33991	37	82	6730	6.65458	0.999992	0.651616	0.64347
GOTERM_MF_DIRECT	GO:0008289~lipid binding	3	8.10811	0.0738129	P22307, P09455, Q9BXB5	37	84	6730	6.49614	0.999995	0.651616	0.64347
GOTERM_MF_DIRECT	GO:0016491~oxidoreductase activity	3	8.10811	0.076885	P40939, Q16698, Q9NRG7	37	86	6730	6.34507	0.999997	0.651616	0.64347
GOTERM_MF_DIRECT	GO:0004812~aminoacyl-tRNA ligase activity	2	5.40541	0.0773794	P54577, Q9Y285	37	15	6730	24.2523	0.999997	0.651616	0.64347
