# Supplementary material for: A Two-Dimensional Peptide-Centric Stability Assay Maps Multidimensional Target Landscapes Unveiling 17β-Estradiol (E2)-GPX4 Binding-Induced Ferroptosis
Source: Research Square preprint supplement (doi:10.21203/rs.3.rs-6893001/v1), 2025-07-04
Supplement: Supplementary file 4 [file 366b77c87bdfdf80ca6e9e7f.xlsx]

## Sheet: parameter description
Supplementary Table 11: GO enrichment analysis in terms of biological process of E2-upregulated and downregulated proteins.
GO enrichment analysis were analyzed by the computation of DAVID software.
empirical Bayes moderated t-test was empoyed to filter E2-reguated proteins and proteins of p-value < 0.0001were set as E2-regulated proteins
The 6132 proteins quantified were set as the reference gene list.
BP	Biological Process
Count	Number of genes involved in the givern term.
%	Number of genes involved in given term is divided by the total number of user’s input genes.
p value	To examine the significance of gene–term enrichment with a modified Fisher’s exact test (EASE score).
Fold Enrichment	To measure the magnitude of enrichment. For example, 10% of user’s genes are kinases versus 1% of genes in human genome (this is population background) are kinases. Thus, the fold enrichment is tenfold. Fold enrichment along with EASE score could rank the enriched terms in a more comprehensive way.
Bonferroni	To globally correct enrichment p values to control family-wide false discovery rate under certain rate (e.g., r0.05). It is one of the multiple testing correction techniques (Bonferroni, Benjamini and FDR) provided by DAVID.
Benjamini
FDR	False discovery rate

## Sheet: E2-upreguated
Category	Term	Count	%	PValue	Genes	List Total	Pop Hits	Pop Total	Fold Enrichment	Bonferroni	Benjamini	FDR
GOTERM_BP_DIRECT	GO:0006695~cholesterol biosynthetic process	8	6.61157	2.5433e-07	Q03426, P53396, P38571, Q01581, P11413, P14324, P53602, Q13907	118	24	5932	16.7571	0.000204206	0.000203972	0.000202955
GOTERM_BP_DIRECT	GO:0043651~linoleic acid metabolic process	4	3.30579	7.26685e-05	O95864, O15296, Q9NYP7, O75342	118	5	5932	40.2169	0.056685	0.0291401	0.0289947
GOTERM_BP_DIRECT	GO:0006629~lipid metabolic process	9	7.43802	0.000190161	O95864, Q9NR19, P53396, P38571, O15296, P49327, Q01581, P11413, Q9NPA3	118	82	5932	5.51757	0.141625	0.0508364	0.0505828
GOTERM_BP_DIRECT	GO:0051289~protein homotetramerization	6	4.95868	0.000360362	P48163, Q13085, P04075, Q14749, P61769, Q9Y3Z3	118	32	5932	9.42585	0.251305	0.0520812	0.0518214
GOTERM_BP_DIRECT	GO:0006739~NADP metabolic process	4	3.30579	0.000389635	P48163, Q7Z4W1, O75874, P11413	118	8	5932	25.1356	0.268704	0.0520812	0.0518214
GOTERM_BP_DIRECT	GO:0008299~isoprenoid biosynthetic process	4	3.30579	0.000389635	Q03426, P14324, P53602, Q13907	118	8	5932	25.1356	0.268704	0.0520812	0.0518214
GOTERM_BP_DIRECT	GO:0001676~long-chain fatty acid metabolic process	4	3.30579	0.00232255	Q96CM8, O15296, O75342, P33121	118	14	5932	14.3632	0.84544	0.266098	0.264771
GOTERM_BP_DIRECT	GO:0006636~unsaturated fatty acid biosynthetic process	3	2.47934	0.00371011	O95864, O00767, Q9NYP7	118	5	5932	30.1627	0.949448	0.371938	0.370083
GOTERM_BP_DIRECT	GO:0055088~lipid homeostasis	4	3.30579	0.0049158	Q96AD5, Q8TB40, P38571, Q13085	118	18	5932	11.1714	0.980882	0.400529	0.398531
GOTERM_BP_DIRECT	GO:0051923~sulfation	3	2.47934	0.00549354	O00204, P50225	118	6	5932	25.1356	0.988007	0.400529	0.398531
GOTERM_BP_DIRECT	GO:0019886~antigen processing and presentation of exogenous peptide antigen via MHC class II	3	2.47934	0.00549354	P07339, P50570, P61769	118	6	5932	25.1356	0.988007	0.400529	0.398531
GOTERM_BP_DIRECT	GO:0006749~glutathione metabolic process	4	3.30579	0.00667365	O75874, P21266, P11413, O15217	118	20	5932	10.0542	0.995378	0.446022	0.443797
GOTERM_BP_DIRECT	GO:0050427~3'-phosphoadenosine 5'-phosphosulfate metabolic process	3	2.47934	0.00999295	O00204, P50225	118	8	5932	18.8517	0.999686	0.616488	0.613413
GOTERM_BP_DIRECT	GO:0006631~fatty acid metabolic process	5	4.13223	0.0114921	Q86V21, Q96CM8, P38571, P49327, P33121	118	45	5932	5.58569	0.999907	0.627628	0.624498
GOTERM_BP_DIRECT	GO:0006633~fatty acid biosynthetic process	4	3.30579	0.0125364	O95864, P53396, P49327, Q13085	118	25	5932	8.04339	0.99996	0.627628	0.624498
GOTERM_BP_DIRECT	GO:0034975~protein folding in endoplasmic reticulum	3	2.47934	0.0126835	P11021, P14625, P07237	118	9	5932	16.7571	0.999965	0.627628	0.624498
GOTERM_BP_DIRECT	GO:0016042~lipid catabolic process	4	3.30579	0.0154955	Q8TB40, P38571, P14555, Q8IV08	118	27	5932	7.44758	0.999996	0.627628	0.624498
GOTERM_BP_DIRECT	GO:0019915~lipid storage	3	2.47934	0.0156516	Q96AD5, P17900, Q99541	118	10	5932	15.0814	0.999997	0.627628	0.624498
GOTERM_BP_DIRECT	GO:0008202~steroid metabolic process	3	2.47934	0.0156516	P52895, O00204, P50225	118	10	5932	15.0814	0.999997	0.627628	0.624498
GOTERM_BP_DIRECT	GO:0006068~ethanol catabolic process	3	2.47934	0.0156516	Q9NR19, P50225	118	10	5932	15.0814	0.999997	0.627628	0.624498
GOTERM_BP_DIRECT	GO:0008610~lipid biosynthetic process	3	2.47934	0.0188854	Q9NR19, P53396, P33121	118	11	5932	13.7103	1	0.721243	0.717646
GOTERM_BP_DIRECT	GO:0006006~glucose metabolic process	4	3.30579	0.0357302	Q00796, Q7Z4W1, P38571, P11413	118	37	5932	5.43472	1	1	0.996255
GOTERM_BP_DIRECT	GO:0009308~amine metabolic process	2	1.65289	0.0390613	P50225	118	2	5932	50.2712	1	1	0.996255
GOTERM_BP_DIRECT	GO:0046473~phosphatidic acid metabolic process	2	1.65289	0.0390613	P14555, Q14693	118	2	5932	50.2712	1	1	0.996255
GOTERM_BP_DIRECT	GO:0034440~lipid oxidation	2	1.65289	0.0390613	O15296, O75342	118	2	5932	50.2712	1	1	0.996255
GOTERM_BP_DIRECT	GO:0046337~phosphatidylethanolamine metabolic process	2	1.65289	0.0390613	P14555, Q14693	118	2	5932	50.2712	1	1	0.996255
GOTERM_BP_DIRECT	GO:0006084~acetyl-CoA metabolic process	2	1.65289	0.0580208	Q01581, Q13085	118	3	5932	33.5141	1	1	0.996255
GOTERM_BP_DIRECT	GO:0010466~negative regulation of peptidase activity	2	1.65289	0.0580208	Q16610, P01034	118	3	5932	33.5141	1	1	0.996255
GOTERM_BP_DIRECT	GO:0019287~isopentenyl diphosphate biosynthetic process, mevalonate pathway	2	1.65289	0.0580208	Q03426, P53602	118	3	5932	33.5141	1	1	0.996255
GOTERM_BP_DIRECT	GO:0051122~hepoxilin biosynthetic process	2	1.65289	0.0580208	O15296, O75342	118	3	5932	33.5141	1	1	0.996255
GOTERM_BP_DIRECT	GO:0007586~digestion	2	1.65289	0.0580208	P52895, O00625	118	3	5932	33.5141	1	1	0.996255
GOTERM_BP_DIRECT	GO:0034976~response to endoplasmic reticulum stress	4	3.30579	0.0615308	P11021, P14625, Q9Y4L1, P07237	118	46	5932	4.37141	1	1	0.996255
GOTERM_BP_DIRECT	GO:0071456~cellular response to hypoxia	4	3.30579	0.0681803	P27144, Q92597, Q9Y4L1, P07237	118	48	5932	4.18927	1	1	0.996255
GOTERM_BP_DIRECT	GO:0014070~response to organic cyclic compound	3	2.47934	0.0689548	Q99541, P33121, P11413	118	22	5932	6.85516	1	1	0.996255
GOTERM_BP_DIRECT	GO:0010744~positive regulation of macrophage derived foam cell differentiation	2	1.65289	0.0766094	O15296, P14555	118	4	5932	25.1356	1	1	0.996255
GOTERM_BP_DIRECT	GO:0019372~lipoxygenase pathway	2	1.65289	0.0766094	O15296, O75342	118	4	5932	25.1356	1	1	0.996255
GOTERM_BP_DIRECT	GO:0003254~regulation of membrane depolarization	2	1.65289	0.0766094	Q96PU5, P61769	118	4	5932	25.1356	1	1	0.996255
GOTERM_BP_DIRECT	GO:0042159~lipoprotein catabolic process	2	1.65289	0.0766094	P07339, P38571	118	4	5932	25.1356	1	1	0.996255
GOTERM_BP_DIRECT	GO:0006690~icosanoid metabolic process	2	1.65289	0.0766094	O15296, O75342	118	4	5932	25.1356	1	1	0.996255
GOTERM_BP_DIRECT	GO:0045723~positive regulation of fatty acid biosynthetic process	2	1.65289	0.0766094	Q9NYP7, Q9NPA3	118	4	5932	25.1356	1	1	0.996255
GOTERM_BP_DIRECT	GO:0001580~detection of chemical stimulus involved in sensory perception of bitter taste	2	1.65289	0.0766094	P12273, P25311	118	4	5932	25.1356	1	1	0.996255
GOTERM_BP_DIRECT	GO:0019432~triglyceride biosynthetic process	2	1.65289	0.0948342	P33121, Q14693	118	5	5932	20.1085	1	1	0.996255
GOTERM_BP_DIRECT	GO:0019509~L-methionine salvage from methylthioadenosine	2	1.65289	0.0948342	Q9BV20, Q9BV57	118	5	5932	20.1085	1	1	0.996255
GOTERM_BP_DIRECT	GO:0019640~D-glucuronate catabolic process to D-xylulose 5-phosphate	2	1.65289	0.0948342	Q00796, Q7Z4W1	118	5	5932	20.1085	1	1	0.996255
GOTERM_BP_DIRECT	GO:0046949~fatty-acyl-CoA biosynthetic process	2	1.65289	0.0948342	P49327, Q13085	118	5	5932	20.1085	1	1	0.996255
GOTERM_BP_DIRECT	GO:0006555~methionine metabolic process	2	1.65289	0.0948342	Q9BV57, Q14749	118	5	5932	20.1085	1	1	0.996255
GOTERM_BP_DIRECT	GO:0008210~estrogen metabolic process	2	1.65289	0.0948342	P50225	118	5	5932	20.1085	1	1	0.996255
GOTERM_BP_DIRECT	GO:0009812~flavonoid metabolic process	2	1.65289	0.0948342	P50225	118	5	5932	20.1085	1	1	0.996255
GOTERM_BP_DIRECT	GO:0030224~monocyte differentiation	2	1.65289	0.0948342	O00625, P49327	118	5	5932	20.1085	1	1	0.996255
GOTERM_BP_DIRECT	GO:0048488~synaptic vesicle endocytosis	3	2.47934	0.0983969	P17655, Q9BY11, P50570	118	27	5932	5.58569	1	1	0.996255
GOTERM_BP_DIRECT	GO:0006805~xenobiotic metabolic process	3	2.47934	0.0983969	P50225, O15217	118	27	5932	5.58569	1	1	0.996255
GOTERM_BP_DIRECT	GO:0120162~positive regulation of cold-induced thermogenesis	3	2.47934	0.0983969	O00767, P33121, Q14693	118	27	5932	5.58569	1	1	0.996255

## Sheet: E2-downregulated
Category	Term	Count	%	PValue	Genes	List Total	Pop Hits	Pop Total	Fold Enrichment	Bonferroni	Benjamini	FDR
GOTERM_BP_DIRECT	GO:0006260~DNA replication	25	23.1481	4.04577e-24	Q14566, P33316, P28340, P33992, P33991, Q96E14, P18858, Q15004, P56282, P49736, P0CG13, P40938, P40937, Q07864, P39748, Q9Y5N6, O75792, P35249, P35250, Q9H9A7, Q14181, P24941, P06493, P49005, Q9NRF9	106	80	5932	17.4882	2.77945e-21	2.7754e-21	2.6783e-21
GOTERM_BP_DIRECT	GO:0051301~cell division	26	24.0741	3.19882e-13	Q13257, Q9H900, P33552, P33992, Q9BPX3, P14635, O00762, P18858, P61024, Q86XI2, Q99661, Q9UNS1, Q9Y6A5, O14965, Q9BZD4, Q9NRZ9, O95067, Q9H410, Q9NTJ3, P24941, P06493, Q9HBM1, P42695, Q96GD4, Q96BD8, Q9BW19	106	243	5932	5.98773	2.19741e-10	1.09719e-10	1.05881e-10
GOTERM_BP_DIRECT	GO:0006270~DNA replication initiation	10	9.25926	2.97236e-11	O75419, Q14566, P49642, Q14181, P33992, Q9Y5N6, P25205, P49643, P33991, P49736	106	21	5932	26.6487	2.04202e-08	6.7968e-09	6.55901e-09
GOTERM_BP_DIRECT	GO:0006261~DNA-templated DNA replication	10	9.25926	2.93587e-10	P35250, P40938, P40937, P28340, Q07864, P49005, P56282, Q9NR33, P35249, Q9NRF9	106	26	5932	21.5239	2.01694e-07	5.03501e-08	4.85886e-08
GOTERM_BP_DIRECT	GO:0032508~DNA duplex unwinding	12	11.1111	1.59732e-09	Q12873, P35250, P0CG13, P40938, P40937, Q9Y620, P04083, P33992, P25205, P33991, P35249, P49736	106	54	5932	12.4361	1.09736e-06	2.19153e-07	2.11486e-07
GOTERM_BP_DIRECT	GO:0006281~DNA repair	18	16.6667	1.93202e-08	Q14527, P40938, P40937, P28340, Q07864, P39748, P35249, Q96E14, P35250, P18858, P24941, Q92466, P06493, P23921, Q15004, Q9UNS1, P56282, Q9NPD8	106	186	5932	5.4157	1.32729e-05	2.20894e-06	2.13166e-06
GOTERM_BP_DIRECT	GO:1900264~positive regulation of DNA-directed DNA polymerase activity	6	5.55556	8.48111e-08	P35250, P0CG13, P40938, P40937, P35249, P12004	106	8	5932	41.9717	5.82635e-05	8.31148e-06	8.0207e-06
GOTERM_BP_DIRECT	GO:0071897~DNA biosynthetic process	7	6.48148	5.99796e-07	P18858, P28340, P04183, P49005, P04818, Q9NR33, Q9NRF9	106	19	5932	20.6177	0.000411975	5.11163e-05	4.9328e-05
GOTERM_BP_DIRECT	GO:0000727~double-strand break repair via break-induced replication	6	5.55556	6.70622e-07	O75419, Q14566, P33992, P25205, P33991, P49736	106	11	5932	30.5249	0.000460611	5.11163e-05	4.9328e-05
GOTERM_BP_DIRECT	GO:0006271~DNA strand elongation involved in DNA replication	5	4.62963	6.14565e-06	P40938, P25205, P49005, P33991, P35249	106	8	5932	34.9764	0.00421317	0.000421591	0.000406842
GOTERM_BP_DIRECT	GO:0006268~DNA unwinding involved in DNA replication	6	5.55556	1.12661e-05	O75419, Q14566, P33992, P25205, P33991, P49736	106	18	5932	18.6541	0.00770998	0.000702595	0.000678015
GOTERM_BP_DIRECT	GO:0030174~regulation of DNA-templated DNA replication initiation	5	4.62963	1.79387e-05	Q14566, P33992, P25205, P33991, P49736	106	10	5932	27.9811	0.0122484	0.0010255	0.000989621
GOTERM_BP_DIRECT	GO:0051256~mitotic spindle midzone assembly	4	3.7037	5.25291e-05	Q9H0H5, O95239, Q02241, Q96GD4	106	5	5932	44.7698	0.035445	0.00277192	0.00267495
GOTERM_BP_DIRECT	GO:0006287~base-excision repair, gap-filling	5	4.62963	5.86211e-05	P18858, P28340, Q07864, P39748, P12004	106	13	5932	21.5239	0.0394736	0.00287243	0.00277194
GOTERM_BP_DIRECT	GO:0007052~mitotic spindle organization	7	6.48148	0.000108978	O95239, Q9BZD4, P14635, Q9HBM1, Q9Y6A5, Q96GD4, O14965	106	44	5932	8.90309	0.0721377	0.00481246	0.0046441
GOTERM_BP_DIRECT	GO:0000070~mitotic sister chromatid segregation	6	5.55556	0.000112244	Q13257, Q86XI2, Q9NTJ3, Q96BD8, Q9BW19, Q9H410	106	28	5932	11.9919	0.0742175	0.00481246	0.0046441
GOTERM_BP_DIRECT	GO:0044772~mitotic cell cycle phase transition	4	3.7037	0.000282948	P61024, P33552, P14635, O95067	106	8	5932	27.9811	0.176682	0.0114178	0.0110183
GOTERM_BP_DIRECT	GO:0032355~response to estradiol	6	5.55556	0.000336016	O95983, P36969, P04083, P18075, P12004	106	35	5932	9.59353	0.206167	0.012806	0.0123579
GOTERM_BP_DIRECT	GO:1905821~positive regulation of chromosome condensation	4	3.7037	0.000418966	Q86XI2, Q9NTJ3, Q9BPX3, P42695	106	9	5932	24.8721	0.250156	0.0151269	0.0145976
GOTERM_BP_DIRECT	GO:1905820~positive regulation of chromosome separation	4	3.7037	0.000590834	Q86XI2, Q9NTJ3, Q9BPX3, P42695	106	10	5932	22.3849	0.333705	0.0202656	0.0195566
GOTERM_BP_DIRECT	GO:0000731~DNA synthesis involved in DNA repair	4	3.7037	0.00080197	P40938, P28340, Q07864, P23921	106	11	5932	20.3499	0.423727	0.0261977	0.0252811
GOTERM_BP_DIRECT	GO:2000121~regulation of removal of superoxide radicals	3	2.77778	0.000920357	P18075, P00374	106	3	5932	55.9623	0.468779	0.0286984	0.0276944
GOTERM_BP_DIRECT	GO:0007094~mitotic spindle assembly checkpoint signaling	5	4.62963	0.00102668	Q15645, Q13257, Q9H900, Q9BZD4, Q9HBM1	106	26	5932	10.762	0.506232	0.0306218	0.0295504
GOTERM_BP_DIRECT	GO:0051984~positive regulation of chromosome segregation	4	3.7037	0.00135467	Q86XI2, Q9NTJ3, Q9BPX3, P42695	106	13	5932	17.2192	0.605954	0.0387209	0.0373662
GOTERM_BP_DIRECT	GO:0006272~leading strand elongation	3	2.77778	0.00181943	Q07864, P12004, Q9NRF9	106	4	5932	41.9717	0.713806	0.0499251	0.0481785
GOTERM_BP_DIRECT	GO:0051000~positive regulation of nitric-oxide synthase activity	3	2.77778	0.00299736	P17342, P00374	106	5	5932	33.5774	0.872836	0.0761552	0.0734909
GOTERM_BP_DIRECT	GO:1902975~mitotic DNA replication initiation	3	2.77778	0.00299736	P25205, P33991, P49736	106	5	5932	33.5774	0.872836	0.0761552	0.0734909
GOTERM_BP_DIRECT	GO:0006269~DNA replication, synthesis of primer	3	2.77778	0.00444419	P49642, Q14181, P49643	106	6	5932	27.9811	0.953111	0.108883	0.105073
GOTERM_BP_DIRECT	GO:0000082~G1/S transition of mitotic cell cycle	5	4.62963	0.00473659	Q07864, P24941, P06493, P14635, O95067	106	39	5932	7.17465	0.96168	0.112045	0.108125
GOTERM_BP_DIRECT	GO:0006284~base-excision repair	4	3.7037	0.00649783	P18858, P13051, P39748, P78549	106	22	5932	10.175	0.98865	0.148584	0.143386
GOTERM_BP_DIRECT	GO:0034644~cellular response to UV	5	4.62963	0.00673363	Q96KB5, P28340, Q92466, Q96GD4, P12004	106	43	5932	6.50724	0.990358	0.149009	0.143796
GOTERM_BP_DIRECT	GO:0007411~axon guidance	5	4.62963	0.00992623	Q8WX93, Q96PX9, P18075, Q13308, Q15223	106	48	5932	5.8294	0.998944	0.212794	0.205349
GOTERM_BP_DIRECT	GO:0000281~mitotic cytokinesis	5	4.62963	0.0106644	Q9H0H5, Q8WWK9, O95239, Q02241, Q96GD4	106	49	5932	5.71044	0.999367	0.22169	0.213934
GOTERM_BP_DIRECT	GO:0006139~nucleobase-containing compound metabolic process	4	3.7037	0.0115779	P33316, P04183, P33992, Q99808	106	27	5932	8.29071	0.999665	0.233602	0.225429
GOTERM_BP_DIRECT	GO:0034501~protein localization to kinetochore	3	2.77778	0.0153808	Q9H900, P06493, Q96GD4	106	11	5932	15.2624	0.999976	0.301464	0.290917
GOTERM_BP_DIRECT	GO:0140588~chromatin looping	7	6.48148	0.0177779	Q12873, Q14566, P33992, P25205, P33991, Q6PIW4, P49736	106	118	5932	3.3198	0.999996	0.338288	0.326453
GOTERM_BP_DIRECT	GO:0051315~attachment of mitotic spindle microtubules to kinetochore	3	2.77778	0.0182458	Q99661, Q9BZD4, Q96BD8	106	12	5932	13.9906	0.999997	0.338288	0.326453
GOTERM_BP_DIRECT	GO:0000086~G2/M transition of mitotic cell cycle	4	3.7037	0.0200097	P24941, P06493, P14635, O14965	106	33	5932	6.7833	0.999999	0.356669	0.344191
GOTERM_BP_DIRECT	GO:0007076~mitotic chromosome condensation	3	2.77778	0.021317	Q9NTJ3, Q9BPX3, P42695	106	13	5932	12.9144	1	0.356669	0.344191
GOTERM_BP_DIRECT	GO:0008608~attachment of spindle microtubules to kinetochore	3	2.77778	0.021317	Q9BZD4, Q9HBM1, Q9H410	106	13	5932	12.9144	1	0.356669	0.344191
GOTERM_BP_DIRECT	GO:0007051~spindle organization	3	2.77778	0.021317	Q12873, Q96GD4, O14965	106	13	5932	12.9144	1	0.356669	0.344191
GOTERM_BP_DIRECT	GO:0007080~mitotic metaphase chromosome alignment	4	3.7037	0.0234028	Q99661, P14635, Q96BD8, Q9BW19	106	35	5932	6.39569	1	0.382245	0.368872
GOTERM_BP_DIRECT	GO:0042659~regulation of cell fate specification	3	2.77778	0.0245861	Q12873, O95983	106	14	5932	11.9919	1	0.392234	0.378512
GOTERM_BP_DIRECT	GO:0097421~liver regeneration	3	2.77778	0.0280455	P04818, P12004, O14965	106	15	5932	11.1925	1	0.415048	0.400528
GOTERM_BP_DIRECT	GO:0032467~positive regulation of cytokinesis	3	2.77778	0.0280455	Q9H0H5, Q02241, Q96GD4	106	15	5932	11.1925	1	0.415048	0.400528
GOTERM_BP_DIRECT	GO:0045740~positive regulation of DNA replication	3	2.77778	0.0280455	P24941, P06493, P12004	106	15	5932	11.1925	1	0.415048	0.400528
GOTERM_BP_DIRECT	GO:0007059~chromosome segregation	5	4.62963	0.028904	Q99661, Q9BZD4, Q9HBM1, Q96BD8, Q9H410	106	66	5932	4.23957	1	0.415048	0.400528
GOTERM_BP_DIRECT	GO:0007018~microtubule-based movement	4	3.7037	0.0290413	Q99661, O95239, Q02241, Q9BW19	106	38	5932	5.89076	1	0.415048	0.400528
GOTERM_BP_DIRECT	GO:0043137~DNA replication, removal of RNA primer	2	1.85185	0.0350908	P39748, O75792	106	2	5932	55.9623	1	0.47757	0.460862
GOTERM_BP_DIRECT	GO:0031427~response to methotrexate	2	1.85185	0.0350908	P00374	106	2	5932	55.9623	1	0.47757	0.460862
GOTERM_BP_DIRECT	GO:2000736~regulation of stem cell differentiation	3	2.77778	0.0355045	Q12873, O95983	106	17	5932	9.87569	1	0.47757	0.460862
GOTERM_BP_DIRECT	GO:0006730~one-carbon metabolic process	3	2.77778	0.0394895	P35219, P00374	106	18	5932	9.32704	1	0.497122	0.47973
GOTERM_BP_DIRECT	GO:1900087~positive regulation of G1/S transition of mitotic cell cycle	3	2.77778	0.0394895	P04083, P31350, P23921	106	18	5932	9.32704	1	0.497122	0.47973
GOTERM_BP_DIRECT	GO:0048144~fibroblast proliferation	3	2.77778	0.0436355	P61024, P33552, P06493	106	19	5932	8.83615	1	0.497122	0.47973
GOTERM_BP_DIRECT	GO:0006346~DNA methylation-dependent constitutive heterochromatin formation	3	2.77778	0.0436355	O95983, Q9NRZ9	106	19	5932	8.83615	1	0.497122	0.47973
GOTERM_BP_DIRECT	GO:0006298~mismatch repair	3	2.77778	0.0436355	P18858, O75792, P12004	106	19	5932	8.83615	1	0.497122	0.47973
GOTERM_BP_DIRECT	GO:0010971~positive regulation of G2/M transition of mitotic cell cycle	3	2.77778	0.0436355	P06493, P23921, P14635	106	19	5932	8.83615	1	0.497122	0.47973
GOTERM_BP_DIRECT	GO:0048568~embryonic organ development	3	2.77778	0.0479355	O95983, Q07864	106	20	5932	8.39434	1	0.497122	0.47973
GOTERM_BP_DIRECT	GO:0006297~nucleotide-excision repair, DNA gap filling	2	1.85185	0.0521761	P28340, Q07864	106	3	5932	37.3082	1	0.497122	0.47973
GOTERM_BP_DIRECT	GO:1905448~positive regulation of mitochondrial ATP synthesis coupled electron transport	2	1.85185	0.0521761	P06493, P14635	106	3	5932	37.3082	1	0.497122	0.47973
GOTERM_BP_DIRECT	GO:0046683~response to organophosphorus	2	1.85185	0.0521761	P40938, P04818	106	3	5932	37.3082	1	0.497122	0.47973
GOTERM_BP_DIRECT	GO:0007057~spindle assembly involved in female meiosis I	2	1.85185	0.0521761	O95067, O14965	106	3	5932	37.3082	1	0.497122	0.47973
GOTERM_BP_DIRECT	GO:0071139~resolution of DNA recombination intermediates	2	1.85185	0.0521761	Q9H9A7, Q96E14	106	3	5932	37.3082	1	0.497122	0.47973
GOTERM_BP_DIRECT	GO:0090103~cochlea morphogenesis	2	1.85185	0.0521761	Q13308, Q15223	106	3	5932	37.3082	1	0.497122	0.47973
GOTERM_BP_DIRECT	GO:0009265~2'-deoxyribonucleotide biosynthetic process	2	1.85185	0.0521761	P31350, P23921	106	3	5932	37.3082	1	0.497122	0.47973
GOTERM_BP_DIRECT	GO:0009185~ribonucleoside diphosphate metabolic process	2	1.85185	0.0521761	P31350, P23921	106	3	5932	37.3082	1	0.497122	0.47973
GOTERM_BP_DIRECT	GO:0046105~thymidine biosynthetic process	2	1.85185	0.0521761	P04183, P00374	106	3	5932	37.3082	1	0.497122	0.47973
GOTERM_BP_DIRECT	GO:0009263~deoxyribonucleotide biosynthetic process	2	1.85185	0.0521761	P31350, P23921	106	3	5932	37.3082	1	0.497122	0.47973
GOTERM_BP_DIRECT	GO:0045004~DNA replication proofreading	2	1.85185	0.0521761	P28340, Q07864	106	3	5932	37.3082	1	0.497122	0.47973
GOTERM_BP_DIRECT	GO:1902850~microtubule cytoskeleton organization involved in mitosis	2	1.85185	0.0521761	P06493, Q9Y6A5	106	3	5932	37.3082	1	0.497122	0.47973
GOTERM_BP_DIRECT	GO:0062033~positive regulation of mitotic sister chromatid segregation	2	1.85185	0.0521761	P06493, Q96GD4	106	3	5932	37.3082	1	0.497122	0.47973
GOTERM_BP_DIRECT	GO:0046452~dihydrofolate metabolic process	2	1.85185	0.0521761	P00374	106	3	5932	37.3082	1	0.497122	0.47973
GOTERM_BP_DIRECT	GO:0007156~homophilic cell adhesion via plasma membrane adhesion molecules	3	2.77778	0.0569716	Q8WX93, Q13308, Q15223	106	22	5932	7.63122	1	0.528142	0.509665
GOTERM_BP_DIRECT	GO:0007098~centrosome cycle	3	2.77778	0.0569716	Q12873, P06493, Q15004	106	22	5932	7.63122	1	0.528142	0.509665
GOTERM_BP_DIRECT	GO:0045132~meiotic chromosome segregation	2	1.85185	0.0689616	Q9NTJ3, Q9BZD4	106	4	5932	27.9811	1	0.614385	0.592891
GOTERM_BP_DIRECT	GO:0046654~tetrahydrofolate biosynthetic process	2	1.85185	0.0689616	P00374	106	4	5932	27.9811	1	0.614385	0.592891
GOTERM_BP_DIRECT	GO:0006231~dTMP biosynthetic process	2	1.85185	0.0689616	P33316, P04818	106	4	5932	27.9811	1	0.614385	0.592891
GOTERM_BP_DIRECT	GO:0000278~mitotic cell cycle	5	4.62963	0.0746498	Q96KB5, Q07864, Q96GD4, Q96BD8, O14965	106	90	5932	3.10901	1	0.656536	0.633567
GOTERM_BP_DIRECT	GO:0009411~response to UV	3	2.77778	0.0818155	P28340, Q92466, Q15004	106	27	5932	6.21803	1	0.710448	0.685593
GOTERM_BP_DIRECT	GO:0042276~error-prone translesion synthesis	2	1.85185	0.0854527	P49005, P56282	106	5	5932	22.3849	1	0.732757	0.707121
GOTERM_BP_DIRECT	GO:0000724~double-strand break repair via homologous recombination	4	3.7037	0.0894677	Q9H9A7, Q9Y620, P39748, Q96E14	106	60	5932	3.73082	1	0.757714	0.731205
GOTERM_BP_DIRECT	GO:0001501~skeletal system development	3	2.77778	0.0925334	P17342, P18075, Q9UHF7	106	29	5932	5.7892	1	0.774121	0.747038
GOTERM_BP_DIRECT	GO:0008584~male gonad development	3	2.77778	0.098038	P56159, Q9HBE1, P23921	106	30	5932	5.59623	1	0.801551	0.773508
