# Supplementary material for: A Two-Dimensional Peptide-Centric Stability Assay Maps Multidimensional Target Landscapes Unveiling 17β-Estradiol (E2)-GPX4 Binding-Induced Ferroptosis
Source: Research Square preprint supplement (doi:10.21203/rs.3.rs-6893001/v1), 2025-07-04
Supplement: Supplementary file 5 [file 3cf16b67326466328d46216b.xlsx]

## Sheet: parameter description
Supplementary Table 14
This file lists kinase proteins as staurosporine (STU) true positive targets
Tab descriptions
A	KinHub	Uniprot.ID mapped to human kinases @ http://kinhub.org/kinases.html
B	Uniprot	Uniprot.ID mapped to human kinases @ https://www.uniprot.org/ identifed as part of human, reviewed kinase family

## Sheet: A KinHub
xName	Manning Name	HGNC Name	Kinase Name	Group	Family	SubFamily	UniprotID
smMLCK	smMLCK	MYLK	Myosin light chain kinase	CAMK	MLCK		Q15746
skMLCK	skMLCK	MYLK2	Myosin light chain kinase 2	CAMK	MLCK		Q9H1R3
p70S6Kb	p70S6Kb	RPS6KB2	Ribosomal protein S6 kinase beta-2	AGC	RSK	RSKp70	Q9UBS0
p70S6K	p70S6K	RPS6KB1	Ribosomal protein S6 kinase beta-1	AGC	RSK	RSKp70	P23443
p38g	p38g	MAPK12	Mitogen-activated protein kinase 12	CMGC	MAPK	p38	P53778
p38d	p38d	MAPK13	Mitogen-activated protein kinase 13	CMGC	MAPK	p38	O15264
p38b	p38b	MAPK11	Mitogen-activated protein kinase 11	CMGC	MAPK	p38	Q15759
p38a	p38a	MAPK14	Mitogen-activated protein kinase 14	CMGC	MAPK	p38	Q16539
eEF2K	eEF2K	EEF2K	Eukaryotic elongation factor 2 kinase	Atypical	Alpha	eEF2K	O00418
caMLCK	caMLCK	MYLK3	Myosin light chain kinase 3	CAMK	MLCK		Q32MK0
ZAP70	ZAP70	ZAP70	Tyrosine-protein kinase ZAP-70	TK	Syk		P43403
ZAK	ZAK		Mitogen-activated protein kinase kinase kinase MLT	TKL	MLK	ZAK	Q9NYL2
YSK1	YSK1	STK25	Serine/threonine-protein kinase 25	STE	STE20	YSK	O00506
YES	YES	YES1	Tyrosine-protein kinase Yes	TK	Src		P07947
YANK3	YANK3	STK32C	Serine/threonine-protein kinase 32C	AGC	YANK		Q86UX6
YANK2	YANK2	STK32B	Serine/threonine-protein kinase 32B	AGC	YANK		Q9NY57
YANK1	YANK1	STK32A	Serine/threonine-protein kinase 32A	AGC	YANK		Q8WU08
Wnk4	Wnk4	WNK4	Serine/threonine-protein kinase WNK4	Other	WNK		Q96J92
Wnk3	Wnk3	WNK3	Serine/threonine-protein kinase WNK3	Other	WNK		Q9BYP7
Wnk2	Wnk2	WNK2	Serine/threonine-protein kinase WNK2	Other	WNK		Q9Y3S1
Wnk1	Wnk1	WNK1	Serine/threonine-protein kinase WNK1	Other	WNK		Q9H4A3
Wee1B	Wee1B	WEE2	Wee1-like protein kinase 2	Other	WEE		P0C1S8
Wee1	Wee1	WEE1	Wee1-like protein kinase	Other	WEE		P30291
VRK3	VRK3	VRK3	Inactive serine/threonine-protein kinase VRK3	CK1	VRK		Q8IV63
VRK2	VRK2	VRK2	Serine/threonine-protein kinase VRK2	CK1	VRK		Q86Y07
VRK1	VRK1	VRK1	Serine/threonine-protein kinase VRK1	CK1	VRK		Q99986
VACAMKL	VACAMKL	CAMKV	CaM kinase-like vesicle-associated protein	CAMK	CAMK-Unique		Q8NCB2
ULK4	ULK4	ULK4	Serine/threonine-protein kinase ULK4	Other	ULK		Q96C45
ULK3	ULK3	ULK3	Serine/threonine-protein kinase ULK3	Other	ULK		Q6PHR2
ULK2	ULK2	ULK2	Serine/threonine-protein kinase ULK2	Other	ULK		Q8IYT8
ULK1	ULK1	ULK1	Serine/threonine-protein kinase ULK1	Other	ULK		O75385
Trio	Trio	TRIO	Triple functional domain protein	CAMK	Trio		O75962
Trb3	Trb3	TRIB3	Tribbles homolog 3	CAMK	Trbl		Q96RU7
Trb2	Trb2	TRIB2	Tribbles homolog 2	CAMK	Trbl		Q92519
Trb1	Trb1	TRIB1	Tribbles homolog 1	CAMK	Trbl		Q96RU8
Trad	Trad	KALRN	HCG2039851	CAMK	Trio		O60229
TYRO3	TYRO3	TYRO3	Tyrosine-protein kinase receptor TYRO3	TK	Axl		Q06418
TYK2_b	Domain2_TYK2	TYK2	Non-receptor tyrosine-protein kinase TYK2	TK	JakB		P29597
TYK2	TYK2	TYK2	Non-receptor tyrosine-protein kinase TYK2	TK	Jak		P29597
TXK	TXK	TXK	Tyrosine-protein kinase TXK	TK	Tec		P42681
TTN	TTN	TTN	Titin	CAMK	MLCK		Q8WZ42
TTK	TTK	TTK	Dual specificity protein kinase TTK	Other	TTK		P33981
TTBK2	TTBK2	TTBK2	Tau-tubulin kinase 2	CK1	TTBK		Q6IQ55
TTBK1	TTBK1	TTBK1	Tau-tubulin kinase 1	CK1	TTBK		Q5TCY1
TSSK4	TSSK4	TSSK4	Testis-specific serine/threonine-protein kinase 4	CAMK	TSSK		Q6SA08
TSSK3	TSSK3	TSSK3	Testis-specific serine/threonine-protein kinase 3	CAMK	TSSK		Q96PN8
TSSK2	TSSK2	TSSK2	Testis-specific serine/threonine-protein kinase 2	CAMK	TSSK		Q96PF2
TSSK1	TSSK1	TSSK1B	Testis-specific serine/threonine-protein kinase 1	CAMK	TSSK		Q9BXA7
TRRAP	TRRAP	TRRAP	Transformation/transcription domain-associated protein	Atypical	PIKK	TRRAP	Q9Y4A5
TRKC	TRKC	NTRK3	NT-3 growth factor receptor	TK	Trk		Q16288
TRKB	TRKB	NTRK2	BDNF/NT-3 growth factors receptor	TK	Trk		Q16620
TRKA	TRKA	NTRK1	High affinity nerve growth factor receptor	TK	Trk		P04629
TNK1	TNK1	TNK1	Non-receptor tyrosine-protein kinase TNK1	TK	Ack		Q13470
TNIK	ZC2/TNIK	TNIK	TRAF2 and NCK-interacting protein kinase	STE	STE20	MSN	Q9UKE5
TLK2	TLK2	TLK2	Serine/threonine-protein kinase tousled-like 2	Other	TLK		Q86UE8
TLK1	TLK1	TLK1	Serine/threonine-protein kinase tousled-like 1	Other	TLK		Q9UKI8
TIF1g	TIF1g	TRIM33	E3 ubiquitin-protein ligase TRIM33	Atypical	TIF1		Q9UPN9
TIF1b	TIF1b	TRIM28	Transcription intermediary factor 1-beta	Atypical	TIF1		Q13263
TIF1a	TIF1a	TRIM24	Transcription intermediary factor 1-alpha	Atypical	TIF1		O15164
TIF1D	TIF1D	TRIM66	Tripartite motif-containing protein 66	Atypical	TIF1		B5MCJ9
TIE2	TIE2	TEK	Angiopoietin-1 receptor	TK	Tie		Q02763
TIE1	TIE1	TIE1	Tyrosine-protein kinase receptor Tie-1	TK	Tie		P35590
TGFbR2	TGFbR2	TGFBR2	TGF-beta receptor type-2	TKL	STKR	STKR2	P37173
TGFbR1	TGFbR1	TGFBR1	TGF-beta receptor type-1	TKL	STKR	STKR1	P36897
TESK2	TESK2	TESK2	Dual-specificity testis-specific protein kinase 2	TKL	LISK	TESK	Q96S53
TESK1	TESK1	TESK1	Dual specificity testis-specific protein kinase 1	TKL	LISK	TESK	Q15569
TEC	TEC	TEC	Tyrosine-protein kinase Tec	TK	Tec		P42680
TBK1	TBK1	TBK1	Serine/threonine-protein kinase TBK1	Other	IKK		Q9UHD2
TBCK	TBCK	TBCK	TBC domain-containing protein kinase-like protein	Other	TBCK		Q8TEA7
TAO3	TAO3	TAOK3	Serine/threonine-protein kinase TAO3	STE	STE20	TAO	Q9H2K8
TAO2	TAO2	TAOK2	Serine/threonine-protein kinase TAO2	STE	STE20	TAO	Q9UL54
TAO1	TAO1	TAOK1	Serine/threonine-protein kinase TAO1	STE	STE20	TAO	Q7L7X3
TAK1	TAK1	MAP3K7	Mitogen-activated protein kinase kinase kinase 7	TKL	MLK	TAK1	O43318
TAF1L	TAF1L	TAF1L	Transcription initiation factor TFIID subunit 1-like	Atypical	TAF1		Q8IZX4
TAF1	TAF1	TAF1	Transcription initiation factor TFIID subunit 1	Atypical	TAF1		P21675
SuRTK106	SuRTK106	STYK1	Tyrosine-protein kinase STYK1	TK	TK-Unique		Q6J9G0
Slob	Slob	PXK	PX domain-containing protein kinase-like protein	Other	Slob		Q7Z7A4
SgK496	SgK496	DSTYK	Dual serine/threonine and tyrosine protein kinase	Other	Dusty		Q6XUX3
SgK495	SgK495	STK40	Serine/threonine-protein kinase 40	CAMK	SgK495		Q8N2I9
SgK494	SgK494		Uncharacterized serine/threonine-protein kinase SgK494	AGC	RSKR		Q96LW2
SgK493	SgK493	PKDCC	Protein kinase domain-containing protein	Other	SgK493		Q504Y2
SgK424	SgK424	TEX14	Inactive serine/threonine-protein kinase TEX14	Other	NKF5		Q8IWB6
SgK396	SgK396	STK31	Serine/threonine-protein kinase 31	Other	Other-Unique		Q9BXU1
SgK307	SgK307	TEX14	Inactive serine/threonine-protein kinase TEX14	Other	NKF5		Q8IWB6
SgK288	SgK288	ANKK1	Ankyrin repeat and protein kinase domain-containing protein 1	TKL	RIPK		Q8NFD2
SgK269	SgK269	PEAK1	Pseudopodium-enriched atypical kinase 1	Other	NKF3		Q9H792
SgK223	SgK223		Tyrosine-protein kinase SgK223	Other	NKF3		Q86YV5
SgK196	SgK196	POMK	Protein kinase-like protein SgK196	Other	Other-Unique		Q9H5K3
SgK110	SgK110	SBK3	Putative uncharacterized serine/threonine-protein kinase SgK110	Other	NKF1		P0C264
SgK085	SgK085	MYLK4	Myosin light chain kinase family member 4	CAMK	MLCK		Q86YV6
SgK071	SgK071	STKLD1	Protein kinase-like protein SgK071	Other	SgK071		Q8NE28
SgK069	SgK069	SBK2	Serine/threonine-protein kinase SBK2	Other	NKF1		P0C263
SYK	SYK	SYK	Tyrosine-protein kinase SYK	TK	Syk		P43405
STLK6	STLK6	STRADB	STE20-related kinase adapter protein beta	STE	STE20	STLK	Q9C0K7
STLK5	STLK5	STRADA	STE20-related kinase adapter protein alpha	STE	STE20	STLK	Q7RTN6
STLK3	STLK3	STK39	STE20/SPS1-related proline-alanine-rich protein kinase	STE	STE20	FRAY	Q9UEW8
STK33	STK33	STK33	Serine/threonine-protein kinase 33	CAMK	STK33		Q9BYT3
SSTK	SSTK	TSSK6	Testis-specific serine/threonine-protein kinase 6	CAMK	TSSK		Q9BXA6
SRPK2	SRPK2	SRPK2	SRSF protein kinase 2	CMGC	SRPK		P78362
SRPK1	SRPK1	SRPK1	SRSF protein kinase 1	CMGC	SRPK		Q96SB4
SRM	SRM	SRMS	Tyrosine-protein kinase Srms	TK	Src		Q9H3Y6
SRC	SRC	SRC	Proto-oncogene tyrosine-protein kinase Src	TK	Src		P12931
SPEG_b	Domain2_SPEG	SPEG	Striated muscle preferentially expressed protein kinase	CAMK	Trio		Q15772
SPEG	SPEG	SPEG	Striated muscle preferentially expressed protein kinase	CAMK	Trio		Q15772
SNRK	SNRK	SNRK	SNF-related serine/threonine-protein kinase	CAMK	CAMKL	SNRK	Q9NRH2
SMG1	SMG1	SMG1	Serine/threonine-protein kinase SMG1	Atypical	PIKK	SMG1	Q96Q15
SLK	SLK	SLK	STE20-like serine/threonine-protein kinase	STE	STE20	SLK	Q9H2G2
SIK	SIK	SIK1	Serine/threonine-protein kinase SIK1	CAMK	CAMKL	QIK	P57059
SGK3	SGK3	SGK3	Serine/threonine-protein kinase Sgk3	AGC	SGK		Q96BR1
SGK2	SGK2	SGK2	Serine/threonine-protein kinase Sgk2	AGC	SGK		Q9HBY8
SGK1	SGK	SGK1	Serine/threonine-protein kinase Sgk1	AGC	SGK		O00141
SCYL3	SCYL3	SCYL3	Protein-associating with the carboxyl-terminal domain of ezrin	Other	SCY1		Q8IZE3
SCYL2	SCYL2	SCYL2	SCY1-like protein 2	Other	SCY1		Q6P3W7
SCYL1	SCYL1	SCYL1	N-terminal kinase-like protein	Other	SCY1		Q96KG9
SBK	SBK	SBK1	Serine/threonine-protein kinase SBK1	Other	NKF1		Q52WX2
RYK	RYK	RYK	Tyrosine-protein kinase RYK	TK	Ryk		P34925
RSKL2	RSKL2	RPS6KL1	Ribosomal protein S6 kinase-like 1	AGC	RSKL		Q9Y6S9
RSKL1	RSKL1	RPS6KC1	Ribosomal protein S6 kinase delta-1	AGC	RSKL		Q96S38
RSK4_b	Domain2_RSK4	RPS6KA6	Ribosomal protein S6 kinase alpha-6	CAMK	RSKb	RSKb	Q9UK32
RSK4	RSK4	RPS6KA6	Ribosomal protein S6 kinase alpha-6	AGC	RSK	RSKp90	Q9UK32
RSK3_b	Domain2_RSK1	RPS6KA2	Ribosomal protein S6 kinase alpha-2	CAMK	RSKb	RSKb	Q15349
RSK3	RSK1	RPS6KA2	Ribosomal protein S6 kinase alpha-2	AGC	RSK	RSKp90	Q15349
RSK2_b	Domain2_RSK2	RPS6KA3	Ribosomal protein S6 kinase alpha-3	CAMK	RSKb	RSKb	P51812
RSK2	RSK2	RPS6KA3	Ribosomal protein S6 kinase alpha-3	AGC	RSK	RSKp90	P51812
RSK1_b	Domain2_RSK3	RPS6KA1	Ribosomal protein S6 kinase alpha-1	CAMK	RSKb	RSKb	Q15418
RSK1	RSK3	RPS6KA1	Ribosomal protein S6 kinase alpha-1	AGC	RSK	RSKp90	Q15418
ROS	ROS	ROS1	Proto-oncogene tyrosine-protein kinase ROS	TK	Sev		P08922
ROR2	ROR2	ROR2	Tyrosine-protein kinase transmembrane receptor ROR2	TK	Ror		Q01974
ROR1	ROR1	ROR1	Tyrosine-protein kinase transmembrane receptor ROR1	TK	Ror		Q01973
RON	RON	MST1R	Macrophage-stimulating protein receptor	TK	Met		Q04912
ROCK2	ROCK2	ROCK2	Rho-associated protein kinase 2	AGC	DMPK	ROCK	O75116
ROCK1	ROCK1	ROCK1	Rho-associated protein kinase 1	AGC	DMPK	ROCK	Q13464
RNAseL	RNAseL	RNASEL	2-5A-dependent ribonuclease	Other	Other-Unique		Q05823
RIPK3	RIPK3	RIPK3	Receptor-interacting serine/threonine-protein kinase 3	TKL	RIPK		Q9Y572
RIPK2	RIPK2	RIPK2	Receptor-interacting serine/threonine-protein kinase 2	TKL	RIPK		O43353
RIPK1	RIPK1	RIPK1	Receptor-interacting serine/threonine-protein kinase 1	TKL	RIPK		Q13546
RIOK3	RIOK3	RIOK3	Serine/threonine-protein kinase RIO3	Atypical	RIO	RIO3	O14730
RIOK2	RIOK2	RIOK2	Serine/threonine-protein kinase RIO2	Atypical	RIO	RIO2	Q9BVS4
RIOK1	RIOK1	RIOK1	Serine/threonine-protein kinase RIO1	Atypical	RIO	RIO1	Q9BRS2
RHOK	RHOK	GRK1	Rhodopsin kinase	AGC	GRK	GRK	Q15835
RET	RET	RET	Proto-oncogene tyrosine-protein kinase receptor Ret	TK	Ret		P07949
RAF1	RAF1	RAF1	RAF proto-oncogene serine/threonine-protein kinase	TKL	RAF		P04049
QSK	QSK	SIK3	Serine/threonine-protein kinase SIK3	CAMK	CAMKL	QIK	Q9Y2K2
QIK	QIK	SIK2	Serine/threonine-protein kinase SIK2	CAMK	CAMKL	QIK	Q9H0K1
PYK2	PYK2	PTK2B	Protein-tyrosine kinase 2-beta	TK	FAK		Q14289
PSKH2	PSKH2	PSKH2	Serine/threonine-protein kinase H2	CAMK	PSK		Q96QS6
PSKH1	PSKH1	PSKH1	Serine/threonine-protein kinase H1	CAMK	PSK		P11801
PRPK	PRPK	TP53RK	TP53-regulating kinase	Other	Bud32		Q96S44
PRP4	PRP4	PRPF4B	Serine/threonine-protein kinase PRP4 homolog	CMGC	DYRK	PRP4	Q13523
PRKY	PRKY	PRKY	Serine/threonine-protein kinase PRKY	AGC	PKA		O43930
PRKX	PRKX	PRKX	cAMP-dependent protein kinase catalytic subunit PRKX	AGC	PKA		P51817
PLK4	PLK4	PLK4	Serine/threonine-protein kinase PLK4	Other	PLK		O00444
PLK3	PLK3	PLK3	Serine/threonine-protein kinase PLK3	Other	PLK		Q9H4B4
PLK2	PLK2	PLK2	Serine/threonine-protein kinase PLK2	Other	PLK		Q9NYY3
PLK1	PLK1	PLK1	Serine/threonine-protein kinase PLK1	Other	PLK		P53350
PKR	PKR	EIF2AK2	Interferon-induced	Other	PEK		P19525
PKN3	PKN3	PKN3	Serine/threonine-protein kinase N3	AGC	PKN		Q6P5Z2
PKN2	PKN2	PKN2	Serine/threonine-protein kinase N2	AGC	PKN		Q16513
PKN1	PKN1	PKN1	Serine/threonine-protein kinase N1	AGC	PKN		Q16512
PKG2	PKG2	PRKG2	cGMP-dependent protein kinase 2	AGC	PKG		Q13237
PKG1	PKG1	PRKG1	cGMP-dependent protein kinase	AGC	PKG		Q13976
PKD3	PKD3	PRKD3	Serine/threonine-protein kinase D3	CAMK	PKD		O94806
PKD2	PKD2	PRKD2	Serine/threonine-protein kinase D2	CAMK	PKD		Q9BZL6
PKD1	PKD1	PRKD1	Serine/threonine-protein kinase D1	CAMK	PKD		Q15139
PKCz	PKCz	PRKCZ	Protein kinase C zeta type	AGC	PKC	PKCi	Q05513
PKCt	PKCt	PRKCQ	Protein kinase C theta type	AGC	PKC	PKCd	Q04759
PKCi	PKCi	PRKCI	Protein kinase C iota type	AGC	PKC	PKCi	P41743
PKCh	PKCh	PRKCH	Protein kinase C eta type	AGC	PKC	PKCh	P24723
PKCg	PKCg	PRKCG	Protein kinase C gamma type	AGC	PKC	PKCa	P05129
PKCe	PKCe	PRKCE	Protein kinase C epsilon type	AGC	PKC	PKCh	Q02156
PKCd	PKCd	PRKCD	Protein kinase C delta type	AGC	PKC	PKCd	Q05655
PKCb	PKCb	PRKCB	Protein kinase C beta type	AGC	PKC	PKCa	P05771
PKCa	PKCa	PRKCA	Protein kinase C alpha type	AGC	PKC	PKCa	P17252
PKACg	PKACg	PRKACG	cAMP-dependent protein kinase catalytic subunit gamma	AGC	PKA		P22612
PKACb	PKACb	PRKACB	cAMP-dependent protein kinase catalytic subunit beta	AGC	PKA		P22694
PKACa	PKACa	PRKACA	cAMP-dependent protein kinase catalytic subunit alpha	AGC	PKA		P17612
PITSLRE	PITSLRE	CDK11B	Cyclin-dependent kinase 11B	CMGC	CDK	CDK11	P21127
PINK1	PINK1	PINK1	Serine/threonine-protein kinase PINK1	Other	NKF2		Q9BXM7
PIM3	PIM3	PIM3	Serine/threonine-protein kinase pim-3	CAMK	PIM		Q86V86
PIM2	PIM2	PIM2	Serine/threonine-protein kinase pim-2	CAMK	PIM		Q9P1W9
PIM1	PIM1	PIM1	Serine/threonine-protein kinase pim-1	CAMK	PIM		P11309
PIK3R4	PIK3R4	PIK3R4	Phosphoinositide 3-kinase regulatory subunit 4	Other	VPS15		Q99570
PHKg2	PHKg2	PHKG2	Phosphorylase b kinase gamma catalytic chain	CAMK	PHK		P15735
PHKg1	PHKg1	PHKG1	Phosphorylase b kinase gamma catalytic chain	CAMK	PHK		Q16816
PFTAIRE2	PFTAIRE2	CDK15	Cyclin-dependent kinase 15	CMGC	CDK	PFTAIRE	Q96Q40
PFTAIRE1	PFTAIRE1	CDK14	Cyclin-dependent kinase 14	CMGC	CDK	PFTAIRE	O94921
PEK	PEK	EIF2AK3	Eukaryotic translation initiation factor 2-alpha kinase 3	Other	PEK	PEK	Q9NZJ5
PDK1	PDK1	PDPK1	3-phosphoinositide-dependent protein kinase 1	AGC	PDK1		O15530
PDHK4	PDHK4	PDK4	[Pyruvate dehydrogenase [lipoamide]] kinase isozyme 4	Atypical	PDHK		Q16654
PDHK3	PDHK3	PDK3	[Pyruvate dehydrogenase [lipoamide]] kinase isozyme 3	Atypical	PDHK		Q15120
PDHK2	PDHK2	PDK2	[Pyruvate dehydrogenase [lipoamide]] kinase isozyme 2	Atypical	PDHK		Q15119
PDHK1	PDHK1	PDK1	[Pyruvate dehydrogenase [lipoamide]] kinase isozyme 1	Atypical	PDHK		Q15118
PDGFRb	PDGFRb	PDGFRB	Platelet-derived growth factor receptor beta	TK	PDGFR		P09619
PDGFRa	PDGFRa	PDGFRA	Platelet-derived growth factor receptor alpha	TK	PDGFR		P16234
PCTAIRE3	PCTAIRE3	CDK18	Cyclin-dependent kinase 18	CMGC	CDK	PCTAIRE	Q07002
PCTAIRE2	PCTAIRE2	CDK17	Cyclin-dependent kinase 17	CMGC	CDK	PCTAIRE	Q00537
PCTAIRE1	PCTAIRE1	CDK16	Cyclin-dependent kinase 16	CMGC	CDK	PCTAIRE	Q00536
PBK	PBK	PBK	Lymphokine-activated killer T-cell-originated protein kinase	Other	TOPK		Q96KB5
PASK	PASK	PASK	PAS domain-containing serine/threonine-protein kinase	CAMK	CAMKL	PASK	Q96RG2
PAN3	PAN3	PAN3	PAB-dependent poly(A)-specific ribonuclease subunit 3	Other	PAN3		Q58A45
PAK6	PAK6	PAK6	Serine/threonine-protein kinase PAK 6	STE	STE20	PAKB	Q9NQU5
PAK5	PAK5	PAK7	Serine/threonine-protein kinase PAK 7	STE	STE20	PAKB	Q9P286
PAK4	PAK4	PAK4	Serine/threonine-protein kinase PAK 4	STE	STE20	PAKB	O96013
PAK3	PAK3	PAK3	Serine/threonine-protein kinase PAK 3	STE	STE20	PAKA	O75914
PAK2	PAK2	PAK2	Serine/threonine-protein kinase PAK 2	STE	STE20	PAKA	Q13177
PAK1	PAK1	PAK1	Serine/threonine-protein kinase PAK 1	STE	STE20	PAKA	Q13153
Obscn_b	Domain2_Obscn	OBSCN	Obscurin	CAMK	Trio		Q5VST9
Obscn	Obscn	OBSCN	Obscurin	CAMK	Trio		Q5VST9
OSR1	OSR1	OXSR1	Serine/threonine-protein kinase OSR1	STE	STE20	FRAY	O95747
NuaK2	NuaK2	NUAK2	NUAK family SNF1-like kinase 2	CAMK	CAMKL	NuaK	Q9H093
NuaK1	NuaK1	NUAK1	NUAK family SNF1-like kinase 1	CAMK	CAMKL	NuaK	O60285
NRK	ZC4/NRK	NRK	Nik-related protein kinase	STE	STE20	MSN	Q7Z2Y5
NRBP2	NRBP2	NRBP2	Nuclear receptor-binding protein 2	Other	NRBP		Q9NSY0
NRBP1	NRBP1	NRBP1	Nuclear receptor-binding protein	Other	NRBP		Q9UHY1
NLK	NLK	NLK	Serine/threonine-protein kinase NLK	CMGC	MAPK	nmo	Q9UBE8
NIM1	NIM1	NIM1K	Serine/threonine-protein kinase NIM1	CAMK	CAMKL	NIM1	Q8IY84
NIK	NIK	MAP3K14	Mitogen-activated protein kinase kinase kinase 14	STE	STE-Unique		Q99558
NEK9	NEK9	NEK9	Serine/threonine-protein kinase Nek9	Other	NEK		Q8TD19
NEK8	NEK8	NEK8	Serine/threonine-protein kinase Nek8	Other	NEK		Q86SG6
NEK7	NEK7	NEK7	Serine/threonine-protein kinase Nek7	Other	NEK		Q8TDX7
NEK6	NEK6	NEK6	Serine/threonine-protein kinase Nek6	Other	NEK		Q9HC98
NEK5	NEK5	NEK5	Serine/threonine-protein kinase Nek5	Other	NEK		Q6P3R8
NEK4	NEK4	NEK4	Serine/threonine-protein kinase Nek4	Other	NEK		P51957
NEK3	NEK3	NEK3	Serine/threonine-protein kinase Nek3	Other	NEK		P51956
NEK2	NEK2	NEK2	Serine/threonine-protein kinase Nek2	Other	NEK		P51955
NEK11	NEK11	NEK11	Serine/threonine-protein kinase Nek11	Other	NEK		Q8NG66
NEK10	NEK10	NEK10	Serine/threonine-protein kinase Nek10	Other	NEK		Q6ZWH5
NEK1	NEK1	NEK1	Serine/threonine-protein kinase Nek1	Other	NEK		Q96PY6
NDR2	NDR2	STK38L	Serine/threonine-protein kinase 38-like	AGC	NDR		Q9Y2H1
NDR1	NDR1	STK38	Serine/threonine-protein kinase 38	AGC	NDR		Q15208
MYT1	MYT1	PKMYT1	Membrane-associated tyrosine- and threonine-specific cdc2-inhibitory kinase	Other	WEE		Q99640
MYO3B	MYO3B	MYO3B	Myosin-IIIb	STE	STE20	NinaC	Q8WXR4
MYO3A	MYO3A	MYO3A	Myosin-IIIa	STE	STE20	NinaC	Q8NEV4
MUSK	MUSK	MUSK	Muscle	TK	Musk		O15146
MST4	MST4	STK26	Serine/threonine-protein kinase MST4	STE	STE20	YSK	Q9P289
MST3	MST3	STK24	Serine/threonine-protein kinase 24	STE	STE20	YSK	Q9Y6E0
MST2	MST2	STK3	Serine/threonine-protein kinase 3	STE	STE20	MST	Q13188
MST1	MST1	STK4	Serine/threonine-protein kinase 4	STE	STE20	MST	Q13043
MSSK1	MSSK1	SRPK3	SRSF protein kinase 3	CMGC	SRPK		Q9UPE1
MSK2_b	Domain2_MSK2	RPS6KA4	Ribosomal protein S6 kinase alpha-4	CAMK	RSKb	MSKb	O75676
MSK2	MSK2	RPS6KA4	Ribosomal protein S6 kinase alpha-4	AGC	RSK	MSK	O75676
MSK1_b	Domain2_MSK1	RPS6KA5	Ribosomal protein S6 kinase alpha-5	CAMK	RSKb	MSKb	O75582
MSK1	MSK1	RPS6KA5	Ribosomal protein S6 kinase alpha-5	AGC	RSK	MSK	O75582
MRCKb	MRCKb	CDC42BPB	Serine/threonine-protein kinase MRCK beta	AGC	DMPK	GEK	Q9Y5S2
MRCKa	MRCKa	CDC42BPA	Serine/threonine-protein kinase MRCK alpha	AGC	DMPK	GEK	Q5VT25
MPSK1	MPSK1	STK16	Serine/threonine-protein kinase 16	Other	NAK		O75716
MOS	MOS	MOS	Proto-oncogene serine/threonine-protein kinase mos	Other	MOS		P00540
MOK	MOK	MOK	MAPK/MAK/MRK overlapping kinase	CMGC	RCK		Q9UQ07
MNK2	MNK2	MKNK2	MAP kinase-interacting serine/threonine-protein kinase 2	CAMK	MAPKAPK	MNK	Q9HBH9
MNK1	MNK1	MKNK1	MAP kinase-interacting serine/threonine-protein kinase 1	CAMK	MAPKAPK	MNK	Q9BUB5
MLKL	MLKL	MLKL	Mixed lineage kinase domain-like protein	TKL	TKL-Unique		Q8NB16
MLK4	MLK4		Mitogen-activated protein kinase kinase kinase MLK4	TKL	MLK	MLK	Q5TCX8
MLK3	MLK3	MAP3K11	Mitogen-activated protein kinase kinase kinase 11	TKL	MLK	MLK	Q16584
MLK2	MLK2	MAP3K10	Mitogen-activated protein kinase kinase kinase 10	TKL	MLK	MLK	Q02779
MLK1	MLK1	MAP3K9	Mitogen-activated protein kinase kinase kinase 9	TKL	MLK	MLK	P80192
MISR2	MISR2	AMHR2	Anti-Muellerian hormone type-2 receptor	TKL	STKR	STKR2	Q16671
MINK	ZC3/MINK	MINK1	Misshapen-like kinase 1	STE	STE20	MSN	Q8N4C8
MET	MET	MET	Hepatocyte growth factor receptor	TK	Met		P08581
MER	MER	MERTK	Tyrosine-protein kinase Mer	TK	Axl		Q12866
MELK	MELK	MELK	Maternal embryonic leucine zipper kinase	CAMK	CAMKL	MELK	Q14680
MASTL	MASTL	MASTL	Serine/threonine-protein kinase greatwall	AGC	MAST		Q96GX5
MAST4	MAST4	MAST4	Microtubule-associated serine/threonine-protein kinase 4	AGC	MAST		O15021
MAST3	MAST3	MAST3	Microtubule-associated serine/threonine-protein kinase 3	AGC	MAST		O60307
MAST2	MAST2	MAST2	Microtubule-associated serine/threonine-protein kinase 2	AGC	MAST		Q6P0Q8
MAST1	MAST1	MAST1	Microtubule-associated serine/threonine-protein kinase 1	AGC	MAST		Q9Y2H9
MARK4	MARK4	MARK4	MAP/microtubule affinity-regulating kinase 4	CAMK	CAMKL	MARK	Q96L34
MARK3	MARK3	MARK3	MAP/microtubule affinity-regulating kinase 3	CAMK	CAMKL	MARK	P27448
MARK2	MARK2	MARK2	Serine/threonine-protein kinase MARK2	CAMK	CAMKL	MARK	Q7KZI7
MARK1	MARK1	MARK1	Serine/threonine-protein kinase MARK1	CAMK	CAMKL	MARK	Q9P0L2
MAPKAPK5	MAPKAPK5	MAPKAPK5	MAP kinase-activated protein kinase 5	CAMK	MAPKAPK	MK5	Q8IW41
MAPKAPK3	MAPKAPK3	MAPKAPK3	MAP kinase-activated protein kinase 3	CAMK	MAPKAPK	MK2	Q16644
MAPKAPK2	MAPKAPK2	MAPKAPK2	MAP kinase-activated protein kinase 2	CAMK	MAPKAPK	MK2	P49137
MAP3K7	MAP3K7	MAP3K15	Mitogen-activated protein kinase kinase kinase 15	STE	STE11		Q6ZN16
MAP3K6	MAP3K6	MAP3K6	Mitogen-activated protein kinase kinase kinase 6	STE	STE11		O95382
MAP3K5	MAP3K5	MAP3K5	Mitogen-activated protein kinase kinase kinase 5	STE	STE11		Q99683
MAP3K4	MAP3K4	MAP3K4	Mitogen-activated protein kinase kinase kinase 4	STE	STE11		Q9Y6R4
MAP3K3	MAP3K3	MAP3K3	Mitogen-activated protein kinase kinase kinase 3	STE	STE11		Q99759
MAP3K2	MAP3K2	MAP3K2	Mitogen-activated protein kinase kinase kinase 2	STE	STE11		Q9Y2U5
MAP3K19	MAP3K8	MAP3K19	Mitogen-activated protein kinase kinase kinase 19	STE	STE11		Q56UN5
MAP3K1	MAP3K1	MAP3K1	Mitogen-activated protein kinase kinase kinase 1	STE	STE11		Q13233
MAP2K7	MAP2K7	MAP2K7	Dual specificity mitogen-activated protein kinase kinase 7	STE	STE7		O14733
MAP2K6	MAP2K6	MAP2K6	Dual specificity mitogen-activated protein kinase kinase 6	STE	STE7		P52564
MAP2K5	MAP2K5	MAP2K5	Dual specificity mitogen-activated protein kinase kinase 5	STE	STE7		Q13163
MAP2K4	MAP2K4	MAP2K4	Dual specificity mitogen-activated protein kinase kinase 4	STE	STE7		P45985
MAP2K3	MAP2K3	MAP2K3	Dual specificity mitogen-activated protein kinase kinase 3	STE	STE7		P46734
MAP2K2	MAP2K2	MAP2K2	Dual specificity mitogen-activated protein kinase kinase 2	STE	STE7		P36507
MAP2K1	MAP2K1	MAP2K1	Dual specificity mitogen-activated protein kinase kinase 1	STE	STE7		Q02750
MAK	MAK	MAK	Serine/threonine-protein kinase MAK	CMGC	RCK		P20794
LZK	LZK	MAP3K13	Mitogen-activated protein kinase kinase kinase 13	TKL	MLK	LZK	O43283
LYN	LYN	LYN	Tyrosine-protein kinase Lyn	TK	Src		P07948
LTK	LTK	LTK	Leukocyte tyrosine kinase receptor	TK	ALK		P29376
LRRK2	LRRK2	LRRK2	Leucine-rich repeat serine/threonine-protein kinase 2	TKL	LRRK		Q5S007
LRRK1	LRRK1	LRRK1	Leucine-rich repeat serine/threonine-protein kinase 1	TKL	LRRK		Q38SD2
LOK	LOK	STK10	Serine/threonine-protein kinase 10	STE	STE20	SLK	O94804
LMR3	LMR3	LMTK3	Serine/threonine-protein kinase LMTK3	TK	Lmr		Q96Q04
LMR2	LMR2	LMTK2	Serine/threonine-protein kinase LMTK2	TK	Lmr		Q8IWU2
LMR1	LMR1	AATK	Serine/threonine-protein kinase LMTK1	TK	Lmr		Q6ZMQ8
LKB1	LKB1	STK11	Serine/threonine-protein kinase STK11	CAMK	CAMKL	LKB	Q15831
LIMK2	LIMK2	LIMK2	LIM domain kinase 2	TKL	LISK	LIMK	P53671
LIMK1	LIMK1	LIMK1	LIM domain kinase 1	TKL	LISK	LIMK	P53667
LCK	LCK	LCK	Tyrosine-protein kinase Lck	TK	Src		P06239
LATS2	LATS2	LATS2	Serine/threonine-protein kinase LATS2	AGC	NDR		Q9NRM7
LATS1	LATS1	LATS1	Serine/threonine-protein kinase LATS1	AGC	NDR		O95835
KSR2	KSR2	KSR2	Kinase suppressor of Ras 2	TKL	RAF		Q6VAB6
KSR1	KSR1	KSR1	Kinase suppressor of Ras 1	TKL	RAF	KSR	Q8IVT5
KIT	KIT	KIT	Mast/stem cell growth factor receptor Kit	TK	PDGFR		P10721
KIS	KIS	UHMK1	Serine/threonine-protein kinase Kist	Other	KIS		Q8TAS1
KHS2	KHS2	MAP4K3	Mitogen-activated protein kinase kinase kinase kinase 3	STE	STE20	KHS	Q8IVH8
KHS1	KHS1	MAP4K5	Mitogen-activated protein kinase kinase kinase kinase 5	STE	STE20	KHS	Q9Y4K4
KDR	KDR	KDR	Vascular endothelial growth factor receptor 2	TK	VEGFR		P35968
JNK3	JNK3	MAPK10	Mitogen-activated protein kinase 10	CMGC	MAPK	JNK	P53779
JNK2	JNK2	MAPK9	Mitogen-activated protein kinase 9	CMGC	MAPK	JNK	P45984
JNK1	JNK1	MAPK8	Mitogen-activated protein kinase 8	CMGC	MAPK	JNK	P45983
JAK3_b	Domain2_JAK3	JAK3	Tyrosine-protein kinase JAK3	TK	JakB		P52333
JAK3	JAK3	JAK3	Tyrosine-protein kinase JAK3	TK	Jak		P52333
JAK2_b	Domain2_JAK2	JAK2	Tyrosine-protein kinase JAK2	TK	JakB		O60674
JAK2	JAK2	JAK2	Tyrosine-protein kinase JAK2	TK	Jak		O60674
JAK1_b	Domain2_JAK1	JAK1	Tyrosine-protein kinase JAK1	TK	JakB		P23458
JAK1	JAK1	JAK1	Tyrosine-protein kinase JAK1	TK	Jak		P23458
ITK	ITK	ITK	Tyrosine-protein kinase ITK/TSK	TK	Tec		Q08881
IRR	IRR	INSRR	Insulin receptor-related protein	TK	InsR		P14616
IRE2	IRE2	ERN2	Serine/threonine-protein kinase/endoribonuclease IRE2	Other	IRE		Q76MJ5
IRE1	IRE1	ERN1	Serine/threonine-protein kinase/endoribonuclease IRE1	Other	IRE		O75460
IRAK4	IRAK4	IRAK4	Interleukin-1 receptor-associated kinase 4	TKL	IRAK		Q9NWZ3
IRAK3	IRAK3	IRAK3	Interleukin-1 receptor-associated kinase 3	TKL	IRAK		Q9Y616
IRAK2	IRAK2	IRAK2	Interleukin-1 receptor-associated kinase-like 2	TKL	IRAK		O43187
IRAK1	IRAK1	IRAK1	Interleukin-1 receptor-associated kinase 1	TKL	IRAK		P51617
INSR	INSR	INSR	Insulin receptor	TK	InsR		P06213
ILK	ILK	ILK	Integrin-linked protein kinase	TKL	MLK	ILK	Q13418
IKKe	IKKe	IKBKE	Inhibitor of nuclear factor kappa-B kinase subunit epsilon	Other	IKK		Q14164
IKKb	IKKb	IKBKB	Inhibitor of nuclear factor kappa-B kinase subunit beta	Other	IKK		O14920
IKKa	IKKa	CHUK	Inhibitor of nuclear factor kappa-B kinase subunit alpha	Other	IKK		O15111
IGF1R	IGF1R	IGF1R	Insulin-like growth factor 1 receptor	TK	InsR		P08069
ICK	ICK	ICK	Serine/threonine-protein kinase ICK	CMGC	RCK		Q9UPZ9
Haspin	Haspin	GSG2	Serine/threonine-protein kinase haspin	Other	Haspin		Q8TF76
HUNK	HUNK	HUNK	Hormonally up-regulated neu tumor-associated kinase	CAMK	CAMKL	HUNK	P57058
HSER	HSER	GUCY2C	Heat-stable enterotoxin receptor	RGC	RGC		P25092
HRI	HRI	EIF2AK1	Eukaryotic translation initiation factor 2-alpha kinase 1	Other	PEK		Q9BQI3
HPK1	HPK1	MAP4K1	Mitogen-activated protein kinase kinase kinase kinase 1	STE	STE20	KHS	Q92918
HIPK4	HIPK4	HIPK4	Homeodomain-interacting protein kinase 4	CMGC	DYRK	HIPK	Q8NE63
HIPK3	HIPK3	HIPK3	Homeodomain-interacting protein kinase 3	CMGC	DYRK	HIPK	Q9H422
HIPK2	HIPK2	HIPK2	Homeodomain-interacting protein kinase 2	CMGC	DYRK	HIPK	Q9H2X6
HIPK1	HIPK1	HIPK1	Homeodomain-interacting protein kinase 1	CMGC	DYRK	HIPK	Q86Z02
HH498	HH498	TNNI3K	Serine/threonine-protein kinase TNNI3K	TKL	MLK	HH498	Q59H18
HGK	ZC1/HGK	MAP4K4	Mitogen-activated protein kinase kinase kinase kinase 4	STE	STE20	MSN	O95819
HCK	HCK	HCK	Tyrosine-protein kinase HCK	TK	Src		P08631
GTF2F1	GTF2F1		nan	Atypical	GTF2F1		Q6IBK5
GSK3B	GSK3B	GSK3B	Glycogen synthase kinase-3 beta	CMGC	GSK		P49841
GSK3A	GSK3A	GSK3A	Glycogen synthase kinase-3 alpha	CMGC	GSK		P49840
GPRK7	GPRK7	GRK7	G protein-coupled receptor kinase 7	AGC	GRK	GRK	Q8WTQ7
GPRK6	GPRK6	GRK6	G protein-coupled receptor kinase 6	AGC	GRK	GRK	P43250
GPRK5	GPRK5	GRK5	G protein-coupled receptor kinase 5	AGC	GRK	GRK	P34947
GPRK4	GPRK4	GRK4	G protein-coupled receptor kinase 4	AGC	GRK	GRK	P32298
GCN2_b	Domain2_GCN2	EIF2AK4	Eukaryotic translation initiation factor 2-alpha kinase 4	STE	STE-Unique		Q9P2K8
GCN2	GCN2	EIF2AK4	Eukaryotic translation initiation factor 2-alpha kinase 4	Other	PEK	GCN2	Q9P2K8
GCK	GCK	MAP4K2	Mitogen-activated protein kinase kinase kinase kinase 2	STE	STE20	KHS	Q12851
GAK	GAK	GAK	Cyclin-G-associated kinase	Other	NAK		O14976
G11	G11	STK19	Serine/threonine-protein kinase 19	Atypical	G11		P49842
Fused	Fused	STK36	Serine/threonine-protein kinase 36	Other	ULK		Q9NRP7
FYN	FYN	FYN	Tyrosine-protein kinase Fyn	TK	Src		P06241
FRK	FRK	FRK	Tyrosine-protein kinase FRK	TK	Src		P42685
FRAP	FRAP	MTOR	Serine/threonine-protein kinase mTOR	Atypical	PIKK	FRAP	P42345
FMS	FMS	CSF1R	Macrophage colony-stimulating factor 1 receptor	TK	PDGFR		P07333
FLT4	FLT4	FLT4	Vascular endothelial growth factor receptor 3	TK	VEGFR		P35916
FLT3	FLT3	FLT3	Receptor-type tyrosine-protein kinase FLT3	TK	PDGFR		P36888
FLT1	FLT1	FLT1	Vascular endothelial growth factor receptor 1	TK	VEGFR		P17948
FGR	FGR	FGR	Tyrosine-protein kinase Fgr	TK	Src		P09769
FGFR4	FGFR4	FGFR4	Fibroblast growth factor receptor 4	TK	FGFR		P22455
FGFR3	FGFR3	FGFR3	Fibroblast growth factor receptor 3	TK	FGFR		P22607
FGFR2	FGFR2	FGFR2	Fibroblast growth factor receptor 2	TK	FGFR		P21802
FGFR1	FGFR1	FGFR1	Fibroblast growth factor receptor 1	TK	FGFR		P11362
FES	FES	FES	Tyrosine-protein kinase Fes/Fps	TK	Fer		P07332
FER	FER	FER	Tyrosine-protein kinase Fer	TK	Fer		P16591
FASTK	FASTK	FASTK	Fas-activated serine/threonine kinase	Atypical	FAST		Q14296
FAK	FAK	PTK2	Focal adhesion kinase 1	TK	FAK		Q05397
Erk7	Erk7	MAPK15	Mitogen-activated protein kinase 15	CMGC	MAPK	ERK7	Q8TD08
Erk5	Erk5	MAPK7	Mitogen-activated protein kinase 7	CMGC	MAPK	ERK5	Q13164
Erk4	Erk4	MAPK4	Mitogen-activated protein kinase 4	CMGC	MAPK	ERK3	P31152
Erk3	Erk3	MAPK6	Mitogen-activated protein kinase 6	CMGC	MAPK	ERK3	Q16659
Erk2	Erk2	MAPK1	Mitogen-activated protein kinase 1	CMGC	MAPK	ERK1	P28482
Erk1	Erk1	MAPK3	Mitogen-activated protein kinase 3	CMGC	MAPK	ERK1	P27361
ErbB4	HER4/ErbB4	ERBB4	Receptor tyrosine-protein kinase erbB-4	TK	EGFR		Q15303
ErbB3	HER3/ErbB3	ERBB3	Receptor tyrosine-protein kinase erbB-3	TK	EGFR		P21860
ErbB2	HER2/ErbB2	ERBB2	Receptor tyrosine-protein kinase erbB-2	TK	EGFR		P04626
EphB6	EphB6	EPHB6	Ephrin type-B receptor 6	TK	Eph		O15197
EphB4	EphB4	EPHB4	Ephrin type-B receptor 4	TK	Eph		P54760
EphB3	EphB3	EPHB3	Ephrin type-B receptor 3	TK	Eph		P54753
EphB2	EphB2	EPHB2	Ephrin type-B receptor 2	TK	Eph		P29323
EphB1	EphB1	EPHB1	Ephrin type-B receptor 1	TK	Eph		P54762
EphA8	EphA8	EPHA8	Ephrin type-A receptor 8	TK	Eph		P29322
EphA7	EphA7	EPHA7	Ephrin type-A receptor 7	TK	Eph		Q15375
EphA6	EphA6	EPHA6	Ephrin type-A receptor 6	TK	Eph		Q9UF33
EphA5	EphA5	EPHA5	Ephrin type-A receptor 5	TK	Eph		P54756
EphA4	EphA4	EPHA4	Ephrin type-A receptor 4	TK	Eph		P54764
EphA3	EphA3	EPHA3	Ephrin type-A receptor 3	TK	Eph		P29320
EphA2	EphA2	EPHA2	Ephrin type-A receptor 2	TK	Eph		P29317
EphA10	EphA10	EPHA10	Ephrin type-A receptor 10	TK	Eph		Q5JZY3
EphA1	EphA1	EPHA1	Ephrin type-A receptor 1	TK	Eph		P21709
EGFR	EGFR	EGFR	Epidermal growth factor receptor	TK	EGFR		P00533
DYRK4	DYRK4	DYRK4	Dual specificity tyrosine-phosphorylation-regulated kinase 4	CMGC	DYRK	DYRK2	Q9NR20
DYRK3	DYRK3	DYRK3	Dual specificity tyrosine-phosphorylation-regulated kinase 3	CMGC	DYRK	DYRK2	O43781
DYRK2	DYRK2	DYRK2	Dual specificity tyrosine-phosphorylation-regulated kinase 2	CMGC	DYRK	DYRK2	Q92630
DYRK1B	DYRK1B	DYRK1B	Dual specificity tyrosine-phosphorylation-regulated kinase 1B	CMGC	DYRK	DYRK1	Q9Y463
DYRK1A	DYRK1A	DYRK1A	Dual specificity tyrosine-phosphorylation-regulated kinase 1A	CMGC	DYRK	DYRK1	Q13627
DRAK2	DRAK2	STK17B	Serine/threonine-protein kinase 17B	CAMK	DAPK		O94768
DRAK1	DRAK1	STK17A	Serine/threonine-protein kinase 17A	CAMK	DAPK		Q9UEE5
DNAPK	DNAPK	PRKDC	DNA-dependent protein kinase catalytic subunit	Atypical	PIKK	DNAPK	P78527
DMPK2	DMPK2	CDC42BPG	Serine/threonine-protein kinase MRCK gamma	AGC	DMPK	GEK	Q6DT37
DMPK1	DMPK1	DMPK	Myotonin-protein kinase	AGC	DMPK	GEK	Q09013
DLK	DLK	MAP3K12	Mitogen-activated protein kinase kinase kinase 12	TKL	MLK	LZK	Q12852
DDR2	DDR2	DDR2	Discoidin domain-containing receptor 2	TK	DDR		Q16832
DDR1	DDR1	DDR1	Epithelial discoidin domain-containing receptor 1	TK	DDR		Q08345
DCAMKL3	DCAMKL3	DCLK3	Serine/threonine-protein kinase DCLK3	CAMK	DCAMKL		Q9C098
DCAMKL2	DCAMKL2	DCLK2	Serine/threonine-protein kinase DCLK2	CAMK	DCAMKL		Q8N568
DCAMKL1	DCAMKL1	DCLK1	Serine/threonine-protein kinase DCLK1	CAMK	DCAMKL		O15075
DAPK3	DAPK3	DAPK3	Death-associated protein kinase 3	CAMK	DAPK		O43293
DAPK2	DAPK2	DAPK2	Death-associated protein kinase 2	CAMK	DAPK		Q9UIK4
DAPK1	DAPK1	DAPK1	Death-associated protein kinase 1	CAMK	DAPK		P53355
Col4A3BP	Col4A3BP	COL4A3BP	Collagen type IV alpha-3-binding protein	Atypical	Col4A3BP		Q9Y5P4
ChaK2	ChaK2	TRPM6	Transient receptor potential cation channel subfamily M member 6	Atypical	Alpha	ChaK	Q9BX84
ChaK1	ChaK1	TRPM7	Transient receptor potential cation channel subfamily M member 7	Atypical	Alpha	ChaK	Q96QT4
CaMKK2	CaMKK2	CAMKK2	Calcium/calmodulin-dependent protein kinase kinase 2	Other	CAMKK	CAMKK-Meta	Q96RR4
CaMKK1	CaMKK1	CAMKK1	Calcium/calmodulin-dependent protein kinase kinase 1	Other	CAMKK	CAMKK-Meta	Q8N5S9
CaMK4	CaMK4	CAMK4	Calcium/calmodulin-dependent protein kinase type IV	CAMK	CAMK1		Q16566
CaMK2g	CaMK2g	CAMK2G	Calcium/calmodulin-dependent protein kinase (CaM kinase) II gamma	CAMK	CAMK2		Q13555
CaMK2d	CaMK2d	CAMK2D	Calcium/calmodulin-dependent protein kinase type II subunit delta	CAMK	CAMK2		Q13557
CaMK2b	CaMK2b	CAMK2B	Calcium/calmodulin-dependent protein kinase type II subunit beta	CAMK	CAMK2		Q13554
CaMK2a	CaMK2a	CAMK2A	Calcium/calmodulin-dependent protein kinase type II subunit alpha	CAMK	CAMK2		Q9UQM7
CaMK1g	CaMK1g	CAMK1G	Calcium/calmodulin-dependent protein kinase type 1G	CAMK	CAMK1		Q96NX5
CaMK1d	CaMK1d	CAMK1D	Calcium/calmodulin-dependent protein kinase type 1D	CAMK	CAMK1		Q8IU85
CaMK1b	CaMK1b	PNCK	Calcium/calmodulin-dependent protein kinase type 1B	CAMK	CAMK1		Q6P2M8
CaMK1a	CaMK1a	CAMK1	Calcium/calmodulin-dependent protein kinase type 1	CAMK	CAMK1		Q14012
CYGF	CYGF	GUCY2F	Retinal guanylyl cyclase 2	RGC	RGC		P51841
CYGD	CYGD	GUCY2D	Retinal guanylyl cyclase 1	RGC	RGC		Q02846
CTK	CTK	MATK	Megakaryocyte-associated tyrosine-protein kinase	TK	Csk		P42679
CSK	CSK	CSK	Tyrosine-protein kinase CSK	TK	Csk		P41240
CRK7	CRK7	CDK12	Cyclin-dependent kinase 12	CMGC	CDK	CRK7	Q9NYV4
CRIK	CRIK	CIT	Citron Rho-interacting kinase	AGC	DMPK		O14578
COT	COT	MAP3K8	Mitogen-activated protein kinase kinase kinase 8	STE	STE-Unique		P41279
CLK4	CLK4	CLK4	Dual specificity protein kinase CLK4	CMGC	CLK		Q9HAZ1
CLK3	CLK3	CLK3	Dual specificity protein kinase CLK3	CMGC	CLK		P49761
CLK2	CLK2	CLK2	Dual specificity protein kinase CLK2	CMGC	CLK		P49760
CLK1	CLK1	CLK1	Dual specificity protein kinase CLK1	CMGC	CLK		P49759
CLIK1L	CLIK1L	PDIK1L	Serine/threonine-protein kinase PDIK1L	Other	NKF4		Q8N165
CLIK1	CLIK1	STK35	Serine/threonine-protein kinase 35	Other	NKF4		Q8TDR2
CK2a2	CK2a2	CSNK2A2	Casein kinase II subunit alpha'	CMGC	CK2		P19784
CK2a1	CK2a1	CSNK2A1	Casein kinase II subunit alpha	CMGC	CK2		P68400
CK1g3	CK1g3	CSNK1G3	Casein kinase I isoform gamma-3	CK1	CK1		Q9Y6M4
CK1g2	CK1g2	CSNK1G2	Casein kinase I isoform gamma-2	CK1	CK1		P78368
CK1g1	CK1g1	CSNK1G1	Casein kinase I isoform gamma-1	CK1	CK1		Q9HCP0
CK1e	CK1e	CSNK1E	Casein kinase I isoform epsilon	CK1	CK1		P49674
CK1d	CK1d	CSNK1D	Casein kinase I isoform delta	CK1	CK1		P48730
CK1a2	CK1a2	CSNK1A1L	Casein kinase I isoform alpha-like	CK1	CK1		Q8N752
CK1a	CK1a	CSNK1A1	Casein kinase I isoform alpha	CK1	CK1		P48729
CHK2	CHK2	CHEK2	Serine/threonine-protein kinase Chk2	CAMK	RAD53		O96017
CHK1	CHK1	CHEK1	Serine/threonine-protein kinase Chk1	CAMK	CAMKL	CHK1	O14757
CHED	CHED	CDK13	Cyclin-dependent kinase 13	CMGC	CDK	CRK7	Q14004
CDKL5	CDKL5	CDKL5	Cyclin-dependent kinase-like 5	CMGC	CDKL		O76039
CDKL4	CDKL4	CDKL4	Cyclin-dependent kinase-like 4	CMGC	CDKL		Q5MAI5
CDKL3	CDKL3	CDKL3	Cyclin-dependent kinase-like 3	CMGC	CDKL		Q8IVW4
CDKL2	CDKL2	CDKL2	Cyclin-dependent kinase-like 2	CMGC	CDKL		Q92772
CDKL1	CDKL1	CDKL1	Cyclin-dependent kinase-like 1	CMGC	CDKL		Q00532
CDK9	CDK9	CDK9	Cyclin-dependent kinase 9	CMGC	CDK	CDK9	P50750
CDK8	CDK8	CDK8	Cyclin-dependent kinase 8	CMGC	CDK	CDK8	P49336
CDK7	CDK7	CDK7	Cyclin-dependent kinase 7	CMGC	CDK	CDK7	P50613
CDK6	CDK6	CDK6	Cyclin-dependent kinase 6	CMGC	CDK	CDK4	Q00534
CDK5	CDK5	CDK5	Cyclin-dependent kinase 5	CMGC	CDK	CDK5	Q00535
CDK4	CDK4	CDK4	Cyclin-dependent kinase 4	CMGC	CDK	CDK4	P11802
CDK3	CDK3	CDK3	Cyclin-dependent kinase 3	CMGC	CDK	CDK2	Q00526
CDK2	CDK2	CDK2	Cyclin-dependent kinase 2	CMGC	CDK	CDK2	P24941
CDK11	CDK11	CDK19	Cyclin-dependent kinase 19	CMGC	CDK	CDK8	Q9BWU1
CDK10	CDK10	CDK10	Cyclin-dependent kinase 10	CMGC	CDK	CDK10	Q15131
CDC7	CDC7	CDC7	Cell division cycle 7-related protein kinase	Other	CDC7		O00311
CDC2	CDC2	CDK1	Cyclin-dependent kinase 1	CMGC	CDK	CDC2	P06493
CCRK	CCRK	CDK20	Cyclin-dependent kinase 20	CMGC	CDK		Q8IZL9
CCK4	CCK4	PTK7	Inactive tyrosine-protein kinase 7	TK	CCK4		Q13308
CASK	CASK	CASK	Peripheral plasma membrane protein CASK	CAMK	CASK		O14936
BUBR1	BUBR1	BUB1B	Mitotic checkpoint serine/threonine-protein kinase BUB1 beta	Other	BUB		O60566
BUB1	BUB1	BUB1	Mitotic checkpoint serine/threonine-protein kinase BUB1	Other	BUB		O43683
BTK	BTK	BTK	Tyrosine-protein kinase BTK	TK	Tec		Q06187
BRSK2	BRSK2	BRSK2	Serine/threonine-protein kinase BRSK2	CAMK	CAMKL	BRSK	Q8IWQ3
BRSK1	BRSK1	BRSK1	Serine/threonine-protein kinase BRSK1	CAMK	CAMKL	BRSK	Q8TDC3
BRK	BRK	PTK6	Protein-tyrosine kinase 6	TK	Src		Q13882
BRDT	BRDT	BRDT	Bromodomain testis-specific protein	Atypical	BRD		Q58F21
BRD4	BRD4	BRD4	BRD4 protein	Atypical	BRD		O60885
BRD3	BRD3	BRD3	Bromodomain-containing protein 3	Atypical	BRD		Q15059
BRD2	BRD2	BRD2	Bromodomain-containing protein 2	Atypical	BRD		P25440
BRAF	BRAF	BRAF	Serine/threonine-protein kinase B-raf	TKL	RAF		P15056
BMX	BMX	BMX	Cytoplasmic tyrosine-protein kinase BMX	TK	Tec		P51813
BMPR2	BMPR2	BMPR2	Bone morphogenetic protein receptor type-2	TKL	STKR	STKR2	Q13873
BMPR1B	BMPR1B	BMPR1B	Bone morphogenetic protein receptor type-1B	TKL	STKR	STKR1	O00238
BMPR1A	BMPR1A	BMPR1A	Bone morphogenetic protein receptor type-1A	TKL	STKR	STKR1	P36894
BLVRA	BLVRA	BLVRA	Biliverdin reductase A	Atypical	BLVRA		P53004
BLK	BLK	BLK	Tyrosine-protein kinase Blk	TK	Src		P51451
BIKE	BIKE	BMP2K	BMP-2-inducible protein kinase	Other	NAK		Q9NSY1
BCR	BCR	BCR	Breakpoint cluster region protein	Atypical	BCR		P11274
BCKDK	BCKDK	BCKDK	[3-methyl-2-oxobutanoate dehydrogenase [lipoamide]] kinase	Atypical	PDHK		O14874
BAZ1B	BAZ1B	BAZ1B	Tyrosine-protein kinase BAZ1B	Atypical	BAZ		Q9UIG0
BAZ1A	BAZ1A	BAZ1A	Bromodomain adjacent to zinc finger domain protein 1A	Atypical	BAZ		Q9NRL2
BARK2	BARK2	ADRBK2	Beta-adrenergic receptor kinase 2	AGC	GRK	BARK	P35626
BARK1	BARK1	ADRBK1	Beta-adrenergic receptor kinase 1	AGC	GRK	BARK	P25098
AurC	AurC	AURKC	Aurora kinase C	Other	Aur		Q9UQB9
AurB	AurB	AURKB	Aurora kinase B	Other	Aur		Q96GD4
AurA	AurA	AURKA	Aurora kinase A	Other	Aur		O14965
AlphaK3	AlphaK3	ALPK1	Alpha-protein kinase 1	Atypical	Alpha		Q96QP1
AlphaK2	AlphaK2	ALPK2	Alpha-protein kinase 2	Atypical	Alpha		Q86TB3
AlphaK1	AlphaK1	ALPK3	Alpha-protein kinase 3	Atypical	Alpha		Q96L96
AXL	AXL	AXL	Tyrosine-protein kinase receptor UFO	TK	Axl		P30530
ATR	ATR	ATR	Serine/threonine-protein kinase ATR	Atypical	PIKK	ATR	Q13535
ATM	ATM	ATM	Serine-protein kinase ATM	Atypical	PIKK	ATM	Q13315
ARAF	ARAF	ARAF	Serine/threonine-protein kinase A-Raf	TKL	RAF		P10398
ANPb	ANPb	NPR2	Atrial natriuretic peptide receptor 2	RGC	RGC		P20594
ANPa	ANPa	NPR1	Atrial natriuretic peptide receptor 1	RGC	RGC		P16066
ANKRD3	ANKRD3	RIPK4	Receptor-interacting serine/threonine-protein kinase 4	TKL	RIPK		P57078
AMPKa2	AMPKa2	PRKAA2	5'-AMP-activated protein kinase catalytic subunit alpha-2	CAMK	CAMKL	AMPK	P54646
AMPKa1	AMPKa1	PRKAA1	5'-AMP-activated protein kinase catalytic subunit alpha-1	CAMK	CAMKL	AMPK	Q13131
ALK7	ALK7	ACVR1C	Activin receptor type-1C	TKL	STKR	STKR1	Q8NER5
ALK4	ALK4	ACVR1B	Activin receptor type-1B	TKL	STKR	STKR1	P36896
ALK2	ALK2	ACVR1	Activin receptor type-1	TKL	STKR	STKR1	Q04771
ALK1	ALK1	ACVRL1	Serine/threonine-protein kinase receptor R3	TKL	STKR	STKR1	P37023
ALK	ALK	ALK	ALK tyrosine kinase receptor	TK	ALK		Q9UM73
AKT3	AKT3	AKT3	RAC-gamma serine/threonine-protein kinase	AGC	Akt		Q9Y243
AKT2	AKT2	AKT2	RAC-beta serine/threonine-protein kinase	AGC	Akt		P31751
AKT1	AKT1	AKT1	RAC-alpha serine/threonine-protein kinase	AGC	Akt		P31749
ADCK5	ADCK5	ADCK5	Uncharacterized aarF domain-containing protein kinase 5	Atypical	ABC1	ABC1-D	Q3MIX3
ADCK4	ADCK4	ADCK4	Uncharacterized aarF domain-containing protein kinase 4	Atypical	ABC1	ABC1-A	Q96D53
ADCK3	ADCK3	ADCK3	Chaperone activity of bc1 complex-like	Atypical	ABC1	ABC1-A	Q8NI60
ADCK2	ADCK2	ADCK2	Uncharacterized aarF domain-containing protein kinase 2	Atypical	ABC1	ABC1-C	Q7Z695
ADCK1	ADCK1	ADCK1	Uncharacterized aarF domain-containing protein kinase 1	Atypical	ABC1	ABC1-B	Q86TW2
ACTR2B	ACTR2B	ACVR2B	Activin receptor type-2B	TKL	STKR	STKR2	Q13705
ACTR2	ACTR2	ACVR2A	Activin receptor type-2A	TKL	STKR	STKR2	P27037
ACK	ACK	TNK2	Activated CDC42 kinase 1	TK	Ack		Q07912
ABR	ABR	ABR	Active breakpoint cluster region-related protein	Atypical	BCR		Q12979
ABL2	ARG	ABL2	Abelson tyrosine-protein kinase 2	TK	Abl		P42684
ABL1	ABL	ABL1	Tyrosine-protein kinase ABL1	TK	Abl		P00519
AAK1	AAK1	AAK1	AP2-associated protein kinase 1	Other	NAK		Q2M2I8

## Sheet: B Uniprot
Entry	Reviewed	Entry Name	Protein names	Gene Names	Organism	Length
A2RU49	reviewed	HYKK_HUMAN	Hydroxylysine kinase (5-hydroxy-L-lysine kinase) (EC 2.7.1.81) (Aminoglycoside phosphotransferase domain-containing protein 1)	HYKK AGPHD1	Homo sapiens (Human)	373
A4D2B8	reviewed	PM2P1_HUMAN	Putative postmeiotic segregation increased 2-like protein 1 (PMS2-related protein 2) (Postmeiotic segregation increased 2-like protein 13) (Postmeiotic segregation increased 2-like protein 6) (Postmeiotic segregation increased 2-like protein 8) (Postmeiotic segregation increased protein 3) (hPMS3) (Postmeiotic segregation increased protein 8) (Putative postmeiotic segregation increased 2 pseudoge…	PMS2P1 PMS2L1 PMS2L13 PMS2L6 PMS2L8 PMS3 PMS8 PMSR2	Homo sapiens (Human)	440
O00141	reviewed	SGK1_HUMAN	Serine/threonine-protein kinase Sgk1 (EC 2.7.11.1) (Serum/glucocorticoid-regulated kinase 1)	SGK1 SGK	Homo sapiens (Human)	431
O00142	reviewed	KITM_HUMAN	Thymidine kinase 2, mitochondrial (EC 2.7.1.21) (2'-deoxyuridine kinase TK2) (EC 2.7.1.74) (Deoxycytidine kinase TK2) (EC 2.7.1.-) (Mt-TK)	TK2	Homo sapiens (Human)	265
O00238	reviewed	BMR1B_HUMAN	Bone morphogenetic protein receptor type-1B (BMP type-1B receptor) (BMPR-1B) (EC 2.7.11.30) (CD antigen CDw293)	BMPR1B	Homo sapiens (Human)	502
O00311	reviewed	CDC7_HUMAN	Cell division cycle 7-related protein kinase (CDC7-related kinase) (HsCdc7) (huCdc7) (EC 2.7.11.1)	CDC7 CDC7L1	Homo sapiens (Human)	574
O00329	reviewed	PK3CD_HUMAN	Phosphatidylinositol 4,5-bisphosphate 3-kinase catalytic subunit delta isoform (PI3-kinase subunit delta) (PI3K-delta) (PI3Kdelta) (PtdIns-3-kinase subunit delta) (EC 2.7.1.137) (EC 2.7.1.153) (Phosphatidylinositol 4,5-bisphosphate 3-kinase 110 kDa catalytic subunit delta) (PtdIns-3-kinase subunit p110-delta) (p110delta)	PIK3CD	Homo sapiens (Human)	1044
O00418	reviewed	EF2K_HUMAN	Eukaryotic elongation factor 2 kinase (eEF-2 kinase) (eEF-2K) (EC 2.7.11.20) (Calcium/calmodulin-dependent eukaryotic elongation factor 2 kinase)	EEF2K	Homo sapiens (Human)	725
O00443	reviewed	P3C2A_HUMAN	Phosphatidylinositol 4-phosphate 3-kinase C2 domain-containing subunit alpha (PI3K-C2-alpha) (PtdIns-3-kinase C2 subunit alpha) (EC 2.7.1.137) (EC 2.7.1.153) (EC 2.7.1.154) (Phosphoinositide 3-kinase-C2-alpha)	PIK3C2A	Homo sapiens (Human)	1686
O00444	reviewed	PLK4_HUMAN	Serine/threonine-protein kinase PLK4 (EC 2.7.11.21) (Polo-like kinase 4) (PLK-4) (Serine/threonine-protein kinase 18) (Serine/threonine-protein kinase Sak)	PLK4 SAK STK18	Homo sapiens (Human)	970
O00506	reviewed	STK25_HUMAN	Serine/threonine-protein kinase 25 (EC 2.7.11.1) (Ste20-like kinase) (Sterile 20/oxidant stress-response kinase 1) (SOK-1) (Ste20/oxidant stress response kinase 1)	STK25 SOK1 YSK1	Homo sapiens (Human)	426
O00746	reviewed	NDKM_HUMAN	Nucleoside diphosphate kinase, mitochondrial (NDK) (NDP kinase, mitochondrial) (EC 2.7.4.6) (Nucleoside diphosphate kinase D) (NDPKD) (nm23-H4)	NME4 NM23D	Homo sapiens (Human)	187
O00750	reviewed	P3C2B_HUMAN	Phosphatidylinositol 4-phosphate 3-kinase C2 domain-containing subunit beta (PI3K-C2-beta) (PtdIns-3-kinase C2 subunit beta) (EC 2.7.1.137) (EC 2.7.1.154) (C2-PI3K) (Phosphoinositide 3-kinase-C2-beta)	PIK3C2B	Homo sapiens (Human)	1634
O00764	reviewed	PDXK_HUMAN	Pyridoxal kinase (EC 2.7.1.35) (Pyridoxine kinase)	PDXK C21orf124 C21orf97 PKH PNK PRED79	Homo sapiens (Human)	312
O14578	reviewed	CTRO_HUMAN	Citron Rho-interacting kinase (CRIK) (EC 2.7.11.1) (Serine/threonine-protein kinase 21)	CIT CRIK KIAA0949 STK21	Homo sapiens (Human)	2027
O14730	reviewed	RIOK3_HUMAN	Serine/threonine-protein kinase RIO3 (EC 2.7.11.1) (RIO kinase 3) (sudD homolog)	RIOK3 SUDD	Homo sapiens (Human)	519
O14733	reviewed	MP2K7_HUMAN	Dual specificity mitogen-activated protein kinase kinase 7 (MAP kinase kinase 7) (MAPKK 7) (EC 2.7.12.2) (JNK-activating kinase 2) (MAPK/ERK kinase 7) (MEK 7) (Stress-activated protein kinase kinase 4) (SAPK kinase 4) (SAPKK-4) (SAPKK4) (c-Jun N-terminal kinase kinase 2) (JNK kinase 2) (JNKK 2)	MAP2K7 JNKK2 MEK7 MKK7 PRKMK7 SKK4	Homo sapiens (Human)	419
O14757	reviewed	CHK1_HUMAN	Serine/threonine-protein kinase Chk1 (EC 2.7.11.1) (CHK1 checkpoint homolog) (Cell cycle checkpoint kinase) (Checkpoint kinase-1)	CHEK1 CHK1	Homo sapiens (Human)	476
O14874	reviewed	BCKD_HUMAN	Branched-chain alpha-ketoacid dehydrogenase kinase (BCKDH kinase) (BCKDHKIN) (BDK) (EC 2.7.11.1) ([3-methyl-2-oxobutanoate dehydrogenase [lipoamide]] kinase, mitochondrial) (EC 2.7.11.4)	BCKDK	Homo sapiens (Human)	412
O14920	reviewed	IKKB_HUMAN	Inhibitor of nuclear factor kappa-B kinase subunit beta (I-kappa-B-kinase beta) (IKK-B) (IKK-beta) (IkBKB) (EC 2.7.11.10) (I-kappa-B kinase 2) (IKK-2) (IKK2) (Nuclear factor NF-kappa-B inhibitor kinase beta) (NFKBIKB) (Serine/threonine protein kinase IKBKB) (EC 2.7.11.1)	IKBKB IKKB	Homo sapiens (Human)	756
O14936	reviewed	CSKP_HUMAN	Peripheral plasma membrane protein CASK (hCASK) (EC 2.7.11.1) (Calcium/calmodulin-dependent serine protein kinase) (Protein lin-2 homolog)	CASK LIN2	Homo sapiens (Human)	926
O14965	reviewed	AURKA_HUMAN	Aurora kinase A (EC 2.7.11.1) (Aurora 2) (Aurora/IPL1-related kinase 1) (ARK-1) (Aurora-related kinase 1) (Breast tumor-amplified kinase) (Ipl1- and aurora-related kinase 1) (Serine/threonine-protein kinase 15) (Serine/threonine-protein kinase 6) (Serine/threonine-protein kinase Ayk1) (Serine/threonine-protein kinase aurora-A)	AURKA AIK AIRK1 ARK1 AURA AYK1 BTAK IAK1 STK15 STK6	Homo sapiens (Human)	403
O14976	reviewed	GAK_HUMAN	Cyclin-G-associated kinase (EC 2.7.11.1) (DnaJ homolog subfamily C member 26)	GAK DNAJC26	Homo sapiens (Human)	1311
O14986	reviewed	PI51B_HUMAN	Phosphatidylinositol 4-phosphate 5-kinase type-1 beta (PIP5K1-beta) (PtdIns(4)P-5-kinase 1 beta) (EC 2.7.1.68) (Phosphatidylinositol 4-phosphate 5-kinase type I beta) (PIP5KIbeta) (Protein STM-7) (Type I phosphatidylinositol 4-phosphate 5-kinase beta)	PIP5K1B STM7	Homo sapiens (Human)	540
O15021	reviewed	MAST4_HUMAN	Microtubule-associated serine/threonine-protein kinase 4 (EC 2.7.11.1)	MAST4 KIAA0303	Homo sapiens (Human)	2623
O15075	reviewed	DCLK1_HUMAN	Serine/threonine-protein kinase DCLK1 (EC 2.7.11.1) (Doublecortin domain-containing protein 3A) (Doublecortin-like and CAM kinase-like 1) (Doublecortin-like kinase 1)	DCLK1 DCAMKL1 DCDC3A KIAA0369	Homo sapiens (Human)	740
O15111	reviewed	IKKA_HUMAN	Inhibitor of nuclear factor kappa-B kinase subunit alpha (I-kappa-B kinase alpha) (IKK-A) (IKK-alpha) (IkBKA) (IkappaB kinase) (EC 2.7.11.10) (Conserved helix-loop-helix ubiquitous kinase) (I-kappa-B kinase 1) (IKK-1) (IKK1) (Nuclear factor NF-kappa-B inhibitor kinase alpha) (NFKBIKA) (Transcription factor 16) (TCF-16)	CHUK IKKA TCF16	Homo sapiens (Human)	745
O15146	reviewed	MUSK_HUMAN	Muscle, skeletal receptor tyrosine-protein kinase (EC 2.7.10.1) (Muscle-specific tyrosine-protein kinase receptor) (MuSK) (Muscle-specific kinase receptor)	MUSK	Homo sapiens (Human)	869
O15264	reviewed	MK13_HUMAN	Mitogen-activated protein kinase 13 (MAP kinase 13) (MAPK 13) (EC 2.7.11.24) (Mitogen-activated protein kinase p38 delta) (MAP kinase p38 delta) (Stress-activated protein kinase 4)	MAPK13 PRKM13 SAPK4	Homo sapiens (Human)	365
O15530	reviewed	PDPK1_HUMAN	3-phosphoinositide-dependent protein kinase 1 (hPDK1) (EC 2.7.11.1)	PDPK1 PDK1	Homo sapiens (Human)	556
O43252	reviewed	PAPS1_HUMAN	Bifunctional 3'-phosphoadenosine 5'-phosphosulfate synthase 1 (PAPS synthase 1) (PAPSS 1) (Sulfurylase kinase 1) (SK 1) (SK1) [Includes: Sulfate adenylyltransferase (EC 2.7.7.4) (ATP-sulfurylase) (Sulfate adenylate transferase) (SAT); Adenylyl-sulfate kinase (EC 2.7.1.25) (3'-phosphoadenosine-5'-phosphosulfate synthase) (APS kinase) (Adenosine-5'-phosphosulfate 3'-phosphotransferase) (Adenylylsul…	PAPSS1 ATPSK1 PAPSS	Homo sapiens (Human)	624
O43283	reviewed	M3K13_HUMAN	Mitogen-activated protein kinase kinase kinase 13 (EC 2.7.11.25) (Leucine zipper-bearing kinase) (Mixed lineage kinase) (MLK)	MAP3K13 LZK	Homo sapiens (Human)	966
O43293	reviewed	DAPK3_HUMAN	Death-associated protein kinase 3 (DAP kinase 3) (EC 2.7.11.1) (DAP-like kinase) (Dlk) (MYPT1 kinase) (Zipper-interacting protein kinase) (ZIP-kinase)	DAPK3 ZIPK	Homo sapiens (Human)	454
O43314	reviewed	VIP2_HUMAN	Inositol hexakisphosphate and diphosphoinositol-pentakisphosphate kinase 2 (EC 2.7.4.24) (Diphosphoinositol pentakisphosphate kinase 2) (Histidine acid phosphatase domain-containing protein 1) (InsP6 and PP-IP5 kinase 2) (VIP1 homolog 2) (hsVIP2)	PPIP5K2 HISPPD1 KIAA0433 VIP2	Homo sapiens (Human)	1243
O43318	reviewed	M3K7_HUMAN	Mitogen-activated protein kinase kinase kinase 7 (EC 2.7.11.25) (Transforming growth factor-beta-activated kinase 1) (TGF-beta-activated kinase 1)	MAP3K7 TAK1	Homo sapiens (Human)	606
O43353	reviewed	RIPK2_HUMAN	Receptor-interacting serine/threonine-protein kinase 2 (EC 2.7.11.1) (CARD-containing interleukin-1 beta-converting enzyme-associated kinase) (CARD-containing IL-1 beta ICE-kinase) (RIP-like-interacting CLARP kinase) (Receptor-interacting protein 2) (RIP-2) (Tyrosine-protein kinase RIPK2) (EC 2.7.10.2)	RIPK2 CARDIAK RICK RIP2 UNQ277/PRO314/PRO34092	Homo sapiens (Human)	540
O43683	reviewed	BUB1_HUMAN	Mitotic checkpoint serine/threonine-protein kinase BUB1 (hBUB1) (EC 2.7.11.1) (BUB1A)	BUB1 BUB1L	Homo sapiens (Human)	1085
O43781	reviewed	DYRK3_HUMAN	Dual specificity tyrosine-phosphorylation-regulated kinase 3 (EC 2.7.12.1) (Regulatory erythroid kinase) (REDK)	DYRK3	Homo sapiens (Human)	588
O43930	reviewed	PRKY_HUMAN	Putative serine/threonine-protein kinase PRKY (EC 2.7.11.1)	PRKY	Homo sapiens (Human)	277
O60229	reviewed	KALRN_HUMAN	Kalirin (EC 2.7.11.1) (Huntingtin-associated protein-interacting protein) (Protein Duo) (Serine/threonine-protein kinase with Dbl- and pleckstrin homology domain)	KALRN DUET DUO HAPIP TRAD	Homo sapiens (Human)	2986
O60285	reviewed	NUAK1_HUMAN	NUAK family SNF1-like kinase 1 (EC 2.7.11.1) (AMPK-related protein kinase 5) (ARK5) (Omphalocele kinase 1)	NUAK1 ARK5 KIAA0537 OMPHK1	Homo sapiens (Human)	661
O60307	reviewed	MAST3_HUMAN	Microtubule-associated serine/threonine-protein kinase 3 (EC 2.7.11.1)	MAST3 KIAA0561	Homo sapiens (Human)	1309
O60331	reviewed	PI51C_HUMAN	Phosphatidylinositol 4-phosphate 5-kinase type-1 gamma (PIP5K1gamma) (PtdIns(4)P-5-kinase 1 gamma) (EC 2.7.1.68) (Type I phosphatidylinositol 4-phosphate 5-kinase gamma)	PIP5K1C KIAA0589	Homo sapiens (Human)	668
O60566	reviewed	BUB1B_HUMAN	Mitotic checkpoint serine/threonine-protein kinase BUB1 beta (EC 2.7.11.1) (MAD3/BUB1-related protein kinase) (hBUBR1) (Mitotic checkpoint kinase MAD3L) (Protein SSK1)	BUB1B BUBR1 MAD3L SSK1	Homo sapiens (Human)	1050
O60674	reviewed	JAK2_HUMAN	Tyrosine-protein kinase JAK2 (EC 2.7.10.2) (Janus kinase 2) (JAK-2)	JAK2	Homo sapiens (Human)	1132
O60825	reviewed	F262_HUMAN	6-phosphofructo-2-kinase/fructose-2,6-bisphosphatase 2 (6PF-2-K/Fru-2,6-P2ase 2) (PFK/FBPase 2) (6PF-2-K/Fru-2,6-P2ase heart-type isozyme) [Includes: 6-phosphofructo-2-kinase (EC 2.7.1.105); Fructose-2,6-bisphosphatase (EC 3.1.3.46)]	PFKFB2	Homo sapiens (Human)	505
O75063	reviewed	XYLK_HUMAN	Glycosaminoglycan xylosylkinase (EC 2.7.1.-) (Xylose kinase)	FAM20B KIAA0475	Homo sapiens (Human)	409
O75116	reviewed	ROCK2_HUMAN	Rho-associated protein kinase 2 (EC 2.7.11.1) (Rho kinase 2) (Rho-associated, coiled-coil-containing protein kinase 2) (Rho-associated, coiled-coil-containing protein kinase II) (ROCK-II) (p164 ROCK-2)	ROCK2 KIAA0619	Homo sapiens (Human)	1388
O75191	reviewed	XYLB_HUMAN	Xylulose kinase (Xylulokinase) (EC 2.7.1.17)	XYLB	Homo sapiens (Human)	536
O75385	reviewed	ULK1_HUMAN	Serine/threonine-protein kinase ULK1 (EC 2.7.11.1) (Autophagy-related protein 1 homolog) (ATG1) (hATG1) (Unc-51-like kinase 1)	ULK1 KIAA0722	Homo sapiens (Human)	1050
O75414	reviewed	NDK6_HUMAN	Nucleoside diphosphate kinase 6 (NDK 6) (NDP kinase 6) (EC 2.7.4.6) (Inhibitor of p53-induced apoptosis-alpha) (IPIA-alpha) (nm23-H6)	NME6	Homo sapiens (Human)	186
O75460	reviewed	ERN1_HUMAN	Serine/threonine-protein kinase/endoribonuclease IRE1 (Endoplasmic reticulum-to-nucleus signaling 1) (Inositol-requiring protein 1) (hIRE1p) (Ire1-alpha) (IRE1a) [Includes: Serine/threonine-protein kinase (EC 2.7.11.1); Endoribonuclease (EC 3.1.26.-)]	ERN1 IRE1	Homo sapiens (Human)	977
O75582	reviewed	KS6A5_HUMAN	Ribosomal protein S6 kinase alpha-5 (S6K-alpha-5) (EC 2.7.11.1) (90 kDa ribosomal protein S6 kinase 5) (Nuclear mitogen- and stress-activated protein kinase 1) (RSK-like protein kinase) (RSKL)	RPS6KA5 MSK1	Homo sapiens (Human)	802
O75676	reviewed	KS6A4_HUMAN	Ribosomal protein S6 kinase alpha-4 (S6K-alpha-4) (EC 2.7.11.1) (90 kDa ribosomal protein S6 kinase 4) (Nuclear mitogen- and stress-activated protein kinase 2) (Ribosomal protein kinase B) (RSKB)	RPS6KA4 MSK2	Homo sapiens (Human)	772
O75716	reviewed	STK16_HUMAN	Serine/threonine-protein kinase 16 (EC 2.7.11.1) (Myristoylated and palmitoylated serine/threonine-protein kinase) (MPSK) (Protein kinase PKL12) (TGF-beta-stimulated factor 1) (TSF-1) (Tyrosine-protein kinase STK16) (EC 2.7.10.2) (hPSK)	STK16 MPSK1 PKL12 TSF1	Homo sapiens (Human)	305
O75747	reviewed	P3C2G_HUMAN	Phosphatidylinositol 3-kinase C2 domain-containing subunit gamma (PI3K-C2-gamma) (PtdIns-3-kinase C2 subunit gamma) (EC 2.7.1.137) (EC 2.7.1.154) (Phosphoinositide 3-kinase-C2-gamma)	PIK3C2G	Homo sapiens (Human)	1486
O75912	reviewed	DGKI_HUMAN	Diacylglycerol kinase iota (DAG kinase iota) (DGK-iota) (EC 2.7.1.107)	DGKI	Homo sapiens (Human)	1057
O75914	reviewed	PAK3_HUMAN	Serine/threonine-protein kinase PAK 3 (EC 2.7.11.1) (Beta-PAK) (Oligophrenin-3) (p21-activated kinase 3) (PAK-3)	PAK3 OPHN3	Homo sapiens (Human)	559
O75962	reviewed	TRIO_HUMAN	Triple functional domain protein (EC 2.7.11.1) (PTPRF-interacting protein)	TRIO	Homo sapiens (Human)	3097
O76039	reviewed	CDKL5_HUMAN	Cyclin-dependent kinase-like 5 (EC 2.7.11.22) (Serine/threonine-protein kinase 9)	CDKL5 STK9	Homo sapiens (Human)	960
O94768	reviewed	ST17B_HUMAN	Serine/threonine-protein kinase 17B (EC 2.7.11.1) (DAP kinase-related apoptosis-inducing protein kinase 2)	STK17B DRAK2	Homo sapiens (Human)	372
O94804	reviewed	STK10_HUMAN	Serine/threonine-protein kinase 10 (EC 2.7.11.1) (Lymphocyte-oriented kinase)	STK10 LOK	Homo sapiens (Human)	968
O94806	reviewed	KPCD3_HUMAN	Serine/threonine-protein kinase D3 (EC 2.7.11.13) (Protein kinase C nu type) (Protein kinase EPK2) (nPKC-nu)	PRKD3 EPK2 PRKCN	Homo sapiens (Human)	890
O94921	reviewed	CDK14_HUMAN	Cyclin-dependent kinase 14 (EC 2.7.11.22) (Cell division protein kinase 14) (Serine/threonine-protein kinase PFTAIRE-1) (hPFTAIRE1)	CDK14 KIAA0834 PFTK1	Homo sapiens (Human)	469
O95340	reviewed	PAPS2_HUMAN	Bifunctional 3'-phosphoadenosine 5'-phosphosulfate synthase 2 (PAPS synthase 2) (PAPSS 2) (Sulfurylase kinase 2) (SK 2) (SK2) [Includes: Sulfate adenylyltransferase (EC 2.7.7.4) (ATP-sulfurylase) (Sulfate adenylate transferase) (SAT); Adenylyl-sulfate kinase (EC 2.7.1.25) (3'-phosphoadenosine-5'-phosphosulfate synthase) (APS kinase) (Adenosine-5'-phosphosulfate 3'-phosphotransferase) (Adenylylsul…	PAPSS2 ATPSK2	Homo sapiens (Human)	614
O95382	reviewed	M3K6_HUMAN	Mitogen-activated protein kinase kinase kinase 6 (EC 2.7.11.25) (Apoptosis signal-regulating kinase 2)	MAP3K6 ASK2 MAPKKK6 MEKK6	Homo sapiens (Human)	1288
O95544	reviewed	NADK_HUMAN	NAD kinase (EC 2.7.1.23) (Poly(P)/ATP NAD kinase)	NADK	Homo sapiens (Human)	446
O95747	reviewed	OXSR1_HUMAN	Serine/threonine-protein kinase OSR1 (EC 2.7.11.1) (Oxidative stress-responsive 1 protein)	OXSR1 KIAA1101 OSR1	Homo sapiens (Human)	527
O95819	reviewed	M4K4_HUMAN	Mitogen-activated protein kinase kinase kinase kinase 4 (EC 2.7.11.1) (HPK/GCK-like kinase HGK) (MAPK/ERK kinase kinase kinase 4) (MEK kinase kinase 4) (MEKKK 4) (Nck-interacting kinase)	MAP4K4 HGK KIAA0687 NIK	Homo sapiens (Human)	1239
O95835	reviewed	LATS1_HUMAN	Serine/threonine-protein kinase LATS1 (EC 2.7.11.1) (Large tumor suppressor homolog 1) (WARTS protein kinase) (h-warts)	LATS1 WARTS	Homo sapiens (Human)	1130
O96013	reviewed	PAK4_HUMAN	Serine/threonine-protein kinase PAK 4 (EC 2.7.11.1) (p21-activated kinase 4) (PAK-4)	PAK4 KIAA1142	Homo sapiens (Human)	591
O96017	reviewed	CHK2_HUMAN	Serine/threonine-protein kinase Chk2 (EC 2.7.11.1) (CHK2 checkpoint homolog) (Cds1 homolog) (Hucds1) (hCds1) (Checkpoint kinase 2)	CHEK2 CDS1 CHK2 RAD53	Homo sapiens (Human)	543
P00519	reviewed	ABL1_HUMAN	Tyrosine-protein kinase ABL1 (EC 2.7.10.2) (Abelson murine leukemia viral oncogene homolog 1) (Abelson tyrosine-protein kinase 1) (Proto-oncogene c-Abl) (p150)	ABL1 ABL JTK7	Homo sapiens (Human)	1130
P00533	reviewed	EGFR_HUMAN	Epidermal growth factor receptor (EC 2.7.10.1) (Proto-oncogene c-ErbB-1) (Receptor tyrosine-protein kinase erbB-1)	EGFR ERBB ERBB1 HER1	Homo sapiens (Human)	1210
P00540	reviewed	MOS_HUMAN	Proto-oncogene serine/threonine-protein kinase mos (EC 2.7.11.1) (Oocyte maturation factor mos) (Proto-oncogene c-Mos)	MOS	Homo sapiens (Human)	346
P00558	reviewed	PGK1_HUMAN	Phosphoglycerate kinase 1 (EC 2.7.11.1) (EC 2.7.2.3) (Cell migration-inducing gene 10 protein) (Primer recognition protein 2) (PRP 2)	PGK1 PGKA MIG10 OK/SW-cl.110	Homo sapiens (Human)	417
P00568	reviewed	KAD1_HUMAN	Adenylate kinase isoenzyme 1 (AK 1) (EC 2.7.4.3) (EC 2.7.4.4) (EC 2.7.4.6) (ATP-AMP transphosphorylase 1) (ATP:AMP phosphotransferase) (Adenylate monophosphate kinase) (Myokinase)	AK1	Homo sapiens (Human)	194
P04049	reviewed	RAF1_HUMAN	RAF proto-oncogene serine/threonine-protein kinase (EC 2.7.11.1) (Proto-oncogene c-RAF) (cRaf) (Raf-1)	RAF1 RAF	Homo sapiens (Human)	648
P04183	reviewed	KITH_HUMAN	Thymidine kinase, cytosolic (EC 2.7.1.21)	TK1	Homo sapiens (Human)	234
P04626	reviewed	ERBB2_HUMAN	Receptor tyrosine-protein kinase erbB-2 (EC 2.7.10.1) (Metastatic lymph node gene 19 protein) (MLN 19) (Proto-oncogene Neu) (Proto-oncogene c-ErbB-2) (Tyrosine kinase-type cell surface receptor HER2) (p185erbB2) (CD antigen CD340)	ERBB2 HER2 MLN19 NEU NGL	Homo sapiens (Human)	1255
P04629	reviewed	NTRK1_HUMAN	High affinity nerve growth factor receptor (EC 2.7.10.1) (Neurotrophic tyrosine kinase receptor type 1) (TRK1-transforming tyrosine kinase protein) (Tropomyosin-related kinase A) (Tyrosine kinase receptor) (Tyrosine kinase receptor A) (Trk-A) (gp140trk) (p140-TrkA)	NTRK1 MTC TRK TRKA	Homo sapiens (Human)	796
P05129	reviewed	KPCG_HUMAN	Protein kinase C gamma type (PKC-gamma) (EC 2.7.11.13)	PRKCG PKCG	Homo sapiens (Human)	697
P05771	reviewed	KPCB_HUMAN	Protein kinase C beta type (PKC-B) (PKC-beta) (EC 2.7.11.13)	PRKCB PKCB PRKCB1	Homo sapiens (Human)	671
P06213	reviewed	INSR_HUMAN	Insulin receptor (IR) (EC 2.7.10.1) (CD antigen CD220) [Cleaved into: Insulin receptor subunit alpha; Insulin receptor subunit beta]	INSR	Homo sapiens (Human)	1382
P06239	reviewed	LCK_HUMAN	Tyrosine-protein kinase Lck (EC 2.7.10.2) (Leukocyte C-terminal Src kinase) (LSK) (Lymphocyte cell-specific protein-tyrosine kinase) (Protein YT16) (Proto-oncogene Lck) (T cell-specific protein-tyrosine kinase) (p56-LCK)	LCK	Homo sapiens (Human)	509
P06241	reviewed	FYN_HUMAN	Tyrosine-protein kinase Fyn (EC 2.7.10.2) (Proto-oncogene Syn) (Proto-oncogene c-Fyn) (Src-like kinase) (SLK) (p59-Fyn)	FYN	Homo sapiens (Human)	537
P06493	reviewed	CDK1_HUMAN	Cyclin-dependent kinase 1 (CDK1) (EC 2.7.11.22) (EC 2.7.11.23) (Cell division control protein 2 homolog) (Cell division protein kinase 1) (p34 protein kinase)	CDK1 CDC2 CDC28A CDKN1 P34CDC2	Homo sapiens (Human)	297
P06732	reviewed	KCRM_HUMAN	Creatine kinase M-type (EC 2.7.3.2) (Creatine kinase M chain) (Creatine phosphokinase M-type) (CPK-M) (M-CK)	CKM CKMM	Homo sapiens (Human)	381
P07205	reviewed	PGK2_HUMAN	Phosphoglycerate kinase 2 (EC 2.7.2.3) (Phosphoglycerate kinase, testis specific)	PGK2 PGKB	Homo sapiens (Human)	417
P07332	reviewed	FES_HUMAN	Tyrosine-protein kinase Fes/Fps (EC 2.7.10.2) (Feline sarcoma/Fujinami avian sarcoma oncogene homolog) (Proto-oncogene c-Fes) (Proto-oncogene c-Fps) (p93c-fes)	FES FPS	Homo sapiens (Human)	822
P07333	reviewed	CSF1R_HUMAN	Macrophage colony-stimulating factor 1 receptor (CSF-1 receptor) (CSF-1-R) (CSF-1R) (M-CSF-R) (EC 2.7.10.1) (Proto-oncogene c-Fms) (CD antigen CD115)	CSF1R FMS	Homo sapiens (Human)	972
P07947	reviewed	YES_HUMAN	Tyrosine-protein kinase Yes (EC 2.7.10.2) (Proto-oncogene c-Yes) (p61-Yes)	YES1 YES	Homo sapiens (Human)	543
P07948	reviewed	LYN_HUMAN	Tyrosine-protein kinase Lyn (EC 2.7.10.2) (Lck/Yes-related novel protein tyrosine kinase) (V-yes-1 Yamaguchi sarcoma viral related oncogene homolog) (p53Lyn) (p56Lyn)	LYN JTK8	Homo sapiens (Human)	512
P07949	reviewed	RET_HUMAN	Proto-oncogene tyrosine-protein kinase receptor Ret (EC 2.7.10.1) (Cadherin family member 12) (Proto-oncogene c-Ret) [Cleaved into: Soluble RET kinase fragment; Extracellular cell-membrane anchored RET cadherin 120 kDa fragment]	RET CDHF12 CDHR16 PTC	Homo sapiens (Human)	1114
P08069	reviewed	IGF1R_HUMAN	Insulin-like growth factor 1 receptor (EC 2.7.10.1) (Insulin-like growth factor I receptor) (IGF-I receptor) (CD antigen CD221) [Cleaved into: Insulin-like growth factor 1 receptor alpha chain; Insulin-like growth factor 1 receptor beta chain]	IGF1R	Homo sapiens (Human)	1367
P08237	reviewed	PFKAM_HUMAN	ATP-dependent 6-phosphofructokinase, muscle type (ATP-PFK) (PFK-M) (EC 2.7.1.11) (6-phosphofructokinase type A) (Phosphofructo-1-kinase isozyme A) (PFK-A) (Phosphohexokinase)	PFKM PFKX	Homo sapiens (Human)	780
P08581	reviewed	MET_HUMAN	Hepatocyte growth factor receptor (HGF receptor) (EC 2.7.10.1) (HGF/SF receptor) (Proto-oncogene c-Met) (Scatter factor receptor) (SF receptor) (Tyrosine-protein kinase Met)	MET	Homo sapiens (Human)	1390
P08631	reviewed	HCK_HUMAN	Tyrosine-protein kinase HCK (EC 2.7.10.2) (Hematopoietic cell kinase) (Hemopoietic cell kinase) (p59-HCK/p60-HCK) (p59Hck) (p61Hck)	HCK	Homo sapiens (Human)	526
P08922	reviewed	ROS1_HUMAN	Proto-oncogene tyrosine-protein kinase ROS (EC 2.7.10.1) (Proto-oncogene c-Ros) (Proto-oncogene c-Ros-1) (Receptor tyrosine kinase c-ros oncogene 1) (c-Ros receptor tyrosine kinase)	ROS1 MCF3 ROS	Homo sapiens (Human)	2347
P09619	reviewed	PGFRB_HUMAN	Platelet-derived growth factor receptor beta (PDGF-R-beta) (PDGFR-beta) (EC 2.7.10.1) (Beta platelet-derived growth factor receptor) (Beta-type platelet-derived growth factor receptor) (CD140 antigen-like family member B) (Platelet-derived growth factor receptor 1) (PDGFR-1) (CD antigen CD140b)	PDGFRB PDGFR PDGFR1	Homo sapiens (Human)	1106
P09769	reviewed	FGR_HUMAN	Tyrosine-protein kinase Fgr (EC 2.7.10.2) (Gardner-Rasheed feline sarcoma viral (v-fgr) oncogene homolog) (Proto-oncogene c-Fgr) (p55-Fgr) (p58-Fgr) (p58c-Fgr)	FGR SRC2	Homo sapiens (Human)	529
P0C1S8	reviewed	WEE2_HUMAN	Wee1-like protein kinase 2 (EC 2.7.10.2) (Wee1-like protein kinase 1B) (Wee1B kinase)	WEE2 WEE1B	Homo sapiens (Human)	567
P0C263	reviewed	SBK2_HUMAN	Serine/threonine-protein kinase SBK2 (EC 2.7.11.1) (SH3 domain-binding kinase family member 2) (Sugen kinase 69) (SgK069)	SBK2 SGK069	Homo sapiens (Human)	348
P0C264	reviewed	SBK3_HUMAN	Uncharacterized serine/threonine-protein kinase SBK3 (EC 2.7.11.1) (SH3 domain-binding kinase family member 3) (Sugen kinase 110)	SBK3 SGK110	Homo sapiens (Human)	359
P10398	reviewed	ARAF_HUMAN	Serine/threonine-protein kinase A-Raf (EC 2.7.11.1) (Proto-oncogene A-Raf) (Proto-oncogene A-Raf-1) (Proto-oncogene Pks)	ARAF ARAF1 PKS PKS2	Homo sapiens (Human)	606
P10721	reviewed	KIT_HUMAN	Mast/stem cell growth factor receptor Kit (SCFR) (EC 2.7.10.1) (Piebald trait protein) (PBT) (Proto-oncogene c-Kit) (Tyrosine-protein kinase Kit) (p145 c-kit) (v-kit Hardy-Zuckerman 4 feline sarcoma viral oncogene homolog) (CD antigen CD117)	KIT SCFR	Homo sapiens (Human)	976
P11274	reviewed	BCR_HUMAN	Breakpoint cluster region protein (EC 2.7.11.1) (Renal carcinoma antigen NY-REN-26)	BCR BCR1 D22S11	Homo sapiens (Human)	1271
P11309	reviewed	PIM1_HUMAN	Serine/threonine-protein kinase pim-1 (EC 2.7.11.1)	PIM1	Homo sapiens (Human)	313
P11362	reviewed	FGFR1_HUMAN	Fibroblast growth factor receptor 1 (FGFR-1) (EC 2.7.10.1) (Basic fibroblast growth factor receptor 1) (BFGFR) (bFGF-R-1) (Fms-like tyrosine kinase 2) (FLT-2) (N-sam) (Proto-oncogene c-Fgr) (CD antigen CD331)	FGFR1 BFGFR CEK FGFBR FLG FLT2 HBGFR	Homo sapiens (Human)	822
P11801	reviewed	KPSH1_HUMAN	Serine/threonine-protein kinase H1 (EC 2.7.11.1) (Protein serine kinase H1) (PSK-H1)	PSKH1	Homo sapiens (Human)	424
P11802	reviewed	CDK4_HUMAN	Cyclin-dependent kinase 4 (EC 2.7.11.22) (Cell division protein kinase 4) (PSK-J3)	CDK4	Homo sapiens (Human)	303
P11908	reviewed	PRPS2_HUMAN	Ribose-phosphate pyrophosphokinase 2 (EC 2.7.6.1) (PPRibP) (Phosphoribosyl pyrophosphate synthase II) (PRS-II)	PRPS2	Homo sapiens (Human)	318
P12277	reviewed	KCRB_HUMAN	Creatine kinase B-type (EC 2.7.3.2) (Brain creatine kinase) (B-CK) (Creatine kinase B chain) (Creatine phosphokinase B-type) (CPK-B)	CKB CKBB	Homo sapiens (Human)	381
P12532	reviewed	KCRU_HUMAN	Creatine kinase U-type, mitochondrial (EC 2.7.3.2) (Acidic-type mitochondrial creatine kinase) (Mia-CK) (Ubiquitous mitochondrial creatine kinase) (U-MtCK)	CKMT1A CKMT; CKMT1B CKMT	Homo sapiens (Human)	417
P12931	reviewed	SRC_HUMAN	Proto-oncogene tyrosine-protein kinase Src (EC 2.7.10.2) (Proto-oncogene c-Src) (pp60c-src) (p60-Src)	SRC SRC1	Homo sapiens (Human)	536
P14616	reviewed	INSRR_HUMAN	Insulin receptor-related protein (IRR) (EC 2.7.10.1) (IR-related receptor) [Cleaved into: Insulin receptor-related protein alpha chain; Insulin receptor-related protein beta chain]	INSRR IRR	Homo sapiens (Human)	1297
P14618	reviewed	KPYM_HUMAN	Pyruvate kinase PKM (EC 2.7.1.40) (Cytosolic thyroid hormone-binding protein) (CTHBP) (Opa-interacting protein 3) (OIP-3) (Pyruvate kinase 2/3) (Pyruvate kinase muscle isozyme) (Threonine-protein kinase PKM2) (EC 2.7.11.1) (Thyroid hormone-binding protein 1) (THBP1) (Tumor M2-PK) (Tyrosine-protein kinase PKM2) (EC 2.7.10.2) (p58)	PKM OIP3 PK2 PK3 PKM2	Homo sapiens (Human)	531
P15056	reviewed	BRAF_HUMAN	Serine/threonine-protein kinase B-raf (EC 2.7.11.1) (Proto-oncogene B-Raf) (p94) (v-Raf murine sarcoma viral oncogene homolog B1)	BRAF BRAF1 RAFB1	Homo sapiens (Human)	766
P15531	reviewed	NDKA_HUMAN	Nucleoside diphosphate kinase A (NDK A) (NDP kinase A) (EC 2.7.4.6) (Granzyme A-activated DNase) (GAAD) (Metastasis inhibition factor nm23) (NM23-H1) (Tumor metastatic process-associated protein)	NME1 NDPKA NM23	Homo sapiens (Human)	152
P15735	reviewed	PHKG2_HUMAN	Phosphorylase b kinase gamma catalytic chain, liver/testis isoform (PHK-gamma-LT) (PHK-gamma-T) (EC 2.7.11.19) (PSK-C3) (Phosphorylase kinase subunit gamma-2)	PHKG2	Homo sapiens (Human)	406
P16118	reviewed	F261_HUMAN	6-phosphofructo-2-kinase/fructose-2,6-bisphosphatase 1 (6PF-2-K/Fru-2,6-P2ase 1) (PFK/FBPase 1) (6PF-2-K/Fru-2,6-P2ase liver isozyme) [Includes: 6-phosphofructo-2-kinase (EC 2.7.1.105); Fructose-2,6-bisphosphatase (EC 3.1.3.46)]	PFKFB1 F6PK PFRX	Homo sapiens (Human)	471
P16234	reviewed	PGFRA_HUMAN	Platelet-derived growth factor receptor alpha (PDGF-R-alpha) (PDGFR-alpha) (EC 2.7.10.1) (Alpha platelet-derived growth factor receptor) (Alpha-type platelet-derived growth factor receptor) (CD140 antigen-like family member A) (CD140a antigen) (Platelet-derived growth factor alpha receptor) (Platelet-derived growth factor receptor 2) (PDGFR-2) (CD antigen CD140a)	PDGFRA PDGFR2 RHEPDGFRA	Homo sapiens (Human)	1089
P16591	reviewed	FER_HUMAN	Tyrosine-protein kinase Fer (EC 2.7.10.2) (Feline encephalitis virus-related kinase FER) (Fujinami poultry sarcoma/Feline sarcoma-related protein Fer) (Proto-oncogene c-Fer) (Tyrosine kinase 3) (p94-Fer)	FER TYK3	Homo sapiens (Human)	822
P17252	reviewed	KPCA_HUMAN	Protein kinase C alpha type (PKC-A) (PKC-alpha) (EC 2.7.11.13)	PRKCA PKCA PRKACA	Homo sapiens (Human)	672
P17540	reviewed	KCRS_HUMAN	Creatine kinase S-type, mitochondrial (EC 2.7.3.2) (Basic-type mitochondrial creatine kinase) (Mib-CK) (Sarcomeric mitochondrial creatine kinase) (S-MtCK)	CKMT2	Homo sapiens (Human)	419
P17612	reviewed	KAPCA_HUMAN	cAMP-dependent protein kinase catalytic subunit alpha (PKA C-alpha) (EC 2.7.11.11)	PRKACA PKACA	Homo sapiens (Human)	351
P17858	reviewed	PFKAL_HUMAN	ATP-dependent 6-phosphofructokinase, liver type (ATP-PFK) (PFK-L) (EC 2.7.1.11) (6-phosphofructokinase type B) (Phosphofructo-1-kinase isozyme B) (PFK-B) (Phosphohexokinase)	PFKL	Homo sapiens (Human)	780
P17948	reviewed	VGFR1_HUMAN	Vascular endothelial growth factor receptor 1 (VEGFR-1) (EC 2.7.10.1) (Fms-like tyrosine kinase 1) (FLT-1) (Tyrosine-protein kinase FRT) (Tyrosine-protein kinase receptor FLT) (FLT) (Vascular permeability factor receptor)	FLT1 FLT FRT VEGFR1	Homo sapiens (Human)	1338
P19367	reviewed	HXK1_HUMAN	Hexokinase-1 (EC 2.7.1.1) (Brain form hexokinase) (Hexokinase type I) (HK I) (Hexokinase-A)	HK1	Homo sapiens (Human)	917
P19525	reviewed	E2AK2_HUMAN	Interferon-induced, double-stranded RNA-activated protein kinase (EC 2.7.11.1) (Eukaryotic translation initiation factor 2-alpha kinase 2) (eIF-2A protein kinase 2) (Interferon-inducible RNA-dependent protein kinase) (P1/eIF-2A protein kinase) (Protein kinase RNA-activated) (PKR) (Protein kinase R) (Tyrosine-protein kinase EIF2AK2) (EC 2.7.10.2) (p68 kinase)	EIF2AK2 PKR PRKR	Homo sapiens (Human)	551
P19784	reviewed	CSK22_HUMAN	Casein kinase II subunit alpha' (CK II alpha') (EC 2.7.11.1)	CSNK2A2 CK2A2	Homo sapiens (Human)	350
P20794	reviewed	MAK_HUMAN	Serine/threonine-protein kinase MAK (EC 2.7.11.1) (Male germ cell-associated kinase)	MAK	Homo sapiens (Human)	623
P21108	reviewed	PRPS3_HUMAN	Ribose-phosphate pyrophosphokinase 3 (EC 2.7.6.1) (Phosphoribosyl pyrophosphate synthase 1-like 1) (PRPS1-like 1) (Phosphoribosyl pyrophosphate synthase III) (PRS-III)	PRPS1L1 PRPS3 PRPSL	Homo sapiens (Human)	318
P21127	reviewed	CD11B_HUMAN	Cyclin-dependent kinase 11B (EC 2.7.11.22) (Cell division cycle 2-like protein kinase 1) (CLK-1) (Cell division protein kinase 11B) (Galactosyltransferase-associated protein kinase p58/GTA) (PITSLRE serine/threonine-protein kinase CDC2L1) (p58 CLK-1)	CDK11B CDC2L1 CDK11 PITSLREA PK58	Homo sapiens (Human)	795
P21675	reviewed	TAF1_HUMAN	Transcription initiation factor TFIID subunit 1 (EC 2.3.1.48) (EC 2.7.11.1) (Cell cycle gene 1 protein) (TBP-associated factor 250 kDa) (p250) (Transcription initiation factor TFIID 250 kDa subunit) (TAF(II)250) (TAFII-250) (TAFII250)	TAF1 BA2R CCG1 CCGS TAF2A	Homo sapiens (Human)	1893
P21709	reviewed	EPHA1_HUMAN	Ephrin type-A receptor 1 (hEpha1) (EC 2.7.10.1) (EPH tyrosine kinase) (EPH tyrosine kinase 1) (Erythropoietin-producing hepatoma receptor) (Tyrosine-protein kinase receptor EPH)	EPHA1 EPH EPHT EPHT1	Homo sapiens (Human)	976
P21802	reviewed	FGFR2_HUMAN	Fibroblast growth factor receptor 2 (FGFR-2) (EC 2.7.10.1) (K-sam) (KGFR) (Keratinocyte growth factor receptor) (CD antigen CD332)	FGFR2 BEK KGFR KSAM	Homo sapiens (Human)	821
P21860	reviewed	ERBB3_HUMAN	Receptor tyrosine-protein kinase erbB-3 (EC 2.7.10.1) (Proto-oncogene-like protein c-ErbB-3) (Tyrosine kinase-type cell surface receptor HER3)	ERBB3 HER3	Homo sapiens (Human)	1342
P22392	reviewed	NDKB_HUMAN	Nucleoside diphosphate kinase B (NDK B) (NDP kinase B) (EC 2.7.4.6) (C-myc purine-binding transcription factor PUF) (Histidine protein kinase NDKB) (EC 2.7.13.3) (nm23-H2)	NME2 NM23B	Homo sapiens (Human)	152
P22455	reviewed	FGFR4_HUMAN	Fibroblast growth factor receptor 4 (FGFR-4) (EC 2.7.10.1) (CD antigen CD334)	FGFR4 JTK2 TKF	Homo sapiens (Human)	802
P22607	reviewed	FGFR3_HUMAN	Fibroblast growth factor receptor 3 (FGFR-3) (EC 2.7.10.1) (CD antigen CD333)	FGFR3 JTK4	Homo sapiens (Human)	806
P22612	reviewed	KAPCG_HUMAN	cAMP-dependent protein kinase catalytic subunit gamma (PKA C-gamma) (EC 2.7.11.11)	PRKACG	Homo sapiens (Human)	351
P22694	reviewed	KAPCB_HUMAN	cAMP-dependent protein kinase catalytic subunit beta (PKA C-beta) (EC 2.7.11.11)	PRKACB	Homo sapiens (Human)	351
P23443	reviewed	KS6B1_HUMAN	Ribosomal protein S6 kinase beta-1 (S6K-beta-1) (S6K1) (EC 2.7.11.1) (70 kDa ribosomal protein S6 kinase 1) (P70S6K1) (p70-S6K 1) (Ribosomal protein S6 kinase I) (Serine/threonine-protein kinase 14A) (p70 ribosomal S6 kinase alpha) (p70 S6 kinase alpha) (p70 S6K-alpha) (p70 S6KA)	RPS6KB1 STK14A	Homo sapiens (Human)	525
P23458	reviewed	JAK1_HUMAN	Tyrosine-protein kinase JAK1 (EC 2.7.10.2) (Janus kinase 1) (JAK-1)	JAK1 JAK1A JAK1B	Homo sapiens (Human)	1154
P23677	reviewed	IP3KA_HUMAN	Inositol-trisphosphate 3-kinase A (EC 2.7.1.127) (Inositol 1,4,5-trisphosphate 3-kinase A) (IP3 3-kinase A) (IP3K A) (InsP 3-kinase A)	ITPKA	Homo sapiens (Human)	461
P23743	reviewed	DGKA_HUMAN	Diacylglycerol kinase alpha (DAG kinase alpha) (EC 2.7.1.107) (EC 2.7.1.93) (80 kDa diacylglycerol kinase) (Diglyceride kinase alpha) (DGK-alpha)	DGKA DAGK DAGK1	Homo sapiens (Human)	735
P23919	reviewed	KTHY_HUMAN	Thymidylate kinase (EC 2.7.4.9) (dTMP kinase)	DTYMK CDC8 TMPK TYMK	Homo sapiens (Human)	212
P24723	reviewed	KPCL_HUMAN	Protein kinase C eta type (EC 2.7.11.13) (PKC-L) (nPKC-eta)	PRKCH PKCL PRKCL	Homo sapiens (Human)	683
P24941	reviewed	CDK2_HUMAN	Cyclin-dependent kinase 2 (EC 2.7.11.22) (Cell division protein kinase 2) (p33 protein kinase)	CDK2 CDKN2	Homo sapiens (Human)	298
P25098	reviewed	ARBK1_HUMAN	Beta-adrenergic receptor kinase 1 (Beta-ARK-1) (EC 2.7.11.15) (G-protein coupled receptor kinase 2)	GRK2 ADRBK1 BARK BARK1	Homo sapiens (Human)	689
P27037	reviewed	AVR2A_HUMAN	Activin receptor type-2A (EC 2.7.11.30) (Activin receptor type IIA) (ACTR-IIA) (ACTRIIA)	ACVR2A ACVR2	Homo sapiens (Human)	513
P27144	reviewed	KAD4_HUMAN	Adenylate kinase 4, mitochondrial (EC 2.7.4.4) (EC 2.7.4.6) (Adenylate kinase 3-like) (GTP:AMP phosphotransferase AK4)	AK4 AK3 AK3L1	Homo sapiens (Human)	223
P27361	reviewed	MK03_HUMAN	Mitogen-activated protein kinase 3 (MAP kinase 3) (MAPK 3) (EC 2.7.11.24) (ERT2) (Extracellular signal-regulated kinase 1) (ERK-1) (Insulin-stimulated MAP2 kinase) (MAP kinase isoform p44) (p44-MAPK) (Microtubule-associated protein 2 kinase) (p44-ERK1)	MAPK3 ERK1 PRKM3	Homo sapiens (Human)	379
P27448	reviewed	MARK3_HUMAN	MAP/microtubule affinity-regulating kinase 3 (EC 2.7.11.1) (C-TAK1) (cTAK1) (Cdc25C-associated protein kinase 1) (ELKL motif kinase 2) (EMK-2) (Protein kinase STK10) (Ser/Thr protein kinase PAR-1) (Par-1a) (Serine/threonine-protein kinase p78)	MARK3 CTAK1 EMK2	Homo sapiens (Human)	753
P27707	reviewed	DCK_HUMAN	Deoxycytidine kinase (dCK) (EC 2.7.1.74) (Deoxyadenosine kinase) (EC 2.7.1.76) (Deoxyguanosine kinase) (EC 2.7.1.113)	DCK	Homo sapiens (Human)	260
P27987	reviewed	IP3KB_HUMAN	Inositol-trisphosphate 3-kinase B (EC 2.7.1.127) (Inositol 1,4,5-trisphosphate 3-kinase B) (IP3 3-kinase B) (IP3K B) (InsP 3-kinase B)	ITPKB	Homo sapiens (Human)	946
P28482	reviewed	MK01_HUMAN	Mitogen-activated protein kinase 1 (MAP kinase 1) (MAPK 1) (EC 2.7.11.24) (ERT1) (Extracellular signal-regulated kinase 2) (ERK-2) (MAP kinase isoform p42) (p42-MAPK) (Mitogen-activated protein kinase 2) (MAP kinase 2) (MAPK 2)	MAPK1 ERK2 PRKM1 PRKM2	Homo sapiens (Human)	360
P29317	reviewed	EPHA2_HUMAN	Ephrin type-A receptor 2 (EC 2.7.10.1) (Epithelial cell kinase) (Tyrosine-protein kinase receptor ECK)	EPHA2 ECK	Homo sapiens (Human)	976
P29320	reviewed	EPHA3_HUMAN	Ephrin type-A receptor 3 (EC 2.7.10.1) (EPH-like kinase 4) (EK4) (hEK4) (HEK) (Human embryo kinase) (Tyrosine-protein kinase TYRO4) (Tyrosine-protein kinase receptor ETK1) (Eph-like tyrosine kinase 1)	EPHA3 ETK ETK1 HEK TYRO4	Homo sapiens (Human)	983
P29322	reviewed	EPHA8_HUMAN	Ephrin type-A receptor 8 (EC 2.7.10.1) (EPH- and ELK-related kinase) (EPH-like kinase 3) (EK3) (hEK3) (Tyrosine-protein kinase receptor EEK)	EPHA8 EEK HEK3 KIAA1459	Homo sapiens (Human)	1005
P29323	reviewed	EPHB2_HUMAN	Ephrin type-B receptor 2 (EC 2.7.10.1) (Developmentally-regulated Eph-related tyrosine kinase) (ELK-related tyrosine kinase) (EPH tyrosine kinase 3) (EPH-like kinase 5) (EK5) (hEK5) (Renal carcinoma antigen NY-REN-47) (Tyrosine-protein kinase TYRO5) (Tyrosine-protein kinase receptor EPH-3) [Cleaved into: EphB2/CTF1; EphB2/CTF2]	EPHB2 DRT EPHT3 EPTH3 ERK HEK5 TYRO5	Homo sapiens (Human)	1055
P29376	reviewed	LTK_HUMAN	Leukocyte tyrosine kinase receptor (EC 2.7.10.1) (Protein tyrosine kinase 1)	LTK TYK1	Homo sapiens (Human)	864
P29597	reviewed	TYK2_HUMAN	Non-receptor tyrosine-protein kinase TYK2 (EC 2.7.10.2)	TYK2	Homo sapiens (Human)	1187
P30085	reviewed	KCY_HUMAN	UMP-CMP kinase (EC 2.7.4.14) (Deoxycytidylate kinase) (CK) (dCMP kinase) (Nucleoside-diphosphate kinase) (EC 2.7.4.6) (Uridine monophosphate/cytidine monophosphate kinase) (UMP/CMP kinase) (UMP/CMPK)	CMPK1 CMK CMPK UCK UMK UMPK	Homo sapiens (Human)	196
P30291	reviewed	WEE1_HUMAN	Wee1-like protein kinase (WEE1hu) (EC 2.7.10.2) (Wee1A kinase)	WEE1	Homo sapiens (Human)	646
P30530	reviewed	UFO_HUMAN	Tyrosine-protein kinase receptor UFO (EC 2.7.10.1) (AXL oncogene)	AXL UFO	Homo sapiens (Human)	894
P30613	reviewed	KPYR_HUMAN	Pyruvate kinase PKLR (EC 2.7.1.40) (Pyruvate kinase 1) (Pyruvate kinase isozymes L/R) (R-type/L-type pyruvate kinase) (Red cell/liver pyruvate kinase)	PKLR PK1 PKL	Homo sapiens (Human)	574
P31152	reviewed	MK04_HUMAN	Mitogen-activated protein kinase 4 (MAP kinase 4) (MAPK 4) (EC 2.7.11.24) (Extracellular signal-regulated kinase 4) (ERK-4) (MAP kinase isoform p63) (p63-MAPK)	MAPK4 ERK4 PRKM4	Homo sapiens (Human)	587
P31749	reviewed	AKT1_HUMAN	RAC-alpha serine/threonine-protein kinase (EC 2.7.11.1) (Protein kinase B) (PKB) (Protein kinase B alpha) (PKB alpha) (Proto-oncogene c-Akt) (RAC-PK-alpha)	AKT1 PKB RAC	Homo sapiens (Human)	480
P31751	reviewed	AKT2_HUMAN	RAC-beta serine/threonine-protein kinase (EC 2.7.11.1) (Protein kinase Akt-2) (Protein kinase B beta) (PKB beta) (RAC protein kinase beta) (RAC-PK-beta)	AKT2	Homo sapiens (Human)	481
P32189	reviewed	GLPK_HUMAN	Glycerol kinase (Glycerokinase) (EC 2.7.1.30) (ATP:glycerol 3-phosphotransferase)	GK	Homo sapiens (Human)	559
P32298	reviewed	GRK4_HUMAN	G protein-coupled receptor kinase 4 (EC 2.7.11.16) (G protein-coupled receptor kinase GRK4) (ITI1)	GRK4 GPRK2L GPRK4	Homo sapiens (Human)	578
P33076	reviewed	C2TA_HUMAN	MHC class II transactivator (CIITA) (EC 2.3.1.-) (EC 2.7.11.1)	CIITA MHC2TA	Homo sapiens (Human)	1130
P33981	reviewed	TTK_HUMAN	Dual specificity protein kinase TTK (EC 2.7.12.1) (Phosphotyrosine picked threonine-protein kinase) (PYT)	TTK MPS1 MPS1L1	Homo sapiens (Human)	857
P34925	reviewed	RYK_HUMAN	Tyrosine-protein kinase RYK (EC 2.7.10.1)	RYK JTK5A	Homo sapiens (Human)	607
P34947	reviewed	GRK5_HUMAN	G protein-coupled receptor kinase 5 (EC 2.7.11.16) (G protein-coupled receptor kinase GRK5)	GRK5 GPRK5	Homo sapiens (Human)	590
P35557	reviewed	HXK4_HUMAN	Hexokinase-4 (HK4) (EC 2.7.1.1) (Glucokinase) (Hexokinase type IV) (HK IV) (Hexokinase-D)	GCK	Homo sapiens (Human)	465
P35558	reviewed	PCKGC_HUMAN	Phosphoenolpyruvate carboxykinase, cytosolic [GTP] (PEPCK-C) (EC 4.1.1.32) (Serine-protein kinase PCK1) (EC 2.7.11.-)	PCK1 PEPCK1	Homo sapiens (Human)	622
P35590	reviewed	TIE1_HUMAN	Tyrosine-protein kinase receptor Tie-1 (EC 2.7.10.1)	TIE1 TIE	Homo sapiens (Human)	1138
P35626	reviewed	ARBK2_HUMAN	G protein-coupled receptor kinase 3 (EC 2.7.11.15) (Beta-adrenergic receptor kinase 2) (Beta-ARK-2)	GRK3 ADRBK2 BARK2	Homo sapiens (Human)	688
P35790	reviewed	CHKA_HUMAN	Choline kinase alpha (CK) (EC 2.7.1.32) (CHETK-alpha) (Ethanolamine kinase) (EK) (EC 2.7.1.82)	CHKA CHK CKI	Homo sapiens (Human)	457
P35916	reviewed	VGFR3_HUMAN	Vascular endothelial growth factor receptor 3 (VEGFR-3) (EC 2.7.10.1) (Fms-like tyrosine kinase 4) (FLT-4) (Tyrosine-protein kinase receptor FLT4)	FLT4 VEGFR3	Homo sapiens (Human)	1363
P35968	reviewed	VGFR2_HUMAN	Vascular endothelial growth factor receptor 2 (VEGFR-2) (EC 2.7.10.1) (Fetal liver kinase 1) (FLK-1) (Kinase insert domain receptor) (KDR) (Protein-tyrosine kinase receptor flk-1) (CD antigen CD309)	KDR FLK1 VEGFR2	Homo sapiens (Human)	1356
P36507	reviewed	MP2K2_HUMAN	Dual specificity mitogen-activated protein kinase kinase 2 (MAP kinase kinase 2) (MAPKK 2) (EC 2.7.12.2) (ERK activator kinase 2) (MAPK/ERK kinase 2) (MEK 2)	MAP2K2 MEK2 MKK2 PRKMK2	Homo sapiens (Human)	400
P36888	reviewed	FLT3_HUMAN	Receptor-type tyrosine-protein kinase FLT3 (EC 2.7.10.1) (FL cytokine receptor) (Fetal liver kinase-2) (FLK-2) (Fms-like tyrosine kinase 3) (FLT-3) (Stem cell tyrosine kinase 1) (STK-1) (CD antigen CD135)	FLT3 CD135 FLK2 STK1	Homo sapiens (Human)	993
P36894	reviewed	BMR1A_HUMAN	Bone morphogenetic protein receptor type-1A (BMP type-1A receptor) (BMPR-1A) (EC 2.7.11.30) (Activin receptor-like kinase 3) (ALK-3) (Serine/threonine-protein kinase receptor R5) (SKR5) (CD antigen CD292)	BMPR1A ACVRLK3 ALK3	Homo sapiens (Human)	532
P36896	reviewed	ACV1B_HUMAN	Activin receptor type-1B (EC 2.7.11.30) (Activin receptor type IB) (ACTR-IB) (Activin receptor-like kinase 4) (ALK-4) (Serine/threonine-protein kinase receptor R2) (SKR2)	ACVR1B ACVRLK4 ALK4	Homo sapiens (Human)	505
P36897	reviewed	TGFR1_HUMAN	TGF-beta receptor type-1 (TGFR-1) (EC 2.7.11.30) (Activin A receptor type II-like protein kinase of 53kD) (Activin receptor-like kinase 5) (ALK-5) (ALK5) (Serine/threonine-protein kinase receptor R4) (SKR4) (TGF-beta type I receptor) (Transforming growth factor-beta receptor type I) (TGF-beta receptor type I) (TbetaR-I)	TGFBR1 ALK5 SKR4	Homo sapiens (Human)	503
P37023	reviewed	ACVL1_HUMAN	Activin receptor type-1-like (EC 2.7.11.30) (Activin receptor-like kinase 1) (ALK-1) (Serine/threonine-protein kinase receptor R3) (SKR3) (TGF-B superfamily receptor type I) (TSR-I)	ACVRL1 ACVRLK1 ALK1	Homo sapiens (Human)	503
P37173	reviewed	TGFR2_HUMAN	TGF-beta receptor type-2 (TGFR-2) (EC 2.7.11.30) (TGF-beta type II receptor) (Transforming growth factor-beta receptor type II) (TGF-beta receptor type II) (TbetaR-II)	TGFBR2	Homo sapiens (Human)	567
P41240	reviewed	CSK_HUMAN	Tyrosine-protein kinase CSK (EC 2.7.10.2) (C-Src kinase) (Protein-tyrosine kinase CYL)	CSK	Homo sapiens (Human)	450
P41279	reviewed	M3K8_HUMAN	Mitogen-activated protein kinase kinase kinase 8 (EC 2.7.11.25) (Cancer Osaka thyroid oncogene) (Proto-oncogene c-Cot) (Serine/threonine-protein kinase cot) (Tumor progression locus 2) (TPL-2)	MAP3K8 COT ESTF	Homo sapiens (Human)	467
P41743	reviewed	KPCI_HUMAN	Protein kinase C iota type (EC 2.7.11.13) (Atypical protein kinase C-lambda/iota) (PRKC-lambda/iota) (aPKC-lambda/iota) (nPKC-iota)	PRKCI DXS1179E	Homo sapiens (Human)	596
P42336	reviewed	PK3CA_HUMAN	Phosphatidylinositol 4,5-bisphosphate 3-kinase catalytic subunit alpha isoform (PI3-kinase subunit alpha) (PI3K-alpha) (PI3Kalpha) (PtdIns-3-kinase subunit alpha) (EC 2.7.1.137) (EC 2.7.1.153) (Phosphatidylinositol 4,5-bisphosphate 3-kinase 110 kDa catalytic subunit alpha) (PtdIns-3-kinase subunit p110-alpha) (p110alpha) (Phosphoinositide 3-kinase alpha) (Phosphoinositide-3-kinase catalytic alpha…	PIK3CA	Homo sapiens (Human)	1068
P42338	reviewed	PK3CB_HUMAN	Phosphatidylinositol 4,5-bisphosphate 3-kinase catalytic subunit beta isoform (PI3-kinase subunit beta) (PI3K-beta) (PI3Kbeta) (PtdIns-3-kinase subunit beta) (EC 2.7.1.153) (Phosphatidylinositol 4,5-bisphosphate 3-kinase 110 kDa catalytic subunit beta) (PtdIns-3-kinase subunit p110-beta) (p110beta) (Serine/threonine protein kinase PIK3CB) (EC 2.7.11.1)	PIK3CB PIK3C1	Homo sapiens (Human)	1070
P42345	reviewed	MTOR_HUMAN	Serine/threonine-protein kinase mTOR (EC 2.7.11.1) (FK506-binding protein 12-rapamycin complex-associated protein 1) (FKBP12-rapamycin complex-associated protein) (Mammalian target of rapamycin) (mTOR) (Mechanistic target of rapamycin) (Rapamycin and FKBP12 target 1) (Rapamycin target protein 1) (Tyrosine-protein kinase mTOR) (EC 2.7.10.2)	MTOR FRAP FRAP1 FRAP2 RAFT1 RAPT1	Homo sapiens (Human)	2549
P42356	reviewed	PI4KA_HUMAN	Phosphatidylinositol 4-kinase alpha (PI4-kinase alpha) (PI4K-alpha) (PtdIns-4-kinase alpha) (EC 2.7.1.67) (Phosphatidylinositol 4-Kinase III alpha)	PI4KA PIK4 PIK4CA	Homo sapiens (Human)	2102
P42679	reviewed	MATK_HUMAN	Megakaryocyte-associated tyrosine-protein kinase (EC 2.7.10.2) (CSK homologous kinase) (CHK) (Hematopoietic consensus tyrosine-lacking kinase) (Protein kinase HYL) (Tyrosine-protein kinase CTK)	MATK CTK HYL	Homo sapiens (Human)	507
P42680	reviewed	TEC_HUMAN	Tyrosine-protein kinase Tec (EC 2.7.10.2)	TEC PSCTK4	Homo sapiens (Human)	631
P42681	reviewed	TXK_HUMAN	Tyrosine-protein kinase TXK (EC 2.7.10.2) (Protein-tyrosine kinase 4) (Resting lymphocyte kinase)	TXK PTK4 RLK	Homo sapiens (Human)	527
P42684	reviewed	ABL2_HUMAN	Tyrosine-protein kinase ABL2 (EC 2.7.10.2) (Abelson murine leukemia viral oncogene homolog 2) (Abelson tyrosine-protein kinase 2) (Abelson-related gene protein) (Tyrosine-protein kinase ARG)	ABL2 ABLL ARG	Homo sapiens (Human)	1182
P42685	reviewed	FRK_HUMAN	Tyrosine-protein kinase FRK (EC 2.7.10.2) (FYN-related kinase) (Nuclear tyrosine protein kinase RAK) (Protein-tyrosine kinase 5)	FRK PTK5 RAK	Homo sapiens (Human)	505
P43250	reviewed	GRK6_HUMAN	G protein-coupled receptor kinase 6 (EC 2.7.11.16) (G protein-coupled receptor kinase GRK6)	GRK6 GPRK6	Homo sapiens (Human)	576
P43403	reviewed	ZAP70_HUMAN	Tyrosine-protein kinase ZAP-70 (EC 2.7.10.2) (70 kDa zeta-chain associated protein) (Syk-related tyrosine kinase)	ZAP70 SRK	Homo sapiens (Human)	619
P43405	reviewed	KSYK_HUMAN	Tyrosine-protein kinase SYK (EC 2.7.10.2) (Spleen tyrosine kinase) (p72-Syk)	SYK	Homo sapiens (Human)	635
P45983	reviewed	MK08_HUMAN	Mitogen-activated protein kinase 8 (MAP kinase 8) (MAPK 8) (EC 2.7.11.24) (JNK-46) (Stress-activated protein kinase 1c) (SAPK1c) (Stress-activated protein kinase JNK1) (c-Jun N-terminal kinase 1)	MAPK8 JNK1 PRKM8 SAPK1 SAPK1C	Homo sapiens (Human)	427
P45984	reviewed	MK09_HUMAN	Mitogen-activated protein kinase 9 (MAP kinase 9) (MAPK 9) (EC 2.7.11.24) (JNK-55) (Stress-activated protein kinase 1a) (SAPK1a) (Stress-activated protein kinase JNK2) (c-Jun N-terminal kinase 2)	MAPK9 JNK2 PRKM9 SAPK1A	Homo sapiens (Human)	424
P45985	reviewed	MP2K4_HUMAN	Dual specificity mitogen-activated protein kinase kinase 4 (MAP kinase kinase 4) (MAPKK 4) (EC 2.7.12.2) (JNK-activating kinase 1) (MAPK/ERK kinase 4) (MEK 4) (SAPK/ERK kinase 1) (SEK1) (Stress-activated protein kinase kinase 1) (SAPK kinase 1) (SAPKK-1) (SAPKK1) (c-Jun N-terminal kinase kinase 1) (JNKK)	MAP2K4 JNKK1 MEK4 MKK4 PRKMK4 SEK1 SERK1 SKK1	Homo sapiens (Human)	399
P46734	reviewed	MP2K3_HUMAN	Dual specificity mitogen-activated protein kinase kinase 3 (MAP kinase kinase 3) (MAPKK 3) (EC 2.7.12.2) (MAPK/ERK kinase 3) (MEK 3) (Stress-activated protein kinase kinase 2) (SAPK kinase 2) (SAPKK-2) (SAPKK2)	MAP2K3 MEK3 MKK3 PRKMK3 SKK2	Homo sapiens (Human)	347
P48426	reviewed	PI42A_HUMAN	Phosphatidylinositol 5-phosphate 4-kinase type-2 alpha (EC 2.7.1.149) (1-phosphatidylinositol 5-phosphate 4-kinase 2-alpha) (Diphosphoinositide kinase 2-alpha) (PIP5KIII) (Phosphatidylinositol 5-Phosphate 4-Kinase) (PI5P4Kalpha) (Phosphatidylinositol 5-phosphate 4-kinase type II alpha) (PI(5)P 4-kinase type II alpha) (PIP4KII-alpha) (PtdIns(4)P-5-kinase B isoform) (PtdIns(4)P-5-kinase C isoform) …	PIP4K2A PI5P4KA PIP5K2 PIP5K2A	Homo sapiens (Human)	406
P48729	reviewed	KC1A_HUMAN	Casein kinase I isoform alpha (CKI-alpha) (EC 2.7.11.1) (CK1)	CSNK1A1	Homo sapiens (Human)	337
P48730	reviewed	KC1D_HUMAN	Casein kinase I isoform delta (CKI-delta) (CKId) (EC 2.7.11.1) (Tau-protein kinase CSNK1D) (EC 2.7.11.26)	CSNK1D HCKID	Homo sapiens (Human)	415
P48736	reviewed	PK3CG_HUMAN	Phosphatidylinositol 4,5-bisphosphate 3-kinase catalytic subunit gamma isoform (PI3-kinase subunit gamma) (PI3K-gamma) (PI3Kgamma) (PtdIns-3-kinase subunit gamma) (EC 2.7.1.137) (EC 2.7.1.153) (EC 2.7.1.154) (Phosphatidylinositol 4,5-bisphosphate 3-kinase 110 kDa catalytic subunit gamma) (PtdIns-3-kinase subunit p110-gamma) (p110gamma) (Phosphoinositide-3-kinase catalytic gamma polypeptide) (Seri…	PIK3CG	Homo sapiens (Human)	1102
P49137	reviewed	MAPK2_HUMAN	MAP kinase-activated protein kinase 2 (MAPK-activated protein kinase 2) (MAPKAP kinase 2) (MAPKAP-K2) (MAPKAPK-2) (MK-2) (MK2) (EC 2.7.11.1)	MAPKAPK2	Homo sapiens (Human)	400
P49336	reviewed	CDK8_HUMAN	Cyclin-dependent kinase 8 (EC 2.7.11.22) (EC 2.7.11.23) (Cell division protein kinase 8) (Mediator complex subunit CDK8) (Mediator of RNA polymerase II transcription subunit CDK8) (Protein kinase K35)	CDK8	Homo sapiens (Human)	464
P49619	reviewed	DGKG_HUMAN	Diacylglycerol kinase gamma (DAG kinase gamma) (EC 2.7.1.107) (Diglyceride kinase gamma) (DGK-gamma)	DGKG DAGK3	Homo sapiens (Human)	791
P49674	reviewed	KC1E_HUMAN	Casein kinase I isoform epsilon (CKI-epsilon) (CKIe) (EC 2.7.11.1)	CSNK1E	Homo sapiens (Human)	416
P49759	reviewed	CLK1_HUMAN	Dual specificity protein kinase CLK1 (EC 2.7.12.1) (CDC-like kinase 1)	CLK1 CLK	Homo sapiens (Human)	484
P49760	reviewed	CLK2_HUMAN	Dual specificity protein kinase CLK2 (EC 2.7.12.1) (CDC-like kinase 2)	CLK2	Homo sapiens (Human)	499
P49761	reviewed	CLK3_HUMAN	Dual specificity protein kinase CLK3 (EC 2.7.12.1) (CDC-like kinase 3)	CLK3	Homo sapiens (Human)	490
P49840	reviewed	GSK3A_HUMAN	Glycogen synthase kinase-3 alpha (GSK-3 alpha) (EC 2.7.11.26) (Serine/threonine-protein kinase GSK3A) (EC 2.7.11.1)	GSK3A	Homo sapiens (Human)	483
P49841	reviewed	GSK3B_HUMAN	Glycogen synthase kinase-3 beta (GSK-3 beta) (EC 2.7.11.26) (Serine/threonine-protein kinase GSK3B) (EC 2.7.11.1)	GSK3B	Homo sapiens (Human)	420
P49842	reviewed	STK19_HUMAN	Inactive serine/threonine-protein kinase 19 (Protein G11) (Protein RP1)	STK19 G11 RP1	Homo sapiens (Human)	254
P49903	reviewed	SPS1_HUMAN	Selenide, water dikinase 1 (EC 2.7.9.3) (Selenium donor protein 1) (Selenophosphate synthase 1)	SEPHS1 SELD SPS SPS1	Homo sapiens (Human)	392
P50053	reviewed	KHK_HUMAN	Ketohexokinase (EC 2.7.1.3) (Hepatic fructokinase)	KHK	Homo sapiens (Human)	298
P50613	reviewed	CDK7_HUMAN	Cyclin-dependent kinase 7 (EC 2.7.11.22) (EC 2.7.11.23) (39 kDa protein kinase) (p39 Mo15) (CDK-activating kinase 1) (Cell division protein kinase 7) (Serine/threonine-protein kinase 1) (TFIIH basal transcription factor complex kinase subunit)	CDK7 CAK CAK1 CDKN7 MO15 STK1	Homo sapiens (Human)	346
P50750	reviewed	CDK9_HUMAN	Cyclin-dependent kinase 9 (EC 2.7.11.22) (EC 2.7.11.23) (C-2K) (Cell division cycle 2-like protein kinase 4) (Cell division protein kinase 9) (Serine/threonine-protein kinase PITALRE) (Tat-associated kinase complex catalytic subunit)	CDK9 CDC2L4 TAK	Homo sapiens (Human)	372
P51451	reviewed	BLK_HUMAN	Tyrosine-protein kinase Blk (EC 2.7.10.2) (B lymphocyte kinase) (p55-Blk)	BLK	Homo sapiens (Human)	505
P51570	reviewed	GALK1_HUMAN	Galactokinase (EC 2.7.1.6) (Galactose kinase)	GALK1 GALK	Homo sapiens (Human)	392
P51617	reviewed	IRAK1_HUMAN	Interleukin-1 receptor-associated kinase 1 (IRAK-1) (EC 2.7.11.1)	IRAK1 IRAK	Homo sapiens (Human)	712
P51812	reviewed	KS6A3_HUMAN	Ribosomal protein S6 kinase alpha-3 (S6K-alpha-3) (EC 2.7.11.1) (90 kDa ribosomal protein S6 kinase 3) (p90-RSK 3) (p90RSK3) (Insulin-stimulated protein kinase 1) (ISPK-1) (MAP kinase-activated protein kinase 1b) (MAPK-activated protein kinase 1b) (MAPKAP kinase 1b) (MAPKAPK-1b) (Ribosomal S6 kinase 2) (RSK-2) (pp90RSK2)	RPS6KA3 ISPK1 MAPKAPK1B RSK2	Homo sapiens (Human)	740
P51813	reviewed	BMX_HUMAN	Cytoplasmic tyrosine-protein kinase BMX (EC 2.7.10.2) (Bone marrow tyrosine kinase gene in chromosome X protein) (Epithelial and endothelial tyrosine kinase) (ETK) (NTK38)	BMX	Homo sapiens (Human)	675
P51817	reviewed	PRKX_HUMAN	cAMP-dependent protein kinase catalytic subunit PRKX (PrKX) (Protein kinase X) (Protein kinase X-linked) (Serine/threonine-protein kinase PRKX) (EC 2.7.11.1) (Protein kinase PKX1)	PRKX PKX1	Homo sapiens (Human)	358
P51955	reviewed	NEK2_HUMAN	Serine/threonine-protein kinase Nek2 (EC 2.7.11.1) (HSPK 21) (Never in mitosis A-related kinase 2) (NimA-related protein kinase 2) (NimA-like protein kinase 1)	NEK2 NEK2A NLK1	Homo sapiens (Human)	445
P51956	reviewed	NEK3_HUMAN	Serine/threonine-protein kinase Nek3 (EC 2.7.11.1) (HSPK 36) (Never in mitosis A-related kinase 3) (NimA-related protein kinase 3)	NEK3	Homo sapiens (Human)	506
P51957	reviewed	NEK4_HUMAN	Serine/threonine-protein kinase Nek4 (EC 2.7.11.1) (Never in mitosis A-related kinase 4) (NimA-related protein kinase 4) (Serine/threonine-protein kinase 2) (Serine/threonine-protein kinase NRK2)	NEK4 STK2	Homo sapiens (Human)	841
P52333	reviewed	JAK3_HUMAN	Tyrosine-protein kinase JAK3 (EC 2.7.10.2) (Janus kinase 3) (JAK-3) (Leukocyte janus kinase) (L-JAK)	JAK3	Homo sapiens (Human)	1124
P52429	reviewed	DGKE_HUMAN	Diacylglycerol kinase epsilon (DAG kinase epsilon) (EC 2.7.1.107) (Diglyceride kinase epsilon) (DGK-epsilon)	DGKE DAGK5	Homo sapiens (Human)	567
P52564	reviewed	MP2K6_HUMAN	Dual specificity mitogen-activated protein kinase kinase 6 (MAP kinase kinase 6) (MAPKK 6) (EC 2.7.12.2) (MAPK/ERK kinase 6) (MEK 6) (Stress-activated protein kinase kinase 3) (SAPK kinase 3) (SAPKK-3) (SAPKK3)	MAP2K6 MEK6 MKK6 PRKMK6 SKK3	Homo sapiens (Human)	334
P52789	reviewed	HXK2_HUMAN	Hexokinase-2 (EC 2.7.1.1) (Hexokinase type II) (HK II) (Hexokinase-B) (Muscle form hexokinase)	HK2	Homo sapiens (Human)	917
P52790	reviewed	HXK3_HUMAN	Hexokinase-3 (EC 2.7.1.1) (Hexokinase type III) (HK III) (Hexokinase-C)	HK3	Homo sapiens (Human)	923
P52824	reviewed	DGKQ_HUMAN	Diacylglycerol kinase theta (DAG kinase theta) (DGKtheta) (EC 2.7.1.107) (EC 2.7.1.93) (Diglyceride kinase theta) (DGK-theta)	DGKQ DAGK4	Homo sapiens (Human)	942
P53350	reviewed	PLK1_HUMAN	Serine/threonine-protein kinase PLK1 (EC 2.7.11.21) (Polo-like kinase 1) (PLK-1) (Serine/threonine-protein kinase 13) (STPK13)	PLK1 PLK	Homo sapiens (Human)	603
P53355	reviewed	DAPK1_HUMAN	Death-associated protein kinase 1 (DAP kinase 1) (EC 2.7.11.1)	DAPK1 DAPK	Homo sapiens (Human)	1430
P53667	reviewed	LIMK1_HUMAN	LIM domain kinase 1 (LIMK-1) (EC 2.7.11.1)	LIMK1 LIMK	Homo sapiens (Human)	647
P53671	reviewed	LIMK2_HUMAN	LIM domain kinase 2 (LIMK-2) (EC 2.7.11.1)	LIMK2	Homo sapiens (Human)	638
P53778	reviewed	MK12_HUMAN	Mitogen-activated protein kinase 12 (MAP kinase 12) (MAPK 12) (EC 2.7.11.24) (Extracellular signal-regulated kinase 6) (ERK-6) (Mitogen-activated protein kinase p38 gamma) (MAP kinase p38 gamma) (Stress-activated protein kinase 3)	MAPK12 ERK6 SAPK3	Homo sapiens (Human)	367
P53779	reviewed	MK10_HUMAN	Mitogen-activated protein kinase 10 (MAP kinase 10) (MAPK 10) (EC 2.7.11.24) (MAP kinase p49 3F12) (Stress-activated protein kinase 1b) (SAPK1b) (Stress-activated protein kinase JNK3) (c-Jun N-terminal kinase 3)	MAPK10 JNK3 JNK3A PRKM10 SAPK1B	Homo sapiens (Human)	464
P54646	reviewed	AAPK2_HUMAN	5'-AMP-activated protein kinase catalytic subunit alpha-2 (AMPK subunit alpha-2) (EC 2.7.11.1) (Acetyl-CoA carboxylase kinase) (ACACA kinase) (Hydroxymethylglutaryl-CoA reductase kinase) (HMGCR kinase) (EC 2.7.11.31)	PRKAA2 AMPK AMPK2	Homo sapiens (Human)	552
P54753	reviewed	EPHB3_HUMAN	Ephrin type-B receptor 3 (EC 2.7.10.1) (EPH-like tyrosine kinase 2) (EPH-like kinase 2) (Embryonic kinase 2) (EK2) (hEK2) (Tyrosine-protein kinase TYRO6)	EPHB3 ETK2 HEK2 TYRO6	Homo sapiens (Human)	998
P54756	reviewed	EPHA5_HUMAN	Ephrin type-A receptor 5 (EC 2.7.10.1) (Brain-specific kinase) (EPH homology kinase 1) (EHK-1) (EPH-like kinase 7) (EK7) (hEK7)	EPHA5 BSK EHK1 HEK7 TYRO4	Homo sapiens (Human)	1037
P54760	reviewed	EPHB4_HUMAN	Ephrin type-B receptor 4 (EC 2.7.10.1) (Hepatoma transmembrane kinase) (Tyrosine-protein kinase TYRO11)	EPHB4 HTK MYK1 TYRO11	Homo sapiens (Human)	987
P54762	reviewed	EPHB1_HUMAN	Ephrin type-B receptor 1 (EC 2.7.10.1) (ELK) (EPH tyrosine kinase 2) (EPH-like kinase 6) (EK6) (hEK6) (Neuronally-expressed EPH-related tyrosine kinase) (NET) (Tyrosine-protein kinase receptor EPH-2)	EPHB1 ELK EPHT2 HEK6 NET	Homo sapiens (Human)	984
P54764	reviewed	EPHA4_HUMAN	Ephrin type-A receptor 4 (EC 2.7.10.1) (EPH-like kinase 8) (EK8) (hEK8) (Tyrosine-protein kinase TYRO1) (Tyrosine-protein kinase receptor SEK)	EPHA4 HEK8 SEK TYRO1	Homo sapiens (Human)	986
P54819	reviewed	KAD2_HUMAN	Adenylate kinase 2, mitochondrial (AK 2) (EC 2.7.4.3) (ATP-AMP transphosphorylase 2) (ATP:AMP phosphotransferase) (Adenylate monophosphate kinase) [Cleaved into: Adenylate kinase 2, mitochondrial, N-terminally processed]	AK2 ADK2	Homo sapiens (Human)	239
P54886	reviewed	P5CS_HUMAN	Delta-1-pyrroline-5-carboxylate synthase (P5CS) (Aldehyde dehydrogenase family 18 member A1) [Includes: Glutamate 5-kinase (GK) (EC 2.7.2.11) (Gamma-glutamyl kinase); Gamma-glutamyl phosphate reductase (GPR) (EC 1.2.1.41) (Glutamate-5-semialdehyde dehydrogenase) (Glutamyl-gamma-semialdehyde dehydrogenase)]	ALDH18A1 GSAS P5CS PYCS	Homo sapiens (Human)	795
P55263	reviewed	ADK_HUMAN	Adenosine kinase (AK) (EC 2.7.1.20) (Adenosine 5'-phosphotransferase)	ADK	Homo sapiens (Human)	362
P57058	reviewed	HUNK_HUMAN	Hormonally up-regulated neu tumor-associated kinase (EC 2.7.11.1) (B19) (Serine/threonine-protein kinase MAK-V)	HUNK MAKV	Homo sapiens (Human)	714
P57059	reviewed	SIK1_HUMAN	Serine/threonine-protein kinase SIK1 (EC 2.7.11.1) (Salt-inducible kinase 1) (SIK-1) (Serine/threonine-protein kinase SNF1-like kinase 1) (Serine/threonine-protein kinase SNF1LK)	SIK1 SIK SNF1LK	Homo sapiens (Human)	783
P57078	reviewed	RIPK4_HUMAN	Receptor-interacting serine/threonine-protein kinase 4 (EC 2.7.11.1) (Ankyrin repeat domain-containing protein 3) (PKC-delta-interacting protein kinase)	RIPK4 ANKRD3 DIK	Homo sapiens (Human)	832
P60891	reviewed	PRPS1_HUMAN	Ribose-phosphate pyrophosphokinase 1 (EC 2.7.6.1) (PPRibP) (Phosphoribosyl pyrophosphate synthase I) (PRS-I)	PRPS1	Homo sapiens (Human)	318
P68400	reviewed	CSK21_HUMAN	Casein kinase II subunit alpha (CK II alpha) (EC 2.7.11.1)	CSNK2A1 CK2A1	Homo sapiens (Human)	391
P78356	reviewed	PI42B_HUMAN	Phosphatidylinositol 5-phosphate 4-kinase type-2 beta (EC 2.7.1.149) (1-phosphatidylinositol 5-phosphate 4-kinase 2-beta) (Diphosphoinositide kinase 2-beta) (Phosphatidylinositol 5-phosphate 4-kinase type II beta) (PI(5)P 4-kinase type II beta) (PIP4KII-beta) (PtdIns(5)P-4-kinase isoform 2-beta)	PIP4K2B PIP5K2B	Homo sapiens (Human)	416
P78362	reviewed	SRPK2_HUMAN	SRSF protein kinase 2 (EC 2.7.11.1) (SFRS protein kinase 2) (Serine/arginine-rich protein-specific kinase 2) (SR-protein-specific kinase 2) [Cleaved into: SRSF protein kinase 2 N-terminal; SRSF protein kinase 2 C-terminal]	SRPK2	Homo sapiens (Human)	688
P78368	reviewed	KC1G2_HUMAN	Casein kinase I isoform gamma-2 (CKI-gamma 2) (EC 2.7.11.1)	CSNK1G2 CK1G2	Homo sapiens (Human)	415
P78527	reviewed	PRKDC_HUMAN	DNA-dependent protein kinase catalytic subunit (DNA-PK catalytic subunit) (DNA-PKcs) (EC 2.7.11.1) (DNPK1) (Ser-473 kinase) (S473K) (p460)	PRKDC HYRC HYRC1	Homo sapiens (Human)	4128
P80192	reviewed	M3K9_HUMAN	Mitogen-activated protein kinase kinase kinase 9 (EC 2.7.11.25) (Mixed lineage kinase 1)	MAP3K9 MLK1 PRKE1	Homo sapiens (Human)	1104
Q00526	reviewed	CDK3_HUMAN	Cyclin-dependent kinase 3 (EC 2.7.11.22) (Cell division protein kinase 3)	CDK3 CDKN3	Homo sapiens (Human)	305
Q00532	reviewed	CDKL1_HUMAN	Cyclin-dependent kinase-like 1 (EC 2.7.11.22) (Protein kinase p42 KKIALRE) (Serine/threonine-protein kinase KKIALRE)	CDKL1	Homo sapiens (Human)	357
Q00534	reviewed	CDK6_HUMAN	Cyclin-dependent kinase 6 (EC 2.7.11.22) (Cell division protein kinase 6) (Serine/threonine-protein kinase PLSTIRE)	CDK6 CDKN6	Homo sapiens (Human)	326
Q00535	reviewed	CDK5_HUMAN	Cyclin-dependent kinase 5 (EC 2.7.11.1) (Cell division protein kinase 5) (Cyclin-dependent-like kinase 5) (Serine/threonine-protein kinase PSSALRE) (Tau protein kinase II catalytic subunit) (TPKII catalytic subunit)	CDK5 CDKN5 PSSALRE	Homo sapiens (Human)	292
Q00536	reviewed	CDK16_HUMAN	Cyclin-dependent kinase 16 (EC 2.7.11.22) (Cell division protein kinase 16) (PCTAIRE-motif protein kinase 1) (Serine/threonine-protein kinase PCTAIRE-1)	CDK16 PCTAIRE1 PCTK1	Homo sapiens (Human)	496
Q00537	reviewed	CDK17_HUMAN	Cyclin-dependent kinase 17 (EC 2.7.11.22) (Cell division protein kinase 17) (PCTAIRE-motif protein kinase 2) (Serine/threonine-protein kinase PCTAIRE-2)	CDK17 PCTAIRE2 PCTK2	Homo sapiens (Human)	523
Q01415	reviewed	GALK2_HUMAN	N-acetylgalactosamine kinase (EC 2.7.1.157) (GalNAc kinase) (Galactokinase 2)	GALK2 GK2	Homo sapiens (Human)	458
Q01813	reviewed	PFKAP_HUMAN	ATP-dependent 6-phosphofructokinase, platelet type (ATP-PFK) (PFK-P) (EC 2.7.1.11) (6-phosphofructokinase type C) (Phosphofructo-1-kinase isozyme C) (PFK-C) (Phosphohexokinase)	PFKP PFKF	Homo sapiens (Human)	784
Q01973	reviewed	ROR1_HUMAN	Inactive tyrosine-protein kinase transmembrane receptor ROR1 (Neurotrophic tyrosine kinase, receptor-related 1)	ROR1 NTRKR1	Homo sapiens (Human)	937
Q01974	reviewed	ROR2_HUMAN	Tyrosine-protein kinase transmembrane receptor ROR2 (EC 2.7.10.1) (Neurotrophic tyrosine kinase, receptor-related 2)	ROR2 NTRKR2	Homo sapiens (Human)	943
Q02156	reviewed	KPCE_HUMAN	Protein kinase C epsilon type (EC 2.7.11.13) (nPKC-epsilon)	PRKCE PKCE	Homo sapiens (Human)	737
Q02750	reviewed	MP2K1_HUMAN	Dual specificity mitogen-activated protein kinase kinase 1 (MAP kinase kinase 1) (MAPKK 1) (MKK1) (EC 2.7.12.2) (ERK activator kinase 1) (MAPK/ERK kinase 1) (MEK 1)	MAP2K1 MEK1 PRKMK1	Homo sapiens (Human)	393
Q02763	reviewed	TIE2_HUMAN	Angiopoietin-1 receptor (EC 2.7.10.1) (Endothelial tyrosine kinase) (Tunica interna endothelial cell kinase) (Tyrosine kinase with Ig and EGF homology domains-2) (Tyrosine-protein kinase receptor TEK) (Tyrosine-protein kinase receptor TIE-2) (hTIE2) (p140 TEK) (CD antigen CD202b)	TEK TIE2 VMCM VMCM1	Homo sapiens (Human)	1124
Q02779	reviewed	M3K10_HUMAN	Mitogen-activated protein kinase kinase kinase 10 (EC 2.7.11.25) (Mixed lineage kinase 2) (Protein kinase MST)	MAP3K10 MLK2 MST	Homo sapiens (Human)	954
Q03426	reviewed	KIME_HUMAN	Mevalonate kinase (MK) (EC 2.7.1.36)	MVK	Homo sapiens (Human)	396
Q04759	reviewed	KPCT_HUMAN	Protein kinase C theta type (EC 2.7.11.13) (nPKC-theta)	PRKCQ PRKCT	Homo sapiens (Human)	706
Q04771	reviewed	ACVR1_HUMAN	Activin receptor type-1 (EC 2.7.11.30) (Activin receptor type I) (ACTR-I) (Activin receptor-like kinase 2) (ALK-2) (Serine/threonine-protein kinase receptor R1) (SKR1) (TGF-B superfamily receptor type I) (TSR-I)	ACVR1 ACVRLK2	Homo sapiens (Human)	509
Q04912	reviewed	RON_HUMAN	Macrophage-stimulating protein receptor (MSP receptor) (EC 2.7.10.1) (CDw136) (Protein-tyrosine kinase 8) (p185-Ron) (CD antigen CD136) [Cleaved into: Macrophage-stimulating protein receptor alpha chain; Macrophage-stimulating protein receptor beta chain]	MST1R PTK8 RON	Homo sapiens (Human)	1400
Q05397	reviewed	FAK1_HUMAN	Focal adhesion kinase 1 (FADK 1) (EC 2.7.10.2) (Focal adhesion kinase-related nonkinase) (FRNK) (Protein phosphatase 1 regulatory subunit 71) (PPP1R71) (Protein-tyrosine kinase 2) (p125FAK) (pp125FAK)	PTK2 FAK FAK1	Homo sapiens (Human)	1052
Q05513	reviewed	KPCZ_HUMAN	Protein kinase C zeta type (EC 2.7.11.13) (nPKC-zeta)	PRKCZ PKC2	Homo sapiens (Human)	592
Q05655	reviewed	KPCD_HUMAN	Protein kinase C delta type (EC 2.7.11.13) (Tyrosine-protein kinase PRKCD) (EC 2.7.10.2) (nPKC-delta) [Cleaved into: Protein kinase C delta type regulatory subunit; Protein kinase C delta type catalytic subunit (Sphingosine-dependent protein kinase-1) (SDK1)]	PRKCD PKCD	Homo sapiens (Human)	676
Q06187	reviewed	BTK_HUMAN	Tyrosine-protein kinase BTK (EC 2.7.10.2) (Agammaglobulinemia tyrosine kinase) (ATK) (B-cell progenitor kinase) (BPK) (Bruton tyrosine kinase)	BTK AGMX1 ATK BPK	Homo sapiens (Human)	659
Q06418	reviewed	TYRO3_HUMAN	Tyrosine-protein kinase receptor TYRO3 (EC 2.7.10.1) (Tyrosine-protein kinase BYK) (Tyrosine-protein kinase DTK) (Tyrosine-protein kinase RSE) (Tyrosine-protein kinase SKY) (Tyrosine-protein kinase TIF)	TYRO3 BYK DTK RSE SKY TIF	Homo sapiens (Human)	890
Q07002	reviewed	CDK18_HUMAN	Cyclin-dependent kinase 18 (EC 2.7.11.22) (Cell division protein kinase 18) (PCTAIRE-motif protein kinase 3) (Serine/threonine-protein kinase PCTAIRE-3)	CDK18 PCTAIRE3 PCTK3	Homo sapiens (Human)	474
Q07912	reviewed	ACK1_HUMAN	Activated CDC42 kinase 1 (ACK-1) (EC 2.7.10.2) (EC 2.7.11.1) (Tyrosine kinase non-receptor protein 2)	TNK2 ACK1	Homo sapiens (Human)	1038
Q08345	reviewed	DDR1_HUMAN	Epithelial discoidin domain-containing receptor 1 (Epithelial discoidin domain receptor 1) (EC 2.7.10.1) (CD167 antigen-like family member A) (Cell adhesion kinase) (Discoidin receptor tyrosine kinase) (HGK2) (Mammary carcinoma kinase 10) (MCK-10) (Protein-tyrosine kinase 3A) (Protein-tyrosine kinase RTK-6) (TRK E) (Tyrosine kinase DDR) (Tyrosine-protein kinase CAK) (CD antigen CD167a)	DDR1 CAK EDDR1 NEP NTRK4 PTK3A RTK6 TRKE	Homo sapiens (Human)	913
Q08881	reviewed	ITK_HUMAN	Tyrosine-protein kinase ITK/TSK (EC 2.7.10.2) (Interleukin-2-inducible T-cell kinase) (IL-2-inducible T-cell kinase) (Kinase EMT) (T-cell-specific kinase) (Tyrosine-protein kinase Lyk)	ITK EMT LYK	Homo sapiens (Human)	620
Q09013	reviewed	DMPK_HUMAN	Myotonin-protein kinase (MT-PK) (EC 2.7.11.1) (DM-kinase) (DMK) (DM1 protein kinase) (DMPK) (Myotonic dystrophy protein kinase)	DMPK DM1PK MDPK	Homo sapiens (Human)	629
Q12851	reviewed	M4K2_HUMAN	Mitogen-activated protein kinase kinase kinase kinase 2 (EC 2.7.11.1) (B lymphocyte serine/threonine-protein kinase) (Germinal center kinase) (GC kinase) (MAPK/ERK kinase kinase kinase 2) (MEK kinase kinase 2) (MEKKK 2) (Rab8-interacting protein)	MAP4K2 GCK RAB8IP	Homo sapiens (Human)	820
Q12852	reviewed	M3K12_HUMAN	Mitogen-activated protein kinase kinase kinase 12 (EC 2.7.11.25) (Dual leucine zipper bearing kinase) (DLK) (Leucine-zipper protein kinase) (ZPK) (MAPK-upstream kinase) (MUK) (Mixed lineage kinase)	MAP3K12 ZPK	Homo sapiens (Human)	859
Q12866	reviewed	MERTK_HUMAN	Tyrosine-protein kinase Mer (EC 2.7.10.1) (Proto-oncogene c-Mer) (Receptor tyrosine kinase MerTK)	MERTK MER	Homo sapiens (Human)	999
Q13043	reviewed	STK4_HUMAN	Serine/threonine-protein kinase 4 (EC 2.7.11.1) (Mammalian STE20-like protein kinase 1) (MST-1) (STE20-like kinase MST1) (Serine/threonine-protein kinase Krs-2) [Cleaved into: Serine/threonine-protein kinase 4 37kDa subunit (MST1/N); Serine/threonine-protein kinase 4 18kDa subunit (MST1/C)]	STK4 KRS2 MST1	Homo sapiens (Human)	487
Q13057	reviewed	COASY_HUMAN	Bifunctional coenzyme A synthase (CoA synthase) (NBP) (POV-2) [Includes: Phosphopantetheine adenylyltransferase (EC 2.7.7.3) (Dephospho-CoA pyrophosphorylase) (Pantetheine-phosphate adenylyltransferase) (PPAT); Dephospho-CoA kinase (DPCK) (EC 2.7.1.24) (Dephosphocoenzyme A kinase) (DPCOAK)]	COASY PSEC0106	Homo sapiens (Human)	564
Q13131	reviewed	AAPK1_HUMAN	5'-AMP-activated protein kinase catalytic subunit alpha-1 (AMPK subunit alpha-1) (EC 2.7.11.1) (Acetyl-CoA carboxylase kinase) (ACACA kinase) (Hydroxymethylglutaryl-CoA reductase kinase) (HMGCR kinase) (EC 2.7.11.31) (Tau-protein kinase PRKAA1) (EC 2.7.11.26)	PRKAA1 AMPK1	Homo sapiens (Human)	559
Q13153	reviewed	PAK1_HUMAN	Serine/threonine-protein kinase PAK 1 (EC 2.7.11.1) (Alpha-PAK) (p21-activated kinase 1) (PAK-1) (p65-PAK)	PAK1	Homo sapiens (Human)	545
Q13163	reviewed	MP2K5_HUMAN	Dual specificity mitogen-activated protein kinase kinase 5 (MAP kinase kinase 5) (MAPKK 5) (EC 2.7.12.2) (MAPK/ERK kinase 5) (MEK 5)	MAP2K5 MEK5 MKK5 PRKMK5	Homo sapiens (Human)	448
Q13164	reviewed	MK07_HUMAN	Mitogen-activated protein kinase 7 (MAP kinase 7) (MAPK 7) (EC 2.7.11.24) (Big MAP kinase 1) (BMK-1) (Extracellular signal-regulated kinase 5) (ERK-5)	MAPK7 BMK1 ERK5 PRKM7	Homo sapiens (Human)	816
Q13177	reviewed	PAK2_HUMAN	Serine/threonine-protein kinase PAK 2 (EC 2.7.11.1) (Gamma-PAK) (PAK65) (S6/H4 kinase) (p21-activated kinase 2) (PAK-2) (p58) [Cleaved into: PAK-2p27 (p27); PAK-2p34 (p34) (C-t-PAK2)]	PAK2	Homo sapiens (Human)	524
Q13188	reviewed	STK3_HUMAN	Serine/threonine-protein kinase 3 (EC 2.7.11.1) (Mammalian STE20-like protein kinase 2) (MST-2) (STE20-like kinase MST2) (Serine/threonine-protein kinase Krs-1) [Cleaved into: Serine/threonine-protein kinase 3 36kDa subunit (MST2/N); Serine/threonine-protein kinase 3 20kDa subunit (MST2/C)]	STK3 KRS1 MST2	Homo sapiens (Human)	491
Q13232	reviewed	NDK3_HUMAN	Nucleoside diphosphate kinase 3 (NDK 3) (NDP kinase 3) (EC 2.7.4.6) (DR-nm23) (Nucleoside diphosphate kinase C) (NDPKC) (nm23-H3)	NME3	Homo sapiens (Human)	169
Q13233	reviewed	M3K1_HUMAN	Mitogen-activated protein kinase kinase kinase 1 (EC 2.7.11.25) (MAPK/ERK kinase kinase 1) (MEK kinase 1) (MEKK 1) (EC 2.3.2.27)	MAP3K1 MAPKKK1 MEKK MEKK1	Homo sapiens (Human)	1512
Q13237	reviewed	KGP2_HUMAN	cGMP-dependent protein kinase 2 (cGK 2) (cGK2) (EC 2.7.11.12) (cGMP-dependent protein kinase II) (cGKII)	PRKG2 PRKGR2	Homo sapiens (Human)	762
Q13315	reviewed	ATM_HUMAN	Serine-protein kinase ATM (EC 2.7.11.1) (Ataxia telangiectasia mutated) (A-T mutated)	ATM	Homo sapiens (Human)	3056
Q13464	reviewed	ROCK1_HUMAN	Rho-associated protein kinase 1 (EC 2.7.11.1) (Renal carcinoma antigen NY-REN-35) (Rho-associated, coiled-coil-containing protein kinase 1) (Rho-associated, coiled-coil-containing protein kinase I) (ROCK-I) (p160 ROCK-1) (p160ROCK)	ROCK1	Homo sapiens (Human)	1354
Q13470	reviewed	TNK1_HUMAN	Non-receptor tyrosine-protein kinase TNK1 (EC 2.7.10.2) (CD38 negative kinase 1)	TNK1	Homo sapiens (Human)	666
Q13523	reviewed	PRP4K_HUMAN	Serine/threonine-protein kinase PRP4 homolog (EC 2.7.11.1) (PRP4 kinase) (PRP4 pre-mRNA-processing factor 4 homolog)	PRP4K KIAA0536 PRP4 PRP4B PRP4H PRPF4K	Homo sapiens (Human)	1007
Q13535	reviewed	ATR_HUMAN	Serine/threonine-protein kinase ATR (EC 2.7.11.1) (Ataxia telangiectasia and Rad3-related protein) (FRAP-related protein 1)	ATR FRP1	Homo sapiens (Human)	2644
Q13546	reviewed	RIPK1_HUMAN	Receptor-interacting serine/threonine-protein kinase 1 (EC 2.7.11.1) (Cell death protein RIP) (Receptor-interacting protein 1) (RIP-1)	RIPK1 RIP RIP1	Homo sapiens (Human)	671
Q13554	reviewed	KCC2B_HUMAN	Calcium/calmodulin-dependent protein kinase type II subunit beta (CaM kinase II subunit beta) (CaMK-II subunit beta) (EC 2.7.11.17)	CAMK2B CAM2 CAMK2 CAMKB	Homo sapiens (Human)	666
Q13555	reviewed	KCC2G_HUMAN	Calcium/calmodulin-dependent protein kinase type II subunit gamma (CaM kinase II subunit gamma) (CaMK-II subunit gamma) (EC 2.7.11.17)	CAMK2G CAMK CAMK-II CAMKG	Homo sapiens (Human)	558
Q13557	reviewed	KCC2D_HUMAN	Calcium/calmodulin-dependent protein kinase type II subunit delta (CaM kinase II subunit delta) (CaMK-II subunit delta) (EC 2.7.11.17)	CAMK2D CAMKD	Homo sapiens (Human)	499
Q13572	reviewed	ITPK1_HUMAN	Inositol-tetrakisphosphate 1-kinase (EC 2.7.1.134) (Inositol 1,3,4-trisphosphate 5/6-kinase) (Inositol-triphosphate 5/6-kinase) (Ins(1,3,4)P(3) 5/6-kinase) (EC 2.7.1.159)	ITPK1	Homo sapiens (Human)	414
Q13574	reviewed	DGKZ_HUMAN	Diacylglycerol kinase zeta (DAG kinase zeta) (EC 2.7.1.107) (EC 2.7.1.93) (Diglyceride kinase zeta) (DGK-zeta)	DGKZ DAGK6	Homo sapiens (Human)	928
Q13627	reviewed	DYR1A_HUMAN	Dual specificity tyrosine-phosphorylation-regulated kinase 1A (EC 2.7.11.23) (EC 2.7.12.1) (Dual specificity YAK1-related kinase) (HP86) (Protein kinase minibrain homolog) (MNBH) (hMNB)	DYRK1A DYRK MNB MNBH	Homo sapiens (Human)	763
Q13705	reviewed	AVR2B_HUMAN	Activin receptor type-2B (EC 2.7.11.30) (Activin receptor type IIB) (ACTR-IIB)	ACVR2B	Homo sapiens (Human)	512
Q13873	reviewed	BMPR2_HUMAN	Bone morphogenetic protein receptor type-2 (BMP type-2 receptor) (BMPR-2) (EC 2.7.11.30) (Bone morphogenetic protein receptor type II) (BMP type II receptor) (BMPR-II)	BMPR2 PPH1	Homo sapiens (Human)	1038
Q13882	reviewed	PTK6_HUMAN	Protein-tyrosine kinase 6 (EC 2.7.10.2) (Breast tumor kinase) (Tyrosine-protein kinase BRK)	PTK6 BRK	Homo sapiens (Human)	451
Q13976	reviewed	KGP1_HUMAN	cGMP-dependent protein kinase 1 (cGK 1) (cGK1) (EC 2.7.11.12) (cGMP-dependent protein kinase I) (cGKI)	PRKG1 PRKG1B PRKGR1A PRKGR1B	Homo sapiens (Human)	671
Q14004	reviewed	CDK13_HUMAN	Cyclin-dependent kinase 13 (EC 2.7.11.22) (EC 2.7.11.23) (CDC2-related protein kinase 5) (Cell division cycle 2-like protein kinase 5) (Cell division protein kinase 13) (hCDK13) (Cholinesterase-related cell division controller)	CDK13 CDC2L CDC2L5 CHED KIAA1791	Homo sapiens (Human)	1512
Q14012	reviewed	KCC1A_HUMAN	Calcium/calmodulin-dependent protein kinase type 1 (EC 2.7.11.17) (CaM kinase I) (CaM-KI) (CaM kinase I alpha) (CaMKI-alpha)	CAMK1	Homo sapiens (Human)	370
Q14164	reviewed	IKKE_HUMAN	Inhibitor of nuclear factor kappa-B kinase subunit epsilon (I-kappa-B kinase epsilon) (IKK-E) (IKK-epsilon) (IkBKE) (EC 2.7.11.10) (Inducible I kappa-B kinase) (IKK-i)	IKBKE IKKE IKKI KIAA0151	Homo sapiens (Human)	716
Q14289	reviewed	FAK2_HUMAN	Protein-tyrosine kinase 2-beta (EC 2.7.10.2) (Calcium-dependent tyrosine kinase) (CADTK) (Calcium-regulated non-receptor proline-rich tyrosine kinase) (Cell adhesion kinase beta) (CAK-beta) (CAKB) (Focal adhesion kinase 2) (FADK 2) (Proline-rich tyrosine kinase 2) (Related adhesion focal tyrosine kinase) (RAFTK)	PTK2B FAK2 PYK2 RAFTK	Homo sapiens (Human)	1009
Q14296	reviewed	FASTK_HUMAN	Fas-activated serine/threonine kinase (FAST kinase) (EC 2.7.11.1) (EC 2.7.11.8)	FASTK	Homo sapiens (Human)	549
Q14410	reviewed	GLPK2_HUMAN	Glycerol kinase 2 (GK 2) (Glycerokinase 2) (EC 2.7.1.30) (ATP:glycerol 3-phosphotransferase 2) (Glycerol kinase, testis specific 2)	GK2 GKP2 GKTA	Homo sapiens (Human)	553
Q14680	reviewed	MELK_HUMAN	Maternal embryonic leucine zipper kinase (hMELK) (EC 2.7.11.1) (Protein kinase Eg3) (pEg3 kinase) (Protein kinase PK38) (hPK38) (Tyrosine-protein kinase MELK) (EC 2.7.10.2)	MELK KIAA0175	Homo sapiens (Human)	651
Q15118	reviewed	PDK1_HUMAN	[Pyruvate dehydrogenase (acetyl-transferring)] kinase isozyme 1, mitochondrial (EC 2.7.11.2) (Pyruvate dehydrogenase kinase isoform 1) (PDH kinase 1)	PDK1 PDHK1	Homo sapiens (Human)	436
Q15119	reviewed	PDK2_HUMAN	[Pyruvate dehydrogenase (acetyl-transferring)] kinase isozyme 2, mitochondrial (EC 2.7.11.2) (Pyruvate dehydrogenase kinase isoform 2) (PDH kinase 2) (PDKII)	PDK2 PDHK2	Homo sapiens (Human)	407
Q15120	reviewed	PDK3_HUMAN	[Pyruvate dehydrogenase (acetyl-transferring)] kinase isozyme 3, mitochondrial (EC 2.7.11.2) (Pyruvate dehydrogenase kinase isoform 3)	PDK3 PDHK3	Homo sapiens (Human)	406
Q15126	reviewed	PMVK_HUMAN	Phosphomevalonate kinase (PMKase) (hPMK) (EC 2.7.4.2)	PMVK PMKI	Homo sapiens (Human)	192
Q15131	reviewed	CDK10_HUMAN	Cyclin-dependent kinase 10 (EC 2.7.11.22) (Cell division protein kinase 10) (Serine/threonine-protein kinase PISSLRE)	CDK10	Homo sapiens (Human)	360
Q15139	reviewed	KPCD1_HUMAN	Serine/threonine-protein kinase D1 (EC 2.7.11.13) (Protein kinase C mu type) (Protein kinase D) (nPKC-D1) (nPKC-mu)	PRKD1 PKD PKD1 PRKCM	Homo sapiens (Human)	912
Q15208	reviewed	STK38_HUMAN	Serine/threonine-protein kinase 38 (EC 2.7.11.1) (NDR1 protein kinase) (Nuclear Dbf2-related kinase 1)	STK38 NDR1	Homo sapiens (Human)	465
Q15303	reviewed	ERBB4_HUMAN	Receptor tyrosine-protein kinase erbB-4 (EC 2.7.10.1) (Proto-oncogene-like protein c-ErbB-4) (Tyrosine kinase-type cell surface receptor HER4) (p180erbB4) [Cleaved into: ERBB4 intracellular domain (4ICD) (E4ICD) (s80HER4)]	ERBB4 HER4	Homo sapiens (Human)	1308
Q15349	reviewed	KS6A2_HUMAN	Ribosomal protein S6 kinase alpha-2 (S6K-alpha-2) (EC 2.7.11.1) (90 kDa ribosomal protein S6 kinase 2) (p90-RSK 2) (p90RSK2) (MAP kinase-activated protein kinase 1c) (MAPK-activated protein kinase 1c) (MAPKAP kinase 1c) (MAPKAPK-1c) (Ribosomal S6 kinase 3) (RSK-3) (pp90RSK3)	RPS6KA2 MAPKAPK1C RSK3	Homo sapiens (Human)	733
Q15375	reviewed	EPHA7_HUMAN	Ephrin type-A receptor 7 (EC 2.7.10.1) (EPH homology kinase 3) (EHK-3) (EPH-like kinase 11) (EK11) (hEK11)	EPHA7 EHK3 HEK11	Homo sapiens (Human)	998
Q15418	reviewed	KS6A1_HUMAN	Ribosomal protein S6 kinase alpha-1 (S6K-alpha-1) (EC 2.7.11.1) (90 kDa ribosomal protein S6 kinase 1) (p90-RSK 1) (p90RSK1) (p90S6K) (MAP kinase-activated protein kinase 1a) (MAPK-activated protein kinase 1a) (MAPKAP kinase 1a) (MAPKAPK-1a) (Ribosomal S6 kinase 1) (RSK-1)	RPS6KA1 MAPKAPK1A RSK1	Homo sapiens (Human)	735
Q15569	reviewed	TESK1_HUMAN	Dual specificity testis-specific protein kinase 1 (EC 2.7.12.1) (Testicular protein kinase 1)	TESK1	Homo sapiens (Human)	626
Q15746	reviewed	MYLK_HUMAN	Myosin light chain kinase, smooth muscle (MLCK) (smMLCK) (EC 2.7.11.18) (Kinase-related protein) (KRP) (Telokin) [Cleaved into: Myosin light chain kinase, smooth muscle, deglutamylated form]	MYLK MLCK MLCK1 MYLK1	Homo sapiens (Human)	1914
Q15759	reviewed	MK11_HUMAN	Mitogen-activated protein kinase 11 (MAP kinase 11) (MAPK 11) (EC 2.7.11.24) (Mitogen-activated protein kinase p38 beta) (MAP kinase p38 beta) (p38b) (Stress-activated protein kinase 2b) (SAPK2b) (p38-2)	MAPK11 PRKM11 SAPK2 SAPK2B	Homo sapiens (Human)	364
Q15772	reviewed	SPEG_HUMAN	Striated muscle preferentially expressed protein kinase (EC 2.7.11.1) (Aortic preferentially expressed protein 1) (APEG-1)	SPEG APEG1 KIAA1297	Homo sapiens (Human)	3267
Q15831	reviewed	STK11_HUMAN	Serine/threonine-protein kinase STK11 (EC 2.7.11.1) (Liver kinase B1) (LKB1) (hLKB1) (Renal carcinoma antigen NY-REN-19)	STK11 LKB1 PJS	Homo sapiens (Human)	433
Q15835	reviewed	GRK1_HUMAN	Rhodopsin kinase GRK1 (RK) (EC 2.7.11.14) (G protein-coupled receptor kinase 1)	GRK1 RHOK	Homo sapiens (Human)	563
Q16288	reviewed	NTRK3_HUMAN	NT-3 growth factor receptor (EC 2.7.10.1) (GP145-TrkC) (Trk-C) (Neurotrophic tyrosine kinase receptor type 3) (TrkC tyrosine kinase)	NTRK3 TRKC	Homo sapiens (Human)	839
Q16512	reviewed	PKN1_HUMAN	Serine/threonine-protein kinase N1 (EC 2.7.11.13) (Protease-activated kinase 1) (PAK-1) (Protein kinase C-like 1) (Protein kinase C-like PKN) (Protein kinase PKN-alpha) (Protein-kinase C-related kinase 1) (Serine-threonine protein kinase N)	PKN1 PAK1 PKN PRK1 PRKCL1	Homo sapiens (Human)	942
Q16513	reviewed	PKN2_HUMAN	Serine/threonine-protein kinase N2 (EC 2.7.11.13) (PKN gamma) (Protein kinase C-like 2) (Protein-kinase C-related kinase 2)	PKN2 PRK2 PRKCL2	Homo sapiens (Human)	984
Q16539	reviewed	MK14_HUMAN	Mitogen-activated protein kinase 14 (MAP kinase 14) (MAPK 14) (EC 2.7.11.24) (Cytokine suppressive anti-inflammatory drug-binding protein) (CSAID-binding protein) (CSBP) (MAP kinase MXI2) (MAX-interacting protein 2) (Mitogen-activated protein kinase p38 alpha) (MAP kinase p38 alpha) (Stress-activated protein kinase 2a) (SAPK2a)	MAPK14 CSBP CSBP1 CSBP2 CSPB1 MXI2 SAPK2A	Homo sapiens (Human)	360
Q16566	reviewed	KCC4_HUMAN	Calcium/calmodulin-dependent protein kinase type IV (CaMK IV) (EC 2.7.11.17) (CaM kinase-GR)	CAMK4 CAMK CAMK-GR CAMKIV	Homo sapiens (Human)	473
Q16584	reviewed	M3K11_HUMAN	Mitogen-activated protein kinase kinase kinase 11 (EC 2.7.11.25) (Mixed lineage kinase 3) (Src-homology 3 domain-containing proline-rich kinase)	MAP3K11 MLK3 PTK1 SPRK	Homo sapiens (Human)	847
Q16620	reviewed	NTRK2_HUMAN	BDNF/NT-3 growth factors receptor (EC 2.7.10.1) (GP145-TrkB) (Trk-B) (Neurotrophic tyrosine kinase receptor type 2) (TrkB tyrosine kinase) (Tropomyosin-related kinase B)	NTRK2 TRKB	Homo sapiens (Human)	822
Q16644	reviewed	MAPK3_HUMAN	MAP kinase-activated protein kinase 3 (MAPK-activated protein kinase 3) (MAPKAP kinase 3) (MAPKAP-K3) (MAPKAPK-3) (MK-3) (EC 2.7.11.1) (Chromosome 3p kinase) (3pK)	MAPKAPK3	Homo sapiens (Human)	382
Q16654	reviewed	PDK4_HUMAN	[Pyruvate dehydrogenase (acetyl-transferring)] kinase isozyme 4, mitochondrial (EC 2.7.11.2) (Pyruvate dehydrogenase kinase isoform 4)	PDK4 PDHK4	Homo sapiens (Human)	411
Q16659	reviewed	MK06_HUMAN	Mitogen-activated protein kinase 6 (MAP kinase 6) (MAPK 6) (EC 2.7.11.24) (Extracellular signal-regulated kinase 3) (ERK-3) (MAP kinase isoform p97) (p97-MAPK)	MAPK6 ERK3 PRKM6	Homo sapiens (Human)	721
Q16671	reviewed	AMHR2_HUMAN	Anti-Muellerian hormone type-2 receptor (EC 2.7.11.30) (Anti-Muellerian hormone type II receptor) (AMH type II receptor) (MIS type II receptor) (MISRII) (MRII)	AMHR2 AMHR MISR2	Homo sapiens (Human)	573
Q16760	reviewed	DGKD_HUMAN	Diacylglycerol kinase delta (DAG kinase delta) (EC 2.7.1.107) (130 kDa diacylglycerol kinase) (Diglyceride kinase delta) (DGK-delta)	DGKD KIAA0145	Homo sapiens (Human)	1214
Q16774	reviewed	KGUA_HUMAN	Guanylate kinase (EC 2.7.4.8) (GMP kinase) (Guanylate kinase 1)	GUK1 GMK GMPK	Homo sapiens (Human)	197
Q16816	reviewed	PHKG1_HUMAN	Phosphorylase b kinase gamma catalytic chain, skeletal muscle/heart isoform (PHK-gamma-M) (EC 2.7.11.19) (Phosphorylase kinase subunit gamma-1) (Serine/threonine-protein kinase PHKG1) (EC 2.7.11.1, EC 2.7.11.26)	PHKG1 PHKG	Homo sapiens (Human)	387
Q16832	reviewed	DDR2_HUMAN	Discoidin domain-containing receptor 2 (Discoidin domain receptor 2) (EC 2.7.10.1) (CD167 antigen-like family member B) (Discoidin domain-containing receptor tyrosine kinase 2) (Neurotrophic tyrosine kinase, receptor-related 3) (Receptor protein-tyrosine kinase TKT) (Tyrosine-protein kinase TYRO10) (CD antigen CD167b)	DDR2 NTRKR3 TKT TYRO10	Homo sapiens (Human)	855
Q16854	reviewed	DGUOK_HUMAN	Deoxyguanosine kinase, mitochondrial (EC 2.7.1.113) (Deoxyadenosine kinase, mitochondrial) (EC 2.7.1.76)	DGUOK DGK	Homo sapiens (Human)	277
Q16875	reviewed	F263_HUMAN	6-phosphofructo-2-kinase/fructose-2,6-bisphosphatase 3 (6PF-2-K/Fru-2,6-P2ase 3) (PFK/FBPase 3) (6PF-2-K/Fru-2,6-P2ase brain/placenta-type isozyme) (Renal carcinoma antigen NY-REN-56) (iPFK-2) [Includes: 6-phosphofructo-2-kinase (EC 2.7.1.105); Fructose-2,6-bisphosphatase (EC 3.1.3.46)]	PFKFB3	Homo sapiens (Human)	520
Q16877	reviewed	F264_HUMAN	6-phosphofructo-2-kinase/fructose-2,6-bisphosphatase 4 (6PF-2-K/Fru-2,6-P2ase 4) (PFK/FBPase 4) (6PF-2-K/Fru-2,6-P2ase testis-type isozyme) [Includes: 6-phosphofructo-2-kinase (EC 2.7.1.105); Fructose-2,6-bisphosphatase (EC 3.1.3.46)]	PFKFB4	Homo sapiens (Human)	469
Q2M2I8	reviewed	AAK1_HUMAN	AP2-associated protein kinase 1 (EC 2.7.11.1) (Adaptor-associated kinase 1)	AAK1 KIAA1048	Homo sapiens (Human)	961
Q2TB90	reviewed	HKDC1_HUMAN	Hexokinase HKDC1 (EC 2.7.1.1) (Hexokinase domain-containing protein 1)	HKDC1	Homo sapiens (Human)	917
Q32MK0	reviewed	MYLK3_HUMAN	Myosin light chain kinase 3 (EC 2.7.11.18) (Cardiac-MyBP-C-associated Ca/CaM kinase) (Cardiac-MLCK)	MYLK3 MLCK	Homo sapiens (Human)	819
Q38SD2	reviewed	LRRK1_HUMAN	Leucine-rich repeat serine/threonine-protein kinase 1 (EC 2.7.11.1)	LRRK1 KIAA1790	Homo sapiens (Human)	2015
Q3LXA3	reviewed	TKFC_HUMAN	Triokinase/FMN cyclase (Bifunctional ATP-dependent dihydroxyacetone kinase/FAD-AMP lyase (cyclizing)) [Includes: ATP-dependent dihydroxyacetone kinase (DHA kinase) (EC 2.7.1.28) (EC 2.7.1.29) (Glycerone kinase) (Triokinase) (Triose kinase); FAD-AMP lyase (cyclizing) (EC 4.6.1.15) (FAD-AMP lyase (cyclic FMN forming)) (FMN cyclase)]	TKFC DAK	Homo sapiens (Human)	575
Q4G0N4	reviewed	NAKD2_HUMAN	NAD kinase 2, mitochondrial (EC 2.7.1.23) (Mitochondrial NAD kinase) (NAD kinase domain-containing protein 1, mitochondrial)	NADK2 C5orf33 MNADK NADKD1	Homo sapiens (Human)	442
Q504Y2	reviewed	PKDCC_HUMAN	Extracellular tyrosine-protein kinase PKDCC (EC 2.7.10.2) (Protein kinase domain-containing protein, cytoplasmic) (Protein kinase-like protein SgK493) (Sugen kinase 493) (Vertebrate lonesome kinase)	PKDCC SGK493 VLK	Homo sapiens (Human)	493
Q52WX2	reviewed	SBK1_HUMAN	Serine/threonine-protein kinase SBK1 (EC 2.7.11.1) (SH3 domain-binding kinase 1)	SBK1	Homo sapiens (Human)	424
Q53H12	reviewed	AGK_HUMAN	Acylglycerol kinase, mitochondrial (hAGK) (EC 2.7.1.107) (EC 2.7.1.138) (EC 2.7.1.94) (Multiple substrate lipid kinase) (HsMuLK) (MuLK) (Multi-substrate lipid kinase)	AGK MULK	Homo sapiens (Human)	422
Q56UN5	reviewed	M3K19_HUMAN	Mitogen-activated protein kinase kinase kinase 19 (EC 2.7.11.1) (Regulated in COPD, protein kinase) (SPS1/STE20-related protein kinase YSK4)	MAP3K19 RCK YSK4	Homo sapiens (Human)	1328
Q59H18	reviewed	TNI3K_HUMAN	Serine/threonine-protein kinase TNNI3K (EC 2.7.11.1) (Cardiac ankyrin repeat kinase) (Cardiac troponin I-interacting kinase) (TNNI3-interacting kinase)	TNNI3K CARK	Homo sapiens (Human)	835
Q5EBM0	reviewed	CMPK2_HUMAN	UMP-CMP kinase 2, mitochondrial (EC 2.7.4.14) (Nucleoside-diphosphate kinase) (EC 2.7.4.6)	CMPK2	Homo sapiens (Human)	449
Q5JZY3	reviewed	EPHAA_HUMAN	Ephrin type-A receptor 10 (EC 2.7.10.1)	EPHA10	Homo sapiens (Human)	1008
Q5KSL6	reviewed	DGKK_HUMAN	Diacylglycerol kinase kappa (DAG kinase kappa) (DGK-kappa) (EC 2.7.1.107) (142 kDa diacylglycerol kinase) (Diglyceride kinase kappa)	DGKK	Homo sapiens (Human)	1271
Q5S007	reviewed	LRRK2_HUMAN	Leucine-rich repeat serine/threonine-protein kinase 2 (EC 2.7.11.1) (EC 3.6.5.-) (Dardarin)	LRRK2 PARK8	Homo sapiens (Human)	2527
Q5SY16	reviewed	NOL9_HUMAN	Polynucleotide 5'-hydroxyl-kinase NOL9 (EC 2.7.1.78) (Nucleolar protein 9)	NOL9	Homo sapiens (Human)	702
Q5T9C9	reviewed	PI5L1_HUMAN	Phosphatidylinositol 4-phosphate 5-kinase-like protein 1 (PI(4)P 5-kinase-like protein 1) (PtdIns(4)P-5-kinase-like protein 1) (EC 2.7.1.68)	PIP5KL1	Homo sapiens (Human)	394
Q5TCS8	reviewed	KAD9_HUMAN	Adenylate kinase 9 (EC 2.7.4.4) (EC 2.7.4.6) (Adenylate kinase domain-containing protein 1) (Adenylate kinase domain-containing protein 2)	AK9 AKD1 AKD2 C6orf199 C6orf224	Homo sapiens (Human)	1911
Q5TCX8	reviewed	M3K21_HUMAN	Mitogen-activated protein kinase kinase kinase 21 (EC 2.7.11.25) (Mitogen-activated protein kinase kinase kinase MLK4) (Mixed lineage kinase 4)	MAP3K21 KIAA1804 MLK4	Homo sapiens (Human)	1036
Q5TCY1	reviewed	TTBK1_HUMAN	Tau-tubulin kinase 1 (EC 2.7.11.1) (Brain-derived tau kinase)	TTBK1 BDTK KIAA1855	Homo sapiens (Human)	1321
Q5VST9	reviewed	OBSCN_HUMAN	Obscurin (EC 2.7.11.1) (Obscurin-RhoGEF) (Obscurin-myosin light chain kinase) (Obscurin-MLCK)	OBSCN KIAA1556 KIAA1639	Homo sapiens (Human)	7968
Q5VT25	reviewed	MRCKA_HUMAN	Serine/threonine-protein kinase MRCK alpha (EC 2.7.11.1) (CDC42-binding protein kinase alpha) (DMPK-like alpha) (Myotonic dystrophy kinase-related CDC42-binding kinase alpha) (MRCK alpha) (Myotonic dystrophy protein kinase-like alpha)	CDC42BPA KIAA0451	Homo sapiens (Human)	1732
Q6A1A2	reviewed	PDPK2_HUMAN	Putative 3-phosphoinositide-dependent protein kinase 2 (EC 2.7.11.1) (3-phosphoinositide-dependent protein kinase 2 pseudogene)	PDPK2P PDPK2	Homo sapiens (Human)	396
Q6DT37	reviewed	MRCKG_HUMAN	Serine/threonine-protein kinase MRCK gamma (EC 2.7.11.1) (CDC42-binding protein kinase gamma) (DMPK-like gamma) (Myotonic dystrophy kinase-related CDC42-binding kinase gamma) (MRCK gamma) (MRCKG) (Myotonic dystrophy protein kinase-like gamma) (Myotonic dystrophy protein kinase-like alpha)	CDC42BPG DMPK2	Homo sapiens (Human)	1551
Q6IQ55	reviewed	TTBK2_HUMAN	Tau-tubulin kinase 2 (EC 2.7.11.1)	TTBK2 KIAA0847	Homo sapiens (Human)	1244
Q6J9G0	reviewed	STYK1_HUMAN	Tyrosine-protein kinase STYK1 (EC 2.7.10.2) (Novel oncogene with kinase domain) (Protein PK-unique) (Serine/threonine/tyrosine kinase 1)	STYK1 NOK	Homo sapiens (Human)	422
Q6P0Q8	reviewed	MAST2_HUMAN	Microtubule-associated serine/threonine-protein kinase 2 (EC 2.7.11.1)	MAST2 KIAA0807 MAST205	Homo sapiens (Human)	1798
Q6P2M8	reviewed	KCC1B_HUMAN	Calcium/calmodulin-dependent protein kinase type 1B (EC 2.7.11.17) (CaM kinase I beta) (CaM kinase IB) (CaM-KI beta) (CaMKI-beta) (Pregnancy up-regulated non-ubiquitously-expressed CaM kinase)	PNCK	Homo sapiens (Human)	343
Q6P3R8	reviewed	NEK5_HUMAN	Serine/threonine-protein kinase Nek5 (EC 2.7.11.1) (Never in mitosis A-related kinase 5) (NimA-related protein kinase 5)	NEK5	Homo sapiens (Human)	708
Q6P5Z2	reviewed	PKN3_HUMAN	Serine/threonine-protein kinase N3 (EC 2.7.11.13) (Protein kinase PKN-beta) (Protein-kinase C-related kinase 3)	PKN3 PKNBETA	Homo sapiens (Human)	889
Q6PFW1	reviewed	VIP1_HUMAN	Inositol hexakisphosphate and diphosphoinositol-pentakisphosphate kinase 1 (EC 2.7.4.24) (Diphosphoinositol pentakisphosphate kinase 1) (Histidine acid phosphatase domain-containing protein 2A) (IP6 kinase) (Inositol pyrophosphate synthase 1) (InsP6 and PP-IP5 kinase 1) (VIP1 homolog) (hsVIP1)	PPIP5K1 HISPPD2A IP6K IPS1 KIAA0377 VIP1	Homo sapiens (Human)	1433
Q6PHR2	reviewed	ULK3_HUMAN	Serine/threonine-protein kinase ULK3 (EC 2.7.11.1) (Unc-51-like kinase 3)	ULK3	Homo sapiens (Human)	472
Q6SA08	reviewed	TSSK4_HUMAN	Testis-specific serine/threonine-protein kinase 4 (TSK-4) (TSSK-4) (Testis-specific kinase 4) (EC 2.7.11.1) (Serine/threonine-protein kinase 22E)	TSSK4 C14orf20 STK22E TSSK5	Homo sapiens (Human)	328
Q6VAB6	reviewed	KSR2_HUMAN	Kinase suppressor of Ras 2 (hKSR2) (EC 2.7.11.1)	KSR2	Homo sapiens (Human)	950
Q6XUX3	reviewed	DUSTY_HUMAN	Dual serine/threonine and tyrosine protein kinase (EC 2.7.12.1) (Dusty protein kinase) (Dusty PK) (RIP-homologous kinase) (Receptor-interacting serine/threonine-protein kinase 5) (Sugen kinase 496) (SgK496)	DSTYK KIAA0472 RIP5 RIPK5 SGK496 HDCMD38P	Homo sapiens (Human)	929
Q6ZMQ8	reviewed	LMTK1_HUMAN	Serine/threonine-protein kinase LMTK1 (EC 2.7.11.1) (Apoptosis-associated tyrosine kinase) (AATYK) (Brain apoptosis-associated tyrosine kinase) (CDK5-binding protein) (Lemur tyrosine kinase 1) (p35-binding protein) (p35BP)	AATK AATYK KIAA0641 LMR1 LMTK1	Homo sapiens (Human)	1374
Q6ZN16	reviewed	M3K15_HUMAN	Mitogen-activated protein kinase kinase kinase 15 (EC 2.7.11.25) (Apoptosis signal-regulating kinase 3) (MAPK/ERK kinase kinase 15) (MEK kinase 15) (MEKK 15)	MAP3K15 ASK3	Homo sapiens (Human)	1313
Q6ZWH5	reviewed	NEK10_HUMAN	Serine/threonine-protein kinase Nek10 (EC 2.7.11.1) (Never in mitosis A-related kinase 10) (NimA-related protein kinase 10)	NEK10	Homo sapiens (Human)	1172
Q76MJ5	reviewed	ERN2_HUMAN	Serine/threonine-protein kinase/endoribonuclease IRE2 (Endoplasmic reticulum-to-nucleus signaling 2) (Inositol-requiring protein 2) (hIRE2p) (Ire1-beta) (IRE1b) [Includes: Serine/threonine-protein kinase (EC 2.7.11.1); Endoribonuclease (EC 3.1.26.-)]	ERN2 IRE2	Homo sapiens (Human)	926
Q7KZI7	reviewed	MARK2_HUMAN	Serine/threonine-protein kinase MARK2 (EC 2.7.11.1) (EC 2.7.11.26) (ELKL motif kinase 1) (EMK-1) (MAP/microtubule affinity-regulating kinase 2) (PAR1 homolog) (PAR1 homolog b) (Par-1b) (Par1b)	MARK2 EMK1	Homo sapiens (Human)	788
Q7L7X3	reviewed	TAOK1_HUMAN	Serine/threonine-protein kinase TAO1 (EC 2.7.11.1) (Kinase from chicken homolog B) (hKFC-B) (MARK Kinase) (MARKK) (Prostate-derived sterile 20-like kinase 2) (PSK-2) (PSK2) (Prostate-derived STE20-like kinase 2) (Thousand and one amino acid protein kinase 1) (TAOK1) (hTAOK1)	TAOK1 KIAA1361 MAP3K16 MARKK	Homo sapiens (Human)	1001
Q7Z2Y5	reviewed	NRK_HUMAN	Nik-related protein kinase (EC 2.7.11.1)	NRK	Homo sapiens (Human)	1582
Q7Z695	reviewed	ADCK2_HUMAN	Uncharacterized aarF domain-containing protein kinase 2 (EC 2.7.11.-)	ADCK2 AARF	Homo sapiens (Human)	626
Q86SG6	reviewed	NEK8_HUMAN	Serine/threonine-protein kinase Nek8 (EC 2.7.11.1) (Never in mitosis A-related kinase 8) (NimA-related protein kinase 8) (Nima-related protein kinase 12a)	NEK8 JCK NEK12A	Homo sapiens (Human)	692
Q86TB3	reviewed	ALPK2_HUMAN	Alpha-protein kinase 2 (EC 2.7.11.1) (Heart alpha-protein kinase)	ALPK2 HAK	Homo sapiens (Human)	2170
Q86TW2	reviewed	ADCK1_HUMAN	AarF domain-containing protein kinase 1 (EC 2.7.-.-)	ADCK1	Homo sapiens (Human)	530
Q86UE8	reviewed	TLK2_HUMAN	Serine/threonine-protein kinase tousled-like 2 (EC 2.7.11.1) (HsHPK) (PKU-alpha) (Tousled-like kinase 2)	TLK2	Homo sapiens (Human)	772
Q86UX6	reviewed	ST32C_HUMAN	Serine/threonine-protein kinase 32C (EC 2.7.11.1) (PKE) (Yet another novel kinase 3)	STK32C YANK3	Homo sapiens (Human)	486
Q86V86	reviewed	PIM3_HUMAN	Serine/threonine-protein kinase pim-3 (EC 2.7.11.1)	PIM3	Homo sapiens (Human)	326
Q86VZ5	reviewed	SMS1_HUMAN	Phosphatidylcholine:ceramide cholinephosphotransferase 1 (EC 2.7.8.27) (Medulla oblongata-derived protein) (Protein Mob) (Sphingomyelin synthase 1) (Transmembrane protein 23)	SGMS1 MOB SMS1 TMEM23	Homo sapiens (Human)	413
Q86XP1	reviewed	DGKH_HUMAN	Diacylglycerol kinase eta (DAG kinase eta) (EC 2.7.1.107) (Diglyceride kinase eta) (DGK-eta)	DGKH	Homo sapiens (Human)	1220
Q86Y07	reviewed	VRK2_HUMAN	Serine/threonine-protein kinase VRK2 (EC 2.7.11.1) (Vaccinia-related kinase 2)	VRK2	Homo sapiens (Human)	508
Q86YV6	reviewed	MYLK4_HUMAN	Myosin light chain kinase family member 4 (EC 2.7.11.1) (Sugen kinase 85) (SgK085)	MYLK4 SGK085	Homo sapiens (Human)	388
Q86Z02	reviewed	HIPK1_HUMAN	Homeodomain-interacting protein kinase 1 (EC 2.7.11.1) (Nuclear body-associated kinase 2)	HIPK1 KIAA0630 MYAK NBAK2	Homo sapiens (Human)	1210
Q8IU85	reviewed	KCC1D_HUMAN	Calcium/calmodulin-dependent protein kinase type 1D (EC 2.7.11.17) (CaM kinase I delta) (CaM kinase ID) (CaM-KI delta) (CaMKI delta) (CaMKID) (CaMKI-like protein kinase) (CKLiK)	CAMK1D CAMKID	Homo sapiens (Human)	385
Q8IVH8	reviewed	M4K3_HUMAN	Mitogen-activated protein kinase kinase kinase kinase 3 (EC 2.7.11.1) (Germinal center kinase-related protein kinase) (GLK) (MAPK/ERK kinase kinase kinase 3) (MEK kinase kinase 3) (MEKKK 3)	MAP4K3 RAB8IPL1	Homo sapiens (Human)	894
Q8IVS8	reviewed	GLCTK_HUMAN	Glycerate kinase (EC 2.7.1.31) (HBeAg-binding protein 4)	GLYCTK HBEBP4 LP5910	Homo sapiens (Human)	523
Q8IVT5	reviewed	KSR1_HUMAN	Kinase suppressor of Ras 1 (EC 2.7.11.1)	KSR1 KSR	Homo sapiens (Human)	923
Q8IVW4	reviewed	CDKL3_HUMAN	Cyclin-dependent kinase-like 3 (EC 2.7.11.22) (Serine/threonine-protein kinase NKIAMRE)	CDKL3 NKIAMRE	Homo sapiens (Human)	592
Q8IW41	reviewed	MAPK5_HUMAN	MAP kinase-activated protein kinase 5 (MAPK-activated protein kinase 5) (MAPKAP kinase 5) (MAPKAP-K5) (MAPKAPK-5) (MK-5) (MK5) (EC 2.7.11.1) (p38-regulated/activated protein kinase) (PRAK)	MAPKAPK5 PRAK	Homo sapiens (Human)	473
Q8IWQ3	reviewed	BRSK2_HUMAN	Serine/threonine-protein kinase BRSK2 (EC 2.7.11.1) (Brain-selective kinase 2) (EC 2.7.11.26) (Brain-specific serine/threonine-protein kinase 2) (BR serine/threonine-protein kinase 2) (Serine/threonine-protein kinase 29) (Serine/threonine-protein kinase SAD-A)	BRSK2 C11orf7 PEN11B SADA STK29 HUSSY-12	Homo sapiens (Human)	736
Q8IWU2	reviewed	LMTK2_HUMAN	Serine/threonine-protein kinase LMTK2 (EC 2.7.11.1) (Apoptosis-associated tyrosine kinase 2) (Brain-enriched kinase) (hBREK) (CDK5/p35-regulated kinase) (CPRK) (Kinase/phosphatase/inhibitor 2) (Lemur tyrosine kinase 2) (Serine/threonine-protein kinase KPI-2)	LMTK2 AATYK2 BREK KIAA1079 KPI2 LMR2	Homo sapiens (Human)	1503
Q8IXL6	reviewed	FA20C_HUMAN	Extracellular serine/threonine protein kinase FAM20C (EC 2.7.11.1) (Dentin matrix protein 4) (DMP-4) (Golgi casein kinase) (Golgi-enriched fraction casein kinase) (GEF-CK)	FAM20C DMP4	Homo sapiens (Human)	584
Q8IY84	reviewed	NIM1_HUMAN	Serine/threonine-protein kinase NIM1 (EC 2.7.11.1) (NIM1 serine/threonine-protein kinase)	NIM1K NIM1	Homo sapiens (Human)	436
Q8IYT8	reviewed	ULK2_HUMAN	Serine/threonine-protein kinase ULK2 (EC 2.7.11.1) (Unc-51-like kinase 2)	ULK2 KIAA0623	Homo sapiens (Human)	1036
Q8IZL9	reviewed	CDK20_HUMAN	Cyclin-dependent kinase 20 (EC 2.7.11.22) (CDK-activating kinase p42) (CAK-kinase p42) (Cell cycle-related kinase) (Cell division protein kinase 20) (Cyclin-dependent protein kinase H) (Cyclin-kinase-activating kinase p42)	CDK20 CCRK CDCH	Homo sapiens (Human)	346
Q8N0W3	reviewed	FCSK_HUMAN	L-fucose kinase (Fucokinase) (EC 2.7.1.52)	FCSK FUK	Homo sapiens (Human)	1084
Q8N165	reviewed	PDK1L_HUMAN	Serine/threonine-protein kinase PDIK1L (EC 2.7.11.1) (PDLIM1-interacting kinase 1-like)	PDIK1L CLIK1L	Homo sapiens (Human)	341
Q8N2I9	reviewed	STK40_HUMAN	Serine/threonine-protein kinase 40 (EC 2.7.11.1) (SINK-homologous serine/threonine-protein kinase) (Sugen kinase 495) (SgK495)	STK40 SGK495 SHIK	Homo sapiens (Human)	435
Q8N4C8	reviewed	MINK1_HUMAN	Misshapen-like kinase 1 (EC 2.7.11.1) (GCK family kinase MiNK) (MAPK/ERK kinase kinase kinase 6) (MEK kinase kinase 6) (MEKKK 6) (Misshapen/NIK-related kinase) (Mitogen-activated protein kinase kinase kinase kinase 6)	MINK1 B55 MAP4K6 MINK YSK2 ZC3	Homo sapiens (Human)	1332
Q8N568	reviewed	DCLK2_HUMAN	Serine/threonine-protein kinase DCLK2 (EC 2.7.11.1) (CaMK-like CREB regulatory kinase 2) (CL2) (CLICK-II) (CLICK2) (Doublecortin domain-containing protein 3B) (Doublecortin-like and CAM kinase-like 2) (Doublecortin-like kinase 2)	DCLK2 DCAMKL2 DCDC3B DCK2	Homo sapiens (Human)	766
Q8N5S9	reviewed	KKCC1_HUMAN	Calcium/calmodulin-dependent protein kinase kinase 1 (CaM-KK 1) (CaM-kinase kinase 1) (CaMKK 1) (EC 2.7.11.17) (CaM-kinase IV kinase) (Calcium/calmodulin-dependent protein kinase kinase alpha) (CaM-KK alpha) (CaM-kinase kinase alpha) (CaMKK alpha)	CAMKK1 CAMKKA	Homo sapiens (Human)	505
Q8N752	reviewed	KC1AL_HUMAN	Casein kinase I isoform alpha-like (CKI-alpha-like) (EC 2.7.11.1) (CK1)	CSNK1A1L	Homo sapiens (Human)	337
Q8NE63	reviewed	HIPK4_HUMAN	Homeodomain-interacting protein kinase 4 (EC 2.7.11.1)	HIPK4	Homo sapiens (Human)	616
Q8NEB9	reviewed	PK3C3_HUMAN	Phosphatidylinositol 3-kinase catalytic subunit type 3 (PI3-kinase type 3) (PI3K type 3) (PtdIns-3-kinase type 3) (EC 2.7.1.137) (Phosphatidylinositol 3-kinase p100 subunit) (Phosphoinositide-3-kinase class 3) (hVps34)	PIK3C3 VPS34	Homo sapiens (Human)	887
Q8NER5	reviewed	ACV1C_HUMAN	Activin receptor type-1C (EC 2.7.11.30) (Activin receptor type IC) (ACTR-IC) (Activin receptor-like kinase 7) (ALK-7)	ACVR1C ALK7	Homo sapiens (Human)	493
Q8NEV1	reviewed	CSK23_HUMAN	Casein kinase II subunit alpha 3 (CK II alpha 3) (EC 2.7.11.1) (Casein kinase II alpha 1 polypeptide pseudogene)	CSNK2A3 CSNK2A1P	Homo sapiens (Human)	391
Q8NEV4	reviewed	MYO3A_HUMAN	Myosin-IIIa (EC 2.7.11.1)	MYO3A	Homo sapiens (Human)	1616
Q8NFD2	reviewed	ANKK1_HUMAN	Ankyrin repeat and protein kinase domain-containing protein 1 (EC 2.7.11.1) (Protein kinase PKK2) (Sugen kinase 288) (SgK288) (X-kinase)	ANKK1 PKK2 SGK288	Homo sapiens (Human)	765
Q8NFU5	reviewed	IPMK_HUMAN	Inositol polyphosphate multikinase (EC 2.7.1.140) (EC 2.7.1.151) (EC 2.7.1.153) (Inositol 1,3,4,6-tetrakisphosphate 5-kinase)	IPMK IMPK	Homo sapiens (Human)	416
Q8NG66	reviewed	NEK11_HUMAN	Serine/threonine-protein kinase Nek11 (EC 2.7.11.1) (Never in mitosis A-related kinase 11) (NimA-related protein kinase 11)	NEK11	Homo sapiens (Human)	645
Q8NHU3	reviewed	SMS2_HUMAN	Phosphatidylcholine:ceramide cholinephosphotransferase 2 (EC 2.7.8.27) (Sphingomyelin synthase 2) (SMS2)	SGMS2 SMS2	Homo sapiens (Human)	365
Q8NI60	reviewed	COQ8A_HUMAN	Atypical kinase COQ8A, mitochondrial (EC 2.7.-.-) (Chaperone activity of bc1 complex-like) (Chaperone-ABC1-like) (Coenzyme Q protein 8A) (aarF domain-containing protein kinase 3)	COQ8A ADCK3 CABC1 PP265	Homo sapiens (Human)	647
Q8TAS1	reviewed	UHMK1_HUMAN	Serine/threonine-protein kinase Kist (EC 2.7.11.1) (Kinase interacting with stathmin) (PAM COOH-terminal interactor protein 2) (P-CIP2) (U2AF homology motif kinase 1)	UHMK1 KIS KIST	Homo sapiens (Human)	419
Q8TBX8	reviewed	PI42C_HUMAN	Phosphatidylinositol 5-phosphate 4-kinase type-2 gamma (EC 2.7.1.149) (Phosphatidylinositol 5-phosphate 4-kinase type II gamma) (PI(5)P 4-kinase type II gamma) (PIP4KII-gamma)	PIP4K2C PIP5K2C	Homo sapiens (Human)	421
Q8TCG2	reviewed	P4K2B_HUMAN	Phosphatidylinositol 4-kinase type 2-beta (EC 2.7.1.67) (Phosphatidylinositol 4-kinase type II-beta) (PI4KII-BETA)	PI4K2B	Homo sapiens (Human)	481
Q8TCT0	reviewed	CERK1_HUMAN	Ceramide kinase (hCERK) (EC 2.7.1.138) (Acylsphingosine kinase) (Lipid kinase 4) (LK4)	CERK KIAA1646	Homo sapiens (Human)	537
Q8TD08	reviewed	MK15_HUMAN	Mitogen-activated protein kinase 15 (MAP kinase 15) (MAPK 15) (EC 2.7.11.24) (Extracellular signal-regulated kinase 7) (ERK-7) (Extracellular signal-regulated kinase 8) (ERK-8)	MAPK15 ERK7 ERK8	Homo sapiens (Human)	544
Q8TD19	reviewed	NEK9_HUMAN	Serine/threonine-protein kinase Nek9 (EC 2.7.11.1) (Nercc1 kinase) (Never in mitosis A-related kinase 9) (NimA-related protein kinase 9) (NimA-related kinase 8) (Nek8)	NEK9 KIAA1995 NEK8 NERCC	Homo sapiens (Human)	979
Q8TDC3	reviewed	BRSK1_HUMAN	Serine/threonine-protein kinase BRSK1 (EC 2.7.11.1) (Brain-selective kinase 1) (EC 2.7.11.26) (Brain-specific serine/threonine-protein kinase 1) (BR serine/threonine-protein kinase 1) (Serine/threonine-protein kinase SAD-B) (Synapses of Amphids Defective homolog 1) (SAD1 homolog) (hSAD1)	BRSK1 KIAA1811 SAD1 SADB	Homo sapiens (Human)	778
Q8TDR2	reviewed	STK35_HUMAN	Serine/threonine-protein kinase 35 (EC 2.7.11.1) (CLP-36-interacting kinase 1) (CLIK-1) (PDLIM1-interacting kinase 1) (Serine/threonine-protein kinase 35 L1)	STK35 CLIK1 PDIK1 STK35L1	Homo sapiens (Human)	534
Q8TDX7	reviewed	NEK7_HUMAN	Serine/threonine-protein kinase Nek7 (EC 2.7.11.34) (Never in mitosis A-related kinase 7) (NimA-related protein kinase 7)	NEK7	Homo sapiens (Human)	302
Q8TE04	reviewed	PANK1_HUMAN	Pantothenate kinase 1 (hPanK) (hPanK1) (EC 2.7.1.33) (Pantothenic acid kinase 1)	PANK1 PANK	Homo sapiens (Human)	598
Q8TF76	reviewed	HASP_HUMAN	Serine/threonine-protein kinase haspin (EC 2.7.11.1) (Germ cell-specific gene 2 protein) (H-haspin) (Haploid germ cell-specific nuclear protein kinase)	HASPIN GSG2	Homo sapiens (Human)	798
Q8WTQ7	reviewed	GRK7_HUMAN	Rhodopsin kinase GRK7 (EC 2.7.11.14) (G protein-coupled receptor kinase 7) (G protein-coupled receptor kinase GRK7)	GRK7 GPRK7	Homo sapiens (Human)	553
Q8WU08	reviewed	ST32A_HUMAN	Serine/threonine-protein kinase 32A (EC 2.7.11.1) (Yet another novel kinase 1)	STK32A YANK1	Homo sapiens (Human)	396
Q8WXR4	reviewed	MYO3B_HUMAN	Myosin-IIIb (EC 2.7.11.1)	MYO3B	Homo sapiens (Human)	1341
Q8WZ42	reviewed	TITIN_HUMAN	Titin (EC 2.7.11.1) (Connectin) (Rhabdomyosarcoma antigen MU-RMS-40.14)	TTN	Homo sapiens (Human)	34350
Q92551	reviewed	IP6K1_HUMAN	Inositol hexakisphosphate kinase 1 (InsP6 kinase 1) (EC 2.7.4.21) (Inositol hexaphosphate kinase 1)	IP6K1 IHPK1 KIAA0263	Homo sapiens (Human)	441
Q92630	reviewed	DYRK2_HUMAN	Dual specificity tyrosine-phosphorylation-regulated kinase 2 (EC 2.7.12.1)	DYRK2	Homo sapiens (Human)	601
Q92772	reviewed	CDKL2_HUMAN	Cyclin-dependent kinase-like 2 (EC 2.7.11.22) (Protein kinase p56 KKIAMRE) (Serine/threonine-protein kinase KKIAMRE)	CDKL2	Homo sapiens (Human)	493
Q92918	reviewed	M4K1_HUMAN	Mitogen-activated protein kinase kinase kinase kinase 1 (EC 2.7.11.1) (Hematopoietic progenitor kinase) (MAPK/ERK kinase kinase kinase 1) (MEK kinase kinase 1) (MEKKK 1)	MAP4K1 HPK1	Homo sapiens (Human)	833
Q92989	reviewed	CLP1_HUMAN	Polyribonucleotide 5'-hydroxyl-kinase Clp1 (EC 2.7.1.78) (Polyadenylation factor Clp1) (Polynucleotide kinase Clp1) (Pre-mRNA cleavage complex II protein Clp1)	CLP1 HEAB	Homo sapiens (Human)	425
Q969G6	reviewed	RIFK_HUMAN	Riboflavin kinase (EC 2.7.1.26) (ATP:riboflavin 5'-phosphotransferase) (Flavokinase)	RFK	Homo sapiens (Human)	155
Q96BR1	reviewed	SGK3_HUMAN	Serine/threonine-protein kinase Sgk3 (EC 2.7.11.1) (Cytokine-independent survival kinase) (Serum/glucocorticoid-regulated kinase 3) (Serum/glucocorticoid-regulated kinase-like)	SGK3 CISK SGKL	Homo sapiens (Human)	496
Q96C11	reviewed	FGGY_HUMAN	FGGY carbohydrate kinase domain-containing protein (D-ribulokinase FGGY) (EC 2.7.1.47)	FGGY	Homo sapiens (Human)	551
Q96C45	reviewed	ULK4_HUMAN	Serine/threonine-protein kinase ULK4 (EC 2.7.11.1) (Unc-51-like kinase 4)	ULK4	Homo sapiens (Human)	1275
Q96D53	reviewed	COQ8B_HUMAN	Atypical kinase COQ8B, mitochondrial (EC 2.7.-.-) (AarF domain-containing protein kinase 4) (Coenzyme Q protein 8B)	COQ8B ADCK4	Homo sapiens (Human)	544
Q96DU7	reviewed	IP3KC_HUMAN	Inositol-trisphosphate 3-kinase C (EC 2.7.1.127) (Inositol 1,4,5-trisphosphate 3-kinase C) (IP3 3-kinase C) (IP3K C) (InsP 3-kinase C)	ITPKC IP3KC	Homo sapiens (Human)	683
Q96GD4	reviewed	AURKB_HUMAN	Aurora kinase B (EC 2.7.11.1) (Aurora 1) (Aurora- and IPL1-like midbody-associated protein 1) (AIM-1) (Aurora/IPL1-related kinase 2) (ARK-2) (Aurora-related kinase 2) (STK-1) (Serine/threonine-protein kinase 12) (Serine/threonine-protein kinase 5) (Serine/threonine-protein kinase aurora-B)	AURKB AIK2 AIM1 AIRK2 ARK2 STK1 STK12 STK5	Homo sapiens (Human)	344
Q96GX5	reviewed	GWL_HUMAN	Serine/threonine-protein kinase greatwall (GW) (GWL) (hGWL) (EC 2.7.11.1) (Microtubule-associated serine/threonine-protein kinase-like) (MAST-L)	MASTL GW GWL THC2	Homo sapiens (Human)	879
Q96J92	reviewed	WNK4_HUMAN	Serine/threonine-protein kinase WNK4 (EC 2.7.11.1) (Protein kinase lysine-deficient 4) (Protein kinase with no lysine 4)	WNK4 PRKWNK4	Homo sapiens (Human)	1243
Q96KB5	reviewed	TOPK_HUMAN	Lymphokine-activated killer T-cell-originated protein kinase (EC 2.7.12.2) (Cancer/testis antigen 84) (CT84) (MAPKK-like protein kinase) (Nori-3) (PDZ-binding kinase) (Spermatogenesis-related protein kinase) (SPK) (T-LAK cell-originated protein kinase)	PBK TOPK	Homo sapiens (Human)	322
Q96L34	reviewed	MARK4_HUMAN	MAP/microtubule affinity-regulating kinase 4 (EC 2.7.11.1) (MAP/microtubule affinity-regulating kinase-like 1)	MARK4 KIAA1860 MARKL1	Homo sapiens (Human)	752
Q96L96	reviewed	ALPK3_HUMAN	Alpha-protein kinase 3 (EC 2.7.11.1) (Muscle alpha-protein kinase)	ALPK3 KIAA1330 MAK	Homo sapiens (Human)	1705
Q96LW2	reviewed	KS6R_HUMAN	Ribosomal protein S6 kinase-related protein (EC 2.7.11.1) (Sugen kinase 494)	RSKR SGK494	Homo sapiens (Human)	410
Q96M32	reviewed	KAD7_HUMAN	Adenylate kinase 7 (AK 7) (EC 2.7.4.3) (EC 2.7.4.6) (ATP-AMP transphosphorylase 7)	AK7	Homo sapiens (Human)	723
Q96MA6	reviewed	KAD8_HUMAN	Adenylate kinase 8 (AK 8) (EC 2.7.4.3) (EC 2.7.4.6) (ATP-AMP transphosphorylase 8)	AK8 C9orf98	Homo sapiens (Human)	479
Q96NX5	reviewed	KCC1G_HUMAN	Calcium/calmodulin-dependent protein kinase type 1G (EC 2.7.11.17) (CaM kinase I gamma) (CaM kinase IG) (CaM-KI gamma) (CaMKI gamma) (CaMKIG) (CaMK-like CREB kinase III) (CLICK III)	CAMK1G CLICK3 VWS1	Homo sapiens (Human)	476
Q96PC2	reviewed	IP6K3_HUMAN	Inositol hexakisphosphate kinase 3 (InsP6 kinase 3) (EC 2.7.4.21) (Inositol hexaphosphate kinase 3)	IP6K3 IHPK3	Homo sapiens (Human)	410
Q96PF2	reviewed	TSSK2_HUMAN	Testis-specific serine/threonine-protein kinase 2 (TSK-2) (TSK2) (TSSK-2) (Testis-specific kinase 2) (EC 2.7.11.1) (DiGeorge syndrome protein G) (DGS-G) (Serine/threonine-protein kinase 22B)	TSSK2 DGSG SPOGA2 STK22B	Homo sapiens (Human)	358
Q96PN8	reviewed	TSSK3_HUMAN	Testis-specific serine/threonine-protein kinase 3 (TSK-3) (TSSK-3) (Testis-specific kinase 3) (EC 2.7.11.1) (Serine/threonine-protein kinase 22C)	TSSK3 SPOGA3 STK22C	Homo sapiens (Human)	268
Q96PY6	reviewed	NEK1_HUMAN	Serine/threonine-protein kinase Nek1 (EC 2.7.11.1) (Never in mitosis A-related kinase 1) (NimA-related protein kinase 1) (Renal carcinoma antigen NY-REN-55)	NEK1 KIAA1901	Homo sapiens (Human)	1258
Q96Q04	reviewed	LMTK3_HUMAN	Serine/threonine-protein kinase LMTK3 (EC 2.7.11.1) (Lemur tyrosine kinase 3)	LMTK3 KIAA1883 TYKLM3	Homo sapiens (Human)	1460
Q96Q15	reviewed	SMG1_HUMAN	Serine/threonine-protein kinase SMG1 (SMG-1) (hSMG-1) (EC 2.7.11.1) (Lambda/iota protein kinase C-interacting protein) (Lambda-interacting protein) (Nonsense mediated mRNA decay-associated PI3K-related kinase SMG1)	SMG1 ATX KIAA0421 LIP	Homo sapiens (Human)	3661
Q96Q40	reviewed	CDK15_HUMAN	Cyclin-dependent kinase 15 (EC 2.7.11.22) (Amyotrophic lateral sclerosis 2 chromosomal region candidate gene 7 protein) (Cell division protein kinase 15) (Serine/threonine-protein kinase ALS2CR7) (Serine/threonine-protein kinase PFTAIRE-2)	CDK15 ALS2CR7 PFTK2	Homo sapiens (Human)	435
Q96QP1	reviewed	ALPK1_HUMAN	Alpha-protein kinase 1 (EC 2.7.11.1) (Chromosome 4 kinase) (Lymphocyte alpha-protein kinase)	ALPK1 KIAA1527 LAK	Homo sapiens (Human)	1244
Q96QS6	reviewed	PSKH2_HUMAN	Serine/threonine-protein kinase H2 (EC 2.7.11.1) (Protein serine kinase H2) (PSK-H2)	PSKH2	Homo sapiens (Human)	385
Q96QT4	reviewed	TRPM7_HUMAN	Transient receptor potential cation channel subfamily M member 7 (EC 2.7.11.1) (Channel-kinase 1) (Long transient receptor potential channel 7) (LTrpC-7) (LTrpC7) [Cleaved into: TRPM7 kinase, cleaved form (M7CK); TRPM7 channel, cleaved form]	TRPM7 CHAK1 LTRPC7	Homo sapiens (Human)	1865
Q96RG2	reviewed	PASK_HUMAN	PAS domain-containing serine/threonine-protein kinase (PAS-kinase) (PASKIN) (hPASK) (EC 2.7.11.1)	PASK KIAA0135	Homo sapiens (Human)	1323
Q96RR4	reviewed	KKCC2_HUMAN	Calcium/calmodulin-dependent protein kinase kinase 2 (CaM-KK 2) (CaM-kinase kinase 2) (CaMKK 2) (EC 2.7.11.17) (Calcium/calmodulin-dependent protein kinase kinase beta) (CaM-KK beta) (CaM-kinase kinase beta) (CaMKK beta)	CAMKK2 CAMKKB KIAA0787	Homo sapiens (Human)	588
Q96S38	reviewed	KS6C1_HUMAN	Ribosomal protein S6 kinase delta-1 (S6K-delta-1) (EC 2.7.11.1) (52 kDa ribosomal protein S6 kinase) (Ribosomal S6 kinase-like protein with two PSK domains 118 kDa protein) (SPHK1-binding protein)	RPS6KC1 RPK118	Homo sapiens (Human)	1066
Q96S44	reviewed	PRPK_HUMAN	EKC/KEOPS complex subunit TP53RK (EC 3.6.-.-) (Atypical serine/threonine protein kinase TP53RK) (Nori-2) (TP53-regulating kinase) (EC 2.7.11.1) (p53-related protein kinase)	TP53RK C20orf64 PRPK	Homo sapiens (Human)	253
Q96S53	reviewed	TESK2_HUMAN	Dual specificity testis-specific protein kinase 2 (EC 2.7.12.1) (Testicular protein kinase 2)	TESK2	Homo sapiens (Human)	571
Q96SB4	reviewed	SRPK1_HUMAN	SRSF protein kinase 1 (EC 2.7.11.1) (SFRS protein kinase 1) (Serine/arginine-rich protein-specific kinase 1) (SR-protein-specific kinase 1)	SRPK1	Homo sapiens (Human)	655
Q96T60	reviewed	PNKP_HUMAN	Bifunctional polynucleotide phosphatase/kinase (DNA 5'-kinase/3'-phosphatase) (Polynucleotide kinase-3'-phosphatase) [Includes: Polynucleotide 3'-phosphatase (EC 3.1.3.32) (2'(3')-polynucleotidase); Polynucleotide 5'-hydroxyl-kinase (EC 2.7.1.78)]	PNKP	Homo sapiens (Human)	521
Q99558	reviewed	M3K14_HUMAN	Mitogen-activated protein kinase kinase kinase 14 (EC 2.7.11.25) (NF-kappa-beta-inducing kinase) (HsNIK) (Serine/threonine-protein kinase NIK)	MAP3K14 NIK	Homo sapiens (Human)	947
Q99570	reviewed	PI3R4_HUMAN	Phosphoinositide 3-kinase regulatory subunit 4 (PI3-kinase regulatory subunit 4) (EC 2.7.11.1) (PI3-kinase p150 subunit) (Phosphoinositide 3-kinase adaptor protein)	PIK3R4 VPS15	Homo sapiens (Human)	1358
Q99611	reviewed	SPS2_HUMAN	Selenide, water dikinase 2 (EC 2.7.9.3) (Selenium donor protein 2) (Selenophosphate synthase 2)	SEPHS2 SPS2	Homo sapiens (Human)	448
Q99640	reviewed	PMYT1_HUMAN	Membrane-associated tyrosine- and threonine-specific cdc2-inhibitory kinase (EC 2.7.11.1) (Myt1 kinase)	PKMYT1 MYT1	Homo sapiens (Human)	499
Q99683	reviewed	M3K5_HUMAN	Mitogen-activated protein kinase kinase kinase 5 (EC 2.7.11.25) (Apoptosis signal-regulating kinase 1) (ASK-1) (MAPK/ERK kinase kinase 5) (MEK kinase 5) (MEKK 5)	MAP3K5 ASK1 MAPKKK5 MEKK5	Homo sapiens (Human)	1374
Q99755	reviewed	PI51A_HUMAN	Phosphatidylinositol 4-phosphate 5-kinase type-1 alpha (PIP5K1-alpha) (PtdIns(4)P-5-kinase 1 alpha) (EC 2.7.1.68) (68 kDa type I phosphatidylinositol 4-phosphate 5-kinase alpha) (Phosphatidylinositol 4-phosphate 5-kinase type I alpha) (PIP5KIalpha)	PIP5K1A	Homo sapiens (Human)	562
Q99759	reviewed	M3K3_HUMAN	Mitogen-activated protein kinase kinase kinase 3 (EC 2.7.11.25) (MAPK/ERK kinase kinase 3) (MEK kinase 3) (MEKK 3)	MAP3K3 MAPKKK3 MEKK3	Homo sapiens (Human)	626
Q99986	reviewed	VRK1_HUMAN	Serine/threonine-protein kinase VRK1 (EC 2.7.11.1) (Vaccinia-related kinase 1)	VRK1	Homo sapiens (Human)	396
Q9BQI3	reviewed	E2AK1_HUMAN	Eukaryotic translation initiation factor 2-alpha kinase 1 (EC 2.7.11.1) (Heme-controlled repressor) (HCR) (Heme-regulated eukaryotic initiation factor eIF-2-alpha kinase) (Heme-regulated inhibitor) (hHRI) (Hemin-sensitive initiation factor 2-alpha kinase)	EIF2AK1 HRI KIAA1369 PRO1362	Homo sapiens (Human)	630
Q9BRR6	reviewed	ADPGK_HUMAN	ADP-dependent glucokinase (ADP-GK) (ADPGK) (EC 2.7.1.147) (RbBP-35)	ADPGK PSEC0260	Homo sapiens (Human)	497
Q9BRS2	reviewed	RIOK1_HUMAN	Serine/threonine-protein kinase RIO1 (EC 2.7.11.1) (EC 3.6.3.-) (RIO kinase 1)	RIOK1 RIO1	Homo sapiens (Human)	568
Q9BTU6	reviewed	P4K2A_HUMAN	Phosphatidylinositol 4-kinase type 2-alpha (EC 2.7.1.67) (Phosphatidylinositol 4-kinase type II-alpha)	PI4K2A	Homo sapiens (Human)	479
Q9BUB5	reviewed	MKNK1_HUMAN	MAP kinase-interacting serine/threonine-protein kinase 1 (EC 2.7.11.1) (MAP kinase signal-integrating kinase 1) (MAPK signal-integrating kinase 1) (Mnk1)	MKNK1 MNK1	Homo sapiens (Human)	465
Q9BVS4	reviewed	RIOK2_HUMAN	Serine/threonine-protein kinase RIO2 (EC 2.7.11.1) (RIO kinase 2)	RIOK2 RIO2	Homo sapiens (Human)	552
Q9BWU1	reviewed	CDK19_HUMAN	Cyclin-dependent kinase 19 (EC 2.7.11.22) (CDC2-related protein kinase 6) (Cell division cycle 2-like protein kinase 6) (Cell division protein kinase 19) (Cyclin-dependent kinase 11) (Death-preventing kinase)	CDK19 CDC2L6 CDK11 KIAA1028	Homo sapiens (Human)	502
Q9BX84	reviewed	TRPM6_HUMAN	Transient receptor potential cation channel subfamily M member 6 (EC 2.7.11.1) (Channel kinase 2) (Melastatin-related TRP cation channel 6) [Cleaved into: TRPM6 kinase, cleaved form]	TRPM6 CHAK2	Homo sapiens (Human)	2022
Q9BXA6	reviewed	TSSK6_HUMAN	Testis-specific serine/threonine-protein kinase 6 (TSK-6) (TSSK-6) (Testis-specific kinase 6) (EC 2.7.11.1) (Cancer/testis antigen 72) (CT72) (Serine/threonine-protein kinase SSTK) (Small serine/threonine kinase)	TSSK6 SSTK FKSG82	Homo sapiens (Human)	273
Q9BXA7	reviewed	TSSK1_HUMAN	Testis-specific serine/threonine-protein kinase 1 (TSK-1) (TSK1) (TSSK-1) (Testis-specific kinase 1) (EC 2.7.11.1) (Serine/threonine-protein kinase 22A)	TSSK1B SPOGA1 SPOGA4 STK22A STK22D TSSK1 FKSG81	Homo sapiens (Human)	367
Q9BXM7	reviewed	PINK1_HUMAN	Serine/threonine-protein kinase PINK1, mitochondrial (EC 2.7.11.1) (BRPK) (PTEN-induced putative kinase protein 1)	PINK1	Homo sapiens (Human)	581
Q9BXU1	reviewed	STK31_HUMAN	Serine/threonine-protein kinase 31 (EC 2.7.11.1) (Serine/threonine-protein kinase NYD-SPK) (Sugen kinase 396) (SgK396)	STK31 SGK396	Homo sapiens (Human)	1019
Q9BYP7	reviewed	WNK3_HUMAN	Serine/threonine-protein kinase WNK3 (EC 2.7.11.1) (Protein kinase lysine-deficient 3) (Protein kinase with no lysine 3)	WNK3 KIAA1566 PRKWNK3	Homo sapiens (Human)	1800
Q9BYT3	reviewed	STK33_HUMAN	Serine/threonine-protein kinase 33 (EC 2.7.11.1)	STK33	Homo sapiens (Human)	514
Q9BZ23	reviewed	PANK2_HUMAN	Pantothenate kinase 2, mitochondrial (hPanK2) (EC 2.7.1.33) (Pantothenic acid kinase 2) [Cleaved into: Pantothenate kinase 2, mitochondrial intermediate form (iPanK2); Pantothenate kinase 2, mitochondrial mature form (mPanK2)]	PANK2 C20orf48	Homo sapiens (Human)	570
Q9BZL6	reviewed	KPCD2_HUMAN	Serine/threonine-protein kinase D2 (EC 2.7.11.13) (nPKC-D2)	PRKD2 PKD2 HSPC187	Homo sapiens (Human)	878
Q9BZX2	reviewed	UCK2_HUMAN	Uridine-cytidine kinase 2 (UCK 2) (EC 2.7.1.48) (Cytidine monophosphokinase 2) (Testis-specific protein TSA903) (Uridine monophosphokinase 2)	UCK2 UMPK	Homo sapiens (Human)	261
Q9C098	reviewed	DCLK3_HUMAN	Serine/threonine-protein kinase DCLK3 (EC 2.7.11.1) (Doublecortin domain-containing protein 3C) (Doublecortin-like and CAM kinase-like 3) (Doublecortin-like kinase 3)	DCLK3 DCAMKL3 DCDC3C KIAA1765	Homo sapiens (Human)	648
Q9H093	reviewed	NUAK2_HUMAN	NUAK family SNF1-like kinase 2 (EC 2.7.11.1) (Omphalocele kinase 2) (SNF1/AMP kinase-related kinase) (SNARK)	NUAK2 OMPHK2 SNARK	Homo sapiens (Human)	628
Q9H0K1	reviewed	SIK2_HUMAN	Serine/threonine-protein kinase SIK2 (EC 2.7.11.1) (Qin-induced kinase) (Salt-inducible kinase 2) (SIK-2) (Serine/threonine-protein kinase SNF1-like kinase 2)	SIK2 KIAA0781 QIK SNF1LK2	Homo sapiens (Human)	926
Q9H1R3	reviewed	MYLK2_HUMAN	Myosin light chain kinase 2, skeletal/cardiac muscle (MLCK2) (EC 2.7.11.18)	MYLK2	Homo sapiens (Human)	596
Q9H2G2	reviewed	SLK_HUMAN	STE20-like serine/threonine-protein kinase (STE20-like kinase) (hSLK) (EC 2.7.11.1) (CTCL tumor antigen se20-9) (STE20-related serine/threonine-protein kinase) (STE20-related kinase) (Serine/threonine-protein kinase 2)	SLK KIAA0204 STK2	Homo sapiens (Human)	1235
Q9H2K8	reviewed	TAOK3_HUMAN	Serine/threonine-protein kinase TAO3 (EC 2.7.11.1) (Cutaneous T-cell lymphoma-associated antigen HD-CL-09) (CTCL-associated antigen HD-CL-09) (Dendritic cell-derived protein kinase) (JNK/SAPK-inhibitory kinase) (Jun kinase-inhibitory kinase) (Kinase from chicken homolog A) (hKFC-A) (Thousand and one amino acid protein 3)	TAOK3 DPK JIK KDS MAP3K18	Homo sapiens (Human)	898
Q9H2X6	reviewed	HIPK2_HUMAN	Homeodomain-interacting protein kinase 2 (hHIPk2) (EC 2.7.11.1)	HIPK2	Homo sapiens (Human)	1198
Q9H3S4	reviewed	TPK1_HUMAN	Thiamine pyrophosphokinase 1 (hTPK1) (EC 2.7.6.-) (Placental protein 20) (PP20) (Thiamin pyrophosphokinase 1)	TPK1	Homo sapiens (Human)	243
Q9H3Y6	reviewed	SRMS_HUMAN	Tyrosine-protein kinase Srms (EC 2.7.10.2)	SRMS C20orf148	Homo sapiens (Human)	488
Q9H422	reviewed	HIPK3_HUMAN	Homeodomain-interacting protein kinase 3 (EC 2.7.11.1) (Androgen receptor-interacting nuclear protein kinase) (ANPK) (Fas-interacting serine/threonine-protein kinase) (FIST) (Homolog of protein kinase YAK1)	HIPK3 DYRK6 FIST3 PKY	Homo sapiens (Human)	1215
Q9H477	reviewed	RBSK_HUMAN	Ribokinase (RK) (EC 2.7.1.15)	RBKS RBSK	Homo sapiens (Human)	322
Q9H479	reviewed	FN3K_HUMAN	Fructosamine-3-kinase (EC 2.7.1.171) (Protein-psicosamine 3-kinase FN3K) (Protein-ribulosamine 3-kinase FN3K) (EC 2.7.1.172)	FN3K	Homo sapiens (Human)	309
Q9H4A3	reviewed	WNK1_HUMAN	Serine/threonine-protein kinase WNK1 (EC 2.7.11.1) (Erythrocyte 65 kDa protein) (p65) (Kinase deficient protein) (Protein kinase lysine-deficient 1) (Protein kinase with no lysine 1) (hWNK1)	WNK1 HSN2 KDP KIAA0344 PRKWNK1	Homo sapiens (Human)	2382
Q9H4B4	reviewed	PLK3_HUMAN	Serine/threonine-protein kinase PLK3 (EC 2.7.11.21) (Cytokine-inducible serine/threonine-protein kinase) (FGF-inducible kinase) (Polo-like kinase 3) (PLK-3) (Proliferation-related kinase)	PLK3 CNK FNK PRK	Homo sapiens (Human)	646
Q9H5K3	reviewed	SG196_HUMAN	Protein O-mannose kinase (POMK) (EC 2.7.1.183) (Protein kinase-like protein SgK196) (Sugen kinase 196)	POMK SGK196	Homo sapiens (Human)	350
Q9H8X2	reviewed	IPPK_HUMAN	Inositol-pentakisphosphate 2-kinase (EC 2.7.1.158) (IPK1 homolog) (Inositol-1,3,4,5,6-pentakisphosphate 2-kinase) (Ins(1,3,4,5,6)P5 2-kinase) (InsP5 2-kinase)	IPPK C9orf12	Homo sapiens (Human)	491
Q9H999	reviewed	PANK3_HUMAN	Pantothenate kinase 3 (hPanK3) (EC 2.7.1.33) (Pantothenic acid kinase 3)	PANK3	Homo sapiens (Human)	370
Q9HA47	reviewed	UCK1_HUMAN	Uridine-cytidine kinase 1 (UCK 1) (EC 2.7.1.48) (Cytidine monophosphokinase 1) (Uridine monophosphokinase 1)	UCK1 URK1	Homo sapiens (Human)	277
Q9HAZ1	reviewed	CLK4_HUMAN	Dual specificity protein kinase CLK4 (EC 2.7.12.1) (CDC-like kinase 4)	CLK4	Homo sapiens (Human)	481
Q9HBH9	reviewed	MKNK2_HUMAN	MAP kinase-interacting serine/threonine-protein kinase 2 (EC 2.7.11.1) (MAP kinase signal-integrating kinase 2) (MAPK signal-integrating kinase 2) (Mnk2)	MKNK2 GPRK7 MNK2	Homo sapiens (Human)	465
Q9HBU6	reviewed	EKI1_HUMAN	Ethanolamine kinase 1 (EKI 1) (EC 2.7.1.82)	ETNK1 EKI1	Homo sapiens (Human)	452
Q9HBY8	reviewed	SGK2_HUMAN	Serine/threonine-protein kinase Sgk2 (EC 2.7.11.1) (Serum/glucocorticoid-regulated kinase 2)	SGK2	Homo sapiens (Human)	367
Q9HC98	reviewed	NEK6_HUMAN	Serine/threonine-protein kinase Nek6 (EC 2.7.11.34) (Never in mitosis A-related kinase 6) (NimA-related protein kinase 6) (Protein kinase SID6-1512)	NEK6	Homo sapiens (Human)	313
Q9HCP0	reviewed	KC1G1_HUMAN	Casein kinase I isoform gamma-1 (CKI-gamma 1) (EC 2.7.11.1)	CSNK1G1	Homo sapiens (Human)	422
Q9NPI5	reviewed	NRK2_HUMAN	Nicotinamide riboside kinase 2 (NRK 2) (NmR-K 2) (EC 2.7.1.22) (Integrin beta-1-binding protein 3) (Muscle integrin-binding protein) (MIBP) (Nicotinic acid riboside kinase 2) (EC 2.7.1.173) (Ribosylnicotinamide kinase 2) (RNK 2) (Ribosylnicotinic acid kinase 2)	NMRK2 ITGB1BP3 NRK2	Homo sapiens (Human)	230
Q9NQU5	reviewed	PAK6_HUMAN	Serine/threonine-protein kinase PAK 6 (EC 2.7.11.1) (PAK-5) (p21-activated kinase 6) (PAK-6)	PAK6 PAK5	Homo sapiens (Human)	681
Q9NR20	reviewed	DYRK4_HUMAN	Dual specificity tyrosine-phosphorylation-regulated kinase 4 (EC 2.7.12.1)	DYRK4	Homo sapiens (Human)	520
Q9NRA0	reviewed	SPHK2_HUMAN	Sphingosine kinase 2 (SK 2) (SPK 2) (EC 2.7.1.91)	SPHK2 SK2	Homo sapiens (Human)	654
Q9NRH2	reviewed	SNRK_HUMAN	SNF-related serine/threonine-protein kinase (EC 2.7.11.1) (SNF1-related kinase)	SNRK KIAA0096 SNFRK	Homo sapiens (Human)	765
Q9NRM7	reviewed	LATS2_HUMAN	Serine/threonine-protein kinase LATS2 (EC 2.7.11.1) (Kinase phosphorylated during mitosis protein) (Large tumor suppressor homolog 2) (Serine/threonine-protein kinase kpm) (Warts-like kinase)	LATS2 KPM	Homo sapiens (Human)	1088
Q9NRP7	reviewed	STK36_HUMAN	Serine/threonine-protein kinase 36 (EC 2.7.11.1) (Fused homolog)	STK36 KIAA1278	Homo sapiens (Human)	1315
Q9NSY1	reviewed	BMP2K_HUMAN	BMP-2-inducible protein kinase (BIKe) (EC 2.7.11.1)	BMP2K BIKE HRIHFB2017	Homo sapiens (Human)	1161
Q9NVF9	reviewed	EKI2_HUMAN	Ethanolamine kinase 2 (EKI 2) (EC 2.7.1.82) (Ethanolamine kinase-like protein)	ETNK2 EKI2 HMFT1716	Homo sapiens (Human)	386
Q9NWW6	reviewed	NRK1_HUMAN	Nicotinamide riboside kinase 1 (NRK 1) (NmR-K 1) (EC 2.7.1.22) (Nicotinic acid riboside kinase 1) (EC 2.7.1.173) (Ribosylnicotinamide kinase 1) (RNK 1) (Ribosylnicotinic acid kinase 1)	NMRK1 C9orf95 NRK1	Homo sapiens (Human)	199
Q9NWZ3	reviewed	IRAK4_HUMAN	Interleukin-1 receptor-associated kinase 4 (IRAK-4) (EC 2.7.11.1) (Renal carcinoma antigen NY-REN-64)	IRAK4	Homo sapiens (Human)	460
Q9NWZ5	reviewed	UCKL1_HUMAN	Uridine-cytidine kinase-like 1 (EC 2.7.1.48)	UCKL1 URKL1 F538	Homo sapiens (Human)	548
Q9NY57	reviewed	ST32B_HUMAN	Serine/threonine-protein kinase 32B (EC 2.7.11.1) (Yet another novel kinase 2)	STK32B YANK2 UNQ3003/PRO9744	Homo sapiens (Human)	414
Q9NYA1	reviewed	SPHK1_HUMAN	Sphingosine kinase 1 (SK 1) (SPK 1) (EC 2.7.1.91) (Acetyltransferase SPHK1) (EC 2.3.1.-)	SPHK1 SK1 SPHK SPK	Homo sapiens (Human)	384
Q9NYL2	reviewed	M3K20_HUMAN	Mitogen-activated protein kinase kinase kinase 20 (EC 2.7.11.25) (Human cervical cancer suppressor gene 4 protein) (HCCS-4) (Leucine zipper- and sterile alpha motif-containing kinase) (MLK-like mitogen-activated protein triple kinase) (Mitogen-activated protein kinase kinase kinase MLT) (Mixed lineage kinase 7) (Mixed lineage kinase-related kinase) (MLK-related kinase) (MRK) (Sterile alpha motif-…	MAP3K20 MLK7 MLTK ZAK HCCS4	Homo sapiens (Human)	800
Q9NYV4	reviewed	CDK12_HUMAN	Cyclin-dependent kinase 12 (EC 2.7.11.22) (EC 2.7.11.23) (Cdc2-related kinase, arginine/serine-rich) (CrkRS) (Cell division cycle 2-related protein kinase 7) (CDC2-related protein kinase 7) (Cell division protein kinase 12) (hCDK12)	CDK12 CRK7 CRKRS KIAA0904	Homo sapiens (Human)	1490
Q9NYY3	reviewed	PLK2_HUMAN	Serine/threonine-protein kinase PLK2 (EC 2.7.11.21) (Polo-like kinase 2) (PLK-2) (hPlk2) (Serine/threonine-protein kinase SNK) (hSNK) (Serum-inducible kinase)	PLK2 SNK	Homo sapiens (Human)	685
Q9NZJ5	reviewed	E2AK3_HUMAN	Eukaryotic translation initiation factor 2-alpha kinase 3 (EC 2.7.11.1) (PRKR-like endoplasmic reticulum kinase) (Pancreatic eIF2-alpha kinase) (HsPEK) (Protein tyrosine kinase EIF2AK3) (EC 2.7.10.2)	EIF2AK3 PEK PERK	Homo sapiens (Human)	1116
Q9P0L2	reviewed	MARK1_HUMAN	Serine/threonine-protein kinase MARK1 (EC 2.7.11.1) (EC 2.7.11.26) (MAP/microtubule affinity-regulating kinase 1) (PAR1 homolog c) (Par-1c) (Par1c)	MARK1 KIAA1477 MARK	Homo sapiens (Human)	795
Q9P1W9	reviewed	PIM2_HUMAN	Serine/threonine-protein kinase pim-2 (EC 2.7.11.1) (Pim-2h)	PIM2	Homo sapiens (Human)	311
Q9P286	reviewed	PAK5_HUMAN	Serine/threonine-protein kinase PAK 5 (EC 2.7.11.1) (p21-activated kinase 5) (PAK-5) (p21-activated kinase 7) (PAK-7)	PAK5 KIAA1264 PAK7	Homo sapiens (Human)	719
Q9P289	reviewed	STK26_HUMAN	Serine/threonine-protein kinase 26 (EC 2.7.11.1) (MST3 and SOK1-related kinase) (Mammalian STE20-like protein kinase 4) (MST-4) (STE20-like kinase MST4) (Serine/threonine-protein kinase MASK)	STK26 MASK MST4	Homo sapiens (Human)	416
Q9P2K8	reviewed	E2AK4_HUMAN	eIF-2-alpha kinase GCN2 (EC 2.7.11.1) (Eukaryotic translation initiation factor 2-alpha kinase 4) (GCN2-like protein)	EIF2AK4 GCN2 KIAA1338	Homo sapiens (Human)	1649
Q9UBE8	reviewed	NLK_HUMAN	Serine/threonine-protein kinase NLK (EC 2.7.11.24) (Nemo-like kinase) (Protein LAK1)	NLK LAK1	Homo sapiens (Human)	527
Q9UBF8	reviewed	PI4KB_HUMAN	Phosphatidylinositol 4-kinase beta (PI4K-beta) (PI4Kbeta) (PtdIns 4-kinase beta) (EC 2.7.1.67) (NPIK) (PI4K92) (PI4KIII)	PI4KB PIK4CB	Homo sapiens (Human)	816
Q9UBS0	reviewed	KS6B2_HUMAN	Ribosomal protein S6 kinase beta-2 (S6K-beta-2) (S6K2) (EC 2.7.11.1) (70 kDa ribosomal protein S6 kinase 2) (P70S6K2) (p70-S6K 2) (S6 kinase-related kinase) (SRK) (Serine/threonine-protein kinase 14B) (p70 ribosomal S6 kinase beta) (S6K-beta) (p70 S6 kinase beta) (p70 S6K-beta) (p70 S6KB) (p70-beta)	RPS6KB2 STK14B	Homo sapiens (Human)	482
Q9UEE5	reviewed	ST17A_HUMAN	Serine/threonine-protein kinase 17A (EC 2.7.11.1) (DAP kinase-related apoptosis-inducing protein kinase 1)	STK17A DRAK1	Homo sapiens (Human)	414
Q9UEW8	reviewed	STK39_HUMAN	STE20/SPS1-related proline-alanine-rich protein kinase (Ste-20-related kinase) (EC 2.7.11.1) (DCHT) (Serine/threonine-protein kinase 39)	STK39 PASK SPAK	Homo sapiens (Human)	545
Q9UF33	reviewed	EPHA6_HUMAN	Ephrin type-A receptor 6 (EC 2.7.10.1) (EPH homology kinase 2) (EHK-2) (EPH-like kinase 12) (EK12)	EPHA6 EHK2 HEK12	Homo sapiens (Human)	1036
Q9UHD2	reviewed	TBK1_HUMAN	Serine/threonine-protein kinase TBK1 (EC 2.7.11.1) (NF-kappa-B-activating kinase) (T2K) (TANK-binding kinase 1)	TBK1 NAK	Homo sapiens (Human)	729
Q9UHH9	reviewed	IP6K2_HUMAN	Inositol hexakisphosphate kinase 2 (InsP6 kinase 2) (InsP6K2) (EC 2.7.4.-) (P(i)-uptake stimulator) (PiUS)	IP6K2 IHPK2 TCCCIA00113	Homo sapiens (Human)	426
Q9UHJ6	reviewed	SHPK_HUMAN	Sedoheptulokinase (SHK) (EC 2.7.1.14) (Carbohydrate kinase-like protein)	SHPK CARKL	Homo sapiens (Human)	478
Q9UIG0	reviewed	BAZ1B_HUMAN	Tyrosine-protein kinase BAZ1B (EC 2.7.10.2) (Bromodomain adjacent to zinc finger domain protein 1B) (Williams syndrome transcription factor) (Williams-Beuren syndrome chromosomal region 10 protein) (Williams-Beuren syndrome chromosomal region 9 protein) (hWALp2)	BAZ1B WBSC10 WBSCR10 WBSCR9 WSTF	Homo sapiens (Human)	1483
Q9UIJ7	reviewed	KAD3_HUMAN	GTP:AMP phosphotransferase AK3, mitochondrial (EC 2.7.4.10) (Adenylate kinase 3) (Adenylate kinase 3 alpha-like 1) (Adenylate kinase isozyme 3)	AK3 AK3L1 AK6 AKL3L	Homo sapiens (Human)	227
Q9UIK4	reviewed	DAPK2_HUMAN	Death-associated protein kinase 2 (DAP kinase 2) (EC 2.7.11.1) (DAP-kinase-related protein 1) (DRP-1)	DAPK2	Homo sapiens (Human)	370
Q9UJ70	reviewed	NAGK_HUMAN	N-acetyl-D-glucosamine kinase (N-acetylglucosamine kinase) (EC 2.7.1.59) (GlcNAc kinase) (Muramyl dipeptide kinase) (EC 2.7.1.-) (N-acetyl-D-mannosamine kinase) (EC 2.7.1.60)	NAGK	Homo sapiens (Human)	344
Q9UK32	reviewed	KS6A6_HUMAN	Ribosomal protein S6 kinase alpha-6 (S6K-alpha-6) (EC 2.7.11.1) (90 kDa ribosomal protein S6 kinase 6) (p90-RSK 6) (p90RSK6) (Ribosomal S6 kinase 4) (RSK-4) (pp90RSK4)	RPS6KA6 RSK4	Homo sapiens (Human)	745
Q9UKE5	reviewed	TNIK_HUMAN	TRAF2 and NCK-interacting protein kinase (EC 2.7.11.1)	TNIK KIAA0551	Homo sapiens (Human)	1360
Q9UKI8	reviewed	TLK1_HUMAN	Serine/threonine-protein kinase tousled-like 1 (EC 2.7.11.1) (PKU-beta) (Tousled-like kinase 1)	TLK1 KIAA0137	Homo sapiens (Human)	766
Q9UL54	reviewed	TAOK2_HUMAN	Serine/threonine-protein kinase TAO2 (EC 2.7.11.1) (Kinase from chicken homolog C) (hKFC-C) (Prostate-derived sterile 20-like kinase 1) (PSK-1) (PSK1) (Prostate-derived STE20-like kinase 1) (Thousand and one amino acid protein kinase 2)	TAOK2 KIAA0881 MAP3K17 PSK PSK1 UNQ2971/PRO7431	Homo sapiens (Human)	1235
Q9UM73	reviewed	ALK_HUMAN	ALK tyrosine kinase receptor (EC 2.7.10.1) (Anaplastic lymphoma kinase) (CD antigen CD246)	ALK	Homo sapiens (Human)	1620
Q9UPE1	reviewed	SRPK3_HUMAN	SRSF protein kinase 3 (EC 2.7.11.1) (Muscle-specific serine kinase 1) (MSSK-1) (Serine/arginine-rich protein-specific kinase 3) (SR-protein-specific kinase 3) (Serine/threonine-protein kinase 23)	SRPK3 MSSK1 STK23	Homo sapiens (Human)	567
Q9UPQ8	reviewed	DOLK_HUMAN	Dolichol kinase (EC 2.7.1.108) (Transmembrane protein 15)	DOLK KIAA1094 TMEM15 UNQ2422/PRO4980	Homo sapiens (Human)	538
Q9UPZ9	reviewed	CILK1_HUMAN	Serine/threonine-protein kinase ICK (EC 2.7.11.1) (Ciliogenesis associated kinase 1) (Intestinal cell kinase) (hICK) (Laryngeal cancer kinase 2) (LCK2) (MAK-related kinase) (MRK)	CILK1 ICK KIAA0936	Homo sapiens (Human)	632
Q9UQ07	reviewed	MOK_HUMAN	MAPK/MAK/MRK overlapping kinase (EC 2.7.11.22) (MOK protein kinase) (Renal tumor antigen 1) (RAGE-1)	MOK RAGE RAGE1	Homo sapiens (Human)	419
Q9UQ88	reviewed	CD11A_HUMAN	Cyclin-dependent kinase 11A (EC 2.7.11.22) (Cell division cycle 2-like protein kinase 2) (Cell division protein kinase 11A) (Galactosyltransferase-associated protein kinase p58/GTA) (PITSLRE serine/threonine-protein kinase CDC2L2)	CDK11A CDC2L2 CDC2L3 PITSLREB	Homo sapiens (Human)	783
Q9UQB9	reviewed	AURKC_HUMAN	Aurora kinase C (EC 2.7.11.1) (Aurora 3) (Aurora/IPL1-related kinase 3) (ARK-3) (Aurora-related kinase 3) (Aurora/IPL1/Eg2 protein 2) (Serine/threonine-protein kinase 13) (Serine/threonine-protein kinase aurora-C)	AURKC AIE2 AIK3 AIRK3 ARK3 STK13	Homo sapiens (Human)	309
Q9UQM7	reviewed	KCC2A_HUMAN	Calcium/calmodulin-dependent protein kinase type II subunit alpha (CaM kinase II subunit alpha) (CaMK-II subunit alpha) (EC 2.7.11.17)	CAMK2A CAMKA KIAA0968	Homo sapiens (Human)	478
Q9Y223	reviewed	GLCNE_HUMAN	Bifunctional UDP-N-acetylglucosamine 2-epimerase/N-acetylmannosamine kinase (UDP-GlcNAc-2-epimerase/ManAc kinase) [Includes: UDP-N-acetylglucosamine 2-epimerase (hydrolyzing) (EC 3.2.1.183) (UDP-GlcNAc-2-epimerase) (Uridine diphosphate-N-acetylglucosamine-2-epimerase); N-acetylmannosamine kinase (EC 2.7.1.60) (ManAc kinase)]	GNE GLCNE IBM2	Homo sapiens (Human)	722
Q9Y243	reviewed	AKT3_HUMAN	RAC-gamma serine/threonine-protein kinase (EC 2.7.11.1) (Protein kinase Akt-3) (Protein kinase B gamma) (PKB gamma) (RAC-PK-gamma) (STK-2)	AKT3 PKBG	Homo sapiens (Human)	479
Q9Y259	reviewed	CHKB_HUMAN	Choline/ethanolamine kinase (Choline kinase beta) (CK) (CKB) (EC 2.7.1.32) (Choline kinase-like protein) (Ethanolamine kinase) (EK) (EC 2.7.1.82) (Ethanolamine kinase beta) (EKB) (choline/ethanolamine kinase beta) (CKEKB)	CHKB CHETK CHKL	Homo sapiens (Human)	395
Q9Y2H1	reviewed	ST38L_HUMAN	Serine/threonine-protein kinase 38-like (EC 2.7.11.1) (NDR2 protein kinase) (Nuclear Dbf2-related kinase 2)	STK38L KIAA0965 NDR2	Homo sapiens (Human)	464
Q9Y2H9	reviewed	MAST1_HUMAN	Microtubule-associated serine/threonine-protein kinase 1 (EC 2.7.11.1) (Syntrophin-associated serine/threonine-protein kinase)	MAST1 KIAA0973 SAST	Homo sapiens (Human)	1570
Q9Y2I7	reviewed	FYV1_HUMAN	1-phosphatidylinositol 3-phosphate 5-kinase (Phosphatidylinositol 3-phosphate 5-kinase) (EC 2.7.1.150) (FYVE finger-containing phosphoinositide kinase) (PIKfyve) (Phosphatidylinositol 3-phosphate 5-kinase type III) (PIPkin-III) (Type III PIP kinase) (Serine-protein kinase PIKFYVE) (EC 2.7.11.1)	PIKFYVE KIAA0981 PIP5K3	Homo sapiens (Human)	2098
Q9Y2K2	reviewed	SIK3_HUMAN	Serine/threonine-protein kinase SIK3 (EC 2.7.11.1) (Salt-inducible kinase 3) (SIK-3) (Serine/threonine-protein kinase QSK)	SIK3 KIAA0999 QSK L19	Homo sapiens (Human)	1321
Q9Y2U5	reviewed	M3K2_HUMAN	Mitogen-activated protein kinase kinase kinase 2 (EC 2.7.11.25) (MAPK/ERK kinase kinase 2) (MEK kinase 2) (MEKK 2)	MAP3K2 MAPKKK2 MEKK2	Homo sapiens (Human)	619
Q9Y3D8	reviewed	KAD6_HUMAN	Adenylate kinase isoenzyme 6 (AK6) (EC 2.7.4.3) (Adrenal gland protein AD-004) (Coilin-interacting nuclear ATPase protein) (hCINAP) (Dual activity adenylate kinase/ATPase) (AK/ATPase)	AK6 CINAP AD-004 CGI-137	Homo sapiens (Human)	172
Q9Y3S1	reviewed	WNK2_HUMAN	Serine/threonine-protein kinase WNK2 (EC 2.7.11.1) (Antigen NY-CO-43) (Protein kinase lysine-deficient 2) (Protein kinase with no lysine 2) (Serologically defined colon cancer antigen 43)	WNK2 KIAA1760 PRKWNK2 SDCCAG43 P/OKcl.13	Homo sapiens (Human)	2297
Q9Y463	reviewed	DYR1B_HUMAN	Dual specificity tyrosine-phosphorylation-regulated kinase 1B (EC 2.7.12.1) (Minibrain-related kinase) (Mirk protein kinase)	DYRK1B MIRK	Homo sapiens (Human)	629
Q9Y4B6	reviewed	DCAF1_HUMAN	DDB1- and CUL4-associated factor 1 (HIV-1 Vpr-binding protein) (VprBP) (Serine/threonine-protein kinase VPRBP) (EC 2.7.11.1) (Vpr-interacting protein)	DCAF1 KIAA0800 RIP VPRBP	Homo sapiens (Human)	1507
Q9Y4K4	reviewed	M4K5_HUMAN	Mitogen-activated protein kinase kinase kinase kinase 5 (EC 2.7.11.1) (Kinase homologous to SPS1/STE20) (KHS) (MAPK/ERK kinase kinase kinase 5) (MEK kinase kinase 5) (MEKKK 5)	MAP4K5	Homo sapiens (Human)	846
Q9Y572	reviewed	RIPK3_HUMAN	Receptor-interacting serine/threonine-protein kinase 3 (EC 2.7.11.1) (RIP-like protein kinase 3) (Receptor-interacting protein 3) (RIP-3)	RIPK3 RIP3	Homo sapiens (Human)	518
Q9Y5B8	reviewed	NDK7_HUMAN	Nucleoside diphosphate kinase homolog 7 (NDK 7) (NDP kinase homolog 7) (3'-5' exonuclease NME7) (EC 3.1.-.-) (Protein kinase NME7) (EC 2.7.-.-) (nm23-H7)	NME7	Homo sapiens (Human)	376
Q9Y5S2	reviewed	MRCKB_HUMAN	Serine/threonine-protein kinase MRCK beta (EC 2.7.11.1) (CDC42-binding protein kinase beta) (CDC42BP-beta) (DMPK-like beta) (Myotonic dystrophy kinase-related CDC42-binding kinase beta) (MRCK beta) (Myotonic dystrophy protein kinase-like beta)	CDC42BPB KIAA1124	Homo sapiens (Human)	1711
Q9Y6E0	reviewed	STK24_HUMAN	Serine/threonine-protein kinase 24 (EC 2.7.11.1) (Mammalian STE20-like protein kinase 3) (MST-3) (STE20-like kinase MST3) [Cleaved into: Serine/threonine-protein kinase 24 36 kDa subunit (Mammalian STE20-like protein kinase 3 N-terminal) (MST3/N); Serine/threonine-protein kinase 24 12 kDa subunit (Mammalian STE20-like protein kinase 3 C-terminal) (MST3/C)]	STK24 MST3 STK3	Homo sapiens (Human)	443
Q9Y6K8	reviewed	KAD5_HUMAN	Adenylate kinase isoenzyme 5 (AK 5) (EC 2.7.4.3) (EC 2.7.4.6) (ATP-AMP transphosphorylase 5)	AK5	Homo sapiens (Human)	562
Q9Y6M4	reviewed	KC1G3_HUMAN	Casein kinase I isoform gamma-3 (CKI-gamma 3) (EC 2.7.11.1)	CSNK1G3	Homo sapiens (Human)	447
Q9Y6R4	reviewed	M3K4_HUMAN	Mitogen-activated protein kinase kinase kinase 4 (EC 2.7.11.25) (MAP three kinase 1) (MAPK/ERK kinase kinase 4) (MEK kinase 4) (MEKK 4)	MAP3K4 KIAA0213 MAPKKK4 MEKK4 MTK1	Homo sapiens (Human)	1608
Q9Y6S9	reviewed	RPKL1_HUMAN	Ribosomal protein S6 kinase-like 1 (EC 2.7.11.1)	RPS6KL1	Homo sapiens (Human)	549
Q9Y6T7	reviewed	DGKB_HUMAN	Diacylglycerol kinase beta (DAG kinase beta) (EC 2.7.1.107) (90 kDa diacylglycerol kinase) (Diglyceride kinase beta) (DGK-beta)	DGKB DAGK2 KIAA0718	Homo sapiens (Human)	804
O60361	reviewed	NDK8_HUMAN	Putative nucleoside diphosphate kinase (NDK) (NDP kinase) (EC 2.7.4.6)	NME2P1	Homo sapiens (Human)	137
Q14409	reviewed	GLPK3_HUMAN	Glycerol kinase 3 (GK 3) (Glycerokinase 3) (EC 2.7.1.30) (ATP:glycerol 3-phosphotransferase 3) (Glycerol kinase 3 pseudogene) (Glycerol kinase, testis specific 1)	GK3 GK3P GKP3 GKTB	Homo sapiens (Human)	553
Q5MAI5	reviewed	CDKL4_HUMAN	Cyclin-dependent kinase-like 4 (EC 2.7.11.22)	CDKL4	Homo sapiens (Human)	379
Q6ZS86	reviewed	GLPK5_HUMAN	Glycerol kinase 5 (GK 5) (Glycerokinase 5) (EC 2.7.1.30) (ATP:glycerol 3-phosphotransferase 5)	GK5	Homo sapiens (Human)	529
Q96M69	reviewed	LRGUK_HUMAN	Leucine-rich repeat and guanylate kinase domain-containing protein	LRGUK	Homo sapiens (Human)	825
Q9HA64	reviewed	KT3K_HUMAN	Ketosamine-3-kinase (EC 2.7.1.172) (Fructosamine-3-kinase-related protein) (FN3K-RP) (FN3K-related protein) (Protein-psicosamine 3-kinase FN3KRP) (EC 2.7.1.-)	FN3KRP	Homo sapiens (Human)	309
A4QPH2	reviewed	PI4P2_HUMAN	Putative phosphatidylinositol 4-kinase alpha-like protein P2	PI4KAP2	Homo sapiens (Human)	592
Q3MIX3	reviewed	ADCK5_HUMAN	Uncharacterized aarF domain-containing protein kinase 5 (EC 2.7.11.-)	ADCK5	Homo sapiens (Human)	580
Q5T6J7	reviewed	GNTK_HUMAN	Probable gluconokinase (EC 2.7.1.12) (Gluconate kinase)	IDNK C9orf103	Homo sapiens (Human)	187
Q8IV42	reviewed	PSTK_HUMAN	L-seryl-tRNA(Sec) kinase (EC 2.7.1.164) (O-phosphoseryl-tRNA(Sec) kinase)	PSTK C10orf89	Homo sapiens (Human)	348
Q13670	reviewed	PM2PB_HUMAN	Putative postmeiotic segregation increased 2-like protein 11 (PMS2-related protein 6) (Putative postmeiotic segregation increased 2 pseudogene 11)	PMS2P11 PMS2L11 PMSR6	Homo sapiens (Human)	270
