# Supplementary material for: A Two-Dimensional Peptide-Centric Stability Assay Maps Multidimensional Target Landscapes Unveiling 17β-Estradiol (E2)-GPX4 Binding-Induced Ferroptosis
Source: Research Square preprint supplement (doi:10.21203/rs.3.rs-6893001/v1), 2025-07-04
Supplement: Supplementary file 6 [file 4e1d79ae58950b89321b34a6.xlsx]

## Sheet: Sheet1
Supplementary table 3
This file summarizes protein-level bayes t-test result to 20uM staurosporine (STU) in K562 cell lysates
Contrast	Sequences	Log2FC	-Log10P.Value	Gene.names	Protein names	Uniprot entry	Positions	Log2 transformed quantity _DMSO				Log2 transformed quantity _20uM Staurosporine				IsKinase
								DMSO_Rep.1	DMSO_Rep.2	DMSO_Rep.3	DMSO_Rep.4	Staurosporine_Rep1	Staurosporine_Rep2	Staurosporine_Rep3	Staurosporine_Rep4	KinHub	Uniprot
20 uM Staurosporine vs. DMSO	LYEAVPQLSNVFK	-1.71964	1.05241	CDC7	Cell division cycle 7-related protein kinase	O00311	47	12.5201	9.02017	12.9892	12.9248	10.5429	10.4409	9.25294	10.3389	YES	YES
20 uM Staurosporine vs. DMSO	VNWLAHNVSK	1.44281	1.84623	PIK3CD	Phosphatidylinositol 4,5-bisphosphate 3-kinase catalytic subunit delta isoform	O00329	1031	12.6076	12.3043	11.3585	10.5498	12.6426	13.3467	13.5001	13.1021	NO	YES
20 uM Staurosporine vs. DMSO	LEGVDGGQSPR	2.19084	2.02979	EEF2K	Eukaryotic elongation factor 2 kinase	O00418	10	11.8249	10.8329	13.6654	10.4615	13.5948	13.6125	14.1865	14.1543	YES	YES
20 uM Staurosporine vs. DMSO	HPVEELLDSYHNQVELALQIENQHR	-1.54907	1.31064	PIK3C2A	Phosphatidylinositol 4-phosphate 3-kinase C2 domain-containing subunit alpha	O00443	548	12.3712	10.9598	12.0325	11.8956	12.0283	10.2925	8.828	9.91398	NO	YES
20 uM Staurosporine vs. DMSO	DLTLSNLLLTR	-1.98383	2.34724	PLK4	Serine/threonine-protein kinase PLK4	O00444	136	10.639	11.7039	11.779	11.1857	9.99729	8.26043	10.1003	9.0143	YES	YES
20 uM Staurosporine vs. DMSO	AANVLLSEQGDVK	-0.801275	6.9812	STK25	Serine/threonine-protein kinase 25	O00506	143	17.9204	17.9504	17.9465	18.0321	17.1953	17.1246	17.1304	17.194	YES	YES
20 uM Staurosporine vs. DMSO	LLFPSSHLPSFPSR	-0.861314	0.840805	PIK3C2B	Phosphatidylinositol 4-phosphate 3-kinase C2 domain-containing subunit beta	O00750	1418	11.1711	11.5618	11.187	10.5857	9.07938	9.76304	11.2241	10.9938	NO	YES
20 uM Staurosporine vs. DMSO	LNNMNKYDYVLTGYTR	-0.840007	0.48106	PDXK	Pyridoxal kinase	O00764	71	10.5824	10.4804	7.0908	10.3784	8.12685	9.11555	8.67376	9.2557	NO	YES
20 uM Staurosporine vs. DMSO	SPFAEGTSAR	-1.9582	2.95313	CIT	Citron Rho-interacting kinase	O14578	301	11.7545	11.4706	11.3695	11.0955	9.04164	9.14363	10.4264	9.24562	YES	YES
20 uM Staurosporine vs. DMSO	LNSEEMK	-0.539956	0.667881	RIOK3	Serine/threonine-protein kinase RIO3	O14730	377	10.1712	10.2732	9.78889	10.3752	10.0221	9.06693	10.2739	9.08588	YES	YES
20 uM Staurosporine vs. DMSO	HMLGLPSTLFTPR	0.152894	1.04848	MAP2K7	Dual specificity mitogen-activated protein kinase kinase 7	O14733	73	15.3968	15.577	15.5205	15.2977	15.5674	15.6032	15.6277	15.6052	YES	YES
20 uM Staurosporine vs. DMSO	KIDSAPLALLHK	-3.23787	5.95746	CHEK1	Serine/threonine-protein kinase Chk1	O14757	233	14.6923	14.7746	14.2676	14.903	11.8641	11.473	10.8701	11.4788	YES	YES
20 uM Staurosporine vs. DMSO	LTPTMMLYAGR	0.300322	0.429281	BCKDK	Branched-chain alpha-ketoacid dehydrogenase kinase	O14874	70	13.4987	13.2613	13.2286	12.1406	13.7184	12.9953	13.3152	13.3015	YES	YES
20 uM Staurosporine vs. DMSO	ITYETQISPRPQPESVSCILQEPK	-1.16839	2.25392	IKBKB	Inhibitor of nuclear factor kappa-B kinase subunit beta	O14920	395	12.8805	12.4281	12.5527	12.9994	11.2508	11.5175	12.2853	11.1334	YES	YES
20 uM Staurosporine vs. DMSO	ISRVEFTFPDFVTEGAR	-1.53263	4.67242	AURKA	Aurora kinase A	O14965	341	13.9778	14.126	14.1641	13.6598	12.5531	12.2383	12.4246	12.5813	YES	YES
20 uM Staurosporine vs. DMSO	IFYQTCR	-2.34517	5.7154	GAK	Cyclin-G-associated kinase	O14976	151	14.9272	14.9397	14.9563	14.7803	12.8451	12.553	12.8029	12.022	YES	YES
20 uM Staurosporine vs. DMSO	RCNSIAALKATSQEIVSSISQEWK	-1.32449	0.315575	PIP5K1B	Phosphatidylinositol 4-phosphate 5-kinase type-1 beta	O14986	410	15.3048	15.0899	15.0508	8.8818	14.4786	9.89294	14.8668	9.79095	NO	YES
20 uM Staurosporine vs. DMSO	GAERPAAGVGKGFPEAR	0.911645	1.26059	MAST4	Microtubule-associated serine/threonine-protein kinase 4	O15021	2402	9.20149	9.30348	10.5934	9.40547	10.5663	10.6683	10.1456	10.7703	YES	YES
20 uM Staurosporine vs. DMSO	CIFACEEMSGEVR	0.339145	1.34975	CHUK	Inhibitor of nuclear factor kappa-B kinase subunit alpha	O15111	241	14.0001	14.2314	14.2774	13.9612	14.6948	14.4986	14.4567	14.1765	YES	YES
20 uM Staurosporine vs. DMSO	ILGEGSFSTVVLAR	-1.89279	7.318	PDPK1	3-phosphoinositide-dependent protein kinase 1	O15530	87	15.1543	15.291	15.3507	15.3562	13.2821	13.3977	13.4267	13.4745	YES	YES
20 uM Staurosporine vs. DMSO	GCTVWLTGLSGAGK	0.335691	2.6562	PAPSS1	Bifunctional 3'-phosphoadenosine 5'-phosphosulfate synthase 1	O43252	52	16.6186	16.757	16.7865	16.6186	17.152	17.0645	16.8683	17.0386	NO	YES
20 uM Staurosporine vs. DMSO	FVQDLVR	0.143736	0.532378	DAPK3	Death-associated protein kinase 3	O43293	433	14.6413	14.3912	14.6695	14.9885	14.7974	14.8102	14.8313	14.8267	YES	YES
20 uM Staurosporine vs. DMSO	KTAEISSTALR	0.314454	1.67571	PPIP5K2	Inositol hexakisphosphate and diphosphoinositol-pentakisphosphate kinase 2	O43314	1160	14.4146	14.524	14.7936	14.67	14.8437	14.8838	14.8688	15.0637	NO	YES
20 uM Staurosporine vs. DMSO	DLKPPNLLLVAGGTVLK	-4.37197	7.47578	MAP3K7	Mitogen-activated protein kinase kinase kinase 7	O43318	156	14.8066	14.739	14.8277	14.8367	10.6663	9.96087	10.7116	10.3834	YES	YES
20 uM Staurosporine vs. DMSO	IADFGLSK	-0.939862	2.89525	RIPK2	Receptor-interacting serine/threonine-protein kinase 2	O43353	162	16.2605	16.3267	16.076	16.7072	14.9673	15.5735	15.2937	15.7765	YES	YES
20 uM Staurosporine vs. DMSO	LIVLLLECKR	-2.92568	4.27439	BUB1	Mitotic checkpoint serine/threonine-protein kinase BUB1	O43683	1073	12.2843	12.0718	12.0704	11.7209	9.31059	8.47431	8.78688	9.87287	YES	YES
20 uM Staurosporine vs. DMSO	LYFAETVLALEYLHNYGIVHR	-1.07166	1.08391	MAST3	Microtubule-associated serine/threonine-protein kinase 3	O60307	469	11.1735	10.7114	10.8533	9.73514	10.0152	10.1265	9.83499	8.20991	YES	YES
20 uM Staurosporine vs. DMSO	IMDYSLLLGVHNIDQHER	0.823751	0.519737	PIP5K1C	Phosphatidylinositol 4-phosphate 5-kinase type-1 gamma	O60331	314	9.03681	9.40931	11.3553	11.5033	11.1651	9.69619	11.9348	11.8037	NO	YES
20 uM Staurosporine vs. DMSO	AKENELQAGPWNTGR	-0.817469	2.54571	BUB1B	Mitotic checkpoint serine/threonine-protein kinase BUB1 beta	O60566	303	14.2904	14.0428	13.9369	13.9256	12.9984	12.9137	13.3957	13.6181	YES	YES
20 uM Staurosporine vs. DMSO	NILVENENR	-1.32444	2.79957	JAK2	Tyrosine-protein kinase JAK2	O60674	981	14.1032	13.0954	14.1361	14.1185	12.4315	12.9412	12.5486	12.2342	YES	YES
20 uM Staurosporine vs. DMSO	VFFVESVCDDPDVIAANILEVK	-1.81736	2.53561	PFKFB2	6-phosphofructo-2-kinase/fructose-2,6-bisphosphatase 2	O60825	151	12.1134	11.8152	11.2389	12.3836	10.6782	9.10122	10.3389	10.1635	NO	YES
20 uM Staurosporine vs. DMSO	LEGWLSLPVR	0.202773	1.50628	ROCK2	Rho-associated protein kinase 2	O75116	1153	16.8526	17.0082	17.1146	16.9423	17.2279	17.2739	17.025	17.202	YES	YES
20 uM Staurosporine vs. DMSO	TLVPTIPR	-0.862444	2.08416	ULK1	Serine/threonine-protein kinase ULK1	O75385	238	13.3527	13.6706	13.9326	13.9604	12.8979	12.2747	13.1117	13.1823	YES	YES
20 uM Staurosporine vs. DMSO	DLKPENLLFTDENDNLEIK	1.38456	0.766655	RPS6KA5	Ribosomal protein S6 kinase alpha-5	O75582	544	8.88218	8.98417	6.06036	10.845	10.247	10.349	9.26299	10.451	YES	YES
20 uM Staurosporine vs. DMSO	KASLDTSELER	1.83129	0.897547	TRIO	Triple functional domain protein	O75962	2120	9.80329	9.38482	4.76244	9.1197	10.389	9.57213	10.7601	9.67412	YES	YES
20 uM Staurosporine vs. DMSO	IVDFGMSR	-3.05291	3.49151	STK17B	Serine/threonine-protein kinase 17B	O94768	177	13.536	13.0453	14.101	13.8048	9.76353	9.66154	11.7422	11.1081	YES	YES
20 uM Staurosporine vs. DMSO	ALDESHNQNLK	0.990664	1.46317	STK10	Serine/threonine-protein kinase 10	O94804	901	13.1991	13.225	13.5497	11.6774	13.6578	14.0865	13.777	14.0926	YES	YES
20 uM Staurosporine vs. DMSO	ELSPDAAAYCCSACHGDETWSYNHPIR	0.78236	1.14826	NADK	NAD kinase	O95544	13	9.532	10.6802	9.67407	9.3237	10.6811	10.6898	10.4314	10.5371	NO	YES
20 uM Staurosporine vs. DMSO	EVLEGLEYLHK	-0.419791	3.97003	OXSR1	Serine/threonine-protein kinase OSR1	O95747	129	16.9728	16.9925	17.1005	17.1748	16.6372	16.6799	16.6023	16.6422	YES	YES
20 uM Staurosporine vs. DMSO	GQNVLLTENAEVK	-0.156142	1.9938	MAP4K4	Mitogen-activated protein kinase kinase kinase kinase 4	O95819	156	17.0027	17.0186	17.0202	16.9465	16.8821	16.7988	16.8412	16.8414	YES	YES
20 uM Staurosporine vs. DMSO	DILAEADNEWVVR	-4.42229	6.04882	LATS1	Serine/threonine-protein kinase LATS1	O95835	755	13.4761	12.9694	12.5381	13.1744	8.5443	9.13636	8.43577	8.35247	YES	YES
20 uM Staurosporine vs. DMSO	AALQLVVDPGDPR	-1.93834	7.01169	PAK4	Serine/threonine-protein kinase PAK 4	O96013	306	16.0576	16.1741	16.2229	16.3149	14.0288	14.2789	14.2239	14.4846	YES	YES
20 uM Staurosporine vs. DMSO	TLCGTPTYLAPEVLVSVGTAGYNR	-1.57479	2.30592	CHEK2	Serine/threonine-protein kinase Chk2	O96017	383	10.7215	10.0527	11.3864	10.2472	9.44723	8.98434	9.16348	8.51358	YES	YES
20 uM Staurosporine vs. DMSO	NCLVGENHLVK	-1.87669	4.12043	ABL1	Tyrosine-protein kinase ABL1	P00519	368	13.4378	13.1212	12.9423	13.3531	11.2946	11.458	10.8643	11.7308	YES	YES
20 uM Staurosporine vs. DMSO	DCVGPEVEK	0.323577	1.43766	PGK1	Phosphoglycerate kinase 1	P00558	98	15.7763	15.7574	15.4707	15.3511	16.1048	15.7038	15.998	15.8432	NO	YES
20 uM Staurosporine vs. DMSO	VNAEGSVDSVFSQVCTHLDALK	-0.226744	1.42928	AK1	Adenylate kinase isoenzyme 1	P00568	173	15.666	15.4953	15.4957	15.5596	15.3204	15.4971	15.341	15.1511	NO	YES
20 uM Staurosporine vs. DMSO	GKWHGDVAVK	-2.22459	1.02194	RAF1	RAF proto-oncogene serine/threonine-protein kinase	P04049	366	11.4769	12.2156	11.3287	11.8019	10.8514	9.43304	11.8549	5.78549	YES	YES
20 uM Staurosporine vs. DMSO	GQIQVILGPMFSGK	0.428759	1.22897	TK1	Thymidine kinase, cytosolic	P04183	19	12.7698	13.2094	12.7769	12.909	13.7313	13.2222	13.2402	13.1865	NO	YES
20 uM Staurosporine vs. DMSO	ANKEILDEAYVMAGVGSPYVSR	-0.204033	0.288912	ERBB2	Receptor tyrosine-protein kinase erbB-2	P04626	763	15.1491	13.7825	14.3099	14.8537	13.9615	14.2597	14.6693	14.3887	YES	YES
20 uM Staurosporine vs. DMSO	LTDFNFLMVLGK	-2.95833	8.77227	PRKCB	Protein kinase C beta type	P05771	339	17.3423	17.4767	17.4688	17.5779	14.6567	14.538	14.2395	14.5982	YES	YES
20 uM Staurosporine vs. DMSO	WTAPEAINYGTFTIKSDVWSFGILLTEIVTHGR	0.545794	0.456797	LCK	Tyrosine-protein kinase Lck	P06239	406	9.63202	9.53003	10.514	9.42804	10.1828	10.2847	9.19875	11.6211	YES	YES
20 uM Staurosporine vs. DMSO	HPNIVSLQDVLMQDSR	-0.712647	3.57984	CDK1	Cyclin-dependent kinase 1	P06493	60	15.6986	15.6371	15.6625	15.556	15.2576	14.7714	14.8335	14.8411	YES	YES
20 uM Staurosporine vs. DMSO	GSLLDFLK	0.472104	1.47431	LYN	Tyrosine-protein kinase Lyn	P07948	325	13.1273	13.0111	13.3869	13.0117	13.8219	13.7329	13.6554	13.2152	YES	YES
20 uM Staurosporine vs. DMSO	ALVFQPVAELKDQTDFEHRIPK	-0.730246	1.78376	PFKM	ATP-dependent 6-phosphofructokinase, muscle type	P08237	717	13.537	13.2283	13.0036	13.2487	11.9534	12.5865	12.8264	12.7303	NO	YES
20 uM Staurosporine vs. DMSO	GRWHGDVAVK	1.49062	1.04608	ARAF	Serine/threonine-protein kinase A-Raf	P10398	327	9.83784	13.0067	12.8468	10.0418	13.1975	13.1959	12.7032	12.5991	YES	YES
20 uM Staurosporine vs. DMSO	MIYLQTLLAK	0.192498	1.23419	BCR	Breakpoint cluster region protein	P11274	56	14.6701	14.7137	14.7814	14.5946	14.9999	14.8454	14.8006	14.8839	YES	YES
20 uM Staurosporine vs. DMSO	SFFWQVLEAVR	-2.53882	5.18289	PIM1	Serine/threonine-protein kinase pim-1	P11309	146	13.2849	13.2431	13.5405	12.9468	10.4591	11.0862	10.5985	10.7162	YES	YES
20 uM Staurosporine vs. DMSO	LMDVCATSR	0.162589	0.986294	CDK4	Cyclin-dependent kinase 4	P11802	74	15.938	15.7554	15.8328	15.552	15.9668	15.8984	15.9119	15.9513	YES	YES
20 uM Staurosporine vs. DMSO	VTSIADRLNVEFALIHKER	-0.838673	1.68529	PRPS2	Ribose-phosphate pyrophosphokinase 2	P11908	178	13.8399	14.7581	14.3118	14.9202	12.9939	13.8565	13.9317	13.6933	NO	YES
20 uM Staurosporine vs. DMSO	PFSNSHNALK	0.253837	1.21437	CKB	Creatine kinase B-type	P12277	2	17.7535	17.9317	17.9039	18.1335	18.0891	18.3112	17.9415	18.396	NO	YES
20 uM Staurosporine vs. DMSO	MQHLIAR	0.613896	2.01298	PKM	Pyruvate kinase PKM	P14618	377	15.6707	15.4034	16.2692	15.754	16.0993	16.4488	16.5101	16.4947	NO	YES
20 uM Staurosporine vs. DMSO	MLNVTAPTPQQLQAFK	1.90551	1.49706	BRAF	Serine/threonine-protein kinase B-raf	P15056	484	9.00582	12.0797	9.88783	8.80184	11.1173	11.7926	12.6276	11.8597	YES	YES
20 uM Staurosporine vs. DMSO	NIIHGSDSVESAEK	0.228642	0.419797	NME1	Nucleoside diphosphate kinase A	P15531	115	11.5059	11.8156	11.6743	11.4036	11.9366	11.8369	11.4938	12.0467	NO	YES
20 uM Staurosporine vs. DMSO	LTAEQALQHPFFER	-3.06719	6.17088	PHKG2	Phosphorylase b kinase gamma catalytic chain, liver/testis isoform	P15735	280	13.3537	13.4409	13.4184	13.6908	10.2152	10.3171	10.6837	10.4191	YES	YES
20 uM Staurosporine vs. DMSO	GSSIPQFTNSPTMVIMVGLPAR	0.378272	0.848853	PFKFB1	6-phosphofructo-2-kinase/fructose-2,6-bisphosphatase 1	P16118	32	12.2335	12.4749	12.4518	11.7258	12.5683	12.6493	12.4822	12.6994	NO	YES
20 uM Staurosporine vs. DMSO	VMLADRK	-2.15221	7.63526	PRKCA	Protein kinase C alpha type	P17252	353	16.2707	16.3703	16.3392	16.3494	14.0421	14.1979	14.0396	14.4411	YES	YES
20 uM Staurosporine vs. DMSO	ILQAVNFPFLVK	-2.05389	6.03092	PRKACA	cAMP-dependent protein kinase catalytic subunit alpha	P17612	95	14.7536	14.9365	14.9836	14.9014	12.8821	12.9837	12.457	13.0368	YES	YES
20 uM Staurosporine vs. DMSO	IMEVIDAITTTAQSHQR	-0.107523	1.1339	PFKL	ATP-dependent 6-phosphofructokinase, liver type	P17858	185	17.9069	17.9792	17.8026	17.9316	17.8536	17.7767	17.8081	17.7518	NO	YES
20 uM Staurosporine vs. DMSO	IDEAILITWTKR	-1.03945	1.08418	HK1	Hexokinase-1	P19367	163	10.6026	10.7736	9.64102	10.6716	9.93604	8.22267	10.2291	9.14316	NO	YES
20 uM Staurosporine vs. DMSO	IGDFGLVTSLK	-0.90168	5.78414	EIF2AK2	Interferon-induced, double-stranded RNA-activated protein kinase	P19525	430	17.5732	17.7435	17.815	17.8487	16.7866	16.942	16.7693	16.8758	YES	YES
20 uM Staurosporine vs. DMSO	HLVSPEALDLLDKLLR	-2.84554	5.98634	CSNK2A2	Casein kinase II subunit alpha'	P19784	292	14.0978	14.2812	13.8883	14.1256	11.6976	11.2587	11.0835	10.9711	YES	YES
20 uM Staurosporine vs. DMSO	FLTYFPGR	-0.329934	1.71083	CDK11B	Cyclin-dependent kinase 11B	P21127	703	16.2721	16.0313	16.1566	16.0739	15.8597	15.4894	15.9304	15.9346	YES	YES
20 uM Staurosporine vs. DMSO	KAFPSHSESSIR	1.00655	1.36172	TAF1	Transcription initiation factor TFIID subunit 1	P21675	853	9.24735	9.14536	10.1294	9.04337	10.5674	10.6694	9.58342	10.7714	YES	YES
20 uM Staurosporine vs. DMSO	GLVGEIIK	0.343542	1.09788	NME2	Nucleoside diphosphate kinase B	P22392	19	14.204	14.237	14.3815	13.6275	14.5991	14.416	14.3724	14.4367	NO	YES
20 uM Staurosporine vs. DMSO	SLLQVDLTKR	0.0450133	0.0125117	PRKACG	cAMP-dependent protein kinase catalytic subunit gamma	P22612	272	13.925	9.11116	10.4011	9.21314	13.0706	10.3499	9.16196	10.2479	YES	YES
20 uM Staurosporine vs. DMSO	LEYAFKDNSNLYMVMEYVPGGEMFSHLR	-0.693361	0.43065	PRKACB	cAMP-dependent protein kinase catalytic subunit beta	P22694	107	10.3402	10.8497	9.96609	12.4952	11.7389	10.0409	8.95495	10.1429	YES	YES
20 uM Staurosporine vs. DMSO	IRPECFELLR	-1.31949	6.15934	RPS6KB1	Ribosomal protein S6 kinase beta-1	P23443	86	16.1156	16.1189	16.1067	16.062	14.8556	14.8762	14.5127	14.8807	YES	YES
20 uM Staurosporine vs. DMSO	TMVNLPVISPFK	0.335237	1.1734	ITPKA	Inositol-trisphosphate 3-kinase A	P23677	172	12.8219	12.9856	12.7954	13.0409	13.1935	13.2315	13.1167	13.4431	NO	YES
20 uM Staurosporine vs. DMSO	STNFFGFLS	0.725394	0.870892	DGKA	Diacylglycerol kinase alpha	P23743	727	7.82569	8.90369	8.70609	9.02037	8.76001	9.5349	9.07344	9.98904	NO	YES
20 uM Staurosporine vs. DMSO	YENGAFQER	0.167893	1.00667	DTYMK	Thymidylate kinase	P23919	151	16.7754	16.6641	16.5122	16.9401	16.9301	16.9191	16.8521	16.8622	NO	YES
20 uM Staurosporine vs. DMSO	LADFGMCK	-5.39052	6.59908	PRKCH	Protein kinase C eta type	P24723	495	15.1304	15.5912	15.3928	16.0614	9.61871	10.6468	9.60706	10.7412	YES	YES
20 uM Staurosporine vs. DMSO	AALAHPFFQDVTKPVPHLRL	-3.10488	8.72009	CDK2	Cyclin-dependent kinase 2	P24941	279	15.6738	15.5616	15.6034	15.7	12.7007	12.4368	12.4591	12.5226	YES	YES
20 uM Staurosporine vs. DMSO	LGYLLFR	-0.601529	3.80274	GRK2	Beta-adrenergic receptor kinase 1	P25098	63	15.3867	15.5839	15.5731	15.5144	14.9296	15.0469	14.7428	14.9326	YES	YES
20 uM Staurosporine vs. DMSO	VYNLDFNPPHVHGIDDVTGEPLVQQEDDKPEAVAAR	-0.659663	1.13189	AK4	Adenylate kinase 4, mitochondrial	P27144	135	14.7257	14.8578	14.8432	15.1749	13.1864	14.6101	14.6121	14.5543	NO	YES
20 uM Staurosporine vs. DMSO	NYLQSLPSK	0.28315	1.50918	MAPK3	Mitogen-activated protein kinase 3	P27361	279	16.8825	17.0692	17.2455	16.8432	17.0823	17.3932	17.3878	17.3096	YES	YES
20 uM Staurosporine vs. DMSO	FLVLNPIKR	-3.15936	4.68769	MARK3	MAP/microtubule affinity-regulating kinase 3	P27448	287	12.4638	12.6757	12.8073	12.8811	9.77596	9.47709	8.7415	10.1959	YES	YES
20 uM Staurosporine vs. DMSO	SCPSFSASSEGTR	-0.984553	1.92127	DCK	Deoxycytidine kinase	P27707	8	11.8101	12.6654	12.6788	12.4482	11.3844	11.8835	11.0203	11.376	NO	YES
20 uM Staurosporine vs. DMSO	NKVPWNR	0.751092	4.524	MAPK1	Mitogen-activated protein kinase 1	P28482	271	16.3971	16.2924	16.4717	16.2113	17.2063	17.1223	16.8813	17.1669	YES	YES
20 uM Staurosporine vs. DMSO	IGDFGLAK	-1.87156	2.31781	TYK2	Non-receptor tyrosine-protein kinase TYK2	P29597	1039	13.7348	13.3779	12.5754	14.2192	12.5815	11.9807	10.9135	10.9454	YES	YES
20 uM Staurosporine vs. DMSO	FLIDGFPR	0.138598	1.04682	CMPK1	UMP-CMP kinase	P30085	89	21.2551	21.4078	21.4732	21.4545	21.4008	21.6612	21.5413	21.5416	NO	YES
20 uM Staurosporine vs. DMSO	DLLLQVGR	-1.53164	5.41904	WEE1	Wee1-like protein kinase	P30291	405	14.2476	14.218	14.3601	14.4272	13.0128	12.6961	12.772	12.6453	YES	YES
20 uM Staurosporine vs. DMSO	SILIGAPGGPAGYLR	0.0899928	0.908736	PKLR	Pyruvate kinase PKLR	P30613	26	16.864	16.8476	16.9437	16.8259	16.8917	16.9613	16.9723	17.0158	NO	YES
20 uM Staurosporine vs. DMSO	TFCGTPEYLAPEVLEDNDYGR	-1.16298	4.95162	AKT1	RAC-alpha serine/threonine-protein kinase	P31749	308	15.2658	15.4615	15.2276	15.3087	14.0444	14.388	14.2526	13.9266	YES	YES
20 uM Staurosporine vs. DMSO	SLLAGLLK	-1.0405	3.68362	AKT2	RAC-beta serine/threonine-protein kinase	P31751	379	14.1636	14.6826	14.7588	14.4599	13.2487	13.536	13.6213	13.497	YES	YES
20 uM Staurosporine vs. DMSO	MELENIVANSLLLK	0.158657	0.203231	GRK4	G protein-coupled receptor kinase 4	P32298	1	10.6051	10.889	10.8852	11.2827	10.5731	11.4558	11.0767	11.1911	YES	YES
20 uM Staurosporine vs. DMSO	LIDFGIANQMQPDTTSVVK	-1.46279	1.31325	TTK	Dual specificity protein kinase TTK	P33981	662	12.5475	11.301	12.2747	9.81328	9.85179	9.7498	10.8358	9.64781	YES	YES
20 uM Staurosporine vs. DMSO	FYATEIILGLEHMHNR	1.03172	0.630289	GRK3	G protein-coupled receptor kinase 3	P35626	296	6.81366	8.76646	9.83519	7.83136	8.21868	10.9636	8.81747	9.37381	YES	YES
20 uM Staurosporine vs. DMSO	ISELGAGNGGVVTK	-0.478231	4.29395	MAP2K2	Dual specificity mitogen-activated protein kinase kinase 2	P36507	75	18.256	18.1644	18.2654	18.2018	17.8751	17.6359	17.6804	17.7833	YES	YES
20 uM Staurosporine vs. DMSO	GSLVDYLR	-0.529604	3.1391	CSK	Tyrosine-protein kinase CSK	P41240	272	15.5798	15.8101	15.909	15.7937	15.0684	15.3699	15.21	15.3259	YES	YES
20 uM Staurosporine vs. DMSO	ASSSLGLQDFDLLR	-2.05775	4.13736	PRKCI	Protein kinase C iota type	P41743	245	14.4627	14.6795	14.6312	14.7337	11.7886	13.1969	12.5347	12.7559	YES	YES
20 uM Staurosporine vs. DMSO	WNEWLNYDIYIPDLPR	-2.2065	1.50839	PIK3CA	Phosphatidylinositol 4,5-bisphosphate 3-kinase catalytic subunit alpha isoform	P42336	383	13.1742	12.6795	13.2519	12.0296	9.18954	12.8366	11.2975	8.98556	NO	YES
20 uM Staurosporine vs. DMSO	VFGEDSVGVIFK	-0.462923	2.41067	PIK3CB	Phosphatidylinositol 4,5-bisphosphate 3-kinase catalytic subunit beta isoform	P42338	794	15.0293	14.7976	14.7722	14.9843	14.1978	14.5642	14.4736	14.496	NO	YES
20 uM Staurosporine vs. DMSO	AVLALHQDLFSLAQQCIDKAR	-0.917053	1.74202	MTOR	Serine/threonine-protein kinase mTOR	P42345	1548	13.3103	12.977	12.5961	12.6493	11.9482	11.7411	12.6734	11.5018	YES	YES
20 uM Staurosporine vs. DMSO	LDPGAVSDVPEAIK	-1.44073	1.58805	PI4KA	Phosphatidylinositol 4-kinase alpha	P42356	1578	11.3575	12.2113	11.885	11.5207	11.0873	10.9808	8.84475	10.2986	NO	YES
20 uM Staurosporine vs. DMSO	ELGSGLFGVVR	-1.08643	4.28151	TEC	Tyrosine-protein kinase Tec	P42680	375	13.9535	14.2115	14.214	14.2365	12.9782	13.182	12.9019	13.2078	YES	YES
20 uM Staurosporine vs. DMSO	VADFGLSR	-2.47509	4.58647	ABL2	Tyrosine-protein kinase ABL2	P42684	425	16.5087	16.7207	16.8119	16.7366	13.244	14.4049	14.6061	14.6225	YES	YES
20 uM Staurosporine vs. DMSO	FVVSLAYAYETK	-0.765571	2.40969	GRK6	G protein-coupled receptor kinase 6	P43250	245	12.9176	13.2301	13.1328	13.367	12.1359	12.4596	12.393	12.5968	YES	YES
20 uM Staurosporine vs. DMSO	ISDFGLSK	-2.96917	4.96281	SYK	Tyrosine-protein kinase SYK	P43405	510	14.3844	14.3738	14.4896	14.7059	11.4805	10.6947	12.2253	11.6765	YES	YES
20 uM Staurosporine vs. DMSO	LFPDVLFPADSEHNKLK	-2.18197	3.27826	MAPK8	Mitogen-activated protein kinase 8	P45983	274	11.655	12.2074	11.7992	12.5685	9.47658	9.57857	10.7665	9.68056	YES	YES
20 uM Staurosporine vs. DMSO	TACTNFMMTPYVVTR	-2.6253	3.13757	MAPK9	Mitogen-activated protein kinase 9	P45984	175	13.417	13.2337	13.2555	12.8451	9.23812	11.3983	10.2221	11.3914	YES	YES
20 uM Staurosporine vs. DMSO	EFSPSFINFVNLCLTKDESKRPK	-1.58463	1.47292	MAP2K4	Dual specificity mitogen-activated protein kinase kinase 4	P45985	335	10.858	9.85618	9.66185	10.8498	9.27264	9.63006	8.88346	7.10116	YES	YES
20 uM Staurosporine vs. DMSO	DVKPSNVLINK	-0.244389	1.16414	MAP2K3	Dual specificity mitogen-activated protein kinase kinase 3	P46734	190	14.3888	14.1681	14.2123	14.101	14.0157	14.1046	13.9165	13.8558	YES	YES
20 uM Staurosporine vs. DMSO	AKELPTLKDNDFINEGQK	-0.267237	1.22489	PIP4K2A	Phosphatidylinositol 5-phosphate 4-kinase type-2 alpha	P48426	227	15.5045	15.1335	15.1804	15.0952	14.7945	14.8704	15.0757	15.1041	NO	YES
20 uM Staurosporine vs. DMSO	QHIPYREDK	0.859276	0.838213	CSNK1A1	Casein kinase I isoform alpha	P48729	171	11.5929	10.5451	12.617	13.1249	12.45	13.0428	13.0322	12.7921	YES	YES
20 uM Staurosporine vs. DMSO	MMQGGVGIPTIR	-0.427758	2.47915	CSNK1D	Casein kinase I isoform delta	P48730	58	14.7647	14.7344	14.9163	14.6419	14.5002	14.2408	14.2771	14.3282	YES	YES
20 uM Staurosporine vs. DMSO	LTDFGFAK	-0.373603	1.95127	MAPKAPK2	MAP kinase-activated protein kinase 2	P49137	205	15.4385	15.5926	15.429	15.726	15.0852	15.0957	15.0706	15.4403	YES	YES
20 uM Staurosporine vs. DMSO	TSNPYHHDQLDR	1.34299	1.45043	CDK8	Cyclin-dependent kinase 8	P49336	243	11.6679	10.1039	12.1736	9.94776	12.3878	12.4235	11.9543	12.4994	YES	YES
20 uM Staurosporine vs. DMSO	DVKPDNFLMGLGKK	-0.382259	1.87531	CSNK1E	Casein kinase I isoform epsilon	P49674	128	14.1108	14.0232	13.9565	13.9727	13.6132	13.5198	13.8251	13.576	YES	YES
20 uM Staurosporine vs. DMSO	LTLGEALQHPFFAR	-1.69085	1.88512	CLK2	Dual specificity protein kinase CLK2	P49760	468	12.6963	12.2175	10.6456	12.6587	10.6766	10.6893	9.50137	10.5874	YES	YES
20 uM Staurosporine vs. DMSO	IGDWLQER	-1.02969	1.10265	CLK3	Dual specificity protein kinase CLK3	P49761	296	12.5179	14.2364	14.3973	13.374	11.5916	12.7877	12.5946	13.4329	YES	YES
20 uM Staurosporine vs. DMSO	TPPEAIALCSSLLEYTPSSR	-2.37437	7.12482	GSK3A	Glycogen synthase kinase-3 alpha	P49840	372	15.3105	15.1422	15.0715	15.1202	12.8798	12.918	12.5181	12.831	YES	YES
20 uM Staurosporine vs. DMSO	LLEYTPTAR	-2.82146	7.43948	GSK3B	Glycogen synthase kinase-3 beta	P49841	320	16.3853	16.5731	16.5083	15.9752	13.4805	13.5484	13.4203	13.7069	YES	YES
20 uM Staurosporine vs. DMSO	ELLLSELLGR	0.950915	0.657598	STK19	Inactive serine/threonine-protein kinase 19	P49842	206	9.47949	12.7027	12.6485	12.7292	12.5801	12.8283	12.8866	13.0687	YES	YES
20 uM Staurosporine vs. DMSO	LLESLQENHFQEDEQFLGAVMPR	-0.33512	1.67561	SEPHS1	Selenide, water dikinase 1	P49903	41	16.149	15.7434	16.0895	16.229	15.7119	15.6225	15.8911	15.6449	NO	YES
20 uM Staurosporine vs. DMSO	LDFLGEGQFATVYK	-2.52897	6.70728	CDK7	Cyclin-dependent kinase 7	P50613	15	14.8469	15.1305	15.0856	15.1096	12.1469	12.6093	12.6719	12.6286	YES	YES
20 uM Staurosporine vs. DMSO	AANVLITR	-1.85959	7.24577	CDK9	Cyclin-dependent kinase 9	P50750	152	16.3708	16.3473	16.3352	16.501	14.6997	14.6392	14.3182	14.4588	YES	YES
20 uM Staurosporine vs. DMSO	KDGLVSLLTTSEGADEPQRLQFPLPTAQR	-0.406896	2.39953	GALK1	Galactokinase	P51570	69	16.046	15.9308	15.6898	15.9584	15.3022	15.5313	15.5891	15.5749	NO	YES
20 uM Staurosporine vs. DMSO	TASVLWPWINR	0.210509	0.810553	IRAK1	Interleukin-1 receptor-associated kinase 1	P51617	66	15.6303	15.9139	16.1713	15.6183	15.896	16.1888	16.0514	16.0397	YES	YES
20 uM Staurosporine vs. DMSO	DILVEVNHPFIVK	-1.47548	7.10116	RPS6KA3	Ribosomal protein S6 kinase alpha-3	P51812	120	16.8782	16.9434	17.1125	16.8927	15.6362	15.448	15.4788	15.3618	YES	YES
20 uM Staurosporine vs. DMSO	YSDELNEIITR	1.23798	0.828289	NEK2	Serine/threonine-protein kinase Nek2	P51955	240	9.21083	13.0107	11.2145	12.5661	12.6903	13.3404	12.478	12.4453	YES	YES
20 uM Staurosporine vs. DMSO	MIGEGSFGR	-3.48752	1.46623	NEK3	Serine/threonine-protein kinase Nek3	P51956	9	15.1578	14.7257	17.1533	14.4753	16.2499	10.8674	9.67938	10.7654	YES	YES
20 uM Staurosporine vs. DMSO	QSQEEMSSSGPSVR	0.729633	0.621531	NEK4	Serine/threonine-protein kinase Nek4	P51957	623	10.8162	10.9182	10.8464	8.74618	11.9153	10.8169	10.6955	10.8178	YES	YES
20 uM Staurosporine vs. DMSO	LSPELLNTGR	-1.09892	1.95343	HK2	Hexokinase-2	P52789	324	13.8501	13.9535	13.3906	14.1146	12.7068	12.9921	11.8331	13.3812	NO	YES
20 uM Staurosporine vs. DMSO	MAAAAEPGAR	1.90591	1.06472	DGKQ	Diacylglycerol kinase theta	P52824	1	9.80625	9.70426	10.6883	9.60227	10.7154	13.2654	9.42544	14.0185	NO	YES
20 uM Staurosporine vs. DMSO	AGVPGVAAPGAPAAAPPAK	-1.55926	4.56048	PLK1	Serine/threonine-protein kinase PLK1	P53350	20	14.2267	14.6291	14.5863	14.6205	12.5813	12.8647	13.1193	13.2602	YES	YES
20 uM Staurosporine vs. DMSO	LNFITEYIK	-2.0363	2.60296	LIMK1	LIM domain kinase 1	P53667	409	11.3759	11.8098	11.4452	11.3306	9.26768	8.36388	10.5217	9.66303	YES	YES
20 uM Staurosporine vs. DMSO	LNLLTEYIEGGTLKDFLR	-1.00304	2.11823	LIMK2	LIM domain kinase 2	P53671	401	11.7096	11.5597	11.8137	11.7991	10.6791	11.2355	10.5578	10.3976	YES	YES
20 uM Staurosporine vs. DMSO	DLKPSNIVVK	-2.82362	3.00714	MAPK10	Mitogen-activated protein kinase 10	P53779	189	14.7371	14.3592	14.1083	14.4445	11.9593	12.3368	12.3245	9.7339	YES	YES
20 uM Staurosporine vs. DMSO	SYHEEFNPPKEPMKDDITGEPLIR	-0.379038	1.70613	AK2	Adenylate kinase 2, mitochondrial	P54819	151	18.8203	18.3464	18.1293	18.3864	18.1015	18.0071	18.0712	17.9864	NO	YES
20 uM Staurosporine vs. DMSO	EMAIPVLEAR	0.234192	1.88014	ALDH18A1	Delta-1-pyrroline-5-carboxylate synthase	P54886	150	17.3488	17.3643	17.5072	17.2029	17.6798	17.4881	17.6156	17.5765	NO	YES
20 uM Staurosporine vs. DMSO	TGCTFPEKPDFH	-0.501576	0.686589	ADK	Adenosine kinase	P55263	351	12.3265	13.3883	13.6171	14.1296	12.8259	13.0185	12.5647	13.0461	NO	YES
20 uM Staurosporine vs. DMSO	INNACFEAVVVTNTIPQEDKMK	-0.313921	2.08304	PRPS1	Ribose-phosphate pyrophosphokinase 1	P60891	261	15.3893	15.1259	15.1676	15.286	14.8932	14.8392	15.0401	14.9406	NO	YES
20 uM Staurosporine vs. DMSO	VYTDVNTHRPR	0.52965	2.81747	CSNK2A1	Casein kinase II subunit alpha	P68400	11	16.3564	16.238	16.4483	15.9754	16.7569	16.975	16.7183	16.6864	YES	YES
20 uM Staurosporine vs. DMSO	LHVGEESKK	-0.349347	1.58225	PIP4K2B	Phosphatidylinositol 5-phosphate 4-kinase type-2 beta	P78356	250	14.6188	14.3608	14.649	14.2264	14.2102	14.1042	13.993	14.1502	NO	YES
20 uM Staurosporine vs. DMSO	IGDLFNGR	-3.12567	8.62513	SRPK2	SRSF protein kinase 2	P78362	73	18.7803	18.9222	18.9709	19.1194	15.7884	15.9832	15.5447	15.9738	YES	YES
20 uM Staurosporine vs. DMSO	DQNILLGTTYR	0.254308	1.78983	PRKDC	DNA-dependent protein kinase catalytic subunit	P78527	3325	17.1462	16.8929	17.0879	16.9376	17.3835	17.3348	17.1007	17.2627	YES	YES
20 uM Staurosporine vs. DMSO	ISAYSALSHPYFQDLER	0.445539	4.62926	CDK6	Cyclin-dependent kinase 6	Q00534	289	16.64	16.7761	16.7102	16.7464	17.1038	17.1885	17.1672	17.1953	YES	YES
20 uM Staurosporine vs. DMSO	DLKPQNLLINR	-2.77621	8.83107	CDK5	Cyclin-dependent kinase 5	Q00535	126	17.4396	17.5952	17.4733	17.4458	14.6679	14.8489	14.4832	14.8491	YES	YES
20 uM Staurosporine vs. DMSO	VSLSEIGFGKLETYIK	-0.892693	1.32026	CDK16	Cyclin-dependent kinase 16	Q00536	152	14.0279	14.0441	13.2572	13.5385	13.7814	12.0153	12.9875	12.5129	YES	YES
20 uM Staurosporine vs. DMSO	ATESPATR	2.14113	0.589803	GALK2	N-acetylgalactosamine kinase	Q01415	2	10.0546	10.1566	9.17259	3.00119	9.14545	8.057	10.7212	13.0258	NO	YES
20 uM Staurosporine vs. DMSO	NESCSENYTTDFIYQLYSEEGKGVFDCRK	-0.589156	1.59746	PFKP	ATP-dependent 6-phosphofructokinase, platelet type	Q01813	638	13.2798	13.4299	13.3267	13.7355	12.8663	12.547	13.3194	12.6827	NO	YES
20 uM Staurosporine vs. DMSO	DVKPSNILVNSR	-0.3453	3.60966	MAP2K1	Dual specificity mitogen-activated protein kinase kinase 1	Q02750	190	18.6638	18.7647	18.7278	18.7895	18.5083	18.3995	18.3087	18.3479	YES	YES
20 uM Staurosporine vs. DMSO	LTGAGGGGCGITLLKPGLEQPEVEATK	-0.464744	0.940568	MVK	Mevalonate kinase	Q03426	331	14.1046	13.5719	13.057	13.7919	13.3528	12.7076	13.192	13.414	NO	YES
20 uM Staurosporine vs. DMSO	LKIEDFILHK	-3.37393	6.553	PRKCQ	Protein kinase C theta type	Q04759	375	13.4167	13.7416	13.8904	13.5654	10.3094	10.3348	10.1075	10.3668	YES	YES
20 uM Staurosporine vs. DMSO	NVLVSSNDCVK	-2.26609	4.73063	PTK2	Focal adhesion kinase 1	Q05397	551	14.3722	14.1816	14.1078	14.297	12.3181	12.4435	11.7399	11.3927	YES	YES
20 uM Staurosporine vs. DMSO	TINWTLLEK	-3.69163	5.40152	PRKCD	Protein kinase C delta type	Q05655	605	13.4063	13.0633	13.5126	13.0447	9.73459	9.83657	8.75059	9.93856	YES	YES
20 uM Staurosporine vs. DMSO	LVQLYGVCTK	1.64532	8.55364	BTK	Tyrosine-protein kinase BTK	Q06187	457	15.5449	15.5464	15.5535	15.5035	17.2489	17.1844	17.0571	17.2392	YES	YES
20 uM Staurosporine vs. DMSO	AGPCILPIVR	0.180448	0.708393	TNK2	Activated CDC42 kinase 1	Q07912	840	13.7248	13.8407	14.0122	13.6366	13.9009	13.915	14.0866	14.0336	YES	YES
20 uM Staurosporine vs. DMSO	LLQHPFTTQQLPR	-2.21227	1.76017	MAP4K2	Mitogen-activated protein kinase kinase kinase kinase 2	Q12851	267	10.5891	13.7346	11.4601	13.0661	9.22571	10.8298	10.5157	9.42968	YES	YES
20 uM Staurosporine vs. DMSO	ATATQLLQHPFVR	-2.61494	7.53036	STK4	Serine/threonine-protein kinase 4	Q13043	270	14.9501	14.908	14.7512	15.0266	12.3875	12.27	12.1686	12.3501	YES	YES
20 uM Staurosporine vs. DMSO	AWALLQKR	0.446638	1.26875	COASY	Bifunctional coenzyme A synthase	Q13057	548	12.88	13.6952	13.5892	13.4029	13.823	13.9769	13.6787	13.8752	NO	YES
20 uM Staurosporine vs. DMSO	IGHYILGDTLGVGTFGK	-3.25943	9.02904	PRKAA1	5'-AMP-activated protein kinase catalytic subunit alpha-1	Q13131	24	16.6954	16.4396	16.5327	16.4627	13.3735	13.3142	13.0579	13.3472	YES	YES
20 uM Staurosporine vs. DMSO	GLTYLWSLK	1.50256	2.80989	MAP2K5	Dual specificity mitogen-activated protein kinase kinase 5	Q13163	270	10.4872	10.6772	10.3381	10.4679	12.2578	11.2751	12.4137	12.034	YES	YES
20 uM Staurosporine vs. DMSO	LTDFGFCAQITPEQSKR	-1.55483	9.13054	PAK2	Serine/threonine-protein kinase PAK 2	Q13177	384	18.3197	18.2773	18.292	18.3494	16.8351	16.6913	16.7203	16.7723	YES	YES
20 uM Staurosporine vs. DMSO	NAKPVSILR	-5.59434	7.09143	STK3	Serine/threonine-protein kinase 3	Q13188	280	15.1091	15.3617	15.469	15.2147	9.29529	9.39728	10.5853	9.49927	YES	YES
20 uM Staurosporine vs. DMSO	LSASSEDISER	0.484236	0.599356	MAP3K1	Mitogen-activated protein kinase kinase kinase 1	Q13233	920	12.2261	11.8795	12.8301	10.9766	12.7033	12.2194	12.617	12.3096	YES	YES
20 uM Staurosporine vs. DMSO	LDPQQIK	1.76311	0.342412	PRKG2	cGMP-dependent protein kinase 2	Q13237	172	9.92142	17.4958	15.8402	9.71744	16.6711	9.99534	16.158	17.2028	YES	YES
20 uM Staurosporine vs. DMSO	YLNWDAVFR	0.188602	0.878544	ATM	Serine-protein kinase ATM	Q13315	54	14.3695	14.4425	14.65	14.3154	14.5541	14.8039	14.5489	14.625	YES	YES
20 uM Staurosporine vs. DMSO	NELQMQLASK	0.227508	1.36205	ROCK1	Rho-associated protein kinase 1	Q13464	1074	15.2878	15.2198	15.4716	15.094	15.5379	15.4585	15.5722	15.4146	YES	YES
20 uM Staurosporine vs. DMSO	VQSGMGLILQGYESGSEEEGEIHEK	1.6742	3.48877	PRPF4B	Serine/threonine-protein kinase PRP4 homolog	Q13523	129	10.7748	11.6863	10.8114	11.5027	12.8823	12.8898	12.9711	12.7287	YES	YES
20 uM Staurosporine vs. DMSO	YIFSHLVCSCSKDELER	-1.64897	2.49993	ATR	Serine/threonine-protein kinase ATR	Q13535	1035	10.8968	10.9619	10.0148	10.2959	8.70675	8.8906	9.54831	8.42784	YES	YES
20 uM Staurosporine vs. DMSO	LNNEEHNELR	0.649178	3.0957	RIPK1	Receptor-interacting serine/threonine-protein kinase 1	Q13546	168	13.1813	13.0999	13.2237	13.1015	13.8292	13.7887	13.699	13.8862	YES	YES
20 uM Staurosporine vs. DMSO	GAILTTMLVSR	-1.2926	5.36509	CAMK2G	Calcium/calmodulin-dependent protein kinase type II subunit gamma	Q13555	302	15.9379	16.0293	15.9428	16.057	14.369	14.9221	14.7126	14.7929	YES	YES
20 uM Staurosporine vs. DMSO	NGLTFPFICK	0.111503	0.350066	ITPK1	Inositol-tetrakisphosphate 1-kinase	Q13572	148	13.3264	13.5735	13.4551	13.5273	13.529	13.7555	13.4137	13.6302	NO	YES
20 uM Staurosporine vs. DMSO	YLLDHAPPEILDAVEENGETCLHQAAALGQR	-1.18033	1.31709	DGKZ	Diacylglycerol kinase zeta	Q13574	841	11.6899	10.9558	11.8683	12.1226	10.4362	9.38699	11.6361	10.456	NO	YES
20 uM Staurosporine vs. DMSO	IVDFGSSCQLGQR	-3.17137	5.14147	DYRK1A	Dual specificity tyrosine-phosphorylation-regulated kinase 1A	Q13627	305	12.8293	13.4002	13.3251	13.378	9.81286	9.91485	10.7663	9.75318	YES	YES
20 uM Staurosporine vs. DMSO	CVDKFDIIGIIGEGTYGQVYK	-0.813242	2.30168	CDK13	Cyclin-dependent kinase 13	Q14004	701	12.7272	12.7839	12.4548	12.9564	12.1431	11.8164	11.7388	11.9711	YES	YES
20 uM Staurosporine vs. DMSO	KSGELVAVK	0.143326	0.0674388	IKBKE	Inhibitor of nuclear factor kappa-B kinase subunit epsilon	Q14164	30	10.1215	10.0195	8.72955	11.8837	8.75669	10.6748	11.0694	10.8267	YES	YES
20 uM Staurosporine vs. DMSO	NILVASPECVK	-2.63187	2.64522	PTK2B	Protein-tyrosine kinase 2-beta	Q14289	554	12.9027	14.0121	14.2153	14.1254	9.88354	11.928	10.4725	12.444	YES	YES
20 uM Staurosporine vs. DMSO	YWTESNGVESK	1.30017	1.01387	MELK	Maternal embryonic leucine zipper kinase	Q14680	396	10.1052	13.0802	12.0484	9.90119	12.3152	12.6782	12.7161	12.6262	YES	YES
20 uM Staurosporine vs. DMSO	GVPGQVDFYAR	-2.40025	1.66501	PDK1	[Pyruvate dehydrogenase (acetyl-transferring)] kinase isozyme 1, mitochondrial	Q15118	41	14.0842	13.4595	13.4204	14.2824	10.7964	12.8524	9.00493	12.9918	YES	YES
20 uM Staurosporine vs. DMSO	IERLFSYMYSTAPTPQPGTGGTPLAGFGYGLPISR	0.164254	0.575212	PDK2	[Pyruvate dehydrogenase (acetyl-transferring)] kinase isozyme 2, mitochondrial	Q15119	300	14.3326	14.6901	14.6483	14.6602	14.4673	14.8795	14.7067	14.9347	YES	YES
20 uM Staurosporine vs. DMSO	ISDLGGGVPLR	-0.318964	0.437168	PDK3	[Pyruvate dehydrogenase (acetyl-transferring)] kinase isozyme 3, mitochondrial	Q15120	285	13.7103	14.0733	14.6504	14.3715	13.5074	13.2064	14.5249	14.2909	YES	YES
20 uM Staurosporine vs. DMSO	KSGKDFVTEALQSR	0.481699	0.814295	PMVK	Phosphomevalonate kinase	Q15126	19	13.6333	13.8431	14.1788	13.6261	14.1404	13.5915	14.3678	15.1084	NO	YES
20 uM Staurosporine vs. DMSO	EITLLLR	-0.935283	2.45966	CDK10	Cyclin-dependent kinase 10	Q15131	86	13.0173	13.1772	13.0082	13.5317	12.2117	12.5268	12.4242	11.8305	YES	YES
20 uM Staurosporine vs. DMSO	SVVGTPAYLAPEVLR	0.87639	1.07775	PRKD1	Serine/threonine-protein kinase D1	Q15139	742	13.6878	13.7128	11.7441	12.7489	13.7126	14.328	13.4894	13.8692	YES	YES
20 uM Staurosporine vs. DMSO	LSDFGLCTGLKK	-4.81285	7.4152	STK38	Serine/threonine-protein kinase 38	Q15208	228	14.8285	14.8567	14.4485	14.9737	10.362	10.1189	9.67165	9.70353	YES	YES
20 uM Staurosporine vs. DMSO	DLKPENILLDEEGHIKITDFGLSK	-0.163683	0.130974	RPS6KA2	Ribosomal protein S6 kinase alpha-2	Q15349	184	9.33257	9.51237	10.8023	9.61436	10.0507	9.94872	8.76074	9.84673	YES	YES
20 uM Staurosporine vs. DMSO	DILADVNHPFVVK	-1.83499	6.81523	RPS6KA1	Ribosomal protein S6 kinase alpha-1	Q15418	114	15.6174	15.7714	15.6475	15.7414	14.0976	13.9088	13.7525	13.6789	YES	YES
20 uM Staurosporine vs. DMSO	IADFGLCK	-1.19596	6.10983	PKN1	Serine/threonine-protein kinase N1	Q16512	756	16.8843	16.8992	17.1098	17.1438	15.7846	15.9779	15.7065	15.7843	YES	YES
20 uM Staurosporine vs. DMSO	LIDWSALMDKK	-1.3323	2.72052	PKN2	Serine/threonine-protein kinase N2	Q16513	918	12.9506	12.794	12.7767	12.1952	11.8868	11.0559	11.0287	11.4159	YES	YES
20 uM Staurosporine vs. DMSO	TLFPGTDHIDQLK	-0.573241	1.42058	MAPK14	Mitogen-activated protein kinase 14	Q16539	221	13.5161	13.4003	13.0415	13.3495	13.2757	12.7963	12.4342	12.5082	YES	YES
20 uM Staurosporine vs. DMSO	DIGTAIQFLHSHNIAHR	-1.42838	0.95839	MAPKAPK3	MAP kinase-activated protein kinase 3	Q16644	149	13.2212	13.4836	12.8619	12.4613	12.5123	12.6993	8.9664	12.1366	YES	YES
20 uM Staurosporine vs. DMSO	NAPLAGFGYGLPISR	0.238236	0.610409	PDK4	[Pyruvate dehydrogenase (acetyl-transferring)] kinase isozyme 4, mitochondrial	Q16654	324	13.0023	12.6697	12.9416	12.4664	12.9383	12.907	13.1935	12.9941	YES	YES
20 uM Staurosporine vs. DMSO	AEKFESLMNIHGFDLGSR	-1.93123	0.893045	MAPK6	Mitogen-activated protein kinase 6	Q16659	2	11.4537	10.601	10.8064	10.3409	10.4079	10.5099	9.42386	5.13558	YES	YES
20 uM Staurosporine vs. DMSO	EALSEEIKK	0.195483	1.05155	GUK1	Guanylate kinase	Q16774	183	14.1055	14.3286	14.3605	14.3822	14.4498	14.4947	14.5522	14.462	NO	YES
20 uM Staurosporine vs. DMSO	IVYYLMNIHVQPR	1.04314	1.28248	PFKFB3	6-phosphofructo-2-kinase/fructose-2,6-bisphosphatase 3	Q16875	235	9.9939	10.0398	8.74988	8.99726	10.8381	10.949	9.76102	10.4053	NO	YES
20 uM Staurosporine vs. DMSO	DRPQNVDISRPPEEALVTVPAHQ	-0.56282	1.985	PFKFB4	6-phosphofructo-2-kinase/fructose-2,6-bisphosphatase 4	Q16877	447	14.8807	14.4883	14.3594	14.4613	13.6249	13.9925	14.1682	14.1529	NO	YES
20 uM Staurosporine vs. DMSO	DLKVENILLHDR	-1.62518	2.76686	AAK1	AP2-associated protein kinase 1	Q2M2I8	176	11.8694	11.7226	11.3661	11.8229	9.90058	9.79859	10.8846	9.6966	YES	YES
20 uM Staurosporine vs. DMSO	LKEDQIK	0.0569197	0.228461	HKDC1	Hexokinase HKDC1	Q2TB90	14	17.5111	17.4053	17.2737	17.4047	17.6917	17.2986	17.2883	17.544	NO	YES
20 uM Staurosporine vs. DMSO	ETSISAGYEVCQHEVLGGGR	-0.933056	4.10135	MYLK3	Myosin light chain kinase 3	Q32MK0	506	14.2815	14.1413	14.2108	14.0886	13.1167	13.1349	13.3921	13.3463	YES	YES
20 uM Staurosporine vs. DMSO	IYIYTLK	0.272791	1.03939	LRRK1	Leucine-rich repeat serine/threonine-protein kinase 1	Q38SD2	1603	17.0199	17.3633	17.5479	17.7103	17.5024	17.7529	17.7146	17.7627	YES	YES
20 uM Staurosporine vs. DMSO	VAPAEPQEAPDSTAAGGSASKR	-0.77556	1.12003	TKFC	Triokinase/FMN cyclase	Q3LXA3	352	10.9751	10.2314	9.74152	10.6266	9.64042	9.16178	9.82156	9.84865	NO	YES
20 uM Staurosporine vs. DMSO	VATQAVEDVLNIAK	0.739825	0.47668	NADK2	NAD kinase 2, mitochondrial	Q4G0N4	326	12.8868	10.9639	13.4152	13.9876	12.5085	12.8874	14.2916	14.5253	NO	YES
20 uM Staurosporine vs. DMSO	AVLDLVDQCPK	-0.289231	0.460225	CMPK2	UMP-CMP kinase 2, mitochondrial	Q5EBM0	235	13.3113	13.1828	12.7708	13.4288	13.0128	13.1833	12.1202	13.2204	NO	YES
20 uM Staurosporine vs. DMSO	EPEEAHKEKPYR	-0.71282	1.11871	NOL9	Polynucleotide 5'-hydroxyl-kinase NOL9	Q5SY16	682	10.6885	9.86915	10.8891	10.2539	10.0704	9.60529	9.6068	9.56694	NO	YES
20 uM Staurosporine vs. DMSO	LHREDFEILK	-2.42264	4.85097	CDC42BPA	Serine/threonine-protein kinase MRCK alpha	Q5VT25	72	12.6615	12.6364	12.4035	12.809	10.1069	9.91764	10.2142	10.5812	YES	YES
20 uM Staurosporine vs. DMSO	LASSTAPYIPELR	-1.72047	4.28553	CDC42BPG	Serine/threonine-protein kinase MRCK gamma	Q6DT37	345	14.6419	14.7225	14.7093	15.0647	12.6387	13.5859	13.2312	12.8006	YES	YES
20 uM Staurosporine vs. DMSO	VLLVQFK	-1.24807	4.02479	PKN3	Serine/threonine-protein kinase N3	Q6P5Z2	573	13.5174	14.0034	14.1284	14.0457	12.5823	12.6673	12.6756	12.7774	YES	YES
20 uM Staurosporine vs. DMSO	LFSSSRPPTEMK	-2.39956	0.868212	PPIP5K1	Inositol hexakisphosphate and diphosphoinositol-pentakisphosphate kinase 1	Q6PFW1	1004	13.8959	14.3897	14.2756	10.3555	9.25532	8.73634	10.5453	14.7815	NO	YES
20 uM Staurosporine vs. DMSO	ASVENLLTEIEILK	-1.03988	2.89782	ULK3	Serine/threonine-protein kinase ULK3	Q6PHR2	54	12.6866	12.8917	12.9147	12.806	11.742	12.0998	11.464	11.8338	YES	YES
20 uM Staurosporine vs. DMSO	DVIVPENGEPVGTR	2.01802	1.66543	DSTYK	Dual serine/threonine and tyrosine protein kinase	Q6XUX3	442	9.24509	11.7936	12.3142	9.44907	12.5217	12.9225	12.633	12.7968	YES	YES
20 uM Staurosporine vs. DMSO	IIDKTQLNSSSLQK	-1.50144	1.33408	MARK2	Serine/threonine-protein kinase MARK2	Q7KZI7	83	10.4167	13.1239	11.4707	10.6207	9.50756	9.60955	10.7975	9.71154	YES	YES
20 uM Staurosporine vs. DMSO	AGNILLTEPGQVK	-5.36676	4.69836	TAOK1	Serine/threonine-protein kinase TAO1	Q7L7X3	154	15.8402	15.7392	15.5621	15.9109	12.3166	9.32629	10.5143	9.42828	YES	YES
20 uM Staurosporine vs. DMSO	SIIMQIVNALK	-1.58043	1.61295	TLK2	Serine/threonine-protein kinase tousled-like 2	Q86UE8	569	10.2416	9.92632	10.4862	10.3957	9.14671	9.2487	6.98199	9.35069	YES	YES
20 uM Staurosporine vs. DMSO	DVKPDNILLDER	-3.24916	3.9157	STK32C	Serine/threonine-protein kinase 32C	Q86UX6	216	13.6251	13.3019	13.4942	13.3632	11.4484	9.74634	9.13801	10.4551	YES	YES
20 uM Staurosporine vs. DMSO	AGLAASIAGSSIINK	-0.128707	0.254358	DGKH	Diacylglycerol kinase eta	Q86XP1	726	12.7598	12.6469	12.7972	12.5248	12.3477	12.2773	12.8651	12.7238	NO	YES
20 uM Staurosporine vs. DMSO	QVLDAVYYLHR	-1.59162	2.54987	CAMK1D	Calcium/calmodulin-dependent protein kinase type 1D	Q8IU85	127	11.9539	12.5937	12.3526	11.7714	10.9753	10.8733	9.6853	10.7713	YES	YES
20 uM Staurosporine vs. DMSO	YLCGALQTSIVLLEWVEPMQK	0.144935	0.139911	MAP4K3	Mitogen-activated protein kinase kinase kinase kinase 3	Q8IVH8	687	10.2155	10.7798	10.8072	9.8327	10.5233	10.2734	11.288	10.1301	YES	YES
20 uM Staurosporine vs. DMSO	RESGSGPSTDTLSAASLPWPPGSSQLGR	-1.30461	1.40594	KSR1	Kinase suppressor of Ras 1	Q8IVT5	190	11.4759	11.8387	11.8473	12.5241	9.56915	11.9194	10.0666	10.9125	YES	YES
20 uM Staurosporine vs. DMSO	AVVAGIQQAHAEQLANMR	0.367254	0.735133	MAPKAPK5	MAP kinase-activated protein kinase 5	Q8IW41	324	13.3973	12.5042	12.7178	12.5806	13.2657	13.407	13.2114	12.7849	YES	YES
20 uM Staurosporine vs. DMSO	TGPELSQLTALR	0.280669	0.732325	LMTK2	Serine/threonine-protein kinase LMTK2	Q8IWU2	582	13.4027	13.9334	13.8526	13.6888	14.1554	14.2107	14.0874	13.5467	YES	YES
20 uM Staurosporine vs. DMSO	GNALKEDCIAYICR	-0.455303	1.69007	MINK1	Misshapen-like kinase 1	Q8N4C8	122	14.0811	13.889	13.8776	14.0327	13.6192	13.7544	13.1587	13.5269	YES	YES
20 uM Staurosporine vs. DMSO	LQALLGDNEK	-0.620728	2.26214	PIK3C3	Phosphatidylinositol 3-kinase catalytic subunit type 3	Q8NEB9	573	14.9402	14.8948	15.3031	15.4482	14.3449	14.3495	14.6085	14.8006	NO	YES
20 uM Staurosporine vs. DMSO	AAILGDTIMVAK	0.737463	2.27321	COQ8A	Atypical kinase COQ8A, mitochondrial	Q8NI60	2	12.6948	13.2087	12.6489	12.515	13.3743	13.6776	13.4272	13.5383	YES	YES
20 uM Staurosporine vs. DMSO	IMDYSLLLGIHDIIR	-1.53905	4.25247	PIP4K2C	Phosphatidylinositol 5-phosphate 4-kinase type-2 gamma	Q8TBX8	278	13.8798	13.8204	13.7077	13.6363	12.6593	12.0907	12.2228	11.9151	NO	YES
20 uM Staurosporine vs. DMSO	LVILDYIIR	-1.32697	2.46619	PI4K2B	Phosphatidylinositol 4-kinase type 2-beta	Q8TCG2	293	12.374	12.1572	12.6363	12.2608	10.2209	11.3219	11.3407	11.237	NO	YES
20 uM Staurosporine vs. DMSO	LCDFGLAR	-0.0333804	0.0881274	MAPK15	Mitogen-activated protein kinase 15	Q8TD08	153	17.9748	18.3106	18.179	18.5195	17.9998	18.4823	18.0863	18.2821	YES	YES
20 uM Staurosporine vs. DMSO	TLNIFLTK	-0.842633	4.7124	NEK9	Serine/threonine-protein kinase Nek9	Q8TD19	179	15.8584	16.1013	16.1594	16.0698	15.2642	15.2479	15.0169	15.2893	YES	YES
20 uM Staurosporine vs. DMSO	MDEQSQGMQGPPVPQFQPQK	-1.02291	0.623715	NEK7	Serine/threonine-protein kinase Nek7	Q8TDX7	1	13.3662	12.1613	10.8282	11.5145	9.54755	12.4278	9.88074	11.9225	YES	YES
20 uM Staurosporine vs. DMSO	IHAENLYGISDPLVSDSMK	-1.44357	1.36652	TTN	Titin	Q8WZ42	17913	9.26248	11.0653	11.0201	11.456	8.90996	8.80797	10.4289	8.88289	YES	YES
20 uM Staurosporine vs. DMSO	FYSSSLLVIYDGKECR	-1.05335	1.52254	IP6K1	Inositol hexakisphosphate kinase 1	Q92551	330	13.1559	11.9103	12.8692	13.1198	10.9584	11.808	11.6624	12.4131	NO	YES
20 uM Staurosporine vs. DMSO	DTPMLLYLNTHTALEQMR	-0.30881	1.6004	CLP1	Polyribonucleotide 5'-hydroxyl-kinase Clp1	Q92989	87	14.951	14.6272	14.8228	14.9821	14.618	14.391	14.639	14.4998	NO	YES
20 uM Staurosporine vs. DMSO	IKEDNFFQVSK	0.161267	1.41246	RFK	Riboflavin kinase	Q969G6	138	15.8219	15.9316	15.9794	16.0036	16.0589	16.1704	16.0527	16.0998	NO	YES
20 uM Staurosporine vs. DMSO	FYAAEIASALGYLHSIK	-3.03157	3.53485	SGK3	Serine/threonine-protein kinase Sgk3	Q96BR1	265	11.6719	11.4344	11.5311	11.4482	9.80723	7.44478	8.25872	8.44865	YES	YES
20 uM Staurosporine vs. DMSO	VASLEEVPFAAASIGQVHQGLLR	0.220173	0.0997366	COQ8B	Atypical kinase COQ8B, mitochondrial	Q96D53	207	11.9882	11.1612	12.2028	9.36148	11.4021	9.55346	12.353	12.2857	YES	YES
20 uM Staurosporine vs. DMSO	VWMIDFGK	-1.53193	1.16145	ITPKC	Inositol-trisphosphate 3-kinase C	Q96DU7	634	11.8486	11.5085	10.9815	9.86238	7.52137	10.1176	10.182	10.2523	NO	YES
20 uM Staurosporine vs. DMSO	ILGTPDYLAPELLLGR	-1.14929	4.32472	MASTL	Serine/threonine-protein kinase greatwall	Q96GX5	738	14.3634	14.609	14.7464	14.528	13.3486	13.6237	13.1551	13.5221	YES	YES
20 uM Staurosporine vs. DMSO	HLSEVETLQTLQKK	-0.480643	0.921856	WNK4	Serine/threonine-protein kinase WNK4	Q96J92	1145	13.8271	13.6311	12.6257	13.3299	12.8595	13.0957	12.6171	12.9189	YES	YES
20 uM Staurosporine vs. DMSO	MEGISNFK	0.195499	1.01756	PBK	Lymphokine-activated killer T-cell-originated protein kinase	Q96KB5	1	16.4227	16.2988	16.3253	16.0834	16.7	16.3424	16.4993	16.3705	YES	YES
20 uM Staurosporine vs. DMSO	EVGVDSSLTDTR	1.2736	1.1334	NEK1	Serine/threonine-protein kinase Nek1	Q96PY6	682	10.8842	13.2401	13.6396	11.3176	13.1012	13.5242	13.7802	13.7702	YES	YES
20 uM Staurosporine vs. DMSO	LLHAQYGELIQPR	-1.81814	2.17719	SMG1	Serine/threonine-protein kinase SMG1	Q96Q15	2932	18.9648	18.9778	18.9413	19.1047	18.8987	16.3802	16.5024	16.9347	YES	YES
20 uM Staurosporine vs. DMSO	LDEPLASYIFR	-1.06693	1.03119	PASK	PAS domain-containing serine/threonine-protein kinase	Q96RG2	1100	11.5044	12.8208	12.3947	12.7152	11.7142	12.241	11.4354	9.77705	YES	YES
20 uM Staurosporine vs. DMSO	IADFGVSNEFK	-3.67204	6.63256	CAMKK2	Calcium/calmodulin-dependent protein kinase kinase 2	Q96RR4	328	13.9051	13.8945	14.18	14.024	10.1703	10.0683	10.7689	10.3079	YES	YES
20 uM Staurosporine vs. DMSO	FYIPEGCIQR	1.71908	1.43847	RPS6KC1	Ribosomal protein S6 kinase delta-1	Q96S38	899	9.23287	9.13089	11.3897	9.0289	10.5578	12.6878	11.6272	10.7859	YES	YES
20 uM Staurosporine vs. DMSO	DYIQSTMETEKTPQGLSNLAK	-0.880117	1.72414	TP53RK	EKC/KEOPS complex subunit TP53RK	Q96S44	124	12.5896	12.4698	12.7151	13.1681	11.2606	12.4189	11.9221	11.8206	YES	YES
20 uM Staurosporine vs. DMSO	IGSGFFSEVFK	-0.380849	0.414574	TESK2	Dual specificity testis-specific protein kinase 2	Q96S53	64	12.097	12.6857	12.9948	12.0605	11.116	11.8938	12.7732	12.5316	YES	YES
20 uM Staurosporine vs. DMSO	ATAAECLR	-2.87882	8.30623	SRPK1	SRSF protein kinase 1	Q96SB4	642	17.2294	17.1173	16.9674	17.2063	14.2482	14.3831	13.9666	14.4072	YES	YES
20 uM Staurosporine vs. DMSO	ALLSASPEVVVAVGFPGAGK	-0.431241	1.05268	PNKP	Bifunctional polynucleotide phosphatase/kinase	Q96T60	359	13.4535	13.2181	12.7115	13.4326	12.7453	13.0671	12.6086	12.6697	NO	YES
20 uM Staurosporine vs. DMSO	FVDGGMFATELEYMRDPSTPLVDLNSNQR	-0.792177	1.30917	PIK3R4	Phosphoinositide 3-kinase regulatory subunit 4	Q99570	202	11.4278	12.1074	11.587	11.3972	10.9721	11.3574	10.8349	10.1863	YES	YES
20 uM Staurosporine vs. DMSO	TAAGLMHTFNAHAATDITGFGILGHSQNLAK	-0.598208	0.752951	SEPHS2	Selenide, water dikinase 2	Q99611	301	12.1847	11.7529	11.4519	12.1531	10.4219	11.7707	10.9858	11.9713	NO	YES
20 uM Staurosporine vs. DMSO	ALVHDGDTVSVHRPGFYAER	0.850657	0.89807	PIP5K1A	Phosphatidylinositol 4-phosphate 5-kinase type-1 alpha	Q99755	421	12.1776	11.3794	10.0656	12.1899	12.3166	11.77	12.5625	12.5661	NO	YES
20 uM Staurosporine vs. DMSO	LQTICMSGTGMR	-0.851539	1.10437	MAP3K3	Mitogen-activated protein kinase kinase kinase 3	Q99759	514	10.3131	10.4151	9.43106	10.5171	9.14802	9.04603	10.132	8.94404	YES	YES
20 uM Staurosporine vs. DMSO	DILLQGLK	-0.996958	4.56492	VRK1	Serine/threonine-protein kinase VRK1	Q99986	322	15.1442	15.3671	15.3576	15.6148	14.2191	14.3871	14.3924	14.4972	YES	YES
20 uM Staurosporine vs. DMSO	LLCQTFIK	1.02397	1.49858	EIF2AK1	Eukaryotic translation initiation factor 2-alpha kinase 1	Q9BQI3	93	13.3442	12.1704	11.7317	11.5781	13.5	13.2373	13.3488	12.8341	YES	YES
20 uM Staurosporine vs. DMSO	ELFEFVTDPSITHENMDAYLSK	-0.283767	1.54426	RIOK1	Serine/threonine-protein kinase RIO1	Q9BRS2	380	14.2137	14.3197	14.3209	14.1931	13.8249	14.0034	14.0799	14.0041	YES	YES
20 uM Staurosporine vs. DMSO	SSSESYTQSFQSR	-0.386217	0.771235	PI4K2A	Phosphatidylinositol 4-kinase type 2-alpha	Q9BTU6	460	12.8793	13.0467	12.7036	12.9286	12.8673	12.506	11.8706	12.7692	NO	YES
20 uM Staurosporine vs. DMSO	GLPTPQVLQR	1.6204	1.73188	MKNK1	MAP kinase-interacting serine/threonine-protein kinase 1	Q9BUB5	382	10.5115	12.9039	12.6366	11.1075	12.9666	13.4879	13.9355	13.2511	YES	YES
20 uM Staurosporine vs. DMSO	NHEIVPGSLIASIASLK	-0.773218	5.74357	RIOK2	Serine/threonine-protein kinase RIO2	Q9BVS4	29	16.7608	16.8673	16.9018	16.8741	16.0907	16.057	15.9779	16.1855	YES	YES
20 uM Staurosporine vs. DMSO	DIYGGDYER	0.238715	0.436515	PANK2	Pantothenate kinase 2, mitochondrial	Q9BZ23	452	12.8841	13.4839	13.7103	14.0794	13.587	13.7501	13.9369	13.8386	NO	YES
20 uM Staurosporine vs. DMSO	LSSTSLASGHSVR	2.30911	2.45398	PRKD2	Serine/threonine-protein kinase D2	Q9BZL6	196	9.64208	12.5349	11.1453	11.8318	13.9603	13.3029	13.4461	13.6811	YES	YES
20 uM Staurosporine vs. DMSO	QVVILSQDSFYR	0.183374	0.949132	UCK2	Uridine-cytidine kinase 2	Q9BZX2	55	17.3905	17.2233	17.1947	16.8886	17.3616	17.4617	17.3022	17.3052	NO	YES
20 uM Staurosporine vs. DMSO	AGNILFTLDGDIK	-2.71825	7.80155	SLK	STE20-like serine/threonine-protein kinase	Q9H2G2	158	16.2443	16.3211	16.3305	16.455	13.9446	13.6101	13.432	13.4913	YES	YES
20 uM Staurosporine vs. DMSO	VLIDLIQR	-2.21956	8.23626	TAOK3	Serine/threonine-protein kinase TAO3	Q9H2K8	285	16.4123	16.5374	16.5303	16.5501	14.2188	14.4599	14.13	14.3432	YES	YES
20 uM Staurosporine vs. DMSO	AFGGPGAGCISEGR	0.103141	1.05038	FN3K	Fructosamine-3-kinase	Q9H479	16	17.4343	17.2425	17.3454	17.3751	17.4706	17.4102	17.4686	17.4605	NO	YES
20 uM Staurosporine vs. DMSO	KEKPELSEPSHLNGPSSDPEAAFLSR	-0.829864	1.22387	WNK1	Serine/threonine-protein kinase WNK1	Q9H4A3	1996	12.3153	12.0927	11.9396	11.4441	10.6635	10.5065	11.7391	11.5631	YES	YES
20 uM Staurosporine vs. DMSO	ELGCSSVR	0.717181	2.49119	FN3KRP	Ketosamine-3-kinase	Q9HA64	8	14.4612	14.8758	15.1393	14.5223	15.29	15.4538	15.3666	15.757	NO	YES
20 uM Staurosporine vs. DMSO	DLTSFAAEAIAMNR	0.619063	0.77581	MKNK2	MAP kinase-interacting serine/threonine-protein kinase 2	Q9HBH9	391	10.7175	11.0861	10.119	10.3094	11.8653	11.0106	11.4312	10.4012	YES	YES
20 uM Staurosporine vs. DMSO	YFVQLCSAVEHMHSR	0.491467	0.571569	NEK6	Serine/threonine-protein kinase Nek6	Q9HC98	152	11.4733	11.0766	12.2306	10.7035	12.2527	11.2275	12.2802	11.6895	YES	YES
20 uM Staurosporine vs. DMSO	IAGLYDLDKTLGR	-0.623994	0.693504	SNRK	SNF-related serine/threonine-protein kinase	Q9NRH2	12	10.7498	10.0605	9.35789	10.5459	9.38503	9.28304	10.369	9.18105	YES	YES
20 uM Staurosporine vs. DMSO	MEKYHVLEMIGEGSFGR	0.439348	0.0724082	STK36	Serine/threonine-protein kinase 36	Q9NRP7	1	9.04804	17.1015	16.977	16.5634	10.4131	17.1233	16.7827	17.1282	YES	YES
20 uM Staurosporine vs. DMSO	NIHCLIR	-5.45685	6.97206	BMP2K	BMP-2-inducible protein kinase	Q9NSY1	289	15.2865	15.1159	15.0716	15.6593	9.52158	9.60012	10.6861	9.49813	YES	YES
20 uM Staurosporine vs. DMSO	SANILLDEAFTAK	-1.13841	6.47741	IRAK4	Interleukin-1 receptor-associated kinase 4	Q9NWZ3	314	16.6218	16.834	16.7181	16.8664	15.7094	15.5536	15.6715	15.5522	YES	YES
20 uM Staurosporine vs. DMSO	LADIVVPR	-0.475565	1.22956	UCKL1	Uridine-cytidine kinase-like 1	Q9NWZ5	274	14.069	13.9679	13.5274	14.0633	13.9563	13.3207	13.2076	13.2408	NO	YES
20 uM Staurosporine vs. DMSO	LFLAMEK	0.424885	0.302828	SPHK1	Sphingosine kinase 1	Q9NYA1	302	12.0855	10.0917	10.1873	11.0153	12.329	11.4686	10.1916	11.0901	NO	YES
20 uM Staurosporine vs. DMSO	QIASNTSLQR	0.274537	1.5393	MAP3K20	Mitogen-activated protein kinase kinase kinase 20	Q9NYL2	581	15.0122	15.1133	15.3204	14.9282	15.3223	15.2675	15.4819	15.4006	YES	YES
20 uM Staurosporine vs. DMSO	AEGSSNSVVHAETK	0.182976	0.508335	CDK12	Cyclin-dependent kinase 12	Q9NYV4	1423	12.7778	12.7485	12.668	12.4416	12.7915	12.8725	12.8712	12.8326	YES	YES
20 uM Staurosporine vs. DMSO	EFIDACLNKDPSFRPTAK	-1.21803	6.40705	STK26	Serine/threonine-protein kinase 26	Q9P289	249	16.0254	15.9653	15.8808	16.1128	14.6446	14.8622	14.7774	14.8279	YES	YES
20 uM Staurosporine vs. DMSO	LFREILDGLAYIHEK	-0.618016	2.90459	EIF2AK4	eIF-2-alpha kinase GCN2	Q9P2K8	828	14.2436	14.3622	14.3089	14.0428	13.5314	13.7889	13.5072	13.6578	YES	YES
20 uM Staurosporine vs. DMSO	KLILSDELKPAHR	-1.45783	1.21474	PI4KB	Phosphatidylinositol 4-kinase beta	Q9UBF8	238	11.2847	12.7285	12.3119	12.3543	10.2353	11.8612	11.7232	9.02838	NO	YES
20 uM Staurosporine vs. DMSO	VDPPFRPCLQSEEDVSQFDTR	-0.57806	2.1273	RPS6KB2	Ribosomal protein S6 kinase beta-2	Q9UBS0	341	15.0149	14.5801	14.4987	14.4735	14.0527	13.8845	14.3594	13.9584	YES	YES
20 uM Staurosporine vs. DMSO	EVLEGLDYLHR	-1.35579	2.34512	STK39	STE20/SPS1-related proline-alanine-rich protein kinase	Q9UEW8	175	12.5243	12.812	12.9087	12.7145	12.0745	11.7487	10.5836	11.1296	YES	YES
20 uM Staurosporine vs. DMSO	LFAIEEETTTR	-0.521233	4.15062	TBK1	Serine/threonine-protein kinase TBK1	Q9UHD2	70	17.1654	17.2527	17.4148	17.3551	16.7371	16.8522	16.688	16.8258	YES	YES
20 uM Staurosporine vs. DMSO	HLPDQLASVTR	0.6463	0.427102	SHPK	Sedoheptulokinase	Q9UHJ6	377	12.1127	10.9006	11.2052	9.71665	12.7758	11.0885	10.2941	12.3619	NO	YES
20 uM Staurosporine vs. DMSO	YAVGEECDFEVGKEK	-0.788875	1.40033	BAZ1B	Tyrosine-protein kinase BAZ1B	Q9UIG0	114	12.1793	12.4328	12.0196	12.9131	11.6234	10.9539	11.8223	11.9897	YES	YES
20 uM Staurosporine vs. DMSO	AVIMGAPGSGK	2.27556	1.23512	AK3	GTP:AMP phosphotransferase AK3, mitochondrial	Q9UIJ7	10	8.92524	13.1552	14.1777	13.5426	14.3914	14.7454	14.8292	14.9371	NO	YES
20 uM Staurosporine vs. DMSO	IEETNRPMKK	0.842108	1.60236	TNIK	TRAF2 and NCK-interacting protein kinase	Q9UKE5	816	10.8126	11.521	10.7075	10.4021	11.6878	11.7246	11.666	11.7332	YES	YES
20 uM Staurosporine vs. DMSO	YLLLHLLGR	-2.23161	5.1434	TLK1	Serine/threonine-protein kinase tousled-like 1	Q9UKI8	456	14.3505	14.5268	14.2487	14.3968	12.7178	12.1582	11.7815	11.9389	YES	YES
20 uM Staurosporine vs. DMSO	HSLDQDLLR	4.08414	2.26714	TAOK2	Serine/threonine-protein kinase TAO2	Q9UL54	655	12.0009	10.0921	9.10812	14.5047	14.2344	16.0393	15.8069	15.9618	YES	YES
20 uM Staurosporine vs. DMSO	LKLSGVVR	-0.0158655	0.0887033	MOK	MAPK/MAK/MRK overlapping kinase	Q9UQ07	352	17.3125	17.2773	17.3345	17.3162	17.195	17.2736	17.2407	17.4678	YES	YES
20 uM Staurosporine vs. DMSO	IWPGYSELPVVKK	-1.85237	1.22184	CDK11A	Cyclin-dependent kinase 11A	Q9UQ88	649	11.159	11.5399	11.0155	11.4164	7.07592	8.79351	10.7782	11.0736	NO	YES
20 uM Staurosporine vs. DMSO	ILQALHLQFGK	1.05668	1.01033	GNE	Bifunctional UDP-N-acetylglucosamine 2-epimerase/N-acetylmannosamine kinase	Q9Y223	343	8.9797	8.87771	8.79	8.77572	10.8351	10.9371	9.11265	8.76508	NO	YES
20 uM Staurosporine vs. DMSO	SDVTIVK	-0.045385	0.0385674	AKT3	RAC-gamma serine/threonine-protein kinase	Q9Y243	2	10.3265	10.8467	10.6908	9.60483	10.5802	9.92924	9.89971	10.8782	YES	YES
20 uM Staurosporine vs. DMSO	VQPEELR	0.364209	1.16543	CHKB	Choline/ethanolamine kinase	Q9Y259	64	16.3456	16.2111	15.7845	16.4644	16.4347	16.675	16.2904	16.8623	NO	YES
20 uM Staurosporine vs. DMSO	LGLDDFESLK	-3.51506	7.18773	STK38L	Serine/threonine-protein kinase 38-like	Q9Y2H1	85	14.4767	14.7108	14.6123	14.6765	10.8831	10.8663	11.3299	11.3368	YES	YES
20 uM Staurosporine vs. DMSO	DLDWTGLLR	0.288725	0.271441	MAST1	Microtubule-associated serine/threonine-protein kinase 1	Q9Y2H9	649	10.756	10.1554	9.47064	10.96	10.9791	10.8771	9.86563	10.7751	YES	YES
20 uM Staurosporine vs. DMSO	ASGMLSFFR	0.604077	2.08012	PIKFYVE	1-phosphatidylinositol 3-phosphate 5-kinase	Q9Y2I7	1740	13.9351	14.6613	14.5037	14.7468	15.0785	15.0225	15.1521	15.0101	NO	YES
20 uM Staurosporine vs. DMSO	IGYYEIDR	-4.56034	6.36518	SIK3	Serine/threonine-protein kinase SIK3	Q9Y2K2	63	13.9379	14.0141	13.9201	14.0089	9.24041	9.13842	10.2244	9.03643	YES	YES
20 uM Staurosporine vs. DMSO	LLGQGAFGR	-0.969116	2.62571	MAP3K2	Mitogen-activated protein kinase kinase kinase 2	Q9Y2U5	361	13.1393	13.8999	13.9008	13.7178	12.9931	12.6426	12.6677	12.478	YES	YES
20 uM Staurosporine vs. DMSO	MLLPNILLTGTPGVGK	0.150265	1.00078	AK6	Adenylate kinase isoenzyme 6	Q9Y3D8	1	16.1163	16.2199	16.2679	16.0385	16.198	16.3442	16.2498	16.4517	NO	YES
20 uM Staurosporine vs. DMSO	VVASSTGHLADSSR	-0.977685	1.12612	WNK2	Serine/threonine-protein kinase WNK2	Q9Y3S1	2006	10.9355	9.81329	9.54353	10.7315	8.87928	8.98127	10.1692	9.08326	YES	YES
20 uM Staurosporine vs. DMSO	LGSHAAVGASAPSAPTAHPQPRPPQGPLALPGPSYAGNSPLIGR	-0.374064	0.940129	DCAF1	DDB1- and CUL4-associated factor 1	Q9Y4B6	913	13.4021	13.0308	12.6071	13.1722	12.7899	12.7168	12.5287	12.6805	NO	YES
20 uM Staurosporine vs. DMSO	GANILLTDHGDVK	-1.98958	4.42373	MAP4K5	Mitogen-activated protein kinase kinase kinase kinase 5	Q9Y4K4	143	12.9206	12.9264	12.7754	12.9849	11.142	10.4339	10.9641	11.1091	YES	YES
20 uM Staurosporine vs. DMSO	LLGPANSGVAR	-0.510923	2.96359	NME7	Nucleoside diphosphate kinase 7	Q9Y5B8	175	15.2477	15.1451	15.3155	14.9769	14.6341	14.6739	14.5401	14.7933	NO	YES
20 uM Staurosporine vs. DMSO	GAFGEVAVVK	-1.79067	4.99663	CDC42BPB	Serine/threonine-protein kinase MRCK beta	Q9Y5S2	85	14.272	14.3109	14.5701	14.4155	12.1686	12.5787	12.7989	12.8595	YES	YES
20 uM Staurosporine vs. DMSO	LADFGVAGQLTDTQIKR	-0.95431	7.02918	STK24	Serine/threonine-protein kinase 24	Q9Y6E0	172	17.7127	17.8178	17.8127	17.8731	16.7812	16.8263	16.8784	16.9131	YES	YES
20 uM Staurosporine vs. DMSO	GANIFLTSSGLIK	-1.08927	5.6619	MAP3K4	Mitogen-activated protein kinase kinase kinase 4	Q9Y6R4	1466	15.3486	15.4517	15.5739	15.5043	14.2299	14.4476	14.3642	14.4798	YES	YES
20 uM Staurosporine vs. DMSO	SQAHVYLEQIR	0.126924	0.569058	RPS6KL1	Ribosomal protein S6 kinase-like 1	Q9Y6S9	24	21.6594	21.8443	22.0607	22.1139	21.9103	22.1672	22.0501	22.0584	YES	YES
20 uM Staurosporine vs. DMSO	AVAAAAAASAAASGGPSAAPSGENEAESR	-0.683337	1.25109	TRIM24	Transcription intermediary factor 1-alpha	O15164	8	14.3921	13.2643	13.3873	13.4375	13.3318	13.0606	12.9615	12.3941	YES	NO
20 uM Staurosporine vs. DMSO	KADTTTPTTIDPIHEPPSLPPEPK	-1.06814	1.83649	BRD4	Bromodomain-containing protein 4	O60885	291	12.7805	11.5861	11.4456	12.2	10.9694	10.8304	10.9062	11.0337	YES	NO
20 uM Staurosporine vs. DMSO	SLHSAGPPLLAVTAAPPAQPLAK	-0.159239	0.612922	BRD2	Bromodomain-containing protein 2	P25440	253	15.608	15.2917	15.1502	15.597	15.0921	15.344	15.3592	15.2147	YES	NO
20 uM Staurosporine vs. DMSO	FGFPAFSGISR	0.531854	2.9335	BLVRA	Biliverdin reductase A	P53004	162	17.7886	18.0696	17.5743	17.6551	18.3571	18.3391	18.1502	18.3687	YES	NO
20 uM Staurosporine vs. DMSO	INECVMKK	-1.71405	1.69839	RNASEL	2-5A-dependent ribonuclease	Q05823	636	10.5366	12.3007	9.65455	10.7405	8.92453	8.82255	9.90853	8.72056	YES	NO
20 uM Staurosporine vs. DMSO	VQQWDSQVTMGHLFQK	-1.45137	2.09451	ABR	Active breakpoint cluster region-related protein	Q12979	161	11.8172	11.1935	10.6865	11.4029	9.53614	10.6893	9.73703	9.33216	YES	NO
20 uM Staurosporine vs. DMSO	LLPCLHSACSACLGPAAPAAANSSGDGGAAGDGTVVDCPVCK	-1.35645	2.43061	TRIM28	Transcription intermediary factor 1-beta	Q13263	80	13.6628	13.793	12.9495	13.9415	12.1694	13.0339	11.786	11.9318	YES	NO
20 uM Staurosporine vs. DMSO	SVMIDEDMTAR	0.395431	1.69622	ILK	Integrin-linked protein kinase	Q13418	324	14.4352	14.6111	14.552	14.5851	15.21	14.6112	15.0723	14.8716	YES	NO
20 uM Staurosporine vs. DMSO	DSNPDEIEIDFETLKPTTLR	-0.298891	1.00555	BRD3	Bromodomain-containing protein 3	Q15059	608	14.5315	13.9397	13.9351	14.3562	13.9207	13.8543	13.9064	13.8855	YES	NO
20 uM Staurosporine vs. DMSO	SGVPINMVWWNRVTENNLQTPNPTASEFIPK	-1.8669	1.24544	PAN3	PAN2-PAN3 deadenylation complex subunit PAN3	Q58A45	266	13.6446	11.1403	11.0838	9.54906	8.9163	9.24503	10.6458	9.14304	YES	NO
20 uM Staurosporine vs. DMSO	VFNNIGADLLTGSESENKEDGLQNK	-1.09754	1.27809	SCYL2	SCY1-like protein 2	Q6P3W7	648	12.2626	12.4455	12.4304	12.5671	9.82708	11.5454	11.9701	11.9729	YES	NO
20 uM Staurosporine vs. DMSO	VLPWLSPEVLQQNLQGYDAK	0.387896	0.541797	STRADA	STE20-related kinase adapter protein alpha	Q7RTN6	240	10.9968	10.5386	11.2549	10.2308	11.4642	10.8912	10.8638	11.3534	YES	NO
20 uM Staurosporine vs. DMSO	LLDLENSLLGLPSFYR	0.667278	1.1375	PXK	PX domain-containing protein kinase-like protein	Q7Z7A4	303	9.99041	9.94503	10.4323	10.2181	11.0589	11.0189	10.2385	10.9387	YES	NO
20 uM Staurosporine vs. DMSO	SLQSALDVSPK	1.10304	1.47404	VRK3	Inactive serine/threonine-protein kinase VRK3	Q8IV63	265	12.2078	10.5807	10.4401	10.5716	11.969	12.2152	11.7857	12.2426	YES	NO
20 uM Staurosporine vs. DMSO	LGSFTSIR	0.951695	0.460015	TEX14	Inactive serine/threonine-protein kinase TEX14	Q8IWB6	1025	9.98955	14.5917	14.1814	13.8824	13.3575	14.6322	14.4769	13.9852	YES	NO
20 uM Staurosporine vs. DMSO	VILPQVLLGLR	0.227749	0.413205	SCYL3	Protein-associating with the carboxyl-terminal domain of ezrin	Q8IZE3	376	11.4432	11.607	11.8014	11.2446	11.977	11.6982	11.5522	11.7797	YES	NO
20 uM Staurosporine vs. DMSO	NSEDFIR	0.356021	1.54512	TBCK	TBC domain-containing protein kinase-like protein	Q8TEA7	801	14.4255	14.5354	14.3889	14.0851	14.6695	14.662	14.5741	14.9534	YES	NO
20 uM Staurosporine vs. DMSO	SMLLLAPK	0.25942	1.85145	SCYL1	N-terminal kinase-like protein	Q96KG9	411	14.7014	14.7932	14.8863	14.8284	15.1409	15.0838	14.9528	15.0695	YES	NO
20 uM Staurosporine vs. DMSO	SHLWEAAQVVPDGLGLDEAR	-2.01662	1.40074	TRIB3	Tribbles homolog 3	Q96RU7	327	13.5691	13.3373	9.91849	13.3839	10.9346	10.8326	9.6446	10.7306	YES	NO
20 uM Staurosporine vs. DMSO	EIAGLDTAPQIR	0.509904	0.419428	PEAK1	Inactive tyrosine-protein kinase PEAK1	Q9H792	155	9.44896	10.6608	10.331	10.4346	11.4086	11.5547	9.3818	10.5698	YES	NO
20 uM Staurosporine vs. DMSO	WCFYSSCEQLDQLIEALNSR	-1.07516	1.30859	BAZ1A	Bromodomain adjacent to zinc finger domain protein 1A	Q9NRL2	892	10.4336	8.89678	9.45311	10.6376	9.02751	8.51436	8.93406	8.64447	YES	NO
20 uM Staurosporine vs. DMSO	VTEEAIAR	-0.928418	0.695075	NRBP2	Nuclear receptor-binding protein 2	Q9NSY0	262	12.9353	12.1003	13.1902	12.7173	13.4158	11.6985	12.1541	9.96112	YES	NO
20 uM Staurosporine vs. DMSO	CLQSEPAR	0.593006	1.54969	NRBP1	Nuclear receptor-binding protein	Q9UHY1	307	14.7092	14.1833	14.4515	13.7373	15.0884	14.9213	14.4964	14.9472	YES	NO
20 uM Staurosporine vs. DMSO	LFCETCDR	0.659281	1.50316	TRIM33	E3 ubiquitin-protein ligase TRIM33	Q9UPN9	286	10.9491	11.4951	11.1361	11.0581	11.7584	11.7244	11.7169	12.0756	YES	NO
20 uM Staurosporine vs. DMSO	RAQATAQDPVFQK	0.706999	0.949568	TRRAP	Transformation/transcription domain-associated protein	Q9Y4A5	3403	10.8335	9.86117	10.8363	11.6687	11.3874	11.5287	11.4818	11.6298	YES	NO
20 uM Staurosporine vs. DMSO	KIPALTENDPETWIVCNFSVDHDSAPLNNR	-0.44977	3.03741	CERT1	Ceramide transfer protein	Q9Y5P4	514	15.4299	15.2452	15.1107	15.2255	14.82	14.7675	14.849	14.7757	YES	NO
20 uM Staurosporine vs. DMSO	SSQIGAVVSHQSSVIPDREYLR	1.78691	8.44235	PNPO	Pyridoxine-5'-phosphate oxidase	Q9NVS9	164	16.6235	16.4864	16.3348	16.3895	18.2866	18.2256	18.2542	18.2155	NO	NO
20 uM Staurosporine vs. DMSO	YAFDFAR	1.26797	7.08674	DCUN1D5	DCN1-like protein 5	Q9BTE7	144	15.4315	15.4929	15.6024	15.6789	16.7951	16.8801	16.7606	16.8418	NO	NO
20 uM Staurosporine vs. DMSO	LQAVTDDHIR	-1.20629	6.79263	BLVRB	Flavin reductase (NADPH)	P30043	125	17.9695	18.266	18.0934	18.1411	16.9205	17.0099	16.8085	16.9059	NO	NO
20 uM Staurosporine vs. DMSO	CLLNTSNHSGVEAFIIQNIK	4.26169	6.34973	GLMN	Glomulin	Q92990	406	11.0812	11.102	10.084	11.3755	15.0732	15.4762	14.926	15.2141	NO	NO
20 uM Staurosporine vs. DMSO	AGSKPFNPVLGETYECIR	-1.46027	5.8823	OSBPL6	Oxysterol-binding protein-related protein 6	Q9BZF3	643	15.3354	15.2955	15.4464	15.4238	13.9226	13.9481	13.6572	14.1321	NO	NO
20 uM Staurosporine vs. DMSO	LFLDRDLMTLPIQNK	-1.27267	5.61893	FECH	Ferrochelatase, mitochondrial	P22830	92	15.6328	15.669	15.7132	15.6903	14.14	14.3532	14.5905	14.5309	NO	NO
20 uM Staurosporine vs. DMSO	LWSVDHGEQSVVTAP	-1.68113	5.53468	TAB1	TGF-beta-activated kinase 1 and MAP3K7-binding protein 1	Q15750	490	14.9046	14.8136	14.9937	14.6426	12.8696	13.2189	13.1424	13.3992	NO	NO
20 uM Staurosporine vs. DMSO	NQSETLNWLSNAIKEFGFSGLNVK	3.72081	5.50412	CKAP5	Cytoskeleton-associated protein 5	Q14008	731	8.97659	9.33291	9.8586	8.77261	12.9982	13.1848	13.0607	12.5802	NO	NO
20 uM Staurosporine vs. DMSO	LLLDLFR	-1.7416	5.27453	VIPAS39	Spermatogenesis-defective protein 39 homolog	Q9H9C1	239	15.3519	15.8106	15.8675	15.704	13.89	14.2857	13.6384	13.9536	NO	NO
20 uM Staurosporine vs. DMSO	FLQVQPVSR	-3.68836	5.25818	CCNB2	G2/mitotic-specific cyclin-B2	O95067	197	12.8704	12.8802	12.9252	13.1858	8.87806	8.98005	10.168	9.08203	NO	NO
20 uM Staurosporine vs. DMSO	FVPYSYFSR	1.05093	5.07572	OSBP	Oxysterol-binding protein 1	P22059	613	16.5364	16.5445	16.456	16.3441	17.6334	17.6291	17.2051	17.6171	NO	NO
20 uM Staurosporine vs. DMSO	QNFTFLGHIQTCYR	-4.46401	4.88023	MDN1	Midasin	Q9NU22	744	18.1703	17.3979	18.253	18.189	13.1546	12.99	12.9114	15.0982	NO	NO
20 uM Staurosporine vs. DMSO	TFNTSTGGLLLPSDTKR	-0.360458	4.87697	XRCC6	X-ray repair cross-complementing protein 6	P12956	302	20.4963	20.4348	20.4224	20.4593	20.1328	20.0814	20.0583	20.0985	NO	NO
20 uM Staurosporine vs. DMSO	QGAYFYLAGNAK	3.08139	4.83789	NDOR1	NADPH-dependent diflavin oxidoreductase 1	Q9UHB4	542	9.16757	8.74402	9.83671	9.37155	12.5089	12.4614	11.9512	12.524	NO	NO
20 uM Staurosporine vs. DMSO	SQLDIIIHSLKK	-0.415435	4.79682	XRCC5	X-ray repair cross-complementing protein 5	P13010	145	18.9643	19.0345	19.0151	18.9982	18.6148	18.6472	18.4955	18.5929	NO	NO
20 uM Staurosporine vs. DMSO	DLLLTGHEDGTVR	-3.80973	4.72369	LLGL2	LLGL scribble cell polarity complex component 2	Q6P1M3	436	15.9506	15.8387	16.1589	16.128	10.7571	12.8278	12.5523	12.7	NO	NO
20 uM Staurosporine vs. DMSO	EGTAFNISSWDK	3.56262	4.71932	PRRC2B	Protein PRRC2B	Q5JSZ5	893	8.91586	8.81387	9.79787	8.71188	11.9142	12.4723	12.9343	13.1691	NO	NO
20 uM Staurosporine vs. DMSO	VTSCIHNILSGQR	-1.84611	4.53113	OSBPL3	Oxysterol-binding protein-related protein 3	Q9H4L5	686	13.1304	13.0909	13.0206	13.0153	11.2896	10.8426	11.487	11.2536	NO	NO
20 uM Staurosporine vs. DMSO	TINEVENQILTR	0.81411	4.48814	ACTN4	Alpha-actinin-4	O43707	746	14.9081	14.9806	14.7381	15.1557	15.8432	15.7743	15.7003	15.7211	NO	NO
20 uM Staurosporine vs. DMSO	VYFDETAQEIVDEFAMR	-2.67214	4.47273	UNC13B	Protein unc-13 homolog B	O14795	776	13.9488	13.7689	13.7263	13.7046	12.019	11.0624	10.8575	10.5211	NO	NO
20 uM Staurosporine vs. DMSO	VSILESLDKWER	0.675343	4.41617	PRKAR1A	cAMP-dependent protein kinase type I-alpha regulatory subunit	P10644	253	14.3214	14.3535	14.4547	14.3636	15.145	15.0555	14.9622	15.0319	NO	NO
20 uM Staurosporine vs. DMSO	AFELMHSGK	5.57502	4.38989	ADH5	Alcohol dehydrogenase class-3	P11766	358	9.18731	9.2893	10.5793	9.39129	13.283	16.4553	14.8503	16.1587	NO	NO
20 uM Staurosporine vs. DMSO	MSAYAFFVQTCR	0.323498	4.37302	HMGB3	High mobility group protein B3	O15347	13	17.4073	17.4121	17.4602	17.4082	17.7129	17.7481	17.7683	17.7525	NO	NO
20 uM Staurosporine vs. DMSO	VGLTNYAAAYCTGLLLAR	0.455706	4.33638	RPL5	Large ribosomal subunit protein uL18	P46777	90	17.8332	18.0207	17.908	17.8939	18.433	18.3596	18.27	18.416	NO	NO
20 uM Staurosporine vs. DMSO	GSRPLSSFVQK	-3.23212	4.30149	POM121C	Nuclear envelope pore membrane protein POM 121C	A8CG34	75	11.6104	12.5689	12.7446	13.5358	9.26526	9.36725	9.42953	9.46924	NO	NO
20 uM Staurosporine vs. DMSO	TNSTFNQVVLK	0.327235	4.23674	RPL18	Large ribosomal subunit protein eL18	Q07020	39	18.2033	18.2573	18.3131	18.2268	18.5443	18.5909	18.5544	18.6199	NO	NO
20 uM Staurosporine vs. DMSO	KSNFAEALAAHK	0.709119	4.15916	P4HB	Protein disulfide-isomerase	P07237	31	15.2263	14.8367	15.1221	15.1782	15.7633	15.8231	15.8284	15.7849	NO	NO
20 uM Staurosporine vs. DMSO	YLELLER	-1.56046	4.09896	CLUH	Clustered mitochondria protein homolog	O75153	517	14.5953	14.5345	14.5848	14.6004	13.4308	12.5281	12.7692	13.3451	NO	NO
20 uM Staurosporine vs. DMSO	HGYIGEFEIIDDHRAGK	-0.455131	3.96766	RPS15A	Small ribosomal subunit protein uS8	P62244	44	16.9811	17.0018	16.8455	16.9265	16.6037	16.5021	16.4098	16.4187	NO	NO
20 uM Staurosporine vs. DMSO	IKTSDVTSTK	0.468433	3.80352	DDX6	Probable ATP-dependent RNA helicase DDX6	P26196	85	15.825	15.801	16.0044	15.7897	16.2768	16.2913	16.4161	16.3096	NO	NO
20 uM Staurosporine vs. DMSO	DMIILPEMVGSMVGVYNGK	0.487445	3.78253	RPS15	Small ribosomal subunit protein uS19	P62841	82	15.9701	16.1859	16.1761	16.1119	16.7319	16.5435	16.5325	16.5859	NO	NO
20 uM Staurosporine vs. DMSO	LQIDVDGRK	-0.426632	3.76819	NSUN2	RNA cytosine C(5)-methyltransferase NSUN2	Q08J23	249	16.6601	16.5774	16.7441	16.7459	16.3127	16.1461	16.2897	16.2725	NO	NO
20 uM Staurosporine vs. DMSO	KLGLVQVELEEDGALVSK	-1.85791	3.76335	SELENOO	Protein adenylyltransferase SelO, mitochondrial	Q9BVL4	425	12.0106	11.785	11.6749	11.722	10.0233	10.1253	9.49716	10.1151	NO	NO
20 uM Staurosporine vs. DMSO	AEEQPQVELFVK	-0.890107	3.72548	CLIC1	Chloride intracellular channel protein 1	O00299	2	18.7859	18.2182	18.3967	18.1827	17.4034	17.5064	17.7123	17.401	NO	NO
20 uM Staurosporine vs. DMSO	AVTQALNR	0.471869	3.6571	TLN1	Talin-1	Q9Y490	1191	16.2983	16.2582	16.1073	16.3209	16.6637	16.6368	16.7081	16.8635	NO	NO
20 uM Staurosporine vs. DMSO	CLAMDVQAFER	0.470089	3.65622	PRKAR2B	cAMP-dependent protein kinase type II-beta regulatory subunit	P31323	373	15.5122	15.3842	15.5976	15.4024	16.0089	15.8927	15.9937	15.8815	NO	NO
20 uM Staurosporine vs. DMSO	SVIMHLLSQVR	0.530915	3.61606	OSBPL9	Oxysterol-binding protein-related protein 9	Q96SU4	373	15.2682	15.3268	15.3788	15.1581	15.9613	15.6776	15.8115	15.8052	NO	NO
20 uM Staurosporine vs. DMSO	DIGFIKLD	0.442468	3.61499	RPS29	Small ribosomal subunit protein uS14	P62273	49	17.5757	17.8479	17.6577	17.6397	18.1077	18.1834	18.0117	18.188	NO	NO
20 uM Staurosporine vs. DMSO	GEAGVPAEFSIWTR	-0.637433	3.58048	FLNB	Filamin-B	O75369	2206	16.1722	16.1761	16.2085	16.3509	15.3221	15.7838	15.6444	15.6078	NO	NO
20 uM Staurosporine vs. DMSO	FIDADVEER	3.5217	3.5469	DOP1B	Protein dopey-2	Q9Y3R5	348	11.173	9.44675	10.7367	9.54874	12.5699	13.3953	14.6139	14.413	NO	NO
20 uM Staurosporine vs. DMSO	ACLQQDLK	-2.56736	3.53134	CHD1L	Chromodomain-helicase-DNA-binding protein 1-like	Q86WJ1	134	12.4236	13.3173	12.7818	11.913	9.64258	9.74457	10.9325	9.84656	NO	NO
20 uM Staurosporine vs. DMSO	ENFCNIHVSLVPQPSSTGEQK	-0.323602	3.531	CTPS1	CTP synthase 1	P17812	173	17.4868	17.395	17.3065	17.3975	17.0217	17.0665	17.1198	17.0834	NO	NO
20 uM Staurosporine vs. DMSO	TVTPASSAK	3.05874	3.52048	DPYSL2	Dihydropyrimidinase-related protein 2	Q16555	512	8.81739	8.7154	9.6994	10.8874	12.8716	12.3106	12.8361	12.3363	NO	NO
20 uM Staurosporine vs. DMSO	LPFPIIDDR	0.38694	3.48793	PRDX6	Peroxiredoxin-6	P30041	98	19.632	19.6523	19.7217	19.8266	20.129	20.1941	19.9637	20.0936	NO	NO
20 uM Staurosporine vs. DMSO	YRLEVGIQAMEHLIHVLQTDR	-2.33031	3.47854	USO1	General vesicular transport factor p115	O60763	53	11.7759	12.9902	12.7679	13.1818	9.86463	10.3195	10.935	10.2755	NO	NO
20 uM Staurosporine vs. DMSO	LGLSTLGELK	0.364448	3.45752	TPD52L2	Tumor protein D54	O43399	81	18.0433	17.9358	17.8616	18.0528	18.4113	18.3939	18.2639	18.2823	NO	NO
20 uM Staurosporine vs. DMSO	EFGFVIPERPVVVDDVR	2.09259	3.41359	OPLAH	5-oxoprolinase	O14841	619	9.64636	9.54437	10.5284	9.44238	11.6492	12.0835	11.5176	12.2816	NO	NO
20 uM Staurosporine vs. DMSO	MATTGTPTADR	-0.91766	3.40801	DPP9	Dipeptidyl peptidase 9	Q86TI2	1	17.178	16.9456	16.9063	17.3284	16.0496	16.3241	16.4923	15.8216	NO	NO
20 uM Staurosporine vs. DMSO	GLYTLRPEWVQMAPTLFSK	-3.48953	3.37791	CACUL1	CDK2-associated and cullin domain-containing protein 1	Q86Y37	289	15.0131	14.3158	14.3878	13.5462	9.31778	11.7235	10.3168	11.9466	NO	NO
20 uM Staurosporine vs. DMSO	ITQDIFQQLLKR	0.295202	3.35178	MARS1	Methionine--tRNA ligase, cytoplasmic	P56192	365	19.266	19.418	19.4238	19.4404	19.6354	19.7435	19.6628	19.6872	NO	NO
20 uM Staurosporine vs. DMSO	FHLQNTLYPQYDPVYR	1.03226	3.31147	NIPBL	Nipped-B-like protein	Q6KC79	1342	12.6957	12.4973	12.6713	12.203	13.3618	13.756	13.479	13.5997	NO	NO
20 uM Staurosporine vs. DMSO	ELPEYYELIR	0.666825	3.30968	SMARCA4	Transcription activator BRG1	P51532	1493	15.4067	15.3244	15.2255	14.9099	15.9058	15.9885	15.7207	15.9188	NO	NO
20 uM Staurosporine vs. DMSO	GAPAAATAPAPTAHK	0.307553	3.2945	H1-10	Histone H1.10	Q92522	129	18.3046	18.3021	18.2288	18.2203	18.4605	18.6661	18.6153	18.5441	NO	NO
20 uM Staurosporine vs. DMSO	VKPLLQVTR	0.54854	3.2848	MYH10	Myosin-10	P35580	841	13.9673	13.8403	13.9556	13.9314	14.4401	14.5528	14.368	14.5279	NO	NO
20 uM Staurosporine vs. DMSO	LKAFLASPEYVNLPINGNGKQ	-0.33251	3.28472	GSTP1	Glutathione S-transferase P	P09211	190	18.3342	18.3944	18.2348	18.4509	17.9514	17.9965	18.106	18.0304	NO	NO
20 uM Staurosporine vs. DMSO	ITPAMAAR	-0.489062	3.28235	HUWE1	E3 ubiquitin-protein ligase HUWE1	Q7Z6Z7	1038	18.7664	18.5688	18.6651	18.5003	18.2685	18.1639	17.9204	18.1915	NO	NO
20 uM Staurosporine vs. DMSO	IAELLSPGSVDPLTR	0.872524	3.26698	SERPINB6	Serpin B6	P35237	146	13.251	13.7855	13.3458	13.4543	14.531	14.1389	14.2591	14.3977	NO	NO
20 uM Staurosporine vs. DMSO	NPQNSTVLAR	0.532378	3.2345	TCOF1	Treacle protein	Q13428	833	15.5091	15.1626	15.3837	15.3611	15.7403	16.012	15.8367	15.9572	NO	NO
20 uM Staurosporine vs. DMSO	SAIYGFGDQSNLR	-0.967037	3.22671	SCCPDH	Saccharopine dehydrogenase-like oxidoreductase	Q8NBX0	199	15.3579	15.2923	14.9078	15.2663	14.5076	14.5244	14.0055	13.9187	NO	NO
20 uM Staurosporine vs. DMSO	MQSVAAFAVSAVASQWER	1.10422	3.21368	OSBPL2	Oxysterol-binding protein-related protein 2	Q9H1P3	130	11.5339	11.5269	11.4811	11.316	12.4534	12.568	12.5389	12.7145	NO	NO
20 uM Staurosporine vs. DMSO	TCTTVAFTQVNSEDKGALAK	-0.494772	3.19679	RPL7A	Large ribosomal subunit protein eL8	P62424	198	16.1545	16.0951	15.7985	15.9655	15.4964	15.5574	15.4064	15.5744	NO	NO
20 uM Staurosporine vs. DMSO	DEPQEPSNKVPEQQR	-0.303563	3.19666	TPR	Nucleoprotein TPR	P12270	1629	15.9823	15.9167	15.9662	15.8946	15.6539	15.6208	15.6387	15.6321	NO	NO
20 uM Staurosporine vs. DMSO	MDPVAYR	2.53058	3.19517	QARS1	Glutamine--tRNA ligase	P47897	413	11.3218	9.72202	9.98451	9.14884	12.8645	12.719	12.5264	12.1897	NO	NO
20 uM Staurosporine vs. DMSO	AQCPIVER	0.310186	3.19308	RPS5	Small ribosomal subunit protein uS7	P46782	64	19.2021	19.3061	19.3912	19.2832	19.644	19.553	19.5295	19.6969	NO	NO
20 uM Staurosporine vs. DMSO	AEWSHTR	2.22922	3.1868	COG5	Conserved oligomeric Golgi complex subunit 5	Q9UP83	798	9.24468	9.34666	10.6366	9.44865	11.2768	11.9927	12.0583	12.2656	NO	NO
20 uM Staurosporine vs. DMSO	LQESLSR	-2.80052	3.14059	NVL	Nuclear valosin-containing protein-like	O15381	850	13.9519	14.6966	14.0879	14.0735	10.7285	10.8305	13.1164	10.9325	NO	NO
20 uM Staurosporine vs. DMSO	EFSVTDAVPFPISLIWNHDSEDTEGVHEVFSR	-1.48486	3.13158	HSPH1	Heat shock protein 105 kDa	Q92598	391	15.4309	14.3519	14.6072	14.6593	13.7387	12.7302	13.3546	13.2861	NO	NO
20 uM Staurosporine vs. DMSO	VTVKYDR	0.626361	3.12951	PPP1R14B	Protein phosphatase 1 regulatory subunit 14B	Q96C90	56	14.1405	13.8045	13.9531	14.1431	14.6286	14.7797	14.5111	14.6273	NO	NO
20 uM Staurosporine vs. DMSO	LEEGEVAMGR	-1.73372	3.12602	PDCD11	Protein RRP5 homolog	Q14690	1227	13.5884	13.1591	13.5858	12.8642	10.7533	11.9868	11.879	11.6435	NO	NO
20 uM Staurosporine vs. DMSO	MIVGNHK	3.51256	3.11335	GPAT4	Glycerol-3-phosphate acyltransferase 4	Q86UL3	445	9.82016	11.4763	8.93815	10.0241	14.2313	11.9846	14.2104	13.8828	NO	NO
20 uM Staurosporine vs. DMSO	AECMLQQAER	0.320625	3.11091	LCP1	Plastin-2	P13796	334	15.848	15.7485	15.7853	15.794	16.0324	16.198	16.1274	16.1006	NO	NO
20 uM Staurosporine vs. DMSO	LGTPELSTAER	0.369664	3.10766	ACACA	Acetyl-CoA carboxylase 1	Q13085	2151	15.8751	16.003	15.7887	15.8485	16.1681	16.3515	16.2259	16.2485	NO	NO
20 uM Staurosporine vs. DMSO	SQQNDEEPVATSQLLKPHTTSSPPDMSPFFLR	-0.899838	3.1042	UBR4	E3 ubiquitin-protein ligase UBR4	Q5T4S7	3111	14.7485	14.3432	14.0491	14.2327	13.2835	13.3611	13.6099	13.5197	NO	NO
20 uM Staurosporine vs. DMSO	LLSQSGPVHAPVFTMSVDVDGTTYEASGPSKK	-1.86132	3.10211	STRBP	Spermatid perinuclear RNA-binding protein	Q96SI9	406	12.9749	13.4905	13.0703	12.5104	12.0085	10.8993	10.6963	10.9968	NO	NO
20 uM Staurosporine vs. DMSO	AQVIYTR	0.252918	3.10199	RPS25	Small ribosomal subunit protein eS25	P62851	105	19.8327	19.8124	19.7321	19.8445	20.139	19.9888	20.0261	20.0795	NO	NO
20 uM Staurosporine vs. DMSO	FQHPSHELLK	0.773608	3.09654	LARP1	La-related protein 1	Q6PKG0	872	13.6573	14.2751	14.1538	13.8597	14.6493	14.8106	14.7766	14.804	NO	NO
20 uM Staurosporine vs. DMSO	GGSISVQVNSIKFDSE	0.424169	3.09456	NOLC1	Nucleolar and coiled-body phosphoprotein 1	Q14978	684	17.2591	17.1136	17.2781	17.4389	17.6072	17.6109	17.817	17.7512	NO	NO
20 uM Staurosporine vs. DMSO	AGYKPVAIQTYPILGEK	0.46143	3.09099	UTP15	U3 small nucleolar RNA-associated protein 15 homolog	Q8TED0	2	14.5534	14.5279	14.6357	14.4567	14.8806	15.1049	15.057	14.9768	NO	NO
20 uM Staurosporine vs. DMSO	EIFRNEK	3.36837	3.07635	POLR1C	DNA-directed RNA polymerases I and III subunit RPAC1	O15160	286	8.82505	8.72306	9.70706	10.895	11.5921	13.5994	12.6163	13.8159	NO	NO
20 uM Staurosporine vs. DMSO	AAAAPAATTATPPPEGAPPQPGVHNLPVPTLFGTVK	-3.11036	3.03915	ZC3H4	Zinc finger CCCH domain-containing protein 4	Q9UPT8	1225	12.5435	12.7933	11.9764	13.4497	9.26624	10.4652	8.05119	10.5388	NO	NO
20 uM Staurosporine vs. DMSO	ISTLPQLNSALVQDLAK	-0.425377	3.03612	CCNB1	G2/mitotic-specific cyclin-B1	P14635	412	15.0037	15.1314	15.0062	15.0376	14.5368	14.7353	14.5722	14.6331	NO	NO
20 uM Staurosporine vs. DMSO	AAVFEEIDTYERR	0.529768	3.03279	EDC3	Enhancer of mRNA-decapping protein 3	Q96F86	216	15.4956	15.5721	15.3001	15.7856	15.9802	16.1362	16.0763	16.0798	NO	NO
20 uM Staurosporine vs. DMSO	LIEESQR	0.900733	3.02368	PNN	Pinin	Q9H307	255	14.6084	13.986	14.5325	14.1237	15.2812	15.026	15.0361	15.5103	NO	NO
20 uM Staurosporine vs. DMSO	LLEASLEEQGLAVDVGETGPSPPIHSKPLTPAGHTGGPEPRPPAR	-1.46809	3.01421	BSDC1	BSD domain-containing protein 1	Q9NW68	309	13.9795	13.1102	13.2268	13.2937	12.0901	11.3161	12.2346	12.0971	NO	NO
20 uM Staurosporine vs. DMSO	TCSPASLSQASADLEATLR	1.56944	3.01374	TRIM25	E3 ubiquitin/ISG15 ligase TRIM25	Q14258	185	11.6368	11.1378	11.5231	10.7494	13.2332	12.2879	12.7659	13.038	NO	NO
20 uM Staurosporine vs. DMSO	TGSPGGPGVSGGSPAGGAGGGSSGLPPSTKK	-1.53856	3.00623	DYNC1LI1	Cytoplasmic dynein 1 light intermediate chain 1	Q9Y6G9	456	13.1376	12.9477	13.1487	13.7994	12.0136	11.8864	11.0195	11.9598	NO	NO
20 uM Staurosporine vs. DMSO	NAVQQLHK	3.22269	3.00574	CCDC186	Coiled-coil domain-containing protein 186	Q7Z3E2	281	8.8214	8.92339	10.2134	9.02538	10.6397	13.0009	12.9637	13.2701	NO	NO
20 uM Staurosporine vs. DMSO	IIAPANLERPVR	-1.91526	2.99509	ABI2	Abl interactor 2	Q9NYB9	124	11.3338	10.8085	11.6977	10.7065	8.90429	9.00628	9.86661	9.10826	NO	NO
20 uM Staurosporine vs. DMSO	EEQSQITSQVTGQIGWR	0.471168	2.97495	AP2M1	AP-2 complex subunit mu	Q96CW1	146	15.7142	15.5033	15.879	15.5417	16.1389	16.0303	16.1864	16.1673	NO	NO
20 uM Staurosporine vs. DMSO	MAHRDQEWYDAEIAR	2.61004	2.97286	CCDC50	Coiled-coil domain-containing protein 50	Q8IVM0	166	8.93393	8.83194	9.81594	10.7034	11.7901	11.7656	13.1394	12.0304	NO	NO
20 uM Staurosporine vs. DMSO	IMYTVFEHTFHVR	0.375397	2.96823	GARS1	Glycine--tRNA ligase	P41250	584	15.9032	16.0151	16.1137	15.9784	16.3337	16.3284	16.535	16.3149	NO	NO
20 uM Staurosporine vs. DMSO	LMTGHAIPPSQLDSQIDDFTGFSK	-1.41603	2.96586	CT45A10	Cancer/testis antigen family 45 member A10	P0DMU9	58	15.8423	14.6556	14.545	15.363	13.8058	13.4025	13.7193	13.8142	NO	NO
20 uM Staurosporine vs. DMSO	DANSVTSSLR	0.454065	2.95938	BZW2	eIF5-mimic protein 1	Q9Y6E2	199	14.3339	14.2339	14.1525	14.2624	14.7002	14.595	14.7393	14.7644	NO	NO
20 uM Staurosporine vs. DMSO	MYIDCWVK	1.49332	2.95771	IFRD1	Interferon-related developmental regulator 1	O00458	363	12.2345	11.0134	11.5728	11.7736	13.4213	13.3413	12.9779	12.8271	NO	NO
20 uM Staurosporine vs. DMSO	TTGIVMDSGDGVTHTVPIYEGYALPHAILR	-0.356311	2.94818	ACTB	Actin, cytoplasmic 1	P60709	148	20.6548	20.667	20.547	20.8841	20.3544	20.271	20.3146	20.3878	NO	NO
20 uM Staurosporine vs. DMSO	ESPFSTSASPLLSGSQHFDVPPRR	-1.03338	2.94692	XPO1	Exportin-1	O14980	383	15.5519	15.5757	15.1782	15.3396	14.8178	13.807	14.532	14.355	NO	NO
20 uM Staurosporine vs. DMSO	TAQSGALR	2.7632	2.91627	TXLNA	Alpha-taxilin	P40222	62	9.77601	9.29724	11.461	9.37143	11.8346	12.8167	12.8021	13.5051	NO	NO
20 uM Staurosporine vs. DMSO	VTGGIFSVTK	0.5483	2.90863	TMEM263	Transmembrane protein 263	Q8WUH6	38	16.7421	16.9039	16.935	16.9816	17.1348	17.5326	17.6635	17.425	NO	NO
20 uM Staurosporine vs. DMSO	WTVQTCLTCQR	2.03271	2.89273	RPP21	Ribonuclease P protein subunit p21	Q9H633	87	9.71759	11.1257	10.5996	9.51361	11.8966	12.7035	12.1624	12.3247	NO	NO
20 uM Staurosporine vs. DMSO	ILQDDVACDIIK	0.536378	2.89129	KRR1	KRR1 small subunit processome component homolog	Q13601	135	14.6052	14.2105	14.307	14.5225	14.8786	15.0205	14.9144	14.9772	NO	NO
20 uM Staurosporine vs. DMSO	GYVKEQFAWR	0.24403	2.8847	RPS10	Small ribosomal subunit protein eS10	P46783	56	17.5764	17.6814	17.6918	17.57	17.9364	17.8573	17.8234	17.8785	NO	NO
20 uM Staurosporine vs. DMSO	AIVDALPPPCESACTVPTDVDKWFHHQKN	-0.445255	2.88381	PPA1	Inorganic pyrophosphatase	Q15181	261	18.5798	18.2312	18.2453	18.5237	17.8639	17.9585	18.0603	17.9162	NO	NO
20 uM Staurosporine vs. DMSO	AGVIFPVGR	0.305869	2.87983	MACROH2A1	Core histone macro-H2A.1	O75367	19	16.2947	16.3812	16.477	16.4097	16.677	16.7397	16.6006	16.7688	NO	NO
20 uM Staurosporine vs. DMSO	YLQWEIGNK	-1.66761	2.87752	TRMT10C	tRNA methyltransferase 10 homolog C	Q7L0Y3	341	10.9133	11.0155	10.7875	11.6865	9.37193	9.26994	9.92244	9.16795	NO	NO
20 uM Staurosporine vs. DMSO	AIRDGVIEASINHEK	-2.75706	2.87707	PSMD3	26S proteasome non-ATPase regulatory subunit 3	O43242	441	12.8285	12.1818	12.4386	12.7027	8.981	11.4002	9.965	8.77702	NO	NO
20 uM Staurosporine vs. DMSO	SYQNEIK	0.612941	2.86293	SYNE2	Nesprin-2	Q8WXH0	4637	14.7188	15.192	14.7604	15.1831	15.572	15.506	15.5916	15.6365	NO	NO
20 uM Staurosporine vs. DMSO	SSSFTLLQSLAIEDSR	3.0979	2.85098	HECTD4	Probable E3 ubiquitin-protein ligase HECTD4	Q9Y4D8	1137	8.90915	9.01114	10.3011	9.11313	10.5519	12.8739	13.1187	13.1815	NO	NO
20 uM Staurosporine vs. DMSO	VGQILHPEECMYAVGQGALGVEVR	-0.370776	2.82711	HMBS	Porphobilinogen deaminase	P08397	202	16.2272	16.1677	16.0476	16.2167	15.7552	15.72	15.9649	15.736	NO	NO
20 uM Staurosporine vs. DMSO	FSGDLDDQTCREDLHILFSNHGEIK	-0.249558	2.82294	SSB	Lupus La protein	P05455	236	17.9894	18.0343	17.8702	17.9561	17.7261	17.6296	17.7395	17.7565	NO	NO
20 uM Staurosporine vs. DMSO	ATEHPEPPKAELQLPPPPPPGHYGAWAAQELQAK	-0.557123	2.81599	SF3B2	Splicing factor 3B subunit 2	Q13435	2	17.8633	17.3624	17.3505	17.6176	16.8828	16.9759	17.1244	16.9823	NO	NO
20 uM Staurosporine vs. DMSO	QWHSQSALFQIPEYSMGQAR	1.10777	2.8078	DNMBP	Dynamin-binding protein	Q6XZF7	132	11.7841	11.6871	11.9507	12.3314	12.9111	12.9933	13.4398	12.8404	NO	NO
20 uM Staurosporine vs. DMSO	LKPAFIKPYGTVTAANSSFLTDGASAMLIMAEEK	-1.86079	2.79944	HADHB	Trifunctional enzyme subunit beta, mitochondrial	P55084	292	12.8992	11.6303	11.3115	11.5632	9.72329	10.0226	9.99054	10.2246	NO	NO
20 uM Staurosporine vs. DMSO	MAAGPEPPEWEPR	0.551563	2.79583	RNF187	E3 ubiquitin-protein ligase RNF187	Q5TA31	110	13.9559	14.1726	13.8937	14.2494	14.5539	14.6405	14.7498	14.5336	NO	NO
20 uM Staurosporine vs. DMSO	QALSGFGYR	0.2385	2.79287	PDCD6	Programmed cell death protein 6	O75340	117	16.6204	16.7593	16.7339	16.6767	16.9146	16.97	16.9181	16.9416	NO	NO
20 uM Staurosporine vs. DMSO	LWGLTEMFPER	0.890909	2.78539	TOMM22	Mitochondrial import receptor subunit TOM22 homolog	Q9NS69	48	13.5976	13.7826	14.0078	13.1061	14.4984	14.3897	14.5735	14.5962	NO	NO
20 uM Staurosporine vs. DMSO	ELAPYDENWFYTR	0.306047	2.78033	RPS19	Small ribosomal subunit protein eS19	P39019	44	18.8884	19.1206	19.0807	19.0799	19.4464	19.3871	19.2638	19.2965	NO	NO
20 uM Staurosporine vs. DMSO	LREQAAR	2.56976	2.7725	TRIM56	E3 ubiquitin-protein ligase TRIM56	Q9BRZ2	244	10.3437	9.70925	8.72525	9.81124	12.9927	12.7373	10.8378	12.3007	NO	NO
20 uM Staurosporine vs. DMSO	LVPESLKK	0.551411	2.76997	SPART	Spartin	Q8N0X7	520	13.5659	13.6386	13.6907	13.7353	13.9964	14.278	14.3038	14.2579	NO	NO
20 uM Staurosporine vs. DMSO	IDFYFDENPYFENK	0.230514	2.76796	SET	Protein SET	Q01105	137	16.972	17.0683	16.9419	17.04	17.1855	17.2693	17.2353	17.2543	NO	NO
20 uM Staurosporine vs. DMSO	SMFAGVPTMR	0.366629	2.76632	SURF4	Surfeit locus protein 4	O15260	140	15.8507	15.9877	15.9868	15.8618	16.1123	16.29	16.4012	16.3499	NO	NO
20 uM Staurosporine vs. DMSO	NVVDSSQKPTPSAR	1.87762	2.76569	KMT2A	Histone-lysine N-methyltransferase 2A	Q03164	1236	11.2807	12.6491	10.7017	11.3747	12.9982	13.6589	13.3314	13.5282	NO	NO
20 uM Staurosporine vs. DMSO	KGDVVHCWYTGTLQDGTVFDTNIQTSAK	-0.257669	2.75345	FKBP3	Peptidyl-prolyl cis-trans isomerase FKBP3	Q00688	127	18.1643	18.2166	18.0305	18.2179	17.9603	17.8618	17.8559	17.9205	NO	NO
20 uM Staurosporine vs. DMSO	AEEYTEETEEREESTTGFDK	-1.86952	2.74888	THRAP3	Thyroid hormone receptor-associated protein 3	Q9Y2W1	792	11.1859	10.5568	10.1325	10.7041	8.0542	8.9059	9.38404	8.75702	NO	NO
20 uM Staurosporine vs. DMSO	RMENLVAYAK	2.23486	2.74344	CREBBP	CREB-binding protein	Q92793	625	8.96042	9.06241	8.87653	9.1644	10.5007	10.3987	12.3191	11.7847	NO	NO
20 uM Staurosporine vs. DMSO	ISNRPAFMPSEGK	0.998892	2.74107	ACTN2	Alpha-actinin-2	P35609	354	13.4191	14.3127	13.9664	13.5946	15.0813	14.4835	14.7744	14.9491	NO	NO
20 uM Staurosporine vs. DMSO	TLDPLVNTSSLIMR	1.12296	2.7362	AGTPBP1	Cytosolic carboxypeptidase 1	Q9UPW5	310	11.575	11.6252	11.308	11.2118	12.7305	12.6175	12.1226	12.7413	NO	NO
20 uM Staurosporine vs. DMSO	LTPVRPAAASPIVSGAR	1.04954	2.73505	KDM2A	Lysine-specific demethylase 2A	Q9Y2K7	549	12.8591	12.2661	12.4097	12.9992	13.304	13.7071	13.9367	13.7846	NO	NO
20 uM Staurosporine vs. DMSO	QVEYLDLDLDSGK	2.33543	2.73465	GAB1	GRB2-associated-binding protein 1	Q13480	624	12.2348	14.5034	14.5015	14.6452	16.5108	16.0142	16.6053	16.0963	NO	NO
20 uM Staurosporine vs. DMSO	MDGLLNPR	0.491572	2.73179	QNG1	Queuosine 5'-phosphate N-glycosylase/hydrolase	Q5T6V5	1	14.2758	14.527	14.3144	14.2139	14.9801	14.7366	14.7361	14.8446	NO	NO
20 uM Staurosporine vs. DMSO	EYGGLDVLVNNAGIAFK	-1.58082	2.73011	CBR1	Carbonyl reductase [NADPH] 1	P16152	80	12.279	13.0565	13.1233	13.1519	11.9853	10.9524	11.5445	10.8053	NO	NO
20 uM Staurosporine vs. DMSO	ADFDDRVSDEEK	1.91803	2.72861	CAPZA1	F-actin-capping protein subunit alpha-1	P52907	2	10.1618	8.95524	8.76985	8.9367	11.0407	10.8542	11.7339	10.867	NO	NO
20 uM Staurosporine vs. DMSO	IQEVADELQK	-0.401358	2.72751	ARF4	ADP-ribosylation factor 4	P18085	100	16.0874	15.964	15.881	16.0689	15.7474	15.6158	15.4187	15.6139	NO	NO
20 uM Staurosporine vs. DMSO	GSNAHEQALETGVTVTGCTVHFVAEDVDAGQIILQEAVPVKR	-1.18652	2.72675	GART	Trifunctional purine biosynthetic protein adenosine-3	P22102	924	14.172	13.3737	13.2052	13.7405	12.5363	12.5943	12.6162	11.9985	NO	NO
20 uM Staurosporine vs. DMSO	QLQAESVSEVVVNR	1.24009	2.72572	POLRMT	DNA-directed RNA polymerase, mitochondrial	O00411	72	10.5033	10.4013	10.2878	10.2993	11.1968	11.7648	11.6709	11.8197	NO	NO
20 uM Staurosporine vs. DMSO	EEQPGAAGAGAAPALDFTVENVEK	1.69645	2.71772	IPO13	Importin-13	O94829	5	9.07471	8.97272	8.57824	8.87073	10.7401	10.842	9.75606	10.944	NO	NO
20 uM Staurosporine vs. DMSO	QFCIRVENDWHR	2.31542	2.71322	RNF213	E3 ubiquitin-protein ligase RNF213	Q63HN8	4265	10.1205	9.68897	8.76284	9.96338	11.5134	11.7043	11.3568	13.2228	NO	NO
20 uM Staurosporine vs. DMSO	ERHPGSFDVVHVKDANGNSFATR	-0.394134	2.71296	RPS4X	Small ribosomal subunit protein eS4, X isoform	P62701	199	16.0615	15.8778	15.8238	15.8567	15.4201	15.557	15.6594	15.4068	NO	NO
20 uM Staurosporine vs. DMSO	VFDMLNR	0.259194	2.70588	EIF4A1	Eukaryotic initiation factor 4A-I	P60842	162	17.5651	17.6796	17.6937	17.7717	18.0115	17.9522	17.8735	17.9096	NO	NO
20 uM Staurosporine vs. DMSO	VTTLDNGLR	-3.73796	2.7053	PMPCA	Mitochondrial-processing peptidase subunit alpha	Q10713	69	11.6144	12.3271	11.4498	11.9766	9.52695	5.61535	7.95075	9.32298	NO	NO
20 uM Staurosporine vs. DMSO	VITFHKKEPFELEAFYTNLHEVPYPDAR	-0.519045	2.70381	HSPA4L	Heat shock 70 kDa protein 4L	O95757	431	15.6887	15.7484	15.5073	15.9402	15.0153	15.273	15.3661	15.1541	NO	NO
20 uM Staurosporine vs. DMSO	DLDVITIPSKDVVMVHEPK	-0.543605	2.69743	KIF2A	Kinesin-like protein KIF2A	O00139	242	15.0975	15.1103	14.7286	15.199	14.4061	14.4729	14.6245	14.4576	NO	NO
20 uM Staurosporine vs. DMSO	KYCEHDFQMLFAPCCHQCGEFIIGR	-2.20381	2.68538	LIMS1	LIM and senescent cell antigen-like-containing domain protein 1	P48059	57	12.5048	10.9477	11.1735	10.8457	8.76511	8.8671	10.0551	8.96909	NO	NO
20 uM Staurosporine vs. DMSO	IKDDGPSQSESATETAMTLPSESR	-0.939205	2.68144	LRRC40	Leucine-rich repeat-containing protein 40	Q9H9A6	369	14.2068	13.5793	13.7894	14.1625	12.979	12.7545	13.3881	12.8595	NO	NO
20 uM Staurosporine vs. DMSO	DGIEPGHIPGTVNIPFTDFLSQEGLEK	-0.854589	2.67343	MPST	3-mercaptopyruvate sulfurtransferase	P25325	198	12.7787	12.8256	13.2025	13.0247	11.9486	12.23	12.1003	12.1342	NO	NO
20 uM Staurosporine vs. DMSO	LANQFAIYKPVTDFFLQLVDAGKVDDAR	-0.566107	2.66693	LRPPRC	Leucine-rich PPR motif-containing protein, mitochondrial	P42704	1244	15.5438	15.1464	15.0128	15.1424	14.6711	14.569	14.7844	14.5566	NO	NO
20 uM Staurosporine vs. DMSO	ASALNNWCEKMEENLSEPVHCVSLNEIR	-0.491889	2.66664	SPTA1	Spectrin alpha chain, erythrocytic 1	P02549	2052	14.8958	14.7781	14.6741	14.7972	14.311	14.1589	14.1917	14.516	NO	NO
20 uM Staurosporine vs. DMSO	DVLLQVDDER	-0.386549	2.66469	MYH9	Myosin-9	P35579	1846	15.6942	15.5344	15.6283	15.8741	15.3784	15.2815	15.2663	15.2585	NO	NO
20 uM Staurosporine vs. DMSO	MVDFAGVKDKVTLVVGASQDIIPQLK	-0.842884	2.65597	COMT	Catechol O-methyltransferase	P21964	152	15.2124	14.8714	14.8673	14.9836	14.236	13.9358	14.6251	13.7664	NO	NO
20 uM Staurosporine vs. DMSO	SDKKPDREEIQMSNMGSNTK	-1.43974	2.64589	CTNND1	Catenin delta-1	O60716	879	11.8576	11.5904	11.7717	11.0469	9.79368	10.1727	10.5956	9.94569	NO	NO
20 uM Staurosporine vs. DMSO	GTDIMYTGTLDCWR	0.559667	2.64559	SLC25A5	ADP/ATP translocase 2	P05141	246	14.0949	14.2654	13.9988	13.766	14.7021	14.5438	14.5271	14.5908	NO	NO
20 uM Staurosporine vs. DMSO	DAEFKASKEILLAFSR	0.429015	2.63735	ASPM	Abnormal spindle-like microcephaly-associated protein	Q8IZT6	916	17.1668	17.6064	17.4355	17.4982	17.821	17.9762	17.7397	17.886	NO	NO
20 uM Staurosporine vs. DMSO	SVFWASSPYRR	1.24871	2.6338	SEC16A	Protein transport protein Sec16A	O15027	23	11.9328	11.3381	11.4261	11.2533	12.9195	12.1482	12.8453	13.0322	NO	NO
20 uM Staurosporine vs. DMSO	SYGPLDMYRNPGPSGPQLR	2.30833	2.6326	STX12	Syntaxin-12	Q86Y82	2	11.3862	9.43553	11.2521	9.33355	12.6852	12.4615	12.7117	12.7822	NO	NO
20 uM Staurosporine vs. DMSO	ELSDLESAR	-0.418354	2.63166	CAD	Multifunctional protein CAD	P27708	1067	16.5689	16.4218	16.4348	16.6736	16.1946	16.2365	15.8887	16.1059	NO	NO
20 uM Staurosporine vs. DMSO	AMFLQPDLDSLVDFSTNNQKK	-2.47229	2.62993	MYBBP1A	Myb-binding protein 1A	Q9BQG0	412	13.3735	11.759	11.3018	11.9334	8.88827	8.99026	10.1782	10.4218	NO	NO
20 uM Staurosporine vs. DMSO	LLQDFFNGR	0.462261	2.6277	HSPA1A	Heat shock 70 kDa protein 1A;Heat shock 70 kDa protein 1B	P0DMV8	349	15.9103	16.3238	16.2949	16.0301	16.4842	16.7161	16.5917	16.6161	NO	NO
20 uM Staurosporine vs. DMSO	LLNKHGIK	-1.77107	2.62285	RSL1D1	Ribosomal L1 domain-containing protein 1	O76021	117	11.5124	12.6748	12.7668	11.6835	11.0454	10.2178	10.1743	10.1158	NO	NO
20 uM Staurosporine vs. DMSO	ETSQVILRPSSSPNPTTIQNENLK	-1.12423	2.61784	KIDINS220	Kinase D-interacting substrate of 220 kDa	Q9ULH0	1707	13.0077	12.827	13.1283	12.7199	12.2305	11.8744	11.2484	11.8328	NO	NO
20 uM Staurosporine vs. DMSO	TSSRPAMIGSLTDGSTETFWESGDEDK	-2.02833	2.61292	MYCBP2	E3 ubiquitin-protein ligase MYCBP2	O75592	3750	14.1121	13.065	12.9509	13.0641	10.4941	12.0713	10.5699	11.9435	NO	NO
20 uM Staurosporine vs. DMSO	VHYARPSHPPPDPPILEGAVGGNEAR	-0.626053	2.61264	GAPVD1	GTPase-activating protein and VPS9 domain-containing protein 1	Q14C86	845	16.2715	16.1621	15.8899	16.5433	15.7467	15.4651	15.7169	15.4339	NO	NO
20 uM Staurosporine vs. DMSO	DLEKPFLLPVEAVYSVPGRGTVVTGTLER	-0.46761	2.60988	TUFM	Elongation factor Tu, mitochondrial	P49411	256	15.1701	15.0228	14.8829	15.1956	14.4581	14.5652	14.7599	14.6179	NO	NO
20 uM Staurosporine vs. DMSO	MINKNPER	1.55273	2.60882	SETD2	Histone-lysine N-methyltransferase SETD2	Q9BYW2	602	11.4004	10.5118	10.1596	10.4098	12.2916	12.0361	11.7449	12.6199	NO	NO
20 uM Staurosporine vs. DMSO	TGIEQGSDAGYLCESQKFGELVMTK	-0.797321	2.60598	HADHA	Trifunctional enzyme subunit alpha, mitochondrial	P40939	310	14.2065	13.7876	13.7343	13.9554	13.0624	13.3071	13.3461	12.7789	NO	NO
20 uM Staurosporine vs. DMSO	CSDAAGYPHATHDLEGPPLDAYSIQGQHTISPLDLAK	-0.39049	2.60508	PCBP1	Poly(rC)-binding protein 1	Q15365	201	17.7896	17.4938	17.4742	17.6223	17.3786	17.0876	17.1946	17.1572	NO	NO
20 uM Staurosporine vs. DMSO	SGMTTGSTLPVEGGFWAC	1.6998	2.60181	DCXR	L-xylulose reductase	Q7Z4W1	227	9.73326	9.53217	9.54848	8.33827	10.7491	11.1463	10.8836	11.1724	NO	NO
20 uM Staurosporine vs. DMSO	EQLDMAGAR	0.259232	2.59857	DCTN1	Dynactin subunit 1	Q14203	487	16.6952	16.6614	16.7286	16.5399	16.9179	16.8457	16.9795	16.919	NO	NO
20 uM Staurosporine vs. DMSO	QVAQEQFFLMCTR	-2.27755	2.59415	USP9X	Probable ubiquitin carboxyl-terminal hydrolase FAF-X	Q93008	1330	10.3181	10.2161	10.6703	10.1141	8.95331	8.85132	7.51221	6.89166	NO	NO
20 uM Staurosporine vs. DMSO	VTRVEFEELCADLFER	-0.293846	2.59391	HYOU1	Hypoxia up-regulated protein 1	Q9Y4L1	343	18.0182	17.9441	18.0576	18.224	17.6954	17.802	17.8394	17.7319	NO	NO
20 uM Staurosporine vs. DMSO	SGHTFTVNPR	-2.10824	2.58876	PPP1R18	Phostensin	Q6NYC8	468	10.538	10.4361	11.2207	12.3232	9.21038	9.14377	9.31022	8.42064	NO	NO
20 uM Staurosporine vs. DMSO	FLYSAPR	-2.35946	2.58755	TASOR	Protein TASOR	Q9UK61	587	12.6353	12.8833	13.0828	12.7732	9.51099	9.61298	10.801	12.0118	NO	NO
20 uM Staurosporine vs. DMSO	RGFAFVTFDDHDSVDKIVIQK	-0.398479	2.58528	HNRNPA1	Heterogeneous nuclear ribonucleoprotein A1	P09651	146	15.2133	15.1985	14.94	15.2468	14.7878	14.6875	14.7838	14.7457	NO	NO
20 uM Staurosporine vs. DMSO	YFQSPSR	0.910875	2.5807	SRSF7	Serine/arginine-rich splicing factor 7	Q16629	189	14.5029	14.6441	14.9176	15.0428	15.6096	15.1411	15.9939	16.0063	NO	NO
20 uM Staurosporine vs. DMSO	RYPSSISSSPQK	0.521165	2.58004	UBAP2L	Ubiquitin-associated protein 2-like	Q14157	601	14.344	14.2439	14.268	14.0382	14.7825	14.5307	14.7194	14.9463	NO	NO
20 uM Staurosporine vs. DMSO	LQDNVREDLYEAADKWVAAVGK	-1.84488	2.57946	PTGES2	Prostaglandin E synthase 2	Q9H7Z7	299	11.3047	10.5833	11.0667	10.5786	9.08143	8.96734	8.20885	9.8962	NO	NO
20 uM Staurosporine vs. DMSO	AKSPQPPVEEEDEHFDDTVVCLDTYNCDLHFK	-0.982483	2.5791	HNRNPU	Heterogeneous nuclear ribonucleoprotein U	Q00839	269	14.0727	13.5854	13.2305	13.3659	12.9006	12.441	12.567	12.4159	NO	NO
20 uM Staurosporine vs. DMSO	EIGNLLHPSVPISNDEDVDNKVER	-0.421568	2.57695	SARS1	Serine--tRNA ligase, cytoplasmic	P49591	134	15.9286	15.9556	15.593	15.661	15.3097	15.366	15.419	15.3571	NO	NO
20 uM Staurosporine vs. DMSO	LSGLSFKR	0.602666	2.5763	MARCKSL1	MARCKS-related protein	P49006	100	17.7706	17.8315	18.2662	18.0959	18.3045	18.5366	18.767	18.7668	NO	NO
20 uM Staurosporine vs. DMSO	GVVDRFSEEFVETR	-1.7968	2.57549	SNX30	Sorting nexin-30	Q5VWJ9	163	11.6042	12.0954	12.4863	12.5424	10.6511	10.5653	9.36118	10.9635	NO	NO
20 uM Staurosporine vs. DMSO	VTEGLTDVILYHQPDDKKK	-0.279276	2.57224	SYNCRIP	Heterogeneous nuclear ribonucleoprotein Q	O60506	266	16.9667	16.7939	16.7897	17.0065	16.6072	16.6229	16.583	16.6266	NO	NO
20 uM Staurosporine vs. DMSO	NYQQNYQNSESGEKNEGSESAPEGQAQQR	-0.450098	2.56908	YBX1	Y-box-binding protein 1	P67809	157	15.5985	15.1726	15.3527	15.2637	14.8086	14.9815	14.9082	14.8888	NO	NO
20 uM Staurosporine vs. DMSO	DQVTQLSQELDRANSLLNQTQQPYR	-1.83646	2.56812	PIBF1	Progesterone-induced-blocking factor 1	Q8WXW3	603	10.4633	10.5653	9.58132	10.6673	7.90709	8.10461	9.12596	8.79378	NO	NO
20 uM Staurosporine vs. DMSO	EGALFAFEMLCTMLGK	-1.62765	2.5608	GCN1	Stalled ribosome sensor GCN1	Q92616	1436	11.6672	12.4883	12.4037	12.4293	11.1159	11.1914	10.0217	10.1488	NO	NO
20 uM Staurosporine vs. DMSO	EAMGIYISTLK	0.325883	2.55894	AHSA1	Activator of 90 kDa heat shock protein ATPase homolog 1	O95433	146	16.0895	16.2637	16.3166	16.2719	16.7129	16.4814	16.5245	16.5264	NO	NO
20 uM Staurosporine vs. DMSO	QIMEFLK	3.88798	2.55732	VPS13D	Intermembrane lipid transfer protein VPS13D	Q5THJ4	285	8.92215	9.02414	10.3141	9.12612	10.287	14.2784	13.9205	14.4526	NO	NO
20 uM Staurosporine vs. DMSO	LAFSVTNNVIR	0.947627	2.55342	NUP188	Nucleoporin NUP188	Q5SRE5	816	13.6799	13.4989	13.6932	12.9038	14.5855	14.3801	13.9858	14.615	NO	NO
20 uM Staurosporine vs. DMSO	LGDQPSIGLAQTLEK	0.54561	2.55012	MTO1	Protein MTO1 homolog, mitochondrial	Q9Y2Z2	213	13.5447	13.687	13.6648	13.7611	14.2771	14.1146	14.0274	14.4209	NO	NO
20 uM Staurosporine vs. DMSO	KAIIIFVPVPQLK	0.177076	2.54078	RPS7	Small ribosomal subunit protein eS7	P62081	58	21.3303	21.3476	21.3319	21.3974	21.5193	21.5716	21.478	21.5465	NO	NO
20 uM Staurosporine vs. DMSO	AAQAPSSFQLLYDLKLPVEDKIR	-0.494795	2.54043	MTHFD1	C-1-tetrahydrofolate synthase, cytoplasmic	P11586	805	15.2934	14.9709	14.9233	15.0329	14.54	14.3795	14.7272	14.5946	NO	NO
20 uM Staurosporine vs. DMSO	LTYPQPVTPWNVQELR	0.855295	2.53854	POLR1A	DNA-directed RNA polymerase I subunit RPA1	O95602	466	12.2214	12.5187	12.7493	12.7113	13.4629	13.2283	13.2102	13.7205	NO	NO
20 uM Staurosporine vs. DMSO	LVVIDSVAAPFRCEFDSQASAPR	-1.81979	2.5283	XRCC3	DNA repair protein XRCC3	O43542	209	11.3319	11.3566	11.855	12.4591	10.2584	10.1564	8.96847	10.3401	NO	NO
20 uM Staurosporine vs. DMSO	ANQVNGNAVQLKEEEEPMDTSSVTHTEHYK	-1.03032	2.5252	HNRNPR	Heterogeneous nuclear ribonucleoprotein R	O43390	2	13.4651	12.8096	12.6981	12.7189	12.0829	11.6391	11.9618	11.8868	NO	NO
20 uM Staurosporine vs. DMSO	AYVDKYK	2.66688	2.52517	SCAF11	Protein SCAF11	Q99590	1435	11.7917	8.94486	10.7384	9.04685	12.997	12.4465	12.8553	12.8906	NO	NO
20 uM Staurosporine vs. DMSO	IITHLRK	-2.92576	2.52439	MTX1	Metaxin-1	Q13505	219	10.5948	12.2173	14.2915	12.6366	9.54569	9.4437	9.80783	9.23992	NO	NO
20 uM Staurosporine vs. DMSO	ETYVKLLSAER	0.25677	2.52426	EPPK1	Epiplakin	P58107	1637	16.4933	16.5447	16.3634	16.398	16.6565	16.7316	16.6706	16.7678	NO	NO
20 uM Staurosporine vs. DMSO	QREFEEYIRDK	-0.694851	2.52268	TCERG1	Transcription elongation regulator 1	O14776	1001	15.4002	15.7329	15.4735	15.6495	15.1534	14.5894	14.5834	15.1505	NO	NO
20 uM Staurosporine vs. DMSO	VLKNPPAGVR	-1.15335	2.52033	YTHDC2	3'-5' RNA helicase YTHDC2	Q9H6S0	673	14.218	13.5603	13.2853	14.0397	12.7418	13.0634	12.1755	12.5092	NO	NO
20 uM Staurosporine vs. DMSO	KTVGVEPAADGK	-0.298358	2.51889	RPL28	Large ribosomal subunit protein eL28	P46779	47	19.0154	18.9183	18.9418	18.8926	18.7024	18.8083	18.5089	18.5552	NO	NO
20 uM Staurosporine vs. DMSO	HESGASIKIDEPLEGSEDRIITITGTQDQIQNAQYLLQNSVK	-1.25945	2.51795	HNRNPK	Heterogeneous nuclear ribonucleoprotein K	P61978	415	14.0564	14.1499	13.4439	14.0204	12.5839	12.0816	13.4189	12.5485	NO	NO
20 uM Staurosporine vs. DMSO	TGSGDADDSLLEQANNAIGDYFADRQK	-2.97015	2.51743	WDR35	WD repeat-containing protein 35	Q9P2L0	789	11.6761	12.7272	12.5607	14.5216	9.2806	9.38258	11.4572	9.48457	NO	NO
20 uM Staurosporine vs. DMSO	AQTEWNTGTWR	0.320782	2.5153	SCAMP4	Secretory carrier-associated membrane protein 4	Q969E2	186	15.3443	15.2765	15.3004	15.2768	15.7573	15.653	15.5817	15.489	NO	NO
20 uM Staurosporine vs. DMSO	SIYVGNVDYGATAEELEAHFHGCGSVNR	-0.308394	2.51109	PABPN1	Polyadenylate-binding protein 2	Q86U42	173	16.8588	16.7982	16.6168	16.7612	16.5536	16.3682	16.3741	16.5055	NO	NO
20 uM Staurosporine vs. DMSO	NYSEGLTMHTHIVSTSNFSETSAFMPVLK	-1.36456	2.50842	SEC31A	Protein transport protein Sec31A	O94979	1181	14.7297	13.9538	13.6239	13.4423	12.4912	12.6722	13.0721	12.0558	NO	NO
20 uM Staurosporine vs. DMSO	SLGNVIDPLDVIYGISLQGLHNQLLNSNLDPSEVEKAKEGQK	-0.908738	2.5076	VARS1	Valine--tRNA ligase	P26640	866	13.9172	13.5305	13.5674	13.4927	12.4424	12.7726	13.2034	12.4545	NO	NO
20 uM Staurosporine vs. DMSO	LCSQYGTPVFSAPGHALHPGEPALGEAEER	-2.14877	2.50612	MAP1A	Microtubule-associated protein 1A	P78559	954	11.9695	11.5904	10.9273	12.6792	8.93469	9.03668	10.4023	10.1977	NO	NO
20 uM Staurosporine vs. DMSO	WLAIDANAR	0.214173	2.50451	KPNB1	Importin subunit beta-1	Q14974	80	17.345	17.3806	17.4416	17.4831	17.5908	17.6949	17.5805	17.6406	NO	NO
20 uM Staurosporine vs. DMSO	YLSEVASGDNKQTTVSNSQQAYQEAFEISKK	-0.546533	2.49814	YWHAB	14-3-3 protein beta/alpha	P31946	130	16.4118	16.0629	15.7586	15.9678	15.5068	15.397	15.5403	15.5709	NO	NO
20 uM Staurosporine vs. DMSO	IQFHNVKPEYLDAYNSLTEAVLPK	-1.09103	2.49752	NIPSNAP1	Protein NipSnap homolog 1	Q9BPW8	74	12.9865	12.5344	12.9653	13.4494	11.6218	11.7643	11.9044	12.2811	NO	NO
20 uM Staurosporine vs. DMSO	NLPQSVIENVGGK	-1.99803	2.49703	PAPOLA	Poly(A) polymerase alpha	P51003	84	14.441	14.94	14.6429	15.0913	11.4636	14.0125	13.0977	12.5494	NO	NO
20 uM Staurosporine vs. DMSO	VIYHLDEEETPYLVK	1.6337	2.49502	DVL2	Segment polarity protein dishevelled homolog DVL-2	O14641	16	9.26223	9.16024	10.0324	9.26309	10.5525	10.6545	11.3625	11.6832	NO	NO
20 uM Staurosporine vs. DMSO	CELPKLEK	0.524666	2.47763	KIF5C	Kinesin heavy chain isoform 5C	O60282	860	14.7525	14.3048	14.3717	14.2022	14.9746	14.9494	14.9151	14.8907	NO	NO
20 uM Staurosporine vs. DMSO	SLQATALR	-4.29609	2.47627	TEX10	Testis-expressed protein 10	Q9NXF1	591	13.6937	14.1031	14.2567	12.0922	6.04909	10.0848	10.9724	9.85516	NO	NO
20 uM Staurosporine vs. DMSO	YHHSAVVYGSSMFVFGGYTGDIYSNSNLK	-1.54287	2.47054	LZTR1	Leucine-zipper-like transcriptional regulator 1	Q8N653	119	13.1391	13.0223	13.5517	13.7301	10.8472	12.0844	11.7811	12.5589	NO	NO
20 uM Staurosporine vs. DMSO	EQGVTFPAIGSQAAEQAK	3.83727	2.46779	STAM	Signal transducing adapter molecule 1	Q92783	137	13.4988	9.24594	10.2299	9.14395	13.8499	15.0849	13.6547	14.8782	NO	NO
20 uM Staurosporine vs. DMSO	MDATALER	0.76546	2.46497	CAPN7	Calpain-7	Q9Y6W3	1	13.4522	13.2849	13.7513	12.9694	14.0436	14.3513	13.9966	14.1282	NO	NO
20 uM Staurosporine vs. DMSO	GGSGDILLVHATETDRK	-2.25652	2.46455	RAPGEF1	Rap guanine nucleotide exchange factor 1	Q13905	694	10.4426	12.2166	10.8092	11.6828	10.191	8.42739	8.79457	8.71211	NO	NO
20 uM Staurosporine vs. DMSO	HLVGVDSLIGPETQIGEK	-0.219825	2.46315	EIF2B3	Translation initiation factor eIF2B subunit gamma	Q9NR50	350	16.6512	16.5623	16.5623	16.6669	16.4185	16.4086	16.3343	16.4019	NO	NO
20 uM Staurosporine vs. DMSO	LLEDSEESSEETVSR	1.93512	2.46294	DHX16	Pre-mRNA-splicing factor ATP-dependent RNA helicase DHX16	O60231	99	11.258	10.4905	9.50647	11.7826	12.7306	12.8105	12.5167	12.7203	NO	NO
20 uM Staurosporine vs. DMSO	LIAGPAANSLPPIVDPDPLIPCDLMDGR	-1.23866	2.46179	EP300	Histone acetyltransferase p300	Q09472	1600	13.0446	13.0538	12.1941	12.2112	11.1439	11.5256	11.2231	11.6565	NO	NO
20 uM Staurosporine vs. DMSO	EKYLTVQNTVR	-3.5894	2.45931	ACOT9	Acyl-coenzyme A thioesterase 9, mitochondrial	Q9Y305	102	13.446	17.5394	17.642	17.4784	12.8988	13.0191	13.0078	12.8226	NO	NO
20 uM Staurosporine vs. DMSO	IPDWFLNR	0.346674	2.45927	RPS18	Small ribosomal subunit protein uS13	P62269	79	22.0061	22.2083	22.327	22.366	22.5678	22.6567	22.4851	22.5844	NO	NO
20 uM Staurosporine vs. DMSO	IIDINYYPVPEACLSNKR	-0.287219	2.45893	RRM1	Ribonucleoside-diphosphate reductase large subunit	P23921	480	17.2172	17.3888	17.1666	17.3503	16.9285	17.0287	16.9208	17.096	NO	NO
20 uM Staurosporine vs. DMSO	RYAFFMPTLPSLVSFCR	-1.39135	2.4577	INTS2	Integrator complex subunit 2	Q9H0H0	1096	10.9165	10.8145	10.2056	10.7125	8.89829	9.7254	9.35777	9.10226	NO	NO
20 uM Staurosporine vs. DMSO	ALAENSGVKANEVISK	1.96797	2.45296	CCT8	T-complex protein 1 subunit theta	P50990	451	9.40774	8.72398	10.0139	8.82597	11.5535	11.8852	11.2141	10.1908	NO	NO
20 uM Staurosporine vs. DMSO	VASVAENK	-1.26382	2.4526	NUP93	Nuclear pore complex protein Nup93	Q8N1F7	612	14.3573	13.6654	13.9159	14.2551	13.5439	12.8804	12.1336	12.5804	NO	NO
20 uM Staurosporine vs. DMSO	GRPISHSTTEDLKR	-1.88375	2.45094	ESF1	ESF1 homolog	Q9H501	57	12.4848	12.518	13.506	12.909	11.8723	11.4575	10.59	9.96281	NO	NO
20 uM Staurosporine vs. DMSO	MEMDDFNEVFQILLNTVKDSK	1.69593	2.45034	DIAPH1	Protein diaphanous homolog 1	O60610	385	8.45122	8.14947	7.68026	8.68492	9.59555	10.4108	9.32725	10.416	NO	NO
20 uM Staurosporine vs. DMSO	TASFVCR	0.331699	2.45024	SFSWAP	Splicing factor, suppressor of white-apricot homolog	Q12872	215	15.5176	15.6002	15.3352	15.5961	15.7497	15.8514	15.9138	15.861	NO	NO
20 uM Staurosporine vs. DMSO	GLNPATLSGGIDVLVVK	-1.5501	2.44445	LPIN3	Phosphatidate phosphatase LPIN3	Q9BQK8	21	10.9737	10.8717	10.5455	10.7697	8.84107	8.94306	10.131	9.04505	NO	NO
20 uM Staurosporine vs. DMSO	FFDSFGNLSSASAIMGNPK	0.300358	2.43804	HBG1	Hemoglobin subunit gamma-1	P69891	42	16.6454	16.9763	16.8774	16.8713	17.1081	17.1386	17.1312	17.194	NO	NO
20 uM Staurosporine vs. DMSO	LIPVPMVGFK	0.307868	2.43737	NUP54	Nucleoporin p54	Q7Z3B4	322	15.7349	15.8614	15.9537	15.7709	16.1143	16.2345	16.025	16.1785	NO	NO
20 uM Staurosporine vs. DMSO	AAVSVQER	0.556228	2.4355	PROSER2	Proline and serine-rich protein 2	Q86WR7	274	15.7546	15.6762	15.1647	15.3016	16.0203	15.9681	15.9848	16.1488	NO	NO
20 uM Staurosporine vs. DMSO	CQRDLIDLCCLMTISFNPSLSK	-2.81009	2.43226	RMI1	RecQ-mediated genome instability protein 1	Q9H9A7	581	13.2183	12.5818	12.9456	10.9594	8.04783	9.91925	9.68971	10.8079	NO	NO
20 uM Staurosporine vs. DMSO	VVPENLGLQEGTHELCYNTACALIGQGQLNQAMK	-0.727506	2.43185	SRP72	Signal recognition particle subunit SRP72	O76094	164	14.6763	14.3523	14.0222	14.6706	13.8143	13.7888	13.7814	13.4268	NO	NO
20 uM Staurosporine vs. DMSO	IHVLEAQDLIAKDR	-2.76702	2.42999	ESYT1	Extended synaptotagmin-1	Q9BSJ8	651	10.7795	13.7292	12.4756	13.3835	10.5978	9.1373	10.3253	9.23929	NO	NO
20 uM Staurosporine vs. DMSO	KTQQTSPDKVDYEYSELLLYQNQVLR	-0.599752	2.42855	NAA15	N-alpha-acetyltransferase 15, NatA auxiliary subunit	Q9BXJ9	176	13.8295	13.8961	13.6464	13.8532	12.9995	13.4507	13.2279	13.1481	NO	NO
20 uM Staurosporine vs. DMSO	AVLSVELDPVEGR	-0.328907	2.42737	RNF123	E3 ubiquitin-protein ligase RNF123	Q5XPI4	284	16.3404	16.1958	16.237	16.2465	16.0933	15.7516	15.929	15.9301	NO	NO
20 uM Staurosporine vs. DMSO	MDQVMQFVEPSR	0.944653	2.4248	SEC61G	Protein transport protein Sec61 subunit gamma	P60059	1	13.2214	12.8412	12.9539	12.3533	13.8927	13.354	13.909	13.9927	NO	NO
20 uM Staurosporine vs. DMSO	LDAEFQK	-0.613749	2.42274	PRKRIP1	PRKR-interacting protein 1	Q9H875	105	14.4073	13.8586	13.9481	14.0085	13.5735	13.3708	13.409	13.4142	NO	NO
20 uM Staurosporine vs. DMSO	MFQDIGVSK	1.70148	2.42061	CUL1	Cullin-1	Q13616	507	10.1161	10.0141	8.72413	10.2507	11.8263	11.1138	11.7381	11.2328	NO	NO
20 uM Staurosporine vs. DMSO	LDMEIDGQK	-2.99679	2.41572	SMARCB1	SWI/SNF-related matrix-associated actin-dependent regulator of chromatin subfamily B member 1	Q12824	191	13.7764	11.6637	14.3616	14.2542	12.0126	9.58871	10.7767	9.6907	NO	NO
20 uM Staurosporine vs. DMSO	FIMESGAK	0.243301	2.41392	RPS3	Small ribosomal subunit protein uS3	P23396	125	18.5974	18.8263	18.7681	18.6419	18.8868	18.9676	18.9461	19.0064	NO	NO
20 uM Staurosporine vs. DMSO	LELVHHGPMAVAFEVYDDFLHYK	2.14222	2.41354	CTSC	Dipeptidyl peptidase 1	P53634	362	8.82849	8.87983	7.07036	7.78952	10.6833	10.5813	9.39329	10.4793	NO	NO
20 uM Staurosporine vs. DMSO	DLIEFGMIPEFVGRLPVVVPLHSLDEK	1.94517	2.41339	CLPX	ATP-dependent Clp protease ATP-binding subunit clpX-like, mitochondrial	O76031	486	7.96725	8.45746	7.2249	8.93447	9.86513	10.538	9.40796	10.5537	NO	NO
20 uM Staurosporine vs. DMSO	AGIIEEMLEDTFESMDDQEEMEEEAEMEIDR	1.97309	2.4125	CHMP3	Charged multivesicular body protein 3	Q9Y3E7	137	9.62279	8.92762	10.1131	9.41881	11.3289	12.3963	11.8534	10.396	NO	NO
20 uM Staurosporine vs. DMSO	IFQGNVHNFEK	-3.00867	2.41221	SNRNP40	U5 small nuclear ribonucleoprotein 40 kDa protein	Q96DI7	276	13.9337	10.9198	12.2184	12.3603	10.3902	7.97011	8.92465	10.1126	NO	NO
20 uM Staurosporine vs. DMSO	ASGAPPAGLGSAR	0.807582	2.41187	EHBP1L1	EH domain-binding protein 1-like protein 1	Q8N3D4	327	14.1015	14.2752	14.5887	14.8037	15.2097	15.7045	15.0587	15.0267	NO	NO
20 uM Staurosporine vs. DMSO	SLADLPNFTPFPDEWTVEDKVLFEQAFSFHGK	-1.41812	2.4112	RCOR3	REST corepressor 3	Q9P2K3	75	12.2015	11.9964	11.8894	11.7644	10.7341	10.9564	10.8384	9.65038	NO	NO
20 uM Staurosporine vs. DMSO	ANAEELANNLKQEGHNLGLLHGDMDQSER	-1.25578	2.41113	DDX42	ATP-dependent RNA helicase DDX42	Q86XP3	509	11.6448	11.6685	12.0009	11.7808	9.96116	10.4447	11.0755	10.5906	NO	NO
20 uM Staurosporine vs. DMSO	ILDEDKESTFGYVHGVSGPVVTACDMAGAAMYELVR	-0.645619	2.41044	ATP6V1A	V-type proton ATPase catalytic subunit A	P38606	9	14.5429	14.0646	14.2597	14.0177	13.5951	13.3199	13.6644	13.723	NO	NO
20 uM Staurosporine vs. DMSO	VLQAQGSSDPEEESVLYSNR	-0.214323	2.41018	TOMM34	Mitochondrial import receptor subunit TOM34	Q15785	38	17.0848	16.9602	17.0823	17.1425	16.8814	16.8377	16.8419	16.8515	NO	NO
20 uM Staurosporine vs. DMSO	ITNQVIYLNPPIEECRYK	-2.79942	2.40396	DYNC1H1	Cytoplasmic dynein 1 heavy chain 1	Q14204	964	13.5692	10.514	12.8853	12.795	10.5645	8.94706	10.033	9.02127	NO	NO
20 uM Staurosporine vs. DMSO	KVAPIQR	0.278473	2.40203	GTF2E2	Transcription initiation factor IIE subunit beta	P29084	252	15.949	15.9112	16.0919	16.0417	16.208	16.3854	16.2184	16.2958	NO	NO
20 uM Staurosporine vs. DMSO	MLPLSLLK	0.408911	2.40097	LSM4	U6 snRNA-associated Sm-like protein LSm4	Q9Y4Z0	1	14.2057	14.1422	14.2326	13.9888	14.5972	14.5898	14.4229	14.595	NO	NO
20 uM Staurosporine vs. DMSO	GGRPNEIEPPPPEMPPWQK	-0.347577	2.4002	FAM98B	Protein FAM98B	Q52LJ0	309	16.4463	16.2848	16.1655	16.5154	15.9605	15.9458	16.0362	16.0793	NO	NO
20 uM Staurosporine vs. DMSO	MLFESLHHGLDDIQTLIK	2.93815	2.39696	TRMT1L	TRMT1-like protein	Q7Z2T5	544	8.7454	8.84739	10.1374	8.94938	12.0908	10.2122	12.2768	13.8523	NO	NO
20 uM Staurosporine vs. DMSO	LHLFPDEYIPEDILK	-0.787534	2.39269	MRPL13	Large ribosomal subunit protein uL13m	Q9BYD1	125	12.3799	12.474	12.3739	12.3655	11.5343	11.5963	11.5992	11.7133	NO	NO
20 uM Staurosporine vs. DMSO	DNDVIQDSSSALHVSSK	-1.56361	2.38918	ZFYVE16	Zinc finger FYVE domain-containing protein 16	Q7Z3T8	353	11.3518	10.7711	10.825	10.6691	8.94167	9.04366	10.2316	9.14565	NO	NO
20 uM Staurosporine vs. DMSO	FLLADNLYCK	0.155511	2.38395	VBP1	Prefoldin subunit 3	P61758	105	18.8023	18.8031	18.8446	18.8629	18.9777	19.0262	18.9417	18.9893	NO	NO
20 uM Staurosporine vs. DMSO	RCAGFVVGDLYALLTHSSR	1.1195	2.38178	PEX6	Peroxisomal ATPase PEX6	Q13608	626	9.25739	9.37252	9.57309	9.32323	10.6023	10.5003	10.5032	10.3984	NO	NO
20 uM Staurosporine vs. DMSO	QLLHLCLQDGGSPPGPGDLAEER	-1.0632	2.38127	SIPA1	Signal-induced proliferation-associated protein 1	Q96FS4	806	14.9964	14.0034	14.4523	14.1448	13.8297	12.8877	13.3022	13.3247	NO	NO
20 uM Staurosporine vs. DMSO	VDKVIQAQTAFSANPANPAILSEASAPIPHDGNLYPR	-0.657066	2.38042	SDCBP	Syntenin-1	O00560	12	14.9858	14.5102	14.454	14.8281	13.9096	13.8629	14.3547	14.0227	NO	NO
20 uM Staurosporine vs. DMSO	KSLESINSR	0.317969	2.3797	RPL30	Large ribosomal subunit protein eL30	P62888	9	18.3505	18.3944	18.3939	18.2481	18.7184	18.4555	18.6583	18.8264	NO	NO
20 uM Staurosporine vs. DMSO	FWEVISDEHGIDPTGTYHGDSDLQLERINVYYNEATGGKYVPR	-1.24444	2.37914	TUBB4B	Tubulin beta-4B chain	P68371	20	14.165	14.5621	13.9575	14.1479	12.0423	13.1205	13.158	13.534	NO	NO
20 uM Staurosporine vs. DMSO	VSSELER	5.5244	2.37868	SNAPC4	snRNA-activating protein complex subunit 4	Q5SXM2	222	9.86834	9.97033	8.98633	10.0723	16.7748	17.8229	10.5768	15.8204	NO	NO
20 uM Staurosporine vs. DMSO	VTTAAAAAATSQDPEQHLTELREPAPGTNQR	-0.636774	2.37525	COPS7A	COP9 signalosome complex subunit 7a	Q9UBW8	222	15.6665	15.1159	15.1279	15.4722	14.6847	14.5179	15.0149	14.618	NO	NO
20 uM Staurosporine vs. DMSO	NGLTEDMQK	1.19777	2.3716	CXorf38	Uncharacterized protein CXorf38	Q8TB03	287	12.1493	11.8752	13.0742	12.5162	13.4399	13.382	13.4406	14.1434	NO	NO
20 uM Staurosporine vs. DMSO	CSTLIVTDLAAR	0.319085	2.37116	DDX54	ATP-dependent RNA helicase DDX54	Q8TDD1	389	15.361	15.331	15.5961	15.4308	15.7339	15.8477	15.6879	15.7256	NO	NO
20 uM Staurosporine vs. DMSO	ELIAESKK	0.398674	2.36521	GPKOW	G-patch domain and KOW motifs-containing protein	Q92917	107	15.1205	14.9147	15.3118	15.0389	15.3825	15.5296	15.4692	15.5993	NO	NO
20 uM Staurosporine vs. DMSO	ANDHQGFYLLNSIIEHMPPESVDQYRK	-0.806303	2.3606	CSE1L	Exportin-2	P55060	742	13.974	13.996	14.0518	13.3724	12.7296	13.0941	13.2845	13.0607	NO	NO
20 uM Staurosporine vs. DMSO	FAHTNVESLVNEYDDNGEGIILFRPSHLTNKFEDKTVAYTEQK	-0.868318	2.35291	PDIA3	Protein disulfide-isomerase A3	P30101	184	15.3341	14.7624	14.4084	14.8734	13.905	13.8149	14.4161	13.769	NO	NO
20 uM Staurosporine vs. DMSO	MTILQTYFR	0.250303	2.35136	ATP6V1G1	V-type proton ATPase subunit G 1	O75348	81	17.5066	17.5491	17.5851	17.5006	17.9314	17.8216	17.7143	17.6752	NO	NO
20 uM Staurosporine vs. DMSO	GLFSANDWQCK	0.262598	2.34856	ZRANB2	Zinc finger Ran-binding domain-containing protein 2	O95218	62	18.4563	18.4187	18.5276	18.2521	18.6768	18.7665	18.6004	18.6615	NO	NO
20 uM Staurosporine vs. DMSO	LVDKEDIDTSSK	4.42318	2.34773	RBM6	RNA-binding protein 6	P78332	1043	5.1013	8.11384	3.81134	9.32075	10.756	10.9798	10.9886	11.3155	NO	NO
20 uM Staurosporine vs. DMSO	ALYALQDIVSR	0.362549	2.34504	PCM1	Pericentriolar material 1 protein	Q15154	1422	15.2378	15.4152	15.1223	15.2425	15.6811	15.6711	15.4382	15.6775	NO	NO
20 uM Staurosporine vs. DMSO	STGSTYGFLQPLTR	0.262484	2.34221	ZNF318	Zinc finger protein 318	Q5VUA4	1666	15.6239	15.7079	15.762	15.5576	15.9501	15.9424	15.9373	15.8714	NO	NO
20 uM Staurosporine vs. DMSO	LTECQLK	1.3949	2.34147	ADAR	Double-stranded RNA-specific adenosine deaminase	P55265	496	13.9238	15.2096	15.2626	13.724	16.0473	16.0119	15.7956	15.8448	NO	NO
20 uM Staurosporine vs. DMSO	SEYDRGVNTFSPEGR	-3.17726	2.34119	PSMA5	Proteasome subunit alpha type-5	P28066	6	11.2985	12.0297	13.697	11.6209	6.92445	9.34286	10.4288	9.24087	NO	NO
20 uM Staurosporine vs. DMSO	VLELQGLGWEGQEAEK	-4.36591	2.34077	FBXL12	F-box/LRR-repeat protein 12	Q9NXK8	286	14.1703	17.7798	17.8268	14.583	13.2619	9.31525	12.5435	11.7755	NO	NO
20 uM Staurosporine vs. DMSO	DMVVDIQRR	-0.938026	2.33835	NUDC	Nuclear migration protein nudC	Q9Y266	197	14.5046	14.2121	14.1509	14.2931	14.0816	13.1486	13.0341	13.1442	NO	NO
20 uM Staurosporine vs. DMSO	AYHEQLSVAEITNACFEPANQMVKCDPR	-0.357875	2.3324	TUBA1B	Tubulin alpha-1B chain	P68363	281	17.8056	17.4688	17.5044	17.578	17.1809	17.2163	17.4098	17.1183	NO	NO
20 uM Staurosporine vs. DMSO	KSGNYFFLDD	0.230942	2.32988	ABCE1	ATP-binding cassette sub-family E member 1	P61221	590	17.0041	17.1455	17.0497	17.1133	17.3706	17.3659	17.1942	17.3057	NO	NO
20 uM Staurosporine vs. DMSO	VYSPHVLNLTLVDLPGMTK	1.84249	2.32983	DNM1	Dynamin-1	Q05193	124	9.40638	9.42257	10.4737	9.34728	11.3159	10.6166	12.4728	11.6146	NO	NO
20 uM Staurosporine vs. DMSO	AKDDATLSGK	3.53978	2.3281	PDAP1	28 kDa heat- and acid-stable phosphoprotein	Q13442	163	11.7115	8.86625	10.74	13.8588	14.1916	14.9333	15.0716	15.1392	NO	NO
20 uM Staurosporine vs. DMSO	AGFQSVAPSGGAGASGGAGAAAALGPGGTPGPPVR	-0.905509	2.32707	SMARCD1	SWI/SNF-related matrix-associated actin-dependent regulator of chromatin subfamily D member 1	Q96GM5	5	15.1561	14.5247	14.2208	14.6035	13.59	13.3213	13.9648	14.0068	NO	NO
20 uM Staurosporine vs. DMSO	QVEPLDPPAGSAPGEHVFVK	-0.285426	2.32573	YARS1	Tyrosine--tRNA ligase, cytoplasmic	P54577	451	19.6323	19.4526	19.2953	19.3519	19.2136	19.1269	19.1314	19.1184	NO	NO
20 uM Staurosporine vs. DMSO	AAQFEPPGR	-3.59314	2.32198	FCGR2A	Low affinity immunoglobulin gamma Fc region receptor II-a;Low affinity immunoglobulin gamma Fc region receptor II-c	P12318	256	14.4539	14.7806	15.0328	14.6164	10.8352	10.9372	13.9735	8.76522	NO	NO
20 uM Staurosporine vs. DMSO	SLYRNILMYGPPGTGK	6.18733	2.32166	ATAD3A	ATPase family AAA domain-containing protein 3A	Q9NVI7	391	9.67815	9.57616	10.5602	9.47418	10.5873	18.5414	18.2992	16.6101	NO	NO
20 uM Staurosporine vs. DMSO	TEAPAPASSTPQEPWPGPTAPSPTSRPPWAVDPAFAER	-0.359377	2.31985	PDLIM7	PDZ and LIM domain protein 7	Q9NR12	196	16.3207	16.0213	15.9102	15.997	15.7171	15.7202	15.719	15.6552	NO	NO
20 uM Staurosporine vs. DMSO	AMSGLEGPLTK	0.207433	2.31841	RBM27	RNA-binding protein 27	Q9P2N5	564	16.5881	16.6005	16.6169	16.5688	16.7633	16.8304	16.8857	16.7247	NO	NO
20 uM Staurosporine vs. DMSO	DGNASGTTLLEALDCILPPTRPTDKPLR	-0.38206	2.31337	EEF1A1	Elongation factor 1-alpha 1	P68104	220	20.3296	20.2253	20.2287	20.5613	19.7377	19.9568	20.0505	20.0717	NO	NO
20 uM Staurosporine vs. DMSO	DYEEIGPSICR	0.858044	2.31284	ACTR3	Actin-related protein 3	P61158	399	12.5054	13.1921	13.53	12.9785	14.0579	13.845	13.9511	13.7841	NO	NO
20 uM Staurosporine vs. DMSO	HFVDSHHQKPVNAIIEHVRDGSVVR	-0.70952	2.30852	SND1	Staphylococcal nuclease domain-containing protein 1	Q7KZF4	185	14.7313	14.2951	14.1766	14.6198	14.0239	13.7784	13.8061	13.3763	NO	NO
20 uM Staurosporine vs. DMSO	VNLAKPMR	0.305269	2.30839	PPIE	Peptidyl-prolyl cis-trans isomerase E	Q9UNP9	79	15.3778	15.4189	15.4852	15.2215	15.6722	15.5926	15.7148	15.7449	NO	NO
20 uM Staurosporine vs. DMSO	QVYIPTYTKPNPNQIISVGSKPGMNGAGFQK	-0.574643	2.30409	MTA2	Metastasis-associated protein MTA2	O94776	333	14.4871	14.127	14.1495	14.2707	13.6648	13.9771	13.6239	13.4699	NO	NO
20 uM Staurosporine vs. DMSO	HECAEALGAIARPACLAALQAHADDPER	-0.503037	2.30336	DOHH	Deoxyhypusine hydroxylase	Q9BU89	240	13.9345	13.8051	13.6474	13.8147	13.3404	13.1574	13.3163	13.3755	NO	NO
20 uM Staurosporine vs. DMSO	TDQVIQSLIALVNDPQPEHPLRADLAEEYSKDR	-0.625269	2.30081	UBE2L3	Ubiquitin-conjugating enzyme E2 L3	P68036	101	16.456	15.8606	15.7042	16.2051	15.4563	15.3925	15.5918	15.2842	NO	NO
20 uM Staurosporine vs. DMSO	DFIILSCVR	1.50977	2.29607	UPF1	Regulator of nonsense transcripts 1	Q92900	846	9.22164	9.11965	8.62613	9.01766	10.9228	10.6951	9.60913	10.7971	NO	NO
20 uM Staurosporine vs. DMSO	TAPVQAPPAPVIVTETPEPAMTSGVYRPPGAR	-0.371116	2.29302	CDV3	Protein CDV3 homolog	Q9UKY7	144	16.9104	16.6893	16.6225	16.742	16.2212	16.2656	16.5772	16.4157	NO	NO
20 uM Staurosporine vs. DMSO	QYPDSPHPVPHR	2.50588	2.28797	RPRD2	Regulation of nuclear pre-mRNA domain-containing protein 2	Q5VT52	961	11.73	12.5971	15.0422	11.9706	15.4774	15.0946	15.5526	15.2389	NO	NO
20 uM Staurosporine vs. DMSO	VSLPPIPAVSNIK	0.248392	2.28759	UBAP1	Ubiquitin-associated protein 1	Q9NZ09	252	16.9288	16.9936	16.9365	17.0442	17.0664	17.2494	17.2825	17.2983	NO	NO
20 uM Staurosporine vs. DMSO	VQQVQPAMQAVIR	0.281106	2.28415	NIBAN2	Protein Niban 2	Q96TA1	294	15.5082	15.6255	15.4265	15.4261	15.8682	15.7218	15.7357	15.785	NO	NO
20 uM Staurosporine vs. DMSO	HSPAPPPDPGFPAPSPPPADSPSEGFSLK	-1.53435	2.28372	ARHGEF18	Rho guanine nucleotide exchange factor 18	Q6ZSZ5	1298	12.4882	12.6362	11.4181	13.042	11.1126	10.2485	11.0139	11.0721	NO	NO
20 uM Staurosporine vs. DMSO	LLVQTSVQAKPGHVSPLQLTNIQVPQQALPTQR	-1.0706	2.2824	RFX1	MHC class II regulatory factor RFX1	P22670	145	14.4015	13.7044	13.5491	13.936	12.5667	12.3288	13.3606	13.0524	NO	NO
20 uM Staurosporine vs. DMSO	CSLGIFLPR	0.571068	2.27896	KNL1	Kinetochore scaffold 1	Q8NG31	1674	13.1481	13.23	13.3448	13.2407	13.4957	13.944	13.875	13.9333	NO	NO
20 uM Staurosporine vs. DMSO	YNNFFQDLAWR	1.16908	2.27778	PACS2	Phosphofurin acidic cluster sorting protein 2	Q86VP3	605	11.4336	10.7177	11.0997	11.8989	12.4526	12.7542	12.405	12.2145	NO	NO
20 uM Staurosporine vs. DMSO	KKPVFQPVHPIQPIQMPAFTTVQRK	1.31443	2.2756	CNOT10	CCR4-NOT transcription complex subunit 10	Q9H9A5	720	10.5768	11.7725	10.7717	11.3527	11.9597	12.3893	12.8258	12.5566	NO	NO
20 uM Staurosporine vs. DMSO	IVSGEAESVEVTPENLQDFVGKPVFTVER	-0.465112	2.2733	LONP1	Lon protease homolog, mitochondrial	P36776	727	15.1692	14.9856	14.7684	15.037	14.3749	14.4275	14.7421	14.5552	NO	NO
20 uM Staurosporine vs. DMSO	AEPWGNELASAAAR	0.958793	2.27158	CDKN2C	Cyclin-dependent kinase 4 inhibitor C	P42773	2	13.7457	13.4158	13.1072	12.839	14.765	13.9807	13.9591	14.238	NO	NO
20 uM Staurosporine vs. DMSO	NVTELNEPLSNEERNLLSVAYK	-0.30524	2.2693	YWHAG	14-3-3 protein gamma	P61981	29	15.1289	15.1461	15.0548	15.2878	14.8007	14.8395	14.8482	14.9082	NO	NO
20 uM Staurosporine vs. DMSO	MMEIMTR	0.242117	2.26289	RPS3A	Small ribosomal subunit protein eS1	P61247	168	20.782	20.8073	20.7886	20.5617	21.0501	20.9508	20.9779	20.9292	NO	NO
20 uM Staurosporine vs. DMSO	ILSLCPEIK	0.28128	2.26283	PLPBP	Pyridoxal phosphate homeostasis protein	O94903	82	16.5504	16.6239	16.4464	16.3563	16.7688	16.8559	16.6692	16.8082	NO	NO
20 uM Staurosporine vs. DMSO	ERDELQR	2.69875	2.2608	CEP135	Centrosomal protein of 135 kDa	Q66GS9	504	10.0744	13.6351	10.9564	10.3772	13.6336	14.1771	14.0001	14.0272	NO	NO
20 uM Staurosporine vs. DMSO	RWNFEQISFPNMASDSR	1.89685	2.2608	TSEN54	tRNA-splicing endonuclease subunit Sen54	Q7Z6J9	295	9.05334	8.95136	10.8537	8.84937	11.5409	10.8634	11.3136	11.5772	NO	NO
20 uM Staurosporine vs. DMSO	ASPATQPPPLLPPSATGPDATVGGPAPTPLLPPSATASVK	-0.685229	2.26057	KHDRBS1	KH domain-containing, RNA-binding, signal transduction-associated protein 1	Q07666	57	16.8614	16.059	16.2873	16.5848	15.9303	15.8633	15.4447	15.8133	NO	NO
20 uM Staurosporine vs. DMSO	NYIVVDER	-5.2258	2.2585	MYO18A	Unconventional myosin-XVIIIa	Q92614	1139	13.8383	20.1021	14.0405	13.371	10.5112	10.4092	9.2212	10.3072	NO	NO
20 uM Staurosporine vs. DMSO	TAGPLESSETEEASQLK	-1.52199	2.25826	RRBP1	Ribosome-binding protein 1	Q9P2E9	1334	10.8469	11.8195	11.0574	11.5825	9.93551	10.1919	8.95151	10.1395	NO	NO
20 uM Staurosporine vs. DMSO	LFSTGLAHR	-3.04556	2.25723	DDX51	ATP-dependent RNA helicase DDX51	Q8N8A6	451	12.8801	13.4881	12.8767	13.2327	12.6687	8.7789	9.96688	8.88089	NO	NO
20 uM Staurosporine vs. DMSO	VLSALSDR	-3.2507	2.25678	TUBGCP6	Gamma-tubulin complex component 6	Q96RT7	683	15.2721	14.1632	13.6579	13.9851	9.98254	10.0845	13.8219	10.1865	NO	NO
20 uM Staurosporine vs. DMSO	VLNSLTQQEKK	0.818524	2.25608	GBF1	Golgi-specific brefeldin A-resistance guanine nucleotide exchange factor 1	Q92538	597	13.2026	12.8103	12.9745	12.7845	13.3483	13.5856	13.901	14.2112	NO	NO
20 uM Staurosporine vs. DMSO	AYHDLCDGSANQLQQLQSQLAHQTEQK	-0.614261	2.25555	MACF1	Microtubule-actin cross-linking factor 1, isoforms 1/2/3/4/5	Q9UPN3	1517	13.8514	13.9354	13.6886	13.6598	13.281	13.4335	12.9109	13.0529	NO	NO
20 uM Staurosporine vs. DMSO	ASALQDMMR	0.589926	2.25426	XPOT	Exportin-T	O43592	475	14.1701	14.9303	14.4926	14.6057	15.2684	15.1495	15.0171	15.1234	NO	NO
20 uM Staurosporine vs. DMSO	CIMDAFIK	1.06146	2.25258	VPS35L	VPS35 endosomal protein-sorting factor-like	Q7Z3J2	588	9.93828	10.3013	10.2985	10.1186	11.3626	10.887	11.2154	11.4375	NO	NO
20 uM Staurosporine vs. DMSO	VNGRPLEMIEPR	0.189949	2.25117	RPS16	Small ribosomal subunit protein uS9	P62249	34	19.3787	19.4902	19.3919	19.4843	19.7268	19.5901	19.5994	19.5887	NO	NO
20 uM Staurosporine vs. DMSO	ISLTSLHSASSNTSLSGHR	0.765173	2.2504	SHKBP1	SH3KBP1-binding protein 1	Q8TBC3	627	12.3202	12.722	12.7653	12.8917	13.1931	13.2539	13.6925	13.6206	NO	NO
20 uM Staurosporine vs. DMSO	YIEIFPSR	-1.94244	2.24979	GRSF1	G-rich sequence factor 1	Q12849	318	12.8199	10.8717	11.8687	10.9737	9.86056	9.96255	8.87656	10.0645	NO	NO
20 uM Staurosporine vs. DMSO	LADDVDLEQVANETHGHVGADLAALCSEAALQAIRK	-2.99158	2.24958	VCP	Transitional endoplasmic reticulum ATPase	P55072	390	11.532	11.1092	9.32023	10.3744	8.95954	7.09276	8.55165	5.76551	NO	NO
20 uM Staurosporine vs. DMSO	LLACIASRPGQCGRADGYVLEGK	-0.325157	2.24767	RPS8	Small ribosomal subunit protein eS8	P62241	171	15.3318	15.159	15.1631	15.2542	14.916	14.7667	15.0252	14.8996	NO	NO
20 uM Staurosporine vs. DMSO	KPLVLCGDLNVAHEEIDLR	-0.512846	2.24696	APEX1	DNA-(apurinic or apyrimidinic site) endonuclease	P27695	203	13.6985	13.8756	13.7574	13.7302	13.2716	13.3597	13.0304	13.3487	NO	NO
20 uM Staurosporine vs. DMSO	NDEELNKLLGK	0.177253	2.245	H2AC11	Histone H2A type 1;Histone H2A type 1-H;Histone H2A type 1-J;Histone H2A.J	P0C0S8	90	18.4712	18.476	18.4472	18.5168	18.6421	18.6401	18.5849	18.753	NO	NO
20 uM Staurosporine vs. DMSO	EALGDAQQSVR	0.39751	2.24313	DNAJC7	DnaJ homolog subfamily C member 7	Q99615	80	15.9261	15.6147	15.488	15.5814	16.184	16.0397	15.9253	16.0511	NO	NO
20 uM Staurosporine vs. DMSO	SDITKLEVDAIVNAANSSLLGGGGVDGCIHR	-0.470403	2.24166	MACROD1	ADP-ribose glycohydrolase MACROD1	Q9BQ69	159	16.6119	16.2041	16.0912	16.3653	15.824	15.7937	16.0635	15.7095	NO	NO
20 uM Staurosporine vs. DMSO	SSCSLIAFNSDRPGVLGIVPLQGQGEDKR	-1.6822	2.24045	CORO7	Coronin-7	P57737	40	10.8851	10.7831	9.49313	10.6811	8.92968	9.03167	8.01862	9.13366	NO	NO
20 uM Staurosporine vs. DMSO	KKLDSLGLCSVSCALEFIPNSK	-0.46637	2.24013	TACO1	Translational activator of cytochrome c oxidase 1	Q9BSH4	244	14.6383	14.5995	14.3502	14.6674	14.1113	13.874	14.1482	14.2563	NO	NO
20 uM Staurosporine vs. DMSO	KGIAFPTSISVNNCVCHFSPLKSDQDYILK	-0.447194	2.23905	PA2G4	Proliferation-associated protein 2G4	Q9UQ80	72	17.6671	17.355	17.1127	17.5045	17.0763	16.789	17.001	16.9843	NO	NO
20 uM Staurosporine vs. DMSO	ISFFLEKENEPPGR	1.37274	2.2386	CDCA5	Sororin	Q96FF9	82	9.13037	9.02838	10.0124	8.92639	10.6844	10.7864	10.2294	10.8884	NO	NO
20 uM Staurosporine vs. DMSO	GMSGLPGDR	-1.8104	2.23715	COL4A4	Collagen alpha-4(IV) chain	P53420	939	10.8789	10.777	12.25	10.675	8.93582	9.03781	10.2258	9.1398	NO	NO
20 uM Staurosporine vs. DMSO	EQPEKEPELQQYVPQLQNNTILR	-0.342824	2.23461	EIF3A	Eukaryotic translation initiation factor 3 subunit A	Q14152	416	18.3335	18.0264	17.8666	18.0797	17.6692	17.7628	17.7455	17.7574	NO	NO
20 uM Staurosporine vs. DMSO	IQELEDLLAK	0.353674	2.23374	LMNB1	Lamin-B1	P20700	321	14.1901	14.1601	14.2668	14.2973	14.4688	14.6298	14.6811	14.5491	NO	NO
20 uM Staurosporine vs. DMSO	VFAMSPEEFGK	0.197817	2.23281	DMTN	Dematin	Q08495	379	16.4299	16.4161	16.3787	16.3566	16.5478	16.598	16.6706	16.5562	NO	NO
20 uM Staurosporine vs. DMSO	SGAGCGPFYLMR	1.28542	2.23103	MED19	Mediator of RNA polymerase II transcription subunit 19	A0JLT2	58	11.3903	11.9376	11.5509	10.8484	13.025	11.965	12.8781	13.0008	NO	NO
20 uM Staurosporine vs. DMSO	VPVPDER	0.432345	2.23085	OLA1	Obg-like ATPase 1	Q9NTK5	64	15.0282	15.1435	15.4997	15.1504	15.7495	15.7118	15.6033	15.4865	NO	NO
20 uM Staurosporine vs. DMSO	FMATNDLMTELQK	0.952951	2.22871	CAND1	Cullin-associated NEDD8-dissociated protein 1	Q86VP6	24	14.4365	13.9624	13.1975	13.6428	14.9903	14.4618	14.85	14.7489	NO	NO
20 uM Staurosporine vs. DMSO	EGEAPAESESLLR	-0.387595	2.2256	ERCC5	DNA excision repair protein ERCC-5	P28715	690	15.0864	14.9323	14.9277	14.795	14.3828	14.5045	14.6503	14.6534	NO	NO
20 uM Staurosporine vs. DMSO	LVKEDEVVSSEK	-1.37506	2.22466	RTN4	Reticulon-4	Q9NQC3	353	10.3868	10.4548	9.74986	10.5568	9.10831	9.00632	8.27624	9.25713	NO	NO
20 uM Staurosporine vs. DMSO	IVSRPEELREDDVGTGAGLLEIKK	-0.506927	2.22386	CCT3	T-complex protein 1 subunit gamma	P49368	331	14.4546	14.1688	14.0232	14.2632	13.6315	13.6198	13.7122	13.9187	NO	NO
20 uM Staurosporine vs. DMSO	TFTMEGVR	0.340966	2.22284	KIF3A	Kinesin-like protein KIF3A	Q9Y496	107	15.7293	16.0503	15.9697	15.7417	16.1572	16.2562	16.3078	16.1337	NO	NO
20 uM Staurosporine vs. DMSO	DAGSGPPATEGSMDTLENVQLKLENMNAQADR	2.00268	2.22237	TSPYL5	Testis-specific Y-encoded-like protein 5	Q86VY4	190	10.3708	10.4728	9.48878	10.5748	13.1568	12.4261	10.7516	12.5833	NO	NO
20 uM Staurosporine vs. DMSO	EANLAASFGK	0.283445	2.22025	DLD	Dihydrolipoyl dehydrogenase, mitochondrial	P09622	496	17.0554	17.0872	17.2189	16.9676	17.2311	17.5013	17.3958	17.3347	NO	NO
20 uM Staurosporine vs. DMSO	RVEELGDLAQAHIQQLSEAAGEDDHFLIR	-0.430953	2.21645	RIMOC1	RAB7A-interacting MON1-CCZ1 complex subunit 1	A6NDU8	11	16.1062	15.6859	15.6454	15.97	15.4474	15.3838	15.535	15.3175	NO	NO
20 uM Staurosporine vs. DMSO	VTGPGAEAVQIVAK	0.839666	2.21613	PHF21A	PHD finger protein 21A	Q96BD5	186	13.2975	13.4834	13.5784	14.3778	14.459	14.4084	14.6253	14.603	NO	NO
20 uM Staurosporine vs. DMSO	GQDGLQNDFLSISEDVPRPPDTVSTGK	-0.462008	2.21332	PUS7	Pseudouridylate synthase 7 homolog	Q96PZ0	43	15.9111	15.6653	15.537	15.7599	15.3061	15.3008	14.9631	15.4554	NO	NO
20 uM Staurosporine vs. DMSO	SVQTFADK	1.7925	2.21294	CAPZB	F-actin-capping protein subunit beta	P47756	245	8.75712	9.26474	10.6524	8.9611	10.8175	11.8171	11.0609	11.1098	NO	NO
20 uM Staurosporine vs. DMSO	KLSQERPGVLLNQFPCENLLTVK	-0.344012	2.21247	TTLL12	Tubulin--tyrosine ligase-like protein 12	Q14166	346	16.4135	16.1678	15.9769	16.2394	15.8685	15.7992	15.8661	15.8877	NO	NO
20 uM Staurosporine vs. DMSO	AFLADPSAFVAAAPVAAATTAAPAAAAAPAKVEAK	-0.648374	2.21246	RPLP0	Large ribosomal subunit protein uL10	P05388	267	14.6728	14.6456	14.2901	14.6791	13.5289	13.835	14.1681	14.1621	NO	NO
20 uM Staurosporine vs. DMSO	KFPTTATK	0.607063	2.2124	PPP1R12A	Protein phosphatase 1 regulatory subunit 12A	O14974	413	13.8683	13.7515	14.1432	13.9373	14.3619	14.8191	14.2262	14.7216	NO	NO
20 uM Staurosporine vs. DMSO	MVEKMVK	-1.85257	2.21172	NAA25	N-alpha-acetyltransferase 25, NatB auxiliary subunit	Q14CX7	180	13.1188	12.4007	13.84	13.1058	11.5355	11.5964	9.909	12.0141	NO	NO
20 uM Staurosporine vs. DMSO	AIVDCGFEHPSEVQHECIPQAILGMDVLCQAK	-0.433486	2.20681	DDX39A	ATP-dependent RNA helicase DDX39A	O00148	58	18.1782	17.6873	17.5782	17.8454	17.3881	17.3603	17.4079	17.3988	NO	NO
20 uM Staurosporine vs. DMSO	RLSSASTGKPPLSVEDDFEK	-1.97294	2.20609	ZC3H11A	Zinc finger CCCH domain-containing protein 11A	O75152	756	11.6669	10.8065	13.1741	11.7594	9.96501	9.42006	10.608	9.52205	NO	NO
20 uM Staurosporine vs. DMSO	LVVWEAAQNGADEGTELASNTHNIAQDLSNK	-0.599711	2.20482	UBAP2	Ubiquitin-associated protein 2	Q5T6F2	212	14.4	13.8734	13.937	14.1646	13.2735	13.4757	13.6956	13.5314	NO	NO
20 uM Staurosporine vs. DMSO	YPNCPTDVR	0.377838	2.20188	ORC4	Origin recognition complex subunit 4	O43929	418	14.0734	13.8853	14.0422	14.1554	14.4114	14.3924	14.365	14.4989	NO	NO
20 uM Staurosporine vs. DMSO	HCKVEVYLTELK	-1.34965	2.19894	USP15	Ubiquitin carboxyl-terminal hydrolase 15	Q9Y4E8	126	11.8736	12.3855	11.8623	11.8389	10.2067	10.4099	11.5701	10.375	NO	NO
20 uM Staurosporine vs. DMSO	AIRDVNVPK	-2.8114	2.19881	DNAH1	Dynein axonemal heavy chain 1	Q9P2D7	1784	14.1742	10.9028	14.3149	13.9946	10.9342	10.8322	9.64426	10.7302	NO	NO
20 uM Staurosporine vs. DMSO	IQELEGQLDK	-0.369834	2.19872	CENPF	Centromere protein F	P49454	20	16.0859	15.9514	15.8551	16.0737	15.8446	15.6099	15.4322	15.6001	NO	NO
20 uM Staurosporine vs. DMSO	TLFDWYR	0.476594	2.19684	FRYL	Protein furry homolog-like	O94915	77	14.3425	14.1181	14.0382	14.3517	14.8626	14.8268	14.5352	14.5324	NO	NO
20 uM Staurosporine vs. DMSO	IDPTVLLGALPLR	1.1548	2.19538	PTPMT1	Phosphatidylglycerophosphatase and protein-tyrosine phosphatase 1	Q8WUK0	41	10.7869	10.5631	11.5502	10.7529	11.6469	12.3173	12.0442	12.2638	NO	NO
20 uM Staurosporine vs. DMSO	MDVHDLFR	0.249684	2.19418	DDX52	Probable ATP-dependent RNA helicase DDX52	Q9Y2R4	1	16.142	16.3309	16.3975	16.276	16.4742	16.5404	16.5893	16.5414	NO	NO
20 uM Staurosporine vs. DMSO	DGLTDVYNK	0.386086	2.19115	ACAT1	Acetyl-CoA acetyltransferase, mitochondrial	P24752	182	14.5638	14.6554	14.4087	14.2587	14.8486	14.8798	14.8648	14.8377	NO	NO
20 uM Staurosporine vs. DMSO	NTDYNNSPFHISQCFVLK	-1.09335	2.18883	NISCH	Nischarin	Q9Y2I1	1211	12.1045	11.8728	11.9147	11.7493	10.5232	10.5924	10.6846	11.4678	NO	NO
20 uM Staurosporine vs. DMSO	ELQKGEVPK	2.38594	2.1876	TPX2	Targeting protein for Xklp2	Q9ULW0	557	10.3375	9.51203	12.6023	9.60317	12.9773	12.6355	12.8538	13.1321	NO	NO
20 uM Staurosporine vs. DMSO	ERYGTLTGELHMIELEK	0.604887	2.18744	MPDZ	Multiple PDZ domain protein	O75970	1339	13.2536	12.9137	13.5659	13.3107	13.768	13.9619	13.8071	13.9265	NO	NO
20 uM Staurosporine vs. DMSO	YIIEELNVRK	2.31454	2.1866	IARS1	Isoleucine--tRNA ligase, cytoplasmic	P41252	869	13.9745	12.1567	11.5707	10.5011	14.3577	14.5433	14.2674	14.2927	NO	NO
20 uM Staurosporine vs. DMSO	VAGVVAPTLPREDLEK	-0.707671	2.18525	RECQL	ATP-dependent DNA helicase Q1	P46063	529	13.3066	13.4496	13.5955	13.7423	12.5708	12.7155	13.2115	12.7654	NO	NO
20 uM Staurosporine vs. DMSO	VTVITKHNDDEQYAWESSAGGSFTVR	-0.378468	2.18458	HSP90AA1	Heat shock protein HSP 90-alpha	P07900	148	15.1061	15.0451	14.8544	15.092	14.8496	14.5764	14.5965	14.5612	NO	NO
20 uM Staurosporine vs. DMSO	VASQGEVVR	0.309072	2.18404	EPRS1	Bifunctional glutamate/proline--tRNA ligase	P07814	908	18.2042	17.9145	17.9418	18.1307	18.494	18.3146	18.2292	18.3897	NO	NO
20 uM Staurosporine vs. DMSO	DQYATVTHNVHEEK	1.3064	2.184	SAGE1	Sarcoma antigen 1	Q9NXZ1	573	9.03884	9.70337	8.71937	9.80536	10.5293	10.5436	10.8437	10.576	NO	NO
20 uM Staurosporine vs. DMSO	SAIQNLHSFDPFADASKGDDLLPAGTEDYIHIR	-0.371063	2.18184	EIF1	Eukaryotic translation initiation factor 1	P41567	2	16.6982	16.3364	16.3322	16.6252	16.1746	16.0016	16.2139	16.1177	NO	NO
20 uM Staurosporine vs. DMSO	NAQHVEVESIPLPDMPHAPSNILIQDIPLPGAQPPSILKK	-0.81569	2.18098	WBP11	WW domain-binding protein 11	Q9Y2W2	130	14.7892	13.9115	13.9152	14.1265	13.3664	13.3455	13.6441	13.1237	NO	NO
20 uM Staurosporine vs. DMSO	VGSIPANAADDGQWSQGLISAAR	-2.35829	2.18008	TLN2	Talin-2	Q9Y4G6	2377	15.4447	13.9565	13.8407	13.9939	12.3142	10.1483	13.1793	12.1609	NO	NO
20 uM Staurosporine vs. DMSO	VQAELDETK	0.177156	2.17978	YKT6	Synaptobrevin homolog YKT6	O15498	142	18.3161	18.2404	18.4272	18.2896	18.4838	18.49	18.5064	18.5017	NO	NO
20 uM Staurosporine vs. DMSO	IEEVVER	1.2345	2.17314	ALDH1B1	Aldehyde dehydrogenase X, mitochondrial	P30837	430	13.0941	12.5397	14.1311	12.7458	14.4979	14.5219	14.4866	13.9422	NO	NO
20 uM Staurosporine vs. DMSO	TYHALCNEEFTIFNRVDISR	-1.54296	2.17116	STAG2	Cohesin subunit SA-2	Q8N3U4	635	11.9769	12.5747	12.382	11.7764	9.69656	11.4099	10.3408	11.0908	NO	NO
20 uM Staurosporine vs. DMSO	LCLIQPFIDLR	-1.4463	2.16982	MOCOS	Molybdenum cofactor sulfurase	Q96EN8	634	10.9604	10.8584	10.2232	10.7564	8.85434	8.95633	10.1443	9.05832	NO	NO
20 uM Staurosporine vs. DMSO	RAEVNGLAAQGKYEGSGEDGGAAAQSLYIANHAY	-0.436028	2.16891	ALDOC	Fructose-bisphosphate aldolase C	P09972	331	15.6427	15.5538	15.2241	15.3278	15.2116	14.8815	14.9489	14.9623	NO	NO
20 uM Staurosporine vs. DMSO	FVFDAVFDETSTQSEVFEHTTKPILR	-1.13362	2.16562	KIF18A	Kinesin-like protein KIF18A	Q8NI77	74	11.3123	11.2124	11.2547	11.4281	9.57173	10.4032	10.5509	10.1472	NO	NO
20 uM Staurosporine vs. DMSO	AGDELTKMEDEDEQGWCK	-1.37413	2.16517	PACSIN2	Protein kinase C and casein kinase substrate in neurons protein 2	Q9UNF0	449	10.8319	11.1015	11.1148	11.0007	10.564	9.43676	9.16506	9.3866	NO	NO
20 uM Staurosporine vs. DMSO	VHIEFTEGEDKITLEGPTEDVNVAQEQIEGMVK	-2.66461	2.16511	HDLBP	Vigilin	Q00341	397	14.6341	12.9237	12.6779	13.382	9.71058	12.5179	11.2691	9.46166	NO	NO
20 uM Staurosporine vs. DMSO	NPPGFAFVEFEDPRDAADAVR	-0.220049	2.16384	SRSF3	Serine/arginine-rich splicing factor 3	P84103	44	18.7255	18.768	18.5158	18.7033	18.4459	18.4472	18.4257	18.5136	NO	NO
20 uM Staurosporine vs. DMSO	DKSGIDSLDHVTSDAVELANR	-2.03892	2.16342	TAF1D	TATA box-binding protein-associated factor RNA polymerase I subunit D	Q9H5J8	2	10.8463	12.6207	12.3396	10.5387	9.3779	9.27591	10.3619	9.17392	NO	NO
20 uM Staurosporine vs. DMSO	QQLEAEVELK	-0.975444	2.162	CAMSAP1	Calmodulin-regulated spectrin-associated protein 1	Q5T5Y3	1306	10.8643	10.7115	10.6984	10.8134	9.70031	9.8023	9.77892	9.90429	NO	NO
20 uM Staurosporine vs. DMSO	QYALDRMQFGVPLAR	1.36598	2.16176	GCDH	Glutaryl-CoA dehydrogenase, mitochondrial	Q92947	314	9.8892	10.1394	8.84943	10.0374	10.851	11.428	11.0471	11.0533	NO	NO
20 uM Staurosporine vs. DMSO	LGEWVGLCK	0.236589	2.16169	RPS12	Small ribosomal subunit protein eS12	P25398	85	19.641	19.6993	19.8965	19.8311	20.0499	20.0144	19.9137	20.0363	NO	NO
20 uM Staurosporine vs. DMSO	RHLSEGTNSYATR	-0.710411	2.16064	MORC3	MORC family CW-type zinc finger protein 3	Q14149	511	12.955	12.638	13.2025	13.1201	12.3714	12.144	12.2787	12.2798	NO	NO
20 uM Staurosporine vs. DMSO	GLKYELISETGGSHDKR	-0.188196	2.16021	ILF3	Interleukin enhancer-binding factor 3	Q12906	538	17.7911	17.6797	17.6776	17.8448	17.5619	17.5656	17.5769	17.5361	NO	NO
20 uM Staurosporine vs. DMSO	ILETTTFFQR	0.432665	2.15826	UGGT1	UDP-glucose:glycoprotein glucosyltransferase 1	Q9NYU2	659	14.3852	14.6799	14.4407	14.7758	14.9582	15.1538	14.8542	15.046	NO	NO
20 uM Staurosporine vs. DMSO	EMPNVFGK	0.19954	2.1578	EHD1	EH domain-containing protein 1	Q9H4M9	317	16.3691	16.3541	16.4816	16.395	16.6286	16.5897	16.6448	16.5347	NO	NO
20 uM Staurosporine vs. DMSO	VNFCPLPSEQCYQAPGGPEDRGPAWVGSHGVLQHTQGLPADR	-0.431154	2.15758	TRIP6	Thyroid receptor-interacting protein 6	Q15654	44	17.0208	16.6161	16.4565	16.7558	16.2952	16.1363	16.3781	16.315	NO	NO
20 uM Staurosporine vs. DMSO	EHQLASASELPLGSRPAPQPPVPRPEHCEGAAAGLK	-0.844013	2.15721	ZNRD2	Protein ZNRD2	O60232	98	14.9481	14.278	14.0691	14.3985	13.6836	13.4014	13.9977	13.2349	NO	NO
20 uM Staurosporine vs. DMSO	TFVRDIAK	1.3409	2.15712	TBC1D24	TBC1 domain family member 24	Q9ULP9	271	9.15769	9.0557	9.41954	8.95372	10.6571	10.7591	9.67307	10.8611	NO	NO
20 uM Staurosporine vs. DMSO	LLVTELMR	0.273737	2.15679	HAUS4	HAUS augmin-like complex subunit 4	Q9H6D7	119	15.8742	15.8306	15.8817	15.6598	16.1987	16.0477	16.0865	16.0084	NO	NO
20 uM Staurosporine vs. DMSO	YVLGMQELFR	0.18498	2.15637	THOC3	THO complex subunit 3	Q96J01	34	17.0961	17.1439	17.2202	17.1384	17.3934	17.3552	17.2592	17.3308	NO	NO
20 uM Staurosporine vs. DMSO	SKSDPIMLLK	0.665096	2.15553	PDHA1	Pyruvate dehydrogenase E1 component subunit alpha, somatic form, mitochondrial	P08559	312	13.3982	13.9465	13.3338	13.3777	14.2219	14.2389	13.8699	14.3859	NO	NO
20 uM Staurosporine vs. DMSO	ASCFTGLNPTIVQEYTK	-1.06346	2.1543	SMC5	Structural maintenance of chromosomes protein 5	Q8IY18	879	13.4909	12.6453	12.6985	12.874	11.4066	11.9156	12.3857	11.747	NO	NO
20 uM Staurosporine vs. DMSO	TVLKQEK	-1.67646	2.15126	SKIC3	Superkiller complex protein 3	Q6PGP7	31	10.83	10.728	12.0567	10.626	8.98475	9.08674	10.2747	9.18873	NO	NO
20 uM Staurosporine vs. DMSO	KFQSFQDHK	-0.855364	2.15087	FRG1	Protein FRG1	Q14331	212	13.1801	13.114	13.3783	13.491	12.5153	12.6952	12.6863	11.8452	NO	NO
20 uM Staurosporine vs. DMSO	RINVELSTK	0.363485	2.15001	RBM14	RNA-binding protein 14	Q96PK6	141	16.0106	16.028	15.7107	15.8354	16.3079	16.0533	16.299	16.3785	NO	NO
20 uM Staurosporine vs. DMSO	KAHLMEIQVNGGTVAEKLDWAR	-0.359916	2.1493	RPL3	Large ribosomal subunit protein uL3	P39023	177	17.7288	17.3852	17.5123	17.5177	17.2539	17.0576	17.369	17.0238	NO	NO
20 uM Staurosporine vs. DMSO	EFAAMEAAALK	0.821447	2.14915	WBP4	WW domain-binding protein 4	O75554	64	15.3861	15.3306	16.2794	15.1057	16.257	16.4495	16.2969	16.3843	NO	NO
20 uM Staurosporine vs. DMSO	YIPVEDLQDPR	-0.567427	2.14888	SETD1A	Histone-lysine N-methyltransferase SETD1A	O15047	54	14.8944	14.5947	14.8742	14.9422	14.3754	14.2059	14.5599	13.8946	NO	NO
20 uM Staurosporine vs. DMSO	NLEFQGPLEISR	0.199996	2.14845	VPS37C	Vacuolar protein sorting-associated protein 37C	A5D8V6	53	16.1156	15.9931	16.1274	16.0934	16.3057	16.2959	16.268	16.2597	NO	NO
20 uM Staurosporine vs. DMSO	RSEPFPAPPEDDAATAK	1.97107	2.14635	KATNB1	Katanin p80 WD40 repeat-containing subunit B1	Q9BVA0	399	12.9001	15.2979	13.3951	12.5536	14.9525	15.6415	15.7115	15.7255	NO	NO
20 uM Staurosporine vs. DMSO	GFLNSSELSGLPAGPDREGSLKDQLALAIGK	-0.581897	2.1459	TSFM	Elongation factor Ts, mitochondrial	P43897	162	15.1003	14.7054	14.5175	14.9633	14.021	14.1002	14.4136	14.4243	NO	NO
20 uM Staurosporine vs. DMSO	QHLLKTEK	1.83535	2.13929	ATG4A	Cysteine protease ATG4A	Q8WYN0	35	9.0827	8.98071	7.24287	8.87872	10.7321	10.8341	9.74807	10.2122	NO	NO
20 uM Staurosporine vs. DMSO	EALDHMVEYVAQNTPVTWLVGPFAPGITEKAPEEK	-1.04459	2.13917	PLIN3	Perilipin-3	O60664	399	13.5567	13.0024	12.9758	13.1029	12.3885	11.4265	12.5832	12.0612	NO	NO
20 uM Staurosporine vs. DMSO	FCPSIQGAK	1.62167	2.13887	FBXO30	F-box only protein 30	Q8TB52	569	10.9392	11.9603	9.83861	11.4626	12.2788	12.7746	12.9827	12.6513	NO	NO
20 uM Staurosporine vs. DMSO	LENVLFGPHDCSHAPPDGYPIIPTSGSVPVQK	-0.530438	2.13613	EXOSC10	Exosome complex component 10	Q01780	602	15.8225	15.2133	15.5225	15.7572	14.8808	15.0905	15.2519	14.9707	NO	NO
20 uM Staurosporine vs. DMSO	HHLDLGHNSQAYEALTQIPDSSR	-0.729348	2.1344	NUP160	Nuclear pore complex protein Nup160	Q12769	1007	13.5018	13.3192	13.1467	13.2474	12.7787	12.2845	12.8934	12.3412	NO	NO
20 uM Staurosporine vs. DMSO	LQTAPVPMPDLK	0.171991	2.13316	MAPT	Microtubule-associated protein tau	P10636	560	17.1367	17.0987	17.158	17.025	17.2919	17.2561	17.3028	17.2555	NO	NO
20 uM Staurosporine vs. DMSO	EFVNESVSWR	-0.918971	2.13229	N4BP1	NEDD4-binding protein 1	O75113	727	15.0076	16.2749	16.1982	15.8805	14.9369	14.9159	14.79	15.0425	NO	NO
20 uM Staurosporine vs. DMSO	SEPSAGIPK	0.442435	2.13148	PRRC2C	Protein PRRC2C	Q9Y520	940	15.189	14.9858	14.9815	14.8336	15.5579	15.2738	15.2582	15.6699	NO	NO
20 uM Staurosporine vs. DMSO	EPSAPSIPTPAYQSSPAGGHAPTPPTPAPR	-0.346028	2.13109	PDCD6IP	Programmed cell death 6-interacting protein	Q8WUM4	716	18.1981	17.9153	17.7524	17.8991	17.5176	17.5253	17.7317	17.6061	NO	NO
20 uM Staurosporine vs. DMSO	TQEQCVHNETKNELEK	2.95796	2.13102	OPA1	Dynamin-like 120 kDa protein, mitochondrial	O60313	782	7.37224	7.81618	7.78616	4.26931	10.2856	10.3875	9.30155	9.10109	NO	NO
20 uM Staurosporine vs. DMSO	ASWAAAAER	-1.70785	2.12969	JMY	Junction-mediating and -regulatory protein	Q8N9B5	468	10.8621	10.7601	12.2454	10.6581	8.95266	9.34242	10.2426	9.15663	NO	NO
20 uM Staurosporine vs. DMSO	QVGSHPSFLK	2.72771	2.12711	ZMYM2	Zinc finger MYM-type protein 2	Q9UBW7	504	9.55965	9.66164	13.0997	9.76363	12.8988	13.2433	13.32	13.5333	NO	NO
20 uM Staurosporine vs. DMSO	VLTTGYWPTQSATPK	2.30186	2.12628	CUL3	Cullin-3	Q13618	507	9.85692	9.95891	8.97491	10.0609	13.5465	12.6006	10.5882	11.3238	NO	NO
20 uM Staurosporine vs. DMSO	AIEPPPLDAVIEAEHTLRELDALDANDELTPLGR	-0.824114	2.12516	DHX9	ATP-dependent RNA helicase A	Q08211	820	14.1607	13.522	13.2531	13.7738	12.8988	12.5159	13.0933	12.9053	NO	NO
20 uM Staurosporine vs. DMSO	ESFDPSAFLVPR	-1.45759	2.12513	USP32	Ubiquitin carboxyl-terminal hydrolase 32	Q8NFA0	1304	10.9737	10.8717	10.8352	10.1103	8.84112	8.9431	10.1311	9.04509	NO	NO
20 uM Staurosporine vs. DMSO	SKLDWESFKEEEGIGEELAIHNR	-0.473847	2.12447	CFDP1	Craniofacial development protein 1	Q9UEE9	244	15.3365	15.0377	14.8771	15.1814	14.4117	14.6663	14.8528	14.6064	NO	NO
20 uM Staurosporine vs. DMSO	SKGIAYVEFVDVSSVPLAIGLTGQR	-0.35735	2.123	RBM39	RNA-binding protein 39	Q14498	193	15.8077	15.7923	15.5549	15.7707	15.574	15.2731	15.4186	15.2305	NO	NO
20 uM Staurosporine vs. DMSO	SGLTPLHLVAQEGHVPVADVLIK	-0.333467	2.12142	ANK1	Ankyrin-1	P16157	667	15.9841	15.9549	15.7923	16.056	15.4218	15.5909	15.7528	15.6881	NO	NO
20 uM Staurosporine vs. DMSO	VLELDSVKSEIVPLFTSLASDEQDSVR	-0.56121	2.12058	PPP2R1B	Serine/threonine-protein phosphatase 2A 65 kDa regulatory subunit A beta isoform	P30154	207	13.4684	13.3549	13.2864	13.6221	12.729	12.7782	12.9751	13.0046	NO	NO
20 uM Staurosporine vs. DMSO	GLDIPHVDVVVNFDIPTHSK	-1.29195	2.12034	DDX47	Probable ATP-dependent RNA helicase DDX47	Q9H0S4	326	12.8441	12.3716	11.8065	12.6867	10.6484	11.4078	11.7613	10.7237	NO	NO
20 uM Staurosporine vs. DMSO	LVFHTQLAHGSPTGR	-1.4572	2.12002	GIPC1	PDZ domain-containing protein GIPC1	O14908	58	11.1452	10.809	11.5847	10.87	10.2963	9.5096	8.79313	9.98111	NO	NO
20 uM Staurosporine vs. DMSO	SVSSYGNIR	0.226572	2.11965	RPTOR	Regulatory-associated protein of mTOR	Q8N122	719	15.8414	15.8863	15.9758	16.0344	16.1942	16.1559	16.1807	16.1133	NO	NO
20 uM Staurosporine vs. DMSO	SLSDKEPSSGPEVSEEQALQLVCK	-1.92799	2.1128	UBE4B	Ubiquitin conjugation factor E4 B	O95155	141	13.0466	11.5837	13.0358	13.4131	11.6859	11.2618	9.66675	10.7527	NO	NO
20 uM Staurosporine vs. DMSO	ISAPQER	1.02855	2.11189	ACTR1B	Beta-centractin	P42025	330	13.5483	12.6967	13.5575	14.2334	14.368	14.7218	14.4726	14.5877	NO	NO
20 uM Staurosporine vs. DMSO	MKYILVTGGVISGIGK	0.219374	2.11	CTPS2	CTP synthase 2	Q9NRF8	1	18.0153	18.0048	17.9666	17.8292	18.2812	18.166	18.167	18.0792	NO	NO
20 uM Staurosporine vs. DMSO	TYGFHFTTPALVVEKDAVFIPAGWDNEKK	-0.405614	2.10743	DYNC1LI2	Cytoplasmic dynein 1 light intermediate chain 2	O43237	291	15.0889	14.7616	14.8752	14.9249	14.4975	14.3281	14.7127	14.49	NO	NO
20 uM Staurosporine vs. DMSO	SNGVLPELFQCHGTADELVLHSWAEETNSMLK	-4.91759	2.1074	LYPLAL1	Lysophospholipase-like protein 1	Q5VWZ2	164	17.712	12.2568	12.0836	17.744	10.1999	9.64739	10.7334	9.5454	NO	NO
20 uM Staurosporine vs. DMSO	NHTLALTETGSVFAFGENK	-1.98148	2.10686	RCC2	Protein RCC2	Q9P258	212	12.9389	11.9274	12.938	13.5879	11.9052	11.3422	9.51541	10.7034	NO	NO
20 uM Staurosporine vs. DMSO	LLVSQGASIYIENKEEKTPLQVAK	-0.642806	2.10433	PSMD10	26S proteasome non-ATPase regulatory subunit 10	O75832	190	13.663	13.5401	13.2593	13.5457	12.5915	12.717	13.0934	13.035	NO	NO
20 uM Staurosporine vs. DMSO	GVGGPSQQVMTPQGRGTVAAAAVAATASIAGAPTQYPPGR	-1.47018	2.10374	SNRPN	Small nuclear ribonucleoprotein-associated protein N	P63162	133	15.9812	14.904	14.1321	14.5015	13.0223	14.1925	13.2412	13.1821	NO	NO
20 uM Staurosporine vs. DMSO	ANKTPLRPLDPTRLQGINCGPDFTPSFANLGR	-1.01126	2.10318	EIF4G1	Eukaryotic translation initiation factor 4 gamma 1	Q04637	644	13.844	13.5273	13.0122	13.3134	12.2447	12.5298	12.9904	11.887	NO	NO
20 uM Staurosporine vs. DMSO	DFPGAAGEISAYGPGLVSIAVVQDGDGR	-2.24942	2.10154	EPB41L2	Band 4.1-like protein 2	O43491	566	13.3594	12.1466	11.7581	11.6227	9.49963	9.39764	11.6962	9.29565	NO	NO
20 uM Staurosporine vs. DMSO	RVLLGETGK	0.254709	2.10153	RPS11	Small ribosomal subunit protein uS17	P62280	22	16.0513	16.019	16.1495	16.1013	16.4778	16.3179	16.2005	16.3437	NO	NO
20 uM Staurosporine vs. DMSO	FASEAEDKIREDCCPGKPLNVFR	-0.364969	2.10095	LARS1	Leucine--tRNA ligase, cytoplasmic	Q9P2J5	1040	17.4849	17.1758	16.9605	17.2544	16.8868	16.8006	16.9197	16.8086	NO	NO
20 uM Staurosporine vs. DMSO	LGINSLQELK	0.655945	2.10059	TPD52	Tumor protein D52	P55327	111	13.5396	14.0803	14.3404	14.3917	14.7104	14.8316	14.7024	14.7315	NO	NO
20 uM Staurosporine vs. DMSO	TPGSLGSSASAGQAAASAPLPLESGELSR	-0.60948	2.099	ASPSCR1	Tether containing UBX domain for GLUT4	Q9BZE9	181	16.2432	15.8611	15.5742	15.9902	15.5891	14.9499	15.2932	15.3985	NO	NO
20 uM Staurosporine vs. DMSO	GHQKLEEMVTR	1.1599	2.09702	TSG101	Tumor susceptibility gene 101 protein	Q99816	266	8.93335	9.03534	9.83087	9.13732	10.5508	10.4258	10.3246	10.2754	NO	NO
20 uM Staurosporine vs. DMSO	LNSVQSSERPLFLVHPIEGSTTVFHSLASR	-0.291457	2.09601	FASN	Fatty acid synthase	P49327	2234	16.1155	16.0115	15.8211	16.1654	15.7372	15.7315	15.7317	15.7472	NO	NO
20 uM Staurosporine vs. DMSO	AYHEQLTVAEITNACFEPANQMVK	-0.274957	2.09535	TUBA1C	Tubulin alpha-1C chain	Q9BQE3	281	20.5625	20.2768	20.196	20.2805	20.0873	20.01	20.0977	20.0209	NO	NO
20 uM Staurosporine vs. DMSO	LVLYPSAQEK	0.724692	2.09524	PDE12	2',5'-phosphodiesterase 12	Q6L8Q7	418	13.7968	14.2917	14.6838	13.9385	15.1805	14.928	14.6722	14.8288	NO	NO
20 uM Staurosporine vs. DMSO	HIITTTR	0.396812	2.09507	BPNT1	3'(2'),5'-bisphosphate nucleotidase 1	O95861	190	15.5917	16.0288	16.0922	16.0295	16.2876	16.2773	16.3469	16.4176	NO	NO
20 uM Staurosporine vs. DMSO	GLGSELKDSIPVTELSASGPFESHDLLR	-0.399878	2.09409	POMP	Proteasome maturation protein	Q9Y244	5	16.5726	16.24	16.0341	16.3844	15.8988	15.8009	15.9982	15.9336	NO	NO
20 uM Staurosporine vs. DMSO	RPLEQQQPHHIPTSAPVYQQPQQQPVAQSYGGYKEPAAPVSIQR	-0.534629	2.09365	LASP1	LIM and SH3 domain protein 1	Q14847	154	18.6188	18.1119	18.0112	18.387	17.7296	17.5231	18.0387	17.699	NO	NO
20 uM Staurosporine vs. DMSO	AMGGAVPFK	0.941512	2.09336	PSPH	Phosphoserine phosphatase	P78330	51	14.7537	14.6061	15.9387	15.1199	16.1106	16.2183	16.0176	15.8378	NO	NO
20 uM Staurosporine vs. DMSO	VSASVAEVQEQYTER	-2.76609	2.09273	INF2	Inverted formin-2	Q27J81	854	13.0414	13.1729	9.57152	11.9869	9.00756	8.90557	9.99156	8.80358	NO	NO
20 uM Staurosporine vs. DMSO	EIETNLR	-4.61519	2.09162	UTRN	Utrophin	P46939	1078	15.5195	15.6515	15.7782	15.6945	9.60595	9.50396	15.6711	9.40197	NO	NO
20 uM Staurosporine vs. DMSO	FNPSISMIK	0.284376	2.09147	CUL2	Cullin-2	Q13617	711	14.9839	15.0827	15.229	15.1381	15.2959	15.4344	15.4524	15.3884	NO	NO
20 uM Staurosporine vs. DMSO	SLSEYNNFK	1.23879	2.08995	POLR2A	DNA-directed RNA polymerase II subunit RPB1	P24928	759	12.9756	12.0164	11.7604	11.2375	13.2846	13.0294	13.3157	13.3155	NO	NO
20 uM Staurosporine vs. DMSO	KLSSAMSAAK	2.29694	2.08966	MDH1	Malate dehydrogenase, cytoplasmic	P40925	239	10.2431	12.6275	9.36109	10.4471	13.4111	12.6562	12.46	13.3392	NO	NO
20 uM Staurosporine vs. DMSO	SRPSEAEEVPVSFDQPPEGSHLPCYNK	-0.394618	2.08797	RCSD1	CapZ-interacting protein	Q6JBY9	132	17.6183	17.2325	17.0735	17.3164	16.8271	16.9112	17.0487	16.8751	NO	NO
20 uM Staurosporine vs. DMSO	LKDSEAELQRR	0.331479	2.08747	SEPTIN7	Septin-7	Q16181	372	16.5306	16.2235	16.4643	16.2459	16.5616	16.6492	16.7325	16.8469	NO	NO
20 uM Staurosporine vs. DMSO	LSGFSFK	0.430335	2.08654	MARCKS	Myristoylated alanine-rich C-kinase substrate	P29966	166	13.5813	13.6448	13.4791	13.3924	13.9685	14.0724	13.9449	13.8332	NO	NO
20 uM Staurosporine vs. DMSO	NVCSEAAQKR	0.622324	2.08599	RPE	Ribulose-phosphate 3-epimerase	Q96AT9	215	13.952	13.8759	13.4776	13.8942	14.6083	14.3945	14.0282	14.658	NO	NO
20 uM Staurosporine vs. DMSO	KAQLNIGNVLPVGTMPEGTIVCCLEEKPGDR	-0.557531	2.08154	RPL8	Large ribosomal subunit protein uL2	P62917	93	15.3455	14.832	14.6581	14.9305	14.5328	14.2737	14.5087	14.2208	NO	NO
20 uM Staurosporine vs. DMSO	ILGCELIQAAGILLR	-1.15042	2.08106	CCNL1	Cyclin-L1	Q9UK58	84	11.1744	11.6383	11.728	11.261	10.3727	10.696	10.459	9.67245	NO	NO
20 uM Staurosporine vs. DMSO	MVVESVER	0.5253	2.08099	NAB2	NGFI-A-binding protein 2	Q15742	244	14.0877	14.2754	14.4629	13.7975	14.5787	14.6398	14.7163	14.7899	NO	NO
20 uM Staurosporine vs. DMSO	ALQEGEGDLSISADRLSEKR	-0.601327	2.08077	CARS1	Cysteine--tRNA ligase, cytoplasmic	P49589	296	14.997	14.712	14.253	14.572	13.9525	14.1397	13.8289	14.2076	NO	NO
20 uM Staurosporine vs. DMSO	VFQNEVLGTLQR	0.21053	2.07976	EIF2B5	Translation initiation factor eIF2B subunit epsilon	Q13144	552	16.5193	16.7019	16.5282	16.6053	16.8034	16.8666	16.7475	16.7794	NO	NO
20 uM Staurosporine vs. DMSO	IQIASESSGIPERPCVLTGTPESIEQAKR	-0.478096	2.07803	FUBP3	Far upstream element-binding protein 3	Q96I24	111	15.7089	15.311	15.0936	15.4591	14.7685	14.8863	15.0659	14.9395	NO	NO
20 uM Staurosporine vs. DMSO	ALNHSVEDIEPDLLTPR	-0.47959	2.07646	ZC3H7A	Zinc finger CCCH domain-containing protein 7A	Q8IWR0	196	14.7952	14.5618	14.5516	14.7217	14.2143	14.1772	14.443	13.8774	NO	NO
20 uM Staurosporine vs. DMSO	DCGEWAIPGGMVDPGEK	0.628258	2.0762	NUDT9	ADP-ribose pyrophosphatase, mitochondrial	Q9BW91	206	14.7585	14.3929	14.4636	13.8931	15.2227	14.9429	14.9416	14.9138	NO	NO
20 uM Staurosporine vs. DMSO	TLTPSYYR	-0.934363	2.07593	RAB18	Ras-related protein Rab-18	Q9NP72	72	15.8653	15.219	15.3662	15.0894	13.9337	14.1875	14.5819	15.0994	NO	NO
20 uM Staurosporine vs. DMSO	QIAANMR	-2.97478	2.075	DHX8	ATP-dependent RNA helicase DHX8	Q14562	520	13.8638	14.3429	14.3073	14.6809	13.1879	10.2274	9.1414	12.7391	NO	NO
20 uM Staurosporine vs. DMSO	GDIEKCLTAIVK	0.728406	2.07444	ANXA1	Annexin A1	P04083	258	12.767	13.2162	12.5442	13.34	13.8847	13.6001	13.6031	13.6932	NO	NO
20 uM Staurosporine vs. DMSO	NPVSLPSLPNPTKPNNVPSVPSPSIQR	-1.47063	2.07278	ATF7IP	Activating transcription factor 7-interacting protein 1	Q6VMQ6	831	12.1934	12.872	11.3541	12.8602	10.4411	11.3797	11.1113	10.4651	NO	NO
20 uM Staurosporine vs. DMSO	KGGNCDLSHQER	-1.99863	2.07201	DSN1	Kinetochore-associated protein DSN1 homolog	Q9H410	61	9.34863	9.45062	10.3067	9.55261	8.61717	6.36482	8.50623	7.17581	NO	NO
20 uM Staurosporine vs. DMSO	TQLVLYENALKLEDGDIEEAPGAGGR	-0.735629	2.07125	FHOD1	FH1/FH2 domain-containing protein 1	Q9Y613	325	15.2586	14.6909	14.7676	15.181	14.5054	14.2448	14.4868	13.7186	NO	NO
20 uM Staurosporine vs. DMSO	STLWQEEMR	1.09403	2.07069	MPRIP	Myosin phosphatase Rho-interacting protein	Q6WCQ1	201	12.7198	12.8076	14.0859	12.6631	13.9848	14.1323	14.2337	14.3017	NO	NO
20 uM Staurosporine vs. DMSO	AVKLEPELVEAWNQLGEVYWK	-0.907449	2.07046	TTC5	Tetratricopeptide repeat protein 5	Q8N0Z6	95	12.1707	12.1174	12.521	12.692	11.4717	11.4147	11.8454	11.1396	NO	NO
20 uM Staurosporine vs. DMSO	VKVQSVETVEGCTHEVALPAEEDYLPLKPR	-0.572787	2.07012	MTREX	Exosome RNA helicase MTR4	P42285	99	15.6234	15.105	14.8662	15.3669	14.5982	14.5368	14.8505	14.6848	NO	NO
20 uM Staurosporine vs. DMSO	KESYSIYVYK	0.183165	2.06986	H2BC11	Histone H2B type 1-J	P06899	35	16.3537	16.4811	16.3878	16.3762	16.5999	16.611	16.5409	16.5798	NO	NO
20 uM Staurosporine vs. DMSO	MHAPGKGLSQSALPYRR	-1.03315	2.068	RPS13	Small ribosomal subunit protein uS15	P62277	4	13.5175	13.2461	13.6617	13.7599	12.5157	11.8152	13.2317	12.4899	NO	NO
20 uM Staurosporine vs. DMSO	TWYVQATCATQGTGLYDGLDWLSHELSKR	-1.11522	2.06641	ARF5	ADP-ribosylation factor 5	P84085	152	11.9913	11.641	11.1446	12.1028	10.7912	10.627	10.8141	10.1865	NO	NO
20 uM Staurosporine vs. DMSO	GLLGLPEEETELDNLTEFNTAHNKR	-0.460784	2.06633	PPP1R8	Nuclear inhibitor of protein phosphatase 1	Q12972	152	15.1206	14.7567	14.5762	14.9576	14.3621	14.3653	14.5369	14.3036	NO	NO
20 uM Staurosporine vs. DMSO	AASLEQHLR	1.19338	2.06616	ZNF526	Zinc finger protein 526	Q8TF50	344	10.3218	10.4238	9.43984	10.5258	11.0963	11.5949	11.5763	11.2173	NO	NO
20 uM Staurosporine vs. DMSO	TAMSTPHVAEPAENEQDEQDENGAEASADLRADAMAK	-1.18279	2.06472	MSN	Moesin	P26038	465	10.7382	10.9666	11.2126	11.0141	10.1694	9.61998	10.2037	9.2071	NO	NO
20 uM Staurosporine vs. DMSO	HGLVPFAFVR	0.18437	2.06455	SRSF9	Serine/arginine-rich splicing factor 9	Q13242	49	18.4999	18.5661	18.4716	18.4995	18.6926	18.7505	18.7601	18.5714	NO	NO
20 uM Staurosporine vs. DMSO	YWDLMNLSEK	1.83872	2.06349	GTPBP4	GTP-binding protein 4	Q9BZE4	416	10.1041	10.0021	11.5364	12.348	13.1362	12.799	12.7736	12.6366	NO	NO
20 uM Staurosporine vs. DMSO	ASHSAVDITK	0.333742	2.06341	GPHN	Gephyrin	Q9NQX3	302	14.3955	14.6404	14.6021	14.5405	14.8307	14.7696	15.0022	14.9109	NO	NO
20 uM Staurosporine vs. DMSO	QVEEQSAAANEEVLFPFCR	0.837361	2.06136	CEP170	Centrosomal protein of 170 kDa	Q5SW79	218	12.1523	12.1236	12.194	12.941	13.4641	13.2222	13.0461	13.0278	NO	NO
20 uM Staurosporine vs. DMSO	VSEEVEKGR	3.50691	2.06089	AATF	Protein AATF	Q9NY61	217	15.3298	10.8167	11.1541	10.9187	14.2596	16.109	15.5551	16.3232	NO	NO
20 uM Staurosporine vs. DMSO	QGPPHINHDDPSLVPNVPYFDLPAGLMAPLVK	-0.444005	2.06059	CHERP	Calcium homeostasis endoplasmic reticulum protein	Q8IWX8	629	15.2727	14.8508	15.0277	14.9278	14.5827	14.4559	14.8169	14.4475	NO	NO
20 uM Staurosporine vs. DMSO	HVSINSAR	-2.50729	2.06056	AMBRA1	Activating molecule in BECN1-regulated autophagy protein 1	Q9C0C7	1008	13.4702	10.9221	11.4567	13.0714	8.79063	11.0254	10.0806	8.99461	NO	NO
20 uM Staurosporine vs. DMSO	GISEDSHLESLQDVGQSAAPTFMISPETVTGTGKK	-0.506897	2.06039	MAP4	Microtubule-associated protein 4	P27816	600	15.4714	15.1593	15.2481	15.3644	14.5951	14.6919	15.2126	14.7159	NO	NO
20 uM Staurosporine vs. DMSO	TTGEGTSLRGDINVCIVGDPSTAK	-0.330156	2.05913	MCM6	DNA replication licensing factor MCM6	Q14566	379	16.8034	16.6341	16.4586	16.7295	16.4438	16.1403	16.344	16.377	NO	NO
20 uM Staurosporine vs. DMSO	TITTLYVGGLGDTITETDLR	-1.21555	2.05894	RBM22	Pre-mRNA-splicing factor RBM22	Q9NW64	230	11.9116	11.7128	11.1125	11.6888	10.6705	10.8969	9.77729	10.2187	NO	NO
20 uM Staurosporine vs. DMSO	LVSLYFDTKRYQEALHLGSQLLR	-1.58746	2.05858	PSMD11	26S proteasome non-ATPase regulatory subunit 11	O00231	133	12.026	12.2262	13.3585	12.0093	11.7749	10.9392	10.2695	10.2865	NO	NO
20 uM Staurosporine vs. DMSO	FFHLAFEEEFGR	-0.271024	2.05746	EIF3I	Eukaryotic translation initiation factor 3 subunit I	Q13347	269	17.8473	17.6863	17.4847	17.7834	17.4031	17.4299	17.4765	17.4081	NO	NO
20 uM Staurosporine vs. DMSO	CSIAVDISENLKEK	-1.4783	2.05533	RPP38	Ribonuclease P protein subunit p38	P78345	80	10.6521	10.7541	9.77011	11.128	9.03426	9.84496	8.75897	8.75294	NO	NO
20 uM Staurosporine vs. DMSO	LFSSVTFETVEESKAPR	-0.178984	2.05485	XPO5	Exportin-5	Q9HAV4	577	17.5903	17.5393	17.5038	17.6135	17.4719	17.3607	17.3155	17.3828	NO	NO
20 uM Staurosporine vs. DMSO	KLPVVSSVVK	0.459952	2.04949	ZC3H14	Zinc finger CCCH domain-containing protein 14	Q6PJT7	295	15.9733	15.5356	15.7961	15.5149	16.0262	16.1688	16.4327	16.032	NO	NO
20 uM Staurosporine vs. DMSO	DAEPRPPHGELQYLGQIQHILR	-1.58792	2.0483	TYMS	Thymidylate synthase	P04818	21	11.1696	10.5677	10.2927	10.6477	8.27452	9.94512	9.54605	8.56034	NO	NO
20 uM Staurosporine vs. DMSO	SRQDPGTDRTEDSGLAAGPPEAAGENFAPCSVAPGK	-0.676172	2.04749	FLYWCH2	FLYWCH family member 2	Q96CP2	103	15.1187	14.6675	14.5646	14.5846	13.7458	14.4627	14.188	13.8341	NO	NO
20 uM Staurosporine vs. DMSO	SRTTPFMGIIDK	-3.44312	2.04734	TANC2	Protein TANC2	Q9HCD6	1840	18.1238	15.2043	15.3945	18.1749	11.8178	11.9223	14.1873	15.1976	NO	NO
20 uM Staurosporine vs. DMSO	WVTTASLLDYDTVAGADKFGNICVVR	-2.14603	2.04271	SF3B3	Splicing factor 3B subunit 3	Q15393	1032	13.3484	13.7133	12.6596	13.1996	10.6879	12.4755	9.40828	11.7652	NO	NO
20 uM Staurosporine vs. DMSO	ICPVEFNPNFVAR	0.160654	2.04248	TRMT112	Multifunctional methyltransferase subunit TRM112-like protein	Q9UI30	32	16.9823	17.0223	17.0425	17.0052	17.2414	17.1677	17.1247	17.1612	NO	NO
20 uM Staurosporine vs. DMSO	QLSQATAAATNHTTDNGVGPEEESVDPNQYYK	-0.383549	2.04236	KARS1	Lysine--tRNA ligase	Q15046	47	15.9999	15.7239	15.68	15.9508	15.3212	15.3169	15.6489	15.5332	NO	NO
20 uM Staurosporine vs. DMSO	TALPAGLSATEKADAHEEDELR	-0.990256	2.04229	CCDC93	Coiled-coil domain-containing protein 93	Q567U6	225	12.8979	12.2753	12.6567	12.3773	10.9601	11.7527	11.9395	11.5939	NO	NO
20 uM Staurosporine vs. DMSO	ALQSGQCAGAALDVFTEEPPRDR	-0.307527	2.04175	PHGDH	D-3-phosphoglycerate dehydrogenase	O43175	248	17.6244	17.5332	17.2545	17.6433	17.1322	17.2619	17.2559	17.1752	NO	NO
20 uM Staurosporine vs. DMSO	DTPELVAYPLPQASSSYMHGGNPSGSVVMVSGLHQLK	-0.694374	2.04158	HNRNPLL	Heterogeneous nuclear ribonucleoprotein L-like	Q8WVV9	310	14.722	14.4881	14.0031	14.5448	13.8122	13.9292	13.3129	13.9263	NO	NO
20 uM Staurosporine vs. DMSO	DLDEVLQTHSVFVNVSK	-0.294471	2.03976	SBDS	Ribosome maturation protein SBDS	Q9Y3A5	46	15.5297	15.3806	15.4854	15.6936	15.2924	15.1484	15.2726	15.198	NO	NO
20 uM Staurosporine vs. DMSO	GVLMVGPPGTGK	0.706165	2.03964	KATNA1	Katanin p60 ATPase-containing subunit A1	O75449	244	15.0842	15.7931	15.7226	14.9318	15.9264	15.9667	16.2493	16.214	NO	NO
20 uM Staurosporine vs. DMSO	AAAAPGASPSPGGDAAWSEAGPGPRPLAR	-0.290546	2.03872	MSH6	DNA mismatch repair protein Msh6	P52701	34	17.2988	16.9549	16.9563	17.0755	16.7726	16.6947	16.8421	16.814	NO	NO
20 uM Staurosporine vs. DMSO	RSDPLVK	-2.55512	2.03851	FHIP1B	FHF complex subunit HOOK-interacting protein 1B	Q8N612	848	11.4083	14.3814	12.9817	14.1566	10.7292	10.6272	9.4392	11.9119	NO	NO
20 uM Staurosporine vs. DMSO	FLREQIEK	-1.37461	2.03772	LARP7	La-related protein 7	Q4G0J3	56	13.9931	14.0456	13.4813	14.6898	13.0578	12.6874	13.343	11.6231	NO	NO
20 uM Staurosporine vs. DMSO	VLLNEGANIEDHNENGHTPLMEAASAGHVEVAR	-1.20543	2.03687	ANKHD1	Ankyrin repeat and KH domain-containing protein 1	Q8IWZ3	323	10.5539	9.89509	10.2128	10.3847	8.73274	8.83473	8.99156	9.66573	NO	NO
20 uM Staurosporine vs. DMSO	DMFASVGADGSVR	1.26376	2.03571	DCAF7	DDB1- and CUL4-associated factor 7	P61962	190	11.3321	12.8722	12.943	12.7618	13.8149	14.0356	13.4072	13.7064	NO	NO
20 uM Staurosporine vs. DMSO	VAAAESMPLLLECAR	0.39551	2.03515	IPO5	Importin-5	O00410	721	16.1279	16.2946	15.9586	15.8984	16.7124	16.3577	16.3349	16.4567	NO	NO
20 uM Staurosporine vs. DMSO	SLVESVSSSPNKESNEEEQVWHFLGK	-0.419168	2.03493	PPA2	Inorganic pyrophosphatase 2, mitochondrial	Q9H2U2	309	15.4108	15.0361	15.0059	15.1546	14.7714	14.5253	14.8981	14.736	NO	NO
20 uM Staurosporine vs. DMSO	LCTFILKNPPENSDSGTGKK	-0.514565	2.03229	EIF5	Eukaryotic translation initiation factor 5	P55010	137	13.9803	13.6994	13.5022	13.8421	13.1561	13.1734	13.2704	13.3658	NO	NO
20 uM Staurosporine vs. DMSO	TIVINYAK	0.283695	2.03167	EIF2D	Eukaryotic translation initiation factor 2D	P41214	413	16.6298	16.7601	16.7019	16.5032	16.752	17.0234	17.0161	16.9383	NO	NO
20 uM Staurosporine vs. DMSO	LHYGTDPCTGQPFRFPLVSVR	-0.42853	2.0286	FLAD1	FAD synthase	Q8NFF5	229	15.5121	15.1539	15.1868	15.2617	14.9851	14.5893	15.0111	14.8148	NO	NO
20 uM Staurosporine vs. DMSO	TEHSPFHEHVLGALCSLVTDFPQGVR	-0.673193	2.02765	HSPBP1	Hsp70-binding protein 1	Q9NZL4	283	13.465	13.1448	13.1966	13.253	12.5167	12.3227	12.9945	12.5326	NO	NO
20 uM Staurosporine vs. DMSO	QNYVDLVSSLSPSLESSSQVEPGTDRK	-0.385412	2.02742	ECI2	Enoyl-CoA delta isomerase 2	O75521	109	15.391	15.1131	14.9798	15.1698	14.8338	14.5887	14.8754	14.8141	NO	NO
20 uM Staurosporine vs. DMSO	LGQPPGVR	0.29384	2.02695	PPP6R1	Serine/threonine-protein phosphatase 6 regulatory subunit 1	Q9UPN7	656	17.1828	17.1686	17.368	17.5459	17.6163	17.622	17.5569	17.6453	NO	NO
20 uM Staurosporine vs. DMSO	DLVGMGHHFLPSEPTKWNVEDVYEFIR	-1.70902	2.02685	PHC2	Polyhomeotic-like protein 2	Q8IXK0	778	12.0761	11.4999	11.1502	12.4158	9.598	9.69999	11.3707	9.63724	NO	NO
20 uM Staurosporine vs. DMSO	SYSDPPLK	0.165612	2.02662	HNRNPF	Heterogeneous nuclear ribonucleoprotein F	P52597	193	19.6602	19.5122	19.5522	19.4808	19.7252	19.6847	19.7051	19.7529	NO	NO
20 uM Staurosporine vs. DMSO	AVEGLLDATSGADADLLLR	-0.237561	2.02511	CNOT1	CCR4-NOT transcription complex subunit 1	A5YKK6	1665	15.6356	15.7543	15.6796	15.7701	15.4111	15.4525	15.582	15.4437	NO	NO
20 uM Staurosporine vs. DMSO	KTSFDQDSDVDIFPSDFPTEPPSLPR	-1.3055	2.02465	TOP2B	DNA topoisomerase 2-beta	Q02880	1574	14.9942	14.8305	14.3209	13.7861	13.2745	13.6044	13.6415	12.1893	NO	NO
20 uM Staurosporine vs. DMSO	ILGDINSDFTRVDEDEEIIVK	-1.87442	2.02385	CCZ1B	Vacuolar fusion protein CCZ1 homolog B;Vacuolar fusion protein CCZ1 homolog	P86790	412	12.475	13.5661	13.3871	12.2154	10.6327	10.5307	12.5536	10.4288	NO	NO
20 uM Staurosporine vs. DMSO	AMPLQPSILR	0.195034	2.02207	POLD2	DNA polymerase delta subunit 2	P49005	100	16.3717	16.4944	16.4559	16.3527	16.6495	16.6602	16.5549	16.5903	NO	NO
20 uM Staurosporine vs. DMSO	QINDSANLR	2.08113	2.02109	PUS7L	Pseudouridylate synthase PUS7L	Q9H0K6	402	9.52488	12.3274	10.9168	11.5351	14.0949	12.8629	12.4626	13.2084	NO	NO
20 uM Staurosporine vs. DMSO	IMQNTDPHSQEYVEHLKDEAQVCAIIER	-0.417832	2.01946	EIF3C	Eukaryotic translation initiation factor 3 subunit C	Q99613	458	16.5372	16.11	15.9461	16.1246	15.7214	15.715	15.8809	15.7293	NO	NO
20 uM Staurosporine vs. DMSO	ILDPEKLFFEER	-1.51073	2.01857	AMDHD2	N-acetylglucosamine-6-phosphate deacetylase	Q9Y303	38	9.61494	10.8773	10.9042	10.8775	8.66901	9.05615	9.79456	8.71132	NO	NO
20 uM Staurosporine vs. DMSO	FNGIVEDFNYGTLLR	-0.276945	2.01823	PBDC1	Protein PBDC1	Q9BVG4	108	15.0333	15.1008	15.099	14.9458	14.825	14.7188	14.6903	14.8369	NO	NO
20 uM Staurosporine vs. DMSO	TESTPITAVK	0.183036	2.01802	COPG1	Coatomer subunit gamma-1	Q9Y678	591	17.0333	17.0546	17.2172	17.0705	17.255	17.2767	17.2793	17.2968	NO	NO
20 uM Staurosporine vs. DMSO	DGISSETVTALGMMESPMVSMVSTQLTEFK	-1.64229	2.01782	MED13L	Mediator of RNA polymerase II transcription subunit 13-like	Q71F56	885	12.1726	12.2853	10.3636	11.2933	9.57361	9.87225	10.4349	9.66488	NO	NO
20 uM Staurosporine vs. DMSO	TLDAEVVEKPAKEETVVENATPDYAAGLVSTQK	-1.12612	2.01774	NELFA	Negative elongation factor A	Q9H3P2	277	14.5941	13.5733	13.2154	13.3067	12.7762	12.777	12.5584	12.0735	NO	NO
20 uM Staurosporine vs. DMSO	MLWFQGAIPAAIATAK	1.0978	2.01729	UBXN4	UBX domain-containing protein 4	Q92575	1	10.6485	11.452	11.1238	10.5287	12.381	11.7729	11.6775	12.3127	NO	NO
20 uM Staurosporine vs. DMSO	QHKPSIIFIDEVDSLCGSRNENESEAAR	-0.928781	2.0156	VPS4A	Vacuolar protein sorting-associated protein 4A	Q9UN37	218	14.1265	13.975	13.812	13.9327	12.5365	13.3847	13.6502	12.5597	NO	NO
20 uM Staurosporine vs. DMSO	LRAGAPTGDLPR	1.58855	2.01556	PSMB9	Proteasome subunit beta type-9	P28065	2	9.09363	9.06253	10.4419	8.88966	10.7211	10.7935	10.5549	11.7724	NO	NO
20 uM Staurosporine vs. DMSO	TLAAEMQELR	0.174887	2.01371	CCAR2	Cell cycle and apoptosis regulator protein 2	Q8N163	856	16.846	16.864	16.7945	16.9105	17.0971	16.9723	17.0425	17.0025	NO	NO
20 uM Staurosporine vs. DMSO	AVQTRPVLQPQPGSLNSSIWDGSEVLRR	-0.351586	2.01318	PATL1	Protein PAT1 homolog 1	Q86TB9	107	16.1837	15.8034	15.8344	15.9292	15.7454	15.4597	15.5894	15.5498	NO	NO
20 uM Staurosporine vs. DMSO	IPIICMCNDR	0.708137	2.01308	RFC1	Replication factor C subunit 1	P35251	746	12.3627	12.4085	12.7253	11.9477	13.0817	13.0427	13.1715	12.9809	NO	NO
20 uM Staurosporine vs. DMSO	CMQLTDFILK	0.31674	2.00948	RPL14	Large ribosomal subunit protein eL14	P50914	54	18.9711	18.9084	18.9891	18.5593	19.2037	19.1946	19.1098	19.1867	NO	NO
20 uM Staurosporine vs. DMSO	KGPPTQELDR	-1.98486	2.00839	GSE1	Genetic suppressor element 1	Q14687	1090	12.3398	12.5796	12.8468	11.6797	9.89135	9.78936	12.1384	9.68738	NO	NO
20 uM Staurosporine vs. DMSO	VEEQEPELTSTPNFVVEVIKNDDGKK	-0.759124	2.00787	C1QBP	Complement component 1 Q subcomponent-binding protein, mitochondrial	Q07021	155	15.6261	15.0102	14.4676	14.9937	14.3933	14.0577	14.2281	14.382	NO	NO
20 uM Staurosporine vs. DMSO	MYSNVYYHITSK	-1.39479	2.00249	CHAMP1	Chromosome alignment-maintaining phosphoprotein 1	Q96JM3	73	10.4048	10.5068	11.4622	10.6088	9.55659	8.95429	10.0403	8.8523	NO	NO
20 uM Staurosporine vs. DMSO	LEATAASSVK	0.296993	2.0022	ANLN	Anillin	Q9NQW6	134	15.3173	15.1273	15.1308	15.0054	15.3525	15.5418	15.4439	15.4305	NO	NO
20 uM Staurosporine vs. DMSO	TKVIPAASEEQLLLVELVR	-2.18441	2.00086	DOP1A	Protein dopey-1	Q5JWR5	1846	13.3464	13.403	11.269	13.1603	9.14042	10.799	11.5066	10.9951	NO	NO
20 uM Staurosporine vs. DMSO	EAEDNIR	-0.624087	2.00044	PFDN1	Prefoldin subunit 1	O60925	107	15.963	15.9438	15.5194	15.6677	15.6301	15.1827	14.8162	14.9686	NO	NO
20 uM Staurosporine vs. DMSO	ILEEENSLAEYHSRLDETIQAIANGTLNQPLTK	-1.55599	1.99989	TRIP4	Activating signal cointegrator 1	Q15650	335	10.7587	11.583	10.4449	11.0802	8.56621	10.3062	9.11822	9.65221	NO	NO
20 uM Staurosporine vs. DMSO	ITQSEFDRQAEITR	-0.854777	1.99836	SH3GLB1	Endophilin-B1	Q9Y371	197	12.7151	13.0071	12.9142	13.0621	12.3527	12.3749	11.4651	12.0867	NO	NO
20 uM Staurosporine vs. DMSO	LKTEGNEQMKVENFEAAVHFYGK	-0.311675	1.99648	SGTA	Small glutamine-rich tetratricopeptide repeat-containing protein alpha	O43765	94	15.6732	15.4863	15.3092	15.62	15.1749	15.182	15.2659	15.2192	NO	NO
20 uM Staurosporine vs. DMSO	TFSFAIPLIEKLHGELQDRK	-1.77846	1.99584	DDX21	Nucleolar RNA helicase 2	Q9NR30	237	11.5306	11.4737	10.6171	11.4758	9.0013	8.33985	10.3626	10.2796	NO	NO
20 uM Staurosporine vs. DMSO	RTGPPMGSR	0.659117	1.99547	EIF4H	Eukaryotic translation initiation factor 4H	Q15056	175	12.3987	12.8477	12.4502	12.525	12.877	13.4065	13.2759	13.2986	NO	NO
20 uM Staurosporine vs. DMSO	SQGDSNPAAIPHAAEDIQGDDRWMSQHNR	-0.694246	1.99394	PAFAH1B2	Platelet-activating factor acetylhydrolase IB subunit alpha2	P68402	2	15.5096	15.1522	14.7216	14.9639	14.8096	14.4118	14.2843	14.0647	NO	NO
20 uM Staurosporine vs. DMSO	SVEKIEK	-2.53223	1.99344	COG2	Conserved oligomeric Golgi complex subunit 2	Q14746	139	12.9373	13.4378	12.0768	13.3852	9.89868	9.33183	12.783	9.69471	NO	NO
20 uM Staurosporine vs. DMSO	YRGMGSLDAMEK	2.11695	1.99207	IMPDH1	Inosine-5'-monophosphate dehydrogenase 1	P20839	411	9.1022	9.20419	10.4942	11.9441	11.945	12.4392	12.0543	12.774	NO	NO
20 uM Staurosporine vs. DMSO	GDLENAFLNLVQCIQNKPLYFADR	-0.576442	1.9914	ANXA2	Annexin A2	P07355	250	15.1969	14.8539	14.5245	14.9383	14.6162	14.3167	14.2124	14.0625	NO	NO
20 uM Staurosporine vs. DMSO	VSGGLEVLAEKCPNLTHLNLSGNK	-0.270787	1.99096	ANP32A	Acidic leucine-rich nuclear phosphoprotein 32 family member A	P39687	76	18.7931	18.5264	18.4234	18.7225	18.3449	18.3279	18.3686	18.3408	NO	NO
20 uM Staurosporine vs. DMSO	AVEDISSSR	0.377587	1.99096	BIRC2	Baculoviral IAP repeat-containing protein 2	Q13490	165	15.1243	14.6818	15.0106	14.8142	15.2129	15.234	15.2794	15.4148	NO	NO
20 uM Staurosporine vs. DMSO	IAPCPSQDSLYSDPLDSTSAQAGEGVQR	-1.05072	1.99045	DOK1	Docking protein 1	Q99704	305	13.7669	13.4259	13.2885	14.1629	12.209	12.2064	13.3557	12.6702	NO	NO
20 uM Staurosporine vs. DMSO	SGKLPSGVSAK	0.314527	1.98975	RRP12	RRP12-like protein	Q5JTH9	4	15.3808	15.6945	15.7145	15.5801	15.8449	15.931	16.0345	15.8175	NO	NO
20 uM Staurosporine vs. DMSO	GHGFITPADGGPDIFLHISDVEGEYVPVEGDEVTYK	-1.34803	1.98897	CARHSP1	Calcium-regulated heat-stable protein 1	Q9Y2V2	75	13.8508	13.3272	12.8917	14.2791	11.3342	12.8548	12.4518	12.3159	NO	NO
20 uM Staurosporine vs. DMSO	KVDAETVGR	0.231815	1.98882	UMPS	Uridine 5'-monophosphate synthase	P11172	188	16.3766	16.2624	16.2815	16.4841	16.6432	16.6311	16.5649	16.4926	NO	NO
20 uM Staurosporine vs. DMSO	VNSTANAETQATSAFQTQKPLK	-2.32292	1.98878	RB1	Retinoblastoma-associated protein	P06400	622	11.2676	11.6307	11.6204	11.4138	7.21694	9.22515	10.8803	9.3185	NO	NO
20 uM Staurosporine vs. DMSO	RQQLEEQTVELSTEVQSLYR	-0.438507	1.98872	RAD50	DNA repair protein RAD50	Q92878	884	15.801	15.6398	15.3467	15.6213	14.8817	15.1878	15.2323	15.3529	NO	NO
20 uM Staurosporine vs. DMSO	EGVNASVSSDVQSVFK	4.13603	1.98714	CACTIN	Splicing factor Cactin	Q8WUQ7	392	14.4859	9.46133	13.2385	8.70363	14.6996	15.5557	16.2206	15.9575	NO	NO
20 uM Staurosporine vs. DMSO	QTTSNLGHLNKPSIQALIHGLNR	-0.157485	1.98617	PSMD14	26S proteasome non-ATPase regulatory subunit 14	O00487	176	16.9555	16.8598	16.8738	16.877	16.7047	16.7383	16.7492	16.7439	NO	NO
20 uM Staurosporine vs. DMSO	SWGTEKVDVPKAPGLGLVLER	-0.929752	1.98542	PUS1	Pseudouridylate synthase 1 homolog	Q9Y606	317	13.8059	12.9718	13.3503	12.9332	11.9806	12.0639	12.7384	12.5594	NO	NO
20 uM Staurosporine vs. DMSO	GDDYFNYNVQQTSTNPPLPEPGYFTKPPIAAHASR	-0.340981	1.98437	RANBP2	E3 SUMO-protein ligase RanBP2	P49792	958	16.24	16.1194	16.173	16.2922	15.5795	15.9202	16.022	15.9392	NO	NO
20 uM Staurosporine vs. DMSO	LPSRPADNYDNFVLPELPSVPDTLPTASAGASTSASEDIDFDDLSR	-2.02322	1.98348	IST1	IST1 homolog	P53990	310	11.2182	12.586	10.555	10.2616	8.75157	8.85356	8.66813	10.2545	NO	NO
20 uM Staurosporine vs. DMSO	AVASLPPEQMFELMK	0.47267	1.98267	CSTF2	Cleavage stimulation factor subunit 2	P33240	131	16.5124	17.1782	17.1478	16.9663	17.4853	17.3738	17.3237	17.5126	NO	NO
20 uM Staurosporine vs. DMSO	HCSLQAVPEEIYR	-1.1031	1.98091	SCRIB	Protein scribble homolog	Q14160	21	12.9844	11.7829	12.7329	12.4205	10.9318	11.5734	11.284	11.7192	NO	NO
20 uM Staurosporine vs. DMSO	QLLLTADDRVNPCIGGVILFHETLYQK	-0.32537	1.98032	ALDOA	Fructose-bisphosphate aldolase A	P04075	61	16.4992	16.28	16.0828	16.2301	16.0329	15.9262	16.0142	15.8172	NO	NO
20 uM Staurosporine vs. DMSO	VMAGALEGDIFIGPKAEEHR	-1.54989	1.97963	ACTR1A	Alpha-centractin	P61163	47	10.0197	10.4579	11.4043	11.4165	9.1052	9.00321	10.0892	8.90122	NO	NO
20 uM Staurosporine vs. DMSO	TPTHEMFVGFTPSPVAQPHPSAGLNVDFESVFGNK	-0.590404	1.97754	PICALM	Phosphatidylinositol-binding clathrin assembly protein	Q13492	462	14.5537	14.4605	14.1174	14.627	13.9511	13.7346	14.1812	13.5302	NO	NO
20 uM Staurosporine vs. DMSO	EKTQHLSAAR	-1.14462	1.97508	SPTB	Spectrin beta chain, erythrocytic	P11277	1370	9.52737	9.36282	10.1787	9.20965	8.24463	8.55335	8.42199	8.48011	NO	NO
20 uM Staurosporine vs. DMSO	ELSVQDQPSLSPTSLQNSSSHTTTAK	-1.47391	1.97459	CNOT4	CCR4-NOT transcription complex subunit 4	O95628	422	12.4812	12.6308	13.1186	11.7222	11.6396	11.2885	11.1493	9.97972	NO	NO
20 uM Staurosporine vs. DMSO	LASAFTEEQAVLYNQRVEEISPNIR	-0.340941	1.97456	SRP68	Signal recognition particle subunit SRP68	Q9UHB9	221	15.6319	15.3952	15.2054	15.46	15.0153	15.1768	15.1179	15.0188	NO	NO
20 uM Staurosporine vs. DMSO	ASKPLPPAPAPDEYLVSPITGEKIPASK	-1.08423	1.97453	SF3A1	Splicing factor 3A subunit 1	Q15459	397	16.9605	16.1703	15.6086	16.2358	15.4523	15.6364	14.4676	15.082	NO	NO
20 uM Staurosporine vs. DMSO	QWLQEIDR	3.15581	1.97327	RAB1B	Ras-related protein Rab-1B	Q9H0U4	101	9.42357	9.52555	10.8155	9.62754	13.8971	9.93554	13.6787	14.5042	NO	NO
20 uM Staurosporine vs. DMSO	LHDSVVMVTQESDSSFLVK	0.769079	1.97318	ADISSP	Adipose-secreted signaling protein	Q9GZN8	36	12.4284	12.1686	12.7687	12.4828	13.539	13.1661	12.7832	13.4366	NO	NO
20 uM Staurosporine vs. DMSO	FGLLPLSMTSTR	0.324101	1.97175	COG1	Conserved oligomeric Golgi complex subunit 1	Q8WTW3	911	15.8814	16.0174	15.9528	15.6993	16.0393	16.275	16.3687	16.1643	NO	NO
20 uM Staurosporine vs. DMSO	LGVMTLLPPSR	0.825543	1.97146	PPFIA1	Liprin-alpha-1	Q13136	716	13.0469	12.9471	13.014	12.0763	13.8413	13.5277	13.5906	13.4268	NO	NO
20 uM Staurosporine vs. DMSO	SHGLESVPVLPGSGEAGVSFDLPAQADTLHSANK	-1.00599	1.96837	WASHC2A	WASH complex subunit 2A	Q641Q2	996	15.0338	14.7104	13.7721	14.6941	13.8563	13.0927	13.9257	13.3118	NO	NO
20 uM Staurosporine vs. DMSO	VVSNFMDFDETGVLK	1.37398	1.968	NT5C3A	Cytosolic 5'-nucleotidase 3A	Q9H0P0	226	10.0416	11.8047	11.1491	10.2455	12.0383	12.1189	12.2953	12.2844	NO	NO
20 uM Staurosporine vs. DMSO	VPAILYYVKR	-0.583049	1.96767	PAN2	PAN2-PAN3 deadenylation complex catalytic subunit PAN2	Q504Q3	915	12.9163	13.3203	13.0492	13.0337	12.5773	12.5376	12.5551	12.3171	NO	NO
20 uM Staurosporine vs. DMSO	TGSQGQCTQVR	0.402015	1.96758	RPS28	Small ribosomal subunit protein eS28	P62857	21	17.0654	16.7981	16.6617	16.7497	17.3674	17.1154	16.9849	17.4153	NO	NO
20 uM Staurosporine vs. DMSO	SIFGEDALANVSIEKPIHQGPDAAVTGHIR	-0.423113	1.96735	COPB1	Coatomer subunit beta	P53618	899	17.7909	17.3195	17.2077	17.6674	17.0895	16.9757	17.1442	17.0836	NO	NO
20 uM Staurosporine vs. DMSO	NGTSSGTGKDLVFNTESLPSVDNR	2.40721	1.96722	USP34	Ubiquitin carboxyl-terminal hydrolase 34	Q70CQ2	665	9.9525	7.5803	11.0015	8.78317	10.8819	11.7198	12.059	12.2856	NO	NO
20 uM Staurosporine vs. DMSO	QTLDEPEVPEIFTKK	1.54117	1.96692	ZCCHC8	Zinc finger CCHC domain-containing protein 8	Q6NZY4	576	10.7818	9.07468	10.0587	8.97269	11.5494	11.3274	11.3337	10.8421	NO	NO
20 uM Staurosporine vs. DMSO	LKMPEMNIK	-1.22176	1.96592	AHNAK	Neuroblast differentiation-associated protein AHNAK	Q09666	2567	10.9821	10.8801	11.3939	10.7781	9.61727	9.51528	10.6013	9.41329	NO	NO
20 uM Staurosporine vs. DMSO	MVAVQPTEVVNILNCFTFSK	-1.26148	1.96567	PROSER1	Proline and serine-rich protein 1	Q86XN7	62	12.1936	11.7995	11.5664	11.8132	11.0823	9.95969	11.223	10.0617	NO	NO
20 uM Staurosporine vs. DMSO	STEEAFEVFWR	0.602985	1.96546	KIF23	Kinesin-like protein KIF23	Q02241	272	12.9437	13.6186	13.4549	13.0933	14.0482	13.8997	13.8201	13.7544	NO	NO
20 uM Staurosporine vs. DMSO	LQNELDTLKENNLK	-1.02782	1.96537	CLIP1	CAP-Gly domain-containing linker protein 1	P30622	1119	12.2394	11.8258	11.6376	12.3638	10.9062	10.6969	10.7916	11.5607	NO	NO
20 uM Staurosporine vs. DMSO	AVVTEPAKGEEAFQMSEVDEESGLK	-2.46357	1.96534	ZNF638	Zinc finger protein 638	Q14966	1867	13.0059	12.3016	12.2347	11.6064	8.88235	8.12599	11.2784	11.0076	NO	NO
20 uM Staurosporine vs. DMSO	LHQVNRPLTMR	1.16754	1.96502	GATA1	Erythroid transcription factor	P15976	288	12.4496	12.0488	13.6888	12.6123	14.1104	13.7469	14.1608	13.4516	NO	NO
20 uM Staurosporine vs. DMSO	EIDHIYTQKLIDAMKPFGVFEDEEELNHR	3.01542	1.96432	PAPOLG	Poly(A) polymerase gamma	Q9BWT3	32	9.67672	9.77871	8.79471	9.8807	13.0634	13.9163	13.6324	9.5804	NO	NO
20 uM Staurosporine vs. DMSO	NRDLLSENNR	-3.78807	1.96428	NDE1	Nuclear distribution protein nudE homolog 1	Q9NXR1	61	15.1679	15.3458	15.3335	15.0518	10.5948	10.4928	9.30485	15.3542	NO	NO
20 uM Staurosporine vs. DMSO	IQQDSGCKVQISPDSGGLPER	-0.487233	1.96241	KHSRP	Far upstream element-binding protein 2	Q92945	170	14.6621	14.8542	14.6985	15.0208	13.9842	14.3168	14.5606	14.425	NO	NO
20 uM Staurosporine vs. DMSO	LKWGMEYK	-1.33183	1.9623	SNRPF	Small nuclear ribonucleoprotein F	P62306	23	14.0543	14.278	12.9693	13.7524	13.305	11.8243	11.9466	12.6507	NO	NO
20 uM Staurosporine vs. DMSO	SLVNGMSQHM	0.412956	1.96202	EXOC6	Exocyst complex component 6	Q8TAG9	795	13.9226	14.0638	14.2572	13.7801	14.4374	14.4263	14.4606	14.3512	NO	NO
20 uM Staurosporine vs. DMSO	SSNDHGSLALTPRPQLELAESSPAASFLSSR	-0.304422	1.96171	DPH2	2-(3-amino-3-carboxypropyl)histidine synthase subunit 2	Q9BQC3	425	15.8129	15.6186	15.4781	15.6494	15.3846	15.4065	15.3607	15.1896	NO	NO
20 uM Staurosporine vs. DMSO	YYLQVCQSSGGIPK	-1.28174	1.96155	FANCI	Fanconi anemia group I protein	Q9NVI1	1179	10.9141	10.8121	11.5658	10.7101	9.54929	9.4473	10.5333	9.34531	NO	NO
20 uM Staurosporine vs. DMSO	ANKPISCLAYLSTAVGCLASNAPSAAK	-0.52397	1.96106	HERC1	Probable E3 ubiquitin-protein ligase HERC1	Q15751	3256	16.463	16.3586	16.8364	16.6714	16.397	16.1853	15.8805	15.7708	NO	NO
20 uM Staurosporine vs. DMSO	ETDAHLANPVLPDEVLQEAVPGSIR	-0.412911	1.95985	ERCC2	General transcription and DNA repair factor IIH helicase subunit XPD	P18074	300	15.7417	15.4336	15.2302	15.6611	14.9742	15.188	15.0434	15.2094	NO	NO
20 uM Staurosporine vs. DMSO	TSSDSALHTSVMNPSPQDTYPGPTPPSILPSRR	-1.99317	1.95964	CRTC2	CREB-regulated transcription coactivator 2	Q53ET0	169	13.2569	12.3373	12.2933	12.5621	9.03122	10.5357	12.0816	10.8285	NO	NO
20 uM Staurosporine vs. DMSO	HAVTEAEIQQLKR	-2.03561	1.95913	PPP1R9B	Neurabin-2	Q96SB3	678	13.1329	13.2537	12.7113	11.066	11.6278	9.65985	10.8478	9.88592	NO	NO
20 uM Staurosporine vs. DMSO	LTGGKEITEK	0.553346	1.9586	RFC4	Replication factor C subunit 4	P35249	251	14.5649	13.8404	14.2956	14.4603	14.8043	15.0125	14.67	14.8878	NO	NO
20 uM Staurosporine vs. DMSO	NGVQAMVEFDSVQSAQR	1.43906	1.95815	HNRNPL	Heterogeneous nuclear ribonucleoprotein L	P14866	230	14.9548	12.7946	13.4291	13.9963	15.821	14.8105	15.106	15.1934	NO	NO
20 uM Staurosporine vs. DMSO	NVADDYIHTAACLHSLALEEPTVIKK	-0.376012	1.95696	SNX5	Sorting nexin-5	Q9Y5X3	239	14.908	14.606	14.5388	14.8002	14.3282	14.2114	14.436	14.3734	NO	NO
20 uM Staurosporine vs. DMSO	FMNPFNMPNLYQK	0.20041	1.95685	STIP1	Stress-induced-phosphoprotein 1	P31948	124	18.1543	18.2833	18.2518	18.0346	18.4107	18.3864	18.3349	18.3936	NO	NO
20 uM Staurosporine vs. DMSO	AEPAVPQAPQK	-0.320953	1.95398	MYL6B	Myosin light chain 6B	P14649	36	15.0025	14.9469	14.8909	14.7327	14.5556	14.7103	14.4752	14.5481	NO	NO
20 uM Staurosporine vs. DMSO	LTKNMSGSLYEMVSR	2.86717	1.95334	SSRP1	FACT complex subunit SSRP1	Q08945	302	9.05197	10.8497	9.93398	8.84799	11.1335	14.4151	13.6369	10.9668	NO	NO
20 uM Staurosporine vs. DMSO	QILDSAASLTGSK	0.705538	1.95334	MKI67	Proliferation marker protein Ki-67	P46013	1682	13.3323	13.9659	14.061	13.7189	14.4473	14.0311	14.7026	14.7191	NO	NO
20 uM Staurosporine vs. DMSO	EVSDSLLTSSK	0.142351	1.9532	PLIN2	Perilipin-2	Q99541	365	17.2108	17.2097	17.182	17.1583	17.3103	17.3157	17.3232	17.3811	NO	NO
20 uM Staurosporine vs. DMSO	TNHLVTVEGGWPQFGVGAEICAR	-0.566017	1.95037	PDHB	Pyruvate dehydrogenase E1 component subunit beta, mitochondrial	P11177	286	15.7285	15.3154	15.2365	15.0808	14.7739	14.5933	15.1327	14.5973	NO	NO
20 uM Staurosporine vs. DMSO	VFVVGTEAEACR	0.267368	1.94905	SCAF1	Splicing factor, arginine/serine-rich 19	Q9H7N4	352	14.8379	14.8854	14.6852	14.8956	15.159	15.087	15.0655	15.0621	NO	NO
20 uM Staurosporine vs. DMSO	IREYFGGFGEVESIELPMDNKTNK	-0.319063	1.94882	HNRNPD	Heterogeneous nuclear ribonucleoprotein D0	Q14103	198	16.3088	15.9628	15.9199	16.1837	15.8252	15.7553	15.8233	15.6951	NO	NO
20 uM Staurosporine vs. DMSO	TPSAFPQTPAAPPATLGEGSADTEDR	-1.91798	1.94844	EHMT1	Histone-lysine N-methyltransferase EHMT1	Q9H9B1	164	10.0889	11.0829	9.64448	11.4588	9.72588	7.63106	8.74188	8.50421	NO	NO
20 uM Staurosporine vs. DMSO	HNTPSLLEAALTQEASTPDSQVWPTAPDITR	2.50667	1.9482	EDC4	Enhancer of mRNA-decapping protein 4	Q6P2E9	805	12.0759	11.5195	11.9352	12.2897	14.8397	11.9977	16.0985	14.9111	NO	NO
20 uM Staurosporine vs. DMSO	QYPWGVVQVENENHCDFVK	-1.52507	1.94803	SEPTIN11	Septin-11	Q9NVA2	254	10.5685	10.6705	9.6865	10.7725	8.78071	8.79059	9.87658	8.14987	NO	NO
20 uM Staurosporine vs. DMSO	AASGEAKPK	1.80314	1.94791	H1-4	Histone H1.4	P10412	111	9.28341	9.3854	10.5583	9.48738	10.1777	12.4344	11.3385	11.9765	NO	NO
20 uM Staurosporine vs. DMSO	DILEIGAQWSILRK	-0.760602	1.94612	PSMD8	26S proteasome non-ATPase regulatory subunit 8	P48556	146	13.6304	13.4513	13.2355	13.4279	13.0752	12.1747	12.932	12.5207	NO	NO
20 uM Staurosporine vs. DMSO	TVYNLLSDR	-1.04822	1.94597	RAD18	E3 ubiquitin-protein ligase RAD18	Q9NS91	246	15.2885	14.8405	15.1829	13.8119	13.9055	13.9976	13.6054	13.4225	NO	NO
20 uM Staurosporine vs. DMSO	GFPLLLQEALR	-1.74673	1.94558	KIFC3	Kinesin-like protein KIFC3	Q9BVG8	391	11.7904	10.9288	10.8873	11.815	10.8601	8.9082	9.87614	8.79015	NO	NO
20 uM Staurosporine vs. DMSO	ETVREAEAASIK	0.837662	1.94452	VCL	Vinculin	P18206	1104	12.1176	12.0161	11.9712	12.7571	13.1581	13.2353	12.6166	13.2027	NO	NO
20 uM Staurosporine vs. DMSO	EEATYGVWAER	2.27967	1.94437	TFIP11	Tuftelin-interacting protein 11	Q9UBB9	47	12.3789	9.26583	10.2498	9.16384	11.9256	12.6479	12.8742	12.7295	NO	NO
20 uM Staurosporine vs. DMSO	LLLPWLEAR	0.356687	1.94368	CLTC	Clathrin heavy chain 1	Q00610	857	18.0679	18.042	18.2419	18.2114	18.5668	18.6937	18.1807	18.5488	NO	NO
20 uM Staurosporine vs. DMSO	LMDLLGEGLK	0.381373	1.94264	RARS1	Arginine--tRNA ligase, cytoplasmic	P54136	462	14.4672	14.3946	14.7889	14.4558	15.0178	14.7722	14.9949	14.8471	NO	NO
20 uM Staurosporine vs. DMSO	SLPAGDALYLSFNPPQPSR	0.887658	1.94253	ARHGEF2	Rho guanine nucleotide exchange factor 2	Q92974	886	16.1166	14.7583	15.2161	14.9442	16.1448	15.9246	16.1822	16.3344	NO	NO
20 uM Staurosporine vs. DMSO	WAGLAEMR	0.262629	1.94209	OTULIN	Ubiquitin thioesterase otulin	Q96BN8	199	16.0333	15.9531	15.9471	15.7492	16.2136	16.2782	16.075	16.1665	NO	NO
20 uM Staurosporine vs. DMSO	RQEELQR	-2.43664	1.94169	COA4	Cytochrome c oxidase assembly factor 4 homolog, mitochondrial	Q9NYJ1	72	12.7245	10.4004	13.4482	10.5024	9.16271	9.06072	10.1467	8.95873	NO	NO
20 uM Staurosporine vs. DMSO	MGMPSSLAHR	0.693787	1.94023	PYCR3	Pyrroline-5-carboxylate reductase 3	Q53H96	198	11.9869	12.775	12.2373	12.2719	13.0052	12.9702	13.0412	13.0294	NO	NO
20 uM Staurosporine vs. DMSO	VLPQPTNLATPNTKR	-0.408728	1.93822	PMS2	Mismatch repair endonuclease PMS2	P54278	564	14.4757	14.4234	14.6275	14.2986	14.2137	14.159	13.9335	13.8841	NO	NO
20 uM Staurosporine vs. DMSO	MSSYAFFVQTCR	0.199484	1.93811	HMGB1	High mobility group protein B1	P09429	13	22.0805	21.9804	22.1101	21.9755	22.1103	22.3151	22.2493	22.2698	NO	NO
20 uM Staurosporine vs. DMSO	VLSVAEVAATTATPDGGPR	-0.361265	1.93683	NAA30	N-alpha-acetyltransferase 30	Q147X3	105	15.1944	15.2397	15.1728	15.305	14.7589	14.6438	15.0848	14.9795	NO	NO
20 uM Staurosporine vs. DMSO	YLEESTIR	1.6967	1.93528	AMOTL1	Angiomotin-like protein 1	Q8IY63	691	11.3239	12.644	12.6194	10.6542	12.6572	13.7092	14.1304	13.5315	NO	NO
20 uM Staurosporine vs. DMSO	TCLLIVFSK	-1.86127	1.93509	RHOC	Rho-related GTP-binding protein RhoC	P08134	19	13.2975	12.6551	13.6198	12.7523	12.4409	9.70107	10.9417	11.7959	NO	NO
20 uM Staurosporine vs. DMSO	KEILLEGCAEK	-2.38032	1.93425	TTC33	Tetratricopeptide repeat protein 33	Q6PID6	48	13.815	14.2598	14.7606	13.1933	12.6943	9.81153	10.8975	13.104	NO	NO
20 uM Staurosporine vs. DMSO	QVQSLLELR	0.187224	1.93403	PLCB3	1-phosphatidylinositol 4,5-bisphosphate phosphodiesterase beta-3	Q01970	1038	16.6658	16.5966	16.7501	16.6999	16.7758	16.9207	16.8744	16.8904	NO	NO
20 uM Staurosporine vs. DMSO	VNKHAFSGGRDTIEEHR	-0.412577	1.93379	WARS1	Tryptophan--tRNA ligase, cytoplasmic	P23381	372	14.1198	14.3465	14.5012	14.5756	14.0285	13.9513	14.022	13.8909	NO	NO
20 uM Staurosporine vs. DMSO	GTGLQPGEEELPDIAPPLVTPDEPK	-0.59594	1.93287	USP5	Ubiquitin carboxyl-terminal hydrolase 5	P45974	604	14.9994	14.7038	14.4646	15.1427	14.0707	14.2462	14.039	14.5708	NO	NO
20 uM Staurosporine vs. DMSO	EAMVMANNVYK	0.516274	1.93278	ANAPC7	Anaphase-promoting complex subunit 7	Q9UJX3	391	14.077	14.5712	14.4755	13.9938	14.8396	14.8873	14.8866	14.569	NO	NO
20 uM Staurosporine vs. DMSO	NGTWLQATAATTR	-1.59412	1.93265	DPH7	Diphthine methyltransferase	Q9BTV6	406	13.5139	13.2822	12.9436	13.6706	11.9192	13.162	11.0444	10.9082	NO	NO
20 uM Staurosporine vs. DMSO	GEAACQELLR	1.406	1.93248	NOL3	Nucleolar protein 3	O60936	69	10.7077	10.6057	12.5024	11.1095	12.364	12.9115	12.64	12.6337	NO	NO
20 uM Staurosporine vs. DMSO	LQWTEVDSDSVPAFYR	0.604866	1.93242	CDKN1C	Cyclin-dependent kinase inhibitor 1C	P49918	77	13.3065	13.7033	13.8903	13.8939	13.9232	14.4377	14.4275	14.425	NO	NO
20 uM Staurosporine vs. DMSO	QDSVTKLLTDVQLMK	-2.76829	1.93237	HSF1	Heat shock factor protein 1	Q00613	134	10.6599	13.8497	14.0248	10.8639	9.75079	9.85278	8.76679	9.95476	NO	NO
20 uM Staurosporine vs. DMSO	QLVDTTVELANKVGAAEIISR	-0.33471	1.93203	SF3B1	Splicing factor 3B subunit 1	O75533	832	15.7245	15.6707	15.4687	15.5506	15.4402	15.0519	15.2681	15.3155	NO	NO
20 uM Staurosporine vs. DMSO	TNLEFLQEQFNSIAAHVLHCTDSGFGAR	-0.413478	1.92961	BAG6	Large proline-rich protein BAG6	P46379	837	15.2826	14.8079	15.0443	14.9207	14.7362	14.4617	14.7082	14.4954	NO	NO
20 uM Staurosporine vs. DMSO	KQLQALSSELAQARDETK	-0.780115	1.9295	RDX	Radixin	P35241	526	12.7187	12.2729	12.7302	12.8032	11.693	11.7908	12.2605	11.6603	NO	NO
20 uM Staurosporine vs. DMSO	DAGSRDEKAEAGEAGQATAEAECHR	-0.997433	1.92924	ASMTL	Probable bifunctional dTTP/UTP pyrophosphatase/methyltransferase protein	O95671	252	11.966	11.5718	11.1324	11.5573	10.8739	10.237	10.7465	10.3804	NO	NO
20 uM Staurosporine vs. DMSO	LLIMSATLRVEDFTQNPR	-1.61803	1.92805	DHX37	Probable ATP-dependent RNA helicase DHX37	Q8IY37	404	12.9051	12.2324	12.5119	12.3633	12.0261	10.0745	11.4674	9.97251	NO	NO
20 uM Staurosporine vs. DMSO	LQDLATQLQEK	-0.498018	1.9258	RNF40	E3 ubiquitin-protein ligase BRE1B	O75150	240	15.279	15.1902	15.4601	15.5432	14.4954	14.9365	14.8644	15.1843	NO	NO
20 uM Staurosporine vs. DMSO	IIKPVLTQESATYIAEEYSR	-0.211127	1.92579	MCM3	DNA replication licensing factor MCM3	P25205	577	19.5072	19.3186	19.2035	19.3653	19.1789	19.1164	19.0975	19.1572	NO	NO
20 uM Staurosporine vs. DMSO	DVPKECFPEPHQETGGPQGQDPK	-0.488556	1.92556	HEMGN	Hemogen	Q9BXL5	417	15.3027	15.0105	14.7294	15.029	14.2554	14.5408	14.7507	14.5704	NO	NO
20 uM Staurosporine vs. DMSO	TLMNLGGLAVAR	0.149057	1.9237	TAGLN2	Transgelin-2	P37802	128	17.3647	17.3538	17.3828	17.4095	17.5676	17.5366	17.4485	17.5543	NO	NO
20 uM Staurosporine vs. DMSO	TVFVGNLPVTCNK	0.449063	1.9226	RBM34	RNA-binding protein 34	P42696	186	14.2358	14.7734	14.7048	14.7801	14.9256	15.1502	15.0674	15.1471	NO	NO
20 uM Staurosporine vs. DMSO	MEVEAVCGGAGEVEAQDSDPAPAFSK	-0.55281	1.92257	RFC2	Replication factor C subunit 2	P35250	1	15.5448	14.8643	14.8996	15.0104	14.3477	14.7635	14.5663	14.4303	NO	NO
20 uM Staurosporine vs. DMSO	SLPKVPAK	0.371687	1.92236	NUP214	Nuclear pore complex protein Nup214	P35658	931	13.883	13.9934	13.8232	13.9117	14.1758	14.1277	14.4137	14.3808	NO	NO
20 uM Staurosporine vs. DMSO	IFTPYFNYMHECFER	2.33055	1.92177	SNX27	Sorting nexin-27	Q96L92	502	9.68386	7.4028	6.28289	8.57769	9.59351	10.7003	10.3773	10.5983	NO	NO
20 uM Staurosporine vs. DMSO	SNYNLPMHK	0.140015	1.92077	RPL4	Large ribosomal subunit protein uL4	P36578	275	19.4492	19.3244	19.3353	19.3647	19.5535	19.4818	19.5019	19.4963	NO	NO
20 uM Staurosporine vs. DMSO	KHPDSSVNFAEFSK	0.156293	1.92068	HMGB2	High mobility group protein B2	P26583	30	18.8797	18.7425	18.8544	18.8904	18.9726	19.0082	19.0553	18.956	NO	NO
20 uM Staurosporine vs. DMSO	ELVPSLAEISALSQR	1.59751	1.92058	PLEKHH3	Pleckstrin homology domain-containing family H member 3	Q7Z736	387	9.02564	8.92365	9.90765	8.82167	10.3941	11.2168	9.80513	11.6527	NO	NO
20 uM Staurosporine vs. DMSO	GPQSLFNAPR	-3.37744	1.92002	NOP2	Probable 28S rRNA (cytosine(4447)-C(5))-methyltransferase	P46087	93	16.1431	15.0324	11.8262	14.8436	8.79445	11.3014	12.1399	12.0998	NO	NO
20 uM Staurosporine vs. DMSO	MEALILEPSLYTVK	0.346906	1.91979	COPZ1	Coatomer subunit zeta-1	P61923	1	15.8586	16.0568	16.1027	15.7887	16.2214	16.3683	16.1141	16.4907	NO	NO
20 uM Staurosporine vs. DMSO	YGGSVGSQPPPVAPEPGPVPSSPSQEPPTKR	-0.791693	1.91898	UBXN1	UBX domain-containing protein 1	Q04323	179	15.645	14.6114	14.9521	15.0621	14.4059	13.768	14.4462	14.4836	NO	NO
20 uM Staurosporine vs. DMSO	YAGGVAEYR	-0.456447	1.9188	GMPR2	GMP reductase 2	Q9P2T1	278	14.3762	14.6433	14.918	14.592	14.3494	14.2585	14.0335	14.0624	NO	NO
20 uM Staurosporine vs. DMSO	ERTSSLTQFPPSQSEER	-2.1597	1.91816	RANBP3	Ran-binding protein 3	Q9H6Z4	122	9.76692	12.0576	12.7937	11.0476	8.85777	8.95976	10.1477	9.06174	NO	NO
20 uM Staurosporine vs. DMSO	YFELVER	-2.70306	1.91803	TSC2	Tuberin	P49815	407	14.8738	10.7313	11.5882	12.3616	9.28669	9.38867	10.5767	9.49066	NO	NO
20 uM Staurosporine vs. DMSO	EQAELEAAR	0.731584	1.91553	PLEC	Plectin	Q15149	2100	12.326	11.6276	12.1194	12.0799	12.762	12.8354	12.9527	12.5292	NO	NO
20 uM Staurosporine vs. DMSO	SPLDPDSGLLSCTLPNGFGGQSGPEGER	-0.479491	1.9149	SENP3	Sentrin-specific protease 3	Q9H4L4	232	13.7354	13.6547	13.4932	13.5213	13.0523	12.9348	13.2978	13.2017	NO	NO
20 uM Staurosporine vs. DMSO	ALLDQLMGTAR	0.156279	1.91415	LUC7L	Putative RNA-binding protein Luc7-like 1	Q9NQ29	9	17.9102	17.9003	18.0029	17.8898	18.0105	18.0896	18.1446	18.0835	NO	NO
20 uM Staurosporine vs. DMSO	IGPLGLSPKK	1.59873	1.91352	RPL12	Large ribosomal subunit protein uL11	P30050	32	10.3584	8.77624	10.0662	8.87823	11.6276	10.6849	11.5787	10.5829	NO	NO
20 uM Staurosporine vs. DMSO	AHFLQLR	0.979422	1.91259	RIOX2	Ribosomal oxygenase 2	Q8IUF8	119	13.4186	14.8526	13.7932	13.9004	14.6053	14.8769	15.3733	15.027	NO	NO
20 uM Staurosporine vs. DMSO	FASHCLMNHPDLAK	0.991645	1.91203	PDS5A	Sister chromatid cohesion protein PDS5 homolog A	Q29RF7	346	10.7045	11.1126	10.259	10.4935	11.37	11.8098	11.4021	11.9543	NO	NO
20 uM Staurosporine vs. DMSO	VVLQELR	0.26359	1.91148	UBE2V1	Ubiquitin-conjugating enzyme E2 variant 1	Q13404	119	18.7101	19.0366	18.9956	18.9307	19.1213	19.2993	19.0843	19.2226	NO	NO
20 uM Staurosporine vs. DMSO	RKEVVHTVSLHEIDVINSR	-0.411349	1.91139	RUVBL2	RuvB-like 2	Q9Y230	235	13.9111	13.7737	13.6688	14.0011	13.4703	13.4285	13.4242	13.3863	NO	NO
20 uM Staurosporine vs. DMSO	TKQFIDSNPNQPLVILEMESGASAK	-0.364214	1.91022	AARS1	Alanine--tRNA ligase, cytoplasmic	P49588	845	16.9161	16.5961	16.3712	16.5989	16.3171	16.1306	16.3393	16.2383	NO	NO
20 uM Staurosporine vs. DMSO	GIYYQAEVLGQPIVWITPYAFSHDHPTDVDYR	-1.89464	1.91017	PES1	Pescadillo homolog	O00541	187	11.6822	10.9744	11.8198	12.2021	10.5231	8.75023	10.9744	8.85221	NO	NO
20 uM Staurosporine vs. DMSO	KYTELPHGAISEDQAVGPADIPCDSTGQTST	-0.883311	1.91007	DCTPP1	dCTP pyrophosphatase 1	Q9H773	140	13.4125	13.9251	14.1861	14.5165	12.6013	13.2259	13.3965	13.2831	NO	NO
20 uM Staurosporine vs. DMSO	VVQGLFDNFLR	0.202409	1.9083	CHTF18	Chromosome transmission fidelity protein 18 homolog	Q8WVB6	648	16.8183	16.8501	17.0053	16.9449	17.0769	17.1881	17.0246	17.1386	NO	NO
20 uM Staurosporine vs. DMSO	LLLSASEFQVR	0.603897	1.90789	PRR14L	Protein PRR14L	Q5THK1	1966	13.3363	12.8291	13.1297	13.408	13.8301	14.0454	13.7459	13.4972	NO	NO
20 uM Staurosporine vs. DMSO	NVLSDSRPAMAPGSSHLGAPASTTTAADATPSGSLAR	-0.549472	1.90784	CORO1B	Coronin-1B	Q9BR76	410	16.7572	16.2363	16.0495	16.0396	15.6816	15.5403	15.9775	15.6853	NO	NO
20 uM Staurosporine vs. DMSO	DKPVPLPAPEMTVKQER	1.34733	1.90755	BRD8	Bromodomain-containing protein 8	Q9H0E9	468	9.07696	8.97497	9.95897	8.87298	10.7378	10.8398	9.75381	10.9418	NO	NO
20 uM Staurosporine vs. DMSO	RDEFLGR	0.597512	1.90705	CLPB	Mitochondrial disaggregase	Q9H078	555	12.5316	12.711	13.1389	12.8175	13.5916	13.358	13.4207	13.2188	NO	NO
20 uM Staurosporine vs. DMSO	VPPSSPACVPGR	0.561415	1.90686	PARG	Poly(ADP-ribose) glycohydrolase	Q86W56	50	14.1878	14.1913	14.1287	14.5576	14.8642	15.1884	14.43	14.8286	NO	NO
20 uM Staurosporine vs. DMSO	SLPDLEILKKPISEVTDGAFFDYMAVYR	-1.01506	1.9044	FBXO4	F-box only protein 4	Q9UKT5	117	12.5772	12.3434	11.698	12.2951	11.2443	10.7868	11.7672	11.0552	NO	NO
20 uM Staurosporine vs. DMSO	DLPRPSEVNETILRPLNVEPPLTDLQK	-0.500716	1.90432	CDC5L	Cell division cycle 5-like protein	Q99459	544	14.4222	14.6439	14.2134	14.7394	13.7402	14.0181	14.0535	14.2043	NO	NO
20 uM Staurosporine vs. DMSO	TATGTQPLQPAPVTQPPKEST	-1.70164	1.90384	RABGAP1L	Rab GTPase-activating protein 1-like, isoform 10	B7ZAP0	233	12.2092	10.9658	10.9422	12.8186	9.91087	9.61668	10.8949	9.70689	NO	NO
20 uM Staurosporine vs. DMSO	IEDSTGLNRPGPAPLSSR	-0.654398	1.90353	TCF25	Ribosome quality control complex subunit TCF25	Q9BQ70	157	13.2526	12.9247	13.1975	13.448	12.811	12.6905	12.2444	12.4593	NO	NO
20 uM Staurosporine vs. DMSO	MCEDLWR	0.223194	1.90335	GALE	UDP-glucose 4-epimerase	Q14376	329	16.106	16.0552	15.9569	15.8787	16.1552	16.2502	16.2025	16.2817	NO	NO
20 uM Staurosporine vs. DMSO	DTNAPESFKDTAESR	1.04327	1.90216	TRIP11	Thyroid receptor-interacting protein 11	Q15643	1898	10.948	11.263	10.2517	10.6154	11.6414	12.2616	11.517	11.8311	NO	NO
20 uM Staurosporine vs. DMSO	ALIVEPSRELAEQTLNNIK	-0.237525	1.90114	DDX1	ATP-dependent RNA helicase DDX1	Q92499	289	17.9354	17.8343	17.651	17.7915	17.6618	17.4405	17.5986	17.5611	NO	NO
20 uM Staurosporine vs. DMSO	RQQFGSR	-2.82952	1.90091	METTL2B	tRNA N(3)-methylcytidine methyltransferase METTL2B	Q6P1Q9	17	12.8733	12.5328	12.4049	12.2278	8.734	8.58293	8.75629	12.6474	NO	NO
20 uM Staurosporine vs. DMSO	QLTGGVDVER	1.66595	1.90084	EIF4G3	Eukaryotic translation initiation factor 4 gamma 3	O43432	1179	13.1996	13.2442	11.4747	14.3175	14.4784	14.7747	14.6216	15.0251	NO	NO
20 uM Staurosporine vs. DMSO	VVRVPADLGAEAGLQQLLGALR	-0.3189	1.89979	SPR	Sepiapterin reductase	P35270	63	16.5282	16.2357	16.0787	16.2679	16.0513	15.9936	15.9271	15.8627	NO	NO
20 uM Staurosporine vs. DMSO	LDSPQIR	1.08304	1.8996	SRGAP2	SLIT-ROBO Rho GTPase-activating protein 2	O75044	914	16.6037	15.46	16.7407	15.3759	17.2494	16.8164	17.4929	16.9538	NO	NO
20 uM Staurosporine vs. DMSO	TLPLFYGSIVR	0.34941	1.89955	SMCHD1	Structural maintenance of chromosomes flexible hinge domain-containing protein 1	A6NHR9	620	15.0388	14.6857	15.0416	15.1411	15.2681	15.3955	15.2889	15.3525	NO	NO
20 uM Staurosporine vs. DMSO	GDAHECFVSPVAK	-1.20436	1.89864	MTHFD1L	Monofunctional C1-tetrahydrofolate synthase, mitochondrial	Q6UB35	193	11.9296	12.6196	12.6601	11.6221	11.0015	10.2794	11.3397	11.3935	NO	NO
20 uM Staurosporine vs. DMSO	EVIPISDPELK	0.872587	1.89863	PPP4R3A	Serine/threonine-protein phosphatase 4 regulatory subunit 3A	Q6IN85	248	12.836	12.3166	13.4108	12.3017	13.5604	13.4971	13.4338	13.864	NO	NO
20 uM Staurosporine vs. DMSO	FNIHNNR	0.472064	1.89835	ZFR	Zinc finger RNA-binding protein	Q96KR1	1042	15.7254	15.6761	15.1156	15.3887	15.8518	16.1077	16.0498	15.7848	NO	NO
20 uM Staurosporine vs. DMSO	GTAYTFFTPGNLK	0.198593	1.89683	DDX17	Probable ATP-dependent RNA helicase DDX17	Q92841	516	18.2004	18.2229	18.4051	18.3361	18.5929	18.4585	18.4267	18.4807	NO	NO
20 uM Staurosporine vs. DMSO	GLAVNMVDSK	0.199691	1.89664	DDX19A	ATP-dependent RNA helicase DDX19A	Q9NUU7	436	18.326	18.4671	18.5602	18.3739	18.5511	18.7073	18.6235	18.644	NO	NO
20 uM Staurosporine vs. DMSO	SKKVEEAEPEEFVVEK	0.403836	1.89652	CBX3	Chromobox protein homolog 3	Q13185	19	18.1604	17.9458	17.5783	17.8031	18.0866	18.4348	18.319	18.2625	NO	NO
20 uM Staurosporine vs. DMSO	IIDTGGGFILEEEEEEEQKIGK	-0.60301	1.8953	XPA	DNA repair protein complementing XP-A cells	P23025	68	14.9486	14.4579	14.2451	14.4217	13.7614	14.2096	14.0302	13.66	NO	NO
20 uM Staurosporine vs. DMSO	TLLESCVK	-2.37895	1.89384	URB1	Nucleolar pre-ribosomal-associated protein 1	O60287	1381	12.7561	14.3625	12.6233	12.5061	9.53927	11.8779	11.9798	9.3353	NO	NO
20 uM Staurosporine vs. DMSO	DMPETSFTR	0.216423	1.89362	AFDN	Afadin	P55196	205	15.7235	15.8108	15.7808	15.5913	15.9231	15.938	15.9313	15.9796	NO	NO
20 uM Staurosporine vs. DMSO	NLDECLEGAMVEGDVELLPSDHSVK	-2.09732	1.89316	USP28	Ubiquitin carboxyl-terminal hydrolase 28	Q96RU2	325	12.9103	11.859	12.1367	10.1962	9.03541	8.93342	10.0194	10.7248	NO	NO
20 uM Staurosporine vs. DMSO	FHDPDSAVVAQHLTNTVFVDR	-0.22409	1.89281	SRSF11	Serine/arginine-rich splicing factor 11	Q05519	83	16.6411	16.6959	16.46	16.6642	16.4707	16.4258	16.3283	16.34	NO	NO
20 uM Staurosporine vs. DMSO	AISWTMK	0.218996	1.89275	SAMSN1	SAM domain-containing protein SAMSN-1	Q9NSI8	72	17.0107	16.8391	17.0995	17.1052	17.2761	17.2463	17.1831	17.225	NO	NO
20 uM Staurosporine vs. DMSO	MQNVINTVK	0.214996	1.89242	ATG3	Ubiquitin-like-conjugating enzyme ATG3	Q9NT62	1	17.2197	17.2282	17.1778	17.049	17.4989	17.4001	17.3747	17.2609	NO	NO
20 uM Staurosporine vs. DMSO	QLFTLVEWAK	0.759514	1.89213	RXRA	Retinoic acid receptor RXR-alpha	P19793	275	12.4222	11.8022	12.4056	11.6993	12.8252	12.9151	12.7513	12.8758	NO	NO
20 uM Staurosporine vs. DMSO	DFYELEPEKFQNK	-2.07234	1.89185	PYGB	Glycogen phosphorylase, brain form	P11216	471	13.2606	13.0253	13.1691	12.6392	9.54681	12.143	9.89231	12.2227	NO	NO
20 uM Staurosporine vs. DMSO	IFGGLDMLAEKLPNLTHLNLSGNK	-0.166044	1.89111	ANP32B	Acidic leucine-rich nuclear phosphoprotein 32 family member B	Q92688	76	19.1268	19.0277	19.0688	19.1708	18.9729	18.98	18.8325	18.9446	NO	NO
20 uM Staurosporine vs. DMSO	VLVEITDVDFAALK	1.11096	1.88778	SHCBP1	SHC SH2 domain-binding protein 1	Q8NEM2	126	8.95496	9.62132	9.92204	9.15894	10.5061	10.4041	10.8887	10.3022	NO	NO
20 uM Staurosporine vs. DMSO	ESYSVYVYK	0.139865	1.88773	H2BC5	Histone H2B type 1-D;Histone H2B type 1-C/E/F/G/I;Histone H2B type 2-F;Histone H2B type 1-H;Histone H2B type 1-N;Histone H2B type 1-M	P58876	36	20.825	20.8102	20.8902	20.9058	20.995	21.0429	20.9417	21.0111	NO	NO
20 uM Staurosporine vs. DMSO	YTLAAQDLVMR	2.1557	1.88686	PPM1H	Protein phosphatase 1H	Q9ULR3	467	9.32052	9.42251	10.7125	9.5245	13.1713	10.0386	12.3565	12.0364	NO	NO
20 uM Staurosporine vs. DMSO	EHWLYPQQITTNQWK	1.24115	1.88648	TRMT12	tRNA wybutosine-synthesizing protein 2 homolog	Q53H54	358	8.66062	9.01459	8.84166	9.11658	10.5485	10.4465	9.25853	10.3445	NO	NO
20 uM Staurosporine vs. DMSO	TAVFQEFSHSRR	-1.36203	1.88626	DDX31	Probable ATP-dependent RNA helicase DDX31	Q9H8H2	568	10.3373	10.182	10.6226	11.2411	9.12375	9.02176	10.1078	8.68157	NO	NO
20 uM Staurosporine vs. DMSO	LMELFPANK	0.165889	1.88586	BZW1	eIF5-mimic protein 2	Q7L1Q6	215	18.2312	18.2323	18.356	18.3978	18.45	18.4402	18.5058	18.4849	NO	NO
20 uM Staurosporine vs. DMSO	SAYNVYVAER	0.185617	1.88575	TFAM	Transcription factor A, mitochondrial	Q00059	160	15.965	16.0423	15.9802	16.0185	16.124	16.1627	16.1872	16.2745	NO	NO
20 uM Staurosporine vs. DMSO	LPALQMFMR	0.201367	1.88536	MPP1	55 kDa erythrocyte membrane protein	Q00013	156	19.0198	19.0292	19.1212	18.8357	19.2467	19.1748	19.225	19.1649	NO	NO
20 uM Staurosporine vs. DMSO	VERTDFLSPMCIGEVAHVSAEITYTSK	-1.24625	1.88488	ACOT7	Cytosolic acyl coenzyme A thioester hydrolase	O00154	107	13.9837	13.0734	13.1424	13.3226	13.0631	11.2713	11.9926	12.2101	NO	NO
20 uM Staurosporine vs. DMSO	GSLQPAPAQPPGDPAAQASVSNGEDAGGGAGR	-0.560408	1.88477	UBFD1	Ubiquitin domain-containing protein UBFD1	O14562	52	15.2583	14.9609	14.6324	15.4282	14.3758	14.4173	14.6952	14.55	NO	NO
20 uM Staurosporine vs. DMSO	ARNQLDAVLQCLLEK	1.75963	1.88311	LIN37	Protein lin-37 homolog	Q96GY3	18	8.92225	10.8185	10.1762	8.71828	12.2148	11.398	11.0042	11.0568	NO	NO
20 uM Staurosporine vs. DMSO	HRDFLQEVCLRPSADPIFEPR	-1.3555	1.88196	BAZ2A	Bromodomain adjacent to zinc finger domain protein 2A	Q9UIF9	1472	12.1606	11.1626	10.9438	11.6721	9.52189	10.4575	10.8119	9.72587	NO	NO
20 uM Staurosporine vs. DMSO	VVPCRHDWHQTGGEVTISVYAK	-0.365509	1.88059	CHORDC1	Cysteine and histidine-rich domain-containing protein 1	Q9UHD1	227	14.3392	14.0901	14.2961	14.4101	14.0202	13.8092	13.9403	13.9038	NO	NO
20 uM Staurosporine vs. DMSO	AHLDHIPDYTPPLLTTISPEQESDER	-0.738688	1.88049	CLASRP	CLK4-associating serine/arginine rich protein	Q8N2M8	84	14.7988	14.2497	14.2881	14.6333	13.1462	14.1441	13.8733	13.8515	NO	NO
20 uM Staurosporine vs. DMSO	AATIVATSEGSLWGLDR	0.245898	1.88047	PRKAR2A	cAMP-dependent protein kinase type II-alpha regulatory subunit	P13861	218	15.7907	15.8684	15.8775	15.967	16.0909	16.1516	15.9814	16.2632	NO	NO
20 uM Staurosporine vs. DMSO	QEVQDLQASLKEEK	-0.338748	1.87975	EEA1	Early endosome antigen 1	Q15075	90	14.473	14.2592	14.5596	14.4368	14.0624	14.0037	14.1315	14.1759	NO	NO
20 uM Staurosporine vs. DMSO	LTTPTYGDLNHLVSATMSGVTTSLRFPGQLNADLR	-0.627684	1.8788	TUBB6	Tubulin beta-6 chain	Q9BUF5	217	14.4138	14.1608	14.2641	14.084	13.6518	13.2186	14.1024	13.4393	NO	NO
20 uM Staurosporine vs. DMSO	MAEALAHGADVNWANSEENK	-0.964294	1.87874	ACAP2	Arf-GAP with coiled-coil, ANK repeat and PH domain-containing protein 2	Q15057	622	10.9385	10.5509	10.8466	10.7346	9.57373	10.1651	9.52964	9.94499	NO	NO
20 uM Staurosporine vs. DMSO	SSTSEGLLLK	-1.90079	1.87868	MRPL1	Large ribosomal subunit protein uL1m	Q9BYD6	297	12.4566	13.2647	13.1798	13.3891	11.5602	10.8001	9.65527	12.6715	NO	NO
20 uM Staurosporine vs. DMSO	NYGILADATEQVGQHKDAYQVILDGVK	-0.272237	1.87738	API5	Apoptosis inhibitor 5	Q9BZZ5	10	16.1025	15.9023	15.788	16.0056	15.7547	15.5657	15.7262	15.6628	NO	NO
20 uM Staurosporine vs. DMSO	SACGNCYLGDAFR	0.164337	1.8769	CIAPIN1	Anamorsin	Q6FI81	272	17.3768	17.4268	17.4288	17.403	17.6697	17.5999	17.492	17.5312	NO	NO
20 uM Staurosporine vs. DMSO	LVVFDAR	0.686811	1.87576	POLR2K	DNA-directed RNA polymerases I, II, and III subunit RPABC4	P53803	52	14.9295	13.8949	14.4462	14.6199	15.3347	14.936	15.0266	15.3405	NO	NO
20 uM Staurosporine vs. DMSO	RDPVALEDVYPIHMILENKDGIQGSCR	-0.743368	1.8755	GTF3C1	General transcription factor 3C polypeptide 1	Q12789	89	12.4133	12.4426	12.603	12.2912	11.4022	11.5192	11.7967	12.0585	NO	NO
20 uM Staurosporine vs. DMSO	LTVEDLEKER	0.171668	1.87544	MAPRE1	Microtubule-associated protein RP/EB family member 1	Q15691	205	16.2209	16.3537	16.3047	16.3311	16.4267	16.4941	16.4822	16.4941	NO	NO
20 uM Staurosporine vs. DMSO	KLLTPAEEVLTEEER	-0.837695	1.87528	TANGO6	Transport and Golgi organization protein 6 homolog	Q9C0B7	238	11.9265	12.4878	12.362	12.3454	10.963	11.5816	11.6164	11.61	NO	NO
20 uM Staurosporine vs. DMSO	LGNDFHTNK	0.261126	1.8752	RPS17	Small ribosomal subunit protein eS17	P08708	24	14.7785	14.8612	14.7553	14.9448	15.0322	15.0475	15.1854	15.1192	NO	NO
20 uM Staurosporine vs. DMSO	IQPALQEK	0.26407	1.87483	PFDN5	Prefoldin subunit 5	Q99471	117	16.2677	16.3782	16.5072	16.5907	16.7455	16.7899	16.5979	16.6668	NO	NO
20 uM Staurosporine vs. DMSO	EEEQDQGVSCNKVEWWWDCLEMLR	-1.04983	1.87457	ARID1A	AT-rich interactive domain-containing protein 1A	O14497	2034	11.1366	11.3187	10.7326	11.8474	10.0566	10.0096	10.4561	10.3137	NO	NO
20 uM Staurosporine vs. DMSO	QFCQEGQPHVLEALSPPQTSGLSPSR	-1.00781	1.87457	MAF1	Repressor of RNA polymerase III transcription MAF1 homolog	Q9H063	46	14.7443	15.8117	15.1417	14.9133	13.4033	14.4575	14.6662	14.0529	NO	NO
20 uM Staurosporine vs. DMSO	LSTSTNGVAFMGILDGRPGNPLQNLQHVNLK	-1.50935	1.87454	TBC1D14	TBC1 domain family member 14	Q9P2M4	6	10.6478	10.7498	10.1544	10.8517	9.73861	9.8406	8.75461	8.03249	NO	NO
20 uM Staurosporine vs. DMSO	LDDLFLESFEITDVKPLKGDHLSR	-0.442732	1.87348	PNO1	RNA-binding protein PNO1	Q9NRX1	155	15.4101	14.9275	14.8445	15.1261	14.5853	14.6315	14.8182	14.5023	NO	NO
20 uM Staurosporine vs. DMSO	LQDAFSSIGQSCHLDLPQIAVVGGQSAGK	-0.339907	1.87331	DNM2	Dynamin-2	P50570	16	16.3583	16.076	15.9481	16.3291	15.9659	15.7541	15.76	15.872	NO	NO
20 uM Staurosporine vs. DMSO	SPGAAGLTSR	0.279998	1.87305	HS1BP3	HCLS1-binding protein 3	Q53T59	139	16.6876	16.8696	16.7667	16.6608	17.0366	16.9289	16.8952	17.2439	NO	NO
20 uM Staurosporine vs. DMSO	AFSDPFVEAEK	0.336873	1.87247	HSPA4	Heat shock 70 kDa protein 4	P34932	74	14.4935	14.7976	14.5857	14.6697	15.168	14.8628	14.9163	14.9469	NO	NO
20 uM Staurosporine vs. DMSO	TEADVNPK	0.276132	1.87247	SNU13	NHP2-like protein 1	P55769	2	14.3948	14.3329	14.4118	14.4442	14.6792	14.7693	14.6621	14.5777	NO	NO
20 uM Staurosporine vs. DMSO	HVAEVLEYTKDEQLESLFQR	-0.735188	1.87199	EIF2S1	Eukaryotic translation initiation factor 2 subunit 1	P05198	114	14.3418	13.772	13.7075	14.0287	13.5602	13.5417	12.8054	13.0019	NO	NO
20 uM Staurosporine vs. DMSO	LTADPGGSSETSSQVLENHTKPK	-1.02228	1.87163	XPC	DNA repair protein complementing XP-C cells	Q01831	339	11.8874	11.5264	11.8837	11.9337	10.9259	10.0997	11.305	10.8114	NO	NO
20 uM Staurosporine vs. DMSO	LANEGACNEPVLR	0.737179	1.87105	KANSL3	KAT8 regulatory NSL complex subunit 3	Q9P2N6	155	12.9128	13.1524	12.5189	12.174	13.2858	13.4832	13.4932	13.4447	NO	NO
20 uM Staurosporine vs. DMSO	SIPTLISRLPAVSSVACGASVGYAVTK	-0.32638	1.87017	RCC1	Regulator of chromosome condensation	P18754	336	15.2758	15.274	15.0485	15.4682	14.8271	14.9436	15.0122	14.978	NO	NO
20 uM Staurosporine vs. DMSO	EGSRPMMGDHR	0.746233	1.86931	SAFB2	Scaffold attachment factor B2	Q14151	785	11.7505	11.7375	11.2568	11.2755	12.2609	12.1127	12.2847	12.3469	NO	NO
20 uM Staurosporine vs. DMSO	AMYDYSAQDEDEVSFR	0.49039	1.86821	NEBL	Nebulette	O76041	961	13.8055	13.9253	14.1206	13.4873	14.1854	14.2768	14.3604	14.4776	NO	NO
20 uM Staurosporine vs. DMSO	QVSDLISVLR	0.195822	1.86617	DDX5	Probable ATP-dependent RNA helicase DDX5	P17844	452	20.6757	20.7611	20.9264	20.7267	20.8953	21.0268	20.9804	20.9707	NO	NO
20 uM Staurosporine vs. DMSO	AGHPPAVK	-0.732057	1.86549	DAP	Death-associated protein 1	P51397	13	12.7785	12.3696	12.8184	12.6054	11.804	12.3274	11.7501	11.762	NO	NO
20 uM Staurosporine vs. DMSO	YHQIGSGK	0.551763	1.86462	HNRNPDL	Heterogeneous nuclear ribonucleoprotein D-like	O14979	295	12.6938	13.2118	12.8235	12.7845	13.5217	13.5281	13.2297	13.4411	NO	NO
20 uM Staurosporine vs. DMSO	NLLHVTDTGVGMTR	0.144851	1.86416	HSP90B1	Endoplasmin	P14625	143	18.4327	18.4497	18.4964	18.4388	18.636	18.6695	18.5278	18.5637	NO	NO
20 uM Staurosporine vs. DMSO	SNTVVIMNMQGQIVR	1.51885	1.86312	SMU1	WD40 repeat-containing protein SMU1	Q2TAY7	419	9.63949	9.74147	11.6079	9.84346	11.875	11.3398	11.6883	12.0046	NO	NO
20 uM Staurosporine vs. DMSO	AMEALAR	0.686796	1.86264	DDX46	Probable ATP-dependent RNA helicase DDX46	Q7L014	566	11.816	12.3736	12.1434	12.1597	12.8725	13.1009	12.67	12.5965	NO	NO
20 uM Staurosporine vs. DMSO	RAAIQELQQK	1.79972	1.86173	CEP131	Centrosomal protein of 131 kDa	Q9UPN4	337	9.56698	9.46499	10.449	9.363	12.6375	11.606	11.7854	10.014	NO	NO
20 uM Staurosporine vs. DMSO	DDIPVFLR	0.217123	1.85943	ATXN10	Ataxin-10	Q9UBB4	263	15.9516	16.0785	16.1159	16.0969	16.2837	16.3561	16.1527	16.3189	NO	NO
20 uM Staurosporine vs. DMSO	EIKEVIELPVKHPELFEALGIAQPK	-1.77629	1.85842	PSMC5	26S proteasome regulatory subunit 8	P62195	160	13.3776	12.9191	12.1895	12.4984	11.6089	9.90656	12.2301	10.134	NO	NO
20 uM Staurosporine vs. DMSO	TGDLGDINAEQLPGREHLNEPGTR	-0.312011	1.85764	PLAA	Phospholipase A-2-activating protein	Q9Y263	326	16.458	16.103	15.9973	16.1691	15.9188	15.817	15.8748	15.8688	NO	NO
20 uM Staurosporine vs. DMSO	SHPLLSQSYELR	1.91684	1.85722	KANSL1	KAT8 regulatory NSL complex subunit 1	Q7Z3B3	110	9.50121	8.20092	10.3832	10.5875	11.7009	10.5977	11.7075	12.3341	NO	NO
20 uM Staurosporine vs. DMSO	SALQSINEWAAQTTDGKLPEVTKDVER	-0.519682	1.85709	SERPINH1	Serpin H1	P50454	168	15.4875	14.9424	15.0594	15.2138	14.3394	14.5871	14.9719	14.7259	NO	NO
20 uM Staurosporine vs. DMSO	AGAGGGGCPAGGNDFQWCFSQVK	1.09985	1.85634	PPP2R2D	Serine/threonine-protein phosphatase 2A 55 kDa regulatory subunit B delta isoform	Q66LE6	2	10.7337	10.8797	11.6961	12.1054	12.4175	12.398	12.3029	12.6959	NO	NO
20 uM Staurosporine vs. DMSO	IMMEFER	0.162987	1.856	CHMP2A	Charged multivesicular body protein 2a	O43633	125	17.5999	17.7016	17.7995	17.7198	17.8799	17.835	17.8925	17.8654	NO	NO
20 uM Staurosporine vs. DMSO	EVFQTASERVEAEGLAALHSLTACLSR	-0.455468	1.85568	MMS19	MMS19 nucleotide excision repair protein homolog	Q96T76	308	14.141	13.7254	13.709	13.9274	13.4768	13.3034	13.5124	13.3884	NO	NO
20 uM Staurosporine vs. DMSO	SAFSEEVNIK	2.24585	1.85373	FLOT2	Flotillin-2	Q14254	224	8.83653	8.93852	10.2285	9.04051	10.6246	10.5226	13.5822	11.2982	NO	NO
20 uM Staurosporine vs. DMSO	QVLLGDQIPK	-0.428252	1.85348	PSMB6	Proteasome subunit beta type-6	P28072	221	15.7728	15.7905	15.3618	15.8393	15.4706	15.3711	15.1392	15.0705	NO	NO
20 uM Staurosporine vs. DMSO	EDCSPDEFIDVIVGNR	1.31281	1.85331	DRG2	Developmentally-regulated GTP-binding protein 2	P55039	221	9.09422	8.99223	9.97623	8.89024	10.7206	10.8225	9.73655	10.9245	NO	NO
20 uM Staurosporine vs. DMSO	VTINTAIGHINR	-0.929611	1.85173	DICER1	Endoribonuclease Dicer	Q9UPY3	625	13.1035	11.9935	12.8143	12.3769	11.6958	11.9315	11.5458	11.3966	NO	NO
20 uM Staurosporine vs. DMSO	SAKPVGPEDMGATAVYELDTEKER	-0.447532	1.85114	RNF113A	E3 ubiquitin-protein ligase RNF113A	O15541	105	14.3513	14.2582	13.9834	14.0112	13.4982	13.6763	13.8882	13.7514	NO	NO
20 uM Staurosporine vs. DMSO	EADIDGDGQVNYEEFVQMMTAK	-0.434366	1.85099	CALM1	Calmodulin-1;Calmodulin-2;Calmodulin-3	P0DP23	128	14.9621	14.7799	14.4437	14.7592	14.4917	14.1321	14.212	14.3716	NO	NO
20 uM Staurosporine vs. DMSO	NLNLVSSTASIK	1.83469	1.85047	ARHGAP35	Rho GTPase-activating protein 35	Q9NRY4	764	10.4562	9.47503	9.16994	10.3579	11.7593	12.2469	10.1811	12.6106	NO	NO
20 uM Staurosporine vs. DMSO	LQERPWLVDSYSEWLQR	1.20607	1.84936	PANK4	4'-phosphopantetheine phosphatase	Q9NVE7	593	9.03733	9.5124	8.99423	9.61439	10.335	10.8772	9.79123	10.9792	NO	NO
20 uM Staurosporine vs. DMSO	LQSFLDPSVTR	-3.40655	1.84824	FMNL3	Formin-like protein 3	Q8IVF7	86	14.3087	14.3247	14.1906	13.4514	14.3153	9.11664	10.2026	9.01465	NO	NO
20 uM Staurosporine vs. DMSO	RTTVVAQLK	0.236881	1.84793	EIF3E	Eukaryotic translation initiation factor 3 subunit E	P60228	74	15.5566	15.5303	15.5791	15.579	15.8361	15.7936	15.6366	15.9262	NO	NO
20 uM Staurosporine vs. DMSO	AAAPPQPSPPPTK	2.07708	1.84715	TAF6	Transcription initiation factor TFIID subunit 6	P49848	525	10.9576	10.6507	13.2033	10.0946	12.3863	13.5425	13.8239	13.4616	NO	NO
20 uM Staurosporine vs. DMSO	TVNLNLWDTAGQEEYDRLR	-0.156642	1.84656	RHOG	Rho-related GTP-binding protein RhoG	P84095	50	17.2971	17.2625	17.3106	17.2606	17.0333	17.1288	17.1523	17.1897	NO	NO
20 uM Staurosporine vs. DMSO	HQSFVLVGETGSGK	-1.43493	1.84629	DHX15	ATP-dependent RNA helicase DHX15	O43143	153	12.9082	12.7231	12.665	12.6798	12.5698	10.4741	10.6131	11.5794	NO	NO
20 uM Staurosporine vs. DMSO	KTGNILQDLQPFLVK	1.69056	1.84557	WRN	Bifunctional 3'-5' exonuclease/ATP-dependent helicase WRN	Q14191	742	7.99621	7.55149	9.17658	7.09437	9.24624	9.34822	10.5362	9.45021	NO	NO
20 uM Staurosporine vs. DMSO	NLGFQMLQK	2.90164	1.8452	SUGP2	SURP and G-patch domain-containing protein 2	Q8IX01	1013	9.81563	9.91762	14.1755	10.0196	14.2141	13.6925	13.9939	13.6345	NO	NO
20 uM Staurosporine vs. DMSO	TDIPAGPLGSSALGEKPITFYR	-1.47394	1.84308	ALMS1	Centrosome-associated protein ALMS1	Q8TCU4	1608	11.2246	10.7268	9.74982	10.1998	9.77911	8.85531	9.11261	8.25814	NO	NO
20 uM Staurosporine vs. DMSO	VEAEVKR	2.68779	1.84249	SMC4	Structural maintenance of chromosomes protein 4	Q9NTJ3	880	9.95842	9.85643	7.92059	12.5221	12.8452	12.1597	12.6011	13.4026	NO	NO
20 uM Staurosporine vs. DMSO	MLKPQPLQQPSQPQQPPPTQQAVAR	-0.331475	1.84204	ATXN2L	Ataxin-2-like protein	Q8WWM7	1	16.017	15.7151	15.6976	15.8056	15.3064	15.4117	15.6693	15.522	NO	NO
20 uM Staurosporine vs. DMSO	ISQENEIGK	0.282592	1.84142	NBN	Nibrin	O60934	614	14.8305	14.5517	14.7335	14.7093	15.0856	14.9434	14.9314	14.995	NO	NO
20 uM Staurosporine vs. DMSO	VQRPGESSHLR	0.972167	1.84087	SBF1	Myotubularin-related protein 5	O95248	490	10.6364	10.5344	11.1225	10.4325	11.2419	11.8273	12.0873	11.4581	NO	NO
20 uM Staurosporine vs. DMSO	ILSVDGNK	0.212846	1.83991	SUPT5H	Transcription elongation factor SPT5	O00267	440	16.4673	16.3674	16.5636	16.3654	16.6254	16.7455	16.5668	16.6774	NO	NO
20 uM Staurosporine vs. DMSO	LVQAFQFTDKHGEVCPAGWKPGSDTIKPDVQK	-0.524418	1.83977	PRDX1	Peroxiredoxin-1	Q06830	159	14.5887	14.4287	13.9389	14.4058	13.5586	13.9545	13.8598	13.8915	NO	NO
20 uM Staurosporine vs. DMSO	GNGIVECLGPK	0.144446	1.83949	SAE1	SUMO-activating enzyme subunit 1	Q9UBE0	336	17.1425	17.1862	17.1351	17.1524	17.352	17.2774	17.2372	17.3273	NO	NO
20 uM Staurosporine vs. DMSO	QEFFVALR	-1.39068	1.83942	EPS15	Epidermal growth factor receptor substrate 15	P42566	71	11.7165	10.3212	9.78484	10.4232	9.24186	9.13987	9.26345	9.03788	NO	NO
20 uM Staurosporine vs. DMSO	HLSSLDSLESCYLSEFQTIREEHR	-1.09751	1.83905	PCNT	Pericentrin	O95613	964	12.4741	11.5716	11.9566	12.4431	11.0827	11.3078	11.3675	10.2974	NO	NO
20 uM Staurosporine vs. DMSO	GTVIKVPLKVEQANNAR	-0.6145	1.839	MYO6	Unconventional myosin-VI	Q9UM54	404	12.8801	13.1484	12.9201	13.0187	12.4952	12.2957	12.6507	12.0677	NO	NO
20 uM Staurosporine vs. DMSO	QLQQELEAFRGQLGDVGALDTVWR	-0.946786	1.83855	PTPN23	Tyrosine-protein phosphatase non-receptor type 23	Q9H3S7	1173	12.6147	12.9788	13.1197	13.5849	11.6712	11.8458	12.6629	12.3308	NO	NO
20 uM Staurosporine vs. DMSO	IQLKPEQFSSYLTSPDVGFSSYELVATPHNTSK	-0.43004	1.83658	MEPCE	7SK snRNA methylphosphate capping enzyme	Q7L2J0	640	16.0809	15.5847	15.4641	15.7382	15.3983	15.1157	15.3657	15.2679	NO	NO
20 uM Staurosporine vs. DMSO	TGVPDGIMQFIK	-1.51214	1.83592	ERCC3	General transcription and DNA repair factor IIH helicase subunit XPB	P19447	146	11.2733	12.0217	11.2597	10.8852	9.77202	10.8554	8.78802	9.976	NO	NO
20 uM Staurosporine vs. DMSO	NFYENLIDLK	0.277621	1.83536	UPF2	Regulator of nonsense transcripts 2	Q9HAU5	466	15.3118	15.5219	15.3835	15.4552	15.6332	15.7487	15.5457	15.8553	NO	NO
20 uM Staurosporine vs. DMSO	VNNVFDHFSDCEFLAALYNPFGNFKPHLQK	-0.756573	1.83529	TNFAIP8	Tumor necrosis factor alpha-induced protein 8	O95379	155	13.8527	13.1577	13.3444	13.6258	12.5254	12.5548	13.2851	12.5889	NO	NO
20 uM Staurosporine vs. DMSO	AEGPVAVVVNGHTEGPAPAR	-0.306113	1.83444	ZNF598	E3 ubiquitin-protein ligase ZNF598	Q86UK7	625	14.7677	14.6082	14.6171	14.7241	14.3452	14.2931	14.5445	14.31	NO	NO
20 uM Staurosporine vs. DMSO	LTQLQELDLSNNHLETLPDNLGLSHLR	-0.301124	1.83343	LRWD1	Leucine-rich repeat and WD repeat-containing protein 1	Q9UFC0	46	15.903	15.688	15.4821	15.8037	15.4608	15.401	15.4424	15.3681	NO	NO
20 uM Staurosporine vs. DMSO	IPGLEHASIEGPIANLSVLGTEELR	-0.315537	1.83248	CFAP36	Cilia- and flagella-associated protein 36	Q96G28	246	15.6893	15.4179	15.5615	15.6508	15.2605	15.1823	15.4809	15.1336	NO	NO
20 uM Staurosporine vs. DMSO	NCNFHHGFHPTTVCK	3.63117	1.83212	SMAD5	Mothers against decapentaplegic homolog 5	Q99717	359	10.6746	16.4505	12.3632	10.8786	17.0014	16.0908	15.5647	16.2347	NO	NO
20 uM Staurosporine vs. DMSO	ALCDVGTAISCSR	1.27245	1.83173	VKORC1	Vitamin K epoxide reductase complex subunit 1	Q9BQB6	41	9.42874	9.32675	10.3108	9.98057	11.6159	10.488	11.4427	10.59	NO	NO
20 uM Staurosporine vs. DMSO	GHTVTEPIQPLEPELPGEGQPEAR	-0.32312	1.83143	POLR1G	DNA-directed RNA polymerase I subunit RPA34	O15446	431	16.1772	15.8455	15.6762	15.882	15.5376	15.5889	15.5819	15.5801	NO	NO
20 uM Staurosporine vs. DMSO	ILELQMQSIMEK	1.16696	1.83137	IFIH1	Interferon-induced helicase C domain-containing protein 1	Q9BYX4	873	10.1778	10.5685	9.29574	10.3817	11.3917	10.7839	11.5469	11.3691	NO	NO
20 uM Staurosporine vs. DMSO	SSILLDVKPWDDETDMAK	-0.365515	1.83083	EEF1B2	Elongation factor 1-beta	P24534	140	17.3168	17.0977	17.1183	17.3513	16.5222	16.9851	16.9248	16.9899	NO	NO
20 uM Staurosporine vs. DMSO	IIGHFYASQMAQR	0.156211	1.82923	IGF2BP1	Insulin-like growth factor 2 mRNA-binding protein 1	Q9NZI8	539	17.801	17.923	17.9597	17.8731	18.059	17.9795	18.0836	18.0596	NO	NO
20 uM Staurosporine vs. DMSO	FFLSQLMLAPPR	0.714931	1.82851	CNOT11	CCR4-NOT transcription complex subunit 11	Q9UKZ1	183	12.5789	13.5281	13.1853	13.0172	14.1108	13.6711	13.5431	13.8443	NO	NO
20 uM Staurosporine vs. DMSO	QETAQISSNPPTSVPTAPALSSVIAPK	-1.44481	1.82846	TOM1L1	TOM1-like protein 1	O75674	165	12.8296	11.6361	11.2357	11.1508	10.7137	10.6006	9.53614	10.2225	NO	NO
20 uM Staurosporine vs. DMSO	LWGLFQR	0.24229	1.82835	TFR2	Transferrin receptor protein 2	Q9UP52	4	16.3755	16.4547	16.6765	16.3744	16.7422	16.7671	16.6548	16.6862	NO	NO
20 uM Staurosporine vs. DMSO	SGPVILADEIKNPAMEKLELVR	-0.349364	1.82744	ARFIP1	Arfaptin-1	P53367	108	15.2107	14.9842	14.8461	15.1154	14.5341	14.626	14.8368	14.7619	NO	NO
20 uM Staurosporine vs. DMSO	CKEEVVSTLDAVQVLSGVSQLLPK	-1.08214	1.82729	FCHO1	F-BAR domain only protein 1	O14526	113	10.804	10.249	9.9629	10.4847	9.55116	9.64264	8.94833	9.02985	NO	NO
20 uM Staurosporine vs. DMSO	VHQAAPLSDAPHDDAHGNFQYDHEAFLGR	-0.583544	1.82722	RCN3	Reticulocalbin-3	Q96D15	34	13.236	12.9375	12.9602	13.0342	12.538	12.1384	12.5419	12.6154	NO	NO
20 uM Staurosporine vs. DMSO	VIDPVTGKPCAGTTYLESPLSSETTQLSK	-1.44465	1.82692	MRPS17	Small ribosomal subunit protein uS17m	Q9Y2R5	91	13.2346	10.9926	11.7362	12.1232	10.3639	10.8083	10.6886	10.4473	NO	NO
20 uM Staurosporine vs. DMSO	RPEAAKEEAAWASSSAGNPADGLATEPESVFALDVLR	-0.828641	1.82673	SURF6	Surfeit locus protein 6	O75683	82	15.5124	14.8784	14.7115	14.9945	14.5177	14.0288	14.6618	13.574	NO	NO
20 uM Staurosporine vs. DMSO	ASEKPVSPK	-2.25874	1.82584	ARHGEF7	Rho guanine nucleotide exchange factor 7	Q14155	243	13.1859	13.1053	13.0324	13.6017	11.74	9.0766	10.2646	12.8092	NO	NO
20 uM Staurosporine vs. DMSO	TMESTKEFFTK	-3.0907	1.82521	UAP1	UDP-N-acetylhexosamine pyrophosphorylase	Q16222	170	14.3032	14.0307	13.7338	12.958	10.082	13.9108	8.79202	9.878	NO	NO
20 uM Staurosporine vs. DMSO	GSADNVTVMVVR	0.148813	1.8251	ILKAP	Integrin-linked kinase-associated serine/threonine phosphatase 2C	Q9H0C8	378	16.5718	16.5903	16.6172	16.6276	16.6967	16.7882	16.7727	16.7445	NO	NO
20 uM Staurosporine vs. DMSO	VENYPEVIR	-2.58138	1.82462	XPO7	Exportin-7	Q9UIA9	349	10.5749	12.5137	14.2333	13.7143	11.3949	9.34189	10.5299	9.44388	NO	NO
20 uM Staurosporine vs. DMSO	IFASIAPSIYGHEDIKR	-0.883778	1.82413	MCM2	DNA replication licensing factor MCM2	P49736	477	13.5893	13.7767	12.8396	14.2351	12.8317	12.6162	12.6049	12.8528	NO	NO
20 uM Staurosporine vs. DMSO	TQNLFEK	2.4707	1.82398	DCP1B	mRNA-decapping enzyme 1B	Q8IZD4	352	12.3376	9.77077	8.78677	11.8205	12.5296	13.8655	12.5601	13.6432	NO	NO
20 uM Staurosporine vs. DMSO	ELPDTVGELR	-3.28437	1.82208	LRSAM1	E3 ubiquitin-protein ligase LRSAM1	Q6UWE0	141	13.0353	13.9101	16.6102	14.9182	11.7796	13.8334	10.4046	9.31861	NO	NO
20 uM Staurosporine vs. DMSO	MFVGQVPR	0.184766	1.82199	CELF1	CUGBP Elav-like family member 1	Q92879	18	17.5769	17.6354	17.829	17.6869	17.8367	17.8967	17.8689	17.865	NO	NO
20 uM Staurosporine vs. DMSO	FKIPGSPPESMGR	0.235493	1.82186	GDI2	Rab GDP dissociation inhibitor beta	P50395	56	17.4386	17.5108	17.3789	17.3167	17.8409	17.5718	17.5614	17.6129	NO	NO
20 uM Staurosporine vs. DMSO	ILGSLLSDSLFLEVK	-1.81205	1.82066	PEX5	Peroxisomal targeting signal 1 receptor	P50542	458	11.5785	11.8186	10.1399	12.7832	10.167	10.065	8.87703	9.96302	NO	NO
20 uM Staurosporine vs. DMSO	NRPPFGQGYTQPGPGYR	0.140596	1.81962	TFG	Protein TFG	Q92734	384	17.2603	17.2358	17.2479	17.2357	17.4633	17.3588	17.3458	17.3742	NO	NO
20 uM Staurosporine vs. DMSO	AVENYLIQMAR	0.154425	1.81912	PDCD5	Programmed cell death protein 5	O14737	69	20.7167	20.7774	20.8581	20.7843	20.9288	20.952	21.0126	20.8608	NO	NO
20 uM Staurosporine vs. DMSO	TVETRDGQVINETSQHHDDLE	-0.884664	1.81876	VIM	Vimentin	P08670	446	12.7324	12.4965	12.0307	12.3893	10.9556	11.6677	11.8739	11.613	NO	NO
20 uM Staurosporine vs. DMSO	EQYELVHR	0.300264	1.81864	PTPN12	Tyrosine-protein phosphatase non-receptor type 12	Q05209	281	14.6948	14.708	14.559	14.872	14.9132	15.1407	14.9937	14.9872	NO	NO
20 uM Staurosporine vs. DMSO	TTPYLQHR	-1.4442	1.81779	NCKIPSD	NCK-interacting protein with SH3 domain	Q9NZQ3	670	11.5943	11.2599	10.7861	12.1821	10.5525	10.4522	10.0662	8.9746	NO	NO
20 uM Staurosporine vs. DMSO	LDDECAFYTSR	1.65446	1.81774	TROAP	Tastin	Q12815	730	11.5894	9.30624	10.5962	9.40823	12.0132	11.9514	12.1523	11.4011	NO	NO
20 uM Staurosporine vs. DMSO	EVSSATNALR	-2.1786	1.81712	SNRPA	U1 small nuclear ribonucleoprotein A	P09012	61	12.0947	12.8419	9.61436	10.7004	8.96472	8.86273	9.94872	8.76074	NO	NO
20 uM Staurosporine vs. DMSO	LLETQDGAEK	0.160519	1.8168	SPC24	Kinetochore protein Spc24	Q8NBT2	41	16.7254	16.7334	16.8608	16.7493	16.9247	16.8877	16.9695	16.9291	NO	NO
20 uM Staurosporine vs. DMSO	DLPVTSEDMGR	-1.23997	1.81642	ATXN1L	Ataxin-1-like	P0C7T5	18	9.78744	9.88943	11.2038	9.99142	8.87829	8.98028	9.18522	8.86848	NO	NO
20 uM Staurosporine vs. DMSO	AFTQSSTLR	-0.47197	1.81552	ZNF574	Zinc finger protein 574	Q6ZN55	559	14.4069	14.1793	14.5995	14.5797	13.8853	13.6952	14.1635	14.1335	NO	NO
20 uM Staurosporine vs. DMSO	MALEFNR	-0.374694	1.81434	TNIP1	TNFAIP3-interacting protein 1	Q15025	187	15.7343	15.89	16.0471	16.2506	15.4797	15.7816	15.6314	15.5304	NO	NO
20 uM Staurosporine vs. DMSO	SSFLANKQER	3.15281	1.81332	KIF14	Kinesin-like protein KIF14	Q15058	319	9.38934	9.28735	13.8822	9.18536	12.7567	14.0161	13.7134	13.8692	NO	NO
20 uM Staurosporine vs. DMSO	SAAAIALPPIAK	-0.937026	1.80957	LRBA	Lipopolysaccharide-responsive and beige-like anchor protein	P50851	213	13.428	13.0579	13.4265	12.648	11.8057	12.5231	11.7655	12.718	NO	NO
20 uM Staurosporine vs. DMSO	VPEPDNKK	-1.19878	1.80938	TOP1	DNA topoisomerase 1	P11387	185	11.4787	11.117	10.6985	10.7056	10.3727	10.0414	9.03636	9.7541	NO	NO
20 uM Staurosporine vs. DMSO	KLQDLWR	0.232963	1.80791	ARHGAP17	Rho GTPase-activating protein 17	Q68EM7	356	15.0985	15.1396	15.1669	14.9476	15.3187	15.3073	15.2999	15.3586	NO	NO
20 uM Staurosporine vs. DMSO	KIAMDILNYVGR	1.18408	1.80534	SSX2IP	Afadin- and alpha-actinin-binding protein	Q9Y2D8	223	9.22408	9.34584	10.4769	9.28725	10.8655	10.5881	11.0975	10.5193	NO	NO
20 uM Staurosporine vs. DMSO	TPALIVYGDQDPMGQTSFEHLK	-0.171098	1.80526	ABHD14B	Putative protein-lysine deacylase ABHD14B	Q96IU4	152	17.4478	17.3199	17.3105	17.4623	17.1637	17.2272	17.2712	17.1941	NO	NO
20 uM Staurosporine vs. DMSO	TDTVLILCR	0.172331	1.80485	CACYBP	Calcyclin-binding protein	Q9HB71	147	18.9079	18.9692	18.8467	19.0168	19.0417	19.2056	19.0541	19.1285	NO	NO
20 uM Staurosporine vs. DMSO	MELLCCEGTR	0.286493	1.804	CCND3	G1/S-specific cyclin-D3	P30281	1	14.9956	15.0578	15.2195	14.8642	15.345	15.4064	15.2714	15.2601	NO	NO
20 uM Staurosporine vs. DMSO	QYPANQGQEVEYFVAGTHPYPPGPGVALTADTK	-1.28755	1.80351	PLRG1	Pleiotropic regulator 1	O43660	81	14.1102	13.1124	13.3385	13.6233	12.1409	11.308	13.3129	12.2725	NO	NO
20 uM Staurosporine vs. DMSO	ELATNLNVGTSSSAASSLK	1.54958	1.80332	ARID1B	AT-rich interactive domain-containing protein 1B	Q8NFD5	1194	9.73353	9.83552	8.85152	9.9375	12.2171	11.4476	10.7116	10.1802	NO	NO
20 uM Staurosporine vs. DMSO	LAMQLEEQASR	0.194176	1.80318	KIF2C	Kinesin-like protein KIF2C	Q99661	706	16.2907	16.4067	16.3521	16.2857	16.4884	16.6563	16.4742	16.4931	NO	NO
20 uM Staurosporine vs. DMSO	EMEHNTVCAAGTSPVGEIGEEK	1.44606	1.80229	SON	Protein SON	P18583	1544	11.6086	10.0684	11.749	12.3745	12.5484	12.7588	13.0873	13.1903	NO	NO
20 uM Staurosporine vs. DMSO	ILPSLEDTLSLVK	1.46043	1.8022	DUS2	tRNA-dihydrouridine(20) synthase [NAD(P)+]-like	Q9NX74	158	9.11736	9.26841	9.51407	10.9174	11.6348	11.0383	10.596	11.3899	NO	NO
20 uM Staurosporine vs. DMSO	LYEEDDLDRLEQMEDSEGTVR	-1.64408	1.80181	PPFIBP1	Liprin-beta-1	Q86W92	950	11.4583	10.7774	12.5028	10.6754	10.4355	9.03737	10.2253	9.13936	NO	NO
20 uM Staurosporine vs. DMSO	LSPSPTSQR	0.229227	1.801	LMNA	Prelamin-A/C	P02545	389	16.119	16.0874	16.1234	15.9695	16.2464	16.1737	16.3745	16.4215	NO	NO
20 uM Staurosporine vs. DMSO	NNTVIDELPFK	2.71536	1.80032	GAB2	GRB2-associated-binding protein 2	Q9UQC2	532	13.8569	9.82777	12.1797	9.92976	13.1201	14.4979	14.5803	14.4574	NO	NO
20 uM Staurosporine vs. DMSO	LNSLMSLVNK	0.193763	1.79956	PSMD12	26S proteasome non-ATPase regulatory subunit 12	O00232	432	15.9636	15.9395	15.9757	15.8575	16.2127	16.0358	16.1532	16.1095	NO	NO
20 uM Staurosporine vs. DMSO	ENGELLPILR	0.190222	1.79935	GLRX3	Glutaredoxin-3	O76003	323	18.2884	18.3978	18.3947	18.4496	18.6068	18.6548	18.4254	18.6045	NO	NO
20 uM Staurosporine vs. DMSO	SHLPTHLDPAMPFHR	-2.06964	1.79933	NCOR1	Nuclear receptor corepressor 1	O75376	1562	12.3554	10.8828	11.2474	11.8451	9.85202	11.1546	9.01455	8.03111	NO	NO
20 uM Staurosporine vs. DMSO	VVSQLLR	0.276455	1.7991	POLD1	DNA polymerase delta catalytic subunit	P28340	555	17.6031	17.4536	17.7722	17.39	17.7797	17.9149	17.9037	17.7266	NO	NO
20 uM Staurosporine vs. DMSO	LRLSCLDLEQCSLK	-1.93906	1.79838	MALT1	Mucosa-associated lymphoid tissue lymphoma translocation protein 1	Q9UDY8	67	13.0897	13.5216	14.195	13.5876	11.1111	11.3068	13.6619	10.5579	NO	NO
20 uM Staurosporine vs. DMSO	SIYPITR	2.16512	1.79817	METTL15	12S rRNA N4-methylcytidine (m4C) methyltransferase	A6NJ78	244	9.90778	10.8226	12.8039	9.2298	12.4391	12.8482	13.3459	12.7913	NO	NO
20 uM Staurosporine vs. DMSO	LSLQYPDVYR	1.92848	1.79788	PREP	Prolyl endopeptidase	P48147	2	9.01106	8.90908	9.89307	8.80709	10.8037	10.9057	9.8197	12.8051	NO	NO
20 uM Staurosporine vs. DMSO	KQEDSVTELTVEDSGESLEDLMAK	-0.85909	1.79788	UBA5	Ubiquitin-like modifier-activating enzyme 5	Q9GZZ9	377	14.3355	13.7769	14.3539	13.8153	13.1834	12.6761	13.9211	13.0646	NO	NO
20 uM Staurosporine vs. DMSO	NPETVMQFLEK	1.37566	1.79772	MIPEP	Mitochondrial intermediate peptidase	Q99797	313	9.0301	8.92812	10.5584	9.1273	10.7847	10.8867	11.167	10.3082	NO	NO
20 uM Staurosporine vs. DMSO	VFGAPNVVEDEIDQYLSKQDGK	-0.703615	1.79647	NPLOC4	Nuclear protein localization protein 4 homolog	Q8TAT6	99	13.5749	13.4148	12.9782	13.6354	12.6323	12.878	12.9989	12.2798	NO	NO
20 uM Staurosporine vs. DMSO	MGESDDSILR	0.161031	1.79602	RPS21	Small ribosomal subunit protein eS21	P63220	62	17.261	17.3364	17.4476	17.4137	17.5289	17.5128	17.5473	17.5139	NO	NO
20 uM Staurosporine vs. DMSO	GSGFPDGEGSSR	1.82736	1.79593	SPN	Leukosialin	P16150	327	9.15071	9.2527	10.5427	9.35469	10.3104	11.6344	10.8427	12.8227	NO	NO
20 uM Staurosporine vs. DMSO	VLAETPDSFEK	0.174906	1.79581	NUP88	Nuclear pore complex protein Nup88	Q99567	521	17.3156	17.4578	17.4635	17.3643	17.5622	17.6752	17.5159	17.5476	NO	NO
20 uM Staurosporine vs. DMSO	SPAIDSTRGDSSSLVAELQEK	-0.681519	1.795	RB1CC1	RB1-inducible coiled-coil protein 1	Q8TDY2	1274	12.5452	12.5402	12.5878	12.5536	11.4575	11.8589	12.0456	12.1387	NO	NO
20 uM Staurosporine vs. DMSO	NILVLGNSFR	-1.12023	1.79487	ZNF407	Zinc finger protein 407	Q9C0G0	419	11.8286	11.8531	11.6655	11.6677	10.8648	9.73426	10.6305	11.3044	NO	NO
20 uM Staurosporine vs. DMSO	DKTLKICANHYITPMMELKPNAGSDR	-0.612717	1.7946	RANBP1	Ran-specific GTPase-activating protein	P43487	93	14.6493	14.2218	14.2332	14.3464	13.4583	13.5223	14.2699	13.7494	NO	NO
20 uM Staurosporine vs. DMSO	GAETLVTR	0.501984	1.79429	SYMPK	Symplekin	Q92797	851	15.5121	15.9703	15.836	15.6282	15.7863	16.3316	16.3752	16.4614	NO	NO
20 uM Staurosporine vs. DMSO	HTIEMIEK	0.779923	1.79383	PHF3	PHD finger protein 3	Q92576	1033	11.1013	10.8935	11.0205	10.7973	11.5878	12.0954	11.6884	11.5607	NO	NO
20 uM Staurosporine vs. DMSO	YPSATNNTPAK	0.510428	1.79373	GEMIN5	Gem-associated protein 5	Q8TEQ6	1188	13.9944	13.6197	14.3878	13.9921	14.5269	14.6707	14.4627	14.3752	NO	NO
20 uM Staurosporine vs. DMSO	FTPGAVMLR	0.168641	1.79367	ZC3H13	Zinc finger CCCH domain-containing protein 13	Q5T200	1521	16.5066	16.5172	16.535	16.408	16.7223	16.6007	16.6797	16.6386	NO	NO
20 uM Staurosporine vs. DMSO	FGSAIPIPSLPDKQVTGRFEEEFIK	-0.448129	1.79361	SNX9	Sorting nexin-9	Q9Y5X1	301	15.2977	14.9115	14.6906	15.0166	14.4113	14.3706	14.7076	14.6344	NO	NO
20 uM Staurosporine vs. DMSO	LAGEEAALGAELCEETPVNDNSSIVVR	-2.1236	1.79342	KIF5A	Kinesin heavy chain isoform 5A	Q12840	382	13.3384	12.8665	13.0802	13.3589	11.838	12.7291	9.19725	10.3852	NO	NO
20 uM Staurosporine vs. DMSO	GFGFVEFEDPR	0.186591	1.79324	SRSF5	Serine/arginine-rich splicing factor 5	Q13243	38	16.5468	16.4281	16.6608	16.5185	16.757	16.7256	16.7312	16.6869	NO	NO
20 uM Staurosporine vs. DMSO	EGFWPEAFSEVAEKHNNR	-1.50671	1.79255	EIF1AD	Probable RNA-binding protein EIF1AD	Q8N9N8	99	12.9371	13.4594	14.9303	14.92	11.9689	13.0477	12.3811	12.8222	NO	NO
20 uM Staurosporine vs. DMSO	APLQGDHNHLFIR	-1.39893	1.79251	LEO1	RNA polymerase-associated protein LEO1	Q8WVC0	462	10.9763	10.9441	9.65409	10.8421	8.76872	8.87071	10.0587	9.12273	NO	NO
20 uM Staurosporine vs. DMSO	ALTGSEDYLLLACDGFFDVVPHQEVVGLVQSHLTR	-0.545617	1.79242	PPM1F	Protein phosphatase 1F	P49593	347	17.5014	16.991	16.8246	17.3927	16.7435	16.5425	16.9147	16.3266	NO	NO
20 uM Staurosporine vs. DMSO	LVQDVANNTNEEAGDGTTTATVLAR	-0.312313	1.79183	HSPD1	60 kDa heat shock protein, mitochondrial	P10809	97	20.1017	19.8156	19.6162	19.9679	19.436	19.5902	19.6579	19.5681	NO	NO
20 uM Staurosporine vs. DMSO	TETQEKNPLPSKETIEQEK	-0.338846	1.79132	TMSB4X	Thymosin beta-4	P62328	21	17.4567	17.1733	17.1165	17.1864	16.679	16.8027	17.1072	16.9886	NO	NO
20 uM Staurosporine vs. DMSO	KILGQEGDASYLASEISTWDGVIVTPSEK	-1.43156	1.79121	ILF2	Interleukin enhancer-binding factor 2	Q12905	328	11.587	10.6838	10.3349	10.5309	9.55911	8.77353	10.2762	8.80141	NO	NO
20 uM Staurosporine vs. DMSO	RNGAAGPHSPDPLLDEQAFGDLTDLPVVPK	-0.764301	1.78976	CDC42EP4	Cdc42 effector protein 4	Q9H3Q1	166	13.9098	13.1464	12.9343	13.7825	12.8738	12.5631	12.6576	12.6212	NO	NO
20 uM Staurosporine vs. DMSO	GQTLNVNR	0.443746	1.7888	TSR1	Pre-rRNA-processing protein TSR1 homolog	Q2NL82	280	14.8384	15.1856	14.613	14.9464	15.5554	15.1615	15.1853	15.4561	NO	NO
20 uM Staurosporine vs. DMSO	LAELLTQQHGLQCR	-0.200862	1.78842	NOL6	Nucleolar protein 6	Q9H6R4	765	15.4189	15.3628	15.3357	15.3253	15.2057	15.1648	15.1571	15.1117	NO	NO
20 uM Staurosporine vs. DMSO	LGQHVPTLHPTSEELTIAGMTFTTFDLGGHEQAR	-0.459645	1.78685	SAR1A	GTP-binding protein SAR1a	Q9NR31	50	15.8039	15.3034	15.3143	15.3719	15.1333	14.7212	15.2001	14.9003	NO	NO
20 uM Staurosporine vs. DMSO	RTDLTVLVAHNDDPTDQMFVFFPEEPK	-1.22267	1.78683	POLR2E	DNA-directed RNA polymerases I, II, and III subunit RPABC1	P19388	55	11.0887	10.695	10.3228	10.9453	9.46096	10.4328	9.23406	9.03332	NO	NO
20 uM Staurosporine vs. DMSO	VFPMPLPR	0.180534	1.78634	NCAPH	Condensin complex subunit 2	Q15003	33	19.4749	19.3906	19.6246	19.4539	19.6044	19.6751	19.7455	19.6412	NO	NO
20 uM Staurosporine vs. DMSO	SMSGYLSGFQAR	0.578844	1.78606	ITSN2	Intersectin-2	Q9NZM3	258	12.3734	12.6339	12.0628	12.5313	13.011	13.0202	12.9145	12.971	NO	NO
20 uM Staurosporine vs. DMSO	EYTTICR	0.31274	1.78594	PRKRA	Interferon-inducible double-stranded RNA-dependent protein kinase activator A	O75569	158	15.8867	15.7228	15.5519	15.9436	16.101	15.9352	16.1076	16.2121	NO	NO
20 uM Staurosporine vs. DMSO	SAEAPALAPR	0.807425	1.78416	REXO1	RNA exonuclease 1 homolog	Q8N1G1	121	12.8762	11.8555	12.9299	12.5824	13.1285	13.5207	13.3081	13.5165	NO	NO
20 uM Staurosporine vs. DMSO	LIETQMER	0.237556	1.78399	CNOT3	CCR4-NOT transcription complex subunit 3	O75175	83	16.1706	15.9418	16.2411	16.1011	16.3028	16.2957	16.3585	16.4477	NO	NO
20 uM Staurosporine vs. DMSO	FYNLVLLPR	0.189558	1.78337	BYSL	Bystin	Q13895	249	18.7192	18.7942	18.866	18.759	18.8689	19.1007	18.9049	19.022	NO	NO
20 uM Staurosporine vs. DMSO	NLVAHGQAFSKPILDLGAEALIMQAR	-0.326662	1.78236	ARMC6	Armadillo repeat-containing protein 6	Q6NXE6	440	15.3087	15.0827	15.0404	15.049	15.0167	14.7347	14.6793	14.7434	NO	NO
20 uM Staurosporine vs. DMSO	RQQLAGNGGPPEGSLDVLQSWCEK	-1.89952	1.77998	STAT5A	Signal transducer and activator of transcription 5A	P42229	258	10.8811	11.2917	10.8408	10.4753	7.60395	10.4166	9.64149	8.22877	NO	NO
20 uM Staurosporine vs. DMSO	IPDEINDR	0.577798	1.77989	PDCD10	Programmed cell death protein 10	Q9BUL8	117	15.2177	14.4548	15.3352	15.0572	15.7808	15.683	15.503	15.4093	NO	NO
20 uM Staurosporine vs. DMSO	QKIAEEIGIEGSDDDALVTGEQDEELSR	2.34339	1.77916	PAXBP1	PAX3- and PAX7-binding protein 1	Q9Y5B6	284	10.2343	10.1323	8.84234	10.0303	13.2297	13.051	12.5478	9.78445	NO	NO
20 uM Staurosporine vs. DMSO	SQGDNNVSLVEEFRK	-1.80002	1.77888	USP3	Ubiquitin carboxyl-terminal hydrolase 3	Q9Y6I4	210	13.0113	11.8571	11.1387	10.6472	9.53404	9.07159	10.824	10.0246	NO	NO
20 uM Staurosporine vs. DMSO	IQNHIQTLK	1.35377	1.77715	DMD	Dystrophin	P11532	1053	8.88273	8.77434	10.3701	9.08671	10.8851	10.2352	11.0343	10.3744	NO	NO
20 uM Staurosporine vs. DMSO	VDLVDENFTELRGEIAGPPDTPYEGGR	-0.418501	1.77712	UBE2K	Ubiquitin-conjugating enzyme E2 K	P61086	29	14.2412	14.2006	13.8912	14.167	13.462	13.7558	13.805	13.8033	NO	NO
20 uM Staurosporine vs. DMSO	VAPDEHPILLTEAPLNPK	-0.261592	1.77621	ACTBL2	Beta-actin-like protein 2	Q562R1	97	23.7489	23.684	23.5747	23.8906	23.298	23.5216	23.526	23.5062	NO	NO
20 uM Staurosporine vs. DMSO	STVMSLACTSQSLYAGLVNGAVASYAR	-1.26966	1.77541	ARHGEF10	Rho guanine nucleotide exchange factor 10	O15013	1023	10.5221	10.6241	9.64013	10.7261	8.93896	8.83697	9.92295	8.73498	NO	NO
20 uM Staurosporine vs. DMSO	GFPGYMYTDLATIYER	0.693814	1.77526	ATP6V1B2	V-type proton ATPase subunit B, brain isoform	P21281	322	13.005	13.9342	14.0649	13.6248	14.2745	14.2004	14.4276	14.5017	NO	NO
20 uM Staurosporine vs. DMSO	TAASGVEANSRPLDHAQPPSSLVIDKESEVYK	-0.517702	1.77479	PDLIM1	PDZ and LIM domain protein 1	O00151	167	16.5997	16.0513	15.7634	16.2502	15.4869	15.5584	15.8385	15.7101	NO	NO
20 uM Staurosporine vs. DMSO	FMTDPIR	0.229681	1.77463	EIF4A3	Eukaryotic initiation factor 4A-III	P38919	232	16.2635	16.4595	16.4306	16.3456	16.707	16.6472	16.4431	16.6205	NO	NO
20 uM Staurosporine vs. DMSO	MNALDLNMK	0.330649	1.77428	HMOX2	Heme oxygenase 2	P30519	206	16.5227	16.4084	16.1558	16.041	16.621	16.7003	16.5171	16.6122	NO	NO
20 uM Staurosporine vs. DMSO	EAQKELQEK	1.1134	1.77407	PRPF3	U4/U6 small nuclear ribonucleoprotein Prp3	O43395	455	12.0079	11.1356	10.5204	11.9528	12.6681	12.4722	12.2734	12.6566	NO	NO
20 uM Staurosporine vs. DMSO	LRSEDGQPMVLK	0.609804	1.77401	KDM3B	Lysine-specific demethylase 3B	Q7LBC6	1473	14.401	14.2969	14.0941	13.5791	14.673	14.4974	15.0387	14.6013	NO	NO
20 uM Staurosporine vs. DMSO	LVMMFEGK	0.166705	1.77392	AIF1L	Allograft inflammatory factor 1-like	Q9BQI0	122	17.2874	17.1682	17.3043	17.1735	17.4591	17.4337	17.3682	17.3391	NO	NO
20 uM Staurosporine vs. DMSO	SGTGIHIDPLGTSAWNALVQGHKR	-0.779192	1.77195	JMJD6	Bifunctional arginine demethylase and lysyl-hydroxylase JMJD6	Q6NYC1	182	12.3224	12.083	11.7494	12.0735	10.9144	11.4542	11.4814	11.2615	NO	NO
20 uM Staurosporine vs. DMSO	FEGPLNVDLIEFQTNLVPYPR	1.81577	1.7716	TUBAL3	Tubulin alpha chain-like 3	A6NHL2	251	10.8906	8.71858	11.499	10.6851	11.9509	12.8143	11.6934	12.5977	NO	NO
20 uM Staurosporine vs. DMSO	SYSFDEIRK	-1.08209	1.77029	NAMPT	Nicotinamide phosphoribosyltransferase	P43490	470	10.6168	10.5148	10.5473	10.4128	9.32942	9.15002	10.236	9.04803	NO	NO
20 uM Staurosporine vs. DMSO	VNAQDNELSNVEFHCGRAEDLVPTLVSR	-0.405727	1.77006	TRMT2A	tRNA (uracil-5-)-methyltransferase homolog A	Q8IZ69	472	14.8375	14.5741	14.2624	14.5979	14.0452	14.2059	14.2283	14.1697	NO	NO
20 uM Staurosporine vs. DMSO	YIPSRGPLDKWR	-0.345717	1.76889	RPL10	Large ribosomal subunit protein uL16	P27635	199	15.8994	15.5802	15.5222	15.7188	15.5409	15.2255	15.1833	15.3881	NO	NO
20 uM Staurosporine vs. DMSO	APVIRPGGTLGLSEAADSDAHLFQDSTEPR	-0.457136	1.76878	TNKS1BP1	182 kDa tankyrase-1-binding protein	Q9C0C2	1585	15.1014	14.824	14.5429	14.9613	14.1307	14.42	14.6087	14.4417	NO	NO
20 uM Staurosporine vs. DMSO	LYIGNLSENAAPSDLESIFKDAK	-0.192426	1.76818	IGF2BP3	Insulin-like growth factor 2 mRNA-binding protein 3	O00425	4	15.8383	15.9142	15.7716	15.9188	15.6043	15.6877	15.7029	15.6784	NO	NO
20 uM Staurosporine vs. DMSO	SHPPLHEYADLNQLTQGDQEK	-0.604033	1.7672	TGFBRAP1	Transforming growth factor-beta receptor-associated protein 1	Q8WUH2	400	13.4997	13.4425	13.3344	13.0111	13.02	12.8254	12.604	12.4222	NO	NO
20 uM Staurosporine vs. DMSO	TQALEMNKR	0.397049	1.76697	RNF20	E3 ubiquitin-protein ligase BRE1A	Q5VTR2	827	15.5083	15.7759	15.6677	16.0888	16.0256	16.3594	16.0688	16.1751	NO	NO
20 uM Staurosporine vs. DMSO	EPLLSSSENGNGGR	0.632869	1.76669	ARHGEF1	Rho guanine nucleotide exchange factor 1	Q92888	782	13.5927	12.9759	13.215	13.1934	14.2727	13.923	13.8428	13.4699	NO	NO
20 uM Staurosporine vs. DMSO	QSSFALLGDLTK	0.342864	1.76605	TNPO1	Transportin-1	Q92973	693	15.089	15.4494	15.2925	15.4018	15.4939	15.8511	15.5342	15.7251	NO	NO
20 uM Staurosporine vs. DMSO	SHVAVENALGLDQQFAGLDLNSSDNQSGGSTASK	-0.555804	1.76494	DDX3X	ATP-dependent RNA helicase DDX3X	O00571	2	15.3946	14.9592	14.6886	15.4673	14.3448	14.7049	14.6738	14.5631	NO	NO
20 uM Staurosporine vs. DMSO	HQEGEIFDTEKEKYEITEQR	-0.338028	1.76476	RPL6	Large ribosomal subunit protein eL6	Q02878	227	17.3005	17.2449	16.8748	17.4206	16.9657	16.8978	16.8128	16.8124	NO	NO
20 uM Staurosporine vs. DMSO	QSGGTTALPLYFVGLYCDKK	-1.58677	1.7647	MRPL44	Large ribosomal subunit protein mL44	Q9H9J2	260	11.7399	11.338	11.4374	11.2722	11.1331	10.319	9.2269	8.76135	NO	NO
20 uM Staurosporine vs. DMSO	TDPSILGGMIVR	0.97517	1.76404	ATP5PO	ATP synthase subunit O, mitochondrial	P48047	177	11.1828	12.126	11.8291	12.5171	12.4995	13.0585	13.2235	12.7742	NO	NO
20 uM Staurosporine vs. DMSO	DCGGVPALVR	0.474832	1.76291	ARVCF	Splicing regulator ARVCF	O00192	441	13.9593	14.2483	13.8184	13.9236	14.2874	14.6557	14.2089	14.6969	NO	NO
20 uM Staurosporine vs. DMSO	IIASSPEMNLPTVSALR	-0.479591	1.76287	PYCR2	Pyrroline-5-carboxylate reductase 2	Q96C36	30	16.0688	15.3811	15.8818	15.7543	15.4455	15.0034	15.3856	15.3331	NO	NO
20 uM Staurosporine vs. DMSO	HGVVPLATYMR	0.133258	1.76178	RPL21	Large ribosomal subunit protein eL21	P46778	22	20.8768	20.8431	20.9124	20.8286	20.9836	20.9799	21.0768	20.9537	NO	NO
20 uM Staurosporine vs. DMSO	TLQLDNNFEVK	-0.628306	1.76149	PRPF19	Pre-mRNA-processing factor 19	Q9UMS4	429	13.1437	12.8548	13.0028	13.0152	12.3345	11.977	12.6937	12.4981	NO	NO
20 uM Staurosporine vs. DMSO	FTADDQYKR	1.8958	1.7607	NBAS	NBAS subunit of NRZ tethering complex	A2RRP1	1660	11.7015	12.3332	9.39211	10.5801	12.2234	13.0152	12.7584	13.5932	NO	NO
20 uM Staurosporine vs. DMSO	NPFGNAGLLLGEAGK	0.640378	1.76066	ACADVL	Very long-chain specific acyl-CoA dehydrogenase, mitochondrial	P49748	493	12.574	13.0389	13.0237	12.4041	13.6469	13.4565	13.3727	13.1261	NO	NO
20 uM Staurosporine vs. DMSO	SKAPSVSR	-2.44295	1.76016	INPPL1	Phosphatidylinositol 3,4,5-trisphosphate 5-phosphatase 2	O15357	900	9.6866	12.4971	11.7108	11.8921	9.77449	9.6725	6.99736	9.57051	NO	NO
20 uM Staurosporine vs. DMSO	LIVSNEQEVLR	1.65295	1.76014	ANKRD12	Ankyrin repeat domain-containing protein 12	Q6UB98	1924	8.87165	8.97364	10.2636	9.07562	10.5894	10.4875	12.3339	10.3855	NO	NO
20 uM Staurosporine vs. DMSO	IVVELPHSVNSKL	-1.67388	1.75984	PTGR3	Prostaglandin reductase 3	Q8N4Q0	365	10.7098	10.4338	9.45645	10.6444	9.66929	7.76507	7.84847	9.26613	NO	NO
20 uM Staurosporine vs. DMSO	QRQPPGTQQSHSSPGEITSSPQGLDNPALLR	-0.379813	1.75908	DDI2	Protein DDI1 homolog 2	Q5TDH0	109	16.9968	16.5705	16.4292	16.4955	16.2613	16.1326	16.3875	16.1914	NO	NO
20 uM Staurosporine vs. DMSO	SSLDDYCPSDQVDTIQEKVLNMLR	1.25369	1.75902	C5orf22	UPF0489 protein C5orf22	Q49AR2	401	8.93994	9.77208	9.82195	8.73596	9.84909	10.9164	10.8331	10.6861	NO	NO
20 uM Staurosporine vs. DMSO	SKPELPPGLSPEATAPVTPSRPEGGEPGLSK	-0.614538	1.75856	PYM1	Partner of Y14 and mago	Q9BRP8	55	14.7084	14.6143	14.3294	14.4655	13.7909	13.419	14.0914	14.3582	NO	NO
20 uM Staurosporine vs. DMSO	TGDVLLAEPADFESLLLSRPVLEGLR	-0.366347	1.75831	DDX20	Probable ATP-dependent RNA helicase DDX20	Q9UHI6	53	16.5952	16.024	16.1287	16.2697	15.8257	15.8204	16.0065	15.8996	NO	NO
20 uM Staurosporine vs. DMSO	LSNRPAFMPSEGR	0.458897	1.75768	ACTN1	Alpha-actinin-1	P12814	347	13.138	13.522	13.1283	13.3451	13.6151	13.6918	13.9498	13.7123	NO	NO
20 uM Staurosporine vs. DMSO	EVTAAPAVAVPPEATVAITTALSK	-0.967939	1.75761	PPP6R2	Serine/threonine-protein phosphatase 6 regulatory subunit 2	O75170	885	12.5048	12.2583	11.5765	12.0832	10.5926	11.063	11.5593	11.3361	NO	NO
20 uM Staurosporine vs. DMSO	MSSLQPVELLLPSALSEQTEALIHR	-0.961416	1.75743	MSH3	DNA mismatch repair protein Msh3	P20585	418	14.3818	14.6003	14.9457	15.3693	13.7167	13.1173	14.4902	14.1273	NO	NO
20 uM Staurosporine vs. DMSO	ADKTPGGSQK	0.744155	1.75691	U2SURP	U2 snRNP-associated SURP motif-containing protein	O15042	2	13.7748	13.7264	12.8655	14.058	14.2041	14.4632	14.2193	14.5146	NO	NO
20 uM Staurosporine vs. DMSO	EGRPSGEAFVELESEDEVKLALKK	-0.536433	1.75641	HNRNPH1	Heterogeneous nuclear ribonucleoprotein H	P31943	50	16.8952	16.2055	16.087	16.2661	15.8016	15.6268	16.0706	15.8091	NO	NO
20 uM Staurosporine vs. DMSO	ECPSDECGAGVFMASHFDR	0.193221	1.75593	RPS27A	Ubiquitin-ribosomal protein eS31 fusion protein	P62979	120	17.3316	17.4789	17.3416	17.4812	17.7106	17.4982	17.6291	17.5682	NO	NO
20 uM Staurosporine vs. DMSO	MVSCNIFR	-3.60555	1.75368	PPP2R5E	Serine/threonine-protein phosphatase 2A 56 kDa regulatory subunit epsilon isoform	Q16537	118	11.1276	10.675	9.93791	9.93781	3.89647	10.4233	6.54585	6.39054	NO	NO
20 uM Staurosporine vs. DMSO	DSAPYGEYGSWYK	1.2672	1.7535	KLC2	Kinesin light chain 2	Q9H0B6	427	10.8803	11.2525	12.796	11.0205	12.7961	12.7069	12.91	12.605	NO	NO
20 uM Staurosporine vs. DMSO	RELQVQK	1.29359	1.75248	CUX1	Homeobox protein cut-like 1	P39880	680	9.10441	9.2064	8.07137	9.30839	10.2135	10.493	9.48522	10.6732	NO	NO
20 uM Staurosporine vs. DMSO	EMAHGSQEAEAPGAVAGAAEVPREPPILPR	-0.554443	1.75189	NUDCD3	NudC domain-containing protein 3	Q8IVD9	141	15.4267	14.8775	14.6999	15.2722	14.2166	14.51	14.7437	14.5882	NO	NO
20 uM Staurosporine vs. DMSO	LLLSHGSNPR	1.54322	1.75106	ANKRD39	Ankyrin repeat domain-containing protein 39	Q53RE8	115	11.7035	11.4037	9.31199	10.5	12.1325	12.1829	12.6442	12.1325	NO	NO
20 uM Staurosporine vs. DMSO	LLELALQQYPR	0.194714	1.751	DNAJC1	DnaJ homolog subfamily C member 1	Q96KC8	504	15.7315	15.6468	15.8455	15.7335	15.9843	15.8847	15.9412	15.926	NO	NO
20 uM Staurosporine vs. DMSO	NSSYVHGGLDSNGKPADAVYGQK	-0.22193	1.74984	G3BP1	Ras GTPase-activating protein-binding protein 1	Q13283	37	17.8436	17.602	17.5355	17.7177	17.5066	17.3567	17.4685	17.4793	NO	NO
20 uM Staurosporine vs. DMSO	ASPAFDYAEFEPHIVPSTKNPHQLFCK	-1.38251	1.74925	SURF2	Surfeit locus protein 2	Q15527	58	10.9495	11.4973	10.0788	11.6129	9.73086	10.0235	10.021	8.833	NO	NO
20 uM Staurosporine vs. DMSO	DGDFENPVPYTGAVK	0.230336	1.74903	ERP29	Endoplasmic reticulum resident protein 29	P30040	123	15.6824	15.9854	15.8036	15.8673	16.1144	16.013	16.0284	16.1044	NO	NO
20 uM Staurosporine vs. DMSO	FGPYESYDSR	0.2055	1.74839	ZNF326	DBIRD complex subunit ZNF326	Q5BKZ1	71	15.3929	15.3941	15.4152	15.5299	15.5641	15.7135	15.6648	15.6117	NO	NO
20 uM Staurosporine vs. DMSO	LCLHNLPK	-0.680121	1.74741	RBM28	RNA-binding protein 28	Q9NW13	489	14.6097	14.5646	13.716	14.5518	13.6254	13.9818	13.4195	13.6949	NO	NO
20 uM Staurosporine vs. DMSO	KPEVGGVIR	1.18311	1.74669	MRPL11	Large ribosomal subunit protein uL11m	Q9Y3B7	13	9.01427	8.91228	9.89628	8.81029	10.2836	10.9025	9.8165	10.363	NO	NO
20 uM Staurosporine vs. DMSO	TSSCGVVHRPER	-1.65271	1.74601	BORCS6	BLOC-1-related complex subunit 6	Q96GS4	64	11.5814	11.6458	12.4739	11.9947	9.19373	10.9311	11.4823	9.47791	NO	NO
20 uM Staurosporine vs. DMSO	DSYGATSHLPNKGALAK	-0.963777	1.74578	PHF19	PHD finger protein 19	Q5T6S3	12	11.2978	10.8202	10.8422	10.7554	10.4139	9.49601	10.0415	9.90909	NO	NO
20 uM Staurosporine vs. DMSO	QNWSIMFESEK	1.18014	1.74572	FKBP15	FK506-binding protein 15	Q5T1M5	148	9.0866	9.18859	10.3752	9.29058	11.0478	10.2725	10.5763	10.765	NO	NO
20 uM Staurosporine vs. DMSO	VLNGMLPK	0.579962	1.74558	CYB5R4	Cytochrome b5 reductase 4	Q7L1T6	146	13.6941	13.1473	12.9817	12.986	13.9349	13.7775	13.8334	13.5832	NO	NO
20 uM Staurosporine vs. DMSO	VDEVPDGAVKPPTNKLPIFFFGTHETAFLGPK	-0.471887	1.74523	PSIP1	PC4 and SFRS1-interacting protein	O75475	25	14.5567	14.1324	13.9747	14.2914	13.7032	13.6561	14.0134	13.6949	NO	NO
20 uM Staurosporine vs. DMSO	NVESGEEELASKLDHYK	-1.40912	1.7444	PGAM5	Serine/threonine-protein phosphatase PGAM5, mitochondrial	Q96HS1	77	11.3512	10.5854	9.60137	10.6874	8.97771	8.87572	9.96171	8.77373	NO	NO
20 uM Staurosporine vs. DMSO	GSQHLIR	0.373778	1.74424	GINS4	DNA replication complex GINS protein SLD5	Q9BRT9	201	14.0931	14.1015	14.3072	14.4698	14.7327	14.6691	14.6442	14.4207	NO	NO
20 uM Staurosporine vs. DMSO	IILNSHSPAGSAAISQQDFHPK	-0.927638	1.7419	USP24	Ubiquitin carboxyl-terminal hydrolase 24	Q9UPU5	1606	12.3782	12.2888	11.8337	12.1919	11.0519	10.6728	11.4462	11.8112	NO	NO
20 uM Staurosporine vs. DMSO	GAGGFGGGGGTR	0.993926	1.73817	ALYREF	THO complex subunit 4	Q86V81	205	10.6276	11.2621	11.2447	10.8316	12.1013	12.4429	12.138	11.2595	NO	NO
20 uM Staurosporine vs. DMSO	KAQVSPQS	2.99827	1.738	SRRM1	Serine/arginine repetitive matrix protein 1	Q8IYB3	897	8.98658	13.9488	10.3785	13.0858	13.9057	14.7517	14.8047	14.9307	NO	NO
20 uM Staurosporine vs. DMSO	TPPRDLPTIPGVTSPSSDEPPMEASQSHLR	-0.492246	1.73739	EIF4EBP1	Eukaryotic translation initiation factor 4E-binding protein 1	Q13541	70	16.4512	15.8902	15.6666	16.0553	15.455	15.3823	15.7623	15.4949	NO	NO
20 uM Staurosporine vs. DMSO	QYFQTAEK	0.187768	1.73592	MRE11	Double-strand break repair protein MRE11	P49959	435	16.2083	16.1534	16.3013	16.1298	16.4196	16.3707	16.303	16.4507	NO	NO
20 uM Staurosporine vs. DMSO	LDYHKEQAAQLR	-1.67719	1.73577	RFC3	Replication factor C subunit 3	P40938	16	11.5871	11.4369	10.5212	11.2484	8.07326	10.1123	10.5417	9.35748	NO	NO
20 uM Staurosporine vs. DMSO	TTHFVEGGDAGNREDQINR	-0.217965	1.73572	RPL7	Large ribosomal subunit protein uL30	P18124	224	20.4232	20.2949	20.1317	20.3496	20.1705	20.1426	20.0444	19.9701	NO	NO
20 uM Staurosporine vs. DMSO	IANEVIGEMNLKPEEVFLAQGTLRPDLIESASLVASGK	-0.933976	1.73571	GMPS	GMP synthase [glutamine-hydrolyzing]	P49915	347	12.3912	12.5978	11.9429	12.609	10.776	11.536	11.5569	11.9361	NO	NO
20 uM Staurosporine vs. DMSO	ATAADSLFDR	0.72202	1.73493	DENND4C	DENN domain-containing protein 4C	Q5VZ89	592	13.2004	14.3193	13.5353	13.9142	14.6728	14.5337	14.1468	14.5039	NO	NO
20 uM Staurosporine vs. DMSO	LAVPASLDVCDNWLRPEPPGQEAR	-0.47974	1.7347	MICALL2	MICAL-like protein 2	Q8IY33	667	14.5606	14.4272	14.5363	14.5054	13.8528	13.6997	14.4186	14.1394	NO	NO
20 uM Staurosporine vs. DMSO	WLSDEHTGNSDNWR	0.799632	1.73448	TUT7	Terminal uridylyltransferase 7	Q5VYS8	101	11.8203	10.9884	11.7906	11.5044	12.5451	12.2721	12.4032	12.0818	NO	NO
20 uM Staurosporine vs. DMSO	DLLYFDGLR	0.27994	1.73429	PKP3	Plakophilin-3	Q9Y446	738	14.9571	15.2825	15.2515	15.1325	15.4239	15.5007	15.3191	15.4997	NO	NO
20 uM Staurosporine vs. DMSO	QPDISCILGTGGKSPR	-2.13133	1.73259	NUP107	Nuclear pore complex protein Nup107	P57740	73	12.2302	10.8572	11.782	13.3858	10.1681	8.95755	11.5447	9.05954	NO	NO
20 uM Staurosporine vs. DMSO	KVVVCDNGTGFVK	-0.280067	1.7323	ACTR2	Actin-related protein 2	P61160	7	15.2796	15.2734	15.2958	15.127	15.0195	15.0329	15.0532	14.7499	NO	NO
20 uM Staurosporine vs. DMSO	QMFGPQVLTTR	0.329603	1.73115	GPS2	G protein pathway suppressor 2	Q13227	152	14.6391	14.8439	14.8453	14.4406	14.9312	15.0731	15.0116	15.0714	NO	NO
20 uM Staurosporine vs. DMSO	SIPICTLK	0.177191	1.73074	UBA1	Ubiquitin-like modifier-activating enzyme 1	P22314	628	17.7165	17.6929	17.6757	17.6939	17.9661	17.8969	17.7131	17.9116	NO	NO
20 uM Staurosporine vs. DMSO	QLPTAAPDKTEVTGDHIPTPQDLPQR	-0.404142	1.73062	ARPP19	cAMP-regulated phosphoprotein 19	P56211	76	16.4339	15.9193	15.7534	16.0379	15.6128	15.6114	15.7297	15.574	NO	NO
20 uM Staurosporine vs. DMSO	VLSQEGEVDFLSSVEAQYIQAQAR	-0.358885	1.7301	FAM83A	Protein FAM83A	Q86UY5	53	14.7872	14.7795	14.9826	15.165	14.4816	14.4244	14.7127	14.66	NO	NO
20 uM Staurosporine vs. DMSO	LLHFVEAIQEVFSDNSTPLSNLSER	-1.43808	1.73003	STXBP4	Syntaxin-binding protein 4	Q6ZWJ1	430	12.7358	11.8645	11.8694	11.7561	10.3201	11.2753	11.4097	9.4684	NO	NO
20 uM Staurosporine vs. DMSO	SEVSSPIQR	0.38414	1.72937	PLEKHA5	Pleckstrin homology domain-containing family A member 5	Q9HAU0	564	14.7199	14.1936	14.3524	14.4492	14.7099	14.9565	14.7292	14.8561	NO	NO
20 uM Staurosporine vs. DMSO	KGTQCVEQIQELVLR	-0.176213	1.72917	BCCIP	BRCA2 and CDKN1A-interacting protein	Q9P287	137	17.3163	17.4145	17.214	17.4044	17.2262	17.1596	17.1496	17.109	NO	NO
20 uM Staurosporine vs. DMSO	MTLDQQHIETPGQNIPTK	1.01748	1.72912	QSER1	Glutamine and serine-rich protein 1	Q2KHR3	940	9.60193	8.72644	9.85371	9.39796	10.5111	10.4091	10.4227	10.3071	NO	NO
20 uM Staurosporine vs. DMSO	STCTYVGAAK	2.25184	1.72794	GMPR	GMP reductase 1	P36959	314	9.07542	10.3059	11.1295	8.87145	13.6565	10.9873	10.9915	12.7542	NO	NO
20 uM Staurosporine vs. DMSO	NLPEFAK	0.253438	1.72762	NELFCD	Negative elongation factor C/D	Q8IXH7	223	15.0227	14.9138	14.9524	15.0418	15.2721	15.3103	15.058	15.3041	NO	NO
20 uM Staurosporine vs. DMSO	AFAMIIDKLEEDISSSMTNSTAASRPPVTLR	-0.477293	1.72702	PCBP2	Poly(rC)-binding protein 2	Q15366	71	17.8747	17.1182	17.2051	17.3526	16.9706	16.7271	17.0713	16.8725	NO	NO
20 uM Staurosporine vs. DMSO	EQLWVDQQK	-2.89698	1.72643	FIGNL1	Fidgetin-like protein 1	Q6PIW4	300	14.1836	14.0433	13.6731	12.9526	8.8134	10.6792	13.9228	9.84919	NO	NO
20 uM Staurosporine vs. DMSO	WTCTSSGSSPQYNICEQMIQIR	-1.67419	1.72588	CYFIP1	Cytoplasmic FMR1-interacting protein 1	Q7L576	332	13.1447	12.3338	10.7339	10.8254	9.99836	10.4304	9.80146	10.111	NO	NO
20 uM Staurosporine vs. DMSO	VLAQYYTVTDEHHR	0.171032	1.72564	LYAR	Cell growth-regulating nucleolar protein	Q9NX58	336	16.6159	16.7436	16.7874	16.7961	16.9245	16.8581	16.8895	16.955	NO	NO
20 uM Staurosporine vs. DMSO	EHTALLKIEGVYAR	-0.688663	1.72543	RPL35A	Large ribosomal subunit protein eL33	P18077	23	13.8221	13.6493	13.4345	13.9001	13.4785	13.1927	12.8807	12.4995	NO	NO
20 uM Staurosporine vs. DMSO	LVAVGGQPR	-0.658135	1.72447	NAPRT	Nicotinate phosphoribosyltransferase	Q6XQN6	397	14.6363	14.7994	14.9374	14.8126	13.8116	13.6656	14.4171	14.6588	NO	NO
20 uM Staurosporine vs. DMSO	KEVAFFNNFLTDAK	-4.48801	1.72426	SRRT	Serrate RNA effector molecule homolog	Q9BXP5	745	15.1375	20.2045	20.1535	20.2254	15.2248	15.9237	15.9617	10.6587	NO	NO
20 uM Staurosporine vs. DMSO	YEVLTAEQILQHMVECIR	1.32616	1.72403	ARIH1	E3 ubiquitin-protein ligase ARIH1	Q9Y4X5	101	8.6518	7.34427	8.55112	8.92457	9.32351	10.1874	9.9003	9.3652	NO	NO
20 uM Staurosporine vs. DMSO	ETPPNGNLSPAPR	0.882337	1.7235	PRRC2A	Protein PRRC2A	P48634	996	14.5297	14.2455	14.9096	14.4886	15.3334	15.8001	14.5755	15.9938	NO	NO
20 uM Staurosporine vs. DMSO	IAVAAQNCYK	0.50209	1.72317	TPI1	Triosephosphate isomerase	P60174	60	13.2376	13.7778	13.648	13.1651	13.9822	13.8401	13.9778	14.0369	NO	NO
20 uM Staurosporine vs. DMSO	SRIADFQDVLK	-2.70821	1.72246	TBC1D13	TBC1 domain family member 13	Q9NVG8	7	13.9695	13.4793	13.8984	13.5956	10.4038	14.0877	9.21521	10.4032	NO	NO
20 uM Staurosporine vs. DMSO	KAAVEALQSQALHATSQQPLRK	-0.401948	1.72219	SEPTIN8	Septin-8	Q92599	402	14.5089	14.3737	14.101	14.3334	14.1542	13.8749	13.9342	13.746	NO	NO
20 uM Staurosporine vs. DMSO	EGGLGPLNIPLLADVTR	0.3375	1.72181	PRDX2	Peroxiredoxin-2	P32119	93	18.2581	18.6026	18.6206	18.552	18.6918	19.0413	18.6658	18.9844	NO	NO
20 uM Staurosporine vs. DMSO	DLLPGPVTLVMER	0.248293	1.72076	YRDC	Threonylcarbamoyl-AMP synthase	Q86U90	143	16.8259	17.079	17.1419	16.8375	17.2402	17.1652	17.1742	17.298	NO	NO
20 uM Staurosporine vs. DMSO	NTVTIQQEK	1.13479	1.7205	SASS6	Spindle assembly abnormal protein 6 homolog	Q6UVJ0	405	12.9438	13.7047	11.8231	13.4651	14.1023	14.1352	13.8329	14.4055	NO	NO
20 uM Staurosporine vs. DMSO	HSLPNSR	0.820926	1.72022	CLPP	ATP-dependent Clp protease proteolytic subunit, mitochondrial	Q16740	168	11.4731	12.1817	11.1543	12.0131	12.6725	12.5122	12.4809	12.4403	NO	NO
20 uM Staurosporine vs. DMSO	DMVDPVTGDKLTDRDIIVLQR	-0.573568	1.7198	NOSIP	Nitric oxide synthase-interacting protein	Q9Y314	258	13.8334	13.3036	13.4773	13.6255	12.6881	13.2236	13.201	12.8328	NO	NO
20 uM Staurosporine vs. DMSO	LAPASNMTSQRPVSSTGINFDNPSVQK	-1.93952	1.71958	NCOA5	Nuclear receptor coactivator 5	Q9HCD5	516	12.4324	11.156	10.8387	11.2408	10.9787	8.22058	8.7244	9.98623	NO	NO
20 uM Staurosporine vs. DMSO	NSSAQAFLGPENPEEPYLDGINYNCVAPGKR	-1.43584	1.71948	SMC1A	Structural maintenance of chromosomes protein 1A	Q14683	1091	13.4425	13.2922	12.7824	13.2785	10.238	12.0753	12.1504	12.5885	NO	NO
20 uM Staurosporine vs. DMSO	TVDVAAEK	0.225977	1.71818	SARNP	SAP domain-containing ribonucleoprotein	P82979	81	15.5024	15.4821	15.48	15.4987	15.7089	15.836	15.5471	15.7751	NO	NO
20 uM Staurosporine vs. DMSO	GSTAHFSGFESCSNGVISNK	-0.210975	1.71622	RANBP9	Ran-binding protein 9	Q96S59	502	15.3198	15.2067	15.3262	15.3959	15.0609	15.1303	15.1181	15.0953	NO	NO
20 uM Staurosporine vs. DMSO	CTYLNILLQTR	-1.19687	1.7154	PPP1R10	Serine/threonine-protein phosphatase 1 regulatory subunit 10	Q96QC0	48	10.5101	10.4081	9.16334	10.3061	9.14527	9.04328	8.47031	8.94129	NO	NO
20 uM Staurosporine vs. DMSO	ILNSCTDLMK	0.682418	1.71445	HIP1R	Huntingtin-interacting protein 1-related protein	O75146	823	13.1507	13.0446	12.417	13.1014	13.9283	13.6311	13.6885	13.1954	NO	NO
20 uM Staurosporine vs. DMSO	KAPGFGGFGSSAVSGGSTAAMITETIIETDKPK	-0.414992	1.71412	ARCN1	Coatomer subunit delta	P48444	179	16.2267	15.8126	15.6642	15.9823	15.3063	15.4152	15.7505	15.5538	NO	NO
20 uM Staurosporine vs. DMSO	VGKDELFALEQSCAQVVLQAANERNVSTR	-0.419492	1.71347	FSCN1	Fascin	Q16658	248	14.5351	14.1107	14.1368	14.5151	14.0293	13.7509	13.9479	13.8916	NO	NO
20 uM Staurosporine vs. DMSO	LMVSMLDR	0.794177	1.71339	SRI	Sorcin	P30626	77	13.8671	13.4257	13.6451	14.5472	14.6463	14.16	14.9404	14.9151	NO	NO
20 uM Staurosporine vs. DMSO	TLLPHDPTADVFVTPAEEKPIEIQWVKPEPK	-0.931083	1.71296	BRIX1	Ribosome biogenesis protein BRX1 homolog	Q8TDN6	296	15.474	14.9026	14.9495	14.345	14.0428	13.7123	14.7416	13.45	NO	NO
20 uM Staurosporine vs. DMSO	AAREPNIDR	0.207918	1.7128	EIF4B	Eukaryotic translation initiation factor 4B	P23588	79	16.1703	16.1148	16.1385	16.3156	16.4537	16.4648	16.3748	16.2776	NO	NO
20 uM Staurosporine vs. DMSO	YYSDLFSYCDIESTK	1.1785	1.71249	REPS1	RalBP1-associated Eps domain-containing protein 1	Q96D71	13	10.2735	11.5937	11.4684	12.2343	12.5208	12.4762	12.7759	12.5109	NO	NO
20 uM Staurosporine vs. DMSO	MEFVKCLGHPEEFYNLVR	0.528639	1.71198	FDFT1	Squalene synthase	P37268	1	12.5705	12.5068	13.0436	12.6512	13.1591	13.1696	13.3682	13.1898	NO	NO
20 uM Staurosporine vs. DMSO	VSLATEATR	-1.0759	1.71185	SCAPER	S phase cyclin A-associated protein in the endoplasmic reticulum	Q9BY12	285	12.4694	12.0504	11.9635	12.7434	11.6875	10.4478	11.7605	11.0273	NO	NO
20 uM Staurosporine vs. DMSO	ALDLENIMR	0.309634	1.71184	RNF138	E3 ubiquitin-protein ligase RNF138	Q8WVD3	72	15.8343	16.2322	16.3209	16.0251	16.3577	16.4263	16.4672	16.3999	NO	NO
20 uM Staurosporine vs. DMSO	RNQEIQQGEDAFPPSSPLFAEPYK	-1.97177	1.71178	AFF4	AF4/FMR2 family member 4	Q9UHB7	17	12.1654	13.7379	13.431	12.3895	11.8517	9.31915	10.5071	12.1587	NO	NO
20 uM Staurosporine vs. DMSO	AGSRLETVGSIFSR	0.846774	1.7115	MRPS23	Small ribosomal subunit protein mS23	Q9Y3D9	2	9.59725	9.49526	9.15425	9.39327	10.2175	10.3195	10.3195	10.1706	NO	NO
20 uM Staurosporine vs. DMSO	LYLLQGIR	0.167959	1.71135	NUB1	NEDD8 ultimate buster 1	Q9Y5A7	342	17.6126	17.7279	17.8573	17.7339	17.86	17.9065	17.9217	17.9153	NO	NO
20 uM Staurosporine vs. DMSO	YALPLVGHR	0.890913	1.71104	PDIA4	Protein disulfide-isomerase A4	P13667	392	15.0193	13.6734	13.849	14.657	15.3568	14.9026	15.4721	15.0308	NO	NO
20 uM Staurosporine vs. DMSO	ALMEAVSHAK	0.629583	1.70978	ARFGEF2	Brefeldin A-inhibited guanine nucleotide-exchange protein 2	Q9Y6D5	869	12.8723	13.8917	13.4061	13.559	13.9312	14.002	14.2166	14.0976	NO	NO
20 uM Staurosporine vs. DMSO	KLGLCEFPDNDQFSNLEALLIQIGPK	-1.20218	1.70946	MSH2	DNA mismatch repair protein Msh2	P43246	172	10.6504	10.2533	9.25847	10.5359	9.28561	8.98535	8.53682	9.08164	NO	NO
20 uM Staurosporine vs. DMSO	KITINPGCVVVDGMPPGVSFK	-0.51645	1.70888	GTF2I	General transcription factor II-I	P78347	896	15.7771	15.7447	15.6049	15.9352	15.4784	14.7736	15.597	15.1471	NO	NO
20 uM Staurosporine vs. DMSO	LSNKVEAIDVEEAKR	-0.289807	1.70856	MCM4	DNA replication licensing factor MCM4	P33991	749	17.3304	17.1704	17.0775	17.4354	17.0494	17.0723	16.7626	16.9702	NO	NO
20 uM Staurosporine vs. DMSO	ETIEQEK	0.404739	1.70726	TMSB10	Thymosin beta-10	P63313	33	16.4644	16.3888	16.4381	16.0104	16.8375	16.7437	16.4128	16.9265	NO	NO
20 uM Staurosporine vs. DMSO	IVNLGSSK	0.289775	1.70672	PHF5A	PHD finger-like domain-containing protein 5A	Q7RTV0	88	15.5637	15.2124	15.2993	15.5745	15.6485	15.6907	15.6908	15.7789	NO	NO
20 uM Staurosporine vs. DMSO	TTGTPPDSSLVTYELHSRPEQDKFSQAAK	-0.578419	1.70658	DCTN2	Dynactin subunit 2	Q13561	195	16.512	15.8904	15.4839	16.1066	15.346	15.2822	15.5805	15.4706	NO	NO
20 uM Staurosporine vs. DMSO	ACMTYFPR	1.89633	1.70591	PELP1	Proline-, glutamic acid- and leucine-rich protein 1	Q8IZL8	201	11.9653	11.1351	9.14973	10.3377	12.2532	11.5735	12.914	13.4324	NO	NO
20 uM Staurosporine vs. DMSO	EYAENIGDGR	0.21735	1.7059	CTNNBL1	Beta-catenin-like protein 1	Q8WYA6	535	16.2562	16.0328	16.1325	16.1835	16.3208	16.3185	16.3205	16.5146	NO	NO
20 uM Staurosporine vs. DMSO	MLSHLLQALDYGAPPHGGIALGLDR	-1.58502	1.70502	DARS2	Aspartate--tRNA ligase, mitochondrial	Q6PI48	563	12.6523	12.0377	12.0746	10.5181	9.26275	10.707	10.1973	10.7755	NO	NO
20 uM Staurosporine vs. DMSO	MFHGIPATPGIGAPGNKPELYEEVK	-0.234824	1.70453	VPS28	Vacuolar protein sorting-associated protein 28 homolog	Q9UK41	1	16.253	16.0307	15.9361	16.0834	15.9327	15.7913	15.8246	15.8153	NO	NO
20 uM Staurosporine vs. DMSO	AAAGGQGSAVAAEAEPGKEEPPAR	-0.769183	1.70425	EGLN1	Egl nine homolog 1	Q9GZT9	129	12.5555	12.3499	12.0812	11.8086	11.2461	11.4064	11.3121	11.7539	NO	NO
20 uM Staurosporine vs. DMSO	NRLEALASPQIVAAFTSQAVDQSK	2.65227	1.7028	COG7	Conserved oligomeric Golgi complex subunit 7	P83436	182	10.9543	12.4705	10.524	13.1026	12.293	16.3519	13.9027	15.1128	NO	NO
20 uM Staurosporine vs. DMSO	MLIEKDPSLEK	1.65446	1.70265	PPHLN1	Periphilin-1	Q8NEY8	318	11.0263	10.1337	12.3932	9.61601	12.7839	12.2026	12.4186	12.382	NO	NO
20 uM Staurosporine vs. DMSO	SFMMEVKDPNMK	1.41293	1.7016	RBBP6	E3 ubiquitin-protein ligase RBBP6	Q7Z6E9	197	11.8872	11.3676	11.3193	10.8455	11.8501	12.0444	13.7579	13.4189	NO	NO
20 uM Staurosporine vs. DMSO	ELVQNLLDGKIEAEDFTSR	-0.453254	1.70118	TAF4	Transcription initiation factor TFIID subunit 4	O00268	622	13.9915	13.6369	13.499	13.7138	13.3419	13.3873	13.1478	13.1511	NO	NO
20 uM Staurosporine vs. DMSO	LAHGGQVNLDMEDHRDEDFVKPK	-0.478228	1.70098	NSFL1C	NSFL1 cofactor p47	Q9UNZ2	225	15.1141	14.7716	14.508	14.4399	14.2776	14.077	14.4077	14.1583	NO	NO
20 uM Staurosporine vs. DMSO	TGSGGVASSSESNR	0.364067	1.70092	SF3A2	Splicing factor 3A subunit 2	Q15428	11	14.4885	14.4872	14.0539	14.2795	14.5529	14.7807	14.7014	14.7303	NO	NO
20 uM Staurosporine vs. DMSO	CTLDQAFR	0.24085	1.70008	THOC1	THO complex subunit 1	Q96FV9	49	15.8602	16.1541	15.9115	15.9839	16.247	16.3107	16.0957	16.2197	NO	NO
20 uM Staurosporine vs. DMSO	SDFDEFER	0.156246	1.69994	U2AF2	Splicing factor U2AF 65 kDa subunit	P26368	2	18.6186	18.4718	18.5714	18.4476	18.7628	18.6504	18.6699	18.6514	NO	NO
20 uM Staurosporine vs. DMSO	TLTPISAAYAR	0.374012	1.69952	ATIC	Bifunctional purine biosynthesis protein ATIC	P31939	295	15.916	15.9052	16.0914	15.5543	16.4276	16.1023	16.1008	16.3321	NO	NO
20 uM Staurosporine vs. DMSO	SPMVEQAVQTGSADNLNAK	-0.435591	1.69882	LSM14B	Protein LSM14 homolog B	Q9BX40	154	14.1021	13.8805	14.0093	13.6055	13.4121	13.5889	13.5227	13.3313	NO	NO
20 uM Staurosporine vs. DMSO	SQPVTLPEAR	0.28262	1.69867	MICAL3	[F-actin]-monooxygenase MICAL3	Q7RTP6	1225	15.862	15.7381	15.5653	15.9826	15.9732	16.1479	16.1144	16.0428	NO	NO
20 uM Staurosporine vs. DMSO	KVVKEPETR	-1.96067	1.69826	KNOP1	Lysine-rich nucleolar protein 1	Q1ED39	20	11.0861	10.706	13.5247	13.1569	9.52179	10.3654	10.3567	10.3872	NO	NO
20 uM Staurosporine vs. DMSO	AIEMEENR	-1.91488	1.69775	HAUS6	HAUS augmin-like complex subunit 6	Q7Z4H7	599	12.8344	12.002	12.0825	12.2259	9.77052	9.66853	12.4796	9.56654	NO	NO
20 uM Staurosporine vs. DMSO	SPIKESLFR	1.31333	1.69746	GOLGA4	Golgin subfamily A member 4	Q13439	78	8.94334	9.04532	10.3353	9.14731	10.3081	10.4101	11.4942	10.5121	NO	NO
20 uM Staurosporine vs. DMSO	HQVCPELELEASWPTHPHR	0.822021	1.69536	ZZEF1	Zinc finger ZZ-type and EF-hand domain-containing protein 1	O43149	1256	12.6818	11.7005	12.3942	12.8178	13.0404	12.9751	13.5578	13.3092	NO	NO
20 uM Staurosporine vs. DMSO	KTLLVPTPR	-1.61018	1.69479	MTHFSD	Methenyltetrahydrofolate synthase domain-containing protein	Q2M296	82	10.8044	10.9063	12.1514	12.5573	10.5987	9.99719	8.9112	10.4716	NO	NO
20 uM Staurosporine vs. DMSO	TAIEAFNETIK	-0.314301	1.69447	PIK3R1	Phosphatidylinositol 3-kinase regulatory subunit alpha	P27986	482	15.1374	15.1025	15.2523	15.3521	14.9273	15.0582	14.6597	14.9419	NO	NO
20 uM Staurosporine vs. DMSO	MVLSVFSPYWLINK	-1.60761	1.69436	VPS13C	Intermembrane lipid transfer protein VPS13C	Q709C8	2764	10.2644	11.3946	9.40685	11.8105	9.01596	8.74276	9.46729	9.21994	NO	NO
20 uM Staurosporine vs. DMSO	KVIELPNIQKVEVYPVELLLVR	-0.772997	1.69432	USP11	Ubiquitin carboxyl-terminal hydrolase 11	P51784	182	11.8238	11.8288	11.791	11.9348	11.0283	11.2777	11.3788	10.6017	NO	NO
20 uM Staurosporine vs. DMSO	ALQLQLDGNGK	-1.78744	1.69333	HPS6	BLOC-2 complex member HPS6	Q86YV9	524	11.6724	12.8037	11.7688	12.876	10.4805	8.90279	11.7522	10.8357	NO	NO
20 uM Staurosporine vs. DMSO	QQHEAAALNAVQR	1.33369	1.693	ANKRD11	Ankyrin repeat domain-containing protein 11	Q6UB99	2609	8.97415	9.07614	10.7307	9.17813	10.8881	10.6111	10.5901	11.2046	NO	NO
20 uM Staurosporine vs. DMSO	GMLSAITNVVQNTGK	1.43833	1.69276	FAM114A1	Protein NOXP20	Q8IWE2	207	9.61239	11.7414	10.4944	9.68776	11.4646	12.0038	11.7399	12.081	NO	NO
20 uM Staurosporine vs. DMSO	LYFGALFK	2.66463	1.69246	CASS4	Cas scaffolding protein family member 4	Q9NQ75	678	9.36473	9.26274	10.933	12.8186	12.3411	14.4039	11.9428	14.3499	NO	NO
20 uM Staurosporine vs. DMSO	SKPVETPPEQNGTLTSQPNNR	-0.270118	1.69224	SNAP29	Synaptosomal-associated protein 29	O95721	125	17.9443	17.6824	17.9257	17.6851	17.4335	17.4213	17.7142	17.5882	NO	NO
20 uM Staurosporine vs. DMSO	AASAIYSGYIFDYDYYRDDFYDR	-2.96979	1.69186	RALY	RNA-binding protein Raly	Q9UKM9	104	12.9706	14.295	9.61339	13.9803	10.956	8.91141	10.0994	9.0134	NO	NO
20 uM Staurosporine vs. DMSO	ENLIAELEEK	0.239329	1.6899	SUDS3	Sin3 histone deacetylase corepressor complex component SDS3	Q9H7L9	148	14.8557	14.7795	14.7665	14.6167	14.9663	15.028	15.0207	14.9607	NO	NO
20 uM Staurosporine vs. DMSO	TGVFLTWNECR	0.546586	1.68916	RNASEH1	Ribonuclease H1	O60930	37	12.908	12.493	12.4146	12.3815	13.0763	13.2402	12.9535	13.1136	NO	NO
20 uM Staurosporine vs. DMSO	SHIPLAFDPTSIPR	0.302699	1.68891	NCOR2	Nuclear receptor corepressor 2	Q9Y618	1626	14.5867	14.3331	14.4245	14.4902	14.6227	14.7968	14.9274	14.6983	NO	NO
20 uM Staurosporine vs. DMSO	NPHLITNWGPAAFTEAELEER	-1.5897	1.68889	SWAP70	Switch-associated protein 70	Q9UH65	554	10.9561	10.8541	11.1548	11.8284	8.85871	9.35868	11.1544	9.06269	NO	NO
20 uM Staurosporine vs. DMSO	EGAQVPTGR	0.630308	1.68868	MDC1	Mediator of DNA damage checkpoint protein 1	Q14676	664	15.5072	14.9016	14.7028	14.9765	15.522	15.2975	15.6542	16.1357	NO	NO
20 uM Staurosporine vs. DMSO	ENLPVSSDGNLPQQAASAPSR	-0.620177	1.68853	TP53BP2	Apoptosis-stimulating of p53 protein 2	Q13625	323	13.067	13.1509	12.7945	13.2332	12.3421	12.6088	12.0733	12.7408	NO	NO
20 uM Staurosporine vs. DMSO	LVSELSGGTGGDEEEEWLYGGPWDVHVHSDLAK	-1.39297	1.6885	FIP1L1	Pre-mRNA 3'-end-processing factor FIP1	Q6UN15	9	13.5182	12.7652	12.9007	13.6751	10.5046	12.8067	12.1222	11.8537	NO	NO
20 uM Staurosporine vs. DMSO	IQLEEIECAVLNDREALTIR	-1.19884	1.68835	AFTPH	Aftiphilin	Q6ULP2	243	12.4548	11.7765	11.3695	11.8962	11.2176	10.5924	11.1458	9.74584	NO	NO
20 uM Staurosporine vs. DMSO	RLEASDGGLDSAELAAELGMEHQAVVGAVK	-0.496237	1.68638	FARSA	Phenylalanine--tRNA ligase alpha subunit	Q9Y285	13	17.2599	16.5101	16.4559	16.7915	16.3673	16.0906	16.3582	16.2163	NO	NO
20 uM Staurosporine vs. DMSO	YGGEEEDQPIYLAVK	-0.605523	1.68477	NENF	Neudesin	Q9UMX5	55	12.6333	12.667	12.4823	12.4227	11.6652	11.9931	11.9246	12.2004	NO	NO
20 uM Staurosporine vs. DMSO	RVENSIPAAGETQNVEVAAGPAGK	-0.423317	1.68472	SART3	Squamous cell carcinoma antigen recognized by T-cells 3	Q15020	646	17.8041	17.297	17.1602	17.768	17.0784	16.9989	17.1191	17.1396	NO	NO
20 uM Staurosporine vs. DMSO	LSVNSVTAGDYSRPLHISTFINELDSGFR	-1.03889	1.68417	TSN	Translin	Q15631	154	11.1459	10.2866	10.1051	10.1996	9.43535	9.33336	9.08447	9.72843	NO	NO
20 uM Staurosporine vs. DMSO	KVVEFLAMLK	0.432996	1.68388	MAGEC1	Melanoma-associated antigen C1	O60732	1083	13.9013	14.143	13.7523	13.9376	14.6566	14.1896	14.1678	14.4522	NO	NO
20 uM Staurosporine vs. DMSO	LNQQMAK	0.601724	1.68363	SRP54	Signal recognition particle subunit SRP54	P61011	458	12.8912	12.3494	12.3415	12.4356	13.1114	13.4095	12.9708	12.9328	NO	NO
20 uM Staurosporine vs. DMSO	GLLQTEPQNNQAK	0.171431	1.6836	FIS1	Mitochondrial fission 1 protein	Q9Y3D6	96	15.5058	15.5061	15.4413	15.4437	15.6382	15.6452	15.6202	15.679	NO	NO
20 uM Staurosporine vs. DMSO	SLAYLTAATHGLDEEAESLKETFDPEKETIPDIDPNAK	-0.899029	1.68349	COPA	Coatomer subunit alpha	P53621	756	15.7831	14.1662	14.6326	14.9363	13.9459	13.9074	14.2646	13.8043	NO	NO
20 uM Staurosporine vs. DMSO	SVEEFMDSSVEDSKK	-0.528701	1.68231	GCFC2	Intron Large complex component GCFC2	P16383	527	16.881	16.2848	16.5123	16.1172	15.7518	16.2184	15.6713	16.0391	NO	NO
20 uM Staurosporine vs. DMSO	RGQTVNAGVAER	-1.24108	1.68113	MEN1	Menin	O00255	207	10.0294	9.63135	9.50512	10.0172	8.76349	9.43339	8.24176	7.78003	NO	NO
20 uM Staurosporine vs. DMSO	LPVWETIVCTMR	0.736184	1.68078	AIP	AH receptor-interacting protein	O00170	70	12.7309	12.1861	13.2536	12.5305	13.7324	13.2084	13.2528	13.4522	NO	NO
20 uM Staurosporine vs. DMSO	LATQLTGPVMPVR	0.1354	1.68058	RPL13	Large ribosomal subunit protein eL13	P26373	146	22.0559	22.1031	22.1109	22.101	22.1554	22.2841	22.2668	22.2061	NO	NO
20 uM Staurosporine vs. DMSO	QVASPFTLIIDDPSGNSFVENPHAPQKDDALVITHYNR	-0.856971	1.68	ZPR1	Zinc finger protein ZPR1	O75312	187	15.1549	14.4705	13.6132	14.7356	13.7804	13.6439	13.4449	13.677	NO	NO
20 uM Staurosporine vs. DMSO	LSQVPMSALK	0.252637	1.67998	NUFIP2	FMR1-interacting protein NUFIP2	Q7Z417	398	17.0907	17.167	17.3635	17.41	17.3641	17.508	17.5898	17.5799	NO	NO
20 uM Staurosporine vs. DMSO	ANGEVLPTPGQETPTPIHDLSASDFLK	-1.11946	1.67983	LYSMD1	LysM and putative peptidoglycan-binding domain-containing protein 1	Q96S90	133	12.4749	13.1403	12.5182	13.1671	12.0274	10.9059	12.5306	11.3586	NO	NO
20 uM Staurosporine vs. DMSO	ITAFVPNDGCLNFIEENDEVLVAGFGRK	-0.220448	1.67937	RPS23	Small ribosomal subunit protein uS12	P62266	81	16.3275	16.178	16.2295	16.478	16.0184	16.0914	16.1327	16.0887	NO	NO
20 uM Staurosporine vs. DMSO	NYLCYDLAELLLK	-1.44047	1.67868	TTC21B	Tetratricopeptide repeat protein 21B	Q7Z4L5	789	11.2713	11.1686	12.2007	11.081	10.4437	8.8248	10.8422	9.84913	NO	NO
20 uM Staurosporine vs. DMSO	MFQVPDSEGGR	0.180119	1.67842	JPT2	Jupiter microtubule associated homolog 2	Q9H910	1	18.8202	18.8879	18.7508	18.6722	19.0064	19.0535	18.8703	18.9213	NO	NO
20 uM Staurosporine vs. DMSO	ANDKGFYSSQAIEK	1.26946	1.6782	SMCR8	Guanine nucleotide exchange protein SMCR8	Q8TEV9	219	10.5872	9.12609	10.1101	9.0241	10.5867	11.0594	10.88	11.3992	NO	NO
20 uM Staurosporine vs. DMSO	SSAGISSMPNITVGTQVCLR	-0.42197	1.67771	UBR5	E3 ubiquitin-protein ligase UBR5	O95071	518	14.4163	14.2522	14.4806	14.5616	14.0895	13.7387	13.8929	14.3016	NO	NO
20 uM Staurosporine vs. DMSO	FAEMEER	0.273459	1.67723	CHD4	Chromodomain-helicase-DNA-binding protein 4	Q14839	605	16.1813	16.0011	16.236	15.8108	16.3414	16.3199	16.3462	16.3156	NO	NO
20 uM Staurosporine vs. DMSO	ITVHKELELQFDLGNLLASDRNPPTGLR	-0.77923	1.67638	RRS1	Ribosome biogenesis regulatory protein homolog	Q15050	24	13.9725	13.2806	13.2264	13.5786	12.9956	12.6395	13.144	12.162	NO	NO
20 uM Staurosporine vs. DMSO	AAIPPPVYEEQDRPR	-1.26019	1.67567	RBM17	Splicing factor 45	Q96I25	207	14.2529	14.2428	13.3333	14.024	13.6318	12.0005	13.2983	11.8817	NO	NO
20 uM Staurosporine vs. DMSO	SGYQDMPEYENFR	0.459112	1.6755	SEC23A	Protein transport protein Sec23A	Q15436	670	14.1732	14.3763	14.2995	13.6862	14.7084	14.5855	14.578	14.4997	NO	NO
20 uM Staurosporine vs. DMSO	GKPEIVGSNLDTLVSIGLDEKFPQDYR	-0.592556	1.67521	NCAPD2	Condensin complex subunit 1	Q15021	784	15.4259	14.8359	14.5801	15.174	14.6345	14.3334	14.6013	14.0764	NO	NO
20 uM Staurosporine vs. DMSO	RHYNGEAYEDDEHHPR	-0.622613	1.67445	DNAJA1	DnaJ homolog subfamily A member 1	P31689	374	12.1149	12.5014	12.1985	12.3872	11.5645	11.5503	11.8284	11.7683	NO	NO
20 uM Staurosporine vs. DMSO	LLSLHIGACESIMKK	-1.43608	1.67413	VPS33B	Vacuolar protein sorting-associated protein 33B	Q9H267	340	9.45583	11.0995	10.3378	9.25186	8.21009	8.32345	9.24641	8.62076	NO	NO
20 uM Staurosporine vs. DMSO	VDVFREDLCTKTENLLGSYFPK	-0.270689	1.67304	PSME1	Proteasome activator complex subunit 1	Q06323	14	15.9772	15.7808	15.7993	16.0232	15.5058	15.5082	15.7407	15.743	NO	NO
20 uM Staurosporine vs. DMSO	SGFLGTNPAPR	0.237425	1.67289	DERPC	Decreased expression in renal and prostate cancer protein	P0CG12	215	18.1458	18.3326	18.4219	18.2587	18.337	18.6453	18.5707	18.5556	NO	NO
20 uM Staurosporine vs. DMSO	QAGEVTYADAHK	0.198942	1.67284	SRSF6	Serine/arginine-rich splicing factor 6	Q13247	132	17.2846	17.2223	17.2492	17.1639	17.4249	17.2537	17.5196	17.5175	NO	NO
20 uM Staurosporine vs. DMSO	GHFDYQSLLMR	0.31384	1.67244	UBE2Z	Ubiquitin-conjugating enzyme E2 Z	Q9H832	306	13.7426	13.8904	13.8251	13.7724	13.9962	14.2247	14.0853	14.1797	NO	NO
20 uM Staurosporine vs. DMSO	FGLSAAEDITPR	0.462532	1.67232	PAXX	Protein PAXX	Q9BUH6	64	14.1359	14.7541	14.5082	14.8207	14.8118	15.1301	15.0449	15.0824	NO	NO
20 uM Staurosporine vs. DMSO	NITAQVSIQNNLFEEQERQER	-0.288066	1.67122	TRAFD1	TRAF-type zinc finger domain-containing protein 1	O14545	203	15.9115	15.6759	15.62	15.859	15.4498	15.3564	15.6777	15.4303	NO	NO
20 uM Staurosporine vs. DMSO	TFKPAIQELKPPTYK	0.423674	1.6708	MRPS22	Small ribosomal subunit protein mS22	P82650	90	14.7536	14.7424	14.7115	14.3948	14.7796	15.3028	14.9435	15.2711	NO	NO
20 uM Staurosporine vs. DMSO	TPPPAAVAQR	0.615617	1.6701	TJAP1	Tight junction-associated protein 1	Q5JTD0	422	13.2319	13.1491	13.1333	13.8989	13.8572	14.1326	13.6897	14.1961	NO	NO
20 uM Staurosporine vs. DMSO	QIAEEDFYEKLAASIAPEIYGHEDVKK	-0.386388	1.66934	MCM7	DNA replication licensing factor MCM7	P33993	326	16.33	15.7659	15.6998	15.8415	15.5491	15.5396	15.5584	15.4444	NO	NO
20 uM Staurosporine vs. DMSO	ALMTVGKEPFPTIYVDSQKENER	-0.261429	1.66877	NARS1	Asparagine--tRNA ligase, cytoplasmic	O43776	32	18.9998	18.6772	18.5519	18.6902	18.4356	18.4168	18.5492	18.4717	NO	NO
20 uM Staurosporine vs. DMSO	QLTLNGIYTHITK	2.09281	1.66863	FOXK2	Forkhead box protein K2	Q01167	278	8.80094	8.90292	11.3077	9.00491	10.8008	10.5582	12.3637	12.6651	NO	NO
20 uM Staurosporine vs. DMSO	MSLENDKILQIITELIKTENN	1.64779	1.66787	DHX29	ATP-dependent RNA helicase DHX29	Q7Z478	1349	8.43248	8.99782	7.78621	7.06507	8.77288	10.4633	9.27529	10.3613	NO	NO
20 uM Staurosporine vs. DMSO	IWNHPDVLYEALQK	1.8685	1.66778	RAD54L2	Helicase ARIP4	Q9Y4B4	621	9.42788	10.5913	12.0996	9.64472	11.6636	13.344	12.478	11.752	NO	NO
20 uM Staurosporine vs. DMSO	NVEGQDMLYQSLK	-1.71805	1.66696	AP2B1	AP-2 complex subunit beta	P63010	880	12.7085	11.6926	12.1807	12.8175	11.399	11.7963	10.2089	9.12294	NO	NO
20 uM Staurosporine vs. DMSO	ERVEAGDVIYIEANSGAVKR	-0.220645	1.66651	RUVBL1	RuvB-like 1	Q9Y265	183	19.1631	19.0036	18.8685	19.2117	18.8907	18.8065	18.7958	18.8714	NO	NO
20 uM Staurosporine vs. DMSO	VLKETCDQK	1.03013	1.66623	BRAP	BRCA1-associated protein	Q7Z569	514	9.83926	9.9369	10.4139	11.0345	11.5777	11.587	11.0501	11.1302	NO	NO
20 uM Staurosporine vs. DMSO	VVSCLAEGVSHVIIGEDHSR	-1.20079	1.66607	LIG4	DNA ligase 4	P49917	852	10.4877	10.5897	9.60569	10.6917	8.97339	8.8714	9.95739	8.76941	NO	NO
20 uM Staurosporine vs. DMSO	RGFGFVTFDDHDPVDKIVLQK	-0.226097	1.66535	HNRNPA2B1	Heterogeneous nuclear ribonucleoproteins A2/B1	P22626	153	17.0273	16.8424	16.6652	16.9318	16.6391	16.6364	16.6767	16.6101	NO	NO
20 uM Staurosporine vs. DMSO	MLAPEGALNIHEK	1.81619	1.66507	PITPNA	Phosphatidylinositol transfer protein alpha isoform	Q00169	74	11.4596	9.17291	9.16921	10.7473	12.8293	12.1112	11.9185	10.9548	NO	NO
20 uM Staurosporine vs. DMSO	DIKPQLELIEDEEKLKETEPVEAYVIQK	-0.967342	1.66449	MAP1B	Microtubule-associated protein 1B	P46821	853	13.3874	12.3357	12.9361	13.084	11.2549	12.1444	12.5182	11.9564	NO	NO
20 uM Staurosporine vs. DMSO	SREPQAKPQLDLSIDSLDLSCEEGTPLSITSKLPR	-1.60786	1.66445	NUMA1	Nuclear mitotic apparatus protein 1	Q14980	1709	11.724	10.7001	10.0691	10.5981	8.02567	9.11472	10.3027	9.2167	NO	NO
20 uM Staurosporine vs. DMSO	ELNVITETQCTLGLTALR	1.16003	1.66413	PHF10	PHD finger protein 10	Q8WUB8	125	9.65788	8.92671	10.2167	9.0287	10.7402	11.0003	10.6369	10.0927	NO	NO
20 uM Staurosporine vs. DMSO	TAFSENEDDESRPAVALIR	-2.05362	1.66249	HECTD1	E3 ubiquitin-protein ligase HECTD1	Q9ULT8	948	13.7183	11.9497	12.1401	11.5756	10.0687	10.6056	11.8187	8.67615	NO	NO
20 uM Staurosporine vs. DMSO	EREPGAAGVR	1.31082	1.66236	NOC4L	Nucleolar complex protein 4 homolog	Q9BVI4	2	9.96537	9.59157	9.08336	10.5369	10.9125	11.4475	11.7699	10.2906	NO	NO
20 uM Staurosporine vs. DMSO	NFHIFYQLLEGGEEETLRR	-1.45378	1.66217	MYO1C	Unconventional myosin-Ic	O00159	236	9.82644	11.3628	10.1431	9.88298	7.89707	9.0191	9.56972	8.91429	NO	NO
20 uM Staurosporine vs. DMSO	ATVTAMIAR	0.227944	1.66156	STAU1	Double-stranded RNA-binding protein Staufen homolog 1	O95793	449	16.4352	16.5363	16.6966	16.3439	16.7093	16.6941	16.729	16.7915	NO	NO
20 uM Staurosporine vs. DMSO	NMGKPAQPALSREELEALFLPYDLK	-0.463141	1.6613	NAT10	RNA cytidine acetyltransferase	Q9H0A0	799	14.2296	13.8961	13.656	14.1149	13.722	13.4075	13.473	13.4415	NO	NO
20 uM Staurosporine vs. DMSO	LVDPQEMLR	0.169677	1.66126	FDXR	NADPH:adrenodoxin oxidoreductase, mitochondrial	P22570	479	16.7712	16.6486	16.6904	16.5927	16.9334	16.8411	16.7993	16.8078	NO	NO
20 uM Staurosporine vs. DMSO	ITGMLLEIDNSELLHMLESPESLR	-0.51076	1.66126	PABPC1	Polyadenylate-binding protein 1	P11940	581	14.8519	14.6128	14.2344	15.1119	14.1974	14.2194	14.1128	14.2383	NO	NO
20 uM Staurosporine vs. DMSO	LTSTSAITR	0.569195	1.66035	PACS1	Phosphofurin acidic cluster sorting protein 1	Q6VY07	318	13.4986	14.0651	13.4173	13.9019	13.9313	14.2894	14.3526	14.5863	NO	NO
20 uM Staurosporine vs. DMSO	NELHNLLDKPQLQGIPVLVLGNKR	-0.712673	1.66013	ARL8B	ADP-ribosylation factor-like protein 8B	Q9NVJ2	109	11.9346	12.1094	12.4377	12.6238	11.5659	11.4583	11.8152	11.4155	NO	NO
20 uM Staurosporine vs. DMSO	GLEEIPVFDISEK	0.199856	1.65976	RIF1	Telomere-associated protein RIF1	Q5UIP0	2370	17.0079	17.179	17.1337	17.071	17.1583	17.4279	17.2688	17.3361	NO	NO
20 uM Staurosporine vs. DMSO	GLIPVFALGR	0.332846	1.65957	CPSF3	Cleavage and polyadenylation specificity factor subunit 3	Q9UKF6	236	15.1523	15.5069	15.5322	15.4322	15.6715	15.9634	15.5704	15.7496	NO	NO
20 uM Staurosporine vs. DMSO	TSASIILR	0.235521	1.6589	TCP1	T-complex protein 1 subunit alpha	P17987	371	18.6681	18.9091	19.0253	18.9437	18.9974	19.2114	19.1353	19.144	NO	NO
20 uM Staurosporine vs. DMSO	AENIMASLER	0.325316	1.65853	DOCK11	Dedicator of cytokinesis protein 11	Q5JSL3	300	14.771	14.7297	15.0064	14.5159	15.1278	15.0446	15.1616	14.9902	NO	NO
20 uM Staurosporine vs. DMSO	LAAIIPDPVVAPSIVPVLKDEVDR	-0.848792	1.65801	CSTF3	Cleavage stimulation factor subunit 3	Q12996	554	12.4501	13.0784	12.9132	13.1787	11.4133	12.5804	12.1349	12.0967	NO	NO
20 uM Staurosporine vs. DMSO	QLLLDTTDKFR	-1.13088	1.6577	SPTBN2	Spectrin beta chain, non-erythrocytic 2	O15020	1901	10.9467	10.8448	9.55479	10.7428	9.58193	9.47995	9.12572	9.37796	NO	NO
20 uM Staurosporine vs. DMSO	MDDKELIEYFK	0.398016	1.65761	EIF2B1	Translation initiation factor eIF2B subunit alpha	Q14232	1	13.3462	13.5164	13.1974	13.2527	13.8869	13.7582	13.6627	13.5971	NO	NO
20 uM Staurosporine vs. DMSO	RVQIEAAQCPDVVVAQIDPK	-0.270992	1.65744	GEMIN2	Gem-associated protein 2	O14893	55	15.5334	15.2529	15.2294	15.3069	14.9769	15.012	15.1955	15.0542	NO	NO
20 uM Staurosporine vs. DMSO	LMDFLLQR	0.744162	1.65672	RMC1	Regulator of MON1-CCZ1 complex	Q96DM3	376	11.437	12.0535	11.6839	11.4539	12.029	12.679	12.2832	12.6139	NO	NO
20 uM Staurosporine vs. DMSO	AAQDLCEEALR	0.119858	1.65622	PRPF6	Pre-mRNA-processing factor 6	O94906	693	18.9734	18.9192	18.8922	18.9293	19.0082	19.1188	19.0245	19.042	NO	NO
20 uM Staurosporine vs. DMSO	VRDNICGALAR	0.610373	1.65616	IPO4	Importin-4	Q8TEX9	957	12.6201	12.3727	12.0017	12.1922	12.9491	13.0851	12.617	12.9771	NO	NO
20 uM Staurosporine vs. DMSO	TYEDLKR	0.365956	1.65611	SF3A3	Splicing factor 3A subunit 3	Q12874	491	17.7032	17.2914	17.1131	17.4543	17.863	17.6829	17.5885	17.8915	NO	NO
20 uM Staurosporine vs. DMSO	EMYSLCLLATLMGEDVWSYAK	1.40232	1.65557	VCPIP1	Deubiquitinating protein VCPIP1	Q96JH7	892	8.13663	9.07788	10.0619	8.97589	10.6349	10.7369	9.6509	10.8389	NO	NO
20 uM Staurosporine vs. DMSO	VALDMTTLTIMR	0.288387	1.65511	PSMC6	26S proteasome regulatory subunit 10B	P62333	98	16.4871	16.4778	16.3961	16.1325	16.8519	16.5361	16.655	16.6041	NO	NO
20 uM Staurosporine vs. DMSO	AAMTDAMVPR	0.395977	1.65504	RAI14	Ankycorbin	Q9P0K7	777	14.2715	14.631	14.5019	14.0838	14.9443	14.65	14.7563	14.7215	NO	NO
20 uM Staurosporine vs. DMSO	REILSLMVK	-1.28073	1.65443	TRAF6	TNF receptor-associated factor 6	Q9Y4K3	125	10.5442	10.9168	9.62685	10.8148	8.79596	8.89795	10.0859	8.99994	NO	NO
20 uM Staurosporine vs. DMSO	SIAACHNVGLLAHDGQVNEDGQPDLGK	-0.896821	1.65428	COA7	Cytochrome c oxidase assembly factor 7	Q96BR5	107	13.7686	13.055	13.2837	12.7623	12.941	11.7385	12.3463	12.2565	NO	NO
20 uM Staurosporine vs. DMSO	NEALKSEEGCIPNIAPDICIAYK	-0.797916	1.65397	ORC3	Origin recognition complex subunit 3	Q9UBD5	612	14.1736	13.6915	13.0725	13.5984	12.9116	12.8555	12.3323	13.245	NO	NO
20 uM Staurosporine vs. DMSO	SMMACLLSSLK	0.329173	1.65327	OGA	Protein O-GlcNAcase	O60502	859	15.0984	15.1903	15.4091	14.8755	15.3669	15.5287	15.5128	15.4816	NO	NO
20 uM Staurosporine vs. DMSO	TLTEPSVDFNHSDDFTPISTVQK	-0.741313	1.65298	RICTOR	Rapamycin-insensitive companion of mTOR	Q6R327	1133	14.3385	14.2784	13.791	13.7066	12.705	13.1495	13.669	13.6258	NO	NO
20 uM Staurosporine vs. DMSO	KDPYPEEMMR	0.566298	1.65269	TJP1	Tight junction protein ZO-1	Q07157	1005	13.4007	14.31	13.8593	13.7481	14.6371	14.3465	14.4059	14.1939	NO	NO
20 uM Staurosporine vs. DMSO	RSTVAQLVK	0.656358	1.65246	ATP5F1A	ATP synthase subunit alpha, mitochondrial	P25705	253	12.943	13.2281	13.7839	12.8114	13.7792	14.0454	13.6118	13.9554	NO	NO
20 uM Staurosporine vs. DMSO	SGGGIVEPIPLNIK	0.123452	1.65244	GPATCH11	G patch domain-containing protein 11	Q8N954	117	17.5752	17.6526	17.639	17.5999	17.7165	17.7606	17.7001	17.7832	NO	NO
20 uM Staurosporine vs. DMSO	DIDAFWLQR	0.277897	1.65232	SNRNP200	U5 small nuclear ribonucleoprotein 200 kDa helicase	O75643	262	14.9957	15.0516	14.9248	15.0245	15.4072	15.3743	15.0393	15.2874	NO	NO
20 uM Staurosporine vs. DMSO	LLAEPVPGIKAEPDESNAR	-0.235457	1.65228	UBE2N	Ubiquitin-conjugating enzyme E2 N	P61088	15	20.0157	19.8596	19.6441	20.0001	19.6106	19.7091	19.6557	19.6024	NO	NO
20 uM Staurosporine vs. DMSO	VRGPDAAPFLLGLLTNELPLPSPAAAGAPPAAR	-1.10985	1.65215	IBA57	Putative transferase CAF17, mitochondrial	Q5T440	61	10.1474	9.88172	10.4476	10.0948	9.44369	9.59898	8.77562	8.31386	NO	NO
20 uM Staurosporine vs. DMSO	AVTIHDTEK	-1.31076	1.65167	UBA6	Ubiquitin-like modifier-activating enzyme 6	A0AVT1	87	10.234	11.2402	9.49876	10.2673	8.92406	8.56551	9.70044	8.80727	NO	NO
20 uM Staurosporine vs. DMSO	GLRDQEAEQEAQTIHEENIAR	-0.758299	1.65157	RPAP1	RNA polymerase II-associated protein 1	Q9BWH6	214	13.4378	13.6737	13.6033	13.6139	12.1167	12.8543	13.4328	12.8916	NO	NO
20 uM Staurosporine vs. DMSO	ILTTIEDLDQKKNQALNIAWQK	-0.543667	1.65155	SMC2	Structural maintenance of chromosomes protein 2	O95347	1015	13.1363	12.9885	12.8705	12.9229	12.5711	12.4295	12.1076	12.6353	NO	NO
20 uM Staurosporine vs. DMSO	DGPPLLENAHSS	0.697448	1.65089	SOS1	Son of sevenless homolog 1	Q07889	1322	12.7998	12.3049	13.0974	13.0871	13.4211	13.9009	13.1454	13.6114	NO	NO
20 uM Staurosporine vs. DMSO	GALLPPPYR	0.63649	1.65065	OTUD7B	OTU domain-containing protein 7B	Q6GQQ9	762	13.7229	13.1932	14.2197	14.0416	14.6111	14.5346	14.2259	14.3519	NO	NO
20 uM Staurosporine vs. DMSO	DQFFTTSSCAGR	-0.841958	1.65018	TYW3	tRNA wybutosine-synthesizing protein 3 homolog	Q6IPR3	41	12.4745	12.2331	11.8525	12.2597	11.5388	11.1768	10.8668	11.8694	NO	NO
20 uM Staurosporine vs. DMSO	KAPGFER	-1.05934	1.64974	UNK	RING finger protein unkempt homolog	Q9C0B0	414	10.6784	10.5764	10.6498	10.4744	9.13641	9.2384	10.4264	9.34039	NO	NO
20 uM Staurosporine vs. DMSO	AALTRDPQFQK	0.806381	1.6497	GPI	Glucose-6-phosphate isomerase	P06744	2	12.9367	13.9626	14.2512	13.2436	14.2312	14.3902	14.3855	14.6127	NO	NO
20 uM Staurosporine vs. DMSO	SPLEIEGAAGGLLR	1.3983	1.64957	MYO18B	Unconventional myosin-XVIIIb	Q8IUG5	2309	8.89752	9.25534	10.2895	9.10149	10.5636	10.1877	10.5057	11.88	NO	NO
20 uM Staurosporine vs. DMSO	SLIPDIKPLAGQEAVVDLHADDSR	-0.608228	1.64948	ACIN1	Apoptotic chromatin condensation inducer in the nucleus	Q9UKV3	873	14.4707	13.8818	13.6535	14.3663	13.2145	13.4208	13.6574	13.6466	NO	NO
20 uM Staurosporine vs. DMSO	NINLPEIPR	0.327059	1.64945	AP3S2	AP-3 complex subunit sigma-2	P59780	167	15.4431	15.5564	15.2908	15.6697	15.7932	15.5843	15.9961	15.8946	NO	NO
20 uM Staurosporine vs. DMSO	VFGNEIKLEKPKGK	-0.718148	1.64928	NCL	Nucleolin	P19338	371	12.8761	12.8952	12.1833	12.6904	11.8443	11.961	12.2982	11.669	NO	NO
20 uM Staurosporine vs. DMSO	QFRDYCAICLR	0.196796	1.64911	FHIP2A	FHF complex subunit HOOK interacting protein 2A	Q5W0V3	601	16.7366	16.5397	16.7636	16.6031	16.8395	16.8363	16.9602	16.7942	NO	NO
20 uM Staurosporine vs. DMSO	LNPVTTDEDLEIIFSR	-0.751307	1.64898	PPIL4	Peptidyl-prolyl cis-trans isomerase-like 4	Q8WUA2	247	15.73	15.2752	15.512	15.8453	15.4019	14.1018	15.069	14.7844	NO	NO
20 uM Staurosporine vs. DMSO	WTDGLLYLGTIK	2.03482	1.64776	PHF1	PHD finger protein 1	O43189	41	9.78358	12.5945	8.90157	9.98756	12.1428	12.6612	12.3955	12.207	NO	NO
20 uM Staurosporine vs. DMSO	HEDPSIISMEDGSPYVNGSLGEVTPCQHAK	1.22814	1.64773	NOL8	Nucleolar protein 8	Q76FK4	605	9.78219	9.52297	8.86038	8.3778	10.6913	10.5894	9.68784	10.4874	NO	NO
20 uM Staurosporine vs. DMSO	DKPSVEPVEEYDYEDLKESSNSVSNHQLSGFDQAR	-1.70451	1.6476	HBS1L	HBS1-like protein	Q9Y450	46	13.6696	12.4293	11.7685	12.8187	11.6147	11.9595	10.7409	9.55298	NO	NO
20 uM Staurosporine vs. DMSO	LGPSDYFGEIALLLNRPR	0.730588	1.64744	PRKAR1B	cAMP-dependent protein kinase type I-beta regulatory subunit	P31321	318	11.1458	11.7507	11.7635	12.0035	12.5476	12.2367	12.5476	12.2539	NO	NO
20 uM Staurosporine vs. DMSO	ISNPTEFQNHEK	2.98872	1.64665	NUSAP1	Nucleolar and spindle-associated protein 1	Q9BXS6	110	9.24681	9.98989	14.2732	9.45079	14.4372	13.7652	13.7467	12.9665	NO	NO
20 uM Staurosporine vs. DMSO	AAPRPAPVAQPPAAAPPSAVGSSAAAPR	-0.433297	1.64624	CHCHD2P9	Putative coiled-coil-helix-coiled-coil-helix domain-containing protein CHCHD2P9, mitochondrial;Coiled-coil-helix-coiled-coil-helix domain-containing protein 2	Q5T1J5	24	19.686	19.1958	18.9297	19.5062	18.8859	18.7465	18.9906	18.9614	NO	NO
20 uM Staurosporine vs. DMSO	WINATDPSAR	0.14605	1.64606	ASNS	Asparagine synthetase [glutamine-hydrolyzing]	P08243	541	19.1665	19.1497	19.2783	19.2324	19.4571	19.3369	19.303	19.3141	NO	NO
20 uM Staurosporine vs. DMSO	CESEADWHGLCGPQR	-1.76461	1.64592	RECQL5	ATP-dependent DNA helicase Q5	O94762	977	13.6886	15.5346	12.7808	12.5184	12.2916	11.938	11.9228	11.3115	NO	NO
20 uM Staurosporine vs. DMSO	FASGGCDNLIK	-2.02634	1.64502	SEC13	Protein SEC13 homolog	P55735	182	12.783	12.4155	10.677	13.4145	10.3347	10.1218	9.03582	11.6923	NO	NO
20 uM Staurosporine vs. DMSO	DAAAALAAMNGR	0.174115	1.64378	TIAL1	Nucleolysin TIAR	Q01085	60	17.1462	17.2425	17.0993	17.3264	17.3772	17.4444	17.3473	17.342	NO	NO
20 uM Staurosporine vs. DMSO	HELQANCYEEVKDRCTLAEK	-0.261327	1.64302	CFL1	Cofilin-1	P23528	133	17.321	16.9628	16.9541	17.1149	16.7906	16.7917	16.9631	16.7621	NO	NO
20 uM Staurosporine vs. DMSO	IKVPSFSETLSALNVVQVAGGSK	-2.00293	1.64279	HERC2	E3 ubiquitin-protein ligase HERC2	O95714	2980	11.3759	11.5654	10.9446	9.67279	9.10765	10.3985	7.27719	8.76364	NO	NO
20 uM Staurosporine vs. DMSO	EFSAQCIPALLGWTK	1.75021	1.64268	LTN1	E3 ubiquitin-protein ligase listerin	O94822	1141	13.1444	9.98991	11.9747	12.0173	12.9611	13.7865	13.257	14.1227	NO	NO
20 uM Staurosporine vs. DMSO	GWFPFSYTR	0.37963	1.64253	BAIAP2	Brain-specific angiogenesis inhibitor 1-associated protein 2	Q9UQB8	425	16.2646	16.2145	16.5804	15.9692	16.5782	16.8149	16.4453	16.7088	NO	NO
20 uM Staurosporine vs. DMSO	ANDAIASACLYIACRQEGVPR	-2.3069	1.64252	GTF2B	Transcription initiation factor IIB	Q00403	155	12.0889	13.0998	12.8016	13.3643	10.9095	9.11143	12.8927	9.21342	NO	NO
20 uM Staurosporine vs. DMSO	VILLDVAR	-1.46393	1.64249	RAB3GAP2	Rab3 GTPase-activating protein non-catalytic subunit	Q9H2M9	408	12.7262	12.2618	12.6463	12.2997	12.0547	9.58689	10.7749	11.6618	NO	NO
20 uM Staurosporine vs. DMSO	FQIEANFPR	0.470546	1.64164	FAF2	FAS-associated factor 2	Q96CS3	401	12.7129	12.4929	12.7592	12.848	13.0704	13.3621	13.1163	13.1464	NO	NO
20 uM Staurosporine vs. DMSO	DGPGNPLR	-0.192196	1.64142	USP7	Ubiquitin carboxyl-terminal hydrolase 7	Q93009	847	16.9812	16.7911	16.8792	17.0052	16.6828	16.6392	16.8162	16.7498	NO	NO
20 uM Staurosporine vs. DMSO	HMDGGQIDGQEITATAVLAPWPRPPPR	-0.39576	1.6413	RNPS1	RNA-binding protein with serine-rich domain 1	Q15287	222	14.8638	14.5348	14.485	14.3439	14.2492	13.9408	14.2598	14.1946	NO	NO
20 uM Staurosporine vs. DMSO	VAGYAALLEQYQK	2.40018	1.641	NAPA	Alpha-soluble NSF attachment protein	P54920	168	9.11766	8.56972	5.21818	8.72249	10.6339	10.1727	10.8196	9.60263	NO	NO
20 uM Staurosporine vs. DMSO	MHPLPGTQLLDVAGGTGDIAFR	-0.397328	1.64088	COQ5	2-methoxy-6-polyprenyl-1,4-benzoquinol methylase, mitochondrial	Q5HYK3	102	13.8648	13.8285	13.6261	13.4774	13.3184	13.2606	13.2637	13.3648	NO	NO
20 uM Staurosporine vs. DMSO	FAELVYTGFWHSPECEFVR	-1.03019	1.6407	ASS1	Argininosuccinate synthase	P00966	317	13.8614	12.6713	12.4383	12.6629	11.6293	12.3886	11.5037	11.9916	NO	NO
20 uM Staurosporine vs. DMSO	SLMDQYFAR	0.178381	1.64041	EIF4G2	Eukaryotic translation initiation factor 4 gamma 2	P78344	272	16.7747	16.6995	16.7453	16.53	16.8641	16.8658	16.8767	16.8564	NO	NO
20 uM Staurosporine vs. DMSO	STLAYGMLR	0.245644	1.64026	THUMPD3	tRNA (guanine(6)-N2)-methyltransferase THUMP3	Q9BV44	305	15.997	16.2021	16.319	16.0629	16.3582	16.2898	16.5149	16.4007	NO	NO
20 uM Staurosporine vs. DMSO	NLMALAR	-0.563109	1.64023	VAT1	Synaptic vesicle membrane protein VAT-1 homolog	Q99536	297	15.5175	15.7931	15.7935	16.2227	14.9462	15.6911	15.0334	15.4037	NO	NO
20 uM Staurosporine vs. DMSO	AELMEQVPHIALFCQENRPSIPYAFSK	-0.480951	1.63997	PPP4R1	Serine/threonine-protein phosphatase 4 regulatory subunit 1	Q8TF05	104	13.5109	13.3734	13.1743	13.3292	12.6198	12.936	13.0987	12.8095	NO	NO
20 uM Staurosporine vs. DMSO	VPLGPGLHAYPDELIR	-0.30887	1.63976	CUL7	Cullin-7	Q14999	12	14.9135	15.0701	14.9536	14.8069	14.7452	14.6769	14.3873	14.6991	NO	NO
20 uM Staurosporine vs. DMSO	TFLQDLAR	0.397844	1.63928	EI24	Etoposide-induced protein 2.4 homolog	O14681	7	13.7213	13.7325	13.684	13.4504	13.8067	14.0867	14.0202	14.266	NO	NO
20 uM Staurosporine vs. DMSO	AKSHLEVPLEENVNR	0.87163	1.63911	CCDC124	Coiled-coil domain-containing protein 124	Q96CT7	120	10.9953	10.83	11.6335	10.8148	11.5527	11.7701	12.1263	12.3111	NO	NO
20 uM Staurosporine vs. DMSO	RGSFEVTLLRPDGSSAELWTGIK	-0.473493	1.63855	SELENOH	Selenoprotein H	Q8IZQ5	76	14.0981	14.3223	14.3891	14.326	13.4822	13.7551	14.2155	13.7888	NO	NO
20 uM Staurosporine vs. DMSO	CRPYLVNLLPCLTR	2.08673	1.63845	HTT	Huntingtin	P42858	202	8.80329	10.2244	7.6224	8.46817	9.48833	12.3619	10.4954	11.1195	NO	NO
20 uM Staurosporine vs. DMSO	QVLDYPSPDVECAK	-1.90547	1.63785	SLAIN2	SLAIN motif-containing protein 2	Q9P270	154	13.0591	11.9203	10.8239	11.6735	9.1309	10.5873	8.84849	11.2882	NO	NO
20 uM Staurosporine vs. DMSO	TSLDIEEYSDTEVQKNQVLTLEEWQDKWVNGK	-1.08908	1.63772	TPMT	Thiopurine S-methyltransferase	P51580	6	14.1774	13.3006	13.2789	13.3625	12.6827	11.7485	13.3569	11.9751	NO	NO
20 uM Staurosporine vs. DMSO	AIVQQWLEYR	0.201193	1.63766	EEF1E1	Eukaryotic translation elongation factor 1 epsilon-1	O43324	69	17.8858	17.9785	18.1778	18.0385	18.3094	18.2475	18.1205	18.208	NO	NO
20 uM Staurosporine vs. DMSO	RLFFEGATVVILNMPK	-1.46301	1.63552	AAR2	Protein AAR2 homolog	Q9Y312	13	9.26139	10.4832	10.1466	10.1136	8.86681	7.23114	8.88001	9.17473	NO	NO
20 uM Staurosporine vs. DMSO	NSSVAAAQLVR	0.347689	1.63488	TUT4	Terminal uridylyltransferase 4	Q5TAX3	1382	14.0497	14.0839	14.1891	14.3293	14.7153	14.3894	14.3466	14.5914	NO	NO
20 uM Staurosporine vs. DMSO	YLAEFATGNDRK	0.300145	1.63448	YWHAE	14-3-3 protein epsilon	P62258	131	16.1038	15.851	15.6533	15.6826	16.1099	16.1865	16.1787	16.016	NO	NO
20 uM Staurosporine vs. DMSO	NPDDITQEEYGEFYK	0.14107	1.63427	HSP90AB1	Heat shock protein HSP 90-beta	P08238	292	18.9732	19.1546	19.0189	18.983	19.194	19.193	19.1385	19.1683	NO	NO
20 uM Staurosporine vs. DMSO	HTHVQDGEAGGITQQIGATNVPLEAINEQTK	-0.49813	1.63352	EIF5B	Eukaryotic translation initiation factor 5B	O60841	653	16.9167	16.3703	16.1137	16.6868	16.0519	15.7416	16.1666	16.1348	NO	NO
20 uM Staurosporine vs. DMSO	VSPETVDSVIMGNVLQSSSDAIYLAR	-1.61528	1.63326	ACAA2	3-ketoacyl-CoA thiolase, mitochondrial	P42765	46	12.2608	12.3447	11.7422	12.7583	11.8742	11.2965	9.19414	10.2801	NO	NO
20 uM Staurosporine vs. DMSO	SLPEEDVAEIQHAEEFLIKPESK	-0.425739	1.63306	DKC1	H/ACA ribonucleoprotein complex subunit DKC1	O60832	21	15.3563	14.9124	14.7854	15.1642	14.3861	14.6455	14.8418	14.642	NO	NO
20 uM Staurosporine vs. DMSO	LFEEFRDSDDVLGHIMK	1.11599	1.63254	TIMELESS	Protein timeless homolog	Q9UNS1	900	9.15004	9.3197	8.38205	9.52457	10.0592	9.65996	10.633	10.4882	NO	NO
20 uM Staurosporine vs. DMSO	LSSAETYSR	1.25717	1.63248	NBEAL2	Neurobeachin-like protein 2	Q6ZNJ1	1829	10.7127	12.3747	10.9304	12.455	13.1647	12.8576	12.5118	12.9672	NO	NO
20 uM Staurosporine vs. DMSO	EVLAELEALER	-1.30245	1.63238	PCK2	Phosphoenolpyruvate carboxykinase [GTP], mitochondrial	Q16822	625	10.509	9.8454	9.78646	10.9744	8.40045	8.73834	9.92632	8.84033	NO	NO
20 uM Staurosporine vs. DMSO	MLVIEQCK	0.207641	1.63219	CCT5	T-complex protein 1 subunit epsilon	P48643	371	17.2943	17.2834	17.2283	17.0247	17.3515	17.5172	17.3569	17.4356	NO	NO
20 uM Staurosporine vs. DMSO	SSWHQSSFHSTR	1.52266	1.63198	PKP2	Plakophilin-2	Q99959	288	9.36953	10.7369	8.13394	9.17518	10.8178	10.6652	10.722	11.3012	NO	NO
20 uM Staurosporine vs. DMSO	AAFTVSLDPGPLEQFPHSMEPQLR	-0.281451	1.63073	MRTO4	mRNA turnover protein 4 homolog	Q9UKD2	131	17.0133	16.8808	17.1231	16.9203	16.7277	16.4879	16.9356	16.6604	NO	NO
20 uM Staurosporine vs. DMSO	NAAFGQSGGAGSDSNSPGNVQPNSAPSVESHPVLEK	-2.12463	1.63054	YTHDF1	YTH domain-containing family protein 1	Q9BYJ9	335	12.2448	12.44	11.4089	11.6154	11.4176	9.84338	10.3588	7.59085	NO	NO
20 uM Staurosporine vs. DMSO	DVPSPLHAGSK	-1.70952	1.63008	MARF1	Meiosis regulator and mRNA stability factor 1	Q9Y4F3	63	11.5155	11.4908	11.8257	11.8593	8.88184	11.7138	10.1718	9.08582	NO	NO
20 uM Staurosporine vs. DMSO	THSVNGITEEADPTIYSGK	-0.167417	1.63001	CSDE1	Cold shock domain-containing protein E1	O75534	582	16.3705	16.3719	16.2308	16.3663	16.1321	16.2342	16.1295	16.174	NO	NO
20 uM Staurosporine vs. DMSO	FIDEETKDTK	1.95786	1.6294	SKA1	Spindle and kinetochore-associated protein 1	Q96BD8	197	9.30357	11.5904	10.6955	9.50755	10.6684	12.1574	13.0095	13.0933	NO	NO
20 uM Staurosporine vs. DMSO	DKLPPVPSSR	1.98121	1.62935	CBL	E3 ubiquitin-protein ligase CBL	P22681	576	14.1169	10.9145	12.6983	10.8125	14.1784	13.8416	14.6853	13.7617	NO	NO
20 uM Staurosporine vs. DMSO	EAEYAEAR	1.98804	1.62864	SZRD1	SUZ domain-containing protein 1	Q7Z422	92	13.431	12.2831	9.72402	11.3251	13.4631	13.8919	13.185	14.1754	NO	NO
20 uM Staurosporine vs. DMSO	TAQGSLSLK	1.95638	1.62829	EIF3H	Eukaryotic translation initiation factor 3 subunit H	O15372	157	12.73	10.827	12.5332	9.36651	13.554	13.1564	13.2426	13.3292	NO	NO
20 uM Staurosporine vs. DMSO	KKPLKQPK	2.486	1.6279	TMA7	Translation machinery-associated protein 7	Q9Y2S6	9	8.81508	8.71309	9.69709	10.8851	9.72423	13.7633	11.7442	12.8227	NO	NO
20 uM Staurosporine vs. DMSO	SDAPTGDVLLDEALK	-0.267572	1.62599	GOLPH3	Golgi phosphoprotein 3	Q9H4A6	124	15.0773	15.1154	14.9226	14.9862	14.8949	14.7529	14.7978	14.5857	NO	NO
20 uM Staurosporine vs. DMSO	RLSCCLYKPR	0.986296	1.62546	MORC2	ATPase MORC2	Q9Y6X9	266	9.70933	9.88707	10.6257	9.7015	10.8982	10.7962	11.4802	10.6942	NO	NO
20 uM Staurosporine vs. DMSO	KLELSDNIISGGLEVLAEKCPNLTYLNLSGNK	-0.52721	1.6249	ANP32E	Acidic leucine-rich nuclear phosphoprotein 32 family member E	Q9BTT0	68	15.6609	14.9605	14.8791	15.3952	14.7475	14.7424	14.8696	14.4274	NO	NO
20 uM Staurosporine vs. DMSO	GPGASGEQPEPGEAAAGGAAEEAR	-0.884594	1.62387	ACBD3	Golgi resident protein GCP60	Q9H3P7	50	13.6548	12.9994	13.7024	13.4263	12.8933	11.8854	12.2838	13.1821	NO	NO
20 uM Staurosporine vs. DMSO	KNQDEESQEAPELLKRPK	-0.698141	1.62296	ABCF1	ATP-binding cassette sub-family F member 1	Q8NE71	589	12.643	12.3673	11.9313	12.1924	11.3625	11.8493	11.5345	11.5951	NO	NO
20 uM Staurosporine vs. DMSO	EFVMQVK	0.161897	1.62265	STAU2	Double-stranded RNA-binding protein Staufen homolog 2	Q9NUL3	339	16.6394	16.5971	16.7283	16.6875	16.7319	16.8407	16.9047	16.8227	NO	NO
20 uM Staurosporine vs. DMSO	NDSVLDMAR	0.246126	1.6226	BIRC6	Baculoviral IAP repeat-containing protein 6	Q9NR09	4379	15.9033	15.8196	16.0352	15.7309	16.0794	15.9799	16.199	16.2153	NO	NO
20 uM Staurosporine vs. DMSO	QLPSAGPDKNLVTGDHIPTPQDLPQRK	-0.56418	1.62255	ENSA	Alpha-endosulfine	O43768	81	17.1679	16.6527	16.4409	16.6849	16.1941	16.3164	16.4936	15.6856	NO	NO
20 uM Staurosporine vs. DMSO	MLVAAAAER	0.31593	1.62254	METTL26	Methyltransferase-like 26	Q96S19	1	17.2865	17.3643	17.4338	16.9278	17.7273	17.5566	17.5053	17.4868	NO	NO
20 uM Staurosporine vs. DMSO	QQQQNVEDAMK	1.49194	1.62214	BUD13	BUD13 homolog	Q9BRD0	506	9.28042	10.8005	11.1233	9.07644	12.1113	11.2245	11.5923	11.3203	NO	NO
20 uM Staurosporine vs. DMSO	RGDESQFLLQAPGSTELEELTVQVAR	-0.501939	1.62141	CFAP298	Cilia- and flagella-associated protein 298	P57076	8	14.8492	14.9554	14.7152	15.1613	13.9354	14.443	14.6671	14.6278	NO	NO
20 uM Staurosporine vs. DMSO	LQEELSAATDRICSLQEEQQQLR	-0.376379	1.62116	RUFY1	RUN and FYVE domain-containing protein 1	Q96T51	339	15.3712	15.0196	14.9685	15.3656	14.6698	14.6966	15.0438	14.8091	NO	NO
20 uM Staurosporine vs. DMSO	IINGIVQK	1.54971	1.61948	PCF11	Pre-mRNA cleavage complex 2 protein Pcf11	O94913	449	10.7338	12.5556	9.85177	11.8903	12.5234	12.8017	12.7726	13.1327	NO	NO
20 uM Staurosporine vs. DMSO	HSNVVILTTSNITEKIDVAFVDRADIK	-1.18	1.61944	TRIP13	Pachytene checkpoint protein 2 homolog	Q15645	290	13.1155	12.2447	12.0057	12.5034	11.7918	10.5277	12.0329	10.7968	NO	NO
20 uM Staurosporine vs. DMSO	LSQAYAISAGVSLEGQQLFQTIHK	-0.304859	1.61935	LSM12	Protein LSM12	Q3MHD2	99	14.9297	14.9076	14.6858	14.9985	14.7303	14.4166	14.6338	14.5214	NO	NO
20 uM Staurosporine vs. DMSO	EDWAPKPHAFVGSVK	1.165	1.61787	ASXL1	Polycomb group protein ASXL1	Q8IXJ9	1354	9.16812	9.06613	10.0501	8.96415	10.6466	10.7486	9.66264	10.8506	NO	NO
20 uM Staurosporine vs. DMSO	IPQNPSPHTHQQQNAPVTVIQSK	-0.592447	1.61744	ARID2	AT-rich interactive domain-containing protein 2	Q68CP9	684	13.4361	13.2269	13.3791	13.4081	12.9155	12.2499	13.1179	12.7972	NO	NO
20 uM Staurosporine vs. DMSO	TSDPTQDLHFTPLLSPSSSTSASSTAK	-0.80437	1.61655	TANC1	Protein TANC1	Q9C0D5	451	14.5995	13.8506	13.9631	13.6041	12.8391	12.8417	13.8095	13.3095	NO	NO
20 uM Staurosporine vs. DMSO	SVQAHEVHQK	1.24135	1.61648	CENPC	Centromere protein C	Q03188	110	9.72629	9.35348	10.3375	8.66794	10.3593	10.7067	11.4213	10.5633	NO	NO
20 uM Staurosporine vs. DMSO	NASSRPASAISGQNNNHSGNKPDPPPVLR	-1.52458	1.6151	MAP7	Ensconsin	Q14244	34	14.0769	14.2859	13.406	13.6628	12.6173	12.647	10.6453	13.4238	NO	NO
20 uM Staurosporine vs. DMSO	LLADPTGAFGKETDLLLDDSLVSIFGNRR	-0.597998	1.61472	PRDX5	Peroxiredoxin-5, mitochondrial	P30044	149	16.072	15.5403	15.3747	15.98	15.2559	14.7288	15.5605	15.0297	NO	NO
20 uM Staurosporine vs. DMSO	SLPSASTSK	0.546457	1.61448	CHMP2B	Charged multivesicular body protein 2b	Q9UQN3	187	14.5456	13.9952	13.81	13.9433	14.3873	14.4365	14.6929	14.9632	NO	NO
20 uM Staurosporine vs. DMSO	VSLLGPVTTPEHQLLK	-0.380101	1.61429	RACGAP1	Rac GTPase-activating protein 1	Q9H0H5	572	14.5556	14.22	14.2589	14.5686	14.2562	13.9845	13.905	13.9369	NO	NO
20 uM Staurosporine vs. DMSO	TSYGKDLIK	0.730253	1.61428	ANXA7	Annexin A7	P20073	229	11.4974	11.3594	11.5571	11.0171	11.7613	12.4249	12.2087	11.9572	NO	NO
20 uM Staurosporine vs. DMSO	NLKVPSGQNADVQKTDN	-0.654023	1.61386	NAA50	N-alpha-acetyltransferase 50	Q9GZZ1	153	13.8699	13.687	13.1922	14.2695	12.8778	13.2274	13.0651	13.2322	NO	NO
20 uM Staurosporine vs. DMSO	EMVLELIR	0.125272	1.61363	FUBP1	Far upstream element-binding protein 1	Q96AE4	249	20.1198	20.0874	20.1764	20.191	20.2777	20.3364	20.2151	20.2464	NO	NO
20 uM Staurosporine vs. DMSO	ALQEFDLALR	0.144303	1.61312	DDX27	Probable ATP-dependent RNA helicase DDX27	Q96GQ7	667	17.928	17.8524	18.0024	18.0229	18.1196	18.0344	18.1051	18.1239	NO	NO
20 uM Staurosporine vs. DMSO	LFLDGEEEKEWAFEESKIDEHHFVAVALR	-1.8651	1.61237	AASDHPPT	L-aminoadipate-semialdehyde dehydrogenase-phosphopantetheinyl transferase	Q9NRN7	218	13.2032	12.4455	11.7901	12.5202	11.933	9.23765	11.6847	9.64328	NO	NO
20 uM Staurosporine vs. DMSO	AAYQVAALPK	0.483821	1.61236	RIDA	2-iminobutanoate/2-iminopropanoate deaminase	P52758	108	12.4941	12.9191	12.9637	12.832	13.1547	13.4032	13.1937	13.3926	NO	NO
20 uM Staurosporine vs. DMSO	EGLISQDGSSLEALLR	-0.251575	1.61235	DPF2	Zinc finger protein ubi-d4	Q92785	109	16.3858	16.2668	16.2265	16.3498	15.8622	15.9806	16.2246	16.1553	NO	NO
20 uM Staurosporine vs. DMSO	YVASYLLAALGGNSSPSAK	0.238421	1.61226	RPLP2	Large ribosomal subunit protein P2	P05387	3	18.9146	19.1623	19.1549	19.3231	19.306	19.4636	19.3136	19.4255	NO	NO
20 uM Staurosporine vs. DMSO	LYWSTVDAR	1.47292	1.6114	KMT2B	Histone-lysine N-methyltransferase 2B	Q9UMN6	1763	9.69022	11.691	10.152	10.8862	12.9695	11.5736	11.4327	12.3353	NO	NO
20 uM Staurosporine vs. DMSO	MSTEEIIQR	0.201912	1.61127	PSMC3	26S proteasome regulatory subunit 6A	P17980	36	15.8714	16.0357	15.8221	15.9816	16.0776	16.2267	16.0608	16.1534	NO	NO
20 uM Staurosporine vs. DMSO	DFMFQPLDGLK	0.218723	1.61126	DLGAP5	Disks large-associated protein 5	Q15398	311	16.516	16.7135	16.7262	16.5926	16.7044	16.9913	16.8462	16.8814	NO	NO
20 uM Staurosporine vs. DMSO	ELVVNCCTEFIHLISSEANEICNK	-0.487046	1.61104	DR1	Protein Dr1	Q01658	37	14.0585	13.5392	13.894	13.5786	13.4395	13.4224	13.2109	13.0493	NO	NO
20 uM Staurosporine vs. DMSO	SFYPEEVSSMVLTK	0.205945	1.61093	HSPA8	Heat shock cognate 71 kDa protein	P11142	113	15.8018	15.6845	15.6449	15.5201	15.8903	15.8259	15.9028	15.856	NO	NO
20 uM Staurosporine vs. DMSO	EIAEAYDVLSDPR	1.74438	1.61062	DNAJB1	DnaJ homolog subfamily B member 1	P25685	47	10.6687	10.5667	9.27675	10.4647	13.0843	12.6676	10.3453	11.8572	NO	NO
20 uM Staurosporine vs. DMSO	VAISAIYMDLEAFLQR	1.40279	1.60997	PRUNE1	Exopolyphosphatase PRUNE1	Q86TP1	248	8.09556	8.75419	8.40922	8.36877	8.90115	9.79824	11.1124	9.42707	NO	NO
20 uM Staurosporine vs. DMSO	SVYIDAR	-3.15918	1.60968	ZC3H15	Zinc finger CCCH domain-containing protein 15	Q8WU90	135	15.6246	15.4738	10.1051	13.1218	10.5917	10.6936	9.60766	10.7956	NO	NO
20 uM Staurosporine vs. DMSO	RPSRPSNSNISKGESRPK	-1.63734	1.60958	DHX57	Putative ATP-dependent RNA helicase DHX57	Q6P158	72	10.2053	11.3121	12.3898	10.0715	8.95834	9.06033	10.2483	9.16231	NO	NO
20 uM Staurosporine vs. DMSO	EGPGRPPLDGR	-0.861619	1.60925	SCAF8	SR-related and CTD-associated factor 8	Q9UPN6	1047	12.6709	13.3753	12.8307	13.0522	11.4991	12.6716	11.8531	12.459	NO	NO
20 uM Staurosporine vs. DMSO	SRMLSIFYFAIPVGSGLGYIAGSK	1.15934	1.60877	SPNS1	Protein spinster homolog 1	Q9H2V7	185	9.17095	9.06896	10.053	8.96698	10.6438	10.7458	9.65982	10.8478	NO	NO
20 uM Staurosporine vs. DMSO	AVSTANPLLR	0.21874	1.60873	PARD6B	Partitioning defective 6 homolog beta	Q9BYG5	81	15.9593	16.1225	16.1362	16.187	16.2233	16.4693	16.2547	16.3327	NO	NO
20 uM Staurosporine vs. DMSO	VIGTLEEVHMPQNGINHPGITALAQAFAVNPLLR	-0.313705	1.60865	RANGAP1	Ran GTPase-activating protein 1	P46060	206	14.612	14.3397	14.2735	14.4074	14.0853	14.1143	13.9811	14.1971	NO	NO
20 uM Staurosporine vs. DMSO	LYANMFER	0.14602	1.60829	FKBP4	Peptidyl-prolyl cis-trans isomerase FKBP4	Q02790	410	19.9425	20.0181	20.1217	19.9702	20.08	20.1669	20.2005	20.1891	NO	NO
20 uM Staurosporine vs. DMSO	VTDAPTYTTR	1.59819	1.60788	CDKN2AIP	CDKN2A-interacting protein	Q9NXV6	109	10.0725	10.1745	12.5895	10.8379	13.1624	12.3763	12.5645	11.9641	NO	NO
20 uM Staurosporine vs. DMSO	DDAYWPEAK	0.288857	1.60683	SAFB	Scaffold attachment factor B1	Q15424	720	15.1327	15.3032	15.2081	15.4247	15.4537	15.4744	15.7924	15.5036	NO	NO
20 uM Staurosporine vs. DMSO	SNYNFEKPFLWLAR	0.164881	1.60658	RAN	GTP-binding nuclear protein Ran	P62826	153	20.5671	20.6403	20.6902	20.5265	20.8767	20.79	20.663	20.754	NO	NO
20 uM Staurosporine vs. DMSO	TTPDQELVPASEPVWERPWSVEEIRR	-0.287069	1.60581	WASHC2C	WASH complex subunit 2C	Q9Y4E1	5	16.1248	15.6666	15.9288	15.9101	15.5621	15.6481	15.7386	15.5332	NO	NO
20 uM Staurosporine vs. DMSO	CELMALGLK	1.08466	1.60486	SDE2	Splicing regulator SDE2	Q6IQ49	406	11.3246	11.5754	10.8595	10.9631	12.9063	12.5671	12.3248	11.263	NO	NO
20 uM Staurosporine vs. DMSO	IVLFLQK	0.309258	1.60472	MYO1D	Unconventional myosin-Id	O94832	701	14.8941	14.8481	15.1254	15.1493	15.4478	15.3665	15.0964	15.3433	NO	NO
20 uM Staurosporine vs. DMSO	LLWANKPDKLQQAKDEILEWESR	-1.34696	1.60452	SNX1	Sorting nexin-1	Q13596	437	15.0923	14.6714	14.5934	14.2215	12.2214	12.9178	14.7485	13.3031	NO	NO
20 uM Staurosporine vs. DMSO	GNLKHEQASNVLSDISEFR	-1.32161	1.60444	THOC2	THO complex subunit 2	Q8NI27	59	11.38	11.5199	11.3126	11.4352	10.0625	10.5487	8.77252	10.9775	NO	NO
20 uM Staurosporine vs. DMSO	QEKPAEKPAETPVATSPTATDSTSGDSSR	-0.534749	1.60421	RAD23B	UV excision repair protein RAD23 homolog B	P54727	145	15.9939	15.2442	15.0531	15.3957	14.8201	14.805	15.098	14.8248	NO	NO
20 uM Staurosporine vs. DMSO	HYFQNTQGLIFVVDSNDRER	-0.213231	1.60404	ARF1	ADP-ribosylation factor 1	P84077	80	17.5618	17.4617	17.2873	17.5701	17.3618	17.2529	17.1533	17.26	NO	NO
20 uM Staurosporine vs. DMSO	ELEQYQK	1.3415	1.60391	HMG20A	High mobility group protein 20A	Q9NP66	166	15.5195	14.0377	12.7994	14.2179	15.3196	15.4699	15.3859	15.7651	NO	NO
20 uM Staurosporine vs. DMSO	VSFSSFESVSNVTSFFPK	3.42117	1.6037	USP35	Ubiquitin carboxyl-terminal hydrolase 35	Q9P2H5	898	5.41643	11.9393	9.473	7.2648	12.4286	11.9722	11.4457	11.9317	NO	NO
20 uM Staurosporine vs. DMSO	AAAAPAGGNPEQR	0.565138	1.60338	MSL1	Male-specific lethal 1 homolog	Q68DK7	10	12.6213	12.4957	12.0774	12.4092	12.9182	12.7216	13.201	13.0233	NO	NO
20 uM Staurosporine vs. DMSO	FESVSHLISYHMDNHLPIISAGSELCLQQPVER	-0.744621	1.60247	SHC1	SHC-transforming protein 1	P29353	549	13.328	12.6751	12.834	12.9445	12.0452	11.8828	12.8212	12.0537	NO	NO
20 uM Staurosporine vs. DMSO	KISNNITLR	-3.21299	1.60246	INTS4	Integrator complex subunit 4	Q96HW7	437	14.9614	14.5921	13.8484	9.30288	10.3622	10.2602	9.07222	10.1582	NO	NO
20 uM Staurosporine vs. DMSO	YHGVSLLNPPETLNL	-2.39159	1.60246	CCNA2	Cyclin-A2	P20248	418	12.5381	13.6573	13.1009	13.779	10.1502	11.9589	12.8363	8.56353	NO	NO
20 uM Staurosporine vs. DMSO	ALESSFAQNPLPLDEELDRLR	-0.722286	1.60226	ZHX3	Zinc fingers and homeoboxes protein 3	Q9H4I2	626	12.7633	12.5427	12.2916	13.229	12.2198	11.7103	11.9125	12.0949	NO	NO
20 uM Staurosporine vs. DMSO	CELIKESEVK	0.971584	1.602	PPP4C	Serine/threonine-protein phosphatase 4 catalytic subunit	P60510	17	10.8836	11.5255	11.3288	11.9995	12.634	12.8938	12.377	11.719	NO	NO
20 uM Staurosporine vs. DMSO	VELPTCMYR	0.157625	1.60179	AIMP2	Aminoacyl tRNA synthase complex-interacting multifunctional protein 2	Q13155	18	16.4148	16.5058	16.58	16.5043	16.7142	16.6229	16.6884	16.6099	NO	NO
20 uM Staurosporine vs. DMSO	QGSSLNLFEDVQITEPEAEPESK	-0.351843	1.60049	RAB11FIP1	Rab11 family-interacting protein 1	Q6WKZ4	498	14.8811	14.6811	14.4049	14.7431	14.2272	14.2543	14.5039	14.3175	NO	NO
20 uM Staurosporine vs. DMSO	GSSFTFLTPGPNWDFTLKR	-0.743359	1.60007	NET1	Neuroepithelial cell-transforming gene 1 protein	Q7Z628	49	12.0812	11.6021	11.7341	12.1249	11.049	11.5245	10.8975	11.0978	NO	NO
20 uM Staurosporine vs. DMSO	RVEDAYILTCNVSLEYEKTEVNSGFFYK	-0.692908	1.59992	CCT6A	T-complex protein 1 subunit zeta	P40227	224	16.4888	15.5969	16.1593	16.1583	14.8895	15.6818	15.8594	15.201	NO	NO
20 uM Staurosporine vs. DMSO	LINAEYACYK	0.740984	1.59951	RAP1GAP	Rap1 GTPase-activating protein 1	P47736	369	12.6134	12.9361	12.0474	11.8283	12.9919	13.0746	13.1187	13.2038	NO	NO
20 uM Staurosporine vs. DMSO	QEVRQEVEEWVASGNK	-1.87057	1.59948	MTHFD2	Bifunctional methylenetetrahydrofolate dehydrogenase/cyclohydrolase, mitochondrial	P13995	51	13.4253	10.8661	10.3512	10.968	9.85492	9.34351	8.87092	10.0589	NO	NO
20 uM Staurosporine vs. DMSO	AVIETADR	0.263476	1.59886	PPID	Peptidyl-prolyl cis-trans isomerase D	Q08752	258	19.0389	18.9848	19.1158	18.723	19.0742	19.1898	19.2989	19.3535	NO	NO
20 uM Staurosporine vs. DMSO	ELAEQLGLSTGEKEKLPGELEPVQATQNK	-0.519191	1.59832	EIF3G	Eukaryotic translation initiation factor 3 subunit G	O75821	181	18.1826	17.4435	17.3637	17.849	16.9107	17.1606	17.3941	17.2965	NO	NO
20 uM Staurosporine vs. DMSO	VDMMDLPR	0.362254	1.59804	RPA3	Replication protein A 14 kDa subunit	P35244	2	14.8791	15.2026	14.9504	14.6298	15.3357	15.4025	15.0977	15.2751	NO	NO
20 uM Staurosporine vs. DMSO	ANTNSLEVSWGAVATADSYLLQLQK	-1.71233	1.59795	HCFC1	Host cell factor 1	P51610	375	10.5004	9.64833	8.87022	9.49719	7.81616	9.37237	6.67523	7.80303	NO	NO
20 uM Staurosporine vs. DMSO	MSFGEIEEDAYQEDLGFSLGHLGK	-0.530816	1.59739	PRPF31	U4/U6 small nuclear ribonucleoprotein Prp31	Q8WWY3	378	15.3198	15.3273	15.3128	15.2482	14.1637	14.8125	15.1258	14.9829	NO	NO
20 uM Staurosporine vs. DMSO	KGIEESLR	-1.01739	1.59639	HADH	Hydroxyacyl-coenzyme A dehydrogenase, mitochondrial	Q16836	68	14.337	14.2875	13.9175	14.5961	13.8706	13.6125	13.4716	12.1138	NO	NO
20 uM Staurosporine vs. DMSO	LSHLKPSSEGLAIVTK	1.40614	1.59525	RO60	RNA-binding protein RO60	P10155	185	8.77419	9.96209	8.85033	8.00729	9.89472	10.8712	9.68326	10.7692	NO	NO
20 uM Staurosporine vs. DMSO	EAVTHIGR	0.340644	1.59525	EIF4E	Eukaryotic translation initiation factor 4E	P06730	174	17.5935	17.7972	17.2248	17.5247	17.7433	18.0567	17.928	17.7747	NO	NO
20 uM Staurosporine vs. DMSO	SKLTFSCLGGSDNFKHLNEIDLFHCIDPNDSK	-1.20463	1.59509	PTGES3	Prostaglandin E synthase 3	Q15185	34	14.4445	14.1295	14.22	13.0472	12.3548	12.5389	13.8935	12.2355	NO	NO
20 uM Staurosporine vs. DMSO	LFEMASR	0.299842	1.59458	RRP1	Ribosomal RNA processing protein 1 homolog A	P56182	307	17.274	17.4803	17.6173	17.1271	17.5352	17.7651	17.7385	17.6594	NO	NO
20 uM Staurosporine vs. DMSO	SEPPLPPGGQELLELLLR	1.52471	1.59365	GPSM3	G-protein-signaling modulator 3	Q9Y4H4	124	9.602	9.68162	8.21342	9.57963	12.0801	10.5908	10.0159	10.4888	NO	NO
20 uM Staurosporine vs. DMSO	GWAPVFLDR	3.17298	1.59292	NUBP2	Cytosolic Fe-S cluster assembly factor NUBP2	Q9Y5Y2	75	14.8047	10.0829	14.564	10.1849	14.6249	16.0629	15.7353	15.9052	NO	NO
20 uM Staurosporine vs. DMSO	LKLEQAVEWPLKHPESFIR	-0.437944	1.59287	AFG2A	ATPase family gene 2 protein homolog A	Q8NB90	637	14.6324	14.3788	14.146	14.2875	13.8116	13.777	14.269	13.8353	NO	NO
20 uM Staurosporine vs. DMSO	EGILDTAQTICDVASR	1.6855	1.59165	ATG2A	Autophagy-related protein 2 homolog A	Q2TAZ0	1860	10.2724	10.3224	11.4691	10.2204	13.6098	12.2753	10.6804	12.4607	NO	NO
20 uM Staurosporine vs. DMSO	HGHLCPIDTGLIEK	-1.11807	1.59165	DNMT1	DNA (cytosine-5)-methyltransferase 1	P26358	416	12.6549	12.7472	11.4731	12.6288	11.9088	11.2707	11.3317	10.5204	NO	NO
20 uM Staurosporine vs. DMSO	MPSGEFAR	0.133124	1.5914	PCNA	Proliferating cell nuclear antigen	P12004	139	17.8869	17.907	17.9152	17.7673	18.0301	17.9808	18.0274	17.9706	NO	NO
20 uM Staurosporine vs. DMSO	KVWGHELAQQGSSLAQNR	2.62164	1.59088	LRRCC1	Leucine-rich repeat and coiled-coil domain-containing protein 1	Q9C099	767	9.93084	14.1207	9.79214	9.72686	12.8684	13.6875	14.0086	13.4926	NO	NO
20 uM Staurosporine vs. DMSO	DLLTEESPSGR	-1.57461	1.59072	TTC3	E3 ubiquitin-protein ligase TTC3	P53804	2000	10.9408	10.8388	9.54881	12.062	8.874	8.97599	10.164	9.07798	NO	NO
20 uM Staurosporine vs. DMSO	LILPVGPAGGNQMLEQYDKLQDGSIK	-0.494561	1.5902	PCMT1	Protein-L-isoaspartate(D-aspartate) O-methyltransferase	P22061	179	14.2375	14.2289	13.742	14.5095	13.7077	13.8981	13.5489	13.585	NO	NO
20 uM Staurosporine vs. DMSO	FIEAAQR	0.489028	1.5899	COPS4	COP9 signalosome complex subunit 4	Q9BT78	201	15.583	15.1836	15.7531	15.019	15.6797	15.7689	15.8911	16.155	NO	NO
20 uM Staurosporine vs. DMSO	VTPQNLK	0.347425	1.58989	RPL7L1	Ribosomal protein uL30-like	Q6DKI1	132	15.1765	14.967	15.3803	15.3183	15.7864	15.603	15.3328	15.5095	NO	NO
20 uM Staurosporine vs. DMSO	QQSEEDLLLQDFSR	0.485978	1.58963	SSR3	Translocon-associated protein subunit gamma	Q9UNL2	9	14.3719	14.3993	13.8171	13.8784	14.4543	14.4512	14.6399	14.8653	NO	NO
20 uM Staurosporine vs. DMSO	LKVTELR	-1.24101	1.58939	HNRNPUL2	Heterogeneous nuclear ribonucleoprotein U-like protein 2	Q1KMD3	6	16.9522	17.1314	16.9714	17.6837	16.7321	16.5486	14.5185	15.9755	NO	NO
20 uM Staurosporine vs. DMSO	LETEIER	0.504096	1.58931	TTC7B	Tetratricopeptide repeat protein 7B	Q86TV6	10	13.9039	14.2845	13.5185	14.306	14.4941	14.6285	14.4312	14.4755	NO	NO
20 uM Staurosporine vs. DMSO	DLSQAPFSWPAGALVAQACHAATAALHTHR	-0.785125	1.58787	PTRHD1	Putative peptidyl-tRNA hydrolase PTRHD1	Q6GMV3	34	12.0429	12.0195	12.1312	11.577	11.4188	10.7888	11.5195	10.9031	NO	NO
20 uM Staurosporine vs. DMSO	LRFEDTLEFVGFDAK	-0.545514	1.58773	CUL4B	Cullin-4B	Q13620	119	13.6477	13.3111	13.7076	13.8068	13.3792	12.6699	13.1773	13.0647	NO	NO
20 uM Staurosporine vs. DMSO	CPYIIGTTNQPVK	1.47891	1.58746	NAV1	Neuron navigator 1	Q8NEY1	1651	7.56741	10.017	9.22756	9.3198	10.291	11.0004	10.4273	10.3286	NO	NO
20 uM Staurosporine vs. DMSO	SSIDYQYQLLR	-1.87997	1.58625	CNOT8	CCR4-NOT transcription complex subunit 8	Q9UFF9	56	12.3495	12.8151	13.0148	12.7667	11.4106	8.99126	12.5759	10.4485	NO	NO
20 uM Staurosporine vs. DMSO	IFSPNVVNLTLVDLPGMTKVPVGDQPK	-0.355857	1.5861	DNM1L	Dynamin-1-like protein	O00429	134	15.1854	14.8258	14.8157	14.8147	14.7695	14.3417	14.5672	14.5397	NO	NO
20 uM Staurosporine vs. DMSO	LGICVTQFDPK	0.171365	1.58546	EEFSEC	Selenocysteine-specific elongation factor	P57772	286	15.2526	15.2248	15.2816	15.2711	15.4509	15.4649	15.4	15.3996	NO	NO
20 uM Staurosporine vs. DMSO	AAAAAATAAAAASIR	0.270513	1.58523	SCFD1	Sec1 family domain-containing protein 1	Q8WVM8	2	19.1505	19.2632	18.988	19.3889	19.3854	19.6098	19.3199	19.5576	NO	NO
20 uM Staurosporine vs. DMSO	RSPSVSSPEPAEK	0.867	1.58513	SRRM2	Serine/arginine repetitive matrix protein 2	Q9UQ35	1726	12.05	12.6503	13.6338	12.5013	13.5824	13.4935	13.7312	13.4963	NO	NO
20 uM Staurosporine vs. DMSO	DIVPFSELGTTPSGGGFFQGISFPEISTRPPLGSTELQAAK	-1.29403	1.58456	TMPO	Lamina-associated polypeptide 2, isoform alpha	P42166	202	12.5808	11.919	11.7986	12.1641	11.0065	11.4364	11.3766	9.46688	NO	NO
20 uM Staurosporine vs. DMSO	RQDLYSAR	0.474574	1.58421	SART1	U4/U6.U5 tri-snRNP-associated protein 1	O43290	245	14.535	14.159	14.5064	13.8469	14.6214	14.6773	14.6692	14.9778	NO	NO
20 uM Staurosporine vs. DMSO	STFSTNYR	0.137731	1.58359	KRT18	Keratin, type I cytoskeletal 18	P05783	7	18.4166	18.344	18.4211	18.3709	18.4549	18.6357	18.514	18.4989	NO	NO
20 uM Staurosporine vs. DMSO	QLVSKPLSSSVSNNKR	2.09891	1.5835	YTHDC1	YTH domain-containing protein 1	Q96MU7	68	13.1788	16.3866	13.8553	12.8802	14.9213	16.5679	16.5162	16.6911	NO	NO
20 uM Staurosporine vs. DMSO	NTKDLNVK	-5.40458	1.58314	KIF20B	Kinesin-like protein KIF20B	Q96Q89	1214	14.0852	18.2709	18.5332	17.6147	10.1221	10.0201	8.83211	17.9113	NO	NO
20 uM Staurosporine vs. DMSO	SIFYVPDMKPSMFDVSR	0.163555	1.58104	TRAP1	Heat shock protein 75 kDa, mitochondrial	Q12931	341	16.0785	15.9549	15.9317	15.9394	16.1552	16.1585	16.0831	16.1619	NO	NO
20 uM Staurosporine vs. DMSO	SAALQSTQSQEEFKLEDLK	-0.574663	1.58038	AIDA	Axin interactor, dorsalization-associated protein	Q96BJ3	74	12.8501	12.5829	12.6176	12.8372	12.5088	11.9312	12.1118	12.0373	NO	NO
20 uM Staurosporine vs. DMSO	AAAAAAAGDSDSWDADAFSVEDPVRK	-0.239383	1.58001	EIF3J	Eukaryotic translation initiation factor 3 subunit J	O75822	2	18.1214	17.8299	17.7988	17.7602	17.6647	17.5497	17.7497	17.5886	NO	NO
20 uM Staurosporine vs. DMSO	VVVEYLR	0.205444	1.57997	EXOC3	Exocyst complex component 3	O60645	602	15.7714	15.8582	15.9748	15.9665	16.0946	16.0513	16.0226	16.2242	NO	NO
20 uM Staurosporine vs. DMSO	SAIPHPLIMGVIR	0.144796	1.57984	COPS2	COP9 signalosome complex subunit 2	P61201	226	16.8349	16.8978	16.9659	16.8193	17.0774	17.0117	17.0254	16.9826	NO	NO
20 uM Staurosporine vs. DMSO	ITTVNSVLPQNSVLGGVLK	0.60125	1.57978	RNF169	E3 ubiquitin-protein ligase RNF169	Q8NCN4	570	12.4472	12.2136	12.7003	12.8691	13.5258	13.0763	12.937	13.0962	NO	NO
20 uM Staurosporine vs. DMSO	LGQSDPAPLQHQMDIYQK	-0.891443	1.57964	TKT	Transketolase	P29401	187	12.8118	12.5401	12.7381	11.886	11.9501	10.9756	11.9416	11.5429	NO	NO
20 uM Staurosporine vs. DMSO	LILDFLNSK	1.36621	1.57943	WDR47	WD repeat-containing protein 47	O94967	17	8.09787	9.1991	8.80075	9.88674	9.99368	9.67634	10.7623	11.017	NO	NO
20 uM Staurosporine vs. DMSO	LLISLSQGNRDESTNVDMSLAQR	-0.40412	1.57878	ANXA11	Annexin A11	P50995	337	15.0316	14.6663	14.4934	14.8584	14.5501	14.1691	14.4793	14.2347	NO	NO
20 uM Staurosporine vs. DMSO	ITELTDENVK	0.603731	1.57785	POLR2C	DNA-directed RNA polymerase II subunit RPB3	P19387	11	12.2416	12.1654	12.7991	12.7919	13.3338	13.1139	12.9797	12.9854	NO	NO
20 uM Staurosporine vs. DMSO	IQSFDAETQQLLK	0.327475	1.57741	MIF4GD	MIF4G domain-containing protein	A9UHW6	11	15.2682	15.4291	15.5942	15.0515	15.7176	15.6132	15.5635	15.7585	NO	NO
20 uM Staurosporine vs. DMSO	VSGDIFSR	1.04272	1.57651	WASH3P	Putative WAS protein family homolog 3;WAS protein family homolog 2	C4AMC7	43	15.0682	16.0168	16.0262	15.3385	17.1429	15.5912	17.222	16.6645	NO	NO
20 uM Staurosporine vs. DMSO	VSESPSPVTTNTPAQFASVSPTVPEFLK	-0.766491	1.57638	MRTFB	Myocardin-related transcription factor B	Q9ULH7	206	14.0286	13.0187	13.0881	13.3102	12.7641	12.6709	12.8454	12.0992	NO	NO
20 uM Staurosporine vs. DMSO	QLAAAFHEEFVVREDLMGLAIGTHGSNIQQAR	-1.41524	1.57574	FXR1	RNA-binding protein FXR1	P51114	214	13.6942	12.4691	12.0974	11.8483	12.1929	10.5403	11.149	10.5658	NO	NO
20 uM Staurosporine vs. DMSO	VNTATTTVYR	0.723089	1.57566	TARS3	Threonine--tRNA ligase 2, cytoplasmic	A2RTX5	323	12.1156	11.5837	12.4405	11.6503	12.3506	12.8803	12.6868	12.7646	NO	NO
20 uM Staurosporine vs. DMSO	ADMLEMELK	1.29616	1.57535	MAD1L1	Mitotic spindle assembly checkpoint protein MAD1	Q9Y6D9	470	13.544	12.8791	13.4895	11.4343	14.0585	13.5077	14.5438	14.4216	NO	NO
20 uM Staurosporine vs. DMSO	VLSAPPHFHFGQTNRTPEFLR	-0.297836	1.57534	EEF1G	Elongation factor 1-gamma	P26641	31	15.4061	15.443	15.0935	15.4868	15.1696	14.9204	15.13	15.0181	NO	NO
20 uM Staurosporine vs. DMSO	VQAPHLSK	0.311847	1.57403	ARHGAP18	Rho GTPase-activating protein 18	Q8N392	581	13.8656	14.1215	14.1876	14.0343	14.2284	14.3952	14.3596	14.4732	NO	NO
20 uM Staurosporine vs. DMSO	ELIEIGCEDKTLAFK	-1.59323	1.57387	MLH1	DNA mismatch repair protein Mlh1	P40692	227	11.9988	12.1097	12.5309	12.6418	8.96727	11.4233	10.7717	11.7461	NO	NO
20 uM Staurosporine vs. DMSO	DITFVAEFLTEHFNEAPDLYNRK	-0.882025	1.57337	ANAPC4	Anaphase-promoting complex subunit 4	Q9UJX5	444	11.9152	11.6542	11.2409	12.0987	10.8927	10.9345	11.249	10.3047	NO	NO
20 uM Staurosporine vs. DMSO	FLVQEIMFDR	0.204381	1.57311	NCAPD3	Condensin-2 complex subunit D3	P42695	443	15.8381	15.8444	15.8327	15.6026	15.9132	15.9894	16.0039	16.0288	NO	NO
20 uM Staurosporine vs. DMSO	MLDFETFLPILQHISR	0.23744	1.57229	MYL4	Myosin light chain 4	P12829	110	15.3632	15.3332	15.6135	15.3226	15.5941	15.7254	15.5745	15.6881	NO	NO
20 uM Staurosporine vs. DMSO	QDDIDLQKDDEDTR	-1.93692	1.57228	TERF2IP	Telomeric repeat-binding factor 2-interacting protein 1	Q9NYB0	365	12.961	12.4714	9.77865	10.8646	9.75151	9.8535	8.76751	9.95548	NO	NO
20 uM Staurosporine vs. DMSO	YLLVPAFQGALTMK	0.252834	1.57124	IGBP1	Immunoglobulin-binding protein 1	P78318	78	15.6422	15.634	15.6867	15.4509	15.9782	15.79	15.683	15.9739	NO	NO
20 uM Staurosporine vs. DMSO	VLEVGFGMAIAASK	-0.535776	1.57022	GAMT	Guanidinoacetate N-methyltransferase	Q14353	64	13.6943	13.6014	13.545	13.3112	13.3199	12.9564	13.1488	12.5837	NO	NO
20 uM Staurosporine vs. DMSO	LAAFWLMK	0.218518	1.57018	RMDN1	Regulator of microtubule dynamics protein 1	Q96DB5	278	15.1965	15.0052	15.2236	15.0266	15.3422	15.3488	15.2707	15.3644	NO	NO
20 uM Staurosporine vs. DMSO	KGGLIGLAACSIALGKDSGLYLK	-0.778881	1.57007	VAC14	Protein VAC14 homolog	Q08AM6	70	11.5589	11.3331	11.2669	11.5238	10.8685	10.2101	10.9637	10.5248	NO	NO
20 uM Staurosporine vs. DMSO	KQPPVSPGTALVGSQKEPSEVPTPK	-0.374415	1.56988	HMGA1	High mobility group protein HMG-I/HMG-Y	P17096	31	16.8937	16.7048	16.4666	16.6968	15.9569	16.3898	16.5476	16.37	NO	NO
20 uM Staurosporine vs. DMSO	APPSFPAPPPWPK	-0.808574	1.56966	FBRSL1	Fibrosin-1-like protein	Q9HCM7	739	12.2542	12.5073	12.2132	12.0122	11.3999	11.2011	12.113	11.0386	NO	NO
20 uM Staurosporine vs. DMSO	TTTPYFL	0.398898	1.56959	PPP6C	Serine/threonine-protein phosphatase 6 catalytic subunit	O00743	299	14.9244	14.935	14.5152	14.4208	14.9069	15.0639	15.2034	15.2167	NO	NO
20 uM Staurosporine vs. DMSO	SIPMTVDFIR	0.291963	1.56881	HPRT1	Hypoxanthine-guanine phosphoribosyltransferase	P00492	92	15.5731	15.6196	15.6373	15.436	15.9928	15.8928	15.5674	15.981	NO	NO
20 uM Staurosporine vs. DMSO	MFSLDSFRK	0.41468	1.56878	DHX30	ATP-dependent RNA helicase DHX30	Q7L2E3	1	13.4744	13.3376	13.0559	13.027	13.564	13.6841	13.627	13.6785	NO	NO
20 uM Staurosporine vs. DMSO	AQQEFAAGVFSNPAVR	0.16883	1.56798	SCAMP3	Secretory carrier-associated membrane protein 3	O14828	314	16.0089	16.1472	16.2064	16.1478	16.3474	16.3117	16.2688	16.2578	NO	NO
20 uM Staurosporine vs. DMSO	DTSQYVVGELAALENEQK	-1.01728	1.5679	EHBP1	EH domain-binding protein 1	Q8NDI1	1069	10.1047	10.9393	10.9058	10.4325	9.40168	9.67691	10.1645	9.07006	NO	NO
20 uM Staurosporine vs. DMSO	ALSSLHGDDQDSEDEVLTIPEVK	-0.518315	1.56771	IGF2R	Cation-independent mannose-6-phosphate receptor	P11717	2398	13.8851	13.7603	13.506	13.8279	12.8413	13.1061	13.5368	13.4219	NO	NO
20 uM Staurosporine vs. DMSO	RVPCAYDKTALALEVGDIVK	-0.286823	1.56768	CRKL	Crk-like protein	P46109	246	19.4195	19.091	18.9823	19.1713	19.0263	18.6957	18.9592	18.8355	NO	NO
20 uM Staurosporine vs. DMSO	AGTFQAFEQFGQQLLAHGHYASPEIK	1.13382	1.56767	SPTAN1	Spectrin alpha chain, non-erythrocytic 1	Q13813	1392	9.18372	9.08173	10.0657	8.97974	10.6311	10.733	9.64705	10.835	NO	NO
20 uM Staurosporine vs. DMSO	SAQGTGFELGQLQSIR	1.52442	1.5676	ZDHHC5	Palmitoyltransferase ZDHHC5	Q9C0B5	432	8.88087	10.9359	9.76288	10.9509	12.4666	10.9027	11.5326	11.7263	NO	NO
20 uM Staurosporine vs. DMSO	KHELMQYDLEMAAQDLASK	-1.1038	1.56745	SNX4	Sorting nexin-4	O95219	320	11.6456	11.0139	11.2175	10.6414	9.28961	10.1399	9.894	10.7797	NO	NO
20 uM Staurosporine vs. DMSO	KRLPDGLTR	-1.2121	1.56741	MCM5	DNA replication licensing factor MCM5	P33992	363	15.2409	15.5579	15.5102	15.7415	13.4058	15.5226	14.7581	13.5158	NO	NO
20 uM Staurosporine vs. DMSO	NQLPLVVDAICTR	0.550279	1.56714	ANKFY1	Rabankyrin-5	Q9P2R3	665	13.1706	14.0148	13.5055	13.5168	14.3686	14.2033	13.9005	13.9365	NO	NO
20 uM Staurosporine vs. DMSO	APHLVGPHLGLETGNGGGVINLNAFDPTLPK	-0.559356	1.56705	FAHD2A	Fumarylacetoacetate hydrolase domain-containing protein 2A	Q96GK7	34	13.068	12.6498	13.0837	13.2471	12.2042	12.4326	12.4961	12.6784	NO	NO
20 uM Staurosporine vs. DMSO	LDLERETIELVHTEPTDVAQLPSRVPR	-0.504647	1.56638	TWF2	Twinfilin-2	Q6IBS0	205	14.7696	14.1979	14.1683	14.5886	13.5729	14.0867	13.9424	14.1038	NO	NO
20 uM Staurosporine vs. DMSO	KVVGSMPTAGSAGSVPENLNLFPEPGSK	-0.809536	1.56579	SMAP2	Stromal membrane-associated protein 2	Q8WU79	227	16.3223	15.6811	15.3566	15.3449	15.0045	15.2047	15.1522	14.1054	NO	NO
20 uM Staurosporine vs. DMSO	LRHDVMAHVHTFGHCCPK	1.03558	1.565	ADSL	Adenylosuccinate lyase	P30566	84	9.36875	9.39846	10.479	9.29647	11.0474	10.3486	10.7708	10.5183	NO	NO
20 uM Staurosporine vs. DMSO	YIPLIVDICCK	0.433318	1.56498	ARHGAP21	Rho GTPase-activating protein 21	Q5T5U3	1160	13.0915	13.27	13.5519	13.3154	13.5909	13.984	13.6154	13.7717	NO	NO
20 uM Staurosporine vs. DMSO	GRRPEHGGPPELFYDETEAR	-0.580319	1.56464	BUD23	Probable 18S rRNA (guanine-N(7))-methyltransferase	O43709	5	14.3156	14.3436	13.6894	14.005	13.9349	13.3209	13.5593	13.2172	NO	NO
20 uM Staurosporine vs. DMSO	SDTPAMLNPANVPTHLMVLCCVLR	-1.31576	1.56451	FAM120A	Constitutive coactivator of PPAR-gamma-like protein 1	Q9NZB2	697	14.0943	13.0714	13.2088	13.5706	11.93	12.8877	12.9921	10.8721	NO	NO
20 uM Staurosporine vs. DMSO	TRTPASINATPANINLADLTR	-0.255998	1.56388	SUPT6H	Transcription elongation factor SPT6	Q7KZ85	1530	15.3149	15.2008	15.0567	15.3985	15.0821	14.9239	14.9911	14.9499	NO	NO
20 uM Staurosporine vs. DMSO	TTKNEVVGR	2.03238	1.56329	SYT11	Synaptotagmin-11	Q9BT88	387	12.631	9.57423	12.4826	9.67622	13.3284	13.1128	12.7704	13.282	NO	NO
20 uM Staurosporine vs. DMSO	IVYLCITDDDFER	-0.659244	1.56226	VAMP7	Vesicle-associated membrane protein 7	P51809	60	13.1868	13.5424	13.161	13.5488	12.1831	12.609	13.1891	12.8207	NO	NO
20 uM Staurosporine vs. DMSO	GGPDFSNLEK	0.171796	1.56191	NUDCD2	NudC domain-containing protein 2	Q8WVJ2	148	20.2105	20.1299	20.3134	20.0587	20.3307	20.4405	20.2875	20.341	NO	NO
20 uM Staurosporine vs. DMSO	TSGESEEIEMVIMER	-1.33437	1.56152	CLEC16A	Protein CLEC16A	Q2KHT3	429	11.6678	10.46	9.73833	10.5619	9.10313	9.00114	10.0871	8.89915	NO	NO
20 uM Staurosporine vs. DMSO	RQQLVYR	-1.38787	1.56059	WDR4	tRNA (guanine-N(7)-)-methyltransferase non-catalytic subunit WDR4	P57081	277	13.7694	11.5969	11.9961	13.3887	10.82	11.6057	11.1679	11.606	NO	NO
20 uM Staurosporine vs. DMSO	YKSEALGVGDVKLPCEMDAQGPK	-0.662828	1.56035	TES	Testin	Q9UGI8	182	13.9653	13.4049	13.4334	13.6676	12.4677	12.7728	13.4315	13.1479	NO	NO
20 uM Staurosporine vs. DMSO	GIITWGLLPGPYHR	0.915365	1.56015	MSTO1	Protein misato homolog 1	Q9BUK6	257	13.1998	12.7498	12.804	12.0815	13.8406	14.0268	13.851	12.778	NO	NO
20 uM Staurosporine vs. DMSO	HGNFEER	-1.30898	1.56001	PPFIA3	Liprin-alpha-3	O75145	392	12.3639	11.5295	12.6179	12.6312	12.1867	10.9753	10.0925	10.6521	NO	NO
20 uM Staurosporine vs. DMSO	MAQDLKDIIEHLNTSGAPADTSDPLQQICK	-0.969259	1.55998	NUP62	Nuclear pore glycoprotein p62	P37198	447	14.308	12.9432	13.4317	13.466	11.8828	12.538	13.1889	12.6622	NO	NO
20 uM Staurosporine vs. DMSO	VLYLGAASGTTVSHVSDIVGPDGLVYAVEFSHR	-0.263076	1.55975	FBL	rRNA 2'-O-methyltransferase fibrillarin	P22087	163	16.7136	16.7468	16.7883	16.8271	16.3045	16.6146	16.7281	16.3763	NO	NO
20 uM Staurosporine vs. DMSO	FNLSVTDASR	-2.47602	1.55916	NARF	Nuclear prelamin A recognition factor	Q9UHQ1	110	12.9351	13.5602	14.0846	13.7383	13.389	8.86422	9.95021	12.2107	NO	NO
20 uM Staurosporine vs. DMSO	ELQNTVANLHVR	0.863573	1.55845	SCAMP2	Secretory carrier-associated membrane protein 2	O15127	105	11.1537	11.8497	12.0668	10.8939	12.6411	12.35	12.2237	12.2036	NO	NO
20 uM Staurosporine vs. DMSO	QQPTQFINPETPGYVGFANLPNQVHRK	-0.249343	1.5584	SEPTIN2	Septin-2	Q15019	4	16.1569	16.1397	15.8277	16.1678	15.8786	15.8909	15.8026	15.7227	NO	NO
20 uM Staurosporine vs. DMSO	NLEPEWAAAASEVKEQTKGK	-0.79183	1.55818	PDIA6	Protein disulfide-isomerase A6	Q15084	195	14.0181	13.3494	12.7002	13.3229	12.3047	12.3462	12.7133	12.8591	NO	NO
20 uM Staurosporine vs. DMSO	YEGSYALTSEEAERSDGDPVQPAVLQVHQTS	-1.07372	1.55782	CAVIN2	Caveolae-associated protein 2	O95810	395	12.7172	12.0176	12.3911	11.5921	11.9771	10.479	10.9477	11.0193	NO	NO
20 uM Staurosporine vs. DMSO	NECLEAGTLFQDPSFPAIPSALGFK	-1.64335	1.55761	CAPN2	Calpain-2 catalytic subunit	P17655	37	11.3236	9.96856	12.3182	11.1057	10.5238	8.81342	8.80876	9.99673	NO	NO
20 uM Staurosporine vs. DMSO	ETTVGAVTVTHK	0.949332	1.55754	TNPO3	Transportin-3	Q9Y5L0	882	12.9472	13.5	14.0249	12.6027	14.2004	13.8443	13.9195	14.908	NO	NO
20 uM Staurosporine vs. DMSO	GPPPEPAASAAQGTGDPDWEAPGLPPAK	-2.30001	1.55685	BICRA	BRD4-interacting chromatin-remodeling complex-associated protein	Q9NZM4	1446	13.2759	12.9754	15.3113	13.4706	13.1967	10.6976	9.50961	12.4293	NO	NO
20 uM Staurosporine vs. DMSO	TNIQNLNQLR	-0.888997	1.55684	AKAP9	A-kinase anchor protein 9	Q99996	2584	11.0119	10.7702	10.7549	10.0531	10.0045	9.68042	9.79039	9.55875	NO	NO
20 uM Staurosporine vs. DMSO	MFSFNMFDHPIPR	0.24529	1.55571	UFD1	Ubiquitin recognition factor in ER-associated degradation protein 1	Q92890	1	17.0476	17.2258	17.2576	16.8397	17.345	17.3293	17.3224	17.3552	NO	NO
20 uM Staurosporine vs. DMSO	QAGGFLGPPPPSGK	1.13105	1.55504	TMCO1	Calcium load-activated calcium channel	Q9UM00	224	14.0696	13.4685	14.1639	12.1582	14.4545	14.2815	14.7854	14.8631	NO	NO
20 uM Staurosporine vs. DMSO	EDIYSGGGGGGSR	0.29563	1.55374	HNRNPA0	Heterogeneous nuclear ribonucleoprotein A0	Q13151	177	15.4973	15.2677	15.0625	15.3866	15.6879	15.6382	15.4276	15.6429	NO	NO
20 uM Staurosporine vs. DMSO	RIFHTVTTTDDPVIR	2.20214	1.55373	EIF3D	Eukaryotic translation initiation factor 3 subunit D	O15371	222	12.3024	9.74619	8.76219	11.9588	12.0433	12.5129	13.5382	13.4836	NO	NO
20 uM Staurosporine vs. DMSO	IAPPEAPVTGYMFGK	1.17175	1.55312	PARP1	Poly [ADP-ribose] polymerase 1	P09874	879	11.7497	13.0243	13.5003	12.7781	14.8969	13.6265	13.7343	13.4816	NO	NO
20 uM Staurosporine vs. DMSO	EMAEQFR	0.152542	1.55231	FAF1	FAS-associated factor 1	Q9UNN5	532	16.0744	16.1711	16.0993	16.1788	16.3222	16.2537	16.2308	16.327	NO	NO
20 uM Staurosporine vs. DMSO	HLQLAVR	0.187525	1.55219	H2AC21	Histone H2A type 2-B	Q8IUE6	83	16.8823	16.8454	16.8981	16.9522	17.0652	17.1619	16.9125	17.1885	NO	NO
20 uM Staurosporine vs. DMSO	VGEEEHVYSFPNK	0.483212	1.55133	PXN	Paxillin	P49023	111	13.3394	13.0678	13.107	13.3654	14.1065	13.6523	13.5905	13.4631	NO	NO
20 uM Staurosporine vs. DMSO	KQTIDNSQGAYQEAFDISKK	-0.189094	1.55092	YWHAQ	14-3-3 protein theta	P27348	139	16.7286	16.6481	16.4791	16.7557	16.4325	16.4846	16.4434	16.4946	NO	NO
20 uM Staurosporine vs. DMSO	SLVHAGVPASYLLIPAASYVLPEVSK	-0.436294	1.5508	EIF2B4	Translation initiation factor eIF2B subunit delta	Q9UI10	375	14.8058	14.4462	14.162	14.4261	14.2276	13.7856	14.0888	13.9929	NO	NO
20 uM Staurosporine vs. DMSO	EFRPLSCLLVLLGWTHCQSLESAKR	2.70108	1.55074	ZFYVE26	Zinc finger FYVE domain-containing protein 26	Q68DK2	361	8.38545	9.83414	4.66203	8.27572	10.6599	10.7619	9.67592	10.8639	NO	NO
20 uM Staurosporine vs. DMSO	TYFEDNPR	0.477733	1.54885	DDX56	Probable ATP-dependent RNA helicase DDX56	Q9NY93	462	14.9994	14.9203	14.5534	14.4692	15.4031	14.9412	15.5103	14.9985	NO	NO
20 uM Staurosporine vs. DMSO	MAEYYRPGPAGSGGCGSTIGPLPHDVEVAIR	1.1307	1.54857	MED12	Mediator of RNA polymerase II transcription subunit 12	Q93074	201	9.19514	9.01418	10.0772	8.99117	10.6196	10.7216	9.63562	10.8236	NO	NO
20 uM Staurosporine vs. DMSO	ARPDDGELKELYGLYK	0.457271	1.54826	ACBD7	Acyl-CoA-binding domain-containing protein 7	Q8N6N7	19	12.8974	12.8202	13.1444	12.625	13.3483	13.2753	13.4801	13.2124	NO	NO
20 uM Staurosporine vs. DMSO	EKPLPTFKDLDFLQDIPDGLFLDADVHNALCK	1.44449	1.54807	PIPSL	Putative PIP5K1A and PSMD4-like protein	A2A3N6	222	9.17702	9.07503	10.059	7.78392	10.6377	10.7397	9.65375	10.8417	NO	NO
20 uM Staurosporine vs. DMSO	SLQTLPTDSSTFDTDTFCPPRPKPVAR	-1.40873	1.5474	MIEF1	Mitochondrial dynamics protein MIEF1	Q9NQG6	94	11.3018	9.87398	10.858	9.77199	9.72705	8.63198	9.59515	8.21663	NO	NO
20 uM Staurosporine vs. DMSO	MQLSEIMER	0.237074	1.54716	NOP14	Nucleolar protein 14	P78316	817	16.2716	16.1498	16.299	16.0375	16.4989	16.3114	16.5715	16.3243	NO	NO
20 uM Staurosporine vs. DMSO	TGSGGPGNHPHGPDASAEGLNPYGLVAPR	-0.215629	1.54707	FERMT3	Fermitin family homolog 3	Q86UX7	482	17.1479	16.8999	16.8005	17.0217	16.7016	16.7379	16.8356	16.7325	NO	NO
20 uM Staurosporine vs. DMSO	QKEHLDTLNKK	1.23641	1.54659	SMC6	Structural maintenance of chromosomes protein 6	Q96SB8	822	12.1206	11.7217	10.2757	10.3458	12.6552	12.2605	12.1316	12.3622	NO	NO
20 uM Staurosporine vs. DMSO	IFEYETQRR	-1.28544	1.54655	EMD	Emerin	P50402	38	12.7797	12.385	11.5837	12.4955	10.5803	10.0798	11.3744	12.0676	NO	NO
20 uM Staurosporine vs. DMSO	SGYHDDSDEDLLE	-1.70832	1.54654	SORT1	Sortilin	Q99523	819	12.3737	13.2017	13.318	13.3298	12.4349	10.1188	12.6155	10.2208	NO	NO
20 uM Staurosporine vs. DMSO	KGEKDIPGLTDTTVPR	-0.26248	1.54635	RPS6	Small ribosomal subunit protein eS6	P62753	116	18.2923	17.9765	17.7905	18.0284	17.7206	17.7877	17.8211	17.7085	NO	NO
20 uM Staurosporine vs. DMSO	VTVIPFYMGMR	0.533034	1.54612	POLDIP2	Polymerase delta-interacting protein 2	Q9Y2S7	243	13.9157	13.6696	13.5705	13.0064	14.2156	13.9446	14.037	14.0971	NO	NO
20 uM Staurosporine vs. DMSO	YVGVSSDSVGGFR	0.152058	1.54548	CLINT1	Clathrin interactor 1	Q14677	159	16.9402	16.8271	17.0219	16.8857	17.0299	17.0929	17.0453	17.1149	NO	NO
20 uM Staurosporine vs. DMSO	MFQLPVNNLGSLR	0.413565	1.5448	ADNP	Activity-dependent neuroprotector homeobox protein	Q9H2P0	1	15.2083	15.6014	15.6495	15.0207	15.7179	15.8779	15.6094	15.9289	NO	NO
20 uM Staurosporine vs. DMSO	INPSSMFDVQVK	-2.4537	1.54405	PYGL	Glycogen phosphorylase, liver form	P06737	558	14.2976	10.5894	9.60537	10.6914	8.97371	8.87172	8.75373	8.76974	NO	NO
20 uM Staurosporine vs. DMSO	IQAIIESCSR	2.02491	1.54372	NOL4L	Nucleolar protein 4-like	Q96MY1	216	9.42085	12.3683	12.163	9.21688	12.6355	12.6708	13.0044	12.9581	NO	NO
20 uM Staurosporine vs. DMSO	KGGPSPGDVEAIK	-0.211275	1.54365	SNRPA1	U2 small nuclear ribonucleoprotein A'	P09661	193	15.8912	15.8931	15.8483	15.963	15.5134	15.7472	15.6754	15.8145	NO	NO
20 uM Staurosporine vs. DMSO	AQWITYETTQEMLNYAK	0.958179	1.54361	KNTC1	Kinetochore-associated protein 1	P50748	478	10.9035	11.3393	11.7393	11.6317	13.1467	12.1943	11.7261	12.3794	NO	NO
20 uM Staurosporine vs. DMSO	ISSSQQHPHLR	0.441162	1.54354	NF1	Neurofibromin	P21359	2584	12.6511	13.1259	12.9965	12.9806	13.2239	13.3821	13.4834	13.4295	NO	NO
20 uM Staurosporine vs. DMSO	SQAEDVRVEGSFPVTMLPGDGVGPELMHAVK	-1.31871	1.54339	IDH3B	Isocitrate dehydrogenase [NAD] subunit beta, mitochondrial	O43837	38	12.0381	11.8017	10.4611	11.7986	10.758	9.36711	10.8189	9.88065	NO	NO
20 uM Staurosporine vs. DMSO	LLELDQVEGTGRPDPQAGFK	-0.245321	1.5431	DOK3	Docking protein 3	Q7L591	456	16.3349	16.2351	15.9756	16.2505	15.9456	16.0726	15.9554	15.8413	NO	NO
20 uM Staurosporine vs. DMSO	LISQGTIEESMLK	0.201425	1.54296	SMARCAD1	SWI/SNF-related matrix-associated actin-dependent regulator of chromatin subfamily A containing DEAD/H box 1	Q9H4L7	977	15.252	15.3518	15.1944	15.2207	15.5582	15.411	15.4852	15.3701	NO	NO
20 uM Staurosporine vs. DMSO	ENVEAAQSYR	0.188686	1.54283	CRLF3	Cytokine receptor-like factor 3	Q8IUI8	18	15.8449	15.6659	15.89	15.697	15.9888	15.9421	15.9443	15.9774	NO	NO
20 uM Staurosporine vs. DMSO	ELSAVTFPDIIR	0.221422	1.54189	STAT1	Signal transducer and activator of transcription 1-alpha/beta	P42224	638	15.8889	16.0775	15.8858	16.0679	16.1641	16.3613	16.091	16.1893	NO	NO
20 uM Staurosporine vs. DMSO	FDFEQVTVK	0.803169	1.54017	DGCR8	Microprocessor complex subunit DGCR8	Q8WYQ5	448	11.5553	10.6939	10.7999	11.3348	11.7142	12.2546	11.9005	11.7273	NO	NO
20 uM Staurosporine vs. DMSO	LNPQYPMFR	0.133567	1.53986	PPP2R5D	Serine/threonine-protein phosphatase 2A 56 kDa regulatory subunit delta isoform	Q14738	515	17.9472	17.8687	17.8221	17.7922	18.0371	17.9993	17.9978	17.9304	NO	NO
20 uM Staurosporine vs. DMSO	GGELIGNFVR	2.85677	1.5392	PDCL	Phosducin-like protein	Q13371	241	8.94676	13.1213	11.2734	8.74278	11.5627	13.3196	14.7585	13.8706	NO	NO
20 uM Staurosporine vs. DMSO	SAAQWPWKK	-1.151	1.53772	POGLUT1	Protein O-glucosyltransferase 1	Q8NBL1	194	11.5859	10.7617	10.7697	11.4441	9.54441	9.6464	11.0182	9.74839	NO	NO
20 uM Staurosporine vs. DMSO	LLRDDEAHLQEDQGEEECFHDCSASFEEEPGADKVENK	-2.19725	1.53746	TTC1	Tetratricopeptide repeat protein 1	Q99614	45	13.5804	10.1733	10.3768	13.0324	9.68522	9.8909	8.80491	9.99288	NO	NO
20 uM Staurosporine vs. DMSO	AHQAHAVVAEEVAALTGELER	-0.42087	1.5372	ZNHIT2	Zinc finger HIT domain-containing protein 2	Q9UHR6	364	15.2217	14.9714	14.5564	15.0455	14.3469	14.5314	14.7581	14.4751	NO	NO
20 uM Staurosporine vs. DMSO	AVLQLPGLTQVR	-0.802882	1.53705	MRPS7	Small ribosomal subunit protein uS7m	Q9Y2R9	22	14.6013	15.1278	14.4552	14.9689	14.287	13.0817	14.3686	14.2045	NO	NO
20 uM Staurosporine vs. DMSO	QLLHWCGDDFDGVIVFDECHK	-0.936221	1.53703	SBNO1	Protein strawberry notch homolog 1	A3KN83	420	11.8802	12.4157	12.5512	12.2767	10.9366	10.8772	12.1959	11.3692	NO	NO
20 uM Staurosporine vs. DMSO	RIDTPSLEEPSDLEELEQFAK	-0.337059	1.53686	POU2F1	POU domain, class 2, transcription factor 1	P14859	273	14.6718	14.581	14.3664	14.5562	14.2481	14.3978	13.9533	14.2279	NO	NO
20 uM Staurosporine vs. DMSO	SFIKWCNSGSQEEGYSQYQR	-1.66922	1.5366	THOC7	THO complex subunit 7 homolog	Q6I9Y2	33	12.8621	11.5712	13.048	12.1252	12.215	9.29787	10.4859	10.9309	NO	NO
20 uM Staurosporine vs. DMSO	YLVVNDNQISQWSFFNELEKLPSLR	-0.96415	1.53655	TBCE	Tubulin-specific chaperone E	Q15813	311	11.5529	11.4325	11.3481	11.286	10.9348	9.58271	10.8495	10.3959	NO	NO
20 uM Staurosporine vs. DMSO	NGITKMEESAEYEAAR	-2.42125	1.5364	TADA2B	Transcriptional adapter 2-beta	Q86TJ2	297	13.601	10.8339	14.1197	12.6591	8.72917	10.9011	9.71317	12.1851	NO	NO
20 uM Staurosporine vs. DMSO	VAVNALAVGEPGTASKPASPIGGPTQEEK	-1.3239	1.53627	EP400	E1A-binding protein p400	Q96L91	1714	12.2601	11.6739	10.8289	12.0265	9.86793	9.96992	11.584	10.0719	NO	NO
20 uM Staurosporine vs. DMSO	VGVPSTMDLVK	0.152338	1.53617	DDX50	ATP-dependent RNA helicase DDX50	Q9BQ39	514	16.2425	16.1831	16.2768	16.1583	16.2967	16.3854	16.4243	16.3637	NO	NO
20 uM Staurosporine vs. DMSO	AVAAAHTFFVGNPEHMEMQQNLDYYQTMSGVK	-1.42568	1.53614	P3H1	Prolyl 3-hydroxylase 1	Q32P28	162	13.556	11.6785	12.6198	13.8214	11.9556	12.1781	11.0061	10.8332	NO	NO
20 uM Staurosporine vs. DMSO	SAVLQPGCPSVGIPHSGYVNAQLEK	-0.383765	1.5361	VPS18	Vacuolar protein sorting-associated protein 18 homolog	Q9P253	15	14.6599	14.2185	14.2318	14.1807	13.9888	13.7481	14.0661	13.9529	NO	NO
20 uM Staurosporine vs. DMSO	QIESTETSCHGCR	0.786958	1.53584	RNF114	E3 ubiquitin-protein ligase RNF114	Q9Y508	83	11.2055	11.1146	10.4586	10.4813	11.7402	11.7123	11.3948	11.5604	NO	NO
20 uM Staurosporine vs. DMSO	IFGESIMIGVKPCIDK	-0.760037	1.53561	NUP35	Nucleoporin NUP35	Q8NFH5	231	13.1967	13.3492	12.8445	12.8217	12.4134	12.444	12.7314	11.5831	NO	NO
20 uM Staurosporine vs. DMSO	YAWQGVALLPFVDER	1.65103	1.53469	XRN2	5'-3' exoribonuclease 2	Q9H0D6	642	8.68354	11.7733	10.0167	9.54209	11.1922	11.865	11.7425	11.8201	NO	NO
20 uM Staurosporine vs. DMSO	QNVQVFEFQLTAEDMK	-1.03492	1.53433	AKR1C3	Aldo-keto reductase family 1 member C3	P42330	279	14.1494	13.2943	14.0471	13.2478	13.7027	12.4874	12.2385	12.1702	NO	NO
20 uM Staurosporine vs. DMSO	AGELWLPHGTVATPVFMPVGTQATMK	1.10345	1.53415	QTRT1	Queuine tRNA-ribosyltransferase catalytic subunit 1	Q9BXR0	30	9.18445	9.08246	10.0665	8.98047	10.6303	10.6167	9.64632	10.8343	NO	NO
20 uM Staurosporine vs. DMSO	AISHEHSPSDLEAHFVPLVK	-0.460181	1.53376	PPP2R1A	Serine/threonine-protein phosphatase 2A 65 kDa regulatory subunit A alpha isoform	P30153	114	13.8596	13.6173	13.4597	13.8121	13.561	13.0327	13.2051	13.1091	NO	NO
20 uM Staurosporine vs. DMSO	ELTNDERK	-0.92713	1.53375	NKRF	NF-kappa-B-repressing factor	O15226	627	10.1481	10.3346	10.3049	10.3608	9.50629	8.7117	9.88836	9.33363	NO	NO
20 uM Staurosporine vs. DMSO	QAQAAVLAVLPR	0.125307	1.53353	EBNA1BP2	Probable rRNA-processing protein EBP2	Q99848	111	18.9705	18.9583	19.0758	18.9822	19.0681	19.1908	19.1433	19.0858	NO	NO
20 uM Staurosporine vs. DMSO	FPGIWAHGDYCR	0.771106	1.53332	AACS	Acetoacetyl-CoA synthetase	Q86V21	515	9.68282	9.54617	9.51915	9.47884	10.132	10.2339	10.6096	10.3359	NO	NO
20 uM Staurosporine vs. DMSO	NDYVAAER	0.255108	1.53316	NAPG	Gamma-soluble NSF attachment protein	Q99747	208	16.1099	15.7738	15.8343	15.7221	16.1019	16.1771	16.002	16.1795	NO	NO
20 uM Staurosporine vs. DMSO	VLFPSEK	-1.09076	1.53311	USP42	Ubiquitin carboxyl-terminal hydrolase 42	Q9H9J4	92	11.4805	11.2802	10.271	10.0162	9.59463	9.69662	9.595	9.79861	NO	NO
20 uM Staurosporine vs. DMSO	YGSMEIFQSK	0.463822	1.53248	CWF19L2	CWF19-like protein 2	Q2TBE0	259	13.3781	13.7382	14.0997	13.539	14.3262	14.1451	13.9959	14.1432	NO	NO
20 uM Staurosporine vs. DMSO	EAPAGALAAVLK	0.145946	1.53222	DHPS	Deoxyhypusine synthase	P49366	8	19.4856	19.6319	19.5944	19.6418	19.6913	19.8428	19.6845	19.719	NO	NO
20 uM Staurosporine vs. DMSO	VGNTGGPPHTHGASR	-1.91679	1.5319	CBX2	Chromobox protein homolog 2	Q14781	321	8.88007	8.87192	10.5398	9.35183	8.2941	5.51544	8.36685	7.80006	NO	NO
20 uM Staurosporine vs. DMSO	MMEEVEKLCDRLELASLQCLNETLTSCTK	-1.17125	1.53183	DNAJC2	DnaJ homolog subfamily C member 2	Q99543	376	13.633	12.5699	12.8033	12.6675	12.1046	10.7215	12.6293	11.5333	NO	NO
20 uM Staurosporine vs. DMSO	ERHGNVASLVQR	0.256305	1.53154	CD2AP	CD2-associated protein	Q9Y5K6	73	15.376	15.4051	15.5287	15.3512	15.7501	15.4369	15.8177	15.6815	NO	NO
20 uM Staurosporine vs. DMSO	LGWSQPLGNLQAPLGYDKFSYSWR	-1.11674	1.5315	ASH2L	Set1/Ash2 histone methyltransferase complex subunit ASH2	Q9UBL3	438	10.4457	10.5477	9.56367	10.6497	9.01541	8.91343	9.99941	8.81144	NO	NO
20 uM Staurosporine vs. DMSO	CLSELTNR	0.558784	1.53081	WDCP	WD repeat and coiled-coil-containing protein	Q9H6R7	574	17.2825	16.2354	17.0223	16.8487	17.1549	17.5057	17.6043	17.3592	NO	NO
20 uM Staurosporine vs. DMSO	RGEQADHFTQTPLDPGSQVLVR	-0.321273	1.53009	AARSD1	Alanyl-tRNA editing protein Aarsd1	Q9BTE6	75	15.6239	15.5756	15.5557	15.7945	14.9792	15.4019	15.4528	15.4307	NO	NO
20 uM Staurosporine vs. DMSO	MVVDAVMMLDDLLQLK	1.91196	1.52994	CCT7	T-complex protein 1 subunit eta	Q99832	178	7.45717	6.47575	8.72127	9.80726	9.85781	9.75582	10.8418	9.65383	NO	NO
20 uM Staurosporine vs. DMSO	SLSSSATPLSSPAR	1.28487	1.52946	PRR36	Proline-rich protein 36	Q9H6K5	241	9.48145	9.58344	11.3184	10.3467	10.8463	11.5968	12.0199	11.4065	NO	NO
20 uM Staurosporine vs. DMSO	LQENPESCLSIVR	0.531658	1.5293	TTF1	Transcription termination factor 1	Q15361	701	12.8788	12.6739	12.9281	12.5183	13.5125	12.8918	13.2693	13.4521	NO	NO
20 uM Staurosporine vs. DMSO	AGWLATEAQVTQELK	-0.22957	1.5292	TUT1	Speckle targeted PIP5K1A-regulated poly(A) polymerase	Q9H6E5	801	15.3165	15.4619	15.476	15.3281	15.0885	15.2213	15.0519	15.3025	NO	NO
20 uM Staurosporine vs. DMSO	TALHFASCNGNDQIVQLLLDHGADPNQR	-0.319627	1.52913	ANKRD54	Ankyrin repeat domain-containing protein 54	Q6NXT1	145	15.2265	15.0253	15.0342	14.8825	14.6782	14.6968	14.9774	14.5376	NO	NO
20 uM Staurosporine vs. DMSO	VQMELGEDGSVYK	-1.97721	1.529	RGL2	Ral guanine nucleotide dissociation stimulator-like 2	O15211	654	15.0516	13.5717	14.5802	14.8052	10.665	11.8778	14.3808	13.1763	NO	NO
20 uM Staurosporine vs. DMSO	LGPGGLDPVEVYESLPEELQKCFDVK	-0.552516	1.52884	CDC37	Hsp90 co-chaperone Cdc37	Q16543	287	14.4184	14.0583	14.1294	14.4638	13.1603	13.8004	14.0484	13.8507	NO	NO
20 uM Staurosporine vs. DMSO	TSFSFQK	1.92272	1.52828	MAPKAP1	Target of rapamycin complex 2 subunit MAPKAP1	Q9BPZ7	509	8.96037	8.85838	9.84238	8.75639	9.86952	12.7359	11.8374	9.66554	NO	NO
20 uM Staurosporine vs. DMSO	AEGLDCSYTVLFGK	-2.19433	1.52797	ALKBH2	DNA oxidative demethylase ALKBH2	Q6NS38	62	12.5426	12.883	12.682	12.4895	9.22118	10.9417	12.8872	8.76973	NO	NO
20 uM Staurosporine vs. DMSO	ALGFLHSK	-1.93715	1.52791	INTS12	Integrator complex subunit 12	Q96CB8	16	10.8691	12.7031	13.3612	10.1709	9.43993	9.54191	10.7299	9.6439	NO	NO
20 uM Staurosporine vs. DMSO	NLDAQYEMAR	0.14493	1.52718	RSRC2	Arginine/serine-rich coiled-coil protein 2	Q7L4I2	402	16.8251	16.8457	17.001	16.8585	16.9962	17.0461	17.02	17.0478	NO	NO
20 uM Staurosporine vs. DMSO	LLEALQLSLPAEAQSKK	-0.658286	1.52717	ARHGAP6	Rho GTPase-activating protein 6	O43182	377	13.8941	13.7732	13.7136	13.7583	12.372	13.4778	13.2994	13.3567	NO	NO
20 uM Staurosporine vs. DMSO	ERTAADELEAFLGGGAPGGRHPGGGDYEEL	-0.400856	1.52696	RABL6	Rab-like protein 6	Q3YEC7	700	14.3731	13.9836	13.782	14.0392	13.7103	13.6412	13.7169	13.506	NO	NO
20 uM Staurosporine vs. DMSO	LTIMLEK	0.143893	1.52687	ERI1	3'-5' exoribonuclease 1	Q8IV48	277	16.1792	16.0994	16.2227	16.1639	16.2737	16.3154	16.3529	16.2987	NO	NO
20 uM Staurosporine vs. DMSO	AVPAALILR	0.434056	1.52639	COMMD10	COMM domain-containing protein 10	Q9Y6G5	2	15.0977	15.6325	15.5459	15.3786	15.6303	16.1427	15.595	16.023	NO	NO
20 uM Staurosporine vs. DMSO	VKEEVMDWSEVK	-1.42369	1.52638	ZNHIT6	Box C/D snoRNA protein 1	Q9NWK9	142	12.2155	12.2374	10.8859	12.5252	11.2053	11.3567	9.56643	10.0409	NO	NO
20 uM Staurosporine vs. DMSO	MIVSDIMQQAQYDQPLEK	1.68754	1.52601	AKAP10	A-kinase anchor protein 10, mitochondrial	O43572	641	9.88902	9.34043	7.85589	9.23844	10.3516	10.2496	12.3252	10.1476	NO	NO
20 uM Staurosporine vs. DMSO	ATFCLPILGVK	0.313046	1.52586	NSA2	Ribosome biogenesis protein NSA2 homolog	O95478	190	14.3933	14.7367	14.6664	14.6179	14.6823	15.0603	14.9672	14.9566	NO	NO
20 uM Staurosporine vs. DMSO	YKDAANLLNDALAIR	0.148751	1.52555	KLC1	Kinesin light chain 1	Q07866	271	15.9069	15.9276	15.953	15.9595	16.0159	16.1464	16.0836	16.0962	NO	NO
20 uM Staurosporine vs. DMSO	VTMINAIPVASLDPIKEWLNSCDLK	-1.02146	1.52517	SUPT16H	FACT complex subunit SPT16	Q9Y5B9	868	11.3444	10.7257	10.9316	11.5394	10.9678	9.90272	9.79322	9.7915	NO	NO
20 uM Staurosporine vs. DMSO	YMNATLKR	0.596204	1.52513	BAIAP2L1	Brain-specific angiogenesis inhibitor 1-associated protein 2-like protein 1	Q9UHR4	114	14.0746	13.7025	13.2942	13.0035	14.1841	14.0481	14.0964	14.1311	NO	NO
20 uM Staurosporine vs. DMSO	LGVADIIDCVVLTSSPEATETSQQLQLR	1.48494	1.52484	NFATC2IP	NFATC2-interacting protein	Q8NCF5	324	7.66471	8.03758	8.84214	7.94493	8.86928	8.76729	9.85328	10.9393	NO	NO
20 uM Staurosporine vs. DMSO	TYNFLPEFLVSTQK	0.577562	1.52456	SERPINB1	Leukocyte elastase inhibitor	P30740	97	12.5722	13.4485	12.9631	13.1808	13.7771	13.7354	13.3266	13.6357	NO	NO
20 uM Staurosporine vs. DMSO	VVQVYRK	-0.40822	1.5237	RPL26	Large ribosomal subunit protein uL24	P61254	70	17.3401	16.9419	17.095	17.0402	16.7895	16.7935	16.2513	16.9502	NO	NO
20 uM Staurosporine vs. DMSO	GTMDPALR	0.255459	1.52355	IPO7	Importin-7	O95373	12	15.7957	16.0003	15.8502	15.8269	16.375	16.028	16.0034	16.0886	NO	NO
20 uM Staurosporine vs. DMSO	MNYETVLSLEFPFPKPDMITR	-0.811192	1.52336	POGK	Pogo transposable element with KRAB domain	Q9P215	78	12.162	12.6122	12.4963	12.9035	12.1663	11.8837	11.0406	11.8387	NO	NO
20 uM Staurosporine vs. DMSO	TPQSAEEAFLLVATAYETLKDEETR	-1.23154	1.52333	DNAJC25	DnaJ homolog subfamily C member 25	Q9H1X3	93	10.9349	10.8329	9.54293	10.7309	8.87988	8.98187	10.1698	9.08386	NO	NO
20 uM Staurosporine vs. DMSO	AMQALLQIQQGLQTLQTEAPGLVPSLGSFGISR	-0.93154	1.52269	UBQLN4	Ubiquilin-4	Q9NRR5	465	13.8072	13.4716	12.6472	13.3641	11.5481	12.8261	12.6175	12.5724	NO	NO
20 uM Staurosporine vs. DMSO	SKVGDMLEK	0.573934	1.52265	PCID2	PCI domain-containing protein 2	Q5JVF3	132	14.1648	13.7478	14.1584	13.3163	14.1392	14.3337	14.5677	14.6425	NO	NO
20 uM Staurosporine vs. DMSO	ISIEGNKMPL	0.310559	1.52254	IWS1	Protein IWS1 homolog	Q96ST2	810	13.6357	13.8627	13.9012	13.7437	14.0217	14.0578	14.2365	14.0697	NO	NO
20 uM Staurosporine vs. DMSO	GMHICEDAVKR	-1.26837	1.52223	NUMB	Protein numb homolog	P49757	54	13.377	12.7917	11.5213	13.2229	11.9103	11.6674	10.5631	11.6986	NO	NO
20 uM Staurosporine vs. DMSO	ISNDPSPGYNIEQMAK	1.87035	1.52212	OSGEP	tRNA N6-adenosine threonylcarbamoyltransferase	Q9NPF4	170	9.67581	9.7778	8.7938	9.87979	12.1677	9.68329	10.7693	12.9884	NO	NO
20 uM Staurosporine vs. DMSO	DYQLNGLNWLAHSWCK	1.21047	1.52193	CHD1	Chromodomain-helicase-DNA-binding protein 1	O14646	483	9.71995	9.47896	11.2719	10.7448	11.235	11.6571	11.2395	11.9259	NO	NO
20 uM Staurosporine vs. DMSO	RGGVPSWFGL	0.247924	1.52135	MRPL23	Large ribosomal subunit protein uL23m	Q16540	144	14.747	14.7814	14.9695	14.7466	14.9789	15.2035	14.9726	15.0813	NO	NO
20 uM Staurosporine vs. DMSO	YNSLSILPAALGKPVR	0.336891	1.52067	PRXL2B	Prostamide/prostaglandin F synthase	Q8TBF2	108	15.2739	15.7428	15.7474	15.7696	16.0889	15.9543	16.0449	15.7932	NO	NO
20 uM Staurosporine vs. DMSO	LGPLQVAR	0.235126	1.52052	ETFB	Electron transfer flavoprotein subunit beta	P38117	99	18.0879	18.3669	18.4705	18.3683	18.417	18.6372	18.5547	18.6252	NO	NO
20 uM Staurosporine vs. DMSO	NIISPPWDFR	0.175905	1.52013	CDC16	Cell division cycle protein 16 homolog	Q13042	557	17.3214	17.3802	17.4042	17.2805	17.5728	17.6563	17.3973	17.4634	NO	NO
20 uM Staurosporine vs. DMSO	SYGRPPPDVEGMTSLKVDNLTYR	-0.171489	1.52003	SRSF2	Serine/arginine-rich splicing factor 2	Q01130	2	19.0927	18.8688	18.8484	18.9161	18.7363	18.6831	18.8448	18.7759	NO	NO
20 uM Staurosporine vs. DMSO	CELVLIHTYPVGEDSLVSDR	1.13804	1.5196	INTS13	Integrator complex subunit 13	Q9NVM9	202	10.0773	11.1867	10.5428	10.2703	12.4348	12.055	11.0838	11.0557	NO	NO
20 uM Staurosporine vs. DMSO	SAGYPGTLIPYR	-0.554708	1.51829	DHRS11	Dehydrogenase/reductase SDR family member 11	Q6UWP2	57	14.1061	13.9495	14.0015	14.8033	13.6691	13.5491	13.5056	13.9177	NO	NO
20 uM Staurosporine vs. DMSO	WPDPEDLLTPR	-1.22612	1.51792	GADD45GIP1	Large ribosomal subunit protein mL64	Q8TAE8	39	12.6408	12.0014	13.0941	12.9509	11.3924	12.4462	10.3282	11.6159	NO	NO
20 uM Staurosporine vs. DMSO	KICALDDNVCMAFAGLTADAR	-0.175607	1.51777	PSMA7	Proteasome subunit alpha type-7	O14818	61	15.4017	15.3304	15.3403	15.3648	15.2539	15.1339	15.192	15.1549	NO	NO
20 uM Staurosporine vs. DMSO	DVTTFFSGK	0.325775	1.51777	ARFGAP1	ADP-ribosylation factor GTPase-activating protein 1	Q8N6T3	289	15.9655	16.2074	16.3955	16.0075	16.2348	16.6457	16.5748	16.4235	NO	NO
20 uM Staurosporine vs. DMSO	NIPMTLELLQSTR	0.136128	1.51705	TCEA1	Transcription elongation factor A protein 1	P23193	33	19.8392	19.9336	19.94	19.8405	19.9183	20.0863	20.0597	20.0335	NO	NO
20 uM Staurosporine vs. DMSO	TLESQAVETEK	0.766085	1.51688	NLE1	Notchless protein homolog 1	Q9NVX2	76	11.4249	11.1302	10.6442	11.1647	12.2287	11.8314	11.8879	11.4803	NO	NO
20 uM Staurosporine vs. DMSO	KAQPPQAFRGDGVPR	0.244398	1.51636	ARID3A	AT-rich interactive domain-containing protein 3A	Q99856	176	15.1307	14.9231	14.9885	15.2369	15.2898	15.2523	15.4269	15.2879	NO	NO
20 uM Staurosporine vs. DMSO	KRPHVFESNPSIR	-1.59599	1.51574	NRF1	Nuclear respiratory factor 1	Q16656	92	11.7278	10.9598	10.7024	12.5914	10.4481	10.9979	9.15814	8.99321	NO	NO
20 uM Staurosporine vs. DMSO	FSDDAAEPNNDAEALVNGFEHGGLAK	-0.504823	1.5157	BICD2	Protein bicaudal D homolog 2	Q8TD16	285	13.4037	13.7845	13.3001	14.0214	13.2291	13.0025	13.15	13.1088	NO	NO
20 uM Staurosporine vs. DMSO	QAIGIEVELNEIESR	-0.596883	1.51562	NUP205	Nuclear pore complex protein Nup205	Q92621	683	14.3178	14.4146	14.244	13.8561	13.4233	13.7955	14.0835	13.1427	NO	NO
20 uM Staurosporine vs. DMSO	ITREEVEGESLDLCLQQLYK	-0.908667	1.51547	PPM1E	Protein phosphatase 1E	Q8WY54	135	13.028	13.1467	12.9672	12.8164	11.2363	12.946	12.1229	12.0186	NO	NO
20 uM Staurosporine vs. DMSO	GGMIVDPLR	0.161423	1.51537	PSMF1	Proteasome inhibitor PI31 subunit	Q92530	206	16.4379	16.4147	16.3088	16.3462	16.633	16.5525	16.451	16.5167	NO	NO
20 uM Staurosporine vs. DMSO	ANGMELDGR	0.351657	1.51292	TRA2B	Transformer-2 protein homolog beta	P62995	179	15.0101	14.7897	14.4605	14.892	15.1278	15.3276	15.0099	15.0935	NO	NO
20 uM Staurosporine vs. DMSO	LAITKEELYR	0.642329	1.51203	ARL5B	ADP-ribosylation factor-like protein 5B	Q96KC2	99	12.6777	12.0096	12.4595	12.6648	13.4679	13.1468	12.6802	13.0859	NO	NO
20 uM Staurosporine vs. DMSO	CYEMASHLRR	1.54115	1.51201	PFN1	Profilin-1	P07737	128	10.2051	10.449	12.5001	9.97102	13.0633	12.2876	12.1774	11.7616	NO	NO
20 uM Staurosporine vs. DMSO	SRDLEQQLQDELLEVVSELQTAKK	-1.26394	1.51171	ARHGAP4	Rho GTPase-activating protein 4	P98171	146	11.4657	10.5386	9.84987	10.6413	9.87147	8.81388	9.98303	8.77127	NO	NO
20 uM Staurosporine vs. DMSO	TTQLTQYLHEDGYTDYGMIGCTQPR	-0.269313	1.51141	DHX38	Pre-mRNA-splicing factor ATP-dependent RNA helicase PRP16	Q92620	562	15.2244	15.1089	14.8803	15.0636	14.8932	14.8495	14.6418	14.8154	NO	NO
20 uM Staurosporine vs. DMSO	ESPGALVETSAGEEAQGQEGPAAAQLDVLR	-0.517225	1.50995	RAB3IL1	Guanine nucleotide exchange factor for Rab-3A	Q8TBN0	34	13.5755	13.3056	13.0229	13.4696	12.5494	13.0752	12.949	12.7311	NO	NO
20 uM Staurosporine vs. DMSO	FDPSAVPLPDTDMDSLR	1.01475	1.50958	NSUN6	tRNA (cytosine(72)-C(5))-methyltransferase NSUN6	Q8TEA1	424	13.9568	12.6276	12.8037	12.3565	14.3005	14.2987	13.2317	13.9727	NO	NO
20 uM Staurosporine vs. DMSO	ADKEAAFDDAVEER	-0.221054	1.50943	RBBP4	Histone-binding protein RBBP4	Q09028	2	19.9342	19.8804	19.6682	20.0791	19.7127	19.5931	19.7322	19.6397	NO	NO
20 uM Staurosporine vs. DMSO	HRLVNACLAEELPHIHAFEQK	-0.366681	1.50934	BOLA2	BolA-like protein 2	Q9H3K6	53	16.226	15.7807	15.8533	15.9982	15.811	15.5292	15.7508	15.3006	NO	NO
20 uM Staurosporine vs. DMSO	NNLASCYLK	0.193763	1.50887	KLC4	Kinesin light chain 4	Q9NSK0	383	17.3945	17.2119	17.493	17.2535	17.4697	17.635	17.5256	17.4976	NO	NO
20 uM Staurosporine vs. DMSO	MTDQEAIQDLWQWR	0.315673	1.5088	NPM1	Nucleophosmin	P06748	278	22.2213	22.1904	22.4664	21.8467	22.5983	22.4169	22.5274	22.4449	NO	NO
20 uM Staurosporine vs. DMSO	TSISIPKPGQDGEIVITGQHR	-0.335885	1.50851	ASCC1	Activating signal cointegrator 1 complex subunit 1	Q8N9N2	118	14.872	14.6594	14.4233	14.6167	14.3933	14.4653	14.1467	14.2227	NO	NO
20 uM Staurosporine vs. DMSO	SMPPLDQPSCK	-1.01313	1.50829	SH3GL1	Endophilin-A2	Q99961	302	15.8908	15.739	15.4794	15.4408	15.8813	13.8735	14.4146	14.3281	NO	NO
20 uM Staurosporine vs. DMSO	DVTPVDFTPK	0.636917	1.50814	GPATCH1	G patch domain-containing protein 1	Q9BRR8	221	12.3013	12.5026	13.0337	12.9146	13.6433	13.1973	12.9442	13.515	NO	NO
20 uM Staurosporine vs. DMSO	IEDEECVR	0.366685	1.50751	CDC73	Parafibromin	Q6P1J9	140	14.8455	14.5059	14.3921	14.3374	15.1243	14.8431	14.7541	14.8261	NO	NO
20 uM Staurosporine vs. DMSO	HIQDAPEEFISELAEYLIKPLNK	2.08376	1.50674	UFL1	E3 UFM1-protein ligase 1	O94874	489	7.10335	9.87708	6.86641	9.77509	10.8882	10.7862	9.59826	10.6842	NO	NO
20 uM Staurosporine vs. DMSO	TGAESISLLELCR	-1.52894	1.50637	RAD21	Double-strand-break repair protein rad21 homolog	O60216	574	12.2418	12.1028	11.5375	12.4665	11.6565	9.96951	11.4553	9.15147	NO	NO
20 uM Staurosporine vs. DMSO	VVASVHASISGSSASSTSSTPEVKPLK	-0.36423	1.50608	AGFG1	Arf-GAP domain and FG repeat-containing protein 1	P52594	135	14.5889	14.2464	14.1324	14.529	13.9652	13.8701	14.1634	14.0411	NO	NO
20 uM Staurosporine vs. DMSO	DLGQIEENDLVR	0.173349	1.50466	DIP2B	Disco-interacting protein 2 homolog B	Q9P265	975	16.5936	16.5089	16.5947	16.5718	16.7413	16.5999	16.8678	16.7534	NO	NO
20 uM Staurosporine vs. DMSO	LLSEMLLHYSQEDSSDGDRELMK	-1.88179	1.50463	GGA3	ADP-ribosylation factor-binding protein GGA3	Q9NZ52	227	10.3432	9.51698	10.5652	9.00898	9.53031	8.37754	7.76161	6.2377	NO	NO
20 uM Staurosporine vs. DMSO	DVEVKESK	-2.141	1.5043	ERC1	ELKS/Rab6-interacting/CAST family member 1	Q8IUD2	171	13.097	13.2929	14.2235	14.5846	11.1166	12.4752	13.5443	9.49778	NO	NO
20 uM Staurosporine vs. DMSO	QVDVPTLTGAFGILAAHVPTLQVLRPGLVVVHAEDGTTSK	-0.69156	1.50366	ATP5F1D	ATP synthase subunit delta, mitochondrial	P30049	57	12.7874	12.2809	12.0296	12.2608	11.6476	11.2592	11.8309	11.8547	NO	NO
20 uM Staurosporine vs. DMSO	YGKDATNVGDEGGFAPNILENKEGLELLK	-0.855128	1.50353	ENO1	Alpha-enolase	P06733	200	13.8797	12.8355	12.5245	12.965	12.466	11.924	12.4995	11.8947	NO	NO
20 uM Staurosporine vs. DMSO	LSLDGQNIYNACCTLR	0.151441	1.50281	PTBP1	Polypyrimidine tract-binding protein 1	P26599	239	17.8436	17.7574	17.8148	17.8994	18.0353	17.8769	17.94	18.0688	NO	NO
20 uM Staurosporine vs. DMSO	NVDELSSLQSSADTSSSRPGSR	-0.631375	1.50202	ZNF592	Zinc finger protein 592	Q92610	920	13.2648	12.8301	12.6505	13.1783	12.6998	12.1942	12.5123	11.9918	NO	NO
20 uM Staurosporine vs. DMSO	LLGSGYGGLTGGSSR	0.188914	1.50161	CLASP1	CLIP-associating protein 1	Q7Z460	692	16.5991	16.7463	16.8822	16.7092	16.8525	16.8754	17.0125	16.9519	NO	NO
20 uM Staurosporine vs. DMSO	VQALSSASKFEAELKAEQDER	-0.482273	1.50046	EFHD1	EF-hand domain-containing protein D1	Q9BUP0	196	13.8077	13.4539	13.1977	13.6822	12.9743	12.9331	13.3064	12.9987	NO	NO
20 uM Staurosporine vs. DMSO	CNTNTAIELK	0.635351	1.50006	HAT1	Histone acetyltransferase type B catalytic subunit	O14929	27	12.5453	13.5137	13.4947	13.5121	13.7737	14.1438	13.8408	13.849	NO	NO
20 uM Staurosporine vs. DMSO	YFQTYFLTPSVK	0.142851	1.49982	GNL1	Guanine nucleotide-binding protein-like 1	P36915	397	17.4829	17.596	17.6387	17.5734	17.6466	17.807	17.7021	17.7067	NO	NO
20 uM Staurosporine vs. DMSO	LQGSSLSSESAR	0.52422	1.49981	APC	Adenomatous polyposis coli protein	P25054	1337	12.8031	13.2236	13.7174	13.2669	13.7661	13.7141	13.9214	13.7063	NO	NO
20 uM Staurosporine vs. DMSO	AKDDDDSDIPTAQR	-0.371231	1.49935	SPAG9	C-Jun-amino-terminal kinase-interacting protein 4	O60271	487	14.3862	14.5485	14.9206	14.7434	14.2952	14.4268	14.3227	14.069	NO	NO
20 uM Staurosporine vs. DMSO	HLQDLQDIFDPSR	0.614917	1.49909	RAPGEF6	Rap guanine nucleotide exchange factor 6	Q8TEU7	979	12.5353	12.6564	12.1258	12.4398	12.8374	13.1643	12.7143	13.5009	NO	NO
20 uM Staurosporine vs. DMSO	QIPPAVVKPLIVATEATSNVLGGMR	-1.07443	1.49896	ATG2B	Autophagy-related protein 2 homolog B	Q96BY7	2034	11.2241	11.5325	11.2094	10.1039	10.0463	10.2776	10.1139	9.33441	NO	NO
20 uM Staurosporine vs. DMSO	EFVGGNTPNVLTLVDNWYQVTQGIGR	1.51892	1.4982	APOL2	Apolipoprotein L2	Q9BQE5	197	9.3727	9.12336	10.4133	9.39192	10.4397	10.3377	10.9318	12.6677	NO	NO
20 uM Staurosporine vs. DMSO	SQDDAMVDYFFQR	0.274771	1.49817	PUM1	Pumilio homolog 1	Q14671	75	14.6068	14.7956	14.5604	14.3811	14.8633	14.8076	14.9351	14.8371	NO	NO
20 uM Staurosporine vs. DMSO	QAEPVVVLDPVSTHEPQTK	-0.212989	1.49809	SHTN1	Shootin-1	A0MZ66	575	16.7615	16.447	16.466	16.5866	16.2662	16.4161	16.3322	16.3946	NO	NO
20 uM Staurosporine vs. DMSO	IDFGTHISGR	0.680833	1.49776	METAP2	Methionine aminopeptidase 2	P50579	250	12.0919	11.3514	11.9137	12.1151	12.7017	12.8012	12.2304	12.4622	NO	NO
20 uM Staurosporine vs. DMSO	MILELFSK	0.343365	1.49775	GSTO1	Glutathione S-transferase omega-1	P78417	115	13.3368	13.5536	13.2914	13.3592	13.8179	13.6306	13.643	13.8229	NO	NO
20 uM Staurosporine vs. DMSO	TAPGALTAKPPLAPKPGTTVASGVTAR	-0.748264	1.49774	TBC1D10B	TBC1 domain family member 10B	Q4KMP7	160	14.8317	13.5712	13.7518	14.4654	13.2646	13.5384	13.6296	13.1944	NO	NO
20 uM Staurosporine vs. DMSO	AEEEDDDIK	-1.04523	1.49752	CHMP4C	Charged multivesicular body protein 4c	Q96CF2	218	10.1764	10.2784	10.9767	11.0653	9.28471	9.68172	10.2687	9.08073	NO	NO
20 uM Staurosporine vs. DMSO	KITGLCQEEHR	-0.692709	1.49717	MRPS18A	Large ribosomal subunit protein mL66	Q9NVS2	103	12.5819	12.7566	12.6019	12.6765	11.3247	12.2437	11.9369	12.3409	NO	NO
20 uM Staurosporine vs. DMSO	EISGLWNELDSLKDAVEHQR	-1.11958	1.49664	KTN1	Kinectin	Q86UP2	1007	11.8727	11.1221	10.4878	11.2704	9.88382	9.90769	10.9137	9.56961	NO	NO
20 uM Staurosporine vs. DMSO	TCFSPNR	0.20046	1.49582	EIF3F	Eukaryotic translation initiation factor 3 subunit F	O00303	255	17.6798	17.7479	17.8505	17.8191	17.825	18.1438	17.9034	18.027	NO	NO
20 uM Staurosporine vs. DMSO	LISKPVASDSTYFAWCPDGEHILTATCAPR	-0.877002	1.49478	EIF2A	Eukaryotic translation initiation factor 2A	Q9BY44	351	12.5765	11.8242	11.9079	12.2321	10.6595	11.0961	11.8957	11.3813	NO	NO
20 uM Staurosporine vs. DMSO	QEAGISEGQGTAGEEEEK	-0.402809	1.4947	DENR	Density-regulated protein	O43583	76	13.6741	13.4643	13.4521	13.2791	13.2546	12.9717	12.9893	13.0427	NO	NO
20 uM Staurosporine vs. DMSO	HAHEIMLK	1.08846	1.49443	STXBP5	Syntaxin-binding protein 5	Q5T5C0	1135	9.20639	9.10441	10.0884	9.00242	10.6084	10.7104	9.62437	10.8124	NO	NO
20 uM Staurosporine vs. DMSO	ICDEITGR	-1.92317	1.49438	GPD1L	Glycerol-3-phosphate dehydrogenase 1-like protein	Q8N335	103	13.7602	13.7402	13.966	14.0694	13.4469	12.1959	12.6675	9.53289	NO	NO
20 uM Staurosporine vs. DMSO	AAFLGCLTDVR	-0.405218	1.49368	VPS51	Vacuolar protein sorting-associated protein 51 homolog	Q9UID3	416	15.2956	15.381	15.1705	15.2445	15.3089	14.7042	14.5714	14.8862	NO	NO
20 uM Staurosporine vs. DMSO	SPFLQVFNNSPDESSYYR	0.654549	1.49307	SEC23B	Protein transport protein Sec23B	Q15437	589	12.0353	13.1184	12.8855	12.7153	13.1934	13.571	13.2928	13.3155	NO	NO
20 uM Staurosporine vs. DMSO	APVPEPGLDLSLSPRPDSPQPR	-0.237867	1.49267	PPP1R35	Protein phosphatase 1 regulatory subunit 35	Q8TAP8	35	16.6817	16.5637	16.2832	16.5931	16.1942	16.3563	16.2909	16.3288	NO	NO
20 uM Staurosporine vs. DMSO	GMMSTVTEVR	0.26889	1.49258	ECPAS	Proteasome adapter and scaffold protein ECM29	Q5VYK3	1262	14.6796	14.8986	15.078	14.7885	15.0525	15.1301	15.233	15.1046	NO	NO
20 uM Staurosporine vs. DMSO	IILEHVSTWR	1.71023	1.49245	COMMD9	COMM domain-containing protein 9	Q9P000	101	8.97318	8.87119	6.95986	8.7692	10.8416	10.9436	9.85759	8.7716	NO	NO
20 uM Staurosporine vs. DMSO	LQQQHSEQPPLQPSPVMTR	-0.881064	1.49209	TOR1AIP1	Torsin-1A-interacting protein 1	Q5JTV8	130	12.5739	11.7092	12.0435	11.9948	11.9392	11.0006	11.0686	10.7887	NO	NO
20 uM Staurosporine vs. DMSO	ATGPNLAR	0.242103	1.49169	PSTPIP2	Proline-serine-threonine phosphatase-interacting protein 2	Q9H939	300	15.7936	15.6216	15.8709	15.6404	16.0061	15.9289	15.8184	16.1414	NO	NO
20 uM Staurosporine vs. DMSO	ALNSYFEPPVEESALERRPETISEPK	-0.737735	1.49135	TDP2	Tyrosyl-DNA phosphodiesterase 2	O95551	57	14.6349	13.7119	13.6062	13.4434	12.8477	12.8852	13.437	13.2755	NO	NO
20 uM Staurosporine vs. DMSO	APQEVEEDDGRSGAGEDPPMPASR	-0.509048	1.49094	TACC3	Transforming acidic coiled-coil-containing protein 3	Q9Y6A5	377	14.345	13.912	13.5912	13.7451	13.6498	13.3421	13.4015	13.1637	NO	NO
20 uM Staurosporine vs. DMSO	KTRPSSTVIK	1.58989	1.49056	HP1BP3	Heterochromatin protein 1-binding protein 3	Q5SSJ5	508	16.0538	16.0601	13.3285	13.8858	16.3069	16.3932	16.5314	16.4563	NO	NO
20 uM Staurosporine vs. DMSO	GRPVPMMIPDELAPTYSLDTR	3.06523	1.49055	EML2	Echinoderm microtubule-associated protein-like 2	O95834	27	14.3631	10.947	14.8048	9.0784	15.1744	15.0512	15.6576	15.5711	NO	NO
20 uM Staurosporine vs. DMSO	HFVTISSPLATQIPQAVGAAYAAKR	-1.39817	1.49003	BCKDHA	2-oxoisovalerate dehydrogenase subunit alpha, mitochondrial	P12694	201	8.80783	10.9798	9.68984	10.8778	8.73297	8.83496	8.25771	8.93695	NO	NO
20 uM Staurosporine vs. DMSO	ARVALTGLTVAEYFR	1.04926	1.48951	ATP5F1B	ATP synthase subunit beta, mitochondrial	P06576	280	11.3629	10.2507	11.13	12.0142	12.3062	11.7077	12.4139	12.5271	NO	NO
20 uM Staurosporine vs. DMSO	ADEIDFTTGDAGASSTYPMQCSALR	-0.539725	1.4884	EIF5A2	Eukaryotic translation initiation factor 5A-2	Q9GZV4	2	17.0262	16.9595	16.3292	17.2167	16.3376	15.9651	16.419	16.651	NO	NO
20 uM Staurosporine vs. DMSO	DNNMAPYYEALCK	0.281294	1.48793	PSMD6	26S proteasome non-ATPase regulatory subunit 6	Q15008	47	14.5453	15.0149	14.7882	14.7152	15.0522	15.0933	15.0305	15.0128	NO	NO
20 uM Staurosporine vs. DMSO	LGLLTEQLQSLTLFLQTK	1.67368	1.48776	SPAG5	Sperm-associated antigen 5	Q96R06	874	8.2998	8.09686	7.10826	7.67103	10.5307	10.4287	7.90442	9.0068	NO	NO
20 uM Staurosporine vs. DMSO	MEHVQADHELFLQAFEKPTQIYR	-0.665344	1.48734	SUZ12	Polycomb protein SUZ12	Q15022	76	12.9448	13.2988	12.4332	13.4945	12.2785	12.2857	12.4294	12.5163	NO	NO
20 uM Staurosporine vs. DMSO	GVEPGPLGPEERPPPAADASEPR	-1.80919	1.4873	KMT2D	Histone-lysine N-methyltransferase 2D	O14686	3088	12.3645	10.8335	11.0542	13.208	11.2599	9.11794	10.6257	9.21993	NO	NO
20 uM Staurosporine vs. DMSO	KVESLWPIFR	0.154847	1.48709	BUD31	Protein BUD31 homolog	P41223	42	18.3223	18.2615	18.4514	18.2054	18.4913	18.5102	18.4161	18.4423	NO	NO
20 uM Staurosporine vs. DMSO	DLTTAGAVTQCYR	0.100551	1.4869	RPL18A	Large ribosomal subunit protein eL20	Q02543	99	21.622	21.6109	21.637	21.5727	21.6961	21.7277	21.7165	21.7045	NO	NO
20 uM Staurosporine vs. DMSO	ERAGGADAVQTVTGGLR	-1.2896	1.4869	EHD4	EH domain-containing protein 4	Q9H223	13	10.9005	11.8671	10.7044	11.6769	8.91429	10.8897	10.2947	9.89173	NO	NO
20 uM Staurosporine vs. DMSO	NFSNFCNVDVVEILPYLPCLTAR	-0.473463	1.48661	MAVS	Mitochondrial antiviral-signaling protein	Q7Z434	15	13.1365	13.0746	13.0493	13.2811	12.8191	12.4379	12.4813	12.9094	NO	NO
20 uM Staurosporine vs. DMSO	LGQERDPGGITAGSTDEPPMLTK	-0.894921	1.4865	BCL7C	B-cell CLL/lymphoma 7 protein family member C	Q8WUZ0	143	14.168	13.4601	13.4237	13.2472	13.4662	11.9249	12.6926	12.6357	NO	NO
20 uM Staurosporine vs. DMSO	IVFVTGNAK	0.306512	1.48647	ITPA	Inosine triphosphate pyrophosphatase	Q9BY32	10	15.1234	15.4995	15.4462	15.2183	15.3887	15.7116	15.6641	15.7489	NO	NO
20 uM Staurosporine vs. DMSO	SLKDMEESIR	0.118617	1.48621	PRKCSH	Glucosidase 2 subunit beta	P14314	383	18.6296	18.5801	18.6146	18.5109	18.6594	18.764	18.7165	18.6699	NO	NO
20 uM Staurosporine vs. DMSO	KLAASQIEK	0.704413	1.48619	SOX5	Transcription factor SOX-5	P35711	225	12.2366	13.0061	13.3333	13.2546	13.2667	13.8631	13.7964	13.7221	NO	NO
20 uM Staurosporine vs. DMSO	QDPLLGSSETFNSFLR	0.785445	1.48563	SNX17	Sorting nexin-17	Q15036	88	13.3768	14.2955	13.3458	12.686	14.3078	14.232	14.0374	14.2687	NO	NO
20 uM Staurosporine vs. DMSO	GIEILTDMSRPVELSDRETLLNSATTSLNSK	-0.556687	1.48555	CCT4	T-complex protein 1 subunit delta	P50991	144	15.4171	14.7881	14.3985	14.98	14.6543	14.2019	14.2211	14.2796	NO	NO
20 uM Staurosporine vs. DMSO	AQTVLNGNLK	-0.560014	1.48549	BLM	RecQ-like DNA helicase BLM	P54132	1177	13.3599	13.1228	13.0165	13.6088	13.0317	12.4356	12.5257	12.8749	NO	NO
20 uM Staurosporine vs. DMSO	AVAQRCPSPPMINLISVGGQHQGVFGLPR	-1.40234	1.48511	PPT1	Palmitoyl-protein thioesterase 1	P50897	123	11.9489	11.3983	11.2811	11.3769	11.341	9.23294	10.6909	9.13095	NO	NO
20 uM Staurosporine vs. DMSO	LADMALALESAR	0.758792	1.48466	ACADS	Short-chain specific acyl-CoA dehydrogenase, mitochondrial	P16219	314	12.7122	13.5628	12.1495	13.2426	13.6252	13.7063	13.7533	13.6175	NO	NO
20 uM Staurosporine vs. DMSO	AKLAEVLEAVMPHLDQTPNPLVSSVFHR	-1.47935	1.48462	UBE4A	Ubiquitin conjugation factor E4 A	Q14139	678	13.1799	10.5501	12.4988	12.7421	11.2251	11.0288	10.2713	10.5283	NO	NO
20 uM Staurosporine vs. DMSO	HLYLAEEER	0.238116	1.48442	CCDC59	Thyroid transcription factor 1-associated protein 26	Q9P031	95	15.8852	15.71	15.6695	15.5076	15.9753	15.9692	15.9781	15.802	NO	NO
20 uM Staurosporine vs. DMSO	LFQPNLNMDR	0.328531	1.48427	BCAT1	Branched-chain-amino-acid aminotransferase, cytosolic	P54687	110	13.9368	14.0481	14.2326	13.795	14.4742	14.2372	14.2736	14.3416	NO	NO
20 uM Staurosporine vs. DMSO	LAFDMATNAACASLLK	0.400344	1.48424	OSTF1	Osteoclast-stimulating factor 1	Q92882	175	14.2696	14.4149	13.876	14.3375	14.3787	14.8481	14.5847	14.6878	NO	NO
20 uM Staurosporine vs. DMSO	HAEMVHTGLK	0.35012	1.4842	CAP1	Adenylyl cyclase-associated protein 1	Q01518	72	12.9795	13.0035	13.0898	13.0634	13.4073	13.3485	13.3073	13.4734	NO	NO
20 uM Staurosporine vs. DMSO	KLDPDSIPSPIQVIENDR	-0.829135	1.48414	SEC24D	Protein transport protein Sec24D	O94855	258	11.4053	11.2833	11.7323	11.707	10.1234	10.6136	10.8543	11.2201	NO	NO
20 uM Staurosporine vs. DMSO	GTEAGQVGEPGIPTGEAGPSCSSASDKLPR	-0.435894	1.48346	PPM1G	Protein phosphatase 1G	O15355	221	18.6509	18.1736	17.8216	17.8942	17.7153	17.5638	17.7797	17.7378	NO	NO
20 uM Staurosporine vs. DMSO	MSNWVGILSHGLR	1.07104	1.48293	PARP2	Poly [ADP-ribose] polymerase 2	Q9UGN5	432	11.6189	13.8403	12.8803	12.7895	14.0854	13.8757	13.8412	13.6109	NO	NO
20 uM Staurosporine vs. DMSO	KGVAASLLAPLLPEGIKEEEER	-0.902163	1.4829	FNBP4	Formin-binding protein 4	Q8N3X1	319	14.4378	13.565	13.6654	13.9121	12.4147	12.4476	13.7436	13.3658	NO	NO
20 uM Staurosporine vs. DMSO	NLALCPANHAPLQEAAVIPR	-0.564922	1.48265	JUP	Junction plakoglobin	P14923	507	12.8312	13.0217	12.7543	12.9365	12.0188	12.7715	12.3244	12.1694	NO	NO
20 uM Staurosporine vs. DMSO	CDFTEDQTAEFK	0.283534	1.48245	MYL6	Myosin light polypeptide 6	P60660	2	14.5035	14.6453	14.9715	14.6499	14.9773	14.966	14.9735	14.9876	NO	NO
20 uM Staurosporine vs. DMSO	LFSEIQTTLGTFGLNGLDR	-1.05637	1.48243	WASHC5	WASH complex subunit 5	Q12768	860	10.7784	10.8804	9.89643	10.9824	9.86929	9.48441	8.88529	10.0733	NO	NO
20 uM Staurosporine vs. DMSO	MSHHVWTAQNVDPASFLSTTLGNVLVTVK	-1.04452	1.48209	EXOC1	Exocyst complex component 1	Q9NV70	616	10.5033	9.43364	9.58386	9.46783	9.23267	8.8385	8.55101	8.18839	NO	NO
20 uM Staurosporine vs. DMSO	LKPDPEPDDKNQEPSSCK	-0.602567	1.48184	PSME3IP1	PSME3-interacting protein	Q9GZU8	171	13.6309	12.9058	12.848	12.8303	12.5937	12.2492	12.4578	12.504	NO	NO
20 uM Staurosporine vs. DMSO	LCSLFYTNEEVAK	0.166355	1.48131	MATR3	Matrin-3	P43243	805	15.6252	15.6248	15.6829	15.7521	15.8182	15.7634	15.8866	15.8823	NO	NO
20 uM Staurosporine vs. DMSO	RIEQAGR	1.48261	1.48104	WDR7	WD repeat-containing protein 7	Q9Y4E6	1037	10.354	8.86608	9.49641	10.5824	12.1682	11.7736	10.0667	11.2208	NO	NO
20 uM Staurosporine vs. DMSO	LVGFISAIPANIR	-1.59529	1.48015	NMT2	Glycylpeptide N-tetradecanoyltransferase 2	O60551	224	9.55688	11.605	11.1586	11.2327	10.2579	8.2231	8.80827	9.88274	NO	NO
20 uM Staurosporine vs. DMSO	SYLEREDFFFYSLVYDPQQK	-1.14918	1.47967	MTA1	Metastasis-associated protein MTA1	Q13330	139	10.7782	10.7421	10.6673	10.9565	9.83129	8.85306	10.7187	9.14429	NO	NO
20 uM Staurosporine vs. DMSO	SMTAFRGDGK	2.79042	1.47883	CMSS1	Protein CMSS1	Q9BQ75	174	5.81591	9.40121	10.3852	9.29922	9.55314	12.9808	12.017	11.5122	NO	NO
20 uM Staurosporine vs. DMSO	EIEELKQELIQAEIQNGVK	-0.276116	1.47819	AIMP1	Aminoacyl tRNA synthase complex-interacting multifunctional protein 1	Q12904	58	16.0775	15.7932	15.6015	15.9074	15.464	15.5374	15.6543	15.6195	NO	NO
20 uM Staurosporine vs. DMSO	SKQLDAGLAR	-1.47594	1.47766	MACIR	Macrophage immunometabolism regulator	Q96GV9	93	10.8128	10.7108	12.112	10.6088	9.00199	9.10397	11.0287	9.20596	NO	NO
20 uM Staurosporine vs. DMSO	FAEMLYYKVLESVIEQEQK	-1.59356	1.47756	RBL2	Retinoblastoma-like protein 2	Q08999	494	12.4818	10.4421	12.4718	11.9153	11.023	9.37271	11.0663	9.4747	NO	NO
20 uM Staurosporine vs. DMSO	TVTAMDVVYALK	0.186472	1.47736	H4C1	Histone H4	P62805	81	16.6625	16.8506	16.8047	16.6225	16.9605	16.9428	16.7987	16.9843	NO	NO
20 uM Staurosporine vs. DMSO	SANEDQEMELEALR	1.29787	1.47735	RWDD4	RWD domain-containing protein 4	Q6NW29	2	9.81296	10.2563	10.7289	9.64293	11.8342	11.3494	12.2772	10.1718	NO	NO
20 uM Staurosporine vs. DMSO	LYQQHGAGLFDVTR	-0.109774	1.47635	TPP1	Tripeptidyl-peptidase 1	O14773	507	17.4828	17.4315	17.5299	17.5037	17.3838	17.3672	17.3728	17.385	NO	NO
20 uM Staurosporine vs. DMSO	LQQTQAQVDEVVDIMR	-0.326345	1.47619	VAMP2	Vesicle-associated membrane protein 2	P63027	32	15.0261	15.0704	14.9832	14.8641	14.3922	14.646	14.9572	14.643	NO	NO
20 uM Staurosporine vs. DMSO	LLGSMPENAQIDDDVFDKINK	-0.354712	1.47583	NCAPG	Condensin complex subunit 3	Q9BPX3	125	15.3827	15.053	14.7473	15.0119	14.553	14.6827	14.7704	14.7699	NO	NO
20 uM Staurosporine vs. DMSO	NIVFQSAVPK	2.04517	1.47576	GGA1	ADP-ribosylation factor-binding protein GGA1	Q9UJY5	557	10.8272	11.6117	8.85389	9.96914	13.2678	11.834	10.7092	13.6317	NO	NO
20 uM Staurosporine vs. DMSO	SGDRSMVEVLADHPGELVRTDSPNFLCSVLPTHWR	-1.57293	1.47574	RUNX1	Runt-related transcription factor 1	Q01196	46	14.6739	14.2731	14.9775	12.3674	12.1797	11.8609	13.6287	12.3309	NO	NO
20 uM Staurosporine vs. DMSO	GVSEKYR	1.48595	1.47525	VPS45	Vacuolar protein sorting-associated protein 45	Q9NRW7	414	13.233	10.5986	11.3895	13.0954	13.82	13.3029	13.5336	13.6038	NO	NO
20 uM Staurosporine vs. DMSO	NPYKEVYTDMWVEPEAAAYAPPPPAK	-1.726	1.4748	DNMT3A	DNA (cytosine-5)-methyltransferase 3A	Q9Y6K1	430	11.5921	12.563	12.22	11.9329	11.1247	11.951	8.94071	9.38753	NO	NO
20 uM Staurosporine vs. DMSO	IKFDAGTLLLSTHR	-1.24515	1.47471	VPS36	Vacuolar protein-sorting-associated protein 36	Q86VN1	33	14.1802	13.9816	14.0329	15.2127	13.9072	13.1519	13.605	11.7627	NO	NO
20 uM Staurosporine vs. DMSO	TNLDESDVQPVKEQLAQAMFDHIPVGVGSK	-0.681842	1.4746	RTCB	RNA-splicing ligase RtcB homolog	Q9Y3I0	129	13.8995	13.523	13.4857	13.5997	12.1815	13.2487	13.2648	13.0855	NO	NO
20 uM Staurosporine vs. DMSO	VLVPGIPGHHAAIKPAPPQTEQVESK	-0.535575	1.47404	WDR43	WD repeat-containing protein 43	Q15061	403	13.7314	13.425	12.9279	13.5218	12.7056	12.7543	13.0081	12.9959	NO	NO
20 uM Staurosporine vs. DMSO	KALDSNSLENDDLSAPGREPGHFNPESR	-0.498426	1.47377	LRRFIP1	Leucine-rich repeat flightless-interacting protein 1	Q32MZ4	762	14.9352	14.3978	14.1147	14.774	14.1626	14.0831	14.1826	13.7997	NO	NO
20 uM Staurosporine vs. DMSO	AEIRYEGILYTIDTENSTVALAK	-0.214551	1.47357	LSM14A	Protein LSM14 homolog A	Q8ND56	18	15.3588	15.3948	15.2511	15.3545	15.0515	15.0425	15.2926	15.1144	NO	NO
20 uM Staurosporine vs. DMSO	GNINNYFK	1.17793	1.47349	BPTF	Nucleosome-remodeling factor subunit BPTF	Q12830	834	10.7852	12.0858	9.89422	11.2661	12.3879	11.8435	12.1141	12.3976	NO	NO
20 uM Staurosporine vs. DMSO	LNNLICDESDVKDLAFK	-1.04351	1.47344	ELP4	Elongator complex protein 4	Q96EB1	356	12.1554	12.612	12.1492	13.3622	11.2595	12.0842	11.9826	10.7784	NO	NO
20 uM Staurosporine vs. DMSO	LICVATVTR	2.05131	1.47294	MBTD1	MBT domain-containing protein 1	Q05BQ5	508	11.2964	8.73782	12.7005	12.4475	13.5801	12.9533	13.4698	13.3842	NO	NO
20 uM Staurosporine vs. DMSO	MQTPVNIPVPVLR	0.314621	1.47271	GEMIN7	Gem-associated protein 7	Q9H840	1	15.572	15.888	16.0323	15.7173	15.9743	16.2808	15.9684	16.2446	NO	NO
20 uM Staurosporine vs. DMSO	GSISSGLEFVSHNPPSEAATPPVAR	-0.248677	1.47264	ATXN2	Ataxin-2	Q99700	641	15.4032	15.2123	15.1872	15.4744	14.9795	15.1137	14.9972	15.1921	NO	NO
20 uM Staurosporine vs. DMSO	EVIKPYDWTYTTDYKGTLLGESLK	-0.198663	1.47221	TIPRL	TIP41-like protein	O75663	103	15.8618	15.6376	15.6167	15.6053	15.4757	15.4918	15.5148	15.4444	NO	NO
20 uM Staurosporine vs. DMSO	FVSENKNLPIENTTDCLSTMASVCR	-0.286106	1.47192	CYRIB	CYFIP-related Rac1 interactor B	Q9NUQ9	208	15.634	15.5167	15.2864	15.2065	15.0221	15.0729	15.1894	15.2146	NO	NO
20 uM Staurosporine vs. DMSO	SFVFILEPK	0.231985	1.47169	PLCG2	1-phosphatidylinositol 4,5-bisphosphate phosphodiesterase gamma-2	P16885	871	14.8786	14.9507	15.0948	14.9682	15.0579	15.3125	15.1632	15.2866	NO	NO
20 uM Staurosporine vs. DMSO	NILDSKPTANKKCDLISIPK	-0.339056	1.47151	CORO1C	Coronin-1C	Q9ULV4	408	15.7363	15.3299	15.0907	15.3912	15.0124	15.0157	15.1436	15.0201	NO	NO
20 uM Staurosporine vs. DMSO	QDGSTIHIR	1.52761	1.47144	MRPL55	Large ribosomal subunit protein mL55	Q7Z7F7	59	10.9602	8.78822	10.0782	10.9034	11.8729	12.3044	12.0922	10.5709	NO	NO
20 uM Staurosporine vs. DMSO	DKLDTVVEFPIR	-0.319043	1.47131	USP4	Ubiquitin carboxyl-terminal hydrolase 4	Q13107	836	14.1342	14.1115	14.1681	14.4721	13.804	13.8576	14.0241	13.9243	NO	NO
20 uM Staurosporine vs. DMSO	SPLGEVAIRDIVQFVPFR	-0.686096	1.47118	CPNE3	Copine-3	O75131	476	11.5506	11.5699	11.3453	11.4362	11.1883	10.7642	10.5565	10.6486	NO	NO
20 uM Staurosporine vs. DMSO	HLPEKQNGLSAVR	-1.99163	1.47116	BAP1	Ubiquitin carboxyl-terminal hydrolase BAP1	Q92560	151	10.3252	10.4272	13.6283	10.5292	9.13587	8.75583	10.1199	8.93189	NO	NO
20 uM Staurosporine vs. DMSO	EVCPVLDQFLCHVAK	1.04385	1.47064	PPP4R2	Serine/threonine-protein phosphatase 4 regulatory subunit 2	Q9NY27	20	13.5545	11.6828	12.013	12.2906	12.9888	13.5083	13.3605	13.8587	NO	NO
20 uM Staurosporine vs. DMSO	VKIPSNPLEADILAMAEMIAEAEELDK	2.48439	1.47052	ZMYM3	Zinc finger MYM-type protein 3	Q14202	921	8.84053	8.73854	9.72254	8.72928	9.74968	9.64769	12.6377	13.9333	NO	NO
20 uM Staurosporine vs. DMSO	SQAEFEKAAEEVR	-0.595514	1.46931	DBI	Acyl-CoA-binding protein	P07108	2	13.9324	13.2582	13.1407	13.1668	12.7139	12.4992	12.849	13.0539	NO	NO
20 uM Staurosporine vs. DMSO	YVPVSCEK	1.52986	1.46913	KIFC1	Kinesin-like protein KIFC1	Q9BW19	504	11.0204	13.3499	11.5202	13.6857	13.9245	14.3015	14.0332	13.4364	NO	NO
20 uM Staurosporine vs. DMSO	IAAAILNTPDLR	0.290024	1.46903	GOT2	Aspartate aminotransferase, mitochondrial	P00505	326	14.2764	14.421	14.4516	14.1688	14.7536	14.4906	14.7178	14.5159	NO	NO
20 uM Staurosporine vs. DMSO	SVGAPGGAPTPALGPSAPQKPLR	1.29472	1.46901	NHSL3	NHS-like protein 3	Q9P206	832	9.78221	8.3861	7.99126	9.28534	10.3255	10.4274	9.34145	10.5294	NO	NO
20 uM Staurosporine vs. DMSO	DSAQCAAIAER	0.385276	1.46869	NUDCD1	NudC domain-containing protein 1	Q96RS6	372	14.6402	14.777	14.9371	14.2886	14.8885	15.0545	14.9993	15.2417	NO	NO
20 uM Staurosporine vs. DMSO	IVSVHLQDSTLK	-0.410209	1.46867	HLCS	Biotin--protein ligase	P50747	16	14.6128	14.6802	15.0181	14.9688	14.7451	14.4843	14.1595	14.2501	NO	NO
20 uM Staurosporine vs. DMSO	IVVQPETQHR	0.310511	1.46852	NFAT5	Nuclear factor of activated T-cells 5	O94916	284	14.0236	13.8509	13.959	13.6266	14.1369	14.1874	14.219	14.1587	NO	NO
20 uM Staurosporine vs. DMSO	KGTHFVQLCCQR	-0.403369	1.4683	MCCC2	Methylcrotonoyl-CoA carboxylase beta chain, mitochondrial	Q9HCC0	383	13.3625	13.1789	13.238	13.0078	12.8667	12.7691	12.7012	12.8368	NO	NO
20 uM Staurosporine vs. DMSO	SEEVAVLK	1.07186	1.46757	CCNH	Cyclin-H	P51946	267	9.21469	9.1127	10.0967	9.01072	10.6001	10.7021	9.61607	10.8041	NO	NO
20 uM Staurosporine vs. DMSO	LAPAQYIR	0.256103	1.46747	SNW1	SNW domain-containing protein 1	Q13573	171	18.0842	18.2223	18.3932	17.9618	18.246	18.5074	18.476	18.4564	NO	NO
20 uM Staurosporine vs. DMSO	SVSQETFR	0.347015	1.46645	CBLL1	E3 ubiquitin-protein ligase Hakai	Q75N03	276	15.1741	15.2604	15.4252	15.2483	15.3202	15.4774	15.8584	15.84	NO	NO
20 uM Staurosporine vs. DMSO	KQFYSVDR	1.729	1.46602	PLCG1	1-phosphatidylinositol 4,5-bisphosphate phosphodiesterase gamma-1	P19174	159	11.6063	9.6232	10.6072	13.1193	13.2144	12.6313	13.2714	12.7549	NO	NO
[truncated: 3,947 more rows]
