# Supplementary material for: A Two-Dimensional Peptide-Centric Stability Assay Maps Multidimensional Target Landscapes Unveiling 17β-Estradiol (E2)-GPX4 Binding-Induced Ferroptosis
Source: Research Square preprint supplement (doi:10.21203/rs.3.rs-6893001/v1), 2025-07-04
Supplement: Supplementary file 7 [file 556ec63ca96808e4f56d05b2.xlsx]

## Sheet: parameter description
Supplementary Table 1
This file summarizes peptide-level Bayes t-test and the parameters of the dose-response curves fitted by the peptides quantified in 2D-PELSA staurosporine (STU) analysis
Tab descriptions
A	Bayes t-test result	Summary of peptide-level bayes t-test result to increasing STU concentrations as measured by 2D-PELSA in K562 cell lysates
B	dose-response curves	Summary of peptide-level binding affinities to STU as measured by 2D-PELSA in K562 cell lysates
Column descriptions
	Sequence	Amino acid sequence of the detected peptide
	Sequence start position	The N-terminal position of the peptide on the protein sequence
	Gene names	Gene names of the corresponding protein
	Protein names	Common names of the corresponding protein
	Uniprot entry	Uniprot entry of the corresponding protein
	IsKinase	yes/no Uniprot.ID mapped to kinase @ http://kinhub.org/kinases.html or https://www.uniprot.org/ identifed as part of human, reviewed kinase family
	Log2FC	Log2 intensity fold change of the proxy peptide that was used to represent its parent protein (moderated empirical Bayes t-test)
	-Log10P.Value	-Log10 P.Value of the proxy peptide that was used to represent its parent protein (moderated empirical Bayes t-test)
	Ratio_ STU treatment vs Vehicle	Relative averaged peptide intensity under ligand treatment to that under vehicle treatment
	EC50	The EC50 values calculated by fitting peptide's Ratio_E2 vs Vehicle and ligand concentrations to a four-parameter log-logistic model.
	R2	The pearson correlation to a sigmoid trend of the ligand dose-response profile
	Lower	The bottom plateaus of the dose-response curve
	Upper	The top plateaus of the dose-response curve

## Sheet: A Bayes T-test
Gene names	Protein names	Uniprot entry	IsKinase		Sequence	Sequence start position	STU_020 nM		STU_200 nM		STU_002 mM		STU_020 mM		STU_100 mM
			KinHub	Uniprot			Log2FC	-Log10P.Value	Log2FC	-Log10P.Value	Log2FC	-Log10P.Value	Log2FC	-Log10P.Value	Log2FC	-Log10P.Value
CDC7	Cell division cycle 7-related protein kinase	O00311	YES	YES	VMNSAVMR	332	0.857327	0.626162	0.424514	0.269281	1.05149	0.873649	0.486557	0.220786	0.0931464	0.424514
CDC7	Cell division cycle 7-related protein kinase	O00311	YES	YES	NDHVVIAMPYLEHESFLDILNSLSFQEVR	127	-0.449501	0.432887	0.473794	0.436498	-0.411187	0.356219	-0.716897	0.171365	0.160445	0.473794
CDC7	Cell division cycle 7-related protein kinase	O00311	YES	YES	RPYTNAQIQIK	258	-0.702365	0.382836	0.507905	0.266645	0.838871	0.534678	0.832178	0.550467	0.401773	0.507905
CDC7	Cell division cycle 7-related protein kinase	O00311	YES	YES	LYEAVPQLSNVFK	47	-0.716221	0.276517	-1.48714	0.863966	-1.96839	1.18547	-1.71964	1.05241	1.20379	-1.48714
CDC7	Cell division cycle 7-related protein kinase	O00311	YES	YES	FVQSEAQQER	213	-0.224787	0.243521	-0.424129	0.75774	-0.433754	0.944097	-0.295909	0.669707	0.667609	-0.424129
CDC7	Cell division cycle 7-related protein kinase	O00311	YES	YES	ITAEEALLHPFFK	558	0.25463	0.145075	0.311914	0.253391	-0.481677	0.368108	-0.610405	0.775562	1.22808	0.311914
CDC7	Cell division cycle 7-related protein kinase	O00311	YES	YES	KNDHVVIAMPYLEHESFLDILNSLSFQEVR	126	-0.257344	0.103548	-0.485698	0.165468	-0.88203	0.329182	0.351493	0.156745	0.00495816	-0.485698
PIK3CD	Phosphatidylinositol 4,5-bisphosphate 3-kinase catalytic subunit delta isoform	O00329	NO	YES	RLCDVQPFLPVLR	88	-0.669176	0.77563	-0.624012	0.840533	-0.141012	0.175069	-1.10792	1.6661	1.53404	-0.624012
PIK3CD	Phosphatidylinositol 4,5-bisphosphate 3-kinase catalytic subunit delta isoform	O00329	NO	YES	VNWLAHNVSK	1031	0.880545	0.770073	1.38474	1.3772	1.39887	1.21641	1.44281	1.84623	1.2225	1.38474
PIK3CD	Phosphatidylinositol 4,5-bisphosphate 3-kinase catalytic subunit delta isoform	O00329	NO	YES	TEEEALKHFR	1007	-0.718168	0.699272	0.0523007	0.0269718	-0.223331	0.139345	-0.345705	0.180988	0.0460626	0.0523007
PIK3CD	Phosphatidylinositol 4,5-bisphosphate 3-kinase catalytic subunit delta isoform	O00329	NO	YES	QPLVEQPEDYTLQVNGR	230	0.974111	0.527128	1.08072	0.585092	1.23916	0.688465	0.089153	0.0358303	0.701587	1.08072
PIK3CD	Phosphatidylinositol 4,5-bisphosphate 3-kinase catalytic subunit delta isoform	O00329	NO	YES	FEGSEESFTFQVSTK	196	-0.344096	0.357287	-0.276896	0.260108	-0.866401	0.726909	-0.274978	0.182305	0.0377736	-0.276896
PIK3CD	Phosphatidylinositol 4,5-bisphosphate 3-kinase catalytic subunit delta isoform	O00329	NO	YES	DVPLALMACALRK	211	-0.250728	0.332039	-0.332432	0.476983	-0.0207078	0.0243706	0.0621954	0.0770354	0.102517	-0.332432
PIK3CD	Phosphatidylinositol 4,5-bisphosphate 3-kinase catalytic subunit delta isoform	O00329	NO	YES	DVPLALMACALR	211	0.0851988	0.289021	-0.204841	0.500013	0.167681	0.764173	0.227077	1.03667	0.679327	-0.204841
PIK3CD	Phosphatidylinositol 4,5-bisphosphate 3-kinase catalytic subunit delta isoform	O00329	NO	YES	SKNPGEALDR	861	0.201678	0.280038	-1.10707	1.73503	-0.155166	0.19601	-0.527125	0.629735	1.59451	-1.10707
PIK3CD	Phosphatidylinositol 4,5-bisphosphate 3-kinase catalytic subunit delta isoform	O00329	NO	YES	DEQSNPAPQVQKPR	287	0.475537	0.25513	-0.275171	0.101193	-0.112199	0.0419333	0.488596	0.229553	0.134225	-0.275171
PIK3CD	Phosphatidylinositol 4,5-bisphosphate 3-kinase catalytic subunit delta isoform	O00329	NO	YES	GLHEFDSLCDPEVNDFR	124	0.188408	0.111218	0.0130111	0.00786034	-0.537259	0.405889	-0.0129201	0.00654165	0.334182	0.0130111
EEF2K	Eukaryotic elongation factor 2 kinase	O00418	YES	YES	HMPDPWAEFHLEDIATER	94	-1.05397	1.45014	-0.243168	0.205544	-0.397175	0.668683	-0.921418	1.39799	0.611538	-0.243168
EEF2K	Eukaryotic elongation factor 2 kinase	O00418	YES	YES	VHLAMVR	526	0.315994	1.32989	0.23204	1.61969	0.348005	1.98921	0.175991	0.862072	1.31208	0.23204
EEF2K	Eukaryotic elongation factor 2 kinase	O00418	YES	YES	GASNYVAKR	163	-0.997499	0.981804	-0.313974	0.211911	-0.195968	0.126598	0.12233	0.0788262	0.0423449	-0.313974
EEF2K	Eukaryotic elongation factor 2 kinase	O00418	YES	YES	YYSNLTK	59	-1.19916	0.955759	-0.0662182	0.109863	-0.288082	0.519865	-0.236734	0.226482	0.113456	-0.0662182
EEF2K	Eukaryotic elongation factor 2 kinase	O00418	YES	YES	ADEDLIFR	2	0.248137	0.90169	0.217715	0.577888	0.28831	1.23219	0.243765	0.939839	0.434247	0.217715
EEF2K	Eukaryotic elongation factor 2 kinase	O00418	YES	YES	SGDLYTQAAEAAMEAMK	689	0.603235	0.898427	0.354357	0.442506	0.0244839	0.0191419	-0.126199	0.0908843	0.164626	0.354357
EEF2K	Eukaryotic elongation factor 2 kinase	O00418	YES	YES	ICESMGLAPFDLSPR	317	0.171963	0.720687	-0.0323319	0.0882432	0.132273	0.60238	0.154032	0.689698	0.487686	-0.0323319
EEF2K	Eukaryotic elongation factor 2 kinase	O00418	YES	YES	LANQYYQK	708	-0.415671	0.618057	-0.172815	0.364157	-0.69833	1.42074	-0.00844538	0.0152762	0.00172455	-0.172815
EEF2K	Eukaryotic elongation factor 2 kinase	O00418	YES	YES	AFDSGQNLSPDR	619	0.154147	0.550436	0.0312924	0.0811198	0.0124369	0.0337182	0.106768	0.376465	0.118707	0.0312924
EEF2K	Eukaryotic elongation factor 2 kinase	O00418	YES	YES	HRYNAVTGEWLDDEVLIK	115	-0.597938	0.529428	-0.987753	1.17195	-0.531715	0.570046	-0.175551	0.117324	0.530538	-0.987753
EEF2K	Eukaryotic elongation factor 2 kinase	O00418	YES	YES	LWGEEYNR	193	-0.839447	0.395449	0.371084	0.711489	-0.0502435	0.052506	-0.211658	0.20305	0.176212	0.371084
EEF2K	Eukaryotic elongation factor 2 kinase	O00418	YES	YES	QVDIMQMCIIELK	206	-0.328522	0.379725	-0.235118	0.26858	0.0802766	0.0958801	-0.0232365	0.0245093	0.705016	-0.235118
EEF2K	Eukaryotic elongation factor 2 kinase	O00418	YES	YES	VCVEKWNLLNSSR	481	0.406152	0.370602	0.59303	0.623234	0.63332	0.665272	0.453837	0.449755	0.759665	0.59303
EEF2K	Eukaryotic elongation factor 2 kinase	O00418	YES	YES	YNSNSGFVRDDNIR	239	-0.436806	0.346826	-0.37188	0.484711	-0.302994	0.396831	-0.714131	1.1287	0.336514	-0.37188
EEF2K	Eukaryotic elongation factor 2 kinase	O00418	YES	YES	MASQPFGR	133	0.235084	0.34126	-0.182789	0.229704	-0.0204796	0.0195846	0.113461	0.139973	0.0285873	-0.182789
EEF2K	Eukaryotic elongation factor 2 kinase	O00418	YES	YES	RGELDDPEPR	448	-0.140152	0.275423	-0.0639704	0.194347	0.023928	0.0728946	-0.0219709	0.0591573	0.473258	-0.0639704
EEF2K	Eukaryotic elongation factor 2 kinase	O00418	YES	YES	LTPQAFSHFTFER	253	0.0592561	0.246045	0.115446	0.567247	0.11479	0.625142	0.123331	0.595981	0.392957	0.115446
EEF2K	Eukaryotic elongation factor 2 kinase	O00418	YES	YES	KYESDEDSLGSSGR	467	0.237117	0.245815	-0.876745	0.903473	-1.00224	0.608313	-0.339956	0.230294	0.346383	-0.876745
EEF2K	Eukaryotic elongation factor 2 kinase	O00418	YES	YES	QSMILVAR	611	0.0697718	0.224887	-0.00219179	0.00580804	0.116265	0.596342	0.160506	0.730314	0.539886	-0.00219179
EEF2K	Eukaryotic elongation factor 2 kinase	O00418	YES	YES	YIEPVDR	172	-0.62528	0.195573	0.182602	0.0526242	0.795481	0.380274	0.131249	0.0321749	0.480633	0.182602
EEF2K	Eukaryotic elongation factor 2 kinase	O00418	YES	YES	ADEDLIFRLEGVDGGQSPR	2	-0.0863416	0.17977	-0.144638	0.289694	-0.288913	0.489045	-0.411113	1.21392	0.535157	-0.144638
EEF2K	Eukaryotic elongation factor 2 kinase	O00418	YES	YES	EAEMLFTGGYGLEKDPQR	671	-0.0581054	0.16323	-0.0630868	0.140866	0.0808632	0.353223	-0.00344028	0.0123215	0.0996826	-0.0630868
EEF2K	Eukaryotic elongation factor 2 kinase	O00418	YES	YES	LDHLHWPVFSDLDNMASR	407	-0.195798	0.120814	-0.0847211	0.0433132	-0.265621	0.165534	0.0346484	0.0230902	0.906418	-0.0847211
EEF2K	Eukaryotic elongation factor 2 kinase	O00418	YES	YES	LNALDLEK	509	-0.0470368	0.0889504	-0.0646625	0.146688	-0.26104	0.548762	-0.00874427	0.0158368	0.129603	-0.0646625
EEF2K	Eukaryotic elongation factor 2 kinase	O00418	YES	YES	GMALFFYSHACNRICESMGLAPFDLSPR	304	0.125532	0.0795161	0.953779	0.888604	0.499918	0.51514	0.153611	0.117327	0.836306	0.953779
EEF2K	Eukaryotic elongation factor 2 kinase	O00418	YES	YES	ASAVALEVQR	499	-0.0186543	0.0730025	0.135855	0.794613	0.15246	0.798159	-0.0254057	0.100404	0.454217	0.135855
EEF2K	Eukaryotic elongation factor 2 kinase	O00418	YES	YES	YNSNSGFVR	239	0.0496624	0.0667431	-0.432356	0.739003	-0.0796824	0.12415	0.083474	0.154843	0.572556	-0.432356
EEF2K	Eukaryotic elongation factor 2 kinase	O00418	YES	YES	YIEPVDRDVYFEDVR	172	0.0431873	0.0528737	-1.27195	0.715024	-0.935677	0.586118	-0.998456	0.60828	0.686258	-1.27195
EEF2K	Eukaryotic elongation factor 2 kinase	O00418	YES	YES	GMALFFYSHACNR	304	-0.0313504	0.0398741	0.170025	0.387073	0.233248	0.459979	0.164621	0.257326	0.646209	0.170025
EEF2K	Eukaryotic elongation factor 2 kinase	O00418	YES	YES	LEGVDGGQSPR	10	-0.0797703	0.0290031	1.69555	1.11013	2.44871	2.34213	2.19084	2.02979	1.06384	1.69555
EEF2K	Eukaryotic elongation factor 2 kinase	O00418	YES	YES	YSSSGSPANSFHFK	69	0.00550917	0.0108906	-0.050985	0.107898	0.011729	0.0271476	-0.022117	0.0563842	0.104675	-0.050985
PIK3C2A	Phosphatidylinositol 4-phosphate 3-kinase C2 domain-containing subunit alpha	O00443	NO	YES	LLLDDSFETK	103	0.838569	1.58549	0.568093	0.806941	0.59744	0.723736	0.10986	0.107599	1.36472	0.568093
PIK3C2A	Phosphatidylinositol 4-phosphate 3-kinase C2 domain-containing subunit alpha	O00443	NO	YES	AQISSNSGFKECPSSHPEPTR	2	-0.463449	0.955686	-0.0872789	0.107755	-0.39826	0.571542	-0.347226	0.63465	0.728542	-0.0872789
PIK3C2A	Phosphatidylinositol 4-phosphate 3-kinase C2 domain-containing subunit alpha	O00443	NO	YES	DPWDAVLLEER	302	-1.14351	0.882699	-0.486739	0.328054	-0.409104	0.23429	0.0265647	0.0126389	0.309885	-0.486739
PIK3C2A	Phosphatidylinositol 4-phosphate 3-kinase C2 domain-containing subunit alpha	O00443	NO	YES	GFELSSSTR	54	-0.355177	0.768097	-0.0905612	0.227931	0.109698	0.47342	-0.0378643	0.137761	0.306708	-0.0905612
PIK3C2A	Phosphatidylinositol 4-phosphate 3-kinase C2 domain-containing subunit alpha	O00443	NO	YES	VSNLQVSPK	253	-0.357205	0.681689	0.146229	0.230419	0.0299745	0.0368112	0.37112	0.80485	0.222671	0.146229
PIK3C2A	Phosphatidylinositol 4-phosphate 3-kinase C2 domain-containing subunit alpha	O00443	NO	YES	ALDIDVEKLTQAELEK	87	-0.942089	0.575857	-0.294732	0.176613	-0.570468	0.375793	-0.838452	0.806373	0.0394129	-0.294732
PIK3C2A	Phosphatidylinositol 4-phosphate 3-kinase C2 domain-containing subunit alpha	O00443	NO	YES	DALQPQTTDAEATIFFTR	1356	-0.633582	0.575307	-1.07689	0.81658	-0.945275	1.12615	-0.943619	1.23996	1.10717	-1.07689
PIK3C2A	Phosphatidylinositol 4-phosphate 3-kinase C2 domain-containing subunit alpha	O00443	NO	YES	FNFFIHNLAQLR	1386	0.215281	0.566737	0.249866	0.673465	0.223337	0.767526	0.133721	0.389196	0.337838	0.249866
PIK3C2A	Phosphatidylinositol 4-phosphate 3-kinase C2 domain-containing subunit alpha	O00443	NO	YES	VGEDLRQDMLALQMIK	1139	0.773049	0.420502	-1.45069	0.528004	0.568703	0.303108	0.41906	0.262172	0.238248	-1.45069
PIK3C2A	Phosphatidylinositol 4-phosphate 3-kinase C2 domain-containing subunit alpha	O00443	NO	YES	ENFFLGGVTLPLKDFNLSK	1654	-0.626693	0.405855	0.132413	0.0627466	-0.516924	0.270779	-0.412484	0.205941	0.0266528	0.132413
PIK3C2A	Phosphatidylinositol 4-phosphate 3-kinase C2 domain-containing subunit alpha	O00443	NO	YES	STANCHLERK	313	0.900859	0.380314	0.129912	0.0535709	0.486678	0.24227	-0.239134	0.0890447	0.20378	0.129912
PIK3C2A	Phosphatidylinositol 4-phosphate 3-kinase C2 domain-containing subunit alpha	O00443	NO	YES	FSGLPSNDEPILSFSPK	1398	0.257189	0.323799	0.0390327	0.0306506	-0.0307532	0.0264404	0.0702875	0.0825199	0.206752	0.0390327
PIK3C2A	Phosphatidylinositol 4-phosphate 3-kinase C2 domain-containing subunit alpha	O00443	NO	YES	LIESSLGSIATK	1374	0.874628	0.303549	0.588126	0.212725	-0.410281	0.132634	-0.0780034	0.0223431	0.159237	0.588126
PIK3C2A	Phosphatidylinositol 4-phosphate 3-kinase C2 domain-containing subunit alpha	O00443	NO	YES	ARTDLEITDSK	242	-0.255066	0.273273	-0.444655	0.468598	-1.24115	1.1664	-0.207629	0.316689	0.181042	-0.444655
PIK3C2A	Phosphatidylinositol 4-phosphate 3-kinase C2 domain-containing subunit alpha	O00443	NO	YES	IASTSEFLK	230	-0.259392	0.268329	-0.177672	0.228586	0.423582	0.655525	-0.0669931	0.0576616	0.316291	-0.177672
PIK3C2A	Phosphatidylinositol 4-phosphate 3-kinase C2 domain-containing subunit alpha	O00443	NO	YES	HPVEELLDSYHNQVELALQIENQHR	548	-0.380912	0.207842	0.416722	0.418209	-0.1038	0.076955	-1.54907	1.31064	0.374307	0.416722
PIK3C2A	Phosphatidylinositol 4-phosphate 3-kinase C2 domain-containing subunit alpha	O00443	NO	YES	SEDISKFDWLDLDPLSKPK	262	-0.193389	0.16094	0.346432	0.517301	-0.265283	0.429187	-0.0763615	0.0786075	0.181753	0.346432
PIK3C2A	Phosphatidylinositol 4-phosphate 3-kinase C2 domain-containing subunit alpha	O00443	NO	YES	EGQIEPSFVFR	1451	0.280593	0.138713	0.453185	0.222258	-1.27985	0.546903	0.175534	0.0792993	0.227582	0.453185
PIK3C2A	Phosphatidylinositol 4-phosphate 3-kinase C2 domain-containing subunit alpha	O00443	NO	YES	LSIIFPLWKLPGFPNR	1473	-0.126693	0.115418	0.492872	0.605478	0.0594338	0.038099	0.0866701	0.0843753	0.0296816	0.492872
PIK3C2A	Phosphatidylinositol 4-phosphate 3-kinase C2 domain-containing subunit alpha	O00443	NO	YES	TADVTSLFGGEDTSR	614	-0.0328972	0.0830917	0.0678104	0.281387	0.0863717	0.434214	0.098038	0.490578	0.42511	0.0678104
PIK3C2A	Phosphatidylinositol 4-phosphate 3-kinase C2 domain-containing subunit alpha	O00443	NO	YES	TNPGYLLSPVTAQR	402	-0.0565542	0.0743578	0.282451	0.517955	0.25794	0.488961	0.433055	0.908356	0.537739	0.282451
PIK3C2A	Phosphatidylinositol 4-phosphate 3-kinase C2 domain-containing subunit alpha	O00443	NO	YES	SLSVATVTR	327	0.0393069	0.0516615	0.116121	0.242582	-0.0596541	0.084031	-0.201444	0.304543	0.0239519	0.116121
PIK3C2A	Phosphatidylinositol 4-phosphate 3-kinase C2 domain-containing subunit alpha	O00443	NO	YES	LSIIFPLWK	1473	0.0426158	0.043268	0.127184	0.170525	0.293379	0.318959	0.0931875	0.0979389	0.415314	0.127184
PIK3C2A	Phosphatidylinositol 4-phosphate 3-kinase C2 domain-containing subunit alpha	O00443	NO	YES	LVQLLGGVAEK	1052	0.0347862	0.0362149	-0.427565	0.813174	-0.0812465	0.138264	-0.246077	0.241822	0.801917	-0.427565
PIK3C2A	Phosphatidylinositol 4-phosphate 3-kinase C2 domain-containing subunit alpha	O00443	NO	YES	VSLPLFDFKR	791	0.0174661	0.035697	-0.0985447	0.214901	-0.0926972	0.221012	0.0190496	0.0444099	0.0806159	-0.0985447
PLK4	Serine/threonine-protein kinase PLK4	O00444	YES	YES	LSLSSVLDHPFMSR	254	0.885202	1.24001	0.37413	0.465403	0.730781	0.924981	0.509431	0.707229	0.325473	0.37413
PLK4	Serine/threonine-protein kinase PLK4	O00444	YES	YES	DLTLSNLLLTR	136	-0.846141	1.23614	-2.68243	2.11828	-1.80655	2.96277	-1.98383	2.34724	1.70702	-2.68243
STK25	Serine/threonine-protein kinase 25	O00506	YES	YES	AANVLLSEQGDVK	143	-0.267042	0.675759	-0.189585	2.08407	-0.711021	6.74048	-0.801275	6.9812	6.35379	-0.189585
STK25	Serine/threonine-protein kinase 25	O00506	YES	YES	ADIWSLGITAIELAK	196	-0.258484	0.438347	-0.401777	2.36899	-0.887497	4.55731	-0.981084	5.16656	5.38581	-0.401777
STK25	Serine/threonine-protein kinase 25	O00506	YES	YES	TSFLTELIDR	277	-0.282627	0.31983	-0.376665	0.842653	-0.869093	3.57054	-1.96092	2.25094	3.77048	-0.376665
STK25	Serine/threonine-protein kinase 25	O00506	YES	YES	GTALHSSQKPAEPVKR	336	0.146109	0.225025	-0.0390163	0.0431064	-0.076576	0.110372	0.128809	0.214115	0.0392198	-0.0390163
STK25	Serine/threonine-protein kinase 25	O00506	YES	YES	SQCLSTLVRPVFGELKEK	355	0.252827	0.185821	0.162466	0.0614226	0.0293935	0.0190731	0.0541415	0.0331589	0.821458	0.162466
STK25	Serine/threonine-protein kinase 25	O00506	YES	YES	SQCLSTLVRPVFGELK	355	0.185149	0.15065	1.23315	1.74711	0.169333	0.129926	0.952971	1.11292	0.673491	1.23315
STK25	Serine/threonine-protein kinase 25	O00506	YES	YES	KTSFLTELIDR	276	0.00122272	0.00173055	-0.416669	0.847762	-0.579994	1.07234	-0.556424	1.35256	1.18424	-0.416669
PIK3C2B	Phosphatidylinositol 4-phosphate 3-kinase C2 domain-containing subunit beta	O00750	NO	YES	LLFPSSHLPSFPSR	1418	-0.309898	0.220653	0.00417508	0.00346492	0.457175	0.517202	-0.861314	0.840805	0.929675	0.00417508
PDXK	Pyridoxal kinase	O00764	NO	YES	AQAGEGVRPSPMQLELR	276	-1.6075	1.15109	-1.8605	0.823384	-0.219733	0.209441	-0.641682	0.252492	0.652713	-1.8605
PDXK	Pyridoxal kinase	O00764	NO	YES	DKSFLAMVVDIVQELK	87	-1.7815	0.681022	-0.429366	0.25719	0.309471	0.123463	-0.557729	0.414419	0.734991	-0.429366
PDXK	Pyridoxal kinase	O00764	NO	YES	LNNMNKYDYVLTGYTR	71	-0.607132	0.286106	-0.69383	0.265949	-0.586806	0.315803	-0.840007	0.48106	0.408084	-0.69383
PDXK	Pyridoxal kinase	O00764	NO	YES	VVPLADIITPNQFEAELLSGR	140	0.0436701	0.0726744	0.143005	0.269849	0.0598369	0.116194	0.0260722	0.0492017	0.259876	0.143005
CIT	Citron Rho-interacting kinase	O14578	YES	YES	AQEEMISELR	804	0.299497	1.17251	0.151235	0.309954	0.367042	1.70774	0.501079	2.27911	0.545856	0.151235
CIT	Citron Rho-interacting kinase	O14578	YES	YES	SPFAEGTSAR	301	-1.43305	1.08899	-1.59157	1.97032	-1.00396	0.990674	-1.9582	2.95313	1.11767	-1.59157
CIT	Citron Rho-interacting kinase	O14578	YES	YES	LAAEEFKR	594	1.41042	0.950337	-2.22855	0.857615	0.52339	0.166468	-0.137786	0.0396172	0.252431	-2.22855
CIT	Citron Rho-interacting kinase	O14578	YES	YES	VLIYDNEAR	1475	-0.388174	0.784931	0.158252	0.311384	0.246068	0.753793	0.113012	0.276322	0.381506	0.158252
CIT	Citron Rho-interacting kinase	O14578	YES	YES	SESVVSGLDSPAK	431	1.79717	0.741926	-0.26746	0.0931877	0.482498	0.103239	0.224719	0.0642457	0.0356693	-0.26746
CIT	Citron Rho-interacting kinase	O14578	YES	YES	QVVELAVK	1087	-0.572845	0.730107	-0.0498501	0.112578	-0.299577	0.824206	0.0651018	0.149287	0.334418	-0.0498501
CIT	Citron Rho-interacting kinase	O14578	YES	YES	IDWNNIR	363	-0.880482	0.727432	-0.520518	0.656841	-1.37479	1.22092	-0.994699	0.98878	1.56196	-0.520518
CIT	Citron Rho-interacting kinase	O14578	YES	YES	QQIAMSAIVR	1312	0.185532	0.679445	0.147705	0.548403	0.0973227	0.224775	0.10071	0.486834	0.851761	0.147705
CIT	Citron Rho-interacting kinase	O14578	YES	YES	SDLEYQLENIQVLYSHEK	1192	-1.59879	0.650173	-0.444822	0.183751	0.182276	0.113023	0.399428	0.350976	0.366221	-0.444822
CIT	Citron Rho-interacting kinase	O14578	YES	YES	LTQGLQEALDR	1173	-0.406296	0.569971	-0.45414	0.340888	-0.320025	0.268943	-0.03807	0.0376257	0.189176	-0.45414
CIT	Citron Rho-interacting kinase	O14578	YES	YES	LKFEGLCCHPFFSK	349	0.652231	0.567537	0.120365	0.0887991	-0.610327	0.280922	0.182081	0.10897	0.742043	0.120365
CIT	Citron Rho-interacting kinase	O14578	YES	YES	MVNAKLPIGTPDYMAPEVLTVMNGDGK	251	0.597772	0.503291	0.229059	0.200554	0.353966	0.156311	1.22942	1.71089	0.0807939	0.229059
CIT	Citron Rho-interacting kinase	O14578	YES	YES	LLELETR	851	-0.15434	0.45214	-0.19162	0.604671	-0.290228	0.954944	0.00579119	0.0152099	0.879878	-0.19162
CIT	Citron Rho-interacting kinase	O14578	YES	YES	WVTALESVVAGGR	1554	-0.2049	0.412081	0.0802586	0.175601	-0.0984457	0.198367	0.202407	0.567013	0.518086	0.0802586
CIT	Citron Rho-interacting kinase	O14578	YES	YES	TLYLLAPSFPDKQR	1540	-0.242735	0.410575	-0.193704	0.301411	-0.790436	1.1529	-0.187751	0.24359	0.361159	-0.193704
CIT	Citron Rho-interacting kinase	O14578	YES	YES	LMMNQLEEDLVSAR	566	-0.486217	0.404934	-0.783007	0.8369	-0.749764	0.783327	-0.851414	0.719874	1.13584	-0.783007
CIT	Citron Rho-interacting kinase	O14578	YES	YES	NSPPPFVPTLK	370	0.319112	0.400362	-0.353342	0.489762	-0.381323	0.48534	-0.931526	1.29325	1.35647	-0.353342
CIT	Citron Rho-interacting kinase	O14578	YES	YES	IQELQEKLEK	638	-0.23994	0.380738	0.139381	0.165161	-0.00936813	0.0131886	-0.017686	0.0212475	0.72725	0.139381
CIT	Citron Rho-interacting kinase	O14578	YES	YES	QLTELQLSLQER	875	-0.51664	0.357595	0.0513582	0.0413646	0.104179	0.127544	0.101598	0.0688048	0.716583	0.0513582
CIT	Citron Rho-interacting kinase	O14578	YES	YES	CAELEEALQK	1272	-0.353117	0.351316	0.400962	0.440757	0.481989	0.61155	0.196931	0.198333	0.476677	0.400962
CIT	Citron Rho-interacting kinase	O14578	YES	YES	QLDEASGANDEIVQLR	973	0.290454	0.338525	0.227546	0.255573	0.276748	0.309353	-0.144272	0.114088	0.21733	0.227546
CIT	Citron Rho-interacting kinase	O14578	YES	YES	ASTEATELLQNIR	651	-0.4322	0.335439	0.32775	0.260261	0.0112383	0.00743295	-0.0342312	0.0222445	0.0917281	0.32775
CIT	Citron Rho-interacting kinase	O14578	YES	YES	VASSPAPPEGPSHPREPSTPHR	1937	-0.263014	0.332874	-0.108501	0.0778454	-0.228929	0.28914	-0.205306	0.22909	0.198693	-0.108501
CIT	Citron Rho-interacting kinase	O14578	YES	YES	LIDFLQAK	1222	-0.111662	0.31618	0.0723741	0.217178	0.0407827	0.0966091	0.00874799	0.016998	0.087783	0.0723741
CIT	Citron Rho-interacting kinase	O14578	YES	YES	LTQGLQEALDRADLLK	1173	-0.31431	0.304787	0.160269	0.152826	-0.593206	0.632825	-0.362717	0.402442	0.0312634	0.160269
CIT	Citron Rho-interacting kinase	O14578	YES	YES	VSEVEAVLSQK	479	-0.364182	0.290008	0.296205	0.299878	0.255555	0.251761	0.275663	0.304996	0.0797534	0.296205
CIT	Citron Rho-interacting kinase	O14578	YES	YES	AEILALQQALK	1098	-0.245418	0.254042	-0.893362	0.643084	-0.520406	0.572363	0.178259	0.259623	0.589315	-0.893362
CIT	Citron Rho-interacting kinase	O14578	YES	YES	TFNNIMNFQR	311	0.117349	0.226679	0.100492	0.168215	0.247458	0.706305	0.274729	0.699676	0.413569	0.100492
CIT	Citron Rho-interacting kinase	O14578	YES	YES	MEVSQEDDKALQLLHDIR	526	-0.39808	0.214503	-0.559111	0.341895	0.27506	0.183215	-1.06928	0.72651	0.422127	-0.559111
CIT	Citron Rho-interacting kinase	O14578	YES	YES	KATDHPHPSTPATAR	1297	-0.28011	0.182579	-1.10294	0.76553	-0.252413	0.454257	-0.465457	0.442606	0.436068	-1.10294
CIT	Citron Rho-interacting kinase	O14578	YES	YES	DLADKETLENMMQR	735	-0.399291	0.135766	0.147015	0.0451179	0.288105	0.118174	-0.000214961	9.28516e-05	0.10237	0.147015
CIT	Citron Rho-interacting kinase	O14578	YES	YES	SLLEQDLATYITECSSLKR	501	-0.0244825	0.112612	0.0950125	0.553488	0.0619326	0.307722	-0.0593825	0.401238	0.129334	0.0950125
CIT	Citron Rho-interacting kinase	O14578	YES	YES	CAVCLDTVHFGR	1376	0.22549	0.107512	0.970233	0.780695	1.07963	0.96773	0.269375	0.154091	0.498549	0.970233
CIT	Citron Rho-interacting kinase	O14578	YES	YES	EAQVSAQHLEVHLK	702	0.165247	0.0984333	0.623739	0.707344	0.898268	1.18609	0.373915	0.374459	0.0336613	0.623739
CIT	Citron Rho-interacting kinase	O14578	YES	YES	FYLETQAGKLEAQNR	817	-0.0283612	0.0628965	0.0934881	0.234867	0.05731	0.165216	0.0849216	0.261751	0.119984	0.0934881
CIT	Citron Rho-interacting kinase	O14578	YES	YES	ESQLTALQAAR	887	0.0361072	0.0391015	-0.0117826	0.0131417	-0.0260663	0.0194331	0.0816181	0.102583	0.138596	-0.0117826
CIT	Citron Rho-interacting kinase	O14578	YES	YES	SPEHQPSAMSLLAPPSSR	1322	0.0512422	0.0356883	-0.289079	0.241387	0.188819	0.146871	0.0329939	0.0248674	0.445209	-0.289079
CIT	Citron Rho-interacting kinase	O14578	YES	YES	LTQGLQEALDRADLLKTER	1173	-0.0145833	0.0353922	-0.250332	0.982012	-0.931649	0.918214	-0.233564	0.453069	0.221882	-0.250332
CIT	Citron Rho-interacting kinase	O14578	YES	YES	LAANSSLFTQR	790	-0.0095341	0.0308403	0.0476061	0.209767	0.0710014	0.372902	0.10486	0.559206	0.329616	0.0476061
CIT	Citron Rho-interacting kinase	O14578	YES	YES	NPLDAGAAEPIASR	10	0.0209063	0.019492	-1.37564	1.33309	-0.2204	0.209446	-0.325442	0.394863	0.0474394	-1.37564
CIT	Citron Rho-interacting kinase	O14578	YES	YES	ESSTPEEFSR	1342	-0.00291722	0.00138943	0.167077	0.0833223	0.299333	0.158075	0.0090313	0.00395555	0.0833833	0.167077
RIOK3	Serine/threonine-protein kinase RIO3	O14730	YES	YES	EMHNLAR	332	-1.77334	1.03057	0.137453	0.169509	-0.17561	0.346074	-0.358581	0.23735	0.129228	0.137453
RIOK3	Serine/threonine-protein kinase RIO3	O14730	YES	YES	MWAEKEMHNLAR	327	0.817042	0.870903	-0.733565	0.7194	-0.985377	0.41734	-0.666154	0.3862	0.530297	-0.733565
RIOK3	Serine/threonine-protein kinase RIO3	O14730	YES	YES	AASFLKDDGDPPLLYDE	503	-1.60683	0.812325	-0.320317	0.129427	-2.08991	1.49387	0.0491027	0.0495686	0.012787	-0.320317
RIOK3	Serine/threonine-protein kinase RIO3	O14730	YES	YES	VIPTECAIK	282	-0.720052	0.757664	-0.743686	0.950958	-0.423131	0.478091	-0.00215206	0.000958852	0.567975	-0.743686
RIOK3	Serine/threonine-protein kinase RIO3	O14730	YES	YES	DDPYRPAKPVPTPK	139	0.747332	0.715999	-0.102711	0.0660233	-0.967506	0.555732	-2.0578	0.56511	0.534886	-0.102711
RIOK3	Serine/threonine-protein kinase RIO3	O14730	YES	YES	HDEVVCGR	166	-0.3218	0.651012	0.023059	0.0294451	0.0270881	0.0358832	0.256681	0.567027	0.0183579	0.023059
RIOK3	Serine/threonine-protein kinase RIO3	O14730	YES	YES	AGIPCPTVVLLK	342	0.113596	0.607921	0.140776	0.575099	0.186995	1.04027	0.0890112	0.441983	0.270543	0.140776
RIOK3	Serine/threonine-protein kinase RIO3	O14730	YES	YES	TTLNEFK	294	-1.04855	0.552977	0.0666883	0.149421	0.250555	1.23553	0.00616596	0.0202315	0.497739	0.0666883
RIOK3	Serine/threonine-protein kinase RIO3	O14730	YES	YES	LSNHVFNALK	198	0.282541	0.549385	0.338016	0.900712	0.506781	1.21973	0.339583	0.484317	0.889165	0.338016
RIOK3	Serine/threonine-protein kinase RIO3	O14730	YES	YES	MVNSGMLETITGCISTGK	244	0.181456	0.543591	0.133839	0.281109	0.111378	0.246414	0.0866711	0.188539	0.475502	0.133839
RIOK3	Serine/threonine-protein kinase RIO3	O14730	YES	YES	LNSEEMK	377	-0.369676	0.483889	-0.676111	0.846735	1.06146	1.55217	-0.539956	0.667881	0.500968	-0.676111
RIOK3	Serine/threonine-protein kinase RIO3	O14730	YES	YES	KHILVMSFIGHDQVPAPK	354	-0.452247	0.402767	-3.03009	1.14347	-1.40938	1.01841	-1.04014	0.666684	1.30023	-3.03009
RIOK3	Serine/threonine-protein kinase RIO3	O14730	YES	YES	EAYYQTLHLMR	384	0.0829514	0.374685	0.101394	0.451755	0.200795	1.28374	0.107449	0.60633	0.603048	0.101394
RIOK3	Serine/threonine-protein kinase RIO3	O14730	YES	YES	VSISFENYR	109	0.0773702	0.343511	0.0732052	0.287796	0.0933045	0.430708	0.0704408	0.317373	0.488907	0.0732052
RIOK3	Serine/threonine-protein kinase RIO3	O14730	YES	YES	VWLIDVSQSVEPTHPHGLEFLFR	419	-0.184916	0.199331	-0.00690288	0.00965052	-0.205668	0.313606	-0.292931	0.549007	0.323274	-0.00690288
RIOK3	Serine/threonine-protein kinase RIO3	O14730	YES	YES	QLYHECTLVHADLSEYNMLWHAGK	395	0.249727	0.199088	-0.222563	0.140708	0.440463	0.447	0.237192	0.174791	0.161	-0.222563
RIOK3	Serine/threonine-protein kinase RIO3	O14730	YES	YES	HILVMSFIGHDQVPAPK	355	0.0657312	0.16355	0.106105	0.251033	0.11478	0.370333	-0.00378825	0.00908924	0.0118813	0.106105
RIOK3	Serine/threonine-protein kinase RIO3	O14730	YES	YES	HDEVVCGRK	166	0.142976	0.132906	-0.554264	0.594935	-0.439915	0.471644	-0.483061	0.599774	0.559992	-0.554264
RIOK3	Serine/threonine-protein kinase RIO3	O14730	YES	YES	AGIPCPTVVLLKK	342	0.0459276	0.122234	0.18453	0.570275	0.0272319	0.0535577	0.00299316	0.00605675	0.30482	0.18453
RIOK3	Serine/threonine-protein kinase RIO3	O14730	YES	YES	MENFAPEFQVGDGIGMDLK	179	-0.118328	0.0984217	0.311269	0.356277	0.338505	0.494015	0.414241	0.609474	0.293279	0.311269
RIOK3	Serine/threonine-protein kinase RIO3	O14730	YES	YES	CPWAIPQNTISCSLADVMSEQLAK	22	-0.11647	0.0686881	-0.489322	0.430295	-0.228778	0.177323	-0.335682	0.228524	0.0466001	-0.489322
RIOK3	Serine/threonine-protein kinase RIO3	O14730	YES	YES	NVSQFFQK	445	0.000636629	0.00175593	0.0765805	0.274909	0.156346	0.941341	0.0714275	0.336453	0.0481676	0.0765805
MAP2K7	Dual specificity mitogen-activated protein kinase kinase 7	O14733	YES	YES	MQGPIPER	210	0.138395	0.928892	-0.027739	0.104	0.0466569	0.246813	0.0110844	0.060258	0.338649	-0.027739
MAP2K7	Dual specificity mitogen-activated protein kinase kinase 7	O14733	YES	YES	LLEHSFIK	374	-1.21536	0.494823	1.1019	0.854996	-2.41505	2.00366	0.252733	0.11609	0.904922	1.1019
MAP2K7	Dual specificity mitogen-activated protein kinase kinase 7	O14733	YES	YES	HMLGLPSTLFTPR	73	0.094804	0.465206	0.119853	0.484276	0.14448	0.960404	0.152894	1.04848	1.22916	0.119853
MAP2K7	Dual specificity mitogen-activated protein kinase kinase 7	O14733	YES	YES	MTVAIVK	222	0.320529	0.368126	0.405289	0.471837	0.272346	0.305093	-0.916272	0.714146	0.665671	0.405289
MAP2K7	Dual specificity mitogen-activated protein kinase kinase 7	O14733	YES	YES	SPSSESSPQHPTPPARPR	55	0.164642	0.288871	-0.500581	1.0238	-0.372819	0.669323	-0.00888701	0.0130137	0.590434	-0.500581
MAP2K7	Dual specificity mitogen-activated protein kinase kinase 7	O14733	YES	YES	TSGVLSQPHLPFFR	406	0.06553	0.246862	0.203788	1.07636	0.0905904	0.380601	0.0715088	0.174619	0.937381	0.203788
MAP2K7	Dual specificity mitogen-activated protein kinase kinase 7	O14733	YES	YES	QTGYLTIGGQR	102	-0.0776155	0.233254	0.0106111	0.031123	0.00366066	0.0129282	-0.069202	0.274071	0.200371	0.0106111
MAP2K7	Dual specificity mitogen-activated protein kinase kinase 7	O14733	YES	YES	LCDFGISGR	259	0.0481917	0.212388	-0.056625	0.237262	0.00823985	0.0511336	0.0552551	0.476505	0.189611	-0.056625
MAP2K7	Dual specificity mitogen-activated protein kinase kinase 7	O14733	YES	YES	IDLNLDISPQRPRPTLQLPLANDGGSR	28	-0.835269	0.17731	-2.23332	0.80535	-1.22711	0.267871	0.305234	0.0603701	0.0408954	-2.23332
MAP2K7	Dual specificity mitogen-activated protein kinase kinase 7	O14733	YES	YES	RYETLEVDVASWFKDVMAK	382	-0.296868	0.174899	0.129966	0.135066	-0.270556	0.307286	-0.78652	0.786573	0.243498	0.129966
MAP2K7	Dual specificity mitogen-activated protein kinase kinase 7	O14733	YES	YES	ILMDLDVVLK	163	-0.103907	0.167299	0.196615	0.420516	-0.192539	0.515664	-0.0769593	0.133067	0.437387	0.196615
MAP2K7	Dual specificity mitogen-activated protein kinase kinase 7	O14733	YES	YES	TDFEVLTK	327	0.0539678	0.160465	0.112956	0.425369	0.0938816	0.397797	0.0837308	0.332227	0.603387	0.112956
MAP2K7	Dual specificity mitogen-activated protein kinase kinase 7	O14733	YES	YES	RYETLEVDVASWFK	382	0.107721	0.117305	0.182466	0.267064	0.309809	0.67673	-0.625189	0.950644	0.0238249	0.182466
MAP2K7	Dual specificity mitogen-activated protein kinase kinase 7	O14733	YES	YES	YQAEINDLENLGEMGSGTCGQVWK	113	-0.371938	0.109938	-1.70336	0.805637	-0.137386	0.0399605	-1.07933	0.364046	0.330734	-1.70336
MAP2K7	Dual specificity mitogen-activated protein kinase kinase 7	O14733	YES	YES	TGHVIAVK	142	0.344547	0.0925001	0.533937	0.193636	1.0981	0.45186	1.26343	0.577096	0.183597	0.533937
MAP2K7	Dual specificity mitogen-activated protein kinase kinase 7	O14733	YES	YES	YETLEVDVASWFK	383	-0.0843403	0.0503756	0.194851	0.143506	-0.406934	0.313826	-0.143072	0.118742	0.143826	0.194851
MAP2K7	Dual specificity mitogen-activated protein kinase kinase 7	O14733	YES	YES	VLQEEPPLLPGHMGFSGDFQSFVK	335	0.0138178	0.0384516	0.069176	0.185178	-0.118732	0.349178	-0.101492	0.354491	0.556304	0.069176
MAP2K7	Dual specificity mitogen-activated protein kinase kinase 7	O14733	YES	YES	SAGCAAYMAPER	277	-0.0181521	0.0295902	-0.0669034	0.116999	0.0119015	0.0224249	-0.05808	0.140289	0.200854	-0.0669034
MAP2K7	Dual specificity mitogen-activated protein kinase kinase 7	O14733	YES	YES	DVKPSNILLDER	243	0.0104208	0.0248793	-0.291848	0.914276	-0.0537632	0.164638	0.0479341	0.27439	0.315288	-0.291848
MAP2K7	Dual specificity mitogen-activated protein kinase kinase 7	O14733	YES	YES	SMESIEIDQK	86	0.00666176	0.0166375	-0.105199	0.362795	-0.05368	0.254525	0.155566	0.825673	0.722862	-0.105199
CHEK1	Serine/threonine-protein kinase Chk1	O14757	YES	YES	VTEEAVAVK	30	-0.943405	1.15756	-1.41007	2.94249	-2.18991	2.19519	-2.41829	3.47565	2.15439	-1.41007
CHEK1	Serine/threonine-protein kinase Chk1	O14757	YES	YES	AVDCPENIKK	45	-1.11541	1.11159	-1.72393	1.62632	-2.04532	2.88043	-1.83643	2.61866	3.20761	-1.72393
CHEK1	Serine/threonine-protein kinase Chk1	O14757	YES	YES	ISDFGLATVFR	146	-0.645555	1.10272	-1.07823	4.279	-1.4045	4.91357	-1.47083	5.19676	5.52543	-1.07823
CHEK1	Serine/threonine-protein kinase Chk1	O14757	YES	YES	ILVENPSAR	245	-1.54057	1.02499	-3.36157	2.53155	-3.52419	6.06289	-3.45896	3.27707	4.27116	-3.36157
CHEK1	Serine/threonine-protein kinase Chk1	O14757	YES	YES	TGLSLWDTSPSYIDK	323	-1.96615	0.953652	-0.0128261	0.00853636	0.0731095	0.0567234	-0.136714	0.124777	0.745779	-0.0128261
CHEK1	Serine/threonine-protein kinase Chk1	O14757	YES	YES	KIDSAPLALLHK	233	-0.967263	0.951557	-2.09706	4.90422	-3.25615	5.45755	-3.23787	5.95746	5.29368	-2.09706
CHEK1	Serine/threonine-protein kinase Chk1	O14757	YES	YES	MCGTLPYVAPELLK	167	-0.655132	0.830147	-1.45386	5.05597	-1.90949	6.17631	-2.21997	3.99885	5.12333	-1.45386
CHEK1	Serine/threonine-protein kinase Chk1	O14757	YES	YES	MLNHENVVK	61	-0.570743	0.788576	-1.85301	1.93641	-2.3532	2.4889	-2.0114	2.84991	1.81944	-1.85301
CHEK1	Serine/threonine-protein kinase Chk1	O14757	YES	YES	DIKPENLLLDERDNLK	130	-0.948847	0.783804	-1.3358	2.78524	-1.83362	4.47705	-1.83664	4.06286	4.52163	-1.3358
CHEK1	Serine/threonine-protein kinase Chk1	O14757	YES	YES	DIKPENLLLDER	130	-0.682528	0.429471	-1.31817	1.63886	-1.15986	1.15444	-2.63405	3.07119	1.75991	-1.31817
CHEK1	Serine/threonine-protein kinase Chk1	O14757	YES	YES	GDGLEFKR	446	1.28664	0.386889	0.356872	0.153647	0.603544	0.240623	1.60229	0.940885	0.650516	0.356872
CHEK1	Serine/threonine-protein kinase Chk1	O14757	YES	YES	MCGTLPYVAPELLKR	167	-0.786509	0.369524	-0.550277	0.27259	-0.0146711	0.00692666	-0.319587	0.225905	0.0108841	-0.550277
CHEK1	Serine/threonine-protein kinase Chk1	O14757	YES	YES	SCMNQVTISTTDRR	407	0.531682	0.336331	-0.398608	0.242783	-0.00600421	0.0033791	-1.45127	1.33572	0.778801	-0.398608
CHEK1	Serine/threonine-protein kinase Chk1	O14757	YES	YES	WYNKPLKK	264	0.31911	0.25643	0.305867	0.219612	0.62841	0.529884	1.33315	0.799508	0.49146	0.305867
CHEK1	Serine/threonine-protein kinase Chk1	O14757	YES	YES	LVQGISFSQPTCPDHMLLNSQLLGTPGSSQNPWQR	338	0.479222	0.219792	0.29854	0.113519	-0.291429	0.106524	0.936073	0.357141	0.503347	0.29854
CHEK1	Serine/threonine-protein kinase Chk1	O14757	YES	YES	FFHQLMAGVVYLHGIGITHR	110	-0.407299	0.20229	0.0992823	0.0446504	-0.0244598	0.00910949	-0.80233	0.466901	0.395482	0.0992823
CHEK1	Serine/threonine-protein kinase Chk1	O14757	YES	YES	HIQSNLDFSPVNSASSEENVK	293	-0.0563663	0.168344	0.0400904	0.108979	-0.0760036	0.329833	-0.118058	0.695987	0.478684	0.0400904
CHEK1	Serine/threonine-protein kinase Chk1	O14757	YES	YES	LIDIVSSQK	462	-0.0164281	0.0571803	-0.0793847	0.295069	-0.374496	1.63744	-0.226055	1.13528	1.78377	-0.0793847
CHEK1	Serine/threonine-protein kinase Chk1	O14757	YES	YES	VNLLEMDDK	428	-0.0636815	0.03725	-0.0808334	0.044858	-0.537384	0.308054	-0.161008	0.0964821	0.0194199	-0.0808334
CHEK1	Serine/threonine-protein kinase Chk1	O14757	YES	YES	VTSGGVSESPSGFSK	278	-0.0018424	0.00682099	0.0546468	0.286937	0.0834862	0.616363	0.0689694	0.498713	0.247989	0.0546468
BCKDK	Branched-chain alpha-ketoacid dehydrogenase kinase	O14874	YES	YES	LTPTMMLYAGR	70	-0.622031	0.234793	0.139652	0.115272	0.143934	0.106172	0.300322	0.429281	0.440249	0.139652
IKBKB	Inhibitor of nuclear factor kappa-B kinase subunit beta	O14920	YES	YES	ITYETQISPRPQPESVSCILQEPK	395	-0.86387	1.58834	-0.302205	0.317702	-0.960457	1.65104	-1.16839	2.25392	1.11145	-0.302205
IKBKB	Inhibitor of nuclear factor kappa-B kinase subunit beta	O14920	YES	YES	ITYETQISPRPQPESVSCILQEPKR	395	-1.47188	1.23384	-1.22566	0.845228	-1.29746	1.08549	0.390782	0.170043	0.961538	-1.22566
IKBKB	Inhibitor of nuclear factor kappa-B kinase subunit beta	O14920	YES	YES	TEGDSQEMVR	583	-1.72206	1.12844	-0.0520597	0.0591265	0.322111	0.391932	-0.120264	0.0625049	0.165786	-0.0520597
IKBKB	Inhibitor of nuclear factor kappa-B kinase subunit beta	O14920	YES	YES	FSSSLPYPNNLNSVLAER	255	-2.13581	0.93617	-0.474779	0.131511	-1.24859	0.370392	-1.92032	0.65675	0.497868	-0.474779
IKBKB	Inhibitor of nuclear factor kappa-B kinase subunit beta	O14920	YES	YES	GTDPTYGPNGCFK	289	0.308832	0.821034	-0.929807	0.534359	-0.311275	0.36522	-0.65897	0.48483	0.126161	-0.929807
IKBKB	Inhibitor of nuclear factor kappa-B kinase subunit beta	O14920	YES	YES	ALELLPKVEEVVSLMNEDEK	622	-0.769525	0.755462	-0.529618	0.372997	-1.14578	1.25647	-1.05777	1.09213	0.68338	-0.529618
IKBKB	Inhibitor of nuclear factor kappa-B kinase subunit beta	O14920	YES	YES	QKELWNLLK	651	1.12196	0.670066	0.696626	0.2427	1.09835	0.733455	1.86131	1.54166	1.13386	0.696626
IKBKB	Inhibitor of nuclear factor kappa-B kinase subunit beta	O14920	YES	YES	LTHPNVVAAR	68	0.428865	0.646622	0.429198	0.730332	-0.878636	1.44421	-0.87594	0.667772	1.6774	0.429198
IKBKB	Inhibitor of nuclear factor kappa-B kinase subunit beta	O14920	YES	YES	FSSSLPYPNNLNSVLAERLEK	255	-0.692665	0.644845	0.0247705	0.0887511	-0.101024	0.381173	-0.00337933	0.0141955	0.00276135	0.0247705
IKBKB	Inhibitor of nuclear factor kappa-B kinase subunit beta	O14920	YES	YES	LLLQAIQSFEKK	593	0.279507	0.64394	0.107539	0.188818	0.140399	0.340996	0.0112061	0.0164977	0.0429759	0.107539
IKBKB	Inhibitor of nuclear factor kappa-B kinase subunit beta	O14920	YES	YES	WCLEIQIMR	58	-0.725954	0.575757	-0.628839	0.413998	-0.274862	0.177561	-1.47547	0.919208	1.00667	-0.628839
IKBKB	Inhibitor of nuclear factor kappa-B kinase subunit beta	O14920	YES	YES	DLKPENIVLQQGEQR	145	-0.144059	0.45687	-0.023017	0.0438732	-0.183139	0.961538	-0.307781	2.10549	2.03388	-0.023017
IKBKB	Inhibitor of nuclear factor kappa-B kinase subunit beta	O14920	YES	YES	EMEQAVELCGR	516	0.368856	0.386298	-0.373316	0.262072	-0.00738422	0.00436739	0.131673	0.124046	0.103129	-0.373316
IKBKB	Inhibitor of nuclear factor kappa-B kinase subunit beta	O14920	YES	YES	GPVSGSPDSMNASR	667	0.147103	0.375576	-0.127757	0.267651	0.159983	0.404403	0.152504	0.349925	0.396562	-0.127757
IKBKB	Inhibitor of nuclear factor kappa-B kinase subunit beta	O14920	YES	YES	LVHILNMVTGTIHTYPVTEDESLQSLK	311	-0.380775	0.369931	-0.609671	0.467683	-0.442146	0.549902	-0.215523	0.367142	0.665685	-0.609671
IKBKB	Inhibitor of nuclear factor kappa-B kinase subunit beta	O14920	YES	YES	VIYTQLSK	607	-0.0882636	0.355159	0.17857	0.942354	0.261989	2.129	0.178286	0.820984	0.880933	0.17857
IKBKB	Inhibitor of nuclear factor kappa-B kinase subunit beta	O14920	YES	YES	AAMMNLLR	453	0.117217	0.339934	-0.368454	1.06415	0.245357	1.46558	0.168021	0.475025	0.0418714	-0.368454
IKBKB	Inhibitor of nuclear factor kappa-B kinase subunit beta	O14920	YES	YES	RLTHPNVVAAR	67	0.401534	0.302947	0.0630036	0.069257	-0.00482363	0.00475139	-0.0837393	0.0986437	0.258017	0.0630036
IKBKB	Inhibitor of nuclear factor kappa-B kinase subunit beta	O14920	YES	YES	LSQPGQLMSQPSTASNSLPEPAKK	681	-0.185678	0.231409	0.0270631	0.0347941	-0.214697	0.43324	-0.270078	0.50902	0.25079	0.0270631
IKBKB	Inhibitor of nuclear factor kappa-B kinase subunit beta	O14920	YES	YES	ALDDILNLK	302	0.054573	0.229911	0.0375004	0.151474	0.0975451	0.387726	0.156056	0.880748	0.304316	0.0375004
IKBKB	Inhibitor of nuclear factor kappa-B kinase subunit beta	O14920	YES	YES	NSMASMSQQLK	470	0.450497	0.205729	0.410443	0.19063	1.09432	0.688404	1.07082	0.665254	0.342743	0.410443
IKBKB	Inhibitor of nuclear factor kappa-B kinase subunit beta	O14920	YES	YES	LNEGHTLDMDLVFLFDNSK	376	0.190457	0.199964	-0.347587	0.277926	-0.491417	0.258742	-1.70002	1.25269	0.496294	-0.347587
IKBKB	Inhibitor of nuclear factor kappa-B kinase subunit beta	O14920	YES	YES	VRGPVSGSPDSMNASR	665	-0.378754	0.175185	-1.81917	1.61568	-1.54816	1.19836	-1.65447	1.37745	0.567795	-1.81917
IKBKB	Inhibitor of nuclear factor kappa-B kinase subunit beta	O14920	YES	YES	LGTGGFGNVIR	21	-0.0425175	0.167389	-0.0286829	0.119767	-0.0473855	0.202918	-0.197117	0.986595	1.84199	-0.0286829
IKBKB	Inhibitor of nuclear factor kappa-B kinase subunit beta	O14920	YES	YES	KYLNQFENCCGLR	106	0.170587	0.114192	-0.196024	0.121466	-0.379606	0.258664	0.0798903	0.052101	0.628269	-0.196024
IKBKB	Inhibitor of nuclear factor kappa-B kinase subunit beta	O14920	YES	YES	KVWGQVWHSIQTLKEDCNR	428	0.306506	0.107542	-0.127238	0.0575775	0.382896	0.171659	0.0765345	0.0321628	0.00914433	-0.127238
IKBKB	Inhibitor of nuclear factor kappa-B kinase subunit beta	O14920	YES	YES	YLNQFENCCGLR	107	-0.0720798	0.102914	-0.314276	0.460175	0.0677	0.129158	-1.16003	1.11488	2.08014	-0.314276
IKBKB	Inhibitor of nuclear factor kappa-B kinase subunit beta	O14920	YES	YES	NLAFFQLR	420	0.144785	0.0785042	0.0801219	0.0417772	0.0977156	0.0464198	0.663039	0.617198	0.34968	0.0801219
IKBKB	Inhibitor of nuclear factor kappa-B kinase subunit beta	O14920	YES	YES	LLLQAIQSFEK	593	-0.0357128	0.0719851	0.0414854	0.0894256	0.104799	0.243908	0.00369939	0.0074286	0.0734148	0.0414854
IKBKB	Inhibitor of nuclear factor kappa-B kinase subunit beta	O14920	YES	YES	KQGGTLDDLEEQAR	555	-0.0950896	0.0682186	0.0561621	0.0425051	0.124628	0.09538	0.340209	0.405044	0.512564	0.0561621
IKBKB	Inhibitor of nuclear factor kappa-B kinase subunit beta	O14920	YES	YES	KSEELVAEAHNLCTLLENAIQDTVR	704	-0.197326	0.0587012	0.506856	0.247737	1.11048	0.612456	0.998621	0.555614	0.976953	0.506856
IKBKB	Inhibitor of nuclear factor kappa-B kinase subunit beta	O14920	YES	YES	QGGTLDDLEEQAR	556	0.104603	0.0507792	1.03972	0.889569	1.09367	0.902053	0.982953	0.802044	0.881825	1.03972
IKBKB	Inhibitor of nuclear factor kappa-B kinase subunit beta	O14920	YES	YES	SEELVAEAHNLCTLLENAIQDTVR	705	0.104924	0.0303717	0.971363	0.680626	-0.154421	0.0782058	0.309676	0.122092	0.00244306	0.971363
IKBKB	Inhibitor of nuclear factor kappa-B kinase subunit beta	O14920	YES	YES	WHNQETGEQIAIK	32	-0.00537732	0.00608682	-0.135375	0.190572	-0.020059	0.0260658	-0.219542	0.280243	0.675545	-0.135375
AURKA	Aurora kinase A	O14965	YES	YES	VLCPSNSSQR	47	-1.37164	2.09301	0.00681193	0.0143	0.384624	1.64732	0.28269	0.96648	1.12353	0.00681193
AURKA	Aurora kinase A	O14965	YES	YES	TATYITELANALSYCHSKR	233	-1.21385	1.92493	-2.3439	4.02215	-3.0102	3.69006	-2.78457	4.63292	3.76369	-2.3439
AURKA	Aurora kinase A	O14965	YES	YES	DIKPENLLLGSAGELK	256	-0.505113	1.65579	-1.71615	3.94895	-1.87392	4.99029	-1.59795	3.85439	4.23071	-1.71615
AURKA	Aurora kinase A	O14965	YES	YES	QWALEDFEIGRPLGK	127	-0.654883	1.45724	-1.61409	3.27598	-1.06324	2.78144	-1.47229	3.2247	3.37818	-1.61409
AURKA	Aurora kinase A	O14965	YES	YES	VEFTFPDFVTEGAR	344	-1.12386	1.32226	-1.42134	2.83534	-1.46254	3.15675	-1.23115	2.90013	4.06483	-1.42134
AURKA	Aurora kinase A	O14965	YES	YES	VYLILEYAPLGTVYR	206	-1.57078	1.0351	-2.26535	2.61693	-2.21376	2.49294	-2.3149	4.00824	2.0662	-2.26535
AURKA	Aurora kinase A	O14965	YES	YES	TATYITELANALSYCHSK	233	-0.830387	1.02317	-1.4659	2.11042	-1.66882	2.64551	-2.22939	2.08768	2.65236	-1.4659
AURKA	Aurora kinase A	O14965	YES	YES	ISRVEFTFPDFVTEGAR	341	-0.626616	0.9073	-1.91144	1.68768	-1.65928	4.75411	-1.53263	4.67242	3.90763	-1.91144
AURKA	Aurora kinase A	O14965	YES	YES	HNPSQRPMLR	366	1.52132	0.519175	-0.367894	0.0834675	-0.122625	0.0271705	-1.60574	0.511128	0.251485	-0.367894
AURKA	Aurora kinase A	O14965	YES	YES	SKQPLPSAPENNPEEELASK	98	-0.696421	0.503446	-0.525074	0.315208	-0.572028	0.369812	-0.69594	0.544324	0.0114319	-0.525074
AURKA	Aurora kinase A	O14965	YES	YES	VLVTQQFPCQNPLPVNSGQAQR	25	-0.206772	0.442495	0.0547043	0.140904	-0.0442813	0.163148	-0.26119	0.349203	0.0706842	0.0547043
AURKA	Aurora kinase A	O14965	YES	YES	LYGYFHDATR	196	-0.839305	0.40036	-2.76799	2.88407	-1.975	2.21968	-2.32106	2.45093	2.41409	-2.76799
AURKA	Aurora kinase A	O14965	YES	YES	IADFGWSVHAPSSR	272	-0.661075	0.339484	-0.534832	0.338234	-1.57641	1.1819	-1.24836	1.01724	0.982515	-0.534832
AURKA	Aurora kinase A	O14965	YES	YES	RVLVTQQFPCQNPLPVNSGQAQR	24	-0.731748	0.327696	-1.80666	1.57844	0.0289135	0.0221269	-0.760261	0.471631	0.372944	-1.80666
AURKA	Aurora kinase A	O14965	YES	YES	QLQATSVPHPVSRPLNNTQK	78	-0.20791	0.273467	-0.0937295	0.106999	0.073978	0.110591	-0.0797534	0.105434	0.493452	-0.0937295
AURKA	Aurora kinase A	O14965	YES	YES	LVSSHKPVQNQK	64	0.233324	0.252056	-0.131163	0.137369	-0.0634944	0.0639206	-0.143562	0.162202	0.184751	-0.131163
AURKA	Aurora kinase A	O14965	YES	YES	RTTLCGTLDYLPPEMIEGR	286	-0.283104	0.162453	0.373128	0.317731	-0.103946	0.0554713	-0.686624	0.390239	0.15779	0.373128
AURKA	Aurora kinase A	O14965	YES	YES	SKENCISGPVK	4	0.0427087	0.0507031	-0.143237	0.171685	0.207555	0.306751	-0.142898	0.172709	0.0810758	-0.143237
AURKA	Aurora kinase A	O14965	YES	YES	FGNVYLAR	144	-0.0588725	0.0211899	-2.30758	1.30679	-2.02633	1.61668	-1.87622	1.12024	1.96472	-2.30758
GAK	Cyclin-G-associated kinase	O14976	YES	YES	HPGHYAVYNLSPR	446	1.39767	1.90699	-0.063987	0.0287235	0.921594	0.757385	0.400912	0.263061	0.991773	-0.063987
GAK	Cyclin-G-associated kinase	O14976	YES	YES	IFYQTCR	151	-0.522315	0.794436	-1.50359	5.50567	-2.14854	5.19775	-2.34517	5.7154	2.88149	-1.50359
GAK	Cyclin-G-associated kinase	O14976	YES	YES	GPLSCDTVLK	141	-0.6862	0.794339	-1.29067	4.29748	-0.900649	1.27463	-1.97457	4.62334	3.09997	-1.29067
GAK	Cyclin-G-associated kinase	O14976	YES	YES	LSIAEVVHQLQEIAAAR	304	-0.450711	0.768375	-0.99473	4.28106	-1.30846	5.68683	-1.2801	5.28851	5.69769	-0.99473
GAK	Cyclin-G-associated kinase	O14976	YES	YES	ALVEEEITR	212	-0.655183	0.767488	0.101364	0.221096	0.152862	0.497555	0.106439	0.294705	0.280094	0.101364
GAK	Cyclin-G-associated kinase	O14976	YES	YES	VSENDFEDLLSNQGFSSR	1175	0.162358	0.732985	0.210256	0.843843	0.156943	0.513214	0.194836	0.795693	0.191064	0.210256
GAK	Cyclin-G-associated kinase	O14976	YES	YES	ILFSSREEQQDILSK	734	0.80462	0.724	-0.0418425	0.0354154	0.00679744	0.00511079	-0.202169	0.144857	0.350057	-0.0418425
GAK	Cyclin-G-associated kinase	O14976	YES	YES	WTPVGMADLVAPEQVK	1249	0.780014	0.698311	0.906325	1.05261	1.18456	1.43912	0.524436	0.395128	0.419933	0.906325
GAK	Cyclin-G-associated kinase	O14976	YES	YES	FLHTLDWQEEKEAETGAENASSK	791	0.786541	0.678634	-0.253214	0.144404	-1.61335	0.510865	-1.19869	0.98659	0.295794	-0.253214
GAK	Cyclin-G-associated kinase	O14976	YES	YES	LCDFGSATTISHYPDYSWSAQR	189	-1.06658	0.633905	-1.62624	4.00075	-3.11185	4.16205	-3.47555	4.72713	6.69911	-1.62624
GAK	Cyclin-G-associated kinase	O14976	YES	YES	DQSDFVGQTVELGELR	24	-1.13558	0.620679	-0.877134	1.19288	-1.12423	0.556568	-0.733442	0.485953	1.21967	-0.877134
GAK	Cyclin-G-associated kinase	O14976	YES	YES	IAVMSFPAEGVESALKNNIEDVR	417	-1.00359	0.607557	-0.255869	0.159479	0.174308	0.159631	0.0117175	0.0100499	0.038069	-0.255869
GAK	Cyclin-G-associated kinase	O14976	YES	YES	DLKVENLLLSNQGTIK	173	-0.501206	0.577843	-0.820259	2.80441	-1.34477	4.27342	-1.25503	4.03764	3.22253	-0.820259
GAK	Cyclin-G-associated kinase	O14976	YES	YES	AMLQVNPEER	294	-0.392767	0.555474	-0.980385	4.30426	-1.23822	4.8474	-1.22878	5.2472	5.3508	-0.980385
GAK	Cyclin-G-associated kinase	O14976	YES	YES	VLAEGGFAFVYEAQDVGSGR	45	-0.809258	0.549657	-1.60359	2.33548	-2.72989	2.7664	-2.41405	3.17031	2.87235	-1.60359
GAK	Cyclin-G-associated kinase	O14976	YES	YES	SLLQSALDFLAGPGSLGGASGR	2	0.456678	0.544078	1.05635	1.61107	0.471803	0.55384	0.806958	1.03943	0.178205	1.05635
GAK	Cyclin-G-associated kinase	O14976	YES	YES	ACTQPRPNYASNFSVIGAR	1141	0.290659	0.498227	0.251419	0.501187	0.469066	1.1326	0.3357	0.714133	1.85877	0.251419
GAK	Cyclin-G-associated kinase	O14976	YES	YES	VENLLLSNQGTIK	176	0.774921	0.470229	-0.610245	0.508987	-0.911494	0.855893	-0.315295	0.22718	0.187827	-0.610245
GAK	Cyclin-G-associated kinase	O14976	YES	YES	LLDWIEGK	1220	0.239747	0.446362	-0.350965	0.713689	-0.195772	0.428712	-0.0916117	0.18352	0.495995	-0.350965
GAK	Cyclin-G-associated kinase	O14976	YES	YES	APSFAQKPK	1166	0.484167	0.382248	0.48085	0.39461	1.12281	1.36533	0.847832	0.953339	0.634783	0.48085
GAK	Cyclin-G-associated kinase	O14976	YES	YES	AVVMTPVPLFSK	579	0.0987815	0.374976	-0.0255441	0.0593298	0.0431274	0.123361	0.238682	1.21398	0.539048	-0.0255441
GAK	Cyclin-G-associated kinase	O14976	YES	YES	AASAVAVCSFLCFCR	513	0.0885295	0.356487	0.0129634	0.0362947	0.219498	1.28882	0.149854	0.699609	0.765133	0.0129634
GAK	Cyclin-G-associated kinase	O14976	YES	YES	IAVMSFPAEGVESALK	417	0.23687	0.333026	0.167366	0.224016	0.354313	0.5576	0.401348	0.658756	0.576983	0.167366
GAK	Cyclin-G-associated kinase	O14976	YES	YES	CPPGIWPSHKR	544	0.321602	0.312895	0.40928	0.489853	1.20742	2.17207	0.533588	0.313039	0.394068	0.40928
GAK	Cyclin-G-associated kinase	O14976	YES	YES	MSLLQSALDFLAGPGSLGGASGR	1	-0.299633	0.288704	0.0275351	0.0182593	-0.283816	0.256341	0.02952	0.025965	0.105151	0.0275351
GAK	Cyclin-G-associated kinase	O14976	YES	YES	LLDWIEGKER	1220	0.278566	0.242146	-0.298957	0.180453	0.417468	0.424824	-0.236433	0.174505	0.362905	-0.298957
GAK	Cyclin-G-associated kinase	O14976	YES	YES	YIEYMCDMVAEEPITPHSKPILVR	555	0.133941	0.235773	-0.290805	0.409128	-0.195634	0.303042	-0.171173	0.295642	0.0884656	-0.290805
GAK	Cyclin-G-associated kinase	O14976	YES	YES	AIIQEVCFMKK	81	0.369263	0.231184	-0.923948	1.11225	-0.751529	0.712518	-0.857947	0.957954	0.598043	-0.923948
GAK	Cyclin-G-associated kinase	O14976	YES	YES	EEQQDILSK	740	-0.453198	0.222448	-0.129835	0.0778748	1.23146	1.1106	-0.0129121	0.00608819	0.0609993	-0.129835
GAK	Cyclin-G-associated kinase	O14976	YES	YES	LFSTAEAAVYMFSMKR	528	0.148132	0.215822	-0.140268	0.191272	0.106486	0.158992	0.0217457	0.0279146	0.290473	-0.140268
GAK	Cyclin-G-associated kinase	O14976	YES	YES	EAPPWENSSMR	718	0.284842	0.205569	-0.602521	0.480035	-0.339292	0.224173	-0.69429	0.46416	0.00998142	-0.602521
GAK	Cyclin-G-associated kinase	O14976	YES	YES	DFKIEDGK	620	-0.253487	0.204103	-1.3725	2.60692	-0.503873	0.574294	-1.16265	1.89624	1.7535	-1.3725
GAK	Cyclin-G-associated kinase	O14976	YES	YES	WTPVGMADLVAPEQVKK	1249	0.106665	0.145241	-0.323986	0.546666	-0.0428363	0.0509901	-0.0472601	0.0601586	0.0261902	-0.323986
GAK	Cyclin-G-associated kinase	O14976	YES	YES	RVLAEGGFAFVYEAQDVGSGR	44	-0.132261	0.140123	-0.63377	1.1339	-0.966647	1.48568	-2.78177	2.33134	2.70687	-0.63377
GAK	Cyclin-G-associated kinase	O14976	YES	YES	GDLDISYITSR	406	0.0292532	0.135307	0.0459942	0.163582	0.0865759	0.6357	0.0516122	0.263975	0.978211	0.0459942
GAK	Cyclin-G-associated kinase	O14976	YES	YES	VSECGWAAR	469	0.0681762	0.131941	-0.0534124	0.0968659	0.0703768	0.228806	0.134845	0.340817	0.955878	-0.0534124
GAK	Cyclin-G-associated kinase	O14976	YES	YES	SGCRPFCEVYVGDER	593	0.0508454	0.107173	-0.392531	0.840218	-0.381062	0.494163	-0.0578136	0.114124	0.379187	-0.392531
GAK	Cyclin-G-associated kinase	O14976	YES	YES	ALLSTLHTVLWDGESR	1233	-0.0505776	0.0882977	0.135047	0.281469	0.129696	0.322238	-0.112975	0.236535	0.38002	0.135047
GAK	Cyclin-G-associated kinase	O14976	YES	YES	NVCVVHCMDGR	502	-0.0518584	0.0659709	-0.248775	0.478959	-0.329739	0.687351	-0.244188	0.70196	0.0398911	-0.248775
GAK	Cyclin-G-associated kinase	O14976	YES	YES	GPPPPVGPAGSGYSGGLALAEYDQPYGGFLDILR	346	0.0502948	0.0628987	0.0826437	0.119074	-0.0310045	0.0339473	-0.632885	0.647962	0.0929753	0.0826437
GAK	Cyclin-G-associated kinase	O14976	YES	YES	MFQIQFHTGFVPR	664	0.0208986	0.0619342	-0.0273924	0.0796734	0.0574845	0.216861	0.0124007	0.0379729	0.381986	-0.0273924
GAK	Cyclin-G-associated kinase	O14976	YES	YES	LCDFGSATTISHYPDYSWSAQRR	189	-0.0491321	0.0401352	0.0872741	0.0619249	-0.298427	0.283641	0.42402	0.422821	1.19196	0.0872741
GAK	Cyclin-G-associated kinase	O14976	YES	YES	VLAEGGFAFVYEAQDVGSGREYALK	45	0.0831069	0.0385576	-0.101975	0.0584743	-0.0830544	0.0649525	0.175204	0.112517	0.519917	-0.101975
GAK	Cyclin-G-associated kinase	O14976	YES	YES	LFTNLKDTSSK	385	-0.0318246	0.037251	0.212952	0.393878	0.0539649	0.0736782	-0.0559313	0.0543805	0.208934	0.212952
GAK	Cyclin-G-associated kinase	O14976	YES	YES	RAPHLHTLYNICR	478	0.0196032	0.0312284	0.259491	0.523216	0.275656	0.565591	0.118772	0.176312	0.659518	0.259491
GAK	Cyclin-G-associated kinase	O14976	YES	YES	AIIQEVCFMK	81	0.0715663	0.0190116	-0.835406	0.341427	-1.43772	0.717433	-1.14852	0.450716	0.96749	-0.835406
GAK	Cyclin-G-associated kinase	O14976	YES	YES	VIQSVANYAK	396	0.00869596	0.0181811	0.00954586	0.015556	0.0808603	0.185287	-0.0585557	0.108669	0.339111	0.00954586
GAK	Cyclin-G-associated kinase	O14976	YES	YES	SPITELLEQNGGYGSATLSR	326	-0.014859	0.00880347	-2.37597	1.51608	-1.54277	0.727408	-1.29697	1.47265	1.11893	-2.37597
PIP5K1B	Phosphatidylinositol 4-phosphate 5-kinase type-1 beta	O14986	NO	YES	RCNSIAALKATSQEIVSSISQEWK	410	0.544982	0.142165	0.477878	0.100495	1.44862	0.500947	-1.32449	0.315575	0.0134646	0.477878
MAST4	Microtubule-associated serine/threonine-protein kinase 4	O15021	YES	YES	SGPDVFPATPGSQNK	2245	-2.31795	1.7903	0.271507	0.377186	0.248496	0.352136	-0.318559	0.241214	0.0199181	0.271507
MAST4	Microtubule-associated serine/threonine-protein kinase 4	O15021	YES	YES	GAERPAAGVGKGFPEAR	2402	0.420546	0.440032	0.526647	0.352022	0.863097	1.19179	0.911645	1.26059	0.152193	0.526647
MAST4	Microtubule-associated serine/threonine-protein kinase 4	O15021	YES	YES	AAGGMLELPAPSNR	2487	-0.600577	0.407121	0.146485	0.130494	-0.0705734	0.042054	0.319381	0.230916	0.187025	0.146485
MAST4	Microtubule-associated serine/threonine-protein kinase 4	O15021	YES	YES	GEKVSEAPEPVPR	2	0.148163	0.198517	-0.0277569	0.0304548	0.210822	0.314539	0.209853	0.317837	0.00437734	-0.0277569
MAST4	Microtubule-associated serine/threonine-protein kinase 4	O15021	YES	YES	SHGPGSDLENFALFK	1554	-0.296849	0.197365	0.366024	0.268425	0.274188	0.190476	0.339677	0.18134	0.0497288	0.366024
MAST4	Microtubule-associated serine/threonine-protein kinase 4	O15021	YES	YES	ALSVTATVGETK	2550	-0.277885	0.142704	-0.284265	0.154211	0.144068	0.079897	-0.323164	0.179708	0.0896256	-0.284265
MAST4	Microtubule-associated serine/threonine-protein kinase 4	O15021	YES	YES	SPGTVMESNPQQR	1909	0.154759	0.0980949	-0.755249	0.722694	-0.141955	0.0891493	-0.436069	0.354574	0.203352	-0.755249
MAST4	Microtubule-associated serine/threonine-protein kinase 4	O15021	YES	YES	SLSCSSSFPETR	2458	0.103002	0.0650898	0.348947	0.145805	0.361742	0.18484	-0.702661	0.374691	0.842877	0.348947
MAST4	Microtubule-associated serine/threonine-protein kinase 4	O15021	YES	YES	LANIDYLR	1683	0.167698	0.0493796	1.15265	0.773079	-0.328612	0.199885	0.723313	0.372143	0.0471707	1.15265
MAST4	Microtubule-associated serine/threonine-protein kinase 4	O15021	YES	YES	SLDWNSLLR	845	0.0516234	0.0434708	0.00692649	0.0066726	0.20478	0.251215	-0.584378	0.536693	0.697627	0.00692649
MAST4	Microtubule-associated serine/threonine-protein kinase 4	O15021	YES	YES	LLTCLGQNLHSPDLARPR	1937	0.0654975	0.0386219	0.24727	0.157559	0.578677	0.402503	0.243883	0.135802	0.0532482	0.24727
CHUK	Inhibitor of nuclear factor kappa-B kinase subunit alpha	O15111	YES	YES	WCHEIQIMK	58	4.59917	1.81057	0.489361	0.0869368	-1.68734	0.540714	-0.0666367	0.0135797	0.540843	0.489361
CHUK	Inhibitor of nuclear factor kappa-B kinase subunit alpha	O15111	YES	YES	IVHILNMTSAK	312	0.991887	1.22155	1.02954	1.18349	0.792935	0.836266	0.354837	0.289376	0.400384	1.02954
CHUK	Inhibitor of nuclear factor kappa-B kinase subunit alpha	O15111	YES	YES	KLNHANVVK	67	0.872176	1.07293	0.773229	0.876734	0.744653	0.947493	0.795245	1.02491	0.805383	0.773229
CHUK	Inhibitor of nuclear factor kappa-B kinase subunit alpha	O15111	YES	YES	SCRLELSTK	45	0.968998	0.666804	0.127693	0.0548902	0.239956	0.11584	-0.850588	0.829703	0.541021	0.127693
CHUK	Inhibitor of nuclear factor kappa-B kinase subunit alpha	O15111	YES	YES	ERWCHEIQIMK	56	-0.527034	0.653929	-0.108548	0.0639492	-0.0835952	0.0965576	-0.695464	0.530906	1.6913	-0.108548
CHUK	Inhibitor of nuclear factor kappa-B kinase subunit alpha	O15111	YES	YES	CIFACEEMSGEVR	241	0.176923	0.579912	0.0858966	0.222334	0.369928	1.95907	0.339145	1.34975	1.65092	0.0858966
CHUK	Inhibitor of nuclear factor kappa-B kinase subunit alpha	O15111	YES	YES	IQLPIIQLR	416	0.114478	0.536064	0.13425	0.534668	0.126457	0.664206	0.154905	0.791809	0.305559	0.13425
CHUK	Inhibitor of nuclear factor kappa-B kinase subunit alpha	O15111	YES	YES	KLLNKPENCCGLK	105	-0.511602	0.53263	-0.181117	0.1054	-0.513447	0.711412	-0.459001	0.517297	0.0278627	-0.181117
CHUK	Inhibitor of nuclear factor kappa-B kinase subunit alpha	O15111	YES	YES	IISFLLPPDESLHSLQSR	323	0.160338	0.511681	0.0475968	0.0946657	0.0628793	0.132075	-0.232254	0.606414	0.0464577	0.0475968
CHUK	Inhibitor of nuclear factor kappa-B kinase subunit alpha	O15111	YES	YES	KPASQCVLDGVR	366	0.922678	0.462745	0.648968	0.333819	1.32064	0.945266	0.758238	0.40642	0.195817	0.648968
CHUK	Inhibitor of nuclear factor kappa-B kinase subunit alpha	O15111	YES	YES	SLSDCVNYIVQDSK	402	-0.211525	0.44626	-0.301024	0.575888	0.000701651	0.00150031	-0.359876	0.776576	0.810402	-0.301024
CHUK	Inhibitor of nuclear factor kappa-B kinase subunit alpha	O15111	YES	YES	CFVLMDHILNLK	300	-0.364326	0.444541	-0.538512	0.583462	0.171098	0.207133	-0.0453312	0.0419072	0.105256	-0.538512
CHUK	Inhibitor of nuclear factor kappa-B kinase subunit alpha	O15111	YES	YES	KVWAEAVHYVSGLKEDYSR	425	0.517017	0.430216	0.714489	0.656554	0.60841	0.529493	0.503797	0.407258	0.2635	0.714489
CHUK	Inhibitor of nuclear factor kappa-B kinase subunit alpha	O15111	YES	YES	MERPPGLRPGAGGPWEMR	1	-0.266648	0.35702	-0.552245	0.537344	0.235266	0.62407	-0.125552	0.226162	0.162503	-0.552245
CHUK	Inhibitor of nuclear factor kappa-B kinase subunit alpha	O15111	YES	YES	IIVHTVQSQDR	589	0.155991	0.284878	-0.0492761	0.0779489	-0.172495	0.438842	0.0452112	0.0962717	0.307817	-0.0492761
CHUK	Inhibitor of nuclear factor kappa-B kinase subunit alpha	O15111	YES	YES	GGPVDLTLKQPR	288	-0.0702109	0.202253	0.143273	0.457153	0.152068	0.661117	0.0201468	0.0627411	0.109361	0.143273
CHUK	Inhibitor of nuclear factor kappa-B kinase subunit alpha	O15111	YES	YES	LGTGGFGNVCLYQHR	21	0.048675	0.190869	0.0325543	0.103213	0.158838	0.988789	0.0330089	0.126855	0.0619593	0.0325543
CHUK	Inhibitor of nuclear factor kappa-B kinase subunit alpha	O15111	YES	YES	AAMLSLLR	450	-0.0667151	0.182208	-0.165763	0.626144	-0.220315	0.863566	-0.076143	0.246552	0.908466	-0.165763
CHUK	Inhibitor of nuclear factor kappa-B kinase subunit alpha	O15111	YES	YES	QGDLMESLEQR	553	0.143247	0.177205	0.121883	0.124642	0.390755	0.624548	0.260895	0.351188	0.524687	0.121883
CHUK	Inhibitor of nuclear factor kappa-B kinase subunit alpha	O15111	YES	YES	GCDSYMVYLFDK	378	-0.264044	0.174531	0.220828	0.178942	0.227697	0.149404	0.145282	0.110445	0.212987	0.220828
CHUK	Inhibitor of nuclear factor kappa-B kinase subunit alpha	O15111	YES	YES	ESQILSLLSDIGSGIR	118	0.0376446	0.119694	0.0340737	0.0953769	0.145435	0.751091	0.0899465	0.377125	0.234968	0.0340737
CHUK	Inhibitor of nuclear factor kappa-B kinase subunit alpha	O15111	YES	YES	HRPSDHSYSDSTEMVK	573	0.0766765	0.078269	0.31451	0.379487	0.299642	0.441267	0.142568	0.206614	0.0326313	0.31451
CHUK	Inhibitor of nuclear factor kappa-B kinase subunit alpha	O15111	YES	YES	EADNTVMFMQGK	634	0.0423614	0.0769683	-0.4589	0.395691	-1.32797	1.15227	-0.876091	0.518044	0.376981	-0.4589
CHUK	Inhibitor of nuclear factor kappa-B kinase subunit alpha	O15111	YES	YES	YSEQMTYGISSEK	494	-0.0807727	0.0690365	-0.761076	1.00619	-0.56025	0.550523	-0.380769	0.501492	0.473448	-0.761076
CHUK	Inhibitor of nuclear factor kappa-B kinase subunit alpha	O15111	YES	YES	VEVALSNIK	625	-0.0924468	0.058702	-0.289542	0.31596	-0.113189	0.0962033	0.0864477	0.0805142	0.673388	-0.289542
CHUK	Inhibitor of nuclear factor kappa-B kinase subunit alpha	O15111	YES	YES	LLNKPENCCGLK	106	-0.00564266	0.00943489	0.0198277	0.0322318	0.108319	0.258117	0.139551	0.323285	0.338137	0.0198277
CHUK	Inhibitor of nuclear factor kappa-B kinase subunit alpha	O15111	YES	YES	DLKPENIVLQDVGGK	144	-0.00109223	0.00437314	-0.0395782	0.175598	-0.139303	0.708248	-0.147382	0.636755	1.31495	-0.0395782
TRIM24	Transcription intermediary factor 1-alpha	O15164	YES	NO	QESDEESRPQNANYPR	742	-0.96293	1.68757	-0.470555	0.628992	-0.549847	0.784394	-0.351209	0.53427	0.88616	-0.470555
TRIM24	Transcription intermediary factor 1-alpha	O15164	YES	NO	WAVSSGSSTALLYSK	365	0.533486	1.35084	0.352583	0.744954	0.172438	0.275039	0.24564	0.528228	0.595476	0.352583
TRIM24	Transcription intermediary factor 1-alpha	O15164	YES	NO	IIEVNQNQK	295	0.270711	0.886981	-0.00297034	0.00290338	0.216858	0.47281	-0.0209363	0.0353357	1.25298	-0.00297034
TRIM24	Transcription intermediary factor 1-alpha	O15164	YES	NO	DTTEVPSSTVEK	147	-1.26753	0.652564	0.0799574	0.0480692	-0.0897872	0.0613606	0.267551	0.2333	0.50307	0.0799574
TRIM24	Transcription intermediary factor 1-alpha	O15164	YES	NO	CLPAPQR	81	1.63218	0.641007	1.63218	0.634657	1.37508	0.510269	1.3862	0.508682	0.546918	1.63218
TRIM24	Transcription intermediary factor 1-alpha	O15164	YES	NO	CPVCSQECAER	127	-0.409662	0.589547	-0.152328	0.176826	-0.0293692	0.027763	-0.300271	0.184041	0.153614	-0.152328
TRIM24	Transcription intermediary factor 1-alpha	O15164	YES	NO	LLPCLHSFCQR	70	0.109484	0.478624	0.0234984	0.0664596	-0.0227618	0.0679693	-0.0326292	0.11985	0.0717969	0.0234984
TRIM24	Transcription intermediary factor 1-alpha	O15164	YES	NO	FPTQISLAQLR	459	0.203726	0.452656	0.0575015	0.0935807	-0.372571	0.334864	-0.0223989	0.0407822	0.147919	0.0575015
TRIM24	Transcription intermediary factor 1-alpha	O15164	YES	NO	LENYFEELLK	993	-0.349916	0.376948	-0.860468	0.946356	-0.321851	0.506927	0.263822	0.373174	0.480475	-0.860468
TRIM24	Transcription intermediary factor 1-alpha	O15164	YES	NO	VIIDTLITK	268	0.0785719	0.375445	0.0487369	0.211026	0.0296169	0.152304	0.0543617	0.229176	0.157693	0.0487369
TRIM24	Transcription intermediary factor 1-alpha	O15164	YES	NO	VAIFTLMVEINKK	311	0.595135	0.352386	0.686629	0.466872	-0.175718	0.072987	0.523064	0.295219	0.414755	0.686629
TRIM24	Transcription intermediary factor 1-alpha	O15164	YES	NO	LMQQQQEVAGLSK	342	0.1513	0.280915	-0.12324	0.193949	0.0790203	0.160924	0.00881633	0.0155869	0.0322435	-0.12324
TRIM24	Transcription intermediary factor 1-alpha	O15164	YES	NO	LNLLDTCAVCHQNIQSR	50	0.0885271	0.256667	-0.0290035	0.0625888	-0.0367661	0.111627	-0.0155	0.0418414	0.345947	-0.0290035
TRIM24	Transcription intermediary factor 1-alpha	O15164	YES	NO	YQFIEEAFQNQK	256	0.0833556	0.203029	-0.00601766	0.0108196	0.140441	0.491701	-0.0528488	0.105553	0.230666	-0.00601766
TRIM24	Transcription intermediary factor 1-alpha	O15164	YES	NO	LQEDYSMYSKPEDFVADFR	952	-0.330804	0.199183	-0.0786126	0.0504423	-0.525999	0.43551	-0.518931	0.299272	0.458566	-0.0786126
TRIM24	Transcription intermediary factor 1-alpha	O15164	YES	NO	FTGNQIQNR	286	0.565093	0.198925	0.933611	0.460656	0.106029	0.038863	-0.23022	0.0752642	0.185729	0.933611
TRIM24	Transcription intermediary factor 1-alpha	O15164	YES	NO	MEVAVEK	1	-0.0973128	0.186537	-0.473333	0.892315	-0.0250029	0.0467076	0.127077	0.262015	0.122758	-0.473333
TRIM24	Transcription intermediary factor 1-alpha	O15164	YES	NO	SIEERQLLK	1042	-0.23831	0.138573	0.126382	0.0867748	-0.185616	0.12222	0.427422	0.283027	0.123507	0.126382
TRIM24	Transcription intermediary factor 1-alpha	O15164	YES	NO	SPLHVGETRK	811	-0.271767	0.135695	-0.894507	0.694132	-0.837096	0.667548	-0.871384	0.594503	0.112704	-0.894507
TRIM24	Transcription intermediary factor 1-alpha	O15164	YES	NO	ALLHQLESLAK	326	0.0811032	0.0812832	0.384131	0.527493	0.451315	0.674986	0.517612	0.790037	0.217989	0.384131
TRIM24	Transcription intermediary factor 1-alpha	O15164	YES	NO	AVAAAAAASAAASGGPSAAPSGENEAESR	8	0.0589129	0.0479414	0.142098	0.173081	-0.23557	0.279421	-0.683337	1.25109	0.351115	0.142098
TRIM24	Transcription intermediary factor 1-alpha	O15164	YES	NO	SILTSLLLNSSQSSTSEETVLR	758	-0.0152614	0.033636	0.0700142	0.162042	-0.0209628	0.0534146	-0.0867187	0.257456	0.210036	0.0700142
PDPK1	3-phosphoinositide-dependent protein kinase 1	O15530	YES	YES	ILGEGSFSTVVLAR	87	-1.93816	6.70141	-1.97139	7.06202	-1.90974	7.44213	-1.89279	7.318	7.50065	-1.97139
PDPK1	3-phosphoinositide-dependent protein kinase 1	O15530	YES	YES	LLVLDATK	316	-1.99413	3.4512	-2.32683	1.74722	-2.4812	2.91036	-2.1115	2.08414	3.09526	-2.32683
PDPK1	3-phosphoinositide-dependent protein kinase 1	O15530	YES	YES	KIGSFDETCTR	173	-2.59481	3.34708	-1.56877	2.85125	-1.75923	2.53683	-2.12464	3.28528	2.8885	-1.56877
PDPK1	3-phosphoinositide-dependent protein kinase 1	O15530	YES	YES	FYTAEIVSALEYLHGK	184	-1.29357	3.30056	-1.64323	4.28576	-1.28039	4.14543	-1.51145	3.71802	4.51463	-1.64323
PDPK1	3-phosphoinositide-dependent protein kinase 1	O15530	YES	YES	ANSFVGTAQYVSPELLTEK	239	-3.38514	1.9945	-2.47321	1.36723	-1.98259	0.930558	-0.176545	0.0746425	0.497066	-2.47321
PDPK1	3-phosphoinositide-dependent protein kinase 1	O15530	YES	YES	IGSFDETCTR	174	-1.47748	1.69968	-1.85213	1.69368	-1.83185	2.34584	-1.80609	2.42127	1.61076	-1.85213
PDPK1	3-phosphoinositide-dependent protein kinase 1	O15530	YES	YES	LGCEEMEGYGPLK	325	-1.59999	1.46302	-1.75215	1.74188	-0.831329	1.94514	-0.856523	2.65615	2.06363	-1.75215
PDPK1	3-phosphoinositide-dependent protein kinase 1	O15530	YES	YES	QLLLTEGPHLYYVDPVNK	475	-1.23889	1.37356	-0.113108	0.136019	-0.0385315	0.0333224	-0.543032	0.576123	0.190652	-0.113108
PDPK1	3-phosphoinositide-dependent protein kinase 1	O15530	YES	YES	QGPAMDGTAAEPRPGAGSLQHAQPPPQPR	47	-0.977548	0.712818	-0.383493	0.190023	0.345628	0.272693	-0.360086	0.199318	0.100973	-0.383493
PDPK1	3-phosphoinositide-dependent protein kinase 1	O15530	YES	YES	TTSQLYDAVPIQSSVVLCSCPSPSMVR	4	-0.835825	0.501188	0.284869	0.288732	-0.80911	0.404155	0.814759	1.53163	2.02887	0.284869
PDPK1	3-phosphoinositide-dependent protein kinase 1	O15530	YES	YES	TQTESSTPPGIPGGSR	31	-0.0685892	0.313721	0.0682852	0.335127	-0.0490727	0.199655	-0.020478	0.106374	0.454126	0.0682852
PDPK1	3-phosphoinositide-dependent protein kinase 1	O15530	YES	YES	DLKPENILLNEDMHIQITDFGTAK	205	-0.151325	0.137806	-1.37024	1.24749	-0.318565	0.236484	-1.3294	2.68553	1.26579	-1.37024
PDPK1	3-phosphoinositide-dependent protein kinase 1	O15530	YES	YES	AGNEYLIFQK	284	-0.597464	0.113307	-0.58996	0.108539	-0.294697	0.0527313	0.3633	0.0854149	0.0526301	-0.58996
PAPSS1	Bifunctional 3'-phosphoadenosine 5'-phosphosulfate synthase 1	O43252	NO	YES	MEIPGSLCK	1	0.441152	1.2714	0.129241	0.240065	0.401752	2.33091	0.393122	0.68575	3.20375	0.129241
PAPSS1	Bifunctional 3'-phosphoadenosine 5'-phosphosulfate synthase 1	O43252	NO	YES	FKDMNADAVFAFQLR	407	0.673253	0.891622	0.529106	0.314779	0.702729	0.499388	0.92458	0.834771	0.877253	0.529106
PAPSS1	Bifunctional 3'-phosphoadenosine 5'-phosphosulfate synthase 1	O43252	NO	YES	ATNVTYQAHHVSR	25	0.165367	0.65529	0.109086	0.425144	0.0699178	0.254065	0.106559	0.310362	0.203897	0.109086
PAPSS1	Bifunctional 3'-phosphoadenosine 5'-phosphosulfate synthase 1	O43252	NO	YES	GCTVWLTGLSGAGK	52	0.133876	0.604377	0.0796307	0.529738	0.223454	1.40782	0.335691	2.6562	2.745	0.0796307
PAPSS1	Bifunctional 3'-phosphoadenosine 5'-phosphosulfate synthase 1	O43252	NO	YES	NLGFSPEDREENVR	98	-0.191354	0.586885	0.0229939	0.0581977	0.0761648	0.196394	0.145098	0.457058	0.869519	0.0229939
PAPSS1	Bifunctional 3'-phosphoadenosine 5'-phosphosulfate synthase 1	O43252	NO	YES	TDSCDVNDCVQQVVELLQER	204	-0.347493	0.54444	-0.149163	0.206657	-0.0150479	0.0238739	0.226982	0.428427	0.1119	-0.149163
PAPSS1	Bifunctional 3'-phosphoadenosine 5'-phosphosulfate synthase 1	O43252	NO	YES	VLTMAPGLITLEIVPFR	545	-0.325667	0.493838	-0.0411738	0.0458422	-0.549427	0.802322	-0.589578	0.878178	0.266484	-0.0411738
PAPSS1	Bifunctional 3'-phosphoadenosine 5'-phosphosulfate synthase 1	O43252	NO	YES	LFADAGLVCITSFISPYTQDR	119	0.144365	0.3807	0.116431	0.318539	0.16225	0.546666	0.284604	1.30464	0.96469	0.116431
PAPSS1	Bifunctional 3'-phosphoadenosine 5'-phosphosulfate synthase 1	O43252	NO	YES	MEIPGSLCKK	1	0.109906	0.346208	-0.167134	0.564371	0.00810151	0.0380258	-0.145186	0.239056	0.303928	-0.167134
PAPSS1	Bifunctional 3'-phosphoadenosine 5'-phosphosulfate synthase 1	O43252	NO	YES	QIHEGASLPFFEVFVDAPLHVCEQR	144	-0.115238	0.280269	-0.0832416	0.19947	-0.110992	0.262026	-0.1365	0.293794	0.137972	-0.0832416
PAPSS1	Bifunctional 3'-phosphoadenosine 5'-phosphosulfate synthase 1	O43252	NO	YES	LSNNAQNWGMQR	13	0.0915803	0.279147	-0.0294065	0.0726711	0.115712	0.642498	0.111446	0.526696	0.861373	-0.0294065
PAPSS1	Bifunctional 3'-phosphoadenosine 5'-phosphosulfate synthase 1	O43252	NO	YES	MVMEQGDWLIGGDLQVLDRVYWNDGLDQYR	368	0.300479	0.27035	0.32276	0.306334	0.0182143	0.0105075	0.0459661	0.0307855	0.456469	0.32276
PAPSS1	Bifunctional 3'-phosphoadenosine 5'-phosphosulfate synthase 1	O43252	NO	YES	MEIPGSLCKKVK	1	0.0972022	0.210259	-0.00732089	0.0149231	0.118906	0.374852	0.0344553	0.0932224	0.162621	-0.00732089
PAPSS1	Bifunctional 3'-phosphoadenosine 5'-phosphosulfate synthase 1	O43252	NO	YES	TTVSMALEEYLVCHGIPCYTLDGDNIR	66	-0.0608894	0.18876	0.07387	0.115299	-0.121261	0.509649	-0.0911295	0.300432	0.0503226	0.07387
PAPSS1	Bifunctional 3'-phosphoadenosine 5'-phosphosulfate synthase 1	O43252	NO	YES	GFTGIDSEYEKPEAPELVLK	184	0.667312	0.178916	-0.264368	0.0647383	-1.32776	0.565248	-1.38725	0.566068	0.388852	-0.264368
PAPSS1	Bifunctional 3'-phosphoadenosine 5'-phosphosulfate synthase 1	O43252	NO	YES	NLGFSPEDREENVRR	98	0.0508031	0.109745	-0.0637703	0.160791	-0.0417457	0.0979725	0.13269	0.386467	0.248549	-0.0637703
PAPSS1	Bifunctional 3'-phosphoadenosine 5'-phosphosulfate synthase 1	O43252	NO	YES	AWTVLTEYYK	610	-0.0285472	0.0625046	-0.00233145	0.0058742	0.128471	0.455846	0.0473133	0.132773	0.506756	-0.00233145
PAPSS1	Bifunctional 3'-phosphoadenosine 5'-phosphosulfate synthase 1	O43252	NO	YES	MDYYDSEHHEDFEFISGTR	572	-0.0852283	0.0614215	-0.598713	0.664835	-0.949114	0.472885	-0.135435	0.124168	0.644881	-0.598713
PAPSS1	Bifunctional 3'-phosphoadenosine 5'-phosphosulfate synthase 1	O43252	NO	YES	ELYVPENK	236	-0.0691622	0.0509847	0.451446	0.734747	0.500002	0.880083	0.116517	0.117906	0.466151	0.451446
PAPSS1	Bifunctional 3'-phosphoadenosine 5'-phosphosulfate synthase 1	O43252	NO	YES	LFADAGLVCITSFISPYTQDRNNAR	119	0.00656089	0.0113043	0.0132027	0.0246244	-0.00710909	0.0133244	0.0140027	0.026462	0.514009	0.0132027
PAPSS1	Bifunctional 3'-phosphoadenosine 5'-phosphosulfate synthase 1	O43252	NO	YES	DIVPVDASYEVK	224	0.0157196	0.00822373	0.00234629	0.00100172	0.0421838	0.0238301	-0.528696	0.604325	0.576248	0.00234629
DAPK3	Death-associated protein kinase 3	O43293	YES	YES	LQGVECGLR	446	-0.547026	0.560264	0.887178	0.665716	0.998157	0.608792	0.140272	0.0652651	0.243379	0.887178
DAPK3	Death-associated protein kinase 3	O43293	YES	YES	VLEEAAAAEEGLR	328	-0.0281008	0.0634627	-0.0453456	0.13404	0.141091	0.603945	0.090274	0.27993	0.232213	-0.0453456
DAPK3	Death-associated protein kinase 3	O43293	YES	YES	FVQDLVR	433	0.00184246	0.00221745	0.0322773	0.065766	-0.148687	0.327875	0.143736	0.532378	0.249913	0.0322773
PPIP5K2	Inositol hexakisphosphate and diphosphoinositol-pentakisphosphate kinase 2	O43314	NO	YES	SSVYSPESNVRK	219	1.77727	1.763	-1.44759	1.39831	-0.876783	0.729419	-1.18446	1.03166	0.606301	-1.44759
PPIP5K2	Inositol hexakisphosphate and diphosphoinositol-pentakisphosphate kinase 2	O43314	NO	YES	TAEISSTALR	1161	0.194524	1.16051	-0.0161012	0.0416164	0.0335594	0.177722	0.0029989	0.0079997	0.23874	-0.0161012
PPIP5K2	Inositol hexakisphosphate and diphosphoinositol-pentakisphosphate kinase 2	O43314	NO	YES	SLAFTSSIFGSWQQVVSENANYLR	1019	-1.02141	1.03425	-0.319159	0.467724	-0.586906	1.04048	-0.624807	1.19514	0.0380121	-0.319159
PPIP5K2	Inositol hexakisphosphate and diphosphoinositol-pentakisphosphate kinase 2	O43314	NO	YES	KTAEISSTALR	1160	0.232519	0.934298	0.251472	1.16164	0.277346	1.1503	0.314454	1.67571	0.75776	0.251472
PPIP5K2	Inositol hexakisphosphate and diphosphoinositol-pentakisphosphate kinase 2	O43314	NO	YES	KVSLNTYTPAK	1178	-0.150597	0.79561	0.0516626	0.217229	0.0866757	0.418037	0.0949483	0.463391	0.571349	0.0516626
PPIP5K2	Inositol hexakisphosphate and diphosphoinositol-pentakisphosphate kinase 2	O43314	NO	YES	LTSSGCIDDATR	1089	0.856849	0.759947	0.0591551	0.0321904	1.33837	1.73355	0.878537	0.842822	0.658112	0.0591551
PPIP5K2	Inositol hexakisphosphate and diphosphoinositol-pentakisphosphate kinase 2	O43314	NO	YES	SSVYSPESNVR	219	0.149766	0.666606	-0.109973	0.404797	-0.202978	0.96801	-0.11105	0.423343	0.707043	-0.109973
PPIP5K2	Inositol hexakisphosphate and diphosphoinositol-pentakisphosphate kinase 2	O43314	NO	YES	ASSKPATSGPSSAVVPNTSSR	1202	-0.168419	0.610996	-0.228395	0.484397	-0.141655	0.620365	-0.228427	1.25004	0.361411	-0.228395
PPIP5K2	Inositol hexakisphosphate and diphosphoinositol-pentakisphosphate kinase 2	O43314	NO	YES	RPFKIDNDDEPHTSK	923	0.445987	0.534055	0.0406279	0.0396524	0.19954	0.207757	0.341288	0.394873	0.0485412	0.0406279
PPIP5K2	Inositol hexakisphosphate and diphosphoinositol-pentakisphosphate kinase 2	O43314	NO	YES	EVRYPVILNAR	279	-0.58137	0.522375	-0.314489	0.251653	0.221254	0.391152	0.370511	0.791888	0.666958	-0.314489
PPIP5K2	Inositol hexakisphosphate and diphosphoinositol-pentakisphosphate kinase 2	O43314	NO	YES	LRNPFVINDLNMQYLIQDR	116	0.626961	0.398594	0.268101	0.122557	0.795872	0.574596	-0.125225	0.0640496	0.397666	0.268101
PPIP5K2	Inositol hexakisphosphate and diphosphoinositol-pentakisphosphate kinase 2	O43314	NO	YES	FFVGPEDTEINPGNYR	7	0.0516603	0.397937	0.0559016	0.225171	0.0878854	0.598661	0.0251544	0.172479	0.0870929	0.0559016
PPIP5K2	Inositol hexakisphosphate and diphosphoinositol-pentakisphosphate kinase 2	O43314	NO	YES	REVYSILQAEGILLPR	135	-0.296294	0.341898	-1.15698	1.85939	0.00304375	0.00247899	0.0492889	0.0361506	0.635302	-1.15698
PPIP5K2	Inositol hexakisphosphate and diphosphoinositol-pentakisphosphate kinase 2	O43314	NO	YES	QIVVGICSMAKK	43	0.494276	0.335556	0.775156	0.619513	-0.176933	0.0927603	0.528194	0.390103	0.53643	0.775156
PPIP5K2	Inositol hexakisphosphate and diphosphoinositol-pentakisphosphate kinase 2	O43314	NO	YES	ILPTPPATLK	1189	0.0447391	0.249905	0.015441	0.0647182	0.0606315	0.397452	0.0689672	0.397021	0.175864	0.015441
PPIP5K2	Inositol hexakisphosphate and diphosphoinositol-pentakisphosphate kinase 2	O43314	NO	YES	NPFVINDLNMQYLIQDR	118	0.347087	0.249004	-0.0155016	0.00783119	-0.647363	0.48177	0.588986	0.561388	0.0517227	-0.0155016
PPIP5K2	Inositol hexakisphosphate and diphosphoinositol-pentakisphosphate kinase 2	O43314	NO	YES	YPVILNAR	282	-0.0551341	0.241596	-0.0841835	0.353599	-0.183396	0.838096	-0.0032155	0.0112226	0.448571	-0.0841835
PPIP5K2	Inositol hexakisphosphate and diphosphoinositol-pentakisphosphate kinase 2	O43314	NO	YES	LTPSGSISLIK	641	0.133312	0.241586	0.20064	0.402241	0.0280869	0.0370138	0.0848182	0.131598	0.783665	0.20064
PPIP5K2	Inositol hexakisphosphate and diphosphoinositol-pentakisphosphate kinase 2	O43314	NO	YES	LYFTSESHVHSLLSILR	821	0.338838	0.239764	0.0148655	0.00894833	-0.617975	0.456719	0.472786	0.389269	0.206489	0.0148655
PPIP5K2	Inositol hexakisphosphate and diphosphoinositol-pentakisphosphate kinase 2	O43314	NO	YES	SKPMKEILER	57	0.311317	0.207367	0.127753	0.0757868	0.367771	0.253444	0.123526	0.0738805	0.37422	0.127753
PPIP5K2	Inositol hexakisphosphate and diphosphoinositol-pentakisphosphate kinase 2	O43314	NO	YES	AVILFKPMVSEPIHIHR	944	0.0473919	0.201601	0.00163045	0.00572664	0.0538689	0.271504	0.00141544	0.00603634	0.0757438	0.00163045
PPIP5K2	Inositol hexakisphosphate and diphosphoinositol-pentakisphosphate kinase 2	O43314	NO	YES	ILGNIVMR	341	0.0470766	0.20033	-0.131615	0.832638	-0.106606	0.529323	0.0339372	0.173332	0.406545	-0.131615
PPIP5K2	Inositol hexakisphosphate and diphosphoinositol-pentakisphosphate kinase 2	O43314	NO	YES	VCLAFKQTVCGFDLLR	297	-0.245437	0.196825	-0.312113	0.2201	-0.0455215	0.0381968	-0.345898	0.240854	0.207786	-0.312113
PPIP5K2	Inositol hexakisphosphate and diphosphoinositol-pentakisphosphate kinase 2	O43314	NO	YES	CVIAVIR	382	0.0826669	0.153022	-0.126606	0.31766	0.0435332	0.081503	-0.208275	0.514191	0.218477	-0.126606
PPIP5K2	Inositol hexakisphosphate and diphosphoinositol-pentakisphosphate kinase 2	O43314	NO	YES	AVILFKPMVSEPIHIHRK	944	-0.13881	0.142802	0.268454	0.380923	-0.0632615	0.0850722	-0.162092	0.237835	0.152219	0.268454
PPIP5K2	Inositol hexakisphosphate and diphosphoinositol-pentakisphosphate kinase 2	O43314	NO	YES	NPFVINDLNMQYLIQDRR	118	0.0515134	0.116314	-0.0251475	0.0537932	-0.236382	0.821226	-0.0520554	0.103179	0.244422	-0.0251475
PPIP5K2	Inositol hexakisphosphate and diphosphoinositol-pentakisphosphate kinase 2	O43314	NO	YES	TCDKVYSLIQSLTSQIR	662	0.153616	0.114094	0.107516	0.0998906	0.367803	0.375805	0.222283	0.194683	0.323548	0.107516
PPIP5K2	Inositol hexakisphosphate and diphosphoinositol-pentakisphosphate kinase 2	O43314	NO	YES	QIVVGICSMAK	43	0.300263	0.112409	-0.871536	0.249972	0.0775794	0.0263766	0.501036	0.176885	0.419615	-0.871536
PPIP5K2	Inositol hexakisphosphate and diphosphoinositol-pentakisphosphate kinase 2	O43314	NO	YES	EVYSILQAEGILLPR	136	0.0312971	0.0834702	-0.0264934	0.0769071	-0.0277849	0.0706592	0.100159	0.350936	0.18569	-0.0264934
PPIP5K2	Inositol hexakisphosphate and diphosphoinositol-pentakisphosphate kinase 2	O43314	NO	YES	VSLNTYTPAK	1179	0.0249052	0.0681793	0.133667	0.345762	-0.0562187	0.135893	0.0380435	0.090556	0.699669	0.133667
PPIP5K2	Inositol hexakisphosphate and diphosphoinositol-pentakisphosphate kinase 2	O43314	NO	YES	YAILNRDPNNPK	151	-0.0379021	0.0588855	-0.0166198	0.028656	-0.547701	1.86712	-0.109923	0.303289	0.89588	-0.0166198
PPIP5K2	Inositol hexakisphosphate and diphosphoinositol-pentakisphosphate kinase 2	O43314	NO	YES	FFDLFEK	407	-0.0564072	0.0555014	-0.609825	0.524457	0.0618572	0.0574883	0.400413	0.474149	0.669499	-0.609825
PPIP5K2	Inositol hexakisphosphate and diphosphoinositol-pentakisphosphate kinase 2	O43314	NO	YES	LRNPFVINDLNMQYLIQDRR	116	0.0155877	0.0447433	-0.0508293	0.13937	-0.111486	0.463462	-0.161043	0.457862	0.389539	-0.0508293
PPIP5K2	Inositol hexakisphosphate and diphosphoinositol-pentakisphosphate kinase 2	O43314	NO	YES	ANGQSYVCDVNGFSFVK	313	-0.00712449	0.0265433	-0.136584	0.612367	-0.246157	1.03795	-0.107269	0.421298	0.53719	-0.136584
PPIP5K2	Inositol hexakisphosphate and diphosphoinositol-pentakisphosphate kinase 2	O43314	NO	YES	FSISFAR	1107	0.0133214	0.0218409	-0.040755	0.0702572	0.152475	0.628165	0.0623445	0.194361	0.321985	-0.040755
PPIP5K2	Inositol hexakisphosphate and diphosphoinositol-pentakisphosphate kinase 2	O43314	NO	YES	GFPLDKAVAYAK	104	-0.0504509	0.0189759	-0.754462	0.454203	-0.784793	0.455469	-0.860503	0.687892	0.0781489	-0.754462
MAP3K7	Mitogen-activated protein kinase kinase kinase 7	O43318	YES	YES	MITTSGPTSEKPTR	464	0.236074	1.09529	0.0711847	0.239849	0.0953888	0.247486	0.0366472	0.110876	0.395709	0.0711847
MAP3K7	Mitogen-activated protein kinase kinase kinase 7	O43318	YES	YES	EIEVEEVVGR	35	-1.35966	0.669498	-0.332706	0.944172	-2.61615	5.56244	-4.01609	5.84186	6.22331	-0.332706
MAP3K7	Mitogen-activated protein kinase kinase kinase 7	O43318	YES	YES	IAATTAYSKPK	399	0.509267	0.655495	0.787276	0.85365	0.551195	0.708277	0.530559	0.612353	0.694665	0.787276
MAP3K7	Mitogen-activated protein kinase kinase kinase 7	O43318	YES	YES	DLKPPNLLLVAGGTVLK	156	-0.940453	0.569176	-0.293366	1.86854	-1.94042	7.08834	-4.37197	7.47578	5.12389	-0.293366
MAP3K7	Mitogen-activated protein kinase kinase kinase 7	O43318	YES	YES	SDTNMEQVPATNDTIK	331	0.812997	0.541462	-0.738974	0.311606	-0.0835649	0.0247813	0.329864	0.113975	0.059276	-0.738974
MAP3K7	Mitogen-activated protein kinase kinase kinase 7	O43318	YES	YES	AFIVELR	73	-1.44841	0.528895	0.0180799	0.0643548	-0.326508	1.81687	-0.422306	2.82021	2.59694	0.0180799
MAP3K7	Mitogen-activated protein kinase kinase kinase 7	O43318	YES	YES	KAFIVELR	72	-1.52223	0.520005	-0.0239938	0.0547434	-1.1248	4.77894	-4.15666	4.90409	5.26764	-0.0239938
MAP3K7	Mitogen-activated protein kinase kinase kinase 7	O43318	YES	YES	ESMAVFEQHCK	518	0.225318	0.462057	0.122614	0.250524	0.0961255	0.195725	0.200309	0.511016	0.238973	0.122614
MAP3K7	Mitogen-activated protein kinase kinase kinase 7	O43318	YES	YES	SIQDLTVTGTEPGQVSSR	439	-0.249916	0.458471	-0.0427045	0.0627911	-3.44687e-05	0.000118995	0.0101648	0.026673	0.184589	-0.0427045
MAP3K7	Mitogen-activated protein kinase kinase kinase 7	O43318	YES	YES	SLSTYYQQCKK	580	0.394611	0.438391	-0.427995	0.31788	-0.873127	0.714979	0.0663267	0.0682929	0.351392	-0.427995
MAP3K7	Mitogen-activated protein kinase kinase kinase 7	O43318	YES	YES	VNHPNIVK	84	0.469434	0.401819	-0.414913	0.275044	-0.64325	0.612839	-0.989101	1.04789	0.247285	-0.414913
MAP3K7	Mitogen-activated protein kinase kinase kinase 7	O43318	YES	YES	NLPKPIESLMTR	254	-0.804698	0.349679	0.0965942	0.217883	-2.04456	4.09322	-3.85078	6.1902	5.17854	0.0965942
MAP3K7	Mitogen-activated protein kinase kinase kinase 7	O43318	YES	YES	MSADMSEIEAR	388	0.0632888	0.250111	0.00498841	0.0111639	0.0877991	0.363508	0.0392925	0.135916	0.0738186	0.00498841
MAP3K7	Mitogen-activated protein kinase kinase kinase 7	O43318	YES	YES	VQTEIALLLQR	536	0.0495628	0.160261	0.0439473	0.110576	-0.0169883	0.0523104	-0.0515853	0.203641	0.0403266	0.0439473
MAP3K7	Mitogen-activated protein kinase kinase kinase 7	O43318	YES	YES	ICDFGTACDIQTHMTNNK	173	-0.246114	0.0992059	-0.351338	0.147642	-0.806611	0.304594	-0.525843	0.207085	1.43281	-0.351338
MAP3K7	Mitogen-activated protein kinase kinase kinase 7	O43318	YES	YES	KQELVAELDQDEKDQQNTSR	547	0.157393	0.0855388	-0.657858	0.445776	-0.462868	0.358105	-0.362229	0.300608	1.02144	-0.657858
MAP3K7	Mitogen-activated protein kinase kinase kinase 7	O43318	YES	YES	SLSTYYQQCK	580	-0.0349313	0.0667775	0.13592	0.311899	0.269953	0.934956	0.0932041	0.268219	0.0198015	0.13592
MAP3K7	Mitogen-activated protein kinase kinase kinase 7	O43318	YES	YES	TASFGNILDVPEIVISGNGQPR	415	0.0353433	0.0510769	-0.204083	0.291263	-0.102697	0.164149	-0.336069	0.49165	0.278343	-0.204083
MAP3K7	Mitogen-activated protein kinase kinase kinase 7	O43318	YES	YES	IMWAVHNGTRPPLIK	239	0.0617809	0.0418434	-0.0764183	0.0590897	-1.03358	1.43041	-0.756414	0.840217	0.821898	-0.0764183
MAP3K7	Mitogen-activated protein kinase kinase kinase 7	O43318	YES	YES	RKPFDEIGGPAFR	226	-0.0877907	0.0241852	0.670014	0.804725	-3.01672	3.45161	-2.38862	3.08103	3.47483	0.670014
MAP3K7	Mitogen-activated protein kinase kinase kinase 7	O43318	YES	YES	KTASFGNILDVPEIVISGNGQPR	414	0.0547509	0.0193537	0.634882	0.278575	-0.421946	0.129789	0.94705	0.498685	0.0149355	0.634882
RIPK2	Receptor-interacting serine/threonine-protein kinase 2	O43353	YES	YES	ILHEIALGVNYLHNMTPPLLHHDLK	124	-1.84293	0.851294	-2.09554	0.688274	0.340735	0.207506	-0.513881	0.384036	0.025197	-2.09554
RIPK2	Receptor-interacting serine/threonine-protein kinase 2	O43353	YES	YES	IADFGLSK	162	-0.491397	0.76774	-0.617087	2.4962	-0.969672	3.9222	-0.939862	2.89525	2.88762	-0.617087
RIPK2	Receptor-interacting serine/threonine-protein kinase 2	O43353	YES	YES	KTEYPDVAWPLR	110	-0.379684	0.609747	-0.802843	1.04793	0.0604854	0.0900499	-0.807967	1.36528	0.58332	-0.802843
RIPK2	Receptor-interacting serine/threonine-protein kinase 2	O43353	YES	YES	TQNILLDNEFHVK	149	-0.200626	0.458189	0.07561	0.165401	0.0255766	0.047169	-0.083734	0.148848	0.0466317	0.07561
RIPK2	Receptor-interacting serine/threonine-protein kinase 2	O43353	YES	YES	LQPGIAQQWIQSK	431	-0.238804	0.403033	-0.153608	0.27282	0.105103	0.330544	-0.00610229	0.0120691	0.0688768	-0.153608
RIPK2	Receptor-interacting serine/threonine-protein kinase 2	O43353	YES	YES	SLPAPQDNDFLSR	363	-0.0492559	0.210561	0.0259816	0.118107	0.0457597	0.224044	0.0405517	0.199716	0.442223	0.0259816
RIPK2	Receptor-interacting serine/threonine-protein kinase 2	O43353	YES	YES	CLIELEPVLR	286	0.330471	0.191056	-0.0232952	0.0103323	0.0103472	0.00484139	-0.392948	0.261519	0.355072	-0.0232952
RIPK2	Receptor-interacting serine/threonine-protein kinase 2	O43353	YES	YES	LHHCPGNHSWDSTISGSQR	385	-0.117643	0.183768	-0.41752	0.968763	-0.290034	0.595652	-0.6804	0.954399	0.905447	-0.41752
RIPK2	Receptor-interacting serine/threonine-protein kinase 2	O43353	YES	YES	SPSLNLLQNK	529	-0.137138	0.18029	0.154291	0.304988	0.249474	0.655903	0.336567	1.13051	1.82973	0.154291
RIPK2	Receptor-interacting serine/threonine-protein kinase 2	O43353	YES	YES	DLIMKEDYELVSTKPTR	467	0.236159	0.112432	-0.485378	0.208529	0.408094	0.21144	-0.556829	0.2988	0.0323581	-0.485378
RIPK2	Receptor-interacting serine/threonine-protein kinase 2	O43353	YES	YES	TTPCSSAIINPLSTAGNSER	411	0.117707	0.0713076	0.306421	0.35081	0.264665	0.317342	-0.396826	0.269049	0.47332	0.306421
RIPK2	Receptor-interacting serine/threonine-protein kinase 2	O43353	YES	YES	MISLIESGWAQNPDERPSFLK	265	0.28479	0.0617068	1.6576	0.551119	0.530934	0.114413	-2.84494	0.943525	0.365517	1.6576
RIPK2	Receptor-interacting serine/threonine-protein kinase 2	O43353	YES	YES	QMGLQPYPEILVVSR	514	0.0423284	0.0425074	-0.0446447	0.0437	0.338682	0.33349	0.635116	0.906722	0.943992	-0.0446447
RIPK2	Receptor-interacting serine/threonine-protein kinase 2	O43353	YES	YES	QLLDTTDIQGEEFAK	489	0.00293706	0.00253821	0.0551018	0.0481264	-0.0812154	0.0791397	0.0486841	0.0370035	0.0954361	0.0551018
BUB1	Mitotic checkpoint serine/threonine-protein kinase BUB1	O43683	YES	YES	VQKPANPWEFYIGTQLMER	822	-3.60894	1.98491	-0.838403	1.84332	-1.22152	0.614989	-0.256182	0.272084	0.423388	-0.838403
BUB1	Mitotic checkpoint serine/threonine-protein kinase BUB1	O43683	YES	YES	FISYCLK	68	-0.913133	1.55471	-0.52544	0.461194	-0.105013	0.106406	-0.680586	1.27531	0.973269	-0.52544
BUB1	Mitotic checkpoint serine/threonine-protein kinase BUB1	O43683	YES	YES	EFLQQQYR	134	1.16153	1.02861	1.33873	1.22403	1.37585	1.30857	1.10598	0.948104	0.963701	1.33873
BUB1	Mitotic checkpoint serine/threonine-protein kinase BUB1	O43683	YES	YES	LIRGESEFSFEELR	242	0.793134	0.838361	0.522228	0.373279	0.149685	0.0736714	0.874944	1.01456	0.554661	0.522228
BUB1	Mitotic checkpoint serine/threonine-protein kinase BUB1	O43683	YES	YES	DEWQSLDQNEDAFEAQFQK	488	1.23239	0.591354	0.282875	0.145709	-0.361136	0.204571	-1.16541	1.60955	0.0738518	0.282875
BUB1	Mitotic checkpoint serine/threonine-protein kinase BUB1	O43683	YES	YES	QALSSHMYSASLLR	664	0.813955	0.546416	-0.984337	0.414214	0.213723	0.115356	-0.0477313	0.019273	0.396566	-0.984337
BUB1	Mitotic checkpoint serine/threonine-protein kinase BUB1	O43683	YES	YES	EANAFEEQLLK	280	-0.889742	0.53394	-0.1764	0.0891963	0.228969	0.0946788	0.38325	0.203373	0.195698	-0.1764
BUB1	Mitotic checkpoint serine/threonine-protein kinase BUB1	O43683	YES	YES	TSEPLHNVQVLNQMITSK	158	-0.248269	0.462959	0.0896133	0.123257	-0.0364405	0.0364155	0.54758	0.634002	0.388754	0.0896133
BUB1	Mitotic checkpoint serine/threonine-protein kinase BUB1	O43683	YES	YES	LTETHLPAQAR	147	0.42695	0.371152	1.10722	1.35478	0.997982	0.993894	0.307338	0.177624	0.897451	1.10722
BUB1	Mitotic checkpoint serine/threonine-protein kinase BUB1	O43683	YES	YES	LIVLLLECKR	1073	-0.536284	0.356404	-0.258049	0.343447	-2.09649	3.33757	-2.92568	4.27439	4.03574	-0.258049
BUB1	Mitotic checkpoint serine/threonine-protein kinase BUB1	O43683	YES	YES	IISSLSSAFHVFEDGNKENYGLPQPK	519	0.56717	0.33374	-0.114327	0.042645	-0.142731	0.0479597	0.0313299	0.0119821	0.342152	-0.114327
BUB1	Mitotic checkpoint serine/threonine-protein kinase BUB1	O43683	YES	YES	GIQNQAEPR	125	-0.257339	0.314226	-0.590017	0.507849	-0.285424	0.261205	-0.15991	0.136636	0.046542	-0.590017
BUB1	Mitotic checkpoint serine/threonine-protein kinase BUB1	O43683	YES	YES	MGPSVGSQQELR	325	0.166827	0.26133	0.103661	0.141076	0.315491	0.612476	0.27489	0.416472	0.303049	0.103661
BUB1	Mitotic checkpoint serine/threonine-protein kinase BUB1	O43683	YES	YES	VDVEQVVMYCKEK	229	-0.670143	0.185299	0.751807	0.246288	-0.137695	0.0348448	-0.427606	0.109643	1.34172	0.751807
BUB1	Mitotic checkpoint serine/threonine-protein kinase BUB1	O43683	YES	YES	GESEFSFEELR	245	-0.0878745	0.105256	-0.519111	0.430456	-0.0828797	0.11977	0.149953	0.299832	0.853591	-0.519111
BUB1	Mitotic checkpoint serine/threonine-protein kinase BUB1	O43683	YES	YES	LPVESVHILEDKENVVAK	614	0.311681	0.0755844	-0.111831	0.0310428	2.0359	0.903952	-0.146916	0.0398355	0.11726	-0.111831
MAST3	Microtubule-associated serine/threonine-protein kinase 3	O60307	YES	YES	NFSAASALNFPFAR	64	0.742648	0.621303	0.463202	0.338348	0.539056	0.430675	0.389566	0.315118	0.524859	0.463202
MAST3	Microtubule-associated serine/threonine-protein kinase 3	O60307	YES	YES	FAFSSEDEGVGPGPAGPK	789	-0.77672	0.590611	0.382716	0.33488	0.556715	0.642048	0.113032	0.0660624	0.279336	0.382716
MAST3	Microtubule-associated serine/threonine-protein kinase 3	O60307	YES	YES	QHPFFLALDWAGLLR	636	0.462894	0.554768	-0.3069	0.255316	0.116068	0.103427	0.821703	1.00425	0.330902	-0.3069
MAST3	Microtubule-associated serine/threonine-protein kinase 3	O60307	YES	YES	LALADGVLGFIHHQIVELAR	204	-0.419835	0.259912	-0.208633	0.205003	0.189113	0.155449	0.241932	0.153282	0.365702	-0.208633
MAST3	Microtubule-associated serine/threonine-protein kinase 3	O60307	YES	YES	LHQLPFQPTPDELHFLSK	113	-0.843721	0.216568	0.422985	0.149475	0.753968	0.293231	0.476625	0.173338	0.15206	0.422985
MAST3	Microtubule-associated serine/threonine-protein kinase 3	O60307	YES	YES	LYFAETVLALEYLHNYGIVHR	469	-0.112485	0.0786088	0.310422	0.328866	-0.191952	0.177401	-1.07166	1.08391	0.80534	0.310422
PIP5K1C	Phosphatidylinositol 4-phosphate 5-kinase type-1 gamma	O60331	NO	YES	ALYSTAMESIQGGAAR	352	-0.498378	1.26525	-0.13338	0.20883	-0.0325247	0.0525178	-0.0524539	0.10414	0.499105	-0.13338
PIP5K1C	Phosphatidylinositol 4-phosphate 5-kinase type-1 gamma	O60331	NO	YES	DCLVLESFK	305	-0.850739	0.497452	0.118615	0.0928053	0.0932565	0.0477946	-0.00551213	0.00273436	0.135256	0.118615
PIP5K1C	Phosphatidylinositol 4-phosphate 5-kinase type-1 gamma	O60331	NO	YES	LLLHIGIIDILQSYR	390	0.364449	0.322112	-0.0224729	0.0106748	0.0202909	0.0133636	-0.324172	0.241071	0.330949	-0.0224729
PIP5K1C	Phosphatidylinositol 4-phosphate 5-kinase type-1 gamma	O60331	NO	YES	GAIQLGIGYTVGHLSSKPER	81	-0.523086	0.210143	0.801674	0.66651	0.511364	0.454687	0.0303599	0.00995605	0.954873	0.801674
PIP5K1C	Phosphatidylinositol 4-phosphate 5-kinase type-1 gamma	O60331	NO	YES	VVVMNNILPR	235	0.126255	0.191458	0.0469892	0.0383779	0.414705	0.97657	-0.849576	0.397402	0.929237	0.0469892
PIP5K1C	Phosphatidylinositol 4-phosphate 5-kinase type-1 gamma	O60331	NO	YES	IMDYSLLLGVHNIDQHER	314	-0.343985	0.16642	0.428439	0.251208	0.0827717	0.0377358	0.823751	0.519737	0.216371	0.428439
BUB1B	Mitotic checkpoint serine/threonine-protein kinase BUB1 beta	O60566	YES	YES	FVSTPFHEIMSLK	617	0.49947	1.46874	0.271781	0.569289	0.461017	1.24957	0.060075	0.0743369	0.548491	0.271781
BUB1B	Mitotic checkpoint serine/threonine-protein kinase BUB1 beta	O60566	YES	YES	LSPIIEDSR	669	-0.40061	1.25004	-0.286762	0.824446	-0.329349	0.969254	-0.279184	0.63247	0.632799	-0.286762
BUB1B	Mitotic checkpoint serine/threonine-protein kinase BUB1 beta	O60566	YES	YES	QTLLALEKEEEEEVFESSVPQR	203	1.71893	1.13179	-0.239624	0.143035	0.886753	0.534694	-0.0731791	0.135806	0.0670858	-0.239624
BUB1B	Mitotic checkpoint serine/threonine-protein kinase BUB1 beta	O60566	YES	YES	GPSVPFSIFDEFLLSEK	523	0.782244	0.992057	0.722061	0.959622	0.653721	0.79282	0.527255	0.651901	0.571808	0.722061
BUB1B	Mitotic checkpoint serine/threonine-protein kinase BUB1 beta	O60566	YES	YES	AKENELQAGPWNTGR	303	-0.4269	0.880447	-0.426595	0.749799	-0.405171	0.689689	-0.817469	2.54571	0.541774	-0.426595
BUB1B	Mitotic checkpoint serine/threonine-protein kinase BUB1 beta	O60566	YES	YES	IYAGVGEFSFEEIRAEVFR	403	0.674082	0.746985	0.53348	0.550808	0.417721	0.406546	-0.109324	0.0790969	0.132363	0.53348
BUB1B	Mitotic checkpoint serine/threonine-protein kinase BUB1 beta	O60566	YES	YES	VQLDVFTLSGFR	920	0.282847	0.697619	0.0822941	0.206737	0.070916	0.337054	0.101282	0.552429	0.163256	0.0822941
BUB1B	Mitotic checkpoint serine/threonine-protein kinase BUB1 beta	O60566	YES	YES	NSAELTVIK	787	0.835447	0.549186	0.832515	0.498328	0.450018	0.206405	0.875073	0.941336	0.584479	0.832515
BUB1B	Mitotic checkpoint serine/threonine-protein kinase BUB1 beta	O60566	YES	YES	IPGMTLSSSVCQVNCCAR	489	0.217707	0.361871	-0.181063	0.207284	-0.272499	0.308234	0.000610126	0.000732083	0.795664	-0.181063
BUB1B	Mitotic checkpoint serine/threonine-protein kinase BUB1 beta	O60566	YES	YES	EAELLTSAEKR	429	-0.162979	0.288363	0.111813	0.267939	0.108776	0.351214	0.116454	0.402567	0.292453	0.111813
BUB1B	Mitotic checkpoint serine/threonine-protein kinase BUB1 beta	O60566	YES	YES	IVDFSYSVDLR	909	0.0795108	0.282348	-0.150842	0.3602	-0.0737112	0.230878	-0.119193	0.256922	0.15522	-0.150842
BUB1B	Mitotic checkpoint serine/threonine-protein kinase BUB1 beta	O60566	YES	YES	KADAIFQEGIQQK	170	-0.18261	0.281429	-0.30859	0.49284	-0.178166	0.256641	-0.175045	0.269469	0.0646618	-0.30859
BUB1B	Mitotic checkpoint serine/threonine-protein kinase BUB1 beta	O60566	YES	YES	LTSPGALLFQ	1041	0.164418	0.269637	0.156486	0.21651	0.0765739	0.13091	0.266579	0.590067	0.0879148	0.156486
BUB1B	Mitotic checkpoint serine/threonine-protein kinase BUB1 beta	O60566	YES	YES	DLPSDPER	630	-0.298213	0.219368	-0.126755	0.107707	0.504707	0.951118	0.363353	0.555505	0.187361	-0.126755
BUB1B	Mitotic checkpoint serine/threonine-protein kinase BUB1 beta	O60566	YES	YES	IYAGVGEFSFEEIR	403	-0.0819437	0.18398	0.0101006	0.0217442	0.101326	0.36393	-0.325022	0.787807	1.51868	0.0101006
BUB1B	Mitotic checkpoint serine/threonine-protein kinase BUB1 beta	O60566	YES	YES	KPGKEEGDPLQR	370	-0.112448	0.151331	-0.0462194	0.0601205	-0.0408802	0.0428776	-0.315188	0.306072	0.112725	-0.0462194
BUB1B	Mitotic checkpoint serine/threonine-protein kinase BUB1 beta	O60566	YES	YES	GLQNPFPQQMQNNSR	257	-0.384282	0.133249	0.639847	0.552594	0.450543	0.297118	0.230508	0.150571	0.671173	0.639847
BUB1B	Mitotic checkpoint serine/threonine-protein kinase BUB1 beta	O60566	YES	YES	LKEIQTTQQER	453	0.0673972	0.10164	0.167163	0.29469	-0.293967	0.49337	-0.151214	0.265942	0.0253456	0.167163
BUB1B	Mitotic checkpoint serine/threonine-protein kinase BUB1 beta	O60566	YES	YES	LFWVAPR	780	0.0382012	0.0948661	0.0099497	0.0214113	0.0659855	0.2464	0.0335682	0.110351	0.231363	0.0099497
BUB1B	Mitotic checkpoint serine/threonine-protein kinase BUB1 beta	O60566	YES	YES	FYTGNDPLDVWDR	68	0.0854168	0.0789499	0.364327	0.489036	0.130505	0.128856	-0.94789	1.35123	0.986156	0.364327
BUB1B	Mitotic checkpoint serine/threonine-protein kinase BUB1 beta	O60566	YES	YES	LQIASESQK	480	-0.0572761	0.0780811	-0.0148445	0.0228587	-0.0233328	0.05	0.256611	0.825695	0.149087	-0.0148445
BUB1B	Mitotic checkpoint serine/threonine-protein kinase BUB1 beta	O60566	YES	YES	LLPEEDLDVK	638	-0.125921	0.0777441	0.630638	0.841813	0.251393	0.244159	-0.237354	0.154529	0.200915	0.630638
BUB1B	Mitotic checkpoint serine/threonine-protein kinase BUB1 beta	O60566	YES	YES	GPSVPFSIFDEFLLSEKK	523	0.0316422	0.0736305	0.0181899	0.0424029	0.136138	0.481751	0.024297	0.06274	0.406753	0.0181899
BUB1B	Mitotic checkpoint serine/threonine-protein kinase BUB1 beta	O60566	YES	YES	TVQILEGQK	932	0.236002	0.0726587	1.47554	0.735514	1.54298	0.759984	0.980917	0.397773	0.807879	1.47554
BUB1B	Mitotic checkpoint serine/threonine-protein kinase BUB1 beta	O60566	YES	YES	NVTICPNPEDTCDFAR	598	-0.0224806	0.0699543	0.096215	0.434005	-0.037125	0.0793431	0.127939	0.541894	0.607111	0.096215
BUB1B	Mitotic checkpoint serine/threonine-protein kinase BUB1 beta	O60566	YES	YES	FLNLWLK	121	0.0332224	0.0664222	0.0860522	0.22548	0.104762	0.274611	0.0302895	0.0757775	0.464619	0.0860522
BUB1B	Mitotic checkpoint serine/threonine-protein kinase BUB1 beta	O60566	YES	YES	STLAELK	225	-0.110779	0.0635102	0.0863767	0.0489012	-0.0521394	0.0298967	0.069584	0.040537	0.155469	0.0863767
BUB1B	Mitotic checkpoint serine/threonine-protein kinase BUB1 beta	O60566	YES	YES	AFEYEIR	61	0.0251097	0.0341973	0.0871541	0.12131	-0.0402576	0.0419408	0.12074	0.208696	0.622853	0.0871541
BUB1B	Mitotic checkpoint serine/threonine-protein kinase BUB1 beta	O60566	YES	YES	VGGALKAPSQNR	245	0.0209557	0.028148	0.351861	0.725807	0.168269	0.22675	-0.131766	0.199186	0.066682	0.351861
BUB1B	Mitotic checkpoint serine/threonine-protein kinase BUB1 beta	O60566	YES	YES	EATHSSGFSGSSASVASTSSIK	678	0.000763724	0.00106333	-0.187343	0.279943	-0.121004	0.1944	-0.132716	0.264494	0.0693317	-0.187343
JAK2	Tyrosine-protein kinase JAK2	O60674	YES	YES	NFSSLKDLLNCYQMETVR	470	-3.29229	1.08866	-5.10535	2.50479	0.452029	0.270521	-3.04225	1.16713	0.914101	-5.10535
JAK2	Tyrosine-protein kinase JAK2	O60674	YES	YES	VVTIHKQDGK	341	-1.09226	1.04429	-0.337953	0.427561	-0.520724	0.753484	-0.647094	1.03492	0.383815	-0.337953
JAK2	Tyrosine-protein kinase JAK2	O60674	YES	YES	QGQMIVFHLIELLK	1070	0.876857	0.574574	-0.423578	0.158574	0.778718	0.312576	1.76296	1.47795	1.31621	-0.423578
JAK2	Tyrosine-protein kinase JAK2	O60674	YES	YES	IGALGFSGAFEDRDPTQFEER	827	-0.585442	0.549366	-0.472127	2.10874	-1.54559	3.85398	-1.95138	1.71022	3.81254	-0.472127
JAK2	Tyrosine-protein kinase JAK2	O60674	YES	YES	EVAPPAVLENIQSNCHGPISMDFAISK	386	-0.593193	0.52247	-1.03785	1.12895	-0.507623	0.529302	-0.371446	0.391626	0.376862	-1.03785
JAK2	Tyrosine-protein kinase JAK2	O60674	YES	YES	FIQQFSQCK	236	0.765317	0.410784	-0.463031	0.203416	-0.374098	0.170233	-0.609643	0.269909	0.00635607	-0.463031
JAK2	Tyrosine-protein kinase JAK2	O60674	YES	YES	NILVENENR	981	-0.342255	0.335065	-0.923557	1.72346	-1.61693	2.57775	-1.32444	2.79957	2.73921	-0.923557
JAK2	Tyrosine-protein kinase JAK2	O60674	YES	YES	KLQFYEDR	762	-0.521631	0.326761	0.519969	0.645754	0.179333	0.20375	-0.298118	0.169732	1.02931	0.519969
JAK2	Tyrosine-protein kinase JAK2	O60674	YES	YES	VKEPGESPIFWYAPESLTESK	1010	0.372471	0.290652	-0.174507	0.100485	-1.40167	1.12612	-1.09583	0.8268	0.487629	-0.174507
JAK2	Tyrosine-protein kinase JAK2	O60674	YES	YES	EVGDYGQLHETEVLLK	566	-0.427045	0.258538	0.722958	0.681671	0.681409	0.695565	-0.0163949	0.0104717	0.0374363	0.722958
JAK2	Tyrosine-protein kinase JAK2	O60674	YES	YES	LLQYTSQICK	953	0.524215	0.252467	-0.542907	0.221342	-0.337954	0.122213	-0.394046	0.164005	0.398996	-0.542907
JAK2	Tyrosine-protein kinase JAK2	O60674	YES	YES	IRNEDLIFNESLGQGTFTK	540	-0.127125	0.2471	-0.0849864	0.0923767	-0.0862333	0.135834	-0.101794	0.20282	0.0734167	-0.0849864
JAK2	Tyrosine-protein kinase JAK2	O60674	YES	YES	EALSFVSLIDGYYR	361	0.10796	0.214356	-0.568465	0.468961	0.0363222	0.0745998	0.136467	0.335087	0.328397	-0.568465
JAK2	Tyrosine-protein kinase JAK2	O60674	YES	YES	LSDPGISITVLPK	697	0.0362492	0.108416	0.0832767	0.267764	0.0636611	0.20904	-0.0425404	0.122365	0.205871	0.0832767
JAK2	Tyrosine-protein kinase JAK2	O60674	YES	YES	DLNSLFTPDYELLTENDMLPNMR	804	-0.130791	0.10759	-0.322043	0.31306	-0.665689	0.658254	-0.910685	0.998987	0.0979627	-0.322043
JAK2	Tyrosine-protein kinase JAK2	O60674	YES	YES	NLEIELSSLR	351	0.0323307	0.0699336	0.109063	0.219244	0.0896871	0.191012	0.0187817	0.0317155	0.370993	0.109063
JAK2	Tyrosine-protein kinase JAK2	O60674	YES	YES	LIMEYLPYGSLR	927	0.0469615	0.0479456	-0.525301	1.08141	-0.761932	1.66411	-0.77697	1.76608	1.56605	-0.525301
JAK2	Tyrosine-protein kinase JAK2	O60674	YES	YES	SNLLVFR	507	-0.0109564	0.0273771	0.126626	0.380049	0.180194	0.640152	0.131607	0.357888	0.11235	0.126626
JAK2	Tyrosine-protein kinase JAK2	O60674	YES	YES	SDNIIFQFTK	488	-0.00370739	0.00374563	-0.122126	0.136337	0.00898037	0.0118055	-0.0435877	0.0461215	0.497286	-0.122126
PFKFB2	6-phosphofructo-2-kinase/fructose-2,6-bisphosphatase 2	O60825	NO	YES	VFNLGVYR	71	-0.675303	1.42762	-0.730068	0.550108	-0.646695	0.800042	-0.438175	1.40021	0.588095	-0.730068
PFKFB2	6-phosphofructo-2-kinase/fructose-2,6-bisphosphatase 2	O60825	NO	YES	DMILNFAEQNSFK	138	-2.27644	1.30023	-1.22233	0.660701	-2.0421	1.22565	-1.65245	0.964069	0.263251	-1.22233
PFKFB2	6-phosphofructo-2-kinase/fructose-2,6-bisphosphatase 2	O60825	NO	YES	VFFVESVCDDPDVIAANILEVK	151	-0.542654	0.742764	-0.203914	0.241103	-0.941711	1.19425	-1.81736	2.53561	1.29731	-0.203914
PFKFB2	6-phosphofructo-2-kinase/fructose-2,6-bisphosphatase 2	O60825	NO	YES	NYSVGSRPLKPLSPLR	481	0.1007	0.578767	0.0694882	0.354406	0.0604137	0.32245	0.0769294	0.416471	0.0725775	0.0694882
PFKFB2	6-phosphofructo-2-kinase/fructose-2,6-bisphosphatase 2	O60825	NO	YES	NSFTPLSSSNTIR	465	0.0826684	0.388857	0.133003	0.799457	0.138491	1.02614	0.151133	1.2318	0.826772	0.133003
PFKFB2	6-phosphofructo-2-kinase/fructose-2,6-bisphosphatase 2	O60825	NO	YES	AYLTEENGQIAVFDATNTTR	115	-0.676119	0.324321	-0.0155255	0.00863421	0.221778	0.141164	-0.403365	0.202598	0.713512	-0.0155255
PFKFB2	6-phosphofructo-2-kinase/fructose-2,6-bisphosphatase 2	O60825	NO	YES	DKPTNNFPK	447	0.603722	0.269039	-0.730279	0.259646	0.704853	0.335007	-0.356055	0.0937154	0.0442653	-0.730279
PFKFB2	6-phosphofructo-2-kinase/fructose-2,6-bisphosphatase 2	O60825	NO	YES	ENVMEDFLKR	184	0.12509	0.152754	-0.0665082	0.0753153	0.120755	0.157789	-0.131852	0.191143	0.206295	-0.0665082
PFKFB2	6-phosphofructo-2-kinase/fructose-2,6-bisphosphatase 2	O60825	NO	YES	NRENVMEDFLK	182	-0.0684436	0.147407	-0.110659	0.291571	-0.0149266	0.0491906	0.0774843	0.341546	0.923907	-0.110659
PFKFB2	6-phosphofructo-2-kinase/fructose-2,6-bisphosphatase 2	O60825	NO	YES	ENVMEDFLK	184	0.0512705	0.137541	0.0565474	0.169176	0.205858	0.577171	0.218262	1.03592	0.867399	0.0565474
PFKFB2	6-phosphofructo-2-kinase/fructose-2,6-bisphosphatase 2	O60825	NO	YES	VSSPDYPER	173	-0.00832991	0.0236904	0.0807114	0.260324	-0.0570489	0.217704	-0.164559	0.543481	0.722912	0.0807114
BRD4	Bromodomain-containing protein 4	O60885	YES	NO	KADTTTPTTIDPIHEPPSLPPEPK	291	-1.21265	1.9538	0.0982516	0.0685139	-0.878284	1.02603	-1.06814	1.83649	1.48208	0.0982516
BRD4	Bromodomain-containing protein 4	O60885	YES	NO	AASVVQPQPLVVVK	1098	-0.515012	0.998103	-0.0387644	0.0466405	0.0502844	0.08845	-0.179113	0.417475	0.0520282	-0.0387644
BRD4	Bromodomain-containing protein 4	O60885	YES	NO	NSNPDEIEIDFETLKPSTLR	646	-0.619783	0.916222	0.0562905	0.10751	-0.114673	0.447314	-0.00608778	0.0234515	0.147296	0.0562905
BRD4	Bromodomain-containing protein 4	O60885	YES	NO	YVTSCLR	670	0.122077	0.776453	-0.0140019	0.0614875	0.0577823	0.462724	0.0740809	0.840967	0.292786	-0.0140019
BRD4	Bromodomain-containing protein 4	O60885	YES	NO	SEPFSPSLRPEPPKHPESIK	1122	-0.942487	0.733712	-0.356724	0.35325	-0.23143	0.181048	-0.557454	0.470911	0.0250025	-0.356724
BRD4	Bromodomain-containing protein 4	O60885	YES	NO	DVPDSQQHPAPEK	334	0.173523	0.705199	0.158302	0.69212	0.0465401	0.136067	-0.131108	0.584006	0.0831385	0.158302
BRD4	Bromodomain-containing protein 4	O60885	YES	NO	YNPPDHEVVAMAR	432	0.520857	0.666192	0.0529	0.0528853	0.196953	0.21832	-0.229024	0.202222	0.531264	0.0529
BRD4	Bromodomain-containing protein 4	O60885	YES	NO	SSSDSFEQFRR	1219	0.159033	0.6525	0.0223569	0.0534371	-0.0778924	0.227034	-0.250971	0.987749	0.351015	0.0223569
BRD4	Bromodomain-containing protein 4	O60885	YES	NO	AASVVQPQPLVVVKEEK	1098	-0.168721	0.643874	-0.0597521	0.178134	-0.222096	0.895652	-0.138692	0.845329	0.592808	-0.0597521
BRD4	Bromodomain-containing protein 4	O60885	YES	NO	ESSRPVKPPKK	323	-1.0083	0.596814	0.905919	2.84096	0.473008	0.453218	-0.166524	0.149004	0.763513	0.905919
BRD4	Bromodomain-containing protein 4	O60885	YES	NO	HHKSDPYSTGHLR	1048	0.345486	0.524816	0.533624	0.955329	0.338268	0.566561	-0.632817	1.21695	0.182528	0.533624
BRD4	Bromodomain-containing protein 4	O60885	YES	NO	NMGSWASLVQK	1198	-0.659335	0.494721	-0.0197876	0.03429	-0.0829239	0.16856	0.0994374	0.226333	0.123477	-0.0197876
BRD4	Bromodomain-containing protein 4	O60885	YES	NO	HQFAWPFQQPVDAVK	77	0.637931	0.46878	0.739312	0.647092	0.483657	0.536046	0.703423	0.654652	0.147294	0.739312
BRD4	Bromodomain-containing protein 4	O60885	YES	NO	KLQDVFEMR	445	-0.421668	0.439406	-0.181452	0.318839	-1.34896	1.26081	-0.444128	0.452409	1.08237	-0.181452
BRD4	Bromodomain-containing protein 4	O60885	YES	NO	KPQAEKVDVIAGSSK	680	-0.255153	0.436406	-0.0525748	0.0743436	-0.0933963	0.177085	-0.0340115	0.0562663	0.0655217	-0.0525748
BRD4	Bromodomain-containing protein 4	O60885	YES	NO	IKNMGSWASLVQK	1196	0.160679	0.360762	-0.212226	0.412581	0.098232	0.17171	0.0684784	0.140437	0.340145	-0.212226
BRD4	Bromodomain-containing protein 4	O60885	YES	NO	VQPPTPLLPSVK	938	0.0414052	0.348076	0.057169	0.394091	0.0488774	0.467477	0.0888039	0.816421	0.324102	0.057169
BRD4	Bromodomain-containing protein 4	O60885	YES	NO	QTNQLQYLLR	59	-0.454741	0.34253	-0.220049	0.160574	0.139432	0.0948043	0.336601	0.315992	0.663923	-0.220049
BRD4	Bromodomain-containing protein 4	O60885	YES	NO	KDVPDSQQHPAPEK	333	0.362516	0.27951	-0.425449	0.452777	0.308772	0.277405	-0.267504	0.264387	0.277184	-0.425449
BRD4	Bromodomain-containing protein 4	O60885	YES	NO	SSSDSFEQFR	1219	-0.0942343	0.27057	-0.0420915	0.163331	0.0152864	0.0584842	-0.0294306	0.13556	0.0702063	-0.0420915
BRD4	Bromodomain-containing protein 4	O60885	YES	NO	SDPYSTGHLR	1051	0.142945	0.259209	0.365553	1.08247	0.281616	1.07989	-0.222456	0.492116	0.31749	0.365553
BRD4	Bromodomain-containing protein 4	O60885	YES	NO	VDVIAGSSK	686	-0.0849974	0.223265	-0.047996	0.137488	-0.0959735	0.435519	0.00973682	0.0265998	0.765695	-0.047996
BRD4	Bromodomain-containing protein 4	O60885	YES	NO	VVHIIQSR	633	0.135359	0.210254	0.15946	0.546935	0.0112212	0.0255218	0.04343	0.122638	0.656703	0.15946
BRD4	Bromodomain-containing protein 4	O60885	YES	NO	QLSLDINKLPGEK	617	-0.0446495	0.198905	0.0509771	0.208795	0.0811001	0.53552	0.0858904	0.566524	0.790953	0.0509771
BRD4	Bromodomain-containing protein 4	O60885	YES	NO	TPMDMGTIK	103	0.318412	0.160738	0.24371	0.181696	0.220276	0.131698	0.471073	0.346188	0.62407	0.24371
BRD4	Bromodomain-containing protein 4	O60885	YES	NO	HPTTPSSTAK	1209	0.110382	0.140342	0.103452	0.157877	0.416411	1.04384	0.329561	0.7952	0.832296	0.103452
BRD4	Bromodomain-containing protein 4	O60885	YES	NO	LNLPDYYK	92	-0.0512591	0.127086	0.184977	0.703421	0.216518	1.04513	0.206282	0.896205	0.301724	0.184977
BRD4	Bromodomain-containing protein 4	O60885	YES	NO	SREDEDALEQAR	1262	-0.0488604	0.105712	-0.0990733	0.355887	-0.0874884	0.318387	-0.162854	0.636572	0.493298	-0.0990733
BRD4	Bromodomain-containing protein 4	O60885	YES	NO	LMFSNCYK	424	0.0459441	0.0964961	-0.395644	1.08149	-0.100273	0.332511	0.0235072	0.0668036	0.482229	-0.395644
BRD4	Bromodomain-containing protein 4	O60885	YES	NO	AVHEQLAALSQPQQNKPK	520	-0.0343672	0.0799551	-0.0228103	0.0550914	-0.515484	0.992691	-0.0458302	0.184692	0.133368	-0.0228103
BRD4	Bromodomain-containing protein 4	O60885	YES	NO	YVTSCLRK	670	-0.215328	0.0640562	-1.25652	0.420242	-1.07705	0.492653	-1.01278	0.414059	1.05151	-1.25652
BRD4	Bromodomain-containing protein 4	O60885	YES	NO	RKPQAEKVDVIAGSSK	679	-0.0167838	0.0202938	-0.126301	0.204578	-0.172557	0.375362	0.0444617	0.073677	0.26649	-0.126301
BRD4	Bromodomain-containing protein 4	O60885	YES	NO	IHSPIIR	1115	0.00861048	0.0166885	0.182485	0.704989	0.0519927	0.17888	0.19324	0.695743	0.128241	0.182485
BRD4	Bromodomain-containing protein 4	O60885	YES	NO	LAELQEQLK	511	-0.000786797	0.00397196	0.0801182	0.520574	0.123847	1.13326	0.113891	1.02581	0.790643	0.0801182
ROCK2	Rho-associated protein kinase 2	O75116	YES	YES	KNEESQEIQKK	438	-0.904565	1.5936	-0.47716	0.695397	-0.481095	0.68681	-0.772134	1.20963	0.417136	-0.47716
ROCK2	Rho-associated protein kinase 2	O75116	YES	YES	VIQQSLEQEEAEHKATK	696	-0.920677	1.28814	-0.478866	0.568308	-0.888976	1.40646	-0.474738	0.830289	0.153882	-0.478866
ROCK2	Rho-associated protein kinase 2	O75116	YES	YES	IEQETQKR	796	-0.965756	1.26456	0.26422	0.244532	-0.451934	0.347867	-0.569991	0.437097	0.160807	0.26422
ROCK2	Rho-associated protein kinase 2	O75116	YES	YES	DVLNEDVR	783	2.47626	1.1901	1.01357	0.263288	0.988494	0.381829	2.4213	0.798263	0.877319	1.01357
ROCK2	Rho-associated protein kinase 2	O75116	YES	YES	AFVGNQLPFIGFTYYR	402	-1.35583	1.13748	-1.08575	0.834908	-1.01637	0.785075	-0.59879	0.78757	1.39597	-1.08575
ROCK2	Rho-associated protein kinase 2	O75116	YES	YES	IQQNQSIR	1369	-0.479853	1.13452	-0.0743058	0.149069	0.319449	0.806007	0.207135	0.394532	1.02378	-0.0743058
ROCK2	Rho-associated protein kinase 2	O75116	YES	YES	NCLLETAK	606	0.260728	1.123	-0.299064	0.749166	0.0829686	0.217789	0.101928	0.52591	0.0122522	-0.299064
ROCK2	Rho-associated protein kinase 2	O75116	YES	YES	QKDVLNEDVR	781	0.252287	1.00188	0.168535	0.585034	0.0894743	0.308723	0.0552076	0.207699	0.876229	0.168535
ROCK2	Rho-associated protein kinase 2	O75116	YES	YES	NLENDVNSLKDQLEDLK	528	-0.262898	0.973804	-0.00982172	0.0185089	-0.197744	1.04383	-0.0966937	0.342511	0.345799	-0.00982172
ROCK2	Rho-associated protein kinase 2	O75116	YES	YES	FYTAEVVLALDAIHSMGLIHR	193	-0.705919	0.924286	-0.573624	0.993177	-0.685722	1.39354	-0.617745	1.12493	1.10623	-0.573624
ROCK2	Rho-associated protein kinase 2	O75116	YES	YES	TLTSDVANLANEKEELNNK	977	-0.181932	0.857027	-0.0355981	0.0559744	-0.206897	1.0773	-0.209366	1.05699	0.337222	-0.0355981
ROCK2	Rho-associated protein kinase 2	O75116	YES	YES	NQNSQISTEK	547	-0.825361	0.754708	-0.115846	0.0647959	-0.213478	0.147662	-0.230806	0.165263	0.482335	-0.115846
ROCK2	Rho-associated protein kinase 2	O75116	YES	YES	GAFGEVQLVR	101	-0.505737	0.750245	-0.565242	0.879177	-0.818221	1.50043	-0.503177	0.806443	2.03504	-0.565242
ROCK2	Rho-associated protein kinase 2	O75116	YES	YES	ELQDQLEAEQYFSTLYK	861	-0.629809	0.739217	-0.0428689	0.0860574	0.0161274	0.0301972	0.0665038	0.132505	0.178511	-0.0428689
ROCK2	Rho-associated protein kinase 2	O75116	YES	YES	VIQQSLEQEEAEHK	696	0.318782	0.610296	0.0342641	0.0451064	0.122487	0.113568	-0.0950239	0.128598	0.040049	0.0342641
ROCK2	Rho-associated protein kinase 2	O75116	YES	YES	NDQWHWDNIR	356	-0.920369	0.581081	-0.569377	0.564014	0.533734	0.391617	-0.533854	0.437053	0.357064	-0.569377
ROCK2	Rho-associated protein kinase 2	O75116	YES	YES	NLTLKIEQETQKR	791	0.678684	0.575915	-0.859841	0.412448	-0.804171	0.390897	0.302653	0.217597	0.418564	-0.859841
ROCK2	Rho-associated protein kinase 2	O75116	YES	YES	LYTLEEHLSNEMQAK	449	0.36477	0.572819	0.126177	0.143187	0.361013	0.580191	0.150863	0.194321	0.00882069	0.126177
ROCK2	Rho-associated protein kinase 2	O75116	YES	YES	LTQQMIK	1077	0.795715	0.570582	0.714488	0.411845	0.423458	0.211233	0.672335	0.323777	0.683689	0.714488
ROCK2	Rho-associated protein kinase 2	O75116	YES	YES	IFQILYANEGESKK	1227	0.978612	0.563136	0.866106	0.49935	0.787776	0.439317	0.936576	0.54614	0.481978	0.866106
ROCK2	Rho-associated protein kinase 2	O75116	YES	YES	VENLLLEAEKR	750	-0.344027	0.544493	-0.391051	0.545247	-0.0274952	0.0370486	0.0177823	0.0227596	0.151459	-0.391051
ROCK2	Rho-associated protein kinase 2	O75116	YES	YES	QENNHLMEMK	829	-0.465054	0.536007	-0.36482	0.272746	0.213707	0.147897	0.555132	0.742508	0.158357	-0.36482
ROCK2	Rho-associated protein kinase 2	O75116	YES	YES	DSLAAQLEITLTKADSEQLAR	909	-0.267035	0.523379	-0.502586	0.506687	-0.96621	0.903793	-0.734436	1.27143	0.935964	-0.502586
ROCK2	Rho-associated protein kinase 2	O75116	YES	YES	NQNSQISTEKVNQLQR	547	-0.18817	0.52236	-0.0200674	0.0443743	0.0160652	0.0384116	-0.0300431	0.0933561	0.0946858	-0.0200674
ROCK2	Rho-associated protein kinase 2	O75116	YES	YES	LYTLEEHLSNEMQAKEELEQK	449	-0.480173	0.506157	0.166397	0.246998	-0.0281266	0.0242638	0.0741734	0.0983454	0.167761	0.166397
ROCK2	Rho-associated protein kinase 2	O75116	YES	YES	DSLAAQLEITLTK	909	-0.576522	0.483028	-0.530411	0.376213	-0.360278	0.703522	-0.878665	1.00995	1.28183	-0.530411
ROCK2	Rho-associated protein kinase 2	O75116	YES	YES	QLAPNKPS	1381	-0.242019	0.463868	-0.00546697	0.00917309	0.000141068	0.000269962	0.0287831	0.0577595	0.0798723	-0.00546697
ROCK2	Rho-associated protein kinase 2	O75116	YES	YES	HKQELTEKDATIASLEETNR	957	-0.149239	0.453205	0.283425	0.676049	-0.0241809	0.0698128	-0.155841	0.457415	0.0361807	0.283425
ROCK2	Rho-associated protein kinase 2	O75116	YES	YES	AFVGNQLPFIGFTYYRENLLLSDSPSCR	402	-1.7838	0.429118	-0.483398	0.592388	0.0916882	0.068344	0.0188471	0.0152026	0.503621	-0.483398
ROCK2	Rho-associated protein kinase 2	O75116	YES	YES	ICGLEEDLKNGK	648	0.140115	0.427219	-0.372191	0.758881	-0.0507874	0.0975079	-0.149806	0.479538	0.0385526	-0.372191
ROCK2	Rho-associated protein kinase 2	O75116	YES	YES	IELQMTLDSKDSDIEQLR	1103	-1.29761	0.420893	-0.110816	0.0295881	-0.458044	0.164167	-0.544384	0.169913	0.00598289	-0.110816
ROCK2	Rho-associated protein kinase 2	O75116	YES	YES	LADFGTCMK	230	-0.40516	0.413416	-0.760855	0.599949	-0.457317	0.423414	-0.360809	0.339651	0.909577	-0.760855
ROCK2	Rho-associated protein kinase 2	O75116	YES	YES	NLICAFLTDR	327	-0.134455	0.406971	-0.199974	0.680801	-0.1488	0.414252	0.0139588	0.0400752	0.373163	-0.199974
ROCK2	Rho-associated protein kinase 2	O75116	YES	YES	FTDLEKEK	676	0.130975	0.402006	-0.0670297	0.125953	0.0701961	0.207241	-0.0285685	0.0417027	0.0328615	-0.0670297
ROCK2	Rho-associated protein kinase 2	O75116	YES	YES	LEGWLSLPVR	1153	0.0774315	0.385925	0.0468757	0.190137	0.12028	0.837303	0.202773	1.50628	0.458617	0.0468757
ROCK2	Rho-associated protein kinase 2	O75116	YES	YES	SIAEEQYSDLEKEK	930	-0.118631	0.37319	0.0559586	0.175725	-0.0517307	0.178795	-0.0290967	0.130254	0.0249448	0.0559586
ROCK2	Rho-associated protein kinase 2	O75116	YES	YES	IYESIEEAKSEAMKEMEK	721	0.330437	0.350721	0.60983	0.855825	0.730705	1.116	0.394791	0.506579	0.826941	0.60983
ROCK2	Rho-associated protein kinase 2	O75116	YES	YES	MPGAPETAPGDGAGASR	10	-0.0892587	0.350184	-0.174022	0.683304	-0.0644557	0.227939	-0.00308267	0.00949356	0.191684	-0.174022
ROCK2	Rho-associated protein kinase 2	O75116	YES	YES	NLLLLANSTEEQQK	1326	0.0648729	0.349451	0.138554	0.819501	0.0168987	0.0838588	0.0466458	0.240293	0.0582546	0.138554
ROCK2	Rho-associated protein kinase 2	O75116	YES	YES	QLKQENNHLMEMK	826	-0.433962	0.346826	0.1969	0.167219	0.355213	0.477133	0.622991	0.897459	0.428137	0.1969
ROCK2	Rho-associated protein kinase 2	O75116	YES	YES	QIQQLESNNR	591	-0.0937135	0.33765	0.089019	0.322531	0.214128	1.04154	0.144281	0.967426	0.987352	0.089019
ROCK2	Rho-associated protein kinase 2	O75116	YES	YES	DATIASLEETNR	965	-0.0761678	0.331785	0.106569	0.725041	0.0488717	0.277447	0.0829981	0.539396	0.574422	0.106569
ROCK2	Rho-associated protein kinase 2	O75116	YES	YES	KEQEFPVEPVGEK	1240	-0.194683	0.319054	-0.0384235	0.0300525	0.0155801	0.0187765	0.0429569	0.0486983	0.0339343	-0.0384235
ROCK2	Rho-associated protein kinase 2	O75116	YES	YES	EFINLQSALESERR	619	0.0828909	0.314021	0.136032	0.573671	0.0977988	0.328097	0.0635157	0.199213	0.187913	0.136032
ROCK2	Rho-associated protein kinase 2	O75116	YES	YES	KQELQDERDSLAAQLEITLTK	901	-0.349427	0.312172	0.0853378	0.0612917	-0.657601	0.556022	-0.900573	0.93332	0.372157	0.0853378
ROCK2	Rho-associated protein kinase 2	O75116	YES	YES	MQTQQVNTLK	812	-0.0680097	0.280135	0.0274167	0.0883191	0.128064	0.73265	0.0990032	0.577043	0.258443	0.0274167
ROCK2	Rho-associated protein kinase 2	O75116	YES	YES	QKVENLLLEAEKR	748	0.0562011	0.271431	0.128865	0.756991	0.0641319	0.411887	-0.00764316	0.0379102	0.0968715	0.128865
ROCK2	Rho-associated protein kinase 2	O75116	YES	YES	EFINLQSALESER	619	-0.324183	0.25949	0.0904044	0.221947	0.130098	0.454124	0.148885	0.626572	1.0854	0.0904044
ROCK2	Rho-associated protein kinase 2	O75116	YES	YES	IYESIEEAK	721	0.0522787	0.23971	0.00906815	0.0321584	0.0787481	0.370002	0.00660043	0.021183	0.0126559	0.00906815
ROCK2	Rho-associated protein kinase 2	O75116	YES	YES	TLTSDVANLANEKEELNNKLK	977	-0.205796	0.231874	-0.131943	0.110868	0.019735	0.0139719	-0.381977	0.375974	0.0286169	-0.131943
ROCK2	Rho-associated protein kinase 2	O75116	YES	YES	LKDEEISAAAIK	1006	-0.0382953	0.231423	0.0576131	0.338259	0.0280421	0.156634	0.0205951	0.0972975	0.429754	0.0576131
ROCK2	Rho-associated protein kinase 2	O75116	YES	YES	KPPAPDPFAR	1351	0.0991346	0.224524	0.128664	0.250636	-0.0778601	0.177708	0.0627686	0.127681	0.287382	0.128664
ROCK2	Rho-associated protein kinase 2	O75116	YES	YES	IYESIEEAKSEAMK	721	0.136209	0.207427	-0.0408217	0.0483965	-0.165364	0.224659	-0.0879441	0.102633	0.17498	-0.0408217
ROCK2	Rho-associated protein kinase 2	O75116	YES	YES	KLHMELK	1065	0.132945	0.172311	0.109087	0.0980675	-0.0671039	0.0695281	0.0732926	0.0715603	0.356668	0.109087
ROCK2	Rho-associated protein kinase 2	O75116	YES	YES	ELEEEITLRK	483	-0.0514733	0.168979	0.123635	0.46804	0.0245211	0.0917871	0.0517943	0.176925	0.101189	0.123635
ROCK2	Rho-associated protein kinase 2	O75116	YES	YES	DVQEQLSR	998	0.153145	0.166377	-0.257544	0.396162	-0.230272	0.363416	-0.241718	0.368897	0.681987	-0.257544
ROCK2	Rho-associated protein kinase 2	O75116	YES	YES	QDADGQMKELQDQLEAEQYFSTLYK	853	-0.237375	0.165753	0.527237	0.397557	0.189684	0.15501	0.50023	0.33047	0.232105	0.527237
ROCK2	Rho-associated protein kinase 2	O75116	YES	YES	ICGLEEDLK	648	0.120107	0.141124	0.21957	0.20904	0.0610256	0.0371769	0.427814	0.753383	0.833822	0.21957
ROCK2	Rho-associated protein kinase 2	O75116	YES	YES	NLICAFLTDREVR	327	0.0540938	0.135717	-0.109397	0.379685	-0.266141	1.03602	-0.00269681	0.00658538	0.0790207	-0.109397
ROCK2	Rho-associated protein kinase 2	O75116	YES	YES	EQEFPVEPVGEK	1241	0.0738325	0.12978	0.0626983	0.110791	0.160789	0.40244	-0.0809808	0.15552	0.530328	0.0626983
ROCK2	Rho-associated protein kinase 2	O75116	YES	YES	CSLLDCDLK	761	0.0339659	0.127555	0.0694192	0.269572	0.153987	1.03103	0.0517849	0.261689	0.719493	0.0694192
ROCK2	Rho-associated protein kinase 2	O75116	YES	YES	IELQMTLDSK	1103	0.028915	0.123977	0.153448	0.960457	0.073926	0.483268	-0.0138157	0.0600029	0.145528	0.153448
ROCK2	Rho-associated protein kinase 2	O75116	YES	YES	IFQILYANEGESK	1227	-0.023117	0.119461	0.0250205	0.0901389	0.0130676	0.060398	0.0146325	0.0651793	0.498389	0.0250205
ROCK2	Rho-associated protein kinase 2	O75116	YES	YES	LKDVQEQLSR	996	-0.210424	0.113793	0.331817	0.459255	0.439733	0.682673	0.531526	0.893594	0.720669	0.331817
ROCK2	Rho-associated protein kinase 2	O75116	YES	YES	QLDETNALLR	563	0.0264596	0.109191	0.0530072	0.229518	0.0710628	0.483754	0.00962642	0.0487766	0.237936	0.0530072
ROCK2	Rho-associated protein kinase 2	O75116	YES	YES	DSDIEQLR	1113	0.0612714	0.106311	0.232584	0.707819	0.280205	0.86145	0.161825	0.455077	0.691644	0.232584
ROCK2	Rho-associated protein kinase 2	O75116	YES	YES	QNAELRK	844	-0.184424	0.10071	-1.08659	1.02211	-0.878825	0.748313	-0.70655	0.553227	1.74028	-1.08659
ROCK2	Rho-associated protein kinase 2	O75116	YES	YES	ELNEMQAQIAEESQIR	1087	-0.0280658	0.0873329	0.0855346	0.239635	0.153123	0.584558	0.104813	0.570392	0.265749	0.0855346
ROCK2	Rho-associated protein kinase 2	O75116	YES	YES	LFHVRPVTQTDVYR	1205	0.10514	0.0813122	-0.897052	0.836632	-0.240578	0.245946	0.0867395	0.0707635	0.0883007	-0.897052
ROCK2	Rho-associated protein kinase 2	O75116	YES	YES	SNMEIDMTYQLK	684	0.0214648	0.0625267	-0.000593993	0.00147655	0.0109005	0.0329228	-0.0151415	0.051593	0.115621	-0.000593993
ROCK2	Rho-associated protein kinase 2	O75116	YES	YES	EKALLQHK	504	0.0781513	0.0599381	0.459835	0.539097	-0.125483	0.125055	0.12517	0.116998	0.175673	0.459835
ROCK2	Rho-associated protein kinase 2	O75116	YES	YES	DLQDKNCLLETAK	601	-0.0234748	0.058711	-0.150976	0.482325	-0.0443642	0.149438	-0.17479	0.38424	0.135658	-0.150976
ROCK2	Rho-associated protein kinase 2	O75116	YES	YES	KSVESALR	492	0.0201031	0.0484342	-0.111993	0.353787	0.129524	0.320423	0.218289	1.055	0.811824	-0.111993
ROCK2	Rho-associated protein kinase 2	O75116	YES	YES	SIAEEQYSDLEK	930	-0.0531531	0.0407811	-0.83423	0.633554	-0.622388	0.703089	-0.456888	0.352835	0.384219	-0.83423
ROCK2	Rho-associated protein kinase 2	O75116	YES	YES	CLTQNDLK	804	-0.020494	0.0391845	-0.123775	0.249334	0.144048	0.470836	0.205199	0.680773	0.0483771	-0.123775
ROCK2	Rho-associated protein kinase 2	O75116	YES	YES	SVESALR	493	0.133755	0.031926	-0.118661	0.0456818	-0.316832	0.134682	0.413429	0.183495	0.115496	-0.118661
ROCK2	Rho-associated protein kinase 2	O75116	YES	YES	LAEIMNRK	1038	0.0140668	0.0179064	-0.098896	0.0643871	0.356542	0.748177	0.13592	0.128028	0.112006	-0.098896
ROCK2	Rho-associated protein kinase 2	O75116	YES	YES	ELEEEITLR	483	-0.00588189	0.0169745	0.069372	0.242506	0.0172141	0.0392022	0.00678855	0.0162812	0.0588647	0.069372
ROCK2	Rho-associated protein kinase 2	O75116	YES	YES	LAEIMNR	1038	0.00536395	0.0121846	0.144048	0.359471	0.260641	1.35748	0.129241	0.742537	1.30257	0.144048
ROCK2	Rho-associated protein kinase 2	O75116	YES	YES	KNEESQEIQK	438	0.0185083	0.0103471	-0.536781	0.537956	0.890781	1.32602	0.38989	0.390845	0.181402	-0.536781
ROCK2	Rho-associated protein kinase 2	O75116	YES	YES	DRTHGSEIINDLQGR	633	0.00296669	0.00992554	0.0985746	0.445297	0.015588	0.0558458	-0.00291942	0.00915115	0.0369237	0.0985746
ROCK2	Rho-associated protein kinase 2	O75116	YES	YES	THGSEIINDLQGR	635	0.00275363	0.00696433	0.116836	0.45704	-0.0024285	0.00698655	-0.096808	0.389828	0.167726	0.116836
ULK1	Serine/threonine-protein kinase ULK1	O75385	YES	YES	NLQSPTQFQTPR	447	1.19254	0.668813	-0.0240055	0.00751495	0.725601	0.363106	0.977225	0.51197	0.494954	-0.0240055
ULK1	Serine/threonine-protein kinase ULK1	O75385	YES	YES	TPSSQNLLALLAR	636	0.800615	0.630376	0.737248	0.554355	0.855935	0.648018	1.03787	0.848717	0.981759	0.737248
ULK1	Serine/threonine-protein kinase ULK1	O75385	YES	YES	LPDFLQR	608	0.293457	0.554386	0.16679	0.257881	0.337496	0.986918	0.472334	1.3804	1.11166	0.16679
ULK1	Serine/threonine-protein kinase ULK1	O75385	YES	YES	IADFGFAR	163	-0.666338	0.514071	-0.54101	0.718404	-1.72664	2.81353	-1.83855	1.9536	2.10222	-0.54101
ULK1	Serine/threonine-protein kinase ULK1	O75385	YES	YES	LTDLLLK	698	0.663722	0.498281	-0.321629	0.168992	-0.310959	0.212412	-0.222462	0.151818	0.228901	-0.321629
ULK1	Serine/threonine-protein kinase ULK1	O75385	YES	YES	TLVPTIPR	238	-0.137812	0.234703	-0.462847	1.1185	-0.805609	2.20282	-0.862444	2.08416	2.47958	-0.462847
ULK1	Serine/threonine-protein kinase ULK1	O75385	YES	YES	SGSTSPLGFAR	465	0.388956	0.189949	0.463705	0.289062	0.0519716	0.0215082	-0.646217	0.510248	0.80202	0.463705
ULK1	Serine/threonine-protein kinase ULK1	O75385	YES	YES	LFLQQIAGAMR	117	-0.145052	0.0572489	-1.13032	0.561944	-0.81166	0.441332	-1.21148	0.668348	0.69987	-1.13032
ULK1	Serine/threonine-protein kinase ULK1	O75385	YES	YES	QLLLALLQR	253	-0.0473401	0.049055	-0.141777	0.182077	-0.14301	0.161559	0.443741	0.48149	0.571296	-0.141777
ULK1	Serine/threonine-protein kinase ULK1	O75385	YES	YES	TLSEDTIR	109	-0.127083	0.0212047	-0.760007	0.128191	-0.220558	0.0345692	-0.245476	0.0376985	0.0731571	-0.760007
ULK1	Serine/threonine-protein kinase ULK1	O75385	YES	YES	MFSAGPTGSASSSAR	773	0.00310471	0.0054363	-0.276253	0.676068	-0.147426	0.323006	-0.148657	0.355656	0.469953	-0.276253
RPS6KA5	Ribosomal protein S6 kinase alpha-5	O75582	YES	YES	EFVADETER	201	0.745007	0.321278	0.226428	0.086435	-0.554918	0.355708	-0.976652	0.440654	0.330185	0.226428
RPS6KA5	Ribosomal protein S6 kinase alpha-5	O75582	YES	YES	LFQGYSFVAPSILFKR	371	-0.344539	0.24376	-0.0160999	0.0151951	-0.0519326	0.0461154	0.292504	0.392822	0.243022	-0.0160999
RPS6KA5	Ribosomal protein S6 kinase alpha-5	O75582	YES	YES	NAAVIDPLQFHMGVERPGVTNVAR	387	-0.122727	0.148849	0.181769	0.203372	-0.50713	0.483012	-0.0295977	0.0263905	0.287986	0.181769
RPS6KA5	Ribosomal protein S6 kinase alpha-5	O75582	YES	YES	IIDFGFAR	563	-0.0618609	0.144799	-0.00856824	0.0172484	0.190307	0.973994	0.131977	0.511063	0.154599	-0.00856824
RPS6KA5	Ribosomal protein S6 kinase alpha-5	O75582	YES	YES	INWDDLAAK	321	0.244161	0.138358	-0.546429	0.244175	-0.167717	0.0787623	0.657275	0.449763	0.0176625	-0.546429
RPS6KA5	Ribosomal protein S6 kinase alpha-5	O75582	YES	YES	DLKPENLLFTDENDNLEIK	544	0.147306	0.0432876	1.88066	1.09839	-0.226548	0.0550283	1.38456	0.766655	0.0366922	1.88066
RPS6KA5	Ribosomal protein S6 kinase alpha-5	O75582	YES	YES	DLIQGLLTVDPNKR	662	-0.038141	0.0424908	0.360069	0.694241	0.367531	0.689912	0.20562	0.331601	0.360683	0.360069
RPS6KA5	Ribosomal protein S6 kinase alpha-5	O75582	YES	YES	SLTCTSAVEIMKK	628	0.031649	0.0376386	0.11257	0.146535	0.329669	0.900478	0.0519693	0.0478808	0.246891	0.11257
TRIO	Triple functional domain protein	O75962	YES	YES	ASLGTLPLGKPR	2439	0.773094	1.09824	0.684754	0.918771	0.13744	0.104831	0.032775	0.018847	0.459677	0.684754
TRIO	Triple functional domain protein	O75962	YES	YES	SLQLDIIPASIPGSEVK	1258	0.403801	0.75381	0.267059	0.462091	0.603237	1.3957	0.269279	0.326028	1.05877	0.267059
TRIO	Triple functional domain protein	O75962	YES	YES	KASLDTSELER	2120	1.54785	0.725024	1.66783	0.777177	1.13028	0.485174	1.83129	0.897547	0.790222	1.66783
TRIO	Triple functional domain protein	O75962	YES	YES	WGSLTEGK	2884	0.450494	0.405041	-0.751989	0.333223	-0.781046	0.416746	0.263603	0.212867	0.266562	-0.751989
TRIO	Triple functional domain protein	O75962	YES	YES	TSEQVCSVLESLEQEYK	1019	0.614658	0.302705	0.0998965	0.0296152	0.377602	0.159719	-0.838298	0.353778	0.776539	0.0998965
TRIO	Triple functional domain protein	O75962	YES	YES	LQLTDLLIKPVQR	2091	-0.218077	0.0914366	0.318465	0.158907	0.158017	0.0668559	0.378131	0.211661	0.217527	0.318465
TRIO	Triple functional domain protein	O75962	YES	YES	VLGPGMDGIMVTWKDNFDSFYSEVAELGR	2776	-0.0925544	0.0454673	-0.284095	0.277097	-1.14237	0.529593	0.316536	0.288641	0.146335	-0.284095
TRIO	Triple functional domain protein	O75962	YES	YES	DLADIAAFFR	42	0.00693578	0.0107507	0.0325529	0.045403	0.12686	0.28465	0.19716	0.440075	0.171248	0.0325529
TRIO	Triple functional domain protein	O75962	YES	YES	GRNEGLSSGTLSK	1834	-0.0136903	0.00921168	0.535384	0.741716	-0.302188	0.267054	0.0921439	0.0833554	0.139772	0.535384
TRIO	Triple functional domain protein	O75962	YES	YES	LLVRPTSSETPSAAELVSAIEELVK	1894	0.00275278	0.0036684	-0.254456	0.480544	0.24036	0.48534	-0.0152568	0.0242268	0.0959119	-0.254456
STK17B	Serine/threonine-protein kinase 17B	O94768	YES	YES	IVDFGMSR	177	-1.74297	1.08852	-4.23474	5.66142	-3.37831	4.99989	-3.05291	3.49151	5.31401	-4.23474
STK17B	Serine/threonine-protein kinase 17B	O94768	YES	YES	AEILHEIAVLELAK	75	-0.872627	0.964846	0.0871385	0.0600355	0.0321757	0.0277921	0.445145	0.515387	0.0170314	0.0871385
STK17B	Serine/threonine-protein kinase 17B	O94768	YES	YES	FRFDDSLPNPHELVSDLLC	354	-0.405908	0.378198	0.00298129	0.00354634	-0.119763	0.134209	-0.343824	0.551713	0.0650166	0.00298129
STK10	Serine/threonine-protein kinase 10	O94804	YES	YES	GLTEPQIQVVCR	128	-2.58721	2.54653	-3.03713	2.37151	-2.90235	2.53066	-1.43867	0.862058	2.52936	-3.03713
STK10	Serine/threonine-protein kinase 10	O94804	YES	YES	LLGAYYHDGK	96	-2.17891	1.39446	-1.35901	0.732138	-1.34123	0.604583	-0.363819	0.137551	0.151159	-1.35901
STK10	Serine/threonine-protein kinase 10	O94804	YES	YES	RFEQEINAK	597	0.291763	1.12343	0.0777891	0.166449	0.034394	0.0939131	-0.11294	0.233234	0.302935	0.0777891
STK10	Serine/threonine-protein kinase 10	O94804	YES	YES	EQEMFFK	934	0.594476	1.01244	0.493493	0.793895	0.421831	0.578433	0.58221	0.943797	0.87212	0.493493
STK10	Serine/threonine-protein kinase 10	O94804	YES	YES	DREAALWEMEEHQLQER	738	0.471753	0.922553	0.505653	0.610814	0.649037	1.45252	0.634763	1.28034	1.39668	0.505653
STK10	Serine/threonine-protein kinase 10	O94804	YES	YES	KFVVDGVEVSITTSK	532	-0.903173	0.825754	-0.873681	0.779517	0.152908	0.344208	-0.284215	0.456493	0.16029	-0.873681
STK10	Serine/threonine-protein kinase 10	O94804	YES	YES	LLQKEEHR	571	0.374374	0.732237	0.219808	0.383544	0.181816	0.323939	0.157954	0.271905	0.158456	0.219808
STK10	Serine/threonine-protein kinase 10	O94804	YES	YES	SLHINGGGSAAEQR	824	0.386408	0.5248	-0.399037	0.542489	-0.186921	0.290512	-0.120428	0.200137	1.56302	-0.399037
STK10	Serine/threonine-protein kinase 10	O94804	YES	YES	LSEEAECPNPSTPSK	941	0.361803	0.446098	-0.333177	0.196746	0.406429	0.560037	-0.274904	0.204964	0.436229	-0.333177
STK10	Serine/threonine-protein kinase 10	O94804	YES	YES	ALDESHNQNLK	901	-0.431355	0.433437	0.861294	1.16739	0.454614	0.350195	0.990664	1.46317	0.31546	0.861294
STK10	Serine/threonine-protein kinase 10	O94804	YES	YES	QLLDRDFVAK	692	0.400682	0.429656	0.0217811	0.0184779	0.357333	0.446672	0.508964	0.705096	0.0297545	0.0217811
STK10	Serine/threonine-protein kinase 10	O94804	YES	YES	SLQTTSPPVVAPGNENGLAVPVPLRK	387	-0.403735	0.428467	0.00331034	0.00308395	-0.511229	0.55061	-0.336295	0.506182	1.08162	0.00331034
STK10	Serine/threonine-protein kinase 10	O94804	YES	YES	FVVDGVEVSITTSK	533	0.238458	0.411133	0.227453	0.414903	-0.127926	0.174441	-0.159629	0.309465	0.575219	0.227453
STK10	Serine/threonine-protein kinase 10	O94804	YES	YES	AFANFRR	2	-0.472233	0.331368	-0.0884149	0.0590127	-0.305812	0.424604	-0.103008	0.119776	0.181825	-0.0884149
STK10	Serine/threonine-protein kinase 10	O94804	YES	YES	DQYFLQR	764	0.28486	0.302821	-0.00567333	0.00652122	-0.586379	1.07677	-0.517022	0.717421	0.183156	-0.00567333
STK10	Serine/threonine-protein kinase 10	O94804	YES	YES	LANGSLEPPAQAAPGPSKR	465	-0.275568	0.29876	-0.729663	0.869631	-0.127306	0.110356	0.299769	0.369882	0.0516821	-0.729663
STK10	Serine/threonine-protein kinase 10	O94804	YES	YES	QQLKDQYFLQR	760	-0.134168	0.170528	-0.0634783	0.0774522	0.108704	0.187147	-0.144628	0.21271	0.112097	-0.0634783
STK10	Serine/threonine-protein kinase 10	O94804	YES	YES	IQVAQEK	422	-0.157095	0.150998	-0.335212	0.34811	0.36323	0.259261	-0.505876	0.624456	0.584204	-0.335212
STK10	Serine/threonine-protein kinase 10	O94804	YES	YES	IISEDEKKDEEMR	547	0.31387	0.149643	0.46883	0.288209	1.16375	0.904271	0.698837	0.421701	0.163741	0.46883
STK10	Serine/threonine-protein kinase 10	O94804	YES	YES	QVAEQGGDLSPAANR	429	-0.0374359	0.0150155	0.27907	0.165982	0.71496	0.582796	0.667931	0.516185	0.581866	0.27907
STK10	Serine/threonine-protein kinase 10	O94804	YES	YES	FFDTELENLER	608	0.00179918	0.00632337	0.038553	0.183391	0.0172546	0.079041	0.0925827	0.53235	0.25809	0.038553
STK10	Serine/threonine-protein kinase 10	O94804	YES	YES	SRPVSMDAR	413	0.00995587	0.00400605	1.34964	0.718167	-0.894521	0.627059	0.437879	0.240902	0.236043	1.34964
NADK	NAD kinase	O95544	NO	YES	ACVLQNPQTIMHIQDPASQR	78	-0.657319	0.691613	-1.77146	1.17826	-0.729448	0.664574	-0.780789	1.08202	0.348658	-1.77146
NADK	NAD kinase	O95544	NO	YES	ELSPDAAAYCCSACHGDETWSYNHPIR	13	0.590901	0.527724	0.350152	0.295251	0.294742	0.315277	0.78236	1.14826	0.513019	0.350152
NADK	NAD kinase	O95544	NO	YES	SLSASPALGSTK	46	0.170627	0.505639	-0.00322807	0.00650692	-0.0107686	0.0253928	0.132792	0.419569	0.142155	-0.00322807
NADK	NAD kinase	O95544	NO	YES	SLHGPCPVTTFGPK	64	-0.516183	0.41119	0.274281	0.202758	0.57235	0.404831	0.478052	0.340728	0.665856	0.274281
OXSR1	Serine/threonine-protein kinase OSR1	O95747	YES	YES	EVLEGLEYLHKNGQIHR	129	-1.99441	3.41838	-0.950903	1.20743	-0.947971	0.837886	-0.914068	0.827776	1.12773	-0.950903
OXSR1	Serine/threonine-protein kinase OSR1	O95747	YES	YES	TAQALSSGSGSQETKIPISLVLR	417	-0.181452	1.24526	-0.149281	0.490514	-0.296885	1.85981	-0.352988	2.31228	1.49736	-0.149281
OXSR1	Serine/threonine-protein kinase OSR1	O95747	YES	YES	ELNDIRFEFTPGRDTAEGVSQELISAGLVDGR	446	-0.47744	1.08118	-0.089137	0.130116	-0.441759	0.997945	-0.548611	1.43161	1.12714	-0.089137
OXSR1	Serine/threonine-protein kinase OSR1	O95747	YES	YES	ADIWSFGITAIELATGAAPYHK	208	-0.98252	0.882574	0.304243	0.325827	-0.191636	0.201125	-0.331437	0.530654	0.508272	0.304243
OXSR1	Serine/threonine-protein kinase OSR1	O95747	YES	YES	LLSGGSVLDIIK	94	-0.362708	0.763007	-0.119199	0.285036	-0.331812	1.48009	-0.959452	3.63506	4.41915	-0.119199
OXSR1	Serine/threonine-protein kinase OSR1	O95747	YES	YES	MISLCLQKDPEKRPTAAELLR	267	-0.224914	0.751409	0.00994417	0.0181532	-0.167605	0.510336	-0.499735	1.91905	1.93887	0.00994417
OXSR1	Serine/threonine-protein kinase OSR1	O95747	YES	YES	TFVGTPCWMAPEVMEQVR	185	0.18363	0.708912	0.0873108	0.175702	0.273229	1.36821	0.282836	1.38162	0.820584	0.0873108
OXSR1	Serine/threonine-protein kinase OSR1	O95747	YES	YES	VLMLTLQNDPPSLETGVQDKEMLK	235	-0.660502	0.706569	0.119253	0.108594	-0.538737	0.862599	-0.709956	0.852496	1.32802	0.119253
OXSR1	Serine/threonine-protein kinase OSR1	O95747	YES	YES	LIGFAQLSIS	518	-0.702648	0.699812	-0.0680326	0.0892754	-0.0766502	0.125851	0.0522449	0.0737479	0.382731	-0.0680326
OXSR1	Serine/threonine-protein kinase OSR1	O95747	YES	YES	ELNDIRFEFTPGR	446	-0.23881	0.656546	-0.127899	0.261065	-0.0859475	0.21136	0.0482969	0.107226	0.191815	-0.127899
OXSR1	Serine/threonine-protein kinase OSR1	O95747	YES	YES	IVEEPQSNR	489	-0.285437	0.627597	-0.189983	0.435574	0.181436	0.399613	0.135111	0.267862	0.829758	-0.189983
OXSR1	Serine/threonine-protein kinase OSR1	O95747	YES	YES	CQTSMDELLK	53	-0.362061	0.480474	-0.0569784	0.100872	-0.0176491	0.0333962	-0.669044	1.99967	2.15491	-0.0569784
OXSR1	Serine/threonine-protein kinase OSR1	O95747	YES	YES	DPEKRPTAAELLR	275	0.259752	0.432159	-0.0290179	0.0359747	-0.489704	0.756083	-0.991762	1.4884	1.37822	-0.0290179
OXSR1	Serine/threonine-protein kinase OSR1	O95747	YES	YES	LASGVEGSDIPDDGK	503	0.125282	0.398529	-0.232442	0.640859	-0.361326	1.41426	-0.111982	0.315446	0.890892	-0.232442
OXSR1	Serine/threonine-protein kinase OSR1	O95747	YES	YES	IPISLVLR	432	0.0788665	0.371593	0.0309765	0.120871	0.0815038	0.509299	0.107232	0.868474	0.496291	0.0309765
OXSR1	Serine/threonine-protein kinase OSR1	O95747	YES	YES	TAQALSSGSGSQETK	417	-0.177503	0.353247	-0.18856	0.368459	0.236778	0.510127	0.191034	0.316956	0.901673	-0.18856
OXSR1	Serine/threonine-protein kinase OSR1	O95747	YES	YES	VLMLTLQNDPPSLETGVQDKEMLKK	235	-0.302937	0.325038	-0.0125307	0.00925543	-0.434224	0.575102	-0.868005	1.28233	1.14005	-0.0125307
OXSR1	Serine/threonine-protein kinase OSR1	O95747	YES	YES	EVLEGLEYLHK	129	-0.063608	0.324424	0.00977948	0.0500487	-0.185847	1.63185	-0.419791	3.97003	4.19414	0.00977948
OXSR1	Serine/threonine-protein kinase OSR1	O95747	YES	YES	DLVIVAANLQK	478	-0.0450101	0.322243	-0.0092128	0.0435322	-0.0377501	0.343495	-0.00377994	0.023531	0.559535	-0.0092128
OXSR1	Serine/threonine-protein kinase OSR1	O95747	YES	YES	ADIWSFGITAIELATGAAPYHKYPPMK	208	-0.239654	0.293602	0.0358552	0.0605851	-0.237659	0.687031	-0.806916	2.54147	1.5595	0.0358552
OXSR1	Serine/threonine-protein kinase OSR1	O95747	YES	YES	NKEFLQEK	296	0.0412608	0.178701	0.173732	0.742887	0.280095	1.79499	0.0752327	0.217627	0.680177	0.173732
OXSR1	Serine/threonine-protein kinase OSR1	O95747	YES	YES	KTFVGTPCWMAPEVMEQVR	184	-0.129363	0.178635	-0.0807113	0.141638	-0.114621	0.263253	-0.320078	1.51873	1.19	-0.0807113
OXSR1	Serine/threonine-protein kinase OSR1	O95747	YES	YES	DTAEGVSQELISAGLVDGR	459	-0.210591	0.14725	-0.378051	0.284457	-0.304475	0.246225	0.147683	0.123258	0.0582753	-0.378051
OXSR1	Serine/threonine-protein kinase OSR1	O95747	YES	YES	VLMLTLQNDPPSLETGVQDK	235	-0.205884	0.0582089	0.503589	0.175853	-0.275335	0.097776	-0.642898	0.271203	0.343263	0.503589
OXSR1	Serine/threonine-protein kinase OSR1	O95747	YES	YES	AGNILLGEDGSVQIADFGVSAFLATGGDITR	149	0.0824833	0.0372018	0.857322	1.08758	0.0594265	0.0264966	-0.0390739	0.0223469	0.351235	0.857322
OXSR1	Serine/threonine-protein kinase OSR1	O95747	YES	YES	FEFTPGRDTAEGVSQELISAGLVDGR	452	-0.00860516	0.0206701	0.04714	0.122085	-0.135311	0.481597	-0.114809	0.371776	0.770656	0.04714
OXSR1	Serine/threonine-protein kinase OSR1	O95747	YES	YES	SGVLDESTIATILR	115	-0.000318768	0.00185652	-0.0245131	0.0953782	-0.100535	1.07261	-0.276707	2.58922	3.58663	-0.0245131
OXSR1	Serine/threonine-protein kinase OSR1	O95747	YES	YES	MISLCLQK	267	0.000614639	0.000470092	-0.0341117	0.046369	0.299367	0.375044	-0.196707	0.399589	0.537549	-0.0341117
MAP4K4	Mitogen-activated protein kinase kinase kinase kinase 4	O95819	YES	YES	DPAGIFELVEVVGNGTYGQVYK	20	1.43014	1.54569	-0.615674	0.467143	0.557555	0.303753	-0.0632486	0.0219239	0.185448	-0.615674
MAP4K4	Mitogen-activated protein kinase kinase kinase kinase 4	O95819	YES	YES	EVFRPLKPADLTALAK	732	0.367196	1.30111	0.337283	0.776734	0.175164	0.46927	-0.219616	0.229405	1.77712	0.337283
MAP4K4	Mitogen-activated protein kinase kinase kinase kinase 4	O95819	YES	YES	NYMQRPSTEQLLK	273	0.692232	0.897915	0.624723	0.641659	0.397141	0.434689	0.389714	0.431263	0.836479	0.624723
MAP4K4	Mitogen-activated protein kinase kinase kinase kinase 4	O95819	YES	YES	DSPLQGSGQQNSQAGQR	638	-0.477598	0.717577	-0.164479	0.253749	0.0501254	0.100336	-0.125197	0.26139	0.252632	-0.164479
MAP4K4	Mitogen-activated protein kinase kinase kinase kinase 4	O95819	YES	YES	EQEYIRR	464	-0.830718	0.657121	-0.733216	0.598925	-0.101765	0.0721253	0.111637	0.0961844	0.436556	-0.733216
MAP4K4	Mitogen-activated protein kinase kinase kinase kinase 4	O95819	YES	YES	FFSFIEGCLVK	262	0.119341	0.654745	0.00228315	0.00593359	0.0779171	0.485211	0.0678039	0.409501	0.0370128	0.00228315
MAP4K4	Mitogen-activated protein kinase kinase kinase kinase 4	O95819	YES	YES	GLAHLHIHHVIHR	140	0.658802	0.611746	0.769069	0.764099	0.385829	0.406654	0.0919452	0.059057	0.325146	0.769069
MAP4K4	Mitogen-activated protein kinase kinase kinase kinase 4	O95819	YES	YES	EDWIAYISR	127	0.669122	0.592532	0.426625	0.381953	1.5539	1.66161	1.09183	1.36008	1.35692	0.426625
MAP4K4	Mitogen-activated protein kinase kinase kinase kinase 4	O95819	YES	YES	GQNVLLTENAEVK	156	-0.105829	0.540019	-0.16092	1.65471	-0.197083	2.51009	-0.156142	1.9938	1.45361	-0.16092
MAP4K4	Mitogen-activated protein kinase kinase kinase kinase 4	O95819	YES	YES	GSVVNVNPTNTRPQSDTPEIR	899	-0.631414	0.530202	-0.69321	0.458841	-0.183485	0.173213	-0.22412	0.200168	0.12896	-0.69321
MAP4K4	Mitogen-activated protein kinase kinase kinase kinase 4	O95819	YES	YES	SKPSFHAPEPK	547	0.370304	0.456726	0.16175	0.172038	-0.0315678	0.0315611	-1.02209	0.836836	0.282161	0.16175
MAP4K4	Mitogen-activated protein kinase kinase kinase kinase 4	O95819	YES	YES	LVPRPGSGSSSGSSNSGSQPGSHPGSQSGSGER	671	-0.274763	0.377804	-0.431769	0.789291	-0.300013	0.976395	-0.495015	1.31834	1.59796	-0.431769
MAP4K4	Mitogen-activated protein kinase kinase kinase kinase 4	O95819	YES	YES	SGGSSQVYFMTLGR	1220	0.459236	0.356138	-0.847653	0.452423	0.367471	0.25004	-0.426391	0.231929	0.468639	-0.847653
MAP4K4	Mitogen-activated protein kinase kinase kinase kinase 4	O95819	YES	YES	NIATYYGAFIKK	81	-0.150428	0.31359	0.0282533	0.0441121	-0.0352878	0.0536987	-0.0605806	0.0992067	0.00814848	0.0282533
MAP4K4	Mitogen-activated protein kinase kinase kinase kinase 4	O95819	YES	YES	LVDFGVSAQLDR	169	-0.0799496	0.309939	-0.0631009	0.255301	-0.0433185	0.190741	-0.0654285	0.259265	0.293239	-0.0631009
MAP4K4	Mitogen-activated protein kinase kinase kinase kinase 4	O95819	YES	YES	VYYLSWLR	991	-0.743731	0.307432	0.91502	0.374872	0.451697	0.226181	0.367555	0.127388	0.126898	0.91502
MAP4K4	Mitogen-activated protein kinase kinase kinase kinase 4	O95819	YES	YES	IQLKDHIDR	300	0.144115	0.256244	0.133638	0.252297	-0.186688	0.373305	-0.297938	0.675732	0.0206701	0.133638
MAP4K4	Mitogen-activated protein kinase kinase kinase kinase 4	O95819	YES	YES	SLVDIDLSSLR	9	0.494778	0.233181	-1.24136	0.681268	-0.90479	0.460232	-0.732302	0.280386	0.183755	-1.24136
MAP4K4	Mitogen-activated protein kinase kinase kinase kinase 4	O95819	YES	YES	QTQSASSTLQK	839	0.27167	0.228079	0.0684551	0.0471995	0.607525	0.729268	0.0786753	0.0689446	0.49154	0.0684551
MAP4K4	Mitogen-activated protein kinase kinase kinase kinase 4	O95819	YES	YES	QQLLQEQQLR	373	0.0545676	0.221866	-0.0287356	0.0791255	0.122761	0.518957	0.02954	0.116359	0.164836	-0.0287356
MAP4K4	Mitogen-activated protein kinase kinase kinase kinase 4	O95819	YES	YES	KGSVVNVNPTNTRPQSDTPEIR	898	-0.254684	0.218804	-0.027042	0.0244014	-0.270098	0.321897	-0.435127	0.545647	0.0593047	-0.027042
MAP4K4	Mitogen-activated protein kinase kinase kinase kinase 4	O95819	YES	YES	SSSSFTPFIDPR	852	0.0357009	0.21145	0.0800658	0.428504	0.135808	1.61177	0.0889801	0.875382	0.753724	0.0800658
MAP4K4	Mitogen-activated protein kinase kinase kinase kinase 4	O95819	YES	YES	ALFLIPR	241	0.0363386	0.16135	0.00861798	0.019143	0.003967	0.0242994	0.0962489	0.826806	0.100227	0.00861798
MAP4K4	Mitogen-activated protein kinase kinase kinase kinase 4	O95819	YES	YES	SPPGHDDQLWLVMEFCGAGSITDLVKNTK	93	-0.16446	0.149373	0.675513	0.634748	0.417908	0.317457	1.19073	1.51043	1.46186	0.675513
MAP4K4	Mitogen-activated protein kinase kinase kinase kinase 4	O95819	YES	YES	GNTLKEDWIAYISR	122	0.0453479	0.144952	0.110543	0.486956	0.196966	1.00732	0.0189252	0.0701175	0.306696	0.110543
MAP4K4	Mitogen-activated protein kinase kinase kinase kinase 4	O95819	YES	YES	DIKGQNVLLTENAEVK	153	-0.0562096	0.135887	0.043171	0.0974134	-0.0466442	0.10507	-0.0152037	0.0449763	0.222312	0.043171
MAP4K4	Mitogen-activated protein kinase kinase kinase kinase 4	O95819	YES	YES	HLEVLQQQLLQEQAMLLECR	478	0.0719148	0.133642	0.135662	0.249156	0.143919	0.313006	-0.056293	0.0914191	0.150504	0.135662
MAP4K4	Mitogen-activated protein kinase kinase kinase kinase 4	O95819	YES	YES	AASSLNLSNGETESVK	798	-0.0381447	0.0993641	-0.0648768	0.132955	-0.0164074	0.0316662	0.0793728	0.173227	0.0076121	-0.0648768
MAP4K4	Mitogen-activated protein kinase kinase kinase kinase 4	O95819	YES	YES	RQQLLQEQQLR	372	-0.0646634	0.0932746	-0.316036	0.500183	-0.0481505	0.0846445	0.16873	0.401389	0.0625324	-0.316036
MAP4K4	Mitogen-activated protein kinase kinase kinase kinase 4	O95819	YES	YES	TMIVHDDVESEPAMTPSK	814	0.112139	0.0836837	-0.127605	0.0784588	-0.0454474	0.0312955	0.155966	0.122852	0.150083	-0.127605
MAP4K4	Mitogen-activated protein kinase kinase kinase kinase 4	O95819	YES	YES	RPHPQHSQQPPPPQQER	530	0.0613045	0.0705424	-0.158774	0.232954	-0.0739818	0.114806	-0.169536	0.323709	0.437323	-0.158774
MAP4K4	Mitogen-activated protein kinase kinase kinase kinase 4	O95819	YES	YES	TGQLAAIK	47	0.0186272	0.067705	-0.173689	0.719828	-0.0931677	0.52171	-0.0839285	0.38011	0.408053	-0.173689
MAP4K4	Mitogen-activated protein kinase kinase kinase kinase 4	O95819	YES	YES	QLQQEQAYLLSLQHDHR	513	-0.0280629	0.0462288	0.293928	0.721613	0.24485	0.586298	-0.121359	0.179229	0.462521	0.293928
MAP4K4	Mitogen-activated protein kinase kinase kinase kinase 4	O95819	YES	YES	KFFSFIEGCLVK	261	0.0158092	0.034326	0.132415	0.343762	0.00579873	0.0134556	0.0447895	0.119493	0.733278	0.132415
MAP4K4	Mitogen-activated protein kinase kinase kinase kinase 4	O95819	YES	YES	EGTLIVR	832	-0.0441384	0.0158661	0.79629	0.413469	0.0556665	0.0243909	0.727966	0.414493	0.293729	0.79629
MAP4K4	Mitogen-activated protein kinase kinase kinase kinase 4	O95819	YES	YES	NIATYYGAFIK	81	0.00705901	0.0107469	-0.0220135	0.037974	0.00370796	0.0064038	0.000662626	0.00101359	0.252622	-0.0220135
LATS1	Serine/threonine-protein kinase LATS1	O95835	YES	YES	MGIFPESLAR	797	-2.04516	1.29607	-3.11142	2.58863	-2.81463	3.97162	-3.77989	4.94213	3.11081	-3.11142
LATS1	Serine/threonine-protein kinase LATS1	O95835	YES	YES	YSGNMEYVISR	277	-0.789585	1.13339	-0.435604	0.297548	0.0939184	0.106998	-0.45557	0.488318	0.111276	-0.435604
LATS1	Serine/threonine-protein kinase LATS1	O95835	YES	YES	TLGIGAFGEVCLAR	710	-1.48459	0.928334	-1.07076	2.62487	-2.01436	3.61566	-2.65935	3.8827	3.16668	-1.07076
LATS1	Serine/threonine-protein kinase LATS1	O95835	YES	YES	CLAHSLVGTPNYIAPEVLLR	905	-1.25041	0.811386	-1.20964	3.1967	-2.09503	2.11615	-1.11738	1.33799	3.40833	-1.20964
LATS1	Serine/threonine-protein kinase LATS1	O95835	YES	YES	LSPEASDLIIK	977	-1.38144	0.677603	-1.7933	1.77523	-2.22657	1.50585	-2.80185	2.50124	2.9914	-1.7933
LATS1	Serine/threonine-protein kinase LATS1	O95835	YES	YES	LTDFGLCTGFR	844	-0.818282	0.663765	-3.12305	2.93786	-3.87789	5.77891	-3.56778	5.0487	4.53921	-3.12305
LATS1	Serine/threonine-protein kinase LATS1	O95835	YES	YES	VGLSQDAQDQMR	671	0.870123	0.635915	-0.500672	0.217383	0.788862	0.591721	-0.147401	0.0632609	0.00414511	-0.500672
LATS1	Serine/threonine-protein kinase LATS1	O95835	YES	YES	FYIAELTCAVESVHK	807	-1.01554	0.630935	-0.72217	0.815527	-1.1688	1.3476	-1.01348	1.14631	2.03024	-0.72217
LATS1	Serine/threonine-protein kinase LATS1	O95835	YES	YES	VNPPPPPQVR	234	0.541966	0.571028	-0.10729	0.0831715	0.620179	0.752115	0.646943	0.799465	0.371728	-0.10729
LATS1	Serine/threonine-protein kinase LATS1	O95835	YES	YES	DILAEADNEWVVR	755	-0.555635	0.506041	-2.76148	2.95472	-2.73929	3.21166	-4.42229	6.04882	4.56155	-2.76148
LATS1	Serine/threonine-protein kinase LATS1	O95835	YES	YES	NSLLPFANETNSSR	83	0.892541	0.464221	0.281413	0.1194	-0.471531	0.1333	0.902303	0.480966	0.0899209	0.281413
LATS1	Serine/threonine-protein kinase LATS1	O95835	YES	YES	SIEAAIEFISK	130	0.617918	0.311225	0.991861	0.567861	0.504577	0.237584	0.281141	0.119358	0.190404	0.991861
LATS1	Serine/threonine-protein kinase LATS1	O95835	YES	YES	FFMEQHVENVLK	641	0.366219	0.129946	-0.0701592	0.0317455	0.179928	0.0911233	1.50761	0.667764	0.0666694	-0.0701592
LATS1	Serine/threonine-protein kinase LATS1	O95835	YES	YES	TIDFSSDLR	1012	0.0697183	0.0400581	-1.19554	0.498785	-2.64315	1.71345	-2.31208	1.1587	2.02457	-1.19554
PAK4	Serine/threonine-protein kinase PAK 4	O96013	YES	YES	AGPPASIVPLMR	575	-0.565858	1.03516	-1.15211	5.29383	-1.20992	5.28952	-1.90643	6.81674	7.3465	-1.15211
PAK4	Serine/threonine-protein kinase PAK 4	O96013	YES	YES	LSDFGFCAQVSK	456	-0.957674	0.950859	-1.64174	3.22893	-1.71323	5.13207	-3.36828	7.00112	4.5458	-1.64174
PAK4	Serine/threonine-protein kinase PAK 4	O96013	YES	YES	IGEGSTGIVCIATVR	327	-0.599341	0.84039	-0.84828	3.97825	-1.23868	6.03718	-1.83701	5.54762	7.27716	-0.84828
PAK4	Serine/threonine-protein kinase PAK 4	O96013	YES	YES	AALQLVVDPGDPR	306	-0.706934	0.777672	-0.799621	4.02001	-1.12641	4.83361	-1.93834	7.01169	5.25394	-0.799621
PAK4	Serine/threonine-protein kinase PAK 4	O96013	YES	YES	SYLDNFIK	319	-0.742702	0.752802	-3.22598	2.21492	-3.92873	2.7189	-3.13474	2.2246	3.80829	-3.22598
PAK4	Serine/threonine-protein kinase PAK 4	O96013	YES	YES	SDSILLTHDGR	443	-0.721913	0.734988	-1.31817	4.57215	-2.15989	5.14155	-2.56426	4.97081	6.68542	-1.31817
PAK4	Serine/threonine-protein kinase PAK 4	O96013	YES	YES	LAAGRPFNTYPR	199	-0.374417	0.71927	-0.186665	0.40478	-0.133621	0.416966	-0.0788544	0.374007	0.787959	-0.186665
PAK4	Serine/threonine-protein kinase PAK 4	O96013	YES	YES	ELLFNEVVIMR	361	-0.573241	0.683574	-0.979463	3.962	-1.45208	5.20876	-1.70348	3.57326	5.39638	-0.979463
PAK4	Serine/threonine-protein kinase PAK 4	O96013	YES	YES	RELLFNEVVIMR	360	-0.483463	0.555742	-0.666751	2.78835	-1.00455	3.5475	-1.65044	4.37624	5.26852	-0.666751
PAK4	Serine/threonine-protein kinase PAK 4	O96013	YES	YES	RPKPLVDPACITSIQPGAPK	49	-0.184125	0.54248	-0.184317	0.222778	-0.293565	1.09161	-0.160151	0.516645	0.552143	-0.184317
PAK4	Serine/threonine-protein kinase PAK 4	O96013	YES	YES	RVEISAPSNFEHR	8	-0.208934	0.474855	0.195717	0.76421	0.157372	0.651952	0.130876	0.493205	0.248589	0.195717
PAK4	Serine/threonine-protein kinase PAK 4	O96013	YES	YES	QENGMPEEPATTAR	113	0.179431	0.411369	0.0662136	0.115897	0.286372	0.768869	0.428101	1.53745	1.09223	0.0662136
PAK4	Serine/threonine-protein kinase PAK 4	O96013	YES	YES	GAQGEPHDVAPNGPSAGGLAIPQSSSSSSRPPTR	219	-0.356751	0.396621	0.183311	0.21656	-0.487633	0.59541	-0.581412	0.949229	0.720673	0.183311
PAK4	Serine/threonine-protein kinase PAK 4	O96013	YES	YES	DGALTLLLDEFENMSVTR	79	-0.335698	0.341965	0.171257	0.152684	-0.217114	0.211645	-0.111562	0.0992096	0.420134	0.171257
PAK4	Serine/threonine-protein kinase PAK 4	O96013	YES	YES	ATAAELLKHPFLAK	561	-0.256945	0.251206	-1.01553	1.19938	-2.51955	3.43658	-1.74062	2.29007	1.23524	-1.01553
PAK4	Serine/threonine-protein kinase PAK 4	O96013	YES	YES	FAGHSEAGGGSGDR	138	0.134042	0.172815	0.514532	0.987707	0.658025	1.4023	0.77658	1.7802	1.6066	0.514532
PAK4	Serine/threonine-protein kinase PAK 4	O96013	YES	YES	ARQENGMPEEPATTAR	111	0.0323067	0.0412822	-0.03181	0.039421	0.00623648	0.00934157	-0.155648	0.201432	0.136698	-0.03181
PAK4	Serine/threonine-protein kinase PAK 4	O96013	YES	YES	VHTGFDQHEQK	21	0.0268012	0.0386642	-0.15675	0.269413	-0.0791856	0.147544	-0.162605	0.330992	0.282567	-0.15675
PAK4	Serine/threonine-protein kinase PAK 4	O96013	YES	YES	DKRPLSGPDVGTPQPAGLASGAK	176	0.0125724	0.0284588	-0.216685	0.351596	-0.457649	1.20076	-0.369944	1.15508	1.34825	-0.216685
PAK4	Serine/threonine-protein kinase PAK 4	O96013	YES	YES	QWQSLIEESAR	38	0.0058455	0.0174625	0.0233106	0.0675139	0.132273	0.600042	0.0628611	0.258177	0.571802	0.0233106
CHEK2	Serine/threonine-protein kinase Chk2	O96017	YES	YES	RPAVCAAVL	535	0.976486	1.07049	-0.499714	0.225614	0.647016	0.656564	0.466719	0.461625	0.796564	-0.499714
CHEK2	Serine/threonine-protein kinase Chk2	O96017	YES	YES	ILGETSLMR	374	-1.58807	0.683205	-2.48416	1.14996	-1.30005	0.762782	-2.76906	1.87131	2.97267	-2.48416
CHEK2	Serine/threonine-protein kinase Chk2	O96017	YES	YES	RRPLNNNSEIALSLSR	180	0.365016	0.681723	0.161733	0.199558	-0.24911	0.247366	-0.16085	0.221465	0.354802	0.161733
CHEK2	Serine/threonine-protein kinase Chk2	O96017	YES	YES	ALRDEYIMSK	215	0.708166	0.512797	0.570071	0.319959	-0.177582	0.0808501	0.290957	0.136211	0.119334	0.570071
CHEK2	Serine/threonine-protein kinase Chk2	O96017	YES	YES	SCEYCFDEPLLKR	120	-0.433957	0.407723	-0.553032	0.389001	-0.272738	0.356396	0.0125594	0.0134576	0.0759688	-0.553032
CHEK2	Serine/threonine-protein kinase Chk2	O96017	YES	YES	SCEYCFDEPLLK	120	0.316752	0.394346	0.0150709	0.0151086	-0.0468044	0.0468414	-0.095812	0.106148	0.084633	0.0150709
CHEK2	Serine/threonine-protein kinase Chk2	O96017	YES	YES	RPLNNNSEIALSLSR	181	-0.416187	0.370045	-0.757939	0.595029	0.586209	0.80798	-0.0228546	0.0127698	0.460537	-0.757939
CHEK2	Serine/threonine-protein kinase Chk2	O96017	YES	YES	NSYIAYIEDHSGNGTFVNTELVGK	154	0.200115	0.145624	-0.116533	0.0759148	0.223603	0.163695	-0.293323	0.241247	0.232203	-0.116533
CHEK2	Serine/threonine-protein kinase Chk2	O96017	YES	YES	TLCGTPTYLAPEVLVSVGTAGYNR	383	-0.064069	0.0520698	-0.872522	0.888256	-1.81485	1.64547	-1.57479	2.30592	1.07729	-0.872522
CHEK2	Serine/threonine-protein kinase Chk2	O96017	YES	YES	NKVFVFFDLTVDDQSVYPK	196	-0.0313613	0.0171813	-0.92798	0.964686	-0.763947	0.445968	-0.303861	0.172564	0.85306	-0.92798
ABL1	Tyrosine-protein kinase ABL1	P00519	YES	YES	TNLFSALIK	597	0.260579	1.2017	0.179577	0.526927	0.196738	1.15764	0.236819	2.27481	1.08214	0.179577
ABL1	Tyrosine-protein kinase ABL1	P00519	YES	YES	LKPAPPPPPAASAGK	895	0.215285	1.20002	0.0931421	0.344303	0.146889	0.780815	0.106261	0.420991	1.10248	0.0931421
ABL1	Tyrosine-protein kinase ABL1	P00519	YES	YES	GPPEGGLNEDER	578	0.984158	0.983743	0.965835	0.953125	-0.184949	0.095309	1.08618	1.10521	0.841285	0.965835
ABL1	Tyrosine-protein kinase ABL1	P00519	YES	YES	QFDSSTFGGHKSEKPALPR	746	-0.81445	0.834459	-0.109988	0.0847045	-0.292126	0.290553	-1.05428	1.07899	0.34251	-0.109988
ABL1	Tyrosine-protein kinase ABL1	P00519	YES	YES	DISNGALAFTPLDTADPAK	640	-1.07234	0.722202	0.529116	0.616268	-0.327324	0.202959	-0.67057	0.56857	0.666214	0.529116
ABL1	Tyrosine-protein kinase ABL1	P00519	YES	YES	VLGYNHNGEWCEAQTK	90	-1.84134	0.691449	1.16406	0.256197	1.26317	0.346556	-0.498726	0.105472	0.0813702	1.16406
ABL1	Tyrosine-protein kinase ABL1	P00519	YES	YES	QVTVAPASGLPHKEEAGK	821	-0.771858	0.681936	0.0593362	0.0693019	0.173405	0.216453	-0.22318	0.207033	0.102762	0.0593362
ABL1	Tyrosine-protein kinase ABL1	P00519	YES	YES	NKPTVYGVSPNYDKWEMER	221	-0.551466	0.674101	-0.836293	1.33709	-1.60165	2.14635	-0.757518	1.04784	1.26965	-0.836293
ABL1	Tyrosine-protein kinase ABL1	P00519	YES	YES	IASGAITK	1022	-0.403903	0.665995	-0.075395	0.108519	0.0370606	0.0760445	-0.272144	0.518755	0.186266	-0.075395
ABL1	Tyrosine-protein kinase ABL1	P00519	YES	YES	TAPTPPKR	610	0.696999	0.604308	0.992969	0.829776	1.06998	1.06372	0.936721	0.783765	0.783974	0.992969
ABL1	Tyrosine-protein kinase ABL1	P00519	YES	YES	NCLVGENHLVK	368	-0.668595	0.598724	-0.511711	1.37132	-1.35793	2.52721	-1.87669	4.12043	2.21328	-0.511711
ABL1	Tyrosine-protein kinase ABL1	P00519	YES	YES	EAINKLENNLR	1085	0.354284	0.555077	-0.341545	0.354508	-0.504372	0.701052	-0.0660604	0.076357	0.294267	-0.341545
ABL1	Tyrosine-protein kinase ABL1	P00519	YES	YES	ATSLVDAVNSDAAKPSQPGEGLK	934	-0.214998	0.427374	-0.10115	0.163664	-0.498171	1.23925	-0.354656	1.15093	0.805864	-0.10115
ABL1	Tyrosine-protein kinase ABL1	P00519	YES	YES	LGGGQYGEVYEGVWK	248	-0.827013	0.41726	0.258769	0.370617	-1.17043	1.76551	-1.83666	2.36105	3.16471	0.258769
ABL1	Tyrosine-protein kinase ABL1	P00519	YES	YES	GSALGTPAAAEPVTPTSK	839	-0.156101	0.355961	-0.131864	0.420306	-0.284149	1.06082	-0.258608	0.972144	0.639225	-0.131864
ABL1	Tyrosine-protein kinase ABL1	P00519	YES	YES	DTTDVPEMPHSK	543	0.152458	0.318774	0.229179	0.641041	0.27113	0.92194	0.231308	0.731769	0.279193	0.229179
ABL1	Tyrosine-protein kinase ABL1	P00519	YES	YES	GQGESDPLDHEPAVSPLLPR	555	-0.161154	0.280164	-0.020781	0.0245384	0.00336736	0.00856617	-0.086997	0.186358	0.22448	-0.020781
ABL1	Tyrosine-protein kinase ABL1	P00519	YES	YES	NSEQMASHSAVLEAGK	1046	0.179794	0.233322	0.119452	0.141136	-0.0124678	0.01422	-0.00528846	0.00579577	0.109829	0.119452
ABL1	Tyrosine-protein kinase ABL1	P00519	YES	YES	EIKHPNLVQLLGVCTR	292	0.38283	0.215909	-0.297181	0.164955	-0.863111	0.687777	-0.85502	0.666478	0.867827	-0.297181
ABL1	Tyrosine-protein kinase ABL1	P00519	YES	YES	SEKPALPR	757	0.141339	0.168623	0.138736	0.155781	0.00115958	0.0011384	0.269278	0.36048	0.0950403	0.138736
ABL1	Tyrosine-protein kinase ABL1	P00519	YES	YES	WTAPESLAYNK	405	0.272515	0.127214	-1.15332	0.709654	0.176526	0.0625339	-0.015047	0.00780902	0.447265	-1.15332
ABL1	Tyrosine-protein kinase ABL1	P00519	YES	YES	GVVLDSTEALCLAISR	1030	0.0597379	0.124198	0.244594	0.617346	0.144325	0.38125	0.0502037	0.0904667	0.39938	0.244594
ABL1	Tyrosine-protein kinase ABL1	P00519	YES	YES	NLYTFCVSYVDSIQQMR	1062	-0.141827	0.0744212	-0.449988	0.37362	0.00428142	0.00225664	-0.640194	0.556511	0.674123	-0.449988
ABL1	Tyrosine-protein kinase ABL1	P00519	YES	YES	AGGKPSQSPSQEAAGEAVLGAK	910	-0.0410504	0.0736856	-0.275353	0.546554	-0.460841	1.27756	-0.179786	0.572908	0.683384	-0.275353
ABL1	Tyrosine-protein kinase ABL1	P00519	YES	YES	GAVSTLLQAPELPTK	517	0.0130998	0.0597474	-0.0343872	0.180367	-0.0404823	0.178504	0.0429905	0.267141	0.0824577	-0.0343872
ABL1	Tyrosine-protein kinase ABL1	P00519	YES	YES	AGSGAPGGTSKGPAEESR	857	0.0145751	0.0141412	-0.673343	0.446012	0.341743	0.661475	0.218641	0.327506	0.979383	-0.673343
ABL1	Tyrosine-protein kinase ABL1	P00519	YES	YES	EISDIVQR	1123	0.00268597	0.00993671	0.052642	0.218899	0.0656073	0.352901	0.0648494	0.421491	0.0984747	0.052642
PGK1	Phosphoglycerate kinase 1	P00558	NO	YES	SLSNKLTLDKLDVK	2	-0.187461	0.760544	-0.25783	0.494238	-0.435119	1.75355	-0.102304	0.430426	0.384706	-0.25783
PGK1	Phosphoglycerate kinase 1	P00558	NO	YES	DCVGPEVEK	98	0.167077	0.701286	0.11181	0.443382	0.0409355	0.140922	0.323577	1.43766	0.552175	0.11181
PGK1	Phosphoglycerate kinase 1	P00558	NO	YES	FHVEEEGKGK	124	0.240806	0.671914	0.142505	0.371899	-0.0852454	0.193017	0.105156	0.244662	0.485419	0.142505
PGK1	Phosphoglycerate kinase 1	P00558	NO	YES	NNQITNNQR	31	-0.493599	0.658008	-0.927727	0.848254	-0.252874	0.381239	-0.142534	0.192111	0.43385	-0.927727
PGK1	Phosphoglycerate kinase 1	P00558	NO	YES	ITLPVDFVTADKFDENAK	280	-0.15169	0.615805	-0.158657	0.410125	-0.36901	1.45038	-0.0957085	0.50706	1.3956	-0.158657
PGK1	Phosphoglycerate kinase 1	P00558	NO	YES	VLNNMEIGTSLFDEEGAK	247	0.301304	0.614771	0.0953128	0.132806	-0.529272	0.35426	-0.221698	0.21568	0.879706	0.0953128
PGK1	Phosphoglycerate kinase 1	P00558	NO	YES	VVMRVDFNVPMKNNQITNNQR	19	-0.704047	0.610595	-0.241023	0.3849	-0.355084	0.545019	-0.31925	0.386002	0.352887	-0.241023
PGK1	Phosphoglycerate kinase 1	P00558	NO	YES	AAVPSIKFCLDNGAK	42	0.758814	0.605711	0.507829	0.45892	-0.286311	0.17356	-0.707121	0.432971	0.687935	0.507829
PGK1	Phosphoglycerate kinase 1	P00558	NO	YES	DVLFLKDCVGPEVEK	92	-0.390503	0.584637	-0.36337	0.288365	-0.879066	0.890456	-0.312648	0.384285	0.428798	-0.36337
PGK1	Phosphoglycerate kinase 1	P00558	NO	YES	SVVLMSHLGRPDGVPMPDKYSLEPVAVELK	57	-0.404569	0.578359	-0.512063	0.397307	-0.92273	1.37917	-0.873752	1.29163	1.05056	-0.512063
PGK1	Phosphoglycerate kinase 1	P00558	NO	YES	SLLGKDVLFLKDCVGPEVEK	87	-0.561883	0.570683	0.205184	0.342172	-0.303717	0.248519	-0.0361456	0.0427321	0.100916	0.205184
PGK1	Phosphoglycerate kinase 1	P00558	NO	YES	VLPGVDALSNI	407	0.175716	0.499194	0.0389228	0.10489	0.0426317	0.0892564	0.23876	0.93552	0.152901	0.0389228
PGK1	Phosphoglycerate kinase 1	P00558	NO	YES	FCLDNGAKSVVLMSHLGRPDGVPMPDK	49	-1.74581	0.493698	-0.34367	0.0979985	-0.430598	0.117752	-0.40381	0.0956112	0.0774053	-0.34367
PGK1	Phosphoglycerate kinase 1	P00558	NO	YES	IKAAVPSIK	40	-1.0299	0.449611	-0.599309	0.728514	-0.315182	0.454854	-0.759649	0.988559	1.88717	-0.599309
PGK1	Phosphoglycerate kinase 1	P00558	NO	YES	QIVWNGPVGVFEWEAFAR	333	0.227088	0.441086	-0.0570934	0.075602	0.145179	0.200474	0.0536214	0.0685636	0.100956	-0.0570934
PGK1	Phosphoglycerate kinase 1	P00558	NO	YES	ELNYFAK	193	-0.183203	0.436	-0.167052	0.532929	-0.240563	0.564049	0.0753664	0.228671	0.244777	-0.167052
PGK1	Phosphoglycerate kinase 1	P00558	NO	YES	VDFNVPMKNNQITNNQR	23	-0.211243	0.418127	-0.252934	0.979399	-0.175035	0.643378	-0.0761848	0.303859	0.20129	-0.252934
PGK1	Phosphoglycerate kinase 1	P00558	NO	YES	LGDVYVNDAFGTAHR	157	0.0912544	0.289294	-0.0346319	0.105665	-0.100903	0.516747	0.0754763	0.392513	0.101355	-0.0346319
PGK1	Phosphoglycerate kinase 1	P00558	NO	YES	AEPAKIEAFR	142	0.111941	0.23585	0.114919	0.227996	-0.0296405	0.0814365	0.106702	0.394814	0.0896153	0.114919
PGK1	Phosphoglycerate kinase 1	P00558	NO	YES	AGGFLMKK	185	0.134477	0.193747	0.0180846	0.0252509	-0.185377	0.294671	-0.0908481	0.163095	0.204381	0.0180846
PGK1	Phosphoglycerate kinase 1	P00558	NO	YES	ACANPAAGSVILLENLR	107	-0.0575106	0.175798	-0.202278	0.800718	-0.180864	0.457948	0.0936242	0.350694	0.04822	-0.202278
PGK1	Phosphoglycerate kinase 1	P00558	NO	YES	LTLDKLDVK	7	0.178297	0.174914	-0.00768462	0.00824005	-0.12152	0.185492	0.254853	0.40941	0.0772505	-0.00768462
PGK1	Phosphoglycerate kinase 1	P00558	NO	YES	VKAEPAKIEAFR	140	0.0661485	0.170204	-0.172834	0.335961	-0.262559	0.671692	-0.0706487	0.188057	0.605058	-0.172834
PGK1	Phosphoglycerate kinase 1	P00558	NO	YES	AAVPSIK	42	-0.10521	0.150917	-0.0849028	0.108383	-0.214591	0.915826	-0.0974201	0.273144	0.704618	-0.0849028
PGK1	Phosphoglycerate kinase 1	P00558	NO	YES	TGQATVASGIPAGWMGLDCGPESSKK	298	0.214637	0.145298	-0.29724	0.249494	-0.466147	0.345782	-0.0272198	0.0184488	0.0338187	-0.29724
PGK1	Phosphoglycerate kinase 1	P00558	NO	YES	WNTEDKVSHVSTGGGASLELLEGK	383	0.253901	0.129937	0.223102	0.1171	-0.281802	0.152931	-0.330551	0.189988	0.135045	0.223102
PGK1	Phosphoglycerate kinase 1	P00558	NO	YES	SLLGKDVLFLK	87	-0.0582269	0.117898	-0.0728923	0.145989	-0.199356	0.681788	0.0308325	0.0905519	0.0204233	-0.0728923
PGK1	Phosphoglycerate kinase 1	P00558	NO	YES	GCITIIGGGDTATCCAK	366	-0.0410646	0.108567	-0.203914	0.574916	-0.2426	0.632548	-0.0443933	0.0875448	0.354578	-0.203914
PGK1	Phosphoglycerate kinase 1	P00558	NO	YES	ALESPERPFLAILGGAK	200	-0.0468121	0.0936935	-0.178625	0.714973	-0.336422	1.24539	-0.0693562	0.194941	0.475284	-0.178625
PGK1	Phosphoglycerate kinase 1	P00558	NO	YES	FCLDNGAK	49	0.0258377	0.0929785	-0.13859	0.595545	-0.162482	0.633253	0.0886715	0.283276	0.0713508	-0.13859
PGK1	Phosphoglycerate kinase 1	P00558	NO	YES	AKQIVWNGPVGVFEWEAFAR	331	-0.235166	0.0712235	0.470447	0.183953	0.298057	0.137008	0.729098	0.354429	0.178804	0.470447
PGK1	Phosphoglycerate kinase 1	P00558	NO	YES	VDFNVPMK	23	0.0293511	0.0569369	-0.337977	0.984513	-0.160953	0.629668	0.15289	0.552429	0.12363	-0.337977
PGK1	Phosphoglycerate kinase 1	P00558	NO	YES	ALMDEVVK	354	-0.0088744	0.0210229	-0.205494	0.786786	-0.185207	0.509656	0.144982	0.697639	0.478072	-0.205494
PGK1	Phosphoglycerate kinase 1	P00558	NO	YES	AHSSMVGVNLPQK	172	0.00619926	0.0162458	-0.177027	0.739854	-0.189627	0.960623	-0.0939056	0.317886	0.266575	-0.177027
AK1	Adenylate kinase isoenzyme 1	P00568	NO	YES	GQLVPLETVLDMLR	64	-2.05261	2.95657	0.156156	0.507	0.366823	1.53	-0.299179	0.212392	1.77086	0.156156
AK1	Adenylate kinase isoenzyme 1	P00568	NO	YES	SEVSSGSAR	45	-0.594959	1.74916	-0.318299	0.674193	-0.134722	0.282958	-0.0582282	0.131557	0.941324	-0.318299
AK1	Adenylate kinase isoenzyme 1	P00568	NO	YES	EVQQGEEFERR	98	0.286857	1.13057	-0.00201697	0.00531794	-0.00738767	0.0259097	-0.03922	0.14685	0.132122	-0.00201697
AK1	Adenylate kinase isoenzyme 1	P00568	NO	YES	VDDNEETIK	139	-0.284428	1.08139	-0.135983	0.346217	0.261876	0.950327	0.208244	0.784142	0.390008	-0.135983
AK1	Adenylate kinase isoenzyme 1	P00568	NO	YES	VNAEGSVDSVFSQVCTHLDALK	173	-0.11213	0.716659	0.0352158	0.126198	-0.0391487	0.1609	-0.226744	1.42928	1.65397	0.0352158
AK1	Adenylate kinase isoenzyme 1	P00568	NO	YES	ATEPVIAFYEKR	156	0.243679	0.631876	0.324929	0.926063	0.0928807	0.133835	0.291639	0.817652	0.769439	0.324929
AK1	Adenylate kinase isoenzyme 1	P00568	NO	YES	GETSGRVDDNEETIK	133	-0.337145	0.628777	-0.0784903	0.11772	-0.0372163	0.0771443	-0.098902	0.233161	0.0983308	-0.0784903
AK1	Adenylate kinase isoenzyme 1	P00568	NO	YES	LSEIMEKGQLVPLETVLDMLR	57	-1.91667	0.573285	0.0121155	0.0197587	-0.0274126	0.064722	0.0214117	0.0335319	0.18569	0.0121155
AK1	Adenylate kinase isoenzyme 1	P00568	NO	YES	YGYTHLSTGDLLR	32	0.0629771	0.519793	0.0629336	0.4064	0.069337	0.68565	0.0234165	0.189409	0.0192827	0.0629336
AK1	Adenylate kinase isoenzyme 1	P00568	NO	YES	LSEIMEK	57	0.0862349	0.467075	0.0705374	0.306349	0.143645	1.06745	0.115636	0.884857	0.831507	0.0705374
AK1	Adenylate kinase isoenzyme 1	P00568	NO	YES	GFLIDGYPREVQQGEEFER	89	0.159996	0.410406	0.238105	0.634567	0.303013	1.0967	0.0691218	0.121168	0.0927402	0.238105
AK1	Adenylate kinase isoenzyme 1	P00568	NO	YES	GFLIDGYPREVQQGEEFERR	89	0.0962978	0.266857	0.237486	0.788347	0.166063	0.352647	-0.0587681	0.16077	0.0706018	0.237486
AK1	Adenylate kinase isoenzyme 1	P00568	NO	YES	GFLIDGYPR	89	0.0372412	0.250503	0.026735	0.126416	0.0140448	0.111573	0.0454398	0.331336	0.253769	0.026735
AK1	Adenylate kinase isoenzyme 1	P00568	NO	YES	IIFVVGGPGSGK	10	0.0563274	0.220475	0.0798319	0.355736	0.0609028	0.283523	0.10071	0.482937	0.16154	0.0798319
AK1	Adenylate kinase isoenzyme 1	P00568	NO	YES	RGETSGRVDDNEETIK	132	-0.0975522	0.218232	-0.147047	0.396735	-0.102656	0.392274	-0.180836	0.684115	0.687797	-0.147047
AK1	Adenylate kinase isoenzyme 1	P00568	NO	YES	RIGQPTLLLYVDAGPETMTQR	108	0.0825387	0.205572	0.0711011	0.179654	-0.0932414	0.200835	-0.494445	0.689238	0.429218	0.0711011
AK1	Adenylate kinase isoenzyme 1	P00568	NO	YES	TKIIFVVGGPGSGK	8	0.153521	0.170418	0.47213	0.828068	0.789006	1.60337	-0.170525	0.110004	0.0782275	0.47213
AK1	Adenylate kinase isoenzyme 1	P00568	NO	YES	ATEPVIAFYEK	156	-0.0473162	0.170344	0.0441732	0.183103	0.0822617	0.372161	0.0966639	0.419822	0.0448495	0.0441732
AK1	Adenylate kinase isoenzyme 1	P00568	NO	YES	EVQQGEEFER	98	-0.0283693	0.162641	-0.0334861	0.122206	0.0103236	0.0524803	0.0370755	0.229399	0.186594	-0.0334861
AK1	Adenylate kinase isoenzyme 1	P00568	NO	YES	KLSEIMEK	56	0.0482117	0.162132	-0.0550011	0.161798	-0.0167533	0.0745313	0.0126499	0.0440497	0.292807	-0.0550011
AK1	Adenylate kinase isoenzyme 1	P00568	NO	YES	RLETYYK	149	-0.0259775	0.152504	-0.0166035	0.0505038	0.0136968	0.0756896	0.136641	0.80654	0.100407	-0.0166035
AK1	Adenylate kinase isoenzyme 1	P00568	NO	YES	IGQPTLLLYVDAGPETMTQR	109	-0.0294068	0.141576	0.0747885	0.360271	-0.0631095	0.302212	-0.0906832	0.578323	0.477498	0.0747885
AK1	Adenylate kinase isoenzyme 1	P00568	NO	YES	KVNAEGSVDSVFSQVCTHLDALK	172	0.108807	0.136401	-0.169116	0.230106	-0.171113	0.196984	-0.1943	0.283864	0.260113	-0.169116
AK1	Adenylate kinase isoenzyme 1	P00568	NO	YES	VDDNEETIKK	139	-0.0798169	0.134244	-0.0614343	0.138435	-0.0104708	0.0201888	0.0324878	0.0653985	0.232044	-0.0614343
AK1	Adenylate kinase isoenzyme 1	P00568	NO	YES	IIFVVGGPGSGKGTQCEK	10	0.0137921	0.0527818	0.0690985	0.35599	0.120762	0.477824	-0.00243591	0.0082871	0.353056	0.0690985
AK1	Adenylate kinase isoenzyme 1	P00568	NO	YES	GETSGRVDDNEETIKK	133	0.0693505	0.0270921	0.312657	0.149165	-0.151527	0.0585747	0.271433	0.111606	0.0317967	0.312657
RAF1	RAF proto-oncogene serine/threonine-protein kinase	P04049	YES	YES	IGSGSFGTVYK	355	0.286208	1.2827	0.325026	1.3364	0.193484	0.499612	-0.388656	0.255788	0.834386	0.325026
RAF1	RAF proto-oncogene serine/threonine-protein kinase	P04049	YES	YES	WSGSQQVEQPTGSVLWMAPEVIR	496	1.79667	1.19906	-0.421572	0.296074	0.249155	0.143056	0.337908	0.298737	0.468569	-0.421572
RAF1	RAF proto-oncogene serine/threonine-protein kinase	P04049	YES	YES	TISNGFGFKDAVFDGSSCISPTIVQQFGYQR	10	-0.830103	0.976382	-1.01067	0.66017	-1.06119	0.922309	-0.494302	0.241555	1.13872	-1.01067
RAF1	RAF proto-oncogene serine/threonine-protein kinase	P04049	YES	YES	MEHIQGAWK	1	-0.822292	0.678471	-0.390679	0.480872	0.395683	0.851723	-0.0424179	0.0492884	1.02245	-0.390679
RAF1	RAF proto-oncogene serine/threonine-protein kinase	P04049	YES	YES	HVNILLFMGYMTK	402	1.00134	0.529595	1.06174	0.866904	0.986375	0.797698	0.743261	0.573119	0.533524	1.06174
RAF1	RAF proto-oncogene serine/threonine-protein kinase	P04049	YES	YES	AAHTEDINACTLTTSPR	628	-0.176182	0.512668	-0.217003	0.491811	-0.223573	0.575306	-0.270225	0.76963	0.593162	-0.217003
RAF1	RAF proto-oncogene serine/threonine-protein kinase	P04049	YES	YES	EERPLFPQILSSIELLQHSLPK	594	-0.552808	0.510425	-0.923008	0.591807	-0.214836	0.199922	-0.68632	0.953269	0.807361	-0.923008
RAF1	RAF proto-oncogene serine/threonine-protein kinase	P04049	YES	YES	HLHVQETK	432	-0.441839	0.502238	-0.26497	0.330421	-0.459456	0.511268	-0.477731	0.782159	0.502249	-0.26497
RAF1	RAF proto-oncogene serine/threonine-protein kinase	P04049	YES	YES	GLQPECCAVFR	90	-0.121541	0.46608	-0.0617184	0.234478	0.114587	0.600805	-0.00963532	0.0369062	0.0886636	-0.0617184
RAF1	RAF proto-oncogene serine/threonine-protein kinase	P04049	YES	YES	GKWHGDVAVK	366	-0.649438	0.374087	-0.605613	0.762883	-1.43415	1.31276	-2.22459	1.02194	0.0445043	-0.605613
RAF1	RAF proto-oncogene serine/threonine-protein kinase	P04049	YES	YES	QTAQGMDYLHAK	451	0.227551	0.372692	0.210397	0.371158	0.274034	0.532759	0.294551	0.608397	0.312001	0.210397
RAF1	RAF proto-oncogene serine/threonine-protein kinase	P04049	YES	YES	MIEDAIR	276	0.109577	0.237336	0.221436	0.579401	-0.00549368	0.00885767	0.0224824	0.0424864	0.375188	0.221436
RAF1	RAF proto-oncogene serine/threonine-protein kinase	P04049	YES	YES	DQIIFMVGR	555	-0.274414	0.229937	0.160948	0.594991	-0.0641612	0.0617612	-1.01987	0.469578	0.496572	0.160948
RAF1	RAF proto-oncogene serine/threonine-protein kinase	P04049	YES	YES	VVDPTPEQFQAFR	379	0.0548067	0.222704	0.0637322	0.220111	0.105848	0.588005	-0.0884716	0.440069	0.199006	0.0637322
RAF1	RAF proto-oncogene serine/threonine-protein kinase	P04049	YES	YES	YSTPHAFTFNTSSPSSEGSLSQR	232	0.0896017	0.212496	0.0685275	0.162702	-0.113889	0.271075	-0.00983602	0.0199184	0.202937	0.0685275
RAF1	RAF proto-oncogene serine/threonine-protein kinase	P04049	YES	YES	IGDFGLATVK	484	-0.0462121	0.183221	0.0129992	0.0539349	0.0371861	0.147101	0.0297563	0.115885	0.113991	0.0129992
RAF1	RAF proto-oncogene serine/threonine-protein kinase	P04049	YES	YES	SNNIFLHEGLTVK	471	0.044541	0.150156	-0.00146001	0.0031203	0.00619688	0.0183918	-0.0272653	0.0958568	0.736396	-0.00146001
RAF1	RAF proto-oncogene serine/threonine-protein kinase	P04049	YES	YES	QLLLFPNSTIGDSGVPALPSLTMR	192	0.0738357	0.133386	-0.150437	0.349507	0.187051	0.537814	-0.0551762	0.094115	0.127379	-0.150437
RAF1	RAF proto-oncogene serine/threonine-protein kinase	P04049	YES	YES	FQMFQLIDIAR	440	0.0472162	0.126395	-0.0399844	0.0775589	0.0524953	0.149254	0.0369845	0.112885	0.165054	-0.0399844
RAF1	RAF proto-oncogene serine/threonine-protein kinase	P04049	YES	YES	DAVFDGSSCISPTIVQQFGYQR	19	-0.19913	0.0928828	-0.221267	0.0836512	0.188444	0.0727405	0.322188	0.15935	0.126205	-0.221267
TK1	Thymidine kinase, cytosolic	P04183	NO	YES	GQIQVILGPMFSGK	19	0.569939	1.90216	0.505183	1.17117	0.606341	2.1418	0.428759	1.22897	0.214891	0.505183
TK1	Thymidine kinase, cytosolic	P04183	NO	YES	NTMEALPACLLR	71	-0.37522	0.58824	-0.210292	0.368106	-0.401371	0.832629	-0.0280352	0.0401961	0.437645	-0.210292
TK1	Thymidine kinase, cytosolic	P04183	NO	YES	LGTEKEVEVIGGADK	166	-1.82738	0.425079	-0.169699	0.0400322	-0.53716	0.174746	-2.14949	1.17535	0.529587	-0.169699
TK1	Thymidine kinase, cytosolic	P04183	NO	YES	LTAVCMECFR	149	0.178373	0.388916	-0.10275	0.103885	0.288383	0.770974	0.0918727	0.168159	0.284985	-0.10275
TK1	Thymidine kinase, cytosolic	P04183	NO	YES	KPFGAILNLVPLAESVVK	131	0.0677334	0.219151	-0.0155771	0.0470496	-0.0675774	0.281584	-0.115781	0.523143	0.313708	-0.0155771
TK1	Thymidine kinase, cytosolic	P04183	NO	YES	KLFAPQQILQCSPAN	220	0.0296512	0.168607	0.0708864	0.323988	0.0671272	0.454759	0.0486951	0.390405	0.435248	0.0708864
TK1	Thymidine kinase, cytosolic	P04183	NO	YES	EVEVIGGADKYHSVCR	171	0.166894	0.165925	0.270925	0.351653	0.139996	0.140312	0.317588	0.306101	0.0212102	0.270925
TK1	Thymidine kinase, cytosolic	P04183	NO	YES	LFAPQQILQCSPAN	221	0.0327177	0.108317	0.102091	0.403536	0.177776	0.858089	0.15998	0.678696	0.305491	0.102091
TK1	Thymidine kinase, cytosolic	P04183	NO	YES	YSSSFCTHDR	61	-0.0444968	0.0662721	0.0031707	0.00467372	0.202694	0.366806	0.0254897	0.0407168	0.0632171	0.0031707
TK1	Thymidine kinase, cytosolic	P04183	NO	YES	ENCPVPGKPGEAVAAR	204	0.0264141	0.0273498	0.0969809	0.162949	-0.329528	0.337756	0.0794797	0.141229	0.24654	0.0969809
TK1	Thymidine kinase, cytosolic	P04183	NO	YES	TVIVAALDGTFQR	118	-0.000685961	0.0016474	0.0409008	0.0989001	-0.00452002	0.0104491	-0.0821543	0.172518	0.170944	0.0409008
ERBB2	Receptor tyrosine-protein kinase erbB-2	P04626	YES	YES	ANKEILDEAYVMAGVGSPYVSR	763	-0.0745318	0.0935582	0.272384	0.369688	-0.137294	0.184687	-0.204033	0.288912	0.335703	0.272384
PRKCB	Protein kinase C beta type	P05771	YES	YES	IADFGMCK	482	-1.63629	2.20907	-2.94799	3.88125	-3.18696	2.88777	-2.96045	4.56815	4.10597	-2.94799
PRKCB	Protein kinase C beta type	P05771	YES	YES	EAVAICK	567	-1.12928	1.54585	-1.78244	4.57964	-2.74872	7.32248	-3.1594	8.02603	7.60669	-1.78244
PRKCB	Protein kinase C beta type	P05771	YES	YES	FFKQPTFCSHCTDFIWGFGK	43	-1.8898	1.37522	-1.68721	1.23117	-0.992003	0.736755	-0.992899	0.635151	0.465846	-1.68721
PRKCB	Protein kinase C beta type	P05771	YES	YES	ENIWDGVTTK	490	-1.31468	1.14899	-2.42514	7.77947	-3.3762	9.32321	-3.93715	7.93763	7.10803	-2.42514
PRKCB	Protein kinase C beta type	P05771	YES	YES	IADFGMCKENIWDGVTTK	482	-0.964505	1.1306	-1.90189	6.01461	-2.56549	6.63329	-2.82112	6.46175	6.03348	-1.90189
PRKCB	Protein kinase C beta type	P05771	YES	YES	TFCGTPDYIAPEIIAYQPYGK	500	-0.669671	1.04888	-1.37987	5.06359	-2.18507	8.01008	-2.70323	8.55997	6.67221	-1.37987
PRKCB	Protein kinase C beta type	P05771	YES	YES	LGCGPEGER	584	-1.18046	1.03213	-1.9262	5.54738	-2.54872	6.01871	-3.04535	6.10263	6.84322	-1.9262
PRKCB	Protein kinase C beta type	P05771	YES	YES	LDNVMLDSEGHIK	469	-1.28429	1.00784	-2.39381	8.54653	-3.78443	5.47601	-4.78205	6.87117	6.44955	-2.39381
PRKCB	Protein kinase C beta type	P05771	YES	YES	GTDELYAVK	363	-1.09936	0.992155	-1.80196	6.96584	-2.83882	9.11527	-3.35045	7.78227	8.85582	-1.80196
PRKCB	Protein kinase C beta type	P05771	YES	YES	YIDWEKLER	602	-1.08421	0.962951	-1.90595	7.44559	-2.87105	9.84358	-3.37169	7.74548	8.05829	-1.90595
PRKCB	Protein kinase C beta type	P05771	YES	YES	TTNTVSKFDNNGNR	321	-0.770815	0.922321	-0.796636	1.62754	-0.78486	1.84818	-0.827247	1.77209	2.45762	-0.796636
PRKCB	Protein kinase C beta type	P05771	YES	YES	VLALPGKPPFLTQLHSCFQTMDR	393	-1.78427	0.866427	-2.97634	7.10043	-5.40207	6.58723	-5.39193	6.21934	7.31749	-2.97634
PRKCB	Protein kinase C beta type	P05771	YES	YES	VMLSERK	356	-1.46526	0.8451	-1.46913	2.41424	-3.32628	4.24839	-4.14907	2.90383	5.26622	-1.46913
PRKCB	Protein kinase C beta type	P05771	YES	YES	DVVIQDDDVECTMVEKR	376	-1.03001	0.844952	-1.31671	4.71783	-2.4493	7.67208	-3.27169	6.68663	6.55535	-1.31671
PRKCB	Protein kinase C beta type	P05771	YES	YES	KEIQPPYKPK	611	-0.648928	0.804201	-2.07653	1.65852	-1.46451	2.30627	-1.48879	2.40393	1.14905	-2.07653
PRKCB	Protein kinase C beta type	P05771	YES	YES	LTDFNFLMVLGK	339	-0.908121	0.777209	-1.39559	5.77894	-2.37356	9.13093	-2.95833	8.77227	8.13254	-1.39559
PRKCB	Protein kinase C beta type	P05771	YES	YES	DLKLDNVMLDSEGHIK	466	-0.923966	0.772336	-1.43709	6.19863	-2.52426	8.43637	-3.27283	8.68453	8.46134	-1.43709
PRKCB	Protein kinase C beta type	P05771	YES	YES	DVVIQDDDVECTMVEK	376	-1.07259	0.755607	-2.70331	3.84592	-4.43198	5.90304	-4.93404	6.13839	5.73032	-2.70331
PRKCB	Protein kinase C beta type	P05771	YES	YES	NLVPMDPNGLSDPYVK	182	-0.979516	0.737231	-1.33329	2.66947	-1.22139	2.55448	-0.711148	1.43108	1.58671	-1.33329
PRKCB	Protein kinase C beta type	P05771	YES	YES	KDVVIQDDDVECTMVEKR	375	-0.853366	0.736826	-1.3011	1.8812	-2.7691	4.41218	-0.543075	0.157776	3.70189	-1.3011
PRKCB	Protein kinase C beta type	P05771	YES	YES	DIKEHAFFR	593	-0.535832	0.731035	-1.14202	2.54376	-2.3016	7.31247	-2.89748	8.20881	7.73888	-1.14202
PRKCB	Protein kinase C beta type	P05771	YES	YES	EIQPPYKPK	612	-1.47827	0.709804	-2.17493	1.37074	-5.78987	2.06824	-6.26728	2.11887	1.22822	-2.17493
PRKCB	Protein kinase C beta type	P05771	YES	YES	DTSNFDKEFTR	626	0.331043	0.68626	0.0870268	0.153323	0.410992	1.18753	0.149879	0.284517	1.3843	0.0870268
PRKCB	Protein kinase C beta type	P05771	YES	YES	GLMTKHPGKR	574	0.541956	0.653152	0.362462	0.5706	-0.932936	1.96485	-1.47808	2.77495	2.96406	0.362462
PRKCB	Protein kinase C beta type	P05771	YES	YES	KGTDELYAVK	362	-1.39373	0.629411	-2.52869	3.86805	-5.77814	4.86188	-6.25874	6.66957	5.33761	-2.52869
PRKCB	Protein kinase C beta type	P05771	YES	YES	LYFVMEYVNGGDLMYHIQQVGR	416	-0.979692	0.61388	-3.05525	3.62201	-3.17527	4.89732	-2.53278	3.9565	5.09623	-3.05525
PRKCB	Protein kinase C beta type	P05771	YES	YES	RLGCGPEGER	583	0.789877	0.506882	0.193983	0.0637159	1.08666	0.749183	0.0547401	0.0180969	0.530217	0.193983
PRKCB	Protein kinase C beta type	P05771	YES	YES	ASVDGWFK	269	-0.6483	0.277703	-0.975233	0.77583	-0.930377	0.900642	-1.18858	0.625156	0.125719	-0.975233
PRKCB	Protein kinase C beta type	P05771	YES	YES	LTDFNFLMVLGKGSFGK	339	-0.726104	0.274075	-1.55626	0.880147	-0.91837	0.466997	-0.246513	0.088993	1.40881	-1.55626
PRKCB	Protein kinase C beta type	P05771	YES	YES	LSVEIWDWDLTSR	240	-0.568215	0.257294	0.870754	0.411576	-0.425726	0.182223	-0.313997	0.147613	0.200803	0.870754
PRKCB	Protein kinase C beta type	P05771	YES	YES	ISQGTKVPEEK	310	0.0839694	0.239757	0.010195	0.0258768	0.0716872	0.219609	-0.0556553	0.178083	0.0573308	0.010195
PRKCB	Protein kinase C beta type	P05771	YES	YES	ADPAAGPPPSEGEESTVR	2	0.0948613	0.221076	-0.0514432	0.119055	-0.137047	0.348547	-0.0948985	0.23135	0.161966	-0.0514432
PRKCB	Protein kinase C beta type	P05771	YES	YES	FDNNGNR	328	-0.216018	0.176531	-0.360707	0.246844	-0.931984	0.967232	-0.0521806	0.0380312	0.79555	-0.360707
PRKCB	Protein kinase C beta type	P05771	YES	YES	CSLNPEWNETFR	217	-0.13166	0.144348	-0.593136	1.16789	-0.634907	1.33919	-0.760671	0.635395	0.921254	-0.593136
PRKCB	Protein kinase C beta type	P05771	YES	YES	AKISQGTKVPEEK	308	0.0701914	0.129111	-0.0950954	0.212328	-0.249548	0.874808	-0.489292	1.64182	0.595171	-0.0950954
PRKCB	Protein kinase C beta type	P05771	YES	YES	MKLTDFNFLMVLGK	337	0.151732	0.0983403	-0.440731	0.706994	-0.862036	1.67375	-1.00735	1.67307	2.11764	-0.440731
PRKCB	Protein kinase C beta type	P05771	YES	YES	QGFQCQVCCFVVHKR	63	0.084548	0.0714347	-0.46184	0.29545	0.246378	0.270352	-0.289919	0.348539	0.22044	-0.46184
PRKCB	Protein kinase C beta type	P05771	YES	YES	YIDWEKLERK	602	-0.0455791	0.0410756	-0.636464	1.48724	-1.79252	4.46493	-2.86193	4.96005	3.48166	-0.636464
LCK	Tyrosine-protein kinase Lck	P06239	YES	YES	LIEDNEYTAR	388	-0.197455	0.461929	-1.53265	1.00458	0.0938453	0.176987	0.0783026	0.181226	0.0670287	-1.53265
LCK	Tyrosine-protein kinase Lck	P06239	YES	YES	WTAPEAINYGTFTIKSDVWSFGILLTEIVTHGR	406	-0.113066	0.105425	0.629042	0.873815	0.186931	0.183162	0.545794	0.456797	0.054395	0.629042
CDK1	Cyclin-dependent kinase 1	P06493	YES	YES	ALGTPNNEVWPEVESLQDYK	219	-0.218217	1.71933	-0.118049	0.764338	-0.516419	0.954598	-0.842929	1.17814	1.11762	-0.118049
CDK1	Cyclin-dependent kinase 1	P06493	YES	YES	KIRLESEEEGVPSTAIR	34	-0.408285	1.70004	-0.035799	0.0816969	-0.175148	0.491785	-0.144525	0.458803	0.291405	-0.035799
CDK1	Cyclin-dependent kinase 1	P06493	YES	YES	IRLESEEEGVPSTAIR	35	-0.149403	1.1331	-0.14932	0.646095	-0.245889	1.77881	-0.259507	2.05887	2.41135	-0.14932
CDK1	Cyclin-dependent kinase 1	P06493	YES	YES	HKTTGQVVAMKK	23	1.30444	0.976053	0.673106	0.58751	0.590066	0.505324	0.519497	0.426336	0.522058	0.673106
CDK1	Cyclin-dependent kinase 1	P06493	YES	YES	NLDENGLDLLSK	255	-0.0783119	0.972879	-0.0768301	0.599424	-0.118137	1.79075	-0.113201	1.38935	2.33611	-0.0768301
CDK1	Cyclin-dependent kinase 1	P06493	YES	YES	YLDSIPPGQYMDSSLVK	90	0.541818	0.777798	-0.0332962	0.0318815	-0.31314	0.176097	-0.017664	0.0116661	0.0208632	-0.0332962
CDK1	Cyclin-dependent kinase 1	P06493	YES	YES	SYLYQILQGIVFCHSR	107	-0.903299	0.775275	-0.963929	0.868604	-1.18887	1.11311	-0.593401	0.313885	1.05475	-0.963929
CDK1	Cyclin-dependent kinase 1	P06493	YES	YES	ALGTPNNEVWPEVESLQDYKNTFPK	219	-0.256342	0.743618	-0.775954	0.657624	-0.405018	1.25701	-0.555573	1.99476	1.08676	-0.775954
CDK1	Cyclin-dependent kinase 1	P06493	YES	YES	MLIYDPAKR	267	0.18343	0.727155	0.00858861	0.0203664	-0.12341	0.68791	-0.112969	0.629524	1.01082	0.00858861
CDK1	Cyclin-dependent kinase 1	P06493	YES	YES	SPEVLLGSAR	171	-0.140728	0.684387	-0.0939664	0.396518	-0.106776	0.41737	-0.109161	0.502472	0.846105	-0.0939664
CDK1	Cyclin-dependent kinase 1	P06493	YES	YES	KPLFHGDSEIDQLFR	201	-0.0750624	0.659697	-0.0522332	0.298895	-0.172445	1.74559	-0.23463	2.85375	3.11878	-0.0522332
CDK1	Cyclin-dependent kinase 1	P06493	YES	YES	LESEEEGVPSTAIR	37	-0.0851248	0.653727	-0.178421	1.62733	-0.350144	3.20545	-0.297621	2.46802	2.39307	-0.178421
CDK1	Cyclin-dependent kinase 1	P06493	YES	YES	TTGQVVAMKK	25	0.180509	0.588872	-0.107178	0.263649	-0.305966	1.09308	-0.191279	0.655455	0.665647	-0.107178
CDK1	Cyclin-dependent kinase 1	P06493	YES	YES	DLKPQNLLIDDKGTIK	128	-0.0855646	0.57738	-0.101092	0.427734	-0.27299	1.80784	-0.301164	2.88047	3.20058	-0.101092
CDK1	Cyclin-dependent kinase 1	P06493	YES	YES	MLIYDPAK	267	-0.082771	0.54877	-0.160665	0.894926	-0.166559	1.62768	-0.193948	1.33483	1.54682	-0.160665
CDK1	Cyclin-dependent kinase 1	P06493	YES	YES	MALNHPYFNDLDNQIK	280	-0.0857103	0.544414	-0.0191732	0.0901636	-0.0778099	0.467468	-0.0960665	0.885791	0.969392	-0.0191732
CDK1	Cyclin-dependent kinase 1	P06493	YES	YES	DLKPQNLLIDDK	128	-0.142875	0.520098	-0.310031	1.08926	-0.408859	2.50507	-0.330602	1.85219	2.11282	-0.310031
CDK1	Cyclin-dependent kinase 1	P06493	YES	YES	HKTTGQVVAMK	23	0.283491	0.467362	-0.0767247	0.102499	0.0561766	0.0653977	-0.320605	0.579564	0.152645	-0.0767247
CDK1	Cyclin-dependent kinase 1	P06493	YES	YES	ELRHPNIVSLQDVLMQDSR	57	-0.279362	0.353323	-0.0999863	0.111323	-0.318148	0.581494	-0.505793	1.1004	1.25907	-0.0999863
CDK1	Cyclin-dependent kinase 1	P06493	YES	YES	HPNIVSLQDVLMQDSR	60	-0.103134	0.33946	-0.156054	1.14154	-0.444459	3.19317	-0.712647	3.57984	4.7245	-0.156054
CDK1	Cyclin-dependent kinase 1	P06493	YES	YES	IEKIGEGTYGVVYK	7	0.122545	0.31747	0.128806	0.333901	0.212295	0.71315	0.0944126	0.19201	0.719773	0.128806
CDK1	Cyclin-dependent kinase 1	P06493	YES	YES	VYTHEVVTLWYR	159	0.0537206	0.299695	0.0211149	0.115582	0.0589567	0.488115	0.0317371	0.200171	0.234058	0.0211149
CDK1	Cyclin-dependent kinase 1	P06493	YES	YES	MEDYTKIEK	1	0.175288	0.265687	0.0519807	0.0852751	0.128934	0.308659	0.0955541	0.192642	0.152644	0.0519807
CDK1	Cyclin-dependent kinase 1	P06493	YES	YES	EISLLKELR	51	-0.54995	0.252321	0.432104	0.222298	-0.156306	0.0647105	0.0915351	0.0425049	0.414093	0.432104
CDK1	Cyclin-dependent kinase 1	P06493	YES	YES	WKPGSLASHVK	244	0.0366535	0.249024	-0.0442455	0.295507	-0.086852	0.616305	-0.145731	1.38156	1.5142	-0.0442455
CDK1	Cyclin-dependent kinase 1	P06493	YES	YES	SYLYQILQGIVFCHSRR	107	-0.366412	0.210847	0.367273	0.312117	-0.347176	0.455132	-1.04992	0.783427	0.505542	0.367273
CDK1	Cyclin-dependent kinase 1	P06493	YES	YES	TTGQVVAMK	25	0.0961458	0.201635	-0.178366	0.436794	-0.0432832	0.0775082	-0.074647	0.140171	0.658905	-0.178366
CDK1	Cyclin-dependent kinase 1	P06493	YES	YES	IGEGTYGVVYKGR	10	-0.249001	0.187263	0.796455	0.853136	-0.313909	0.212757	-0.588412	0.757308	0.548371	0.796455
CDK1	Cyclin-dependent kinase 1	P06493	YES	YES	LYLIFEFLSMDLKK	76	-0.431459	0.174727	-0.145512	0.0626069	1.00394	0.634851	0.204105	0.0933712	0.489306	-0.145512
CDK1	Cyclin-dependent kinase 1	P06493	YES	YES	DLKPQNLLIDDKGTIKLADFGLAR	128	0.0143085	0.0125145	-0.676175	0.962726	-0.779768	0.741178	-0.793141	1.26115	0.708779	-0.676175
LYN	Tyrosine-protein kinase Lyn	P07948	YES	YES	TNADVMTALSQGYR	448	0.520026	0.979659	-0.0127841	0.0139953	-0.110492	0.159727	0.200844	0.254981	0.236155	-0.0127841
LYN	Tyrosine-protein kinase Lyn	P07948	YES	YES	ESIKLVK	245	-0.877811	0.889753	-1.06901	0.735049	-0.709398	0.414099	-1.9067	0.522245	0.228292	-1.06901
LYN	Tyrosine-protein kinase Lyn	P07948	YES	YES	VIEDNEYTAR	391	-1.48808	0.838396	0.142372	0.31393	0.454972	1.1097	0.262994	0.975771	1.34937	0.142372
LYN	Tyrosine-protein kinase Lyn	P07948	YES	YES	TLQHDKLVR	296	0.677111	0.792289	0.337537	0.38017	0.188898	0.185645	0.625015	0.645523	0.0351773	0.337537
LYN	Tyrosine-protein kinase Lyn	P07948	YES	YES	TLKPGTMSVQAFLEEANLMK	276	-0.495769	0.77826	-0.410219	0.240113	-0.0536928	0.0683071	-0.342069	0.401414	0.669081	-0.410219
LYN	Tyrosine-protein kinase Lyn	P07948	YES	YES	GSLLDFLK	325	0.415838	0.701992	0.278111	0.529395	0.0695493	0.173926	0.472104	1.47431	0.369343	0.278111
LYN	Tyrosine-protein kinase Lyn	P07948	YES	YES	LIDFSAQIAEGMAYIERK	344	-1.28125	0.519714	0.224035	0.415262	0.279748	0.695442	0.154755	0.271174	0.497412	0.224035
PFKM	ATP-dependent 6-phosphofructokinase, muscle type	P08237	NO	YES	NVLGHMQQGGSPTPFDRNFATK	657	-1.41303	1.44814	-0.0657942	0.0747891	-0.960278	0.552005	0.307863	0.74251	0.608687	-0.0657942
PFKM	ATP-dependent 6-phosphofructokinase, muscle type	P08237	NO	YES	ALVFQPVAELKDQTDFEHRIPK	717	-0.412424	1.21047	-0.301677	0.538034	-0.437453	1.35205	-0.730246	1.78376	1.10906	-0.301677
PFKM	ATP-dependent 6-phosphofructokinase, muscle type	P08237	NO	YES	SEWSDLLSDLQK	130	-0.369501	1.13505	-0.0372034	0.0908944	0.027245	0.103267	0.0869496	0.27751	0.208591	-0.0372034
PFKM	ATP-dependent 6-phosphofructokinase, muscle type	P08237	NO	YES	LNIIIVAEGAIDKNGKPITSEDIK	257	-0.331404	1.05164	-0.028303	0.029264	-0.515391	1.98045	-0.49955	1.54513	1.01493	-0.028303
PFKM	ATP-dependent 6-phosphofructokinase, muscle type	P08237	NO	YES	SFMNNWEVYK	377	-0.34874	0.975582	-0.228787	0.461867	-0.0171817	0.030943	-0.088039	0.174235	0.852521	-0.228787
PFKM	ATP-dependent 6-phosphofructokinase, muscle type	P08237	NO	YES	NVLGHMQQGGSPTPFDR	657	-0.249063	0.905601	-0.0118227	0.0254569	-0.0956487	0.305008	-0.160532	0.531076	0.59965	-0.0118227
PFKM	ATP-dependent 6-phosphofructokinase, muscle type	P08237	NO	YES	KFDEALK	366	-0.16082	0.868215	-0.237323	0.467649	-0.560033	1.01954	-0.295372	0.988293	0.901026	-0.237323
PFKM	ATP-dependent 6-phosphofructokinase, muscle type	P08237	NO	YES	KSFEQISANITK	476	0.454149	0.865576	0.067828	0.109259	0.254407	0.541457	0.305225	0.64567	0.645709	0.067828
PFKM	ATP-dependent 6-phosphofructokinase, muscle type	P08237	NO	YES	CNENYTTDFIFNLYSEEGK	631	0.9112	0.73312	-0.52639	0.426374	-0.0138851	0.00995964	-0.342916	0.180448	0.295553	-0.52639
PFKM	ATP-dependent 6-phosphofructokinase, muscle type	P08237	NO	YES	ALVFQPVAELKDQTDFEHR	717	0.398457	0.683036	0.406681	0.5686	-0.18326	0.108571	0.204217	0.200638	0.219591	0.406681
PFKM	ATP-dependent 6-phosphofructokinase, muscle type	P08237	NO	YES	VFFVHEGYQGLVDGGDHIK	48	-0.140382	0.674396	-0.0194392	0.0558327	-0.0997763	0.413978	-0.134093	0.646802	0.847517	-0.0194392
PFKM	ATP-dependent 6-phosphofructokinase, muscle type	P08237	NO	YES	SFEQISANITK	477	0.17885	0.625042	-0.0534213	0.126722	-0.195507	0.505268	-0.272263	0.845498	0.189915	-0.0534213
PFKM	ATP-dependent 6-phosphofructokinase, muscle type	P08237	NO	YES	LPLMECVQVTK	346	0.0751486	0.615939	0.0247625	0.124071	0.111679	1.20874	0.0943978	0.938482	0.885789	0.0247625
PFKM	ATP-dependent 6-phosphofructokinase, muscle type	P08237	NO	YES	LNIIIVAEGAIDK	257	-0.235545	0.498904	0.116634	0.23152	-0.0684252	0.141309	-0.103955	0.190724	0.368831	0.116634
PFKM	ATP-dependent 6-phosphofructokinase, muscle type	P08237	NO	YES	RGITNLCVIGGDGSLTGADTFR	108	0.339473	0.483585	0.0707189	0.080911	0.0162018	0.0185626	0.293696	0.449915	0.0408607	0.0707189
PFKM	ATP-dependent 6-phosphofructokinase, muscle type	P08237	NO	YES	SGSHTVAVMNVGAPAAGMNAAVR	398	-0.110788	0.482815	-0.0802131	0.238032	-0.0258928	0.123312	-0.152801	1.12042	0.523013	-0.0802131
PFKM	ATP-dependent 6-phosphofructokinase, muscle type	P08237	NO	YES	GITNLCVIGGDGSLTGADTFR	109	0.399242	0.459487	-0.44205	0.250254	-0.364231	0.235922	0.420632	0.446611	0.0908114	-0.44205
PFKM	ATP-dependent 6-phosphofructokinase, muscle type	P08237	NO	YES	SSYLNIVGLVGSIDNDFCGTDMTIGTDSALHR	153	-0.443043	0.440161	-0.365871	0.211884	-0.70198	0.735265	-0.824842	0.689817	1.19668	-0.365871
PFKM	ATP-dependent 6-phosphofructokinase, muscle type	P08237	NO	YES	AIAVLTSGGDAQGMNAAVR	17	-0.065792	0.392096	-0.039862	0.179678	-0.0416559	0.227859	-0.000222404	0.000947608	0.0300198	-0.039862
PFKM	ATP-dependent 6-phosphofructokinase, muscle type	P08237	NO	YES	YEIDLDTSDHAHLEHITR	755	-0.0790331	0.310184	-0.0188621	0.055877	-0.119977	0.570122	-0.117134	0.563984	0.632165	-0.0188621
PFKM	ATP-dependent 6-phosphofructokinase, muscle type	P08237	NO	YES	LLAHVRPPVSK	387	0.0948449	0.284999	0.00912965	0.0132376	0.119764	0.324098	-0.0511496	0.0773286	0.0222899	0.00912965
PFKM	ATP-dependent 6-phosphofructokinase, muscle type	P08237	NO	YES	ALVFQPVAELK	717	0.0706351	0.260933	0.0825018	0.344145	0.0622019	0.269806	0.0341704	0.0792608	0.273374	0.0825018
PFKM	ATP-dependent 6-phosphofructokinase, muscle type	P08237	NO	YES	VGIFTGAR	40	-0.0523454	0.252303	0.0208422	0.0899464	-0.0124696	0.0509592	0.0224943	0.0908803	0.0886679	0.0208422
PFKM	ATP-dependent 6-phosphofructokinase, muscle type	P08237	NO	YES	EATWESVSMMLQLGGTVIGSAR	67	-0.530279	0.220109	-0.39633	0.167644	-0.793289	0.327996	-1.15233	0.545636	0.208973	-0.39633
PFKM	ATP-dependent 6-phosphofructokinase, muscle type	P08237	NO	YES	AMNWMSGK	683	0.129991	0.212087	-0.00927747	0.0109566	0.322928	0.80266	0.313929	0.740129	0.37116	-0.00927747
PFKM	ATP-dependent 6-phosphofructokinase, muscle type	P08237	NO	YES	ILAKYEIDLDTSDHAHLEHITR	751	-0.109159	0.196496	-0.0198278	0.0245086	-0.0649638	0.115981	-0.629829	0.934334	0.302733	-0.0198278
PFKM	ATP-dependent 6-phosphofructokinase, muscle type	P08237	NO	YES	KNVLGHMQQGGSPTPFDR	656	0.102537	0.191288	-0.363859	0.760679	-0.162538	0.292694	-0.0161869	0.0202151	0.662982	-0.363859
PFKM	ATP-dependent 6-phosphofructokinase, muscle type	P08237	NO	YES	NEKCNENYTTDFIFNLYSEEGK	628	-0.60765	0.175616	-0.191527	0.0475546	0.621052	0.274278	-0.575227	0.170972	0.123382	-0.191527
PFKM	ATP-dependent 6-phosphofructokinase, muscle type	P08237	NO	YES	IFANTPDSGCVLGMR	700	0.0337121	0.170707	0.0165345	0.0776167	0.127201	1.0668	0.0930405	0.678467	1.08975	0.0165345
PFKM	ATP-dependent 6-phosphofructokinase, muscle type	P08237	NO	YES	IGLIQGNR	425	-0.0148461	0.0891384	0.0741398	0.520936	0.0174862	0.066524	0.020793	0.128242	0.23132	0.0741398
PFKM	ATP-dependent 6-phosphofructokinase, muscle type	P08237	NO	YES	GQIEEAGWSYVGGWTGQGGSK	446	0.0318	0.0701567	-0.0588975	0.134431	-0.00220585	0.00555202	0.00231062	0.00548148	0.0524999	-0.0588975
PFKM	ATP-dependent 6-phosphofructokinase, muscle type	P08237	NO	YES	MGVEAVMALLEGTPDTPACVVSLSGNQAVR	316	0.0435902	0.0665795	0.0790094	0.0984491	-0.179962	0.343173	-0.0415408	0.0748451	0.625865	0.0790094
PFKM	ATP-dependent 6-phosphofructokinase, muscle type	P08237	NO	YES	VLVVHDGFEGLAK	433	-0.00996885	0.0498968	0.00888533	0.040697	-0.040857	0.270879	-0.0291724	0.170918	0.45196	0.00888533
PFKM	ATP-dependent 6-phosphofructokinase, muscle type	P08237	NO	YES	DLQANVEHLVQK	604	-0.00599389	0.0241584	0.0205209	0.0877824	-0.0415024	0.190424	-0.0208562	0.0974803	0.536714	0.0205209
PFKM	ATP-dependent 6-phosphofructokinase, muscle type	P08237	NO	YES	IMEIVDAITTTAQSHQR	185	0.00978914	0.0114676	-0.186396	0.325539	-0.268233	0.404087	-0.268264	0.408924	0.423298	-0.186396
ARAF	Serine/threonine-protein kinase A-Raf	P10398	YES	YES	GSPSPASVSSGR	256	-1.18212	0.733687	-0.291945	0.113791	1.13461	0.673872	-0.27874	0.083933	0.499077	-0.291945
ARAF	Serine/threonine-protein kinase A-Raf	P10398	YES	YES	WSGAQPLEQPSGSVLWMAAEVIR	457	0.311593	0.638377	0.194101	0.338245	0.262279	0.575814	0.070436	0.105755	0.00630866	0.194101
ARAF	Serine/threonine-protein kinase A-Raf	P10398	YES	YES	VPTVCVDMSTNR	140	-0.284852	0.492287	0.176763	0.426702	0.244047	0.635176	0.0955057	0.235777	0.172457	0.176763
ARAF	Serine/threonine-protein kinase A-Raf	P10398	YES	YES	VSQPTAEQAQAFK	340	-0.250893	0.370748	0.177021	0.423185	0.0243543	0.0428301	-0.0789557	0.145397	0.25207	0.177021
ARAF	Serine/threonine-protein kinase A-Raf	P10398	YES	YES	GRWHGDVAVK	327	0.803214	0.34782	0.61977	0.251813	0.63499	0.269682	1.49062	1.04608	0.0161898	0.61977
ARAF	Serine/threonine-protein kinase A-Raf	P10398	YES	YES	FQREERPLFPQILATIELLQR	552	-0.40003	0.311276	-0.0578612	0.0741727	-0.568462	1.1799	-0.538788	0.956396	0.839281	-0.0578612
ARAF	Serine/threonine-protein kinase A-Raf	P10398	YES	YES	QQFYHSVQDLSGGSR	152	0.076023	0.27132	0.0835912	0.267413	0.186231	0.900337	0.108168	0.51413	0.620296	0.0835912
ARAF	Serine/threonine-protein kinase A-Raf	P10398	YES	YES	VSQPTAEQAQAFKNEMQVLR	340	-0.121806	0.269573	-0.131581	0.206821	-0.059329	0.114252	-0.156052	0.383381	0.788231	-0.131581
ARAF	Serine/threonine-protein kinase A-Raf	P10398	YES	YES	TQADELPACLLSAAR	589	0.0798946	0.26393	-0.0806954	0.315767	-0.0346386	0.121518	-0.253663	0.405108	0.396423	-0.0806954
ARAF	Serine/threonine-protein kinase A-Raf	P10398	YES	YES	EERPLFPQILATIELLQR	555	-0.189449	0.202924	0.177406	0.301998	-0.0403967	0.0695023	-0.237968	0.536771	0.307153	0.177406
ARAF	Serine/threonine-protein kinase A-Raf	P10398	YES	YES	GLNQDCCVVYR	53	-0.0561188	0.165149	0.13978	0.467518	0.18344	0.746259	0.143806	0.551131	0.382685	0.13978
ARAF	Serine/threonine-protein kinase A-Raf	P10398	YES	YES	IGTGSFGTVFR	316	-0.0302657	0.1376	0.0234665	0.0765034	0.108803	0.651296	0.0438003	0.192261	0.0142399	0.0234665
ARAF	Serine/threonine-protein kinase A-Raf	P10398	YES	YES	TQHCDPEHFPFPAPANAPLQR	189	-0.0329498	0.0772575	-0.0563986	0.101693	-0.0706756	0.149193	-0.303484	0.99783	0.794442	-0.0563986
ARAF	Serine/threonine-protein kinase A-Raf	P10398	YES	YES	GSPSPASVSSGRK	256	-0.141804	0.0706539	0.208531	0.269985	0.0613859	0.0650367	0.111636	0.124985	0.579062	0.208531
ARAF	Serine/threonine-protein kinase A-Raf	P10398	YES	YES	QHEAPSNRPLNELLTPQGPSPR	167	0.0412978	0.0679059	0.286512	0.586213	0.0501241	0.0697108	-0.18826	0.30771	0.0846476	0.286512
ARAF	Serine/threonine-protein kinase A-Raf	P10398	YES	YES	DGMSVYDSLDK	37	0.0681456	0.0222318	0.511862	0.205856	0.537447	0.205773	-0.388794	0.0943508	0.178846	0.511862
ARAF	Serine/threonine-protein kinase A-Raf	P10398	YES	YES	FDMVQLIDVAR	401	0.0124678	0.0180128	0.234618	0.459463	0.304111	0.84938	-0.104715	0.131582	0.286922	0.234618
BCR	Breakpoint cluster region protein	P11274	YES	YES	ISSLGSQAMQMERK	200	3.14979	0.874228	1.97782	0.424689	2.7349	0.66352	0.369067	0.0695211	1.77775	1.97782
BCR	Breakpoint cluster region protein	P11274	YES	YES	VSPSPTTYR	353	0.993666	0.844902	0.477697	0.339486	0.0945649	0.0417926	0.228361	0.132432	0.0989872	0.477697
BCR	Breakpoint cluster region protein	P11274	YES	YES	STLVLHDLLK	653	0.220328	0.797504	0.190786	0.564707	0.234533	0.932463	0.135074	0.436249	0.455656	0.190786
BCR	Breakpoint cluster region protein	P11274	YES	YES	ASELDLEKGLEMR	487	0.557971	0.737882	0.13357	0.111558	0.939441	1.42465	0.521965	0.586619	1.0936	0.13357
BCR	Breakpoint cluster region protein	P11274	YES	YES	HCPVVVSEATIVGVR	394	-0.546844	0.600027	-0.00785568	0.00511827	-0.409425	0.400032	0.360626	0.333395	0.564639	-0.00785568
BCR	Breakpoint cluster region protein	P11274	YES	YES	SVGDIEQELER	27	-0.100244	0.578732	0.0679294	0.349202	0.068644	0.394685	0.0771795	0.551959	0.682839	0.0679294
BCR	Breakpoint cluster region protein	P11274	YES	YES	SFSLTSVELQMLTNSCVK	871	0.660026	0.54435	-0.288594	0.197358	0.111072	0.0635141	0.227467	0.143569	0.0136073	-0.288594
BCR	Breakpoint cluster region protein	P11274	YES	YES	AFVDNYGVAMEMAEK	593	0.483988	0.531615	0.286726	0.324201	0.00230381	0.0016355	0.1123	0.08419	0.19913	0.286726
BCR	Breakpoint cluster region protein	P11274	YES	YES	ISSLGSQAMQMER	200	0.174092	0.512173	-0.0265451	0.044388	0.173714	0.525421	0.22682	0.619882	0.783605	-0.0265451
BCR	Breakpoint cluster region protein	P11274	YES	YES	KLSEQESLLLLMSPSMAFR	817	0.337824	0.493808	0.0832307	0.0690705	0.166985	0.154737	0.107552	0.108205	0.515463	0.0832307
BCR	Breakpoint cluster region protein	P11274	YES	YES	DSFMVELVEGAR	712	0.208127	0.439101	0.145901	0.313609	0.106208	0.238795	0.222972	0.585599	0.298467	0.145901
BCR	Breakpoint cluster region protein	P11274	YES	YES	QLLKDSFMVELVEGAR	708	-0.21292	0.430324	-0.170826	0.320964	-0.0582931	0.122731	-0.14512	0.279572	0.123836	-0.170826
BCR	Breakpoint cluster region protein	P11274	YES	YES	AAATTSQPVLTSQQIETIFFK	529	0.571869	0.422937	-0.321944	0.277586	-0.569672	0.528559	-0.0491763	0.0401271	0.46554	-0.321944
BCR	Breakpoint cluster region protein	P11274	YES	YES	KSQHGAGSSVGDASRPPYR	214	-0.633821	0.405774	0.286287	0.217838	0.128642	0.0859864	-1.27431	0.882304	0.281359	0.286287
BCR	Breakpoint cluster region protein	P11274	YES	YES	ASELDLEK	487	0.133022	0.397243	-0.0943652	0.139553	-0.143973	0.285588	0.0181548	0.0324279	0.0933657	-0.0943652
BCR	Breakpoint cluster region protein	P11274	YES	YES	MIYLQTLLAK	56	0.0955577	0.383228	0.164469	0.721751	0.157077	0.707698	0.192498	1.23419	1.00374	0.164469
BCR	Breakpoint cluster region protein	P11274	YES	YES	VDPVGFAEAWK	2	0.173092	0.378564	-0.0423112	0.0730605	0.245034	0.834403	0.34123	1.13384	0.463653	-0.0423112
BCR	Breakpoint cluster region protein	P11274	YES	YES	LSEQESLLLLMSPSMAFR	818	0.197347	0.362644	0.16982	0.278982	0.342497	0.882516	0.191367	0.326279	0.816756	0.16982
BCR	Breakpoint cluster region protein	P11274	YES	YES	SQHGAGSSVGDASRPPYR	215	-0.166272	0.355653	-0.534767	0.987706	-0.195664	0.447886	-0.241869	0.526932	2.26119	-0.534767
BCR	Breakpoint cluster region protein	P11274	YES	YES	HVFLFTDLLLCTK	727	-0.143399	0.325756	0.24243	0.723722	-0.0105753	0.026359	-0.0863071	0.21117	0.490185	0.24243
BCR	Breakpoint cluster region protein	P11274	YES	YES	DALVSGALESTK	475	0.0883646	0.299726	0.0985166	0.374664	0.143255	0.541202	0.012733	0.0349333	0.261829	0.0985166
BCR	Breakpoint cluster region protein	P11274	YES	YES	RLEQEVNQER	44	0.171727	0.296235	-0.120714	0.321054	0.139172	0.328213	-0.00876856	0.0195335	0.68948	-0.120714
BCR	Breakpoint cluster region protein	P11274	YES	YES	AAQAPDGASEPR	80	-0.359083	0.284209	-1.0156	1.11519	0.047023	0.0504745	-0.54731	0.401255	0.0734756	-1.0156
BCR	Breakpoint cluster region protein	P11274	YES	YES	EFYDGLFPR	559	-0.151534	0.280513	0.109409	0.214795	0.156394	0.318953	-0.000647626	0.000529926	0.628344	0.109409
BCR	Breakpoint cluster region protein	P11274	YES	YES	VPELYEIHKEFYDGLFPR	550	0.234142	0.248497	-0.338979	0.176298	0.118069	0.0781202	-0.172842	0.10372	0.0573744	-0.338979
BCR	Breakpoint cluster region protein	P11274	YES	YES	HRHCPVVVSEATIVGVR	392	0.196051	0.221756	0.561976	0.691613	0.340944	0.422271	0.232565	0.256259	0.721443	0.561976
BCR	Breakpoint cluster region protein	P11274	YES	YES	MVDPVGFAEAWK	1	0.164385	0.220331	-0.0215304	0.0214906	0.221299	0.343627	0.353357	0.70945	0.551906	-0.0215304
BCR	Breakpoint cluster region protein	P11274	YES	YES	VNDKEVSDR	191	-0.145354	0.205948	0.221307	0.335896	0.202887	0.318376	0.0485738	0.0616801	0.750073	0.221307
BCR	Breakpoint cluster region protein	P11274	YES	YES	VGDLFQK	577	-0.275631	0.205383	0.00573888	0.011947	0.0324852	0.0822303	0.109273	0.314705	0.0215939	0.00573888
BCR	Breakpoint cluster region protein	P11274	YES	YES	HTPASHPDHPLLQDALR	663	0.189357	0.18164	0.219264	0.207027	-0.128792	0.1297	-0.204261	0.212473	0.0876057	0.219264
BCR	Breakpoint cluster region protein	P11274	YES	YES	CCQANAQFAEISENLR	608	-0.0994589	0.171581	-0.0219815	0.031643	0.152175	0.386418	-0.0749133	0.136902	0.703768	-0.0219815
BCR	Breakpoint cluster region protein	P11274	YES	YES	VSGVATDIQALK	1091	-0.151876	0.0914726	0.630053	0.456677	0.185494	0.0735079	-0.130057	0.0558187	0.519044	0.630053
BCR	Breakpoint cluster region protein	P11274	YES	YES	NSLETLLYKPVDR	637	0.0171038	0.0573722	-0.106922	0.476239	0.0310985	0.100128	-0.133645	0.756025	0.439901	-0.106922
BCR	Breakpoint cluster region protein	P11274	YES	YES	LASQLGVYR	584	-0.0154429	0.0482068	0.113402	0.529606	0.15195	0.740579	0.108298	0.513442	0.386382	0.113402
BCR	Breakpoint cluster region protein	P11274	YES	YES	DDRGPPASVAALR	143	0.129985	0.0429497	1.80209	1.12928	0.79879	0.298977	0.966158	0.330459	0.660441	1.80209
BCR	Breakpoint cluster region protein	P11274	YES	YES	GPPASVAALR	146	-0.116739	0.0255627	0.7402	0.205016	-0.651743	0.162436	0.874719	0.265978	0.49026	0.7402
BCR	Breakpoint cluster region protein	P11274	YES	YES	ISQNFLSSINEEITPR	680	0.00140988	0.00523099	0.0364321	0.145328	0.0439993	0.163574	0.0189324	0.0799468	0.33606	0.0364321
BCR	Breakpoint cluster region protein	P11274	YES	YES	AQFPDSEPPRMELR	13	-0.0054905	0.00466576	0.194994	0.151518	-0.694363	0.338683	0.273427	0.233957	0.499701	0.194994
PIM1	Serine/threonine-protein kinase pim-1	P11309	YES	YES	VSSGFSGVIR	96	-1.15147	0.736178	-1.67035	2.69959	-2.02795	2.8307	-2.18992	3.09843	2.7488	-1.67035
PIM1	Serine/threonine-protein kinase pim-1	P11309	YES	YES	VSDNLPVAIK	58	-1.15179	0.71006	-2.15511	1.70787	-2.94418	2.71572	-2.22475	3.1165	2.7626	-2.15511
PIM1	Serine/threonine-protein kinase pim-1	P11309	YES	YES	SFFWQVLEAVR	146	-0.711933	0.500261	-1.03968	2.67754	-2.04724	4.67473	-2.53882	5.18289	4.903	-1.03968
PIM1	Serine/threonine-protein kinase pim-1	P11309	YES	YES	INSLAHLR	6	0.73153	0.494782	0.0406316	0.0170453	0.9736	0.692636	0.404843	0.267541	0.966657	0.0406316
PIM1	Serine/threonine-protein kinase pim-1	P11309	YES	YES	AAPCNDLHATK	14	0.0447829	0.0245242	0.30084	0.184199	0.548262	0.414124	-0.111196	0.0669391	0.928634	0.30084
CDK4	Cyclin-dependent kinase 4	P11802	YES	YES	GLDFLHANCIVHR	127	-0.577058	0.842419	-0.418727	0.628614	0.0310425	0.0525903	-0.0754172	0.127087	0.512493	-0.418727
CDK4	Cyclin-dependent kinase 4	P11802	YES	YES	MATSRYEPVAEIGVGAYGTVYK	1	-1.46103	0.794333	-0.477637	0.341149	-0.976528	0.860751	-0.651905	0.450037	0.463438	-0.477637
CDK4	Cyclin-dependent kinase 4	P11802	YES	YES	LMDVCATSR	74	0.14448	0.61984	0.0670828	0.204236	0.228756	1.15703	0.162589	0.986294	1.65774	0.0670828
CDK4	Cyclin-dependent kinase 4	P11802	YES	YES	RLEAFEHPNVVR	62	0.147999	0.375885	0.212957	0.789139	0.193721	0.699322	0.0977052	0.324024	0.83046	0.212957
CDK4	Cyclin-dependent kinase 4	P11802	YES	YES	LEAFEHPNVVR	63	0.640087	0.286487	0.687871	0.333148	1.84508	0.862634	0.444483	0.225524	0.236457	0.687871
CDK4	Cyclin-dependent kinase 4	P11802	YES	YES	ARDPHSGHFVALK	23	0.2205	0.257075	-0.13453	0.128222	0.0371777	0.0453755	-0.168933	0.250979	0.128363	-0.13453
CDK4	Cyclin-dependent kinase 4	P11802	YES	YES	SVRVPNGGGGGGGLPISTVR	36	0.111201	0.25564	-0.0796835	0.146323	-0.0146098	0.0207865	0.233232	0.710875	0.872095	-0.0796835
CDK4	Cyclin-dependent kinase 4	P11802	YES	YES	VTLVFEHVDQDLR	89	0.273277	0.252581	0.485324	0.503562	0.262696	0.261392	0.369037	0.388637	0.31328	0.485324
CDK4	Cyclin-dependent kinase 4	P11802	YES	YES	DLKPENILVTSGGTVK	140	-0.198533	0.20957	-0.0634077	0.0695487	-0.52313	0.71118	-0.454981	0.556857	0.415365	-0.0634077
CDK4	Cyclin-dependent kinase 4	P11802	YES	YES	YEPVAEIGVGAYGTVYK	6	-0.0924196	0.176553	-0.0170631	0.0353835	0.189162	0.681553	-0.10319	0.336821	0.246182	-0.0170631
CDK4	Cyclin-dependent kinase 4	P11802	YES	YES	VPNGGGGGGGLPISTVR	39	0.0557127	0.147164	0.0652923	0.293749	0.022772	0.103354	-0.142375	0.965913	1.51296	0.0652923
PRPS2	Ribose-phosphate pyrophosphokinase 2	P11908	NO	YES	RVTSIADRLNVEFALIHK	177	-0.250952	0.68127	-0.201571	0.359713	-0.0578487	0.131648	-0.182387	0.41437	0.148704	-0.201571
PRPS2	Ribose-phosphate pyrophosphokinase 2	P11908	NO	YES	MVLVGDVKDR	205	0.249505	0.595715	0.280127	1.0367	0.00797348	0.0215788	0.00269317	0.0102495	0.211774	0.280127
PRPS2	Ribose-phosphate pyrophosphokinase 2	P11908	NO	YES	VAILVDDMADTCGTICHAADKLLSAGATK	215	-0.235965	0.540504	0.0213429	0.022593	-0.359376	1.13187	-0.5265	1.61193	0.805282	0.0213429
PRPS2	Ribose-phosphate pyrophosphokinase 2	P11908	NO	YES	RTHNGESVSYLFSHVPL	302	0.272249	0.529439	0.028396	0.0403711	-0.110968	0.178326	0.0639288	0.0856505	0.285764	0.028396
PRPS2	Ribose-phosphate pyrophosphokinase 2	P11908	NO	YES	VYAILTHGIFSGPAISR	244	0.0707031	0.478114	0.0487753	0.248525	0.0226225	0.14974	0.0443274	0.339458	0.0939041	0.0487753
PRPS2	Ribose-phosphate pyrophosphokinase 2	P11908	NO	YES	ENIAEWK	157	0.244149	0.457398	-0.979797	0.49801	-0.243984	0.282635	-0.242771	0.394786	0.0210285	-0.979797
PRPS2	Ribose-phosphate pyrophosphokinase 2	P11908	NO	YES	VTAVIPCFPYAR	85	0.0721089	0.402719	0.0555159	0.275207	0.0809358	0.440943	0.0991458	0.56832	0.0892108	0.0555159
PRPS2	Ribose-phosphate pyrophosphokinase 2	P11908	NO	YES	VAILVDDMADTCGTICHAADK	215	-0.134103	0.390697	-0.221127	0.35147	-0.385943	0.777572	-0.1049	0.31131	1.10371	-0.221127
PRPS2	Ribose-phosphate pyrophosphokinase 2	P11908	NO	YES	INNAAFEAVVVTNTIPQEDK	261	-0.194658	0.369896	-0.0233898	0.0282597	-0.05384	0.0912934	0.0555745	0.0743423	0.15352	-0.0233898
PRPS2	Ribose-phosphate pyrophosphokinase 2	P11908	NO	YES	IQVIDISMILAEAIR	287	0.372337	0.314568	0.00666763	0.00748447	-0.230914	0.356956	-0.116978	0.143991	0.201011	0.00666763
PRPS2	Ribose-phosphate pyrophosphokinase 2	P11908	NO	YES	MVLVGDVK	205	0.0925675	0.300848	-0.119006	0.404791	-0.083254	0.271564	0.0444221	0.139228	0.621543	-0.119006
PRPS2	Ribose-phosphate pyrophosphokinase 2	P11908	NO	YES	INNAAFEAVVVTNTIPQEDKMK	261	-0.0923583	0.279921	-0.178026	0.263083	-0.523029	0.757894	-0.203385	1.40065	0.572271	-0.178026
PRPS2	Ribose-phosphate pyrophosphokinase 2	P11908	NO	YES	PNIVLFSGSSHQDLSQR	2	-0.0483806	0.208798	0.00235692	0.00902287	-0.00633323	0.0275111	-0.057429	0.3156	0.208368	0.00235692
PRPS2	Ribose-phosphate pyrophosphokinase 2	P11908	NO	YES	LNVEFALIHKER	185	-0.20861	0.190329	0.0136662	0.0100495	-1.05815	0.999703	-0.141743	0.148694	1.63054	0.0136662
PRPS2	Ribose-phosphate pyrophosphokinase 2	P11908	NO	YES	LNVEFALIHK	185	0.0817362	0.188499	0.025181	0.0525435	-0.0517088	0.101314	0.0976525	0.24661	0.182259	0.025181
PRPS2	Ribose-phosphate pyrophosphokinase 2	P11908	NO	YES	VTSIADRLNVEFALIHKER	178	-0.159399	0.173413	-0.0546989	0.0470986	-0.844209	0.830185	-0.838673	1.68529	0.2481	-0.0546989
PRPS2	Ribose-phosphate pyrophosphokinase 2	P11908	NO	YES	NCIIVSPDAGGAKR	164	-0.0548274	0.167049	-0.0852533	0.322136	-0.0227565	0.0665769	-0.206825	0.931034	1.35665	-0.0852533
PRPS2	Ribose-phosphate pyrophosphokinase 2	P11908	NO	YES	LGLELGK	23	0.105086	0.16445	0.336025	0.738343	0.277548	0.71629	0.0996714	0.205111	0.220515	0.336025
PRPS2	Ribose-phosphate pyrophosphokinase 2	P11908	NO	YES	THNGESVSYLFSHVPL	303	-0.0341082	0.0957239	-0.0440221	0.14921	-0.0163559	0.0421294	-0.0100047	0.0293146	0.311821	-0.0440221
PRPS2	Ribose-phosphate pyrophosphokinase 2	P11908	NO	YES	SRAPISAK	103	0.237989	0.0912544	0.406263	0.192047	0.302786	0.114091	-0.00142634	0.000394632	0.571068	0.406263
PRPS2	Ribose-phosphate pyrophosphokinase 2	P11908	NO	YES	NCIIVSPDAGGAK	164	-0.0232393	0.0893018	-0.0986717	0.368352	-0.0950994	0.585074	-0.0312516	0.109284	0.781857	-0.0986717
PRPS2	Ribose-phosphate pyrophosphokinase 2	P11908	NO	YES	VADRLGLELGK	19	-0.0488886	0.0750608	0.131049	0.257862	-0.0271791	0.0566489	-0.161466	0.431075	0.612702	0.131049
PRPS2	Ribose-phosphate pyrophosphokinase 2	P11908	NO	YES	IQVIDISMILAEAIRR	287	-0.0492457	0.0614955	0.0831099	0.342875	-0.069025	0.299862	-0.0285143	0.0862883	0.457096	0.0831099
PRPS2	Ribose-phosphate pyrophosphokinase 2	P11908	NO	YES	FSNQETSVEIGESVR	35	-0.0651584	0.0423759	0.510297	0.678441	-0.106046	0.0664779	-0.39778	0.312804	0.77907	0.510297
PRPS2	Ribose-phosphate pyrophosphokinase 2	P11908	NO	YES	RVTSIADR	177	0.0167511	0.0383192	-0.125186	0.331386	0.0638393	0.152586	0.20563	0.68839	0.182789	-0.125186
PRPS2	Ribose-phosphate pyrophosphokinase 2	P11908	NO	YES	LLSAGATK	236	-0.0285009	0.0167912	-0.106086	0.0463987	0.209492	0.163751	-0.00588384	0.00436106	0.207263	-0.106086
PRPS2	Ribose-phosphate pyrophosphokinase 2	P11908	NO	YES	VTSIADRLNVEFALIHK	178	0.000766998	0.00128975	0.101113	0.248401	0.0702042	0.201367	-0.134025	0.420456	0.311933	0.101113
CKB	Creatine kinase B-type	P12277	NO	YES	TFLVWVNEEDHLR	224	0.666234	1.07114	0.055157	0.0757747	-0.0464628	0.0727883	0.668692	0.633475	0.207371	0.055157
CKB	Creatine kinase B-type	P12277	NO	YES	LRFPAEDEFPDLSAHNNHMAK	12	-0.684708	0.912037	-0.553626	0.882488	-0.483968	0.841271	-0.011865	0.0102285	0.533802	-0.553626
CKB	Creatine kinase B-type	P12277	NO	YES	PFSNSHNALK	2	0.218319	0.783899	0.190627	0.798013	0.10583	0.607267	0.253837	1.21437	0.586325	0.190627
CKB	Creatine kinase B-type	P12277	NO	YES	SKDYEFMWNPHLGYILTCPSNLGTGLR	266	0.427562	0.487446	-0.706821	0.788469	-0.164933	0.168913	0.411402	0.614	0.200766	-0.706821
CKB	Creatine kinase B-type	P12277	NO	YES	FCTGLTQIETLFK	253	0.198591	0.447531	-0.233069	0.72529	-0.147584	0.366352	0.443822	0.808386	0.0705073	-0.233069
CKB	Creatine kinase B-type	P12277	NO	YES	VLTPELYAELR	33	0.0951567	0.416102	-0.0645761	0.301892	-0.0933603	0.522889	0.266527	0.838581	0.0875224	-0.0645761
CKB	Creatine kinase B-type	P12277	NO	YES	SMTEAEQQQLIDDHFLFDKPVSPLLLASGMAR	178	-0.6954	0.311382	-1.17308	0.923173	-1.41272	1.1815	-0.852418	0.476069	0.309356	-1.17308
CKB	Creatine kinase B-type	P12277	NO	YES	LGFSEVELVQMVVDGVK	342	0.237689	0.295353	-0.277906	0.346617	0.0236338	0.0222722	0.475353	0.517642	0.008448	-0.277906
CKB	Creatine kinase B-type	P12277	NO	YES	LAVEALSSLDGDLAGR	157	0.143773	0.201206	-0.124426	0.132973	-0.178982	0.179184	0.293449	0.581978	0.141866	-0.124426
CKB	Creatine kinase B-type	P12277	NO	YES	GTGGVDTAAVGGVFDVSNADR	321	0.510534	0.17608	-0.179764	0.0678324	0.75034	0.347734	0.501281	0.137472	0.00426816	-0.179764
CKB	Creatine kinase B-type	P12277	NO	YES	RGTGGVDTAAVGGVFDVSNADR	320	0.182836	0.167552	-1.23034	1.688	-0.313775	0.298875	-1.07055	1.02391	0.617409	-1.23034
CKB	Creatine kinase B-type	P12277	NO	YES	LEQGQAIDDLMPAQK	367	-0.119929	0.110617	-1.37833	1.1778	-0.590097	0.758987	-0.0171081	0.00930819	0.457773	-1.37833
CKB	Creatine kinase B-type	P12277	NO	YES	FSEVLKR	308	0.0622281	0.0713914	-0.854595	0.439853	0.0909694	0.168555	0.309216	0.694914	0.277637	-0.854595
CKB	Creatine kinase B-type	P12277	NO	YES	DLFDPIIEDR	87	-0.0478849	0.0424678	-0.0171682	0.0193754	-0.099284	0.0775472	0.405444	0.609047	0.145647	-0.0171682
CKB	Creatine kinase B-type	P12277	NO	YES	LLIEMEQR	359	-0.00333078	0.00443063	-0.292701	1.20521	-0.215178	0.748052	0.416845	0.684146	0.381071	-0.292701
PKM	Pyruvate kinase PKM	P14618	NO	YES	TATESFASDPILYRPVAVALDTKGPEIR	93	-0.262988	1.58318	-0.112637	0.211866	-0.404423	2.85456	-0.373995	2.00095	1.57476	-0.112637
PKM	Pyruvate kinase PKM	P14618	NO	YES	KGVNLPGAAVDLPAVSEKDIQDLK	207	-0.328484	1.24509	0.0620942	0.115965	-0.400406	1.54306	-0.389114	0.692508	1.68639	0.0620942
PKM	Pyruvate kinase PKM	P14618	NO	YES	DIQDLKFGVEQDVDMVFASFIR	225	0.703168	1.04654	-0.318064	0.435386	-0.18767	0.251135	-0.10709	0.125212	0.113437	-0.318064
PKM	Pyruvate kinase PKM	P14618	NO	YES	QKGADFLVTEVENGGSLGSKK	187	-0.370367	1.00404	-0.125531	0.196678	-0.260969	0.585549	-0.259678	0.803165	0.68048	-0.125531
PKM	Pyruvate kinase PKM	P14618	NO	YES	SKPHSEAGTAFIQTQQLHAAMADTFLEHMCR	2	-0.57189	0.988491	-0.3982	0.45609	-0.1451	0.705979	-0.10799	0.816908	0.545864	-0.3982
PKM	Pyruvate kinase PKM	P14618	NO	YES	KGVNLPGAAVDLPAVSEK	207	0.46189	0.970086	0.189299	0.264265	-0.338589	0.3093	0.333866	0.585987	0.00169778	0.189299
PKM	Pyruvate kinase PKM	P14618	NO	YES	GADFLVTEVENGGSLGSKK	189	-0.128565	0.904342	-0.147362	0.600032	-0.275922	1.85856	-0.156599	1.30909	0.6875	-0.147362
PKM	Pyruvate kinase PKM	P14618	NO	YES	GVNLPGAAVDLPAVSEKDIQDLK	208	-0.164645	0.829543	-0.0798799	0.173624	-0.362875	1.79758	-0.249001	0.954119	0.943935	-0.0798799
PKM	Pyruvate kinase PKM	P14618	NO	YES	MQHLIAR	377	0.297936	0.806504	0.38135	0.663312	0.285009	0.45133	0.613896	2.01298	0.396988	0.38135
PKM	Pyruvate kinase PKM	P14618	NO	YES	LAPITSDPTEATAVGAVEASFKCCSGAIIVLTK	401	-0.992573	0.715884	0.113803	0.0622304	-0.797049	0.487376	-0.308624	0.191572	0.538893	0.113803
PKM	Pyruvate kinase PKM	P14618	NO	YES	LNFSHGTHEYHAETIKNVR	74	0.888274	0.69942	0.611549	0.443906	0.613507	0.450083	0.310326	0.206922	0.12626	0.611549
PKM	Pyruvate kinase PKM	P14618	NO	YES	IISKIENHEGVR	267	-0.242624	0.666136	-0.102222	0.395189	-0.265211	0.87105	0.0490544	0.190838	0.0798263	-0.102222
PKM	Pyruvate kinase PKM	P14618	NO	YES	SKPHSEAGTAFIQTQQLHAAMADTFLEHMCRLDIDSPPITAR	2	-1.30157	0.660755	-0.196498	0.135251	-0.713739	1.36507	-1.05319	1.30999	1.40404	-0.196498
PKM	Pyruvate kinase PKM	P14618	NO	YES	AEGSDVANAVLDGADCIMLSGETAKGDYPLEAVR	343	-0.341104	0.572784	0.0816594	0.0786732	-0.47531	1.24455	-0.385529	0.748416	0.895979	0.0816594
PKM	Pyruvate kinase PKM	P14618	NO	YES	APIIAVTRNPQTAR	448	0.243982	0.572691	-0.15797	0.262544	-0.089307	0.121775	-0.171243	0.308379	0.199507	-0.15797
PKM	Pyruvate kinase PKM	P14618	NO	YES	CDENILWLDYK	152	-0.365701	0.543047	-0.0348519	0.146849	0.0420203	0.251147	0.167986	1.45944	1.63302	-0.0348519
PKM	Pyruvate kinase PKM	P14618	NO	YES	FGVEQDVDMVFASFIR	231	0.125379	0.53204	-0.0771964	0.26623	-0.115804	0.549116	-0.00867219	0.0298869	0.0529075	-0.0771964
PKM	Pyruvate kinase PKM	P14618	NO	YES	AEGSDVANAVLDGADCIMLSGETAK	343	0.557329	0.516572	0.217289	0.186298	-0.0450818	0.0358221	0.0803811	0.065624	0.085786	0.217289
PKM	Pyruvate kinase PKM	P14618	NO	YES	NICKVVEVGSK	163	-0.195619	0.50577	-0.690771	0.883592	-0.302126	0.588072	-0.152975	0.290947	1.1825	-0.690771
PKM	Pyruvate kinase PKM	P14618	NO	YES	AGKPVICATQMLESMIK	320	0.075147	0.502217	-0.06917	0.321904	-0.0179718	0.11487	0.0963704	0.988783	1.34494	-0.06917
PKM	Pyruvate kinase PKM	P14618	NO	YES	GADFLVTEVENGGSLGSK	189	-0.0874405	0.500169	-0.115076	0.6726	-0.172532	1.48363	-0.0159632	0.0963847	0.0113334	-0.115076
PKM	Pyruvate kinase PKM	P14618	NO	YES	FGVEQDVDMVFASFIRK	231	0.110761	0.406754	-0.0468886	0.139821	0.0571511	0.205557	0.109361	0.480095	0.689868	-0.0468886
PKM	Pyruvate kinase PKM	P14618	NO	YES	SVETLKEMIK	57	0.102787	0.386721	-0.0326882	0.102181	-0.11744	0.729329	-0.0303518	0.147292	0.665167	-0.0326882
PKM	Pyruvate kinase PKM	P14618	NO	YES	TATESFASDPILYRPVAVALDTK	93	-0.0773867	0.357506	-0.0978009	0.306487	-0.299829	1.91092	-0.116086	0.55885	0.781193	-0.0978009
PKM	Pyruvate kinase PKM	P14618	NO	YES	LAPITSDPTEATAVGAVEASFK	401	-0.0736908	0.338837	-0.127386	0.380751	-0.336999	2.21737	-0.0724979	0.36426	0.266214	-0.127386
PKM	Pyruvate kinase PKM	P14618	NO	YES	RLAPITSDPTEATAVGAVEASFK	400	-0.110239	0.335194	-0.113892	0.227542	-0.404328	1.78865	-0.266352	1.05375	0.6745	-0.113892
PKM	Pyruvate kinase PKM	P14618	NO	YES	KASDVHEVR	247	0.641561	0.322463	0.647323	0.328401	0.748312	0.39829	0.811614	0.44031	0.411389	0.647323
PKM	Pyruvate kinase PKM	P14618	NO	YES	NTGIICTIGPASR	44	-0.0632625	0.321843	-0.103358	0.700021	-0.082404	0.47983	0.0632119	0.427946	0.322922	-0.103358
PKM	Pyruvate kinase PKM	P14618	NO	YES	SGMNVAR	67	0.407205	0.29769	0.119956	0.0731677	-0.0370468	0.0226147	-0.105443	0.0686919	0.177938	0.119956
PKM	Pyruvate kinase PKM	P14618	NO	YES	ITLDNAYMEK	142	0.0598279	0.265421	-0.0967048	0.551641	-0.0919246	0.367751	0.147241	1.05686	0.712679	-0.0967048
PKM	Pyruvate kinase PKM	P14618	NO	YES	GVNLPGAAVDLPAVSEK	208	-0.109701	0.232346	-0.18651	0.296289	-0.240275	0.700562	-0.0128025	0.0260883	0.0930804	-0.18651
PKM	Pyruvate kinase PKM	P14618	NO	YES	EAEAAIYHLQLFEELRR	384	0.0387074	0.204697	-0.00810413	0.0426654	-0.0948168	0.862397	-0.0246219	0.146134	0.146799	-0.00810413
PKM	Pyruvate kinase PKM	P14618	NO	YES	IENHEGVR	271	-0.100685	0.192319	-0.127477	0.231144	0.0203328	0.0385479	0.300421	0.936658	0.382656	-0.127477
PKM	Pyruvate kinase PKM	P14618	NO	YES	GIFPVLCKDPVQEAWAEDVDLR	468	-0.132368	0.169548	0.124702	0.258264	-0.176956	0.359639	-0.433609	1.54684	0.0423394	0.124702
PKM	Pyruvate kinase PKM	P14618	NO	YES	GSGTAEVELK	126	0.0365739	0.153767	-0.143626	0.980205	-0.142774	0.903315	0.0140604	0.0730785	0.298608	-0.143626
PKM	Pyruvate kinase PKM	P14618	NO	YES	EAEAAIYHLQLFEELR	384	-0.0264193	0.153232	-0.114736	0.813348	-0.157055	1.17114	-0.114889	1.07526	0.0210027	-0.114736
PKM	Pyruvate kinase PKM	P14618	NO	YES	RFDEILEASDGIMVAR	279	0.0165786	0.135765	-0.0972104	0.977677	-0.0703269	0.670499	0.0192627	0.171901	0.582532	-0.0972104
PKM	Pyruvate kinase PKM	P14618	NO	YES	GIFPVLCK	468	0.0625445	0.134879	-0.00343164	0.00710981	-0.118871	0.226437	0.213173	0.707779	0.401011	-0.00343164
PKM	Pyruvate kinase PKM	P14618	NO	YES	QKGADFLVTEVENGGSLGSK	187	0.16385	0.134512	0.334744	0.312954	-0.325532	0.222093	-0.604665	0.657083	0.190501	0.334744
PKM	Pyruvate kinase PKM	P14618	NO	YES	GDYPLEAVR	368	0.0337227	0.122968	0.0155418	0.0549449	-0.126974	0.47469	0.100133	0.479052	0.0634093	0.0155418
PKM	Pyruvate kinase PKM	P14618	NO	YES	KGDVVIVLTGWRPGSGFTNTMR	505	0.0323575	0.101027	-0.0532863	0.13567	-0.0896594	0.323427	-0.0959763	0.27507	0.338861	-0.0532863
PKM	Pyruvate kinase PKM	P14618	NO	YES	APIIAVTR	448	-0.0318127	0.0846261	1.9701e-05	6.67827e-05	-0.051307	0.172286	0.190194	0.93958	0.413966	1.9701e-05
PKM	Pyruvate kinase PKM	P14618	NO	YES	GSGTAEVELKK	126	-0.0354908	0.0682059	-0.0196704	0.0408658	-0.136399	0.353787	0.136472	0.347107	0.0155973	-0.0196704
PKM	Pyruvate kinase PKM	P14618	NO	YES	LNFSHGTHEYHAETIK	74	-0.0258384	0.0488959	0.0338317	0.0529756	-0.205718	0.424107	-0.054096	0.102036	0.283912	0.0338317
PKM	Pyruvate kinase PKM	P14618	NO	YES	VNFAMNVGK	490	0.0128591	0.0436501	-0.105795	0.587661	-0.117482	0.612975	0.122422	0.714502	0.299902	-0.105795
PKM	Pyruvate kinase PKM	P14618	NO	YES	TGLIKGSGTAEVELK	121	0.0301579	0.0430881	-0.123713	0.198241	-0.397531	0.735031	-0.159952	0.257193	0.136452	-0.123713
PKM	Pyruvate kinase PKM	P14618	NO	YES	ITLDNAYMEKCDENILWLDYK	142	0.0187836	0.0384428	0.0299302	0.0538972	-0.00787644	0.0155941	-0.0704675	0.145951	0.294869	0.0299302
PKM	Pyruvate kinase PKM	P14618	NO	YES	IYVDDGLISLQVK	174	0.0246419	0.0220341	0.141787	0.140364	-0.0815242	0.0759807	-0.380978	0.454843	0.344072	0.141787
PKM	Pyruvate kinase PKM	P14618	NO	YES	GDVVIVLTGWRPGSGFTNTMR	506	0.00400241	0.00855849	0.0973711	0.226975	0.0135268	0.0341792	-0.0197099	0.0448606	0.375349	0.0973711
PKM	Pyruvate kinase PKM	P14618	NO	YES	LDIDSPPITAR	33	-0.00100767	0.00367813	-0.0786926	0.436524	-0.0844918	0.56943	0.095395	0.669948	0.375897	-0.0786926
PKM	Pyruvate kinase PKM	P14618	NO	YES	CCSGAIIVLTK	423	0.000126352	0.000515489	-0.0797816	0.509328	-0.063548	0.568867	0.046328	0.224406	0.990745	-0.0797816
BRAF	Serine/threonine-protein kinase B-raf	P15056	YES	YES	TPIQAGGYGAFPVH	753	-0.3148	1.55314	0.0765193	0.200915	0.103741	0.310695	-0.11074	0.251248	0.0102472	0.0765193
BRAF	Serine/threonine-protein kinase B-raf	P15056	YES	YES	SNNIFLHEDLTVK	579	1.35883	0.746376	-0.0367666	0.0198161	2.22951	1.17295	-0.330043	0.189514	0.731628	-0.0367666
BRAF	Serine/threonine-protein kinase B-raf	P15056	YES	YES	DQGFRGDGGSTTGLSATPPASLPGSLTNVK	385	-0.567203	0.600764	-0.0818297	0.15266	-0.891296	1.10938	-0.346415	0.950336	0.390937	-0.0818297
BRAF	Serine/threonine-protein kinase B-raf	P15056	YES	YES	SIPIPQPFRPADEDHR	339	-0.551603	0.463957	-1.09803	1.19906	-0.719051	0.65463	-0.896707	1.06449	1.34412	-1.09803
BRAF	Serine/threonine-protein kinase B-raf	P15056	YES	YES	LMAECLK	692	0.284699	0.350485	0.384174	0.538007	0.351149	0.371583	0.289332	0.258135	1.427	0.384174
BRAF	Serine/threonine-protein kinase B-raf	P15056	YES	YES	LMAECLKK	692	-0.654006	0.253797	2.04191	1.8685	1.82938	0.950048	0.499923	0.168103	1.48915	2.04191
BRAF	Serine/threonine-protein kinase B-raf	P15056	YES	YES	AGFQTEDFSLYACASPK	736	0.305698	0.240274	-0.0720432	0.107255	-0.318682	0.596888	-0.350291	0.708761	0.0410479	-0.0720432
BRAF	Serine/threonine-protein kinase B-raf	P15056	YES	YES	GYLSPDLSKVR	672	-0.210562	0.229143	0.109437	0.121051	0.227383	0.290682	0.150946	0.186635	0.428128	0.109437
BRAF	Serine/threonine-protein kinase B-raf	P15056	YES	YES	MLNVTAPTPQQLQAFK	484	0.361727	0.167454	0.362135	0.181968	1.62825	1.22334	1.90551	1.49706	2.13189	0.362135
BRAF	Serine/threonine-protein kinase B-raf	P15056	YES	YES	GYLSPDLSK	672	0.0364121	0.143257	0.108001	0.514473	0.0785209	0.398704	0.107468	0.490766	0.24702	0.108001
BRAF	Serine/threonine-protein kinase B-raf	P15056	YES	YES	SPQKPIVR	151	0.0789341	0.0656358	0.529475	0.874936	-0.0480677	0.0438277	0.0483899	0.0490935	0.175062	0.529475
BRAF	Serine/threonine-protein kinase B-raf	P15056	YES	YES	MLNVTAPTPQQLQAFKNEVGVLR	484	0.048189	0.0539527	0.314916	0.42031	0.0671905	0.0609641	-0.843528	0.834983	0.123787	0.314916
BRAF	Serine/threonine-protein kinase B-raf	P15056	YES	YES	WSGSHQFEQLSGSILWMAPEVIR	604	-0.0966061	0.0496456	0.135361	0.0741464	0.206032	0.130217	0.595624	0.599782	0.485752	0.135361
BRAF	Serine/threonine-protein kinase B-raf	P15056	YES	YES	GLIPECCAVYR	189	0.0114607	0.0448082	0.0608493	0.288087	0.150785	1.06541	0.155348	1.24544	0.523493	0.0608493
BRAF	Serine/threonine-protein kinase B-raf	P15056	YES	YES	KPIGWDTDISWLTGEELHVEVLENVPLTTHNFVR	206	-0.0279275	0.00632568	-0.0693488	0.016114	0.6633	0.289038	-0.121144	0.0304865	0.0293402	-0.0693488
NME1	Nucleoside diphosphate kinase A	P15531	NO	YES	DRPFFAGLVK	57	0.0453854	0.144584	0.0124914	0.0349218	-0.0243804	0.0724549	-0.02717	0.0782203	0.843264	0.0124914
NME1	Nucleoside diphosphate kinase A	P15531	NO	YES	NIIHGSDSVESAEK	115	0.0615504	0.0814129	0.133829	0.198356	-0.0777559	0.121843	0.228642	0.419797	0.599222	0.133829
NME1	Nucleoside diphosphate kinase A	P15531	NO	YES	DRPFFAGLVKYMHSGPVVAMVWEGLNVVK	57	-0.0640505	0.0377501	-0.119399	0.109912	-0.980888	1.80961	-0.108692	0.10757	0.989916	-0.119399
NME1	Nucleoside diphosphate kinase A	P15531	NO	YES	YMHSGPVVAMVWEGLNVVK	67	0.00803295	0.00776927	0.00112882	0.000932778	-0.0278376	0.0360673	0.146153	0.145978	0.0144797	0.00112882
PHKG2	Phosphorylase b kinase gamma catalytic chain, liver/testis isoform	P15735	YES	YES	SLLEAVSFLHANNIVHR	136	-2.67988	4.15747	-2.74927	4.40192	-2.99783	4.54749	-3.12282	3.59893	3.70462	-2.74927
PHKG2	Phosphorylase b kinase gamma catalytic chain, liver/testis isoform	P15735	YES	YES	LLQVDPEAR	271	-4.79655	3.40863	-5.50029	8.42374	-6.00153	7.93984	-5.31433	4.78108	7.50613	-5.50029
PHKG2	Phosphorylase b kinase gamma catalytic chain, liver/testis isoform	P15735	YES	YES	LTAEQALQHPFFER	280	-2.46419	3.24733	-3.05469	5.78817	-3.76288	4.03511	-3.06719	6.17088	4.01672	-3.05469
PHKG2	Phosphorylase b kinase gamma catalytic chain, liver/testis isoform	P15735	YES	YES	IMEVTAER	54	-1.90202	3.16286	-3.35697	3.82758	-2.87463	4.17412	-3.71175	4.77485	3.86756	-3.35697
PHKG2	Phosphorylase b kinase gamma catalytic chain, liver/testis isoform	P15735	YES	YES	DLKPENILLDDNMQIR	153	-2.36263	3.02435	-2.1856	3.25785	-2.24204	3.03162	-2.74415	3.83107	3.08142	-2.1856
PHKG2	Phosphorylase b kinase gamma catalytic chain, liver/testis isoform	P15735	YES	YES	LSPEQLEEVR	62	-2.51951	1.3703	-2.10277	1.69331	-4.65626	3.0913	-3.54831	2.19792	5.90752	-2.10277
PHKG2	Phosphorylase b kinase gamma catalytic chain, liver/testis isoform	P15735	YES	YES	TLDVGPEDELPDWAAAK	2	-1.86201	0.959597	-2.68943	1.49093	-2.3893	1.25833	-2.21229	1.16384	1.20598	-2.68943
PHKG2	Phosphorylase b kinase gamma catalytic chain, liver/testis isoform	P15735	YES	YES	NALLRDPYALR	334	0.226434	0.673936	0.0719866	0.154854	0.0514567	0.108733	-0.0704189	0.154135	0.429894	0.0719866
PHKG2	Phosphorylase b kinase gamma catalytic chain, liver/testis isoform	P15735	YES	YES	HLIDNCAFR	348	0.183974	0.653487	-0.694048	1.016	-0.0542211	0.140641	-0.070832	0.231772	0.0903932	-0.694048
PHKG2	Phosphorylase b kinase gamma catalytic chain, liver/testis isoform	P15735	YES	YES	MTLDVGPEDELPDWAAAKEFYQK	1	0.457988	0.577654	0.126242	0.0789762	0.621195	1.01415	-0.868269	0.322207	0.0300562	0.126242
PHKG2	Phosphorylase b kinase gamma catalytic chain, liver/testis isoform	P15735	YES	YES	LSDFGFSCHLEPGEK	169	-0.379378	0.116144	-0.666313	1.22545	-0.504306	0.459175	-0.954902	0.779837	0.545276	-0.666313
PFKFB1	6-phosphofructo-2-kinase/fructose-2,6-bisphosphatase 1	P16118	NO	YES	GSSIPQFTNSPTMVIMVGLPAR	32	-0.324376	0.285711	-0.48191	0.398922	0.267976	0.545967	0.378272	0.848853	0.423091	-0.48191
PRKCA	Protein kinase C alpha type	P17252	YES	YES	GLMTKHPAKR	571	0.862884	1.0401	1.06358	1.518	0.0107002	0.00905981	-1.41217	2.02762	2.24603	1.06358
PRKCA	Protein kinase C alpha type	P17252	YES	YES	ADVFPGNDSTASQDVANR	2	-0.102546	0.782112	0.0653507	0.413961	-0.0350586	0.170474	-0.0317687	0.215994	0.183629	0.0653507
PRKCA	Protein kinase C alpha type	P17252	YES	YES	VMLADRK	353	-0.800476	0.765365	-0.432105	3.84773	-1.19508	3.96358	-2.15221	7.63526	5.56711	-0.432105
PRKCA	Protein kinase C alpha type	P17252	YES	YES	LSVEIWDWDR	240	-0.939241	0.761671	-1.28806	2.35002	-1.85405	2.86215	-1.40125	2.24325	1.9321	-1.28806
PRKCA	Protein kinase C alpha type	P17252	YES	YES	VLALLDKPPFLTQLHSCFQTVDR	390	-1.61881	0.694136	-2.12975	5.1173	-4.51945	6.49625	-4.62744	6.39438	5.88646	-2.12975
PRKCA	Protein kinase C alpha type	P17252	YES	YES	VISPSEDRK	317	-1.22299	0.679776	-0.168393	0.233671	-0.0935275	0.115237	0.333844	0.593853	0.791993	-0.168393
PRKCA	Protein kinase C alpha type	P17252	YES	YES	KQPSNNLDR	325	-0.960866	0.627951	-1.31195	0.92596	-1.30039	0.771838	-1.87435	1.37485	1.33764	-1.31195
PRKCA	Protein kinase C alpha type	P17252	YES	YES	GTEELYAIK	360	-0.591824	0.614782	-0.542459	3.93481	-1.56721	6.34641	-2.64159	6.94641	6.85346	-0.542459
PRKCA	Protein kinase C alpha type	P17252	YES	YES	IADFGMCKEHMMDGVTTR	479	-0.804052	0.60364	-1.04493	1.27375	-1.5339	2.00227	-1.64834	1.57626	1.95849	-1.04493
PRKCA	Protein kinase C alpha type	P17252	YES	YES	EHMMDGVTTR	487	-0.894318	0.59229	-1.63862	1.62738	-2.61476	4.41569	-3.10852	4.6409	5.60914	-1.63862
PRKCA	Protein kinase C alpha type	P17252	YES	YES	KGTEELYAIK	359	-0.702548	0.575429	-0.529582	1.13796	-2.05509	2.66912	-2.96385	3.43834	2.69957	-0.529582
PRKCA	Protein kinase C alpha type	P17252	YES	YES	IDWEKLENR	600	-0.622892	0.522722	-1.8582	1.31182	-2.72017	3.26808	-2.40796	3.37004	2.96021	-1.8582
PRKCA	Protein kinase C alpha type	P17252	YES	YES	VISPSEDR	317	-0.568967	0.502422	0.258009	0.347031	0.505998	0.671239	0.510277	0.963684	0.92012	0.258009
PRKCA	Protein kinase C alpha type	P17252	YES	YES	LGCGPEGERDVR	581	-0.937786	0.404016	-0.0968178	0.171766	-1.18435	2.19676	-3.00173	5.78015	5.76674	-0.0968178
PRKCA	Protein kinase C alpha type	P17252	YES	YES	GLMTKHPAK	571	0.449119	0.401525	0.907746	1.19497	0.75329	0.867903	0.366157	0.368786	0.172437	0.907746
PRKCA	Protein kinase C alpha type	P17252	YES	YES	RIDWEKLENR	599	-0.251874	0.295045	0.103482	0.298043	-0.78954	4.14992	-1.95111	5.10794	5.40381	0.103482
PRKCA	Protein kinase C alpha type	P17252	YES	YES	EIQPPFKPK	609	-0.354617	0.248829	-0.817161	1.20104	-3.41974	5.95491	-4.77118	5.14477	4.92936	-0.817161
PRKCA	Protein kinase C alpha type	P17252	YES	YES	GAENFDKFFTR	622	0.0353106	0.218067	-0.00887819	0.0335969	-0.0317271	0.226503	-0.0878632	0.792395	0.944602	-0.00887819
PRKCA	Protein kinase C alpha type	P17252	YES	YES	KQPSNNLDRVK	325	0.166404	0.179152	0.274816	1.08855	-0.488681	1.23812	-1.03666	3.04744	3.03276	0.274816
PRKACA	cAMP-dependent protein kinase catalytic subunit alpha	P17612	YES	YES	KWESPAQNTAHLDQFER	30	-0.900801	1.04103	-0.486637	2.31893	-0.753194	3.72263	-2.00752	5.81714	4.59743	-0.486637
PRKACA	cAMP-dependent protein kinase catalytic subunit alpha	P17612	YES	YES	AKEDFLK	23	0.446056	0.972599	0.415855	0.823549	0.424199	0.6876	0.488654	1.10568	1.55223	0.415855
PRKACA	cAMP-dependent protein kinase catalytic subunit alpha	P17612	YES	YES	ILQAVNFPFLVK	95	-0.548406	0.925723	-0.41961	1.62494	-0.877716	4.04797	-2.05389	6.03092	6.83949	-0.41961
PRKACA	cAMP-dependent protein kinase catalytic subunit alpha	P17612	YES	YES	IKTLGTGSFGR	47	-0.559409	0.846875	0.0496346	0.0706646	-0.535334	0.935249	-2.72173	1.33618	2.6423	0.0496346
PRKACA	cAMP-dependent protein kinase catalytic subunit alpha	P17612	YES	YES	WFATTDWIAIYQR	297	-0.939334	0.773669	-0.938768	1.23096	-0.8148	2.36804	-1.37228	4.68483	3.72713	-0.938768
PRKACA	cAMP-dependent protein kinase catalytic subunit alpha	P17612	YES	YES	QIEHTLNEKR	85	-0.355244	0.748602	-0.266233	0.382964	0.308588	0.666083	0.379841	0.86237	0.949797	-0.266233
PRKACA	cAMP-dependent protein kinase catalytic subunit alpha	P17612	YES	YES	DLKPENLLIDQQGYIQVTDFGFAKR	167	-1.02953	0.692944	-0.436416	0.415287	-1.18487	1.9414	-2.71894	4.69477	4.52298	-0.436416
PRKACA	cAMP-dependent protein kinase catalytic subunit alpha	P17612	YES	YES	TLGTGSFGR	49	-0.346901	0.606098	-0.404775	1.46967	-0.781206	1.75673	-1.65651	3.85998	1.71246	-0.404775
PRKACA	cAMP-dependent protein kinase catalytic subunit alpha	P17612	YES	YES	FKGPGDTSNFDDYEEEEIR	319	-1.01436	0.56886	0.147726	0.348508	-0.0764864	0.183159	-3.1135	1.8094	2.03515	0.147726
PRKACA	cAMP-dependent protein kinase catalytic subunit alpha	P17612	YES	YES	DNSNLYMVMEYVPGGEMFSHLR	113	-0.524687	0.541117	-0.183507	0.42883	-0.475913	0.697379	-1.93111	3.95507	4.72631	-0.183507
PRKACA	cAMP-dependent protein kinase catalytic subunit alpha	P17612	YES	YES	FPSHFSSDLKDLLR	258	-0.53715	0.451351	0.414453	0.445045	-0.871277	0.68582	-0.383935	0.412938	0.908876	0.414453
PRKACA	cAMP-dependent protein kinase catalytic subunit alpha	P17612	YES	YES	LKQIEHTLNEK	83	-0.953718	0.438827	0.652856	0.269098	0.775825	0.346453	1.1859	0.911133	0.857467	0.652856
PRKACA	cAMP-dependent protein kinase catalytic subunit alpha	P17612	YES	YES	FSEPHAR	139	-0.224559	0.43241	0.00238404	0.00473132	-0.456346	1.33254	-2.08419	1.68335	3.84247	0.00238404
PRKACA	cAMP-dependent protein kinase catalytic subunit alpha	P17612	YES	YES	KVEAPFIPK	310	-0.330704	0.405441	0.251549	0.29528	-0.0819983	0.0807129	-1.49333	1.95694	1.78215	0.251549
PRKACA	cAMP-dependent protein kinase catalytic subunit alpha	P17612	YES	YES	CGKEFSEF	344	0.262759	0.369235	0.442742	0.816366	0.905894	2.14528	0.511615	0.834063	1.51836	0.442742
PRKACA	cAMP-dependent protein kinase catalytic subunit alpha	P17612	YES	YES	LKQIEHTLNEKR	83	0.315394	0.354859	0.305994	0.36289	-0.0647837	0.0604598	0.546976	0.855918	0.838184	0.305994
PRKACA	cAMP-dependent protein kinase catalytic subunit alpha	P17612	YES	YES	RILQAVNFPFLVK	94	0.69488	0.230796	-0.0885854	0.0199281	-2.25659	0.999665	-2.04514	1.23884	1.34531	-0.0885854
PRKACA	cAMP-dependent protein kinase catalytic subunit alpha	P17612	YES	YES	WESPAQNTAHLDQFER	31	-0.334989	0.209275	0.262303	0.25874	-0.596949	0.562724	-2.13374	2.52495	2.81993	0.262303
PRKACA	cAMP-dependent protein kinase catalytic subunit alpha	P17612	YES	YES	VRFPSHFSSDLKDLLR	256	-0.106307	0.155986	0.056365	0.11484	-0.223765	0.694745	-0.690397	1.53259	2.0816	0.056365
PRKACA	cAMP-dependent protein kinase catalytic subunit alpha	P17612	YES	YES	TWTLCGTPEYLAPEIILSK	196	-0.0988018	0.12551	0.104611	0.149138	-0.0380796	0.0511987	-0.567617	1.13715	1.59808	0.104611
PRKACA	cAMP-dependent protein kinase catalytic subunit alpha	P17612	YES	YES	NLLQVDLTKR	272	0.111036	0.0587223	0.131847	0.0893854	-0.39809	0.333293	-1.77082	1.86791	1.95562	0.131847
PRKACA	cAMP-dependent protein kinase catalytic subunit alpha	P17612	YES	YES	KGSEQESVKEFLAK	9	0.0186148	0.0129974	-0.0718131	0.0670277	0.44757	0.590688	-0.00345277	0.00195839	0.23785	-0.0718131
PRKACA	cAMP-dependent protein kinase catalytic subunit alpha	P17612	YES	YES	GSEQESVKEFLAK	10	-0.00732576	0.00669392	0.737376	1.09145	0.611278	0.90332	0.752489	1.12755	2.01516	0.737376
PRKACA	cAMP-dependent protein kinase catalytic subunit alpha	P17612	YES	YES	QIEHTLNEK	85	0.00509039	0.0029664	0.928269	0.895066	0.783177	0.651641	0.943057	0.921035	0.994821	0.928269
PFKL	ATP-dependent 6-phosphofructokinase, liver type	P17858	NO	YES	QANWLSVSNIIQLGGTIIGSAR	67	-3.03224	3.82764	0.147111	0.24452	0.0690057	0.143779	-0.38501	0.928274	0.68321	0.147111
PFKL	ATP-dependent 6-phosphofructokinase, liver type	P17858	NO	YES	MKTDIQR	615	-0.699575	2.95262	0.152161	0.4662	-0.152506	0.114324	-0.11302	0.209084	1.68344	0.152161
PFKL	ATP-dependent 6-phosphofructokinase, liver type	P17858	NO	YES	GRVFANAPDSACVIGLK	697	-1.08688	2.21481	-0.843713	0.939912	-0.90508	1.46363	-0.769985	0.753318	0.109039	-0.843713
PFKL	ATP-dependent 6-phosphofructokinase, liver type	P17858	NO	YES	KAVAFSPVTELKK	715	-1.78997	1.87435	-0.0661691	0.170168	-0.161223	0.34344	0.059303	0.270736	0.768569	-0.0661691
PFKL	ATP-dependent 6-phosphofructokinase, liver type	P17858	NO	YES	CHDYYTTEFLYNLYSSEGK	630	0.172587	1.02507	0.261425	1.5687	0.271942	1.57609	0.0511078	0.152113	0.897783	0.261425
PFKL	ATP-dependent 6-phosphofructokinase, liver type	P17858	NO	YES	NGKPISSSYVK	270	0.207283	0.953842	0.00771255	0.0211604	0.0346608	0.0991825	-0.0731959	0.288654	0.487057	0.00771255
PFKL	ATP-dependent 6-phosphofructokinase, liver type	P17858	NO	YES	TLSMDKGF	773	0.106489	0.811171	0.0549445	0.284315	0.0845483	0.82021	0.1175	1.10974	0.561851	0.0549445
PFKL	ATP-dependent 6-phosphofructokinase, liver type	P17858	NO	YES	LPLMECVQMTK	346	0.11664	0.798498	0.0374142	0.163023	0.108108	1.14697	0.0985752	0.930585	0.475246	0.0374142
PFKL	ATP-dependent 6-phosphofructokinase, liver type	P17858	NO	YES	VNVEHMTEK	606	0.151038	0.693447	0.088538	0.325933	0.0892463	0.350749	0.111162	0.44362	0.0794525	0.088538
PFKL	ATP-dependent 6-phosphofructokinase, liver type	P17858	NO	YES	LLAHQKPPK	387	0.532044	0.672334	0.29516	0.334624	-0.387053	0.466657	0.212246	0.218827	0.0843434	0.29516
PFKL	ATP-dependent 6-phosphofructokinase, liver type	P17858	NO	YES	VFLIYEGYEGLVEGGENIK	48	0.132241	0.651729	0.0783514	0.257381	0.0806559	0.241219	-0.122305	0.471284	0.305235	0.0783514
PFKL	ATP-dependent 6-phosphofructokinase, liver type	P17858	NO	YES	TFVLEVMGR	202	0.10745	0.612674	0.0783789	0.463223	0.11876	0.80618	0.0709391	0.514026	0.0935355	0.0783789
PFKL	ATP-dependent 6-phosphofructokinase, liver type	P17858	NO	YES	AAAYNLVQHGITNLCVIGGDGSLTGANIFR	100	-0.245045	0.591455	-0.0311174	0.0949752	-0.0582265	0.213382	-0.131152	0.592767	0.7437	-0.0311174
PFKL	ATP-dependent 6-phosphofructokinase, liver type	P17858	NO	YES	MGMEAVMALLEATPDTPACVVTLSGNQSVR	316	-0.384324	0.575217	0.135036	0.183238	-0.120835	0.25625	-0.0937596	0.166214	0.249945	0.135036
PFKL	ATP-dependent 6-phosphofructokinase, liver type	P17858	NO	YES	GGTPSAFDR	302	-0.122425	0.540648	-0.0174668	0.0891059	-0.0393382	0.174086	0.0072886	0.044945	0.221867	-0.0174668
PFKL	ATP-dependent 6-phosphofructokinase, liver type	P17858	NO	YES	TLPKGQLESIVENIR	471	-0.0999501	0.510889	-0.0291996	0.126743	0.0161519	0.0521238	-0.0907227	0.565379	0.705734	-0.0291996
PFKL	ATP-dependent 6-phosphofructokinase, liver type	P17858	NO	YES	GGSMLGTKR	462	-0.275507	0.500333	-0.0199167	0.0259426	0.0785798	0.137812	0.136119	0.261679	0.336286	-0.0199167
PFKL	ATP-dependent 6-phosphofructokinase, liver type	P17858	NO	YES	KAVAFSPVTELK	715	-0.666388	0.424234	0.0235799	0.0141053	-0.390592	0.34556	-0.229945	0.173774	0.676036	0.0235799
PFKL	ATP-dependent 6-phosphofructokinase, liver type	P17858	NO	YES	TGISHGHTVYVVHDGFEGLAK	424	-0.10602	0.419798	-0.0677396	0.20646	-0.273546	1.20217	-0.300916	1.08405	1.97918	-0.0677396
PFKL	ATP-dependent 6-phosphofructokinase, liver type	P17858	NO	YES	AAVDLEK	2	0.0602807	0.406043	0.0972766	0.549351	0.0969975	0.868091	0.0820456	0.858061	0.533399	0.0972766
PFKL	ATP-dependent 6-phosphofructokinase, liver type	P17858	NO	YES	DTDFEHR	728	-0.304212	0.403983	0.174408	0.236615	0.275528	0.437762	0.153632	0.199362	0.133659	0.174408
PFKL	ATP-dependent 6-phosphofructokinase, liver type	P17858	NO	YES	LNIIIIAEGAIDRNGKPISSSYVK	257	-0.179587	0.387485	0.0518555	0.0803617	-0.115885	0.253757	-0.278406	0.71051	0.237565	0.0518555
PFKL	ATP-dependent 6-phosphofructokinase, liver type	P17858	NO	YES	ISMAAYVSGELEHVTRR	756	0.158106	0.369664	-0.0177031	0.0356918	0.129533	0.339095	-0.0292794	0.0543362	0.0214916	-0.0177031
PFKL	ATP-dependent 6-phosphofructokinase, liver type	P17858	NO	YES	LLAHQKPPKEK	387	0.154856	0.365244	0.0495749	0.118279	-0.140781	0.427783	-0.0268915	0.0662299	0.337307	0.0495749
PFKL	ATP-dependent 6-phosphofructokinase, liver type	P17858	NO	YES	AIGVLTSGGDAQGMNAAVR	17	0.0556515	0.35092	-0.0336617	0.173921	0.0131349	0.0721889	-0.0120673	0.0577367	0.152468	-0.0336617
PFKL	ATP-dependent 6-phosphofructokinase, liver type	P17858	NO	YES	FDEATQLR	367	0.0728346	0.337505	0.0642837	0.279061	-0.00231783	0.00929287	0.0159494	0.0833827	0.0487554	0.0642837
PFKL	ATP-dependent 6-phosphofructokinase, liver type	P17858	NO	YES	TNVLGHLQQGGAPTPFDR	655	-0.0663829	0.327236	0.0749269	0.270513	-0.0451895	0.223212	-0.0705834	0.400151	0.553081	0.0749269
PFKL	ATP-dependent 6-phosphofructokinase, liver type	P17858	NO	YES	AVAFSPVTELKK	716	0.0645782	0.320147	0.00806151	0.0338991	0.00501299	0.0245983	0.00240358	0.0111134	0.137572	0.00806151
PFKL	ATP-dependent 6-phosphofructokinase, liver type	P17858	NO	YES	RFDEATQLR	366	0.0665603	0.294844	-0.0143107	0.0573242	0.0109759	0.0479992	0.0354622	0.18896	0.159069	-0.0143107
PFKL	ATP-dependent 6-phosphofructokinase, liver type	P17858	NO	YES	RTLSMDK	772	0.881135	0.294049	1.46288	0.561951	1.73949	0.693365	0.185591	0.037581	0.49127	1.46288
PFKL	ATP-dependent 6-phosphofructokinase, liver type	P17858	NO	YES	GQLESIVENIR	475	0.0573644	0.265351	0.0636762	0.338333	0.0331714	0.213251	0.0463386	0.260568	0.188101	0.0636762
PFKL	ATP-dependent 6-phosphofructokinase, liver type	P17858	NO	YES	TNVLGHLQQGGAPTPFDRNYGTK	655	0.0589156	0.25351	0.0969847	0.449247	-0.00910642	0.0279748	-0.121173	0.624448	0.297266	0.0969847
PFKL	ATP-dependent 6-phosphofructokinase, liver type	P17858	NO	YES	VTVLGHVQR	293	0.118787	0.234341	0.156811	0.482482	0.0903353	0.289321	0.0889439	0.290345	0.164616	0.156811
PFKL	ATP-dependent 6-phosphofructokinase, liver type	P17858	NO	YES	EKSNFSLAILNVGAPAAGMNAAVR	396	0.0619311	0.225526	-0.133964	0.279726	-0.190611	0.924284	-0.192607	0.778333	0.211377	-0.133964
PFKL	ATP-dependent 6-phosphofructokinase, liver type	P17858	NO	YES	EQWWLSLR	738	0.0677863	0.217495	-0.0232749	0.0775659	0.115074	0.492934	0.0746116	0.331569	0.984309	-0.0232749
PFKL	ATP-dependent 6-phosphofructokinase, liver type	P17858	NO	YES	ISMAAYVSGELEHVTR	756	0.0514673	0.216242	0.0632959	0.241136	-0.0555937	0.205924	0.0408292	0.183729	0.0752393	0.0632959
PFKL	ATP-dependent 6-phosphofructokinase, liver type	P17858	NO	YES	NEKCHDYYTTEFLYNLYSSEGK	627	0.132783	0.205949	0.161479	0.294217	-0.0156271	0.0199783	-0.459053	0.700336	0.445907	0.161479
PFKL	ATP-dependent 6-phosphofructokinase, liver type	P17858	NO	YES	MGIYVGAK	40	0.0585339	0.191415	0.116706	0.477389	0.141149	0.553306	0.0891788	0.354106	0.0140516	0.116706
PFKL	ATP-dependent 6-phosphofructokinase, liver type	P17858	NO	YES	CKAFTTR	89	-0.492179	0.169757	0.662893	0.542178	0.504241	0.361556	-0.419767	0.165948	0.593933	0.662893
PFKL	ATP-dependent 6-phosphofructokinase, liver type	P17858	NO	YES	VFANAPDSACVIGLK	699	-0.0383106	0.151388	0.0117194	0.0465945	0.0175757	0.073704	0.0076167	0.0272439	0.0876657	0.0117194
PFKL	ATP-dependent 6-phosphofructokinase, liver type	P17858	NO	YES	TYSHLNIAGLVGSIDNDFCGTDMTIGTDSALHR	152	0.109057	0.149287	-0.288485	0.411456	-0.686875	0.878731	-0.57853	0.96683	0.707939	-0.288485
PFKL	ATP-dependent 6-phosphofructokinase, liver type	P17858	NO	YES	IMEVIDAITTTAQSHQR	185	0.0208712	0.140547	-0.0956474	0.602568	-0.0661669	0.528984	-0.107523	1.1339	0.595867	-0.0956474
PFKL	ATP-dependent 6-phosphofructokinase, liver type	P17858	NO	YES	GGSFENNWNIYK	375	0.0281118	0.126507	-0.0362431	0.144962	0.0852196	0.658476	0.0537447	0.383452	0.765653	-0.0362431
PFKL	ATP-dependent 6-phosphofructokinase, liver type	P17858	NO	YES	GQVQEVGWHDVAGWLGR	445	-0.0249362	0.120552	-0.0567796	0.302742	0.0761813	0.463546	0.0459068	0.320328	0.168855	-0.0567796
PFKL	ATP-dependent 6-phosphofructokinase, liver type	P17858	NO	YES	VFANAPDSACVIGLKK	699	-0.0312515	0.0858176	-0.0375561	0.0909224	-0.163817	0.654965	-0.131511	0.488182	0.56597	-0.0375561
PFKL	ATP-dependent 6-phosphofructokinase, liver type	P17858	NO	YES	LNIIIIAEGAIDR	257	-0.0388276	0.0854283	0.114655	0.274058	-0.12055	0.464349	-0.0871054	0.264939	0.567767	0.114655
PFKL	ATP-dependent 6-phosphofructokinase, liver type	P17858	NO	YES	AMLWLSEK	682	-0.0182896	0.0590918	-0.0677081	0.255484	0.032333	0.119632	0.0537513	0.239055	0.189276	-0.0677081
PFKL	ATP-dependent 6-phosphofructokinase, liver type	P17858	NO	YES	ASGAGKAIGVLTSGGDAQGMNAAVR	11	-0.065331	0.0547056	-0.100112	0.06675	0.435719	0.696622	0.280307	0.388762	0.0626262	-0.100112
PFKL	ATP-dependent 6-phosphofructokinase, liver type	P17858	NO	YES	AVAFSPVTELK	716	0.0625731	0.0471715	0.0185787	0.0182272	0.00941693	0.0089403	-0.362631	0.493018	0.738531	0.0185787
PFKL	ATP-dependent 6-phosphofructokinase, liver type	P17858	NO	YES	SEWGSLLEELVAEGK	130	-0.0105182	0.0381774	0.00311928	0.0125826	0.0624704	0.41072	-0.0260582	0.137201	0.367174	0.00311928
PFKL	ATP-dependent 6-phosphofructokinase, liver type	P17858	NO	YES	SNFSLAILNVGAPAAGMNAAVR	398	0.00903859	0.0341524	0.0260506	0.083818	-0.0336591	0.1473	-0.0699106	0.354156	0.862838	0.0260506
PFKL	ATP-dependent 6-phosphofructokinase, liver type	P17858	NO	YES	AAVDLEKLR	2	0.00436695	0.0312257	0.0625469	0.486492	0.104182	1.5726	0.0585948	0.498978	1.3519	0.0625469
PFKL	ATP-dependent 6-phosphofructokinase, liver type	P17858	NO	YES	MPREQWWLSLR	735	-0.0544392	0.025625	0.187951	0.103847	0.356021	0.202366	0.164839	0.0891908	0.22353	0.187951
PFKL	ATP-dependent 6-phosphofructokinase, liver type	P17858	NO	YES	SEWGSLLEELVAEGKISETTAR	130	0.0333583	0.0155243	0.639537	0.401533	0.442766	0.285151	0.475689	0.321449	0.186151	0.639537
PFKL	ATP-dependent 6-phosphofructokinase, liver type	P17858	NO	YES	AMDDKRFDEATQLR	361	0.007526	0.0154885	0.112495	0.283911	0.0691389	0.202365	-0.149105	0.424946	0.27731	0.112495
PFKL	ATP-dependent 6-phosphofructokinase, liver type	P17858	NO	YES	AMLWLSEKLR	682	-0.0106882	0.0144087	0.0649901	0.0662119	0.213938	0.399503	0.0562677	0.0844327	0.347356	0.0649901
PFKL	ATP-dependent 6-phosphofructokinase, liver type	P17858	NO	YES	RAAAYNLVQHGITNLCVIGGDGSLTGANIFR	99	0.00248337	0.00665911	-0.100162	0.340668	-0.0130791	0.0381331	-0.227198	1.05985	1.09365	-0.100162
HK1	Hexokinase-1	P19367	NO	YES	IDEAILITWTKR	163	-1.57772	0.741686	-0.800582	0.542409	-0.89394	0.457713	-1.03945	1.08418	0.303923	-0.800582
HK1	Hexokinase-1	P19367	NO	YES	LSDETLIDIMTR	31	0.214519	0.461235	0.0205058	0.0328907	0.323236	0.955204	-0.0983075	0.117997	0.0275125	0.0205058
HK1	Hexokinase-1	P19367	NO	YES	GDFIALDLGGSSFR	78	0.651007	0.377353	0.936031	0.598599	0.84726	0.518856	0.718436	0.417023	0.398478	0.936031
HK1	Hexokinase-1	P19367	NO	YES	FLLSESGSGK	442	-0.683443	0.308786	0.282635	0.56538	0.356007	1.2262	-0.0432029	0.0776665	0.317152	0.282635
HK1	Hexokinase-1	P19367	NO	YES	SANLVAATLGAILNR	382	0.136725	0.279048	0.0333339	0.0507128	0.204077	0.62141	0.160576	0.468485	0.295179	0.0333339
HK1	Hexokinase-1	P19367	NO	YES	LVPDSDVR	434	0.60477	0.251857	0.229027	0.0918144	0.867216	0.49159	1.16926	0.543078	0.616386	0.229027
HK1	Hexokinase-1	P19367	NO	YES	GKFNTSDVSAIEK	332	-0.233575	0.227365	-0.438868	0.286693	-0.470641	0.483002	0.136198	0.138417	0.0420879	-0.438868
HK1	Hexokinase-1	P19367	NO	YES	RTPDGTENGDFLALDLGGTNFR	518	0.223226	0.142855	0.926033	0.941315	0.38314	0.281806	-0.176949	0.115085	0.0952475	0.926033
HK1	Hexokinase-1	P19367	NO	YES	MVSGMYLGELVR	296	-0.097279	0.103198	-0.236244	0.271479	0.225221	0.290191	0.368689	0.532063	0.373451	-0.236244
HK1	Hexokinase-1	P19367	NO	YES	ITPELLTR	324	-0.0630534	0.0724487	0.0646352	0.194122	0.114065	0.433048	0.0517151	0.141227	0.536626	0.0646352
HK1	Hexokinase-1	P19367	NO	YES	TTVGVDGSLYK	408	0.00833001	0.00890155	-1.07334	0.858858	0.0314541	0.0530286	0.0652865	0.12174	2.90746	-1.07334
EIF2AK2	Interferon-induced, double-stranded RNA-activated protein kinase	P19525	YES	YES	FGMDFKEIELIGSGGFGQVFK	263	1.2408	1.61455	-0.142211	0.12315	2.01194	3.12507	2.28431	3.58618	3.30796	-0.142211
EIF2AK2	Interferon-induced, double-stranded RNA-activated protein kinase	P19525	YES	YES	GVDYIHSKK	401	-1.14938	1.536	0.194635	0.344967	-0.54005	1.35377	-1.00016	1.7625	2.23206	0.194635
EIF2AK2	Interferon-induced, double-stranded RNA-activated protein kinase	P19525	YES	YES	EYSIGTGSTK	141	-0.431515	1.01054	-0.0873775	0.294637	0.168252	0.504653	0.103361	0.369232	0.200598	-0.0873775
EIF2AK2	Interferon-induced, double-stranded RNA-activated protein kinase	P19525	YES	YES	KAVSPLLLTTTNSSEGLSMGNYIGLINR	80	0.744678	0.842905	-1.86173	1.27578	-0.576618	0.619399	-0.164123	0.13944	0.762391	-1.86173
EIF2AK2	Interferon-induced, double-stranded RNA-activated protein kinase	P19525	YES	YES	EFPEGEGR	51	1.16635	0.730927	0.317072	0.115686	0.20933	0.0717718	0.669853	0.358582	1.06002	0.317072
EIF2AK2	Interferon-induced, double-stranded RNA-activated protein kinase	P19525	YES	YES	AVSPLLLTTTNSSEGLSMGNYIGLINR	81	0.307525	0.651276	0.0645822	0.111321	-0.13164	0.22226	0.116997	0.222698	0.132554	0.0645822
EIF2AK2	Interferon-induced, double-stranded RNA-activated protein kinase	P19525	YES	YES	KPEDRPNTSEILR	522	-0.28968	0.626163	0.0235958	0.076482	-0.230167	1.21034	-1.03537	4.23326	5.3452	0.0235958
EIF2AK2	Interferon-induced, double-stranded RNA-activated protein kinase	P19525	YES	YES	LAVEILNK	70	0.0867279	0.55552	0.0838124	0.461783	0.0699812	0.458788	0.0637548	0.408628	0.126742	0.0838124
EIF2AK2	Interferon-induced, double-stranded RNA-activated protein kinase	P19525	YES	YES	YMSPEQISSQDYGK	454	-0.8478	0.526822	-0.0708659	0.17558	-0.627847	2.74845	-2.30709	4.39401	3.59043	-0.0708659
EIF2AK2	Interferon-induced, double-stranded RNA-activated protein kinase	P19525	YES	YES	LDKVLALELFEQITK	386	-0.237118	0.383107	0.0124755	0.0210871	-0.0735915	0.140222	-0.532478	1.53117	2.39831	0.0124755
EIF2AK2	Interferon-induced, double-stranded RNA-activated protein kinase	P19525	YES	YES	TLTVWKK	535	0.212226	0.327283	0.093259	0.151279	0.38433	0.621415	-0.442394	0.752404	1.62511	0.093259
EIF2AK2	Interferon-induced, double-stranded RNA-activated protein kinase	P19525	YES	YES	IGDFGLVTSLK	430	-0.139249	0.318751	0.0476142	0.207865	-0.243127	2.21765	-0.90168	5.78414	6.77502	0.0476142
EIF2AK2	Interferon-induced, double-stranded RNA-activated protein kinase	P19525	YES	YES	VLALELFEQITK	389	-0.154333	0.311558	0.105616	0.519953	-0.0502851	0.347276	-0.757411	5.55963	4.71709	0.105616
EIF2AK2	Interferon-induced, double-stranded RNA-activated protein kinase	P19525	YES	YES	GTLEQWIEKR	372	-0.379907	0.30745	-0.354506	0.407706	-1.50107	2.07914	-2.62536	3.3162	2.87265	-0.354506
EIF2AK2	Interferon-induced, double-stranded RNA-activated protein kinase	P19525	YES	YES	FDLPDMK	247	0.056741	0.277208	0.0250651	0.0836846	0.154687	0.912833	0.152568	1.066	0.969904	0.0250651
EIF2AK2	Interferon-induced, double-stranded RNA-activated protein kinase	P19525	YES	YES	CLFIQMEFCDK	361	-0.269973	0.276841	0.142702	0.187129	-1.17087	1.76104	-2.05374	3.41867	2.72096	0.142702
EIF2AK2	Interferon-induced, double-stranded RNA-activated protein kinase	P19525	YES	YES	YQELPNSGPPHDRR	27	0.131976	0.267705	-0.0101251	0.0211758	0.116032	0.317841	0.0306861	0.0759073	0.223641	-0.0101251
EIF2AK2	Interferon-induced, double-stranded RNA-activated protein kinase	P19525	YES	YES	AGDLSAGFFMEELNTYR	2	0.0870778	0.216489	0.0526765	0.116957	0.140177	0.49261	0.156906	0.610793	0.187686	0.0526765
EIF2AK2	Interferon-induced, double-stranded RNA-activated protein kinase	P19525	YES	YES	LTVNYEQCASGVHGPEGFHYK	114	-0.0914646	0.19498	0.0367194	0.0742998	-0.116627	0.306488	-0.14918	0.325419	0.453418	0.0367194
EIF2AK2	Interferon-induced, double-stranded RNA-activated protein kinase	P19525	YES	YES	RFTFQVIIDGR	40	-0.127549	0.180234	0.205818	0.520982	0.0616695	0.142712	-0.295337	0.485149	0.307911	0.205818
EIF2AK2	Interferon-induced, double-stranded RNA-activated protein kinase	P19525	YES	YES	IGDFGLVTSLKNDGKR	430	-0.0542648	0.175681	-0.0171993	0.0609635	0.137374	0.577636	-0.363205	1.5989	2.99129	-0.0171993
EIF2AK2	Interferon-induced, double-stranded RNA-activated protein kinase	P19525	YES	YES	FTFQVIIDGR	41	-0.104822	0.154443	0.0698583	0.152536	-0.0941438	0.241431	-0.0740276	0.17382	0.247681	0.0698583
EIF2AK2	Interferon-induced, double-stranded RNA-activated protein kinase	P19525	YES	YES	DLKPSNIFLVDTK	414	-0.0479841	0.127212	0.122521	0.844009	0.0287205	0.199724	-0.659626	5.11247	5.53583	0.122521
EIF2AK2	Interferon-induced, double-stranded RNA-activated protein kinase	P19525	YES	YES	LAYLQILSEETSVK	160	0.0228153	0.124745	0.00559812	0.0273666	0.00627466	0.0377986	0.0412283	0.253056	0.0772499	0.00559812
EIF2AK2	Interferon-induced, double-stranded RNA-activated protein kinase	P19525	YES	YES	DGIISDIFDKK	500	0.037526	0.101943	0.0166056	0.0463686	-0.132939	0.404312	-0.588145	1.57799	2.631	0.0166056
EIF2AK2	Interferon-induced, double-stranded RNA-activated protein kinase	P19525	YES	YES	EIELIGSGGFGQVFK	269	-0.042503	0.0757529	0.00251944	0.00606209	-0.0564422	0.237273	-0.710249	4.15273	4.96456	0.00251944
EIF2AK2	Interferon-induced, double-stranded RNA-activated protein kinase	P19525	YES	YES	YQELPNSGPPHDR	27	0.0432683	0.0669158	0.11731	0.252048	0.222164	0.542163	0.0421334	0.0839314	0.405355	0.11731
EIF2AK2	Interferon-induced, double-stranded RNA-activated protein kinase	P19525	YES	YES	LAVEILNKEK	70	0.0230017	0.0295116	0.0355217	0.051121	0.114182	0.218497	0.141387	0.279663	0.111052	0.0355217
EIF2AK2	Interferon-induced, double-stranded RNA-activated protein kinase	P19525	YES	YES	EYSIGTGSTKQEAK	141	0.00747866	0.00880871	0.0747294	0.0970305	0.002276	0.00303969	-0.0339862	0.0498165	0.173284	0.0747294
CSNK2A2	Casein kinase II subunit alpha'	P19784	YES	YES	VLGTEELYGYLKK	249	-0.387035	1.19381	-0.401228	1.42478	-1.23198	4.08654	-1.20509	4.40181	3.49231	-0.401228
CSNK2A2	Casein kinase II subunit alpha'	P19784	YES	YES	QLYQILTDFDIR	124	-1.06274	0.843796	-0.374804	0.702065	-1.57785	3.39009	-3.64143	4.18098	4.04982	-0.374804
CSNK2A2	Casein kinase II subunit alpha'	P19784	YES	YES	FYMYELLK	136	-1.33469	0.759256	-0.76398	0.552421	-3.47042	3.52186	-4.34049	4.1811	4.48274	-0.76398
CSNK2A2	Casein kinase II subunit alpha'	P19784	YES	YES	REPFFHGQDNYDQLVR	230	-0.943004	0.731913	-0.800902	1.69664	-1.67483	1.34063	-2.55639	2.48661	1.82312	-0.800902
CSNK2A2	Casein kinase II subunit alpha'	P19784	YES	YES	LIDWGLAEFYHPAQEYNVR	174	-0.851284	0.728943	-0.512197	2.51014	-1.69978	6.67847	-2.77248	4.44415	5.2655	-0.512197
CSNK2A2	Casein kinase II subunit alpha'	P19784	YES	YES	HLVSPEALDLLDK	292	-0.743012	0.625504	-0.753281	0.868856	-3.54453	3.97091	-2.568	4.19059	4.05929	-0.753281
CSNK2A2	Casein kinase II subunit alpha'	P19784	YES	YES	VLGTEELYGYLK	249	-0.239524	0.625051	-0.284064	1.49354	-0.93273	4.55025	-0.916216	5.95144	4.85888	-0.284064
CSNK2A2	Casein kinase II subunit alpha'	P19784	YES	YES	EQSQPCADNAVLSSGLTAAR	331	-1.04442	0.616942	-0.699592	1.19353	-2.52225	2.25644	-3.0161	5.23476	2.752	-0.699592
CSNK2A2	Casein kinase II subunit alpha'	P19784	YES	YES	WENFIHSENR	282	-1.00158	0.602389	-1.09507	0.841097	-2.7038	2.89012	-2.29149	2.08541	2.22419	-1.09507
CSNK2A2	Casein kinase II subunit alpha'	P19784	YES	YES	KYHIDLDPHFNDILGQHSR	261	-0.358661	0.547027	-0.260195	0.352482	-1.38922	4.83547	-1.57247	3.31716	4.36138	-0.260195
CSNK2A2	Casein kinase II subunit alpha'	P19784	YES	YES	TPALVFEYINNTDFK	109	-0.716233	0.532199	-0.370167	0.262336	-1.84452	1.84156	-1.80824	1.84903	1.69027	-0.370167
CSNK2A2	Casein kinase II subunit alpha'	P19784	YES	YES	HLVSPEALDLLDKLLR	292	-0.71425	0.490767	-0.322191	0.716243	-1.88607	5.24898	-2.84554	5.98634	5.83028	-0.322191
CSNK2A2	Casein kinase II subunit alpha'	P19784	YES	YES	YHIDLDPHFNDILGQHSR	262	-0.276534	0.475046	-0.256037	0.690861	-1.02516	2.5949	-1.01801	3.95256	3.46961	-0.256037
CSNK2A2	Casein kinase II subunit alpha'	P19784	YES	YES	EAMEHPYFYPVVK	318	-0.537818	0.310192	-0.49904	1.32798	-2.61972	3.75963	-3.14724	5.83536	6.07965	-0.49904
CSNK2A2	Casein kinase II subunit alpha'	P19784	YES	YES	EPFFHGQDNYDQLVR	231	-0.250399	0.170487	-0.674377	0.831568	-2.89491	3.12963	-2.58828	3.43086	3.86922	-0.674377
CSNK2A2	Casein kinase II subunit alpha'	P19784	YES	YES	GKYSEVFEAINITNNER	49	0.234322	0.141427	0.605476	0.767676	-0.983935	0.966154	-2.24758	3.09006	1.75701	0.605476
CSNK2A2	Casein kinase II subunit alpha'	P19784	YES	YES	ARVYAEVNSLR	10	0.0369386	0.0366323	0.380202	0.625246	0.446512	0.736594	0.382803	0.610277	0.741938	0.380202
CSNK2A2	Casein kinase II subunit alpha'	P19784	YES	YES	VYAEVNSLR	12	0.00176949	0.0103256	0.071423	0.33299	0.0835062	0.61524	0.0123406	0.0818948	0.162806	0.071423
CDK11B	Cyclin-dependent kinase 11B	P21127	YES	YES	GDEKDSWK	2	-1.35539	1.8924	-0.513646	0.440824	0.666055	0.917983	-0.795108	0.455926	0.451419	-0.513646
CDK11B	Cyclin-dependent kinase 11B	P21127	YES	YES	IWPGYSELPAVKK	661	-0.901132	1.11876	-0.456641	0.403691	-0.0432881	0.0359842	-0.605204	0.423042	1.01716	-0.456641
CDK11B	Cyclin-dependent kinase 11B	P21127	YES	YES	ETGFHLTTTNQGASAAGPGFSLKF	772	1.70899	0.761811	0.595971	0.255198	0.385648	0.129806	1.37777	1.02143	0.495263	0.595971
CDK11B	Cyclin-dependent kinase 11B	P21127	YES	YES	TMREDYSDKVK	217	0.456687	0.707211	0.27635	0.379516	0.22937	0.309663	0.223874	0.299437	0.196913	0.27635
CDK11B	Cyclin-dependent kinase 11B	P21127	YES	YES	TDEIVALKR	460	0.171021	0.673513	0.113968	0.434294	0.00926862	0.0271894	-0.0808796	0.356991	0.968112	0.113968
CDK11B	Cyclin-dependent kinase 11B	P21127	YES	YES	RDSLEEGELR	45	1.43819	0.630815	0.0478817	0.0158033	0.000120799	3.55919e-05	-0.0221855	0.00747382	0.0212978	0.0478817
CDK11B	Cyclin-dependent kinase 11B	P21127	YES	YES	DSLEEGELR	46	0.201437	0.629684	-0.0733194	0.13509	-0.0489818	0.088058	-0.0581451	0.114623	0.164294	-0.0733194
CDK11B	Cyclin-dependent kinase 11B	P21127	YES	YES	QELPKYLPALQGCR	420	-0.0902827	0.390223	-0.0177068	0.0625706	0.0362358	0.134553	-0.0340469	0.127217	0.985914	-0.0177068
CDK11B	Cyclin-dependent kinase 11B	P21127	YES	YES	HLHDNWILHR	552	-0.511959	0.373443	-0.729418	0.392513	-1.06217	0.840475	-0.382984	0.374961	1.20265	-0.729418
CDK11B	Cyclin-dependent kinase 11B	P21127	YES	YES	FLTYFPGR	703	-0.0754844	0.324944	-0.20293	1.09427	-0.205326	0.784709	-0.329934	1.71083	2.29923	-0.20293
CDK11B	Cyclin-dependent kinase 11B	P21127	YES	YES	SVEEFQCLNR	434	-0.0756101	0.309038	0.0610884	0.320418	0.0276429	0.133847	-0.104151	0.645468	1.72049	0.0610884
CDK11B	Cyclin-dependent kinase 11B	P21127	YES	YES	KMTFSEHPYNNLR	673	-0.191588	0.248756	-0.204534	0.296912	-0.207723	0.298492	-0.487829	0.931857	0.745153	-0.204534
CDK11B	Cyclin-dependent kinase 11B	P21127	YES	YES	TLMIQLLR	541	0.0517005	0.206515	0.0823651	0.396882	-0.188883	0.404223	-0.522891	0.690924	0.903059	0.0823651
CDK11B	Cyclin-dependent kinase 11B	P21127	YES	YES	EINTILK	485	-0.0686481	0.203367	0.060661	0.176902	0.0579747	0.179762	-0.0647711	0.190259	0.390289	0.060661
CDK11B	Cyclin-dependent kinase 11B	P21127	YES	YES	DLLSDLQDISDSERK	274	-0.171815	0.190713	-0.0118312	0.00999785	-0.221445	0.227671	0.0387807	0.0335495	0.162843	-0.0118312
CDK11B	Cyclin-dependent kinase 11B	P21127	YES	YES	MTFSEHPYNNLR	674	-0.0451623	0.179009	-0.119266	0.585117	-0.0996396	0.4361	-0.121202	0.651612	1.66318	-0.119266
CDK11B	Cyclin-dependent kinase 11B	P21127	YES	YES	ISAEDGLKHEYFR	712	-0.0678375	0.17877	-0.0562541	0.122065	-0.170289	0.508759	-0.39393	1.48061	1.89459	-0.0562541
CDK11B	Cyclin-dependent kinase 11B	P21127	YES	YES	EIVVGSNMDK	502	-0.109672	0.164381	0.352613	0.8466	0.184026	0.371396	0.118287	0.123822	0.406614	0.352613
CDK11B	Cyclin-dependent kinase 11B	P21127	YES	YES	APELLLGAK	605	-0.0364585	0.156785	-0.124323	0.603902	-0.133798	0.703687	-0.179594	1.05314	2.17021	-0.124323
CDK11B	Cyclin-dependent kinase 11B	P21127	YES	YES	RISAEDGLKHEYFR	711	0.479988	0.155785	1.33204	0.656264	1.43981	0.700545	1.24749	0.592608	0.542513	1.33204
CDK11B	Cyclin-dependent kinase 11B	P21127	YES	YES	IEEGTYGVVYR	444	-0.0407666	0.134541	0.0894669	0.517766	0.0666281	0.448695	-0.0777199	0.64234	1.28228	0.0894669
CDK11B	Cyclin-dependent kinase 11B	P21127	YES	YES	DRLEQLER	166	0.0325718	0.126725	0.0445202	0.153594	0.18038	1.14412	0.101863	0.571652	0.412985	0.0445202
CDK11B	Cyclin-dependent kinase 11B	P21127	YES	YES	IWPGYSELPAVK	661	-0.0418811	0.121001	-0.0438976	0.126448	-0.149241	0.629106	-0.303218	1.14187	1.27207	-0.0438976
CDK11B	Cyclin-dependent kinase 11B	P21127	YES	YES	TLDEILQEK	12	0.0259281	0.119249	0.0255892	0.103697	0.0800895	0.459815	0.049515	0.24101	0.354852	0.0255892
CDK11B	Cyclin-dependent kinase 11B	P21127	YES	YES	TSNLLLSHAGILK	565	-0.0333496	0.118762	0.0765654	0.286819	-0.00811076	0.0355266	-0.166174	1.00589	1.09049	0.0765654
CDK11B	Cyclin-dependent kinase 11B	P21127	YES	YES	SVEEFQCLNRIEEGTYGVVYR	434	0.0401121	0.109185	-0.017667	0.0443018	-0.00411521	0.0119317	-0.219175	0.903754	0.694748	-0.017667
CDK11B	Cyclin-dependent kinase 11B	P21127	YES	YES	VGDFGLAR	578	-0.0226779	0.106486	0.0312427	0.182783	-0.018296	0.100265	-0.0635051	0.33864	1.41868	0.0312427
CDK11B	Cyclin-dependent kinase 11B	P21127	YES	YES	EKEGFPITSLR	474	-0.0189671	0.0688772	-0.1454	0.713134	-0.0923283	0.451474	-0.178034	1.07786	1.50087	-0.1454
CDK11B	Cyclin-dependent kinase 11B	P21127	YES	YES	EGFPITSLR	476	0.00939276	0.051953	0.0220011	0.085121	-0.0234237	0.189589	-0.0892927	0.836938	2.21413	0.0220011
CDK11B	Cyclin-dependent kinase 11B	P21127	YES	YES	AYTPVVVTLWYR	593	0.0279358	0.0505241	0.176812	0.476242	0.124996	0.252071	0.105207	0.239291	0.804919	0.176812
CDK11B	Cyclin-dependent kinase 11B	P21127	YES	YES	EIVVGSNMDKIYIVMNYVEHDLK	502	0.0418963	0.0404694	0.198785	0.173273	-0.566961	0.680999	-1.03451	1.39889	0.514601	0.198785
CDK11B	Cyclin-dependent kinase 11B	P21127	YES	YES	IYIVMNYVEHDLK	512	0.0187229	0.0298143	-0.0382206	0.0624694	-0.0538792	0.0957921	-0.447738	0.475189	0.482573	-0.0382206
CDK11B	Cyclin-dependent kinase 11B	P21127	YES	YES	ETPLPIDPSMFPTWPAK	725	0.00926092	0.0264151	-0.105003	0.3532	-0.000867649	0.00260871	0.0701149	0.263076	0.244029	-0.105003
CDK11B	Cyclin-dependent kinase 11B	P21127	YES	YES	FGALLSDQGFDLMNK	688	0.00843696	0.0249394	0.00707702	0.0247104	-0.0376555	0.139777	-0.0635765	0.250834	0.258831	0.00707702
CDK11B	Cyclin-dependent kinase 11B	P21127	YES	YES	YLPALQGCR	425	0.00222268	0.0119565	0.042257	0.211937	0.0917258	0.935712	-0.00783844	0.0486502	0.817184	0.042257
CDK11B	Cyclin-dependent kinase 11B	P21127	YES	YES	DLLSDLQDISDSER	274	-0.00997822	0.00831393	0.235249	0.299893	0.559793	0.839655	0.495248	0.928004	0.370083	0.235249
CDK11B	Cyclin-dependent kinase 11B	P21127	YES	YES	AQHPNIVTVR	492	-0.000352681	0.00089152	0.1498	0.629903	-0.0287123	0.101544	-0.176409	0.786793	0.724546	0.1498
TAF1	Transcription initiation factor TFIID subunit 1	P21675	YES	YES	MLQENTR	1785	-1.76125	1.53466	-1.39391	1.61738	0.691135	1.04721	-0.476727	0.247644	0.170357	-1.39391
TAF1	Transcription initiation factor TFIID subunit 1	P21675	YES	YES	KAFPSHSESSIR	853	1.44078	1.32081	0.313774	0.273624	-1.11166	0.273714	1.00655	1.36172	0.38417	0.313774
TAF1	Transcription initiation factor TFIID subunit 1	P21675	YES	YES	DLPNTYPFHTPVNAK	1419	0.867487	0.839065	0.207213	0.135853	-0.0806601	0.0402799	0.478578	0.374006	0.587698	0.207213
TAF1	Transcription initiation factor TFIID subunit 1	P21675	YES	YES	LLPSVTELFPEFRPGK	243	0.574306	0.79405	0.73759	0.780992	0.806596	1.15045	0.483697	0.663102	0.769585	0.73759
TAF1	Transcription initiation factor TFIID subunit 1	P21675	YES	YES	WEVIDVVR	1044	0.343917	0.63474	0.268899	0.387837	0.146893	0.160534	0.457797	0.855456	0.0305401	0.268899
TAF1	Transcription initiation factor TFIID subunit 1	P21675	YES	YES	QLIESADEVR	1349	-0.971198	0.470443	-0.131546	0.147521	0.212951	0.331458	0.218054	0.326432	0.275776	-0.131546
TAF1	Transcription initiation factor TFIID subunit 1	P21675	YES	YES	FSQSTGDIDKVTDTKPR	342	0.228899	0.398648	0.372472	0.746031	0.345683	0.728739	-0.00860543	0.011717	0.068287	0.372472
TAF1	Transcription initiation factor TFIID subunit 1	P21675	YES	YES	ASLAGWLPSSMTR	452	0.718509	0.343838	1.47029	0.863011	1.60056	0.944182	0.0463411	0.0125179	0.259509	1.47029
TAF1	Transcription initiation factor TFIID subunit 1	P21675	YES	YES	FSVAEHQER	1074	-0.197745	0.32244	-0.282383	0.501993	0.194014	0.306113	0.421384	0.981601	0.619894	-0.282383
TAF1	Transcription initiation factor TFIID subunit 1	P21675	YES	YES	IITRPMDLQTLR	1441	0.0983529	0.290206	-0.0645241	0.223181	0.189582	0.871461	0.147423	0.616403	0.220767	-0.0645241
TAF1	Transcription initiation factor TFIID subunit 1	P21675	YES	YES	KTEHEPVIK	391	0.24475	0.274819	0.0440771	0.0390302	0.259424	0.311752	-0.214557	0.208402	0.209482	0.0440771
TAF1	Transcription initiation factor TFIID subunit 1	P21675	YES	YES	GTFGGNIIQHSIPAVELR	603	-0.278923	0.219403	-0.0986125	0.121893	-0.395809	0.428842	-0.615834	0.660344	0.465415	-0.0986125
TAF1	Transcription initiation factor TFIID subunit 1	P21675	YES	YES	QASGGGEMFFMR	676	0.192558	0.211911	0.277618	0.359424	0.497874	0.758351	0.0894433	0.0776044	1.63059	0.277618
TAF1	Transcription initiation factor TFIID subunit 1	P21675	YES	YES	QPFFPTHMGPIK	621	0.26603	0.198803	0.952798	0.980849	0.619729	0.52113	0.851214	0.89539	0.284539	0.952798
TAF1	Transcription initiation factor TFIID subunit 1	P21675	YES	YES	YSFGALSQPGPHSVQPLLK	644	-0.0621292	0.148804	0.150352	0.512133	0.140316	0.476369	0.102608	0.343189	0.396779	0.150352
TAF1	Transcription initiation factor TFIID subunit 1	P21675	YES	YES	MLLAAGSAASGNNHR	1153	-0.1233	0.0862699	0.625269	0.869377	0.803251	0.569205	0.366157	0.376291	0.320736	0.625269
TAF1	Transcription initiation factor TFIID subunit 1	P21675	YES	YES	VIVNPMDLETIRK	1564	-0.0807069	0.0730924	0.0731927	0.0966502	-0.392089	0.321054	0.0787907	0.109831	0.00012241	0.0731927
TAF1	Transcription initiation factor TFIID subunit 1	P21675	YES	YES	ESFLDDVNLILANSVK	1587	-0.118891	0.0550407	-0.573549	0.386682	-0.553395	0.37793	-0.711254	0.495073	0.0801412	-0.573549
NME2	Nucleoside diphosphate kinase B	P22392	NO	YES	GLVGEIIKR	19	-0.165012	0.673422	0.0533911	0.208021	0.0222579	0.0814563	0.0559423	0.206727	0.176922	0.0533911
NME2	Nucleoside diphosphate kinase B	P22392	NO	YES	QHYIDLK	50	0.224725	0.56363	-0.107423	0.187135	-0.629245	1.22888	-0.431394	0.804166	0.756973	-0.107423
NME2	Nucleoside diphosphate kinase B	P22392	NO	YES	TFIAIKPDGVQR	7	-0.0963553	0.429868	-0.0711188	0.352729	-0.194558	0.696132	0.0618256	0.242555	1.3586	-0.0711188
NME2	Nucleoside diphosphate kinase B	P22392	NO	YES	DRPFFPGLVK	57	0.0450445	0.361021	0.00357962	0.0145864	-0.0580465	0.667672	-0.0896541	1.00967	2.55453	0.00357962
NME2	Nucleoside diphosphate kinase B	P22392	NO	YES	SCAHDWVYE	144	0.305853	0.335521	-0.449393	0.341142	0.158611	0.121108	0.428091	0.522797	0.153441	-0.449393
NME2	Nucleoside diphosphate kinase B	P22392	NO	YES	GLVGEIIK	19	-0.314643	0.282519	0.00993798	0.0117187	0.112759	0.271581	0.343542	1.09788	0.228767	0.00993798
NME2	Nucleoside diphosphate kinase B	P22392	NO	YES	GDFCIQVGR	106	0.0595916	0.26814	0.0398779	0.162151	0.026848	0.102087	0.166044	0.898173	0.364069	0.0398779
NME2	Nucleoside diphosphate kinase B	P22392	NO	YES	YMNSGPVVAMVWEGLNVVK	67	-0.175708	0.150508	0.238546	0.171187	0.218833	0.189004	-0.0844656	0.0600102	0.012272	0.238546
NME2	Nucleoside diphosphate kinase B	P22392	NO	YES	EISLWFKPEELVDYK	129	0.0642106	0.0739908	-0.00511944	0.00448545	0.0221931	0.0209332	0.195074	0.299714	0.204019	-0.00511944
NME2	Nucleoside diphosphate kinase B	P22392	NO	YES	NIIHGSDSVK	115	0.0329267	0.0625302	-0.0480279	0.0852981	-0.179883	0.450145	0.139668	0.369204	1.30548	-0.0480279
NME2	Nucleoside diphosphate kinase B	P22392	NO	YES	VMLGETNPADSKPGTIR	89	0.01506	0.048455	-0.0157953	0.0378862	-0.11532	0.457485	0.0641285	0.243	0.573431	-0.0157953
PRKACG	cAMP-dependent protein kinase catalytic subunit gamma	P22612	YES	YES	SLLQVDLTKR	272	0.5878	0.176844	0.503284	0.158892	0.210871	0.0597916	0.0450133	0.0125117	0.162176	0.503284
PRKACB	cAMP-dependent protein kinase catalytic subunit beta	P22694	YES	YES	LEYAFKDNSNLYMVMEYVPGGEMFSHLR	107	-0.782531	0.41791	0.579836	0.295185	-0.587199	0.401396	-0.693361	0.43065	0.137817	0.579836
PRKACB	cAMP-dependent protein kinase catalytic subunit beta	P22694	YES	YES	ILQAVNFPFLVR	95	-0.046691	0.0809267	0.286029	0.69697	0.331467	0.72972	0.132423	0.223907	0.424021	0.286029
RPS6KB1	Ribosomal protein S6 kinase beta-1	P23443	YES	YES	NILEEVKHPFIVDLIYAFQTGGK	145	1.06424	1.0326	-0.0592889	0.0372279	1.21134	0.639851	2.94142	3.2803	2.44293	-0.0592889
RPS6KB1	Ribosomal protein S6 kinase beta-1	P23443	YES	YES	KVEPPFKPLLQSEEDVSQFDSK	364	-1.04599	1.02839	-0.284188	0.360271	-0.749629	3.50252	-1.08083	4.46037	3.83817	-0.284188
RPS6KB1	Ribosomal protein S6 kinase beta-1	P23443	YES	YES	DGFYPAPDFR	8	-2.00631	0.90089	-0.336206	0.100871	-0.421441	0.138347	-0.245132	0.0724119	0.107375	-0.336206
RPS6KB1	Ribosomal protein S6 kinase beta-1	P23443	YES	YES	QAFPMISK	509	0.177741	0.667758	0.262202	0.974622	0.463626	2.11817	0.349133	1.35522	1.49462	0.262202
RPS6KB1	Ribosomal protein S6 kinase beta-1	P23443	YES	YES	IRPECFELLR	86	-0.263868	0.594741	-0.0958121	0.523761	-0.818952	6.13116	-1.31949	6.15934	7.54938	-0.0958121
RPS6KB1	Ribosomal protein S6 kinase beta-1	P23443	YES	YES	LGAGPGDAGEVQAHPFFR	336	-0.206678	0.519452	-0.145662	0.899723	-0.828637	5.3571	-1.15808	5.86276	5.41837	-0.145662
RPS6KB1	Ribosomal protein S6 kinase beta-1	P23443	YES	YES	FSPGDFWGR	451	-0.103888	0.376961	0.0420148	0.116074	0.0612045	0.256803	0.0870943	0.392774	0.494519	0.0420148
RPS6KB1	Ribosomal protein S6 kinase beta-1	P23443	YES	YES	HINWEELLAR	354	-0.185365	0.307231	-0.0957381	0.45693	-0.745004	4.87925	-1.08137	5.24032	5.32823	-0.0957381
RPS6KB1	Ribosomal protein S6 kinase beta-1	P23443	YES	YES	DLKPENIMLNHQGHVK	218	-0.148832	0.124724	0.0875789	0.0925971	-0.802754	1.44671	-1.03634	1.83566	1.92278	0.0875789
RPS6KB1	Ribosomal protein S6 kinase beta-1	P23443	YES	YES	LNLPPYLTQEAR	310	-0.0812795	0.0999578	0.00706174	0.0136998	-1.20918	1.79397	-1.79277	3.05443	4.52023	0.00706174
RPS6KB1	Ribosomal protein S6 kinase beta-1	P23443	YES	YES	TIDKILK	301	0.121513	0.0522715	-0.473612	0.248132	0.0975145	0.0487976	-1.13089	0.671529	1.08371	-0.473612
RPS6KB1	Ribosomal protein S6 kinase beta-1	P23443	YES	YES	ESIHDGTVTHTFCGTIEYMAPEILMR	242	0.0406536	0.0277953	0.0447422	0.03647	-0.747311	0.990383	-1.21766	1.64748	2.33959	0.0447422
RPS6KB1	Ribosomal protein S6 kinase beta-1	P23443	YES	YES	CKLNLPPYLTQEAR	308	-0.0376162	0.0159952	-0.907673	0.434988	-0.666332	0.442928	-0.827451	0.575638	0.960224	-0.907673
ITPKA	Inositol-trisphosphate 3-kinase A	P23677	NO	YES	GNVQLEAGEDVGQK	151	1.09019	0.754371	-0.30025	0.109597	0.460771	0.221991	-0.297205	0.14969	0.0151441	-0.30025
ITPKA	Inositol-trisphosphate 3-kinase A	P23677	NO	YES	VFEEFVQGDEEVLRR	358	-0.444681	0.706924	-1.11791	0.981111	-0.4904	0.976294	-0.613211	1.1665	1.13653	-1.11791
ITPKA	Inositol-trisphosphate 3-kinase A	P23677	NO	YES	MLAVDPEAPTEEEHAQR	292	-0.944382	0.625937	-0.170171	0.129578	0.0957711	0.0897765	-0.258788	0.30225	0.278057	-0.170171
ITPKA	Inositol-trisphosphate 3-kinase A	P23677	NO	YES	VFEEFVQGDEEVLR	358	-0.559061	0.469167	-0.318022	0.21823	0.23516	0.2486	0.733955	1.05401	0.488451	-0.318022
ITPKA	Inositol-trisphosphate 3-kinase A	P23677	NO	YES	TTPLPDGQILDHR	420	-0.232073	0.402837	-0.185639	0.376053	-0.454208	0.70835	-0.372437	0.662134	0.829618	-0.185639
ITPKA	Inositol-trisphosphate 3-kinase A	P23677	NO	YES	TMVNLPVISPFK	172	0.119909	0.250294	0.0381146	0.0778448	0.212164	0.634393	0.335237	1.1734	1.31004	0.0381146
ITPKA	Inositol-trisphosphate 3-kinase A	P23677	NO	YES	AGVWLIDFGK	410	-0.16037	0.232181	0.0797303	0.119799	-0.203038	0.567449	-0.315704	0.512532	0.00890289	0.0797303
ITPKA	Inositol-trisphosphate 3-kinase A	P23677	NO	YES	AAGTSGLILKR	200	0.29468	0.230632	0.527048	0.484453	0.212132	0.201824	0.526766	0.672198	0.243552	0.527048
ITPKA	Inositol-trisphosphate 3-kinase A	P23677	NO	YES	DTLEVSEFFR	382	-0.056283	0.170464	0.0227142	0.0516236	-0.0215523	0.0593088	0.0119229	0.0326169	0.13834	0.0227142
ITPKA	Inositol-trisphosphate 3-kinase A	P23677	NO	YES	YAWVQLAGHTGSFK	186	-0.015672	0.00933983	0.0159498	0.0148199	0.732441	0.754973	0.690903	1.03307	0.547757	0.0159498
DGKA	Diacylglycerol kinase alpha	P23743	NO	YES	ILKDLEMSK	485	-1.25452	1.19467	-1.55867	0.457389	0.0338119	0.0202352	0.474256	0.376097	0.682086	-1.55867
DGKA	Diacylglycerol kinase alpha	P23743	NO	YES	WSVEVIPQQTEEK	500	-0.924098	0.972374	-0.807824	0.882417	-0.460226	0.569498	-0.250905	0.231812	0.0281299	-0.807824
DGKA	Diacylglycerol kinase alpha	P23743	NO	YES	WGGGYEGQNLAK	473	1.20123	0.68892	0.919443	0.491021	0.975579	0.533617	1.32948	0.780241	0.69688	0.919443
DGKA	Diacylglycerol kinase alpha	P23743	NO	YES	IDPVPNTHPLLVFVNPK	368	-0.18027	0.575982	0.00136415	0.00316365	-0.0157461	0.0400861	0.120538	0.302938	0.140401	0.00136415
DGKA	Diacylglycerol kinase alpha	P23743	NO	YES	RLEVVGLEGAIEMGQIYTK	653	-0.406372	0.563594	-0.00353657	0.0036979	-0.241128	0.377355	-0.456006	0.521698	0.15968	-0.00353657
DGKA	Diacylglycerol kinase alpha	P23743	NO	YES	VITDPDILK	635	-0.462267	0.558483	-0.759166	0.754955	0.270282	1.29195	-0.247437	0.284365	0.77083	-0.759166
DGKA	Diacylglycerol kinase alpha	P23743	NO	YES	RPHGDIYGINQALGATAK	617	-0.258727	0.476023	0.0038615	0.00400645	0.102211	0.127946	0.165922	0.241557	0.154221	0.0038615
DGKA	Diacylglycerol kinase alpha	P23743	NO	YES	DGPEIGLR	412	-0.164678	0.356869	0.125704	0.353661	0.0638934	0.122521	0.135631	0.385555	0.40738	0.125704
DGKA	Diacylglycerol kinase alpha	P23743	NO	YES	TMDDLNLSTSEALR	354	0.210969	0.345129	0.406171	0.762646	0.159707	0.221608	0.16429	0.280394	0.381435	0.406171
DGKA	Diacylglycerol kinase alpha	P23743	NO	YES	ANLPVLPPVAVLPLGTGNDLAR	448	0.227023	0.254798	0.286564	0.368468	-0.0954949	0.0966588	0.184411	0.262036	0.184475	0.286564
DGKA	Diacylglycerol kinase alpha	P23743	NO	YES	DIGVQSHVWVR	264	0.323041	0.23434	0.493239	0.296284	0.57659	0.439197	-0.0497274	0.0289669	0.1087	0.493239
DGKA	Diacylglycerol kinase alpha	P23743	NO	YES	QVFNLLK	405	0.209662	0.114505	-0.139304	0.0499547	-0.288507	0.163774	0.518107	0.346411	0.303879	-0.139304
DGKA	Diacylglycerol kinase alpha	P23743	NO	YES	STNFFGFLS	727	0.135322	0.110926	0.511025	0.614337	0.527601	0.681275	0.725394	0.870892	0.230313	0.511025
DGKA	Diacylglycerol kinase alpha	P23743	NO	YES	ALPCEVSTYAK	250	-0.0803148	0.0927617	-0.971988	0.831259	-1.06797	1.02417	0.0881102	0.100084	1.10119	-0.971988
DGKA	Diacylglycerol kinase alpha	P23743	NO	YES	FQYILNPR	397	0.0380956	0.0917017	-0.139495	0.245025	0.0234196	0.0574347	0.0499186	0.0790588	0.15375	-0.139495
DGKA	Diacylglycerol kinase alpha	P23743	NO	YES	VLWKFQYILNPR	393	0.0968848	0.0759734	-0.0420547	0.0261764	0.222639	0.176304	0.13193	0.0831897	0.0270098	-0.0420547
DGKA	Diacylglycerol kinase alpha	P23743	NO	YES	QVFNLLKDGPEIGLR	405	0.078469	0.0496176	0.172075	0.0964635	0.717735	0.677084	-0.23017	0.141424	0.435451	0.172075
DTYMK	Thymidylate kinase	P23919	NO	YES	QPDVGLPKPDLVLFLQLQLADAAK	119	-1.89159	1.29658	0.753883	0.936208	0.376144	0.395236	0.130209	0.10771	0.03355	0.753883
DTYMK	Thymidylate kinase	P23919	NO	YES	SDVEDHSVHLLFSANR	61	0.564209	0.9433	-0.337606	0.640483	-0.42533	0.901045	-0.315997	0.60903	0.765191	-0.337606
DTYMK	Thymidylate kinase	P23919	NO	YES	WEQVPLIKEK	77	-0.26997	0.651804	-0.220486	0.466339	-0.317027	0.533161	-0.198293	0.281087	0.158854	-0.220486
DTYMK	Thymidylate kinase	P23919	NO	YES	RGALIVLEGVDRAGK	5	0.606465	0.598164	-0.147407	0.0741815	0.810914	0.858093	-0.0055403	0.00232154	0.808802	-0.147407
DTYMK	Thymidylate kinase	P23919	NO	YES	SIEAVHEDIR	183	0.19769	0.576636	0.0118466	0.0281036	-0.137099	0.547817	-0.097393	0.36723	0.160998	0.0118466
DTYMK	Thymidylate kinase	P23919	NO	YES	QPDVGLPKPDLVLFLQLQLADAAKR	119	-0.60868	0.549328	0.0398151	0.0395872	-0.507146	0.667115	-0.748756	0.825681	1.03692	0.0398151
DTYMK	Thymidylate kinase	P23919	NO	YES	LVEALCAAGHR	26	0.108494	0.530376	0.0805796	0.352808	0.101633	0.506447	-0.0296062	0.192731	0.0165539	0.0805796
DTYMK	Thymidylate kinase	P23919	NO	YES	GALIVLEGVDR	6	0.0647776	0.524433	0.0872668	0.525966	0.0544335	0.537525	0.0511296	0.391045	0.0657079	0.0872668
DTYMK	Thymidylate kinase	P23919	NO	YES	SDVEDHSVHLLFSANRWEQVPLIKEK	61	-0.232218	0.436922	0.0756013	0.107751	-0.0426104	0.0805718	-0.123966	0.356074	0.147776	0.0756013
DTYMK	Thymidylate kinase	P23919	NO	YES	EKLSQGVTLVVDR	85	-0.147605	0.405456	-0.0629766	0.120932	-0.425536	1.293	-0.274234	0.979853	1.23807	-0.0629766
DTYMK	Thymidylate kinase	P23919	NO	YES	KSDVEDHSVHLLFSANR	60	0.26654	0.3974	0.186169	0.230951	0.0204294	0.0254383	0.202165	0.237027	0.261869	0.186169
DTYMK	Thymidylate kinase	P23919	NO	YES	TATEKPLGELWK	201	-0.0756777	0.380105	0.0629958	0.43466	0.0457289	0.335973	0.0886293	0.858209	0.735308	0.0629958
DTYMK	Thymidylate kinase	P23919	NO	YES	LLSSYLQKK	52	-0.799817	0.333415	-0.0573271	0.0121895	-0.274242	0.058121	-0.126899	0.0282881	0.173007	-0.0573271
DTYMK	Thymidylate kinase	P23919	NO	YES	YAFSGVAFTGAK	98	0.0534027	0.290272	0.0430866	0.17948	0.0224674	0.0969035	0.0471621	0.280588	0.220533	0.0430866
DTYMK	Thymidylate kinase	P23919	NO	YES	KLVEALCAAGHR	25	0.0626349	0.287194	0.018123	0.0834073	0.0412526	0.252841	0.0127189	0.0612543	0.0229251	0.018123
DTYMK	Thymidylate kinase	P23919	NO	YES	EKLSQGVTLVVDRYAFSGVAFTGAK	85	-0.295218	0.284695	0.209176	0.252336	0.28925	0.465681	-0.4571	0.521628	0.173587	0.209176
DTYMK	Thymidylate kinase	P23919	NO	YES	KLVEALCAAGHRAELLR	25	0.341172	0.283187	0.435875	0.445395	0.545154	0.588726	-0.340509	0.195928	0.417362	0.435875
DTYMK	Thymidylate kinase	P23919	NO	YES	RGAFGHER	143	0.344646	0.252951	-0.557265	0.343983	-0.328926	0.214032	-0.337274	0.246768	0.687487	-0.557265
DTYMK	Thymidylate kinase	P23919	NO	YES	ENFSLDWCK	110	0.063432	0.234762	0.0749079	0.32473	0.0947777	0.482738	0.0890586	0.485726	0.258922	0.0749079
DTYMK	Thymidylate kinase	P23919	NO	YES	SDVEDHSVHLLFSANRWEQVPLIK	61	0.0825042	0.194036	0.0720171	0.145711	-0.0376032	0.0854843	-0.210083	0.682131	0.296694	0.0720171
DTYMK	Thymidylate kinase	P23919	NO	YES	CFHQLMK	163	0.0981728	0.177049	0.36838	1.15595	0.329323	0.948438	-0.0941411	0.0960853	0.798459	0.36838
DTYMK	Thymidylate kinase	P23919	NO	YES	AELLRFPER	37	-0.0939635	0.155652	0.144709	0.629591	0.0174008	0.0805956	-0.0135242	0.0537946	0.0805879	0.144709
DTYMK	Thymidylate kinase	P23919	NO	YES	YENGAFQER	151	-0.0469079	0.123148	0.0046438	0.0137753	0.12872	0.66614	0.167893	1.00667	1.23694	0.0046438
DTYMK	Thymidylate kinase	P23919	NO	YES	LSQGVTLVVDRYAFSGVAFTGAK	87	-0.0246077	0.0882451	0.0851074	0.341742	0.0945545	0.462579	-0.0852003	0.400621	0.140355	0.0851074
DTYMK	Thymidylate kinase	P23919	NO	YES	LSQGVTLVVDR	87	0.0139748	0.0726329	0.000824862	0.00368306	-0.0095964	0.0527327	-0.032982	0.214783	0.690995	0.000824862
DTYMK	Thymidylate kinase	P23919	NO	YES	LLSSYLQK	52	0.0229282	0.0640873	0.0658747	0.193182	0.0190402	0.0504079	0.064135	0.181157	0.0121161	0.0658747
DTYMK	Thymidylate kinase	P23919	NO	YES	KSDVEDHSVHLLFSANRWEQVPLIK	60	0.0664381	0.0578714	-0.106124	0.105862	-0.414617	0.519562	-0.456247	0.595842	0.190629	-0.106124
DTYMK	Thymidylate kinase	P23919	NO	YES	WEQVPLIK	77	-0.0162156	0.0501843	-0.416127	0.640056	-0.136339	0.573256	-0.435689	0.740124	1.00125	-0.416127
DTYMK	Thymidylate kinase	P23919	NO	YES	RGALIVLEGVDR	5	-0.0174071	0.0453778	0.108674	0.346952	0.120822	0.371358	0.0321913	0.0891499	0.110352	0.108674
DTYMK	Thymidylate kinase	P23919	NO	YES	VLSEDAIR	193	-0.013094	0.0414716	0.0237329	0.0773069	0.0974389	0.387478	0.0332427	0.155193	0.170686	0.0237329
DTYMK	Thymidylate kinase	P23919	NO	YES	DTTLNWK	170	-0.00959636	0.0237118	-0.0253629	0.0600571	0.108146	0.808524	0.0944752	0.366902	0.676752	-0.0253629
PRKCH	Protein kinase C eta type	P24723	YES	YES	LADFGMCK	495	-1.53908	0.810958	-2.09058	3.97167	-3.72509	6.64525	-5.39052	6.59908	5.19476	-2.09058
PRKCH	Protein kinase C eta type	P24723	YES	YES	EEPVLTPIDEGHLPMINQDEFR	651	-0.21894	0.118327	-0.941943	0.612913	-0.810865	0.682827	-0.571728	0.40147	0.867685	-0.941943
CDK2	Cyclin-dependent kinase 2	P24941	YES	YES	TLGTPDEVVWPGVTSMPDYKPSFPK	218	-1.20964	1.20073	-1.82663	3.89948	-2.95384	4.33096	-3.78081	5.41411	4.38615	-1.82663
CDK2	Cyclin-dependent kinase 2	P24941	YES	YES	APEILLGCK	170	-0.858538	0.958613	-2.28945	7.24297	-3.92257	4.60468	-4.61181	6.62249	6.43168	-2.28945
CDK2	Cyclin-dependent kinase 2	P24941	YES	YES	LTGEVVALKK	25	-1.01131	0.901741	-2.15661	2.53573	-1.24689	1.05313	-1.76174	1.92039	1.5305	-2.15661
CDK2	Cyclin-dependent kinase 2	P24941	YES	YES	ALFPGDSEIDQLFR	201	-0.86504	0.799037	-1.42506	5.45	-2.19471	7.47396	-2.6966	7.36298	8.32924	-1.42506
CDK2	Cyclin-dependent kinase 2	P24941	YES	YES	IRLDTETEGVPSTAIR	35	-1.01158	0.789757	-2.14119	2.95694	-3.66925	4.11573	-3.80095	3.05546	3.89599	-2.14119
CDK2	Cyclin-dependent kinase 2	P24941	YES	YES	AALAHPFFQDVTKPVPHLRL	279	-1.03177	0.755572	-1.46834	6.12496	-2.57284	7.19076	-3.10488	8.72009	7.37655	-1.46834
CDK2	Cyclin-dependent kinase 2	P24941	YES	YES	DLKPQNLLINTEGAIK	127	-1.23207	0.734974	-1.53805	6.81166	-3.03097	8.32242	-3.49619	6.69102	5.27644	-1.53805
CDK2	Cyclin-dependent kinase 2	P24941	YES	YES	VVPPLDEDGR	251	-0.861796	0.719771	-1.86939	4.69051	-3.10988	3.4929	-3.04076	8.61619	5.29119	-1.86939
CDK2	Cyclin-dependent kinase 2	P24941	YES	YES	SLLSQMLHYDPNKR	261	-0.844055	0.646052	-1.60636	4.95355	-2.33703	7.73672	-3.07131	5.0382	6.87962	-1.60636
CDK2	Cyclin-dependent kinase 2	P24941	YES	YES	FMDASALTGIPLPLIK	90	-0.940993	0.628874	-1.77696	4.20611	-3.49736	5.85379	-3.6262	5.56552	5.10656	-1.77696
CDK2	Cyclin-dependent kinase 2	P24941	YES	YES	RALFPGDSEIDQLFR	200	-0.7698	0.615728	-1.5531	4.49389	-2.99852	4.88148	-3.96979	5.29565	2.79023	-1.5531
CDK2	Cyclin-dependent kinase 2	P24941	YES	YES	SYLFQLLQGLAFCHSHR	106	1.07554	0.596714	-1.92794	1.22789	-0.786474	0.3399	0.217447	0.0933699	0.178064	-1.92794
CDK2	Cyclin-dependent kinase 2	P24941	YES	YES	TYTHEVVTLWYR	158	-1.19622	0.5839	-2.00052	3.1591	-2.77433	2.66134	-2.80456	2.45916	3.21454	-2.00052
CDK2	Cyclin-dependent kinase 2	P24941	YES	YES	NKLTGEVVALKK	23	-1.10622	0.571621	-2.01116	4.7067	-4.22997	5.87205	-4.83253	6.80947	6.60303	-2.01116
CDK2	Cyclin-dependent kinase 2	P24941	YES	YES	LDTETEGVPSTAIR	37	-0.846775	0.569501	-1.67613	6.2778	-2.69069	6.84623	-3.90677	5.48219	5.50444	-1.67613
CDK2	Cyclin-dependent kinase 2	P24941	YES	YES	NKLTGEVVALK	23	-0.980942	0.520577	-2.15429	2.59296	-4.0902	4.69978	-3.61603	4.64895	3.85594	-2.15429
CDK2	Cyclin-dependent kinase 2	P24941	YES	YES	LTGEVVALK	25	-0.552127	0.327974	-3.67151	4.3943	-3.442	4.60298	-4.2955	5.10552	4.28572	-3.67151
CDK2	Cyclin-dependent kinase 2	P24941	YES	YES	IGEGTYGVVYK	10	-0.0409388	0.322395	-0.218984	1.96844	-0.279573	3.08004	-0.270462	3.07529	3.21986	-0.218984
CDK2	Cyclin-dependent kinase 2	P24941	YES	YES	AALAHPFFQDVTKPVPHLR	279	-0.263391	0.165463	-1.18147	0.760481	-0.450334	0.457499	-1.27153	0.85071	1.18781	-1.18147
CDK2	Cyclin-dependent kinase 2	P24941	YES	YES	ELNHPNIVK	57	-0.392359	0.148117	-1.44573	0.656015	-3.05741	2.42335	-3.50856	3.00081	3.00176	-1.44573
CDK2	Cyclin-dependent kinase 2	P24941	YES	YES	LADFGLAR	143	0.0574177	0.14771	-0.220536	0.471501	-0.709175	0.87193	-0.714736	1.59045	1.06159	-0.220536
GRK2	Beta-adrenergic receptor kinase 1	P25098	YES	YES	ILLPEPSIR	32	-0.181992	0.791453	-0.258742	0.934558	-0.492584	2.74371	-0.766066	3.7842	2.89413	-0.258742
GRK2	Beta-adrenergic receptor kinase 1	P25098	YES	YES	QFILQCDSDPELVQWKK	629	1.52157	0.744492	0.780653	0.248983	1.35756	0.405615	-1.01057	0.332838	0.255849	0.780653
GRK2	Beta-adrenergic receptor kinase 1	P25098	YES	YES	WQQEVAETVFDTINAETDRLEAR	517	-0.437506	0.711374	-0.0800909	0.0990903	-0.628844	1.1916	-0.994631	2.0797	1.72061	-0.0800909
GRK2	Beta-adrenergic receptor kinase 1	P25098	YES	YES	GVAYDSSADWFSLGCMLFK	365	1.00185	0.592843	-0.311543	0.119536	0.35602	0.150847	1.32669	0.814484	0.260012	-0.311543
GRK2	Beta-adrenergic receptor kinase 1	P25098	YES	YES	NFPLTISER	508	1.26426	0.552632	-0.560312	0.1617	-0.395683	0.1298	-0.0319723	0.00928827	0.350807	-0.560312
GRK2	Beta-adrenergic receptor kinase 1	P25098	YES	YES	YLEDRGEVTFEK	46	-0.734266	0.542681	0.0460099	0.0239068	-0.991762	0.772462	-0.768235	0.472847	0.502679	0.0460099
GRK2	Beta-adrenergic receptor kinase 1	P25098	YES	YES	GHSPFRQHK	387	-0.503791	0.445958	-0.764821	0.825175	-0.576923	0.581766	-0.153512	0.123816	0.20525	-0.764821
GRK2	Beta-adrenergic receptor kinase 1	P25098	YES	YES	SLLEGLLQR	423	-0.0898196	0.411711	-0.0390992	0.140012	-0.288854	2.15451	-0.390293	3.11727	2.66879	-0.0390992
GRK2	Beta-adrenergic receptor kinase 1	P25098	YES	YES	ISDLGLACDFSK	333	-0.277703	0.397239	-0.0282529	0.0441224	-1.05679	0.991732	-1.79385	0.96585	1.48516	-0.0282529
GRK2	Beta-adrenergic receptor kinase 1	P25098	YES	YES	YFYLFPNRLEWR	580	-0.198692	0.384739	-0.172382	0.345275	-0.0513772	0.112866	-0.0232055	0.0504615	0.250789	-0.172382
GRK2	Beta-adrenergic receptor kinase 1	P25098	YES	YES	QVPPDLFQPYIEEICQNLR	140	-0.653445	0.35744	-0.0527348	0.0394304	-1.06551	0.724728	-0.847678	0.794657	0.818848	-0.0527348
GRK2	Beta-adrenergic receptor kinase 1	P25098	YES	YES	ELLACSHPFSK	116	-0.221687	0.352336	-0.0184495	0.0244216	-0.29456	0.59944	-0.424225	0.993332	0.787862	-0.0184495
GRK2	Beta-adrenergic receptor kinase 1	P25098	YES	YES	SATEHVQGHLGK	127	-0.270194	0.306456	-0.0186943	0.0194558	-0.327843	0.90123	-0.655088	1.34905	0.482581	-0.0186943
GRK2	Beta-adrenergic receptor kinase 1	P25098	YES	YES	FIESDKFTR	165	0.0836802	0.223351	-0.0326567	0.0513171	-0.472846	1.35194	-0.854497	1.20875	1.26384	-0.0326567
GRK2	Beta-adrenergic receptor kinase 1	P25098	YES	YES	LLDSDQELYR	498	-0.122144	0.203261	-0.324265	0.536463	-0.583914	2.48269	-0.630886	2.37251	2.24376	-0.324265
GRK2	Beta-adrenergic receptor kinase 1	P25098	YES	YES	GGFGEVYGCR	200	-0.594818	0.199176	-0.507485	0.182696	-0.902635	0.389846	-0.296473	0.115207	0.287903	-0.507485
GRK2	Beta-adrenergic receptor kinase 1	P25098	YES	YES	DLKPANILLDEHGHVR	317	-0.132333	0.197564	-0.0576342	0.074504	-0.600893	0.964422	-2.03318	1.8947	0.867862	-0.0576342
GRK2	Beta-adrenergic receptor kinase 1	P25098	YES	YES	SATEHVQGHLGKK	127	0.128671	0.182506	0.0403098	0.0550333	0.0124425	0.0170643	0.139999	0.255752	0.463465	0.0403098
GRK2	Beta-adrenergic receptor kinase 1	P25098	YES	YES	QGETLALNER	231	0.198655	0.16195	-0.151335	0.111328	-1.55376	1.0345	-1.71236	2.35289	1.65713	-0.151335
GRK2	Beta-adrenergic receptor kinase 1	P25098	YES	YES	EAQQLVQR	653	-0.6712	0.145027	0.906298	0.349264	-1.50431	0.413164	1.23363	0.379586	0.203461	0.906298
GRK2	Beta-adrenergic receptor kinase 1	P25098	YES	YES	SPVVELSK	670	-0.0426682	0.14432	0.0221572	0.0586395	0.0336016	0.0942291	-0.0795867	0.279049	0.0055315	0.0221572
GRK2	Beta-adrenergic receptor kinase 1	P25098	YES	YES	YFYLFPNR	580	0.131567	0.132778	0.250723	0.338539	-0.0601354	0.0614026	0.276204	0.404007	0.0851968	0.250723
GRK2	Beta-adrenergic receptor kinase 1	P25098	YES	YES	LGYLLFR	63	-0.0480673	0.129939	-0.11965	0.415439	-0.458611	2.84032	-0.601529	3.80274	3.54144	-0.11965
GRK2	Beta-adrenergic receptor kinase 1	P25098	YES	YES	FYAAEIILGLEHMHNR	296	-0.20278	0.128288	0.0590433	0.0818278	-0.323423	0.545113	-0.951079	2.27903	1.73466	0.0590433
GRK2	Beta-adrenergic receptor kinase 1	P25098	YES	YES	SLDWQMVFLQK	455	0.114827	0.127858	0.100412	0.114403	-0.32307	0.389054	-0.549748	0.694568	0.796537	0.100412
GRK2	Beta-adrenergic receptor kinase 1	P25098	YES	YES	MGNPFLTQWQR	568	0.0188258	0.0393129	0.0774401	0.149145	0.14986	0.293219	0.364545	0.929884	0.884522	0.0774401
GRK2	Beta-adrenergic receptor kinase 1	P25098	YES	YES	SPVVELSKVPLVQR	670	0.00896938	0.0366223	0.0799504	0.431168	0.0640756	0.29602	0.0613017	0.311297	0.0952592	0.0799504
BRD2	Bromodomain-containing protein 2	P25440	YES	NO	TESSSAQQVAVSR	761	-0.650729	1.13137	-0.628031	0.712615	0.181526	0.177081	0.262571	0.264722	0.703501	-0.628031
BRD2	Bromodomain-containing protein 2	P25440	YES	NO	MLQNVTPHNKLPGEGNAGLLGLGPEAAAPGKR	1	-0.236227	0.375761	-0.0387302	0.0240481	-0.143287	0.238028	-0.235957	0.486893	0.0118297	-0.0387302
BRD2	Bromodomain-containing protein 2	P25440	YES	NO	DSNPEEIEIDFETLKPSTLR	678	-0.370557	0.303039	-0.153792	0.104347	-0.298489	0.36209	-0.197373	0.22548	0.10885	-0.153792
BRD2	Bromodomain-containing protein 2	P25440	YES	NO	ESGRPIKPPRK	319	-0.260795	0.266223	0.287148	0.300961	0.113623	0.110523	-0.0342218	0.032637	0.0343438	0.287148
BRD2	Bromodomain-containing protein 2	P25440	YES	NO	LQDVSGQLNSTK	740	-0.103496	0.201334	0.0566323	0.148741	0.191306	0.628509	0.124485	0.398858	0.735217	0.0566323
BRD2	Bromodomain-containing protein 2	P25440	YES	NO	AVHEQLAALSQGPISKPK	529	0.165437	0.144763	-0.372191	0.455605	-0.554387	0.808868	0.0603542	0.0699842	0.652797	-0.372191
BRD2	Bromodomain-containing protein 2	P25440	YES	NO	LAELQEQLR	520	-0.0428783	0.140836	0.0816108	0.30304	0.105703	0.393939	0.0980659	0.337197	0.425384	0.0816108
BRD2	Bromodomain-containing protein 2	P25440	YES	NO	YVLSCLR	702	0.0288761	0.091967	0.0413321	0.104392	-0.0422024	0.162686	-0.171992	0.539986	0.179556	0.0413321
BRD2	Bromodomain-containing protein 2	P25440	YES	NO	SLHSAGPPLLAVTAAPPAQPLAK	253	-0.0181789	0.0513919	0.0912984	0.222497	-0.138799	0.365544	-0.159239	0.612922	0.636926	0.0912984
BRD2	Bromodomain-containing protein 2	P25440	YES	NO	VVHIIQAR	665	0.0354571	0.0381676	0.167993	0.397794	0.053388	0.0692245	0.0399643	0.0714382	0.113235	0.167993
AK4	Adenylate kinase 4, mitochondrial	P27144	NO	YES	VYNLDFNPPHVHGIDDVTGEPLVQQEDDKPEAVAAR	135	-0.625654	1.16868	-0.243895	0.315702	-0.527053	1.86501	-0.659663	1.13189	1.65393	-0.243895
AK4	Adenylate kinase 4, mitochondrial	P27144	NO	YES	AVILGPPGSGKGTVCQR	8	-0.212317	1.15017	-0.26307	0.451317	-0.0303759	0.107593	-0.156548	0.596261	0.635062	-0.26307
AK4	Adenylate kinase 4, mitochondrial	P27144	NO	YES	QYKDVAKPVIELYK	173	-0.313956	0.662517	-0.194791	0.209882	0.00866413	0.0117973	-0.153596	0.324905	0.53002	-0.194791
AK4	Adenylate kinase 4, mitochondrial	P27144	NO	YES	RGQHWLLDGFPR	81	0.61493	0.603574	0.143478	0.164465	-0.353879	0.330612	-0.245206	0.248836	0.460929	0.143478
AK4	Adenylate kinase 4, mitochondrial	P27144	NO	YES	ASTEVGEMAK	46	0.154852	0.524307	0.0367646	0.0772745	0.0564888	0.192573	0.140059	0.55762	0.699814	0.0367646
AK4	Adenylate kinase 4, mitochondrial	P27144	NO	YES	IAQNFGLQHLSSGHFLR	25	-0.0560757	0.251352	-0.069124	0.348596	-0.100433	0.655477	-0.0255325	0.13578	0.417134	-0.069124
AK4	Adenylate kinase 4, mitochondrial	P27144	NO	YES	DVAKPVIELYK	176	-0.0447235	0.221027	-0.0952701	0.480254	-0.202163	1.51593	-0.0243023	0.112329	0.742786	-0.0952701
AK4	Adenylate kinase 4, mitochondrial	P27144	NO	YES	LMMSELENR	72	-0.0607277	0.185173	-0.119294	0.433256	0.0360684	0.0845288	0.126303	0.566524	0.302808	-0.119294
AK4	Adenylate kinase 4, mitochondrial	P27144	NO	YES	ITPIQSK	214	-0.211089	0.17919	-0.0481097	0.0452202	-0.180635	0.310005	-0.00330304	0.00460744	0.00702409	-0.0481097
AK4	Adenylate kinase 4, mitochondrial	P27144	NO	YES	SLLVPDHVITR	61	0.0370603	0.160991	-0.0253602	0.107924	-0.130591	0.702679	-0.03568	0.189085	0.391857	-0.0253602
AK4	Adenylate kinase 4, mitochondrial	P27144	NO	YES	IWPYVYTLFSNK	202	0.191929	0.155322	0.00550094	0.00409654	0.148277	0.184204	0.349226	0.425719	0.0969223	0.00550094
AK4	Adenylate kinase 4, mitochondrial	P27144	NO	YES	GQHWLLDGFPR	82	0.0441083	0.11068	-0.253748	0.385931	-0.265815	0.486267	-0.00253641	0.00560541	0.801888	-0.253748
AK4	Adenylate kinase 4, mitochondrial	P27144	NO	YES	WIHPPSGR	127	0.0755953	0.107222	0.131722	0.293146	0.00455793	0.0101508	0.044053	0.0815859	1.25624	0.131722
AK4	Adenylate kinase 4, mitochondrial	P27144	NO	YES	RWIHPPSGR	126	0.14196	0.06791	-0.296294	0.144012	0.389648	0.26837	0.0490685	0.0248332	0.112071	-0.296294
AK4	Adenylate kinase 4, mitochondrial	P27144	NO	YES	GVLHQFSGTETNK	189	0.0242397	0.0293981	0.0316298	0.0396216	-0.206544	0.395213	0.0837073	0.134769	0.184126	0.0316298
AK4	Adenylate kinase 4, mitochondrial	P27144	NO	YES	AVILGPPGSGK	8	-0.00809334	0.0197794	0.000723724	0.00177795	0.0042034	0.0091254	0.139272	0.503442	0.196523	0.000723724
MAPK3	Mitogen-activated protein kinase 3	P27361	YES	YES	EIQILLR	88	-1.44756	0.935319	-0.885872	0.424967	-0.326536	0.440081	-0.373276	1.31785	1.59617	-0.885872
MAPK3	Mitogen-activated protein kinase 3	P27361	YES	YES	DLKPSNLLINTTCDLK	166	-0.337265	0.567161	-0.0974152	0.316676	0.0354024	0.124182	-0.231666	1.14691	3.96369	-0.0974152
MAPK3	Mitogen-activated protein kinase 3	P27361	YES	YES	YTQLQYIGEGAYGMVSSAYDHVR	42	-0.206178	0.558405	-0.0681939	0.16929	0.162457	0.581392	-0.0966016	0.302185	0.777437	-0.0681939
MAPK3	Mitogen-activated protein kinase 3	P27361	YES	YES	MLTFNPNKR	310	0.798547	0.467268	0.803189	0.455079	0.809049	0.460076	-0.00927004	0.00333949	0.374955	0.803189
MAPK3	Mitogen-activated protein kinase 3	P27361	YES	YES	AAAAAQGGGGGEPR	2	-0.0479082	0.257178	-0.092467	0.595371	0.0350804	0.213804	0.0948658	0.617211	0.773658	-0.092467
MAPK3	Mitogen-activated protein kinase 3	P27361	YES	YES	IADPEHDHTGFLTEYVATR	190	-0.302017	0.0940607	0.40988	0.144962	-0.254618	0.0796497	-0.51794	0.167105	0.064652	0.40988
MAPK3	Mitogen-activated protein kinase 3	P27361	YES	YES	NYLQSLPSK	279	-0.0217501	0.0734512	0.11967	0.532478	0.179226	0.930812	0.28315	1.50918	0.995547	0.11967
MAPK3	Mitogen-activated protein kinase 3	P27361	YES	YES	LKELIFQETAR	360	0.0610062	0.0620145	0.392321	1.08369	0.140693	0.374347	-0.291134	0.421814	1.05167	0.392321
MAPK3	Mitogen-activated protein kinase 3	P27361	YES	YES	GQPFDVGPR	33	0.0162379	0.014544	-0.147894	0.0967363	0.237769	0.30012	-1.40296	0.778303	1.49634	-0.147894
MARK3	MAP/microtubule affinity-regulating kinase 3	P27448	YES	YES	FLVLNPIKR	287	-2.80536	4.7876	-3.33959	5.25336	-3.39638	3.63864	-3.15936	4.68769	5.68524	-3.33959
MARK3	MAP/microtubule affinity-regulating kinase 3	P27448	YES	YES	LFEVIETEK	118	-2.84889	4.26941	-2.40457	3.13454	-2.83307	4.10131	-2.55071	3.75335	2.77107	-2.40457
MARK3	MAP/microtubule affinity-regulating kinase 3	P27448	YES	YES	QIVSAVQYCHQK	161	-1.94512	2.35894	-2.11635	2.73876	-2.33482	3.24785	-2.16333	2.96046	1.79412	-2.11635
MARK3	MAP/microtubule affinity-regulating kinase 3	P27448	YES	YES	DLKAENLLLDADMNIK	178	-2.71461	2.18278	-2.62472	3.5121	-2.32459	3.18216	-2.10121	3.03489	2.39247	-2.62472
MARK3	MAP/microtubule affinity-regulating kinase 3	P27448	YES	YES	NTYVCSER	506	-1.74706	1.28424	-1.47762	1.02345	-0.315858	0.144252	0.383246	0.267979	0.223272	-1.47762
MARK3	MAP/microtubule affinity-regulating kinase 3	P27448	YES	YES	MKYDEITATYLLLGR	352	-0.960472	0.86951	-1.91922	2.71841	-1.16906	1.05007	-1.72518	2.17648	1.41754	-1.91922
MARK3	MAP/microtubule affinity-regulating kinase 3	P27448	YES	YES	GIAPASPMLGNASNPNKADIPER	464	-0.637687	0.76275	-0.468797	0.643188	-0.259838	0.617183	-0.582493	1.32074	0.935734	-0.468797
MARK3	MAP/microtubule affinity-regulating kinase 3	P27448	YES	YES	SQTSTADSDLKEDGISSR	436	-0.504567	0.725376	-0.0414863	0.0344075	-0.0902027	0.120129	0.00600282	0.00713809	0.00326178	-0.0414863
MARK3	MAP/microtubule affinity-regulating kinase 3	P27448	YES	YES	TPLPTVNER	5	0.249278	0.724393	-0.0416763	0.0663803	-0.0551946	0.0990771	0.0156864	0.0324525	0.0170262	-0.0416763
MARK3	MAP/microtubule affinity-regulating kinase 3	P27448	YES	YES	DTENHTSHGDGRQEVTSR	14	-0.443855	0.570098	-0.246918	0.271908	-0.199422	0.264004	-0.496038	0.739244	0.664224	-0.246918
MARK3	MAP/microtubule affinity-regulating kinase 3	P27448	YES	YES	RYSDHAGPAIPSVVAYPK	417	0.783056	0.516757	0.398127	0.182902	0.735055	0.40193	-0.240217	0.0898874	0.648595	0.398127
MARK3	MAP/microtubule affinity-regulating kinase 3	P27448	YES	YES	IANELKL	747	-0.391464	0.463328	-0.154964	0.151919	-0.939965	0.364826	0.0268562	0.0283398	0.0246514	-0.154964
MARK3	MAP/microtubule affinity-regulating kinase 3	P27448	YES	YES	RISGTSIAFK	732	-0.404615	0.416643	-0.409725	1.0551	-0.383463	0.828588	-0.544523	1.61875	1.11933	-0.409725
MARK3	MAP/microtubule affinity-regulating kinase 3	P27448	YES	YES	HSVIQNGKENSTIPDQR	519	-0.463547	0.378278	-0.734744	0.965865	-0.426352	0.36312	-1.90728	0.936587	1.28732	-0.734744
MARK3	MAP/microtubule affinity-regulating kinase 3	P27448	YES	YES	GSTNLFSK	600	-0.354995	0.354791	0.138415	0.288605	0.187161	0.377467	0.442017	1.34133	1.02722	0.138415
MARK3	MAP/microtubule affinity-regulating kinase 3	P27448	YES	YES	AENLLLDADMNIK	181	0.938602	0.351521	1.36805	0.543695	0.954419	0.351982	1.19217	0.462712	0.861551	1.36805
MARK3	MAP/microtubule affinity-regulating kinase 3	P27448	YES	YES	KVLDANNCDYEQR	681	0.242156	0.338554	-0.14742	0.168266	0.12359	0.162034	0.284146	0.521502	0.21163	-0.14742
MARK3	MAP/microtubule affinity-regulating kinase 3	P27448	YES	YES	TPVASTHSISSAATPDR	536	0.098643	0.305406	0.0630114	0.165546	0.103751	0.398304	0.0160183	0.0438697	0.347275	0.0630114
MARK3	MAP/microtubule affinity-regulating kinase 3	P27448	YES	YES	TATYNGPPASPSLSHEATPLSQTR	574	-0.431956	0.258701	0.171264	0.105028	0.13631	0.0933504	0.124465	0.0855919	0.186279	0.171264
MARK3	MAP/microtubule affinity-regulating kinase 3	P27448	YES	YES	ISGTSIAFK	733	-0.0834309	0.252448	0.309098	1.16754	0.232496	0.853644	0.37807	1.03018	0.58255	0.309098
MARK3	MAP/microtubule affinity-regulating kinase 3	P27448	YES	YES	SSTVPSSNTASGGMTR	489	0.0548882	0.121894	-0.145431	0.166643	0.152253	0.468901	0.0366072	0.0677825	0.0888353	-0.145431
MARK3	MAP/microtubule affinity-regulating kinase 3	P27448	YES	YES	YSDHAGPAIPSVVAYPK	418	0.0573522	0.0621757	0.579664	0.794496	0.304751	0.472973	-0.165964	0.230624	0.254871	0.579664
MARK3	MAP/microtubule affinity-regulating kinase 3	P27448	YES	YES	NSIASCADEQPHIGNYR	41	-0.0772025	0.0599837	-1.05253	0.522299	-0.545282	0.361229	0.269379	0.228714	0.617257	-1.05253
MARK3	MAP/microtubule affinity-regulating kinase 3	P27448	YES	YES	VRPSSDLNNSTGQSPHHK	387	0.0481454	0.0378807	-0.0502799	0.0717771	-0.208287	0.318839	0.192765	0.550657	0.233413	-0.0502799
DCK	Deoxycytidine kinase	P27707	NO	YES	NGGNVLQMMYEKPER	77	-2.67636	1.13014	-1.11289	2.05389	-0.653693	1.53743	-1.59668	1.05911	1.18644	-1.11289
DCK	Deoxycytidine kinase	P27707	NO	YES	SCPSFSASSEGTR	8	-0.870429	1.1096	-0.795685	0.882688	-0.912434	0.4585	-0.984553	1.92127	1.43854	-0.795685
DCK	Deoxycytidine kinase	P27707	NO	YES	GRNEEQGIPLEYLEK	193	0.15602	0.780224	0.0771563	0.268013	-0.151644	0.538259	-0.186349	1.06157	2.77051	0.0771563
DCK	Deoxycytidine kinase	P27707	NO	YES	ISIEGNIAAGK	24	-1.34443	0.616987	-0.559959	0.531598	-0.511821	0.333581	0.112049	0.118917	0.885459	-0.559959
DCK	Deoxycytidine kinase	P27707	NO	YES	QLCEDWEVVPEPVAR	43	-0.241078	0.571485	-0.209914	0.650512	-0.234937	0.784274	-0.292848	1.00756	0.799192	-0.209914
DCK	Deoxycytidine kinase	P27707	NO	YES	KISIEGNIAAGK	23	-0.937551	0.427991	0.486505	0.145869	0.846395	0.292758	-0.28638	0.075842	0.216208	0.486505
DCK	Deoxycytidine kinase	P27707	NO	YES	STFVNILK	35	-0.0950618	0.265734	0.0169613	0.0322228	-0.0411037	0.0982341	0.39092	0.371616	0.578796	0.0169613
DCK	Deoxycytidine kinase	P27707	NO	YES	WCNVQSTQDEFEELTMSQK	58	-0.248722	0.263738	-0.151187	0.0939489	-0.113492	0.11702	0.0270094	0.0197246	0.507497	-0.151187
DCK	Deoxycytidine kinase	P27707	NO	YES	DAEKPVLFFER	118	-0.0516041	0.132068	-0.209443	0.693208	2.61738e-05	6.89702e-05	-0.100957	0.185712	0.195424	-0.209443
DCK	Deoxycytidine kinase	P27707	NO	YES	VKEFLSTL	253	0.171295	0.111074	-0.369619	0.290967	0.296033	0.23717	0.281853	0.21033	0.389079	-0.369619
DCK	Deoxycytidine kinase	P27707	NO	YES	LKDAEKPVLFFER	116	0.0385738	0.0723931	-0.491933	0.620794	-0.627256	1.33096	-0.3119	0.566711	2.09872	-0.491933
MAPK1	Mitogen-activated protein kinase 1	P28482	YES	YES	YIHSANVLHR	139	-0.60023	1.3215	-0.176309	0.398316	-0.563516	0.670734	-0.324578	0.607376	2.9074	-0.176309
MAPK1	Mitogen-activated protein kinase 1	P28482	YES	YES	LKELIFEETAR	343	-0.274903	0.865528	0.0594336	0.215883	0.127406	0.589745	-0.063584	0.251344	2.46914	0.0594336
MAPK1	Mitogen-activated protein kinase 1	P28482	YES	YES	YTNLSYIGEGAYGMVCSAYDNVNKVR	25	-0.375972	0.821801	0.195979	0.224291	0.160837	0.249035	-0.598952	1.09533	1.70456	0.195979
MAPK1	Mitogen-activated protein kinase 1	P28482	YES	YES	NKVPWNR	271	0.249245	0.632072	-0.0426489	0.106219	0.439774	3.17045	0.751092	4.524	2.96215	-0.0426489
MAPK1	Mitogen-activated protein kinase 1	P28482	YES	YES	NYLLSLPHK	262	0.246797	0.607436	0.265085	1.04556	0.447072	2.12781	0.706832	3.54179	3.57692	0.265085
MAPK1	Mitogen-activated protein kinase 1	P28482	YES	YES	NYLLSLPHKNKVPWNR	262	0.531592	0.593717	-0.18225	0.136789	0.163415	0.12411	0.419368	0.415904	0.252077	-0.18225
MAPK1	Mitogen-activated protein kinase 1	P28482	YES	YES	DLKPSNLLLNTTCDLK	149	-0.339977	0.572392	-0.096237	0.316482	0.0416483	0.148713	-0.220723	1.04115	3.88916	-0.096237
MAPK1	Mitogen-activated protein kinase 1	P28482	YES	YES	LFPNADSK	278	1.42753	0.44998	1.05008	0.294571	1.8247	0.597964	-0.606196	0.115395	0.129959	1.05008
MAPK1	Mitogen-activated protein kinase 1	P28482	YES	YES	HYLDQLNHILGILGSPSQEDLNCIINLK	232	-0.481187	0.449379	-0.120656	0.0775229	-0.348623	0.384914	-0.143028	0.14264	0.323669	-0.120656
MAPK1	Mitogen-activated protein kinase 1	P28482	YES	YES	APEIMLNSK	195	0.256666	0.42429	0.180056	0.300584	0.200544	0.298583	-0.158495	0.246208	0.60468	0.180056
MAPK1	Mitogen-activated protein kinase 1	P28482	YES	YES	ELIFEETAR	345	-0.0589076	0.357664	-0.0322536	0.114621	0.121048	1.00395	0.0292247	0.159026	2.14222	-0.0322536
MAPK1	Mitogen-activated protein kinase 1	P28482	YES	YES	ALDLLDK	286	-0.109306	0.35225	0.079898	0.196756	0.1861	0.83051	-0.0548662	0.148572	1.61251	0.079898
MAPK1	Mitogen-activated protein kinase 1	P28482	YES	YES	FRHENIIGINDIIR	78	-0.137677	0.324553	0.125559	0.290043	0.240801	0.726163	-0.106934	0.243628	2.45853	0.125559
MAPK1	Mitogen-activated protein kinase 1	P28482	YES	YES	VADPDHDHTGFLTEYVATR	173	-0.115535	0.323454	0.0602663	0.145264	0.151277	0.498998	-0.195472	0.657061	2.72283	0.0602663
MAPK1	Mitogen-activated protein kinase 1	P28482	YES	YES	KISPFEHQTYCQR	55	-0.150237	0.309241	-0.0390469	0.0573552	0.191431	0.524689	-0.117197	0.260644	1.48997	-0.0390469
MAPK1	Mitogen-activated protein kinase 1	P28482	YES	YES	DVYIVQDLMETDLYK	100	-0.746493	0.291855	-0.978088	0.374027	0.417757	0.224028	0.427126	0.233812	0.0482459	-0.978088
MAPK1	Mitogen-activated protein kinase 1	P28482	YES	YES	AAAAAAGAGPEMVR	2	0.0492607	0.210146	-0.0175385	0.0837609	-0.0358817	0.317089	-0.429862	4.23432	6.07137	-0.0175385
MAPK1	Mitogen-activated protein kinase 1	P28482	YES	YES	YTNLSYIGEGAYGMVCSAYDNVNK	25	0.171403	0.196003	-0.393137	0.526846	0.352392	0.592967	-0.0895592	0.0955179	0.593139	-0.393137
MAPK1	Mitogen-activated protein kinase 1	P28482	YES	YES	MLTFNPHKR	293	0.398953	0.151879	-0.50805	0.142442	0.281875	0.122729	0.550405	0.300255	0.501972	-0.50805
MAPK1	Mitogen-activated protein kinase 1	P28482	YES	YES	MLTFNPHK	293	-0.623393	0.151513	-1.68892	0.695711	0.225964	0.0711567	-0.327637	0.103118	1.41092	-1.68892
MAPK1	Mitogen-activated protein kinase 1	P28482	YES	YES	GQVFDVGPR	16	-0.0525153	0.146986	0.0438346	0.139376	0.180782	0.882539	0.0697571	0.199407	1.9811	0.0438346
MAPK1	Mitogen-activated protein kinase 1	P28482	YES	YES	APTIEQMK	92	-0.0854177	0.0904729	-0.471086	0.522437	0.269541	0.535367	-0.0249535	0.0310347	2.44968	-0.471086
MAPK1	Mitogen-activated protein kinase 1	P28482	YES	YES	DLKPSNLLLNTTCDLKICDFGLAR	149	-0.103407	0.0671058	0.093033	0.0598075	-0.538994	0.618826	-0.848473	1.09623	0.79544	0.093033
MAPK1	Mitogen-activated protein kinase 1	P28482	YES	YES	APTIEQMKDVYIVQDLMETDLYK	92	0.190598	0.0561451	0.735116	0.255666	-0.131834	0.0382561	-0.198773	0.0540957	0.0402303	0.735116
MAPK1	Mitogen-activated protein kinase 1	P28482	YES	YES	ISPFEHQTYCQR	56	0.0233502	0.0500904	-0.0804608	0.130981	0.282457	1.05408	-0.0619956	0.151435	2.22797	-0.0804608
TYK2	Non-receptor tyrosine-protein kinase TYK2	P29597	YES	YES	ELGAALQGCLLR	528	-1.69404	1.0702	-0.197212	0.26369	-0.0774706	0.108352	0.131398	0.217944	0.022853	-0.197212
TYK2	Non-receptor tyrosine-protein kinase TYK2	P29597	YES	YES	AAALSFVSLVDGYFR	411	0.446185	0.786242	0.0858117	0.0922865	0.298903	0.56554	0.171672	0.263304	0.348669	0.0858117
TYK2	Non-receptor tyrosine-protein kinase TYK2	P29597	YES	YES	IGDFGLAK	1039	-1.03056	0.673425	-2.29789	2.25105	-3.04285	4.54847	-1.87156	2.31781	4.92578	-2.29789
TYK2	Non-receptor tyrosine-protein kinase TYK2	P29597	YES	YES	EITQLSHLGQGTR	588	-1.02235	0.62472	-0.41764	0.245372	0.0200212	0.0106556	-0.996351	0.748486	0.612475	-0.41764
TYK2	Non-receptor tyrosine-protein kinase TYK2	P29597	YES	YES	VPVCHLR	275	1.19422	0.54758	0.371342	0.190371	1.0921	0.604972	1.24608	0.609103	0.663052	0.371342
TYK2	Non-receptor tyrosine-protein kinase TYK2	P29597	YES	YES	CLELSLPSR	402	-0.543231	0.431729	-0.0440139	0.0248551	0.0123073	0.00715097	-0.243465	0.13328	0.0557682	-0.0440139
TYK2	Non-receptor tyrosine-protein kinase TYK2	P29597	YES	YES	SGWKQEIDILR	942	-0.166433	0.420705	0.27371	0.72838	0.24234	0.759004	0.149994	0.494831	0.681427	0.27371
TYK2	Non-receptor tyrosine-protein kinase TYK2	P29597	YES	YES	LGLAEGTSPFIK	745	-0.912238	0.401208	0.189351	0.0723942	0.91529	0.762314	-1.31454	0.704575	1.39403	0.189351
TYK2	Non-receptor tyrosine-protein kinase TYK2	P29597	YES	YES	DLGEGHFGKVSLYCYDPTNDGTGEMVAVK	902	0.584637	0.395021	1.00392	0.863979	1.42261	1.17698	1.01218	0.808812	0.197406	1.00392
TYK2	Non-receptor tyrosine-protein kinase TYK2	P29597	YES	YES	DGIHGPLLEPFVQAK	449	-0.365119	0.22028	-0.283213	0.0952773	-0.841323	0.399948	-0.348115	0.169081	0.31873	-0.283213
TYK2	Non-receptor tyrosine-protein kinase TYK2	P29597	YES	YES	SQAPDGMQSLR	491	0.375433	0.154927	-0.571036	0.259221	1.26009	1.25554	-0.0594199	0.0279573	0.861758	-0.571036
TYK2	Non-receptor tyrosine-protein kinase TYK2	P29597	YES	YES	MVVAQQLASALSYLENK	712	0.114711	0.130092	-0.126668	0.114819	-0.963892	1.55202	-0.640624	0.97425	1.85834	-0.126668
TYK2	Non-receptor tyrosine-protein kinase TYK2	P29597	YES	YES	LSDPGVGLGALSR	757	0.0400663	0.0165278	-0.497606	0.311017	0.552798	0.508102	-0.301929	0.224695	0.423735	-0.497606
CMPK1	UMP-CMP kinase	P30085	NO	YES	SVDEVFDEVVQIFDKEG	180	-5.5054	3.49102	0.0912261	0.335968	0.00554765	0.0166335	-0.519715	0.496687	0.345631	0.0912261
CMPK1	UMP-CMP kinase	P30085	NO	YES	IVEKYGYTHLSAGELLRDER	23	2.06486	1.02979	0.836531	0.256673	2.11551	1.05124	2.06725	1.02151	1.01506	0.836531
CMPK1	UMP-CMP kinase	P30085	NO	YES	SVDEVFDEVVQIFDK	180	-0.522317	0.662821	-0.0325422	0.0425006	-0.0687439	0.101695	-0.22013	0.358156	0.147369	-0.0325422
CMPK1	UMP-CMP kinase	P30085	NO	YES	KNPDSQYGELIEK	43	-0.137679	0.635695	-0.0162055	0.0874895	-0.0788207	0.718124	-0.0171721	0.134827	0.387794	-0.0162055
CMPK1	UMP-CMP kinase	P30085	NO	YES	FLIDGFPR	89	0.0914747	0.565008	0.0603817	0.251166	0.0966808	0.830664	0.138598	1.04682	0.409912	0.0603817
CMPK1	UMP-CMP kinase	P30085	NO	YES	RIQTYLQSTKPIIDLYEEMGK	151	0.169561	0.510644	-0.0134276	0.0308145	-0.113624	0.224523	-0.0470459	0.0695449	0.0569859	-0.0134276
CMPK1	UMP-CMP kinase	P30085	NO	YES	SDDNRESLEK	141	-0.522711	0.509624	0.0231337	0.0317664	0.0229031	0.023398	0.131785	0.219253	0.136572	0.0231337
CMPK1	UMP-CMP kinase	P30085	NO	YES	RIQTYLQSTKPIIDLYEEMGKVK	151	0.489953	0.472539	-0.775307	0.435072	-0.196578	0.128689	0.165832	0.12099	0.117768	-0.775307
CMPK1	UMP-CMP kinase	P30085	NO	YES	YGYTHLSAGELLRDER	27	0.0596485	0.393646	0.0871212	0.700416	0.0433309	0.348656	-0.00366438	0.027374	0.130835	0.0871212
CMPK1	UMP-CMP kinase	P30085	NO	YES	NKFLIDGFPR	87	0.0585176	0.352642	0.0994233	0.651047	0.0847759	0.589282	0.0750627	0.379901	0.412486	0.0994233
CMPK1	UMP-CMP kinase	P30085	NO	YES	MKPLVVFVLGGPGAGK	1	0.133103	0.299931	0.301814	0.995501	0.23775	0.686672	0.00568788	0.00954243	0.1301	0.301814
CMPK1	UMP-CMP kinase	P30085	NO	YES	NQDNLQGWNK	97	-0.0528549	0.266597	-0.00531679	0.0207156	0.0182125	0.104892	0.0440579	0.379125	0.0935879	-0.00531679
CMPK1	UMP-CMP kinase	P30085	NO	YES	REMDQTMAANAQK	74	-0.286759	0.224935	-1.01261	0.807853	-0.666097	0.501609	-0.238862	0.16064	0.42996	-1.01261
CMPK1	UMP-CMP kinase	P30085	NO	YES	SDDNRESLEKR	141	0.102024	0.219111	0.0273267	0.0452962	0.308666	0.732409	0.156089	0.277765	0.955213	0.0273267
CMPK1	UMP-CMP kinase	P30085	NO	YES	MKPLVVFVLGGPGAGKGTQCAR	1	-0.0814791	0.204747	0.0389399	0.0839016	0.0749361	0.180529	-0.114112	0.395364	0.367996	0.0389399
CMPK1	UMP-CMP kinase	P30085	NO	YES	FLIDGFPRNQDNLQGWNK	89	0.0977588	0.166234	0.236794	0.494146	0.391774	1.13882	0.119716	0.152402	0.0788653	0.236794
CMPK1	UMP-CMP kinase	P30085	NO	YES	EMDQTMAANAQK	75	0.0538094	0.162774	-0.0426534	0.0898158	0.0733264	0.287539	0.101748	0.35771	0.253732	-0.0426534
CMPK1	UMP-CMP kinase	P30085	NO	YES	ADVSFVLFFDCNNEICIER	112	-0.32576	0.158111	0.932154	0.370207	0.409155	0.254805	-0.997788	0.400266	0.135389	0.932154
CMPK1	UMP-CMP kinase	P30085	NO	YES	IQTYLQSTKPIIDLYEEMGK	152	0.0298782	0.138372	0.0288945	0.115005	0.02502	0.0938377	-0.0891576	0.538538	0.176292	0.0288945
CMPK1	UMP-CMP kinase	P30085	NO	YES	IVPVEITISLLKR	62	0.041552	0.134575	0.120542	0.788228	0.0930239	0.763207	0.00923381	0.0509026	0.422811	0.120542
CMPK1	UMP-CMP kinase	P30085	NO	YES	KPLVVFVLGGPGAGK	2	-0.112929	0.112478	-0.141613	0.179083	-0.0921115	0.0995936	-0.262277	0.385926	0.176244	-0.141613
CMPK1	UMP-CMP kinase	P30085	NO	YES	IQTYLQSTKPIIDLYEEMGKVK	152	0.0173227	0.081285	-0.0131879	0.0390305	-0.0158148	0.0674508	-0.114471	0.819701	0.285292	-0.0131879
CMPK1	UMP-CMP kinase	P30085	NO	YES	NPDSQYGELIEK	44	-0.0503287	0.0773038	0.0768368	0.177182	0.114044	0.400906	0.0242304	0.0653155	0.223475	0.0768368
CMPK1	UMP-CMP kinase	P30085	NO	YES	IVPVEITISLLK	62	-0.0279285	0.0536712	0.183911	0.524657	0.00208639	0.00508713	0.0897674	0.25539	0.116536	0.183911
CMPK1	UMP-CMP kinase	P30085	NO	YES	YGYTHLSAGELLR	27	-0.00570406	0.021493	0.127135	0.656954	0.0168236	0.072251	0.0793456	0.316433	0.149398	0.127135
WEE1	Wee1-like protein kinase	P30291	YES	YES	IGSGEFGSVFK	305	-0.558719	0.947742	-0.0567249	0.127175	-0.612006	1.89165	-2.462	1.93161	4.62767	-0.0567249
WEE1	Wee1-like protein kinase	P30291	YES	YES	YIHSMSLVHMDIKPSNIFISR	416	-0.644228	0.931507	-0.606415	0.798706	-0.398429	0.701318	-0.813787	0.896511	1.00479	-0.606415
WEE1	Wee1-like protein kinase	P30291	YES	YES	DLLLQVGR	405	-0.306105	0.550805	-0.13483	0.309077	-0.821528	3.22743	-1.53164	5.41904	5.87937	-0.13483
WEE1	Wee1-like protein kinase	P30291	YES	YES	IGDLGHVTR	461	0.610868	0.343033	0.711193	0.421226	0.29029	0.156462	-0.581583	0.332558	0.993737	0.711193
WEE1	Wee1-like protein kinase	P30291	YES	YES	QTPQVNINPFTPDSLLLHSSGQCR	229	0.740357	0.249986	0.50232	0.203747	-0.473596	0.156542	0.160827	0.0529971	0.0649014	0.50232
WEE1	Wee1-like protein kinase	P30291	YES	YES	ISSPQVEEGDSR	470	0.218557	0.221226	-0.483044	0.608863	-0.896895	0.483777	-0.634122	1.04643	0.981624	-0.483044
WEE1	Wee1-like protein kinase	P30291	YES	YES	HSVLLSASR	566	0.232598	0.161026	-0.592848	0.314984	-1.35731	1.17545	-2.31137	1.7622	2.14069	-0.592848
WEE1	Wee1-like protein kinase	P30291	YES	YES	IPQVLSQEFTELLK	534	-0.0283418	0.107903	0.0273506	0.0613449	-0.0628651	0.183664	-0.0825619	0.408671	1.97527	0.0273506
WEE1	Wee1-like protein kinase	P30291	YES	YES	EAELKDLLLQVGR	400	0.121964	0.0622763	0.585161	0.415713	0.309347	0.171146	0.335321	0.203907	0.0380609	0.585161
WEE1	Wee1-like protein kinase	P30291	YES	YES	FLANEVLQENYTHLPK	482	0.0258602	0.0326923	0.338558	0.778472	-0.35392	0.625377	-1.48583	2.05692	2.39159	0.338558
PKLR	Pyruvate kinase PKLR	P30613	NO	YES	AAPLSRDPTEVTAIGAVEAAFK	444	1.41022	1.40642	0.631813	0.262579	1.25817	1.19673	0.664423	0.492177	0.277973	0.631813
PKLR	Pyruvate kinase PKLR	P30613	NO	YES	FGVEHGVDIVFASFVR	274	0.516171	1.03952	0.62647	1.29426	0.740679	1.83276	0.176175	0.272064	1.67057	0.62647
PKLR	Pyruvate kinase PKLR	P30613	NO	YES	SILIGAPGGPAGYLR	26	0.0983129	0.869684	0.106318	0.495055	0.180061	2.16317	0.0899928	0.908736	1.32967	0.106318
PKLR	Pyruvate kinase PKLR	P30613	NO	YES	LNFSHGSHEYHAESIANVR	117	-0.398886	0.443667	0.223078	0.249695	0.144994	0.170438	0.277359	0.393389	0.194954	0.223078
PKLR	Pyruvate kinase PKLR	P30613	NO	YES	GDLGIEIPAEKVFLAQK	338	0.101373	0.285177	-0.109621	0.322074	-0.148679	0.329576	-0.0757199	0.227077	0.0884161	-0.109621
PKLR	Pyruvate kinase PKLR	P30613	NO	YES	GNFPVEAVK	411	-0.42196	0.259381	0.116747	0.0690011	-0.256824	0.111276	0.234461	0.146244	0.426987	0.116747
PKLR	Pyruvate kinase PKLR	P30613	NO	YES	AALGPEGHGIK	299	-0.519649	0.228005	-0.358437	0.169219	0.76883	0.635595	-0.191021	0.0841143	0.642189	-0.358437
PKLR	Pyruvate kinase PKLR	P30613	NO	YES	STSIIATIGPASR	87	-0.0609891	0.189005	-0.053591	0.188245	0.0362992	0.139404	-0.0430236	0.13912	0.287476	-0.053591
PKLR	Pyruvate kinase PKLR	P30613	NO	YES	AAVIAVTR	491	0.571782	0.18399	1.34445	0.603542	-1.97409	0.459785	1.13211	0.480244	0.0753499	1.34445
PKLR	Pyruvate kinase PKLR	P30613	NO	YES	SIQENISSLQLR	2	-0.0271426	0.17005	0.129855	0.560203	0.0392327	0.303803	0.0671086	0.335304	0.00548847	0.129855
PKLR	Pyruvate kinase PKLR	P30613	NO	YES	SILIGAPGGPAGYLRR	26	-0.11097	0.161765	-0.0916303	0.111314	-0.061823	0.0846167	-0.186121	0.18657	0.0571797	-0.0916303
PKLR	Pyruvate kinase PKLR	P30613	NO	YES	VGDLVIVVTGWRPGSGYTNIMR	548	-0.220012	0.13847	-0.212995	0.24024	-0.0465272	0.0543456	-0.21651	0.28804	0.213183	-0.212995
PKLR	Pyruvate kinase PKLR	P30613	NO	YES	GVFPLLYR	511	-0.0891642	0.0864561	0.0635845	0.070866	0.365989	0.571389	0.466153	0.795904	0.621472	0.0635845
PKLR	Pyruvate kinase PKLR	P30613	NO	YES	EAEAAVYHR	427	-0.173502	0.0847813	0.333629	0.184964	-0.618171	0.389513	-0.138723	0.0660916	0.758598	0.333629
PKLR	Pyruvate kinase PKLR	P30613	NO	YES	GDLGIEIPAEK	338	-0.0228966	0.0794535	-0.102587	0.542223	-0.0990558	0.495648	0.0749194	0.361493	0.216057	-0.102587
PKLR	Pyruvate kinase PKLR	P30613	NO	YES	GNANTVWVDYPNIVR	195	0.208599	0.0604049	0.238036	0.0787912	-0.15857	0.046683	0.410055	0.146431	0.160974	0.238036
PKLR	Pyruvate kinase PKLR	P30613	NO	YES	RFDEILEVSDGIMVAR	322	0.0338055	0.0310539	-0.193872	0.305605	0.190661	0.354057	-0.00044812	0.000657293	0.378108	-0.193872
PKLR	Pyruvate kinase PKLR	P30613	NO	YES	KGVNLPGAQVDLPGLSEQDVR	250	-0.0379782	0.0202708	-0.615909	0.342089	-0.978177	0.489547	-0.435446	0.325869	0.880384	-0.615909
PKLR	Pyruvate kinase PKLR	P30613	NO	YES	CCAAAIIVLTTTGR	466	0.0208817	0.0198511	-0.315373	0.42225	0.0541345	0.0560496	0.0626008	0.0754391	0.0438308	-0.315373
AKT1	RAC-alpha serine/threonine-protein kinase	P31749	YES	YES	KLSPPFKPQVTSETDTR	420	-0.860518	1.02568	-0.198428	0.237799	-0.253859	0.332	-1.6921	1.38169	2.388	-0.198428
AKT1	RAC-alpha serine/threonine-protein kinase	P31749	YES	YES	EAPLNNFSVAQCQLMK	49	0.264307	0.9181	0.168332	0.435279	0.202428	0.663525	0.243095	0.844484	0.704451	0.168332
AKT1	RAC-alpha serine/threonine-protein kinase	P31749	YES	YES	EVIVAKDEVAHTLTENR	184	-0.407594	0.844366	0.0276494	0.048793	-0.15878	0.560824	-0.899871	2.94935	3.01273	0.0276494
AKT1	RAC-alpha serine/threonine-protein kinase	P31749	YES	YES	HPFLTALK	207	-0.390762	0.585702	0.0835221	0.177525	-0.0993234	0.254858	-1.36544	3.84474	5.00095	0.0835221
AKT1	RAC-alpha serine/threonine-protein kinase	P31749	YES	YES	FYGAEIVSALDYLHSEK	252	-0.255984	0.582971	0.0570954	0.283467	0.0220221	0.088412	-0.755948	4.82664	5.90211	0.0570954
AKT1	RAC-alpha serine/threonine-protein kinase	P31749	YES	YES	TFCGTPEYLAPEVLEDNDYGR	308	-0.351409	0.573811	-0.175494	0.381537	-0.285683	0.841561	-1.16298	4.95162	6.17774	-0.175494
AKT1	RAC-alpha serine/threonine-protein kinase	P31749	YES	YES	FFAGIVWQHVYEK	407	-0.338551	0.517244	0.0937475	0.291854	0.0770306	0.249407	-0.818009	2.46883	3.33051	0.0937475
AKT1	RAC-alpha serine/threonine-protein kinase	P31749	YES	YES	ITDFGLCK	290	-0.580059	0.492453	0.119271	0.143852	-0.34317	0.625845	-1.63279	3.24284	3.25121	0.119271
AKT1	RAC-alpha serine/threonine-protein kinase	P31749	YES	YES	SLLSGLLK	378	-0.198241	0.469669	0.136887	0.431284	0.121169	0.420292	-0.507428	2.10872	3.08009	0.136887
AKT1	RAC-alpha serine/threonine-protein kinase	P31749	YES	YES	KQEEEEMDFR	112	0.353756	0.439991	-0.225579	0.230303	0.239908	0.282211	-0.00793001	0.00779418	0.0163275	-0.225579
AKT1	RAC-alpha serine/threonine-protein kinase	P31749	YES	YES	TFHVETPEEREEWTTAIQTVADGLK	87	-0.151905	0.370438	-0.0541177	0.0906965	-0.274874	0.879956	-0.316392	1.19462	0.365359	-0.0541177
AKT1	RAC-alpha serine/threonine-protein kinase	P31749	YES	YES	HRVTMNEFEYLK	143	-0.281349	0.351359	-0.0803317	0.0980535	-0.250735	0.423014	-2.37714	2.5198	3.20589	-0.0803317
AKT1	RAC-alpha serine/threonine-protein kinase	P31749	YES	YES	LSPPFKPQVTSETDTR	421	-0.314014	0.340271	-0.290685	0.675372	-0.594523	0.801847	-1.435	3.64978	4.13342	-0.290685
AKT1	RAC-alpha serine/threonine-protein kinase	P31749	YES	YES	DLKLENLMLDKDGHIK	274	0.582919	0.326856	0.252761	0.15848	0.351528	0.184715	-0.347109	0.213061	0.499125	0.252761
AKT1	RAC-alpha serine/threonine-protein kinase	P31749	YES	YES	ERPQDVDQR	40	-0.251939	0.318771	-0.141845	0.271891	0.210601	0.530501	0.0429661	0.0763211	0.475839	-0.141845
AKT1	RAC-alpha serine/threonine-protein kinase	P31749	YES	YES	NDGTFIGYK	31	0.126119	0.303487	0.119083	0.311435	0.176344	0.501265	0.191269	0.516449	0.553976	0.119083
AKT1	RAC-alpha serine/threonine-protein kinase	P31749	YES	YES	FYGAEIVSALDYLHSEKNVVYR	252	-0.361292	0.289406	0.61856	0.913393	0.172213	0.157406	-1.6658	2.23245	2.34951	0.61856
AKT1	RAC-alpha serine/threonine-protein kinase	P31749	YES	YES	VTMNEFEYLK	145	0.0973409	0.238817	0.25141	0.768868	0.0402736	0.107635	-0.812017	3.41453	2.70901	0.25141
AKT1	RAC-alpha serine/threonine-protein kinase	P31749	YES	YES	YSFQTHDR	215	-0.408521	0.234574	0.659868	0.604779	-1.27542	0.779562	-1.5458	1.28109	1.01613	0.659868
AKT1	RAC-alpha serine/threonine-protein kinase	P31749	YES	YES	SGSPSDNSGAEEMEVSLAKPK	122	-0.382782	0.20997	0.0212567	0.0102952	-0.292416	0.163919	-0.873907	0.524202	0.18032	0.0212567
AKT1	RAC-alpha serine/threonine-protein kinase	P31749	YES	YES	YFLLKNDGTFIGYK	26	0.180167	0.205565	0.00647865	0.0062438	0.025162	0.0291574	-0.0217631	0.0146797	0.144834	0.00647865
AKT1	RAC-alpha serine/threonine-protein kinase	P31749	YES	YES	CLQWTTVIER	77	0.0598196	0.199535	0.0960945	0.315894	0.0461038	0.173878	0.0469001	0.208691	0.307259	0.0960945
AKT1	RAC-alpha serine/threonine-protein kinase	P31749	YES	YES	SDVAIVKEGWLHK	2	0.250381	0.195305	0.398315	0.245565	0.433894	0.341544	0.274305	0.17495	0.462711	0.398315
AKT1	RAC-alpha serine/threonine-protein kinase	P31749	YES	YES	FFAGIVWQHVYEKK	407	0.113929	0.0892807	0.297451	0.290952	0.489789	0.589885	-0.0826503	0.0711006	0.105669	0.297451
AKT1	RAC-alpha serine/threonine-protein kinase	P31749	YES	YES	RPHFPQFSYSASGTA	466	-0.0498162	0.0618762	0.338386	0.668963	0.404296	0.820754	0.270137	0.484427	0.403756	0.338386
AKT1	RAC-alpha serine/threonine-protein kinase	P31749	YES	YES	SDVAIVK	2	0.0148998	0.0419153	0.176675	0.754082	0.0951522	0.38537	0.0614431	0.243857	0.652982	0.176675
AKT1	RAC-alpha serine/threonine-protein kinase	P31749	YES	YES	DEVAHTLTENR	190	0.0173667	0.0156667	0.221524	0.413605	-0.055291	0.0739594	0.272374	0.371558	0.387664	0.221524
AKT1	RAC-alpha serine/threonine-protein kinase	P31749	YES	YES	TERPRPNTFIIR	65	0.00158622	0.000882588	0.568693	0.826603	0.287568	0.276933	0.0269782	0.0177597	0.0311465	0.568693
AKT2	RAC-beta serine/threonine-protein kinase	P31751	YES	YES	ITDFGLCKEGISDGATMK	291	-0.828632	1.06116	-0.578796	0.65985	-0.578841	0.868062	-1.85987	2.97234	2.08392	-0.578796
AKT2	RAC-beta serine/threonine-protein kinase	P31751	YES	YES	FFLSINWQDVVQK	408	-1.52564	1.02363	-1.0956	0.86286	-2.106	1.84117	-2.26555	2.03595	1.5506	-1.0956
AKT2	RAC-beta serine/threonine-protein kinase	P31751	YES	YES	LLPPFKPQVTSEVDTR	422	-1.98423	0.907982	0.32939	0.423935	-0.339441	0.457726	-2.55782	2.76166	2.82401	0.32939
AKT2	RAC-beta serine/threonine-protein kinase	P31751	YES	YES	AIQMVANSLK	102	-1.39528	0.878519	-1.31864	0.609825	-0.87923	0.422798	0.530343	0.585019	0.588901	-1.31864
AKT2	RAC-beta serine/threonine-protein kinase	P31751	YES	YES	ARFYGAEIVSALEYLHSR	252	-1.23757	0.832566	-1.48789	0.963579	-0.844309	0.502077	-1.32624	0.993112	1.91284	-1.48789
AKT2	RAC-beta serine/threonine-protein kinase	P31751	YES	YES	EVIIAKDEVAHTVTESR	186	-0.626646	0.669673	0.330252	0.248808	-0.675869	0.93559	-1.16705	1.1267	3.79018	0.330252
AKT2	RAC-beta serine/threonine-protein kinase	P31751	YES	YES	SLLAGLLK	379	-0.37573	0.63863	0.124901	0.338386	-0.36242	1.46267	-1.0405	3.68362	3.83548	0.124901
AKT2	RAC-beta serine/threonine-protein kinase	P31751	YES	YES	FFLSINWQDVVQKK	408	0.63969	0.35002	0.288504	0.145115	0.284378	0.162223	-0.437519	0.251432	0.482715	0.288504
AKT2	RAC-beta serine/threonine-protein kinase	P31751	YES	YES	THFPQFSYSASIRE	468	0.194148	0.324118	0.396058	0.737747	0.239897	0.366062	0.0238832	0.0297911	0.303609	0.396058
AKT2	RAC-beta serine/threonine-protein kinase	P31751	YES	YES	TFHVDSPDEREEWMR	87	-0.282924	0.195176	-0.325455	0.238657	-0.30359	0.258463	-0.198522	0.132016	0.197935	-0.325455
AKT2	RAC-beta serine/threonine-protein kinase	P31751	YES	YES	QRLGGGPSDAK	391	-0.0944595	0.191655	-0.0549346	0.139913	-1.00317	0.579301	-0.69819	1.35751	0.000867802	-0.0549346
AKT2	RAC-beta serine/threonine-protein kinase	P31751	YES	YES	NEVSVIK	2	-0.202216	0.137761	0.135846	0.101037	0.118317	0.0934901	-0.119116	0.0651639	0.106854	0.135846
AKT2	RAC-beta serine/threonine-protein kinase	P31751	YES	YES	FYGAEIVSALEYLHSR	254	0.0704439	0.0879081	0.19448	0.378952	-0.263351	0.616347	-1.39332	3.52872	6.02217	0.19448
AKT2	RAC-beta serine/threonine-protein kinase	P31751	YES	YES	APGEDPMDYK	114	0.0568434	0.0528249	0.481012	0.843019	0.751025	1.39108	0.379724	0.632212	0.82282	0.481012
AKT2	RAC-beta serine/threonine-protein kinase	P31751	YES	YES	AKVTMNDFDYLK	145	0.0190123	0.0155998	0.0948895	0.0803018	-0.677565	0.987793	-1.72079	2.19668	1.24704	0.0948895
GRK4	G protein-coupled receptor kinase 4	P32298	YES	YES	MELENIVANSLLLK	1	-0.827079	1.20248	0.213299	0.293027	0.176268	0.271206	0.158657	0.203231	0.520389	0.213299
TTK	Dual specificity protein kinase TTK	P33981	YES	YES	QSPPISTSK	435	-3.39415	1.88569	0.0775084	0.0229059	1.1908	0.591468	1.33544	0.675027	0.298503	0.0775084
TTK	Dual specificity protein kinase TTK	P33981	YES	YES	TPSSNTLDDYMSCFR	453	0.999556	1.14231	0.431619	0.398489	0.878206	1.32647	0.378127	0.405426	0.458592	0.431619
TTK	Dual specificity protein kinase TTK	P33981	YES	YES	LEETKEYQEPEVPESNQK	368	-1.06572	0.651711	-0.49243	0.274509	-0.557907	0.507891	-0.87308	0.59199	0.735041	-0.49243
TTK	Dual specificity protein kinase TTK	P33981	YES	YES	DLVVPGSKPSGNDSCELR	308	-0.260484	0.608898	0.0283847	0.0529277	-0.0223081	0.0407849	-0.0293831	0.0528748	0.0304792	0.0283847
TTK	Dual specificity protein kinase TTK	P33981	YES	YES	NEDLTDELSLNK	29	-0.87611	0.563252	-0.471327	0.280224	-0.0824625	0.0333162	-0.227521	0.149319	0.244237	-0.471327
TTK	Dual specificity protein kinase TTK	P33981	YES	YES	LHAIIDPNHEIEFPDIPEKDLQDVLK	744	-0.835113	0.557097	-0.267513	0.174515	-1.19991	1.10413	-1.08874	1.1217	1.31781	-0.267513
TTK	Dual specificity protein kinase TTK	P33981	YES	YES	ISIPELLAHPYVQIQTHPVNQMAK	780	-1.2131	0.545963	-1.29149	0.703565	-3.55653	1.98624	-1.47857	1.1294	1.59631	-1.29149
TTK	Dual specificity protein kinase TTK	P33981	YES	YES	NLNLQKK	186	-1.00416	0.503443	0.798555	0.925549	-1.52263	0.752464	0.22831	0.112191	0.359107	0.798555
TTK	Dual specificity protein kinase TTK	P33981	YES	YES	VPVNLLNSPDCDVK	274	-0.363701	0.474741	0.098054	0.145345	0.00234194	0.00306701	0.0892766	0.119485	0.237728	0.098054
TTK	Dual specificity protein kinase TTK	P33981	YES	YES	SVQNSHFKEPLVSDEK	329	-0.592665	0.43004	-0.480751	0.380064	0.0720215	0.0523677	-0.212874	0.147628	0.058008	-0.480751
TTK	Dual specificity protein kinase TTK	P33981	YES	YES	AIQEPDDAR	121	1.40513	0.415191	0.871506	0.269518	0.63286	0.152138	0.520185	0.110956	0.478778	0.871506
TTK	Dual specificity protein kinase TTK	P33981	YES	YES	HTTFEQPVFSVSK	422	-0.151557	0.384896	-0.216197	0.493785	-0.111949	0.281822	-0.0487484	0.120154	0.28289	-0.216197
TTK	Dual specificity protein kinase TTK	P33981	YES	YES	SSELIITDSITLK	345	-0.101799	0.378366	-0.00108911	0.00343631	-0.0325502	0.174973	-0.0903297	0.499029	0.258878	-0.00108911
TTK	Dual specificity protein kinase TTK	P33981	YES	YES	YVLGQLVGLNSPNSILK	811	0.108764	0.369018	0.108134	0.356684	0.259489	1.22643	0.200765	0.820379	0.708031	0.108134
TTK	Dual specificity protein kinase TTK	P33981	YES	YES	KSECINQNPAASSNHWQIPELAR	392	0.258562	0.317629	-0.286461	0.471228	0.047554	0.0708016	-0.210063	0.265683	0.534857	-0.286461
TTK	Dual specificity protein kinase TTK	P33981	YES	YES	NKTESSLLAK	358	-0.693496	0.314805	-0.0503497	0.0994951	0.000461123	0.000575765	0.132167	0.369539	0.438357	-0.0503497
TTK	Dual specificity protein kinase TTK	P33981	YES	YES	NSVPLSDALLNK	75	-0.0927704	0.29686	-0.0227825	0.0540116	-0.0321399	0.0916025	0.117586	0.559624	0.0960081	-0.0227825
TTK	Dual specificity protein kinase TTK	P33981	YES	YES	NLSASTVLTAQESFSGSLGHLQNR	202	-0.62543	0.26443	0.498864	0.720469	0.266448	0.29453	-0.312595	0.185039	0.200952	0.498864
TTK	Dual specificity protein kinase TTK	P33981	YES	YES	GAVPLEMLEIALR	173	0.0535206	0.229178	0.0407474	0.101605	0.122438	0.617777	0.166851	1.13093	0.392676	0.0407474
TTK	Dual specificity protein kinase TTK	P33981	YES	YES	AIQEPDDARDYFQMAR	121	0.120245	0.120669	-0.130136	0.166047	-0.0408633	0.0413604	0.0280751	0.0317484	0.0418358	-0.130136
TTK	Dual specificity protein kinase TTK	P33981	YES	YES	FKNEDLTDELSLNK	27	-0.0600224	0.116118	0.0863743	0.215047	0.105733	0.377227	0.0616299	0.194354	0.190941	0.0863743
TTK	Dual specificity protein kinase TTK	P33981	YES	YES	NSVPLSDALLNKLIGR	75	-0.204682	0.115013	0.793353	0.48786	0.74597	0.514283	0.13602	0.0503284	0.820504	0.793353
TTK	Dual specificity protein kinase TTK	P33981	YES	YES	EYQEPEVPESNQK	373	-0.0493708	0.0837504	-0.0276093	0.0532578	-0.069792	0.125503	0.0439805	0.105312	0.0470725	-0.0276093
TTK	Dual specificity protein kinase TTK	P33981	YES	YES	YVNLEEADNQTLDSYRNEIAYLNK	554	-0.12404	0.0751358	-0.89663	0.766726	-0.990259	0.753084	-0.946344	0.902054	0.252179	-0.89663
TTK	Dual specificity protein kinase TTK	P33981	YES	YES	ELTIDSIMNK	10	0.0187249	0.0447637	-0.0455044	0.119762	0.016768	0.0480343	0.161467	0.63214	0.112096	-0.0455044
TTK	Dual specificity protein kinase TTK	P33981	YES	YES	LIDFGIANQMQPDTTSVVK	662	-0.0886597	0.0368937	-1.01578	0.705192	-1.27315	1.12678	-1.46279	1.31325	1.06889	-1.01578
TTK	Dual specificity protein kinase TTK	P33981	YES	YES	MESEDLSGR	1	-0.0883109	0.0316722	0.783382	0.336016	-0.268725	0.0907873	-0.897021	0.368675	0.122072	0.783382
TTK	Dual specificity protein kinase TTK	P33981	YES	YES	QLLSEEEKK	193	0.0709864	0.0285686	0.327579	0.131994	0.866712	0.717544	0.361917	0.173871	0.49527	0.327579
TTK	Dual specificity protein kinase TTK	P33981	YES	YES	QSCPFGR	267	0.0467731	0.0167804	0.503952	0.286673	-0.778039	0.302284	-0.362675	0.107608	0.627652	0.503952
GRK3	G protein-coupled receptor kinase 3	P35626	YES	YES	FYATEIILGLEHMHNR	296	1.49886	1.14442	0.297695	0.128477	1.32085	1.08621	1.03172	0.630289	0.0154744	0.297695
MAP2K2	Dual specificity mitogen-activated protein kinase kinase 2	P36507	YES	YES	LQGTHYSVQSDIWSMGLSLVELAVGRYPIPPPDAK	239	1.1995	1.21231	1.09562	1.24565	0.753449	0.728477	0.304887	0.163376	0.197749	1.09562
MAP2K2	Dual specificity mitogen-activated protein kinase kinase 2	P36507	YES	YES	SEVEEVDFAGWLCK	372	0.185414	0.931216	0.455167	2.74623	0.540769	3.5771	0.503129	3.47636	3.94463	0.455167
MAP2K2	Dual specificity mitogen-activated protein kinase kinase 2	P36507	YES	YES	RIPEEILGK	164	-0.507557	0.842074	-0.590493	1.45422	-0.37509	0.589329	-0.800977	1.68331	1.06299	-0.590493
MAP2K2	Dual specificity mitogen-activated protein kinase kinase 2	P36507	YES	YES	RSEVEEVDFAGWLCK	371	0.155448	0.771491	0.435227	2.91545	0.492302	3.71882	0.422262	2.90745	3.67382	0.435227
MAP2K2	Dual specificity mitogen-activated protein kinase kinase 2	P36507	YES	YES	MLTNHTFIK	362	0.418121	0.747858	0.262495	0.677108	0.287792	1.29011	0.383706	1.62757	2.75055	0.262495
MAP2K2	Dual specificity mitogen-activated protein kinase kinase 2	P36507	YES	YES	ISELGAGNGGVVTK	75	-0.157136	0.642926	-0.210454	2.55856	-0.367804	3.31586	-0.478231	4.29395	3.90828	-0.210454
MAP2K2	Dual specificity mitogen-activated protein kinase kinase 2	P36507	YES	YES	VGELKDDDFER	64	-0.100065	0.468335	-0.14006	1.07571	-0.401205	3.29406	-0.458376	3.99829	4.53993	-0.14006
MAP2K2	Dual specificity mitogen-activated protein kinase kinase 2	P36507	YES	YES	VQHRPSGLIMAR	89	0.0777955	0.423563	-0.0587972	0.24055	-0.228196	1.73891	-0.28669	2.26851	2.93406	-0.0587972
MAP2K2	Dual specificity mitogen-activated protein kinase kinase 2	P36507	YES	YES	RKPVLPALTINPTIAEGPSPTSEGASEANLVDLQK	5	-0.234507	0.409262	0.192654	0.14293	-0.466408	0.836671	-0.533721	0.950701	0.116232	0.192654
MAP2K2	Dual specificity mitogen-activated protein kinase kinase 2	P36507	YES	YES	KLEELELDEQQKK	40	-0.0809616	0.299298	0.0880503	0.286309	-0.0205478	0.0736064	0.00567193	0.0198639	0.0282453	0.0880503
MAP2K2	Dual specificity mitogen-activated protein kinase kinase 2	P36507	YES	YES	AKVGELKDDDFER	62	0.095473	0.214064	-0.17441	0.434398	-0.437107	1.56802	-0.821337	2.62534	2.76773	-0.17441
MAP2K2	Dual specificity mitogen-activated protein kinase kinase 2	P36507	YES	YES	LNQPGTPTR	389	0.0919802	0.202479	0.364059	1.28398	0.574423	2.33077	0.596875	2.13096	1.7207	0.364059
MAP2K2	Dual specificity mitogen-activated protein kinase kinase 2	P36507	YES	YES	MLTNHTFIKR	362	-0.102096	0.166041	0.459953	1.46852	0.378824	1.08201	0.663294	2.18494	1.77829	0.459953
MAP2K2	Dual specificity mitogen-activated protein kinase kinase 2	P36507	YES	YES	KLEELELDEQQK	40	-0.0958424	0.12285	0.0351768	0.0470832	-0.120097	0.189838	0.0175187	0.0231705	0.751373	0.0351768
MAP2K2	Dual specificity mitogen-activated protein kinase kinase 2	P36507	YES	YES	SYMAPER	232	0.380814	0.109815	1.59148	1.10342	1.15155	0.420255	1.47171	0.514633	0.767373	1.59148
CSK	Tyrosine-protein kinase CSK	P41240	YES	YES	NCWHLDAAMRPSFLQLR	421	-0.363822	0.772014	-0.162189	0.428097	-0.460714	1.34775	-0.926938	2.48186	1.73545	-0.162189
CSK	Tyrosine-protein kinase CSK	P41240	YES	YES	GGLYIVTEYMAK	260	0.2113	0.606086	-0.0582996	0.173107	-0.327336	1.09168	-0.377428	1.13946	1.42194	-0.0582996
CSK	Tyrosine-protein kinase CSK	P41240	YES	YES	NVLVSEDNVAK	319	-0.343496	0.577082	0.016157	0.0362913	-0.217997	0.808609	-0.360603	1.27306	1.56488	0.016157
CSK	Tyrosine-protein kinase CSK	P41240	YES	YES	CIKNDATAQAFLAEASVMTQLR	223	-0.802677	0.541883	0.0964279	0.0931879	-0.363567	0.621304	-0.866085	1.52524	0.514515	0.0964279
CSK	Tyrosine-protein kinase CSK	P41240	YES	YES	GSLVDYLR	272	-0.121172	0.481427	-0.017671	0.0522381	-0.399063	2.02779	-0.529604	3.1391	3.02552	-0.017671
CSK	Tyrosine-protein kinase CSK	P41240	YES	YES	WTAPEALR	352	-0.133989	0.472894	-0.0608305	0.229664	-0.0599721	0.250208	-0.226207	0.855923	1.11674	-0.0608305
CSK	Tyrosine-protein kinase CSK	P41240	YES	YES	FSLDVCEAMEYLEGNNFVHR	294	0.607996	0.405004	-0.282033	0.109258	0.155196	0.0785625	0.823534	0.490696	0.0872917	-0.282033
CSK	Tyrosine-protein kinase CSK	P41240	YES	YES	VSDFGLTK	330	-0.110232	0.390919	-0.0616796	0.195434	-0.561722	2.99935	-0.547443	2.12918	1.59242	-0.0616796
CSK	Tyrosine-protein kinase CSK	P41240	YES	YES	EASSTQDTGKLPVK	338	-0.261944	0.326835	-0.0469782	0.0424138	-0.761338	1.36379	-1.91773	2.88523	2.16607	-0.0469782
CSK	Tyrosine-protein kinase CSK	P41240	YES	YES	LSLMPWFHGK	77	-0.194323	0.306389	-0.201097	0.299877	-0.241472	0.393375	-0.281564	0.514575	0.396495	-0.201097
CSK	Tyrosine-protein kinase CSK	P41240	YES	YES	SAIQAAWPSGTECIAK	2	-0.180423	0.25701	-0.167702	0.292573	-0.446452	1.07444	-0.454519	1.04346	0.249793	-0.167702
CSK	Tyrosine-protein kinase CSK	P41240	YES	YES	EGIIPANYVQKR	57	0.280937	0.242769	0.5605	0.69483	0.306933	0.303877	0.424759	0.4819	0.30572	0.5605
CSK	Tyrosine-protein kinase CSK	P41240	YES	YES	YNFHGTAEQDLPFCKGDVLTIVAVTKDPNWYK	18	-0.280602	0.240048	-1.44686	1.49654	-0.506331	0.563785	-0.610349	0.571674	1.56425	-1.44686
CSK	Tyrosine-protein kinase CSK	P41240	YES	YES	LLYPPETGLFLVR	95	-0.0916643	0.237493	-0.254975	0.741298	-0.307437	1.16887	-0.274532	0.806355	1.54693	-0.254975
CSK	Tyrosine-protein kinase CSK	P41240	YES	YES	SVLGGDCLLKFSLDVCEAMEYLEGNNFVHR	284	-0.314161	0.208971	0.248767	0.161792	0.447595	0.280242	0.631983	0.569492	0.631002	0.248767
CSK	Tyrosine-protein kinase CSK	P41240	YES	YES	IPLKDVVPR	390	0.212215	0.161568	-1.07062	0.413829	-2.03043	2.12088	-2.87988	3.10897	4.34512	-1.07062
CSK	Tyrosine-protein kinase CSK	P41240	YES	YES	LLQTIGKGEFGDVMLGDYR	197	-0.136403	0.160775	0.0377375	0.0379374	-0.208612	0.258288	-0.484148	1.0065	0.520398	0.0377375
CSK	Tyrosine-protein kinase CSK	P41240	YES	YES	SVLGGDCLLK	284	-0.0352042	0.0959728	-0.048506	0.193249	-0.402523	2.66822	-0.466295	2.10793	3.69689	-0.048506
CSK	Tyrosine-protein kinase CSK	P41240	YES	YES	SGWALNMK	186	-0.056227	0.0913578	-0.250911	0.787302	-0.432026	1.58366	-0.310408	1.15748	2.25283	-0.250911
CSK	Tyrosine-protein kinase CSK	P41240	YES	YES	EQLEHIK	438	0.0830516	0.0440309	-0.294951	0.161558	0.0324579	0.0165442	-0.368527	0.170233	0.604805	-0.294951
CSK	Tyrosine-protein kinase CSK	P41240	YES	YES	VMEGTVAAQDEFYR	172	0.0745773	0.0341985	-0.350954	0.148623	-0.651569	0.375841	-0.523241	0.245267	0.143368	-0.350954
CSK	Tyrosine-protein kinase CSK	P41240	YES	YES	HSNLVQLLGVIVEEK	245	0.011838	0.0159726	0.152537	0.28216	-0.365424	0.75627	-0.592117	1.12719	1.37759	0.152537
PRKCI	Protein kinase C iota type	P41743	YES	YES	HVFEQASNHPFLVGLHSCFQTESR	304	-0.492012	0.810894	-2.09323	2.35663	-2.80897	2.68897	-1.36031	0.962125	1.70677	-2.09323
PRKCI	Protein kinase C iota type	P41743	YES	YES	LGCHPQTGFADIQGHPFFR	505	-0.889437	0.637657	-1.39511	2.75573	-1.61085	3.50109	-1.47926	3.45314	3.84968	-1.39511
PRKCI	Protein kinase C iota type	P41743	YES	YES	FYSAEISLALNYLHER	357	-0.646758	0.628662	-1.02668	2.13054	-1.18564	3.2447	-1.72438	2.55397	3.94381	-1.02668
PRKCI	Protein kinase C iota type	P41743	YES	YES	ASSSLGLQDFDLLR	245	-0.424972	0.528802	-1.27758	3.49665	-1.55196	4.70076	-2.05775	4.13736	5.06336	-1.27758
PRKCI	Protein kinase C iota type	P41743	YES	YES	KIDQSEFEGFEYINPLLMSAEECV	573	-0.213941	0.257505	-0.130648	0.138834	-0.445131	0.752185	-0.638437	0.956938	0.730736	-0.130648
PRKCI	Protein kinase C iota type	P41743	YES	YES	DSSTMSHTVAGGGSGDHSHQVR	6	0.142116	0.170932	-0.14729	0.173896	-0.0119047	0.0139611	-0.18456	0.318121	0.0600795	-0.14729
PRKCI	Protein kinase C iota type	P41743	YES	YES	GDIMITHFEPSISFEGLCNEVR	34	-0.0535403	0.116314	0.0164901	0.0469264	0.147448	0.683583	-0.044866	0.172553	0.0980058	0.0164901
PRKCI	Protein kinase C iota type	P41743	YES	YES	LVTIECGR	185	0.0880484	0.1139	-1.14455	0.795255	0.0922822	0.162167	0.328254	0.687892	0.58134	-1.14455
PRKCI	Protein kinase C iota type	P41743	YES	YES	WIDEEGDPCTVSSQLELEEAFR	70	-0.0194944	0.0337698	-0.0158976	0.0260762	0.0305221	0.0454473	0.0221125	0.0352133	0.0604451	-0.0158976
PRKCI	Protein kinase C iota type	P41743	YES	YES	DMCSFDNEQLFTMK	56	-0.0165568	0.0147945	0.0742088	0.0837423	0.20077	0.219807	0.268916	0.256274	0.42306	0.0742088
PIK3CA	Phosphatidylinositol 4,5-bisphosphate 3-kinase catalytic subunit alpha isoform	P42336	NO	YES	SMLLSSEQLK	231	1.29835	0.602239	0.719872	0.237868	1.49883	0.73657	0.557416	0.15413	0.837305	0.719872
PIK3CA	Phosphatidylinositol 4,5-bisphosphate 3-kinase catalytic subunit alpha isoform	P42336	NO	YES	WNEWLNYDIYIPDLPR	383	-0.837617	0.540949	-0.317164	0.332897	-0.250559	0.180479	-2.2065	1.50839	1.98213	-0.317164
PIK3CA	Phosphatidylinositol 4,5-bisphosphate 3-kinase catalytic subunit alpha isoform	P42336	NO	YES	VCGCDEYFLEKYPLSQYK	254	-0.560053	0.476099	0.159658	0.198537	-0.554702	0.424921	-0.588336	0.859042	1.11677	0.159658
PIK3CA	Phosphatidylinositol 4,5-bisphosphate 3-kinase catalytic subunit alpha isoform	P42336	NO	YES	ISTATPYMNGETSTK	311	0.559217	0.370948	-0.0743076	0.047752	0.351216	0.307591	0.601996	0.655406	0.0431893	-0.0743076
PIK3CA	Phosphatidylinositol 4,5-bisphosphate 3-kinase catalytic subunit alpha isoform	P42336	NO	YES	EAGFSYSHAGLSNR	503	0.112214	0.170242	0.295273	0.529326	0.0964129	0.128812	0.131769	0.245466	0.340879	0.295273
PIK3CA	Phosphatidylinositol 4,5-bisphosphate 3-kinase catalytic subunit alpha isoform	P42336	NO	YES	LARDNELR	517	0.0913343	0.0368382	-0.000609041	0.000249411	1.33075	0.791438	1.07276	0.504695	0.481705	-0.000609041
PIK3CB	Phosphatidylinositol 4,5-bisphosphate 3-kinase catalytic subunit beta isoform	P42338	NO	YES	MYEQEMIAIEAAINR	292	1.51563	2.18077	1.03202	1.69387	0.366621	0.374118	0.51844	0.453415	0.092178	1.03202
PIK3CB	Phosphatidylinositol 4,5-bisphosphate 3-kinase catalytic subunit beta isoform	P42338	NO	YES	MLPYGCLATGDR	836	-1.04912	1.09198	-0.967752	1.57867	-0.426204	0.93998	-0.800089	2.05054	1.02942	-0.967752
PIK3CB	Phosphatidylinositol 4,5-bisphosphate 3-kinase catalytic subunit beta isoform	P42338	NO	YES	GLHEFDSLKDPEVNEFR	133	-0.596258	1.01731	-0.0188395	0.0233348	-0.362956	0.680924	-0.709054	0.846212	0.418861	-0.0188395
PIK3CB	Phosphatidylinositol 4,5-bisphosphate 3-kinase catalytic subunit beta isoform	P42338	NO	YES	QDMLTLQMLR	812	-1.25536	0.805259	0.228289	0.284144	-0.0769172	0.0505832	-0.328602	0.358033	0.25659	0.228289
PIK3CB	Phosphatidylinositol 4,5-bisphosphate 3-kinase catalytic subunit beta isoform	P42338	NO	YES	EALELLDFNYPDQYVR	605	-0.758484	0.773934	-0.27949	0.375419	-0.104171	0.169274	-1.11113	1.44375	2.47144	-0.27949
PIK3CB	Phosphatidylinositol 4,5-bisphosphate 3-kinase catalytic subunit beta isoform	P42338	NO	YES	LMDLLWK	822	1.60328	0.675144	-0.832115	0.234525	-0.345418	0.0996473	0.392192	0.123596	0.0449233	-0.832115
PIK3CB	Phosphatidylinositol 4,5-bisphosphate 3-kinase catalytic subunit beta isoform	P42338	NO	YES	KFLPVLK	533	0.186726	0.659515	0.234653	0.760534	-0.0297453	0.0935397	-0.0885525	0.282917	1.03081	0.234653
PIK3CB	Phosphatidylinositol 4,5-bisphosphate 3-kinase catalytic subunit beta isoform	P42338	NO	YES	TIVSSEVSGKNDHIWNEPLEFDINICDLPR	367	0.832351	0.48007	0.334764	0.152952	0.752312	0.433697	0.350439	0.155387	0.220313	0.334764
PIK3CB	Phosphatidylinositol 4,5-bisphosphate 3-kinase catalytic subunit beta isoform	P42338	NO	YES	VFGEDSVGVIFK	794	-0.119789	0.42101	-0.00320856	0.00874286	-0.068711	0.252248	-0.462923	2.41067	2.54197	-0.00320856
PIK3CB	Phosphatidylinositol 4,5-bisphosphate 3-kinase catalytic subunit beta isoform	P42338	NO	YES	VEYVFGDHPLIQFQYIR	254	-0.56022	0.374545	-0.304973	0.250668	-0.318238	0.40527	-0.690794	1.41977	1.15261	-0.304973
PIK3CB	Phosphatidylinositol 4,5-bisphosphate 3-kinase catalytic subunit beta isoform	P42338	NO	YES	QCCEDAYLILRR	984	0.530404	0.346434	0.387137	0.219452	0.238314	0.0992092	-1.07366	0.766712	0.0291795	0.387137
PIK3CB	Phosphatidylinositol 4,5-bisphosphate 3-kinase catalytic subunit beta isoform	P42338	NO	YES	ERVPFILTYDFIHVIQQGK	954	-0.3353	0.339277	0.136978	0.182136	-0.0151304	0.0170613	-0.273295	0.480078	0.510437	0.136978
PIK3CB	Phosphatidylinositol 4,5-bisphosphate 3-kinase catalytic subunit beta isoform	P42338	NO	YES	EALSDLQSPLNPCVILSELYVEK	753	-0.188398	0.339208	0.00308947	0.00418725	0.0705669	0.120093	-0.456239	0.939174	0.626724	0.00308947
PIK3CB	Phosphatidylinositol 4,5-bisphosphate 3-kinase catalytic subunit beta isoform	P42338	NO	YES	NGDDLRQDMLTLQMLR	806	-0.440435	0.331697	-0.42636	0.310123	0.0709417	0.0473922	-0.0831149	0.0733385	0.605531	-0.42636
PIK3CB	Phosphatidylinositol 4,5-bisphosphate 3-kinase catalytic subunit beta isoform	P42338	NO	YES	EILDRDPLSQLCENEMDLIWTLR	540	-0.273	0.29891	0.214843	0.184923	-0.72271	0.650926	-0.114134	0.108997	0.751285	0.214843
PIK3CB	Phosphatidylinositol 4,5-bisphosphate 3-kinase catalytic subunit beta isoform	P42338	NO	YES	KTGQLFHIDFGHILGNFK	929	-0.245733	0.289478	-0.168667	0.212345	-0.0901365	0.103413	-0.344681	0.522167	0.713367	-0.168667
PIK3CB	Phosphatidylinositol 4,5-bisphosphate 3-kinase catalytic subunit beta isoform	P42338	NO	YES	AAEIASSDSANVSSR	515	-0.121052	0.288842	-0.0769931	0.249274	0.0416915	0.189979	-0.148678	0.864496	1.22583	-0.0769931
PIK3CB	Phosphatidylinositol 4,5-bisphosphate 3-kinase catalytic subunit beta isoform	P42338	NO	YES	EYAVGCLR	621	-0.1025	0.278949	-0.0731474	0.183682	-0.109132	0.302865	-0.511308	1.57406	2.17721	-0.0731474
PIK3CB	Phosphatidylinositol 4,5-bisphosphate 3-kinase catalytic subunit beta isoform	P42338	NO	YES	HGNLFITLFALMLTAGLPELTSVKDIQYLK	996	0.271785	0.274263	-0.895848	1.05483	-0.0100716	0.00807544	-0.0385645	0.0307157	0.212116	-0.895848
PIK3CB	Phosphatidylinositol 4,5-bisphosphate 3-kinase catalytic subunit beta isoform	P42338	NO	YES	ALPHFILVECCK	277	-0.201853	0.246616	0.103667	0.11535	0.115401	0.154884	-0.0805281	0.107812	0.72965	0.103667
PIK3CB	Phosphatidylinositol 4,5-bisphosphate 3-kinase catalytic subunit beta isoform	P42338	NO	YES	EIFPQSLPK	567	-0.302802	0.225287	0.181356	0.0897217	-0.65421	0.486847	-0.768536	0.490891	0.330025	0.181356
PIK3CB	Phosphatidylinositol 4,5-bisphosphate 3-kinase catalytic subunit beta isoform	P42338	NO	YES	MKPLWLVYNNK	783	-0.181287	0.186167	-0.11231	0.108198	0.0753	0.0906468	-0.6103	0.81513	1.64732	-0.11231
PIK3CB	Phosphatidylinositol 4,5-bisphosphate 3-kinase catalytic subunit beta isoform	P42338	NO	YES	TGQLFHIDFGHILGNFK	930	-0.190305	0.154601	0.198342	0.222232	-0.206733	0.265331	-0.963354	1.2561	1.11083	0.198342
PIK3CB	Phosphatidylinositol 4,5-bisphosphate 3-kinase catalytic subunit beta isoform	P42338	NO	YES	RIGQFLFWHLR	669	-0.178055	0.141553	0.0850184	0.0625747	0.157384	0.134794	-0.745837	0.69571	0.597221	0.0850184
PIK3CB	Phosphatidylinositol 4,5-bisphosphate 3-kinase catalytic subunit beta isoform	P42338	NO	YES	VPFILTYDFIHVIQQGK	956	-0.0678314	0.0917126	0.214925	0.325197	0.131822	0.221607	-0.172778	0.264927	0.695749	0.214925
PIK3CB	Phosphatidylinositol 4,5-bisphosphate 3-kinase catalytic subunit beta isoform	P42338	NO	YES	TINPSKYQTIR	419	-0.0337475	0.0435899	0.249112	0.448796	-0.000926409	0.00108946	-0.243342	0.320318	0.0382583	0.249112
PIK3CB	Phosphatidylinositol 4,5-bisphosphate 3-kinase catalytic subunit beta isoform	P42338	NO	YES	YEPFLDCALSR	648	0.0141152	0.024568	0.121431	0.282253	-0.120558	0.293521	-0.711534	1.64059	1.69786	0.121431
PIK3CB	Phosphatidylinositol 4,5-bisphosphate 3-kinase catalytic subunit beta isoform	P42338	NO	YES	LCDVRPFLPVLK	99	-0.00870815	0.010206	-0.000234036	0.000270537	-0.0906616	0.129087	-0.246874	0.352324	0.258001	-0.000234036
PIK3CB	Phosphatidylinositol 4,5-bisphosphate 3-kinase catalytic subunit beta isoform	P42338	NO	YES	IGQFLFWHLR	670	-0.00393835	0.00756114	0.0247127	0.0427419	0.0767892	0.194183	-0.196571	0.583082	0.957974	0.0247127
MTOR	Serine/threonine-protein kinase mTOR	P42345	YES	YES	DLMEEKFDQVCQWVLK	364	0.708749	1.71369	0.233394	0.425572	0.374469	0.822784	0.53189	1.3373	0.754157	0.233394
MTOR	Serine/threonine-protein kinase mTOR	P42345	YES	YES	MDTNKDDPELMLGR	1467	-1.19743	1.30146	-0.191602	0.268201	-0.671206	1.12326	-0.235149	0.224345	0.597615	-0.191602
MTOR	Serine/threonine-protein kinase mTOR	P42345	YES	YES	IHGALLILNELVR	261	0.34701	1.26211	0.115273	0.209556	0.0902375	0.257587	0.065012	0.17241	0.210962	0.115273
MTOR	Serine/threonine-protein kinase mTOR	P42345	YES	YES	TRTDSYSAGQSVEILDGVELGEPAHK	2444	-0.967409	1.01152	-1.08152	1.39408	-0.808732	0.786746	-0.617129	0.648905	0.96633	-1.08152
MTOR	Serine/threonine-protein kinase mTOR	P42345	YES	YES	NSLIQMTILNLLPR	385	-1.02404	0.966034	0.0685243	0.110135	0.351371	0.906154	0.279312	0.735128	1.18614	0.0685243
MTOR	Serine/threonine-protein kinase mTOR	P42345	YES	YES	DASAVSLSESK	911	0.150247	0.878013	-0.0584131	0.208851	0.0661895	0.297515	0.056987	0.314572	0.0851807	-0.0584131
MTOR	Serine/threonine-protein kinase mTOR	P42345	YES	YES	QVALWTLGQLVASTGYVVEPYRK	838	-0.801142	0.815408	0.199767	0.160279	-0.20727	0.157818	0.13785	0.0877623	0.112221	0.199767
MTOR	Serine/threonine-protein kinase mTOR	P42345	YES	YES	IVEDWQK	1629	-0.920903	0.814293	-1.89153	2.63875	-1.28226	1.86261	-0.452442	0.672471	0.601509	-1.89153
MTOR	Serine/threonine-protein kinase mTOR	P42345	YES	YES	FYDQLNHHIFELVSSSDANER	63	0.297109	0.787047	0.299176	0.962751	0.0775599	0.144937	0.292352	0.757916	0.0437598	0.299176
MTOR	Serine/threonine-protein kinase mTOR	P42345	YES	YES	DLLDAELTAMAGESYSR	1569	0.751165	0.714618	1.08425	1.489	0.181839	0.148242	0.770826	0.876418	0.822452	1.08425
MTOR	Serine/threonine-protein kinase mTOR	P42345	YES	YES	DIQDGLLK	534	0.215282	0.689602	-0.399593	0.539678	-0.449878	0.693963	-0.161316	0.226973	0.229508	-0.399593
MTOR	Serine/threonine-protein kinase mTOR	P42345	YES	YES	LAAFRPSAFTDTQYLQDTMNHVLSCVKK	399	-0.572625	0.636107	0.0083119	0.0051023	-0.0183253	0.0123247	-0.493044	0.40764	0.0350836	0.0083119
MTOR	Serine/threonine-protein kinase mTOR	P42345	YES	YES	ELQHYVTMELR	43	0.133345	0.586904	0.0198649	0.0713487	0.0499414	0.266095	-0.000685107	0.00252592	0.168544	0.0198649
MTOR	Serine/threonine-protein kinase mTOR	P42345	YES	YES	ERTAAFQALGLLSVAVR	429	-0.616931	0.575987	-0.141321	0.193869	-0.112994	0.187292	-0.177812	0.301036	0.074544	-0.141321
MTOR	Serine/threonine-protein kinase mTOR	P42345	YES	YES	LIRPYMEPILK	767	0.256403	0.571842	-0.021186	0.0281648	-0.0705636	0.116192	0.0626028	0.122371	0.26624	-0.021186
MTOR	Serine/threonine-protein kinase mTOR	P42345	YES	YES	AMQVDATVFTCISMLAR	475	0.612132	0.556781	0.0603514	0.0350641	0.617335	0.53611	-0.315291	0.149835	0.343579	0.0603514
MTOR	Serine/threonine-protein kinase mTOR	P42345	YES	YES	DLFNAAFVSCWSELNEDQQDELIR	1316	-0.29952	0.448374	-0.103573	0.0976462	-0.246731	0.503077	-0.47426	0.857732	0.470931	-0.103573
MTOR	Serine/threonine-protein kinase mTOR	P42345	YES	YES	NLLPSNDPVVMEMASK	113	0.27462	0.443476	0.0891816	0.105117	0.149976	0.228196	0.0286266	0.0290039	0.127064	0.0891816
MTOR	Serine/threonine-protein kinase mTOR	P42345	YES	YES	RVSKDDWLEWLR	1274	-0.696926	0.441458	0.178138	0.277128	-1.06719	0.887092	-0.236001	0.436349	0.829661	0.178138
MTOR	Serine/threonine-protein kinase mTOR	P42345	YES	YES	SCWALAQAYNPMAR	1302	0.222082	0.435713	-0.0109677	0.0188607	0.143883	0.319381	0.100889	0.234094	0.0806413	-0.0109677
MTOR	Serine/threonine-protein kinase mTOR	P42345	YES	YES	AALETVDRLTESLDFTDYASR	1134	-0.166311	0.430156	-0.0853293	0.106082	-0.132132	0.341374	-0.33089	0.937796	0.0389533	-0.0853293
MTOR	Serine/threonine-protein kinase mTOR	P42345	YES	YES	DDWLEWLR	1278	-0.26401	0.408083	-0.808086	1.4241	-0.459896	0.572529	-0.0633479	0.0922955	0.869776	-0.808086
MTOR	Serine/threonine-protein kinase mTOR	P42345	YES	YES	LLTPSIHLISGHAHVVSQTAVQVVADVLSK	629	1.16173	0.381636	0.959047	0.267194	-0.358061	0.107243	-0.919108	0.322716	0.0928552	0.959047
MTOR	Serine/threonine-protein kinase mTOR	P42345	YES	YES	ALEWLGADRNEGR	152	-0.20351	0.362466	-0.502867	1.04924	0.0104075	0.0204316	-0.441803	0.391667	0.684914	-0.502867
MTOR	Serine/threonine-protein kinase mTOR	P42345	YES	YES	AVLALHQDLFSLAQQCIDK	1548	-0.522809	0.35848	-0.240261	0.1126	-0.0986716	0.0621383	-0.0834197	0.0537775	0.235213	-0.240261
MTOR	Serine/threonine-protein kinase mTOR	P42345	YES	YES	HTFEEAEKGFDETLAK	236	-0.245916	0.356799	-0.402575	0.627016	-0.2413	0.593523	-0.376073	0.831345	0.634805	-0.402575
MTOR	Serine/threonine-protein kinase mTOR	P42345	YES	YES	ELAICTVGR	709	0.0761768	0.339347	0.102435	0.457565	0.0791846	0.31786	0.100839	0.443577	0.0990999	0.102435
MTOR	Serine/threonine-protein kinase mTOR	P42345	YES	YES	HCADHFLNSEHKEIR	605	-0.238035	0.339154	0.0935021	0.122293	-0.408152	0.573324	-0.213668	0.322623	0.286966	0.0935021
MTOR	Serine/threonine-protein kinase mTOR	P42345	YES	YES	LGEWQLNLQGINESTIPK	1754	0.392223	0.336761	-0.214089	0.158454	-0.0696545	0.0537538	-0.341807	0.296433	0.388854	-0.214089
MTOR	Serine/threonine-protein kinase mTOR	P42345	YES	YES	ELEFQKGPTPAILESLISINNK	1401	0.190254	0.332217	0.166885	0.129504	0.300082	0.658234	0.106809	0.172748	0.0282115	0.166885
MTOR	Serine/threonine-protein kinase mTOR	P42345	YES	YES	LHEWEDALVAYDKK	1453	0.793656	0.326658	0.444288	0.169125	0.729963	0.299434	0.909678	0.399892	0.498488	0.444288
MTOR	Serine/threonine-protein kinase mTOR	P42345	YES	YES	TLLMYTVPAVQGFFR	1876	0.139927	0.320127	-0.176478	0.416703	0.0388854	0.0753152	0.0858687	0.217949	0.0229139	-0.176478
MTOR	Serine/threonine-protein kinase mTOR	P42345	YES	YES	ACLILTTQREPK	215	-0.061069	0.316298	0.0115419	0.0530433	0.0120369	0.0662109	-0.110211	0.732772	0.0796756	0.0115419
MTOR	Serine/threonine-protein kinase mTOR	P42345	YES	YES	LSLELLKDSSSPSLR	1287	1.14837	0.314032	-0.404378	0.113987	-0.0123364	0.00372421	-1.03147	0.350527	0.028466	-0.404378
MTOR	Serine/threonine-protein kinase mTOR	P42345	YES	YES	TLGSFEFEGHSLTQFVR	588	0.0992619	0.294662	0.117167	0.374159	0.0631378	0.128384	-0.261504	0.440716	0.263065	0.117167
MTOR	Serine/threonine-protein kinase mTOR	P42345	YES	YES	YQIFIPMVNK	1188	0.754824	0.281891	1.0352	0.477682	-0.544816	0.189463	0.38258	0.116222	1.06382	1.0352
MTOR	Serine/threonine-protein kinase mTOR	P42345	YES	YES	VLGLLGALDPYKHK	887	0.19403	0.28113	-0.0728304	0.0864767	-0.117655	0.170101	-0.276659	0.356113	0.679529	-0.0728304
MTOR	Serine/threonine-protein kinase mTOR	P42345	YES	YES	LHVSTINLQK	1258	0.331378	0.275979	0.239039	0.20832	0.660268	0.755484	0.689875	0.780758	0.786267	0.239039
MTOR	Serine/threonine-protein kinase mTOR	P42345	YES	YES	AYGAMVSCHMLSELEEVIQYK	1586	0.359051	0.274422	-0.176221	0.267081	-0.0209344	0.0336918	-0.264275	0.486122	0.524833	-0.176221
MTOR	Serine/threonine-protein kinase mTOR	P42345	YES	YES	LSSMNPAFVMPFLR	718	0.160872	0.261981	-0.0735063	0.0999313	0.255196	0.584186	0.205786	0.445023	0.0868247	-0.0735063
MTOR	Serine/threonine-protein kinase mTOR	P42345	YES	YES	LSSMNPAFVMPFLRK	718	0.139253	0.243999	-0.0814397	0.117128	0.125635	0.173086	-0.027931	0.0404459	0.0743615	-0.0814397
MTOR	Serine/threonine-protein kinase mTOR	P42345	YES	YES	GLAHQLASPGLTTLPEASDVGSITLALR	560	-0.131967	0.235132	0.20088	0.346394	-0.162841	0.201378	-0.554948	0.934181	0.40251	0.20088
MTOR	Serine/threonine-protein kinase mTOR	P42345	YES	YES	VMQLFGLVNTLLANDPTSLRK	2198	-0.209349	0.232679	-0.0284726	0.0304386	0.201159	0.271617	-0.135512	0.173127	0.111917	-0.0284726
MTOR	Serine/threonine-protein kinase mTOR	P42345	YES	YES	GGILAIASLIGVEGGNATR	85	-0.13416	0.230422	-0.184952	0.299828	0.0314528	0.0449421	-0.176454	0.274216	0.386637	-0.184952
MTOR	Serine/threonine-protein kinase mTOR	P42345	YES	YES	YDVLICR	1209	0.0686662	0.223065	-0.21663	0.574673	-0.0812543	0.246816	0.0804966	0.249623	0.158637	-0.21663
MTOR	Serine/threonine-protein kinase mTOR	P42345	YES	YES	LAAFRPSAFTDTQYLQDTMNHVLSCVK	399	0.13946	0.212191	0.0593246	0.0784587	0.161326	0.285982	-0.047286	0.0703621	0.175479	0.0593246
MTOR	Serine/threonine-protein kinase mTOR	P42345	YES	YES	LTESLDFTDYASR	1142	0.360496	0.20887	0.176967	0.0923725	0.467143	0.255167	1.01076	0.778916	0.638168	0.176967
MTOR	Serine/threonine-protein kinase mTOR	P42345	YES	YES	KGGILAIASLIGVEGGNATR	84	-0.0384962	0.199716	0.0400115	0.179564	-0.0885123	0.555499	-0.0594024	0.400372	0.160273	0.0400115
MTOR	Serine/threonine-protein kinase mTOR	P42345	YES	YES	HAAVLVLR	166	0.0415531	0.191649	0.035404	0.0968886	0.0184532	0.0708985	-0.0308717	0.162639	0.587144	0.035404
MTOR	Serine/threonine-protein kinase mTOR	P42345	YES	YES	FDQVCQWVLK	370	0.433297	0.18757	-0.912942	0.382683	-1.00676	0.422543	-0.15183	0.0469897	0.143125	-0.912942
MTOR	Serine/threonine-protein kinase mTOR	P42345	YES	YES	LLVVGITDPDPDIR	659	0.0615818	0.184285	0.0808721	0.309302	0.0133754	0.0421869	-0.088207	0.288088	0.206786	0.0808721
MTOR	Serine/threonine-protein kinase mTOR	P42345	YES	YES	TAAFQALGLLSVAVR	431	0.0444831	0.182966	0.0197199	0.0508266	0.0279519	0.111687	0.0872972	0.380065	0.0596532	0.0197199
MTOR	Serine/threonine-protein kinase mTOR	P42345	YES	YES	LFDAPEAPLPSR	1121	0.0756542	0.1798	-0.0470881	0.0831631	-0.0731767	0.201487	-0.071375	0.150008	0.245437	-0.0470881
MTOR	Serine/threonine-protein kinase mTOR	P42345	YES	YES	QIPQLKK	527	0.292402	0.175846	0.534934	0.391737	0.547408	0.37688	-0.0675819	0.0261297	0.0850618	0.534934
MTOR	Serine/threonine-protein kinase mTOR	P42345	YES	YES	LREEMEEITQQQLVHDKYCK	282	0.143944	0.166497	0.300104	0.441367	0.211444	0.342362	-0.174354	0.177763	0.189527	0.300104
MTOR	Serine/threonine-protein kinase mTOR	P42345	YES	YES	EMQKPQWYR	227	0.136633	0.161099	-0.0178223	0.017811	0.379217	0.823884	0.308852	0.599165	0.186426	-0.0178223
MTOR	Serine/threonine-protein kinase mTOR	P42345	YES	YES	AVLALHQDLFSLAQQCIDKAR	1548	-0.0902296	0.149677	0.0398556	0.0619622	-0.0806409	0.128185	-0.917053	1.74202	0.813671	0.0398556
MTOR	Serine/threonine-protein kinase mTOR	P42345	YES	YES	MLIQILTELEHSGIGR	733	-0.187011	0.147157	0.0215391	0.0121785	-0.157489	0.108099	-0.678398	0.461873	0.040013	0.0215391
MTOR	Serine/threonine-protein kinase mTOR	P42345	YES	YES	KLHVSTINLQK	1257	0.122373	0.137024	0.353045	0.576771	0.279673	0.446853	0.0402176	0.0403553	0.242996	0.353045
MTOR	Serine/threonine-protein kinase mTOR	P42345	YES	YES	YAVIPLSTNSGLIGWVPHCDTLHALIR	2225	0.0997296	0.136396	-0.652496	0.402764	0.352881	0.665244	-0.325578	0.288467	0.046742	-0.652496
MTOR	Serine/threonine-protein kinase mTOR	P42345	YES	YES	QVALWTLGQLVASTGYVVEPYR	838	-0.0847194	0.122655	0.124489	0.208332	0.209962	0.391568	-0.190237	0.308884	0.0796566	0.124489
MTOR	Serine/threonine-protein kinase mTOR	P42345	YES	YES	SLVVSPHEDMR	1641	-0.29019	0.115419	-0.809713	0.48371	-0.440414	0.334025	-0.915022	0.560131	0.512943	-0.809713
MTOR	Serine/threonine-protein kinase mTOR	P42345	YES	YES	SGQGDALASGPVETGPMKK	1239	0.0826279	0.111452	0.0366887	0.0379794	-0.242655	0.31691	0.0967348	0.160469	0.397775	0.0366887
MTOR	Serine/threonine-protein kinase mTOR	P42345	YES	YES	VSKDDWLEWLR	1275	0.126272	0.106917	0.480263	0.608992	0.574893	0.925874	0.556634	0.800756	0.564603	0.480263
MTOR	Serine/threonine-protein kinase mTOR	P42345	YES	YES	SGQGDALASGPVETGPMK	1239	0.0628851	0.104288	-0.105863	0.296022	-0.143473	0.430716	-0.191541	0.602001	0.208026	-0.105863
MTOR	Serine/threonine-protein kinase mTOR	P42345	YES	YES	LAMAGDTFTAEYVEFEVKR	133	0.0442039	0.102303	-0.0101895	0.0207891	0.00550571	0.012271	-0.127871	0.329435	0.0486534	-0.0101895
MTOR	Serine/threonine-protein kinase mTOR	P42345	YES	YES	ISSMEGER	274	-0.0675332	0.0970511	-0.504257	0.972835	0.0428224	0.0470944	-0.0326062	0.0331234	0.631853	-0.504257
MTOR	Serine/threonine-protein kinase mTOR	P42345	YES	YES	TLVLLLGVDPSR	1672	-0.0241687	0.0957636	-0.0281499	0.0640622	-0.101717	0.695669	-0.200861	0.626284	0.848166	-0.0281499
MTOR	Serine/threonine-protein kinase mTOR	P42345	YES	YES	AMGPGIQQDIK	492	-0.0443154	0.0932086	0.0790302	0.193371	0.104769	0.296447	0.0222213	0.0519758	0.30316	0.0790302
MTOR	Serine/threonine-protein kinase mTOR	P42345	YES	YES	HCADHFLNSEHK	605	0.101469	0.0930603	-0.114377	0.135994	-0.0191294	0.0234818	-0.00216774	0.00239348	0.146118	-0.114377
MTOR	Serine/threonine-protein kinase mTOR	P42345	YES	YES	RLSLELLK	1286	-0.416006	0.0917199	-0.19797	0.0451171	1.10437	0.298512	0.211496	0.0549946	0.383674	-0.19797
MTOR	Serine/threonine-protein kinase mTOR	P42345	YES	YES	DDRIHGALLILNELVR	258	-0.064204	0.0893828	0.131084	0.245036	-0.0452892	0.0891513	0.0448421	0.0777733	0.0532773	0.131084
MTOR	Serine/threonine-protein kinase mTOR	P42345	YES	YES	DLMGFGTKPR	302	-0.233686	0.0881889	-0.0356512	0.0149743	1.24873	1.63877	0.782472	0.676668	0.13565	-0.0356512
MTOR	Serine/threonine-protein kinase mTOR	P42345	YES	YES	VLGLLGALDPYK	887	0.031743	0.0880351	-0.0319272	0.0717836	-0.0536296	0.144316	0.0372343	0.111439	0.556649	-0.0319272
MTOR	Serine/threonine-protein kinase mTOR	P42345	YES	YES	MLGTGPAAATTAATTSSNVSVLQQFASGLK	1	-0.0449786	0.0875587	-0.0398584	0.0749194	0.00546261	0.0113097	-0.157549	0.448308	0.229346	-0.0398584
[truncated: 87,482 more rows]

## Sheet: B dose-response curves
Genes	ProteinDescriptions	UniProtIds	IsKinase		Sequences	Sequence start position	Ratio_STU treatment vs Vehicle						EC50 (uM)	R2	lower	upper
			KinHub	Uniprot			0nM vs. 0nM	20nM vs. 0nM	200nM vs. 0nM	2uM vs. 0nM	20uM vs. 0nM	100uM vs. 0nM
CDC7	Cell division cycle 7-related protein kinase	O00311	YES	YES	FVQSEAQQER	213	1	1.02718	0.630358	0.75539	0.792188	0.738419	0.0555656	0.8788	0.729088	1.01364
CDC7	Cell division cycle 7-related protein kinase	O00311	YES	YES	LYEAVPQLSNVFK	47	1	0.546485	0.151708	0.175614	0.191779	0.123783	0.01921	0.9957	0.160692	0.999989
PIK3CD	Phosphatidylinositol 4	O00329	NO	YES	DVPLALMACALR	211	1	1.0981	0.762351	1.16047	1.22496	1.06322	0.832606	0.4411	0.953527	1.15013
PIK3CD	Phosphatidylinositol 4	O00329	NO	YES	DVPLALMACALRK	211	1	1.04811	0.800327	1.19794	1.05689	1.42259	24.0398	0.5686	0.972692	1.47683
PIK3CD	Phosphatidylinositol 4	O00329	NO	YES	SKNPGEALDR	861	1	1.42411	0.62233	1.15551	0.985512	0.666001	37.2265	0.2602	0.639956	1.05027
PIK3CD	Phosphatidylinositol 4	O00329	NO	YES	FEGSEESFTFQVSTK	196	1	0.843571	0.917238	0.731457	1.08837	0.985444	1.49361	0.0779	0.824087	1.00259
PIK3CD	Phosphatidylinositol 4	O00329	NO	YES	RLCDVQPFLPVLR	88	1	0.688914	0.659222	0.836959	0.355021	0.36272	18.2917	0.739	-0.0414345	0.982755
EEF2K	Eukaryotic elongation factor 2 kinase	O00418	YES	YES	ASAVALEVQR	499	1	0.981227	1.01914	1.11641	0.970569	1.12549	2.02353	0.2565	0.990002	1.10093
EEF2K	Eukaryotic elongation factor 2 kinase	O00418	YES	YES	LTPQAFSHFTFER	253	1	1.01653	1.04713	1.04867	1.07969	0.989677	2.24576	0.1891	1.07234	1.00013
EEF2K	Eukaryotic elongation factor 2 kinase	O00418	YES	YES	QSMILVAR	611	1	1.05789	1.0129	1.006	1.11761	1.09295	4.73827	0.7978	1.01859	1.10516
EEF2K	Eukaryotic elongation factor 2 kinase	O00418	YES	YES	EAEMLFTGGYGLEKDPQR	671	1	0.999836	1.03453	1.05689	0.984166	0.915034	23.538	0.8024	0.914463	1.02282
EEF2K	Eukaryotic elongation factor 2 kinase	O00418	YES	YES	ICESMGLAPFDLSPR	317	1	1.09734	0.887441	1.06399	1.09339	0.999336	24335.7	0.0225	1.102	1.00339
EEF2K	Eukaryotic elongation factor 2 kinase	O00418	YES	YES	MASQPFGR	133	1	0.901915	0.774067	0.89951	0.909992	0.705137	3.49646	0.4784	0.661309	1.00055
EEF2K	Eukaryotic elongation factor 2 kinase	O00418	YES	YES	YSSSGSPANSFHFK	69	1	0.993361	1.08015	1.00548	1.05858	1.09441	2.50613	0.4732	0.996071	1.10292
EEF2K	Eukaryotic elongation factor 2 kinase	O00418	YES	YES	VHLAMVR	526	1	1.33344	1.14612	1.17679	1.1778	1.0944	52.9852	0.0715	1.08865	1.16711
EEF2K	Eukaryotic elongation factor 2 kinase	O00418	YES	YES	LNALDLEK	509	1	0.999699	1.09982	0.846083	1.18944	1.19333	5.3709	0.629	0.986379	1.19129
EEF2K	Eukaryotic elongation factor 2 kinase	O00418	YES	YES	AFDSGQNLSPDR	619	1	1.00282	0.91238	0.909697	1.01007	1.03588	15.4989	0.4333	0.956148	1.03545
EEF2K	Eukaryotic elongation factor 2 kinase	O00418	YES	YES	SGDLYTQAAEAAMEAMK	689	1	1.32449	0.926392	1.00588	0.98862	1.03692	0.0699391	0.4	0.989541	1.16225
EEF2K	Eukaryotic elongation factor 2 kinase	O00418	YES	YES	ADEDLIFR	2	1	1.28748	1.07753	1.30556	1.14784	1.1885	209705	0.4797	1.40443	0.998553
EEF2K	Eukaryotic elongation factor 2 kinase	O00418	YES	YES	YNSNSGFVR	239	1	1.05049	0.569939	0.749367	0.876889	0.813795	0.0548012	0.648	0.75251	1.02537
EEF2K	Eukaryotic elongation factor 2 kinase	O00418	YES	YES	ADEDLIFRLEGVDGGQSPR	2	1	1.05787	1.04791	0.780173	0.768662	0.821597	0.644473	0.963	0.790127	1.03527
EEF2K	Eukaryotic elongation factor 2 kinase	O00418	YES	YES	LANQYYQK	708	1	0.678979	0.990775	0.768688	1.10214	1.25139	18.0427	0.6512	0.859575	1.25125
EEF2K	Eukaryotic elongation factor 2 kinase	O00418	YES	YES	VCVEKWNLLNSSR	481	1	0.877311	1.01282	1.04159	1.0276	1.18539	12.5712	0.6483	0.952709	1.20435
EEF2K	Eukaryotic elongation factor 2 kinase	O00418	YES	YES	QVDIMQMCIIELK	206	1	0.928821	0.975819	0.865567	1.09495	1.09282	10.3075	0.7434	0.942564	1.09517
EEF2K	Eukaryotic elongation factor 2 kinase	O00418	YES	YES	HMPDPWAEFHLEDIATER	94	1	0.653555	1.23731	0.901204	0.688447	0.899066	2.35516	0.151	0.963543	0.793739
EEF2K	Eukaryotic elongation factor 2 kinase	O00418	YES	YES	HRYNAVTGEWLDDEVLIK	115	1	0.795238	0.354189	0.513525	1.10872	1.39329	18.2502	0.6665	0.665741	1.39352
EEF2K	Eukaryotic elongation factor 2 kinase	O00418	YES	YES	RGELDDPEPR	448	1	1.09458	1.04175	1.0182	0.974944	1.13953	2.9941	0.1266	0.999939	1.10748
EEF2K	Eukaryotic elongation factor 2 kinase	O00418	YES	YES	LWGEEYNR	193	1	1.01652	1.04253	0.681115	0.938309	1.02361	142.353	0.0431	0.84254	1.00332
EEF2K	Eukaryotic elongation factor 2 kinase	O00418	YES	YES	YYSNLTK	59	1	0.796829	1.0776	0.992696	0.802602	1.16876	42.5499	0.4159	0.933943	1.16876
EEF2K	Eukaryotic elongation factor 2 kinase	O00418	YES	YES	GMALFFYSHACNR	304	1	1.02558	1.09981	1.22156	1.20446	1.26504	0.272514	0.9692	1.00338	1.24069
EEF2K	Eukaryotic elongation factor 2 kinase	O00418	YES	YES	YNSNSGFVRDDNIR	239	1	0.919576	0.590714	0.796144	0.60136	0.638818
EEF2K	Eukaryotic elongation factor 2 kinase	O00418	YES	YES	GASNYVAKR	163	1	0.307793	0.720735	0.492131	0.914713	0.574932	28.414	0.3835	0.978794	0.233737
PIK3C2A	Phosphatidylinositol 4-phosphate 3-kinase C2 domain-containing subunit alpha	O00443	NO	YES	SLSVATVTR	327	1	1.04309	1.13297	0.922297	0.839584	0.988962	1.07978	0.597	0.91468	1.05865
PIK3C2A	Phosphatidylinositol 4-phosphate 3-kinase C2 domain-containing subunit alpha	O00443	NO	YES	TADVTSLFGGEDTSR	614	1	1.09059	1.09892	1.06489	1.12647	1.05328
PIK3C2A	Phosphatidylinositol 4-phosphate 3-kinase C2 domain-containing subunit alpha	O00443	NO	YES	GFELSSSTR	54	1	0.900414	0.829194	1.09765	0.98453	0.956065	0.608154	0.3794	0.909858	1.0127
PIK3C2A	Phosphatidylinositol 4-phosphate 3-kinase C2 domain-containing subunit alpha	O00443	NO	YES	FSGLPSNDEPILSFSPK	1398	1	1.10322	0.733117	0.994865	0.775426	0.615581	19.3405	0.5829	0.615029	0.957768
PIK3C2A	Phosphatidylinositol 4-phosphate 3-kinase C2 domain-containing subunit alpha	O00443	NO	YES	LSIIFPLWK	1473	1	0.765032	0.843238	1.25282	1.0318	1.16088	0.555755	0.686	0.869109	1.14851
PIK3C2A	Phosphatidylinositol 4-phosphate 3-kinase C2 domain-containing subunit alpha	O00443	NO	YES	IASTSEFLK	230	1	1.17739	1.0689	1.69338	0.967018	1.06454
PIK3C2A	Phosphatidylinositol 4-phosphate 3-kinase C2 domain-containing subunit alpha	O00443	NO	YES	LLLDDSFETK	103	1	1.38579	1.42939	1.56882	1.06312	1.47434	2.85388e+10	0.4551	1.76701	0.999305
PIK3C2A	Phosphatidylinositol 4-phosphate 3-kinase C2 domain-containing subunit alpha	O00443	NO	YES	VSLPLFDFKR	791	1	0.928965	0.944958	0.958071	0.999501	0.966457	4.38464	0.2001	0.957862	0.982982
PIK3C2A	Phosphatidylinositol 4-phosphate 3-kinase C2 domain-containing subunit alpha	O00443	NO	YES	FNFFIHNLAQLR	1386	1	1.26512	1.14563	1.24292	1.16431	1.04884	60.4791	0.2004	1.02481	1.16443
PIK3C2A	Phosphatidylinositol 4-phosphate 3-kinase C2 domain-containing subunit alpha	O00443	NO	YES	TNPGYLLSPVTAQR	402	1	1.19252	1.33862	1.31917	1.66414	1.31934	0.0424668	0.6839	1.00104	1.46897
PIK3C2A	Phosphatidylinositol 4-phosphate 3-kinase C2 domain-containing subunit alpha	O00443	NO	YES	VSNLQVSPK	253	1	0.824659	1.33535	1.03843	1.53816	1.36123	1.31946	0.5451	0.948288	1.48226
PIK3C2A	Phosphatidylinositol 4-phosphate 3-kinase C2 domain-containing subunit alpha	O00443	NO	YES	AQISSNSGFKECPSSHPEPTR	2	1	0.793164	0.932918	1.03894	0.986091	0.942198	0.229009	0.288	0.896598	0.989146
PIK3C2A	Phosphatidylinositol 4-phosphate 3-kinase C2 domain-containing subunit alpha	O00443	NO	YES	LVQLLGGVAEK	1052	1	0.86658	0.806055	1.00278	1.07742	0.796376	1.52764e+13	0.0982	0.999191	0.821322
PIK3C2A	Phosphatidylinositol 4-phosphate 3-kinase C2 domain-containing subunit alpha	O00443	NO	YES	HPVEELLDSYHNQVELALQIENQHR	548	1	1.07675	0.992733	0.674347	0.201044	0.901296	1.5673	0.5364	0.551188	1.02319
PIK3C2A	Phosphatidylinositol 4-phosphate 3-kinase C2 domain-containing subunit alpha	O00443	NO	YES	LSIIFPLWKLPGFPNR	1473	1	1.19668	1.44922	1.65623	1.11827	1.75045	0.0289762	0.4954	1.00078	1.50446
PIK3C2A	Phosphatidylinositol 4-phosphate 3-kinase C2 domain-containing subunit alpha	O00443	NO	YES	ARTDLEITDSK	242	1	0.978917	0.547896	0.278882	0.737439	1.15038	2.71707	0.1069	0.999759	0.477721
PIK3C2A	Phosphatidylinositol 4-phosphate 3-kinase C2 domain-containing subunit alpha	O00443	NO	YES	DALQPQTTDAEATIFFTR	1356	1	0.744404	0.248388	0.376366	0.392698	0.426397	1.33864e+10	0.7203	1.00296	-1.30341
PIK3C2A	Phosphatidylinositol 4-phosphate 3-kinase C2 domain-containing subunit alpha	O00443	NO	YES	SEDISKFDWLDLDPLSKPK	262	1	0.824655	1.26501	0.852711	1.21312	1.11685	5.47068	0.1498	0.967128	1.19317
PIK3C2A	Phosphatidylinositol 4-phosphate 3-kinase C2 domain-containing subunit alpha	O00443	NO	YES	ENFFLGGVTLPLKDFNLSK	1654	1	0.339327	0.872968	0.305164	0.353988	0.527823
PLK4	Serine/threonine-protein kinase PLK4	O00444	YES	YES	LSLSSVLDHPFMSR	254	1	1.7757	1.34643	2.33116	1.82408	1.14374	4316.16	0.3139	2.36917	1.00012
STK25	Serine/threonine-protein kinase 25	O00506	YES	YES	ADIWSLGITAIELAK	196	1	1.07998	0.7647	0.591023	0.515443	0.513991	0.189704	0.977	0.540114	1.04002
STK25	Serine/threonine-protein kinase 25	O00506	YES	YES	TSFLTELIDR	277	1	1.08059	0.677318	0.500864	0.38251	0.469913	0.178549	0.9748	0.451081	1.04032
STK25	Serine/threonine-protein kinase 25	O00506	YES	YES	KTSFLTELIDR	276	1	1.04026	0.792884	0.752609	0.593123	0.692537	0.157065	0.9102	0.679233	1.02052
STK25	Serine/threonine-protein kinase 25	O00506	YES	YES	AANVLLSEQGDVK	143	1	0.986582	0.880259	0.622993	0.588212	0.518529	0.503151	0.9911	0.545753	1.00068
STK25	Serine/threonine-protein kinase 25	O00506	YES	YES	GTALHSSQKPAEPVKR	336	1	1.0982	0.884117	0.981051	1.08658	0.923434	3.73452	0.0219	0.966093	1.01367
STK25	Serine/threonine-protein kinase 25	O00506	YES	YES	SQCLSTLVRPVFGELK	355	1	1.70636	2.75934	1.28537	2.97411	2.42293	0.197582	0.467	0.99496	3.14021
PDXK	Pyridoxal kinase	O00764	NO	YES	VVPLADIITPNQFEAELLSGR	140	1	1.04628	1.13642	0.968501	0.965007	0.91405	1.55854	0.6383	0.939409	1.06086
CIT	Citron Rho-interacting kinase	O14578	YES	YES	LIDFLQAK	1222	1	0.79603	0.989789	1.01132	1.01417	0.979161	0.133975	0.3867	0.898018	1.00157
CIT	Citron Rho-interacting kinase	O14578	YES	YES	LLELETR	851	1	0.900273	0.872459	0.953007	1.02613	0.96585	2.23132	0.3635	0.924259	0.996001
CIT	Citron Rho-interacting kinase	O14578	YES	YES	SLLEQDLATYITECSSLKR	501	1	1.03147	1.06202	1.02169	0.968142	1.02724	2.73989	0.2677	0.997774	1.03124
CIT	Citron Rho-interacting kinase	O14578	YES	YES	WVTALESVVAGGR	1554	1	0.735814	1.06092	0.966279	1.14553	1.09361	1.30045	0.4216	0.901531	1.12386
CIT	Citron Rho-interacting kinase	O14578	YES	YES	LAANSSLFTQR	790	1	1.07827	1.06576	1.06798	1.14633	1.109	0.0913587	0.7821	0.999378	1.15014
CIT	Citron Rho-interacting kinase	O14578	YES	YES	QQIAMSAIVR	1312	1	1.09928	1.21982	1.00017	1.07882	1.16935	3.85954	0.2724	1.22591	1.00092
CIT	Citron Rho-interacting kinase	O14578	YES	YES	AQEEMISELR	804	1	1.38331	1.35756	1.35123	1.57967	1.28576
CIT	Citron Rho-interacting kinase	O14578	YES	YES	TFNNIMNFQR	311	1	1.0937	1.01085	1.22113	1.19915	1.12854	0.540237	0.7638	1.03421	1.18297
CIT	Citron Rho-interacting kinase	O14578	YES	YES	FYLETQAGKLEAQNR	817	1	0.899814	1.08401	0.97394	0.988519	0.978869	0.0613047	0.2434	0.949918	1.00633
CIT	Citron Rho-interacting kinase	O14578	YES	YES	VSEVEAVLSQK	479	1	1.33074	1.22696	1.21281	1.27126	0.981007	39.8866	0.4066	0.981075	1.20842
CIT	Citron Rho-interacting kinase	O14578	YES	YES	SPEHQPSAMSLLAPPSSR	1322	1	1.01246	0.564804	1.11744	0.94758	0.732619	1.55701	0.0702	1.00094	0.749985
CIT	Citron Rho-interacting kinase	O14578	YES	YES	TLYLLAPSFPDKQR	1540	1	1.02486	1.06479	0.504171	0.809244	0.85499	0.575146	0.6538	0.722802	1.02989
CIT	Citron Rho-interacting kinase	O14578	YES	YES	NSPPPFVPTLK	370	1	1.13239	0.587324	0.694498	0.355825	0.439529	0.138203	0.8508	0.496681	1.06622
CIT	Citron Rho-interacting kinase	O14578	YES	YES	CAELEEALQK	1272	1	0.525736	1.17472	1.17014	0.988452	1.14861	0.0717308	0.5556	0.762896	1.12066
CIT	Citron Rho-interacting kinase	O14578	YES	YES	ESQLTALQAAR	887	1	1.32949	1.00609	1.51167	1.34553	1.0164	5.33079	0.1978	1.46502	1.00349
CIT	Citron Rho-interacting kinase	O14578	YES	YES	QLDEASGANDEIVQLR	973	1	0.901441	0.878161	1.05639	0.906521	1.07338	0.659634	0.3028	0.926541	1.0121
CIT	Citron Rho-interacting kinase	O14578	YES	YES	LTQGLQEALDRADLLK	1173	1	0.610376	1.17963	0.74575	0.809016	0.921544	3.46621	0.0889	0.998695	0.706988
CIT	Citron Rho-interacting kinase	O14578	YES	YES	QLTELQLSLQER	875	1	0.948762	1.16171	0.8576	0.705792	1.28738	85.0744	0.4753	0.934772	1.40748
CIT	Citron Rho-interacting kinase	O14578	YES	YES	NPLDAGAAEPIASR	10	1	1.05795	0.516209	0.974237	0.597663	0.843102	0.0541246	0.4598	0.732844	1.02914
CIT	Citron Rho-interacting kinase	O14578	YES	YES	VASSPAPPEGPSHPREPSTPHR	1937	1	0.86701	0.778544	0.882652	0.840866	1.16172	85.9893	0.7249	0.873797	1.27554
CIT	Citron Rho-interacting kinase	O14578	YES	YES	EAQVSAQHLEVHLK	702	1	1.28115	1.0642	1.59968	1.14532	0.980322
CIT	Citron Rho-interacting kinase	O14578	YES	YES	LKFEGLCCHPFFSK	349	1	0.962793	0.730888	0.91159	0.687386	1.08847	7.62342	0.1035	0.999922	0.752479
CIT	Citron Rho-interacting kinase	O14578	YES	YES	IQELQEKLEK	638	1	0.868903	1.03683	1.04489	0.985606	0.883541	0.447175	0.0374	0.928103	0.999907
RIOK3	Serine/threonine-protein kinase RIO3	O14730	YES	YES	VSISFENYR	109	1	1.1034	1.07599	1.10693	1.1035	1.12914	0.0145285	0.9166	0.999818	1.17554
RIOK3	Serine/threonine-protein kinase RIO3	O14730	YES	YES	NVSQFFQK	445	1	1.09251	1.02583	1.1167	1.04858	1.01618	127.138	0.2854	1.11998	0.999406
RIOK3	Serine/threonine-protein kinase RIO3	O14730	YES	YES	EAYYQTLHLMR	384	1	1.05008	1.06897	1.1299	1.02036	1.05791	7.58906e+08	0.3547	1.13095	0.999786
RIOK3	Serine/threonine-protein kinase RIO3	O14730	YES	YES	AGIPCPTVVLLK	342	1	1.02022	1.01088	1.06328	1.05463	1.03784	0.208903	0.7227	1.00499	1.05011
RIOK3	Serine/threonine-protein kinase RIO3	O14730	YES	YES	TTLNEFK	294	1	0.960074	0.930529	1.09053	0.983865	0.997327	0.599526	0.3729	0.963536	1.02389
RIOK3	Serine/threonine-protein kinase RIO3	O14730	YES	YES	VIPTECAIK	282	1	0.73631	0.775994	1.0437	0.83792	1.05791	0.627623	0.3007	0.837433	0.979847
RIOK3	Serine/threonine-protein kinase RIO3	O14730	YES	YES	AGIPCPTVVLLKK	342	1	1.13629	1.12972	0.98705	0.976683	1.21336	24.2927	0.1338	0.999464	1.1782
RIOK3	Serine/threonine-protein kinase RIO3	O14730	YES	YES	MVNSGMLETITGCISTGK	244	1	1.0773	0.944113	1.0951	0.91576	1.06883	7.31483	0	1.01555	1.01753
RIOK3	Serine/threonine-protein kinase RIO3	O14730	YES	YES	HILVMSFIGHDQVPAPK	355	1	1.02173	1.08634	1.03708	0.918968	0.916423	5.6502	0.8224	0.916865	1.03714
RIOK3	Serine/threonine-protein kinase RIO3	O14730	YES	YES	LSNHVFNALK	198	1	1.22126	1.32352	1.45096	1.74011	1.59927	0.311037	0.9345	1.0071	1.74001
RIOK3	Serine/threonine-protein kinase RIO3	O14730	YES	YES	HDEVVCGR	166	1	0.944816	1.01732	0.994406	1.41515	0.995578	3.79473	0.4069	0.987509	1.20544
RIOK3	Serine/threonine-protein kinase RIO3	O14730	YES	YES	VWLIDVSQSVEPTHPHGLEFLFR	419	1	1.22961	1.06561	1.09529	0.99396	1.02077	4.16681	0.2768	1.00729	1.09918
RIOK3	Serine/threonine-protein kinase RIO3	O14730	YES	YES	MENFAPEFQVGDGIGMDLK	179	1	1.31841	1.64541	1.48742	1.62474	1.44371	5759784021754050	0.7662	2.94978	0.999303
RIOK3	Serine/threonine-protein kinase RIO3	O14730	YES	YES	HDEVVCGRK	166	1	1.18519	0.948594	1.01302	0.782202	1.05361	0.0907704	0.3126	0.948402	1.09257
RIOK3	Serine/threonine-protein kinase RIO3	O14730	YES	YES	LNSEEMK	377	1	0.61887	0.472943	2.41745	0.569954	1.09921	0.569998	0.2529	0.697082	1.36228
MAP2K7	Dual specificity mitogen-activated protein kinase kinase 7	O14733	YES	YES	DVKPSNILLDER	243	1	1.15813	0.776012	0.920483	1.05303	1.04202	8.44613	0.1071	1.05009	0.963674
MAP2K7	Dual specificity mitogen-activated protein kinase kinase 7	O14733	YES	YES	HMLGLPSTLFTPR	73	1	1.00219	0.989037	1.05345	1.08075	1.07654	1.52674	0.987	0.997018	1.07867
MAP2K7	Dual specificity mitogen-activated protein kinase kinase 7	O14733	YES	YES	LCDFGISGR	259	1	1.01691	0.918744	1.0407	1.07244	1.02052	1.17989	0.4885	0.978563	1.04663
MAP2K7	Dual specificity mitogen-activated protein kinase kinase 7	O14733	YES	YES	TSGVLSQPHLPFFR	406	1	0.964689	1.10577	0.97856	1.1047	1.04512	0.0559696	0.3969	0.981946	1.05858
MAP2K7	Dual specificity mitogen-activated protein kinase kinase 7	O14733	YES	YES	MQGPIPER	210	1	1.04438	0.9237	0.983685	0.978526	1.0691	31.6828	0.4319	0.985989	1.069
MAP2K7	Dual specificity mitogen-activated protein kinase kinase 7	O14733	YES	YES	QTGYLTIGGQR	102	1	0.926066	0.996761	1.00524	1.03224	1.02776	0.779083	0.554	0.968031	1.03
MAP2K7	Dual specificity mitogen-activated protein kinase kinase 7	O14733	YES	YES	TDFEVLTK	327	1	0.921995	0.977258	0.985023	1.02961	1.01381	2.41257	0.5238	0.966412	1.02172
MAP2K7	Dual specificity mitogen-activated protein kinase kinase 7	O14733	YES	YES	SMESIEIDQK	86	1	1.11768	1.00266	0.963071	1.10166	1.20846	22.3621	0.6874	1.02093	1.21124
MAP2K7	Dual specificity mitogen-activated protein kinase kinase 7	O14733	YES	YES	ILMDLDVVLK	163	1	0.998479	1.18787	0.863299	0.817052	0.953444	0.75107	0.6041	0.877887	1.0621
MAP2K7	Dual specificity mitogen-activated protein kinase kinase 7	O14733	YES	YES	SPSSESSPQHPTPPARPR	55	1	0.922729	0.577822	0.609824	0.954353	0.797555	6.71095	0.0786	0.777619	0.875929
MAP2K7	Dual specificity mitogen-activated protein kinase kinase 7	O14733	YES	YES	RYETLEVDVASWFK	382	1	0.984415	1.11731	1.2407	0.600524	0.994672	6.149	0.4788	0.79758	1.08552
MAP2K7	Dual specificity mitogen-activated protein kinase kinase 7	O14733	YES	YES	RYETLEVDVASWFKDVMAK	382	1	1.53092	1.39481	1.10996	0.576625	1.26706	1.96923	0.3167	0.921899	1.30854
MAP2K7	Dual specificity mitogen-activated protein kinase kinase 7	O14733	YES	YES	SAGCAAYMAPER	277	1	1.1205	1.0932	0.992149	1.01506	0.947308	1.1317	0.5225	0.980877	1.07125
MAP2K7	Dual specificity mitogen-activated protein kinase kinase 7	O14733	YES	YES	TGHVIAVK	142	1	1.13039	0.84512	1.27323	1.17642	1.21841	0.693662	0.6364	0.991849	1.22278
MAP2K7	Dual specificity mitogen-activated protein kinase kinase 7	O14733	YES	YES	VLQEEPPLLPGHMGFSGDFQSFVK	335	1	1.06026	1.02869	1.02662	1.00481	0.983139	9.86491	0.4894	0.985274	1.03075
CHEK1	Serine/threonine-protein kinase Chk1	O14757	YES	YES	VTSGGVSESPSGFSK	278	1	1.07539	1.09707	1.10421	1.06782	1.07284	2.22339e+12	0.8483	1.16654	1.00043
CHEK1	Serine/threonine-protein kinase Chk1	O14757	YES	YES	LIDIVSSQK	462	1	1.06063	1.04212	0.870239	0.873088	0.831851	1.21852	0.9437	0.852544	1.03427
CHEK1	Serine/threonine-protein kinase Chk1	O14757	YES	YES	ISDFGLATVFR	146	1	0.743415	0.415455	0.368371	0.314777	0.311349	0.0325863	0.9966	0.324656	1.00064
CHEK1	Serine/threonine-protein kinase Chk1	O14757	YES	YES	HIQSNLDFSPVNSASSEENVK	293	1	1.07414	1.00762	0.948013	0.964021	1.00194	0.216505	0.5499	0.971303	1.03705
CHEK1	Serine/threonine-protein kinase Chk1	O14757	YES	YES	MCGTLPYVAPELLK	167	1	0.839331	0.325174	0.271826	0.260388	0.202324	0.0486058	0.9956	0.243081	1.00037
CHEK1	Serine/threonine-protein kinase Chk1	O14757	YES	YES	KIDSAPLALLHK	233	1	0.714572	0.190359	0.114088	0.110696	0.106241	0.0353199	1	0.10881	1.00001
CHEK1	Serine/threonine-protein kinase Chk1	O14757	YES	YES	VTEEAVAVK	30	1	0.696371	0.3011	0.335233	0.238897	0.346927	0.0214994	0.9842	0.305468	1.00001
CHEK1	Serine/threonine-protein kinase Chk1	O14757	YES	YES	DIKPENLLLDER	130	1	1.26159	0.449823	0.476368	0.162131	0.332152	0.14392	0.9068	0.323567	1.13081
CHEK1	Serine/threonine-protein kinase Chk1	O14757	YES	YES	DIKPENLLLDERDNLK	130	1	0.882801	0.491788	0.281962	0.330571	0.235981	0.091014	0.9912	0.27523	0.998808
CHEK1	Serine/threonine-protein kinase Chk1	O14757	YES	YES	VNLLEMDDK	428	1	0.688118	0.513233	0.354625	0.701197	0.567762
BCKDK	Branched-chain alpha-ketoacid dehydrogenase kinase	O14874	YES	YES	LTPTMMLYAGR	70	1	1.23318	1.18252	1.25576	0.918119	0.935786	8.08208	0.6558	0.926125	1.16787
IKBKB	Inhibitor of nuclear factor kappa-B kinase subunit beta	O14920	YES	YES	LGTGGFGNVIR	21	1	1.05388	1.00828	0.980032	0.962014	0.878321	115.697	0.8702	0.733113	1.01996
IKBKB	Inhibitor of nuclear factor kappa-B kinase subunit beta	O14920	YES	YES	NLAFFQLR	420	1	1.03103	0.994056	1.08198	0.995158	1.00075
IKBKB	Inhibitor of nuclear factor kappa-B kinase subunit beta	O14920	YES	YES	ALDDILNLK	302	1	1.01878	1.00215	1.08096	1.02566	0.973792	0.992769	0.0003	1.01786	1.01608
IKBKB	Inhibitor of nuclear factor kappa-B kinase subunit beta	O14920	YES	YES	AAMMNLLR	453	1	0.943391	0.827778	1.14322	1.18088	1.08597	0.798579	0.7726	0.923704	1.1371
IKBKB	Inhibitor of nuclear factor kappa-B kinase subunit beta	O14920	YES	YES	DLKPENIVLQQGEQR	145	1	1.00651	1.14279	0.940924	0.845322	0.816695	2.00464	0.8117	0.830996	1.04976
IKBKB	Inhibitor of nuclear factor kappa-B kinase subunit beta	O14920	YES	YES	VIYTQLSK	607	1	0.871156	1.16128	1.19826	1.17795	1.20631	0.129009	0.9062	0.935559	1.19423
IKBKB	Inhibitor of nuclear factor kappa-B kinase subunit beta	O14920	YES	YES	LLLQAIQSFEK	593	1	0.905167	0.934634	1.00266	0.916922	0.871951	5.68946	0.3645	0.84469	0.999646
IKBKB	Inhibitor of nuclear factor kappa-B kinase subunit beta	O14920	YES	YES	FSSSLPYPNNLNSVLAERLEK	255	1	0.933016	0.973057	0.985579	0.996991	1.01109	4.31324	0.401	0.968193	1.01043
IKBKB	Inhibitor of nuclear factor kappa-B kinase subunit beta	O14920	YES	YES	GPVSGSPDSMNASR	667	1	1.23562	1.06188	1.10005	1.07358	1.12864	9.61017	0.3819	1.25254	0.982366
IKBKB	Inhibitor of nuclear factor kappa-B kinase subunit beta	O14920	YES	YES	LSQPGQLMSQPSTASNSLPEPAKK	681	1	1.22346	1.02349	1.05797	0.853502	1.01536	3.09954	0.3861	0.934441	1.08243
IKBKB	Inhibitor of nuclear factor kappa-B kinase subunit beta	O14920	YES	YES	RLTHPNVVAAR	67	1	1.61658	0.946512	0.70375	0.835562	0.9075	0.160753	0.5824	0.815553	1.30832
IKBKB	Inhibitor of nuclear factor kappa-B kinase subunit beta	O14920	YES	YES	WHNQETGEQIAIK	32	1	0.836907	0.764516	1.01685	0.939999	0.592726	72.8436	0.6437	0.54704	0.911679
IKBKB	Inhibitor of nuclear factor kappa-B kinase subunit beta	O14920	YES	YES	LVHILNMVTGTIHTYPVTEDESLQSLK	311	1	1.17325	1.15483	1.05532	1.06299	0.990509	1.60394	0.2915	1.02668	1.10937
IKBKB	Inhibitor of nuclear factor kappa-B kinase subunit beta	O14920	YES	YES	ITYETQISPRPQPESVSCILQEPK	395	1	0.530755	0.752977	0.466697	0.399532	0.821316
IKBKB	Inhibitor of nuclear factor kappa-B kinase subunit beta	O14920	YES	YES	ALELLPKVEEVVSLMNEDEK	622	1	0.643945	0.862499	0.300584	0.533683	0.425344	0.0769751	0.6525	0.357594	0.993168
IKBKB	Inhibitor of nuclear factor kappa-B kinase subunit beta	O14920	YES	YES	LLLQAIQSFEKK	593	1	1.42015	1.06241	1.22564	1.18533	0.975045	29.3362	0.245	0.97543	1.17996
IKBKB	Inhibitor of nuclear factor kappa-B kinase subunit beta	O14920	YES	YES	LTHPNVVAAR	68	1	1.85601	1.38125	0.766481	1.03765	0.236771	28.2556	0.5696	-0.10217	1.38655
IKBKB	Inhibitor of nuclear factor kappa-B kinase subunit beta	O14920	YES	YES	QGGTLDDLEEQAR	556	1	0.881914	1.2566	1.13952	1.11488	1.70038	28.564	0.802	1.06951	1.70046
IKBKB	Inhibitor of nuclear factor kappa-B kinase subunit beta	O14920	YES	YES	EMEQAVELCGR	516	1	0.90355	0.843101	1.06712	0.900798	1.00135	0.629439	0.237	0.915558	0.989749
IKBKB	Inhibitor of nuclear factor kappa-B kinase subunit beta	O14920	YES	YES	KYLNQFENCCGLR	106	1	1.27944	1.03864	0.792233	1.72896	0.635381	0.55612	0.0014	1.06054	1.09749
AURKA	Aurora kinase A	O14965	YES	YES	VLVTQQFPCQNPLPVNSGQAQR	25	1	0.960049	0.912586	0.889832	1.0223	1.00432	8.51378	0.4844	0.940651	1.01385
AURKA	Aurora kinase A	O14965	YES	YES	LVSSHKPVQNQK	64	1	1.66906	1.2586	1.06821	1.03649	1.16734	0.257671	0.2444	1.09057	1.3344
AURKA	Aurora kinase A	O14965	YES	YES	DIKPENLLLGSAGELK	256	1	0.817578	0.295409	0.315473	0.402036	0.23885	0.0270757	0.9727	0.312718	0.999959
AURKA	Aurora kinase A	O14965	YES	YES	QLQATSVPHPVSRPLNNTQK	78	1	0.877201	0.925875	1.12121	1.18822	1.11109	1.1055	0.8576	0.93406	1.14969
AURKA	Aurora kinase A	O14965	YES	YES	QWALEDFEIGRPLGK	127	1	0.55186	0.280653	0.420253	0.297939	0.284454
AURKA	Aurora kinase A	O14965	YES	YES	SKENCISGPVK	4	1	1.06421	0.909125	1.37982	0.855962	1.03901
AURKA	Aurora kinase A	O14965	YES	YES	ISRVEFTFPDFVTEGAR	341	1	0.784988	0.418621	0.276075	0.336744	0.305343	0.0423102	0.9944	0.304487	0.999098
AURKA	Aurora kinase A	O14965	YES	YES	TATYITELANALSYCHSKR	233	1	0.571575	0.193047	0.182276	0.178467	0.102484	0.0196247	0.9936	0.152374	1.00008
AURKA	Aurora kinase A	O14965	YES	YES	LYGYFHDATR	196	1	0.77988	0.136687	0.223337	0.113644	0.125533	0.0250495	0.9902	0.149788	1
GAK	Cyclin-G-associated kinase	O14976	YES	YES	ALVEEEITR	212	1	0.959132	1.06462	1.20564	1.20266	1.11295	0.215606	0.8781	0.979529	1.17377
GAK	Cyclin-G-associated kinase	O14976	YES	YES	GDLDISYITSR	406	1	1.0836	0.992345	1.11138	1.1094	1.10248	0.322716	0.5106	1.00113	1.1334
GAK	Cyclin-G-associated kinase	O14976	YES	YES	VIQSVANYAK	396	1	0.943511	0.837505	1.02317	0.962727	1.03409	0.764272	0.3645	0.927023	1.00671
GAK	Cyclin-G-associated kinase	O14976	YES	YES	AASAVAVCSFLCFCR	513	1	1.00535	0.928071	1.14122	1.11152	1.05419	0.646819	0.7499	0.977782	1.10238
GAK	Cyclin-G-associated kinase	O14976	YES	YES	AVVMTPVPLFSK	579	1	1.13737	0.951904	1.00247	1.26449	1.08756	5.47878	0.4724	1.02276	1.176
GAK	Cyclin-G-associated kinase	O14976	YES	YES	EAPPWENSSMR	718	1	1.14622	0.336631	0.491917	0.306077	0.577297	0.0624579	0.902	0.427978	1.07315
GAK	Cyclin-G-associated kinase	O14976	YES	YES	LSIAEVVHQLQEIAAAR	304	1	0.946799	0.502523	0.414474	0.438281	0.35578	0.0781415	0.9913	0.401826	1.00046
GAK	Cyclin-G-associated kinase	O14976	YES	YES	VSENDFEDLLSNQGFSSR	1175	1	1.04277	1.05195	0.990262	1.03775	1.04763	262.507	0.278	1.06814	1.00002
GAK	Cyclin-G-associated kinase	O14976	YES	YES	AMLQVNPEER	294	1	0.923723	0.489816	0.375418	0.409177	0.363384	0.0724108	0.9972	0.381562	0.999651
GAK	Cyclin-G-associated kinase	O14976	YES	YES	VSECGWAAR	469	1	1.0269	0.939886	1.09403	1.28987	1.40209	8.55163	0.9663	0.9894	1.43418
GAK	Cyclin-G-associated kinase	O14976	YES	YES	NVCVVHCMDGR	502	1	1.06932	0.88014	0.664906	0.765051	1.03018	0.152346	0.431	0.820033	1.0347
GAK	Cyclin-G-associated kinase	O14976	YES	YES	MFQIQFHTGFVPR	664	1	1.0077	1.02562	1.03402	1.06643	1.09411	2.73158	0.9583	0.999338	1.09835
GAK	Cyclin-G-associated kinase	O14976	YES	YES	SGCRPFCEVYVGDER	593	1	1.08168	0.76827	1.07468	0.960116	0.866261	93.7779	0.1395	0.763351	0.980067
GAK	Cyclin-G-associated kinase	O14976	YES	YES	LFTNLKDTSSK	385	1	1.04546	1.14205	1.08737	1.12128	1.25604	1.61042	0.7222	0.99539	1.26438
GAK	Cyclin-G-associated kinase	O14976	YES	YES	ACTQPRPNYASNFSVIGAR	1141	1	1.15852	1.19796	1.40321	1.53946	1.807	8.54943	0.9742	1.01265	2.05035
GAK	Cyclin-G-associated kinase	O14976	YES	YES	GPLSCDTVLK	141	1	0.900767	0.397029	0.744301	0.298747	0.229784	10.0622	0.7396	-0.201159	1.0072
GAK	Cyclin-G-associated kinase	O14976	YES	YES	WTPVGMADLVAPEQVKK	1249	1	0.850683	0.71417	0.729277	0.875948	1.02656	26.9504	0.3856	0.823561	1.02841
GAK	Cyclin-G-associated kinase	O14976	YES	YES	RAPHLHTLYNICR	478	1	1.12789	1.19783	1.45007	1.33293	1.21892	0.0123115	0.6883	0.978382	1.31133
GAK	Cyclin-G-associated kinase	O14976	YES	YES	APSFAQKPK	1166	1	0.812672	0.799403	1.60765	1.34345	0.995099	0.591279	0.5809	0.870665	1.31527
GAK	Cyclin-G-associated kinase	O14976	YES	YES	LFSTAEAAVYMFSMKR	528	1	0.989138	0.725392	0.940976	0.837347	1.17601	46.9525	0.5428	0.898568	1.17606
GAK	Cyclin-G-associated kinase	O14976	YES	YES	YIEYMCDMVAEEPITPHSKPILVR	555	1	1.03988	0.631116	0.727462	0.746844	0.984594	1.08776	0.1695	0.653931	0.999996
GAK	Cyclin-G-associated kinase	O14976	YES	YES	GPPPPVGPAGSGYSGGLALAEYDQPYGGFLDILR	346	1	1.02585	1.26806	0.924585	1.01762	1.16505	0.706166	0.068	1.16024	1
GAK	Cyclin-G-associated kinase	O14976	YES	YES	WTPVGMADLVAPEQVK	1249	1	2.70379	2.46883	2.4033	1.54136	2.86342
GAK	Cyclin-G-associated kinase	O14976	YES	YES	IAVMSFPAEGVESALK	417	1	0.89462	0.866486	1.04577	1.02419	0.985867	0.69588	0.5518	0.92037	1.01862
GAK	Cyclin-G-associated kinase	O14976	YES	YES	LCDFGSATTISHYPDYSWSAQR	189	1	0.968682	0.389182	0.10616	0.124278	0.147679	0.129859	0.9988	0.124825	0.995827
GAK	Cyclin-G-associated kinase	O14976	YES	YES	FLHTLDWQEEKEAETGAENASSK	791	1	1.49934	0.86019	0.741709	0.431953	0.596985	0.186549	0.7513	0.590213	1.24967
GAK	Cyclin-G-associated kinase	O14976	YES	YES	ALLSTLHTVLWDGESR	1233	1	0.848952	0.9698	1.05472	0.921237	0.995256	0.169191	0.2048	0.924478	0.990406
GAK	Cyclin-G-associated kinase	O14976	YES	YES	DLKVENLLLSNQGTIK	173	1	1.02262	0.575704	0.392722	0.415034	0.453993	0.165061	0.9949	0.420584	1.01131
GAK	Cyclin-G-associated kinase	O14976	YES	YES	VENLLLSNQGTIK	176	1	1.95551	0.561989	0.317153	0.463651	1.03945	0.0731431	0.5806	0.595519	1.47785
GAK	Cyclin-G-associated kinase	O14976	YES	YES	VLAEGGFAFVYEAQDVGSGREYALK	45	1	0.822367	1.72746	0.983377	1.1228	0.792515
GAK	Cyclin-G-associated kinase	O14976	YES	YES	LCDFGSATTISHYPDYSWSAQRR	189	1	0.737177	0.733681	0.55688	0.894516	1.9398	37.3519	0.9185	0.756995	1.98486
GAK	Cyclin-G-associated kinase	O14976	YES	YES	SLLQSALDFLAGPGSLGGASGR	2	1	1.85979	2.2923	1.93103	2.50438	1.17627
MAST4	Microtubule-associated serine/threonine-protein kinase 4	O15021	YES	YES	GEKVSEAPEPVPR	2	1	1.36838	1.26344	1.3827	1.3494	1.22716	1.96153e+07	0.8166	1.6409	0.999294
MAST4	Microtubule-associated serine/threonine-protein kinase 4	O15021	YES	YES	SLDWNSLLR	845	1	1.06465	1.21547	1.36984	1.04575	0.843653	23.8914	0.5055	0.840358	1.16228
MAST4	Microtubule-associated serine/threonine-protein kinase 4	O15021	YES	YES	AAGGMLELPAPSNR	2487	1	0.506588	1.15706	0.770034	1.1387	1.26319	13.6516	0.4038	0.857107	1.25405
MAST4	Microtubule-associated serine/threonine-protein kinase 4	O15021	YES	YES	GAERPAAGVGKGFPEAR	2402	1	1.91255	1.367	2.41746	2.57543	1.20062
CHUK	Inhibitor of nuclear factor kappa-B kinase subunit alpha	O15111	YES	YES	IQLPIIQLR	416	1	0.984455	0.981304	1.05734	1.01595	0.96472	0.492534	0.1535	1.01243	0.988475
CHUK	Inhibitor of nuclear factor kappa-B kinase subunit alpha	O15111	YES	YES	DLKPENIVLQDVGGK	144	1	1.00255	0.941252	0.85874	0.955607	0.86626	0.188507	0.7059	0.893537	1.00129
CHUK	Inhibitor of nuclear factor kappa-B kinase subunit alpha	O15111	YES	YES	ESQILSLLSDIGSGIR	118	1	1.0485	1.06243	1.04292	1.08245	1.05413
CHUK	Inhibitor of nuclear factor kappa-B kinase subunit alpha	O15111	YES	YES	LGTGGFGNVCLYQHR	21	1	1.03286	0.993157	1.12098	1.00595	1.01306	686.029	0.0807	1.00063	1.06517
CHUK	Inhibitor of nuclear factor kappa-B kinase subunit alpha	O15111	YES	YES	GGPVDLTLKQPR	288	1	0.952312	1.00479	1.05139	0.958708	1.02565	0.124941	0.213	0.976291	1.01212
CHUK	Inhibitor of nuclear factor kappa-B kinase subunit alpha	O15111	YES	YES	IISFLLPPDESLHSLQSR	323	1	1.03167	0.88707	1.0381	0.723085	0.892418	6.32463	0.6012	0.807755	0.989212
CHUK	Inhibitor of nuclear factor kappa-B kinase subunit alpha	O15111	YES	YES	QGDLMESLEQR	553	1	0.934391	0.774562	1.00911	0.884503	0.935083	0.744384	0.1918	0.999942	0.815181
CHUK	Inhibitor of nuclear factor kappa-B kinase subunit alpha	O15111	YES	YES	MERPPGLRPGAGGPWEMR	1	1	1.12429	1.08211	1.38001	0.866521	1.32136	17.7366	0.1162	1.33828	0.999871
CHUK	Inhibitor of nuclear factor kappa-B kinase subunit alpha	O15111	YES	YES	CIFACEEMSGEVR	241	1	1.12081	1.18497	1.30947	1.39919	1.39227	0.293213	0.9909	1.00312	1.43941
CHUK	Inhibitor of nuclear factor kappa-B kinase subunit alpha	O15111	YES	YES	SLSDCVNYIVQDSK	402	1	0.919806	0.897186	1.00073	0.658109	0.718537	6.889	0.8995	0.688189	0.954441
CHUK	Inhibitor of nuclear factor kappa-B kinase subunit alpha	O15111	YES	YES	IIVHTVQSQDR	589	1	1.3173	0.935913	0.983381	1.0339	0.889416	0.0722522	0.4576	0.960617	1.15864
CHUK	Inhibitor of nuclear factor kappa-B kinase subunit alpha	O15111	YES	YES	LLNKPENCCGLK	106	1	0.93949	1.05427	1.01856	1.14579	1.02346	0.108047	0.4739	0.969703	1.06284
CHUK	Inhibitor of nuclear factor kappa-B kinase subunit alpha	O15111	YES	YES	YSEQMTYGISSEK	494	1	0.956597	0.44267	0.75181	0.699547	0.762485	14790.2	0.3308	1.00053	0.329465
CHUK	Inhibitor of nuclear factor kappa-B kinase subunit alpha	O15111	YES	YES	CFVLMDHILNLK	300	1	0.809367	0.49973	0.925006	1.03313	0.876135	1.41912	0.2497	0.769709	0.954563
CHUK	Inhibitor of nuclear factor kappa-B kinase subunit alpha	O15111	YES	YES	KVWAEAVHYVSGLKEDYSR	425	1	1.03087	1.16431	0.923298	0.830178	1.05432	0.7833	0.3777	0.935313	1.06486
CHUK	Inhibitor of nuclear factor kappa-B kinase subunit alpha	O15111	YES	YES	KLNHANVVK	67	1	1.84431	1.74571	1.72644	2.10826	1.91927	0.00621072	0.9056	0.999436	2.46628
CHUK	Inhibitor of nuclear factor kappa-B kinase subunit alpha	O15111	YES	YES	HRPSDHSYSDSTEMVK	573	1	1.15275	1.42247	1.05544	0.968988	0.869752	2.00262	0.4815	0.919259	1.19169
CHUK	Inhibitor of nuclear factor kappa-B kinase subunit alpha	O15111	YES	YES	AAMLSLLR	450	1	1.06013	0.964376	0.948561	0.946669	0.872561	25.2245	0.7394	0.807957	1.02017
CHUK	Inhibitor of nuclear factor kappa-B kinase subunit alpha	O15111	YES	YES	KLLNKPENCCGLK	105	1	0.677241	1.57358	0.900403	0.721497	1.00769	2.01056	0.0933	1.09891	0.875655
CHUK	Inhibitor of nuclear factor kappa-B kinase subunit alpha	O15111	YES	YES	IVHILNMTSAK	312	1	1.36868	1.75041	1.5353	1.16872	0.874513	21.1992	0.4515	0.871402	1.41353
TRIM24	Transcription intermediary factor 1-alpha	O15164	YES	NO	LLPCLHSFCQR	70	1	1.01774	0.934118	1.01099	0.975117	1.01269	57311.6	0.0158	0.980468	1.00011
TRIM24	Transcription intermediary factor 1-alpha	O15164	YES	NO	VIIDTLITK	268	1	1.04515	1.0984	1.03579	1.1229	0.963118	4.66473	0	1.04481	1.04389
TRIM24	Transcription intermediary factor 1-alpha	O15164	YES	NO	IIEVNQNQK	295	1	1.26119	1.39172	1.42256	1.19067	1.41139
TRIM24	Transcription intermediary factor 1-alpha	O15164	YES	NO	FPTQISLAQLR	459	1	1.14856	0.990043	1.22567	0.976985	1.0397	0.249268	0.0946	1.15164	1.00069
TRIM24	Transcription intermediary factor 1-alpha	O15164	YES	NO	YQFIEEAFQNQK	256	1	1.206	0.96928	1.19723	0.952592	1.17923	3.84417	0.114	1.20237	0.9993
TRIM24	Transcription intermediary factor 1-alpha	O15164	YES	NO	LNLLDTCAVCHQNIQSR	50	1	1.15972	1.10579	1.00043	1.07556	1.01153	0.572834	0.2394	1.02924	1.08862
TRIM24	Transcription intermediary factor 1-alpha	O15164	YES	NO	AVAAAAAASAAASGGPSAAPSGENEAESR	8	1	1.62708	1.13971	0.88255	0.847754	0.820285	0.225548	0.5732	0.850182	1.31365
TRIM24	Transcription intermediary factor 1-alpha	O15164	YES	NO	SILTSLLLNSSQSSTSEETVLR	758	1	1.00181	0.964958	0.924784	0.9468	0.945661	0.182354	0.9368	0.939079	1.00092
TRIM24	Transcription intermediary factor 1-alpha	O15164	YES	NO	WAVSSGSSTALLYSK	365	1	1.63168	1.48212	1.36682	1.36746	1.54292	96.0932	0.7835	1.91414	1.00307
TRIM24	Transcription intermediary factor 1-alpha	O15164	YES	NO	LMQQQQEVAGLSK	342	1	1.07937	1.08715	1.16198	1.10937	1.00301	24.6167	0.3285	1.17472	0.999828
TRIM24	Transcription intermediary factor 1-alpha	O15164	YES	NO	LENYFEELLK	993	1	1.10602	0.452891	0.780817	1.13333	1.59199	22.4189	0.6562	0.834927	1.5945
TRIM24	Transcription intermediary factor 1-alpha	O15164	YES	NO	CLPAPQR	81	1	1.04475	1.00827	1.03	0.83887	1.1068	0.00903677	0.0002	1.00705	1.0027
TRIM24	Transcription intermediary factor 1-alpha	O15164	YES	NO	QESDEESRPQNANYPR	742	1	0.490034	0.923789	0.620782	0.950627	0.518341	22.8391	0.2754	0.936607	0.429575
TRIM24	Transcription intermediary factor 1-alpha	O15164	YES	NO	LQEDYSMYSKPEDFVADFR	952	1	0.734773	1.37108	0.987981	1.37323	1.62511	18.074	0.6181	1.02325	1.62706
TRIM24	Transcription intermediary factor 1-alpha	O15164	YES	NO	ALLHQLESLAK	326	1	0.917267	1.01397	1.12563	1.08963	1.09048	0.229917	0.856	0.958617	1.10193
TRIM24	Transcription intermediary factor 1-alpha	O15164	YES	NO	MEVAVEK	1	1	0.978709	0.918891	1.02243	1.29757	1.10602	2.7493	0.7561	0.965776	1.20179
TRIM24	Transcription intermediary factor 1-alpha	O15164	YES	NO	SIEERQLLK	1042	1	0.824626	0.688119	0.509991	1.28383	0.681858	6.43249	0.1813	0.755689	0.982824
PDPK1	3-phosphoinositide-dependent protein kinase 1	O15530	YES	YES	TQTESSTPPGIPGGSR	31	1	0.941123	1.03668	0.934206	1.02005	1.00982	1.51853	0.0002	0.989267	0.991761
PDPK1	3-phosphoinositide-dependent protein kinase 1	O15530	YES	YES	FYTAEIVSALEYLHGK	184	1	0.345049	0.27564	0.371484	0.300288	0.202339
PDPK1	3-phosphoinositide-dependent protein kinase 1	O15530	YES	YES	AGNEYLIFQK	284	1	1.01227	1.066	1.21784	1.22001	1.12871	0.252563	0.8841	1.00607	1.18892
PDPK1	3-phosphoinositide-dependent protein kinase 1	O15530	YES	YES	ILGEGSFSTVVLAR	87	1	0.264853	0.239731	0.253318	0.268014	0.219645
PDPK1	3-phosphoinositide-dependent protein kinase 1	O15530	YES	YES	QLLLTEGPHLYYVDPVNK	475	1	0.260089	0.725327	1.03793	0.462763	0.905142	1.45196	0.1754	0.36982	0.992227
PDPK1	3-phosphoinositide-dependent protein kinase 1	O15530	YES	YES	IGSFDETCTR	174	1	0.333756	0.24243	0.287424	0.418251	0.378895	79838	0.9496	1.00254	-0.335323
PAPSS1	Bifunctional 3'-phosphoadenosine 5'-phosphosulfate synthase 1	O43252	NO	YES	ATNVTYQAHHVSR	25	1	0.995287	1.03904	0.937142	0.93287	0.949898	0.762831	0.8527	0.939754	1.01145
PAPSS1	Bifunctional 3'-phosphoadenosine 5'-phosphosulfate synthase 1	O43252	NO	YES	MEIPGSLCKK	1	1	1.139	0.949196	0.996376	1.05993	0.977706	0.070574	0.3077	0.995628	1.06916
PAPSS1	Bifunctional 3'-phosphoadenosine 5'-phosphosulfate synthase 1	O43252	NO	YES	LSNNAQNWGMQR	13	1	1.11778	1.03677	1.07314	1.08972	1.04099	15.419	0.4808	1.13122	1.00173
PAPSS1	Bifunctional 3'-phosphoadenosine 5'-phosphosulfate synthase 1	O43252	NO	YES	GCTVWLTGLSGAGK	52	1	1.19386	1.09716	1.1264	1.33758	1.31355	0.44619	0.7087	0.995807	1.37715
PAPSS1	Bifunctional 3'-phosphoadenosine 5'-phosphosulfate synthase 1	O43252	NO	YES	MEIPGSLCKKVK	1	1	1.1096	0.85465	1.07876	0.903946	1.03507	0.0578122	0.1959	0.968344	1.0546
PAPSS1	Bifunctional 3'-phosphoadenosine 5'-phosphosulfate synthase 1	O43252	NO	YES	QIHEGASLPFFEVFVDAPLHVCEQR	144	1	0.97024	1.08623	0.960123	0.917093	1.09179	0.422296	0.0045	0.995981	1.01355
PAPSS1	Bifunctional 3'-phosphoadenosine 5'-phosphosulfate synthase 1	O43252	NO	YES	LFADAGLVCITSFISPYTQDRNNAR	119	1	1.20697	1.09276	1.07101	1.07276	1.2197	0.00872938	0.399	1.0013	1.26386
PAPSS1	Bifunctional 3'-phosphoadenosine 5'-phosphosulfate synthase 1	O43252	NO	YES	NLGFSPEDREENVR	98	1	0.868592	0.976831	0.929533	0.970604	1.17022	38.4374	0.8034	0.943745	1.1813
PAPSS1	Bifunctional 3'-phosphoadenosine 5'-phosphosulfate synthase 1	O43252	NO	YES	MEIPGSLCK	1	1	1.3416	0.990045	1.36346	1.71893	1.57984	2.07424	0.7954	1.11071	1.64948
PAPSS1	Bifunctional 3'-phosphoadenosine 5'-phosphosulfate synthase 1	O43252	NO	YES	NLGFSPEDREENVRR	98	1	1.04852	0.97729	0.966624	1.1006	1.23894	21.8469	0.9248	0.998108	1.24013
PAPSS1	Bifunctional 3'-phosphoadenosine 5'-phosphosulfate synthase 1	O43252	NO	YES	AWTVLTEYYK	610	1	0.978926	0.946198	0.980951	0.997582	1.12025	46.242	0.9173	0.97647	1.14447
PAPSS1	Bifunctional 3'-phosphoadenosine 5'-phosphosulfate synthase 1	O43252	NO	YES	TTVSMALEEYLVCHGIPCYTLDGDNIR	66	1	0.968267	0.933289	0.881326	0.974547	1.00273	0.0169452	0.2116	1	0.947963
PAPSS1	Bifunctional 3'-phosphoadenosine 5'-phosphosulfate synthase 1	O43252	NO	YES	TDSCDVNDCVQQVVELLQER	204	1	1.03717	1.17575	1.17928	1.42916	1.22893	0.265888	0.7464	0.997481	1.31885
PAPSS1	Bifunctional 3'-phosphoadenosine 5'-phosphosulfate synthase 1	O43252	NO	YES	LFADAGLVCITSFISPYTQDR	119	1	0.949982	1.09752	1.00043	1.18971	1.07052	5.43105	0.5001	1.01185	1.13013
PAPSS1	Bifunctional 3'-phosphoadenosine 5'-phosphosulfate synthase 1	O43252	NO	YES	ELYVPENK	236	1	1.51389	1.70124	1.58186	1.51611	1.6408	3.70101e+07	0.9182	2.2703	0.999992
PAPSS1	Bifunctional 3'-phosphoadenosine 5'-phosphosulfate synthase 1	O43252	NO	YES	VLTMAPGLITLEIVPFR	545	1	0.708439	0.866044	0.597932	0.757528	1.01505	1.19673	0.2679	0.572479	1.0026
PAPSS1	Bifunctional 3'-phosphoadenosine 5'-phosphosulfate synthase 1	O43252	NO	YES	MDYYDSEHHEDFEFISGTR	572	1	0.647703	0.468182	0.942477	0.700859	1.17911	0.931231	0.2418	0.705323	0.941917
PAPSS1	Bifunctional 3'-phosphoadenosine 5'-phosphosulfate synthase 1	O43252	NO	YES	MVMEQGDWLIGGDLQVLDRVYWNDGLDQYR	368	1	1.13618	0.893579	1.1243	1.04688	1.08714	353.537	0.0745	1.14972	1.00205
DAPK3	Death-associated protein kinase 3	O43293	YES	YES	FVQDLVR	433	1	0.980852	1.00514	1.07851	1.18927	1.09228	1.79421	0.837	0.995186	1.14073
DAPK3	Death-associated protein kinase 3	O43293	YES	YES	VLEEAAAAEEGLR	328	1	1.10422	0.95398	1.18389	1.1801	1.09788	0.686153	0.6189	1.01935	1.15406
PPIP5K2	Inositol hexakisphosphate and diphosphoinositol-pentakisphosphate kinase 2	O43314	NO	YES	ILPTPPATLK	1189	1	1.01092	0.94801	1.00119	1.04553	1.00728	2.4425	0.3902	0.986328	1.02642
PPIP5K2	Inositol hexakisphosphate and diphosphoinositol-pentakisphosphate kinase 2	O43314	NO	YES	FFVGPEDTEINPGNYR	7	1	1.0631	0.989795	1.04089	1.01624	1.01009	1.41126	0.0083	1.01655	1.02271
PPIP5K2	Inositol hexakisphosphate and diphosphoinositol-pentakisphosphate kinase 2	O43314	NO	YES	YPVILNAR	282	1	0.963458	1.03116	0.982902	1.09251	0.898398	47.7552	0.5225	0.898364	1.01401
PPIP5K2	Inositol hexakisphosphate and diphosphoinositol-pentakisphosphate kinase 2	O43314	NO	YES	ILGNIVMR	341	1	1.02757	0.958748	1.00686	1.04549	0.947403	1.72966	0.0258	0.985451	1.00647
PPIP5K2	Inositol hexakisphosphate and diphosphoinositol-pentakisphosphate kinase 2	O43314	NO	YES	AVILFKPMVSEPIHIHR	944	1	0.981186	1.01461	1.04409	1.00038	0.969365	11.3318	0.282	0.980906	1.0106
PPIP5K2	Inositol hexakisphosphate and diphosphoinositol-pentakisphosphate kinase 2	O43314	NO	YES	EVYSILQAEGILLPR	136	1	0.901289	0.880395	0.964925	1.02568	0.865049
PPIP5K2	Inositol hexakisphosphate and diphosphoinositol-pentakisphosphate kinase 2	O43314	NO	YES	SSVYSPESNVR	219	1	1.21248	1.02628	0.885239	0.935932	0.794465	0.253043	0.6772	0.871622	1.10613
PPIP5K2	Inositol hexakisphosphate and diphosphoinositol-pentakisphosphate kinase 2	O43314	NO	YES	ASSKPATSGPSSAVVPNTSSR	1202	1	0.889231	1.04932	0.905036	0.932936	0.912816	6854.62	0.19	0.998118	0.804475
PPIP5K2	Inositol hexakisphosphate and diphosphoinositol-pentakisphosphate kinase 2	O43314	NO	YES	ANGQSYVCDVNGFSFVK	313	1	0.9594	0.912327	0.882097	0.950425	0.886212	0.0238539	0.7243	0.906752	1.00002
PPIP5K2	Inositol hexakisphosphate and diphosphoinositol-pentakisphosphate kinase 2	O43314	NO	YES	TAEISSTALR	1161	1	1.15529	1.03538	1.01008	0.902926	1.05226	0.21261	0.2871	0.988208	1.07745
PPIP5K2	Inositol hexakisphosphate and diphosphoinositol-pentakisphosphate kinase 2	O43314	NO	YES	VSLNTYTPAK	1179	1	0.98763	0.942523	0.84146	0.900329	1.08034	68.3961	0.5107	0.934382	1.09372
PPIP5K2	Inositol hexakisphosphate and diphosphoinositol-pentakisphosphate kinase 2	O43314	NO	YES	EVRYPVILNAR	279	1	1.11689	1.31485	1.44292	1.55557	1.27965	0.0602164	0.8103	1.00339	1.42743
PPIP5K2	Inositol hexakisphosphate and diphosphoinositol-pentakisphosphate kinase 2	O43314	NO	YES	KTAEISSTALR	1160	1	1.16019	1.20188	1.1982	1.25311	1.27049	0.0668003	0.9855	0.999508	1.35352
PPIP5K2	Inositol hexakisphosphate and diphosphoinositol-pentakisphosphate kinase 2	O43314	NO	YES	KVSLNTYTPAK	1178	1	0.934025	1.06815	1.11766	1.12641	0.971411	0.0930343	0.452	0.967123	1.0727
PPIP5K2	Inositol hexakisphosphate and diphosphoinositol-pentakisphosphate kinase 2	O43314	NO	YES	LRNPFVINDLNMQYLIQDRR	116	1	1.09301	1.07686	1.00332	0.871505	1.01467	2.07907	0.5045	0.943105	1.05663
PPIP5K2	Inositol hexakisphosphate and diphosphoinositol-pentakisphosphate kinase 2	O43314	NO	YES	YAILNRDPNNPK	151	1	1.03777	0.842134	0.61427	0.834624	0.797618	0.169884	0.7543	0.748825	1.01898
PPIP5K2	Inositol hexakisphosphate and diphosphoinositol-pentakisphosphate kinase 2	O43314	NO	YES	FSISFAR	1107	1	1.18843	1.1441	1.17367	1.04667	1.14204	41.7939	0.0002	1.11241	1.11666
PPIP5K2	Inositol hexakisphosphate and diphosphoinositol-pentakisphosphate kinase 2	O43314	NO	YES	CVIAVIR	382	1	1.02939	0.92244	1.01302	0.856127	1.17353	71.2361	0.6295	0.964158	1.21222
PPIP5K2	Inositol hexakisphosphate and diphosphoinositol-pentakisphosphate kinase 2	O43314	NO	YES	NPFVINDLNMQYLIQDRR	118	1	0.933203	0.897725	0.782029	1.01058	0.949689	0.373395	0.1747	0.831602	1.00002
PPIP5K2	Inositol hexakisphosphate and diphosphoinositol-pentakisphosphate kinase 2	O43314	NO	YES	RPFKIDNDDEPHTSK	923	1	1.79433	1.24412	1.51188	1.24427	0.94323	23.87	0.3133	0.94196	1.38745
PPIP5K2	Inositol hexakisphosphate and diphosphoinositol-pentakisphosphate kinase 2	O43314	NO	YES	SLAFTSSIFGSWQQVVSENANYLR	1019	1	0.744517	0.730699	0.635787	0.606617	1.10472	23.6894	0.2252	0.997528	0.525209
PPIP5K2	Inositol hexakisphosphate and diphosphoinositol-pentakisphosphate kinase 2	O43314	NO	YES	TCDKVYSLIQSLTSQIR	662	1	0.972929	1.12247	1.24583	1.5594	0.708848	0.999141	0.0304	1.24173	1.00008
PPIP5K2	Inositol hexakisphosphate and diphosphoinositol-pentakisphosphate kinase 2	O43314	NO	YES	AVILFKPMVSEPIHIHRK	944	1	1.21776	1.21205	1.16071	0.920098	1.07401	5.36341	0.4129	0.997058	1.14779
PPIP5K2	Inositol hexakisphosphate and diphosphoinositol-pentakisphosphate kinase 2	O43314	NO	YES	REVYSILQAEGILLPR	135	1	0.842088	0.49147	1.0035	0.929206	0.597192	0.759643	0.1828	0.999818	0.545929
PPIP5K2	Inositol hexakisphosphate and diphosphoinositol-pentakisphosphate kinase 2	O43314	NO	YES	VCLAFKQTVCGFDLLR	297	1	0.885102	0.933764	0.92619	0.923292	1.02866	53.0487	0.5206	0.933661	1.02949
PPIP5K2	Inositol hexakisphosphate and diphosphoinositol-pentakisphosphate kinase 2	O43314	NO	YES	SKPMKEILER	57	1	0.730604	0.783798	0.903259	0.770217	0.808436	0.925497	0.6674	0.996989	0.587113
PPIP5K2	Inositol hexakisphosphate and diphosphoinositol-pentakisphosphate kinase 2	O43314	NO	YES	LTSSGCIDDATR	1089	1	3.10242	1.00445	3.05395	3.03211	3.46081	9.39505	0.515	1.03231	4.87147
PPIP5K2	Inositol hexakisphosphate and diphosphoinositol-pentakisphosphate kinase 2	O43314	NO	YES	LYFTSESHVHSLLSILR	821	1	1.15605	0.609224	0.409198	1.20313	0.485922	0.0641921	0.3468	0.676335	1.07879
PPIP5K2	Inositol hexakisphosphate and diphosphoinositol-pentakisphosphate kinase 2	O43314	NO	YES	SSVYSPESNVRK	219	1	4.24238	0.561621	0.659541	0.511414	0.980176	0.0710124	0.4829	0.678029	2.62102
MAP3K7	Mitogen-activated protein kinase kinase kinase 7	O43318	YES	YES	AFIVELR	73	1	1.00613	0.920629	0.810027	0.68731	0.728106	0.777822	0.9779	0.70084	1.00612
MAP3K7	Mitogen-activated protein kinase kinase kinase 7	O43318	YES	YES	VQTEIALLLQR	536	1	1.12893	1.00976	0.981381	0.981802	1.07509	0.0922438	0.2037	1.01143	1.06433
MAP3K7	Mitogen-activated protein kinase kinase kinase 7	O43318	YES	YES	MITTSGPTSEKPTR	464	1	1.18814	1.06329	1.21931	1.01699	1.16802	28025.9	0.3231	1.26319	0.999946
MAP3K7	Mitogen-activated protein kinase kinase kinase 7	O43318	YES	YES	MSADMSEIEAR	388	1	0.975555	1.06198	0.981055	0.948003	0.922151	2.23545	0.6257	0.935052	1.0125
MAP3K7	Mitogen-activated protein kinase kinase kinase 7	O43318	YES	YES	SIQDLTVTGTEPGQVSSR	439	1	1.02273	1.17977	1.04294	1.09635	1.01932	5.17737	0.1923	1.1435	1.00086
MAP3K7	Mitogen-activated protein kinase kinase kinase 7	O43318	YES	YES	ESMAVFEQHCK	518	1	1.35402	1.19273	1.19088	1.17685	1.0855	40.772	0.1122	1.0801	1.1848
MAP3K7	Mitogen-activated protein kinase kinase kinase 7	O43318	YES	YES	SLSTYYQQCK	580	1	1.08429	1.23499	1.32506	1.13315	1.08936	1.65048e+18	0.3658	1.35132	0.996357
MAP3K7	Mitogen-activated protein kinase kinase kinase 7	O43318	YES	YES	TASFGNILDVPEIVISGNGQPR	415	1	1.03204	1.02094	0.883413	0.973957	0.826729	0.56555	0.662	0.894606	1.01794
MAP3K7	Mitogen-activated protein kinase kinase kinase 7	O43318	YES	YES	KAFIVELR	72	1	1.04594	1.05719	0.475679	0.0451835	0.166806	1.84635	0.9914	0.105987	1.03438
MAP3K7	Mitogen-activated protein kinase kinase kinase 7	O43318	YES	YES	KTASFGNILDVPEIVISGNGQPR	414	1	0.430394	1.11908	0.787465	1.1568	0.880891	0.0657272	0.2737	0.715195	0.986057
MAP3K7	Mitogen-activated protein kinase kinase kinase 7	O43318	YES	YES	SLSTYYQQCKK	580	1	1.29177	1.22539	0.931167	1.15047	1.50717	8.808	0.2303	1.00519	1.48506
MAP3K7	Mitogen-activated protein kinase kinase kinase 7	O43318	YES	YES	IAATTAYSKPK	399	1	1.19856	1.2128	1.3269	1.08687	1.47767	0.812066	0.4936	0.998124	1.49837
MAP3K7	Mitogen-activated protein kinase kinase kinase 7	O43318	YES	YES	NLPKPIESLMTR	254	1	1.1442	0.92938	0.253333	0.0544576	0.0698437	0.730315	0.9908	0.0589608	1.07144
MAP3K7	Mitogen-activated protein kinase kinase kinase 7	O43318	YES	YES	RKPFDEIGGPAFR	226	1	1.77303	1.06163	0.0746596	0.124924	0.100032	0.248865	0.8777	0.0998466	1.38651
MAP3K7	Mitogen-activated protein kinase kinase kinase 7	O43318	YES	YES	EIEVEEVVGR	35	1	0.920643	0.773711	0.191837	0.052561	0.0575026	0.542005	0.9977	0.048966	0.969222
MAP3K7	Mitogen-activated protein kinase kinase kinase 7	O43318	YES	YES	IMWAVHNGTRPPLIK	239	1	1.52263	0.960776	0.523881	0.80463	0.813227	0.191731	0.6537	0.713849	1.2613
RIPK2	Receptor-interacting serine/threonine-protein kinase 2	O43353	YES	YES	SLPAPQDNDFLSR	363	1	0.969062	1.00712	1.03114	1.02559	1.04771	0.220615	0.8047	0.984544	1.03493
RIPK2	Receptor-interacting serine/threonine-protein kinase 2	O43353	YES	YES	IADFGLSK	162	1	0.987029	0.663925	0.58274	0.631309	0.568883	0.097784	0.9892	0.594193	0.999514
RIPK2	Receptor-interacting serine/threonine-protein kinase 2	O43353	YES	YES	QMGLQPYPEILVVSR	514	1	1.14938	1.04702	1.87646	2.07754	1.66926	0.737261	0.9117	1.06518	1.87595
RIPK2	Receptor-interacting serine/threonine-protein kinase 2	O43353	YES	YES	TQNILLDNEFHVK	149	1	0.88181	1.02211	0.904634	0.9951	0.884237	846039	0.1567	0.999983	0.86661
RIPK2	Receptor-interacting serine/threonine-protein kinase 2	O43353	YES	YES	LQPGIAQQWIQSK	431	1	1.08426	1.12488	1.14263	0.992321	1.20412	0.629825	0.3086	0.999889	1.21189
RIPK2	Receptor-interacting serine/threonine-protein kinase 2	O43353	YES	YES	SPSLNLLQNK	529	1	1.15344	1.08961	1.35732	1.283	1.49153	1.68367	0.8235	1.00343	1.54054
RIPK2	Receptor-interacting serine/threonine-protein kinase 2	O43353	YES	YES	LHHCPGNHSWDSTISGSQR	385	1	0.975611	0.669381	0.710375	0.771968	0.784215
RIPK2	Receptor-interacting serine/threonine-protein kinase 2	O43353	YES	YES	QLLDTTDIQGEEFAK	489	1	0.730092	0.720613	0.809294	0.677523	0.743875
RIPK2	Receptor-interacting serine/threonine-protein kinase 2	O43353	YES	YES	KTEYPDVAWPLR	110	1	0.613196	0.634494	0.876851	0.435428	0.76952	0.00629388	0.4534	0.32828	1.00374
BUB1	Mitotic checkpoint serine/threonine-protein kinase BUB1	O43683	YES	YES	MGPSVGSQQELR	325	1	0.881863	0.984056	1.09351	1.1627	1.14054	0.86511	0.8663	0.94462	1.15223
BUB1	Mitotic checkpoint serine/threonine-protein kinase BUB1	O43683	YES	YES	TSEPLHNVQVLNQMITSK	158	1	0.716321	1.06119	1.08884	1.02004	0.715053	0.0961871	0.036	0.840069	1.00041
BUB1	Mitotic checkpoint serine/threonine-protein kinase BUB1	O43683	YES	YES	GESEFSFEELR	245	1	0.895058	1.16215	0.935768	1.16304	0.830349	138.981	0.3473	-0.323178	1.0312
BUB1	Mitotic checkpoint serine/threonine-protein kinase BUB1	O43683	YES	YES	GIQNQAEPR	125	1	0.817763	1.09634	1.25788	1.36002	0.983467	0.168836	0.5247	0.908872	1.2005
BUB1	Mitotic checkpoint serine/threonine-protein kinase BUB1	O43683	YES	YES	FISYCLK	68	1	0.536225	0.58022	0.904792	0.641549	0.820144	18.0633	0.4303	1.00383	0.389656
BUB1	Mitotic checkpoint serine/threonine-protein kinase BUB1	O43683	YES	YES	VQKPANPWEFYIGTQLMER	822	1	0.0338316	0.429915	0.800967	0.942324	0.854585	1.56838	0.317	0.487679	0.898418
BUB1	Mitotic checkpoint serine/threonine-protein kinase BUB1	O43683	YES	YES	LIVLLLECKR	1073	1	1.05493	0.923662	0.182983	0.105364	0.204531	0.465695	0.9938	0.15535	1.02756
MAST3	Microtubule-associated serine/threonine-protein kinase 3	O60307	YES	YES	LALADGVLGFIHHQIVELAR	204	1	1.29334	1.07124	1.59406	0.914496	1.17173	0.611455	0.1216	1.41766	1.00015
MAST3	Microtubule-associated serine/threonine-protein kinase 3	O60307	YES	YES	LYFAETVLALEYLHNYGIVHR	469	1	0.997134	0.918134	0.830015	0.525339	0.373146	10.9495	0.9957	0.22967	0.995204
MAST3	Microtubule-associated serine/threonine-protein kinase 3	O60307	YES	YES	QHPFFLALDWAGLLR	636	1	1.63446	1.07685	1.31109	2.18066	1.04814	1.22408	0.1601	0.999966	1.89869
PIP5K1C	Phosphatidylinositol 4-phosphate 5-kinase type-1 gamma	O60331	NO	YES	VVVMNNILPR	235	1	0.984635	1.49689	1.58687	1.25047	0.733585	46.0476	0.4336	0.706057	1.26821
PIP5K1C	Phosphatidylinositol 4-phosphate 5-kinase type-1 gamma	O60331	NO	YES	ALYSTAMESIQGGAAR	352	1	0.682125	1.10932	0.965376	1.09349	0.851878	0.0651973	0.2754	0.841074	1.00501
[truncated: 67,073 more rows]
