# Supplementary material for: A Two-Dimensional Peptide-Centric Stability Assay Maps Multidimensional Target Landscapes Unveiling 17β-Estradiol (E2)-GPX4 Binding-Induced Ferroptosis
Source: Research Square preprint supplement (doi:10.21203/rs.3.rs-6893001/v1), 2025-07-04
Supplement: Supplementary file 8 [file 557cbd384e1b8c9ba355d612.xlsx]

## Sheet: parameter description
Supplementary table S6.
This file summarizes domain enrichment analysis for E2-responsive peptides in pfam database
Tab descriptions
A	Domain description_pfam	Summary of domain description for E2-responsive peptides
B	DomainEnrichment	Enriched domain annotation of E2-LRPs analyzed by one-sided Fisher's exact test (α=0.05) and Benjamini-Hochberg correction (α=0.05), and all the identified peptides were set as background reference.

## Sheet: Domain description_pFam
Gene.names	PG.ProteinDescriptions	Protein.IDs	Sequence	hmm name	type	clan_name	Pfam_description
YWHAG	14-3-3 protein gamma	P61981	NCSETQYESK	41701	Repeat	TPR	14-3-3 protein
YWHAE	14-3-3 protein epsilon	P62258	EAAENSLVAYK	41701	Repeat	TPR	14-3-3 protein
PLOD3	Multifunctional procollagen lysine hydroxylase and glycosyltransferase LH3	O60568	FLRYDCVISSPR	2OG-FeII_Oxy	Domain	Cupin	2OG-Fe(II) oxygenase superfamily
NSDHL	Sterol-4-alpha-carboxylate 3-dehydrogenase	Q15738	FFLGDLCSR	3Beta_HSD	Family	NADP_Rossmann	3-beta hydroxysteroid dehydrogenase/isomerase family
HADHA	Trifunctional enzyme subunit alpha	P40939	ILQEGVDPK	3HCDH	Domain	6PGD_C	3-hydroxyacyl-CoA dehydrogenase, C-terminal domain
HADHA	Trifunctional enzyme subunit alpha	P40939	FGGGNPELLTQMVSK	3HCDH	Domain	6PGD_C	3-hydroxyacyl-CoA dehydrogenase, C-terminal domain
HADHA	Trifunctional enzyme subunit alpha	P40939	HVAEDLGKVFGER	3HCDH	Domain	6PGD_C	3-hydroxyacyl-CoA dehydrogenase, C-terminal domain
HADHA	Trifunctional enzyme subunit alpha	P40939	FVDLYGAQK	3HCDH	Domain	6PGD_C	3-hydroxyacyl-CoA dehydrogenase, C-terminal domain
HADHA	Trifunctional enzyme subunit alpha	P40939	GFYIYQEGVK	3HCDH	Domain	6PGD_C	3-hydroxyacyl-CoA dehydrogenase, C-terminal domain
HADHA	Trifunctional enzyme subunit alpha	P40939	GFYIYQEGVKR	3HCDH	Domain	6PGD_C	3-hydroxyacyl-CoA dehydrogenase, C-terminal domain
HADHA	Trifunctional enzyme subunit alpha	P40939	SEVSSDEDIQFR	3HCDH	Domain	6PGD_C	3-hydroxyacyl-CoA dehydrogenase, C-terminal domain
HADHA	Trifunctional enzyme subunit alpha	P40939	DGPGFYTTR	3HCDH_N	Domain	NADP_Rossmann	3-hydroxyacyl-CoA dehydrogenase, NAD binding domain
HADHA	Trifunctional enzyme subunit alpha	P40939	DTSASAVAVGLK	3HCDH_N	Domain	NADP_Rossmann	3-hydroxyacyl-CoA dehydrogenase, NAD binding domain
HADHA	Trifunctional enzyme subunit alpha	P40939	TSKDTSASAVAVGLK	3HCDH_N	Domain	NADP_Rossmann	3-hydroxyacyl-CoA dehydrogenase, NAD binding domain
HADHA	Trifunctional enzyme subunit alpha	P40939	DATLTALDRGQQQVFK	3HCDH_N	Domain	NADP_Rossmann	3-hydroxyacyl-CoA dehydrogenase, NAD binding domain
HADHA	Trifunctional enzyme subunit alpha	P40939	TILKDATLTALDR	3HCDH_N	Domain	NADP_Rossmann	3-hydroxyacyl-CoA dehydrogenase, NAD binding domain
HADHA	Trifunctional enzyme subunit alpha	P40939	DTSASAVAVGLKQGK	3HCDH_N	Domain	NADP_Rossmann	3-hydroxyacyl-CoA dehydrogenase, NAD binding domain
HADHA	Trifunctional enzyme subunit alpha	P40939	ALTSFER	3HCDH_N	Domain	NADP_Rossmann	3-hydroxyacyl-CoA dehydrogenase, NAD binding domain
HADHA	Trifunctional enzyme subunit alpha	P40939	VIGMHYFSPVDKMQLLEIITTEK	3HCDH_N	Domain	NADP_Rossmann	3-hydroxyacyl-CoA dehydrogenase, NAD binding domain
HADHA	Trifunctional enzyme subunit alpha	P40939	TILKDATLTALDRGQQQVFK	3HCDH_N	Domain	NADP_Rossmann	3-hydroxyacyl-CoA dehydrogenase, NAD binding domain
HADHA	Trifunctional enzyme subunit alpha	P40939	DATLTALDR	3HCDH_N	Domain	NADP_Rossmann	3-hydroxyacyl-CoA dehydrogenase, NAD binding domain
HADHA	Trifunctional enzyme subunit alpha	P40939	MQLLEIITTEKTSK	3HCDH_N	Domain	NADP_Rossmann	3-hydroxyacyl-CoA dehydrogenase, NAD binding domain
HADHA	Trifunctional enzyme subunit alpha	P40939	VIGMHYFSPVDK	3HCDH_N	Domain	NADP_Rossmann	3-hydroxyacyl-CoA dehydrogenase, NAD binding domain
HADHA	Trifunctional enzyme subunit alpha	P40939	HLAILGAGLMGAGIAQVSVDKGLK	3HCDH_N	Domain	NADP_Rossmann	3-hydroxyacyl-CoA dehydrogenase, NAD binding domain
HADHA	Trifunctional enzyme subunit alpha	P40939	VIIVVKDGPGFYTTR	3HCDH_N	Domain	NADP_Rossmann	3-hydroxyacyl-CoA dehydrogenase, NAD binding domain
HNRNPU	Heterogeneous nuclear ribonucleoprotein U	Q00839	APQCLGKFIEIAAR	AAA_33	Domain	P-loop_NTPase	AAA domain
HNRNPU	Heterogeneous nuclear ribonucleoprotein U	Q00839	RKMCLFAGFQR	AAA_33	Domain	P-loop_NTPase	AAA domain
MDN1	Midasin	Q9NU22	LFACMNPATDVGKR	AAA_5	Domain	P-loop_NTPase	AAA domain (dynein-related subfamily)
AAR2	Protein AAR2 homolog	Q9Y312	LPEMKPR	AAR2	Repeat	TPR	AAR2 protein
AAR2	Protein AAR2 homolog	Q9Y312	QICAFSDVLPVLSMK	AAR2	Repeat	TPR	AAR2 protein
ACSS2	Acetyl-coenzyme A synthetase	Q9NR19	GATTNICYNVLDR	ACAS_N	Family	ANL	Acetyl-coenzyme A synthetase N-terminus
ACTR3B	Actin-related protein 3B	Q9P1U1	KFVIDVGYER	Actin	Family	Actin_ATPase	Actin
ACAD9	Complex I assembly factor ACAD9	Q9H845	FSMGSVVAGLLKR	Acyl-CoA_dh_1	Domain	Acyl-CoA_dh	Acyl-CoA dehydrogenase, C-terminal domain
ACAD9	Complex I assembly factor ACAD9	Q9H845	FFTEEVDSR	Acyl-CoA_dh_N	Domain	AcylCoA_ox_dh_N	Acyl-CoA dehydrogenase, N-terminal domain
ACAD9	Complex I assembly factor ACAD9	Q9H845	LASGEHIAAFCLTEPASGSDAASIR	Acyl-CoA_dh_N	Domain	AcylCoA_ox_dh_N	Acyl-CoA dehydrogenase, N-terminal domain
ACOT1	Acyl-coenzyme A thioesterase 1	Q86TX2	GLAPEQPVTLR	Bile_Hydr_Trans	Family	E-set	Acyl-CoA thioester hydrolase/BAAT N-terminal region
ACOT1	Acyl-coenzyme A thioesterase 1	Q86TX2	GALFQAHAR	Bile_Hydr_Trans	Family	E-set	Acyl-CoA thioester hydrolase/BAAT N-terminal region
AP3D1	AP-3 complex subunit delta-1	O14617	NYLSLAPLFFK	Adaptin_N	Repeat	TPR	Adaptin N terminal region
AK2	Adenylate kinase 2	P54819	KEKLDSVIEFSIPDSLLIR	ADK	Domain	P-loop_NTPase	Adenylate kinase
SAR1A	GTP-binding protein SAR1a	Q9NR31	QGYGEGFR	Arf	Domain	P-loop_NTPase	ADP-ribosylation factor family
SAR1B	GTP-binding protein SAR1b	Q9Y6B6	IDRPEAISEER	Arf	Domain	P-loop_NTPase	ADP-ribosylation factor family
ALDH4A1	Delta-1-pyrroline-5-carboxylate dehydrogenase	P30038	VAKFCYADK	Aldedh	Family	ALDH-like	Aldehyde dehydrogenase family
ALDH6A1	Methylmalonate-semialdehyde/malonate-semialdehyde dehydrogenase [acylating]	Q02252	VCNLIDSGTKEGASILLDGR	Aldedh	Family	ALDH-like	Aldehyde dehydrogenase family
ALDH7A1	Alpha-aminoadipic semialdehyde dehydrogenase	P49419	VNLLSFTGSTQVGK	Aldedh	Family	ALDH-like	Aldehyde dehydrogenase family
ALDH6A1	Methylmalonate-semialdehyde/malonate-semialdehyde dehydrogenase [acylating]	Q02252	YQQLIKENLK	Aldedh	Family	ALDH-like	Aldehyde dehydrogenase family
KYAT3	Kynurenine--oxoglutarate transaminase 3	Q6YP21	KLSAIPVSAFCNSETK	Aminotran_1_2	Domain	PLP_aminotran	Aminotransferase class I and II
ACSF2	Medium-chain acyl-CoA ligase ACSF2	Q96CM8	GYCVMLGYWGEPQK	AMP-binding	Family	ANL	AMP-binding enzyme
ACSF2	Medium-chain acyl-CoA ligase ACSF2	Q96CM8	LNTPGELCIR	AMP-binding	Family	ANL	AMP-binding enzyme
ACSS2	Acetyl-coenzyme A synthetase	Q9NR19	FYTAPTAIR	AMP-binding	Family	ANL	AMP-binding enzyme
AACS	Acetoacetyl-CoA synthetase	Q86V21	SDGTLNPNGVR	AMP-binding	Family	ANL	AMP-binding enzyme
GET3	ATPase GET3	O43681	LEETLPVIR	ArsA_ATPase	Domain	P-loop_NTPase	Anion-transporting ATPase
ANK3	Ankyrin-3	Q12955	YLVQDGAQVEAK	Ank_2	Repeat	Ank	Ankyrin repeats (3 copies)
MARS1	Methionine--tRNA ligase	P56192	LENDQIESLR	Anticodon_3	Domain	DALR	Anticodon binding domain of methionyl tRNA ligase
MARS1	Methionine--tRNA ligase	P56192	HGNQYIQVNEPWKR	Anticodon_3	Domain	DALR	Anticodon binding domain of methionyl tRNA ligase
LARS1	Leucine--tRNA ligase	Q9P2J5	VFASELNAGIIK	Anticodon_1	Domain	DALR	Anticodon-binding domain of tRNA ligase
LARS1	Leucine--tRNA ligase	Q9P2J5	SGPASTFNDRVFASELNAGIIK	Anticodon_1	Domain	DALR	Anticodon-binding domain of tRNA ligase
LARS1	Leucine--tRNA ligase	Q9P2J5	TGFFEFQAAKDKYR	Anticodon_1	Domain	DALR	Anticodon-binding domain of tRNA ligase
API5	Apoptosis inhibitor 5	Q9BZZ5	QAVPLFSK	API5	Repeat	TPR	Apoptosis inhibitory protein 5 (API5)
BAX	Apoptosis regulator BAX	Q07812	IGDELDSNMELQR	Bcl-2	Family	BCLiA	Apoptosis regulator proteins, Bcl-2 family
AIFM1	Apoptosis-inducing factor 1	O95831	SATEQSGTGIR	AIF_C	Domain	Reductase_C	Apoptosis-inducing factor, mitochondrion-associated, C-term
ARFIP2	Arfaptin-2	P53365	TMEDTLMTVK	Arfaptin	Domain	Golgi-transport	Arfaptin-like domain
ARFIP2	Arfaptin-2	P53365	LEYDAYRTDLEELSLGPR	Arfaptin	Domain	Golgi-transport	Arfaptin-like domain
ASS1	Argininosuccinate synthase	P00966	FAELVYTGFWHSPECEFVR	Arginosuc_synth	Family	HUP	Arginosuccinate synthase
ASS1	Argininosuccinate synthase	P00966	GQVYILGR	Arginosuc_synth	Family	HUP	Arginosuccinate synthase
ASS1	Argininosuccinate synthase	P00966	IDIVENR	Arginosuc_synth	Family	HUP	Arginosuccinate synthase
ASS1	Argininosuccinate synthase	P00966	MPEFYNR	Arginosuc_synth	Family	HUP	Arginosuccinate synthase
ASS1	Argininosuccinate synthase	P00966	FELSCYSLAPQIK	Arginosuc_synth	Family	HUP	Arginosuccinate synthase
ASS1	Argininosuccinate synthase	P00966	NQAPPGLYTK	Arginosuc_synth	Family	HUP	Arginosuccinate synthase
ASS1	Argininosuccinate synthase	P00966	QHGIPIPVTPK	Arginosuc_synth	Family	HUP	Arginosuccinate synthase
ARMC6	Armadillo repeat-containing protein 6	Q6NXE6	AGVLPLLTGAITHHGHHTDVVR	Arm	Repeat	TPR	Armadillo/beta-catenin-like repeat
ATP6V1A	V-type proton ATPase catalytic subunit A	P38606	LASFYER	ATP-synt_ab	Domain	P-loop_NTPase	ATP synthase alpha/beta family, nucleotide-binding domain
VCP	Transitional endoplasmic reticulum ATPase	P55072	NVFIIGATNRPDIIDPAILRPGR	AAA	Domain	P-loop_NTPase	ATPase family associated with various cellular activities (AAA)
LONP1	Lon protease homolog	P36776	TENPLILIDEVDKIGR	AAA	Domain	P-loop_NTPase	ATPase family associated with various cellular activities (AAA)
DYNC1H1	Cytoplasmic dynein 1 heavy chain 1	Q14204	ILDDDTIITTLENLKR	AAA_9	Domain	P-loop_NTPase	ATP-binding dynein motor region
ACOT1	Acyl-coenzyme A thioesterase 1	Q86TX2	SFIPVER	BAAT_C	Domain	AB_hydrolase	BAAT / Acyl-CoA thioester hydrolase C terminal
ACOT1	Acyl-coenzyme A thioesterase 1	Q86TX2	ASLHALVGSPIIWGGEPR	BAAT_C	Domain	AB_hydrolase	BAAT / Acyl-CoA thioester hydrolase C terminal
ACOT1	Acyl-coenzyme A thioesterase 1	Q86TX2	GPGVGLLGISK	BAAT_C	Domain	AB_hydrolase	BAAT / Acyl-CoA thioester hydrolase C terminal
ACOT1	Acyl-coenzyme A thioesterase 1	Q86TX2	SEFYANEACKR	BAAT_C	Domain	AB_hydrolase	BAAT / Acyl-CoA thioester hydrolase C terminal
ACOT1	Acyl-coenzyme A thioesterase 1	Q86TX2	AESTFLFLVGQDDHNWK	BAAT_C	Domain	AB_hydrolase	BAAT / Acyl-CoA thioester hydrolase C terminal
ACOT1	Acyl-coenzyme A thioesterase 1	Q86TX2	GGELCLSMASFLK	BAAT_C	Domain	AB_hydrolase	BAAT / Acyl-CoA thioester hydrolase C terminal
OGA	Protein O-GlcNAcase	O60502	LFLGPYK	NAGidase	Family	Glyco_hydro_tim	beta-N-acetylglucosaminidase
BLVRA	Biliverdin reductase A	P53004	SGSLENVPNVGVNK	Biliv-reduc_cat	Domain	GADPH_aa-bio_dh	Biliverdin reductase, catalytic
MCCC1	Methylcrotonoyl-CoA carboxylase subunit alpha	Q96RQ3	LVVWAADR	Biotin_carb_C	Domain	Hybrid	Biotin carboxylase C-terminal domain
MCCC1	Methylcrotonoyl-CoA carboxylase subunit alpha	Q96RQ3	VLIANRGEIACR	Biotin_carb_N	Domain	PreATP-grasp	Biotin carboxylase, N-terminal domain
MCCC1	Methylcrotonoyl-CoA carboxylase subunit alpha	Q96RQ3	QEGIIFIGPPPSAIR	Biotin_carb_N	Domain	PreATP-grasp	Biotin carboxylase, N-terminal domain
PDCD6IP	Programmed cell death 6-interacting protein	Q8WUM4	FGEEIAR	BRO1	Repeat	TPR	BRO1-like domain
PDCD6IP	Programmed cell death 6-interacting protein	Q8WUM4	LALASLGYEK	BRO1	Repeat	TPR	BRO1-like domain
CPNE3	Copine-3	O75131	ISLNSLCYGDMDK	C2	Domain	C2	C2 domain
ESYT1	Extended synaptotagmin-1	Q9BSJ8	IHVLEAQDLIAKDR	C2	Domain	C2	C2 domain
DOCK6	Dedicator of cytokinesis protein 6	Q96HP0	EVYAPHTSYR	DOCK-C2	Domain	C2	C2 domain in Dock180 and Zizimin proteins
ACTN4	Alpha-actinin-4	O43707	VLAGDKNFITAEELR	EFhand_Ca_insen	Domain	EF_hand	Ca2+ insensitive EF hand
DSG2	Desmoglein-2	Q14126	SSKGQIIGNFQAFDEDTGLPAHAR	Cadherin	Domain	E-set	Cadherin domain
PLEC	Plectin	Q15149	MVEGYQGLR	CH	Domain	CH	Calponin homology (CH) domain
MCCC1	Methylcrotonoyl-CoA carboxylase subunit alpha	Q96RQ3	HNFCFMEMNTR	CPSase_L_D2	Domain	ATP-grasp	Carbamoyl-phosphate synthase L chain, ATP binding domain
MCCC1	Methylcrotonoyl-CoA carboxylase subunit alpha	Q96RQ3	HVEVQVFGDHHGNAVYLFER	CPSase_L_D2	Domain	ATP-grasp	Carbamoyl-phosphate synthase L chain, ATP binding domain
MCCC1	Methylcrotonoyl-CoA carboxylase subunit alpha	Q96RQ3	IGYPVMIK	CPSase_L_D2	Domain	ATP-grasp	Carbamoyl-phosphate synthase L chain, ATP binding domain
MCCC1	Methylcrotonoyl-CoA carboxylase subunit alpha	Q96RQ3	IIEEAPAPGIK	CPSase_L_D2	Domain	ATP-grasp	Carbamoyl-phosphate synthase L chain, ATP binding domain
MCCC1	Methylcrotonoyl-CoA carboxylase subunit alpha	Q96RQ3	KSFNDDAMLIEK	CPSase_L_D2	Domain	ATP-grasp	Carbamoyl-phosphate synthase L chain, ATP binding domain
MCCC1	Methylcrotonoyl-CoA carboxylase subunit alpha	Q96RQ3	SEQEFQEQLESARR	CPSase_L_D2	Domain	ATP-grasp	Carbamoyl-phosphate synthase L chain, ATP binding domain
MCCC1	Methylcrotonoyl-CoA carboxylase subunit alpha	Q96RQ3	IAAGEKIPLSQEEITLQGHAFEAR	CPSase_L_D2	Domain	ATP-grasp	Carbamoyl-phosphate synthase L chain, ATP binding domain
MCCC1	Methylcrotonoyl-CoA carboxylase subunit alpha	Q96RQ3	IIEEAPAPGIKSEVR	CPSase_L_D2	Domain	ATP-grasp	Carbamoyl-phosphate synthase L chain, ATP binding domain
MCCC1	Methylcrotonoyl-CoA carboxylase subunit alpha	Q96RQ3	SEQEFQEQLESAR	CPSase_L_D2	Domain	ATP-grasp	Carbamoyl-phosphate synthase L chain, ATP binding domain
PYGB	Glycogen phosphorylase	P11216	ARPEYMLPVHFYGR	Phosphorylase	Family	GT-B	Carbohydrate phosphorylase
ACACA	Acetyl-CoA carboxylase 1	Q13085	YLYLTPQDYKR	Carboxyl_trans	Family	ClpP_crotonase	Carboxyl transferase domain
ACACA	Acetyl-CoA carboxylase 1	Q13085	GGSWVVIDSSINPR	Carboxyl_trans	Family	ClpP_crotonase	Carboxyl transferase domain
ACACA	Acetyl-CoA carboxylase 1	Q13085	LLLEDLVK	Carboxyl_trans	Family	ClpP_crotonase	Carboxyl transferase domain
ACACA	Acetyl-CoA carboxylase 1	Q13085	TIQVENSHLILTGAGALNK	Carboxyl_trans	Family	ClpP_crotonase	Carboxyl transferase domain
ACACA	Acetyl-CoA carboxylase 1	Q13085	IYVSANSGAR	Carboxyl_trans	Family	ClpP_crotonase	Carboxyl transferase domain
ACACA	Acetyl-CoA carboxylase 1	Q13085	HMEMYADR	Carboxyl_trans	Family	ClpP_crotonase	Carboxyl transferase domain
ACACA	Acetyl-CoA carboxylase 1	Q13085	IGLAEEIR	Carboxyl_trans	Family	ClpP_crotonase	Carboxyl transferase domain
ACACA	Acetyl-CoA carboxylase 1	Q13085	LGTPELSTAERK	Carboxyl_trans	Family	ClpP_crotonase	Carboxyl transferase domain
ACACA	Acetyl-CoA carboxylase 1	Q13085	RLLLEDLVK	Carboxyl_trans	Family	ClpP_crotonase	Carboxyl transferase domain
ACACA	Acetyl-CoA carboxylase 1	Q13085	LGGIPVGVVAVETR	Carboxyl_trans	Family	ClpP_crotonase	Carboxyl transferase domain
ACACA	Acetyl-CoA carboxylase 1	Q13085	LGTPELSTAER	Carboxyl_trans	Family	ClpP_crotonase	Carboxyl transferase domain
ACACA	Acetyl-CoA carboxylase 1	Q13085	LLLEDLVKK	Carboxyl_trans	Family	ClpP_crotonase	Carboxyl transferase domain
ACACA	Acetyl-CoA carboxylase 1	Q13085	EEGIGPENLR	Carboxyl_trans	Family	ClpP_crotonase	Carboxyl transferase domain
ACACA	Acetyl-CoA carboxylase 1	Q13085	TVELSIPADPANLDSEAK	Carboxyl_trans	Family	ClpP_crotonase	Carboxyl transferase domain
CES2	Cocaine esterase	O00748	ADHGDELPFVFR	COesterase	Domain	AB_hydrolase	Carboxylesterase family
CES2	Cocaine esterase	O00748	GANAGVQTFLGIPFAKPPLGPLR	COesterase	Domain	AB_hydrolase	Carboxylesterase family
CES2	Cocaine esterase	O00748	SFFGGNYIKFTEEEEQLSR	COesterase	Domain	AB_hydrolase	Carboxylesterase family
ATP2A3	Sarcoplasmic/endoplasmic reticulum calcium ATPase 3	Q93084	MNVFDTDLQALSR	Cation_ATPase	Family	HAD	Cation transport ATPase (P-type)
CRAT	Carnitine O-acetyltransferase	P43155	LPVPPLQQSLDHYLK	Carn_acyltransf	Family	CoA-acyltrans	Choline/Carnitine o-acyltransferase
MMAB	Corrinoid adenosyltransferase MMAB	Q96EY8	LSDYLFTLAR	Cob_adeno_trans	Domain	Cob_adeno_trans	Cobalamin adenosyltransferase
TWF1	Twinfilin-1	Q12792	MLYAATR	Cofilin_ADF	Domain	ADF	Cofilin/tropomyosin-type actin-binding protein
H2AC4	Histone H2A type 1-B/E	P04908	HLQLAIRNDEELNKLLGR	Histone	Domain	Histone	Core histone H2A/H2B/H3/H4
MACROH2A1	Core histone macro-H2A	O75367	AGVIFPVGR	Histone	Domain	Histone	Core histone H2A/H2B/H3/H4
CPSF1	Cleavage and polyadenylation specificity factor subunit 1	Q10570	IFLWSLR	CPSF_A	Repeat	Beta_propeller	CPSF A subunit region
PTGES3	Prostaglandin E synthase 3	Q15185	SILCCLRKGESGQSWPR	CS	Domain	HSP20	CS domain
CSE1L	Exportin-2	P55060	AACDLVR	Cse1	Repeat	TPR	Cse1
CSE1L	Exportin-2	P55060	DLEGSDIDTR	Cse1	Repeat	TPR	Cse1
CSE1L	Exportin-2	P55060	DLEGSDIDTRR	Cse1	Repeat	TPR	Cse1
CSE1L	Exportin-2	P55060	HKDAAIYLVTSLASK	Cse1	Repeat	TPR	Cse1
CSE1L	Exportin-2	P55060	AADEEAFEDNSEEYIRR	Cse1	Repeat	TPR	Cse1
CTPS2	CTP synthase 2	Q9NRF8	SSTPIEMAVK	CTP_synth_N	Domain	P-loop_NTPase	CTP synthase N-terminus
CUL4A	Cullin-4A	Q13619	LPDNYTQDTWR	Cullin	Repeat	TPR	Cullin family
CUL3	Cullin-3	Q13618	NAIQEIQR	Cullin	Repeat	TPR	Cullin family
CUL1	Cullin-1	Q13616	QIGLDQIWDDLR	Cullin	Repeat	TPR	Cullin family
TKFC	Triokinase/FMN cyclase	Q3LXA3	AVAQAGTVGTLLIVK	Dak1	Family	EDD	Dak1 domain
TKFC	Triokinase/FMN cyclase	Q3LXA3	LVNSVAGCADDALAGLVACNPNLQLLQGHR	Dak1	Family	EDD	Dak1 domain
RARS2	Probable arginine--tRNA ligase	Q5T160	FDEVLYK	DALR_1	Domain	DALR	DALR anticodon binding domain
RARS1	Arginine--tRNA ligase	P54136	GFDILGIKPVQR	DALR_1	Domain	DALR	DALR anticodon binding domain
RARS2	Probable arginine--tRNA ligase	Q5T160	LLGITPVCR	DALR_1	Domain	DALR	DALR anticodon binding domain
DDX39B	Spliceosome RNA helicase DDX39B	Q13838	HFILDECDKMLEQLDMRR	DEAD	Domain	P-loop_NTPase	DEAD/DEAH box helicase
DDX1	ATP-dependent RNA helicase DDX1	Q92499	ELAEQTLNNIK	DEAD	Domain	P-loop_NTPase	DEAD/DEAH box helicase
DDX1	ATP-dependent RNA helicase DDX1	Q92499	FLPNAPK	DEAD	Domain	P-loop_NTPase	DEAD/DEAH box helicase
DDX1	ATP-dependent RNA helicase DDX1	Q92499	MHNQIPQVTSDGKR	DEAD	Domain	P-loop_NTPase	DEAD/DEAH box helicase
DDX1	ATP-dependent RNA helicase DDX1	Q92499	ALIVEPSR	DEAD	Domain	P-loop_NTPase	DEAD/DEAH box helicase
DDX1	ATP-dependent RNA helicase DDX1	Q92499	LRELLIIGGVAAR	DEAD	Domain	P-loop_NTPase	DEAD/DEAH box helicase
EIF4A1	Eukaryotic initiation factor 4A-I	P60842	GYDVIAQAQSGTGK	DEAD	Domain	P-loop_NTPase	DEAD/DEAH box helicase
DDX1	ATP-dependent RNA helicase DDX1	Q92499	RLQVIVCSATLHSFDVK	DEAD	Domain	P-loop_NTPase	DEAD/DEAH box helicase
DDX1	ATP-dependent RNA helicase DDX1	Q92499	TGAFSIPVIQIVYETLKDQQEGKK	DEAD	Domain	P-loop_NTPase	DEAD/DEAH box helicase
EIF4A1	Eukaryotic initiation factor 4A-I	P60842	AEVQKLQMEAPHIIVGTPGR	DEAD	Domain	P-loop_NTPase	DEAD/DEAH box helicase
DDX6	Probable ATP-dependent RNA helicase DDX6	P26196	SGAYLIPLLER	DEAD	Domain	P-loop_NTPase	DEAD/DEAH box helicase
EIF4A1	Eukaryotic initiation factor 4A-I	P60842	LQMEAPHIIVGTPGR	DEAD	Domain	P-loop_NTPase	DEAD/DEAH box helicase
DDX1	ATP-dependent RNA helicase DDX1	Q92499	ELLIIGGVAAR	DEAD	Domain	P-loop_NTPase	DEAD/DEAH box helicase
EIF4A1	Eukaryotic initiation factor 4A-I	P60842	ATQALVLAPTR	DEAD	Domain	P-loop_NTPase	DEAD/DEAH box helicase
DDX1	ATP-dependent RNA helicase DDX1	Q92499	MHNQIPQVTSDGK	DEAD	Domain	P-loop_NTPase	DEAD/DEAH box helicase
EIF4A1	Eukaryotic initiation factor 4A-I	P60842	AILPCIK	DEAD	Domain	P-loop_NTPase	DEAD/DEAH box helicase
EIF4A1	Eukaryotic initiation factor 4A-I	P60842	LNSNTQVVLLSATMPSDVLEVTK	DEAD	Domain	P-loop_NTPase	DEAD/DEAH box helicase
EIF4A1	Eukaryotic initiation factor 4A-I	P60842	GIYAYGFEKPSAIQQR	DEAD	Domain	P-loop_NTPase	DEAD/DEAH box helicase
EIF4A1	Eukaryotic initiation factor 4A-I	P60842	AILPCIKGYDVIAQAQSGTGK	DEAD	Domain	P-loop_NTPase	DEAD/DEAH box helicase
DDX1	ATP-dependent RNA helicase DDX1	Q92499	LQVIVCSATLHSFDVK	DEAD	Domain	P-loop_NTPase	DEAD/DEAH box helicase
DDX1	ATP-dependent RNA helicase DDX1	Q92499	ALIVEPSRELAEQTLNNIK	DEAD	Domain	P-loop_NTPase	DEAD/DEAH box helicase
EIF4A1	Eukaryotic initiation factor 4A-I	P60842	ELAQQIQK	DEAD	Domain	P-loop_NTPase	DEAD/DEAH box helicase
EIF4A1	Eukaryotic initiation factor 4A-I	P60842	MFVLDEADEMLSR	DEAD	Domain	P-loop_NTPase	DEAD/DEAH box helicase
EIF4A1	Eukaryotic initiation factor 4A-I	P60842	VFDMLNRR	DEAD	Domain	P-loop_NTPase	DEAD/DEAH box helicase
DDX1	ATP-dependent RNA helicase DDX1	Q92499	LQVIVCSATLHSFDVKK	DEAD	Domain	P-loop_NTPase	DEAD/DEAH box helicase
DDX1	ATP-dependent RNA helicase DDX1	Q92499	DQLSVLENGVDIVVGTPGR	DEAD	Domain	P-loop_NTPase	DEAD/DEAH box helicase
DDX1	ATP-dependent RNA helicase DDX1	Q92499	DQLSVLENGVDIVVGTPGRLDDLVSTGK	DEAD	Domain	P-loop_NTPase	DEAD/DEAH box helicase
EIF4A1	Eukaryotic initiation factor 4A-I	P60842	GFKDQIYDIFQK	DEAD	Domain	P-loop_NTPase	DEAD/DEAH box helicase
EIF4A1	Eukaryotic initiation factor 4A-I	P60842	DQIYDIFQK	DEAD	Domain	P-loop_NTPase	DEAD/DEAH box helicase
DDX1	ATP-dependent RNA helicase DDX1	Q92499	FLVLDEADGLLSQGYSDFINR	DEAD	Domain	P-loop_NTPase	DEAD/DEAH box helicase
EIF4A1	Eukaryotic initiation factor 4A-I	P60842	ATQALVLAPTRELAQQIQK	DEAD	Domain	P-loop_NTPase	DEAD/DEAH box helicase
DDX1	ATP-dependent RNA helicase DDX1	Q92499	LDDLVSTGKLNLSQVR	DEAD	Domain	P-loop_NTPase	DEAD/DEAH box helicase
CASP8	Caspase-8	Q14790	FLSLDYIPQRK	DED	Domain	Death	Death effector domain
DCK	Deoxycytidine kinase	P27707	QLCEDWEVVPEPVAR	dNK	Domain	P-loop_NTPase	Deoxynucleoside kinase
POLD2	DNA polymerase delta subunit 2	P49005	CCVVGTLFK	DNA_pol_D_N	Domain	OB	DNA polymerase delta subunit OB-fold domain
POLE	DNA polymerase epsilon catalytic subunit A	Q07864	EGFTNDQYQELAEPSSLTYVTR	DNA_pol_B	Family	DNA_pol_B-like	DNA polymerase family B
PRKDC	DNA-dependent protein kinase catalytic subunit	P78527	VLEQLIVAHFPMQSR	DNAPKcs_CC1-2	Domain	TPR	DNA-dependent protein kinase catalytic subunit, CC1/2
PRKDC	DNA-dependent protein kinase catalytic subunit	P78527	DLCNTHLMR	DNAPKcs_CC1-2	Domain	TPR	DNA-dependent protein kinase catalytic subunit, CC1/2
PRKDC	DNA-dependent protein kinase catalytic subunit	P78527	MVSAVLNGMLDQSFRER	DNAPKcs_CC1-2	Domain	TPR	DNA-dependent protein kinase catalytic subunit, CC1/2
PRKDC	DNA-dependent protein kinase catalytic subunit	P78527	TSPQEGERYNYSK	DNAPKcs_CC1-2	Domain	TPR	DNA-dependent protein kinase catalytic subunit, CC1/2
PRKDC	DNA-dependent protein kinase catalytic subunit	P78527	LACDVDQVTR	DNAPKcs_CC1-2	Domain	TPR	DNA-dependent protein kinase catalytic subunit, CC1/2
PRKDC	DNA-dependent protein kinase catalytic subunit	P78527	TFPVLLR	DNAPKcs_CC1-2	Domain	TPR	DNA-dependent protein kinase catalytic subunit, CC1/2
PRKDC	DNA-dependent protein kinase catalytic subunit	P78527	WLLAHCGRPQTECR	DNAPKcs_CC1-2	Domain	TPR	DNA-dependent protein kinase catalytic subunit, CC1/2
PRKDC	DNA-dependent protein kinase catalytic subunit	P78527	CFGTGAAGNR	DNAPKcs_CC1-2	Domain	TPR	DNA-dependent protein kinase catalytic subunit, CC1/2
PRKDC	DNA-dependent protein kinase catalytic subunit	P78527	LATTILQHWK	DNAPKcs_CC1-2	Domain	TPR	DNA-dependent protein kinase catalytic subunit, CC1/2
PRKDC	DNA-dependent protein kinase catalytic subunit	P78527	FVPLLPGNR	DNAPKcs_CC1-2	Domain	TPR	DNA-dependent protein kinase catalytic subunit, CC1/2
PRKDC	DNA-dependent protein kinase catalytic subunit	P78527	QCLPSLDLSCK	DNAPKcs_CC1-2	Domain	TPR	DNA-dependent protein kinase catalytic subunit, CC1/2
PRKDC	DNA-dependent protein kinase catalytic subunit	P78527	MSPYKDILETHLR	DNAPKcs_CC1-2	Domain	TPR	DNA-dependent protein kinase catalytic subunit, CC1/2
PRKDC	DNA-dependent protein kinase catalytic subunit	P78527	FNNYVDCMKK	DNAPKcs_CC1-2	Domain	TPR	DNA-dependent protein kinase catalytic subunit, CC1/2
PRKDC	DNA-dependent protein kinase catalytic subunit	P78527	SIELFYK	DNAPKcs_CC1-2	Domain	TPR	DNA-dependent protein kinase catalytic subunit, CC1/2
PRKDC	DNA-dependent protein kinase catalytic subunit	P78527	LGASLAFNNIYR	DNAPKcs_CC1-2	Domain	TPR	DNA-dependent protein kinase catalytic subunit, CC1/2
PRKDC	DNA-dependent protein kinase catalytic subunit	P78527	GIAPGDER	DNAPKcs_CC1-2	Domain	TPR	DNA-dependent protein kinase catalytic subunit, CC1/2
PRKDC	DNA-dependent protein kinase catalytic subunit	P78527	LAAVVSACK	DNAPKcs_CC1-2	Domain	TPR	DNA-dependent protein kinase catalytic subunit, CC1/2
PRKDC	DNA-dependent protein kinase catalytic subunit	P78527	LGNPIVPLNIR	DNAPKcs_CC3	Domain	TPR	DNA-dependent protein kinase catalytic subunit, CC3
PRKDC	DNA-dependent protein kinase catalytic subunit	P78527	RYNFPVEVEVPMER	DNAPKcs_CC3	Domain	TPR	DNA-dependent protein kinase catalytic subunit, CC3
PRKDC	DNA-dependent protein kinase catalytic subunit	P78527	SLGPPQGEEDSVPR	DNAPKcs_CC3	Domain	TPR	DNA-dependent protein kinase catalytic subunit, CC3
PRKDC	DNA-dependent protein kinase catalytic subunit	P78527	LNESTFDTQITKK	DNAPKcs_CC3	Domain	TPR	DNA-dependent protein kinase catalytic subunit, CC3
PRKDC	DNA-dependent protein kinase catalytic subunit	P78527	LVINTEEVFRPYAK	DNAPKcs_CC3	Domain	TPR	DNA-dependent protein kinase catalytic subunit, CC3
PRKDC	DNA-dependent protein kinase catalytic subunit	P78527	INQVFHGSCITEGNELTK	DNAPKcs_CC3	Domain	TPR	DNA-dependent protein kinase catalytic subunit, CC3
PRKDC	DNA-dependent protein kinase catalytic subunit	P78527	ILDVMYSR	DNAPKcs_CC3	Domain	TPR	DNA-dependent protein kinase catalytic subunit, CC3
PRKDC	DNA-dependent protein kinase catalytic subunit	P78527	LCYDAFTENMAGENQLLERR	DNAPKcs_CC3	Domain	TPR	DNA-dependent protein kinase catalytic subunit, CC3
PRKDC	DNA-dependent protein kinase catalytic subunit	P78527	LNESTFDTQITK	DNAPKcs_CC3	Domain	TPR	DNA-dependent protein kinase catalytic subunit, CC3
POLR1G	DNA-directed RNA polymerase I subunit RPA34	O15446	HVPLSGSQIVK	RNA_polI_A34	Family	Triple_barrel	DNA-directed RNA polymerase I subunit RPA34.5
PRKDC	DNA-dependent protein kinase catalytic subunit	P78527	NILEESLCELVAK	DNAPKcs_CC5	Family	TPR	DNA-PKcs, CC5
PRKDC	DNA-dependent protein kinase catalytic subunit	P78527	HGDLPDIQIK	DNAPKcs_CC5	Family	TPR	DNA-PKcs, CC5
PRKDC	DNA-dependent protein kinase catalytic subunit	P78527	HSSLITPLQAVAQRDPIIAK	DNAPKcs_CC5	Family	TPR	DNA-PKcs, CC5
PRKDC	DNA-dependent protein kinase catalytic subunit	P78527	ELLNPVVEFVSHPSTTCR	DNAPKcs_CC5	Family	TPR	DNA-PKcs, CC5
PRKDC	DNA-dependent protein kinase catalytic subunit	P78527	LLALNSLYSPK	DNAPKcs_CC5	Family	TPR	DNA-PKcs, CC5
PRKDC	DNA-dependent protein kinase catalytic subunit	P78527	VCLDIIYK	DNAPKcs_CC5	Family	TPR	DNA-PKcs, CC5
PRKDC	DNA-dependent protein kinase catalytic subunit	P78527	VVQMLGSLGGQINK	DNA-PKcs_N	Domain	TPR	DNA-PKcs, N-terminal
PRKDC	DNA-dependent protein kinase catalytic subunit	P78527	IRVVQMLGSLGGQINK	DNA-PKcs_N	Domain	TPR	DNA-PKcs, N-terminal
PRKDC	DNA-dependent protein kinase catalytic subunit	P78527	FLCIFLEK	DNA-PKcs_N	Domain	TPR	DNA-PKcs, N-terminal
PRKDC	DNA-dependent protein kinase catalytic subunit	P78527	MQLVCCR	DNA-PKcs_N	Domain	TPR	DNA-PKcs, N-terminal
PRKDC	DNA-dependent protein kinase catalytic subunit	P78527	AYVPALQMAFK	DNA-PKcs_N	Domain	TPR	DNA-PKcs, N-terminal
PRKDC	DNA-dependent protein kinase catalytic subunit	P78527	VFLALAAK	DNA-PKcs_N	Domain	TPR	DNA-PKcs, N-terminal
PRKDC	DNA-dependent protein kinase catalytic subunit	P78527	NLSSNEAISLEEIR	DNA-PKcs_N	Domain	TPR	DNA-PKcs, N-terminal
PRKDC	DNA-dependent protein kinase catalytic subunit	P78527	FYGELALK	DNA-PKcs_N	Domain	TPR	DNA-PKcs, N-terminal
PRKDC	DNA-dependent protein kinase catalytic subunit	P78527	NVDSNNKELSIAIR	DNA-PKcs_N	Domain	TPR	DNA-PKcs, N-terminal
PRKDC	DNA-dependent protein kinase catalytic subunit	P78527	YAVPSAGLR	DNA-PKcs_N	Domain	TPR	DNA-PKcs, N-terminal
PRKDC	DNA-dependent protein kinase catalytic subunit	P78527	ECREEILK	DNA-PKcs_N	Domain	TPR	DNA-PKcs, N-terminal
PRKDC	DNA-dependent protein kinase catalytic subunit	P78527	GYGLFAGPCK	DNA-PKcs_N	Domain	TPR	DNA-PKcs, N-terminal
PRKDC	DNA-dependent protein kinase catalytic subunit	P78527	KAALSALESFLK	DNA-PKcs_N	Domain	TPR	DNA-PKcs, N-terminal
PRKDC	DNA-dependent protein kinase catalytic subunit	P78527	NCISTVVHQGLIR	DNA-PKcs_N	Domain	TPR	DNA-PKcs, N-terminal
PRKDC	DNA-dependent protein kinase catalytic subunit	P78527	AALSALESFLK	DNA-PKcs_N	Domain	TPR	DNA-PKcs, N-terminal
PRKDC	DNA-dependent protein kinase catalytic subunit	P78527	YFEGVSPK	DNA-PKcs_N	Domain	TPR	DNA-PKcs, N-terminal
PRKDC	DNA-dependent protein kinase catalytic subunit	P78527	IAPYSVEIK	DNA-PKcs_N	Domain	TPR	DNA-PKcs, N-terminal
PRKDC	DNA-dependent protein kinase catalytic subunit	P78527	GLSSLLCNFTK	DNA-PKcs_N	Domain	TPR	DNA-PKcs, N-terminal
PRKDC	DNA-dependent protein kinase catalytic subunit	P78527	VFLALAAKGPVLR	DNA-PKcs_N	Domain	TPR	DNA-PKcs, N-terminal
PRKDC	DNA-dependent protein kinase catalytic subunit	P78527	AIRPQIDLKR	DNA-PKcs_N	Domain	TPR	DNA-PKcs, N-terminal
PRKDC	DNA-dependent protein kinase catalytic subunit	P78527	HSPEDPEKYSCFALFVK	DNA-PKcs_N	Domain	TPR	DNA-PKcs, N-terminal
PRKDC	DNA-dependent protein kinase catalytic subunit	P78527	LLSITVR	DNA-PKcs_N	Domain	TPR	DNA-PKcs, N-terminal
ZMYM3	Zinc finger MYM-type protein 3	Q14202	FYEFYLSK	DUF3504	Family	DNA-mend	Domain of unknown function (DUF3504)
EHD4	EH domain-containing protein 4	Q9H223	SISVIDSPGILSGEKQR	Dynamin_N	Domain	P-loop_NTPase	Dynamin family
DYNC1H1	Cytoplasmic dynein 1 heavy chain 1	Q14204	LFLTMEINPK	Dynein_heavy	Domain	P-loop_NTPase	Dynein heavy chain region D6 P-loop domain
UTRN	Utrophin	P46939	QLGLLLHDAIQIPR	EF-hand_3	Domain	EF_hand	EF-hand
PDCD6	Programmed cell death protein 6	O75340	QALSGFGYR	EF-hand_7	Domain	EF_hand	EF-hand domain pair
PDCD6	Programmed cell death protein 6	O75340	LSDQFHDILIR	EF-hand_7	Domain	EF_hand	EF-hand domain pair
PDCD6	Programmed cell death protein 6	O75340	TYDRDNSGMIDKNELK	EF-hand_7	Domain	EF_hand	EF-hand domain pair
ETFA	Electron transfer flavoprotein subunit alpha	P13804	AAVDAGFVPNDMQVGQTGK	ETF_alpha	Domain	FAD_DHS	Electron transfer flavoprotein FAD-binding domain
GFM2	Ribosome-releasing factor 2	Q969S9	DYLSPVLADLAQRR	EFG_C	Domain	EF-G_C	Elongation factor G C-terminus
EIF2S3	Eukaryotic translation initiation factor 2 subunit 3	P41091	YNIEVVCEYIVK	GTP_EFTU	Domain	P-loop_NTPase	Elongation factor Tu GTP binding domain
GSPT1	Eukaryotic peptide chain release factor GTP-binding subunit ERF3A	P15170	SVVAPPGAPKKEHVNVVFIGHVDAGK	GTP_EFTU	Domain	P-loop_NTPase	Elongation factor Tu GTP binding domain
EEF1A1	Elongation factor 1-alpha 1	P68104	EKTHINIVVIGHVDSGK	GTP_EFTU	Domain	P-loop_NTPase	Elongation factor Tu GTP binding domain
EFTUD2	116 kDa U5 small nuclear ribonucleoprotein component	Q15029	ILAQVVGDVDTSLPR	GTP_EFTU	Domain	P-loop_NTPase	Elongation factor Tu GTP binding domain
EEF1A2	Elongation factor 1-alpha 2	Q05639	EVSAYIK	GTP_EFTU	Domain	P-loop_NTPase	Elongation factor Tu GTP binding domain
EIF5B	Eukaryotic translation initiation factor 5B	O60841	CPFIVALNK	GTP_EFTU	Domain	P-loop_NTPase	Elongation factor Tu GTP binding domain
DECR1	2	Q16698	LDPTGTFEKEMIGR	adh_short_C2	Domain	NADP_Rossmann	Enoyl-(Acyl carrier protein) reductase
ECHS1	Enoyl-CoA hydratase	P30084	LFYSTFATDDRK	ECH_1	Domain	ClpP_crotonase	Enoyl-CoA hydratase/isomerase
ECHS1	Enoyl-CoA hydratase	P30084	LFYSTFATDDR	ECH_1	Domain	ClpP_crotonase	Enoyl-CoA hydratase/isomerase
HADHA	Trifunctional enzyme subunit alpha	P40939	TLQEVTQLSQEAQR	ECH_1	Domain	ClpP_crotonase	Enoyl-CoA hydratase/isomerase
HADHA	Trifunctional enzyme subunit alpha	P40939	TVLGTPEVLLGALPGAGGTQRLPK	ECH_1	Domain	ClpP_crotonase	Enoyl-CoA hydratase/isomerase
ECHS1	Enoyl-CoA hydratase	P30084	KLFYSTFATDDRK	ECH_1	Domain	ClpP_crotonase	Enoyl-CoA hydratase/isomerase
ECHS1	Enoyl-CoA hydratase	P30084	EGMTAFVEKR	ECH_1	Domain	ClpP_crotonase	Enoyl-CoA hydratase/isomerase
HADHA	Trifunctional enzyme subunit alpha	P40939	TVLGTPEVLLGALPGAGGTQR	ECH_1	Domain	ClpP_crotonase	Enoyl-CoA hydratase/isomerase
ECHS1	Enoyl-CoA hydratase	P30084	KLFYSTFATDDR	ECH_1	Domain	ClpP_crotonase	Enoyl-CoA hydratase/isomerase
ECHS1	Enoyl-CoA hydratase	P30084	NNTVGLIQLNRPK	ECH_1	Domain	ClpP_crotonase	Enoyl-CoA hydratase/isomerase
ECHS1	Enoyl-CoA hydratase	P30084	GKNNTVGLIQLNRPK	ECH_1	Domain	ClpP_crotonase	Enoyl-CoA hydratase/isomerase
HADHA	Trifunctional enzyme subunit alpha	P40939	IVEKLEK	ECH_1	Domain	ClpP_crotonase	Enoyl-CoA hydratase/isomerase
HADHA	Trifunctional enzyme subunit alpha	P40939	KTVLGTPEVLLGALPGAGGTQRLPK	ECH_1	Domain	ClpP_crotonase	Enoyl-CoA hydratase/isomerase
ECHS1	Enoyl-CoA hydratase	P30084	ICPVETLVEEAIQCAEK	ECH_1	Domain	ClpP_crotonase	Enoyl-CoA hydratase/isomerase
ECHS1	Enoyl-CoA hydratase	P30084	EGMTAFVEK	ECH_1	Domain	ClpP_crotonase	Enoyl-CoA hydratase/isomerase
ECHS1	Enoyl-CoA hydratase	P30084	ALNALCDGLIDELNQALK	ECH_1	Domain	ClpP_crotonase	Enoyl-CoA hydratase/isomerase
HADHA	Trifunctional enzyme subunit alpha	P40939	ELHSEFSEVMNEIWASDQIR	ECH_1	Domain	ClpP_crotonase	Enoyl-CoA hydratase/isomerase
ECHS1	Enoyl-CoA hydratase	P30084	LFYSTFATDDRKEGMTAFVEK	ECH_1	Domain	ClpP_crotonase	Enoyl-CoA hydratase/isomerase
ECHS1	Enoyl-CoA hydratase	P30084	AFAAGADIK	ECH_1	Domain	ClpP_crotonase	Enoyl-CoA hydratase/isomerase
CLINT1	Clathrin interactor 1	Q14677	SLENYHFVDEHGKDQGINIR	ENTH	Domain	ENTH_VHS	ENTH domain
ETF1	Eukaryotic peptide chain release factor subunit 1	P62495	FTVDLPK	eRF1_2	Domain	S11_L18p	eRF1 domain 2
EIF3D	Eukaryotic translation initiation factor 3 subunit D	O15371	AKFMTPVIQDNPSGWGPCAVPEQFR	eIF-3_zeta	Family	PDDEXK	Eukaryotic translation initiation factor 3 subunit 7 (eIF-3)
THYN1	Thymocyte nuclear protein 1	Q9P016	FIPLAELK	EVE	Domain	PUA	EVE domain
EXOC7	Exocyst complex component 7	Q9UPT5	EHIEQQIQTYQR	Exo70	Family	Vps51	Exo70 exocyst complex subunit
PRKDC	DNA-dependent protein kinase catalytic subunit	P78527	QGNLSSQVPLKR	FAT	Repeat	TPR	FAT domain
PRKDC	DNA-dependent protein kinase catalytic subunit	P78527	CFFLSKIEEK	FAT	Repeat	TPR	FAT domain
ATR	Serine/threonine-protein kinase ATR	Q13535	GDVHQALIVLQK	FAT	Repeat	TPR	FAT domain
PRKDC	DNA-dependent protein kinase catalytic subunit	P78527	SQGCSEQVLTVLK	FAT	Repeat	TPR	FAT domain
PRKDC	DNA-dependent protein kinase catalytic subunit	P78527	VIAGLYQR	FAT	Repeat	TPR	FAT domain
PRKDC	DNA-dependent protein kinase catalytic subunit	P78527	DQNILLGTTYR	FAT	Repeat	TPR	FAT domain
PRKDC	DNA-dependent protein kinase catalytic subunit	P78527	NILAFRDQNILLGTTYR	FAT	Repeat	TPR	FAT domain
EZR	Ezrin	P15311	GMLKDNAMLEYLK	FERM_M	Domain	FERM_M	FERM central domain
EZR	Ezrin	P15311	DNAMLEYLK	FERM_M	Domain	FERM_M	FERM central domain
FECH	Ferrochelatase	P22830	ECGVENIR	Ferrochelatase	Domain	Chelatase	Ferrochelatase
FLNB	Filamin-B	O75369	LTVMSLQESGLK	Filamin	Domain	E-set	Filamin/ABP280 repeat
FLNA	Filamin-A	P21333	YAPSEAGLHEMDIR	Filamin	Domain	E-set	Filamin/ABP280 repeat
PPOX	Protoporphyrinogen oxidase	P50336	VVLVESSER	Amino_oxidase	Domain	NADP_Rossmann	Flavin containing amine oxidoreductase
KDM1A	Lysine-specific histone demethylase 1A	O60341	IADQFLGAMYTLPR	Amino_oxidase	Domain	NADP_Rossmann	Flavin containing amine oxidoreductase
KDM1A	Lysine-specific histone demethylase 1A	O60341	IKELHQQYK	Amino_oxidase	Domain	NADP_Rossmann	Flavin containing amine oxidoreductase
KDM1A	Lysine-specific histone demethylase 1A	O60341	CPLYEANGQAVPK	Amino_oxidase	Domain	NADP_Rossmann	Flavin containing amine oxidoreductase
NQO1	NAD(P)H dehydrogenase [quinone] 1	P15559	ALIVLAHSER	Flavodoxin_2	Domain	Flavoprotein	Flavodoxin-like fold
GATB	Glutamyl-tRNA(Gln) amidotransferase subunit B	O75879	EGKTPGQIVSEK	GatB_Yqey	Domain	GatB_YqeY	GatB domain
GATB	Glutamyl-tRNA(Gln) amidotransferase subunit B	O75879	LPIAVNGSLIYGVCAGKK	GatB_N	Domain	GCS	GatB/GatE catalytic domain
GATB	Glutamyl-tRNA(Gln) amidotransferase subunit B	O75879	LFSGSQVR	GatB_N	Domain	GCS	GatB/GatE catalytic domain
GATB	Glutamyl-tRNA(Gln) amidotransferase subunit B	O75879	HYFYADLPAGYQITQQR	GatB_N	Domain	GCS	GatB/GatE catalytic domain
GATB	Glutamyl-tRNA(Gln) amidotransferase subunit B	O75879	SQTLIDLNR	GatB_N	Domain	GCS	GatB/GatE catalytic domain
GATB	Glutamyl-tRNA(Gln) amidotransferase subunit B	O75879	VDANISVHHPGEPLGVR	GatB_N	Domain	GCS	GatB/GatE catalytic domain
MVK	Mevalonate kinase	Q03426	MIHGNPSGVDNAVSTWGGALR	GHMP_kinases_N	Family	S5	GHMP kinases N terminal domain
G6PD	Glucose-6-phosphate 1-dehydrogenase	P11413	LILDVFCGSQMHFVR	G6PD_C	Domain	GADPH_aa-bio_dh	Glucose-6-phosphate dehydrogenase, C-terminal domain
G6PD	Glucose-6-phosphate 1-dehydrogenase	P11413	NVKLPDAYER	G6PD_C	Domain	GADPH_aa-bio_dh	Glucose-6-phosphate dehydrogenase, C-terminal domain
G6PD	Glucose-6-phosphate 1-dehydrogenase	P11413	VGFQYEGTYK	G6PD_C	Domain	GADPH_aa-bio_dh	Glucose-6-phosphate dehydrogenase, C-terminal domain
G6PD	Glucose-6-phosphate 1-dehydrogenase	P11413	VQPNEAVYTK	G6PD_C	Domain	GADPH_aa-bio_dh	Glucose-6-phosphate dehydrogenase, C-terminal domain
G6PD	Glucose-6-phosphate 1-dehydrogenase	P11413	IFTPLLHQIELEKPKPIPYIYGSR	G6PD_C	Domain	GADPH_aa-bio_dh	Glucose-6-phosphate dehydrogenase, C-terminal domain
G6PD	Glucose-6-phosphate 1-dehydrogenase	P11413	GPTEADELMKR	G6PD_C	Domain	GADPH_aa-bio_dh	Glucose-6-phosphate dehydrogenase, C-terminal domain
G6PD	Glucose-6-phosphate 1-dehydrogenase	P11413	LQFHDVAGDIFHQQCK	G6PD_C	Domain	GADPH_aa-bio_dh	Glucose-6-phosphate dehydrogenase, C-terminal domain
G6PD	Glucose-6-phosphate 1-dehydrogenase	P11413	KPGMFFNPEESELDLTYGNR	G6PD_C	Domain	GADPH_aa-bio_dh	Glucose-6-phosphate dehydrogenase, C-terminal domain
G6PD	Glucose-6-phosphate 1-dehydrogenase	P11413	LSNHISSLFREDQIYR	G6PD_N	Domain	NADP_Rossmann	Glucose-6-phosphate dehydrogenase, NAD binding domain
GLS	Glutaminase kidney isoform	O94925	VPFCLQSCVKPLK	Glutaminase	Domain	Beta-lactamase	Glutaminase
CTPS2	CTP synthase 2	Q9NRF8	KLYGDVPFIEER	GATase	Domain	Glutaminase_I	Glutamine amidotransferase class-I
GFPT1	Glutamine--fructose-6-phosphate aminotransferase [isomerizing] 1	Q06210	SDKNNEFIVIHNGIITNYK	GATase_6	Domain	NTN	Glutamine amidotransferase domain
GPX4	Phospholipid hydroperoxide glutathione peroxidase GPX4	P36969	ILAFPCNQFGK	GSHPx	Family	Thioredoxin	Glutathione peroxidase
GPX4	Phospholipid hydroperoxide glutathione peroxidase GPX4	P36969	DIDGHMVNLDKYR	GSHPx	Family	Thioredoxin	Glutathione peroxidase
GSTM3	Glutathione S-transferase Mu 3	P21266	FSWFAGEK	GST_C	Domain	GST_C	Glutathione S-transferase, C-terminal domain
GSTM3	Glutathione S-transferase Mu 3	P21266	IRVDIIENQVMDFR	GST_C	Domain	GST_C	Glutathione S-transferase, C-terminal domain
GSTM3	Glutathione S-transferase Mu 3	P21266	QFSMFLGK	GST_C	Domain	GST_C	Glutathione S-transferase, C-terminal domain
GSTM3	Glutathione S-transferase Mu 3	P21266	NKITQSNAILR	GST_N	Domain	Thioredoxin	Glutathione S-transferase, N-terminal domain
GANAB	Neutral alpha-glucosidase AB	Q14697	KLVAIVDPHIK	Glyco_hydro_31	Family	Glyco_hydro_tim	Glycosyl hydrolases family 31
ATL3	Atlastin-3	Q6DD88	IYQGEDLPHPK	GBP_C	Domain	P-loop_NTPase	Guanylate-binding protein, C-terminal domain
ATL3	Atlastin-3	Q6DD88	GLLEYFK	GBP_C	Domain	P-loop_NTPase	Guanylate-binding protein, C-terminal domain
ATL3	Atlastin-3	Q6DD88	ALASILLQDHIR	GBP	Domain	P-loop_NTPase	Guanylate-binding protein, N-terminal domain
HDHD3	Haloacid dehalogenase-like hydrolase domain-containing protein 3	Q9BSH5	IFQEALR	HAD_2	Family	HAD	Haloacid dehalogenase-like hydrolase
HDHD3	Haloacid dehalogenase-like hydrolase domain-containing protein 3	Q9BSH5	LEGILGGLGLR	HAD_2	Family	HAD	Haloacid dehalogenase-like hydrolase
PPP2R1A	Serine/threonine-protein phosphatase 2A 65 kDa regulatory subunit A alpha isoform	P30153	VKEFCENLSADCR	HEAT	Repeat	TPR	HEAT repeat
PPP2R1A	Serine/threonine-protein phosphatase 2A 65 kDa regulatory subunit A alpha isoform	P30153	EFCENLSADCR	HEAT	Repeat	TPR	HEAT repeat
DOHH	Deoxyhypusine hydroxylase	Q9BU89	HEAGEALGAIGDPEVLEILK	HEAT_2	Repeat	TPR	HEAT repeats
DOHH	Deoxyhypusine hydroxylase	Q9BU89	NAGGEEAALALAEGLHCGSALFR	HEAT_2	Repeat	TPR	HEAT repeats
DOHH	Deoxyhypusine hydroxylase	Q9BU89	AIPMLVDVLQDTR	HEAT_2	Repeat	TPR	HEAT repeats
DOHH	Deoxyhypusine hydroxylase	Q9BU89	AIPMLVDVLQDTRQEPMVR	HEAT_2	Repeat	TPR	HEAT repeats
DNAAF5	Dynein axonemal assembly factor 5	Q86Y56	SVDDVLSHFAQR	HEAT_2	Repeat	TPR	HEAT repeats
PPP2R1A	Serine/threonine-protein phosphatase 2A 65 kDa regulatory subunit A alpha isoform	P30153	NLCSDDTPMVR	HEAT_2	Repeat	TPR	HEAT repeats
PPP2R1A	Serine/threonine-protein phosphatase 2A 65 kDa regulatory subunit A alpha isoform	P30153	VLELDNVK	HEAT_2	Repeat	TPR	HEAT repeats
IPO4	Importin-4	Q8TEX9	LLPVLLSTAQEADPEVR	HEAT_EZ	Repeat	TPR	HEAT-like repeat
DHX15	ATP-dependent RNA helicase DHX15	O43143	IIPLYSTLPPQQQQR	Helicase_C	Domain	P-loop_NTPase	Helicase conserved C-terminal domain
DDX1	ATP-dependent RNA helicase DDX1	Q92499	GIDIHGVPYVINVTLPDEKQNYVHR	Helicase_C	Domain	P-loop_NTPase	Helicase conserved C-terminal domain
DDX59	Probable ATP-dependent RNA helicase DDX59	Q5T1V6	GLDLISVR	Helicase_C	Domain	P-loop_NTPase	Helicase conserved C-terminal domain
HK2	Hexokinase-2	P52789	SASLCAATLAAVLQR	Hexokinase_2	Domain	Actin_ATPase	Hexokinase
HK1	Hexokinase-1	P19367	ATDCVGHDVVTLLR	Hexokinase_1	Domain	Actin_ATPase	Hexokinase
HK2	Hexokinase-2	P52789	NVELVEGEEGR	Hexokinase_2	Domain	Actin_ATPase	Hexokinase
HK2	Hexokinase-2	P52789	STIGVDGSVYK	Hexokinase_2	Domain	Actin_ATPase	Hexokinase
HK2	Hexokinase-2	P52789	MLPTYVCATPDGTEKGDFLALDLGGTNFR	Hexokinase_1	Domain	Actin_ATPase	Hexokinase
HK2	Hexokinase-2	P52789	LSDETLLEISKR	Hexokinase_1	Domain	Actin_ATPase	Hexokinase
HSP90AB1	Heat shock protein HSP 90-beta	P08238	YESLTDPSK	HATPase_c	Domain	His_Kinase_A	Histidine kinase-, DNA gyrase B-, and HSP90-like ATPase
HSP90AA1	Heat shock protein HSP 90-alpha	P07900	ELISNSSDALDK	HATPase_c	Domain	His_Kinase_A	Histidine kinase-, DNA gyrase B-, and HSP90-like ATPase
HSP90AA1	Heat shock protein HSP 90-alpha	P07900	ELISNSSDALDKIR	HATPase_c	Domain	His_Kinase_A	Histidine kinase-, DNA gyrase B-, and HSP90-like ATPase
HSP90AB1	Heat shock protein HSP 90-beta	P08238	EDQTEYLEERR	HATPase_c	Domain	His_Kinase_A	Histidine kinase-, DNA gyrase B-, and HSP90-like ATPase
HINT2	Adenosine 5'-monophosphoramidase HINT2	Q9BX68	LVINDGK	HIT	Domain	HIT	HIT domain
HMGB1	High mobility group protein B1	P09429	HPDASVNFSEFSKKCSER	HMG_box_2	Domain	HMG-box	HMG-box domain
HMGB1	High mobility group protein B1	P09429	MSSYAFFVQTCR	HMG_box_2	Domain	HMG-box	HMG-box domain
CLYBL	Citramalyl-CoA lyase	Q8N0X4	VESPEEIQWFADK	HpcH_HpaI	Family	PK_TIM	HpcH/HpaI aldolase/citrate lyase family
HSPB1	Heat shock protein beta-1	P04792	WRVSLDVNHFAPDELTVK	HSP20	Domain	HSP20	Hsp20/alpha crystallin family
HSPA4L	Heat shock 70 kDa protein 4L	O95757	CTPACISLGSR	HSP70	Family	Actin_ATPase	Hsp70 protein
HSPA4L	Heat shock 70 kDa protein 4L	O95757	NHPAPFSK	HSP70	Family	Actin_ATPase	Hsp70 protein
HSPH1	Heat shock protein 105 kDa	Q92598	AFNDPFIQK	HSP70	Family	Actin_ATPase	Hsp70 protein
HSPA9	Stress-70 protein	P38646	DAGQISGLNVLR	HSP70	Family	Actin_ATPase	Hsp70 protein
IPO4	Importin-4	Q8TEX9	APAALPALCDLLASAADPQIR	IBN_N	Repeat	TPR	Importin-beta N-terminal domain
IFT81	Intraflagellar transport protein 81 homolog	Q8WYA0	MLSLLGILK	IFT81_CH	Domain	CH	Intraflagellar transport 81 calponin homology domain
BRCC3	Lys-63-specific deubiquitinase BRCC36	P46736	DRVEISPEQLSAASTEAER	JAB	Family	JAB	JAB1/Mov34/MPN/PAD-1 ubiquitin protease
KIF2C	Kinesin-like protein KIF2C	Q99661	KEIDVISIPSK	Kinesin	Domain	P-loop_NTPase	Kinesin motor domain
KIF5B	Kinesin-1 heavy chain	P33176	HVAVTNMNEHSSR	Kinesin	Domain	P-loop_NTPase	Kinesin motor domain
KIF5B	Kinesin-1 heavy chain	P33176	ILQDSLGGNCR	Kinesin	Domain	P-loop_NTPase	Kinesin motor domain
KIF5B	Kinesin-1 heavy chain	P33176	FVCSPDEVMDTIDEGKSNR	Kinesin	Domain	P-loop_NTPase	Kinesin motor domain
KIF5B	Kinesin-1 heavy chain	P33176	VFQSSTSQEQVYNDCAK	Kinesin	Domain	P-loop_NTPase	Kinesin motor domain
KIF5B	Kinesin-1 heavy chain	P33176	LHDPEGMGIIPR	Kinesin	Domain	P-loop_NTPase	Kinesin motor domain
KIF5B	Kinesin-1 heavy chain	P33176	LYLVDLAGSEK	Kinesin	Domain	P-loop_NTPase	Kinesin motor domain
KIF5B	Kinesin-1 heavy chain	P33176	FQGEDTVVIASKPYAFDR	Kinesin	Domain	P-loop_NTPase	Kinesin motor domain
KIF5B	Kinesin-1 heavy chain	P33176	SLSALGNVISALAEGSTYVPYRDSK	Kinesin	Domain	P-loop_NTPase	Kinesin motor domain
KIF5B	Kinesin-1 heavy chain	P33176	SHSIFLINVK	Kinesin	Domain	P-loop_NTPase	Kinesin motor domain
XRCC5	X-ray repair cross-complementing protein 5	P13010	YKSEGKCFSVLGFCK	Ku	Domain	SPOC	Ku70/Ku80 beta-barrel domain
NLRP2	NACHT	Q9NX02	MLFETLTCSSGTLR	LRR_6	Repeat	LRR	Leucine Rich repeat
NLRP2	NACHT	Q9NX02	SSLLCLDLGLNHIGVK	LRR_6	Repeat	LRR	Leucine Rich repeat
LRRC14	Leucine-rich repeat-containing protein 14	Q15048	FNNLGLR	LRR_6	Repeat	LRR	Leucine Rich repeat
NLRP2	NACHT	Q9NX02	LLYTTLR	LRR_6	Repeat	LRR	Leucine Rich repeat
LASP1	LIM and SH3 domain protein 1	Q14847	MNPNCARCGK	LIM	Domain	Zn_Beta_Ribbon	LIM domain
RBP1	Retinol-binding protein 1	P09455	PVDFTGYWK	Lipocalin	Domain	Calycin	Lipocalin / cytosolic fatty-acid binding protein family
RBP1	Retinol-binding protein 1	P09455	MLVNENFEEYLR	Lipocalin	Domain	Calycin	Lipocalin / cytosolic fatty-acid binding protein family
RBP1	Retinol-binding protein 1	P09455	GWTQWIEGDELHLEMR	Lipocalin	Domain	Calycin	Lipocalin / cytosolic fatty-acid binding protein family
LONP1	Lon protease homolog	P36776	RAGVTCIVLPAENKK	Lon_C	Domain	S5	Lon protease (S16) C-terminal proteolytic domain
MCM6	DNA replication licensing factor MCM6	Q14566	ESEDFIVEQYK	MCM_lid	Domain	AAA_lid	MCM AAA-lid domain
MCM4	DNA replication licensing factor MCM4	P33991	LSNKVEAIDVEEAK	MCM_lid	Domain	AAA_lid	MCM AAA-lid domain
MCM6	DNA replication licensing factor MCM6	Q14566	ISKESEDFIVEQYK	MCM_lid	Domain	AAA_lid	MCM AAA-lid domain
MCM6	DNA replication licensing factor MCM6	Q14566	IEESIDRVYSLDDIRR	MCM_lid	Domain	AAA_lid	MCM AAA-lid domain
MCM4	DNA replication licensing factor MCM4	P33991	LSEEASQALIEAYVDMR	MCM_lid	Domain	AAA_lid	MCM AAA-lid domain
MCM6	DNA replication licensing factor MCM6	Q14566	VYSLDDIR	MCM_lid	Domain	AAA_lid	MCM AAA-lid domain
MCM6	DNA replication licensing factor MCM6	Q14566	MHCCDEVQPK	MCM_lid	Domain	AAA_lid	MCM AAA-lid domain
MCM4	DNA replication licensing factor MCM4	P33991	LSNKVEAIDVEEAKR	MCM_lid	Domain	AAA_lid	MCM AAA-lid domain
MCM6	DNA replication licensing factor MCM6	Q14566	VYSLDDIRR	MCM_lid	Domain	AAA_lid	MCM AAA-lid domain
MCM4	DNA replication licensing factor MCM4	P33991	EALKQSATDPR	MCM_lid	Domain	AAA_lid	MCM AAA-lid domain
MCM4	DNA replication licensing factor MCM4	P33991	GMVSAYPR	MCM_lid	Domain	AAA_lid	MCM AAA-lid domain
MCM6	DNA replication licensing factor MCM6	Q14566	RYLLFAR	MCM_lid	Domain	AAA_lid	MCM AAA-lid domain
MCM6	DNA replication licensing factor MCM6	Q14566	LSEAMAR	MCM_lid	Domain	AAA_lid	MCM AAA-lid domain
MCM6	DNA replication licensing factor MCM6	Q14566	ESEDFIVEQYKHLR	MCM_lid	Domain	AAA_lid	MCM AAA-lid domain
MCM6	DNA replication licensing factor MCM6	Q14566	IQETQAELPR	MCM_OB	Domain	OB	MCM OB domain
MCM6	DNA replication licensing factor MCM6	Q14566	FLLDTNK	MCM_OB	Domain	OB	MCM OB domain
MCM6	DNA replication licensing factor MCM6	Q14566	YTQPNICRNPVCANR	MCM_OB	Domain	OB	MCM OB domain
MCM6	DNA replication licensing factor MCM6	Q14566	YTQPNICR	MCM_OB	Domain	OB	MCM OB domain
MCM6	DNA replication licensing factor MCM6	Q14566	SLEVILR	MCM_OB	Domain	OB	MCM OB domain
MCM4	DNA replication licensing factor MCM4	P33991	IAEPSVCGR	MCM_OB	Domain	OB	MCM OB domain
MCM6	DNA replication licensing factor MCM6	Q14566	DVEQQFK	MCM_OB	Domain	OB	MCM OB domain
MCM6	DNA replication licensing factor MCM6	Q14566	VRIQETQAELPR	MCM_OB	Domain	OB	MCM OB domain
MCM6	DNA replication licensing factor MCM6	Q14566	RFLLDTNK	MCM_OB	Domain	OB	MCM OB domain
MCM5	DNA replication licensing factor MCM5	P33992	VTIMGIYSIK	MCM_OB	Domain	OB	MCM OB domain
MCM5	DNA replication licensing factor MCM5	P33992	CVDFQTLK	MCM_OB	Domain	OB	MCM OB domain
MCM6	DNA replication licensing factor MCM6	Q14566	GDINVCIVGDPSTAK	MCM	Domain	P-loop_NTPase	MCM P-loop domain
MCM6	DNA replication licensing factor MCM6	Q14566	TSILAAANPISGHYDR	MCM	Domain	P-loop_NTPase	MCM P-loop domain
MCM4	DNA replication licensing factor MCM4	P33991	TTIENIQLPHTLLSR	MCM	Domain	P-loop_NTPase	MCM P-loop domain
MCM4	DNA replication licensing factor MCM4	P33991	LASALAPSIYEHEDIKK	MCM	Domain	P-loop_NTPase	MCM P-loop domain
MCM2	DNA replication licensing factor MCM2	P49736	FVVGSHVR	MCM	Domain	P-loop_NTPase	MCM P-loop domain
MCM4	DNA replication licensing factor MCM4	P33991	KTTIENIQLPHTLLSR	MCM	Domain	P-loop_NTPase	MCM P-loop domain
MCM4	DNA replication licensing factor MCM4	P33991	AEINILLCGDPGTSK	MCM	Domain	P-loop_NTPase	MCM P-loop domain
MCM4	DNA replication licensing factor MCM4	P33991	SQLLQYVYNLVPR	MCM	Domain	P-loop_NTPase	MCM P-loop domain
MCM4	DNA replication licensing factor MCM4	P33991	AGIICQLNAR	MCM	Domain	P-loop_NTPase	MCM P-loop domain
MCM6	DNA replication licensing factor MCM6	Q14566	ASSAAGLTAAVVR	MCM	Domain	P-loop_NTPase	MCM P-loop domain
MCM6	DNA replication licensing factor MCM6	Q14566	HVEEFSPR	MCM	Domain	P-loop_NTPase	MCM P-loop domain
MCM6	DNA replication licensing factor MCM6	Q14566	DQVAIHEAMEQQTISITK	MCM	Domain	P-loop_NTPase	MCM P-loop domain
MCM6	DNA replication licensing factor MCM6	Q14566	TTGEGTSLRGDINVCIVGDPSTAK	MCM	Domain	P-loop_NTPase	MCM P-loop domain
MCM4	DNA replication licensing factor MCM4	P33991	GSSAVGLTAYVMKDPETR	MCM	Domain	P-loop_NTPase	MCM P-loop domain
MCM4	DNA replication licensing factor MCM4	P33991	LASALAPSIYEHEDIK	MCM	Domain	P-loop_NTPase	MCM P-loop domain
MCM4	DNA replication licensing factor MCM4	P33991	GILLQLFGGTRK	MCM	Domain	P-loop_NTPase	MCM P-loop domain
MCM6	DNA replication licensing factor MCM6	Q14566	VFEMSQDK	MCM	Domain	P-loop_NTPase	MCM P-loop domain
MCM4	DNA replication licensing factor MCM4	P33991	GILLQLFGGTR	MCM	Domain	P-loop_NTPase	MCM P-loop domain
MCM4	DNA replication licensing factor MCM4	P33991	ELSRKPDIYER	MCM	Domain	P-loop_NTPase	MCM P-loop domain
MCM6	DNA replication licensing factor MCM6	Q14566	NLYHNLCTSLFPTIHGNDEVKR	MCM	Domain	P-loop_NTPase	MCM P-loop domain
MCM4	DNA replication licensing factor MCM4	P33991	KPDIYER	MCM	Domain	P-loop_NTPase	MCM P-loop domain
MCM6	DNA replication licensing factor MCM6	Q14566	IVDLHSR	MCM	Domain	P-loop_NTPase	MCM P-loop domain
MCM4	DNA replication licensing factor MCM4	P33991	QLVLQTGALVLSDNGICCIDEFDKMNESTR	MCM	Domain	P-loop_NTPase	MCM P-loop domain
MVD	Diphosphomevalonate decarboxylase	P53602	KLTGSTVGMR	MDD_C	Domain	GHMP_C	Mevalonate 5-diphosphate decarboxylase C-terminal domain
MVD	Diphosphomevalonate decarboxylase	P53602	ASVETSPLLR	MDD_C	Domain	GHMP_C	Mevalonate 5-diphosphate decarboxylase C-terminal domain
SMAD2	Mothers against decapentaplegic homolog 2	Q15796	DEVCVNPYHYQR	MH1	Domain	His-Me_finger	MH1 domain
SMAD2	Mothers against decapentaplegic homolog 2	Q15796	AIENCEYAFNLKK	MH1	Domain	His-Me_finger	MH1 domain
SMAD2	Mothers against decapentaplegic homolog 2	Q15796	YGWHPATVCK	MH2	Family	SMAD-FHA	MH2 domain
EIF4G3	Eukaryotic translation initiation factor 4 gamma 3	O43432	LKGVIDLVFEK	MIF4G	Repeat	TPR	MIF4G domain
SNAPC4	snRNA-activating protein complex subunit 4	Q5SXM2	WNLKEEEQLIELIEK	Myb_DNA-binding	Domain	HTH	Myb-like DNA-binding domain
MYH9	Myosin-9	P35579	NTDQASMPDNTAAQKVSHLLGINVTDFTRGILTPR	Myosin_head	Domain	P-loop_NTPase	Myosin head (motor domain)
MYO6	Unconventional myosin-VI	Q9UM54	LSFISVGNKFK	Myosin_head	Domain	P-loop_NTPase	Myosin head (motor domain)
MYO1C	Unconventional myosin-Ic	O00159	IICDLVEEK	Myosin_head	Domain	P-loop_NTPase	Myosin head (motor domain)
MYO1C	Unconventional myosin-Ic	O00159	IICDLVEEKFK	Myosin_head	Domain	P-loop_NTPase	Myosin head (motor domain)
MYH9	Myosin-9	P35579	TDLLLEPYNKYR	Myosin_head	Domain	P-loop_NTPase	Myosin head (motor domain)
MYH9	Myosin-9	P35579	VISGVLQLGNIVFKK	Myosin_head	Domain	P-loop_NTPase	Myosin head (motor domain)
MYH9	Myosin-9	P35579	ALELDSNLYR	Myosin_head	Domain	P-loop_NTPase	Myosin head (motor domain)
NAT1	Arylamine N-acetyltransferase 1	P18440	NKLDLETLTDILQHQIR	Acetyltransf_2	Family	Peptidase_CA	N-acetyltransferase
SDR39U1	Epimerase family protein SDR39U1	Q9NRG7	LETTQLLAK	Epimerase	Family	NADP_Rossmann	NAD dependent epimerase/dehydratase family
SDR39U1	Epimerase family protein SDR39U1	Q9NRG7	GHEVTLVSR	Epimerase	Family	NADP_Rossmann	NAD dependent epimerase/dehydratase family
SDR39U1	Epimerase family protein SDR39U1	Q9NRG7	WNETFQK	Epimerase	Family	NADP_Rossmann	NAD dependent epimerase/dehydratase family
SDR39U1	Epimerase family protein SDR39U1	Q9NRG7	ITWDELAASGLPSCDAAVNLAGENILNPLRR	Epimerase	Family	NADP_Rossmann	NAD dependent epimerase/dehydratase family
GPD1L	Glycerol-3-phosphate dehydrogenase 1-like protein	Q8N335	ALGITLIK	NAD_Gly3P_dh_N	Family	NADP_Rossmann	NAD-dependent glycerol-3-phosphate dehydrogenase N-terminus
NGRN	Neugrin	Q9NPE2	LAEGFDVSTDVIRR	Neugrin	Family	HTH	Neugrin
NFU1	NFU1 iron-sulfur cluster scaffold homolog	Q9UMS0	GFEDGIVQLK	NifU	Family	NifU	NifU-like domain
GTPBP4	GTP-binding protein 4	Q9BZE4	ITVVPSAK	NOG1_N	Domain	NOG1_N	NOG1 N-terminal helical domain
NAA15	N-alpha-acetyltransferase 15	Q9BXJ9	GCPPVFNTLR	NatA_aux_su	Repeat	TPR	N-terminal acetyltransferase A, auxiliary subunit
NUP205	Nuclear pore complex protein Nup205	Q92621	IQQGALELLR	Nup192	Family	Nucleoporin_A	Nuclear pore complex scaffold, nucleoporins 186/192/205
NUDT9	ADP-ribose pyrophosphatase	Q9BW91	DCGEWAIPGGMVDPGEK	NUDIX	Domain	NUDIX	NUDIX domain
DHX37	Probable ATP-dependent RNA helicase DHX37	Q8IY37	QIVTAGLGDHLAR	OB_NTP_bind	Domain	OB	Oligonucleotide/oligosaccharide-binding (OB)-fold
ORC3	Origin recognition complex subunit 3	Q9UBD5	LISQLMDCCVDIK	ORC3_N	Domain	P-loop_NTPase	Origin recognition complex (ORC) subunit 3 N-terminus
ORC4	Origin recognition complex subunit 4	O43929	AHSVYNFEKPVVMK	ORC4_C	Family	AAA_lid	Origin recognition complex (ORC) subunit 4 C-terminus
OTUD6B	Deubiquitinase OTUD6B	Q8N6M0	HAYGLGEHYNSVTR	OTU	Family	Peptidase_CA	OTU-like cysteine protease
PNPLA4	Patatin-like phospholipase domain-containing protein 4	P41247	VLLASSFVPIYAGLK	Patatin	Family	Patatin	Patatin-like phospholipase
EIF3E	Eukaryotic translation initiation factor 3 subunit E	P60228	WIVNLIR	PCI	Domain	HTH	PCI domain
EIF3E	Eukaryotic translation initiation factor 3 subunit E	P60228	LFIFETFCR	PCI	Domain	HTH	PCI domain
TAX1BP3	Tax1-binding protein 3	O14907	IMQVNGWDMTMVTHDQAR	PDZ;Peptidase_M50	Domain;Family	PDZ-like;Peptidase_MA	PDZ domain;Peptidase family M50
UQCRC1	Cytochrome b-c1 complex subunit 1	P31930	LCTSATESEVAR	Peptidase_M16_C	Domain	Peptidase_ME	Peptidase M16 inactive domain
PLEKHF2	Pleckstrin homology domain-containing family F member 2	Q9H8W4	VLIGEGVLTKLCR	PH	Domain	PH	PH domain
FARSB	Phenylalanine--tRNA ligase beta subunit	Q9NSD9	TAEFQVAR	tRNA_synthFbeta	Domain	tRNA_synt_II	Phenylalanyl tRNA synthetase beta chain CLM domain
FARSB	Phenylalanine--tRNA ligase beta subunit	Q9NSD9	DLLFQALGR	PhetRS_B1	Domain	HTH	Phe-tRNA synthetase beta subunit B1 domain
FARSB	Phenylalanine--tRNA ligase beta subunit	Q9NSD9	AAGASDVVLYK	PhetRS_B1	Domain	HTH	Phe-tRNA synthetase beta subunit B1 domain
FARSB	Phenylalanine--tRNA ligase beta subunit	Q9NSD9	IDVPANRYDLLCLEGLVR	PhetRS_B1	Domain	HTH	Phe-tRNA synthetase beta subunit B1 domain
FARSB	Phenylalanine--tRNA ligase beta subunit	Q9NSD9	GLQVFKER	PhetRS_B1	Domain	HTH	Phe-tRNA synthetase beta subunit B1 domain
PIP4K2C	Phosphatidylinositol 5-phosphate 4-kinase type-2 gamma	Q8TBX8	FLISYDR	PIP5K	Family	PKinase	Phosphatidylinositol-4-phosphate 5-Kinase
PIP4K2C	Phosphatidylinositol 5-phosphate 4-kinase type-2 gamma	Q8TBX8	VYIGEEEK	PIP5K	Family	PKinase	Phosphatidylinositol-4-phosphate 5-Kinase
PFKL	ATP-dependent 6-phosphofructokinase	P17858	SEWGSLLEELVAEGK	PFK	Domain	PFK	Phosphofructokinase
GPI	Glucose-6-phosphate isomerase	P06744	AVLHVALR	PGI	Domain	SIS	Phosphoglucose isomerase
GPI	Glucose-6-phosphate isomerase	P06744	SNTPILVDGK	PGI	Domain	SIS	Phosphoglucose isomerase
GPI	Glucose-6-phosphate isomerase	P06744	MIPCDFLIPVQTQHPIRK	PGI	Domain	SIS	Phosphoglucose isomerase
GPI	Glucose-6-phosphate isomerase	P06744	KIEPELDGSAQVTSHDASTNGLINFIK	PGI	Domain	SIS	Phosphoglucose isomerase
PIK3CB	Phosphatidylinositol 4	P42338	EYAVGCLR	PI3Ka	Repeat	TPR	Phosphoinositide 3-kinase family, accessory domain (PIK domain)
NOS1AP	Carboxyl-terminal PDZ ligand of neuronal nitric oxide synthase protein	O75052	MLVMQDPIYR	PID	Domain	PH	Phosphotyrosine interaction domain (PTB/PID)
PFDN2	Prefoldin subunit 2	Q9UHV9	SSGSGAGKGAVSAEQVIAGFNR	Prefoldin_2	Coiled-coil	Prefoldin	Prefoldin subunit
PSMD5	26S proteasome non-ATPase regulatory subunit 5	Q16401	LLQAMEPVHVAR	Proteasom_PSMB	Repeat	TPR	Proteasome non-ATPase 26S subunit
PSMD5	26S proteasome non-ATPase regulatory subunit 5	Q16401	TTLCVSILER	Proteasom_PSMB	Repeat	TPR	Proteasome non-ATPase 26S subunit
PSMD5	26S proteasome non-ATPase regulatory subunit 5	Q16401	EVARLEAPLEELR	Proteasom_PSMB	Repeat	TPR	Proteasome non-ATPase 26S subunit
PSMD5	26S proteasome non-ATPase regulatory subunit 5	Q16401	LEAPLEELR	Proteasom_PSMB	Repeat	TPR	Proteasome non-ATPase 26S subunit
PSMD5	26S proteasome non-ATPase regulatory subunit 5	Q16401	ALHSVLQAVPLNELR	Proteasom_PSMB	Repeat	TPR	Proteasome non-ATPase 26S subunit
PSMD5	26S proteasome non-ATPase regulatory subunit 5	Q16401	LGPLFSLLNENHR	Proteasom_PSMB	Repeat	TPR	Proteasome non-ATPase 26S subunit
PSMD5	26S proteasome non-ATPase regulatory subunit 5	Q16401	ILTLSQIGR	Proteasom_PSMB	Repeat	TPR	Proteasome non-ATPase 26S subunit
PSMB3	Proteasome subunit beta type-3	P49720	RFGPYYTEPVIAGLDPK	Proteasome	Domain	NTN	Proteasome subunit
CAMK2B	Calcium/calmodulin-dependent protein kinase type II subunit beta	Q13554	DLKPENLLLASK	Pkinase	Domain	PKinase	Protein kinase domain
CAMK2B	Calcium/calmodulin-dependent protein kinase type II subunit beta	Q13554	NLINQMLTINPAKR	Pkinase	Domain	PKinase	Protein kinase domain
CAMK2G	Calcium/calmodulin-dependent protein kinase type II subunit gamma	Q13555	ITADQALKHPWVCQR	Pkinase	Domain	PKinase	Protein kinase domain
STK4	Serine/threonine-protein kinase 4	Q13043	KLDEDSLTKQPEEVFDVLEK	Pkinase	Domain	PKinase	Protein kinase domain
CDK2	Cyclin-dependent kinase 2	P24941	AALAHPFFQDVTKPVPHLRL	Pkinase	Domain	PKinase	Protein kinase domain
CDK5	Cyclin-dependent kinase 5	Q00535	DLLQNLLK	Pkinase	Domain	PKinase	Protein kinase domain
MAP2K3	Dual specificity mitogen-activated protein kinase kinase 3	P46734	NFEVEADDLVTISELGR	Pkinase	Domain	PKinase	Protein kinase domain
GAK	Cyclin-G-associated kinase	O14976	TPEIIDLYSNFPIGEK	Pkinase	Domain	PKinase	Protein kinase domain
CDK2	Cyclin-dependent kinase 2	P24941	DLKPQNLLINTEGAIK	Pkinase	Domain	PKinase	Protein kinase domain
AURKA	Aurora kinase A	O14965	EVEIQSHLR	Pkinase	Domain	PKinase	Protein kinase domain
PIK3R4	Phosphoinositide 3-kinase regulatory subunit 4	Q99570	ISTRPFLNNIEKR	Pkinase	Domain	PKinase	Protein kinase domain
CDK8	Cyclin-dependent kinase 8	P49336	TSNPYHHDQLDR	Pkinase	Domain	PKinase	Protein kinase domain
STK24	Serine/threonine-protein kinase 24	Q9Y6E0	NNPPTLEGNYSKPLK	Pkinase	Domain	PKinase	Protein kinase domain
CDC42BPB	Serine/threonine-protein kinase MRCK beta	Q9Y5S2	LADFGSCLK	Pkinase	Domain	PKinase	Protein kinase domain
RPS6KA3	Ribosomal protein S6 kinase alpha-3	P51812	YGQHPNIITLK	Pkinase	Domain	PKinase	Protein kinase domain
CDC42BPB	Serine/threonine-protein kinase MRCK beta	Q9Y5S2	DIKPDNVLLDVNGHIR	Pkinase	Domain	PKinase	Protein kinase domain
CSNK2A1	Casein kinase II subunit alpha	P68400	LIDWGLAEFYHPGQEYNVR	Pkinase	Domain	PKinase	Protein kinase domain
RPS6KA3	Ribosomal protein S6 kinase alpha-3	P51812	TVEYLHAQGVVHR	Pkinase	Domain	PKinase	Protein kinase domain
RPS6KA3	Ribosomal protein S6 kinase alpha-3	P51812	LTAALVLR	Pkinase	Domain	PKinase	Protein kinase domain
PPP2R5B	Serine/threonine-protein phosphatase 2A 56 kDa regulatory subunit beta isoform	Q15173	IQEPLFK	B56	Repeat	TPR	Protein phosphatase 2A regulatory B subunit (B56 family)
PPP2R5C	Serine/threonine-protein phosphatase 2A 56 kDa regulatory subunit gamma isoform	Q13362	FLESPDFQPNIAKK	B56	Repeat	TPR	Protein phosphatase 2A regulatory B subunit (B56 family)
PPM1A	Protein phosphatase 1A	P35813	VCNEVVDTCLYK	PP2C	Family	PP2C	Protein phosphatase 2C
IRAK4	Interleukin-1 receptor-associated kinase 4	Q9NWZ3	IAQGAANGINFLHENHHIHR	PK_Tyr_Ser-Thr	Domain	PKinase	Protein tyrosine and serine/threonine kinase
PKM	Pyruvate kinase PKM	P14618	NICKVVEVGSK	PK	Domain	PK_TIM	Pyruvate kinase, barrel domain
PKM	Pyruvate kinase PKM	P14618	ITLDNAYMEK	PK	Domain	PK_TIM	Pyruvate kinase, barrel domain
FASTKD5	FAST kinase domain-containing protein 5	Q7L8L6	LAVQFTNR	RAP	Domain	PDDEXK	RAP domain
RAN	GTP-binding nuclear protein Ran	P62826	DLVRVCENIPIVLCGNKVDIK	Ras	Domain	P-loop_NTPase	Ras family
RAB11B	Ras-related protein Rab-11B	Q15907	ELRDHADSNIVIMLVGNK	Ras	Domain	P-loop_NTPase	Ras family
RAB18	Ras-related protein Rab-18	Q9NP72	NDIVNMLVGNKIDKENR	Ras	Domain	P-loop_NTPase	Ras family
SMC4	Structural maintenance of chromosomes protein 4	Q9NTJ3	VAELDKITYER	SMC_N	Domain	P-loop_NTPase	RecF/RecN/SMC N terminal domain
SMC3	Structural maintenance of chromosomes protein 3	Q9UQE7	QVIIQGFR	SMC_N	Domain	P-loop_NTPase	RecF/RecN/SMC N terminal domain
PRDX5	Peroxiredoxin-5	P30044	ETDLLLDDSLVSIFGNRR	Redoxin	Domain	Thioredoxin	Redoxin
CLTC	Clathrin heavy chain 1	Q00610	QLPLVKPYLR	Clathrin	Repeat	TPR	Region in Clathrin and VPS
CLTC	Clathrin heavy chain 1	Q00610	VKQLPLVKPYLR	Clathrin	Repeat	TPR	Region in Clathrin and VPS
CLTC	Clathrin heavy chain 1	Q00610	IAAYLFKGNNR	Clathrin	Repeat	TPR	Region in Clathrin and VPS
CLTC	Clathrin heavy chain 1	Q00610	ALEHFTDLYDIKR	Clathrin	Repeat	TPR	Region in Clathrin and VPS
CLTC	Clathrin heavy chain 1	Q00610	ESNCYDPERVK	Clathrin	Repeat	TPR	Region in Clathrin and VPS
CLTC	Clathrin heavy chain 1	Q00610	LASTLVHLGEYQAAVDGAR	Clathrin	Repeat	TPR	Region in Clathrin and VPS
CLTC	Clathrin heavy chain 1	Q00610	DPHLACVAYER	Clathrin	Repeat	TPR	Region in Clathrin and VPS
CLTC	Clathrin heavy chain 1	Q00610	AYEFAER	Clathrin	Repeat	TPR	Region in Clathrin and VPS
CLTC	Clathrin heavy chain 1	Q00610	IVLDNSVFSEHR	Clathrin	Repeat	TPR	Region in Clathrin and VPS
CLTC	Clathrin heavy chain 1	Q00610	SVNESLNNLFITEEDYQALR	Clathrin	Repeat	TPR	Region in Clathrin and VPS
CLTC	Clathrin heavy chain 1	Q00610	LLYNNVSNFGR	Clathrin	Repeat	TPR	Region in Clathrin and VPS
RELA	Transcription factor p65	Q04206	CIHSFQNLGIQCVK	RHD_DNA_bind	Domain	P53-like	Rel homology DNA-binding domain
RPL36A	Large ribosomal subunit protein eL42	P83881	DSLYAQGKR	Ribosomal_L44	Family	Zn_Beta_Ribbon	Ribosomal protein L44
RPS28	Small ribosomal subunit protein eS28	P62857	NVKGPVREGDVLTLLESER	Ribosomal_S28e	Family	OB	Ribosomal protein S28e
RPS7	Small ribosomal subunit protein eS7	P62081	LTGKDVNFEFPEFQL	Ribosomal_S7e	Family	S24e_L23_L15e	Ribosomal protein S7e
METTL16	RNA N6-adenosine-methyltransferase METTL16	Q86W50	LIPTVPLR	Methyltransf_10	Family	NADP_Rossmann	RNA methyltransferase
POLR1C	DNA-directed RNA polymerases I and III subunit RPAC1	O15160	EIFRNEK	RNA_pol_L	Domain	RBP11-like	RNA polymerase Rpb3/Rpb11 dimerisation domain
HNRNPH2	Heterogeneous nuclear ribonucleoprotein H2	P55795	FFSDCKIQNGTSGIR	RRM_1	Domain	RRM	RNA recognition motif. (a.k.a. RRM, RBD, or RNP domain)
SRSF5	Serine/arginine-rich splicing factor 5	Q13243	RGFGFVEFEDPRDADDAVYELDGK	RRM_1	Domain	RRM	RNA recognition motif. (a.k.a. RRM, RBD, or RNP domain)
RBM34	RNA-binding protein 34	P42696	SLIPAEGTLSK	RRM_1	Domain	RRM	RNA recognition motif. (a.k.a. RRM, RBD, or RNP domain)
HNRNPL	Heterogeneous nuclear ribonucleoprotein L	P14866	MNCDRVFNVFCLYGNVEK	RRM_5	Domain	RRM	RNA recognition motif. (a.k.a. RRM, RBD, or RNP domain)
HNRNPA3	Heterogeneous nuclear ribonucleoprotein A3	P51991	WGTLTDCVVMR	RRM_1	Domain	RRM	RNA recognition motif. (a.k.a. RRM, RBD, or RNP domain)
HNRNPL	Heterogeneous nuclear ribonucleoprotein L	P14866	VFNVFCLYGNVEK	RRM_5	Domain	RRM	RNA recognition motif. (a.k.a. RRM, RBD, or RNP domain)
RTF2	Replication termination factor 2	Q9BY42	FCFLRCCGCVFSER	Rtf2	Family	RING	Rtf2 RING-finger
SAC3D1	SAC3 domain-containing protein 1	A6NKF1	AEVASFVADRLR	SAC3_GANP	Family	HTH	SAC3/GANP family
SCCPDH	Saccharopine dehydrogenase-like oxidoreductase	Q8NBX0	SAIYGFGDQSNLR	Sacchrp_dh_C	Domain	GADPH_aa-bio_dh	Saccharopine dehydrogenase C-terminal domain
AHCYL2	Adenosylhomocysteinase 3	Q96HN2	SQVDHVIWPDGKR	AdoHcyase_NAD	Domain	NADP_Rossmann	S-adenosyl-L-homocysteine hydrolase, NAD binding domain
AHCYL2	Adenosylhomocysteinase 3	Q96HN2	IVLLAEGR	AdoHcyase_NAD	Domain	NADP_Rossmann	S-adenosyl-L-homocysteine hydrolase, NAD binding domain
AHCYL1	S-adenosylhomocysteine hydrolase-like protein 1	O43865	VVLLAEGR	AdoHcyase_NAD	Domain	NADP_Rossmann	S-adenosyl-L-homocysteine hydrolase, NAD binding domain
SBDS	Ribosome maturation protein SBDS	Q9Y3A5	RPYTVILIER	SBDS_domain_II	Domain	EF-G_C	SBDS protein, domain II
SCP2	Sterol carrier protein 2	P22307	MNPQSAFFQGK	SCP2	Domain	SCP2	SCP-2 sterol transfer family
SCP2	Sterol carrier protein 2	P22307	LQNLQLQPGNAKL	SCP2	Domain	SCP2	SCP-2 sterol transfer family
SCP2	Sterol carrier protein 2	P22307	KLEEEGEQFVK	SCP2	Domain	SCP2	SCP-2 sterol transfer family
SCP2	Sterol carrier protein 2	P22307	IGGIFAFK	SCP2	Domain	SCP2	SCP-2 sterol transfer family
SCP2	Sterol carrier protein 2	P22307	LEEEGEQFVK	SCP2	Domain	SCP2	SCP-2 sterol transfer family
SCP2	Sterol carrier protein 2	P22307	LQNLQLQPGNAK	SCP2	Domain	SCP2	SCP-2 sterol transfer family
SCP2	Sterol carrier protein 2	P22307	LEEEGEQFVKK	SCP2	Domain	SCP2	SCP-2 sterol transfer family
SCP2	Sterol carrier protein 2	P22307	GSVLPNSDKKADCTITMADSDFLALMTGK	SCP2	Domain	SCP2	SCP-2 sterol transfer family
COA7	Cytochrome c oxidase assembly factor 7	Q96BR5	GGLTQDLK	Sel1	Repeat	TPR	Sel1 repeat
FNBP1	Formin-binding protein 1	Q96RU3	VLATDFDDEFDDEEPLPAIGTCK	SH3_1	Domain	SH3	SH3 domain
SPR	Sepiapterin reductase	P35270	LLLINNAGSLGDVSK	adh_short	Domain	NADP_Rossmann	short chain dehydrogenase
SPR	Sepiapterin reductase	P35270	VPADLGAEAGLQQLLGALR	adh_short	Domain	NADP_Rossmann	short chain dehydrogenase
PDS5B	Sister chromatid cohesion protein PDS5 homolog B	Q9NTI5	DILLVNDHLLNFVR	PDS5	Repeat	TPR	Sister chromatid cohesion protein PDS5 protein
PDS5A	Sister chromatid cohesion protein PDS5 homolog A	Q29RF7	SQLELLISPTCSCK	PDS5	Repeat	TPR	Sister chromatid cohesion protein PDS5 protein
PDS5A	Sister chromatid cohesion protein PDS5 homolog A	Q29RF7	NLPDPGKAQDFVK	PDS5	Repeat	TPR	Sister chromatid cohesion protein PDS5 protein
ELOC	Elongin-C	Q15369	VCMYFTYK	Skp1_POZ	Domain	POZ	Skp1 family, tetramerisation domain
SMARCA5	SWI/SNF-related matrix-associated actin-dependent regulator of chromatin subfamily A member 5	O60264	LGFDKENVYDELR	SLIDE	Domain	HTH	SLIDE
ERCC6L	DNA excision repair protein ERCC-6-like	Q2NKX8	ELLMETR	SNF2-rel_dom	Domain	P-loop_NTPase	SNF2-related domain
SPRYD4	SPRY domain-containing protein 4	Q8WW59	FREWAVVLADTAVTSGR	SPRY	Family	Concanavalin	SPRY domain
HNRNPUL1	Heterogeneous nuclear ribonucleoprotein U-like protein 1	Q9BUJ2	WMGIAFR	SPRY	Family	Concanavalin	SPRY domain
STARD10	START domain-containing protein 10	Q9Y365	SSQFLAPK	START	Domain	Bet_v_1_like	START domain
STARD10	START domain-containing protein 10	Q9Y365	SCVITYLAQVDPK	START	Domain	Bet_v_1_like	START domain
STARD10	START domain-containing protein 10	Q9Y365	AVSIQTGYLIQSTGPK	START	Domain	Bet_v_1_like	START domain
STARD10	START domain-containing protein 10	Q9Y365	WDSNVIETFDIAR	START	Domain	Bet_v_1_like	START domain
SULT2B1	Sulfotransferase 2B1	O00204	NHFTVAQSEAFDR	Sulfotransfer_1	Domain	P-loop_NTPase	Sulfotransferase domain
SULT2B1	Sulfotransferase 2B1	O00204	DVVVSLYHYSK	Sulfotransfer_1	Domain	P-loop_NTPase	Sulfotransferase domain
SULT2B1	Sulfotransferase 2B1	O00204	IAGQLKDPGTPDQFLR	Sulfotransfer_1	Domain	P-loop_NTPase	Sulfotransferase domain
SULT2B1	Sulfotransferase 2B1	O00204	EALGSVVAHSTFSAMK	Sulfotransfer_1	Domain	P-loop_NTPase	Sulfotransferase domain
SULT2B1	Sulfotransferase 2B1	O00204	DPGTPDQFLR	Sulfotransfer_1	Domain	P-loop_NTPase	Sulfotransferase domain
SULT2B1	Sulfotransferase 2B1	O00204	GEVQFGSWFDHIK	Sulfotransfer_1	Domain	P-loop_NTPase	Sulfotransferase domain
SULT2B1	Sulfotransferase 2B1	O00204	ICGFLGRPLGK	Sulfotransfer_1	Domain	P-loop_NTPase	Sulfotransferase domain
SULT2B1	Sulfotransferase 2B1	O00204	SVPIWER	Sulfotransfer_1	Domain	P-loop_NTPase	Sulfotransferase domain
SULT2B1	Sulfotransferase 2B1	O00204	EGDPSWIR	Sulfotransfer_1	Domain	P-loop_NTPase	Sulfotransferase domain
SULT2B1	Sulfotransferase 2B1	O00204	AKVIYMGR	Sulfotransfer_1	Domain	P-loop_NTPase	Sulfotransferase domain
SULT2B1	Sulfotransferase 2B1	O00204	DDDIFIITYPK	Sulfotransfer_1	Domain	P-loop_NTPase	Sulfotransferase domain
CLUH	Clustered mitochondria protein homolog	O75153	FLENALAVSTK	TPR_12	Repeat	TPR	Tetratricopeptide repeat
SGTA	Small glutamine-rich tetratricopeptide repeat-containing protein alpha	O43765	LGNYAGAVQDCERAICIDPAYSK	TPR_1	Repeat	TPR	Tetratricopeptide repeat
CLUH	Clustered mitochondria protein homolog	O75153	AVLMSER	TPR_12	Repeat	TPR	Tetratricopeptide repeat
CLUH	Clustered mitochondria protein homolog	O75153	LHYIMGDYAEALSNQQK	TPR_12	Repeat	TPR	Tetratricopeptide repeat
SAE1	SUMO-activating enzyme subunit 1	Q9UBE0	VVFCPVK	ThiF	Domain	NADP_Rossmann	ThiF family
UBA2	SUMO-activating enzyme subunit 2	Q9UBT2	LFKDDIR	ThiF	Domain	NADP_Rossmann	ThiF family
FASN	Fatty acid synthase	P49327	QVQPEGPYR	Thioesterase	Domain	AB_hydrolase	Thioesterase domain
FASN	Fatty acid synthase	P49327	LSIPTYGLQCTR	Thioesterase	Domain	AB_hydrolase	Thioesterase domain
HADHB	Trifunctional enzyme subunit beta	P55084	VGLPPLEK	Thiolase_C	Domain	Thiolase	Thiolase, C-terminal domain
HADHB	Trifunctional enzyme subunit beta	P55084	DQLLLGPTYATPK	Thiolase_C	Domain	Thiolase	Thiolase, C-terminal domain
HADHB	Trifunctional enzyme subunit beta	P55084	DFMYVSQDPKDQLLLGPTYATPK	Thiolase_C	Domain	Thiolase	Thiolase, C-terminal domain
HADHB	Trifunctional enzyme subunit beta	P55084	FNNWGGSLSLGHPFGATGCR	Thiolase_C	Domain	Thiolase	Thiolase, C-terminal domain
HADHB	Trifunctional enzyme subunit beta	P55084	LAAAFAVSRLEQDEYALR	Thiolase_N	Domain	Thiolase	Thiolase, N-terminal domain
HADHB	Trifunctional enzyme subunit beta	P55084	NVVVVDGVR	Thiolase_N	Domain	Thiolase	Thiolase, N-terminal domain
HADHB	Trifunctional enzyme subunit beta	P55084	LAAAFAVSR	Thiolase_N	Domain	Thiolase	Thiolase, N-terminal domain
HADHB	Trifunctional enzyme subunit beta	P55084	LEQDEYALR	Thiolase_N	Domain	Thiolase	Thiolase, N-terminal domain
HADHB	Trifunctional enzyme subunit beta	P55084	AALTGLLHR	Thiolase_N	Domain	Thiolase	Thiolase, N-terminal domain
HADHB	Trifunctional enzyme subunit beta	P55084	DNGIRPSSLEQMAK	Thiolase_N	Domain	Thiolase	Thiolase, N-terminal domain
P4HB	Protein disulfide-isomerase	P07237	EADDIVNWLK	Thioredoxin	Domain	Thioredoxin	Thioredoxin
P4HB	Protein disulfide-isomerase	P07237	EADDIVNWLKK	Thioredoxin	Domain	Thioredoxin	Thioredoxin
P4HB	Protein disulfide-isomerase	P07237	VDATEESDLAQQYGVR	Thioredoxin	Domain	Thioredoxin	Thioredoxin
P4HB	Protein disulfide-isomerase	P07237	MDSTANEVEAVK	Thioredoxin	Domain	Thioredoxin	Thioredoxin
P4HB	Protein disulfide-isomerase	P07237	LKAEGSEIR	Thioredoxin	Domain	Thioredoxin	Thioredoxin
P4HB	Protein disulfide-isomerase	P07237	NFEDVAFDEKK	Thioredoxin	Domain	Thioredoxin	Thioredoxin
P4HB	Protein disulfide-isomerase	P07237	TLDGFKK	Thioredoxin	Domain	Thioredoxin	Thioredoxin
P4HB	Protein disulfide-isomerase	P07237	TVIDYNGER	Thioredoxin	Domain	Thioredoxin	Thioredoxin
P4HB	Protein disulfide-isomerase	P07237	ALAPEYAK	Thioredoxin	Domain	Thioredoxin	Thioredoxin
P4HB	Protein disulfide-isomerase	P07237	KSNFAEALAAHK	Thioredoxin	Domain	Thioredoxin	Thioredoxin
P4HB	Protein disulfide-isomerase	P07237	LAKVDATEESDLAQQYGVR	Thioredoxin	Domain	Thioredoxin	Thioredoxin
P4HB	Protein disulfide-isomerase	P07237	VHSFPTLK	Thioredoxin	Domain	Thioredoxin	Thioredoxin
P4HB	Protein disulfide-isomerase	P07237	SNFAEALAAHK	Thioredoxin	Domain	Thioredoxin	Thioredoxin
P4HB	Protein disulfide-isomerase	P07237	AAGKLKAEGSEIR	Thioredoxin	Domain	Thioredoxin	Thioredoxin
P4HB	Protein disulfide-isomerase	P07237	ITEFCHR	Thioredoxin_6	Domain	Thioredoxin	Thioredoxin-like domain
PDIA3	Protein disulfide-isomerase A3	P30101	FAHTNVESLVNEYDDNGEGIILFRPSHLTNK	Thioredoxin_6	Domain	Thioredoxin	Thioredoxin-like domain
PDIA3	Protein disulfide-isomerase A3	P30101	KFIQENIFGICPHMTEDNKDLIQGK	Thioredoxin_6	Domain	Thioredoxin	Thioredoxin-like domain
UGGT1	UDP-glucose:glycoprotein glucosyltransferase 1	Q9NYU2	ILETTTFFQR	Thioredoxin_14	Domain	Thioredoxin	Thioredoxin-like domain
P4HB	Protein disulfide-isomerase	P07237	YQLDKDGVVLFK	Thioredoxin_6	Domain	Thioredoxin	Thioredoxin-like domain
THBS1	Thrombospondin-1	P07996	QVTQSYWDTNPTR	TSP_C	Family	Concanavalin	Thrombospondin C-terminal region
DTYMK	Thymidylate kinase	P23919	STEIGKLLSSYLQKK	Thymidylate_kin	Domain	P-loop_NTPase	Thymidylate kinase
RUVBL2	RuvB-like 2	Q9Y230	AAGVVLEMIR	TIP49	Domain	P-loop_NTPase	TIP49 P-loop domain
TALDO1	Transaldolase	P37837	LLGELLQDNAK	TAL_FSA	Domain	TIM_barrel	Transaldolase/Fructose-6-phosphate aldolase
TALDO1	Transaldolase	P37837	LVPVLSAK	TAL_FSA	Domain	TIM_barrel	Transaldolase/Fructose-6-phosphate aldolase
PDHB	Pyruvate dehydrogenase E1 component subunit beta	P11177	TIRPMDMETIEASVMK	Transketolase_C	Domain	TKC_like	Transketolase, C-terminal domain
TRAPPC6A	Trafficking protein particle complex subunit 6A	O75865	FLAFTCGLLR	TRAPP	Family	HNOX-like	Transport protein particle (TRAPP) component
TRMT10C	tRNA methyltransferase 10 homolog C	Q7L0Y3	WDKLLLTSTEK	tRNA_m1G_MT	Family	SPOUT	tRNA (Guanine-1)-methyltransferase
EPRS1	Bifunctional glutamate/proline--tRNA ligase	P07814	QFIAAQGSSR	tRNA-synt_1c	Domain	HUP	tRNA synthetases class I (E and Q), catalytic domain
EPRS1	Bifunctional glutamate/proline--tRNA ligase	P07814	AYVDDTPAEQMKAER	tRNA-synt_1c	Domain	HUP	tRNA synthetases class I (E and Q), catalytic domain
EPRS1	Bifunctional glutamate/proline--tRNA ligase	P07814	GSQFGQSCCLR	tRNA-synt_1c	Domain	HUP	tRNA synthetases class I (E and Q), catalytic domain
EPRS1	Bifunctional glutamate/proline--tRNA ligase	P07814	GMTVEGLK	tRNA-synt_1c	Domain	HUP	tRNA synthetases class I (E and Q), catalytic domain
EPRS1	Bifunctional glutamate/proline--tRNA ligase	P07814	LNLNNTVLSK	tRNA-synt_1c	Domain	HUP	tRNA synthetases class I (E and Q), catalytic domain
EPRS1	Bifunctional glutamate/proline--tRNA ligase	P07814	KGSQFGQSCCLR	tRNA-synt_1c	Domain	HUP	tRNA synthetases class I (E and Q), catalytic domain
EPRS1	Bifunctional glutamate/proline--tRNA ligase	P07814	AYVDDTPAEQMK	tRNA-synt_1c	Domain	HUP	tRNA synthetases class I (E and Q), catalytic domain
EPRS1	Bifunctional glutamate/proline--tRNA ligase	P07814	AALLNQHYQVNFK	tRNA-synt_1c	Domain	HUP	tRNA synthetases class I (E and Q), catalytic domain
VARS1	Valine--tRNA ligase	P26640	EVYLHAIVR	tRNA-synt_1	Family	HUP	tRNA synthetases class I (I, L, M and V)
IARS1	Isoleucine--tRNA ligase	P41252	VENMVDQLLR	tRNA-synt_1	Family	HUP	tRNA synthetases class I (I, L, M and V)
IARS1	Isoleucine--tRNA ligase	P41252	SDTPLIYK	tRNA-synt_1	Family	HUP	tRNA synthetases class I (I, L, M and V)
IARS1	Isoleucine--tRNA ligase	P41252	LYLINSPVVR	tRNA-synt_1	Family	HUP	tRNA synthetases class I (I, L, M and V)
RARS2	Probable arginine--tRNA ligase	Q5T160	STIIGNFIANLK	tRNA-synt_1d	Family	HUP	tRNA synthetases class I (R)
RARS2	Probable arginine--tRNA ligase	Q5T160	IVVEFSSPNVAK	tRNA-synt_1d	Family	HUP	tRNA synthetases class I (R)
YARS1	Tyrosine--tRNA ligase	P54577	IFTFAEK	tRNA-synt_1b	Family	HUP	tRNA synthetases class I (W and Y)
YARS1	Tyrosine--tRNA ligase	P54577	AMLESIGVPLEK	tRNA-synt_1b	Family	HUP	tRNA synthetases class I (W and Y)
YARS1	Tyrosine--tRNA ligase	P54577	NSVEVALNK	tRNA-synt_1b	Family	HUP	tRNA synthetases class I (W and Y)
YARS1	Tyrosine--tRNA ligase	P54577	VDAQFGGIDQR	tRNA-synt_1b	Family	HUP	tRNA synthetases class I (W and Y)
YARS1	Tyrosine--tRNA ligase	P54577	APWELLELR	tRNA-synt_1b	Family	HUP	tRNA synthetases class I (W and Y)
YARS1	Tyrosine--tRNA ligase	P54577	HVLFPLKSEFVILRDEK	tRNA-synt_1b	Family	HUP	tRNA synthetases class I (W and Y)
YARS1	Tyrosine--tRNA ligase	P54577	EYTLDVYR	tRNA-synt_1b	Family	HUP	tRNA synthetases class I (W and Y)
YARS1	Tyrosine--tRNA ligase	P54577	LSSVVTQHDSKK	tRNA-synt_1b	Family	HUP	tRNA synthetases class I (W and Y)
YARS1	Tyrosine--tRNA ligase	P54577	HVLFPLK	tRNA-synt_1b	Family	HUP	tRNA synthetases class I (W and Y)
YARS1	Tyrosine--tRNA ligase	P54577	YLPALGYSKR	tRNA-synt_1b	Family	HUP	tRNA synthetases class I (W and Y)
YARS1	Tyrosine--tRNA ligase	P54577	FIKGTDYQLSK	tRNA-synt_1b	Family	HUP	tRNA synthetases class I (W and Y)
YARS1	Tyrosine--tRNA ligase	P54577	IYWGTATTGKPHVAYFVPMSK	tRNA-synt_1b	Family	HUP	tRNA synthetases class I (W and Y)
YARS1	Tyrosine--tRNA ligase	P54577	NLQEVLGEEKLKEILK	tRNA-synt_1b	Family	HUP	tRNA synthetases class I (W and Y)
KARS1	Lysine--tRNA ligase	Q15046	VAMFLTDSNNIK	tRNA-synt_2	Domain	tRNA_synt_II	tRNA synthetases class II (D, K and N)
FARSA	Phenylalanine--tRNA ligase alpha subunit	Q9Y285	YGINNIR	tRNA-synt_2d	Domain	tRNA_synt_II	tRNA synthetases class II core domain (F)
FARSA	Phenylalanine--tRNA ligase alpha subunit	Q9Y285	DQHDTFFLRDPAEALQLPMDYVQR	tRNA-synt_2d	Domain	tRNA_synt_II	tRNA synthetases class II core domain (F)
FARSA	Phenylalanine--tRNA ligase alpha subunit	Q9Y285	VNLQMVYDSPLCR	tRNA-synt_2d	Domain	tRNA_synt_II	tRNA synthetases class II core domain (F)
FARSA	Phenylalanine--tRNA ligase alpha subunit	Q9Y285	LGITQLR	tRNA-synt_2d	Domain	tRNA_synt_II	tRNA synthetases class II core domain (F)
FARSA	Phenylalanine--tRNA ligase alpha subunit	Q9Y285	FKPAYNPYTEPSMEVFSYHQGLKK	tRNA-synt_2d	Domain	tRNA_synt_II	tRNA synthetases class II core domain (F)
FARSA	Phenylalanine--tRNA ligase alpha subunit	Q9Y285	LAQKKPFTPVK	tRNA-synt_2d	Domain	tRNA_synt_II	tRNA synthetases class II core domain (F)
FARSA	Phenylalanine--tRNA ligase alpha subunit	Q9Y285	YFSIDRVFR	tRNA-synt_2d	Domain	tRNA_synt_II	tRNA synthetases class II core domain (F)
FARSA	Phenylalanine--tRNA ligase alpha subunit	Q9Y285	THSQGGYGSQGYK	tRNA-synt_2d	Domain	tRNA_synt_II	tRNA synthetases class II core domain (F)
TUBB4B	Tubulin beta-4B chain	P68371	KEAESCDCLQGFQLTHSLGGGTGSGMGTLLISK	Tubulin	Domain	Tubulin	Tubulin/FtsZ family, GTPase domain
TTLL12	Tubulin--tyrosine ligase-like protein 12	Q14166	AMYAVDLMLK	TTL	Family	ATP-grasp	Tubulin-tyrosine ligase family
TTLL12	Tubulin--tyrosine ligase-like protein 12	Q14166	YIESPVLFLR	TTL	Family	ATP-grasp	Tubulin-tyrosine ligase family
IFIH1	Interferon-induced helicase C domain-containing protein 1	Q9BYX4	VLLVEQLFRK	ResIII	Family	P-loop_NTPase	Type III restriction enzyme, res subunit
PRPF8	Pre-mRNA-processing-splicing factor 8	Q6P2Q9	ISLIQIFR	U6-snRNA_bdg	Domain	H-int	U6-snRNA interacting domain of PrP8
PRPF8	Pre-mRNA-processing-splicing factor 8	Q6P2Q9	QNPFWWTHQR	U6-snRNA_bdg	Domain	H-int	U6-snRNA interacting domain of PrP8
USP16	Ubiquitin carboxyl-terminal hydrolase 16	Q9Y5T5	VLYSLYGVVEHSGTMR	UCH	Family	Peptidase_CA	Ubiquitin carboxyl-terminal hydrolase
USP7	Ubiquitin carboxyl-terminal hydrolase 7	Q93009	FLTLPPVLHLQLMR	UCH	Family	Peptidase_CA	Ubiquitin carboxyl-terminal hydrolase
USP14	Ubiquitin carboxyl-terminal hydrolase 14	P54578	YLFTGLK	UCH	Family	Peptidase_CA	Ubiquitin carboxyl-terminal hydrolase
USP28	Ubiquitin carboxyl-terminal hydrolase 28	Q96RU2	SSEEQQQDVSEFTHK	UCH	Family	Peptidase_CA	Ubiquitin carboxyl-terminal hydrolase
USP28	Ubiquitin carboxyl-terminal hydrolase 28	Q96RU2	FEFNQSLGQPEK	UCH	Family	Peptidase_CA	Ubiquitin carboxyl-terminal hydrolase
USP1	Ubiquitin carboxyl-terminal hydrolase 1	O94782	WAISQFASVER	UCH	Family	Peptidase_CA	Ubiquitin carboxyl-terminal hydrolase
UCHL5	Ubiquitin carboxyl-terminal hydrolase isozyme L5	Q9Y5K5	WQPGEEPAGSVVQDSR	Peptidase_C12	Domain	Peptidase_CA	Ubiquitin carboxyl-terminal hydrolase, family 1
UBE2I	SUMO-conjugating enzyme UBC9	P63279	MLFKDDYPSSPPK	UQ_con	Domain	UBC	Ubiquitin-conjugating enzyme
UBE2L3	Ubiquitin-conjugating enzyme E2 L3	P68036	IYHPNIDEK	UQ_con	Domain	UBC	Ubiquitin-conjugating enzyme
FARSA	Phenylalanine--tRNA ligase alpha subunit	Q9Y285	LDAEPRPPPTQEAA	Unannotated	Unannotated	Unannotated	Unannotated
AAR2	Protein AAR2 homolog	Q9Y312	AAVQMDPELAKR	Unannotated	Unannotated	Unannotated	Unannotated
MCM4	DNA replication licensing factor MCM4	P33991	LHGLDEEAEQK	Unannotated	Unannotated	Unannotated	Unannotated
DECR1	2	Q16698	VTKEQWDTIEELIR	Unannotated	Unannotated	Unannotated	Unannotated
HADHA	Trifunctional enzyme subunit alpha	P40939	GLYPAPLK	Unannotated	Unannotated	Unannotated	Unannotated
HADHA	Trifunctional enzyme subunit alpha	P40939	TGIEQGSDAGYLCESQK	Unannotated	Unannotated	Unannotated	Unannotated
MCM6	DNA replication licensing factor MCM6	Q14566	LVFLACCVAPTNPR	Unannotated	Unannotated	Unannotated	Unannotated
YARS1	Tyrosine--tRNA ligase	P54577	NLQEVLGEEKLK	Unannotated	Unannotated	Unannotated	Unannotated
ACOT1	Acyl-coenzyme A thioesterase 1	Q86TX2	AATLILEPAGR	Unannotated	Unannotated	Unannotated	Unannotated
CES2	Cocaine esterase	O00748	IQELEEPEER	Unannotated	Unannotated	Unannotated	Unannotated
PDCD2L	Programmed cell death protein 2-like	Q9BRP1	AAVLKPVLLGLR	Unannotated	Unannotated	Unannotated	Unannotated
YARS1	Tyrosine--tRNA ligase	P54577	FNTPALKK	Unannotated	Unannotated	Unannotated	Unannotated
CCAR2	Cell cycle and apoptosis regulator protein 2	Q8N163	INPLPGGR	Unannotated	Unannotated	Unannotated	Unannotated
PDCD2L	Programmed cell death protein 2-like	Q9BRP1	LLHVFACACPGCSTGGAR	Unannotated	Unannotated	Unannotated	Unannotated
MCM4	DNA replication licensing factor MCM4	P33991	RLHGLDEEAEQK	Unannotated	Unannotated	Unannotated	Unannotated
TRMT10C	tRNA methyltransferase 10 homolog C	Q7L0Y3	SSVQEECVSTISSSKDEDPLAATR	Unannotated	Unannotated	Unannotated	Unannotated
MCM6	DNA replication licensing factor MCM6	Q14566	IEESIDR	Unannotated	Unannotated	Unannotated	Unannotated
CLUH	Clustered mitochondria protein homolog	O75153	ERPLCPLQPQNR	Unannotated	Unannotated	Unannotated	Unannotated
PDCD2L	Programmed cell death protein 2-like	Q9BRP1	SQCLQVPER	Unannotated	Unannotated	Unannotated	Unannotated
HADHA	Trifunctional enzyme subunit alpha	P40939	ALMGLYHGQVLCKK	Unannotated	Unannotated	Unannotated	Unannotated
DECR1	2	Q16698	EQWDTIEELIRK	Unannotated	Unannotated	Unannotated	Unannotated
ZNF45	Zinc finger protein 45	Q02386	YLPHEELFCSQIWQQITR	Unannotated	Unannotated	Unannotated	Unannotated
YARS1	Tyrosine--tRNA ligase	P54577	NLQEVLGEEK	Unannotated	Unannotated	Unannotated	Unannotated
AAR2	Protein AAR2 homolog	Q9Y312	AAVQMDPELAK	Unannotated	Unannotated	Unannotated	Unannotated
CLUH	Clustered mitochondria protein homolog	O75153	GFYLNQSTAYHFNPKPASPR	Unannotated	Unannotated	Unannotated	Unannotated
CKAP5	Cytoskeleton-associated protein 5	Q14008	LLPDTINSINLDR	Unannotated	Unannotated	Unannotated	Unannotated
SEPHS2	Selenide	Q99611	VIEVLPR	Unannotated	Unannotated	Unannotated	Unannotated
DOHH	Deoxyhypusine hydroxylase	Q9BU89	EALLDESRPLFER	Unannotated	Unannotated	Unannotated	Unannotated
ABHD5	1-acylglycerol-3-phosphate O-acyltransferase ABHD5	Q8WTS1	ALGAALTPFNPLAGLR	Unannotated	Unannotated	Unannotated	Unannotated
DOHH	Deoxyhypusine hydroxylase	Q9BU89	RLEWLQQHGGEPAAGPYLSVDPAPPAEER	Unannotated	Unannotated	Unannotated	Unannotated
HADHA	Trifunctional enzyme subunit alpha	P40939	NKFGAPQKDVK	Unannotated	Unannotated	Unannotated	Unannotated
SPR	Sepiapterin reductase	P35270	SGAHVDFYDK	Unannotated	Unannotated	Unannotated	Unannotated
MTA1	Metastasis-associated protein MTA1	Q13330	AGVVNGTGAPGQSPGAGR	Unannotated	Unannotated	Unannotated	Unannotated
TES	Testin	Q9UGI8	MGLGHEQGFGAPCLKCK	Unannotated	Unannotated	Unannotated	Unannotated
DECR1	2	Q16698	EQWDTIEELIR	Unannotated	Unannotated	Unannotated	Unannotated
ZBTB11	Zinc finger and BTB domain-containing protein 11	O95625	YLTNEREPYAPGTEGNVK	Unannotated	Unannotated	Unannotated	Unannotated
REPS1	RalBP1-associated Eps domain-containing protein 1	Q96D71	HAASYSSDSENQGSYSGVIPPPPGR	Unannotated	Unannotated	Unannotated	Unannotated
ICMT	Protein-S-isoprenylcysteine O-methyltransferase	O60725	RVPTGLPFIK	Unannotated	Unannotated	Unannotated	Unannotated
CLUH	Clustered mitochondria protein homolog	O75153	QVSITASTR	Unannotated	Unannotated	Unannotated	Unannotated
HEATR3	HEAT repeat-containing protein 3	Q7Z4Q2	TAFPNSIAVDLCSRNPTWKPLIR	Unannotated	Unannotated	Unannotated	Unannotated
DOHH	Deoxyhypusine hydroxylase	Q9BU89	LREALLDESRPLFER	Unannotated	Unannotated	Unannotated	Unannotated
DECR1	2	Q16698	FFSPLQK	Unannotated	Unannotated	Unannotated	Unannotated
CRNKL1	Crooked neck-like protein 1	Q9BZJ0	AIYELAISQPR	Unannotated	Unannotated	Unannotated	Unannotated
SRRT	Serrate RNA effector molecule homolog	Q9BXP5	SVNIKEICWNLQNIR	Unannotated	Unannotated	Unannotated	Unannotated
RBM42	RNA-binding protein 42	Q9BTD8	TAAGSSWEDPSLLEWDADDFR	Unannotated	Unannotated	Unannotated	Unannotated
LLGL2	LLGL scribble cell polarity complex component 2	Q6P1M3	LVAFGTSHGFGLFDHQQRR	Unannotated	Unannotated	Unannotated	Unannotated
CRLF3	Cytokine receptor-like factor 3	Q8IUI8	ENVEAAQSYR	Unannotated	Unannotated	Unannotated	Unannotated
POGZ	Pogo transposable element with ZNF domain	Q7Z3K3	ADTDLFMECEEEELEPWQK	Unannotated	Unannotated	Unannotated	Unannotated
INO80B	INO80 complex subunit B	Q9C086	AWLDEDSNLSPSPLR	Unannotated	Unannotated	Unannotated	Unannotated
SNRPC	U1 small nuclear ribonucleoprotein C	P09234	TTAAFQQGK	Unannotated	Unannotated	Unannotated	Unannotated
CLUH	Clustered mitochondria protein homolog	O75153	NFAVLQK	Unannotated	Unannotated	Unannotated	Unannotated
HEXIM1	Protein HEXIM1	O94992	VRELELELDRLR	Unannotated	Unannotated	Unannotated	Unannotated
HADHA	Trifunctional enzyme subunit alpha	P40939	FGELVMTK	Unannotated	Unannotated	Unannotated	Unannotated
MDC1	Mediator of DNA damage checkpoint protein 1	Q14676	TPESIVPIAPELQPSTSR	Unannotated	Unannotated	Unannotated	Unannotated
UBAP1	Ubiquitin-associated protein 1	Q9NZ09	GGSGSVLQDEEVLASLER	Unannotated	Unannotated	Unannotated	Unannotated
MVK	Mevalonate kinase	Q03426	VDLSLPNIGIK	Unannotated	Unannotated	Unannotated	Unannotated
SNAPC4	snRNA-activating protein complex subunit 4	Q5SXM2	GALDLGLLSQEGEAATQQWLGGQR	Unannotated	Unannotated	Unannotated	Unannotated
MACF1	Microtubule-actin cross-linking factor 1	O94854	DIPLDCDCVLTGEDILGEVANR	Unannotated	Unannotated	Unannotated	Unannotated
SRCIN1	SRC kinase signaling inhibitor 1	Q9C0H9	LNNLSPAPHLASGSPPPGLPSGLPSGLQSGSPSR	Unannotated	Unannotated	Unannotated	Unannotated
PCNT	Pericentrin	O95613	TVNDWTSSNEK	Unannotated	Unannotated	Unannotated	Unannotated
R3HCC1L	Coiled-coil domain-containing protein R3HCC1L	Q7Z5L2	VLSDSAVGIDLGSTGDTTEALHELR	Unannotated	Unannotated	Unannotated	Unannotated
ANKHD1	Ankyrin repeat and KH domain-containing protein 1	Q8IWZ3	RLTSSVSCALDEAAAALTR	Unannotated	Unannotated	Unannotated	Unannotated
BCL2L13	Bcl-2-like protein 13	Q9BXK5	EPDTEVITVEK	Unannotated	Unannotated	Unannotated	Unannotated
ATAD5	ATPase family AAA domain-containing protein 5	Q96QE3	QMENTTSHANSRDNVTEAAQLNDSIITVSYEEFLK	Unannotated	Unannotated	Unannotated	Unannotated
CDK13	Cyclin-dependent kinase 13	Q14004	TKPLTPSIGAK	Unannotated	Unannotated	Unannotated	Unannotated
NUDT8	Mitochondrial coenzyme A diphosphatase NUDT8	Q8WV74	YTLPVFLHGPHR	Unannotated	Unannotated	Unannotated	Unannotated
CDC5L	Cell division cycle 5-like protein	Q99459	KPALGFYDTSEENYQALDADFR	Unannotated	Unannotated	Unannotated	Unannotated
MAPK8	Mitogen-activated protein kinase 8	P45983	DNNFYSVEIGDSTFTVLKR	Unannotated	Unannotated	Unannotated	Unannotated
RSBN1L	Lysine-specific demethylase RSBN1L	Q6PCB5	QTTAAVGVLK	Unannotated	Unannotated	Unannotated	Unannotated
SFSWAP	Splicing factor	Q12872	KAALFLQTLK	Unannotated	Unannotated	Unannotated	Unannotated
CLUH	Clustered mitochondria protein homolog	O75153	GLEMDPIDCTPPEYILPGSR	Unannotated	Unannotated	Unannotated	Unannotated
EIF3A	Eukaryotic translation initiation factor 3 subunit A	Q14152	DIDIEDLEELDPDFIMAK	Unannotated	Unannotated	Unannotated	Unannotated
SNRNP48	U11/U12 small nuclear ribonucleoprotein 48 kDa protein	Q6IEG0	IYSSLPVEVPLNHKR	Unannotated	Unannotated	Unannotated	Unannotated
MVK	Mevalonate kinase	Q03426	EVAGLPDDCAVTER	Unannotated	Unannotated	Unannotated	Unannotated
TNIP1	TNFAIP3-interacting protein 1	Q15025	SELLEVNKQWDQHFR	Unannotated	Unannotated	Unannotated	Unannotated
NASP	Nuclear autoantigenic sperm protein	P49321	SAEEPQEKVDLTLDWLTETSEEAK	Unannotated	Unannotated	Unannotated	Unannotated
ERCC6L	DNA excision repair protein ERCC-6-like	Q2NKX8	AAEATNDYETLVKR	Unannotated	Unannotated	Unannotated	Unannotated
MVK	Mevalonate kinase	Q03426	VALAVSLNLR	Unannotated	Unannotated	Unannotated	Unannotated
G3BP2	Ras GTPase-activating protein-binding protein 2	Q9UN86	ERPGFPPRGPRPGR	Unannotated	Unannotated	Unannotated	Unannotated
MRPS10	Small ribosomal subunit protein uS10m	P82664	DLTKPVVTISDEPDILYKR	Unannotated	Unannotated	Unannotated	Unannotated
SUGP1	SURP and G-patch domain-containing protein 1	Q8IWZ8	EWAEQLTK	Unannotated	Unannotated	Unannotated	Unannotated
CRNKL1	Crooked neck-like protein 1	Q9BZJ0	VWISFAQFELSSGK	Unannotated	Unannotated	Unannotated	Unannotated
GFER	FAD-linked sulfhydryl oxidase ALR	P55789	GRFHGGNLFFLPGGAR	Unannotated	Unannotated	Unannotated	Unannotated
NCAPG2	Condensin-2 complex subunit G2	Q86XI2	NRECLLSAPR	Unannotated	Unannotated	Unannotated	Unannotated
NENF	Neudesin	Q9UMX5	RILNEDGSPNLDFKPEDQPHFDIKDEF	Unannotated	Unannotated	Unannotated	Unannotated
SUPT5H	Transcription elongation factor SPT5	O00267	SSDGEEAEVDEER	Unannotated	Unannotated	Unannotated	Unannotated
SYAP1	Synapse-associated protein 1	Q96A49	SVEEGKIDGIIDKTIIGDFQK	Unannotated	Unannotated	Unannotated	Unannotated
CASKIN2	Caskin-2	Q8WXE0	LPSAPTPLRPGFSR	Unannotated	Unannotated	Unannotated	Unannotated
GCN1	Stalled ribosome sensor GCN1	Q92616	LTEVLTDSHVKVQK	Unannotated	Unannotated	Unannotated	Unannotated
MSH6	DNA mismatch repair protein Msh6	P52701	TFFGDDFIPNDILIGCEEEEQENGK	Unannotated	Unannotated	Unannotated	Unannotated
RBM8A	RNA-binding protein 8A	Q9Y5S9	ADVLDLHEAGGEDFAMDEDGDESIHK	Unannotated	Unannotated	Unannotated	Unannotated
MAP2K2	Dual specificity mitogen-activated protein kinase kinase 2	P36507	RKPVLPALTINPTIAEGPSPTSEGASEANLVDLQK	Unannotated	Unannotated	Unannotated	Unannotated
INCENP	Inner centromere protein	Q9NQS7	WLQQEEEERR	Unannotated	Unannotated	Unannotated	Unannotated
UBXN7	UBX domain-containing protein 7	O94888	SIFDGFRDFQTETIR	Unannotated	Unannotated	Unannotated	Unannotated
TLN1	Talin-1	Q9Y490	ALAVNPRDPPSWSVLAGHSR	Unannotated	Unannotated	Unannotated	Unannotated
RNF40	E3 ubiquitin-protein ligase BRE1B	O75150	KVEVYADADEILQEEIKEYK	Unannotated	Unannotated	Unannotated	Unannotated
LARP1	La-related protein 1	Q6PKG0	GLSASLPDLDSENWIEVK	Unannotated	Unannotated	Unannotated	Unannotated
NSD3	Histone-lysine N-methyltransferase NSD3	Q9BZ95	ELFESSLCGDLLNEVQASEHTK	Unannotated	Unannotated	Unannotated	Unannotated
MARK3	MAP/microtubule affinity-regulating kinase 3	P27448	YSDHAGPAIPSVVAYPKR	Unannotated	Unannotated	Unannotated	Unannotated
KNOP1	Lysine-rich nucleolar protein 1	Q1ED39	KGAQDPTAFSVQDPWFCEAR	Unannotated	Unannotated	Unannotated	Unannotated
EIF3A	Eukaryotic translation initiation factor 3 subunit A	Q14152	AFKDIDIEDLEELDPDFIMAK	Unannotated	Unannotated	Unannotated	Unannotated
SPAST	Spastin	Q9UBP0	NVDSNLANLIMNEIVDNGTAVK	Unannotated	Unannotated	Unannotated	Unannotated
HSDL2	Hydroxysteroid dehydrogenase-like protein 2	Q6YN16	LQLQPKPR	Unannotated	Unannotated	Unannotated	Unannotated
POLR2I	DNA-directed RNA polymerase II subunit RPB9	P36954	ITHEVDELTQIIADVSQDPTLPR	Unannotated	Unannotated	Unannotated	Unannotated
INPP4A	Inositol polyphosphate-4-phosphatase type I A	Q96PE3	SDQRPPVTR	Unannotated	Unannotated	Unannotated	Unannotated
SYNE2	Nesprin-2	Q8WXH0	ALVSNLISTKEELMK	Unannotated	Unannotated	Unannotated	Unannotated
NUP188	Nucleoporin NUP188	Q5SRE5	GAPSSPATGVLPSPQGK	Unannotated	Unannotated	Unannotated	Unannotated
SYNE2	Nesprin-2	Q8WXH0	GSMFDELMAR	Unannotated	Unannotated	Unannotated	Unannotated
SPAG9	C-Jun-amino-terminal kinase-interacting protein 4	O60271	KPEPPVNLK	Unannotated	Unannotated	Unannotated	Unannotated
ACACA	Acetyl-CoA carboxylase 1	Q13085	RWFVEVEGTVK	Unannotated	Unannotated	Unannotated	Unannotated
BZW1	eIF5-mimic protein 2	Q7L1Q6	LMELFPANKQSVEHFTK	Unannotated	Unannotated	Unannotated	Unannotated
NUMA1	Nuclear mitotic apparatus protein 1	Q14980	QPEWLEEQQGR	Unannotated	Unannotated	Unannotated	Unannotated
RMC1	Regulator of MON1-CCZ1 complex	Q96DM3	LMDFLLQR	Unannotated	Unannotated	Unannotated	Unannotated
UTRN	Utrophin	P46939	TSWINLK	Unannotated	Unannotated	Unannotated	Unannotated
XPO7	Exportin-7	Q9UIA9	GIAFAFNAK	Unannotated	Unannotated	Unannotated	Unannotated
NAP1L1	Nucleosome assembly protein 1-like 1	P55209	QLTVQMMQNPQILAALQER	Unannotated	Unannotated	Unannotated	Unannotated
PRPF8	Pre-mRNA-processing-splicing factor 8	Q6P2Q9	SGMSHEEDQLIPNLYR	Unannotated	Unannotated	Unannotated	Unannotated
RELCH	RAB11-binding protein RELCH	Q9P260	QMILTGCVAFAR	Unannotated	Unannotated	Unannotated	Unannotated
HIRIP3	HIRA-interacting protein 3	Q9BW71	LLGSCCSHKER	Unannotated	Unannotated	Unannotated	Unannotated
ITCH	E3 ubiquitin-protein ligase Itchy homolog	Q96J02	FWCQQLAMPQHIK	Unannotated	Unannotated	Unannotated	Unannotated
EXOC4	Exocyst complex component 4	Q96A65	KMNLHLVLIDELHR	Unannotated	Unannotated	Unannotated	Unannotated
RNF20	E3 ubiquitin-protein ligase BRE1A	Q5VTR2	KAMEAAQLADDLK	Unannotated	Unannotated	Unannotated	Unannotated
GAPDH	Glyceraldehyde-3-phosphate dehydrogenase	P04406	RVIISAPSADAPMFVMGVNHEKYDNSLK	Unannotated	Unannotated	Unannotated	Unannotated
XPO4	Exportin-4	Q9C0E2	VMELFFTVHR	Unannotated	Unannotated	Unannotated	Unannotated
MVK	Mevalonate kinase	Q03426	RSPALQILLTNTKVPR	Unannotated	Unannotated	Unannotated	Unannotated
DAXX	Death domain-associated protein 6	Q9UER7	SLAMSRLDEVISK	Unannotated	Unannotated	Unannotated	Unannotated
GPATCH8	G patch domain-containing protein 8	Q9UKJ3	KPSVSEEVQATPNK	Unannotated	Unannotated	Unannotated	Unannotated
TNPO1	Transportin-1	Q92973	LIPVLVNGMK	Unannotated	Unannotated	Unannotated	Unannotated
MVK	Mevalonate kinase	Q03426	MLSEVLLVSAPGK	Unannotated	Unannotated	Unannotated	Unannotated
CRNKL1	Crooked neck-like protein 1	Q9BZJ0	YTYMEEMLGNVAGAR	Unannotated	Unannotated	Unannotated	Unannotated
KAT14	Cysteine-rich protein 2-binding protein	Q9H8E8	LQLLSQIR	Unannotated	Unannotated	Unannotated	Unannotated
CEP170	Centrosomal protein of 170 kDa	Q5SW79	SSGSLGHRPSQEMDK	Unannotated	Unannotated	Unannotated	Unannotated
RAI14	Ankycorbin	Q9P0K7	ISNLKEHLASK	Unannotated	Unannotated	Unannotated	Unannotated
MIA3	Transport and Golgi organization protein 1 homolog	Q5JRA6	VLDKVFR	Unannotated	Unannotated	Unannotated	Unannotated
RNF213	E3 ubiquitin-protein ligase RNF213	Q63HN8	ILANVTEDAKR	Unannotated	Unannotated	Unannotated	Unannotated
UBR2	E3 ubiquitin-protein ligase UBR2	Q8IWV8	AMVLAAFVQR	Unannotated	Unannotated	Unannotated	Unannotated
HDHD3	Haloacid dehalogenase-like hydrolase domain-containing protein 3	Q9BSH5	LLTWDVKDTLLR	Unannotated	Unannotated	Unannotated	Unannotated
BZW1	eIF5-mimic protein 2	Q7L1Q6	DINAVAASLRK	Unannotated	Unannotated	Unannotated	Unannotated
EPS8	Epidermal growth factor receptor kinase substrate 8	Q12929	AALEDSSGSSELQEIMRR	Unannotated	Unannotated	Unannotated	Unannotated
SYMPK	Symplekin	Q92797	RSVASQFFTQEEGPGIDGMTTSER	Unannotated	Unannotated	Unannotated	Unannotated
PCNT	Pericentrin	O95613	LLADQER	Unannotated	Unannotated	Unannotated	Unannotated
EML4	Echinoderm microtubule-associated protein-like 4	Q9HC35	VIAVADDFCK	Unannotated	Unannotated	Unannotated	Unannotated
CUL9	Cullin-9	Q8IWT3	ADCLSTGMELLR	Unannotated	Unannotated	Unannotated	Unannotated
EIF3E	Eukaryotic translation initiation factor 3 subunit E	P60228	YLTTAVITNK	Unannotated	Unannotated	Unannotated	Unannotated
TOMM34	Mitochondrial import receptor subunit TOM34	Q15785	DCTSALALVPFSIKPLLR	Unannotated	Unannotated	Unannotated	Unannotated
SYNE2	Nesprin-2	Q8WXH0	ILPSLLQNR	Unannotated	Unannotated	Unannotated	Unannotated
CAMK2G	Calcium/calmodulin-dependent protein kinase type II subunit gamma	Q13555	GAILTTMLVSR	Unannotated	Unannotated	Unannotated	Unannotated
ACACA	Acetyl-CoA carboxylase 1	Q13085	IHNANPELTDGQIQAMLR	Unannotated	Unannotated	Unannotated	Unannotated
MCCC2	Methylcrotonoyl-CoA carboxylase beta chain	Q9HCC0	ALVNQLHERVEHIK	Unannotated	Unannotated	Unannotated	Unannotated
HUWE1	E3 ubiquitin-protein ligase HUWE1	Q7Z6Z7	VCDLIMTAIKR	Unannotated	Unannotated	Unannotated	Unannotated
OSBP2	Oxysterol-binding protein 2	Q969R2	DFLELAEIHSR	Unannotated	Unannotated	Unannotated	Unannotated
PLEC	Plectin	Q15149	LSYTQLLRR	Unannotated	Unannotated	Unannotated	Unannotated
RPTOR	Regulatory-associated protein of mTOR	Q8N122	MPESVNVLQIVK	Unannotated	Unannotated	Unannotated	Unannotated
PAFAH1B2	Platelet-activating factor acetylhydrolase IB subunit alpha2	P68402	SQGDSNPAAIPHAAEDIQGDDRWMSQHNR	Unannotated	Unannotated	Unannotated	Unannotated
EIF3M	Eukaryotic translation initiation factor 3 subunit M	Q7L2H7	ALKDPNAFLFDHLLTLKPVK	Unannotated	Unannotated	Unannotated	Unannotated
WASHC2A	WASH complex subunit 2A	Q641Q2	EVDLIPK	Unannotated	Unannotated	Unannotated	Unannotated
IRS1	Insulin receptor substrate 1	P35568	LGPAPPGAASICRPTR	Unannotated	Unannotated	Unannotated	Unannotated
CLIP1	CAP-Gly domain-containing linker protein 1	P30622	LLDLDALRK	Unannotated	Unannotated	Unannotated	Unannotated
GALK1	Galactokinase	P51570	HVVGEIR	Unannotated	Unannotated	Unannotated	Unannotated
PDS5A	Sister chromatid cohesion protein PDS5 homolog A	Q29RF7	IAYPPGVK	Unannotated	Unannotated	Unannotated	Unannotated
ITCH	E3 ubiquitin-protein ligase Itchy homolog	Q96J02	AKVQYFR	Unannotated	Unannotated	Unannotated	Unannotated
DHX35	Probable ATP-dependent RNA helicase DHX35	Q9H5Z1	ALGIDNVLR	Unannotated	Unannotated	Unannotated	Unannotated
WAPL	Wings apart-like protein homolog	Q7Z5K2	VIEYLEHC	Unannotated	Unannotated	Unannotated	Unannotated
FOCAD	Focadhesin	Q5VW36	SYSGENTASAIAR	Unannotated	Unannotated	Unannotated	Unannotated
PFKM	ATP-dependent 6-phosphofructokinase	P08237	LPLMECVQVTK	Unannotated	Unannotated	Unannotated	Unannotated
CRACDL	CRACD-like protein	Q6NV74	SFLITPVKPAVDRK	Unannotated	Unannotated	Unannotated	Unannotated
RTF2	Replication termination factor 2	Q9BY42	SKEESAHWVTHTSYCF	Unannotated	Unannotated	Unannotated	Unannotated
ATXN10	Ataxin-10	Q9UBB4	VTLLDLMIAK	Unannotated	Unannotated	Unannotated	Unannotated
MCCC1	Methylcrotonoyl-CoA carboxylase subunit alpha	Q96RQ3	AMTDTFTLQAHDQFSPFSSSSGR	Unannotated	Unannotated	Unannotated	Unannotated
UBXN4	UBX domain-containing protein 4	Q92575	MLWFQGAIPAAIATAK	Unannotated	Unannotated	Unannotated	Unannotated
EXOC7	Exocyst complex component 7	Q9UPT5	LENSIIPVHK	Unannotated	Unannotated	Unannotated	Unannotated
DIP2B	Disco-interacting protein 2 homolog B	Q9P265	TPLGGIHISQTK	Unannotated	Unannotated	Unannotated	Unannotated
ERCC2	General transcription and DNA repair factor IIH helicase subunit XPD	P18074	CQGNLETLQK	Unannotated	Unannotated	Unannotated	Unannotated
PRPF8	Pre-mRNA-processing-splicing factor 8	Q6P2Q9	VWAEYALK	Unannotated	Unannotated	Unannotated	Unannotated
ACTN1	Alpha-actinin-1	P12814	GISQEQMNEFR	Unannotated	Unannotated	Unannotated	Unannotated
DDX1	ATP-dependent RNA helicase DDX1	Q92499	IMHFPTWVDLK	Unannotated	Unannotated	Unannotated	Unannotated
UBR4	E3 ubiquitin-protein ligase UBR4	Q5T4S7	ALATNPALR	Unannotated	Unannotated	Unannotated	Unannotated
PARN	Poly(A)-specific ribonuclease PARN	O95453	LIEPFFNK	Unannotated	Unannotated	Unannotated	Unannotated
MVK	Mevalonate kinase	Q03426	SPALQILLTNTKVPR	Unannotated	Unannotated	Unannotated	Unannotated
PLEKHG4B	Pleckstrin homology domain-containing family G member 4B	Q96PX9	HGNDLLAMDAIR	Unannotated	Unannotated	Unannotated	Unannotated
WAPL	Wings apart-like protein homolog	Q7Z5K2	RPNFKPDIQEIPK	Unannotated	Unannotated	Unannotated	Unannotated
PRKDC	DNA-dependent protein kinase catalytic subunit	P78527	EQQHVMEELFQSSFR	Unannotated	Unannotated	Unannotated	Unannotated
RAP1GDS1	Rap1 GTPase-GDP dissociation stimulator 1	P52306	MDNLSDTLKK	Unannotated	Unannotated	Unannotated	Unannotated
GCN1	Stalled ribosome sensor GCN1	Q92616	HHIETGGGQLPAK	Unannotated	Unannotated	Unannotated	Unannotated
GCN1	Stalled ribosome sensor GCN1	Q92616	CLQNPSSDIR	Unannotated	Unannotated	Unannotated	Unannotated
PRKDC	DNA-dependent protein kinase catalytic subunit	P78527	EMKPVIFLDVFLPR	Unannotated	Unannotated	Unannotated	Unannotated
LARS2	Leucine--tRNA ligase	Q15031	LWTLTTR	Unannotated	Unannotated	Unannotated	Unannotated
SCYL1	N-terminal kinase-like protein	Q96KG9	IIPVVVK	Unannotated	Unannotated	Unannotated	Unannotated
PPP2R1A	Serine/threonine-protein phosphatase 2A 65 kDa regulatory subunit A alpha isoform	P30153	ELVSDANQHVK	Unannotated	Unannotated	Unannotated	Unannotated
AHCYL2	Adenosylhomocysteinase 3	Q96HN2	NGPFKPNYYRY	Unannotated	Unannotated	Unannotated	Unannotated
LTN1	E3 ubiquitin-protein ligase listerin	O94822	VVTCSLLALKR	Unannotated	Unannotated	Unannotated	Unannotated
RNF213	E3 ubiquitin-protein ligase RNF213	Q63HN8	ITVEYLQHIVEQK	Unannotated	Unannotated	Unannotated	Unannotated
WDFY3	WD repeat and FYVE domain-containing protein 3	Q8IZQ1	LFIYLYK	Unannotated	Unannotated	Unannotated	Unannotated
OSBPL8	Oxysterol-binding protein-related protein 8	Q9BZF1	YVLEEAQR	Unannotated	Unannotated	Unannotated	Unannotated
PRKDC	DNA-dependent protein kinase catalytic subunit	P78527	QITQSALLAEAR	Unannotated	Unannotated	Unannotated	Unannotated
MCCC1	Methylcrotonoyl-CoA carboxylase subunit alpha	Q96RQ3	LNISYTR	Unannotated	Unannotated	Unannotated	Unannotated
WDR82	WD repeat-containing protein 82	Q6UXN9	LILISTNGSFIR	Unannotated	Unannotated	Unannotated	Unannotated
UBR1	E3 ubiquitin-protein ligase UBR1	Q8IWV7	TVVQSCGHSLETK	Unannotated	Unannotated	Unannotated	Unannotated
GCN1	Stalled ribosome sensor GCN1	Q92616	ALCDPLEEVR	Unannotated	Unannotated	Unannotated	Unannotated
GATB	Glutamyl-tRNA(Gln) amidotransferase subunit B	O75879	ETLPELPSVTR	Unannotated	Unannotated	Unannotated	Unannotated
OSBPL2	Oxysterol-binding protein-related protein 2	Q9H1P3	TSLPAPMFSR	Unannotated	Unannotated	Unannotated	Unannotated
SMG1	Serine/threonine-protein kinase SMG1	Q96Q15	TAEALNLDAALFELIKR	Unannotated	Unannotated	Unannotated	Unannotated
GCN1	Stalled ribosome sensor GCN1	Q92616	GVTSILPVLR	Unannotated	Unannotated	Unannotated	Unannotated
USP9X	Probable ubiquitin carboxyl-terminal hydrolase FAF-X	Q93008	LAQQISDEASR	Unannotated	Unannotated	Unannotated	Unannotated
HUWE1	E3 ubiquitin-protein ligase HUWE1	Q7Z6Z7	ITPAMAAR	Unannotated	Unannotated	Unannotated	Unannotated
MDN1	Midasin	Q9NU22	TIIYLDR	Unannotated	Unannotated	Unannotated	Unannotated
ITCH	E3 ubiquitin-protein ligase Itchy homolog	Q96J02	SALDNGPQIAYVR	Unannotated	Unannotated	Unannotated	Unannotated
IPO5	Importin-5	O00410	VCDIAAELAR	Unannotated	Unannotated	Unannotated	Unannotated
SYNE2	Nesprin-2	Q8WXH0	SSVLTQVNQLK	Unannotated	Unannotated	Unannotated	Unannotated
JUP	Junction plakoglobin	P14923	AAMIVNQLSKK	Unannotated	Unannotated	Unannotated	Unannotated
NAA35	N-alpha-acetyltransferase 35	Q5VZE5	FAPFNSVMTPPPVHYLQFK	Unannotated	Unannotated	Unannotated	Unannotated
AGR2	Anterior gradient protein 2 homolog	O95994	LYAYEPADTALLLDNMKK	Unannotated	Unannotated	Unannotated	Unannotated
VIRMA	Protein virilizer homolog	Q69YN4	VVTAGSAILQK	Unannotated	Unannotated	Unannotated	Unannotated
RNF213	E3 ubiquitin-protein ligase RNF213	Q63HN8	FFPKPYDDSR	Unannotated	Unannotated	Unannotated	Unannotated
GCN1	Stalled ribosome sensor GCN1	Q92616	QGEEVFQSLSK	Unannotated	Unannotated	Unannotated	Unannotated
PRKDC	DNA-dependent protein kinase catalytic subunit	P78527	GIFTSEIGTK	Unannotated	Unannotated	Unannotated	Unannotated
RELCH	RAB11-binding protein RELCH	Q9P260	LSEENIDSSAGNGVLTK	Unannotated	Unannotated	Unannotated	Unannotated
UQCRC1	Cytochrome b-c1 complex subunit 1	P31930	SGMFWLRF	Unannotated	Unannotated	Unannotated	Unannotated
BCOR	BCL-6 corepressor	Q6W2J9	SSVETTPSVIQHVGQPPATPAK	Unannotated	Unannotated	Unannotated	Unannotated
VIRMA	Protein virilizer homolog	Q69YN4	LLELILLDQTVR	Unannotated	Unannotated	Unannotated	Unannotated
RNF213	E3 ubiquitin-protein ligase RNF213	Q63HN8	LVESISLDENGTR	Unannotated	Unannotated	Unannotated	Unannotated
PRKDC	DNA-dependent protein kinase catalytic subunit	P78527	CGAALAGHQLIR	Unannotated	Unannotated	Unannotated	Unannotated
EIF3E	Eukaryotic translation initiation factor 3 subunit E	P60228	YLTTAVITNKDVR	Unannotated	Unannotated	Unannotated	Unannotated
PRKDC	DNA-dependent protein kinase catalytic subunit	P78527	LSFAVPFR	Unannotated	Unannotated	Unannotated	Unannotated
STARD10	START domain-containing protein 10	Q9Y365	ESVQVPDDQDFR	Unannotated	Unannotated	Unannotated	Unannotated
PHF21A	PHD finger protein 21A	Q96BD5	RVVEQLR	Unannotated	Unannotated	Unannotated	Unannotated
ATP2A3	Sarcoplasmic/endoplasmic reticulum calcium ATPase 3	Q93084	CLALATR	Unannotated	Unannotated	Unannotated	Unannotated
UQCRC1	Cytochrome b-c1 complex subunit 1	P31930	IAEVDASVVR	Unannotated	Unannotated	Unannotated	Unannotated
MCCC1	Methylcrotonoyl-CoA carboxylase subunit alpha	Q96RQ3	EGSIEIDIPVPK	Unannotated	Unannotated	Unannotated	Unannotated
GCN1	Stalled ribosome sensor GCN1	Q92616	VVLPYLVPK	Unannotated	Unannotated	Unannotated	Unannotated
MROH1	Maestro heat-like repeat-containing protein family member 1	Q8NDA8	VPEIVSVLR	Unannotated	Unannotated	Unannotated	Unannotated
MTOR	Serine/threonine-protein kinase mTOR	P42345	YDVLICR	Unannotated	Unannotated	Unannotated	Unannotated
DDX6	Probable ATP-dependent RNA helicase DDX6	P26196	IKTSDVTSTK	Unannotated	Unannotated	Unannotated	Unannotated
VIRMA	Protein virilizer homolog	Q69YN4	LTELLDLYREDR	Unannotated	Unannotated	Unannotated	Unannotated
PRKDC	DNA-dependent protein kinase catalytic subunit	P78527	LQETLSAADR	Unannotated	Unannotated	Unannotated	Unannotated
CAND1	Cullin-associated NEDD8-dissociated protein 1	Q86VP6	GYLISGSSYAR	Unannotated	Unannotated	Unannotated	Unannotated
GLUD1	Glutamate dehydrogenase 1	P00367	MVEGFFDR	Unannotated	Unannotated	Unannotated	Unannotated
IARS1	Isoleucine--tRNA ligase	P41252	FLIQNVLR	Unannotated	Unannotated	Unannotated	Unannotated
LRPPRC	Leucine-rich PPR motif-containing protein	P42704	LVEKGETDLIQK	Unannotated	Unannotated	Unannotated	Unannotated
INTS1	Integrator complex subunit 1	Q8N201	ILVIGLSR	Unannotated	Unannotated	Unannotated	Unannotated
EIF4A1	Eukaryotic initiation factor 4A-I	P60842	ILVKKEELTLEGIR	Unannotated	Unannotated	Unannotated	Unannotated
ECH1	Delta(3	Q13011	TVTFSKL	Unannotated	Unannotated	Unannotated	Unannotated
GLUD1	Glutamate dehydrogenase 1	P00367	GASIVEDKLVEDLR	Unannotated	Unannotated	Unannotated	Unannotated
MCCC1	Methylcrotonoyl-CoA carboxylase subunit alpha	Q96RQ3	ESLCQAALGLILK	Unannotated	Unannotated	Unannotated	Unannotated
USP9X	Probable ubiquitin carboxyl-terminal hydrolase FAF-X	Q93008	LLLTAIGYGHVR	Unannotated	Unannotated	Unannotated	Unannotated
RNF213	E3 ubiquitin-protein ligase RNF213	Q63HN8	KTEDECSFVSLR	Unannotated	Unannotated	Unannotated	Unannotated
RIF1	Telomere-associated protein RIF1	Q5UIP0	EKPGSEVLTLLLK	Unannotated	Unannotated	Unannotated	Unannotated
MDN1	Midasin	Q9NU22	GLSLGFLEK	Unannotated	Unannotated	Unannotated	Unannotated
PTGR3	Prostaglandin reductase 3	Q8N4Q0	FTGLESIFR	Unannotated	Unannotated	Unannotated	Unannotated
NUP205	Nuclear pore complex protein Nup205	Q92621	QCLGLLSR	Unannotated	Unannotated	Unannotated	Unannotated
ATP6V1A	V-type proton ATPase catalytic subunit A	P38606	LIKDDFLQQNGYTPYDR	Unannotated	Unannotated	Unannotated	Unannotated
GCN1	Stalled ribosome sensor GCN1	Q92616	HLGVILPAVMLALK	Unannotated	Unannotated	Unannotated	Unannotated
SET	Protein SET	Q01105	LRQPFFQKR	Unannotated	Unannotated	Unannotated	Unannotated
PFKM	ATP-dependent 6-phosphofructokinase	P08237	LLAHVRPPVSK	Unannotated	Unannotated	Unannotated	Unannotated
SET	Protein SET	Q01105	LRQPFFQK	Unannotated	Unannotated	Unannotated	Unannotated
GCN1	Stalled ribosome sensor GCN1	Q92616	IIIEDLLEATR	Unannotated	Unannotated	Unannotated	Unannotated
GLUD1	Glutamate dehydrogenase 1	P00367	MVEGFFDRGASIVEDKLVEDLR	Unannotated	Unannotated	Unannotated	Unannotated
TTC39A	Tetratricopeptide repeat protein 39A	Q5SRH9	IQAATLQAK	Unannotated	Unannotated	Unannotated	Unannotated
PRKDC	DNA-dependent protein kinase catalytic subunit	P78527	SIGEYDVLR	Unannotated	Unannotated	Unannotated	Unannotated
MCCC1	Methylcrotonoyl-CoA carboxylase subunit alpha	Q96RQ3	ESLCQAALGLILKEK	Unannotated	Unannotated	Unannotated	Unannotated
CSE1L	Exportin-2	P55060	FQSGDFHVINGVLR	Unannotated	Unannotated	Unannotated	Unannotated
CPSF3	Cleavage and polyadenylation specificity factor subunit 3	Q9UKF6	GLIPVFALGR	Unannotated	Unannotated	Unannotated	Unannotated
KIF18A	Kinesin-like protein KIF18A	Q8NI77	SPPSQSVQLNDSLSK	Unannotated	Unannotated	Unannotated	Unannotated
NUP205	Nuclear pore complex protein Nup205	Q92621	LLDIEGLYSK	Unannotated	Unannotated	Unannotated	Unannotated
TBRG4	FAST kinase domain-containing protein 4	Q969Z0	LSFHQTQVSQR	Unannotated	Unannotated	Unannotated	Unannotated
EIF4A1	Eukaryotic initiation factor 4A-I	P60842	KEELTLEGIR	Unannotated	Unannotated	Unannotated	Unannotated
GCN1	Stalled ribosome sensor GCN1	Q92616	SLVSGLIR	Unannotated	Unannotated	Unannotated	Unannotated
GCN1	Stalled ribosome sensor GCN1	Q92616	AYSDQAIVNLLK	Unannotated	Unannotated	Unannotated	Unannotated
NUP205	Nuclear pore complex protein Nup205	Q92621	SRYSFIQALVR	Unannotated	Unannotated	Unannotated	Unannotated
NLRP2	NACHT	Q9NX02	DLAAVLVVSR	Unannotated	Unannotated	Unannotated	Unannotated
SEC31A	Protein transport protein Sec31A	O94979	LVTFENVR	Unannotated	Unannotated	Unannotated	Unannotated
FRA10AC1	Protein FRA10AC1	Q70Z53	FVNDYILYYGGKK	Unannotated	Unannotated	Unannotated	Unannotated
EXOC4	Exocyst complex component 4	Q96A65	LIPPQDILR	Unannotated	Unannotated	Unannotated	Unannotated
RNF213	E3 ubiquitin-protein ligase RNF213	Q63HN8	FLQGKPR	Unannotated	Unannotated	Unannotated	Unannotated
KIF5B	Kinesin-1 heavy chain	P33176	ADLAECNIK	Unannotated	Unannotated	Unannotated	Unannotated
ALDH18A1	Delta-1-pyrroline-5-carboxylate synthase	P54886	FASYLTFSPSEVK	Unannotated	Unannotated	Unannotated	Unannotated
SF3B1	Splicing factor 3B subunit 1	O75533	EIISNLAK	Unannotated	Unannotated	Unannotated	Unannotated
ACTN4	Alpha-actinin-4	O43707	GISQEQMQEFR	Unannotated	Unannotated	Unannotated	Unannotated
HDHD3	Haloacid dehalogenase-like hydrolase domain-containing protein 3	Q9BSH5	AHGLEVEPSALEQGFR	Unannotated	Unannotated	Unannotated	Unannotated
DDX6	Probable ATP-dependent RNA helicase DDX6	P26196	SIEEQLGTEIKPIPSNIDK	Unannotated	Unannotated	Unannotated	Unannotated
BAX	Apoptosis regulator BAX	Q07812	TGALLLQGFIQDR	Unannotated	Unannotated	Unannotated	Unannotated
EIF4A1	Eukaryotic initiation factor 4A-I	P60842	FMRDPIR	Unannotated	Unannotated	Unannotated	Unannotated
MKI67	Proliferation marker protein Ki-67	P46013	KADVEEEFLAFR	KI67R	Repeat	KI67R	Unannotated
SART1	U4/U6	O43290	LGLKPLEVNAIK	HIND	Motif	HIND	Unannotated
CLUH	Clustered mitochondria protein homolog	O75153	SVEGLQEGSVLR	CLU_N	Family	CLU_N	Unannotated
OSBPL10	Oxysterol-binding protein-related protein 10	Q9BXB5	LLEHGEEYVFTLPSAYAR	Oxysterol_BP	Family	Oxysterol_BP	Unannotated
CLUH	Clustered mitochondria protein homolog	O75153	VVEEPYTVR	CLU_N	Family	CLU_N	Unannotated
OSBPL10	Oxysterol-binding protein-related protein 10	Q9BXB5	HNPTNTIVCK	Oxysterol_BP	Family	Oxysterol_BP	Unannotated
HSPD1	60 kDa heat shock protein	P10809	GQKCEFQDAYVLLSEKK	Cpn60_TCP1	Family	Cpn60_TCP1	Unannotated
SUPT6H	Transcription elongation factor SPT6	Q7KZ85	TSFDDRLEDDDFDLIEENLGVK	SPT6_acidic	Family	SPT6_acidic	Unannotated
OSBPL10	Oxysterol-binding protein-related protein 10	Q9BXB5	KPYNPIIGETFHCSWEVPKDR	Oxysterol_BP	Family	Oxysterol_BP	Unannotated
TOP2B	DNA topoisomerase 2-beta	Q02880	KTSFDQDSDVDIFPSDFPTEPPSLPR	DTHCT	Family	DTHCT	Unannotated
PBDC1	Protein PBDC1	Q9BVG4	LISSVDPQFLK	Polysacc_synt_4	Family	Polysacc_synt_4	Unannotated
LUC7L3	Luc7-like protein 3	O95232	WDHESVCKYYLCGFCPAELFTNTR	LUC7	Family	LUC7	Unannotated
CCT4	T-complex protein 1 subunit delta	P50991	SIHDALCVIRCLVK	Cpn60_TCP1	Family	Cpn60_TCP1	Unannotated
NAP1L1	Nucleosome assembly protein 1-like 1	P55209	FEIINAIYEPTEEECEWKPDEEDEISEELKEK	NAP	Family	NAP	Unannotated
XRCC6	X-ray repair cross-complementing protein 6	P12956	FTYRSDSFENPVLQQHFR	Ku_C	Family	Ku_C	Unannotated
DNAH2	Dynein axonemal heavy chain 2	Q9P225	KAVDLYMLFNSELALVNR	DHC_N1	Family	DHC_N1	Unannotated
TSPYL2	Testis-specific Y-encoded-like protein 2	Q9H2G4	DLIIQHIPGFWVK	NAP	Family	NAP	Unannotated
DMXL2	DmX-like protein 2	Q8TDJ6	VINLSQYGPAYFGQEHAR	Rav1p_C	Family	Rav1p_C	Unannotated
FLYWCH2	FLYWCH family member 2	Q96CP2	LVLLTASKDSTK	FLYWCH_N	Family	FLYWCH_N	Unannotated
PAXBP1	PAX3- and PAX7-binding protein 1	Q9Y5B6	LTVIAENMWDPFSTTQTSR	GCFC	Family	GCFC	Unannotated
CDC5L	Cell division cycle 5-like protein	Q99459	EMITMLHYDLLHHPYEPSGNKK	Myb_Cef	Family	Myb_Cef	Unannotated
DYNC1H1	Cytoplasmic dynein 1 heavy chain 1	Q14204	INEWLTLVEKEMR	DHC_N2	Family	DHC_N2	Unannotated
ATP6V1A	V-type proton ATPase catalytic subunit A	P38606	FTMVQVWPVR	ATP-synt_ab_Xtn	Family	ATP-synt_ab_Xtn	Unannotated
FASTKD1	FAST kinase domain-containing protein 1	Q53R41	MLAEVLGGINCVK	FAST_2	Family	FAST_2	Unannotated
MID1IP1	Mid1-interacting protein 1	Q9NPA3	GLHTVLSK	Spot_14	Family	Spot_14	Unannotated
PRKDC	DNA-dependent protein kinase catalytic subunit	P78527	CLMDQATDPNILGR	FATC	Family	FATC	Unannotated
OSBPL8	Oxysterol-binding protein-related protein 8	Q9BZF1	DGFCLSGSILAK	Oxysterol_BP	Family	Oxysterol_BP	Unannotated
HSP90B1	Endoplasmin	P14625	GLFDEYGSKK	HSP90	Family	HSP90	Unannotated
OSBP	Oxysterol-binding protein 1	P22059	TRIPYKPNYSLNLWSIMK	Oxysterol_BP	Family	Oxysterol_BP	Unannotated
OSBP	Oxysterol-binding protein 1	P22059	ATEDGTPYDPYKALWFER	Oxysterol_BP	Family	Oxysterol_BP	Unannotated
OSBP	Oxysterol-binding protein 1	P22059	ELTHIYRGEYWECK	Oxysterol_BP	Family	Oxysterol_BP	Unannotated
OSBPL2	Oxysterol-binding protein-related protein 2	Q9H1P3	ITMPIAFNEPLSFLQR	Oxysterol_BP	Family	Oxysterol_BP	Unannotated
HUWE1	E3 ubiquitin-protein ligase HUWE1	Q7Z6Z7	YICQKPSIQK	DUF913	Family	DUF913	Unannotated
OSBP	Oxysterol-binding protein 1	P22059	LMENGRWDEANAEK	Oxysterol_BP	Family	Oxysterol_BP	Unannotated
IQGAP3	Ras GTPase-activating-like protein IQGAP3	Q86VI3	GVLVEIEDLPASHFR	RasGAP_C	Family	RasGAP_C	Unannotated
OSBP	Oxysterol-binding protein 1	P22059	KVTTTVHNIIVGK	Oxysterol_BP	Family	Oxysterol_BP	Unannotated
OSBP	Oxysterol-binding protein 1	P22059	FVPYSYFSR	Oxysterol_BP	Family	Oxysterol_BP	Unannotated
WASHC5	WASH complex subunit 5	Q12768	LASALDLPLLR	Strumpellin	Family	Strumpellin	Unannotated
OSBP2	Oxysterol-binding protein 2	Q969R2	IPMPVNFNEPLSMLQR	Oxysterol_BP	Family	Oxysterol_BP	Unannotated
QRSL1	Glutamyl-tRNA(Gln) amidotransferase subunit A	Q9H0R6	QGQITPTELCQK	Amidase	Family	Amidase	Unannotated
OSBP	Oxysterol-binding protein 1	P22059	VQPVIGENGGDAR	Oxysterol_BP	Family	Oxysterol_BP	Unannotated
OSBPL2	Oxysterol-binding protein-related protein 2	Q9H1P3	ASCQPQPLER	Oxysterol_BP	Family	Oxysterol_BP	Unannotated
OSBPL2	Oxysterol-binding protein-related protein 2	Q9H1P3	ITEYMEHVYLIHR	Oxysterol_BP	Family	Oxysterol_BP	Unannotated
OSBP	Oxysterol-binding protein 1	P22059	SLCEQVSHHPPAAAHHAESK	Oxysterol_BP	Family	Oxysterol_BP	Unannotated
OSBP	Oxysterol-binding protein 1	P22059	ATEDGTPYDPYK	Oxysterol_BP	Family	Oxysterol_BP	Unannotated
OSBP	Oxysterol-binding protein 1	P22059	ELSKIPMPVNFNEPLSMLQR	Oxysterol_BP	Family	Oxysterol_BP	Unannotated
OSBP	Oxysterol-binding protein 1	P22059	TSKPFNPLLGETFELDRLEENGYR	Oxysterol_BP	Family	Oxysterol_BP	Unannotated
HUWE1	E3 ubiquitin-protein ligase HUWE1	Q7Z6Z7	TDATTAIIK	DUF913	Family	DUF913	Unannotated
OSBPL2	Oxysterol-binding protein-related protein 2	Q9H1P3	LFMIYGK	Oxysterol_BP	Family	Oxysterol_BP	Unannotated
OSBPL8	Oxysterol-binding protein-related protein 8	Q9BZF1	VVLPTFILEPR	Oxysterol_BP	Family	Oxysterol_BP	Unannotated
UBE4A	Ubiquitin conjugation factor E4 A	Q14139	INKPGNMIMAFSNLAER	Ufd2P_core	Family	Ufd2P_core	Unannotated
PPP4R3A	Serine/threonine-protein phosphatase 4 regulatory subunit 3A	Q6IN85	FKEVIPISDPELK	PP4R3	Family	PP4R3	Unannotated
ADPRS	ADP-ribosylhydrolase ARH3	Q9NX46	GSYGNGGAMR	ADP_ribosyl_GH	Family	ADP_ribosyl_GH	Unannotated
CCT2	T-complex protein 1 subunit beta	P78371	FRQDLMNIAGTTLSSK	Cpn60_TCP1	Family	Cpn60_TCP1	Unannotated
SET	Protein SET	Q01105	EFHLNESGDPSSK	NAP	Family	NAP	Unannotated
QRSL1	Glutamyl-tRNA(Gln) amidotransferase subunit A	Q9H0R6	FDGLQYGHR	Amidase	Family	Amidase	Unannotated
GATC	Glutamyl-tRNA(Gln) amidotransferase subunit C	O43716	SDNVVEGNCADELLQNSHR	Glu-tRNAGln	Family	Glu-tRNAGln	Unannotated
OSBP	Oxysterol-binding protein 1	P22059	IPYKPNYSLNLWSIMK	Oxysterol_BP	Family	Oxysterol_BP	Unannotated
OSBP	Oxysterol-binding protein 1	P22059	LWIDQSGEIDIVNHK	Oxysterol_BP	Family	Oxysterol_BP	Unannotated
OSBPL2	Oxysterol-binding protein-related protein 2	Q9H1P3	CVGLELSK	Oxysterol_BP	Family	Oxysterol_BP	Unannotated
QRSL1	Glutamyl-tRNA(Gln) amidotransferase subunit A	Q9H0R6	NPAAHCGLVGFKPSYGLVSR	Amidase	Family	Amidase	Unannotated
OSBP	Oxysterol-binding protein 1	P22059	LTEDLEYHELLDR	Oxysterol_BP	Family	Oxysterol_BP	Unannotated
PSME2	Proteasome activator complex subunit 2	Q9UL46	CGFLPGNEK	PA28_beta	Family	PA28_beta	Unannotated
OSBP	Oxysterol-binding protein 1	P22059	KVTGEVTDPSGK	Oxysterol_BP	Family	Oxysterol_BP	Unannotated
KNTC1	Kinetochore-associated protein 1	P50748	TLVNNLR	Rod_C	Family	Rod_C	Unannotated
C1D	Nuclear nucleic acid-binding protein C1D	Q13901	EHPVKQELER	Sas10_Utp3	Family	Sas10_Utp3	Unannotated
INTS5	Integrator complex subunit 5	Q6P9B9	LVPFLDALK	INTS5_C	Family	INTS5_C	Unannotated
OSBPL8	Oxysterol-binding protein-related protein 8	Q9BZF1	SLIWTLLK	Oxysterol_BP	Family	Oxysterol_BP	Unannotated
THOC7	THO complex subunit 7 homolog	Q6I9Y2	WCNSGSQEEGYSQYQR	THOC7	Family	THOC7	Unannotated
ATP6V1A	V-type proton ATPase catalytic subunit A	P38606	QVRPVTEKLPANHPLLTGQR	ATP-synt_ab_Xtn	Family	ATP-synt_ab_Xtn	Unannotated
OSBPL1A	Oxysterol-binding protein-related protein 1	Q9BXW6	ITMPVIFNEPLSFLQR	Oxysterol_BP	Family	Oxysterol_BP	Unannotated
HSP90AA1	Heat shock protein HSP 90-alpha	P07900	KTKFENLCK	HSP90	Family	HSP90	Unannotated
MACROH2A1	Core histone macro-H2A	O75367	GVTIASGGVLPNIHPELLAK	Histone_H2A_C	Family	Histone_H2A_C	Unannotated
KNTC1	Kinetochore-associated protein 1	P50748	IQNSSGTDYPDIHAAAK	Rod_C	Family	Rod_C	Unannotated
ACACA	Acetyl-CoA carboxylase 1	Q13085	ATLVDHGIR	ACC_central	Family	ACC_central	Unannotated
ACACA	Acetyl-CoA carboxylase 1	Q13085	TFEDFVR	ACC_central	Family	ACC_central	Unannotated
ORC3	Origin recognition complex subunit 3	Q9UBD5	ENVVNFIDCLVR	ORC3_ins	Family	ORC3_ins	Unannotated
SET	Protein SET	Q01105	VEVTEFEDIK	NAP	Family	NAP	Unannotated
OSBPL11	Oxysterol-binding protein-related protein 11	Q9BXB4	SVILHLLSQLK	Oxysterol_BP	Family	Oxysterol_BP	Unannotated
HUWE1	E3 ubiquitin-protein ligase HUWE1	Q7Z6Z7	KAIQDPAFSDGIR	DUF913	Family	DUF913	Unannotated
PTPA	Serine/threonine-protein phosphatase 2A activator	Q15257	LVALLNTLDR	PTPA	Family	PTPA	Unannotated
ATP6V1A	V-type proton ATPase catalytic subunit A	P38606	VGSHITGGDIYGIVSENSLIK	ATP-synt_ab_Xtn	Family	ATP-synt_ab_Xtn	Unannotated
UBE4A	Ubiquitin conjugation factor E4 A	Q14139	SYSPTLFAQTVR	Ufd2P_core	Family	Ufd2P_core	Unannotated
SERPINH1	Serpin H1	P50454	HLAGLGLTEAIDKNK	Serpin	Domain	Serpin	Unannotated
SERPINH1	Serpin H1	P50454	DTQSGSLLFIGR	Serpin	Domain	Serpin	Unannotated
SERPINH1	Serpin H1	P50454	TGLYNYYDDEKEK	Serpin	Domain	Serpin	Unannotated
SERPINH1	Serpin H1	P50454	LSSLIILMPHHVEPLER	Serpin	Domain	Serpin	Unannotated
SERPINH1	Serpin H1	P50454	KAVAISLPK	Serpin	Domain	Serpin	Unannotated
SERPINH1	Serpin H1	P50454	TGLYNYYDDEKEKLQIVEMPLAHK	Serpin	Domain	Serpin	Unannotated
SERPINH1	Serpin H1	P50454	GVVEVTHDLQK	Serpin	Domain	Serpin	Unannotated
SERPINH1	Serpin H1	P50454	AVAISLPK	Serpin	Domain	Serpin	Unannotated
SERPINH1	Serpin H1	P50454	HLAGLGLTEAIDKNKADLSR	Serpin	Domain	Serpin	Unannotated
PDCD2L	Programmed cell death protein 2-like	Q9BRP1	IAACQEQILR	PDCD2_C	Domain	PDCD2_C	Unannotated
BRD7	Bromodomain-containing protein 7	Q9NPI1	NNDYQSIEELKDNFK	Bromodomain	Domain	Bromodomain	Unannotated
SERPINH1	Serpin H1	P50454	LSSLIILMPHHVEPLERLEK	Serpin	Domain	Serpin	Unannotated
BRD4	Bromodomain-containing protein 4	O60885	LMFSNCYK	Bromodomain	Domain	Bromodomain	Unannotated
SEPHS2	Selenide	Q99611	NEVSFVIHNLPIIAK	AIRS_C	Domain	AIRS_C	Unannotated
MCM6	DNA replication licensing factor MCM6	Q14566	DFYVAFQDLPTR	MCM_N	Domain	MCM_N	Unannotated
SERPINH1	Serpin H1	P50454	LFYADHPFIFLVR	Serpin	Domain	Serpin	Unannotated
MCM6	DNA replication licensing factor MCM6	Q14566	YLQLAEELIRPER	MCM_N	Domain	MCM_N	Unannotated
RSL1D1	Ribosomal L1 domain-containing protein 1	O76021	SAALPIFSSFVSNWDEATKR	Ribosomal_L1	Domain	Ribosomal_L1	Unannotated
MCM4	DNA replication licensing factor MCM4	P33991	LVIWGTDVNVAACK	MCM_N	Domain	MCM_N	Unannotated
EEF1B2	Elongation factor 1-beta	P24534	SSILLDVKPWDDETDMAKLEECVR	EF1_GNE	Domain	EF1_GNE	Unannotated
MTA1	Metastasis-associated protein MTA1	Q13330	RMNWIDAPDDVFYMATEETR	MTA_R1	Domain	MTA_R1	Unannotated
ANAPC1	Anaphase-promoting complex subunit 1	Q9H1A4	HHPNALNLQLR	Apc1_N	Domain	Apc1_N	Unannotated
CHD8	Chromodomain-helicase-DNA-binding protein 8	Q9HCK8	RAELEMWLQGHPEFAVDPR	BRK	Domain	BRK	Unannotated
PIK3R2	Phosphatidylinositol 3-kinase regulatory subunit beta	O00459	IAEIHESR	PI3K_P85_iSH2	Domain	PI3K_P85_iSH2	Unannotated
HDGFL2	Hepatoma-derived growth factor-related protein 2	Q7Z4V5	RCLNALEELGTLQVTSQILQK	LEDGF	Domain	LEDGF	Unannotated
DNAJC13	DnaJ homolog subfamily C member 13	O75165	ENINQKPVVLRK	RME-8_N	Domain	RME-8_N	Unannotated
THAP12	52 kDa repressor of the inhibitor of the protein kinase	O43422	VLCILPVMK	Dimer_Tnp_hAT	Domain	Dimer_Tnp_hAT	Unannotated
PGRMC2	Membrane-associated progesterone receptor component 2	O15173	ILLAVNGK	Cyt-b5	Domain	Cyt-b5	Unannotated
PRPF8	Pre-mRNA-processing-splicing factor 8	Q6P2Q9	QILMASGSTTFTK	U5_2-snRNA_bdg	Domain	U5_2-snRNA_bdg	Unannotated
SPTBN2	Spectrin beta chain	O15020	VQAVDAVAAELAAER	Spectrin	Domain	Spectrin	Unannotated
RRM1	Ribonucleoside-diphosphate reductase large subunit	P23921	HPDYAILAAR	ATP-cone	Domain	ATP-cone	Unannotated
ANXA3	Annexin A3	P12429	MLISILTER	Annexin	Domain	Annexin	Unannotated
NME4	Nucleoside diphosphate kinase	O00746	RKPFYPALIR	NDK	Domain	NDK	Unannotated
ATR	Serine/threonine-protein kinase ATR	Q13535	MALNSLMSLMK	UME	Domain	UME	Unannotated
NUP98	Nuclear pore complex protein Nup98-Nup96	P52948	RISEACSLAQQSGDHR	Nup96	Domain	Nup96	Unannotated
PRPF8	Pre-mRNA-processing-splicing factor 8	Q6P2Q9	ELGGLGMLSMGHVLIPQSDLR	U5_2-snRNA_bdg	Domain	U5_2-snRNA_bdg	Unannotated
EPRS1	Bifunctional glutamate/proline--tRNA ligase	P07814	NPEVGLKPVWYSPK	tRNA-synt_1c_C	Domain	tRNA-synt_1c_C	Unannotated
PRPF8	Pre-mRNA-processing-splicing factor 8	Q6P2Q9	KFGFVDAQKEDMPPEHVR	PRO8NT	Domain	PRO8NT	Unannotated
EXOSC1	Exosome complex component CSL4	Q9Y3B2	HGYIFSSLAGCLMK	ECR1_N	Domain	ECR1_N	Unannotated
CPTP	Ceramide-1-phosphate transfer protein	Q5TA50	SLQAMVAHELSNR	GLTP	Domain	GLTP	Unannotated
EIF3E	Eukaryotic translation initiation factor 3 subunit E	P60228	EIYNEKELLQGK	eIF3_N	Domain	eIF3_N	Unannotated
PKM	Pyruvate kinase PKM	P14618	CCSGAIIVLTK	PK_C	Domain	PK_C	Unannotated
CA5B	Carbonic anhydrase 5B	Q9Y2D0	GGPLEHNYR	Carb_anhydrase	Domain	Carb_anhydrase	Unannotated
FRMD4A	FERM domain-containing protein 4A	Q9P2Q2	QRLEELK	CUPID	Domain	CUPID	Unannotated
CHD4	Chromodomain-helicase-DNA-binding protein 4	Q14839	GLRNDKDKPLPPLLAR	CHDII_SANT-like	Domain	CHDII_SANT-like	Unannotated
MLYCD	Malonyl-CoA decarboxylase	O95822	GFGVDHGQVAEQSAGVLHLR	MCD_N	Domain	MCD_N	Unannotated
ATIC	Bifunctional purine biosynthesis protein ATIC	P31939	TLHPAVHAGILAR	MGS	Domain	MGS	Unannotated
CDC37	Hsp90 co-chaperone Cdc37	Q16543	QYMEGFNDELEAFKER	CDC37_M	Domain	CDC37_M	Unannotated
RARS1	Arginine--tRNA ligase	P54136	VEIAGPGFINVHLR	Arg_tRNA_synt_N	Domain	Arg_tRNA_synt_N	Unannotated
SRPRA	Signal recognition particle receptor subunit alpha	P08240	GTLGGMFGMLK	SRP54_N	Domain	SRP54_N	Unannotated
NFU1	NFU1 iron-sulfur cluster scaffold homolog	Q9UMS0	FIPGKPVLETR	Nfu_N	Domain	Nfu_N	Unannotated
EIF3E	Eukaryotic translation initiation factor 3 subunit E	P60228	NLYSDDIPHALR	eIF3_N	Domain	eIF3_N	Unannotated
EIF3E	Eukaryotic translation initiation factor 3 subunit E	P60228	QEYLDTLYR	eIF3_N	Domain	eIF3_N	Unannotated
PKM	Pyruvate kinase PKM	P14618	YRPRAPIIAVTRNPQTAR	PK_C	Domain	PK_C	Unannotated
ACTN4	Alpha-actinin-4	O43707	ICDQWDALGSLTHSRR	Spectrin	Domain	Spectrin	Unannotated
PKM	Pyruvate kinase PKM	P14618	APIIAVTR	PK_C	Domain	PK_C	Unannotated
RARS1	Arginine--tRNA ligase	P54136	EIAENITK	Arg_tRNA_synt_N	Domain	Arg_tRNA_synt_N	Unannotated
PLEC	Plectin	Q15149	RDVQLIR	Spectrin_like	Domain	Spectrin_like	Unannotated
SRPRA	Signal recognition particle receptor subunit alpha	P08240	QALQESLVQILQPQRR	SRP54_N	Domain	SRP54_N	Unannotated
ACTN4	Alpha-actinin-4	O43707	EAILAIHK	Spectrin	Domain	Spectrin	Unannotated
SEC31A	Protein transport protein Sec31A	O94979	LITAVVMK	Sec16_C	Domain	Sec16_C	Unannotated
ACTN4	Alpha-actinin-4	O43707	QLEAIDQLHLEYAKR	Spectrin	Domain	Spectrin	Unannotated
ACTN4	Alpha-actinin-4	O43707	VGWEQLLTTIAR	Spectrin	Domain	Spectrin	Unannotated
ACTN4	Alpha-actinin-4	O43707	CQLEINFNTLQTK	Spectrin	Domain	Spectrin	Unannotated
ACTN4	Alpha-actinin-4	O43707	LASDLLEWIRR	Spectrin	Domain	Spectrin	Unannotated
MON2	Protein MON2 homolog	Q7Z3U7	LFSPNIK	Sec7_N	Domain	Sec7_N	Unannotated
SNX8	Sorting nexin-8	Q9Y5X2	FVNLVAR	PX	Domain	PX	Unannotated
ACTN4	Alpha-actinin-4	O43707	TINEVENQILTR	Spectrin	Domain	Spectrin	Unannotated
ACTN1	Alpha-actinin-1	P12814	LAILGIHNEVSK	Spectrin	Domain	Spectrin	Unannotated
ACTN4	Alpha-actinin-4	O43707	HTNYTMEHIR	Spectrin	Domain	Spectrin	Unannotated
ACTN4	Alpha-actinin-4	O43707	LASDLLEWIR	Spectrin	Domain	Spectrin	Unannotated
ACTN4	Alpha-actinin-4	O43707	TIPWLEDRVPQK	Spectrin	Domain	Spectrin	Unannotated
ACTN4	Alpha-actinin-4	O43707	ISIEMNGTLEDQLSHLK	Spectrin	Domain	Spectrin	Unannotated
ACTN4	Alpha-actinin-4	O43707	LSNRPAFMPSEGK	Spectrin	Domain	Spectrin	Unannotated
HOOK3	Protein Hook homolog 3	Q86VS8	DSLKETIEELR	HOOK	Coiled-coil	HOOK	Unannotated
CCDC93	Coiled-coil domain-containing protein 93	Q567U6	IHATLLEYGRR	CCDC93_CC	Coiled-coil	CCDC93_CC	Unannotated
LMNA	Prelamin-A/C	P02545	KTLDSVAKER	Filament	Coiled-coil	Filament	Unannotated
PPP1R12C	Protein phosphatase 1 regulatory subunit 12C	Q9BZL4	LAQLKVELER	PRKG1_interact	Coiled-coil	PRKG1_interact	Unannotated
URM1	Ubiquitin-related modifier 1	Q9BTM9	VTLPGQEEPWDIR	Urm1	Domain	Ubiquitin	Urm1 (Ubiquitin related modifier)
VPS35	Vacuolar protein sorting-associated protein 35	Q96QK1	NYLLQCTR	Vps35	Repeat	TPR	Vacuolar protein sorting-associated protein 35
VPS35	Vacuolar protein sorting-associated protein 35	Q96QK1	YKQIVLTGILEQVVNCR	Vps35	Repeat	TPR	Vacuolar protein sorting-associated protein 35
VPS35	Vacuolar protein sorting-associated protein 35	Q96QK1	QIVLTGILEQVVNCR	Vps35	Repeat	TPR	Vacuolar protein sorting-associated protein 35
VPS35	Vacuolar protein sorting-associated protein 35	Q96QK1	NIIIALIDR	Vps35	Repeat	TPR	Vacuolar protein sorting-associated protein 35
VPS35	Vacuolar protein sorting-associated protein 35	Q96QK1	SEDPDQQYLILNTAR	Vps35	Repeat	TPR	Vacuolar protein sorting-associated protein 35
VPS35	Vacuolar protein sorting-associated protein 35	Q96QK1	ILVGTNLVR	Vps35	Repeat	TPR	Vacuolar protein sorting-associated protein 35
VPS35	Vacuolar protein sorting-associated protein 35	Q96QK1	LLKIPVDTYNNILTVLK	Vps35	Repeat	TPR	Vacuolar protein sorting-associated protein 35
ATP6V1H	V-type proton ATPase subunit H	Q9UI12	TFINLMTHICK	V-ATPase_H_N	Repeat	TPR	V-ATPase subunit H
VPS52	Vacuolar protein sorting-associated protein 52 homolog	Q8N1B4	GEQRYPFEALFR	Vps52	Family	Vps51	Vps52 / Sac2 family
WWC3	Protein WWC3	Q9ULE0	ESAELPLPAGWEEAR	WW	Domain	WW	WW domain
NEDD4	E3 ubiquitin-protein ligase NEDD4	P46934	TYYVNHESR	WW	Domain	WW	WW domain
PTGR1	Prostaglandin reductase 1	Q14914	MEAFVVYR	ADH_zinc_N	Domain	NADP_Rossmann	Zinc-binding dehydrogenase
PTGR1	Prostaglandin reductase 1	Q14914	LGFDVVFNYK	ADH_zinc_N	Domain	NADP_Rossmann	Zinc-binding dehydrogenase
PTGR1	Prostaglandin reductase 1	Q14914	TGPLPPGPPPEIVIYQELR	ADH_zinc_N	Domain	NADP_Rossmann	Zinc-binding dehydrogenase
CPSF2	Cleavage and polyadenylation specificity factor subunit 2	Q9P2I0	CISTTESIEIK	RMMBL	Motif	RMMBL_DRMBL	Zn-dependent metallo-hydrolase RNA specificity domain

## Sheet: DomainEnrichment
Cluster	Description	GeneRatio	BgRatio	RichFactor	FoldEnrichment	zScore	pvalue	p.adjust	qvalue	geneID	Count	richFactor	neg_log10_p
Stabilized peptides	MCM	21/407	121/104083	0.173554	44.3833	29.9174	1.92847e-28	2.00561e-26	9.74387e-27	P33991@AGIICQLNAR/P33991@GILLQLFGGTRK/P33991@KTTIENIQLPHTLLSR/P33991@SQLLQYVYNLVPR/P33991@AEINILLCGDPGTSK/P33991@LASALAPSIYEHEDIKK/P33991@GILLQLFGGTR/P33991@KPDIYER/P33991@TTIENIQLPHTLLSR/P33991@ELSRKPDIYER/P33991@QLVLQTGALVLSDNGICCIDEFDKMNESTR/P33991@LASALAPSIYEHEDIK/P33991@GSSAVGLTAYVMKDPETR/Q14566@TSILAAANPISGHYDR/Q14566@GDINVCIVGDPSTAK/Q14566@TTGEGTSLRGDINVCIVGDPSTAK/Q14566@DQVAIHEAMEQQTISITK…	21	0.173554	27.7148
Stabilized peptides	ECH_1	17/407	58/104083	0.293103	74.956	35.2992	1.42441e-27	7.40693e-26	3.59851e-26	P30084@LFYSTFATDDRK/P30084@KLFYSTFATDDRK/P30084@EGMTAFVEKR/P30084@ICPVETLVEEAIQCAEK/P30084@EGMTAFVEK/P30084@KLFYSTFATDDR/P30084@ALNALCDGLIDELNQALK/P30084@NNTVGLIQLNRPK/P30084@LFYSTFATDDR/P30084@AFAAGADIK/P30084@LFYSTFATDDRKEGMTAFVEK/P40939@TLQEVTQLSQEAQR/P40939@TVLGTPEVLLGALPGAGGTQRLPK/P40939@ELHSEFSEVMNEIWASDQIR/P40939@TVLGTPEVLLGALPGAGGTQR/P40939@IVEKLEK/P40939@KTVLGTPEVLLGALPGAGGTQRLPK	17	0.293103	26.8464
Stabilized peptides	Serpin	11/407	26/104083	0.423077	108.194	34.2507	2.09216e-20	7.25282e-19	3.52364e-19	P50454@DTQSGSLLFIGR/P50454@LFYADHPFIFLVR/P50454@GVVEVTHDLQK/P50454@HLAGLGLTEAIDKNK/P50454@HLAGLGLTEAIDKNKADLSR/P50454@TGLYNYYDDEKEK/P50454@TGLYNYYDDEKEKLQIVEMPLAHK/P50454@KAVAISLPK/P50454@AVAISLPK/P50454@LSSLIILMPHHVEPLER/P50454@LSSLIILMPHHVEPLERLEK	11	0.423077	19.6794
Stabilized peptides	tRNA-synt_1b	12/407	44/104083	0.272727	69.7451	28.577	2.0468e-19	4.68652e-18	2.27685e-18	P54577@EYTLDVYR/P54577@IFTFAEK/P54577@NSVEVALNK/P54577@APWELLELR/P54577@VDAQFGGIDQR/P54577@YLPALGYSKR/P54577@AMLESIGVPLEK/P54577@LSSVVTQHDSKK/P54577@HVLFPLK/P54577@FIKGTDYQLSK/P54577@HVLFPLKSEFVILRDEK/P54577@IYWGTATTGKPHVAYFVPMSK	12	0.272727	18.6889
Stabilized peptides	3HCDH_N	11/407	31/104083	0.354839	90.7437	31.3116	2.25314e-19	4.68652e-18	2.27685e-18	P40939@DATLTALDR/P40939@DATLTALDRGQQQVFK/P40939@DTSASAVAVGLK/P40939@TILKDATLTALDRGQQQVFK/P40939@TILKDATLTALDR/P40939@TSKDTSASAVAVGLK/P40939@VIGMHYFSPVDK/P40939@MQLLEIITTEKTSK/P40939@VIGMHYFSPVDKMQLLEIITTEK/P40939@ALTSFER/P40939@DTSASAVAVGLKQGK	11	0.354839	18.6472
Stabilized peptides	Sulfotransfer_1	11/407	37/104083	0.297297	76.0285	28.5996	2.22796e-18	3.86179e-17	1.87617e-17	O00204@ICGFLGRPLGK/O00204@NHFTVAQSEAFDR/O00204@SVPIWER/O00204@DVVVSLYHYSK/O00204@IAGQLKDPGTPDQFLR/O00204@EALGSVVAHSTFSAMK/O00204@DPGTPDQFLR/O00204@EGDPSWIR/O00204@GEVQFGSWFDHIK/O00204@DDDIFIITYPK/O00204@AKVIYMGR	11	0.297297	17.6521
Stabilized peptides	MCM_lid	10/407	41/104083	0.243902	62.3737	24.6272	7.53056e-16	1.11883e-14	5.43559e-15	P33991@LSNKVEAIDVEEAKR/P33991@GMVSAYPR/P33991@LSEEASQALIEAYVDMR/P33991@LSNKVEAIDVEEAK/Q14566@ISKESEDFIVEQYK/Q14566@ESEDFIVEQYK/Q14566@MHCCDEVQPK/Q14566@ESEDFIVEQYKHLR/Q14566@RYLLFAR/Q14566@LSEAMAR	10	0.243902	15.1232
Stabilized peptides	tRNA-synt_2d	7/407	15/104083	0.466667	119.342	28.7191	8.31588e-14	1.08106e-12	5.25213e-13	Q9Y285@DQHDTFFLRDPAEALQLPMDYVQR/Q9Y285@LGITQLR/Q9Y285@YGINNIR/Q9Y285@THSQGGYGSQGYK/Q9Y285@YFSIDRVFR/Q9Y285@LAQKKPFTPVK/Q9Y285@FKPAYNPYTEPSMEVFSYHQGLKK	7	0.466667	13.0801
Stabilized peptides	MCM_OB	9/407	52/104083	0.173077	44.2613	19.5509	6.20564e-13	7.17096e-12	3.48387e-12	P33991@IAEPSVCGR/Q14566@IQETQAELPR/Q14566@SLEVILR/Q14566@FLLDTNK/Q14566@YTQPNICR/Q14566@YTQPNICRNPVCANR/Q14566@DVEQQFK/Q14566@VRIQETQAELPR/Q14566@RFLLDTNK	9	0.173077	12.2072
Stabilized peptides	BAAT_C	6/407	21/104083	0.285714	73.0663	20.6939	1.77928e-10	1.85045e-09	8.99002e-10	Q86TX2@SFIPVER/Q86TX2@ASLHALVGSPIIWGGEPR/Q86TX2@GGELCLSMASFLK/Q86TX2@GPGVGLLGISK/Q86TX2@AESTFLFLVGQDDHNWK/Q86TX2@SEFYANEACKR	6	0.285714	9.74976
Stabilized peptides	SCP2	6/407	24/104083	0.25	63.933	19.3193	4.36976e-10	4.13141e-09	2.00716e-09	P22307@MNPQSAFFQGK/P22307@KLEEEGEQFVK/P22307@LEEEGEQFVK/P22307@LEEEGEQFVKK/P22307@GSVLPNSDKKADCTITMADSDFLALMTGK/P22307@IGGIFAFK	6	0.25	9.35954
Stabilized peptides	PhetRS_B1	4/407	6/104083	0.666667	170.488	26.0126	3.43447e-09	2.97654e-08	1.44609e-08	Q9NSD9@DLLFQALGR/Q9NSD9@IDVPANRYDLLCLEGLVR/Q9NSD9@AAGASDVVLYK/Q9NSD9@GLQVFKER	4	0.666667	8.46414
Stabilized peptides	Epimerase	4/407	10/104083	0.4	102.293	20.0704	4.74898e-08	3.79918e-07	1.84576e-07	Q9NRG7@GHEVTLVSR/Q9NRG7@LETTQLLAK/Q9NRG7@WNETFQK/Q9NRG7@ITWDELAASGLPSCDAAVNLAGENILNPLRR	4	0.4	7.3234
Stabilized peptides	3HCDH	4/407	18/104083	0.222222	56.8294	14.842	6.7505e-07	5.01465e-06	2.43627e-06	P40939@FGGGNPELLTQMVSK/P40939@FVDLYGAQK/P40939@HVAEDLGKVFGER/P40939@ILQEGVDPK	4	0.222222	6.17066
Stabilized peptides	Thiolase_C	4/407	23/104083	0.173913	44.4752	13.065	1.92344e-06	1.33359e-05	6.47896e-06	P55084@VGLPPLEK/P55084@FNNWGGSLSLGHPFGATGCR/P55084@DQLLLGPTYATPK/P55084@DFMYVSQDPKDQLLLGPTYATPK	4	0.173913	5.71592
Stabilized peptides	Thiolase_N	5/407	56/104083	0.0892857	22.8332	10.2396	2.89196e-06	1.87977e-05	9.1325e-06	P55084@AALTGLLHR/P55084@LAAAFAVSR/P55084@LAAAFAVSRLEQDEYALR/P55084@LEQDEYALR/P55084@DNGIRPSSLEQMAK	5	0.0892857	5.53881
Stabilized peptides	COesterase	3/407	10/104083	0.3	76.7197	15.0033	6.97865e-06	4.26929e-05	2.07415e-05	O00748@ADHGDELPFVFR/O00748@GANAGVQTFLGIPFAKPPLGPLR/O00748@SFFGGNYIKFTEEEEQLSR	3	0.3	5.15623
Stabilized peptides	CLU_N	2/407	3/104083	0.666667	170.488	18.3934	4.56413e-05	0.000263705	0.000128116	O75153@VVEEPYTVR/O75153@SVEGLQEGSVLR	2	0.666667	4.34064
Stabilized peptides	ADH_zinc_N	3/407	19/104083	0.157895	40.3788	10.7556	5.48962e-05	0.000300484	0.000145984	Q14914@TGPLPPGPPPEIVIYQELR/Q14914@MEAFVVYR/Q14914@LGFDVVFNYK	3	0.157895	4.26046
Stabilized peptides	GSHPx	2/407	4/104083	0.5	127.866	15.8979	9.10459e-05	0.000473439	0.000230011	P36969@ILAFPCNQFGK/P36969@DIDGHMVNLDKYR	2	0.5	4.04074
Stabilized peptides	HEAT_2	3/407	27/104083	0.111111	28.4147	8.92642	0.000161902	0.0008018	0.000389539	Q9BU89@HEAGEALGAIGDPEVLEILK/Q9BU89@AIPMLVDVLQDTRQEPMVR/Q9BU89@AIPMLVDVLQDTR	3	0.111111	3.79075
Stabilized peptides	Bile_Hydr_Trans	2/407	6/104083	0.333333	85.2441	12.9296	0.000226436	0.00107043	0.000520045	Q86TX2@GLAPEQPVTLR/Q86TX2@GALFQAHAR	2	0.333333	3.64505
Stabilized peptides	AAR2	2/407	12/104083	0.166667	42.622	9.03431	0.000980944	0.00443557	0.00215493	Q9Y312@QICAFSDVLPVLSMK/Q9Y312@LPEMKPR	2	0.166667	3.00836
Stabilized peptides	Lipocalin	2/407	20/104083	0.1	25.5732	6.88612	0.0027661	0.0119864	0.00582337	P09455@GWTQWIEGDELHLEMR/P09455@MLVNENFEEYLR	2	0.1	2.55813
Stabilized peptides	SPT6_acidic	1/407	1/104083	1	255.732	15.9603	0.00391034	0.0156414	0.00759904	Q7KZ85@TSFDDRLEDDDFDLIEENLGVK	1	1	2.40779
Stabilized peptides	AIF_C	1/407	1/104083	1	255.732	15.9603	0.00391034	0.0156414	0.00759904	O95831@SATEQSGTGIR	1	1	2.40779
Stabilized peptides	Oxysterol_BP	3/407	84/104083	0.0357143	9.13329	4.67237	0.00447395	0.017233	0.00837231	Q9BXB5@LLEHGEEYVFTLPSAYAR/Q9BXB5@HNPTNTIVCK/Q9BXB5@KPYNPIIGETFHCSWEVPKDR	3	0.0357143	2.34931
Stabilized peptides	3Beta_HSD	1/407	2/104083	0.5	127.866	11.2414	0.00780543	0.0289916	0.014085	Q15738@FFLGDLCSR	1	0.5	2.1076
Stabilized peptides	Neugrin	1/407	3/104083	0.333333	85.2441	9.14244	0.0116853	0.041906	0.0203592	Q9NPE2@LAEGFDVSTDVIRR	1	0.333333	1.93236
Stabilized peptides	PIP5K	2/407	43/104083	0.0465116	11.8945	4.47701	0.0123908	0.0429546	0.0208687	Q8TBX8@VYIGEEEK/Q8TBX8@FLISYDR	2	0.0465116	1.9069
Unstabilized peptides	DNA-PKcs_N	20/727	56/104083	0.357143	51.1314	31.4715	3.65664e-29	7.38641e-27	4.11853e-27	P78527@GYGLFAGPCK/P78527@NVDSNNKELSIAIR/P78527@NLSSNEAISLEEIR/P78527@YAVPSAGLR/P78527@NCISTVVHQGLIR/P78527@IAPYSVEIK/P78527@GLSSLLCNFTK/P78527@YFEGVSPK/P78527@LLSITVR/P78527@VFLALAAK/P78527@AIRPQIDLKR/P78527@FLCIFLEK/P78527@MQLVCCR/P78527@FYGELALK/P78527@AALSALESFLK/P78527@AYVPALQMAFK/P78527@ECREEILK/P78527@KAALSALESFLK/P78527@HSPEDPEKYSCFALFVK/P78527@VFLALAAKGPVLR	20	0.357143	28.4369
Unstabilized peptides	Oxysterol_BP	22/727	84/104083	0.261905	37.4963	28.0648	1.69695e-28	1.71392e-26	9.55653e-27	P22059@TSKPFNPLLGETFELDRLEENGYR/P22059@FVPYSYFSR/P22059@LTEDLEYHELLDR/P22059@VQPVIGENGGDAR/P22059@ATEDGTPYDPYK/P22059@SLCEQVSHHPPAAAHHAESK/P22059@ATEDGTPYDPYKALWFER/P22059@LMENGRWDEANAEK/P22059@KVTTTVHNIIVGK/P22059@KVTGEVTDPSGK/P22059@LWIDQSGEIDIVNHK/P22059@ELTHIYRGEYWECK/P22059@ELSKIPMPVNFNEPLSMLQR/Q969R2@IPMPVNFNEPLSMLQR/Q9BXW6@ITMPVIFNEPLSFLQR/Q9BZF1@VVLPTFILEPR/Q9BZF1@DGFCLSGSILAK/Q9H1P3@ASCQ…	22	0.261905	27.7703
Unstabilized peptides	DNAPKcs_CC1-2	17/727	39/104083	0.435897	62.4065	32.1681	8.22856e-27	5.54056e-25	3.08932e-25	P78527@LAAVVSACK/P78527@LGASLAFNNIYR/P78527@FVPLLPGNR/P78527@CFGTGAAGNR/P78527@QCLPSLDLSCK/P78527@TFPVLLR/P78527@GIAPGDER/P78527@SIELFYK/P78527@LACDVDQVTR/P78527@FNNYVDCMKK/P78527@MVSAVLNGMLDQSFRER/P78527@MSPYKDILETHLR/P78527@WLLAHCGRPQTECR/P78527@DLCNTHLMR/P78527@TSPQEGERYNYSK/P78527@VLEQLIVAHFPMQSR/P78527@LATTILQHWK	17	0.435897	26.0847
Unstabilized peptides	DEAD	30/727	371/104083	0.0808625	11.5769	17.1166	1.71315e-22	8.6514e-21	4.82387e-21	P26196@SGAYLIPLLER/P60842@MFVLDEADEMLSR/P60842@ATQALVLAPTR/P60842@LQMEAPHIIVGTPGR/P60842@GYDVIAQAQSGTGK/P60842@GFKDQIYDIFQK/P60842@AILPCIK/P60842@ELAQQIQK/P60842@VFDMLNRR/P60842@DQIYDIFQK/P60842@ATQALVLAPTRELAQQIQK/P60842@AILPCIKGYDVIAQAQSGTGK/P60842@AEVQKLQMEAPHIIVGTPGR/Q13838@HFILDECDKMLEQLDMRR/Q92499@ELLIIGGVAAR/Q92499@ALIVEPSRELAEQTLNNIK/Q92499@MHNQIPQVTSDGKR/Q92499@ALIVEPSR/Q92499@FLPNAPK/Q9…	30	0.0808625	21.7662
Unstabilized peptides	DNAPKcs_CC3	9/727	16/104083	0.5625	80.5319	26.6828	4.12521e-16	1.66659e-14	9.29258e-15	P78527@ILDVMYSR/P78527@LGNPIVPLNIR/P78527@INQVFHGSCITEGNELTK/P78527@SLGPPQGEEDSVPR/P78527@LCYDAFTENMAGENQLLERR/P78527@LNESTFDTQITK/P78527@LNESTFDTQITKK/P78527@LVINTEEVFRPYAK/P78527@RYNFPVEVEVPMER	9	0.5625	15.3846
Unstabilized peptides	Thioredoxin	14/727	103/104083	0.135922	19.4597	15.7201	2.25825e-14	7.60278e-13	4.23918e-13	P07237@ALAPEYAK/P07237@EADDIVNWLK/P07237@LAKVDATEESDLAQQYGVR/P07237@KSNFAEALAAHK/P07237@LKAEGSEIR/P07237@VDATEESDLAQQYGVR/P07237@TVIDYNGER/P07237@EADDIVNWLKK/P07237@SNFAEALAAHK/P07237@NFEDVAFDEKK/P07237@TLDGFKK/P07237@MDSTANEVEAVK/P07237@AAGKLKAEGSEIR/P07237@VHSFPTLK	14	0.135922	13.6462
Unstabilized peptides	Clathrin	11/727	74/104083	0.148649	21.2817	14.6377	5.02541e-12	1.45019e-10	8.086e-11	Q00610@QLPLVKPYLR/Q00610@SVNESLNNLFITEEDYQALR/Q00610@VKQLPLVKPYLR/Q00610@ALEHFTDLYDIKR/Q00610@LLYNNVSNFGR/Q00610@LASTLVHLGEYQAAVDGAR/Q00610@DPHLACVAYER/Q00610@IVLDNSVFSEHR/Q00610@AYEFAER/Q00610@IAAYLFKGNNR/Q00610@ESNCYDPERVK	11	0.148649	11.2988
Unstabilized peptides	Arginosuc_synth	7/727	18/104083	0.388889	55.6764	19.4568	2.34611e-11	5.26572e-10	2.93607e-10	P00966@NQAPPGLYTK/P00966@IDIVENR/P00966@GQVYILGR/P00966@MPEFYNR/P00966@FELSCYSLAPQIK/P00966@FAELVYTGFWHSPECEFVR/P00966@QHGIPIPVTPK	7	0.388889	10.6297
Unstabilized peptides	G6PD_C	7/727	18/104083	0.388889	55.6764	19.4568	2.34611e-11	5.26572e-10	2.93607e-10	P11413@VQPNEAVYTK/P11413@LILDVFCGSQMHFVR/P11413@NVKLPDAYER/P11413@KPGMFFNPEESELDLTYGNR/P11413@LQFHDVAGDIFHQQCK/P11413@IFTPLLHQIELEKPKPIPYIYGSR/P11413@GPTEADELMKR	7	0.388889	10.6297
Unstabilized peptides	Carboxyl_trans	11/727	93/104083	0.11828	16.9338	12.893	6.50152e-11	1.31331e-09	7.32277e-10	Q13085@IGLAEEIR/Q13085@YLYLTPQDYKR/Q13085@LGGIPVGVVAVETR/Q13085@GGSWVVIDSSINPR/Q13085@LGTPELSTAERK/Q13085@LGTPELSTAER/Q13085@IYVSANSGAR/Q13085@TVELSIPADPANLDSEAK/Q13085@TIQVENSHLILTGAGALNK/Q13085@EEGIGPENLR/Q13085@HMEMYADR	11	0.11828	10.187
Unstabilized peptides	Proteasom_PSMB	7/727	25/104083	0.28	40.087	16.3927	3.39651e-10	6.23723e-09	3.47777e-09	Q16401@ALHSVLQAVPLNELR/Q16401@LEAPLEELR/Q16401@LGPLFSLLNENHR/Q16401@ILTLSQIGR/Q16401@LLQAMEPVHVAR/Q16401@TTLCVSILER/Q16401@EVARLEAPLEELR	7	0.28	9.46897
Unstabilized peptides	CPSase_L_D2	8/727	43/104083	0.186047	26.6359	14.1016	6.37445e-10	1.07303e-08	5.98304e-09	Q96RQ3@IIEEAPAPGIK/Q96RQ3@SEQEFQEQLESARR/Q96RQ3@KSFNDDAMLIEK/Q96RQ3@IIEEAPAPGIKSEVR/Q96RQ3@HNFCFMEMNTR/Q96RQ3@SEQEFQEQLESAR/Q96RQ3@HVEVQVFGDHHGNAVYLFER/Q96RQ3@IGYPVMIK	8	0.186047	9.19556
Unstabilized peptides	tRNA-synt_1c	8/727	47/104083	0.170213	24.369	13.4395	1.34877e-09	2.09578e-08	1.16857e-08	P07814@QFIAAQGSSR/P07814@AALLNQHYQVNFK/P07814@GSQFGQSCCLR/P07814@LNLNNTVLSK/P07814@GMTVEGLK/P07814@AYVDDTPAEQMK/P07814@KGSQFGQSCCLR/P07814@AYVDDTPAEQMKAER	8	0.170213	8.87006
Unstabilized peptides	Vps35	7/727	32/104083	0.21875	31.318	14.386	2.27946e-09	3.28893e-08	1.83385e-08	Q96QK1@ILVGTNLVR/Q96QK1@NYLLQCTR/Q96QK1@QIVLTGILEQVVNCR/Q96QK1@NIIIALIDR/Q96QK1@SEDPDQQYLILNTAR/Q96QK1@LLKIPVDTYNNILTVLK/Q96QK1@YKQIVLTGILEQVVNCR	7	0.21875	8.64217
Unstabilized peptides	FAT	7/727	52/104083	0.134615	19.2726	11.0537	8.02727e-08	1.08101e-06	6.0275e-07	P78527@QGNLSSQVPLKR/P78527@NILAFRDQNILLGTTYR/P78527@SQGCSEQVLTVLK/P78527@VIAGLYQR/P78527@DQNILLGTTYR/P78527@CFFLSKIEEK/Q13535@GDVHQALIVLQK	7	0.134615	7.09543
Unstabilized peptides	GatB_N	5/727	17/104083	0.294118	42.1082	14.2163	9.46652e-08	1.19515e-06	6.66393e-07	O75879@SQTLIDLNR/O75879@LFSGSQVR/O75879@VDANISVHHPGEPLGVR/O75879@LPIAVNGSLIYGVCAGKK/O75879@HYFYADLPAGYQITQQR	5	0.294118	7.02381
Unstabilized peptides	DNAPKcs_CC5	6/727	38/104083	0.157895	22.6054	11.172	2.59661e-07	3.08538e-06	1.72035e-06	P78527@HGDLPDIQIK/P78527@NILEESLCELVAK/P78527@HSSLITPLQAVAQRDPIIAK/P78527@LLALNSLYSPK/P78527@ELLNPVVEFVSHPSTTCR/P78527@VCLDIIYK	6	0.157895	6.58559
Unstabilized peptides	Cse1	5/727	31/104083	0.16129	23.0916	10.3174	2.39726e-06	2.69026e-05	1.50004e-05	P55060@AADEEAFEDNSEEYIRR/P55060@DLEGSDIDTR/P55060@AACDLVR/P55060@HKDAAIYLVTSLASK/P55060@DLEGSDIDTRR	5	0.16129	5.62028
Unstabilized peptides	Spectrin	12/727	381/104083	0.0314961	4.50922	5.75529	1.95875e-05	0.000208246	0.000116114	O15020@VQAVDAVAAELAAER/O43707@VGWEQLLTTIAR/O43707@CQLEINFNTLQTK/O43707@LSNRPAFMPSEGK/O43707@LASDLLEWIRR/O43707@TIPWLEDRVPQK/O43707@ISIEMNGTLEDQLSHLK/O43707@HTNYTMEHIR/O43707@EAILAIHK/O43707@LASDLLEWIR/O43707@ICDQWDALGSLTHSRR/P12814@LAILGIHNEVSK	12	0.0314961	4.70802
Unstabilized peptides	PK_C	3/727	10/104083	0.3	42.9503	11.1264	3.92625e-05	0.000396551	0.00022111	P14618@APIIAVTR/P14618@CCSGAIIVLTK/P14618@YRPRAPIIAVTRNPQTAR	3	0.3	4.40602
Unstabilized peptides	AdoHcyase_NAD	3/727	11/104083	0.272727	39.0458	10.5833	5.37049e-05	0.00051659	0.000288042	O43865@VVLLAEGR/Q96HN2@IVLLAEGR/Q96HN2@SQVDHVIWPDGKR	3	0.272727	4.26999
Unstabilized peptides	START	4/727	33/104083	0.121212	17.3537	7.88022	8.22292e-05	0.000755014	0.000420982	Q9Y365@AVSIQTGYLIQSTGPK/Q9Y365@SCVITYLAQVDPK/Q9Y365@SSQFLAPK/Q9Y365@WDSNVIETFDIAR	4	0.121212	4.08497
Unstabilized peptides	Kinesin	10/727	320/104083	0.03125	4.47399	5.21999	0.000101243	0.000889174	0.000495788	P33176@ILQDSLGGNCR/P33176@LYLVDLAGSEK/P33176@LHDPEGMGIIPR/P33176@FVCSPDEVMDTIDEGKSNR/P33176@FQGEDTVVIASKPYAFDR/P33176@SLSALGNVISALAEGSTYVPYRDSK/P33176@VFQSSTSQEQVYNDCAK/P33176@HVAVTNMNEHSSR/P33176@SHSIFLINVK/Q99661@KEIDVISIPSK	10	0.03125	3.99464
Unstabilized peptides	eIF3_N	3/727	15/104083	0.2	28.6336	8.97658	0.000145039	0.00108844	0.000606893	P60228@NLYSDDIPHALR/P60228@QEYLDTLYR/P60228@EIYNEKELLQGK	3	0.2	3.83852
Unstabilized peptides	PGI	3/727	15/104083	0.2	28.6336	8.97658	0.000145039	0.00108844	0.000606893	P06744@AVLHVALR/P06744@SNTPILVDGK/P06744@MIPCDFLIPVQTQHPIRK	3	0.2	3.83852
Unstabilized peptides	MDD_C	2/727	3/104083	0.666667	95.4452	13.7197	0.000145484	0.00108844	0.000606893	P53602@ASVETSPLLR/P53602@KLTGSTVGMR	2	0.666667	3.83718
Unstabilized peptides	Anticodon_3	2/727	3/104083	0.666667	95.4452	13.7197	0.000145484	0.00108844	0.000606893	P56192@HGNQYIQVNEPWKR/P56192@LENDQIESLR	2	0.666667	3.83718
Unstabilized peptides	Hexokinase_1	3/727	16/104083	0.1875	26.844	8.67061	0.000177582	0.00123695	0.000689702	P19367@ATDCVGHDVVTLLR/P52789@LSDETLLEISKR/P52789@MLPTYVCATPDGTEKGDFLALDLGGTNFR	3	0.1875	3.7506
Unstabilized peptides	DALR_1	3/727	16/104083	0.1875	26.844	8.67061	0.000177582	0.00123695	0.000689702	P54136@GFDILGIKPVQR/Q5T160@LLGITPVCR/Q5T160@FDEVLYK	3	0.1875	3.7506
Unstabilized peptides	DUF913	3/727	19/104083	0.157895	22.6054	7.89909	0.000302519	0.00203696	0.00113577	Q7Z6Z7@TDATTAIIK/Q7Z6Z7@YICQKPSIQK/Q7Z6Z7@KAIQDPAFSDGIR	3	0.157895	3.51925
Unstabilized peptides	ATP-synt_ab_Xtn	2/727	5/104083	0.4	57.2671	10.5523	0.000480457	0.00313072	0.00174563	P38606@VGSHITGGDIYGIVSENSLIK/P38606@FTMVQVWPVR	2	0.4	3.31835
Unstabilized peptides	Hexokinase_2	3/727	25/104083	0.12	17.1801	6.78581	0.000696007	0.00439355	0.00244976	P52789@NVELVEGEEGR/P52789@SASLCAATLAAVLQR/P52789@STIGVDGSVYK	3	0.12	3.15739
Unstabilized peptides	HEAT_2	3/727	27/104083	0.111111	15.9075	6.49743	0.000876	0.00536218	0.00298986	P30153@VLELDNVK/P30153@NLCSDDTPMVR/Q86Y56@SVDDVLSHFAQR	3	0.111111	3.0575
Unstabilized peptides	HAD_2	2/727	8/104083	0.25	35.792	8.25349	0.00132667	0.00788197	0.00439484	Q9BSH5@IFQEALR/Q9BSH5@LEGILGGLGLR	2	0.25	2.87724
Unstabilized peptides	TAL_FSA	2/727	9/104083	0.222222	31.8151	7.75355	0.00169782	0.00979886	0.00546367	P37837@LLGELLQDNAK/P37837@LVPVLSAK	2	0.222222	2.77011
Unstabilized peptides	U5_2-snRNA_bdg	2/727	14/104083	0.142857	20.4525	6.10474	0.0041935	0.0228942	0.0127654	Q6P2Q9@ELGGLGMLSMGHVLIPQSDLR/Q6P2Q9@QILMASGSTTFTK	2	0.142857	2.37742
Unstabilized peptides	LRR_6	2/727	14/104083	0.142857	20.4525	6.10474	0.0041935	0.0228942	0.0127654	Q15048@FNNLGLR/Q9NX02@SSLLCLDLGLNHIGVK	2	0.142857	2.37742
Unstabilized peptides	HATPase_c	3/727	48/104083	0.0625	8.94799	4.61929	0.00464714	0.0247032	0.0137741	P07900@ELISNSSDALDKIR/P07900@ELISNSSDALDK/P08238@YESLTDPSK	3	0.0625	2.33281
Unstabilized peptides	Thioesterase	2/727	15/104083	0.133333	19.089	5.87611	0.00481634	0.0249462	0.0139095	P49327@LSIPTYGLQCTR/P49327@QVQPEGPYR	2	0.133333	2.31728
Unstabilized peptides	Amidase	2/727	16/104083	0.125	17.896	5.66858	0.00547902	0.027669	0.0154278	Q9H0R6@FDGLQYGHR/Q9H0R6@NPAAHCGLVGFKPSYGLVSR	2	0.125	2.2613
Unstabilized peptides	HpcH_HpaI	1/727	1/104083	1	143.168	11.9234	0.00698481	0.0320666	0.0178798	Q8N0X4@VESPEEIQWFADK	1	1	2.15585
Unstabilized peptides	IFT81_CH	1/727	1/104083	1	143.168	11.9234	0.00698481	0.0320666	0.0178798	Q8WYA0@MLSLLGILK	1	1	2.15585
Unstabilized peptides	Urm1	1/727	1/104083	1	143.168	11.9234	0.00698481	0.0320666	0.0178798	Q9BTM9@VTLPGQEEPWDIR	1	1	2.15585
Unstabilized peptides	EVE	1/727	1/104083	1	143.168	11.9234	0.00698481	0.0320666	0.0178798	Q9P016@FIPLAELK	1	1	2.15585
Unstabilized peptides	GST_C	2/727	20/104083	0.1	14.3168	4.9952	0.00851652	0.0366029	0.0204091	P21266@FSWFAGEK/P21266@QFSMFLGK	2	0.1	2.06974
Unstabilized peptides	TTL	2/727	20/104083	0.1	14.3168	4.9952	0.00851652	0.0366029	0.0204091	Q14166@YIESPVLFLR/Q14166@AMYAVDLMLK	2	0.1	2.06974
Unstabilized peptides	MH1	2/727	20/104083	0.1	14.3168	4.9952	0.00851652	0.0366029	0.0204091	Q15796@DEVCVNPYHYQR/Q15796@AIENCEYAFNLKK	2	0.1	2.06974
Unstabilized peptides	PDS5	3/727	65/104083	0.0461538	6.60775	3.79296	0.0107554	0.0452625	0.0252375	Q29RF7@NLPDPGKAQDFVK/Q29RF7@SQLELLISPTCSCK/Q9NTI5@DILLVNDHLLNFVR	3	0.0461538	1.96837
Unstabilized peptides	Ufd2P_core	2/727	24/104083	0.0833333	11.9307	4.49158	0.0121457	0.0490687	0.0273598	Q14139@SYSPTLFAQTVR/Q14139@INKPGNMIMAFSNLAER	2	0.0833333	1.91558
Unstabilized peptides	FERM_M	2/727	24/104083	0.0833333	11.9307	4.49158	0.0121457	0.0490687	0.0273598	P15311@DNAMLEYLK/P15311@GMLKDNAMLEYLK	2	0.0833333	1.91558
