# Supplementary material for: A Two-Dimensional Peptide-Centric Stability Assay Maps Multidimensional Target Landscapes Unveiling 17β-Estradiol (E2)-GPX4 Binding-Induced Ferroptosis
Source: Research Square preprint supplement (doi:10.21203/rs.3.rs-6893001/v1), 2025-07-04
Supplement: Supplementary file 9 [file 5efce12d4ab90db0eed8bee6.xlsx]

## Sheet: parameter description
Supplementary table 8
This file summarizes 17β-Estradiol (E2)-responsive peptides and segments identified by 2D-PELSA analysis of HeLa cell lysates
Tab descriptions
A	E2-responsive peptides	Summary of E2-responsive peptides as measured by 2D-PELSA in HeLa cell lysates
B	E2-responsive segments	Summary of E2-responsive segments as measured by 2D-PELSA in HeLa cell lysates
Experimental Setup	Compound	Concentration [mM]	Data acquisition	Replicate	Cell Line
2D-PELSA experiment, related to Figure S3	E2	100	DIA	Lysate replicate1	HeLa
	E2	100	DIA	Lysate replicate2
	E2	100	DIA	Lysate replicate3
	E2	100	DIA	Lysate replicate4
	E2	100	DIA	Lysate replicate5
	E2	20	DIA	Lysate replicate1
	E2	20	DIA	Lysate replicate2
	E2	20	DIA	Lysate replicate3
	E2	20	DIA	Lysate replicate4
	E2	20	DIA	Lysate replicate5
	E2	2	DIA	Lysate replicate1
	E2	2	DIA	Lysate replicate2
	E2	2	DIA	Lysate replicate3
	E2	2	DIA	Lysate replicate4
	E2	2	DIA	Lysate replicate5
	E2	0.2	DIA	Lysate replicate1
	E2	0.2	DIA	Lysate replicate2
	E2	0.2	DIA	Lysate replicate3
	E2	0.2	DIA	Lysate replicate4
	E2	0.2	DIA	Lysate replicate5
	E2	0.02	DIA	Lysate replicate1
	E2	0.02	DIA	Lysate replicate2
	E2	0.02	DIA	Lysate replicate3
	E2	0.02	DIA	Lysate replicate4
	E2	0.02	DIA	Lysate replicate5
	DMSO	same volume as the added E2 (1% volume of lysates )	DIA	Lysate replicate1
	DMSO	same volume as the added E2 (1% volume of lysates )	DIA	Lysate replicate2
	DMSO	same volume as the added E2 (1% volume of lysates )	DIA	Lysate replicate3
	DMSO	same volume as the added E2 (1% volume of lysates )	DIA	Lysate replicate4
	DMSO	same volume as the added E2 (1% volume of lysates )	DIA	Lysate replicate5
Column descriptions
	Sequence	The amino acid sequence of 2D-PELSA quantified peptide
	Sequence start position	The N-terminal position of the corresponding peptide on the protein sequence
	Log2FC	Log2 intensity fold change of the proxy peptide that was used to represent its parent protein (moderated empirical Bayes t-test)
	-Log10P.Value	-Log10 P.Value of the proxy peptide that was used to represent its parent protein (moderated empirical Bayes t-test)
	domain_description	domain description in pfam database
	IsStabilized	yes/no log2 intensity fold change <0
	Ratio_STU treatment vs Vehice	Relative averaged peptide intensity under ligand treatment to that under vehicle treatment
	EC50 (mM)	The EC50 values calculated by fitting peptide's Ratio and ligand concentrations to a four-parameter log-logistic model.
	R2	The pearson correlation to a sigmoid trend of the ligand dose-response profile
	Lower	The bottom plateaus of the dose-response curve
	Upper	The top plateaus of the dose-response curve

## Sheet: E2-responsive peptides
Gene names	Protein names	Uniprot entry	Sequence	Sequence start position	IsStabilized	Ratio_E2 treatment vs Vehicle						EC50 (uM)	R2	lower	upper	Bayes T-test
						0nM vs. 0nM	20nM vs. 0nM	200nM vs. 0nM	2uM vs. 0nM	20uM vs. 0nM	100uM vs. 0nM					Log2FC_100uM	Log10P.Value_100uM	Log2FC_10uM	Log10P.Value_10uM
ROCK2	Rho-associated protein kinase 2	O75116	YLYMVMEYMPGGDLVNLMSNYDVPEKWAK	164	YES	1	0.486728	0.379702	0.529963	0.557653	0.47779	11396.6	0.9225	1.00009	-0.0300097	-1.09456	2.59774	-1.35118	1.3979
CLUH	Clustered mitochondria protein homolog	O75153	VVEEPYTVR	118	YES	1	0.918489	0.990342	0.934179	0.787511	0.649945	8.92827	0.9558	0.624591	0.969644	-0.579419	4.48777	-0.258948	1.96912
CLUH	Clustered mitochondria protein homolog	O75153	SVEGLQEGSVLR	106	YES	1	1.10865	1.04974	1.10476	0.909125	0.686245	11.2232	0.9381	0.685815	1.06585	-0.621135	4.68703	-0.208497	1.62729
CLUH	Clustered mitochondria protein homolog	O75153	GFYLNQSTAYHFNPKPASPR	257	YES	1	0.987581	0.915734	1.04091	0.727569	0.528751	9.49081	0.959	0.528747	0.986059	-0.875798	2.3512	-0.361251	0.679109
P4HB	Protein disulfide-isomerase	P07237	HNQLPLVIEFTEQTAPK	231	YES	1	0.91528	0.983395	0.712818	0.446293	0.361473	1.37264	0.9844	0.36985	0.974441	-1.7601	3.0765	-1.36369	2.85122
HMGB1	High mobility group protein B1	P09429	HPDASVNFSEFSKKCSER	31	YES	1	1.04581	1.01261	0.830595	0.74031	0.625656	1.59869	0.9678	0.623312	1.03297	-0.718048	2.11434	-0.54035	1.20952
DCK	Deoxycytidine kinase	P27707	STFVNILK	35	YES	1	0.843743	0.869227	0.880933	0.738774	0.474895	11.2634	0.9111	0.474865	0.898484	-0.972544	4.87938	-0.315514	1.76673
DCK	Deoxycytidine kinase	P27707	ISIEGNIAAGK	24	YES	1	0.982675	1.00939	1.00892	0.802126	0.618984	9.83835	0.9964	0.618978	1.00025	-0.866255	3.59963	-0.651123	1.42859
DCK	Deoxycytidine kinase	P27707	GRNEEQGIPLEYLEK	193	YES	1	0.892386	0.918147	0.80455	0.757141	0.232127	98.8072	0.9623	-0.440539	0.923186	-1.62535	2.77704	-1.0971	0.60867
ECHS1	Enoyl-CoA hydratase	P30084	LFYSTFATDDRK	262	YES	1	0.969496	0.988201	0.970819	0.893759	0.508812	62.5578	0.9972	0.22261	0.984708	-0.902811	6.15717	-0.165125	1.88992
ECHS1	Enoyl-CoA hydratase	P30084	KLFYSTFATDDRK	261	YES	1	1.03392	1.02198	1.06574	0.927155	0.525791	17.032	0.9889	0.520298	1.03042	-0.921432	3.62831	-0.132076	0.381046
ECHS1	Enoyl-CoA hydratase	P30084	ICPVETLVEEAIQCAEK	212	YES	1	1.00629	1.02491	1.05299	1.00308	0.671954	28.5843	0.9833	0.661615	1.02103	-0.587001	2.46637	-0.25761	0.69528
ECHS1	Enoyl-CoA hydratase	P30084	GKNNTVGLIQLNRPK	42	YES	1	0.939552	0.973646	0.932595	0.820352	0.618849	36.9127	0.9821	0.439565	0.974762	-0.599703	3.65846	-0.279585	1.7775
ECHS1	Enoyl-CoA hydratase	P30084	NNTVGLIQLNRPK	44	YES	1	0.929072	0.992837	0.991547	0.883753	0.587024	13.8703	0.974	0.586628	0.978383	-0.741972	3.14999	-0.191588	0.712703
ECHS1	Enoyl-CoA hydratase	P30084	ALNALCDGLIDELNQALK	57	YES	1	1.01473	1.00236	0.934147	0.97439	0.717628	31.8031	0.9379	0.703177	0.987949	-0.407341	2.27943	-0.142011	0.418392
ECHS1	Enoyl-CoA hydratase	P30084	KLFYSTFATDDR	261	YES	1	1.04625	0.987116	1.03284	0.967504	0.531789	19.0019	0.9881	0.530102	1.01655	-0.876862	4.46996	-0.112874	0.63575
ECHS1	Enoyl-CoA hydratase	P30084	EGMTAFVEK	274	YES	1	1.0294	0.968239	0.998857	0.899058	0.434947	17.1267	0.9927	0.43135	0.999166	-1.13249	5.59307	-0.230492	1.56704
HADHA	Trifunctional enzyme subunit alpha	P40939	TVLGTPEVLLGALPGAGGTQRLPK	167	YES	1	1.0111	1.0334	1.00261	0.965627	0.653897	15.7596	0.9933	0.653744	1.01178	-0.71675	4.78345	-0.108305	0.875633
HADHA	Trifunctional enzyme subunit alpha	P40939	VIIVVKDGPGFYTTR	535	YES	1	1.08084	0.991443	1.02426	1.00405	0.617281	22.069	0.9631	0.617279	1.02013	-0.71147	4.1811	-0.127514	0.515852
HADHA	Trifunctional enzyme subunit alpha	P40939	MGLVDQLVEPLGPGLKPPEER	215	YES	1	1.00461	0.973154	1.00159	0.920178	0.59083	14.9212	0.9951	0.590483	0.994841	-0.782932	5.42019	-0.106789	0.435384
HADHA	Trifunctional enzyme subunit alpha	P40939	TVLGTPEVLLGALPGAGGTQR	167	YES	1	1.07361	1.08639	1.14255	0.963692	0.649624	14.0215	0.9338	0.648634	1.07566	-0.615959	2.84228	-0.232318	0.664436
HADHA	Trifunctional enzyme subunit alpha	P40939	ILQEGVDPK	561	YES	1	0.928756	0.914596	0.960185	0.804033	0.680191	9.50492	0.9385	0.680097	0.950915	-0.545771	2.72365	-0.140433	0.374509
HADHA	Trifunctional enzyme subunit alpha	P40939	DTSASAVAVGLK	520	YES	1	0.959783	0.998723	0.908194	0.894297	0.685248	85.9652	0.9448	0.426924	0.980603	-0.525383	2.52131	-0.151399	0.520394
HADHA	Trifunctional enzyme subunit alpha	P40939	INSPNSKVNTLSK	54	YES	1	1.03773	0.954485	0.917141	0.803413	0.47821	119.643	0.9857	-0.0945331	1.00485	-1.07179	3.34838	-0.460761	1.3011
HADHA	Trifunctional enzyme subunit alpha	P40939	TLQEVTQLSQEAQR	112	YES	1	0.848666	0.918965	0.897877	0.855996	0.534358	13.4165	0.9075	0.534354	0.916377	-0.9001	3.4751	-0.200153	0.614254
HADHA	Trifunctional enzyme subunit alpha	P40939	TILKDATLTALDRGQQQVFK	387	YES	1	1.04784	0.908521	0.93389	0.886964	0.550286	125.074	0.9306	0.0400304	0.981909	-0.956758	4.61961	-0.273269	1.34508
HADHA	Trifunctional enzyme subunit alpha	P40939	GLYPAPLK	296	YES	1	0.951972	1.04043	0.983306	0.800751	0.539459	12.7742	0.9777	0.518198	0.99667	-0.785167	4.4252	-0.216993	1.16254
CENPF	Centromere protein F	P49454	ESEHHADLLK	2326	YES	1	0.521621	0.413729	0.480661	0.561316	0.432546	551376095133087	0.9377	1	-0.126625	-1.2385	2.27114	-0.770586	1.17849
MCM2	DNA replication licensing factor MCM2	P49736	FVVGSHVR	678	YES	1	1.01448	1.02587	1.07937	0.843594	0.700455	9.29635	0.9648	0.700304	1.02993	-0.504147	2.28177	-0.266815	1.17649
SERPINH1	Serpin H1	P50454	LLTKEQLK	284	YES	1	1.07489	1.06037	1.01157	0.952123	0.743335	12.7253	0.9456	0.743213	1.03672	-0.634878	2.07733	-0.263245	0.762987
AKR1C2	Aldo-keto reductase family 1 member C2	P52895	LLEMILNKPGLK	172	YES	1	0.905976	0.944901	0.868854	0.500474	0.18146	8.48586	0.9917	0.116766	0.954246	-2.36033	9.51956	-1.03269	6.44303
AKR1C2	Aldo-keto reductase family 1 member C2	P52895	SIGVSNFNHR	162	YES	1	1.01358	1.10477	1.00997	0.590182	0.24446	8.73872	0.9884	0.228129	1.03855	-2.00358	7.69834	-0.890584	5.25023
AKR1C2	Aldo-keto reductase family 1 member C2	P52895	LWSNSHRPELVRPALER	85	YES	1	1.05713	1.15739	1.10306	0.538962	0.236481	8.45189	0.9807	0.236223	1.07945	-1.58235	2.58338	-1.54185	0.762188
AKR1C2	Aldo-keto reductase family 1 member C2	P52895	SKALEAVK	32	YES	1	1.26292	1.03983	1.00095	0.367087	0.2078	3.76845	0.9553	0.200865	1.10341	-2.22287	3.93251	-1.41251	2.55784
YARS1	Tyrosine--tRNA ligase	P54577	EYTLDVYR	128	YES	1	0.892935	0.958133	0.930342	0.824404	0.667144	15.6597	0.9185	0.623632	0.950861	-0.568794	4.16634	-0.172702	0.941355
YARS1	Tyrosine--tRNA ligase	P54577	GDAPSPEEKLHLITR	2	YES	1	1.0006	0.991777	1.04134	0.938593	0.710058	13.3675	0.9795	0.709977	1.00843	-0.483604	5.33555	-0.0703765	0.514184
YARS1	Tyrosine--tRNA ligase	P54577	YLPALGYSK	198	YES	1	0.965972	0.986458	1.02367	0.911768	0.730639	12.462	0.9696	0.73053	0.994058	-0.429482	3.19836	-0.138766	1.08342
YARS1	Tyrosine--tRNA ligase	P54577	IFTFAEK	191	YES	1	1.07991	0.981669	1.00987	1.00733	0.745128	16.3496	0.9169	0.745125	1.01786	-0.518165	3.62059	-0.0838671	0.399129
YARS1	Tyrosine--tRNA ligase	P54577	YLPALGYSKR	198	YES	1	0.910456	1.00525	0.978865	0.922843	0.681486	16.7995	0.9228	0.680134	0.973652	-0.500929	5.37888	-0.130803	1.28982
YARS1	Tyrosine--tRNA ligase	P54577	LSSVVTQHDSK	136	YES	1	0.973642	0.978384	1.00987	0.886977	0.695843	11.5528	0.9875	0.69581	0.990475	-0.43314	3.21614	-0.0562591	0.216827
YARS1	Tyrosine--tRNA ligase	P54577	NLQEVLGEEKLK	17	YES	1	0.906252	1.02732	0.954916	0.788328	0.698437	6.20131	0.901	0.693952	0.976922	-0.557651	3.83896	-0.276194	2.37174
YARS1	Tyrosine--tRNA ligase	P54577	LSSVVTQHDSKK	136	YES	1	1.07379	1.04605	1.09693	0.989956	0.738081	16.595	0.9386	0.735672	1.0542	-0.449497	3.74345	-0.0963739	0.572168
YARS1	Tyrosine--tRNA ligase	P54577	VSYYENVIK	94	YES	1	0.961395	1.05644	1.05322	0.838327	0.627282	10.3736	0.9543	0.627265	1.01777	-0.668628	4.29575	-0.248481	1.54233
YARS1	Tyrosine--tRNA ligase	P54577	AMLESIGVPLEK	103	YES	1	0.917754	0.844381	0.844677	0.772613	0.543894	37.8026	0.9248	0.299638	0.971673	-0.866837	3.79607	-0.354393	1.46312
YARS1	Tyrosine--tRNA ligase	P54577	VDAQFGGIDQR	179	YES	1	0.974691	1.06031	1.01763	0.928195	0.718923	13.6465	0.9471	0.718032	1.01319	-0.641822	2.94925	-0.102974	0.413566
YARS1	Tyrosine--tRNA ligase	P54577	TYTAYVDLEKDFAAEVVHPGDLK	288	YES	1	0.881946	1.07257	0.861154	0.745199	0.381896	61.0531	0.9204	-0.050167	0.978934	-1.0805	2.54452	-0.177348	0.406837
YARS1	Tyrosine--tRNA ligase	P54577	NLQEVLGEEK	17	YES	1	0.929221	0.983846	0.95952	0.854882	0.654429	17.6435	0.9669	0.618388	0.97071	-0.528316	3.93055	-0.142226	0.969448
YARS1	Tyrosine--tRNA ligase	P54577	FIKGTDYQLSK	117	YES	1	0.951069	0.969163	0.892381	0.76171	0.472297	57.3833	0.9931	0.111246	0.980074	-1.23934	4.13508	-0.299477	1.73985
AKR1C1	Aldo-keto reductase family 1 member C1	Q04828	TPALIALR	251	YES	1	0.94792	0.982779	0.950616	0.757617	0.562231	10.0784	0.9905	0.535718	0.977322	-0.886086	7.48402	-0.476331	4.35694
AKR1C1	Aldo-keto reductase family 1 member C1	Q04828	YKPVCNQVECHPYFNQR	184	YES	1	1.02892	1.09742	1.05074	0.594108	0.337016	8.34948	0.9895	0.336716	1.04451	-1.67684	8.50001	-0.683686	3.00478
AKR1C1	Aldo-keto reductase family 1 member C1	Q04828	RTPALIALR	250	YES	1	0.923785	0.990401	0.958032	0.697332	0.530601	7.64726	0.9813	0.525611	0.971248	-0.900046	4.08533	-0.474483	2.27558
AKR1C1	Aldo-keto reductase family 1 member C1	Q04828	KLLDFCK	201	YES	1	0.906892	1.08476	1.07464	0.58589	0.317088	9.11463	0.9578	0.317081	1.01658	-1.66311	5.95268	-0.755219	3.05419
AKR1C1	Aldo-keto reductase family 1 member C1	Q04828	GVVVLAK	264	YES	1	1.11634	1.10803	0.967778	0.753755	0.6101	4.67054	0.9524	0.588969	1.07476	-0.968692	3.24821	-0.45202	2.12567
AKR1C1	Aldo-keto reductase family 1 member C1	Q04828	EDIFYTSK	77	YES	1	0.856245	0.874242	0.941046	0.770701	0.519352	11.1344	0.9097	0.519344	0.917883	-0.856378	5.68254	-0.402196	2.85299
AKR1C1	Aldo-keto reductase family 1 member C1	Q04828	SIGVSNFNR	162	YES	1	1.1332	1.09395	1.10411	0.931267	0.691181	11.9211	0.9271	0.689644	1.0828	-0.517861	3.10136	-0.0669711	0.251841
AKR1C1	Aldo-keto reductase family 1 member C1	Q04828	ALEATKLAIEAGFR	34	YES	1	0.962593	0.986528	1.01103	0.784038	0.519497	10.5398	0.9931	0.519486	0.99004	-0.960441	4.4051	-0.324781	1.08774
AKR1C1	Aldo-keto reductase family 1 member C1	Q04828	TPALIALRYQLQR	251	YES	1	0.980735	1.04032	1.0045	0.731689	0.569163	8.10497	0.9899	0.568216	1.00699	-0.918154	5.2621	-0.431078	3.02221
AKR1C1	Aldo-keto reductase family 1 member C1	Q04828	GVVVLAKSYNEQR	264	YES	1	0.923764	1.01201	0.920395	0.648417	0.466572	6.54584	0.9801	0.446209	0.978412	-0.917844	3.33053	-0.46344	1.76334
AKR1C1	Aldo-keto reductase family 1 member C1	Q04828	SKIADGSVK	67	YES	1	1.0822	0.971893	1.00008	0.567906	0.601968	1.74137	0.9717	0.584927	1.01804	-0.864831	4.33014	-0.800068	3.50873
AKR1C1	Aldo-keto reductase family 1 member C1	Q04828	IADGSVK	69	YES	1	0.849486	0.915639	0.810884	0.560955	0.432776	3.95608	0.954	0.398916	0.931301	-1.27689	2.33895	-0.597382	1.21225
AKR1C1	Aldo-keto reductase family 1 member C1	Q04828	LNDGHFMPVLGFGTYAPAEVPK	10	YES	1	0.956769	1.06033	0.920082	0.599681	0.30516	8.51819	0.9853	0.253003	1.00463	-1.69783	6.96451	-0.753732	3.72124
AKR1C1	Aldo-keto reductase family 1 member C1	Q04828	QNVQVFEFQLTSEEMK	279	YES	1	1.02538	0.948557	0.816952	0.621094	0.246291	95.6162	0.9953	1.01947	-0.506247	-1.85156	5.77602	-0.714557	3.69434
AKR1C1	Aldo-keto reductase family 1 member C1	Q04828	LNDGHFMPVLGFGTYAPAEVPKSK	10	YES	1	0.966797	1.1189	1.03622	0.592709	0.307305	8.98092	0.9745	0.307254	1.03051	-1.67545	6.15824	-0.751748	3.28194
PRDX4	Peroxiredoxin-4	Q13162	LKYFDKLN	264	YES	1	1.04386	0.959179	0.944899	1.01006	0.69634	30.7603	0.9193	0.696336	0.991602	-0.492023	2.55773	-0.0818513	0.383414
CBX3	Chromobox protein homolog 3	Q13185	EANMKCPQIVIAFYEER	155	YES	1	1.00379	0.928987	0.897228	0.878807	0.739479	65.2181	0.9349	0.540096	1.0018	-0.653425	2.13699	-0.433932	1.21156
PDE3A	cGMP-inhibited 3'	Q14432	ILSQVSYR	710	YES	1	0.971987	0.996826	1.0638	0.867134	0.719797	10.0968	0.9402	0.71982	1.00816	-0.458836	2.53279	-0.199747	0.987214
PDE3A	cGMP-inhibited 3'	Q14432	TNAFLVATSAPQAVLYNDR	844	YES	1	0.933033	0.902758	0.903654	0.655919	0.442377	9.18736	0.98	0.388914	0.951623	-1.04356	1.95002	-0.482133	2.0218
MCM6	DNA replication licensing factor MCM6	Q14566	TTGEGTSLRGDINVCIVGDPSTAK	379	YES	1	1.0303	1.03077	0.864726	0.755972	0.697335	1.04375	0.9802	0.715082	1.02442	-0.460617	2.14666	-0.257715	1.01073
MCM6	DNA replication licensing factor MCM6	Q14566	IQETQAELPRGSIPR	208	YES	1	1.07872	1.07418	1.05914	0.932768	0.68757	12.1911	0.9649	0.68734	1.053	-0.448719	3.09922	-0.124306	0.583113
MCM6	DNA replication licensing factor MCM6	Q14566	TSILAAANPISGHYDR	497	YES	1	0.97315	0.986094	0.988249	0.875899	0.700648	11.8847	0.9947	0.699685	0.986968	-0.469991	5.36476	-0.142532	1.6314
MCM6	DNA replication licensing factor MCM6	Q14566	GVLLMLFGGVPK	367	YES	1	0.974277	0.989577	1.01904	1.02081	0.737541	111.009	0.9736	0.320405	1.00074	-0.437965	3.62896	-0.0502746	0.226723
PTGR1	Prostaglandin reductase 1	Q14914	TGPLPPGPPPEIVIYQELR	248	YES	1	1.12277	0.919483	0.997814	0.58873	0.360073	7.10808	0.9514	0.353322	1.0154	-1.53309	2.66813	-0.939179	1.20722
PTGR1	Prostaglandin reductase 1	Q14914	IAICGAISTYNR	236	YES	1	0.888879	1.08986	0.923102	0.552776	0.442346	4.00131	0.938	0.439515	0.991424	-1.1865	3.23272	-0.587924	1.78371
PTGR1	Prostaglandin reductase 1	Q14914	LGFDVVFNYK	185	YES	1	0.981755	0.893185	0.922527	0.682859	0.490489	9.12642	0.9704	0.430485	0.967996	-1.36851	2.25121	-0.548624	0.66555
PTGR1	Prostaglandin reductase 1	Q14914	MEAFVVYR	267	YES	1	0.977395	1.18455	0.909172	0.577901	0.175898	10.4188	0.9537	0.0734093	1.04718	-1.96964	2.41974	-0.308663	0.266075
LLGL1	Lethal(2) giant larvae protein homolog 1	Q15334	GRPLPEPYEASR	800	YES	1	0.876297	0.969646	0.854849	0.789728	0.604039	39.437	0.9046	0.392668	0.958736	-0.56087	2.43273	-0.329503	1.18733
ERCC6L	DNA excision repair protein ERCC-6-like	Q2NKX8	AAEATNDYETLVKR	1193	YES	1	1.08798	1.16026	0.945348	0.744099	0.528483	6.9575	0.9374	0.478184	1.07835	-0.850813	2.05088	-0.33398	0.407106
PKN3	Serine/threonine-protein kinase N3	Q6P5Z2	TTNWQALLAR	820	YES	1	1.04049	1.02217	0.992132	0.842154	0.652458	13.0123	0.9926	0.606758	1.02151	-0.623624	2.24568	-0.216727	0.547111
TRABD2A	Metalloprotease TIKI1	Q86V40	HLEYVKLMMPLWMTPDQR	126	YES	1	0.568281	0.467844	0.543088	0.605345	0.501245	3.63947e+08	0.9383	0.999872	0.0733949	-1.06366	2.2744	-0.644978	0.761164
KIF2C	Kinesin-like protein KIF2C	Q99661	LRVLEDGK	419	YES	1	0.970265	0.850167	0.858208	0.753198	0.642407	20.2551	0.9557	0.429291	1.00194	-0.49866	2.09409	-0.421933	1.39888
PDCD2L	Programmed cell death protein 2-like	Q9BRP1	AAVLKPVLLGLR	2	YES	1	0.961883	0.926456	0.990078	0.904081	0.673318	15.7449	0.9555	0.671602	0.969592	-0.702875	4.23993	-0.118886	0.455847
PDCD2L	Programmed cell death protein 2-like	Q9BRP1	IAACQEQILR	257	YES	1	0.972069	0.976039	0.98962	0.754964	0.634121	8.594	0.9959	0.634096	0.984439	-0.547681	3.19758	-0.273206	1.33792
OSBPL10	Oxysterol-binding protein-related protein 10	Q9BXB5	LLEHGEEYVFTLPSAYAR	580	YES	1	1.01345	0.945095	0.930341	0.85195	0.703889	65.7729	0.9778	0.465807	1.00147	-0.397966	2.58899	-0.12822	0.620557
OSBPL10	Oxysterol-binding protein-related protein 10	Q9BXB5	VIDTTTLPVYPKK	674	YES	1	0.925968	0.962295	1.01619	0.904608	0.62578	13.9841	0.9526	0.62566	0.976112	-0.537461	2.36513	-0.124803	0.347201
ADNP	Activity-dependent neuroprotector homeobox protein	Q9H2P0	TLCPLCFSILKGPISDALAHHLR	622	YES	1	0.813758	0.73243	0.640218	0.511176	0.502319	0.137567	0.9914	0.423102	0.998429	-1.03067	2.28291	-0.968688	1.63388
OSBPL3	Oxysterol-binding protein-related protein 3	Q9H4L5	NFVFWQDVR	644	YES	1	1.03612	1.103	1.05437	0.780318	0.546285	9.57003	0.9761	0.545853	1.0485	-0.737619	3.26802	-0.23182	0.803732
ACAD9	Complex I assembly factor ACAD9	Q9H845	TVETLLLR	511	YES	1	1.10557	1.10597	1.06591	1.05853	0.739781	23.4862	0.9229	0.738679	1.06942	-0.63983	2.5126	-0.0890564	0.268094
ACAD9	Complex I assembly factor ACAD9	Q9H845	LSEFGLIQEK	336	YES	1	1.07904	1.02993	0.937138	0.946822	0.609755	136.686	0.9348	0.0832971	1.02078	-0.648612	2.0715	-0.0390485	0.079438
FARSB	Phenylalanine--tRNA ligase beta subunit	Q9NSD9	AAGASDVVLYK	54	YES	1	0.936823	0.90903	0.924421	0.759223	0.512697	31.1108	0.9757	0.3189	0.958037	-0.819101	4.17365	-0.329166	1.81691
FARSB	Phenylalanine--tRNA ligase beta subunit	Q9NSD9	TTLLPGLLK	452	YES	1	1.02428	0.993139	1.05112	0.908797	0.697666	11.6776	0.9757	0.69768	1.01716	-0.614085	4.50618	-0.140065	1.45486
FARSB	Phenylalanine--tRNA ligase beta subunit	Q9NSD9	TAEFQVAR	444	YES	1	0.981924	0.976062	1.07677	0.907348	0.633216	12.8848	0.9458	0.633044	1.00866	-0.665284	3.16111	-0.28155	1.44008
FARSB	Phenylalanine--tRNA ligase beta subunit	Q9NSD9	CAEIFAR	548	YES	1	0.933112	1.08721	1.11233	0.707613	0.523349	8.95896	0.9248	0.52336	1.03316	-0.750521	2.58967	-0.254894	0.630822
FARSB	Phenylalanine--tRNA ligase beta subunit	Q9NSD9	TYTIANQFPLNKLTELLR	384	YES	1	0.860404	1.03545	1.02211	0.662813	0.448218	9.23989	0.9307	0.448213	0.979494	-1.12505	3.25397	-0.562728	1.44234
FARSB	Phenylalanine--tRNA ligase beta subunit	Q9NSD9	LFEISDIVIKDSNTDVGAK	474	YES	1	0.962736	0.964264	0.972006	1.05502	0.676547	105.262	0.9315	0.268575	0.990806	-0.701999	3.10194	-0.117251	0.287408
FARSB	Phenylalanine--tRNA ligase beta subunit	Q9NSD9	AVHISNPK	436	YES	1	0.9828	0.836538	0.857553	0.750261	0.413417	93.8662	0.9417	-0.0873133	0.961607	-1.05176	2.41735	-0.581884	0.947922
FARSB	Phenylalanine--tRNA ligase beta subunit	Q9NSD9	IDVPANRYDLLCLEGLVR	65	YES	1	0.934754	0.979639	0.960173	0.761636	0.532918	10.9989	0.9866	0.518534	0.971426	-0.825276	6.0645	-0.309571	2.20876
DIAPH3	Protein diaphanous homolog 3	Q9NSV4	LLEMKTEGDETGVMDNLLEALQSGAAFR	1049	YES	1	0.491183	0.446448	0.399102	0.517569	0.381362	0.000986063	0.9588	0.434021	1.00001	-1.07844	2.06132	-1.20348	1.87073
FARSA	Phenylalanine--tRNA ligase alpha subunit	Q9Y285	LDAEPRPPPTQEAA	495	YES	1	1.1226	1.10374	1.13147	1.03922	0.580064	24.2524	0.9498	0.56609	1.08943	-0.808174	4.42309	-0.106115	0.341669
FARSA	Phenylalanine--tRNA ligase alpha subunit	Q9Y285	YGINNIR	469	YES	1	0.956966	1.02342	1.10619	0.81816	0.627744	9.86736	0.9207	0.627737	1.02165	-0.646158	2.85288	-0.314516	1.36225
FARSA	Phenylalanine--tRNA ligase alpha subunit	Q9Y285	DQHDTFFLRDPAEALQLPMDYVQR	272	YES	1	1.00162	0.978007	0.737207	0.712847	0.7192	0.310294	0.9998	0.715971	1.00088	-0.560802	2.01732	-0.290726	0.693165
AAR2	Protein AAR2 homolog	Q9Y312	AAVQMDPELAKR	2	YES	1	0.998226	1.04753	0.897324	0.854431	0.655721	62.3546	0.9402	0.380415	1.01442	-0.504626	3.38283	-0.242941	1.46978
IVNS1ABP	Influenza virus NS1A-binding protein	Q9Y6Y0	QVCGDYLLSR	119	YES	1	0.940488	0.963055	0.960221	0.619053	0.422415	7.64926	0.9937	0.419934	0.967869	-1.06479	4.20734	-0.52499	1.70873
ACTN4	Alpha-actinin-4	O43707	VGWEQLLTTIAR	734	NO	1	0.837069	0.90863	0.733407	0.975637	1.75517	18.9474	0.943	0.869822	1.75997	0.676766	2.54849	-0.0372298	0.0565224
ACTN4	Alpha-actinin-4	O43707	CQLEINFNTLQTK	351	NO	1	1.0717	0.841998	1.20062	1.47261	1.98517	17.4899	0.9503	0.978308	2.26682	0.730363	2.14949	0.325896	0.745763
TBC1D4	TBC1 domain family member 4	O60343	RAHTFSHPPSSTK	639	NO	1	1.82719	3.01403	2.44224	3.01249	3.26836	0.010772	0.9034	1.00046	2.93436	1.57136	2.58332	1.1854	2.17916
DIAPH1	Protein diaphanous homolog 1	O60610	LSVEEFFMDLHNFR	1129	NO	1	0.817512	1.28777	0.650878	0.899173	2.57997	34.863	0.9099	0.930917	2.58215	1.77058	3.36653	-0.044539	0.0402826
EIF5B	Eukaryotic translation initiation factor 5B	O60841	APIICVLGHVDTGK	631	NO	1	1.00873	1.06098	0.979468	0.979088	1.26419	104.305	0.9251	1.00561	1.5619	0.324526	2.45904	-0.0742434	0.314303
GATB	Glutamyl-tRNA(Gln) amidotransferase subunit B	O75879	SQTLIDLNR	204	NO	1	1.04759	1.05522	1.00488	1.14327	1.26934	10.2736	0.9541	1.02689	1.26959	0.392519	3.73281	0.223483	2.18801
GLUD1	Glutamate dehydrogenase 1	P00367	GASIVEDKLVEDLR	77	NO	1	1.00687	1.03026	0.978586	0.992053	1.29947	45.9282	0.9804	1.00153	1.30493	0.323446	3.46402	-0.00810008	0.0435874
ASS1	Argininosuccinate synthase	P00966	KVFIEDVSR	58	NO	1	0.981887	1.09571	1.02529	1.12819	1.34724	13.0127	0.9181	1.02568	1.34812	0.479058	2.14229	0.110172	0.699003
ASS1	Argininosuccinate synthase	P00966	QHGIPIPVTPK	166	NO	1	0.96081	1.03079	1.00739	1.05943	1.61115	22.0692	0.9917	0.999713	1.61968	0.594815	2.53016	0.077741	0.333395
ASS1	Argininosuccinate synthase	P00966	FELSCYSLAPQIK	128	NO	1	0.915296	1.05418	1.06085	0.982459	1.41555	27.6988	0.9097	1.00244	1.41564	0.557361	2.03648	0.0212399	0.07645
ASS1	Argininosuccinate synthase	P00966	TQDPAKAPNTPDILEIEFKK	210	NO	1	1.08918	1.14628	1.03964	1.29164	1.552	10.5224	0.9433	1.06871	1.5525	0.666604	2.13593	0.243933	0.657372
P4HB	Protein disulfide-isomerase	P07237	ALAPEYAK	58	NO	1	0.891432	1.05564	1.2657	1.38331	1.50773	0.763008	0.9601	0.944246	1.49432	0.750524	4.12035	0.411703	2.06376
P4HB	Protein disulfide-isomerase	P07237	TVIDYNGER	453	NO	1	0.980622	1.05289	1.12329	1.33006	1.47431	5.18417	0.9946	0.992716	1.54458	0.489139	4.69219	0.339864	3.4827
P4HB	Protein disulfide-isomerase	P07237	LAKVDATEESDLAQQYGVR	79	NO	1	1.04756	1.1489	1.04657	1.50776	1.42339	2.7848	0.934	1.06054	1.46564	0.522126	3.4117	0.454654	2.33768
P4HB	Protein disulfide-isomerase	P07237	FFPASADR	445	NO	1	0.915106	1.03629	1.46949	1.51667	1.50533	0.26029	0.9907	0.957662	1.51063	0.860969	2.85065	0.590146	1.68542
P4HB	Protein disulfide-isomerase	P07237	LKAEGSEIR	70	NO	1	1.03915	1.07523	1.35976	1.5796	1.57934	0.698943	0.9975	1.01805	1.59167	0.63136	4.89556	0.641325	4.3766
P4HB	Protein disulfide-isomerase	P07237	FFPASADRTVIDYNGER	445	NO	1	0.912256	0.939484	1.16206	1.49317	1.53374	1.43432	0.9885	0.947931	1.52818	0.996538	2.08786	0.969019	1.99347
P4HB	Protein disulfide-isomerase	P07237	NFEDVAFDEKK	376	NO	1	0.899896	0.954673	1.06949	1.35528	1.37802	1.77768	0.9765	0.950322	1.37849	0.438094	3.55805	0.358157	2.77471
P4HB	Protein disulfide-isomerase	P07237	KSNFAEALAAHK	31	NO	1	1.18128	1.51843	1.73634	2.2185	2.50978	2.48751	0.9937	0.994172	2.91161	0.969995	1.74444	0.962333	2.09181
P4HB	Protein disulfide-isomerase	P07237	TLDGFKK	462	NO	1	0.985143	0.877205	1.05468	1.20551	1.26785	2.10454	0.901	0.955665	1.25785	0.46059	2.76494	0.407957	2.10808
P4HB	Protein disulfide-isomerase	P07237	SNFAEALAAHK	32	NO	1	0.911784	0.932246	1.33421	1.53433	1.5696	0.852158	0.9894	0.947923	1.55202	0.653946	4.91985	0.596965	5.04512
P4HB	Protein disulfide-isomerase	P07237	VHSFPTLK	437	NO	1	0.865495	0.942657	1.07712	1.20109	1.38205	7.2579	0.9329	0.930443	1.45597	0.504033	2.18819	0.322369	1.31255
P4HB	Protein disulfide-isomerase	P07237	EADDIVNWLKK	121	NO	1	1.11016	1.27391	1.42759	1.89845	2.30353	10.9223	0.9951	1.0194	2.78953	1.02178	4.03887	0.79501	3.72257
P4HB	Protein disulfide-isomerase	P07237	AAGKLKAEGSEIR	66	NO	1	1.07106	1.07993	1.09812	1.18167	1.44592	12.5416	0.9556	1.06222	1.44613	0.724816	2.53064	0.286097	0.808879
P4HB	Protein disulfide-isomerase	P07237	GYPTIKFFR	98	NO	1	1.03623	1.00582	1.58198	1.92512	2.03394	0.825175	0.9946	1.00574	1.98832	0.98056	4.41536	0.925198	3.73239
P4HB	Protein disulfide-isomerase	P07237	EYTAGREADDIVNWLK	115	NO	1	0.83537	1.05561	1.11768	1.58464	1.66434	2.44399	0.9563	0.955421	1.67853	0.809585	2.70075	0.721603	2.27106
P4HB	Protein disulfide-isomerase	P07237	VDATEESDLAQQYGVR	82	NO	1	0.930149	0.995712	1.07688	1.34533	1.48417	4.19076	0.989	0.969341	1.5088	0.567894	2.90583	0.564303	3.03923
P4HB	Protein disulfide-isomerase	P07237	MDSTANEVEAVKVHSFPTLK	425	NO	1	0.878949	0.96473	1.12465	1.32155	1.42715	2.04892	0.9638	0.937148	1.43628	0.529337	4.0697	0.419378	3.25621
P4HB	Protein disulfide-isomerase	P07237	EADDIVNWLK	121	NO	1	0.874707	1.1272	1.21076	1.48461	1.6844	3.78062	0.957	0.949742	1.8037	0.747249	4.29994	0.516665	2.29544
EPRS1	Bifunctional glutamate/proline--tRNA ligase	P07814	AALLNQHYQVNFK	217	NO	1	1.02706	1.07946	1.01709	1.06507	1.25243	13.8299	0.9179	1.03077	1.25235	0.33292	3.62873	0.0742463	0.74311
EPRS1	Bifunctional glutamate/proline--tRNA ligase	P07814	LNLNNTVLSK	426	NO	1	1.00753	1.06362	1.04805	1.11542	1.35992	13.6965	0.9684	1.02979	1.36036	0.35373	3.11378	0.133645	1.11055
EPRS1	Bifunctional glutamate/proline--tRNA ligase	P07814	KGSQFGQSCCLR	328	NO	1	0.960819	0.983361	0.994108	1.03133	1.34113	18.9881	0.9913	0.98455	1.34372	0.38763	3.17755	0.00480611	0.018267
EPRS1	Bifunctional glutamate/proline--tRNA ligase	P07814	GMTVEGLK	465	NO	1	0.937693	1.06518	0.993427	0.995426	1.37131	24.4977	0.9341	0.998235	1.37131	0.449124	2.27458	-0.154471	0.284729
G6PD	Glucose-6-phosphate 1-dehydrogenase	P11413	VQPNEAVYTK	394	NO	1	0.916059	1.05068	0.970833	1.04166	1.41864	14.8754	0.9411	0.984404	1.41869	0.568076	5.02889	-0.0603557	0.14306
G6PD	Glucose-6-phosphate 1-dehydrogenase	P11413	KPGMFFNPEESELDLTYGNR	408	NO	1	1.03046	1.05032	0.981029	1.12154	1.45413	15.1124	0.9817	1.01543	1.45641	0.63677	4.68886	0.164042	1.18542
MTHFD1	C-1-tetrahydrofolate synthase	P11586	KVVGDVAYDEAKER	251	NO	1	1.02726	1.06194	1.06639	1.15198	1.43299	13.626	0.9772	1.0388	1.43404	0.373561	2.11598	0.102047	0.588772
MTHFD1	C-1-tetrahydrofolate synthase	P11586	VLLSALERLK	355	NO	1	1.18143	1.27059	1.39603	1.50176	1.53666	0.146674	0.9978	1.00132	1.60264	0.590314	2.24959	0.389654	1.10664
HNRNPL	Heterogeneous nuclear ribonucleoprotein L	P14866	VFNVFCLYGNVEK	399	NO	1	0.948217	1.03169	1.23609	1.33349	1.56989	6.79839	0.9678	0.963535	1.71835	0.683065	4.45668	0.457011	2.53409
HNRNPL	Heterogeneous nuclear ribonucleoprotein L	P14866	VFNVFCLYGNVEKVK	399	NO	1	0.989572	1.08525	1.04048	1.66083	1.90908	6.45703	0.9931	1.02467	1.91174	0.894333	2.09096	0.542063	0.751783
PRKACA	cAMP-dependent protein kinase catalytic subunit alpha	P17612	IKTLGTGSFGR	47	NO	1	0.990243	1.03169	1.06109	1.09827	1.25751	9.52513	0.9341	1.00065	1.27755	0.261993	2.24358	0.143137	1.24096
NELFE	Negative elongation factor E	P18615	SFDWGYEER	165	NO	1	1.09604	1.34047	1.40523	1.34824	1.4893	0.0281528	0.9449	0.999344	1.41739	0.42197	2.29144	0.249356	0.967984
CFL1	Cofilin-1	P23528	ASGVAVSDGVIKVFNDMKVR	2	NO	1	1.05928	1.22875	1.14457	1.19234	1.80104	20.7244	0.9281	1.10803	1.81047	0.912192	2.09436	0.224429	0.687468
UQCRC1	Cytochrome b-c1 complex subunit 1	P31930	NALVSHLDGTTPVCEDIGR	397	NO	1	0.796593	0.955076	0.844843	1.10104	2.15748	14.6595	0.9793	0.899127	2.15779	1.22348	3.26357	0.229349	0.365117
UQCRC1	Cytochrome b-c1 complex subunit 1	P31930	LCTSATESEVAR	379	NO	1	1.0888	1.15655	1.04992	1.33798	2.27496	17.0914	0.9887	1.07362	2.29231	1.14806	5.29661	0.367966	1.36248
UQCRC1	Cytochrome b-c1 complex subunit 1	P31930	MVLAAAGGVEHQQLLDLAQK	229	NO	1	1.26183	1.69414	2.01631	2.56022	4.34475	47.591	0.9713	1.16606	6.38542	2.24434	4.71611	1.25713	1.97162
KIF5B	Kinesin-1 heavy chain	P33176	STLLFGQR	314	NO	1	0.905899	0.956405	0.974723	0.979232	1.26194	26.4866	0.9402	0.959222	1.26987	0.411703	3.50129	0.0594877	0.341329
KIF5B	Kinesin-1 heavy chain	P33176	ILQDSLGGNCR	285	NO	1	0.8869	0.987748	0.980561	0.92102	1.31663	33.0875	0.9194	0.955245	1.31665	0.369024	2.29419	0.00774144	0.022235
KIF5B	Kinesin-1 heavy chain	P33176	LYLVDLAGSEKVSK	227	NO	1	0.996816	1.09105	1.04627	1.14788	1.38033	12.9425	0.9428	1.03342	1.3815	0.410222	2.66735	0.101849	0.422652
ATP6V1A	V-type proton ATPase catalytic subunit A	P38606	LASFYER	382	NO	1	0.908067	0.933685	0.990526	0.983205	1.27168	26.6967	0.9312	0.95797	1.28312	0.319129	2.2425	-0.030222	0.168236
IARS1	Isoleucine--tRNA ligase	P41252	ESVDHLTIPSR	501	NO	1	1.03102	1.06649	1.11144	1.0829	1.41512	18.7517	0.9394	1.05207	1.41575	0.538406	2.70949	0.14847	0.642885
IARS1	Isoleucine--tRNA ligase	P41252	LRAEPDHMVLGKR	892	NO	1	0.909682	1.00127	0.967036	1.06759	1.25866	12.7689	0.9251	0.969458	1.2597	0.319088	2.47521	0.0862446	0.462962
TMPO	Lamina-associated polypeptide 2	P42166	NLFISCK	275	NO	1	1.07088	1.64409	1.53737	1.71156	1.75772	0.0252288	0.9514	0.999637	1.66954	0.570289	1.7522	0.592665	2.13356
ACADVL	Very long-chain specific acyl-CoA dehydrogenase	P49748	LWISNGGLADIFTVFAK	248	NO	1	1.00882	1.92922	3.0704	2.7624	2.69661	0.0997166	0.9809	1.00435	2.84317	1.48072	2.48735	1.08319	1.62812
RPS6KA3	Ribosomal protein S6 kinase alpha-3	P51812	EASAVLFTITK	515	NO	1	0.978517	1.02606	1.08403	1.03608	1.29408	18.7183	0.9065	1.02194	1.29418	0.375798	2.05894	0.0520425	0.165099
HK2	Hexokinase-2	P52789	DVVALIRK	184	NO	1	0.961665	1.03661	1.03865	1.04499	1.25706	36.5445	0.9271	1.00803	1.31428	0.269405	2.53233	-0.0353321	0.152248
EIF4A1	Eukaryotic initiation factor 4A-I	P60842	GYDVIAQAQSGTGK	69	NO	1	0.963573	1.03025	1.02579	1.03078	1.43243	19.849	0.9815	1.00483	1.4331	0.415342	3.39396	0.0357342	0.211025
RPS21	Small ribosomal subunit protein eS21	P63220	MQNDAGEFVDLYVPRKCSASNR	1	NO	1	1.03864	1.07673	1.25712	1.71351	1.53371	1.15595	0.9555	1.03842	1.6237	0.770864	3.50351	0.819175	4.15937
PRKDC	DNA-dependent protein kinase catalytic subunit	P78527	GYGLFAGPCK	365	NO	1	0.990406	1.05508	1.03532	1.05425	1.29184	17.1571	0.9559	1.02019	1.29231	0.397706	3.5279	0.0831551	0.457006
PRKDC	DNA-dependent protein kinase catalytic subunit	P78527	CGAALAGHQLIR	25	NO	1	0.993358	1.05046	1.04529	1.06439	1.28865	13.5204	0.9554	1.02227	1.28864	0.360347	3.08435	-0.00432588	0.0149383
PRKDC	DNA-dependent protein kinase catalytic subunit	P78527	NCISTVVHQGLIR	477	NO	1	0.970779	0.938722	1.01951	0.931898	1.48531	66.5571	0.9744	0.972179	1.53965	0.587603	3.90374	-0.273932	0.59655
MRPS15	Small ribosomal subunit protein uS15m	P82914	DYQNVPGIEKVDDVVKR	75	NO	1	1.60466	1.6745	1.66112	1.79062	1.69693	0.000106758	0.9812	1.00014	1.73908	0.210613	0.179495	0.668889	2.32259
HNRNPU	Heterogeneous nuclear ribonucleoprotein U	Q00839	APQCLGKFIEIAAR	559	NO	1	0.98116	1.00078	1.07923	1.39069	1.55972	5.04426	0.9994	0.990821	1.58258	0.503505	2.16571	0.351868	1.46606
PPP2R5D	Serine/threonine-protein phosphatase 2A 56 kDa regulatory subunit delta isoform	Q14738	QCCVLFDFVSDPLSDLKFK	124	NO	1	0.908752	1.01642	1.0242	0.97054	1.4015	22.3436	0.9429	0.983824	1.40147	0.455516	2.44368	-0.0482996	0.117085
LRRC14	Leucine-rich repeat-containing protein 14	Q15048	ALLQERPSTESMQAVILGLTAR	74	NO	1	0.984375	1.10775	1.07374	1.13444	1.43852	14.181	0.9238	1.04149	1.43907	0.425862	2.16884	-0.180916	0.267031
TOMM34	Mitochondrial import receptor subunit TOM34	Q15785	DCTSALALVPFSIKPLLR	73	NO	1	1.01972	1.00586	1.19721	1.34649	1.49705	3.23267	0.9861	0.993054	1.54318	0.585366	2.57617	0.414156	1.63123
PSMD5	26S proteasome non-ATPase regulatory subunit 5	Q16401	AAQALALLR	2	NO	1	0.901792	0.9918	1.00884	1.14603	1.33641	14.2377	0.9518	0.961192	1.4089	0.344265	3.47376	0.12959	1.18857
PSMD5	26S proteasome non-ATPase regulatory subunit 5	Q16401	LGPLFSLLNENHR	46	NO	1	0.945022	1.00417	1.01899	1.06428	1.27698	13.4497	0.9539	0.992044	1.27717	0.355251	2.93056	0.104082	0.714626
PSMD5	26S proteasome non-ATPase regulatory subunit 5	Q16401	LLQAMEPVHVAR	71	NO	1	1.03148	1.12884	1.06004	1.05229	1.40395	17.1464	0.918	1.0538	1.4039	0.425428	3.81427	-0.0499655	0.157997
QRICH1	Transcriptional regulator QRICH1	Q2TAL8	LYDFYLFK	705	NO	1	0.949322	0.930581	1.00851	1.11114	1.49825	29.0404	0.9841	0.966846	1.62686	0.731764	2.1839	0.427774	1.10706
PRPF8	Pre-mRNA-processing-splicing factor 8	Q6P2Q9	LLILALER	838	NO	1	0.957751	1.04978	1.12623	1.17519	1.33568	6.59854	0.9481	0.978422	1.41056	0.407692	2.83897	0.239346	1.24287
PRPF8	Pre-mRNA-processing-splicing factor 8	Q6P2Q9	FTLWWSPTINR	1534	NO	1	0.89275	1.21152	1.27395	1.45269	1.76529	13.6825	0.9345	0.956754	2.11151	0.689854	3.48437	0.272885	0.58455
PRPF8	Pre-mRNA-processing-splicing factor 8	Q6P2Q9	ELGGLGMLSMGHVLIPQSDLR	1321	NO	1	0.890104	1.02695	1.11263	1.25097	1.45553	8.2772	0.9524	0.952702	1.56624	0.57558	3.05752	0.478839	2.22796
DCXR	L-xylulose reductase	Q7Z4W1	AVIQVSQIVAR	110	NO	1	0.974093	0.985483	1.01209	1.15211	1.34439	14.0532	0.9967	0.986013	1.39074	0.450711	3.14711	0.218906	1.28158
ENAH	Protein enabled homolog	Q8N8S7	LEQEQLERER	186	NO	1	2.21771	3.1373	3.18777	4.78195	4.42202	0.132312	0.9391	1.00868	5.05675	1.78495	2.83101	1.92743	3.05394
JMY	Junction-mediating and -regulatory protein	Q8N9B5	SAWVSQER	669	NO	1	1.0601	1.56248	1.51752	1.7408	1.71779	0.0366975	0.944	0.994948	1.66234	0.733788	2.01061	-0.432267	0.180237
SYNE2	Nesprin-2	Q8WXH0	ANEFEFVLSQFKDFGVR	5489	NO	1	1.19143	1.53116	1.64183	1.72402	1.94261	0.14746	0.9672	0.988235	1.9737	0.962273	2.10849	0.509955	0.88528
DDX1	ATP-dependent RNA helicase DDX1	Q92499	FLVLDEADGLLSQGYSDFINR	366	NO	1	0.91799	0.996676	0.95042	0.970554	1.32197	26.5218	0.9576	0.966223	1.32292	0.531059	3.18468	0.061612	0.254763
DDX1	ATP-dependent RNA helicase DDX1	Q92499	ALIVEPSR	289	NO	1	0.873702	0.885064	0.9671	0.988896	1.53857	19.1926	0.963	0.931449	1.54055	0.662462	3.49702	0.130183	0.492269
DDX1	ATP-dependent RNA helicase DDX1	Q92499	LNLSQVR	359	NO	1	0.975442	1.04609	1.07134	1.00078	1.61984	32.2615	0.9802	1.01866	1.62028	0.568529	3.57834	-0.0244211	0.09808
DDX1	ATP-dependent RNA helicase DDX1	Q92499	TGAFSIPVIQIVYETLKDQQEGKK	53	NO	1	1.11908	1.07142	1.01313	1.1251	1.5815	15.4309	0.9614	1.05092	1.58172	0.502649	2.58897	0.114091	0.380741
DDX1	ATP-dependent RNA helicase DDX1	Q92499	ELAEQTLNNIK	297	NO	1	0.919506	0.971688	0.985075	1.16064	1.51656	21.8368	0.9867	0.96295	1.62258	0.593524	4.77287	0.170024	0.954778
DDX1	ATP-dependent RNA helicase DDX1	Q92499	LDDLVSTGKLNLSQVR	350	NO	1	0.938994	0.933532	0.94988	1.03298	1.36837	16.9284	0.9801	0.955573	1.37122	0.560315	2.62663	0.120632	0.520771
DDX1	ATP-dependent RNA helicase DDX1	Q92499	TGAFSIPVIQIVYETLKDQQEGK	53	NO	1	1.01422	0.996531	1.06497	1.13779	1.34833	19.4304	0.9835	1.0073	1.42362	0.418779	2.1428	0.168403	0.668459
DDX1	ATP-dependent RNA helicase DDX1	Q92499	ALIVEPSRELAEQTLNNIK	289	NO	1	1.06451	1.03066	1.02338	1.10105	1.43705	13.978	0.9842	1.02965	1.4371	0.462792	4.59497	0.152145	1.56628
KIFBP	KIF-binding protein	Q96EK5	LCFMEAR	264	NO	1	1.29241	1.38847	1.33349	1.39836	1.5596	0.417789	0.9283	0.998832	1.7509	0.529599	2.5096	0.0389994	0.0380803
GINS3	DNA replication complex GINS protein PSF3	Q9BRX5	LGAFFLER	43	NO	1	0.98108	0.968514	0.982613	0.998177	1.34111	30.328	0.9952	0.983047	1.35314	0.446944	3.79773	0.0875469	0.546192
QRSL1	Glutamyl-tRNA(Gln) amidotransferase subunit A	Q9H0R6	ILSGNFFLLK	377	NO	1	0.906638	0.999016	0.835537	1.08681	1.61235	13.6082	0.9507	0.935302	1.61258	0.864149	2.43208	0.083972	0.0946084
OSBPL2	Oxysterol-binding protein-related protein 2	Q9H1P3	SDFSVWTILKK	72	NO	1	0.974287	1.21838	0.890967	1.52586	2.81628	12.8511	0.978	1.02088	2.8171	1.3685	3.76269	0.623969	1.32085
TXNIP	Thioredoxin-interacting protein	Q9H3M7	VILDLPLVIGSR	288	NO	1	1.02928	0.995434	1.26708	1.23109	1.30609	0.384445	0.9663	1.00784	1.26989	0.510476	2.10771	0.397057	1.54732
HEATR1	HEAT repeat-containing protein 1	Q9H583	GLVGNPLPSVR	1606	NO	1	1.07058	1.05498	1.23009	1.22856	1.42556	3.51477	0.9171	1.00121	1.48952	0.425322	2.3445	0.268576	1.35579
COG4	Conserved oligomeric Golgi complex subunit 4	Q9H9E3	MSFLVTLNNVEVCSENISTLKK	542	NO	1	1.05815	1.07825	1.15972	1.28462	1.29734	0.954468	0.9807	1.01381	1.32952	0.381835	2.5988	-0.553566	0.310969
SNX7	Sorting nexin-7	Q9UNH6	RYQDFLWLK	73	NO	1	1.33734	2.02492	2.2571	2.79122	2.22344	0.0403018	0.9133	0.99741	2.46689	1.18179	2.28984	0.894679	1.00925
MTO1	Protein MTO1 homolog	Q9Y2Z2	LFFAGQINGTTGYEEAAAQGVIAGINASLR	427	NO	1	0.99756	1.14214	1.84905	2.17802	2.41347	0.649711	0.9924	0.975577	2.36279	1.03273	2.26308	0.354977	0.252261

## Sheet: E2-responsive segments
Gene names	Protein names	Uniprot entry	Sequence	Sequence start position	IsStabilized	Ratio_E2 treatment vs Vehicle						EC50 (uM)	R2	lower	upper	Bayes T-test
						0nM vs. 0nM	20nM vs. 0nM	200nM vs. 0nM	2uM vs. 0nM	20uM vs. 0nM	100uM vs. 0nM					Log2FC	-Log10P.Value
ACAD9	Complex I assembly factor ACAD9	Q9H845	TVETLLLR	511	YES	1	1.0923	1.06795	1.00152	1.00267	0.674768	35.584	0.9429	0.616473	1.04108	-0.63983	2.5126
AKR1C1	Aldo-keto reductase family 1 member C1	Q04828	TPALIALR	251	YES	1	0.977402	1.01905	0.97114	0.679811	0.467753	7.8652	0.9965	0.454589	0.998651	-1.67684	8.50001
AKR1C2	Aldo-keto reductase family 1 member C2	P52895	LLEMILNKPGLK	172	YES	1	1.0599	1.06172	0.995711	0.499176	0.21755	6.71415	0.9961	0.204335	1.04052	-2.00358	7.69834
CLUH	Clustered mitochondria protein homolog	O75153	VVEEPYTVR	118	YES	1	1.00491	0.985271	1.02662	0.808068	0.621647	9.90349	0.9932	0.621645	1.0042	-0.62113	4.68703
DCK	Deoxycytidine kinase	P27707	STFVNILK	35	YES	1	0.906268	0.932254	0.898135	0.766013	0.442002	50.9548	0.9781	0.134608	0.949237	-0.97254	4.87938
ECHS1	Enoyl-CoA hydratase	P30084	LFYSTFATDDRK	262	YES	1	0.996089	0.99491	0.997442	0.921132	0.574599	17.9575	0.9999	0.569853	0.997165	-0.90281	6.15717
FARSA	Phenylalanine--tRNA ligase alpha subunit	Q9Y285	LDAEPRPPPTQEAA	495	YES	1	1.02706	1.03506	0.991619	0.856742	0.642336	16.857	0.9934	0.579007	1.02039	-0.80817	4.42309
FARSB	Phenylalanine--tRNA ligase beta subunit	Q9NSD9	AAGASDVVLYK	54	YES	1	0.952104	0.972667	0.99706	0.814089	0.554754	11.1028	0.99	0.554715	0.980461	-0.61409	4.50618
HADHA	Trifunctional enzyme subunit alpha	P40939	TVLGTPEVLLGALPGAGGTQRLPK	167	YES	1	0.99449	0.982011	0.97716	0.8899	0.597938	65.7616	0.9989	0.326923	0.992942	-0.78293	5.42019
MCM6	DNA replication licensing factor MCM6	Q14566	TTGEGTSLRGDINVCIVGDPSTAK	379	YES	1	1.01411	1.02015	0.982789	0.896362	0.705773	36.2971	0.9956	0.570058	1.01149	-0.46999	5.36476
OSBPL10	Oxysterol-binding protein-related protein 10	Q9BXB5	LLEHGEEYVFTLPSAYAR	580	YES	1	0.96971	0.953695	0.973263	0.878279	0.664834	14.6465	0.9859	0.659856	0.97442	-0.39797	2.58899
P4HB	Protein disulfide-isomerase	P07237	HNQLPLVIEFTEQTAPK	231	YES	1	0.91528	0.983395	0.712818	0.446293	0.361473	1.37264	0.9844	0.36985	0.974441	-1.7601	3.0765
PDCD2L	Programmed cell death protein 2-like	Q9BRP1	AAVLKPVLLGLR	2	YES	1	0.966976	0.951247	0.989849	0.829522	0.653719	10.4877	0.9839	0.653667	0.97704	-0.70288	4.23993
PDE3A	cGMP-inhibited 3'	Q14432	ILSQVSYR	710	YES	1	0.95251	0.949792	0.983728	0.761527	0.581087	9.63769	0.987	0.581034	0.971509	-0.45884	2.53279
PTGR1	Prostaglandin reductase 1	Q14914	TGPLPPGPPPEIVIYQELR	248	YES	1	0.9927	1.02177	0.938154	0.600566	0.367201	6.83781	0.9983	0.33945	1.00556	-1.1865	3.23272
YARS1	Tyrosine--tRNA ligase	P54577	EYTLDVYR	128	YES	1	0.958545	0.997268	0.976741	0.869366	0.647538	17.7441	0.9884	0.615797	0.985017	-0.50093	5.37888
ACTN4	Alpha-actinin-4	O43707	VGWEQLLTTIAR	734	NO	1	0.954383	0.875314	0.967012	1.22412	1.87017	20.5218	0.9883	0.944966	1.97503	0.676766	2.54849
ASS1	Argininosuccinate synthase	P00966	KVFIEDVSR	58	NO	1	0.986793	1.08174	1.03329	1.11543	1.48149	13.7192	0.9687	1.02546	1.48155	0.594815	2.53016
DDX1	ATP-dependent RNA helicase DDX1	Q92499	FLVLDEADGLLSQGYSDFINR	366	NO	1	0.97793	0.991457	1.00316	1.06472	1.46652	22.2891	0.9979	0.992938	1.48402	0.593524	4.77287
EPRS1	Bifunctional glutamate/proline--tRNA ligase	P07814	AALLNQHYQVNFK	217	NO	1	0.983277	1.0479	1.01317	1.05181	1.3312	14.9579	0.9734	1.01108	1.33123	0.33292	3.62873
G6PD	Glucose-6-phosphate 1-dehydrogenase	P11413	VQPNEAVYTK	394	NO	1	0.973262	1.0505	0.975931	1.0816	1.43639	15.8142	0.9754	0.999913	1.43755	0.568076	5.02889
HNRNPL	Heterogeneous nuclear ribonucleoprotein L	P14866	VFNVFCLYGNVEK	399	NO	1	0.968895	1.05847	1.13828	1.49716	1.73949	5.86133	0.9951	0.994912	1.81431	0.683065	4.45668
IARS1	Isoleucine--tRNA ligase	P41252	ESVDHLTIPSR	501	NO	1	0.970352	1.03388	1.03924	1.07524	1.33689	36.6287	0.9678	1.00818	1.4331	0.538406	2.70949
KIF5B	Kinesin-1 heavy chain	P33176	STLLFGQR	314	NO	1	0.929872	1.01173	1.00052	1.01604	1.31963	13.4734	0.9554	0.985515	1.31963	0.411703	3.50129
MTHFD1	C-1-tetrahydrofolate synthase	P11586	KVVGDVAYDEAKER	251	NO	1	1.10435	1.16626	1.23121	1.32687	1.48482	2.02299	0.977	1.00023	1.57683	0.590314	2.24959
P4HB	Protein disulfide-isomerase	P07237	ALAPEYAK	58	NO	1	0.964797	1.05759	1.24091	1.5037	1.62081	1.81756	0.9966	0.980245	1.65075	0.596965	5.04512
PRKDC	DNA-dependent protein kinase catalytic subunit	P78527	GYGLFAGPCK	365	NO	1	0.984848	1.01475	1.03337	1.01685	1.35526	20.5406	0.9872	1.00814	1.35538	0.587603	3.90374
PRPF8	Pre-mRNA-processing-splicing factor 8	Q6P2Q9	LLILALER	838	NO	1	0.913535	1.09608	1.17094	1.29295	1.51883	9.95517	0.948	0.964364	1.69304	0.689854	3.48437
PSMD5	26S proteasome non-ATPase regulatory subunit 5	Q16401	AAQALALLR	2	NO	1	0.959432	1.0416	1.02929	1.08754	1.33911	12.1032	0.9565	1.00758	1.33912	0.425428	3.81427
UQCRC1	Cytochrome b-c1 complex subunit 1	P31930	NALVSHLDGTTPVCEDIGR	397	NO	1	1.04907	1.26859	1.30369	1.66641	2.92573	25.3611	0.9785	1.12736	3.32246	1.14806	5.29661
