# Supplementary material for: A Two-Dimensional Peptide-Centric Stability Assay Maps Multidimensional Target Landscapes Unveiling 17β-Estradiol (E2)-GPX4 Binding-Induced Ferroptosis
Source: Research Square preprint supplement (doi:10.21203/rs.3.rs-6893001/v1), 2025-07-04
Supplement: Supplementary file 10 [file 6ed0fdfba594176368caa3af.xlsx]

## Sheet: parameter description
Supplementary table 5
This file summarizes 17β-Estradiol (E2)-responsive peptides and segments identified by 2D-PELSA analysis of BT474 cell lysates
Tab descriptions
A	E2-responsive peptides	Summary of E2-responsive peptides as measured by 2D-PELSA in BT474 cell lysates
B	E2-responsive segments	Summary of E2-responsive segments as measured by 2D-PELSA in BT474 cell lysates
Experimental Setup	Compound	Concentration [mM]	Data acquisition	Replicate	Cell Line
2D-PELSA experiment, related to Figure 2	E2	100	DIA	Lysate replicate1	BT474
	E2	100	DIA	Lysate replicate2
	E2	100	DIA	Lysate replicate3
	E2	100	DIA	Lysate replicate4
	E2	100	DIA	Lysate replicate5
	E2	20	DIA	Lysate replicate1
	E2	20	DIA	Lysate replicate2
	E2	20	DIA	Lysate replicate3
	E2	20	DIA	Lysate replicate4
	E2	20	DIA	Lysate replicate5
	E2	2	DIA	Lysate replicate1
	E2	2	DIA	Lysate replicate2
	E2	2	DIA	Lysate replicate3
	E2	2	DIA	Lysate replicate4
	E2	2	DIA	Lysate replicate5
	E2	0.2	DIA	Lysate replicate1
	E2	0.2	DIA	Lysate replicate2
	E2	0.2	DIA	Lysate replicate3
	E2	0.2	DIA	Lysate replicate4
	E2	0.2	DIA	Lysate replicate5
	E2	0.02	DIA	Lysate replicate1
	E2	0.02	DIA	Lysate replicate2
	E2	0.02	DIA	Lysate replicate3
	E2	0.02	DIA	Lysate replicate4
	E2	0.02	DIA	Lysate replicate5
	DMSO	same volume as the added E2 (1% volume of lysates )	DIA	Lysate replicate1
	DMSO	same volume as the added E2 (1% volume of lysates )	DIA	Lysate replicate2
	DMSO	same volume as the added E2 (1% volume of lysates )	DIA	Lysate replicate3
	DMSO	same volume as the added E2 (1% volume of lysates )	DIA	Lysate replicate4
	DMSO	same volume as the added E2 (1% volume of lysates )	DIA	Lysate replicate5
Column descriptions
	Sequence	The amino acid sequence of PELSA quantified peptide
	Sequence start position	The N-terminal position of the corresponding peptide on the protein sequence
	Log2FC	Log2 intensity fold change of the proxy peptide that was used to represent its parent protein (moderated empirical Bayes t-test)
	-Log10P.Value	-Log10 P.Value of the proxy peptide that was used to represent its parent protein (moderated empirical Bayes t-test)
	domain_description	domain description in pfam database
	IsStabilized	yes/no log2 intensity fold change <0
	Ratio_STU treatment vs Vehice	Relative averaged peptide intensity under ligand treatment to that under vehicle treatment
	EC50 (mM)	The EC50 values calculated by fitting peptide's Ratio and ligand concentrations to a four-parameter log-logistic model.
	R2	The pearson correlation to a sigmoid trend of the ligand dose-response profile
	Lower	The bottom plateaus of the dose-response curve
	Upper	The top plateaus of the dose-response curve

## Sheet: A E2-responsive peptides
Gene names	Protein names	Uniprot entry	Sequence	Sequence start position	IsStabilized	Ratio_E2 treatment vs Vehicle						EC50 (uM)	R2	lower	upper	Bayes T-test
						0nM vs. 0nM	20nM vs. 0nM	200nM vs. 0nM	2uM vs. 0nM	20uM vs. 0nM	100uM vs. 0nM					Log2FC_100uM	-Log10P.Value_100uM	Log2FC_10uM	-Log10P.Value_10uM
NQO1	NAD(P)H dehydrogenase [quinone] 1	P15559	ALIVLAHSER	6	YES	1	0.871836	1.01247	1.06628	1.02822	0.0899164	50.4225	0.9692	0.0469017	0.995907	-2.90783	2.59018	-0.851424	0.583382
AAR2	Protein AAR2 homolog	Q9Y312	LPEMKPR	195	YES	1	0.711411	0.95388	0.632573	0.257997	0.222613	1.10955	0.9119	0.240265	0.888439	-2.62678	4.71226	-1.82617	4.09597
GPX4	Phospholipid hydroperoxide glutathione peroxidase GPX4	P36969	DIDGHMVNLDKYR	48	YES	1	1.00639	1.1586	0.732846	0.372628	0.177976	2.07267	0.9621	0.189487	1.05717	-2.60168	5.49225	-1.83284	2.45324
GPX4	Phospholipid hydroperoxide glutathione peroxidase GPX4	P36969	ILAFPCNQFGK	97	YES	1	1.12257	1.0605	0.737571	0.348923	0.169354	2.00569	0.9859	0.159392	1.07577	-2.5454	6.70187	-2.12141	2.99973
CRLF3	Cytokine receptor-like factor 3	Q8IUI8	ENVEAAQSYR	18	YES	1	0.736461	0.117351	0.0897309	0.124798	0.099493	0.0148037	0.9992	0.1047	0.999993	-2.64636	2.78194	-2.32348	2.81264
MVK	Mevalonate kinase	Q03426	VDLSLPNIGIK	49	YES	1	1.16226	0.952538	0.886679	0.757723	0.293668	102.669	0.9431	-0.45016	1.04858	-2.29986	2.58285	-0.400667	1.34191
ATAD5	ATPase family AAA domain-containing protein 5	Q96QE3	QMENTTSHANSRDNVTEAAQLNDSIITVSYEEFLK	238	YES	1	1.01421	0.989893	1.08396	0.901196	0.115024	15.6321	0.9919	0.11451	1.02199	-2.2762	2.35052	-0.140216	0.0745195
YARS1	Tyrosine--tRNA ligase	P54577	HVLFPLKSEFVILRDEK	266	YES	1	1.11461	0.8399	0.636917	0.591747	0.193231	42.2214	0.92	-0.403141	1.05288	-2.21558	5.21124	-0.704334	2.37263
RBP1	Retinol-binding protein 1	P09455	GWTQWIEGDELHLEMR	106	YES	1	1.02429	0.864192	0.836765	0.823647	0.360239	223.883	0.9242	-0.631742	0.954948	-2.17812	2.48626	-0.283889	0.693637
BRD7	Bromodomain-containing protein 7	Q9NPI1	NNDYQSIEELKDNFK	187	YES	1	1.11834	0.856707	0.915498	0.883829	0.209148	113.436	0.9257	-0.671207	0.977622	-2.10974	5.26666	-0.251317	0.716316
DECR1	2	Q16698	EQWDTIEELIRK	320	YES	1	1.12714	1.17227	1.08579	1.0354	0.233489	20.2884	0.9741	0.230908	1.0963	-2.09508	4.37582	-0.420551	0.641943
MTA1	Metastasis-associated protein MTA1	Q13330	AGVVNGTGAPGQSPGAGR	374	YES	1	0.992483	0.788799	0.6509	0.49803	0.234308	10.5442	0.9805	-0.107381	1.02023	-2.00116	3.7223	-1.37673	2.57486
EIF2S3	Eukaryotic translation initiation factor 2 subunit 3	P41091	YNIEVVCEYIVK	230	YES	1	1.00532	0.651753	0.684905	0.523582	0.25175	29.7744	0.908	-0.255788	1.01754	-1.99395	4.55062	-0.944632	2.24579
ZNF45	Zinc finger protein 45	Q02386	YLPHEELFCSQIWQQITR	96	YES	1	1.08337	1.05444	0.967116	0.700879	0.257275	21.1657	0.992	0.0439361	1.04755	-1.93346	4.37024	-0.526053	0.990613
RBP1	Retinol-binding protein 1	P09455	PVDFTGYWK	2	YES	1	0.957318	0.883914	0.82412	0.738739	0.308056	85.2387	0.9698	-0.251916	0.951578	-1.7925	5.81081	-0.308446	1.64198
ICMT	Protein-S-isoprenylcysteine O-methyltransferase	O60725	RVPTGLPFIK	269	YES	1	1.12401	0.852957	0.429911	0.579379	0.30251	0.116516	0.9142	0.437251	1.062	-1.73489	3.17658	-1.07572	2.34167
CES2	Cocaine esterase	O00748	SFFGGNYIKFTEEEEQLSR	467	YES	1	0.805199	0.538982	0.312795	0.313102	0.514121	0.0251581	0.9179	0.381368	0.995199	-1.35611	1.61976	-1.71687	2.3538
PDCD2L	Programmed cell death protein 2-like	Q9BRP1	LLHVFACACPGCSTGGAR	74	YES	1	0.774194	0.940655	0.890688	0.840992	0.264176	15.8255	0.9226	0.264102	0.901385	-1.69821	4.91876	-0.293482	0.626679
PTGR1	Prostaglandin reductase 1	Q14914	MEAFVVYR	267	YES	1	0.947226	1.00568	0.98688	0.793395	0.289802	13.4026	0.9947	0.288896	0.984978	-1.69648	5.60013	-0.312765	1.71994
CDK2	Cyclin-dependent kinase 2	P24941	AALAHPFFQDVTKPVPHLRL	279	YES	1	1.25784	0.496224	0.441443	0.304561	0.295498	0.0777465	0.9419	0.347171	1.12892	-1.73685	3.32279	-1.68779	4.37357
DECR1	2	Q16698	VTKEQWDTIEELIR	317	YES	1	1.03417	1.05996	0.948418	0.685899	0.302168	16.042	0.9939	0.156491	1.03153	-1.68219	6.26051	-0.627195	4.12091
CCDC93	Coiled-coil domain-containing protein 93	Q567U6	IHATLLEYGRR	198	YES	1	0.835822	0.610377	0.645755	0.422162	0.529497	0.0280477	0.9088	0.490349	1.00329	-0.837685	1.92565	-1.68013	2.82695
INCENP	Inner centromere protein	Q9NQS7	WLQQEEEERR	650	YES	1	0.709261	0.564556	0.303544	0.22648	0.396696	0.0250796	0.9404	0.292874	0.992863	-0.851371	1.49813	-1.60545	2.35111
NSDHL	Sterol-4-alpha-carboxylate 3-dehydrogenase	Q15738	FFLGDLCSR	80	YES	1	0.929579	1.00966	0.612357	0.532623	0.246114	4.35613	0.9342	0.113188	1.0101	-1.59798	2.42372	-0.615481	1.17877
SDR39U1	Epimerase family protein SDR39U1	Q9NRG7	LETTQLLAK	83	YES	1	0.979829	1.01466	1.0104	0.976531	0.320749	30.3267	0.9981	0.30138	1.00122	-1.59103	6.79981	-0.00909495	0.0367932
FARSA	Phenylalanine--tRNA ligase alpha subunit	Q9Y285	LAQKKPFTPVK	339	YES	1	1.12864	0.8682	0.912415	0.675303	0.284685	70.6009	0.9378	-0.328125	1.02917	-1.56374	3.54088	-0.395921	0.666858
PTGR1	Prostaglandin reductase 1	Q14914	LGFDVVFNYK	185	YES	1	1.20537	0.985074	0.992914	0.70629	0.329121	19.4765	0.9397	0.106362	1.07542	-1.55601	4.23062	-0.682761	2.4326
ACOT1	Acyl-coenzyme A thioesterase 1	Q86TX2	AESTFLFLVGQDDHNWK	314	YES	1	1.03557	0.906805	0.896307	0.836587	0.27678	182.072	0.9701	-0.849517	0.971854	-1.54286	3.47512	-0.321889	0.51381
ECHS1	Enoyl-CoA hydratase	P30084	LFYSTFATDDRKEGMTAFVEK	262	YES	1	0.757806	0.917441	0.973565	0.937403	0.268904	27.5617	0.9071	0.917268	0.268901	-1.52587	2.77995	-0.00862375	0.0116964
NUDT8	Mitochondrial coenzyme A diphosphatase NUDT8	Q8WV74	YTLPVFLHGPHR	166	YES	1	1.00726	0.802164	0.692596	0.683032	0.511601	0.381627	0.9252	0.520393	1.02285	-1.51736	2.26994	-0.873514	2.10107
FARSB	Phenylalanine--tRNA ligase beta subunit	Q9NSD9	GLQVFKER	83	YES	1	1.02593	0.872968	0.784613	0.680067	0.350592	129.949	0.9708	-0.341158	1.01075	-1.51203	3.36672	-0.271428	0.58819
SAC3D1	SAC3 domain-containing protein 1	A6NKF1	AEVASFVADRLR	141	YES	1	1.09261	0.59379	0.35191	0.443248	0.291512	0.0883467	0.9724	0.36228	1.04633	-1.50187	2.10767	-0.974773	1.78289
FARSA	Phenylalanine--tRNA ligase alpha subunit	Q9Y285	FKPAYNPYTEPSMEVFSYHQGLKK	405	YES	1	1.07516	1.06041	1.06791	0.898592	0.34513	16.645	0.9911	0.337971	1.05095	-1.49443	3.63921	-0.473411	0.909061
PTGR1	Prostaglandin reductase 1	Q14914	TGPLPPGPPPEIVIYQELR	248	YES	1	0.864426	1.10342	0.957458	0.641205	0.380112	8.5868	0.9193	0.365927	0.987236	-1.48096	3.68864	-0.436706	1.77509
MCM6	DNA replication licensing factor MCM6	Q14566	ESEDFIVEQYKHLR	589	YES	1	1.09049	0.870124	0.599681	0.541862	0.298791	0.811474	0.9434	0.306853	1.05644	-1.47242	2.66481	-0.658453	1.37947
ERCC6L	DNA excision repair protein ERCC-6-like	Q2NKX8	AAEATNDYETLVKR	1193	YES	1	1.26665	0.301511	0.237395	0.330062	0.257839	0.0597661	0.96	0.275094	1.13333	-1.47096	2.09345	-0.947169	1.01392
SDR39U1	Epimerase family protein SDR39U1	Q9NRG7	WNETFQK	70	YES	1	0.970297	1.00638	1.0151	0.848961	0.325907	13.4649	0.9969	0.325765	0.997947	-1.46706	4.12827	-0.217508	0.943154
HADHA	Trifunctional enzyme subunit alpha	P40939	KTVLGTPEVLLGALPGAGGTQRLPK	166	YES	1	1.10866	1.05666	1.02231	0.924705	0.347555	16.5395	0.9832	0.344882	1.04695	-1.44611	5.14872	-0.235327	1.18773
DCK	Deoxycytidine kinase	P27707	QLCEDWEVVPEPVAR	43	YES	1	1.21533	1.09527	1.0753	0.7825	0.368425	13.1184	0.9506	0.318791	1.10346	-1.4303	3.05004	-0.400753	1.24056
CLUH	Clustered mitochondria protein homolog	O75153	FLENALAVSTK	1126	YES	1	1.04196	1.12872	1.10176	0.809422	0.368735	11.9934	0.9754	0.367413	1.0682	-1.42754	7.41113	-0.310487	2.57158
CCT4	T-complex protein 1 subunit delta	P50991	SIHDALCVIRCLVK	404	YES	1	0.948049	0.963873	0.698126	0.327629	0.304896	1.24938	0.9974	0.304094	0.974707	-1.42638	3.01244	-1.35291	2.69067
ERCC6L	DNA excision repair protein ERCC-6-like	Q2NKX8	ELLMETR	392	YES	1	0.892887	0.844241	0.537278	0.444832	0.272166	0.844778	0.9795	0.220864	0.997121	-1.42407	2.01942	-0.806227	1.2485
OSBPL10	Oxysterol-binding protein-related protein 10	Q9BXB5	KPYNPIIGETFHCSWEVPKDR	477	YES	1	0.986545	0.900624	0.902831	0.850493	0.313479	17.3623	0.9744	0.310723	0.947562	-1.42219	3.81336	-0.101289	0.373605
HADHA	Trifunctional enzyme subunit alpha	P40939	VIIVVKDGPGFYTTR	535	YES	1	1.19861	1.05826	1.02093	0.688484	0.557934	4.41795	0.9306	0.548533	1.08794	-1.39803	2.09264	-0.548578	1.23223
INO80B	INO80 complex subunit B	Q9C086	AWLDEDSNLSPSPLR	121	YES	1	1.03289	0.706346	0.754651	0.50049	0.399381	1.44323	0.9013	0.286118	1.02334	-1.35157	2.75101	-1.45979	1.35703
DNAJC13	DnaJ homolog subfamily C member 13	O75165	ENINQKPVVLRK	736	YES	1	1.01958	1.09741	0.902811	0.329759	0.55168	1.2668	0.9361	0.4407	1.03901	-0.504267	0.915538	-1.34921	2.2504
R3HCC1L	Coiled-coil domain-containing protein R3HCC1L	Q7Z5L2	VLSDSAVGIDLGSTGDTTEALHELR	499	YES	1	0.783601	0.782477	0.711142	0.597277	0.349736	34.2933	0.9478	-0.0509291	0.980121	-1.34247	2.41585	-1.04323	1.54854
RTF2	Replication termination factor 2	Q9BY42	FCFLRCCGCVFSER	134	YES	1	1.14929	0.774718	0.51702	0.539306	0.347699	0.100643	0.9308	0.467954	1.07467	-1.32675	4.36658	-0.933544	2.35472
PDCD2L	Programmed cell death protein 2-like	Q9BRP1	AAVLKPVLLGLR	2	YES	1	1.11741	1.05017	0.904704	0.766014	0.453588	36.0305	0.9635	0.113676	1.06121	-1.31056	5.3682	-0.381958	1.66825
ALDH4A1	Delta-1-pyrroline-5-carboxylate dehydrogenase	P30038	VAKFCYADK	91	YES	1	1.1973	0.992273	0.949688	0.711937	0.50117	7.74742	0.918	0.400808	1.07884	-1.30907	3.04285	-0.63688	2.39527
DOHH	Deoxyhypusine hydroxylase	Q9BU89	LREALLDESRPLFER	161	YES	1	0.888814	0.776568	0.683768	0.346023	0.323787	1.22623	0.9689	0.209152	0.9816	-1.30571	3.05832	-1.29336	2.81873
SRSF5	Serine/arginine-rich splicing factor 5	Q13243	RGFGFVEFEDPRDADDAVYELDGK	37	YES	1	0.917092	0.62655	0.628095	0.456012	0.635741	0.0272484	0.9031	0.570788	1.00111	-1.00606	2.13163	-1.30534	4.98005
DECR1	2	Q16698	LDPTGTFEKEMIGR	252	YES	1	0.839519	0.888197	0.835235	0.704376	0.333661	79.4182	0.9516	-0.160023	0.915815	-1.30293	3.66255	-0.682921	1.74189
PNPLA4	Patatin-like phospholipase domain-containing protein 4	P41247	VLLASSFVPIYAGLK	138	YES	1	1.08186	1.13197	0.927932	0.933458	0.477387	109.684	0.9223	-0.137304	1.04853	-1.28141	4.39844	-0.198338	0.936579
ECHS1	Enoyl-CoA hydratase	P30084	LFYSTFATDDR	262	YES	1	1.01879	1.0344	0.922477	0.841289	0.413771	187.829	0.9873	-0.485833	1.012	-1.27779	7.68881	-0.245234	1.61778
RBM34	RNA-binding protein 34	P42696	SLIPAEGTLSK	218	YES	1	1.0482	1.1057	0.87435	0.702773	0.536294	3.85817	0.9529	0.510057	1.05162	-1.27066	2.12863	-0.770854	1.44075
TUBB4B	Tubulin beta-4B chain	P68371	KEAESCDCLQGFQLTHSLGGGTGSGMGTLLISK	122	YES	1	0.868102	0.948811	0.83384	0.35816	0.552786	1.28723	0.9117	0.455469	0.938977	-0.636932	0.798209	-1.25057	2.7884
ACTR3B	Actin-related protein 3B	Q9P1U1	KFVIDVGYER	266	YES	1	0.817624	0.890169	0.74203	0.519662	0.367282	16.834	0.9546	0.0366046	0.969805	-1.23598	2.52981	-0.723994	1.20511
MCM6	DNA replication licensing factor MCM6	Q14566	RYLLFAR	574	YES	1	0.95903	1.00286	1.01422	0.780992	0.43365	11.1752	0.9933	0.433613	0.994031	-1.23154	3.37038	-0.133351	0.316178
SUPT6H	Transcription elongation factor SPT6	Q7KZ85	TSFDDRLEDDDFDLIEENLGVK	90	YES	1	1.21152	0.761538	0.550065	0.39763	0.45826	0.0966723	0.9346	0.468646	1.10576	-1.23056	4.19287	-1.12431	3.75169
PDCD2L	Programmed cell death protein 2-like	Q9BRP1	IAACQEQILR	257	YES	1	0.944748	0.904136	0.950069	0.83598	0.43953	20.4811	0.9782	0.411522	0.950264	-1.22651	6.42617	-0.240609	2.14077
CAMK2B	Calcium/calmodulin-dependent protein kinase type II subunit beta	Q13554	NLINQMLTINPAKR	247	YES	1	0.976499	1.01101	1.07951	1.02617	0.386806	34.4012	0.9823	0.381957	1.01908	-1.21362	3.95329	-0.154765	0.465636
ZBTB11	Zinc finger and BTB domain-containing protein 11	O95625	YLTNEREPYAPGTEGNVK	13	YES	1	0.875328	0.927096	0.903159	0.96161	0.387576	25.8562	0.9629	0.387577	0.933447	-1.20499	3.43776	-0.121259	0.359804
PCNT	Pericentrin	O95613	TVNDWTSSNEK	3000	YES	1	1.16628	0.657562	0.598783	0.508329	0.473057	0.079206	0.9445	0.52672	1.08311	-1.19992	2.46333	-0.719481	1.39813
RBP1	Retinol-binding protein 1	P09455	MLVNENFEEYLR	11	YES	1	0.900151	0.95883	0.875227	0.876449	0.382067	23.7943	0.9626	0.36695	0.933786	-1.18997	4.84105	-0.165298	0.748276
FARSA	Phenylalanine--tRNA ligase alpha subunit	Q9Y285	YFSIDRVFR	350	YES	1	1.0043	1.03022	0.920622	0.731633	0.449812	17.8964	0.9941	0.290287	1.01389	-1.18979	3.27416	-0.261571	0.636394
SERPINH1	Serpin H1	P50454	TGLYNYYDDEKEKLQIVEMPLAHK	240	YES	1	1.00163	1.14626	1.16577	0.909939	0.448912	13.968	0.9291	0.447253	1.07836	-1.18165	7.08423	-0.166138	1.20972
SULT2B1	Sulfotransferase 2B1	O00204	AKVIYMGR	140	YES	1	0.865701	0.826565	0.938913	0.901415	0.35804	27.6182	0.9336	0.356074	0.907781	-1.18125	2.74441	0.0763113	0.147544
SERPINH1	Serpin H1	P50454	KAVAISLPK	300	YES	1	0.971947	0.917014	0.993802	0.815382	0.444049	12.38	0.9813	0.443942	0.970693	-1.17778	7.45258	-0.244004	2.77997
DTYMK	Thymidylate kinase	P23919	STEIGKLLSSYLQKK	46	YES	1	0.997002	0.628145	0.325319	0.518016	0.509738	0.0858601	0.9383	0.451025	0.998509	-1.17446	2.01889	-0.712516	1.61761
OSBPL10	Oxysterol-binding protein-related protein 10	Q9BXB5	HNPTNTIVCK	645	YES	1	1.13483	0.980316	0.997861	0.800475	0.435226	40.753	0.9562	0.117575	1.04625	-1.16924	5.17215	-0.321123	1.34707
HADHA	Trifunctional enzyme subunit alpha	P40939	DTSASAVAVGLKQGK	520	YES	1	1.07869	0.94463	0.856634	0.806042	0.463466	162.796	0.9449	-0.201129	1.0198	-1.15888	4.73183	-0.211361	0.683844
BRD4	Bromodomain-containing protein 4	O60885	LMFSNCYK	424	YES	1	0.900318	1.03317	0.976111	0.846756	0.510741	15.4202	0.9483	0.503462	0.97767	-1.15211	4.48943	-0.286392	0.926191
SNAPC4	snRNA-activating protein complex subunit 4	Q5SXM2	WNLKEEEQLIELIEK	456	YES	1	0.856747	0.494852	0.454552	0.382353	0.413832	0.024365	0.9933	0.413501	1.00082	-0.894488	1.37145	-1.14494	2.34893
SDR39U1	Epimerase family protein SDR39U1	Q9NRG7	GHEVTLVSR	24	YES	1	1.08103	0.957357	0.947837	1.01361	0.451516	29.5871	0.9569	0.451496	0.999981	-1.13923	5.7006	0.0201197	0.0800734
MARK3	MAP/microtubule affinity-regulating kinase 3	P27448	YSDHAGPAIPSVVAYPKR	418	YES	1	0.863305	0.589986	0.420772	0.37438	0.475768	0.0375307	0.9815	0.417072	0.996804	-0.736365	1.13315	-1.13462	2.76504
DECR1	2	Q16698	EQWDTIEELIR	320	YES	1	1.12822	1.10043	0.989539	0.786022	0.545816	10.6678	0.9584	0.470452	1.0757	-1.13297	3.62061	-0.51564	2.1909
SERPINH1	Serpin H1	P50454	LSSLIILMPHHVEPLER	264	YES	1	0.85407	0.975612	0.984831	0.790738	0.466092	11.8933	0.9348	0.46595	0.953665	-1.13102	7.55824	-0.298726	4.40491
SERPINH1	Serpin H1	P50454	TGLYNYYDDEKEK	240	YES	1	0.969168	1.03309	0.991504	0.816032	0.437093	16.7007	0.992	0.403313	1.00026	-1.12942	7.89129	-0.267564	4.4582
GTPBP4	GTP-binding protein 4	Q9BZE4	ITVVPSAK	9	YES	1	0.843867	0.652666	0.658346	0.50518	0.609211	0.0190783	0.9327	0.575482	1.00152	-1.11738	2.13952	-0.941684	1.79296
SEPHS2	Selenide	Q99611	NEVSFVIHNLPIIAK	335	YES	1	0.850954	0.815161	0.665964	0.599304	0.472326	6.1706	0.99	0.213017	0.999205	-1.11338	4.47337	-0.579482	2.38245
FARSA	Phenylalanine--tRNA ligase alpha subunit	Q9Y285	VNLQMVYDSPLCR	482	YES	1	0.952382	1.08529	1.03282	0.871675	0.481515	13.9206	0.961	0.480042	1.01766	-1.11122	6.30831	-0.141687	1.21476
SERPINH1	Serpin H1	P50454	LSSLIILMPHHVEPLERLEK	264	YES	1	1.04804	1.07281	1.14439	0.833271	0.536166	10.7215	0.9563	0.53586	1.06631	-1.1055	4.66995	-0.248479	1.17015
SDR39U1	Epimerase family protein SDR39U1	Q9NRG7	ITWDELAASGLPSCDAAVNLAGENILNPLRR	39	YES	1	0.889697	0.825139	0.903569	0.808986	0.471033	15.9813	0.9058	0.468029	0.904671	-1.10375	2.41434	-0.25372	0.471994
SERPINH1	Serpin H1	P50454	LFYADHPFIFLVR	381	YES	1	0.978296	0.957984	0.917702	0.843361	0.41907	87.0189	0.9912	-0.0690713	0.972766	-1.07634	4.03998	-0.187046	0.930581
RBM42	RNA-binding protein 42	Q9BTD8	TAAGSSWEDPSLLEWDADDFR	362	YES	1	1.1871	1.00813	0.803457	0.637173	0.585861	0.74086	0.9291	0.592158	1.08741	-1.07058	2.82054	-0.706885	2.08376
ECHS1	Enoyl-CoA hydratase	P30084	KLFYSTFATDDRK	261	YES	1	1.00945	1.03086	0.966828	0.88618	0.507538	119.273	0.9942	-0.0696821	1.00962	-1.06811	7.1696	-0.165856	1.54942
SUPT5H	Transcription elongation factor SPT5	O00267	SSDGEEAEVDEER	18	YES	1	0.776252	0.448484	0.558986	0.478988	0.429145	0.0106618	0.962	0.478896	1	-1.15889	1.79659	-1.05874	2.29906
ECHS1	Enoyl-CoA hydratase	P30084	EGMTAFVEKR	274	YES	1	1.03379	1.02205	0.962719	0.934769	0.46494	129.467	0.9898	-0.245683	1.0084	-1.05536	6.64275	-0.166102	1.81677
MCM2	DNA replication licensing factor MCM2	P49736	FVVGSHVR	678	YES	1	1.10052	1.05028	1.01052	0.95316	0.517824	18.9571	0.9723	0.510083	1.04051	-1.05146	6.57682	-0.161845	1.12592
LASP1	LIM and SH3 domain protein 1	Q14847	MNPNCARCGK	1	YES	1	0.803386	0.814042	0.692275	0.622751	0.4389	22.4221	0.9669	0.0952263	0.991157	-1.04995	4.53371	-0.677213	2.78795
PIK3R2	Phosphatidylinositol 3-kinase regulatory subunit beta	O00459	IAEIHESR	532	YES	1	1.20524	0.754196	0.542651	0.48427	0.519786	0.0923138	0.9478	0.515568	1.10262	-0.890003	1.73989	-1.04646	2.44715
CLUH	Clustered mitochondria protein homolog	O75153	NFAVLQK	296	YES	1	1.04214	0.872736	0.974526	0.755311	0.557859	9.72342	0.9074	0.557688	0.972402	-1.04438	2.68361	-1.24361	0.831282
FARSA	Phenylalanine--tRNA ligase alpha subunit	Q9Y285	YGINNIR	469	YES	1	1.06314	1.04295	0.932561	0.840419	0.491226	103.064	0.9789	-0.053995	1.03289	-1.04151	7.48207	-0.190299	2.18305
SULT2B1	Sulfotransferase 2B1	O00204	GEVQFGSWFDHIK	182	YES	1	1.00257	0.942944	0.867198	0.885198	0.504912	151.28	0.9411	-0.130043	0.964778	-1.03651	4.67151	-0.168063	0.943677
SERPINH1	Serpin H1	P50454	DTQSGSLLFIGR	394	YES	1	1.03004	1.01436	1.0037	0.823033	0.511978	14.8678	0.9978	0.480828	1.01471	-1.03186	8.31988	-0.274336	2.97211
MVK	Mevalonate kinase	Q03426	VALAVSLNLR	27	YES	1	1.1567	1.07839	1.00414	1.08826	0.499011	32.7501	0.94	0.498792	1.06552	-1.02414	2.07547	0.0106767	0.0146935
CES2	Cocaine esterase	O00748	ADHGDELPFVFR	455	YES	1	1.02148	0.963929	0.917982	0.812302	0.537046	107.687	0.9917	0.0598433	1.00333	-1.01647	5.37974	-0.410054	2.77917
SFSWAP	Splicing factor	Q12872	KAALFLQTLK	686	YES	1	0.784772	0.671683	0.679641	0.574563	0.385689	20.1884	0.9593	0.00175028	0.996734	-1.01093	2.19298	-0.512381	1.01871
FARSA	Phenylalanine--tRNA ligase alpha subunit	Q9Y285	LDAEPRPPPTQEAA	495	YES	1	1.05137	1.0607	0.974255	0.865216	0.515184	83.3114	0.9852	0.060621	1.03479	-1.01017	8.08392	-0.204504	2.96861
YARS1	Tyrosine--tRNA ligase	P54577	FIKGTDYQLSK	117	YES	1	1.09012	0.921551	0.932962	0.87517	0.556681	120.842	0.9105	0.063273	1.00516	-1.0049	3.96545	-0.218204	1.1783
HADHA	Trifunctional enzyme subunit alpha	P40939	HLAILGAGLMGAGIAQVSVDKGLK	363	YES	1	0.929868	0.964229	0.927294	0.840911	0.425147	81.7771	0.9877	-0.020357	0.961491	-0.998896	3.00581	-0.0407778	0.081023
PLEKHF2	Pleckstrin homology domain-containing family F member 2	Q9H8W4	VLIGEGVLTKLCR	35	YES	1	0.858226	0.79265	0.723807	0.476799	0.503008	0.660066	0.9496	0.389201	0.990598	-1.02913	4.69712	-0.997903	5.34461
HEATR3	HEAT repeat-containing protein 3	Q7Z4Q2	TAFPNSIAVDLCSRNPTWKPLIR	435	YES	1	1.04684	0.953705	1.01156	0.962517	0.493283	19.0909	0.9794	0.492327	1.00303	-0.997346	3.08266	-0.226952	0.835385
PDCD2L	Programmed cell death protein 2-like	Q9BRP1	SQCLQVPER	98	YES	1	0.918971	0.946522	0.959005	0.843997	0.501269	16.5438	0.9799	0.493473	0.956323	-0.996481	4.60099	-0.234578	1.12563
SCP2	Sterol carrier protein 2	P22307	GSVLPNSDKKADCTITMADSDFLALMTGK	483	YES	1	1.011	1.02278	0.855155	0.654023	0.546931	2.49459	0.9922	0.535512	1.01761	-0.986562	2.01249	-0.390302	1.26662
HADHA	Trifunctional enzyme subunit alpha	P40939	TSKDTSASAVAVGLK	517	YES	1	0.908861	0.96726	0.96833	0.78832	0.510867	11.3821	0.9748	0.510709	0.961136	-0.979679	6.31033	-0.281732	2.39027
ECHS1	Enoyl-CoA hydratase	P30084	EGMTAFVEK	274	YES	1	1.08376	1.12812	1.05409	1.02099	0.496159	19.8469	0.9682	0.494389	1.0665	-0.97708	3.87957	-0.0912799	0.377433
ACOT1	Acyl-coenzyme A thioesterase 1	Q86TX2	GALFQAHAR	43	YES	1	1.12285	1.118	1.02566	1.0084	0.498542	16.6514	0.9563	0.498249	1.06659	-0.976147	3.27425	-0.0178155	0.0660098
ACOT1	Acyl-coenzyme A thioesterase 1	Q86TX2	SFIPVER	307	YES	1	0.996388	1.02474	0.986869	0.918325	0.500682	96.9648	0.997	0.012487	1.00477	-0.973012	8.83296	-0.117709	2.43562
CAMK2G	Calcium/calmodulin-dependent protein kinase type II subunit gamma	Q13555	ITADQALKHPWVCQR	261	YES	1	1.06233	1.07581	1.00908	0.964038	0.584083	16.8421	0.9745	0.582672	1.0367	-0.97053	3.68955	-0.128953	0.786988
MCM6	DNA replication licensing factor MCM6	Q14566	VFEMSQDK	337	YES	1	1.01843	0.98605	0.88895	0.997916	0.47279	34.1454	0.953	0.472669	0.978278	-0.969948	4.05595	-0.0371364	0.143515
MTA1	Metastasis-associated protein MTA1	Q13330	RMNWIDAPDDVFYMATEETR	647	YES	1	0.908694	0.922244	0.879243	0.989394	0.485502	29.5423	0.9398	0.485497	0.93992	-0.958973	2.39892	-0.239086	0.676666
HADHA	Trifunctional enzyme subunit alpha	P40939	TVLGTPEVLLGALPGAGGTQRLPK	167	YES	1	1.01575	0.998074	0.96488	0.848392	0.540682	79.7662	0.9989	0.144726	1.0066	-0.957304	7.59988	-0.243654	2.63751
BRCC3	Lys-63-specific deubiquitinase BRCC36	P46736	DRVEISPEQLSAASTEAER	88	YES	1	1.1878	0.651774	0.550651	0.442894	0.406177	0.0834252	0.9427	0.466574	1.09391	-0.955584	2.08407	-0.871207	1.5647
HADHA	Trifunctional enzyme subunit alpha	P40939	ALMGLYHGQVLCKK	338	YES	1	0.981716	0.985838	0.919389	0.886296	0.563436	103.717	0.982	0.138022	0.980739	-0.945202	4.44591	-0.255914	1.51784
HADHA	Trifunctional enzyme subunit alpha	P40939	TILKDATLTALDRGQQQVFK	387	YES	1	1.03725	1.02777	1.0735	1.04522	0.584946	39.9337	0.9834	0.579322	1.03687	-0.943017	4.41774	-0.0587939	0.251714
DMXL2	DmX-like protein 2	Q8TDJ6	VINLSQYGPAYFGQEHAR	1495	YES	1	0.959198	0.676642	0.475473	0.633463	0.639867	0.0475638	0.9149	0.583845	0.99252	-0.666405	1.21274	-0.939714	2.55813
HADHA	Trifunctional enzyme subunit alpha	P40939	MQLLEIITTEKTSK	506	YES	1	0.900141	0.939164	1.00993	0.942344	0.533045	26.4134	0.9492	0.526418	0.962288	-0.939009	3.85369	-0.0499838	0.173088
SERPINH1	Serpin H1	P50454	GVVEVTHDLQK	309	YES	1	1.07131	1.02733	1.00084	0.888168	0.523626	12.9429	0.9837	0.523419	1.02488	-0.933569	6.87843	-0.183016	1.917
YARS1	Tyrosine--tRNA ligase	P54577	AMLESIGVPLEK	103	YES	1	1.03654	1.00521	1.06248	0.989939	0.536874	23.5673	0.9871	0.530214	1.02603	-0.928463	6.00178	-0.115267	0.671859
MCM6	DNA replication licensing factor MCM6	Q14566	DQVAIHEAMEQQTISITK	469	YES	1	0.920558	0.986003	0.95955	0.825856	0.484435	20.3341	0.9811	0.434194	0.968448	-0.926606	5.31652	-0.175548	1.19857
YARS1	Tyrosine--tRNA ligase	P54577	IYWGTATTGKPHVAYFVPMSK	38	YES	1	1.01577	1.04731	1.10643	1.14167	0.57595	62.2986	0.9312	0.51204	1.06227	-0.925327	3.48484	0.0729855	0.194768
EIF3A	Eukaryotic translation initiation factor 3 subunit A	Q14152	DIDIEDLEELDPDFIMAK	655	YES	1	1.35556	0.804042	0.389267	0.397178	0.432812	0.101247	0.9181	0.406416	1.17779	-0.922865	2.16783	-1.04588	1.76803
DOHH	Deoxyhypusine hydroxylase	Q9BU89	RLEWLQQHGGEPAAGPYLSVDPAPPAEER	128	YES	1	1.1447	1.10634	0.932961	0.518081	0.580561	1.20721	0.9633	0.549314	1.08368	-0.728665	4.00201	-0.920127	4.29946
MCM4	DNA replication licensing factor MCM4	P33991	TTIENIQLPHTLLSR	629	YES	1	0.888653	0.96129	0.953953	0.820945	0.526156	13.6349	0.958	0.524036	0.95108	-0.916377	7.16048	-0.273246	2.78829
MAP2K3	Dual specificity mitogen-activated protein kinase kinase 3	P46734	NFEVEADDLVTISELGR	56	YES	1	0.922528	0.677552	0.696245	0.64123	0.558335	0.0268221	0.9376	0.627931	1.00204	-0.915704	2.85523	-0.382834	1.17953
TES	Testin	Q9UGI8	MGLGHEQGFGAPCLKCK	10	YES	1	0.9164	0.822525	0.664249	0.502635	0.424856	0.774087	0.9995	0.360761	0.997342	-1.0881	3.68681	-0.913121	5.10738
YARS1	Tyrosine--tRNA ligase	P54577	NLQEVLGEEKLKEILK	17	YES	1	0.925337	1.04272	0.93987	0.863402	0.465369	79.211	0.9629	0.0471634	0.983097	-0.909827	2.35062	-0.23915	0.667973
HADHA	Trifunctional enzyme subunit alpha	P40939	VIGMHYFSPVDK	494	YES	1	0.954636	1.15542	1.02413	1.01387	0.523349	17.868	0.9056	0.523347	1.03381	-0.907006	3.43604	0.0248068	0.0723058
HADHA	Trifunctional enzyme subunit alpha	P40939	HVAEDLGKVFGER	598	YES	1	1.00191	0.961488	0.949099	0.895321	0.54876	101.841	0.9897	0.1087	0.983411	-0.904158	6.7272	-0.10754	1.10209
DNAH2	Dynein axonemal heavy chain 2	Q9P225	KAVDLYMLFNSELALVNR	511	YES	1	0.970267	0.874354	0.927262	0.913406	0.465025	30.5968	0.9542	0.43948	0.94304	-0.901836	2.24571	0.14242	0.24584
SULT2B1	Sulfotransferase 2B1	O00204	EGDPSWIR	86	YES	1	1.10844	1.09086	1.03113	1.0814	0.616308	34.536	0.9531	0.616071	1.06238	-0.900199	3.7843	0.0198149	0.0840437
G3BP2	Ras GTPase-activating protein-binding protein 2	Q9UN86	ERPGFPPRGPRPGR	298	YES	1	0.973557	0.43317	0.540117	0.501166	0.519548	0.012822	0.9801	0.498504	1.00003	-0.934397	2.07511	-0.899952	2.23045
OSBPL10	Oxysterol-binding protein-related protein 10	Q9BXB5	LLEHGEEYVFTLPSAYAR	580	YES	1	1.03326	0.988509	0.915167	0.898737	0.571242	140.953	0.9641	0.0339239	0.997741	-0.898531	6.24156	-0.176214	1.65539
HADHA	Trifunctional enzyme subunit alpha	P40939	TILKDATLTALDR	387	YES	1	0.993874	1.03843	1.09949	0.988928	0.581202	20.3188	0.9589	0.578196	1.033	-0.896543	4.8078	-0.0780898	0.468736
LLGL2	LLGL scribble cell polarity complex component 2	Q6P1M3	LVAFGTSHGFGLFDHQQRR	602	YES	1	1.1123	0.496175	0.387088	0.375084	0.529469	0.0676133	0.9594	0.430534	1.05615	-0.895604	2.81007	-1.11666	2.03452
DHX15	ATP-dependent RNA helicase DHX15	O43143	IIPLYSTLPPQQQQR	385	YES	1	0.932802	0.701995	0.586212	0.630942	0.551881	0.0430346	0.9817	0.58611	0.999446	-0.763412	2.57139	-0.893786	3.61001
CLUH	Clustered mitochondria protein homolog	O75153	LHYIMGDYAEALSNQQK	1029	YES	1	1.09116	1.10961	1.05705	0.834138	0.608177	10.0523	0.9636	0.599195	1.06676	-0.891133	2.78536	-0.160988	0.776899
SPAST	Spastin	Q9UBP0	NVDSNLANLIMNEIVDNGTAVK	319	YES	1	1.08373	0.897254	0.747667	0.478141	0.526933	0.670024	0.958	0.485326	1.03278	-0.604508	1.0371	-0.876024	2.41662
FARSA	Phenylalanine--tRNA ligase alpha subunit	Q9Y285	LGITQLR	398	YES	1	1.12239	1.111	1.0628	1.00413	0.553077	15.1612	0.9591	0.552994	1.07403	-0.872302	5.23321	-0.132169	0.685324
HADHA	Trifunctional enzyme subunit alpha	P40939	ELHSEFSEVMNEIWASDQIR	67	YES	1	1.13665	1.09332	0.999235	0.90475	0.611435	58.5833	0.935	0.29512	1.07285	-0.866912	3.02124	-0.0686445	0.396547
MCM4	DNA replication licensing factor MCM4	P33991	AEINILLCGDPGTSK	502	YES	1	1.02955	0.907108	0.857806	0.778972	0.583793	81.4271	0.9631	0.202255	1.0131	-0.866252	6.08797	-0.337839	3.0746
SULT2B1	Sulfotransferase 2B1	O00204	DDDIFIITYPK	60	YES	1	0.987026	0.969702	0.863658	0.97971	0.464874	40.3796	0.9441	0.464409	0.960019	-0.861535	2.12541	0.0159003	0.0292553
MCM4	DNA replication licensing factor MCM4	P33991	QLVLQTGALVLSDNGICCIDEFDKMNESTR	555	YES	1	0.844799	1.00051	0.940885	0.704185	0.434786	10.6898	0.9334	0.427468	0.947975	-0.860485	2.18403	-0.920003	1.07403
ECHS1	Enoyl-CoA hydratase	P30084	LFYSTFATDDRK	262	YES	1	1.04651	1.00884	0.998602	0.956561	0.552092	46.0508	0.9916	0.40349	1.01439	-0.858988	8.81097	-0.0897618	1.60292
FARSB	Phenylalanine--tRNA ligase beta subunit	Q9NSD9	IDVPANRYDLLCLEGLVR	65	YES	1	1.05034	1.0586	0.948447	0.877716	0.584453	116.692	0.9716	0.0960259	1.03222	-0.857593	5.74675	-0.196042	1.11791
ANKHD1	Ankyrin repeat and KH domain-containing protein 1	Q8IWZ3	RLTSSVSCALDEAAAALTR	174	YES	1	0.703881	0.586486	0.548482	0.535128	0.493892	0.00388035	0.996	0.504911	1.00025	-0.780291	2.38208	-0.857586	2.54708
SERPINH1	Serpin H1	P50454	AVAISLPK	301	YES	1	1.04437	1.01987	0.96994	0.874224	0.58304	81.027	0.9909	0.207042	1.02103	-0.857496	6.74961	-0.21978	2.39475
GAK	Cyclin-G-associated kinase	O14976	TPEIIDLYSNFPIGEK	228	YES	1	1.12191	1.03666	1.04349	0.769984	0.650712	6.40165	0.9538	0.648813	1.05339	-0.850834	2.53311	-0.575027	1.97495
EIF3A	Eukaryotic translation initiation factor 3 subunit A	Q14152	AFKDIDIEDLEELDPDFIMAK	652	YES	1	0.934131	0.883513	0.659951	0.545765	0.677325	0.227322	0.9336	0.612091	0.971287	-0.500943	1.08597	-0.847953	2.94891
SERPINH1	Serpin H1	P50454	HLAGLGLTEAIDKNK	320	YES	1	1.00012	0.957917	1.02341	0.843155	0.540044	11.6628	0.987	0.540014	0.995363	-0.846219	8.43119	-0.259892	4.54206
HADHA	Trifunctional enzyme subunit alpha	P40939	NKFGAPQKDVK	352	YES	1	0.961602	0.993594	0.939942	0.89335	0.560215	91.1498	0.9874	0.177339	0.978868	-0.844154	3.7732	-0.154651	0.5852
YARS1	Tyrosine--tRNA ligase	P54577	HVLFPLK	266	YES	1	0.91263	0.946414	0.947988	0.912971	0.587261	15.7308	0.9649	0.587199	0.951758	-0.841092	4.36805	-0.0676025	0.533931
CPSF1	Cleavage and polyadenylation specificity factor subunit 1	Q10570	IFLWSLR	1190	YES	1	1.01966	0.944912	1.02332	0.944102	0.533611	19.4906	0.9778	0.530619	0.996965	-0.837665	2.29314	-0.225258	0.601161
RAN	GTP-binding nuclear protein Ran	P62826	DLVRVCENIPIVLCGNKVDIK	107	YES	1	0.892285	0.885844	0.797168	0.514473	0.541164	1.22437	0.957	0.527731	0.926068	-1.02888	2.78471	-0.835747	3.70191
ACOT1	Acyl-coenzyme A thioesterase 1	Q86TX2	SEFYANEACKR	331	YES	1	0.898648	1.04242	1.00669	0.929799	0.585251	17.1146	0.9189	0.584166	0.986937	-0.834042	3.85306	-0.0685154	0.347602
ACOT1	Acyl-coenzyme A thioesterase 1	Q86TX2	ASLHALVGSPIIWGGEPR	372	YES	1	1.10714	1.0501	1.024	0.988225	0.602265	14.6976	0.9613	0.602232	1.04531	-0.831759	5.379	-0.124573	0.622566
MCM6	DNA replication licensing factor MCM6	Q14566	LSEAMAR	627	YES	1	0.925797	0.953138	0.94747	0.887241	0.557859	19.8026	0.9776	0.548509	0.956712	-0.831299	3.30731	-0.0329749	0.0795322
YARS1	Tyrosine--tRNA ligase	P54577	APWELLELR	85	YES	1	1.03089	1.10985	1.04616	0.951116	0.571562	15.1505	0.9657	0.570683	1.04676	-0.826884	5.76413	-0.0664141	0.318583
NAP1L1	Nucleosome assembly protein 1-like 1	P55209	FEIINAIYEPTEEECEWKPDEEDEISEELKEK	118	YES	1	0.99273	0.753638	0.6781	0.438174	0.472149	0.282588	0.9562	0.431706	1.01614	-0.823025	2.54399	-0.971263	2.45829
AP3D1	AP-3 complex subunit delta-1	O14617	NYLSLAPLFFK	217	YES	1	0.749133	0.776851	0.55435	0.491597	0.465762	0.149518	0.9494	0.360076	0.995879	-0.87026	1.41643	-0.82297	2.14547
MCM6	DNA replication licensing factor MCM6	Q14566	ASSAAGLTAAVVR	423	YES	1	0.950208	0.963332	0.949835	0.893682	0.526152	75.1306	0.9905	0.202394	0.968323	-0.820772	5.41762	-0.120434	0.683058
MVK	Mevalonate kinase	Q03426	MIHGNPSGVDNAVSTWGGALR	195	YES	1	1.0097	1.12357	1.04585	0.991658	0.646785	18.6028	0.9309	0.644327	1.04479	-0.820692	3.54649	-0.0921069	0.568427
FARSB	Phenylalanine--tRNA ligase beta subunit	Q9NSD9	AAGASDVVLYK	54	YES	1	1.07569	1.06736	1.01061	0.914565	0.581505	20.0418	0.9755	0.540817	1.04048	-0.813069	5.93114	-0.179526	1.48393
POLR1C	DNA-directed RNA polymerases I and III subunit RPAC1	O15160	EIFRNEK	286	YES	1	0.986371	1.12321	1.04426	0.756403	0.571627	8.97563	0.947	0.571591	1.03848	-0.808925	2.65037	-0.367883	0.8973
GFER	FAD-linked sulfhydryl oxidase ALR	P55789	GRFHGGNLFFLPGGAR	8	YES	1	0.793257	0.738521	0.711086	0.725954	0.632862	0.419384	0.9698	0.464936	1.00026	-0.804015	2.01299	-0.612668	1.45514
VPS52	Vacuolar protein sorting-associated protein 52 homolog	Q8N1B4	GEQRYPFEALFR	372	YES	1	0.877529	0.733285	0.661876	0.581182	0.461327	0.996364	0.9878	0.321559	1.00343	-1.00801	1.54494	-0.801009	2.00564
SERPINH1	Serpin H1	P50454	HLAGLGLTEAIDKNKADLSR	320	YES	1	0.969299	0.980121	0.97761	0.78802	0.556606	11.2255	0.9969	0.548032	0.983209	-0.794825	6.64083	-0.3097	4.31942
HADHA	Trifunctional enzyme subunit alpha	P40939	DATLTALDRGQQQVFK	391	YES	1	0.976959	1.00107	0.96385	0.893843	0.572747	102.659	0.9959	0.146146	0.990583	-0.793979	5.48931	-0.127776	0.952541
EIF3D	Eukaryotic translation initiation factor 3 subunit D	O15371	AKFMTPVIQDNPSGWGPCAVPEQFR	2	YES	1	0.921675	0.941797	1.02897	1.03315	0.496993	105.957	0.9504	-0.138537	0.985123	-0.791088	2.78413	0.0375516	0.11123
CAMK2B	Calcium/calmodulin-dependent protein kinase type II subunit beta	Q13554	DLKPENLLLASK	136	YES	1	1.00136	0.966804	1.03357	0.870393	0.575502	12.0417	0.985	0.575463	1.00043	-0.790435	6.36056	-0.197958	2.18573
HADHA	Trifunctional enzyme subunit alpha	P40939	TLQEVTQLSQEAQR	112	YES	1	1.01528	1.00918	0.961716	0.96285	0.588918	35.3622	0.9875	0.535695	0.99692	-0.786158	7.68664	-0.0776016	0.855596
AAR2	Protein AAR2 homolog	Q9Y312	AAVQMDPELAK	2	YES	1	1.0279	1.04834	0.999107	0.71977	0.579824	6.21689	0.9937	0.574084	1.0252	-0.785219	4.2145	-0.462979	2.81243
FARSB	Phenylalanine--tRNA ligase beta subunit	Q9NSD9	DLLFQALGR	9	YES	1	1.12018	1.087	1.03114	0.915622	0.594289	22.534	0.9554	0.512508	1.06456	-0.780801	6.19883	-0.144543	1.04437
RNF40	E3 ubiquitin-protein ligase BRE1B	O75150	KVEVYADADEILQEEIKEYK	924	YES	1	0.876387	0.814327	0.707239	0.537294	0.590238	0.20719	0.9596	0.530603	0.991688	-0.572658	1.3797	-0.777672	4.45443
UBXN7	UBX domain-containing protein 7	O94888	SIFDGFRDFQTETIR	106	YES	1	0.847257	0.768872	0.821289	0.705242	0.729101	0.0151649	0.9067	0.663302	1.00011	-0.929074	1.41938	-0.776411	2.12948
CLUH	Clustered mitochondria protein homolog	O75153	AVLMSER	1046	YES	1	1.04776	0.9738	0.970772	0.909433	0.579533	96.4771	0.9783	0.169897	1.00412	-0.772594	4.07424	-0.151852	0.947006
PFKL	ATP-dependent 6-phosphofructokinase	P17858	SEWGSLLEELVAEGK	130	YES	1	1.05519	1.03357	0.915256	0.931381	0.64893	135.923	0.9197	0.2087	1.01676	-0.771538	2.12185	-0.0722598	0.278031
PSMB3	Proteasome subunit beta type-3	P49720	RFGPYYTEPVIAGLDPK	99	YES	1	0.922782	0.736019	0.748143	0.665171	0.582944	0.214681	0.9371	0.544009	1.0058	-0.77149	2.55181	-0.589267	1.59116
MCM6	DNA replication licensing factor MCM6	Q14566	IEESIDR	559	YES	1	0.97001	0.911958	0.877317	0.88173	0.568528	74.1413	0.9301	0.289286	0.946665	-0.770976	4.75019	-0.233269	2.8434
SUGP1	SURP and G-patch domain-containing protein 1	Q8IWZ8	EWAEQLTK	510	YES	1	1.03956	0.733086	0.642052	0.584337	0.509658	0.0851964	0.9606	0.578664	1.01983	-0.768327	2.03946	-0.57041	1.319
MCM4	DNA replication licensing factor MCM4	P33991	SQLLQYVYNLVPR	517	YES	1	1.03693	0.963337	0.895726	0.92032	0.590901	80.0237	0.9228	0.280835	0.981278	-0.767929	5.91411	-0.203014	1.87395
HADHA	Trifunctional enzyme subunit alpha	P40939	GLYPAPLK	296	YES	1	1.05364	0.995579	0.971402	0.961172	0.620458	83.1165	0.9723	0.311301	1.00719	-0.767235	6.07464	-0.0705881	0.543318
PKM	Pyruvate kinase PKM	P14618	NICKVVEVGSK	163	YES	1	1.13801	1.097	0.944598	0.713043	0.667621	1.71846	0.9451	0.672595	1.07992	-0.767087	3.5407	-0.494261	3.18217
HADHA	Trifunctional enzyme subunit alpha	P40939	TVLGTPEVLLGALPGAGGTQR	167	YES	1	1.11826	1.02608	0.997864	0.87393	0.618133	48.1457	0.9502	0.353908	1.05129	-0.766658	6.56904	-0.175049	1.12477
HADHA	Trifunctional enzyme subunit alpha	P40939	DTSASAVAVGLK	520	YES	1	1.00172	0.979269	0.981118	0.934626	0.584919	60.9594	0.9972	0.366901	0.991747	-0.764327	7.07712	-0.0981772	1.23915
HADHA	Trifunctional enzyme subunit alpha	P40939	IVEKLEK	126	YES	1	1.05479	1.131	0.976028	0.975949	0.629197	89.721	0.9105	0.256116	1.04571	-0.762755	5.16739	-0.1069	0.706547
MCM6	DNA replication licensing factor MCM6	Q14566	LVFLACCVAPTNPR	296	YES	1	1.08757	1.08992	0.986939	0.987407	0.593115	124.259	0.9492	0.0261047	1.04482	-0.761803	5.85774	-0.0795371	0.642546
ECHS1	Enoyl-CoA hydratase	P30084	NNTVGLIQLNRPK	44	YES	1	0.984034	0.999776	0.976599	0.9667	0.559748	24.4578	0.9973	0.555027	0.990113	-0.759764	5.75041	-0.0550544	0.390738
SULT2B1	Sulfotransferase 2B1	O00204	DPGTPDQFLR	168	YES	1	1.01384	1.10656	1.13209	1.04304	0.641916	23.7978	0.9176	0.638827	1.06328	-0.759654	4.70132	-0.0207713	0.108899
PIK3CB	Phosphatidylinositol 4	P42338	EYAVGCLR	621	YES	1	0.944192	0.872504	0.959821	0.573627	0.604013	3.38246	0.9494	0.588782	0.944142	-0.756676	2.39689	-0.528335	1.23148
AURKA	Aurora kinase A	O14965	EVEIQSHLR	181	YES	1	1.07678	1.08709	0.800372	0.817828	0.698943	0.723775	0.9123	0.758384	1.05463	-0.756397	2.28257	-0.287136	0.852293
RSBN1L	Lysine-specific demethylase RSBN1L	Q6PCB5	QTTAAVGVLK	582	YES	1	1.08157	0.950967	0.948921	0.872685	0.69995	66.9728	0.9106	0.442227	1.02393	-0.755348	2.20706	-0.239095	0.700332
XRCC5	X-ray repair cross-complementing protein 5	P13010	YKSEGKCFSVLGFCK	333	YES	1	0.877251	0.922314	0.847535	0.708995	0.644303	16.1965	0.9363	0.441639	0.984799	-0.753436	2.27295	-0.309508	0.856285
MCM6	DNA replication licensing factor MCM6	Q14566	FLLDTNK	191	YES	1	1.04665	0.978394	1.00726	0.955728	0.593609	19.0206	0.9827	0.590847	1.00809	-0.75029	6.8064	-0.060427	0.521284
NSD3	Histone-lysine N-methyltransferase NSD3	Q9BZ95	ELFESSLCGDLLNEVQASEHTK	166	YES	1	0.961436	0.900868	0.796513	0.587362	0.697253	0.569673	0.9184	0.640475	0.978413	-1.16477	1.3457	-0.74855	2.9564
XRCC6	X-ray repair cross-complementing protein 6	P12956	FTYRSDSFENPVLQQHFR	471	YES	1	0.99078	0.840706	0.772641	0.707373	0.57155	2.59416	0.9625	0.466131	1.01265	-0.743951	2.34736	-0.462187	1.98452
GCN1	Stalled ribosome sensor GCN1	Q92616	LTEVLTDSHVKVQK	1543	YES	1	1.00574	0.746692	0.636098	0.594209	0.519022	0.0783847	0.9714	0.570906	1.0192	-0.752839	1.69506	-0.742854	2.3427
MCM6	DNA replication licensing factor MCM6	Q14566	MHCCDEVQPK	634	YES	1	0.933325	0.904783	0.873948	0.897418	0.552631	30.0421	0.9297	0.526671	0.928363	-0.740402	4.46647	-0.15544	0.775806
SULT2B1	Sulfotransferase 2B1	O00204	EALGSVVAHSTFSAMK	235	YES	1	0.942852	0.963959	0.969124	0.865702	0.610803	14.9672	0.9841	0.606098	0.969166	-0.73798	4.82503	-0.116009	0.662146
NEDD4	E3 ubiquitin-protein ligase NEDD4	P46934	TYYVNHESR	626	YES	1	0.809386	0.607207	0.63366	0.607954	0.607876	0.0100599	0.9961	0.614166	1.00001	-1.14549	1.40749	-0.736126	2.13454
TSPYL2	Testis-specific Y-encoded-like protein 2	Q9H2G4	DLIIQHIPGFWVK	256	YES	1	1.03318	0.953142	1.00331	0.95555	0.629895	18.9064	0.9708	0.6282	0.99741	-0.735002	2.02124	-0.285883	0.707777
MCM6	DNA replication licensing factor MCM6	Q14566	RFLLDTNK	190	YES	1	1.09393	0.975324	1.12693	1.03921	0.600309	31.261	0.9127	0.590205	1.04925	-0.731791	3.85134	-0.0454129	0.169981
ACOT1	Acyl-coenzyme A thioesterase 1	Q86TX2	AATLILEPAGR	2	YES	1	1.0526	0.972685	0.995019	0.901572	0.603694	67.7907	0.9761	0.314557	1.01033	-0.731003	5.53449	-0.0751243	0.464068
SRCIN1	SRC kinase signaling inhibitor 1	Q9C0H9	LNNLSPAPHLASGSPPPGLPSGLPSGLQSGSPSR	294	YES	1	0.727256	0.702873	0.689836	0.443699	0.503135	0.582053	0.9107	0.261599	0.998486	-0.72697	2.46939	-0.909633	1.57676
CLUH	Clustered mitochondria protein homolog	O75153	QVSITASTR	248	YES	1	1.0174	0.912607	0.941354	0.974992	0.612546	30.1199	0.9357	0.612508	0.969287	-0.725948	3.11415	-0.207301	0.672356
MYH9	Myosin-9	P35579	NTDQASMPDNTAAQKVSHLLGINVTDFTRGILTPR	359	YES	1	0.919661	0.659372	0.685902	0.706296	0.574606	0.0162914	0.9261	0.655519	1.00001	-0.725768	2.07764	-0.207571	0.35288
SULT2B1	Sulfotransferase 2B1	O00204	SVPIWER	94	YES	1	1.06799	1.06	1.04367	1.02742	0.667781	18.5477	0.9766	0.667718	1.04297	-0.72559	3.99751	-0.0298717	0.174961
SULT2B1	Sulfotransferase 2B1	O00204	IAGQLKDPGTPDQFLR	162	YES	1	0.991391	1.0063	0.953012	0.830127	0.620713	25.9912	0.9976	0.480455	1.00113	-0.725435	5.33645	-0.208329	2.39615
HADHA	Trifunctional enzyme subunit alpha	P40939	GFYIYQEGVKR	635	YES	1	1.08473	1.04891	0.995053	0.996167	0.627648	23.4019	0.9605	0.6202	1.03223	-0.725095	5.6761	-0.0508376	0.348466
MCM6	DNA replication licensing factor MCM6	Q14566	GDINVCIVGDPSTAK	388	YES	1	0.969677	1.01358	1.01675	0.922487	0.60494	14.2307	0.989	0.604777	1	-0.722315	8.82585	-0.127369	1.9
RBM8A	RNA-binding protein 8A	Q9Y5S9	ADVLDLHEAGGEDFAMDEDGDESIHK	2	YES	1	0.87876	0.967704	0.677156	0.612037	0.520824	0.804222	0.9395	0.566419	0.948842	-0.704939	1.54432	-0.719495	3.29514
HADHA	Trifunctional enzyme subunit alpha	P40939	ILQEGVDPK	561	YES	1	0.935223	0.962864	0.908656	0.959268	0.603753	39.8523	0.9565	0.602705	0.953213	-0.717303	7.28165	-0.0572604	0.589093
MCM4	DNA replication licensing factor MCM4	P33991	KPDIYER	455	YES	1	1.03492	0.972346	0.902516	0.952611	0.546317	34.4189	0.9415	0.508609	0.977766	-0.714738	3.80193	-0.0093296	0.0304094
HADHA	Trifunctional enzyme subunit alpha	P40939	VIGMHYFSPVDKMQLLEIITTEK	494	YES	1	0.869551	0.951123	0.994178	0.939509	0.573006	22.1916	0.9164	0.57218	0.953733	-0.713089	4.52736	-0.194608	0.633949
CLUH	Clustered mitochondria protein homolog	O75153	SVEGLQEGSVLR	106	YES	1	0.967845	1.01607	0.945883	0.852098	0.606011	66.5175	0.9858	0.313523	0.994401	-0.711616	6.77967	-0.168643	1.71762
PIP4K2C	Phosphatidylinositol 5-phosphate 4-kinase type-2 gamma	Q8TBX8	FLISYDR	141	YES	1	0.945885	0.87012	0.931548	0.784336	0.547894	11.8134	0.9364	0.546644	0.937075	-0.711456	3.03852	-0.203701	0.687396
ABHD5	1-acylglycerol-3-phosphate O-acyltransferase ABHD5	Q8WTS1	ALGAALTPFNPLAGLR	200	YES	1	1.01851	0.87788	0.717496	0.692332	0.60508	0.22241	0.9732	0.636473	1.01854	-0.709464	4.03173	-0.373341	1.41836
YARS1	Tyrosine--tRNA ligase	P54577	FNTPALKK	328	YES	1	1.02504	0.98245	0.923276	0.903301	0.573226	143.061	0.9714	0.0257457	0.993066	-0.708466	5.12876	-0.0715716	0.441326
YARS1	Tyrosine--tRNA ligase	P54577	NSVEVALNK	311	YES	1	0.988811	0.978144	0.991463	0.964053	0.59804	21.9065	0.9981	0.595805	0.989606	-0.708296	5.93586	-0.0528582	0.728065
SCCPDH	Saccharopine dehydrogenase-like oxidoreductase	Q8NBX0	SAIYGFGDQSNLR	199	YES	1	0.960283	0.972054	0.973231	0.99886	0.620785	52.2302	0.9886	0.613314	0.980889	-0.708203	5.65656	-0.016615	0.0921345
LMNA	Prelamin-A/C	P02545	KTLDSVAKER	90	YES	1	1.04105	0.773917	0.738933	0.641324	0.612607	0.0794986	0.9409	0.664246	1.02062	-0.490959	1.09114	-0.707526	2.06454
TNIP1	TNFAIP3-interacting protein 1	Q15025	SELLEVNKQWDQHFR	311	YES	1	1.05444	0.93714	0.904325	0.68332	0.715726	1.23331	0.9351	0.699475	0.99721	-0.707176	2.12554	-0.591555	1.92137
HADHA	Trifunctional enzyme subunit alpha	P40939	FGGGNPELLTQMVSK	611	YES	1	0.957319	1.0919	1.00692	1.00386	0.634034	14.5587	0.9259	0.634061	1.01421	-0.706442	7.02009	-0.0234034	0.261555
HADHA	Trifunctional enzyme subunit alpha	P40939	DGPGFYTTR	541	YES	1	0.948579	1.00416	0.967211	0.946069	0.596883	22.6034	0.9824	0.591559	0.980012	-0.703798	7.56045	-0.0431829	0.55893
DOHH	Deoxyhypusine hydroxylase	Q9BU89	AIPMLVDVLQDTRQEPMVR	70	YES	1	0.917954	0.956862	0.883336	0.735956	0.594134	11.5461	0.9734	0.488066	0.970496	-0.702888	2.46674	-0.293094	1.02778
MCM6	DNA replication licensing factor MCM6	Q14566	NLYHNLCTSLFPTIHGNDEVKR	345	YES	1	0.934448	1.04317	1.02827	0.907998	0.60778	13.5211	0.947	0.607605	1.00147	-0.702476	3.82996	-0.156672	0.640802
SEPHS2	Selenide	Q99611	VIEVLPR	422	YES	1	0.977992	0.976126	0.989534	0.856739	0.638694	11.6089	0.9963	0.638517	0.985925	-0.700877	4.1031	-0.215013	1.75865
MCM6	DNA replication licensing factor MCM6	Q14566	YTQPNICR	174	YES	1	1.16428	1.04449	1.10877	1.01913	0.649554	12.8253	0.9049	0.649555	1.07939	-0.699323	6.15482	0.0107564	0.0613633
MCM6	DNA replication licensing factor MCM6	Q14566	DFYVAFQDLPTR	109	YES	1	1.1295	1.08021	1.03409	0.936899	0.632295	12.97	0.9398	0.631962	1.06102	-0.695452	4.33427	-0.217883	1.19845
CLUH	Clustered mitochondria protein homolog	O75153	GFYLNQSTAYHFNPKPASPR	257	YES	1	0.966814	1.01959	0.958731	0.893326	0.60528	88.3087	0.9843	0.257447	0.992185	-0.693067	4.13169	-0.105688	0.545807
MCM6	DNA replication licensing factor MCM6	Q14566	VYSLDDIRR	566	YES	1	1.02147	1.01375	0.979948	0.938917	0.621627	105.807	0.9942	0.215256	1.00712	-0.691674	4.39517	-0.0192014	0.102027
SGTA	Small glutamine-rich tetratricopeptide repeat-containing protein alpha	O43765	LGNYAGAVQDCERAICIDPAYSK	138	YES	1	1.09753	1.07065	0.923734	0.643794	0.651551	1.18737	0.9752	0.647652	1.05606	-0.69165	4.72687	-0.630361	3.64276
SCP2	Sterol carrier protein 2	P22307	LQNLQLQPGNAK	535	YES	1	1.03657	1.03755	1.05879	1.02106	0.680985	32.9034	0.9828	0.66576	1.03325	-0.690627	3.81466	-0.0331339	0.209146
MSH6	DNA mismatch repair protein Msh6	P52701	TFFGDDFIPNDILIGCEEEEQENGK	1102	YES	1	0.963184	0.918219	0.824639	0.709579	0.727841	0.480701	0.983	0.705619	0.99068	-0.514369	1.5486	-0.69032	2.05171
SNRNP48	U11/U12 small nuclear ribonucleoprotein 48 kDa protein	Q6IEG0	IYSSLPVEVPLNHKR	137	YES	1	1.15917	0.706308	0.570483	0.562249	0.42461	0.0859752	0.9354	0.519121	1.0796	-0.939398	2.16676	-0.689645	2.17295
TRMT10C	tRNA methyltransferase 10 homolog C	Q7L0Y3	SSVQEECVSTISSSKDEDPLAATR	72	YES	1	0.993558	1.00932	0.951773	0.804435	0.580816	19.0736	0.9979	0.469307	1.00258	-0.688333	4.78832	-0.208181	1.38692
MCM6	DNA replication licensing factor MCM6	Q14566	TTGEGTSLRGDINVCIVGDPSTAK	379	YES	1	1.107	1.09133	1.04737	0.869757	0.630474	12.3303	0.9592	0.606373	1.06532	-0.688008	5.01995	-0.209265	1.47409
ACOT1	Acyl-coenzyme A thioesterase 1	Q86TX2	GLAPEQPVTLR	25	YES	1	0.989856	0.972028	1.00796	0.912694	0.581811	14.3625	0.9947	0.581609	0.992462	-0.686593	5.42615	-0.0625926	0.50587
MCM6	DNA replication licensing factor MCM6	Q14566	TSILAAANPISGHYDR	497	YES	1	0.964753	0.93922	0.982158	0.888587	0.619134	14.8949	0.9801	0.617889	0.971541	-0.685961	7.92679	-0.141504	2.73729
MCM6	DNA replication licensing factor MCM6	Q14566	VYSLDDIR	566	YES	1	0.91568	0.977812	1.00009	0.918422	0.576052	17.082	0.9637	0.575093	0.973423	-0.682582	4.51471	-0.0821431	0.444165
CES2	Cocaine esterase	O00748	GANAGVQTFLGIPFAKPPLGPLR	50	YES	1	1.00744	1.09896	0.980863	0.75937	0.612785	6.32019	0.9612	0.598536	1.03351	-0.680845	3.41731	-0.273993	1.3429
ACOT1	Acyl-coenzyme A thioesterase 1	Q86TX2	GGELCLSMASFLK	234	YES	1	0.996688	0.981876	1.01107	0.992659	0.576211	34.6507	0.9971	0.566954	0.99743	-0.67796	2.31409	0.0109751	0.0416347
MCM4	DNA replication licensing factor MCM4	P33991	GSSAVGLTAYVMKDPETR	537	YES	1	0.890338	0.966351	0.98391	0.908042	0.635011	18.3931	0.923	0.631872	0.960123	-0.677795	4.73015	-0.106892	0.941025
DOHH	Deoxyhypusine hydroxylase	Q9BU89	HEAGEALGAIGDPEVLEILK	89	YES	1	1.03291	1.02098	0.889807	0.724104	0.652737	2.06635	0.9915	0.648606	1.02328	-0.677697	5.4392	-0.460675	6.00944
MCM6	DNA replication licensing factor MCM6	Q14566	ESEDFIVEQYK	589	YES	1	1.09361	1.04094	1.04696	0.975151	0.650022	14.4493	0.966	0.649896	1.04538	-0.677017	7.03411	-0.0922401	1.01732
ANAPC1	Anaphase-promoting complex subunit 1	Q9H1A4	HHPNALNLQLR	30	YES	1	0.921638	0.688275	0.586836	0.540494	0.621168	0.0383775	0.9814	0.579456	0.999154	-0.676453	2.27207	-0.836613	2.27636
SULT2B1	Sulfotransferase 2B1	O00204	DVVVSLYHYSK	151	YES	1	1.08162	1.01893	0.982378	1.02778	0.658608	23.9164	0.951	0.658596	1.02241	-0.67354	6.23211	-0.0471925	0.306016
MCM6	DNA replication licensing factor MCM6	Q14566	SLEVILR	223	YES	1	1.04656	1.05552	1.02876	0.988571	0.66439	15.0931	0.9838	0.664353	1.03271	-0.673201	5.57423	-0.0175208	0.104226
NGRN	Neugrin	Q9NPE2	LAEGFDVSTDVIRR	107	YES	1	0.966762	0.922809	0.562299	0.650704	0.552205	0.137328	0.9707	0.5884	0.983382	-0.671415	2.07706	-0.450161	1.1378
MCM4	DNA replication licensing factor MCM4	P33991	GILLQLFGGTR	479	YES	1	1.02678	0.969611	0.922359	0.94398	0.569807	93.8413	0.9594	0.190283	0.982028	-0.669892	4.00332	-0.0292553	0.1021
HADHB	Trifunctional enzyme subunit beta	P55084	DFMYVSQDPKDQLLLGPTYATPK	339	YES	1	0.906747	1.05926	0.991824	0.89876	0.621299	17.4461	0.9018	0.611354	0.989699	-0.669447	3.6419	-0.133518	0.55086
PDIA3	Protein disulfide-isomerase A3	P30101	FAHTNVESLVNEYDDNGEGIILFRPSHLTNK	184	YES	1	0.884778	0.780113	0.836794	0.711409	0.706368	0.395732	0.9016	0.59993	1.00048	-0.467315	1.36919	-0.669211	2.52075
MCM6	DNA replication licensing factor MCM6	Q14566	IQETQAELPR	208	YES	1	0.950329	0.982964	0.993342	0.995108	0.604066	49.9288	0.9869	0.598926	0.984352	-0.666296	6.97217	0.016898	0.156627
MCM6	DNA replication licensing factor MCM6	Q14566	HVEEFSPR	408	YES	1	0.94106	0.999679	0.958274	0.889094	0.593274	57.7161	0.9795	0.370479	0.978134	-0.665246	5.3851	-0.0502388	0.24009
DOHH	Deoxyhypusine hydroxylase	Q9BU89	AIPMLVDVLQDTR	70	YES	1	0.941407	1.04557	0.846551	0.745188	0.618898	3.683	0.9228	0.594198	0.997309	-0.664844	2.80166	-0.4138	2.3569
GSPT1	Eukaryotic peptide chain release factor GTP-binding subunit ERF3A	P15170	SVVAPPGAPKKEHVNVVFIGHVDAGK	62	YES	1	1.08407	0.767147	0.693408	0.805205	0.689256	0.0678018	0.9103	0.729292	1.04202	-0.664442	3.45792	-0.296242	1.11941
SYAP1	Synapse-associated protein 1	Q96A49	SVEEGKIDGIIDKTIIGDFQK	86	YES	1	0.902499	0.674607	0.620669	0.61621	0.649683	0.0220713	0.9948	0.628394	0.999824	-0.851013	1.79601	-0.662743	3.66188
MDC1	Mediator of DNA damage checkpoint protein 1	Q14676	TPESIVPIAPELQPSTSR	1567	YES	1	0.91472	0.93944	0.980702	0.673092	0.723984	2.99583	0.9397	0.698537	0.958719	-0.661067	2.60694	-0.528788	2.10031
HADHA	Trifunctional enzyme subunit alpha	P40939	FGELVMTK	327	YES	1	1.04541	1.02936	0.943181	0.908298	0.613973	131.381	0.97	0.134781	1.01766	-0.660206	2.63714	-0.303905	1.40162
HADHA	Trifunctional enzyme subunit alpha	P40939	TGIEQGSDAGYLCESQK	310	YES	1	1.03477	1.08112	1.03918	0.971075	0.632737	16.657	0.9755	0.631331	1.03878	-0.655632	5.90063	-0.0943077	1.0212
AAR2	Protein AAR2 homolog	Q9Y312	QICAFSDVLPVLSMK	154	YES	1	0.827176	0.812952	0.731582	0.60115	0.560274	3.68119	0.9807	0.333943	0.997358	-0.652529	2.67468	-0.564057	2.36202
P4HB	Protein disulfide-isomerase	P07237	ITEFCHR	339	YES	1	0.980232	0.939889	0.870478	0.632612	0.670518	1.17006	0.9796	0.651561	0.973375	-0.617702	2.20296	-0.652434	3.07454
YARS1	Tyrosine--tRNA ligase	P54577	NLQEVLGEEKLK	17	YES	1	1.02746	1.00856	0.978265	0.913703	0.614013	107.898	0.9946	0.194257	1.00962	-0.650524	5.76437	-0.0989852	1.30077
NENF	Neudesin	Q9UMX5	RILNEDGSPNLDFKPEDQPHFDIKDEF	146	YES	1	1.05123	0.976916	0.960987	0.750199	0.505255	13.8231	0.9885	0.406422	1.0153	-0.90743	1.88831	-0.643757	2.13934
HADHB	Trifunctional enzyme subunit beta	P55084	FNNWGGSLSLGHPFGATGCR	417	YES	1	1.01407	1.05562	0.944893	0.944186	0.669152	97.686	0.9438	0.338371	1.01016	-0.643292	2.50031	0.0475515	0.177476
MCM4	DNA replication licensing factor MCM4	P33991	KTTIENIQLPHTLLSR	628	YES	1	0.96909	1.02333	0.99965	0.943896	0.670067	16.6155	0.9831	0.669017	0.998026	-0.642984	6.39569	-0.12751	1.82371
CLUH	Clustered mitochondria protein homolog	O75153	VVEEPYTVR	118	YES	1	1.03265	1.07455	1.03306	0.974384	0.646062	20.0137	0.9775	0.6387	1.03509	-0.642374	6.00162	-0.512874	0.652951
MCM6	DNA replication licensing factor MCM6	Q14566	YTQPNICRNPVCANR	174	YES	1	1.02923	1.04583	1.0385	0.963115	0.65761	20.6615	0.989	0.645813	1.02841	-0.642154	6.67285	-0.0552815	0.478607
ECHS1	Enoyl-CoA hydratase	P30084	GKNNTVGLIQLNRPK	42	YES	1	1.01386	0.979024	1.01243	0.970236	0.6427	22.303	0.9926	0.638422	1.00133	-0.640578	5.74714	-0.0261822	0.204851
GFPT1	Glutamine--fructose-6-phosphate aminotransferase [isomerizing] 1	Q06210	SDKNNEFIVIHNGIITNYK	112	YES	1	1.0293	1.03614	1.05392	0.717276	0.564438	8.34387	0.9929	0.564408	1.02986	-0.638524	2.16188	-0.29829	0.670572
CES2	Cocaine esterase	O00748	IQELEEPEER	546	YES	1	1.04489	1.0502	1.02391	0.903923	0.63865	11.8274	0.9876	0.63862	1.02975	-0.638391	5.40099	-0.188828	1.98789
SNAPC4	snRNA-activating protein complex subunit 4	Q5SXM2	GALDLGLLSQEGEAATQQWLGGQR	1267	YES	1	1.0836	0.817424	0.680297	0.583496	0.580543	0.117123	0.9587	0.598393	1.04709	-0.634564	2.51511	-0.60205	1.41571
MCM4	DNA replication licensing factor MCM4	P33991	GILLQLFGGTRK	479	YES	1	1.11872	1.04045	1.06993	0.994175	0.693586	16.4575	0.9338	0.69233	1.05729	-0.633271	4.64189	-0.0494697	0.31419
HADHA	Trifunctional enzyme subunit alpha	P40939	FVDLYGAQK	720	YES	1	1.05373	1.0179	0.995536	1.0028	0.674496	19.6061	0.9786	0.674328	1.0169	-0.630978	6.32279	-0.00863912	0.0553365
HMGB1	High mobility group protein B1	P09429	HPDASVNFSEFSKKCSER	31	YES	1	0.937818	0.90065	0.90927	0.588674	0.565085	2.83646	0.972	0.564314	0.946526	-0.688283	3.33324	-0.629538	3.37502
MRPS10	Small ribosomal subunit protein uS10m	P82664	DLTKPVVTISDEPDILYKR	57	YES	1	1.10455	0.908904	1.04233	0.652719	0.618605	6.11837	0.9043	0.619346	1.01398	-0.628771	2.05145	-0.557093	1.75998
NASP	Nuclear autoantigenic sperm protein	P49321	SAEEPQEKVDLTLDWLTETSEEAK	191	YES	1	0.878539	0.902896	0.695953	0.682669	0.549941	3.85449	0.9383	0.389402	0.997633	-0.600615	2.09562	-0.628137	2.12567
ACAD9	Complex I assembly factor ACAD9	Q9H845	LASGEHIAAFCLTEPASGSDAASIR	169	YES	1	1.04655	0.904794	0.88107	0.710967	0.589885	6.06577	0.9616	0.480034	1.01795	-0.627444	2.82815	-0.38533	2.33697
ACOT1	Acyl-coenzyme A thioesterase 1	Q86TX2	GPGVGLLGISK	223	YES	1	0.997443	1.11163	1.03742	0.969958	0.644418	19.1754	0.9354	0.637737	1.03668	-0.627133	3.85626	0.0416623	0.213347
HADHA	Trifunctional enzyme subunit alpha	P40939	GFYIYQEGVK	635	YES	1	1.06495	1.00142	1.00416	0.941095	0.676272	14.772	0.9689	0.675506	1.01766	-0.625371	5.87379	-0.0980347	0.919818
MVK	Mevalonate kinase	Q03426	EVAGLPDDCAVTER	93	YES	1	1.13038	1.01865	0.948314	0.65303	0.364453	9.55589	0.9771	0.262183	1.05726	-2.03278	2.16316	-0.623738	2.4722
PFDN2	Prefoldin subunit 2	Q9UHV9	SSGSGAGKGAVSAEQVIAGFNR	11	YES	1	0.955824	0.843636	0.71382	0.650785	0.688466	0.113764	0.9907	0.667357	0.996831	-0.530875	3.31509	-0.621407	4.08091
MAP2K2	Dual specificity mitogen-activated protein kinase kinase 2	P36507	RKPVLPALTINPTIAEGPSPTSEGASEANLVDLQK	5	YES	1	0.837977	0.78452	0.780898	0.614407	0.686548	0.0507569	0.9009	0.610885	0.998758	-0.462489	1.51768	-0.621136	2.17576
MCM6	DNA replication licensing factor MCM6	Q14566	YLQLAEELIRPER	46	YES	1	0.995193	0.99643	0.960868	0.964907	0.669575	25.0198	0.988	0.662884	0.988172	-0.6202	3.82582	-0.0670808	0.438725
AAR2	Protein AAR2 homolog	Q9Y312	AAVQMDPELAKR	2	YES	1	0.961686	0.940429	0.869392	0.716191	0.651383	2.66543	0.9931	0.616133	0.985274	-0.618002	6.71764	-0.474387	5.93279
MCM4	DNA replication licensing factor MCM4	P33991	LASALAPSIYEHEDIK	462	YES	1	0.911254	0.951729	0.936253	0.91734	0.686588	14.3899	0.9301	0.686581	0.949809	-0.61706	4.70801	-0.223597	1.35793
MCM4	DNA replication licensing factor MCM4	P33991	RLHGLDEEAEQK	428	YES	1	1.01274	1.10466	1.03415	0.987318	0.623757	16.5971	0.9548	0.623351	1.03783	-0.61676	4.88446	-0.0360036	0.197659
MCM4	DNA replication licensing factor MCM4	P33991	LASALAPSIYEHEDIKK	462	YES	1	1.02094	1.01023	1.06856	0.955639	0.657871	17.386	0.9749	0.654363	1.02494	-0.616251	6.80845	-0.11633	1.4716
MAPK8	Mitogen-activated protein kinase 8	P45983	DNNFYSVEIGDSTFTVLKR	7	YES	1	1.12315	0.944206	1.01239	0.799145	0.591052	10.1808	0.9068	0.56887	1.02539	-0.614961	2.21789	-0.435735	1.07747
REPS1	RalBP1-associated Eps domain-containing protein 1	Q96D71	HAASYSSDSENQGSYSGVIPPPPGR	112	YES	1	0.837156	0.787363	0.732217	0.783527	0.730693	0.0037911	0.9585	0.746759	0.999929	-0.612993	3.28292	-0.334829	1.16178
MCM4	DNA replication licensing factor MCM4	P33991	LSEEASQALIEAYVDMR	702	YES	1	1.061	0.974957	1.04063	0.84978	0.695597	9.79354	0.9535	0.695589	1.01915	-0.607961	4.62815	-0.236523	3.29687
HSDL2	Hydroxysteroid dehydrogenase-like protein 2	Q6YN16	LQLQPKPR	299	YES	1	1.05103	1.03363	1.00429	0.773204	0.681448	5.32482	0.9889	0.678028	1.02836	-0.45922	0.945546	-0.607008	2.11976
HOOK3	Protein Hook homolog 3	Q86VS8	DSLKETIEELR	418	YES	1	1.08258	1.04951	0.830396	0.639596	0.581023	1.10563	0.9799	0.59587	1.04941	-0.606841	2.31397	-0.495914	1.55617
SCP2	Sterol carrier protein 2	P22307	KLEEEGEQFVK	443	YES	1	0.999573	0.99202	0.909133	0.946004	0.656234	21.6852	0.9337	0.652782	0.975292	-0.605926	6.09447	-0.12146	1.38973
MCM4	DNA replication licensing factor MCM4	P33991	LVIWGTDVNVAACK	150	YES	1	0.973232	0.855668	0.844335	0.804036	0.68155	21.5816	0.9362	0.490505	1.00383	-0.604582	2.93992	-0.149713	0.47229
FECH	Ferrochelatase	P22830	ECGVENIR	359	YES	1	0.957433	0.925535	0.860155	0.852809	0.652931	59.0876	0.9334	0.425168	0.982792	-0.603422	3.6754	-0.247507	1.7785
SCP2	Sterol carrier protein 2	P22307	LEEEGEQFVKK	444	YES	1	1.03195	1.04819	0.979058	0.912493	0.616369	100.979	0.9849	0.208543	1.02273	-0.601302	3.77062	-0.122141	0.790191
HADHA	Trifunctional enzyme subunit alpha	P40939	SEVSSDEDIQFR	665	YES	1	1.00926	1.06695	0.994959	0.98666	0.656789	20.8645	0.9695	0.654453	1.01781	-0.600963	3.18302	0.102412	0.468498
MCM4	DNA replication licensing factor MCM4	P33991	LHGLDEEAEQK	429	YES	1	1.01777	1.05652	1.03463	0.913238	0.660027	13.5582	0.9842	0.658153	1.0273	-0.594122	6.45239	-0.115486	1.07089
ECHS1	Enoyl-CoA hydratase	P30084	ALNALCDGLIDELNQALK	57	YES	1	0.970177	0.975421	0.818307	0.831351	0.651547	38.6136	0.9162	0.427085	1.0032	-0.593072	3.603	-0.310202	1.17695
EHD4	EH domain-containing protein 4	Q9H223	SISVIDSPGILSGEKQR	151	YES	1	0.751971	0.707513	0.61026	0.574727	0.623072	0.00481765	0.9756	0.587079	0.999282	-0.888074	1.60454	-0.589873	2.06236
CDK13	Cyclin-dependent kinase 13	Q14004	TKPLTPSIGAK	584	YES	1	1.11239	1.03732	0.974495	0.923366	0.640624	98.2669	0.9367	0.247085	1.0452	-0.587721	2.34945	-0.40233	0.930535
FARSA	Phenylalanine--tRNA ligase alpha subunit	Q9Y285	DQHDTFFLRDPAEALQLPMDYVQR	272	YES	1	0.988992	1.0153	0.923713	0.848487	0.661395	76.9922	0.9834	0.36453	1.0046	-0.586362	6.41776	-0.296356	2.02662
YARS1	Tyrosine--tRNA ligase	P54577	VDAQFGGIDQR	179	YES	1	1.01265	1.05107	1.02717	1.01991	0.697827	24.9329	0.9838	0.697572	1.02275	-0.585985	5.88272	0.0165433	0.156923
POLR2I	DNA-directed RNA polymerase II subunit RPB9	P36954	ITHEVDELTQIIADVSQDPTLPR	58	YES	1	1.03331	0.975113	0.875105	0.691284	0.711134	1.1767	0.9833	0.697439	1.00518	-0.286326	0.709745	-0.585671	2.78844
SCP2	Sterol carrier protein 2	P22307	IGGIFAFK	455	YES	1	1.0247	1.05455	1.0088	0.996869	0.67007	15.4992	0.9832	0.670069	1.02203	-0.584474	5.24359	-0.0873091	0.591097
CLUH	Clustered mitochondria protein homolog	O75153	ERPLCPLQPQNR	196	YES	1	1.07103	1.05748	1.08413	0.961156	0.689316	15.0084	0.9625	0.687113	1.05311	-0.584269	4.6991	-0.171749	1.03984
PRPF8	Pre-mRNA-processing-splicing factor 8	Q6P2Q9	ISLIQIFR	1571	YES	1	1.09693	1.06283	0.938125	0.786693	0.658196	4.4698	0.9567	0.629712	1.0563	-0.583354	2.32676	-0.357919	1.61194
ACAD9	Complex I assembly factor ACAD9	Q9H845	FSMGSVVAGLLKR	305	YES	1	1.02361	0.958954	0.900782	0.90649	0.668054	126.754	0.9236	0.315113	0.990318	-0.583013	2.64893	-0.232239	1.00484
HDGFL2	Hepatoma-derived growth factor-related protein 2	Q7Z4V5	RCLNALEELGTLQVTSQILQK	495	YES	1	0.976931	0.726635	0.592962	0.586048	0.428611	0.107282	0.9492	0.49259	1.01953	-0.970299	1.64327	-0.582823	2.39102
HADHB	Trifunctional enzyme subunit beta	P55084	LAAAFAVSRLEQDEYALR	230	YES	1	0.984794	1.08044	0.971398	0.961078	0.660626	79.3696	0.9338	0.390364	1.01159	-0.582153	5.56618	-0.12974	1.17047
HADHB	Trifunctional enzyme subunit beta	P55084	NVVVVDGVR	53	YES	1	1.01515	1.0042	0.944316	0.970714	0.711499	57.4928	0.9554	0.593694	0.99187	-0.579594	4.88973	-0.125288	1.05788
FARSA	Phenylalanine--tRNA ligase alpha subunit	Q9Y285	THSQGGYGSQGYK	299	YES	1	1.03919	0.99344	0.978132	1.02036	0.727135	25.4243	0.966	0.727152	1.00627	-0.579389	2.12255	-0.0951761	0.253819
PTGES3	Prostaglandin E synthase 3	Q15185	SILCCLRKGESGQSWPR	72	YES	1	1.15489	0.986587	0.853745	0.693234	0.637184	0.988194	0.9256	0.634207	1.06924	-0.917497	2.02169	-0.578652	3.01053
PPOX	Protoporphyrinogen oxidase	P50336	VVLVESSER	30	YES	1	1.04699	1.02275	0.90222	0.922192	0.661802	143.038	0.9114	0.243841	1.01354	-0.578599	3.42874	-0.0214251	0.0838019
DSG2	Desmoglein-2	Q14126	SSKGQIIGNFQAFDEDTGLPAHAR	404	YES	1	0.976171	0.880226	0.868159	0.788941	0.71863	5.08664	0.9685	0.608692	1.00392	-0.578406	3.05076	-0.285724	0.914316
MCM6	DNA replication licensing factor MCM6	Q14566	VRIQETQAELPR	206	YES	1	1.07998	1.08628	1.05148	1.00724	0.70534	17.6299	0.9548	0.704158	1.05442	-0.578194	4.56886	0.00508399	0.0308421
PRDX5	Peroxiredoxin-5	P30044	ETDLLLDDSLVSIFGNRR	160	YES	1	1.0154	0.995233	0.900353	0.868074	0.74584	28.0948	0.9623	0.596396	1.0137	-0.575164	3.38985	-0.284609	2.39598
MCM6	DNA replication licensing factor MCM6	Q14566	IVDLHSR	552	YES	1	1.03678	1.0992	1.02909	1.02159	0.669053	19.9987	0.9559	0.668604	1.04127	-0.574979	3.55054	-0.0540451	0.230168
HADHB	Trifunctional enzyme subunit beta	P55084	AALTGLLHR	82	YES	1	1.05474	1.10618	1.02135	1.0371	0.726292	20.5487	0.9291	0.726139	1.04561	-0.571982	3.4796	0.0161622	0.0501802
ECHS1	Enoyl-CoA hydratase	P30084	AFAAGADIK	93	YES	1	0.954117	0.986155	0.967833	0.89964	0.725977	30.4608	0.9786	0.649771	0.979943	-0.571883	2.43107	-0.0944804	0.720339
ECHS1	Enoyl-CoA hydratase	P30084	KLFYSTFATDDR	261	YES	1	1.02631	0.989333	1.05681	0.98287	0.693336	20.2867	0.969	0.690588	1.0181	-0.567737	6.24778	-0.0395993	0.341613
HNRNPL	Heterogeneous nuclear ribonucleoprotein L	P14866	MNCDRVFNVFCLYGNVEK	394	YES	1	0.74491	0.778445	0.714646	0.600933	0.524239	6.33305	0.9548	0.24787	0.997265	-0.720924	2.10157	-0.565703	2.59205
RSL1D1	Ribosomal L1 domain-containing protein 1	O76021	SAALPIFSSFVSNWDEATKR	258	YES	1	1.01194	1.08693	1.01727	1.0767	0.661911	43.2793	0.9482	0.656718	1.03861	-0.564598	3.01035	-0.0110456	0.0352899
WWC3	Protein WWC3	Q9ULE0	ESAELPLPAGWEEAR	55	YES	1	0.987483	0.785764	0.733612	0.599235	0.422249	7.20337	0.9662	0.185297	1.01392	-1.03696	2.28602	-0.564571	2.51501
FLYWCH2	FLYWCH family member 2	Q96CP2	LVLLTASKDSTK	42	YES	1	1.04219	0.697191	0.611936	0.687819	0.676071	0.0638996	0.9753	0.658596	1.02111	-0.549241	1.13351	-0.564202	2.01059
CLUH	Clustered mitochondria protein homolog	O75153	GLEMDPIDCTPPEYILPGSR	176	YES	1	0.854535	0.884013	0.776928	0.73946	0.695918	2.16182	0.952	0.551913	0.998568	-0.563873	2.17114	-0.287745	1.3553
MCM4	DNA replication licensing factor MCM4	P33991	LSNKVEAIDVEEAK	749	YES	1	1.00148	0.993114	1.0009	0.948595	0.69399	17.6825	0.9994	0.691842	0.998891	-0.560569	6.44721	-0.116093	1.50641
PBDC1	Protein PBDC1	Q9BVG4	LISSVDPQFLK	53	YES	1	1.09904	0.961458	1.02878	0.877233	0.674589	11.0301	0.9092	0.674444	1.02234	-0.557912	3.47929	-0.151017	0.680542
TOP2B	DNA topoisomerase 2-beta	Q02880	KTSFDQDSDVDIFPSDFPTEPPSLPR	1574	YES	1	0.970884	0.996477	0.874958	0.833082	0.722589	11.8858	0.9553	0.619869	1.00127	-0.552151	3.78831	-0.364525	2.4491
SULT2B1	Sulfotransferase 2B1	O00204	NHFTVAQSEAFDR	283	YES	1	0.973123	0.977198	0.961606	0.946549	0.660693	21.9497	0.9906	0.656297	0.97802	-0.551246	6.64477	-0.0809148	1.42804
MCM6	DNA replication licensing factor MCM6	Q14566	ISKESEDFIVEQYK	586	YES	1	1.10569	0.99993	1.03528	0.95569	0.696039	17.1344	0.9252	0.689513	1.03537	-0.550919	5.64741	-0.133326	1.33311
MACF1	Microtubule-actin cross-linking factor 1	O94854	DIPLDCDCVLTGEDILGEVANR	413	YES	1	1.09371	1.00662	0.828606	0.709317	0.746933	0.557129	0.9548	0.726597	1.04334	-0.618068	2.47131	-0.548734	2.57119
HADHA	Trifunctional enzyme subunit alpha	P40939	ALTSFER	416	YES	1	0.994966	0.958364	0.950478	0.948275	0.667403	25.2491	0.976	0.657825	0.976046	-0.548551	4.72196	-0.0584572	0.426339
DOHH	Deoxyhypusine hydroxylase	Q9BU89	NAGGEEAALALAEGLHCGSALFR	184	YES	1	0.985868	1.00672	0.948715	0.763634	0.647605	5.83229	0.9972	0.63173	0.998436	-0.548394	4.28951	-0.40558	3.87115
MCM4	DNA replication licensing factor MCM4	P33991	LSNKVEAIDVEEAKR	749	YES	1	0.945013	1.00038	0.990128	0.892577	0.6796	12.7791	0.9729	0.679352	0.98389	-0.547289	4.45042	-0.13506	1.01978
RPL36A	Large ribosomal subunit protein eL42	P83881	DSLYAQGKR	31	YES	1	0.973856	0.701931	0.590919	0.664004	0.621374	0.0466327	0.9828	0.625451	0.997892	-0.547113	2.10992	-0.374968	0.991537
YARS1	Tyrosine--tRNA ligase	P54577	LSSVVTQHDSKK	136	YES	1	0.914977	0.986595	1.03946	0.892375	0.683387	12.4955	0.9011	0.683248	0.985279	-0.541199	4.58281	-0.164412	1.51502
KNOP1	Lysine-rich nucleolar protein 1	Q1ED39	KGAQDPTAFSVQDPWFCEAR	156	YES	1	1.00902	0.870717	0.593228	0.721689	0.736976	0.10756	0.9098	0.683957	1.00451	-1.33998	1.101	-0.540756	2.05653
HADHB	Trifunctional enzyme subunit beta	P55084	VGLPPLEK	409	YES	1	1.02282	1.03521	0.963985	0.992568	0.68604	25.8804	0.9662	0.682514	1.00552	-0.540466	5.0077	-0.0370626	0.348795
SCP2	Sterol carrier protein 2	P22307	MNPQSAFFQGK	512	YES	1	1.02949	0.999972	0.98004	0.984561	0.708243	22.3875	0.9827	0.706449	1.00239	-0.535507	7.05088	-0.0612603	0.877887
SCP2	Sterol carrier protein 2	P22307	LQNLQLQPGNAKL	535	YES	1	1.03537	1.05105	0.991726	0.9402	0.713173	73.4767	0.9758	0.472493	1.02505	-0.535299	6.28149	-0.134114	2.02918
HSPD1	60 kDa heat shock protein	P10809	GQKCEFQDAYVLLSEKK	234	YES	1	1.00195	0.911983	0.837785	0.689386	0.672771	0.865887	0.9849	0.648029	1.00433	-0.594181	4.22256	-0.529446	4.54531
EEF1B2	Elongation factor 1-beta	P24534	SSILLDVKPWDDETDMAKLEECVR	140	YES	1	0.916003	0.895286	0.85818	0.745604	0.627683	24.6372	0.9821	0.412303	0.987253	-0.526084	2.45717	-0.300268	1.45206
MCM4	DNA replication licensing factor MCM4	P33991	EALKQSATDPR	767	YES	1	0.92103	1.01402	0.970544	0.940833	0.726282	20.734	0.9083	0.721316	0.976452	-0.523846	4.26471	-0.145585	1.22797
MCM6	DNA replication licensing factor MCM6	Q14566	IEESIDRVYSLDDIRR	559	YES	1	1.11615	1.0027	1.05484	0.955179	0.696082	12.5171	0.9153	0.696065	1.04342	-0.522651	4.74097	-0.0484699	0.276008
SNRPC	U1 small nuclear ribonucleoprotein C	P09234	TTAAFQQGK	53	YES	1	0.896822	0.935085	0.975469	0.801571	0.701195	8.92439	0.9045	0.70129	0.951883	-0.520202	2.74223	-0.658086	1.37086
CDK2	Cyclin-dependent kinase 2	P24941	DLKPQNLLINTEGAIK	127	YES	1	1.147	1.0563	1.15651	0.9115	0.6248	11.917	0.9135	0.62261	1.0901	-0.5197	2.29986	-0.0124212	0.0380317
ECHS1	Enoyl-CoA hydratase	P30084	ICPVETLVEEAIQCAEK	212	YES	1	1.06519	1.06607	1.00297	0.979711	0.69776	16.0645	0.9564	0.697217	1.03361	-0.518003	4.02575	-0.0462718	0.188811
MKI67	Proliferation marker protein Ki-67	P46013	KADVEEEFLAFR	1883	YES	1	0.868258	0.905934	0.851851	0.748638	0.704016	9.14284	0.9256	0.542227	0.99339	-0.517052	2.45658	-0.342911	2.07942
DOHH	Deoxyhypusine hydroxylase	Q9BU89	EALLDESRPLFER	163	YES	1	1.00761	0.993326	0.931015	0.831008	0.684424	22.4864	0.9974	0.545084	1.00768	-0.51624	4.07693	-0.32924	3.12897
TLN1	Talin-1	Q9Y490	ALAVNPRDPPSWSVLAGHSR	1619	YES	1	0.783791	0.811938	0.693738	0.616348	0.672299	0.016912	0.9177	0.600695	0.998515	-0.404068	1.40737	-0.514767	2.00591
MCM6	DNA replication licensing factor MCM6	Q14566	DVEQQFK	167	YES	1	0.991956	1.01726	0.995583	1.03519	0.732885	70.732	0.9798	0.69328	1.008	-0.514465	4.90461	-0.017165	0.105851
MCM4	DNA replication licensing factor MCM4	P33991	AGIICQLNAR	601	YES	1	1.06428	1.01015	1.0067	1.00068	0.714156	19.8134	0.9667	0.713624	1.02028	-0.514309	5.76323	-0.046975	0.416
CASKIN2	Caskin-2	Q8WXE0	LPSAPTPLRPGFSR	356	YES	1	1.12086	0.840385	0.698988	0.715203	0.687012	0.0913053	0.9528	0.7004	1.06043	-0.507681	1.72899	-0.513833	2.64662
HADHA	Trifunctional enzyme subunit alpha	P40939	DATLTALDR	391	YES	1	0.966254	0.993067	0.971353	0.92918	0.646561	19.3687	0.9912	0.641371	0.982746	-0.513246	3.93106	-0.020388	0.10336
RPS28	Small ribosomal subunit protein eS28	P62857	NVKGPVREGDVLTLLESER	45	YES	1	1.056	0.946959	0.900716	0.726045	0.59716	5.67054	0.9755	0.520006	1.02137	-0.555812	1.51632	-0.508726	3.28517
YARS1	Tyrosine--tRNA ligase	P54577	EYTLDVYR	128	YES	1	1.06028	1.03163	1.06062	1.02814	0.703125	34.4295	0.9737	0.687334	1.03811	-0.507705	5.02836	-0.0125386	0.0897728
ORC4	Origin recognition complex subunit 4	O43929	AHSVYNFEKPVVMK	361	YES	1	0.957104	0.899234	0.773951	0.660279	0.668414	0.396188	0.9923	0.648478	0.991839	-0.428877	1.48717	-0.505621	2.80456
MCM4	DNA replication licensing factor MCM4	P33991	GMVSAYPR	725	YES	1	1.02092	1.02061	1.03378	1.01955	0.703437	38.6966	0.9929	0.696394	1.01926	-0.505449	4.2635	-0.0539128	0.315894
SCP2	Sterol carrier protein 2	P22307	LEEEGEQFVK	444	YES	1	0.988502	1.00237	0.959504	0.946457	0.668008	113.196	0.9884	0.301426	0.989891	-0.503025	4.44437	-0.0576585	0.410046
FARSB	Phenylalanine--tRNA ligase beta subunit	Q9NSD9	TAEFQVAR	444	YES	1	1.02221	0.886706	0.746343	0.676552	0.628136	0.287038	0.9863	0.638312	1.01872	-0.502319	2.03101	-0.362013	1.009
ACAD9	Complex I assembly factor ACAD9	Q9H845	FFTEEVDSR	77	YES	1	0.893151	0.879331	0.783409	0.768289	0.690525	3.34211	0.9768	0.554128	0.999677	-0.502145	3.18374	-0.248245	1.39719
MCM4	DNA replication licensing factor MCM4	P33991	IAEPSVCGR	322	YES	1	0.96664	0.972335	0.937941	0.906427	0.677088	16.4405	0.9725	0.674505	0.969411	-0.500967	5.22767	-0.086465	0.908804
YARS1	Tyrosine--tRNA ligase	P54577	IFTFAEK	191	YES	1	0.958457	0.969898	1.01475	0.975985	0.715663	26.0871	0.9671	0.712993	0.985771	-0.495254	6.03835	-0.000978315	0.00790411
HADHB	Trifunctional enzyme subunit beta	P55084	DQLLLGPTYATPK	349	YES	1	1.02142	1.04795	0.963178	0.941171	0.709361	105.981	0.9607	0.392422	1.01535	-0.495208	4.06253	-0.114909	0.973936
SULT2B1	Sulfotransferase 2B1	O00204	ICGFLGRPLGK	224	YES	1	1.00355	0.977676	1.00835	0.982659	0.667636	27.3291	0.9938	0.661467	0.997392	-0.492702	4.2627	0.0629505	0.401827
SRRT	Serrate RNA effector molecule homolog	Q9BXP5	SVNIKEICWNLQNIR	472	YES	1	1.08396	0.956166	0.690981	0.690219	0.662859	0.174974	0.9771	0.678355	1.04198	-0.49234	2.96706	-0.411773	1.7159
CCAR2	Cell cycle and apoptosis regulator protein 2	Q8N163	INPLPGGR	9	YES	1	0.968074	0.991571	0.937863	0.790905	0.717722	4.37309	0.9914	0.708088	0.987957	-0.489528	5.11364	-0.275093	3.04761
CRNKL1	Crooked neck-like protein 1	Q9BZJ0	VWISFAQFELSSGK	711	YES	1	0.985352	1.00801	0.977795	0.919333	0.717343	66.4456	0.9944	0.520453	0.996867	-0.488655	2.02241	-0.11417	0.342624
STK4	Serine/threonine-protein kinase 4	Q13043	KLDEDSLTKQPEEVFDVLEK	16	YES	1	0.883458	0.869593	0.809486	0.665502	0.691599	0.514948	0.9378	0.607662	0.994685	-0.4849	3.52863	-0.494364	1.69599
IPO4	Importin-4	Q8TEX9	APAALPALCDLLASAADPQIR	34	YES	1	0.936446	0.904698	0.899942	0.864125	0.636124	14.754	0.9184	0.63522	0.935376	-0.481339	2.10675	-0.0659761	0.228017
HSPB1	Heat shock protein beta-1	P04792	WRVSLDVNHFAPDELTVK	95	YES	1	1.10954	0.84772	0.764169	0.784171	0.73307	0.0833968	0.9346	0.760467	1.05477	-0.450713	2.01458	-0.47983	2.38412
BCL2L13	Bcl-2-like protein 13	Q9BXK5	EPDTEVITVEK	359	YES	1	0.920757	0.660867	0.738647	0.716663	0.645117	0.0122613	0.9441	0.690322	0.999999	-0.477836	2.37297	-0.421711	2.00671
YARS1	Tyrosine--tRNA ligase	P54577	YLPALGYSKR	198	YES	1	0.983994	0.96945	0.918657	0.966276	0.68059	25.186	0.9487	0.680439	0.968041	-0.477208	4.13348	-0.0657388	0.640685
RPS7	Small ribosomal subunit protein eS7	P62081	LTGKDVNFEFPEFQL	180	YES	1	1.11658	0.879981	0.802344	0.71625	0.703115	0.0927916	0.9058	0.740477	1.05834	-0.469075	1.58584	-0.476166	2.0279
KYAT3	Kynurenine--oxoglutarate transaminase 3	Q6YP21	KLSAIPVSAFCNSETK	406	YES	1	1.07753	0.880822	0.817225	0.786519	0.715268	0.0906531	0.9091	0.772984	1.03878	-0.473751	2.35223	-0.30575	1.40966
HNRNPH2	Heterogeneous nuclear ribonucleoprotein H2	P55795	FFSDCKIQNGTSGIR	30	YES	1	1.02403	1.00493	0.890571	0.739362	0.672537	2.07761	0.9951	0.665532	1.01633	-0.645198	4.6342	-0.472198	4.8944
AIFM1	Apoptosis-inducing factor 1	O95831	SATEQSGTGIR	519	YES	1	1.02927	0.96377	0.828539	0.721507	0.72919	0.560414	0.9906	0.719338	1.01374	-0.471118	4.35188	-0.376133	2.36563
CRNKL1	Crooked neck-like protein 1	Q9BZJ0	AIYELAISQPR	661	YES	1	1.04162	1.04597	0.981224	0.969408	0.740312	116.232	0.9595	0.420694	1.02134	-0.469346	2.97953	-0.163003	0.910772
POGZ	Pogo transposable element with ZNF domain	Q7Z3K3	ADTDLFMECEEEELEPWQK	2	YES	1	1.03885	0.938163	0.785908	0.670063	0.665494	0.473733	0.9888	0.658086	1.01995	-0.663213	2.78114	-0.464865	2.93332
CKAP5	Cytoskeleton-associated protein 5	Q14008	LLPDTINSINLDR	1719	YES	1	1.01985	1.01925	1.02	0.953299	0.727996	19.0821	0.9955	0.718809	1.01484	-0.463085	4.11058	-0.160914	1.1255
HADHB	Trifunctional enzyme subunit beta	P55084	LAAAFAVSR	230	YES	1	1.01177	1.08908	0.999864	0.982851	0.741364	30.5209	0.9218	0.701322	1.02585	-0.456744	3.68881	-0.0553689	0.320461
SPR	Sepiapterin reductase	P35270	VPADLGAEAGLQQLLGALR	66	YES	1	0.856318	0.971888	0.837478	0.657319	0.554773	3.5778	0.919	0.537044	0.946113	-0.626364	2.12968	-0.456579	2.18019
HADHB	Trifunctional enzyme subunit beta	P55084	LEQDEYALR	239	YES	1	1.01622	1.00376	0.974756	0.949627	0.685072	91.3908	0.9914	0.397718	1.00125	-0.448397	3.60941	0.0163519	0.0791878
HADHB	Trifunctional enzyme subunit beta	P55084	DNGIRPSSLEQMAK	278	YES	1	0.94264	0.992719	0.941752	0.930599	0.726976	31.8169	0.9422	0.684076	0.970351	-0.440926	3.23759	-0.0290961	0.131548
LUC7L3	Luc7-like protein 3	O95232	WDHESVCKYYLCGFCPAELFTNTR	29	YES	1	0.952137	0.917712	0.911116	0.813091	0.69012	26.9591	0.9734	0.533668	0.982168	-0.435291	3.06989	-0.317204	2.37253
SPR	Sepiapterin reductase	P35270	LLLINNAGSLGDVSK	95	YES	1	0.981324	0.950703	0.965594	0.950282	0.736108	19.1425	0.9716	0.735196	0.97445	-0.425965	3.62605	-0.0743857	0.40327
MCM4	DNA replication licensing factor MCM4	P33991	ELSRKPDIYER	451	YES	1	1.09058	1.00014	1.01641	0.9389	0.74337	14.0863	0.9209	0.740631	1.02701	-0.424083	3.93791	-0.107998	1.17322
PIP4K2C	Phosphatidylinositol 5-phosphate 4-kinase type-2 gamma	Q8TBX8	VYIGEEEK	252	YES	1	0.932532	0.974866	0.954918	0.924149	0.673562	23.7412	0.9652	0.659885	0.965749	-0.423316	2.231	-0.0808143	0.360538
CHD8	Chromodomain-helicase-DNA-binding protein 8	Q9HCK8	RAELEMWLQGHPEFAVDPR	2334	YES	1	0.967786	0.850084	0.890445	0.773618	0.62711	29.1034	0.9259	0.414537	0.991568	-0.518638	1.83025	-0.41821	2.41382
LARP1	La-related protein 1	Q6PKG0	GLSASLPDLDSENWIEVK	544	YES	1	0.966404	1.02013	0.997855	0.757853	0.623184	8.5904	0.9891	0.623222	0.99613	-0.640154	1.35108	-0.417605	2.66368
YARS1	Tyrosine--tRNA ligase	P54577	NLQEVLGEEK	17	YES	1	1.00485	0.982146	1.00952	1.00527	0.71219	49.1945	0.9933	0.69772	1.00043	-0.417442	4.2765	0.0319731	0.225382
UBAP1	Ubiquitin-associated protein 1	Q9NZ09	GGSGSVLQDEEVLASLER	203	YES	1	0.9954	0.966664	0.830093	0.684307	0.690957	0.884529	0.997	0.680564	0.995194	-0.414739	2.59599	-0.425067	2.49096
CDK5	Cyclin-dependent kinase 5	Q00535	DLLQNLLK	261	YES	1	0.946026	0.933364	0.927572	0.887657	0.730952	13.4265	0.923	0.730536	0.951829	-0.412505	3.136	-0.0455977	0.1688
SPR	Sepiapterin reductase	P35270	SGAHVDFYDK	252	YES	1	0.987316	0.942738	0.934027	0.924251	0.717766	14.4578	0.9396	0.717711	0.966024	-0.399023	3.74305	-0.0638191	0.560014
FNBP1	Formin-binding protein 1	Q96RU3	VLATDFDDEFDDEEPLPAIGTCK	534	YES	1	0.986094	1.03595	0.685978	0.711387	0.706188	0.333727	0.9881	0.701158	1.00736	-0.404964	1.67756	-0.39546	2.5256
DECR1	2	Q16698	FFSPLQK	43	YES	1	0.953763	1.0488	1.01889	0.838794	0.74592	8.56049	0.9315	0.746044	1.0054	-0.389074	2.99688	-0.251328	2.68246
HEXIM1	Protein HEXIM1	O94992	VRELELELDRLR	322	YES	1	0.951323	0.906811	0.873868	0.828028	0.717543	20.2826	0.9786	0.566892	0.996486	-0.38306	2.66458	-0.169478	0.933782
NCAPG2	Condensin-2 complex subunit G2	Q86XI2	NRECLLSAPR	773	YES	1	0.932303	0.860473	0.64611	0.739464	0.739311	0.11121	0.9098	0.708257	0.96616	-0.356475	1.90671	-0.368997	2.46058
PPP1R12C	Protein phosphatase 1 regulatory subunit 12C	Q9BZL4	LAQLKVELER	708	YES	1	1.01418	0.995461	0.94744	0.803825	0.725983	4.35132	0.9983	0.711161	1.00642	-0.284886	0.703799	-0.362393	2.54841
ANK3	Ankyrin-3	Q12955	YLVQDGAQVEAK	484	YES	1	0.998483	0.965526	0.963549	0.938233	0.749728	60.0807	0.9765	0.611942	0.984366	-0.359297	3.75463	-0.206312	0.79105
SPRYD4	SPRY domain-containing protein 4	Q8WW59	FREWAVVLADTAVTSGR	71	YES	1	1.02175	0.714966	0.732334	0.766811	0.722124	0.0306082	0.9825	0.734051	1.01091	-0.347559	2.11651	-0.429359	1.83709
HSPA4L	Heat shock 70 kDa protein 4L	O95757	CTPACISLGSR	34	YES	1	1.02447	1.03571	0.957259	1.02949	0.749128	36.6721	0.9316	0.747745	1.00944	-0.345869	3.27359	0.0912488	1.09026
CDC5L	Cell division cycle 5-like protein	Q99459	KPALGFYDTSEENYQALDADFR	219	YES	1	1.03579	0.991528	0.93627	0.819617	0.744459	3.85998	0.9873	0.720494	1.01653	-0.345058	2.26229	-0.211407	1.85183
SAE1	SUMO-activating enzyme subunit 1	Q9UBE0	VVFCPVK	211	NO	1	1.0478	1.02869	1.07252	1.2552	1.27277	2.27264	0.9839	1.025	1.27289	0.204296	0.998421	0.24253	2.04322
NOS1AP	Carboxyl-terminal PDZ ligand of neuronal nitric oxide synthase protein	O75052	MLVMQDPIYR	106	NO	1	0.8949	0.967068	1.05259	1.23825	1.26459	1.74921	0.9497	0.951222	1.26662	0.110528	0.245205	0.249266	2.59782
SYNE2	Nesprin-2	Q8WXH0	ILPSLLQNR	4800	NO	1	1.0091	1.05898	1.08629	1.16116	1.25536	4.41326	0.9814	0.999202	1.2968	0.251039	2.06223	0.151533	1.63183
FASN	Fatty acid synthase	P49327	QVQPEGPYR	2295	NO	1	1.03463	1.04679	1.02828	1.08325	1.28137	27.4616	0.9304	1.03859	1.28137	0.252337	2.0042	0.132936	0.820812
PKM	Pyruvate kinase PKM	P14618	APIIAVTR	448	NO	1	1.06622	1.05253	1.05708	1.14076	1.2778	5.94742	0.9051	1.02931	1.26996	0.252926	2.06201	0.0837427	0.511783
PDCD6IP	Programmed cell death 6-interacting protein	Q8WUM4	LALASLGYEK	111	NO	1	0.998312	0.926102	1.02147	1.0181	1.25764	14.5188	0.9194	0.986508	1.25767	0.254774	2.31545	0.0384238	0.175125
ALDH18A1	Delta-1-pyrroline-5-carboxylate synthase	P54886	FASYLTFSPSEVK	650	NO	1	1.03969	1.02997	1.00237	1.03591	1.26153	20.5277	0.9761	1.01793	1.26247	0.258822	2.37383	0.0294111	0.147176
PTGR3	Prostaglandin reductase 3	Q8N4Q0	FTGLESIFR	343	NO	1	1.00524	0.97697	1.00931	1.04752	1.25022	18.0874	0.988	0.997752	1.2544	0.261315	2.46578	0.0669624	0.422293
ATP6V1A	V-type proton ATPase catalytic subunit A	P38606	FTMVQVWPVR	203	NO	1	1.11701	1.07778	1.18825	1.26818	1.55179	5.0981	0.9097	1.03411	1.57401	0.411878	1.30921	0.263026	2.15951
FASN	Fatty acid synthase	P49327	LSIPTYGLQCTR	2264	NO	1	1.07928	1.04159	1.07185	1.01835	1.27128	18.6816	0.9029	1.04189	1.27107	0.266205	2.22048	0.0276623	0.133373
SMC3	Structural maintenance of chromosomes protein 3	Q9UQE7	QVIIQGFR	5	NO	1	1.0588	1.03858	0.980539	1.0786	1.26782	15.7449	0.9282	1.01954	1.26989	0.266892	2.67945	0.128881	0.962424
CSE1L	Exportin-2	P55060	DLEGSDIDTRR	373	NO	1	1.01057	0.965565	0.937189	0.961812	1.27091	46.6573	0.9532	0.97502	1.27428	0.268986	2.53026	-0.0624515	0.417025
SPTBN2	Spectrin beta chain	O15020	VQAVDAVAAELAAER	481	NO	1	1.17195	1.21635	1.21485	1.21123	1.26694	0.00579496	0.9729	0.999769	1.34952	0.239317	1.62288	0.269973	2.19083
GCN1	Stalled ribosome sensor GCN1	Q92616	VVLPYLVPK	2075	NO	1	1.01606	1.01348	1.0571	1.09567	1.27427	18.5112	0.9714	1.01746	1.3027	0.271681	2.75036	0.0690673	0.622701
IARS1	Isoleucine--tRNA ligase	P41252	SDTPLIYK	403	NO	1	1.02978	0.959565	0.968225	1.05661	1.25267	15.0381	0.9474	0.989381	1.25443	0.272925	2.93952	0.0971406	0.785282
ETFA	Electron transfer flavoprotein subunit alpha	P13804	AAVDAGFVPNDMQVGQTGK	250	NO	1	0.945744	1.04573	1.09676	1.1525	1.26944	5.72812	0.9365	0.976439	1.33056	0.273449	2.91292	0.138845	1.29322
ATXN10	Ataxin-10	Q9UBB4	VTLLDLMIAK	244	NO	1	0.990273	1.08413	1.09329	1.12887	1.26787	5.79447	0.9024	0.993318	1.316	0.274029	2.23921	0.195253	1.27853
UBA2	SUMO-activating enzyme subunit 2	Q9UBT2	LFKDDIR	258	NO	1	1.06257	1.0328	0.997577	1.05589	1.25106	22.9813	0.936	1.02338	1.25957	0.276672	3.4875	0.0559207	0.87158
GCN1	Stalled ribosome sensor GCN1	Q92616	AYSDQAIVNLLK	2610	NO	1	1.08182	1.01749	1.00973	1.06305	1.27498	17.3363	0.9227	1.02724	1.27583	0.27692	2.47474	0.0376099	0.266887
EIF5B	Eukaryotic translation initiation factor 5B	O60841	CPFIVALNK	749	NO	1	1.01615	0.931653	0.981514	1.04672	1.27356	13.2103	0.944	0.982328	1.27358	0.278874	2.03317	0.0687804	0.341226
ATP6V1H	V-type proton ATPase subunit H	Q9UI12	TFINLMTHICK	76	NO	1	0.918147	1.0479	1.07753	1.21333	1.25712	1.74756	0.9212	0.969104	1.27774	0.283107	2.21095	0.26523	2.18669
GALK1	Galactokinase	P51570	HVVGEIR	280	NO	1	1.06454	1.12233	1.1689	1.15904	1.26866	0.448084	0.9254	0.995621	1.29197	0.284203	2.96641	0.238052	1.89403
KARS1	Lysine--tRNA ligase	Q15046	VAMFLTDSNNIK	554	NO	1	0.979287	1.19473	1.22158	1.28742	1.28696	0.071871	0.9677	0.989426	1.26537	0.242924	1.55471	0.284477	2.66636
GET3	ATPase GET3	O43681	LEETLPVIR	222	NO	1	1.04531	1.05856	1.10628	1.14121	1.25853	3.12557	0.9413	1.00278	1.28616	0.28453	2.68838	0.0964352	0.531517
LARS1	Leucine--tRNA ligase	Q9P2J5	TGFFEFQAAKDKYR	823	NO	1	0.986866	1.03726	0.929465	1.04223	1.28678	18.671	0.922	0.988559	1.29145	0.285096	2.29905	0.0560739	0.325794
MACROH2A1	Core histone macro-H2A	O75367	GVTIASGGVLPNIHPELLAK	97	NO	1	1.07769	1.05664	1.05252	1.08528	1.28808	14.1009	0.9345	1.04673	1.28811	0.288324	2.34139	0.0511938	0.291016
CPNE3	Copine-3	O75131	ISLNSLCYGDMDK	196	NO	1	0.946844	1.07713	1.15661	1.23343	1.3105	0.856431	0.9535	0.973245	1.31855	0.305541	2.58436	0.290335	3.93748
NLRP2	NACHT	Q9NX02	MLFETLTCSSGTLR	1001	NO	1	0.832968	1.04353	0.976216	1.21484	1.96109	22.301	0.97	0.960121	2.06694	0.758668	2.67794	0.292825	3.04822
CLTC	Clathrin heavy chain 1	Q00610	ALEHFTDLYDIKR	626	NO	1	1.02816	1.0355	1.0811	1.05936	1.27694	15.2892	0.9325	1.03616	1.27694	0.293592	3.71296	0.064364	0.793685
GCN1	Stalled ribosome sensor GCN1	Q92616	SLVSGLIR	2192	NO	1	1.04398	0.962457	1.05524	1.05329	1.30734	14.9668	0.9264	1.01541	1.30738	0.294245	2.89622	0.0517517	0.317171
POLR1G	DNA-directed RNA polymerase I subunit RPA34	O15446	HVPLSGSQIVK	60	NO	1	1.01872	1.15636	1.1842	1.32181	1.27572	0.164128	0.9361	0.993105	1.30165	0.253885	1.9172	0.2947	2.13363
IPO5	Importin-5	O00410	VCDIAAELAR	109	NO	1	0.94284	0.97589	1.07656	1.07682	1.31067	21.7283	0.9038	0.979327	1.39261	0.298578	2.18433	0.110139	0.773401
ITCH	E3 ubiquitin-protein ligase Itchy homolog	Q96J02	FWCQQLAMPQHIK	537	NO	1	0.945878	1.17259	1.06657	1.2981	1.56779	14.6036	0.9007	1.01919	1.69243	0.420107	1.27082	0.298962	2.42052
TALDO1	Transaldolase	P37837	LLGELLQDNAK	259	NO	1	1.02726	0.9935	0.990152	1.07504	1.25958	14.2035	0.9841	1.0027	1.26094	0.299281	2.63062	0.143486	2.13636
LARS1	Leucine--tRNA ligase	Q9P2J5	SGPASTFNDRVFASELNAGIIK	786	NO	1	1.02304	1.08435	1.02745	1.07043	1.29574	14.5311	0.9347	1.03357	1.29567	0.300795	2.78295	0.0850337	0.685479
LRPPRC	Leucine-rich PPR motif-containing protein	P42704	LVEKGETDLIQK	865	NO	1	0.996982	1.04984	1.04021	1.0719	1.26044	18.3786	0.9539	1.02149	1.2662	0.300817	4.35922	0.0690248	0.903243
TNPO1	Transportin-1	Q92973	LIPVLVNGMK	308	NO	1	0.945233	1.02269	1.14099	1.33996	1.44568	2.52112	0.9898	0.973469	1.4733	0.341041	1.38652	0.30421	2.06594
RNF213	E3 ubiquitin-protein ligase RNF213	Q63HN8	LVESISLDENGTR	2601	NO	1	0.982657	0.994372	0.959671	1.07425	1.293	12.3444	0.9877	0.98419	1.29307	0.306413	3.29048	0.100161	0.837065
PFKM	ATP-dependent 6-phosphofructokinase	P08237	LPLMECVQVTK	346	NO	1	0.907624	0.997288	1.09368	1.12801	1.33835	10.0386	0.9053	0.958615	1.40922	0.309342	2.05651	0.204957	1.22215
ACACA	Acetyl-CoA carboxylase 1	Q13085	TFEDFVR	1241	NO	1	0.979506	1.01701	1.09328	1.08905	1.3268	17.4492	0.9101	1.02164	1.33264	0.309865	2.14587	0.0383974	0.180877
UCHL5	Ubiquitin carboxyl-terminal hydrolase isozyme L5	Q9Y5K5	WQPGEEPAGSVVQDSR	58	NO	1	0.974106	1.05834	1.18088	1.25396	1.34756	1.12703	0.9799	0.980578	1.36055	0.301287	1.7213	0.309907	2.28715
CASP8	Caspase-8	Q14790	FLSLDYIPQRK	24	NO	1	1.09034	1.0217	1.11325	1.19913	1.29502	3.85852	0.9151	1.02899	1.31023	0.311926	2.06994	0.201153	1.27194
DDX6	Probable ATP-dependent RNA helicase DDX6	P26196	SGAYLIPLLER	147	NO	1	1.02798	0.997772	1.0921	1.13194	1.31802	15.4626	0.9518	1.00848	1.38348	0.311968	2.28419	0.10192	0.604264
HMGB1	High mobility group protein B1	P09429	MSSYAFFVQTCR	13	NO	1	0.920294	1.01025	1.09045	1.23557	1.2623	1.35846	0.9574	0.966586	1.27043	0.250241	2.14758	0.313873	2.92269
GATC	Glutamyl-tRNA(Gln) amidotransferase subunit C	O43716	SDNVVEGNCADELLQNSHR	91	NO	1	1.01157	1.05196	1.09006	1.05615	1.29179	15.9042	0.9119	1.03821	1.29175	0.315754	3.59664	0.0850656	1.0563
GATB	Glutamyl-tRNA(Gln) amidotransferase subunit B	O75879	LFSGSQVR	81	NO	1	1.04026	1.02089	1.02625	1.14634	1.25102	9.10671	0.9831	1.02026	1.25525	0.315927	3.5115	0.144834	1.54997
ETF1	Eukaryotic peptide chain release factor subunit 1	P62495	FTVDLPK	172	NO	1	1.01217	1.03235	1.04714	1.12079	1.25039	9.79957	0.9784	1.01172	1.26924	0.317352	3.71765	0.101762	0.976106
PCNT	Pericentrin	O95613	LLADQER	1805	NO	1	1.07636	1.09573	1.20394	1.25092	1.33229	0.795072	0.9835	0.9997	1.37227	0.318356	2.19486	0.234849	1.91346
FLNB	Filamin-B	O75369	LTVMSLQESGLK	2290	NO	1	0.958736	1.15241	1.17436	1.32135	1.38508	0.934929	0.935	0.978156	1.42271	0.275577	0.949479	0.319226	2.5852
PPP2R1A	Serine/threonine-protein phosphatase 2A 65 kDa regulatory subunit A alpha isoform	P30153	VLELDNVK	195	NO	1	0.971196	0.99164	1.09382	1.00151	1.33512	22.8187	0.9061	1.01151	1.33511	0.319818	2.15653	0.0175816	0.0638335
ACACA	Acetyl-CoA carboxylase 1	Q13085	ATLVDHGIR	1317	NO	1	1.05855	1.00016	0.954131	1.09905	1.32862	13.3765	0.9395	1.00321	1.3294	0.319903	2.32055	0.0505292	0.230257
HSP90AB1	Heat shock protein HSP 90-beta	P08238	YESLTDPSK	56	NO	1	0.991785	1.01147	1.0806	1.11994	1.35017	21.321	0.9629	1.00513	1.43356	0.320029	2.23231	0.055531	0.229327
DYNC1H1	Cytoplasmic dynein 1 heavy chain 1	Q14204	LFLTMEINPK	4124	NO	1	0.853017	0.990105	1.24378	1.29228	1.29276	0.289122	0.9372	0.927898	1.29184	0.24123	1.2654	0.32073	2.41419
DYNC1H1	Cytoplasmic dynein 1 heavy chain 1	Q14204	INEWLTLVEKEMR	1698	NO	1	1.03609	1.03891	1.0796	1.16744	1.34463	8.54138	0.9694	1.01851	1.367	0.357291	1.28401	0.320731	2.25007
PPM1A	Protein phosphatase 1A	P35813	VCNEVVDTCLYK	267	NO	1	1.03312	1.13005	1.16723	1.1622	1.2549	0.441055	0.9198	0.994782	1.27697	0.321618	2.46354	0.275093	1.93961
GSTM3	Glutathione S-transferase Mu 3	P21266	IRVDIIENQVMDFR	99	NO	1	0.937319	1.11299	1.15688	1.32019	1.34058	0.720375	0.9364	0.9729	1.36392	0.448377	2.49955	0.32293	2.52581
CRAT	Carnitine O-acetyltransferase	P43155	LPVPPLQQSLDHYLK	38	NO	1	0.980643	0.999155	1.07561	1.06264	1.32329	15.0521	0.9351	1.01389	1.32345	0.325414	2.96858	0.0454046	0.377402
NFU1	NFU1 iron-sulfur cluster scaffold homolog	Q9UMS0	GFEDGIVQLK	196	NO	1	1.1437	1.07224	1.27397	1.35969	1.36133	0.658681	0.9113	1.06999	1.36081	0.325781	2.09335	0.285528	1.47113
EXOC4	Exocyst complex component 4	Q96A65	LIPPQDILR	694	NO	1	0.988383	1.05554	1.05041	1.10648	1.35228	13.5569	0.9608	1.02354	1.35249	0.329327	2.25345	0.0421905	0.183773
TBRG4	FAST kinase domain-containing protein 4	Q969Z0	LSFHQTQVSQR	305	NO	1	1.07203	1.01382	1.08523	1.09545	1.32736	14.5983	0.9241	1.04269	1.32745	0.329693	3.21339	0.0520446	0.360845
GCN1	Stalled ribosome sensor GCN1	Q92616	CLQNPSSDIR	2558	NO	1	1.0843	1.0707	1.06458	1.18457	1.3505	9.24314	0.9392	1.04905	1.34853	0.330766	2.33887	0.160144	1.1098
MVK	Mevalonate kinase	Q03426	MLSEVLLVSAPGK	1	NO	1	0.925965	0.995986	1.06839	1.31889	1.44181	4.0052	0.9853	0.968302	1.46293	0.389664	2.04715	0.33102	3.00423
ANXA3	Annexin A3	P12429	MLISILTER	40	NO	1	0.916059	1.13608	1.24689	1.25682	1.33059	0.0934632	0.941	0.957971	1.27816	0.301747	1.90728	0.331111	2.3041
RUVBL2	RuvB-like 2	Q9Y230	AAGVVLEMIR	55	NO	1	1.04031	1.29676	1.25296	1.34863	1.35214	0.0269594	0.9482	0.999549	1.31862	0.270134	1.17423	0.331489	2.23755
LONP1	Lon protease homolog	P36776	TENPLILIDEVDKIGR	582	NO	1	1.04037	1.12292	1.16421	1.17621	1.25863	0.486101	0.9556	0.995399	1.28458	0.333994	2.90707	0.134893	0.822599
RELCH	RAB11-binding protein RELCH	Q9P260	QMILTGCVAFAR	579	NO	1	0.899423	0.970821	1.09817	1.2688	1.40951	3.88243	0.9676	0.947511	1.44619	0.287675	0.9754	0.334727	2.03828
GATB	Glutamyl-tRNA(Gln) amidotransferase subunit B	O75879	SQTLIDLNR	204	NO	1	0.939528	0.956087	0.958356	1.03088	1.25917	16.012	0.9723	0.963453	1.26163	0.335224	3.73906	0.102789	1.19529
MYH9	Myosin-9	P35579	VISGVLQLGNIVFKK	342	NO	1	1.02986	1.06078	1.06353	1.07234	1.30221	14.3088	0.9543	1.03856	1.30223	0.335604	3.84668	0.0929384	0.816232
ACSS2	Acetyl-coenzyme A synthetase	Q9NR19	GATTNICYNVLDR	98	NO	1	0.930397	0.996342	0.951911	1.0149	1.25503	16.7984	0.9492	0.969637	1.25592	0.336258	2.51854	0.048246	0.245917
RPS6KA3	Ribosomal protein S6 kinase alpha-3	P51812	YGQHPNIITLK	470	NO	1	1.03196	0.979652	1.0504	1.07838	1.27115	14.7523	0.9457	1.01542	1.27214	0.336913	3.04692	0.0911967	0.703067
SMAD2	Mothers against decapentaplegic homolog 2	Q15796	YGWHPATVCK	366	NO	1	1.04106	1.1657	1.15837	1.18602	1.27769	0.846938	0.9043	0.995393	1.33169	0.238718	0.637969	0.338398	2.1236
PRPF8	Pre-mRNA-processing-splicing factor 8	Q6P2Q9	QILMASGSTTFTK	1246	NO	1	0.950514	1.03518	0.973446	1.27948	1.30731	5.68123	0.9687	0.989719	1.30723	0.263644	1.72884	0.33854	2.45712
CLTC	Clathrin heavy chain 1	Q00610	VKQLPLVKPYLR	1442	NO	1	0.943399	1.02826	1.00629	1.07498	1.26263	12.7418	0.9368	0.994466	1.26282	0.340035	3.05178	0.135708	1.38029
HNRNPU	Heterogeneous nuclear ribonucleoprotein U	Q00839	RKMCLFAGFQR	591	NO	1	1.00019	0.988111	1.11826	1.25737	1.31579	1.76115	0.9926	0.991514	1.31558	0.341541	3.02101	0.230317	1.52977
CLTC	Clathrin heavy chain 1	Q00610	SVNESLNNLFITEEDYQALR	1462	NO	1	1.05737	1.08103	1.06246	1.05147	1.36426	17.488	0.957	1.04944	1.36422	0.341682	2.5805	-0.0197023	0.102165
MTOR	Serine/threonine-protein kinase mTOR	P42345	YDVLICR	1209	NO	1	1.02481	0.962204	1.04409	1.14181	1.25166	8.60397	0.9565	0.99688	1.27736	0.341826	2.77091	0.106105	0.6164
PSME2	Proteasome activator complex subunit 2	Q9UL46	CGFLPGNEK	91	NO	1	1.05811	0.954997	1.0199	1.01451	1.32544	18.3683	0.9377	1.00807	1.32544	0.342005	2.19851	0.128957	0.542866
MVK	Mevalonate kinase	Q03426	SPALQILLTNTKVPR	227	NO	1	0.951934	0.898162	0.986405	1.15233	1.25057	5.97639	0.9393	0.951535	1.25794	0.342801	2.75264	0.146101	1.42002
SMARCA5	SWI/SNF-related matrix-associated actin-dependent regulator of chromatin subfamily A member 5	O60264	LGFDKENVYDELR	962	NO	1	1.10503	1.05637	1.09489	1.20285	1.35118	5.17552	0.9049	1.04471	1.34672	0.34391	2.39656	0.224675	1.65326
NAA15	N-alpha-acetyltransferase 15	Q9BXJ9	GCPPVFNTLR	321	NO	1	1.00039	1.05216	1.02495	1.17502	1.27033	7.45377	0.9709	1.01672	1.27451	0.344232	3.50119	0.253767	3.37806
EEF1A2	Elongation factor 1-alpha 2	Q05639	EVSAYIK	173	NO	1	1.06545	1.01151	1.01307	1.07654	1.27112	14.3416	0.9508	1.02247	1.27133	0.345138	2.91326	0.0847772	0.631232
SNX8	Sorting nexin-8	Q9Y5X2	FVNLVAR	155	NO	1	1.07916	0.996833	1.0361	1.03881	1.28	19.5661	0.9215	1.02786	1.28013	0.346076	2.68545	0.040876	0.213056
ATP6V1A	V-type proton ATPase catalytic subunit A	P38606	VGSHITGGDIYGIVSENSLIK	143	NO	1	1.08496	1.07198	1.0635	1.02548	1.34825	20.2954	0.9369	1.04904	1.34819	0.34739	2.60597	0.00533045	0.0180661
MVD	Diphosphomevalonate decarboxylase	P53602	ASVETSPLLR	217	NO	1	1.01096	1.014	1.06292	1.05213	1.27975	15.2495	0.9581	1.02192	1.27975	0.353627	2.52502	-0.022994	0.118534
MYO6	Unconventional myosin-VI	Q9UM54	LSFISVGNKFK	638	NO	1	0.995395	1.1877	1.2928	1.28549	1.50004	3.07221	0.9076	0.980692	1.62409	0.401813	1.6288	0.353657	2.16602
NAP1L1	Nucleosome assembly protein 1-like 1	P55209	QLTVQMMQNPQILAALQER	37	NO	1	1.09576	1.1182	1.23771	1.38196	1.31746	0.278562	0.937	1.01822	1.36308	0.234298	1.02064	0.35387	2.20838
GSTM3	Glutathione S-transferase Mu 3	P21266	FSWFAGEK	149	NO	1	1.02452	1.098	1.10498	1.23802	1.35158	3.75717	0.9667	1.00495	1.40032	0.373255	1.23024	0.355253	2.11511
QRSL1	Glutamyl-tRNA(Gln) amidotransferase subunit A	Q9H0R6	FDGLQYGHR	342	NO	1	0.996155	1.01996	1.04463	1.02204	1.30135	23.0667	0.9785	1.01512	1.30181	0.35595	2.38305	0.0995953	0.766946
METTL16	RNA N6-adenosine-methyltransferase METTL16	Q86W50	LIPTVPLR	75	NO	1	0.945512	0.922595	1.15458	1.16475	1.26022	0.6832	0.9178	0.955969	1.21267	0.355995	3.01296	0.177439	0.74373
KDM1A	Lysine-specific histone demethylase 1A	O60341	IADQFLGAMYTLPR	825	NO	1	0.847537	0.99701	1.01839	1.17706	1.34703	9.25101	0.9041	0.939175	1.41697	0.357364	3.64033	0.165526	1.51481
BZW1	eIF5-mimic protein 2	Q7L1Q6	DINAVAASLRK	198	NO	1	0.978793	1.09184	1.15198	1.15473	1.26175	1.09318	0.9037	0.984304	1.28145	0.357934	2.84641	0.30943	2.56419
ZMYM3	Zinc finger MYM-type protein 3	Q14202	FYEFYLSK	1299	NO	1	1.06738	1.13069	1.13298	1.2789	1.38187	3.73794	0.9613	1.00799	1.46933	0.358498	2.16048	0.320402	2.07965
TALDO1	Transaldolase	P37837	LVPVLSAK	270	NO	1	1.03501	1.02889	1.11857	1.16475	1.3695	5.50481	0.9309	1.00423	1.38532	0.358765	2.77552	0.16694	1.84964
SMC4	Structural maintenance of chromosomes protein 4	Q9NTJ3	VAELDKITYER	1107	NO	1	1.04168	1.03161	1.09588	1.14061	1.33984	12.389	0.9464	1.02096	1.38196	0.358961	3.49546	0.144631	1.45888
RARS1	Arginine--tRNA ligase	P54136	GFDILGIKPVQR	648	NO	1	1.0421	1.08917	1.05789	1.10222	1.36425	13.8526	0.9512	1.04722	1.36422	0.361632	3.21834	0.0929096	1.2788
HUWE1	E3 ubiquitin-protein ligase HUWE1	Q7Z6Z7	ITPAMAAR	1038	NO	1	0.989275	1.03335	1.08638	1.12055	1.26191	13.4555	0.9603	0.995029	1.33878	0.36245	3.44491	0.167639	1.25274
USP7	Ubiquitin carboxyl-terminal hydrolase 7	Q93009	FLTLPPVLHLQLMR	395	NO	1	0.906032	1.03597	1.31276	1.28725	1.45817	0.29956	0.9191	0.952106	1.37815	0.421673	2.11128	0.363028	2.4158
EPRS1	Bifunctional glutamate/proline--tRNA ligase	P07814	AALLNQHYQVNFK	217	NO	1	1.0178	0.973006	0.941206	0.99133	1.27107	27.5497	0.9534	0.98301	1.2743	0.363075	4.93663	0.0134282	0.0972717
KIF5B	Kinesin-1 heavy chain	P33176	FVCSPDEVMDTIDEGKSNR	172	NO	1	1.04572	1.07831	1.0535	1.11742	1.32379	12.8822	0.9514	1.04439	1.32387	0.363773	4.96088	0.113555	1.39999
CAND1	Cullin-associated NEDD8-dissociated protein 1	Q86VP6	GYLISGSSYAR	972	NO	1	1.00458	0.979691	1.00528	1.0054	1.26052	21.4509	0.9924	0.997346	1.26078	0.363973	3.39656	0.0970213	0.718438
OSBPL8	Oxysterol-binding protein-related protein 8	Q9BZF1	VVLPTFILEPR	423	NO	1	1.01157	1.06023	1.03479	1.05617	1.32553	16.4829	0.9713	1.02666	1.32564	0.36403	3.11142	0.138643	1.23451
DYNC1H1	Cytoplasmic dynein 1 heavy chain 1	Q14204	ILDDDTIITTLENLKR	3760	NO	1	0.947716	1.0352	1.08099	1.14715	1.27911	7.26841	0.9479	0.977903	1.33852	0.364878	2.06528	0.159804	0.581427
PARN	Poly(A)-specific ribonuclease PARN	O95453	LIEPFFNK	414	NO	1	1.0459	1.0435	1.16331	1.2155	1.37811	3.22381	0.9581	1.00125	1.41055	0.365134	2.39107	0.193072	1.23724
RARS2	Probable arginine--tRNA ligase	Q5T160	IVVEFSSPNVAK	127	NO	1	1.01048	0.951129	1.06912	1.10344	1.28781	18.1746	0.9254	0.992773	1.35365	0.365301	3.42989	0.0793581	0.627737
GCN1	Stalled ribosome sensor GCN1	Q92616	GVTSILPVLR	2260	NO	1	1.02772	1.08777	1.06881	1.16719	1.37784	17.0013	0.9563	1.0388	1.42561	0.368408	2.73332	0.145637	1.00371
HNRNPUL1	Heterogeneous nuclear ribonucleoprotein U-like protein 1	Q9BUJ2	WMGIAFR	351	NO	1	0.933519	1.19486	1.19746	1.30717	1.33821	0.0754306	0.901	0.966651	1.281	0.277408	1.28792	0.368763	2.63868
CSNK2A1	Casein kinase II subunit alpha	P68400	LIDWGLAEFYHPGQEYNVR	173	NO	1	1.0928	1.03883	1.06882	1.09152	1.40453	19.0792	0.9546	1.05	1.40651	0.370024	2.02321	0.0822466	0.346684
SF3B1	Splicing factor 3B subunit 1	O75533	EIISNLAK	595	NO	1	0.969575	0.981016	1.03012	0.961546	1.29276	62.5068	0.9625	0.98845	1.3084	0.372373	3.11388	0.0310687	0.162779
ECH1	Delta(3	Q13011	TVTFSKL	322	NO	1	1.00233	1.00204	1.01419	1.01358	1.31205	20.5624	0.9984	1.00463	1.31219	0.37315	3.98518	0.0948018	0.79519
RNF213	E3 ubiquitin-protein ligase RNF213	Q63HN8	ILANVTEDAKR	1070	NO	1	1.02161	1.09269	1.14195	1.22935	1.27496	1.06687	0.9929	0.996966	1.31152	0.373917	2.04801	0.326988	1.85601
RAP1GDS1	Rap1 GTPase-GDP dissociation stimulator 1	P52306	MDNLSDTLKK	1	NO	1	1.03424	1.12213	1.0881	1.20464	1.35375	8.34095	0.9203	1.01646	1.42858	0.374415	2.46748	0.204034	1.19548
AACS	Acetoacetyl-CoA synthetase	Q86V21	SDGTLNPNGVR	540	NO	1	1.01262	0.983442	0.984302	1.12849	1.29603	10.8986	0.9923	0.994992	1.29678	0.374665	3.1971	0.116639	0.517947
SEC31A	Protein transport protein Sec31A	O94979	LVTFENVR	404	NO	1	0.909969	0.89895	0.984779	0.954218	1.28425	32.0399	0.9219	0.948392	1.29076	0.377044	2.52446	0.0619879	0.228262
RAB11B	Ras-related protein Rab-11B	Q15907	ELRDHADSNIVIMLVGNK	108	NO	1	0.943579	1.27026	1.18935	1.27563	1.27977	0.0328906	0.9362	0.97157	1.25392	0.0755665	0.123012	0.377235	2.32435
CSE1L	Exportin-2	P55060	FQSGDFHVINGVLR	138	NO	1	0.975648	1.04378	1.04757	1.05354	1.37064	19.4758	0.9652	1.01669	1.37242	0.377651	3.44261	0.082326	0.431871
ACACA	Acetyl-CoA carboxylase 1	Q13085	RWFVEVEGTVK	2250	NO	1	1.09081	1.11612	1.17707	1.35577	1.43076	2.31446	0.9759	1.0147	1.50907	0.286414	0.578296	0.378338	2.35224
PSMD5	26S proteasome non-ATPase regulatory subunit 5	Q16401	ILTLSQIGR	101	NO	1	0.979125	1.00103	1.01785	1.06012	1.35066	16.1419	0.9924	0.999472	1.35154	0.379698	4.51288	0.0230552	0.161891
SET	Protein SET	Q01105	VEVTEFEDIK	123	NO	1	1.00454	0.982306	1.06019	1.05365	1.32037	17.4555	0.9574	1.01176	1.3213	0.3806	3.6538	0.0435914	0.30582
DIP2B	Disco-interacting protein 2 homolog B	Q9P265	TPLGGIHISQTK	907	NO	1	1.00873	1.08097	1.12408	1.2007	1.33384	3.93277	0.9734	0.99512	1.3858	0.381886	3.27232	0.225729	1.80719
HUWE1	E3 ubiquitin-protein ligase HUWE1	Q7Z6Z7	YICQKPSIQK	697	NO	1	1.07065	1.05461	1.09671	1.18194	1.30453	3.14308	0.9283	1.02098	1.30835	0.382935	2.8749	0.236015	1.82334
IARS1	Isoleucine--tRNA ligase	P41252	FLIQNVLR	662	NO	1	1.04401	1.06166	1.04884	1.09227	1.32854	14.0112	0.9689	1.03862	1.32858	0.383177	3.28274	0.0901061	0.683418
CDC42BPB	Serine/threonine-protein kinase MRCK beta	Q9Y5S2	LADFGSCLK	216	NO	1	0.996435	1.01365	1.03384	1.04647	1.29825	16.7807	0.9872	1.01097	1.29858	0.383386	3.11901	0.16328	0.970452
P4HB	Protein disulfide-isomerase	P07237	VHSFPTLK	437	NO	1	0.963895	0.99078	1.09186	1.29189	1.38776	3.17192	0.995	0.97946	1.40341	0.386824	2.69176	0.372407	2.4354
IARS1	Isoleucine--tRNA ligase	P41252	LYLINSPVVR	625	NO	1	1.05276	1.03826	1.04787	1.12734	1.32295	12.5876	0.9752	1.03465	1.3232	0.387193	3.27183	0.0972129	0.711924
VCP	Transitional endoplasmic reticulum ATPase	P55072	NVFIIGATNRPDIIDPAILRPGR	616	NO	1	0.918869	1.22348	1.38992	1.25247	1.32809	0.0769098	0.9263	0.959377	1.3235	0.38722	2.05175	0.195792	1.17534
HSP90AA1	Heat shock protein HSP 90-alpha	P07900	ELISNSSDALDKIR	47	NO	1	0.873923	0.887693	0.985136	1.06756	1.29218	36.1325	0.906	0.92511	1.46189	0.387295	3.71224	0.0581639	0.219442
ACSF2	Medium-chain acyl-CoA ligase ACSF2	Q96CM8	LNTPGELCIR	455	NO	1	1.0592	1.02132	1.09354	1.2136	1.33468	6.13119	0.975	1.02091	1.36452	0.387337	4.68165	0.258259	3.23948
MYH9	Myosin-9	P35579	ALELDSNLYR	746	NO	1	1.02315	1.10956	1.05217	1.19561	1.34964	11.2145	0.9244	1.04021	1.37573	0.387583	2.48459	0.0970792	0.341592
DNAAF5	Dynein axonemal assembly factor 5	Q86Y56	SVDDVLSHFAQR	242	NO	1	0.924307	0.869683	0.977057	1.03902	1.31908	47.7381	0.9227	0.937798	1.50746	0.389883	2.2241	0.065025	0.216552
NUP205	Nuclear pore complex protein Nup205	Q92621	IQQGALELLR	1566	NO	1	1.00361	0.978139	1.05308	1.07926	1.3111	14.2757	0.9606	1.00866	1.31152	0.389895	4.3933	0.0503023	0.382468
ARFIP2	Arfaptin-2	P53365	LEYDAYRTDLEELSLGPR	233	NO	1	1.06221	0.974772	0.944189	0.953513	1.40236	69.7613	0.9415	0.986935	1.45823	0.390001	2.95629	-0.0998971	0.583557
UGGT1	UDP-glucose:glycoprotein glucosyltransferase 1	Q9NYU2	ILETTTFFQR	659	NO	1	0.880318	0.960517	1.01949	1.06876	1.33074	13.2119	0.9045	0.965025	1.33113	0.39027	2.35066	0.0511895	0.17509
RARS1	Arginine--tRNA ligase	P54136	EIAENITK	136	NO	1	0.947649	1.01712	0.988203	1.07568	1.40342	14.8869	0.9814	0.98823	1.40415	0.39104	2.93803	0.0901838	0.723097
PRKDC	DNA-dependent protein kinase catalytic subunit	P78527	VIAGLYQR	3373	NO	1	1.03231	1.04048	1.19273	1.17715	1.30713	2.37217	0.9144	0.994344	1.35222	0.391093	3.40104	0.146818	0.964991
CSE1L	Exportin-2	P55060	DLEGSDIDTR	373	NO	1	1.02724	0.979061	1.03543	1.09122	1.27889	12.7472	0.9668	1.01039	1.27905	0.391467	3.36491	0.0728687	0.693838
THOC7	THO complex subunit 7 homolog	Q6I9Y2	WCNSGSQEEGYSQYQR	37	NO	1	0.994095	0.958965	1.02881	0.972237	1.30241	42.7434	0.9654	0.990818	1.30352	0.392029	2.01105	0.0808378	0.278436
ALDH7A1	Alpha-aminoadipic semialdehyde dehydrogenase	P49419	VNLLSFTGSTQVGK	267	NO	1	1.02163	1.06962	1.09738	1.04778	1.33483	17.6869	0.9209	1.04632	1.33478	0.39289	2.83725	0.0536614	0.216839
DDX59	Probable ATP-dependent RNA helicase DDX59	Q5T1V6	GLDLISVR	508	NO	1	1.04218	1.05321	1.13968	1.18558	1.3106	3.13248	0.9688	1.00269	1.34781	0.393948	2.08614	0.24925	1.25739
ATP6V1A	V-type proton ATPase catalytic subunit A	P38606	LASFYER	382	NO	1	1.07738	1.06641	1.08968	1.17968	1.37483	7.58746	0.9251	1.03981	1.37675	0.394916	3.97698	0.14182	1.06771
CAMK2G	Calcium/calmodulin-dependent protein kinase type II subunit gamma	Q13555	GAILTTMLVSR	302	NO	1	1.05805	1.08981	1.06516	1.27117	1.41633	7.44399	0.9678	1.04701	1.42534	0.394989	2.70367	0.251268	2.11172
XPO4	Exportin-4	Q9C0E2	VMELFFTVHR	274	NO	1	1.06448	1.07661	1.29503	1.3964	1.29301	0.316557	0.9419	1.03098	1.34426	0.273891	1.23115	0.395066	2.03998
MCCC1	Methylcrotonoyl-CoA carboxylase subunit alpha	Q96RQ3	VLIANRGEIACR	52	NO	1	1.04446	1.02377	1.01957	1.13984	1.28999	11.1294	0.9838	1.02176	1.29154	0.395549	3.7662	0.136046	1.53435
YWHAG	14-3-3 protein gamma	P61981	NCSETQYESK	111	NO	1	1.07449	1.07018	1.05958	1.24366	1.34621	5.83064	0.9589	1.04486	1.34576	0.395889	2.11559	0.304981	1.79558
PRKDC	DNA-dependent protein kinase catalytic subunit	P78527	GYGLFAGPCK	365	NO	1	1.02477	1.04559	1.04821	1.11009	1.39381	15.0866	0.9861	1.0296	1.39489	0.396109	4.09895	0.095564	1.11513
MDN1	Midasin	Q9NU22	GLSLGFLEK	2897	NO	1	0.951267	1.01609	1.01328	1.08467	1.38648	13.6469	0.9783	0.995149	1.38664	0.397178	2.65214	0.0926631	0.470926
MYH9	Myosin-9	P35579	TDLLLEPYNKYR	290	NO	1	0.97054	1.0143	0.962239	1.07569	1.30965	14.0889	0.9789	0.986726	1.31088	0.397846	3.78396	0.110715	0.914495
ACTN4	Alpha-actinin-4	O43707	VLAGDKNFITAEELR	854	NO	1	0.933933	1.01619	0.997828	1.02991	1.25716	15.1103	0.9367	0.986999	1.2573	0.399556	3.76076	0.104372	0.904596
CLTC	Clathrin heavy chain 1	Q00610	IAAYLFKGNNR	1510	NO	1	1.0474	1.026	1.11078	1.1314	1.40908	14.2422	0.9403	1.04597	1.40957	0.400642	2.5019	0.147396	0.748129
EXOC7	Exocyst complex component 7	Q9UPT5	EHIEQQIQTYQR	610	NO	1	0.863299	0.925427	1.05064	1.14555	1.31097	7.02157	0.9046	0.92705	1.36084	0.401704	2.06495	0.183594	0.754803
ACACA	Acetyl-CoA carboxylase 1	Q13085	YLYLTPQDYKR	1750	NO	1	0.961577	1.00993	1.04341	1.0917	1.35922	19.3644	0.9692	1.00178	1.38207	0.401735	3.30411	0.177061	2.53927
ATP6V1A	V-type proton ATPase catalytic subunit A	P38606	LIKDDFLQQNGYTPYDR	514	NO	1	0.927942	0.962269	1.01665	1.06795	1.32467	13.6113	0.9537	0.97666	1.32505	0.401801	2.42587	0.0978019	0.387312
KAT14	Cysteine-rich protein 2-binding protein	Q9H8E8	LQLLSQIR	613	NO	1	0.891806	1.06146	1.03785	1.22903	1.36076	6.17977	0.9075	0.967625	1.41336	0.4056	1.98847	0.402214	2.69353
ACACA	Acetyl-CoA carboxylase 1	Q13085	IGLAEEIR	1724	NO	1	1.07021	1.0139	1.09601	1.11858	1.37632	14.0139	0.9338	1.04498	1.3765	0.402631	4.77376	0.163995	1.79505
RAB18	Ras-related protein Rab-18	Q9NP72	NDIVNMLVGNKIDKENR	113	NO	1	0.974359	0.994759	1.02452	1.07547	1.26958	12.774	0.9789	0.998401	1.26969	0.404325	3.35327	0.103663	0.736969
MCM5	DNA replication licensing factor MCM5	P33992	CVDFQTLK	221	NO	1	1.06632	0.974523	1.00936	1.17981	1.3073	9.05516	0.9462	1.01236	1.3077	0.40483	2.63473	0.350017	2.30382
EIF3E	Eukaryotic translation initiation factor 3 subunit E	P60228	WIVNLIR	370	NO	1	1.03045	1.14186	1.13778	1.18571	1.33286	1.98089	0.9015	0.993145	1.37465	0.404958	2.63441	0.208612	1.44111
CLTC	Clathrin heavy chain 1	Q00610	LLYNNVSNFGR	1216	NO	1	0.977787	0.898025	0.965391	0.95619	1.25868	30.8063	0.9278	0.959435	1.25883	0.404968	4.01188	0.0179667	0.0870389
SEC31A	Protein transport protein Sec31A	O94979	LITAVVMK	628	NO	1	0.933447	1.05772	1.01258	1.04462	1.34003	12.6744	0.9211	1.00094	1.34003	0.406237	2.58397	0.0775751	0.407143
SET	Protein SET	Q01105	EFHLNESGDPSSK	155	NO	1	1.0532	1.0096	1.03422	1.06174	1.38559	15.2732	0.9838	1.02425	1.38562	0.406239	4.13442	0.0861569	1.33076
ACSS2	Acetyl-coenzyme A synthetase	Q9NR19	FYTAPTAIR	406	NO	1	1.07898	1.03901	1.07059	1.18714	1.34253	8.22361	0.9518	1.03525	1.35339	0.406502	2.70785	0.141313	0.771833
BAX	Apoptosis regulator BAX	Q07812	TGALLLQGFIQDR	22	NO	1	0.957201	1.00674	1.06988	0.974237	1.44607	37.5215	0.9568	1.00157	1.44766	0.406524	2.48259	0.00630097	0.0201289
GPD1L	Glycerol-3-phosphate dehydrogenase 1-like protein	Q8N335	ALGITLIK	115	NO	1	0.933592	1.0245	1.03325	1.08655	1.38605	14.6704	0.9519	0.997769	1.38689	0.40663	3.34491	0.14414	1.27297
HSP90AA1	Heat shock protein HSP 90-alpha	P07900	KTKFENLCK	565	NO	1	0.979982	0.96653	1.02303	1.07298	1.34447	17.4314	0.9824	0.992359	1.35164	0.407314	2.3486	0.0775222	0.301064
RPS6KA3	Ribosomal protein S6 kinase alpha-3	P51812	LTAALVLR	668	NO	1	1.00474	0.984939	0.964005	1.05224	1.33887	16.9976	0.9898	0.988422	1.34113	0.408012	4.25231	0.0547492	0.445166
ACACA	Acetyl-CoA carboxylase 1	Q13085	IYVSANSGAR	1714	NO	1	1.02191	1.03259	1.10486	1.20426	1.32547	4.3659	0.9912	1.00417	1.35376	0.408815	3.62736	0.187856	1.71065
UBR4	E3 ubiquitin-protein ligase UBR4	Q5T4S7	ALATNPALR	3889	NO	1	1.0318	0.994325	1.13512	1.19981	1.33863	6.72139	0.9591	0.999187	1.40324	0.408999	2.92144	0.198395	1.51871
GCN1	Stalled ribosome sensor GCN1	Q92616	IIIEDLLEATR	2151	NO	1	0.971134	1.0581	1.05307	1.04306	1.28761	17.0714	0.9156	1.02051	1.28769	0.409723	3.48768	0.0865591	0.494762
WASHC2A	WASH complex subunit 2A	Q641Q2	EVDLIPK	126	NO	1	1.12647	1.15466	1.18481	1.29616	1.29884	0.219811	0.9641	0.999369	1.36451	0.409732	2.03281	0.351449	1.36764
CPSF2	Cleavage and polyadenylation specificity factor subunit 2	Q9P2I0	CISTTESIEIK	522	NO	1	0.959942	1.05173	0.993806	1.12868	1.33554	12.0101	0.9553	1.0013	1.33672	0.410203	2.44761	0.308177	1.42982
SYNE2	Nesprin-2	Q8WXH0	SSVLTQVNQLK	5259	NO	1	1.09375	1.00312	1.10804	1.12282	1.41355	14.4698	0.9133	1.05122	1.41378	0.41051	2.70385	0.187886	0.956101
OGA	Protein O-GlcNAcase	O60502	LFLGPYK	291	NO	1	0.980389	0.983729	1.05261	0.984214	1.29552	40.726	0.952	1.00019	1.29615	0.411035	3.66252	0.0862555	0.402935
CLIP1	CAP-Gly domain-containing linker protein 1	P30622	LLDLDALRK	773	NO	1	0.882214	0.91785	1.34434	1.27766	1.43412	0.432598	0.9307	0.933032	1.35637	0.411138	2.37835	0.376419	1.54347
ACACA	Acetyl-CoA carboxylase 1	Q13085	IHNANPELTDGQIQAMLR	2232	NO	1	1.01388	1.07151	1.08268	1.12383	1.37838	13.7578	0.947	1.04199	1.37865	0.411616	2.81022	0.22406	2.16349
PRKDC	DNA-dependent protein kinase catalytic subunit	P78527	DQNILLGTTYR	3325	NO	1	0.973538	0.992691	0.950987	1.07619	1.28306	11.9754	0.9811	0.979305	1.28309	0.411638	2.4216	0.130051	0.503135
ERCC2	General transcription and DNA repair factor IIH helicase subunit XPD	P18074	CQGNLETLQK	259	NO	1	1.0253	1.10734	1.11226	1.20872	1.45578	8.69402	0.9312	1.02487	1.4965	0.411962	2.32599	0.262652	1.27408
GCN1	Stalled ribosome sensor GCN1	Q92616	ALCDPLEEVR	2013	NO	1	1.06552	1.00148	0.978219	1.19299	1.25819	7.56079	0.9369	1.01128	1.25821	0.412747	3.85181	0.238401	1.5551
EIF3E	Eukaryotic translation initiation factor 3 subunit E	P60228	NLYSDDIPHALR	60	NO	1	0.972431	1.00223	1.02065	1.10972	1.33233	19.0515	0.9909	0.994406	1.3777	0.413678	4.99106	0.152691	2.01568
P4HB	Protein disulfide-isomerase	P07237	TVIDYNGER	453	NO	1	0.970596	0.967138	1.06374	1.24567	1.25537	1.46919	0.9923	0.979023	1.25297	0.414458	4.09894	0.350576	4.02149
PPP2R5B	Serine/threonine-protein phosphatase 2A 56 kDa regulatory subunit beta isoform	Q15173	IQEPLFK	354	NO	1	1.00056	0.956275	0.945757	1.0305	1.31189	18.9725	0.9732	0.975668	1.31647	0.415335	3.06687	0.119844	0.737462
HUWE1	E3 ubiquitin-protein ligase HUWE1	Q7Z6Z7	TDATTAIIK	675	NO	1	1.05271	1.02577	1.09924	1.16289	1.33175	9.93516	0.9569	1.01982	1.37543	0.4164	3.69991	0.160502	1.52637
SAR1B	GTP-binding protein SAR1b	Q9Y6B6	IDRPEAISEER	136	NO	1	1.04266	1.04189	1.35396	1.25049	1.35328	0.186063	0.9408	1.02122	1.31933	0.416495	2.22795	0.202548	0.867948
CSE1L	Exportin-2	P55060	AADEEAFEDNSEEYIRR	356	NO	1	0.960505	1.02676	1.08706	1.03317	1.3419	18.5645	0.91	1.0184	1.34195	0.416798	5.92631	0.0537318	0.492581
ATP2A3	Sarcoplasmic/endoplasmic reticulum calcium ATPase 3	Q93084	CLALATR	561	NO	1	0.983857	0.893199	0.940512	1.07963	1.34388	12.3275	0.9471	0.954305	1.34399	0.419313	4.31389	0.126258	1.00231
PRKDC	DNA-dependent protein kinase catalytic subunit	P78527	SIGEYDVLR	2932	NO	1	1.04047	1.00287	1.05221	1.07652	1.36504	17.2192	0.9781	1.02385	1.3664	0.419872	3.8208	0.0724204	0.504555
CPTP	Ceramide-1-phosphate transfer protein	Q5TA50	SLQAMVAHELSNR	78	NO	1	0.997501	1.20941	1.28387	1.34835	1.42243	0.13688	0.9593	0.979909	1.39614	0.419354	2.29522	0.420591	2.31604
EZR	Ezrin	P15311	DNAMLEYLK	185	NO	1	0.987703	1.18127	1.22182	1.31812	1.265	0.0668303	0.9509	0.98981	1.26979	0.465512	2.17439	0.421673	2.49493
HSP90AA1	Heat shock protein HSP 90-alpha	P07900	ELISNSSDALDK	47	NO	1	0.907838	0.987112	1.03029	1.06632	1.35778	20.6163	0.9344	0.979394	1.38393	0.421825	2.38345	0.0593376	0.195049
YWHAE	14-3-3 protein epsilon	P62258	EAAENSLVAYK	143	NO	1	0.990545	1.15644	1.06655	1.25645	1.4632	13.4626	0.9003	1.03008	1.55801	0.422135	2.45839	0.169744	0.674665
C1D	Nuclear nucleic acid-binding protein C1D	Q13901	EHPVKQELER	80	NO	1	1.00186	1.02952	1.08368	1.02594	1.26565	19.6819	0.911	1.02772	1.26561	0.423021	3.20404	0.130949	0.703355
RARS2	Probable arginine--tRNA ligase	Q5T160	STIIGNFIANLK	147	NO	1	1.02711	1.06302	1.01524	1.08603	1.27326	13.3414	0.9576	1.02628	1.27328	0.42347	3.61271	0.210023	1.15818
ACACA	Acetyl-CoA carboxylase 1	Q13085	LGGIPVGVVAVETR	1978	NO	1	1.04099	1.08322	1.07462	1.12021	1.41153	13.9638	0.9606	1.04967	1.41158	0.423696	3.86084	0.152814	1.22663
NFU1	NFU1 iron-sulfur cluster scaffold homolog	Q9UMS0	FIPGKPVLETR	74	NO	1	1.02035	1.07803	1.1083	1.26759	1.47563	7.65162	0.9819	1.0158	1.53201	0.423783	2.12605	0.213103	0.972063
KDM1A	Lysine-specific histone demethylase 1A	O60341	IKELHQQYK	455	NO	1	1.03637	1.05257	1.13235	1.15383	1.45717	14.9028	0.9328	1.05537	1.45836	0.423985	2.20339	0.117546	0.565708
PDCD6	Programmed cell death protein 6	O75340	QALSGFGYR	117	NO	1	1.02936	1.00617	0.972925	1.15157	1.47724	13.0572	0.9912	1.0021	1.47851	0.424275	2.58233	0.214412	1.27118
MMAB	Corrinoid adenosyltransferase MMAB	Q96EY8	LSDYLFTLAR	216	NO	1	1.02327	1.08682	1.04721	1.06908	1.44997	14.4414	0.9708	1.03936	1.44998	0.424517	2.47708	0.0901085	0.347541
GCN1	Stalled ribosome sensor GCN1	Q92616	HHIETGGGQLPAK	2538	NO	1	0.921946	0.955766	1.00949	1.09389	1.32535	19.4591	0.9623	0.963581	1.38972	0.424541	3.21762	0.234569	1.5578
ATP6V1A	V-type proton ATPase catalytic subunit A	P38606	QVRPVTEKLPANHPLLTGQR	213	NO	1	0.960646	0.992909	0.923477	0.961208	1.30826	40.1095	0.9629	0.967634	1.30958	0.425045	2.32921	0.0864338	0.317319
P4HB	Protein disulfide-isomerase	P07237	TLDGFKK	462	NO	1	1.15556	1.08192	1.15762	1.33076	1.44164	3.46566	0.9087	1.06683	1.45615	0.42574	2.4143	0.401107	2.37559
USP9X	Probable ubiquitin carboxyl-terminal hydrolase FAF-X	Q93008	LAQQISDEASR	1221	NO	1	0.976501	1.07732	1.10743	1.13568	1.29752	5.73499	0.9032	0.987397	1.34767	0.426339	2.45249	0.115922	0.894417
PLEC	Plectin	Q15149	MVEGYQGLR	308	NO	1	0.965765	0.955324	1.05502	1.20436	1.31907	5.18437	0.9833	0.972468	1.34255	0.426383	3.40914	0.0956517	0.267919
HK2	Hexokinase-2	P52789	NVELVEGEEGR	692	NO	1	1.13542	1.05578	1.08088	1.12964	1.41031	13.465	0.9081	1.06797	1.41028	0.426811	4.18509	0.19665	1.68165
INTS5	Integrator complex subunit 5	Q6P9B9	LVPFLDALK	470	NO	1	0.929041	0.989898	0.952888	1.00516	1.26126	18.6127	0.9551	0.967964	1.26281	0.427103	3.10123	0.104661	0.560112
HK2	Hexokinase-2	P52789	STIGVDGSVYK	408	NO	1	1.09007	1.03608	1.00213	1.16273	1.32122	10.6595	0.9306	1.03204	1.32155	0.428202	3.73469	0.208589	1.30243
ITCH	E3 ubiquitin-protein ligase Itchy homolog	Q96J02	SALDNGPQIAYVR	514	NO	1	1.01056	1.0325	0.980938	1.12657	1.2937	11.0872	0.9803	1.00596	1.29395	0.42918	5.07268	0.163791	1.79812
EXOSC1	Exosome complex component CSL4	Q9Y3B2	HGYIFSSLAGCLMK	30	NO	1	0.900692	1.09103	1.23137	1.3345	1.29998	0.202455	0.9425	0.950972	1.31224	0.476993	2.75824	0.43079	2.8943
GCN1	Stalled ribosome sensor GCN1	Q92616	QGEEVFQSLSK	2624	NO	1	1.08266	1.07067	1.0212	1.12062	1.48867	14.8849	0.9714	1.04358	1.48888	0.430892	2.19426	0.150693	0.617939
RRM1	Ribonucleoside-diphosphate reductase large subunit	P23921	HPDYAILAAR	71	NO	1	0.988245	1.12022	1.4269	1.37737	1.27992	0.116945	0.9376	0.994213	1.36136	0.346264	1.90982	0.432132	2.4411
MID1IP1	Mid1-interacting protein 1	Q9NPA3	GLHTVLSK	153	NO	1	0.908684	1.11663	1.12072	1.48685	1.50711	2.10341	0.933	1.00324	1.52016	0.431533	1.7891	0.433583	2.02256
SET	Protein SET	Q01105	LRQPFFQK	76	NO	1	1.10174	1.09937	1.07863	1.06513	1.46018	17.752	0.9486	1.06826	1.46011	0.434199	2.70122	0.0711641	0.388278
CLTC	Clathrin heavy chain 1	Q00610	QLPLVKPYLR	1444	NO	1	1.10285	1.02435	1.08114	1.18283	1.45524	12.5236	0.9504	1.05209	1.45575	0.435083	3.31244	0.207207	1.60969
QRSL1	Glutamyl-tRNA(Gln) amidotransferase subunit A	Q9H0R6	QGQITPTELCQK	15	NO	1	1.13514	1.01913	1.08567	1.15629	1.49948	14.1485	0.9303	1.05988	1.49972	0.435231	2.24367	0.205909	1.15447
MCM5	DNA replication licensing factor MCM5	P33992	VTIMGIYSIK	263	NO	1	0.975104	1.17893	1.23229	1.35707	1.32626	0.122496	0.9449	0.976734	1.33354	0.254035	1.09838	0.435389	3.09928
PKM	Pyruvate kinase PKM	P14618	CCSGAIIVLTK	423	NO	1	1.11622	1.06096	1.05764	1.22758	1.48449	11.727	0.9571	1.05854	1.48589	0.43568	2.90051	0.217197	2.05778
HSPA9	Stress-70 protein	P38646	DAGQISGLNVLR	207	NO	1	1.03403	1.07469	1.02533	1.12757	1.37505	13.3416	0.9702	1.03345	1.37538	0.435871	3.76135	0.0686263	0.386244
PDS5A	Sister chromatid cohesion protein PDS5 homolog A	Q29RF7	SQLELLISPTCSCK	571	NO	1	1.01985	1.00462	1.01764	0.985959	1.4256	61.9455	0.9948	1.00558	1.47596	0.435913	2.35874	0.0895541	0.294891
PRKDC	DNA-dependent protein kinase catalytic subunit	P78527	GIFTSEIGTK	2941	NO	1	1.00377	0.9963	1.00397	1.03949	1.28506	15.1446	0.9994	1.00101	1.28512	0.436103	4.36119	0.12266	1.16634
STK24	Serine/threonine-protein kinase 24	Q9Y6E0	NNPPTLEGNYSKPLK	246	NO	1	1.05422	1.19526	1.27097	1.31812	1.34965	0.0817604	0.9923	0.99534	1.3411	0.436604	2.27023	0.299577	1.5299
AGR2	Anterior gradient protein 2 homolog	O95994	LYAYEPADTALLLDNMKK	149	NO	1	0.9463	1.0355	1.30869	1.23839	1.34405	0.1487	0.951	0.973143	1.29716	0.436874	2.52125	0.177393	0.816101
TAX1BP3	Tax1-binding protein 3	O14907	IMQVNGWDMTMVTHDQAR	77	NO	1	0.906565	1.2295	1.26656	1.25836	1.36311	0.0699851	0.9285	0.953264	1.29602	0.0559729	0.0481342	0.438776	3.13794
MDN1	Midasin	Q9NU22	TIIYLDR	2634	NO	1	1.07649	1.03721	1.13697	1.1941	1.26441	1.5886	0.9346	1.01181	1.28629	0.439189	2.70132	0.196724	0.966684
MCCC1	Methylcrotonoyl-CoA carboxylase subunit alpha	Q96RQ3	SEQEFQEQLESARR	220	NO	1	0.960406	0.958012	1.0084	0.999479	1.26658	28.0073	0.9698	0.981652	1.27631	0.440015	3.31465	0.079121	0.524665
LARS1	Leucine--tRNA ligase	Q9P2J5	VFASELNAGIIK	796	NO	1	0.931701	1.03054	0.953894	1.12393	1.26058	9.83186	0.9213	0.979011	1.26073	0.441659	2.91281	0.153071	0.951842
KNTC1	Kinetochore-associated protein 1	P50748	IQNSSGTDYPDIHAAAK	1786	NO	1	1.08563	0.970708	1.08718	1.04792	1.40096	73.6568	0.9106	1.03829	1.46295	0.442397	2.6778	0.0730834	0.302737
UBE2L3	Ubiquitin-conjugating enzyme E2 L3	P68036	IYHPNIDEK	74	NO	1	0.933056	0.927917	0.941148	0.996639	1.29458	18.3223	0.966	0.950524	1.29639	0.442932	4.23523	0.101451	0.615021
UBR1	E3 ubiquitin-protein ligase UBR1	Q8IWV7	TVVQSCGHSLETK	584	NO	1	0.973346	0.956093	1.06418	1.10253	1.29244	21.3701	0.9464	0.981213	1.38345	0.443027	2.21438	0.200236	0.901062
G6PD	Glucose-6-phosphate 1-dehydrogenase	P11413	KPGMFFNPEESELDLTYGNR	408	NO	1	0.971802	1.05782	1.04228	1.05471	1.40781	14.9317	0.9637	1.01797	1.40782	0.445229	5.24173	0.0137138	0.0879616
RIF1	Telomere-associated protein RIF1	Q5UIP0	EKPGSEVLTLLLK	520	NO	1	0.965533	0.886419	1.00797	1.03631	1.30485	16.7794	0.9093	0.964702	1.30828	0.446669	2.55719	0.111193	0.457948
IARS1	Isoleucine--tRNA ligase	P41252	VENMVDQLLR	419	NO	1	1.06712	1.00743	1.00214	1.09735	1.39112	17.9506	0.9727	1.01922	1.39811	0.447412	2.89971	0.159235	1.312
MCCC2	Methylcrotonoyl-CoA carboxylase beta chain	Q9HCC0	ALVNQLHERVEHIK	51	NO	1	1.1067	1.23883	1.29703	1.36621	1.4952	0.846214	0.9815	0.99562	1.5958	0.447682	2.08249	0.339014	1.5781
SRPRA	Signal recognition particle receptor subunit alpha	P08240	GTLGGMFGMLK	315	NO	1	0.869313	1.11428	1.42405	1.37303	1.38004	0.112396	0.9625	0.934639	1.39241	0.447908	2.02006	0.278114	0.980885
API5	Apoptosis inhibitor 5	Q9BZZ5	QAVPLFSK	244	NO	1	1.07329	1.10161	1.01438	1.19254	1.37935	10.7448	0.9307	1.04727	1.37937	0.448323	2.62888	0.128348	0.614418
P4HB	Protein disulfide-isomerase	P07237	AAGKLKAEGSEIR	66	NO	1	1.10051	1.06895	1.1683	1.26976	1.34468	1.42286	0.9517	1.01177	1.38342	0.448417	3.57677	0.347349	2.72286
PPP2R1A	Serine/threonine-protein phosphatase 2A 65 kDa regulatory subunit A alpha isoform	P30153	NLCSDDTPMVR	172	NO	1	1.07252	1.05165	1.01513	0.985804	1.33084	54.1879	0.9368	1.02496	1.35773	0.448845	2.57642	0.0368147	0.108568
OTUD6B	Deubiquitinase OTUD6B	Q8N6M0	HAYGLGEHYNSVTR	270	NO	1	1.04666	1.29043	1.39952	1.43735	1.39236	0.0506669	0.9942	0.999726	1.41317	0.449266	2.66123	0.411721	2.55857
GATB	Glutamyl-tRNA(Gln) amidotransferase subunit B	O75879	LPIAVNGSLIYGVCAGKK	157	NO	1	1.04246	1.04454	1.11842	1.15351	1.42765	12.4865	0.9261	1.03065	1.45246	0.450519	4.53684	0.20244	2.40206
PRKDC	DNA-dependent protein kinase catalytic subunit	P78527	SQGCSEQVLTVLK	3290	NO	1	1.03307	1.00282	1.02997	1.08878	1.36105	16.5685	0.9905	1.01637	1.36402	0.451025	4.6349	0.132857	1.32717
EXOC7	Exocyst complex component 7	Q9UPT5	LENSIIPVHK	56	NO	1	0.93154	1.29179	1.3494	1.5021	1.49608	0.0799051	0.9421	0.965482	1.44931	0.451829	2.30069	0.394348	1.28311
GFM2	Ribosome-releasing factor 2	Q969S9	DYLSPVLADLAQRR	699	NO	1	1.01633	1.09803	1.12264	1.05549	1.48366	51.2549	0.9326	1.0585	1.48366	0.451985	2.16933	0.0653158	0.190669
MACROH2A1	Core histone macro-H2A	O75367	AGVIFPVGR	19	NO	1	0.991308	0.978608	1.02749	1.04726	1.3683	17.2858	0.9884	0.999331	1.36912	0.452811	5.01187	0.122749	1.43701
RPS6KA3	Ribosomal protein S6 kinase alpha-3	P51812	TVEYLHAQGVVHR	526	NO	1	0.929371	0.955985	0.965025	1.02774	1.25566	16.3378	0.9642	0.962529	1.25843	0.453349	2.25576	0.0965261	0.289044
SCYL1	N-terminal kinase-like protein	Q96KG9	IIPVVVK	350	NO	1	0.988425	1.09527	1.0783	1.1811	1.36075	12.8013	0.9376	1.0092	1.44484	0.454661	2.26897	0.223114	1.06008
HDHD3	Haloacid dehalogenase-like hydrolase domain-containing protein 3	Q9BSH5	LLTWDVKDTLLR	9	NO	1	1.08055	1.0587	1.06544	1.17361	1.4922	13.2026	0.9767	1.05117	1.49263	0.459323	2.44836	0.238667	2.21131
H2AC4	Histone H2A type 1-B/E	P04908	HLQLAIRNDEELNKLLGR	83	NO	1	0.8733	1.1864	1.36152	1.33748	1.52332	0.0965529	0.9036	0.936598	1.40752	0.462426	2.45352	0.32701	2.28752
SMAD2	Mothers against decapentaplegic homolog 2	Q15796	DEVCVNPYHYQR	158	NO	1	0.97636	0.978243	1.13961	1.3493	1.27109	1.02268	0.974	0.984863	1.3102	0.442549	3.10102	0.462899	3.4052
DDX6	Probable ATP-dependent RNA helicase DDX6	P26196	IKTSDVTSTK	85	NO	1	1.07915	1.05332	1.03755	1.10549	1.44784	24.9374	0.9756	1.04236	1.47525	0.463723	3.46581	0.12561	0.758352
PRPF8	Pre-mRNA-processing-splicing factor 8	Q6P2Q9	VWAEYALK	1385	NO	1	1.1673	1.28038	1.44396	1.50605	1.44021	0.0398586	0.9758	1.00455	1.48504	0.464599	2.19254	0.356577	1.14692
SAR1A	GTP-binding protein SAR1a	Q9NR31	QGYGEGFR	184	NO	1	1.04746	1.15565	1.16711	1.32059	1.4971	3.92072	0.962	1.00294	1.58523	0.466566	3.6935	0.300211	2.61322
STARD10	START domain-containing protein 10	Q9Y365	WDSNVIETFDIAR	95	NO	1	0.821841	0.892235	0.901418	0.892447	1.37302	25.3067	0.9195	0.901511	1.37303	0.466769	2.77156	-0.0661698	0.220323
HK2	Hexokinase-2	P52789	MLPTYVCATPDGTEKGDFLALDLGGTNFR	511	NO	1	1.04536	1.0815	1.04279	0.946568	1.37576	46.2332	0.9063	1.02321	1.38307	0.467963	3.16191	-0.260795	0.550052
CTPS2	CTP synthase 2	Q9NRF8	SSTPIEMAVK	218	NO	1	0.944975	1.00705	1.15691	1.22753	1.53306	17.6443	0.9592	0.973624	1.71624	0.468775	2.18542	0.289056	1.21217
GATB	Glutamyl-tRNA(Gln) amidotransferase subunit B	O75879	ETLPELPSVTR	371	NO	1	1.05813	1.03411	1.01192	1.13075	1.37772	11.946	0.9806	1.02604	1.37773	0.468988	4.99584	0.131428	1.92206
ACACA	Acetyl-CoA carboxylase 1	Q13085	TVELSIPADPANLDSEAK	1992	NO	1	1.09467	1.02022	1.02454	1.07786	1.38428	16.4469	0.9505	1.03474	1.38452	0.469579	3.86339	0.0922265	0.471853
HDHD3	Haloacid dehalogenase-like hydrolase domain-containing protein 3	Q9BSH5	IFQEALR	172	NO	1	1.01919	1.05155	1.02475	1.13223	1.4791	13.7527	0.9919	1.02386	1.47942	0.470371	2.96882	0.136741	0.650337
P4HB	Protein disulfide-isomerase	P07237	NFEDVAFDEKK	376	NO	1	1.0269	0.989734	1.13982	1.41085	1.38388	1.20357	0.994	1.00552	1.39745	0.47111	3.77389	0.401058	3.74777
ASS1	Argininosuccinate synthase	P00966	FELSCYSLAPQIK	128	NO	1	0.989747	0.954883	0.916433	0.998615	1.2842	20.8888	0.9502	0.965205	1.28747	0.47204	2.50152	0.0773802	0.415767
RELCH	RAB11-binding protein RELCH	Q9P260	LSEENIDSSAGNGVLTK	888	NO	1	1.02616	1.0063	0.981698	1.14594	1.34452	11.1357	0.9897	1.00348	1.34488	0.472075	3.50961	0.127678	0.923223
CLTC	Clathrin heavy chain 1	Q00610	AYEFAER	1095	NO	1	0.986964	1.13859	1.03736	1.06347	1.54771	19.9525	0.9371	1.04064	1.54811	0.472736	2.31393	0.0887937	0.261977
PAXBP1	PAX3- and PAX7-binding protein 1	Q9Y5B6	LTVIAENMWDPFSTTQTSR	688	NO	1	1.1541	1.08408	1.47848	1.51196	1.48325	0.352958	0.954	1.07617	1.4973	0.327151	0.764481	0.474531	2.21948
MCCC1	Methylcrotonoyl-CoA carboxylase subunit alpha	Q96RQ3	IGYPVMIK	198	NO	1	0.920777	1.02562	0.900761	1.03754	1.33572	16.5696	0.9107	0.961858	1.33846	0.475544	2.08943	0.241188	0.890052
PDCD6	Programmed cell death protein 6	O75340	LSDQFHDILIR	126	NO	1	0.950162	0.931362	1.00312	1.10402	1.37933	22.6979	0.9772	0.965274	1.4615	0.476166	3.56351	0.140768	0.815287
SYNE2	Nesprin-2	Q8WXH0	GSMFDELMAR	777	NO	1	0.895138	1.37092	1.31723	1.42741	1.50778	0.0577836	0.9219	0.947298	1.41761	0.288345	0.587267	0.476539	2.7498
ACACA	Acetyl-CoA carboxylase 1	Q13085	LGTPELSTAERK	2151	NO	1	0.973622	1.00753	1.04356	1.09405	1.36779	14.1785	0.9768	1.00612	1.36838	0.476698	6.63357	0.125814	2.40824
PPP2R5C	Serine/threonine-protein phosphatase 2A 56 kDa regulatory subunit gamma isoform	Q13362	FLESPDFQPNIAKK	144	NO	1	1.02139	1.05563	1.04089	1.00753	1.31177	20.6575	0.9697	1.02506	1.31176	0.477751	3.71074	0.113112	0.61544
SET	Protein SET	Q01105	LRQPFFQKR	76	NO	1	1.08614	1.05599	1.09115	1.10622	1.45002	14.3835	0.9592	1.05835	1.45005	0.478747	4.65216	0.090197	0.717147
GATB	Glutamyl-tRNA(Gln) amidotransferase subunit B	O75879	HYFYADLPAGYQITQQR	140	NO	1	0.980695	0.976993	1.06249	1.12185	1.4008	28.8521	0.9772	0.993762	1.52792	0.479587	4.1942	0.156708	1.38073
PRKDC	DNA-dependent protein kinase catalytic subunit	P78527	GLSSLLCNFTK	226	NO	1	1.05471	0.988134	1.01473	1.05586	1.4076	13.3103	0.9802	1.01439	1.4076	0.480148	4.12408	0.0637808	0.394131
MARS1	Methionine--tRNA ligase	P56192	HGNQYIQVNEPWKR	714	NO	1	1.04126	1.01649	1.03687	1.11593	1.41949	12.8325	0.9913	1.02366	1.41951	0.482205	2.00778	0.198751	0.925493
ARFIP2	Arfaptin-2	P53365	TMEDTLMTVK	217	NO	1	0.924685	1.08348	1.14726	1.24431	1.41964	6.22052	0.9411	0.967945	1.52495	0.483627	2.69087	0.186042	0.79964
NUP205	Nuclear pore complex protein Nup205	Q92621	LLDIEGLYSK	1979	NO	1	1.02183	0.984171	1.07412	1.07427	1.48566	19.8335	0.9743	1.01997	1.48949	0.484092	3.91237	0.0735878	0.442336
ATP2A3	Sarcoplasmic/endoplasmic reticulum calcium ATPase 3	Q93084	MNVFDTDLQALSR	452	NO	1	1.01011	1.02736	1.09585	1.22139	1.48975	16.9162	0.9917	1.00942	1.60389	0.485346	3.4926	0.175924	0.982133
PRKDC	DNA-dependent protein kinase catalytic subunit	P78527	QITQSALLAEAR	2951	NO	1	1.09633	0.960708	1.04704	1.11392	1.50974	18.6356	0.9478	1.02585	1.51774	0.485488	3.46218	0.160415	1.45926
TKFC	Triokinase/FMN cyclase	Q3LXA3	AVAQAGTVGTLLIVK	95	NO	1	1.07628	1.02506	1.04827	1.05315	1.4833	19.6727	0.9809	1.03723	1.48345	0.485562	3.20557	0.0695614	0.29746
CHD4	Chromodomain-helicase-DNA-binding protein 4	Q14839	GLRNDKDKPLPPLLAR	1391	NO	1	0.945407	1.52413	1.37955	1.433	1.55047	0.030353	0.9419	0.97266	1.47181	0.485847	2.33568	0.34528	1.44672
HSPH1	Heat shock protein 105 kDa	Q92598	AFNDPFIQK	74	NO	1	1.08071	1.16321	1.21341	1.33426	1.44596	1.93955	0.9891	0.999678	1.54253	0.486102	2.06056	0.26332	1.2086
HNRNPU	Heterogeneous nuclear ribonucleoprotein U	Q00839	APQCLGKFIEIAAR	559	NO	1	0.964502	0.887025	0.943262	1.20996	1.29639	7.62562	0.9499	0.948663	1.29633	0.487795	2.36071	0.271151	1.4173
PRKDC	DNA-dependent protein kinase catalytic subunit	P78527	NVDSNNKELSIAIR	351	NO	1	1.05099	1.01357	1.11873	1.11957	1.40799	14.5099	0.9252	1.0458	1.40829	0.488091	6.69782	0.128804	2.27802
SMAD2	Mothers against decapentaplegic homolog 2	Q15796	AIENCEYAFNLKK	145	NO	1	0.910986	0.933256	1.21329	1.3515	1.27269	0.761712	0.9585	0.948	1.31212	0.489803	2.00218	0.433129	1.70935
NUMA1	Nuclear mitotic apparatus protein 1	Q14980	QPEWLEEQQGR	948	NO	1	1.02167	1.13022	1.01185	1.34574	1.31454	3.39366	0.9073	1.04088	1.33041	0.32207	0.892652	0.490604	2.64339
RNF213	E3 ubiquitin-protein ligase RNF213	Q63HN8	KTEDECSFVSLR	2628	NO	1	1.05869	1.03776	1.03238	1.01037	1.40326	26.6862	0.9819	1.02776	1.40327	0.490895	2.23893	0.125233	0.424322
AHCYL1	S-adenosylhomocysteine hydrolase-like protein 1	O43865	VVLLAEGR	434	NO	1	1.0529	1.09358	1.07367	1.03119	1.36489	19.6463	0.939	1.05009	1.36482	0.491221	3.3105	0.0870933	0.327509
MON2	Protein MON2 homolog	Q7Z3U7	LFSPNIK	282	NO	1	0.976041	0.908733	1.01727	1.01987	1.35541	15.2768	0.9447	0.975507	1.35545	0.491504	2.72479	0.0661211	0.218438
NLRP2	NACHT	Q9NX02	LLYTTLR	830	NO	1	0.912626	0.929051	1.09575	1.11255	1.4256	25.7785	0.9115	0.956543	1.58191	0.492119	4.84953	0.0400544	0.195458
KIF5B	Kinesin-1 heavy chain	P33176	LHDPEGMGIIPR	99	NO	1	1.13542	0.994763	1.03365	1.16016	1.49597	14.1972	0.9286	1.0409	1.49734	0.494532	3.85646	0.141722	1.02395
THYN1	Thymocyte nuclear protein 1	Q9P016	FIPLAELK	172	NO	1	0.849279	1.12509	1.2809	1.40444	1.33546	0.103683	0.9166	0.924427	1.34102	0.43406	2.29205	0.494704	2.637
BAX	Apoptosis regulator BAX	Q07812	IGDELDSNMELQR	66	NO	1	1.00883	1.07007	1.13119	1.13852	1.30807	3.83348	0.9081	0.991967	1.34132	0.495571	2.65628	0.152668	0.616025
CLTC	Clathrin heavy chain 1	Q00610	IVLDNSVFSEHR	1011	NO	1	0.903653	0.949867	1.08238	1.10218	1.40888	23.6338	0.9129	0.960414	1.5346	0.496593	3.2337	0.0991777	0.341022
HSP90AB1	Heat shock protein HSP 90-beta	P08238	EDQTEYLEERR	187	NO	1	0.951832	0.849173	0.88304	1.03863	1.4226	14.3706	0.9359	0.921014	1.42348	0.497555	2.841	-0.0667542	0.128629
PGRMC2	Membrane-associated progesterone receptor component 2	O15173	ILLAVNGK	119	NO	1	1.30921	1.38536	1.44496	1.50307	1.35251	0.00130903	0.9193	0.997347	1.43415	0.396993	1.37209	0.497568	2.2579
HINT2	Adenosine 5'-monophosphoramidase HINT2	Q9BX68	LVINDGK	133	NO	1	1.11286	1.27696	1.3119	1.42457	1.39043	0.0410928	0.9744	0.997525	1.4068	0.278596	0.772367	0.497807	2.17892
P4HB	Protein disulfide-isomerase	P07237	MDSTANEVEAVK	425	NO	1	0.999799	1.07574	1.2406	1.40636	1.59554	4.61667	0.9954	0.985634	1.72078	0.556174	3.56316	0.497947	4.02633
PPP4R3A	Serine/threonine-protein phosphatase 4 regulatory subunit 3A	Q6IN85	FKEVIPISDPELK	246	NO	1	0.920541	1.03145	1.03699	1.07445	1.38996	15.862	0.9346	0.997178	1.39136	0.498241	3.0796	0.21081	1.16548
PSMD5	26S proteasome non-ATPase regulatory subunit 5	Q16401	LGPLFSLLNENHR	46	NO	1	0.958928	1.00575	1.03441	1.05193	1.33862	21.0671	0.9696	0.999456	1.34804	0.49889	4.74678	0.0496623	0.24969
EPRS1	Bifunctional glutamate/proline--tRNA ligase	P07814	AYVDDTPAEQMK	289	NO	1	1.08202	1.03509	0.974482	1.00875	1.35652	37.0299	0.9337	1.01989	1.36032	0.499785	2.996	0.0292661	0.13475
PRKDC	DNA-dependent protein kinase catalytic subunit	P78527	NILAFRDQNILLGTTYR	3319	NO	1	0.963579	1.02819	0.995065	1.02318	1.32617	15.3625	0.9767	0.996685	1.32617	0.499935	4.04935	0.0686541	0.533535
MCCC1	Methylcrotonoyl-CoA carboxylase subunit alpha	Q96RQ3	SEQEFQEQLESAR	220	NO	1	1.0889	0.987399	0.956175	0.981981	1.4082	51.5025	0.9302	1.00289	1.41592	0.500958	4.27092	0.0475093	0.275709
TWF1	Twinfilin-1	Q12792	MLYAATR	99	NO	1	1.21068	1.18729	1.17994	1.23224	1.25939	0.011316	0.9458	0.999742	1.37446	0.501836	2.42554	0.458093	2.15812
PRKDC	DNA-dependent protein kinase catalytic subunit	P78527	NLSSNEAISLEEIR	839	NO	1	1.01082	1.04285	1.00783	1.05405	1.41942	16.5347	0.992	1.01539	1.41955	0.503663	3.86564	0.132734	1.35995
VPS35	Vacuolar protein sorting-associated protein 35	Q96QK1	NYLLQCTR	151	NO	1	1.10262	1.12377	1.10288	1.23197	1.49129	8.67972	0.9091	1.07084	1.47731	0.504294	4.26125	0.231325	2.00859
PRPF8	Pre-mRNA-processing-splicing factor 8	Q6P2Q9	QNPFWWTHQR	1450	NO	1	1.15688	0.988764	1.11964	1.55027	1.43126	1.61319	0.9075	1.04839	1.49096	0.231307	0.505524	0.504539	3.26139
CSE1L	Exportin-2	P55060	AACDLVR	385	NO	1	1.05136	0.97644	1.00606	1.08854	1.3839	12.7813	0.9746	1.00847	1.38391	0.505005	2.98705	0.108144	0.683497
CPSF3	Cleavage and polyadenylation specificity factor subunit 3	Q9UKF6	GLIPVFALGR	236	NO	1	1.03133	1.10425	1.00852	1.07527	1.49538	18.932	0.9622	1.03604	1.49633	0.505126	3.80204	0.0978663	0.464617
G6PD	Glucose-6-phosphate 1-dehydrogenase	P11413	NVKLPDAYER	430	NO	1	1.10079	1.11267	1.0898	1.34953	1.52196	7.36494	0.9611	1.06942	1.53142	0.508064	3.22192	0.330654	1.90779
PPP2R1A	Serine/threonine-protein phosphatase 2A 65 kDa regulatory subunit A alpha isoform	P30153	EFCENLSADCR	308	NO	1	0.962734	1.0537	1.1024	1.08909	1.42738	34.6781	0.9213	1.02667	1.51612	0.509612	2.70574	0.17351	0.585558
PKM	Pyruvate kinase PKM	P14618	ITLDNAYMEK	142	NO	1	0.946185	1.07402	1.17209	1.27373	1.42705	4.48897	0.9668	0.972051	1.52115	0.509999	4.75988	0.295438	3.43233
MYO1C	Unconventional myosin-Ic	O00159	IICDLVEEK	478	NO	1	0.99649	0.993643	1.15256	1.22404	1.32405	1.90228	0.9697	0.985782	1.33372	0.512229	3.27981	0.316615	2.55871
ACACA	Acetyl-CoA carboxylase 1	Q13085	GGSWVVIDSSINPR	2090	NO	1	1.06393	1.15017	1.10621	1.22291	1.58802	12.8457	0.9443	1.08007	1.58839	0.513052	2.80639	0.214857	1.88372
PRKDC	DNA-dependent protein kinase catalytic subunit	P78527	CLMDQATDPNILGR	4106	NO	1	1.01515	1.08936	1.06013	1.22644	1.64185	12.9105	0.983	1.0411	1.64275	0.513241	2.07127	0.343326	1.98222
EPRS1	Bifunctional glutamate/proline--tRNA ligase	P07814	AYVDDTPAEQMKAER	289	NO	1	1.04493	1.0839	1.12499	1.18023	1.40738	4.92723	0.9068	1.01034	1.42702	0.514039	3.47946	0.181534	1.37652
KIF5B	Kinesin-1 heavy chain	P33176	ADLAECNIK	2	NO	1	0.963684	0.977109	1.00624	0.957321	1.39682	63.0148	0.9872	0.980869	1.42421	0.514382	3.49497	0.0538817	0.238213
HK2	Hexokinase-2	P52789	LSDETLLEISKR	31	NO	1	1.03366	1.04455	1.08489	1.07771	1.44721	14.9748	0.9733	1.04076	1.44721	0.514407	3.53709	0.0896655	0.416352
CLTC	Clathrin heavy chain 1	Q00610	DPHLACVAYER	913	NO	1	0.92392	0.995438	0.968823	1.06101	1.31487	14.2352	0.9627	0.97202	1.31591	0.515383	3.41662	0.0989553	0.476684
USP28	Ubiquitin carboxyl-terminal hydrolase 28	Q96RU2	FEFNQSLGQPEK	370	NO	1	0.983495	1.07284	1.08237	1.14713	1.41943	21.6782	0.9485	1.02555	1.49203	0.515801	2.48251	0.083225	0.271755
KIF5B	Kinesin-1 heavy chain	P33176	LYLVDLAGSEK	227	NO	1	1.04849	1.02785	1.0368	1.11458	1.46938	14.1121	0.9918	1.02828	1.46952	0.515949	4.12923	0.125781	0.813072
CSE1L	Exportin-2	P55060	HKDAAIYLVTSLASK	426	NO	1	0.895777	0.987711	0.96306	0.937569	1.34447	33.2982	0.9474	0.956817	1.34452	0.517082	2.54213	0.0725768	0.224976
TRMT10C	tRNA methyltransferase 10 homolog C	Q7L0Y3	WDKLLLTSTEK	266	NO	1	0.982407	1.24646	1.43332	1.326	1.42408	0.0853427	0.9643	0.99108	1.39449	0.517708	2.36094	0.401996	2.10012
KIF5B	Kinesin-1 heavy chain	P33176	FQGEDTVVIASKPYAFDR	33	NO	1	0.950391	0.954124	1.10341	1.11392	1.42141	30.7712	0.9267	0.97985	1.58629	0.517772	4.95313	0.137289	0.923718
ACACA	Acetyl-CoA carboxylase 1	Q13085	LGTPELSTAER	2151	NO	1	1.05467	1.00973	1.07378	1.14344	1.48417	13.9552	0.9774	1.03451	1.48468	0.51852	6.10998	0.138724	1.83548
ASS1	Argininosuccinate synthase	P00966	NQAPPGLYTK	200	NO	1	0.904628	0.849876	0.842379	0.928294	1.41031	23.4123	0.9309	0.899236	1.41446	0.519228	3.12722	-0.0691229	0.318178
CLTC	Clathrin heavy chain 1	Q00610	LASTLVHLGEYQAAVDGAR	1227	NO	1	0.972788	1.02558	1.06137	0.997582	1.40616	21.8984	0.9663	1.01138	1.40614	0.519358	4.40878	0.117924	0.692281
PSMD5	26S proteasome non-ATPase regulatory subunit 5	Q16401	ALHSVLQAVPLNELR	24	NO	1	0.977418	0.987901	1.0085	1.06821	1.42269	16.2141	0.9962	0.993438	1.4239	0.519657	5.31347	0.0494647	0.522205
PSMD5	26S proteasome non-ATPase regulatory subunit 5	Q16401	LLQAMEPVHVAR	71	NO	1	0.951512	1.06031	1.09863	1.13105	1.48718	17.2256	0.9309	1.02652	1.49573	0.519716	5.57813	0.156485	2.05654
GSTM3	Glutathione S-transferase Mu 3	P21266	NKITQSNAILR	72	NO	1	1.1299	1.28238	1.30104	1.34972	1.61065	2.93673	0.9209	0.99711	1.76338	0.521629	2.15479	0.272509	1.0071
MCCC1	Methylcrotonoyl-CoA carboxylase subunit alpha	Q96RQ3	KSFNDDAMLIEK	237	NO	1	0.934787	1.04965	0.973696	1.08697	1.42152	15.0858	0.9554	0.989544	1.42299	0.522197	2.91977	0.0976887	0.512475
EPRS1	Bifunctional glutamate/proline--tRNA ligase	P07814	LNLNNTVLSK	426	NO	1	1.08601	1.09037	1.06068	1.18119	1.56802	14.6712	0.9756	1.05921	1.56955	0.522938	3.37978	0.114002	0.54504
RAI14	Ankycorbin	Q9P0K7	ISNLKEHLASK	751	NO	1	1.23361	1.36795	1.4876	1.53344	1.4177	0.0120584	0.9559	1.0009	1.48338	0.469055	1.73835	0.522949	2.23131
STARD10	START domain-containing protein 10	Q9Y365	SSQFLAPK	203	NO	1	0.838782	1.01901	1.06961	1.24415	1.44935	9.05632	0.922	0.935547	1.5612	0.524591	3.2563	0.161805	0.628816
ORC3	Origin recognition complex subunit 3	Q9UBD5	ENVVNFIDCLVR	553	NO	1	0.988432	1.1485	0.998956	1.04041	1.57549	18.2205	0.9326	1.03362	1.57547	0.525579	2.53895	0.0571895	0.213401
SPAG9	C-Jun-amino-terminal kinase-interacting protein 4	O60271	KPEPPVNLK	569	NO	1	0.816738	1.5944	1.50443	1.59087	1.57055	0.0345111	0.9627	0.908151	1.56555	0.301298	0.557832	0.526221	2.39229
EPRS1	Bifunctional glutamate/proline--tRNA ligase	P07814	KGSQFGQSCCLR	328	NO	1	0.972432	0.910187	0.97851	1.04964	1.36468	15.314	0.9662	0.965247	1.36587	0.527677	4.30762	0.0790111	0.536013
OSBPL8	Oxysterol-binding protein-related protein 8	Q9BZF1	SLIWTLLK	405	NO	1	0.983711	0.987621	0.951309	0.986154	1.33832	29.864	0.9879	0.980662	1.34189	0.527889	2.88746	0.128111	0.423928
UBR2	E3 ubiquitin-protein ligase UBR2	Q8IWV8	AMVLAAFVQR	1123	NO	1	0.922045	1.07587	1.19687	1.32734	1.62978	15.3772	0.9664	0.965659	1.87738	0.528011	2.55324	0.310452	2.30788
SBDS	Ribosome maturation protein SBDS	Q9Y3A5	RPYTVILIER	126	NO	1	0.996292	1.09392	1.11286	1.53401	1.74593	5.2055	0.9893	1.02374	1.77321	0.644066	1.99072	0.528047	2.11307
EEF1A1	Elongation factor 1-alpha 1	P68104	EKTHINIVVIGHVDSGK	4	NO	1	0.972931	1.35271	1.47739	1.53061	1.51908	0.0786323	0.9942	0.986301	1.50906	0.40514	1.64868	0.530029	2.5571
ADPRS	ADP-ribosylhydrolase ARH3	Q9NX46	GSYGNGGAMR	147	NO	1	0.953819	1.07149	1.02878	1.2845	1.53794	10.2087	0.9725	1.00532	1.57041	0.530084	2.49482	0.243176	0.888631
TTLL12	Tubulin--tyrosine ligase-like protein 12	Q14166	YIESPVLFLR	452	NO	1	0.945298	1.08982	1.0816	1.08097	1.47799	14.2978	0.919	1.02918	1.478	0.530608	3.53437	0.216002	1.47457
G6PD	Glucose-6-phosphate 1-dehydrogenase	P11413	VGFQYEGTYK	499	NO	1	1.08482	1.10629	1.15089	1.18071	1.57132	12.274	0.9402	1.08542	1.57124	0.530761	3.28447	0.204462	1.25691
EPRS1	Bifunctional glutamate/proline--tRNA ligase	P07814	GMTVEGLK	465	NO	1	1.05857	1.08912	0.983535	1.14692	1.38524	12.8098	0.9321	1.03282	1.38604	0.531047	2.11456	0.0921169	0.438008
EPRS1	Bifunctional glutamate/proline--tRNA ligase	P07814	GSQFGQSCCLR	329	NO	1	0.92809	0.948089	1.00636	1.09359	1.36959	12.6274	0.9666	0.970604	1.36988	0.533063	4.95781	0.144571	1.23697
PPP2R1A	Serine/threonine-protein phosphatase 2A 65 kDa regulatory subunit A alpha isoform	P30153	ELVSDANQHVK	332	NO	1	1.00343	0.966173	1.03726	1.15666	1.3313	14.401	0.987	0.990633	1.39306	0.533527	3.37955	0.226215	1.54006
RARS2	Probable arginine--tRNA ligase	Q5T160	FDEVLYK	505	NO	1	0.978877	1.03017	1.13342	1.1409	1.56715	15.3186	0.9414	1.03551	1.56823	0.533735	3.20474	0.220759	1.80447
CRNKL1	Crooked neck-like protein 1	Q9BZJ0	YTYMEEMLGNVAGAR	316	NO	1	0.729674	1.34087	1.4769	1.49387	1.38376	0.0723029	0.9071	0.864813	1.45153	0.448344	1.42188	0.534395	2.00438
VPS35	Vacuolar protein sorting-associated protein 35	Q96QK1	SEDPDQQYLILNTAR	500	NO	1	1.02168	1.03498	1.06267	1.10868	1.47853	16.5437	0.9874	1.02977	1.48029	0.535772	3.98014	0.126015	0.790145
NME4	Nucleoside diphosphate kinase	O00746	RKPFYPALIR	90	NO	1	1.00943	1.29606	1.33937	1.29232	1.25696	0.027574	0.9705	0.99868	1.29748	0.504951	2.19793	0.536418	2.57506
DHX35	Probable ATP-dependent RNA helicase DHX35	Q9H5Z1	ALGIDNVLR	436	NO	1	1.21285	1.3263	1.33977	1.33774	1.43782	0.0175398	0.963	0.999255	1.49565	0.537084	2.49663	0.301614	1.5385
CUL3	Cullin-3	Q13618	NAIQEIQR	39	NO	1	0.964052	1.05775	1.08998	1.20203	1.38124	10.2671	0.9705	0.989539	1.47104	0.540037	4.31138	0.266289	2.4128
PRKDC	DNA-dependent protein kinase catalytic subunit	P78527	VVQMLGSLGGQINK	855	NO	1	0.933884	1.06255	1.11588	1.19399	1.47434	13.2887	0.9365	0.981683	1.58598	0.540285	2.08061	0.337519	1.82766
GSTM3	Glutathione S-transferase Mu 3	P21266	QFSMFLGK	141	NO	1	0.910408	1.04783	0.833735	1.15003	1.53069	12.0746	0.9109	0.947927	1.53112	0.540739	2.04302	0.342611	1.16788
ELOC	Elongin-C	Q15369	VCMYFTYK	73	NO	1	1.03192	0.916327	1.02806	1.29837	1.39675	4.56309	0.9592	0.983601	1.39972	0.544906	2.54904	0.347486	1.04875
EIF4A1	Eukaryotic initiation factor 4A-I	P60842	KEELTLEGIR	238	NO	1	1.02653	0.966266	1.11526	1.06529	1.53856	19.9825	0.9457	1.02697	1.54003	0.546058	4.72829	0.10758	0.519256
ACACA	Acetyl-CoA carboxylase 1	Q13085	RLLLEDLVK	2221	NO	1	1.06224	1.06103	1.08379	1.21308	1.46808	15.3297	0.9799	1.04228	1.52062	0.546536	3.37287	0.193457	1.08942
SRPRA	Signal recognition particle receptor subunit alpha	P08240	QALQESLVQILQPQRR	387	NO	1	0.858154	0.984602	0.873265	1.12859	1.39998	10.6944	0.9199	0.929	1.4	0.548008	2.05428	0.173149	0.394894
VIRMA	Protein virilizer homolog	Q69YN4	LLELILLDQTVR	534	NO	1	1.01579	0.918865	0.951598	1.02727	1.38669	20.6717	0.9588	0.971586	1.39358	0.548666	2.37232	0.195556	0.605338
INTS1	Integrator complex subunit 1	Q8N201	ILVIGLSR	656	NO	1	0.93615	0.937735	0.990048	1.0342	1.39602	136.011	0.9793	0.962828	1.97936	0.549054	5.27519	0.130748	1.08135
PRKDC	DNA-dependent protein kinase catalytic subunit	P78527	HSSLITPLQAVAQRDPIIAK	2787	NO	1	0.911228	0.993966	1.03223	0.976574	1.53404	25.8597	0.9693	0.982761	1.53405	0.549283	2.99758	-0.11004	0.383758
EIF4A1	Eukaryotic initiation factor 4A-I	P60842	DQIYDIFQK	194	NO	1	0.962906	0.990814	1.02189	0.958476	1.35538	57.4109	0.9759	0.986815	1.36952	0.550995	3.65328	0.0578764	0.25144
PRKDC	DNA-dependent protein kinase catalytic subunit	P78527	AALSALESFLK	311	NO	1	1.03849	1.12493	1.12498	1.23028	1.47295	13.4362	0.9432	1.03198	1.57551	0.553423	3.1092	0.170111	0.761079
CUL4A	Cullin-4A	Q13619	LPDNYTQDTWR	54	NO	1	1.15241	1.1603	1.24165	1.50496	1.55999	1.53017	0.9517	1.02238	1.65574	0.230817	0.306249	0.554998	2.1984
KDM1A	Lysine-specific histone demethylase 1A	O60341	CPLYEANGQAVPK	360	NO	1	0.997308	0.96398	0.968464	0.992841	1.45741	30.7531	0.9943	0.98244	1.46604	0.555544	3.74657	0.135688	0.491646
SART1	U4/U6	O43290	LGLKPLEVNAIK	130	NO	1	0.985336	0.93202	1.29542	1.37329	1.41633	0.751978	0.9853	0.972431	1.39484	0.556415	2.01754	0.46438	1.38555
KNTC1	Kinetochore-associated protein 1	P50748	TLVNNLR	687	NO	1	1.42229	1.57317	1.41276	1.5307	1.63649	0.0151682	0.9118	0.999395	1.89351	0.556426	2.50516	0.277166	0.561842
HNRNPL	Heterogeneous nuclear ribonucleoprotein L	P14866	VFNVFCLYGNVEK	399	NO	1	0.948788	0.997822	1.12554	1.44104	1.40058	1.22627	0.9893	0.982176	1.42093	0.517382	3.92232	0.556705	4.11426
RARS2	Probable arginine--tRNA ligase	Q5T160	LLGITPVCR	569	NO	1	0.947187	1.06916	1.1134	1.15073	1.47686	24.3653	0.9207	1.00956	1.60649	0.557516	4.38636	0.174524	1.49227
ATL3	Atlastin-3	Q6DD88	GLLEYFK	320	NO	1	1.03402	0.986112	1.00845	1.12282	1.55509	14.2535	0.995	1.00714	1.55548	0.558749	4.50749	0.0899359	0.560014
PRKDC	DNA-dependent protein kinase catalytic subunit	P78527	AIRPQIDLKR	255	NO	1	1.03996	1.05788	1.08009	1.02928	1.47989	23.3045	0.9777	1.04128	1.47987	0.560608	3.62761	0.0477973	0.183173
ATR	Serine/threonine-protein kinase ATR	Q13535	MALNSLMSLMK	1150	NO	1	0.860829	1.38146	1.38067	1.52594	1.6033	0.073078	0.9196	0.93036	1.50333	0.519837	1.77677	0.562889	2.08022
VIRMA	Protein virilizer homolog	Q69YN4	VVTAGSAILQK	546	NO	1	0.984076	1.07457	1.0391	1.04907	1.35527	12.4012	0.9473	1.02444	1.35527	0.563498	3.3722	0.184746	1.01957
RELA	Transcription factor p65	Q04206	CIHSFQNLGIQCVK	109	NO	1	0.848816	0.814429	0.779062	1.65005	1.58397	3.41381	0.9615	0.860553	1.61716	0.448496	1.46316	0.564008	2.8662
PRKDC	DNA-dependent protein kinase catalytic subunit	P78527	YAVPSAGLR	265	NO	1	1.05532	1.07758	1.104	1.1353	1.56592	16.8938	0.9723	1.05922	1.56733	0.564135	5.01234	0.153442	1.49455
PHF21A	PHD finger protein 21A	Q96BD5	RVVEQLR	53	NO	1	1.12967	1.00348	1.16271	1.12086	1.57736	24.0472	0.9056	1.07372	1.58981	0.564512	3.9634	0.152101	0.937454
IPO4	Importin-4	Q8TEX9	LLPVLLSTAQEADPEVR	900	NO	1	1.02545	0.937099	1.24333	1.27895	1.28706	0.643722	0.9665	0.987496	1.28309	0.564623	2.12968	0.381556	1.51129
P4HB	Protein disulfide-isomerase	P07237	LKAEGSEIR	70	NO	1	0.950477	1.00542	1.24913	1.59476	1.51687	1.04679	0.9877	0.98517	1.55608	0.591988	3.65811	0.566423	4.12362
KIF5B	Kinesin-1 heavy chain	P33176	SLSALGNVISALAEGSTYVPYRDSK	257	NO	1	0.924193	0.993081	1.06736	1.0615	1.49284	22.3778	0.951	0.995718	1.50756	0.566641	3.82442	0.0445835	0.157681
PRKDC	DNA-dependent protein kinase catalytic subunit	P78527	LQETLSAADR	15	NO	1	0.982126	0.961269	1.03396	1.06766	1.4052	15.1515	0.9794	0.994308	1.40558	0.566926	5.44603	0.0983562	1.15393
ACTN4	Alpha-actinin-4	O43707	GISQEQMQEFR	761	NO	1	0.845365	0.969216	0.911255	1.02237	1.47859	15.0434	0.945	0.93136	1.47882	0.56753	3.64804	0.0376014	0.131907
PRKDC	DNA-dependent protein kinase catalytic subunit	P78527	QGNLSSQVPLKR	3148	NO	1	1.15627	1.01587	1.06118	1.19881	1.46218	11.4814	0.9001	1.05837	1.46231	0.568196	3.20078	0.245234	1.44268
PRPF8	Pre-mRNA-processing-splicing factor 8	Q6P2Q9	ELGGLGMLSMGHVLIPQSDLR	1321	NO	1	1.09186	1.054	1.23071	1.34135	1.42517	1.47157	0.9661	1.02152	1.45444	0.534979	2.67341	0.568652	3.03603
USP16	Ubiquitin carboxyl-terminal hydrolase 16	Q9Y5T5	VLYSLYGVVEHSGTMR	740	NO	1	1.2184	1.2527	1.41088	1.4984	1.4668	0.0474452	0.9699	1.00333	1.52505	0.57332	2.27378	0.569057	2.69265
KIF2C	Kinesin-like protein KIF2C	Q99661	KEIDVISIPSK	276	NO	1	1.13328	1.35601	1.42162	1.57811	1.49	0.0429481	0.9666	0.997425	1.52629	0.56986	2.45664	0.569365	2.42066
FASTKD5	FAST kinase domain-containing protein 5	Q7L8L6	LAVQFTNR	697	NO	1	0.95802	0.983914	0.955371	0.969093	1.39091	54.1599	0.9905	0.97328	1.39775	0.574018	3.74225	-0.0415578	0.194651
PRKDC	DNA-dependent protein kinase catalytic subunit	P78527	IAPYSVEIK	100	NO	1	0.952546	1.01746	1.05714	1.06175	1.38301	15.087	0.9527	1.00673	1.38309	0.574585	3.85852	0.110675	0.762917
HDHD3	Haloacid dehalogenase-like hydrolase domain-containing protein 3	Q9BSH5	LEGILGGLGLR	141	NO	1	1.07332	0.834127	1.00924	1.04289	1.60119	13.3252	0.9091	0.979154	1.60121	0.576369	3.19459	-0.0373479	0.126317
PRPF8	Pre-mRNA-processing-splicing factor 8	Q6P2Q9	SGMSHEEDQLIPNLYR	1355	NO	1	0.830687	1.06965	1.23995	1.45759	1.37041	0.401007	0.9079	0.92489	1.41504	0.412891	2.32653	0.579032	4.9731
DDX6	Probable ATP-dependent RNA helicase DDX6	P26196	SIEEQLGTEIKPIPSNIDK	448	NO	1	1.10336	1.00008	1.15796	1.24346	1.52005	17.1272	0.9356	1.03475	1.64481	0.58014	2.24739	0.0191324	0.0285915
HK2	Hexokinase-2	P52789	SASLCAATLAAVLQR	382	NO	1	1.08208	1.09297	1.07761	1.16887	1.45068	12.0296	0.9569	1.06324	1.45079	0.582032	3.62301	0.278669	1.64973
PLEC	Plectin	Q15149	RDVQLIR	1038	NO	1	1.12645	1.00839	1.14683	1.11478	1.60281	14.8284	0.9282	1.07028	1.60276	0.58424	4.03591	0.14787	0.881628
PSMD5	26S proteasome non-ATPase regulatory subunit 5	Q16401	EVARLEAPLEELR	11	NO	1	1.02774	1.0175	1.00377	1.1001	1.48436	14.1277	0.9973	1.01225	1.48447	0.584605	4.83785	0.121072	1.18826
PSMD5	26S proteasome non-ATPase regulatory subunit 5	Q16401	LEAPLEELR	15	NO	1	1.05332	1.06984	1.12765	1.09733	1.58351	15.6939	0.9639	1.06256	1.58348	0.584919	5.24331	0.10517	0.799574
PRKDC	DNA-dependent protein kinase catalytic subunit	P78527	NILEESLCELVAK	2335	NO	1	1.05765	1.06714	0.983604	1.02064	1.51514	36.39	0.9745	1.02552	1.52021	0.586628	3.61401	0.127184	0.655077
ACACA	Acetyl-CoA carboxylase 1	Q13085	EEGIGPENLR	1789	NO	1	0.973237	0.944392	1.11399	1.18182	1.64519	38.1903	0.9671	0.988032	1.92712	0.588991	3.44061	0.123592	0.544809
KIF5B	Kinesin-1 heavy chain	P33176	ILQDSLGGNCR	285	NO	1	1.00028	1.01388	0.997662	1.09856	1.42451	19.1187	0.9987	1.00268	1.4408	0.591334	5.38369	0.176991	1.87218
MYO1C	Unconventional myosin-Ic	O00159	IICDLVEEKFK	478	NO	1	1.10451	1.05911	1.27228	1.27505	1.55201	4.38555	0.9004	1.01032	1.62239	0.592045	3.10811	0.346752	2.15935
VIRMA	Protein virilizer homolog	Q69YN4	LTELLDLYREDR	385	NO	1	1.00005	1.10887	1.04435	1.19388	1.60671	13.7987	0.9703	1.03826	1.60807	0.593168	3.98085	0.156978	0.848677
ASS1	Argininosuccinate synthase	P00966	IDIVENR	266	NO	1	0.964409	1.03866	0.922798	1.20732	1.64567	12.3332	0.9799	0.981347	1.6465	0.594012	3.57812	0.190813	1.5216
SMG1	Serine/threonine-protein kinase SMG1	Q96Q15	TAEALNLDAALFELIKR	3316	NO	1	0.892323	0.945861	1.01527	1.12646	1.37045	14.9462	0.9507	0.948086	1.43773	0.59423	2.48673	0.210595	0.913614
MROH1	Maestro heat-like repeat-containing protein family member 1	Q8NDA8	VPEIVSVLR	1092	NO	1	0.862359	0.888406	0.956321	1.11539	1.37064	16.1101	0.9381	0.918598	1.43987	0.59455	2.57857	0.194861	0.582257
PDS5A	Sister chromatid cohesion protein PDS5 homolog A	Q29RF7	NLPDPGKAQDFVK	545	NO	1	0.876904	0.967592	1.08171	1.45298	1.72367	6.14862	0.9855	0.941087	1.78642	0.595414	2.16362	-0.320769	0.181384
VPS35	Vacuolar protein sorting-associated protein 35	Q96QK1	LLKIPVDTYNNILTVLK	401	NO	1	1.04039	1.10587	1.14547	1.07613	1.66595	18.3473	0.9583	1.07232	1.66592	0.596304	3.08381	0.10404	0.368042
ASS1	Argininosuccinate synthase	P00966	GQVYILGR	356	NO	1	1.14599	1.00727	1.01878	1.26229	1.70587	13.0405	0.9614	1.0429	1.70862	0.597242	2.2353	0.279958	1.08767
PDCD6	Programmed cell death protein 6	O75340	TYDRDNSGMIDKNELK	101	NO	1	0.826492	1.06274	0.98559	1.09428	1.55346	17.2283	0.9003	0.968433	1.56191	0.598619	2.71354	0.0413418	0.0869785
G6PD	Glucose-6-phosphate 1-dehydrogenase	P11413	VQPNEAVYTK	394	NO	1	1.08917	1.08195	1.11574	1.17681	1.51757	13.0227	0.9551	1.0717	1.51759	0.600411	5.66495	0.169749	1.72509
MVD	Diphosphomevalonate decarboxylase	P53602	KLTGSTVGMR	207	NO	1	0.881627	1.00135	1.11298	1.33521	1.32907	1.24996	0.9482	0.954671	1.34312	0.601873	2.11098	0.484793	1.53978
LARS2	Leucine--tRNA ligase	Q15031	LWTLTTR	695	NO	1	1.15062	1.18194	1.04101	1.36719	1.78114	10.899	0.9458	1.09339	1.78116	0.60202	2.3521	0.271671	1.1052
JUP	Junction plakoglobin	P14923	AAMIVNQLSKK	162	NO	1	1.005	1.22578	1.25964	1.39644	1.56782	3.95657	0.9543	0.984517	1.73986	0.602237	2.24898	0.27371	0.76562
UBE4A	Ubiquitin conjugation factor E4 A	Q14139	SYSPTLFAQTVR	938	NO	1	1.05275	1.03084	1.1439	1.09305	1.53586	17.5305	0.9419	1.05686	1.53606	0.604221	2.55436	0.0112723	0.0173582
GATB	Glutamyl-tRNA(Gln) amidotransferase subunit B	O75879	EGKTPGQIVSEK	479	NO	1	1.08326	1.25674	1.28755	1.49659	1.75534	5.64096	0.9716	1.00358	1.97041	0.60503	2.25431	0.347685	1.01816
HUWE1	E3 ubiquitin-protein ligase HUWE1	Q7Z6Z7	VCDLIMTAIKR	1461	NO	1	1.01476	1.12743	1.11392	1.21537	1.3812	4.40932	0.9239	0.998511	1.43777	0.606208	2.00951	0.460946	1.51934
TTLL12	Tubulin--tyrosine ligase-like protein 12	Q14166	AMYAVDLMLK	579	NO	1	0.652136	1.07692	1.24833	1.44956	2.06847	36.6842	0.9071	0.870752	2.76931	0.920925	2.5198	0.607055	3.17507
PDCD6IP	Programmed cell death 6-interacting protein	Q8WUM4	FGEEIAR	270	NO	1	1.01808	1.03318	1.22865	1.26601	1.74882	20.998	0.9415	1.01811	1.95432	0.608614	2.32215	0.327011	1.15678
WDFY3	WD repeat and FYVE domain-containing protein 3	Q8IZQ1	LFIYLYK	768	NO	1	0.964614	1.09654	1.19802	1.21455	1.40177	6.12303	0.9242	0.977646	1.51589	0.609301	2.36667	0.300103	1.03401
PRKDC	DNA-dependent protein kinase catalytic subunit	P78527	LAAVVSACK	1448	NO	1	1.00743	1.01195	1.05075	1.16398	1.57172	12.9055	0.9938	1.01753	1.57187	0.610603	4.23785	0.0734335	0.271387
PAFAH1B2	Platelet-activating factor acetylhydrolase IB subunit alpha2	P68402	SQGDSNPAAIPHAAEDIQGDDRWMSQHNR	2	NO	1	0.932581	1.08313	1.18411	1.20945	1.52735	15.259	0.9113	0.975777	1.699	0.612198	2.05068	0.376192	1.49685
USP28	Ubiquitin carboxyl-terminal hydrolase 28	Q96RU2	SSEEQQQDVSEFTHK	248	NO	1	0.976673	1.16747	1.09711	1.26657	1.6885	13.6419	0.9322	1.05989	1.6943	0.61318	2.56967	0.313396	1.11458
PRKDC	DNA-dependent protein kinase catalytic subunit	P78527	HGDLPDIQIK	2777	NO	1	1.07562	1.09489	1.13229	1.11137	1.57935	17.4225	0.9569	1.07569	1.5795	0.613342	4.71186	0.135868	0.80965
PRKDC	DNA-dependent protein kinase catalytic subunit	P78527	CFFLSKIEEK	3187	NO	1	0.993891	0.937992	0.908185	1.09638	1.41644	12.0837	0.966	0.960016	1.41647	0.613678	3.718	0.251807	1.29437
CEP170	Centrosomal protein of 170 kDa	Q5SW79	SSGSLGHRPSQEMDK	463	NO	1	0.874687	1.34193	1.59713	1.54512	1.45431	0.0825077	0.9588	0.937316	1.53222	0.52047	1.56471	0.613886	2.06222
GATB	Glutamyl-tRNA(Gln) amidotransferase subunit B	O75879	VDANISVHHPGEPLGVR	260	NO	1	0.969934	1.1193	1.08544	1.14263	1.55196	13.6708	0.9331	1.04366	1.55204	0.61554	4.70814	0.154369	0.893536
PPP2R1A	Serine/threonine-protein phosphatase 2A 65 kDa regulatory subunit A alpha isoform	P30153	VKEFCENLSADCR	306	NO	1	1.13861	1.16519	1.21136	1.35552	1.69106	9.97993	0.9357	1.06631	1.79992	0.616111	3.16341	0.28955	1.16324
THAP12	52 kDa repressor of the inhibitor of the protein kinase	O43422	VLCILPVMK	683	NO	1	1.18281	1.26043	1.18767	1.72608	1.69586	1.73734	0.9187	1.14778	1.71105	0.411722	0.717484	0.616928	2.39984
BLVRA	Biliverdin reductase A	P53004	SGSLENVPNVGVNK	235	NO	1	0.936702	1.06253	1.12556	1.14386	1.53818	15.1401	0.9124	1.03105	1.53979	0.617077	4.60776	0.262126	2.26694
GCN1	Stalled ribosome sensor GCN1	Q92616	HLGVILPAVMLALK	2108	NO	1	0.80001	0.997996	1.11129	1.22363	1.55061	14.5165	0.9049	0.918077	1.73041	0.617505	3.23399	0.187002	0.51082
PRKDC	DNA-dependent protein kinase catalytic subunit	P78527	EQQHVMEELFQSSFR	1769	NO	1	0.995322	1.0035	1.05876	1.13698	1.58063	29.337	0.992	1.01064	1.69351	0.619024	3.50102	0.253612	1.72211
STARD10	START domain-containing protein 10	Q9Y365	AVSIQTGYLIQSTGPK	164	NO	1	0.987862	0.942561	1.03232	0.997554	1.44769	26.1348	0.9766	0.990675	1.44903	0.620169	5.00044	0.105145	0.587105
POLD2	DNA polymerase delta subunit 2	P49005	CCVVGTLFK	91	NO	1	1.14326	1.20815	1.32969	1.51167	1.6682	2.12268	0.9929	1.00549	1.81797	0.621768	2.54356	0.562747	2.22091
VPS35	Vacuolar protein sorting-associated protein 35	Q96QK1	ILVGTNLVR	218	NO	1	0.998405	1.0406	1.01731	1.14387	1.55071	13.2476	0.995	1.01409	1.55088	0.623796	6.28431	0.135097	1.22019
FLNA	Filamin-A	P21333	YAPSEAGLHEMDIR	1832	NO	1	0.973597	0.990839	1.10916	1.04601	1.58085	20.356	0.9581	1.01832	1.58159	0.624333	2.19411	0.102369	0.158153
RNF213	E3 ubiquitin-protein ligase RNF213	Q63HN8	FLQGKPR	4964	NO	1	1.19406	1.09216	1.06146	1.09429	1.80789	18.6816	0.9563	1.08673	1.80789	0.62614	2.03446	0.0974222	0.163343
PRKDC	DNA-dependent protein kinase catalytic subunit	P78527	LSFAVPFR	892	NO	1	1.10877	1.14932	1.06072	1.20185	1.56353	12.9964	0.938	1.07973	1.56367	0.628638	4.23866	0.166115	1.04827
CLTC	Clathrin heavy chain 1	Q00610	ESNCYDPERVK	750	NO	1	0.903138	0.911867	0.895776	0.998098	1.36577	19.3745	0.9558	0.927724	1.37262	0.628724	2.82175	0.167584	0.523756
MARS1	Methionine--tRNA ligase	P56192	LENDQIESLR	805	NO	1	1.02495	1.04116	1.07956	1.09735	1.56768	16.2509	0.9855	1.03642	1.56793	0.628866	4.75701	0.204732	2.27693
EIF4A1	Eukaryotic initiation factor 4A-I	P60842	GFKDQIYDIFQK	191	NO	1	0.844821	0.906065	0.986334	0.977736	1.51686	23.8265	0.9458	0.934268	1.52575	0.632648	5.2344	0.06604	0.38873
G6PD	Glucose-6-phosphate 1-dehydrogenase	P11413	LILDVFCGSQMHFVR	440	NO	1	0.909709	0.925168	1.06582	1.33863	1.45619	3.30954	0.9791	0.942935	1.46643	0.633158	4.77084	0.555464	3.13118
ITCH	E3 ubiquitin-protein ligase Itchy homolog	Q96J02	AKVQYFR	530	NO	1	1.17071	1.28215	1.32979	1.49353	1.66971	1.86265	0.9799	1.00013	1.83891	0.633253	2.85983	0.438291	1.76451
HDHD3	Haloacid dehalogenase-like hydrolase domain-containing protein 3	Q9BSH5	AHGLEVEPSALEQGFR	35	NO	1	1.01931	0.973891	0.961124	1.07427	1.64206	22.1199	0.994	0.988508	1.65905	0.634141	4.1108	-0.0462179	0.118913
EIF4A1	Eukaryotic initiation factor 4A-I	P60842	ILVKKEELTLEGIR	234	NO	1	1.02797	1.03816	1.13388	1.1223	1.518	15.2567	0.9453	1.05006	1.51828	0.634729	4.64256	0.168164	0.931821
OSBPL8	Oxysterol-binding protein-related protein 8	Q9BZF1	YVLEEAQR	707	NO	1	1.31254	1.23776	1.45642	1.4677	1.58642	0.359115	0.9295	0.999721	1.75787	0.639693	2.32795	0.345971	0.98907
PRPF8	Pre-mRNA-processing-splicing factor 8	Q6P2Q9	KFGFVDAQKEDMPPEHVR	50	NO	1	1.35302	1.3007	1.66312	1.64039	1.78036	0.239675	0.9273	1.00278	1.94747	0.61182	2.13998	0.640939	2.32035
USP1	Ubiquitin carboxyl-terminal hydrolase 1	O94782	WAISQFASVER	487	NO	1	0.901078	1.07272	1.24725	1.25431	1.56091	14.1709	0.9033	0.954463	1.78772	0.641932	2.8301	0.0694465	0.0764052
STARD10	START domain-containing protein 10	Q9Y365	SCVITYLAQVDPK	180	NO	1	1.08535	1.06536	1.06644	1.05525	1.62405	20.7094	0.9847	1.05367	1.62404	0.642007	5.88235	0.120263	0.908715
ACACA	Acetyl-CoA carboxylase 1	Q13085	TIQVENSHLILTGAGALNK	1838	NO	1	1.03328	1.24113	1.37786	1.38424	1.56768	0.280693	0.9439	0.982254	1.55647	0.647832	4.52331	0.372377	2.70235
P4HB	Protein disulfide-isomerase	P07237	VDATEESDLAQQYGVR	82	NO	1	1.08269	1.11995	1.25701	1.5736	1.67884	2.31007	0.9899	1.03823	1.72909	0.769101	6.55627	0.648693	7.51527
PRKDC	DNA-dependent protein kinase catalytic subunit	P78527	LATTILQHWK	1618	NO	1	1.08455	1.06149	1.11006	1.33848	1.75522	17.2699	0.9898	1.04934	1.8729	0.64891	3.16484	0.26706	1.1724
DDX1	ATP-dependent RNA helicase DDX1	Q92499	LQVIVCSATLHSFDVKK	401	NO	1	0.974136	1.03986	1.01499	1.07337	1.65344	18.6533	0.9933	1.00724	1.65529	0.649356	3.84542	0.0854272	0.343532
NUP205	Nuclear pore complex protein Nup205	Q92621	SRYSFIQALVR	1991	NO	1	1.01541	1.10218	1.07325	1.16056	1.71323	17.1316	0.9808	1.04767	1.7168	0.650652	2.83727	0.104879	0.304162
CDC37	Hsp90 co-chaperone Cdc37	Q16543	QYMEGFNDELEAFKER	247	NO	1	0.960825	1.05101	1.16406	1.37618	1.61581	10.7068	0.9938	0.978257	1.80303	0.651324	4.17305	0.397834	2.23542
EZR	Ezrin	P15311	GMLKDNAMLEYLK	181	NO	1	0.868395	1.1602	1.34572	1.52855	1.50686	0.261334	0.9491	0.935379	1.51986	0.414871	0.666178	0.652514	2.44235
EIF3E	Eukaryotic translation initiation factor 3 subunit E	P60228	QEYLDTLYR	125	NO	1	1.15926	1.04094	1.1531	1.20006	1.61514	14.7053	0.9202	1.08829	1.6159	0.653796	3.90047	0.249317	1.20811
GLUD1	Glutamate dehydrogenase 1	P00367	GASIVEDKLVEDLR	77	NO	1	0.961538	1.04697	1.00837	1.05932	1.55429	18.6274	0.9852	1.00421	1.55574	0.659308	6.76155	0.084682	1.3478
EIF4A1	Eukaryotic initiation factor 4A-I	P60842	VFDMLNRR	162	NO	1	0.957731	0.999298	1.08659	1.07728	1.59382	22.5562	0.969	1.01061	1.60726	0.659427	4.64132	0.107123	0.514515
ORC3	Origin recognition complex subunit 3	Q9UBD5	LISQLMDCCVDIK	151	NO	1	0.781404	0.98714	1.04276	1.04315	1.64586	17.7406	0.9043	0.952692	1.64809	0.660061	3.45328	0.129897	0.482923
AHCYL2	Adenosylhomocysteinase 3	Q96HN2	SQVDHVIWPDGKR	502	NO	1	1.09618	0.966391	1.40885	1.5488	1.73949	0.863019	0.9465	1.02079	1.64424	0.657669	1.64846	0.6607	3.42723
PRKDC	DNA-dependent protein kinase catalytic subunit	P78527	FNNYVDCMKK	1736	NO	1	1.02398	0.912444	0.978241	1.03476	1.61584	17.0488	0.9795	0.97867	1.61611	0.660958	4.02674	0.12469	0.657483
PRKDC	DNA-dependent protein kinase catalytic subunit	P78527	SIELFYK	1187	NO	1	0.999268	1.0436	1.0062	1.20349	1.5625	12.5511	0.9946	1.01216	1.56419	0.663337	3.88467	0.134293	0.597088
USP14	Ubiquitin carboxyl-terminal hydrolase 14	P54578	YLFTGLK	285	NO	1	0.975757	1.23367	1.53174	1.55076	1.35408	0.0998967	0.9243	0.987727	1.47887	0.664797	2.58654	0.663509	2.80649
P4HB	Protein disulfide-isomerase	P07237	EADDIVNWLK	121	NO	1	1.13272	1.07412	1.26641	1.573	1.70919	2.59703	0.9791	1.05363	1.73909	0.626232	3.47097	0.664049	5.0538
WAPL	Wings apart-like protein homolog	Q7Z5K2	VIEYLEHC	1183	NO	1	1.11911	1.25738	1.63932	1.51349	1.75954	0.145318	0.9198	1.02884	1.66459	0.664649	2.53132	0.438504	1.52738
EIF4A1	Eukaryotic initiation factor 4A-I	P60842	AILPCIK	62	NO	1	0.931688	0.983145	0.993864	1.03018	1.56522	18.2487	0.9897	0.97717	1.56607	0.664753	5.86182	0.139501	1.07953
ACTN4	Alpha-actinin-4	O43707	LSNRPAFMPSEGK	366	NO	1	0.966789	0.935154	0.910681	0.980191	1.59454	25.0016	0.9868	0.953163	1.60014	0.664873	5.12881	0.00650193	0.0204245
IRS1	Insulin receptor substrate 1	P35568	LGPAPPGAASICRPTR	965	NO	1	1.01186	1.0533	1.20252	1.25944	1.50395	8.35277	0.9653	0.99174	1.62458	0.665519	3.65187	0.476118	2.42015
RNF20	E3 ubiquitin-protein ligase BRE1A	Q5VTR2	KAMEAAQLADDLK	836	NO	1	1.12141	1.22454	1.5453	1.629	1.64537	0.201398	0.9894	1.0274	1.65631	0.450017	1.14787	0.666516	2.10364
PRKDC	DNA-dependent protein kinase catalytic subunit	P78527	GIAPGDER	1490	NO	1	1.00934	0.933819	0.961565	1.05312	1.6208	21.2895	0.9891	0.976113	1.6312	0.667066	4.29518	0.0716459	0.391346
MCCC1	Methylcrotonoyl-CoA carboxylase subunit alpha	Q96RQ3	LVVWAADR	437	NO	1	1.0756	1.01451	1.0085	1.14311	1.61404	18.1551	0.9873	1.0246	1.62465	0.668559	3.94532	0.188603	1.07201
PRKDC	DNA-dependent protein kinase catalytic subunit	P78527	LGASLAFNNIYR	1076	NO	1	1.12691	1.16835	1.05553	1.12038	1.76305	20.638	0.957	1.08768	1.76407	0.672545	3.4091	0.0951553	0.347895
OSBPL2	Oxysterol-binding protein-related protein 2	Q9H1P3	TSLPAPMFSR	62	NO	1	1.15033	1.23271	1.07225	1.23969	1.81875	16.5432	0.9295	1.11381	1.82171	0.672657	2.7845	0.272601	1.05573
ACACA	Acetyl-CoA carboxylase 1	Q13085	LLLEDLVK	2222	NO	1	1.03242	1.10768	1.17057	1.31293	1.56779	6.90521	0.9752	1.01018	1.65884	0.672985	5.61406	0.331789	3.38483
PRKDC	DNA-dependent protein kinase catalytic subunit	P78527	CFGTGAAGNR	1312	NO	1	1.03975	0.953311	0.954784	1.09507	1.36404	14.1825	0.957	0.986982	1.36623	0.673562	2.64013	0.339375	1.19478
KIF5B	Kinesin-1 heavy chain	P33176	VFQSSTSQEQVYNDCAK	51	NO	1	0.966183	1.02245	1.00638	1.19344	1.47158	13.5106	0.9916	0.995644	1.49853	0.674083	3.8716	0.244014	1.06235
EIF4A1	Eukaryotic initiation factor 4A-I	P60842	LQMEAPHIIVGTPGR	147	NO	1	0.959465	1.02142	1.10209	1.10368	1.70869	32.2127	0.9731	1.01919	1.80284	0.675315	4.95706	0.149488	1.16393
ALDH6A1	Methylmalonate-semialdehyde/malonate-semialdehyde dehydrogenase [acylating]	Q02252	YQQLIKENLK	108	NO	1	1.02303	0.838222	0.867501	0.922728	1.4646	32.5214	0.9017	0.930271	1.4648	0.678979	2.40705	0.0358768	0.0630754
TOMM34	Mitochondrial import receptor subunit TOM34	Q15785	DCTSALALVPFSIKPLLR	73	NO	1	1.06877	1.0501	1.11716	1.48851	1.6301	4.23936	0.9931	1.03724	1.63987	0.679176	3.20347	0.578364	2.65966
CCT2	T-complex protein 1 subunit beta	P78371	FRQDLMNIAGTTLSSK	155	NO	1	0.726986	0.919182	1.2711	1.92235	1.87173	1.15488	0.9682	0.881907	1.89742	0.680149	2.15558	0.503334	0.74246
VPS35	Vacuolar protein sorting-associated protein 35	Q96QK1	YKQIVLTGILEQVVNCR	238	NO	1	1.10319	1.04292	1.05277	1.15953	1.53229	14.3849	0.9719	1.04971	1.53299	0.680245	2.4053	0.266709	0.749906
ATR	Serine/threonine-protein kinase ATR	Q13535	GDVHQALIVLQK	1967	NO	1	0.929754	0.963146	1.38977	1.47287	1.60139	0.621198	0.9756	0.960999	1.53832	0.681652	2.56452	0.333015	0.842556
PRKDC	DNA-dependent protein kinase catalytic subunit	P78527	LACDVDQVTR	972	NO	1	1.01624	1.00221	1.09967	1.14073	1.49972	23.482	0.9677	1.02353	1.56922	0.684526	4.4019	0.291059	2.03871
EIF3E	Eukaryotic translation initiation factor 3 subunit E	P60228	EIYNEKELLQGK	30	NO	1	1.16774	1.25121	1.48286	1.69576	1.62714	0.214771	0.9707	1.02004	1.69549	0.684685	2.21992	0.586497	2.0129
QRSL1	Glutamyl-tRNA(Gln) amidotransferase subunit A	Q9H0R6	NPAAHCGLVGFKPSYGLVSR	198	NO	1	0.980616	0.957628	1.06265	1.09686	1.49844	15.6093	0.9703	1.00014	1.49972	0.688151	2.02032	0.242018	0.545313
PRKDC	DNA-dependent protein kinase catalytic subunit	P78527	CGAALAGHQLIR	25	NO	1	1.04542	1.02959	1.0451	1.23539	1.74088	13.3825	0.9967	1.02996	1.74229	0.690936	4.81059	0.194006	1.22034
GLUD1	Glutamate dehydrogenase 1	P00367	MVEGFFDR	69	NO	1	0.897364	1.05771	1.07155	1.1199	1.63521	22.1922	0.9445	1.00538	1.66979	0.691585	5.94153	0.172993	1.2494
EPRS1	Bifunctional glutamate/proline--tRNA ligase	P07814	QFIAAQGSSR	473	NO	1	1.17188	1.12249	1.09915	1.25952	1.62185	11.7706	0.9341	1.09838	1.62187	0.692625	3.97125	0.311627	1.88297
UBE2I	SUMO-conjugating enzyme UBC9	P63279	MLFKDDYPSSPPK	62	NO	1	0.843036	1.39082	1.62129	1.62727	1.59528	0.0847313	0.9782	0.921502	1.61462	0.693472	2.12434	0.695922	1.96994
VPS35	Vacuolar protein sorting-associated protein 35	Q96QK1	QIVLTGILEQVVNCR	240	NO	1	1.11025	1.11948	1.09895	1.19569	1.67693	14.47	0.9685	1.08207	1.67715	0.69404	6.45099	0.19561	1.86036
INPP4A	Inositol polyphosphate-4-phosphatase type I A	Q96PE3	SDQRPPVTR	177	NO	1	0.95534	1.05421	1.81569	1.60388	1.59007	0.156355	0.9531	0.977535	1.66987	-0.561289	0.197252	0.694855	2.00722
EIF4A1	Eukaryotic initiation factor 4A-I	P60842	MFVLDEADEMLSR	178	NO	1	0.829362	1.02238	1.09767	1.06507	1.69176	27.0242	0.9125	0.986442	1.73589	0.696972	6.8759	0.134726	0.810499
PSMD5	26S proteasome non-ATPase regulatory subunit 5	Q16401	TTLCVSILER	61	NO	1	0.906118	1.12654	1.13787	1.39364	1.9001	28.3331	0.9683	0.991626	2.28616	0.697968	2.67038	0.275459	0.884748
GANAB	Neutral alpha-glucosidase AB	Q14697	KLVAIVDPHIK	462	NO	1	1.07459	1.17229	1.28398	1.43578	1.54356	1.35337	0.9987	0.998705	1.63337	0.698514	2.18068	0.609413	1.95872
EIF4A1	Eukaryotic initiation factor 4A-I	P60842	GIYAYGFEKPSAIQQR	46	NO	1	0.994445	0.962655	1.03114	1.09074	1.59653	17.4901	0.9919	0.997011	1.5996	0.698777	7.0469	0.12253	1.09646
PRKDC	DNA-dependent protein kinase catalytic subunit	P78527	TSPQEGERYNYSK	1322	NO	1	0.994532	1.00191	1.08086	1.1523	1.41063	22.2154	0.9803	1.00289	1.51954	0.698837	2.43365	0.383541	1.22636
EPRS1	Bifunctional glutamate/proline--tRNA ligase	P07814	NPEVGLKPVWYSPK	536	NO	1	0.891237	1.14152	1.3624	1.53269	1.46122	0.226775	0.9579	0.944841	1.49273	0.814896	1.84249	0.69901	2.07659
EIF4A1	Eukaryotic initiation factor 4A-I	P60842	GYDVIAQAQSGTGK	69	NO	1	1.00329	0.959401	1.06529	1.08285	1.51326	17.6192	0.9729	1.00694	1.5157	0.700339	5.36345	0.181528	1.83072
VPS35	Vacuolar protein sorting-associated protein 35	Q96QK1	NIIIALIDR	297	NO	1	0.913732	1.07033	1.1956	1.17642	1.77141	29.4417	0.9125	1.03612	1.91188	0.702147	4.17709	0.17811	0.839946
DOCK6	Dedicator of cytokinesis protein 6	Q96HP0	EVYAPHTSYR	539	NO	1	1.05631	1.19484	1.37046	1.48804	1.37466	0.123493	0.9608	1.00801	1.43098	0.704463	2.03984	0.43387	0.725736
EIF4A1	Eukaryotic initiation factor 4A-I	P60842	AEVQKLQMEAPHIIVGTPGR	142	NO	1	0.944132	1.12217	0.932957	1.15237	1.60108	14.8109	0.9277	0.999804	1.60416	0.705234	2.37597	0.243754	0.665797
G6PD	Glucose-6-phosphate 1-dehydrogenase	P11413	LQFHDVAGDIFHQQCK	371	NO	1	0.863545	1.02971	1.02744	1.12695	1.62838	18.2129	0.9478	0.979209	1.64729	0.70661	2.75348	0.198115	0.556819
KIF5B	Kinesin-1 heavy chain	P33176	HVAVTNMNEHSSR	191	NO	1	0.859501	0.990843	0.966731	1.19889	1.50064	12.8091	0.9539	0.948422	1.54125	0.707426	3.32515	0.265609	1.22107
MCCC1	Methylcrotonoyl-CoA carboxylase subunit alpha	Q96RQ3	IAAGEKIPLSQEEITLQGHAFEAR	362	NO	1	0.929781	1.07699	1.01013	1.06297	1.64353	19.5979	0.9681	1.00419	1.646	0.708247	5.7558	0.0987136	0.821254
PRKDC	DNA-dependent protein kinase catalytic subunit	P78527	LLSITVR	669	NO	1	0.940394	1.0143	0.991149	1.00374	1.69555	20.9018	0.9926	0.986395	1.69584	0.710808	2.75933	0.0229489	0.0652692
AHCYL2	Adenosylhomocysteinase 3	Q96HN2	NGPFKPNYYRY	601	NO	1	0.882429	1.11886	1.12567	1.23521	1.66493	21.3093	0.9098	0.993023	1.85185	0.712694	2.0211	0.2599	0.89779
PRKDC	DNA-dependent protein kinase catalytic subunit	P78527	VCLDIIYK	2434	NO	1	0.922399	0.921553	1.05295	1.0238	1.77199	20.8359	0.9768	0.974216	1.7744	0.712894	4.2372	0.0314601	0.0846914
DDX1	ATP-dependent RNA helicase DDX1	Q92499	DQLSVLENGVDIVVGTPGRLDDLVSTGK	331	NO	1	1.03444	1.1871	1.00057	1.04614	1.78151	35.0244	0.9485	1.05334	1.78574	0.714404	3.89849	-0.115224	0.315411
FASTKD1	FAST kinase domain-containing protein 1	Q53R41	MLAEVLGGINCVK	706	NO	1	1.1048	1.32978	1.45096	1.58622	1.61383	0.114125	0.9927	0.993726	1.62681	0.700014	2.54973	0.714471	2.9992
ATL3	Atlastin-3	Q6DD88	ALASILLQDHIR	45	NO	1	1.04814	1.1545	1.09114	1.20952	1.78922	14.0524	0.9694	1.0735	1.78945	0.714742	4.17413	0.165873	0.897189
PRKDC	DNA-dependent protein kinase catalytic subunit	P78527	ELLNPVVEFVSHPSTTCR	2453	NO	1	0.977511	1.14486	1.0782	1.09684	1.66173	19.6182	0.9454	1.05006	1.66321	0.714847	4.04281	0.119475	0.505058
PRKDC	DNA-dependent protein kinase catalytic subunit	P78527	TFPVLLR	965	NO	1	1.01189	1.07959	1.0659	1.18739	1.54107	14.6036	0.978	1.03886	1.54675	0.718495	4.73199	0.264132	2.17889
THBS1	Thrombospondin-1	P07996	QVTQSYWDTNPTR	1042	NO	1	1.04276	1.16118	1.34605	1.456	1.43605	0.217058	0.9962	1.0034	1.45485	0.450778	1.01408	0.720645	2.73796
EIF4A1	Eukaryotic initiation factor 4A-I	P60842	ELAQQIQK	111	NO	1	0.892965	0.951995	0.947712	1.07276	1.53843	18.3067	0.9798	0.947942	1.55193	0.723171	4.77664	0.0794273	0.584631
ACTN4	Alpha-actinin-4	O43707	LASDLLEWIR	301	NO	1	0.907218	0.956643	1.05975	0.94703	1.69649	30.7189	0.9698	0.974043	1.69677	0.725591	2.97555	0.0511864	0.170558
PRKDC	DNA-dependent protein kinase catalytic subunit	P78527	FLCIFLEK	88	NO	1	0.978929	1.01712	1.1781	1.2558	1.60645	24.8093	0.9688	0.989205	1.86007	0.725914	3.03192	0.475034	2.26374
PRKDC	DNA-dependent protein kinase catalytic subunit	P78527	FYGELALK	156	NO	1	0.997166	1.0931	1.18238	1.20535	1.63326	32.5864	0.9329	1.04025	1.85548	0.729457	4.34727	0.207121	1.49701
ASS1	Argininosuccinate synthase	P00966	MPEFYNR	147	NO	1	1.09348	1.07693	0.963276	1.16444	1.63027	15.4923	0.961	1.03348	1.63293	0.730938	2.52633	0.162786	0.627592
WDR82	WD repeat-containing protein 82	Q6UXN9	LILISTNGSFIR	208	NO	1	0.844104	0.931139	1.0352	1.18916	1.58727	20.4576	0.9558	0.929668	1.7486	0.732501	2.93713	0.2139	1.20009
EIF4A1	Eukaryotic initiation factor 4A-I	P60842	AILPCIKGYDVIAQAQSGTGK	62	NO	1	0.952065	0.949716	0.840895	1.00991	1.54146	16.3199	0.956	0.93567	1.54187	0.73257	4.56677	0.297244	0.706814
MLYCD	Malonyl-CoA decarboxylase	O95822	GFGVDHGQVAEQSAGVLHLR	94	NO	1	1.01233	1.2873	1.21753	1.57386	1.68731	4.02979	0.9197	0.993551	1.89703	0.733431	2.08321	0.457492	1.1879
USP9X	Probable ubiquitin carboxyl-terminal hydrolase FAF-X	Q93008	LLLTAIGYGHVR	1157	NO	1	1.05534	1.32431	1.36602	1.4526	1.86556	11.6961	0.9231	0.995794	2.19405	0.733746	3.31019	0.269476	0.637894
DDX39B	Spliceosome RNA helicase DDX39B	Q13838	HFILDECDKMLEQLDMRR	192	NO	1	0.801839	1.12826	1.73068	1.72278	1.93428	0.225329	0.9602	0.90021	1.82951	0.789935	1.85028	0.735552	2.41693
NUDT9	ADP-ribose pyrophosphatase	Q9BW91	DCGEWAIPGGMVDPGEK	206	NO	1	1.30304	1.78183	1.84314	2.01908	1.68591	0.0156822	0.9231	1.00069	1.85011	0.0539382	0.0377928	0.735566	2.31611
P4HB	Protein disulfide-isomerase	P07237	LAKVDATEESDLAQQYGVR	79	NO	1	1.04172	1.09796	1.25926	1.46875	1.646	3.83811	0.9997	1.00151	1.76336	0.740754	7.51224	0.596547	6.8937
MCCC1	Methylcrotonoyl-CoA carboxylase subunit alpha	Q96RQ3	LNISYTR	545	NO	1	1.0769	1.07025	1.07006	1.22805	1.63694	13.1286	0.9858	1.05424	1.63789	0.743482	4.95681	0.224176	2.0639
MCCC1	Methylcrotonoyl-CoA carboxylase subunit alpha	Q96RQ3	IIEEAPAPGIK	285	NO	1	0.935605	0.981652	1.02665	1.11519	1.58809	26.06	0.9865	0.983578	1.67228	0.743695	6.45707	0.158946	2.02696
ASS1	Argininosuccinate synthase	P00966	FAELVYTGFWHSPECEFVR	317	NO	1	1.55745	1.34625	1.70991	1.99322	2.38983	6.46769	0.9235	1.0407	2.93081	0.85624	1.92415	0.751615	2.34045
P4HB	Protein disulfide-isomerase	P07237	YQLDKDGVVLFK	196	NO	1	0.880403	1.01303	1.24025	1.30067	1.70885	20.4268	0.9355	0.943373	2.01788	0.752402	2.01671	-0.0385618	0.038694
P4HB	Protein disulfide-isomerase	P07237	SNFAEALAAHK	32	NO	1	1.03715	1.0332	1.32214	1.67111	1.75573	1.39866	0.9981	1.0102	1.75732	0.755265	6.52633	0.666899	5.53979
EIF4A1	Eukaryotic initiation factor 4A-I	P60842	FMRDPIR	227	NO	1	0.927566	1.02424	1.10318	0.972902	1.69422	28.1801	0.9585	1.00545	1.69428	0.756424	6.18335	0.0119496	0.0378557
MCCC1	Methylcrotonoyl-CoA carboxylase subunit alpha	Q96RQ3	ESLCQAALGLILKEK	506	NO	1	0.960091	1.02909	1.02682	1.08703	1.64961	19.0876	0.9909	1.00394	1.65432	0.758079	6.808	0.106553	0.859447
IQGAP3	Ras GTPase-activating-like protein IQGAP3	Q86VI3	GVLVEIEDLPASHFR	1546	NO	1	1.11438	1.03445	1.24455	1.80041	1.73049	1.30566	0.9852	1.04957	1.76562	0.758175	2.5144	0.605284	1.46098
HSPA4L	Heat shock 70 kDa protein 4L	O95757	NHPAPFSK	423	NO	1	1.13039	1.10367	1.50835	1.38052	1.38091	0.174408	0.9024	1.06549	1.42338	0.573522	1.78222	0.760256	2.13756
PRKDC	DNA-dependent protein kinase catalytic subunit	P78527	LGNPIVPLNIR	2133	NO	1	0.95596	1.11676	1.12643	1.1423	1.70404	15.3245	0.9408	1.04978	1.70427	0.762224	5.77901	0.262899	2.71843
EIF4A1	Eukaryotic initiation factor 4A-I	P60842	ATQALVLAPTR	100	NO	1	1.09529	1.00834	1.12661	1.20706	1.79006	27.5278	0.9749	1.05326	1.90731	0.762251	5.82957	0.177982	1.33174
P4HB	Protein disulfide-isomerase	P07237	EADDIVNWLKK	121	NO	1	0.996588	1.06291	1.27393	1.69296	1.77974	1.80057	0.9987	1.00505	1.7964	0.781977	5.12525	0.764972	6.9709
EIF4A1	Eukaryotic initiation factor 4A-I	P60842	ATQALVLAPTRELAQQIQK	100	NO	1	1.01931	1.04652	0.968757	0.959782	1.57681	75.2021	0.9819	0.998842	1.75286	0.765718	4.78889	0.0455314	0.181467
GAPDH	Glyceraldehyde-3-phosphate dehydrogenase	P04406	RVIISAPSADAPMFVMGVNHEKYDNSLK	118	NO	1	0.843244	1.38026	1.31088	1.41258	1.4655	0.0518767	0.923	0.921609	1.39648	0.601634	1.2324	0.768977	2.08199
PRKDC	DNA-dependent protein kinase catalytic subunit	P78527	FVPLLPGNR	1194	NO	1	1.13398	1.17837	1.17038	1.23165	1.74367	13.3102	0.938	1.12061	1.74362	0.769263	3.86545	0.249627	1.26473
PYGB	Glycogen phosphorylase	P11216	ARPEYMLPVHFYGR	193	NO	1	0.750055	1.16144	2.06261	1.74863	2.18653	0.12899	0.925	0.875026	1.99933	0.604693	0.735805	0.770594	2.41045
ACTN4	Alpha-actinin-4	O43707	LASDLLEWIRR	301	NO	1	0.929437	0.886311	0.977682	1.12066	1.47447	12.5128	0.9668	0.948289	1.47509	0.773375	2.48987	0.136298	0.275641
BZW1	eIF5-mimic protein 2	Q7L1Q6	LMELFPANKQSVEHFTK	215	NO	1	1.23742	1.74842	1.66717	1.98787	2.02489	0.0510285	0.9315	0.98518	2.03052	0.512635	0.633202	0.773726	2.10534
EIF4A1	Eukaryotic initiation factor 4A-I	P60842	LNSNTQVVLLSATMPSDVLEVTK	203	NO	1	0.913527	1.16786	1.2528	1.31049	1.7396	25.0675	0.9107	0.975502	2.08967	0.773823	5.1579	0.215101	0.804972
G6PD	Glucose-6-phosphate 1-dehydrogenase	P11413	IFTPLLHQIELEKPKPIPYIYGSR	464	NO	1	0.997424	0.867971	0.983142	1.02437	1.63704	25.8145	0.9685	0.962055	1.66151	0.777925	2.16129	0.273558	0.635864
HNRNPA3	Heterogeneous nuclear ribonucleoprotein A3	P51991	WGTLTDCVVMR	58	NO	1	1.15625	1.62531	1.79367	1.92991	2.06331	0.0707691	0.9812	0.980742	2.01176	0.664238	1.19424	0.779133	2.31454
CUL9	Cullin-9	Q8IWT3	ADCLSTGMELLR	2402	NO	1	1.10456	1.07713	1.24868	1.32862	1.45564	1.62216	0.9625	1.0092	1.5085	0.782223	2.45365	0.623523	2.0644
FOCAD	Focadhesin	Q5VW36	SYSGENTASAIAR	1028	NO	1	1.30512	1.27013	1.34447	1.48129	1.71118	2.05331	0.9171	1.00427	1.90136	0.782727	2.93215	0.43659	1.75343
PRKDC	DNA-dependent protein kinase catalytic subunit	P78527	ECREEILK	80	NO	1	1.00834	0.935066	1.06593	1.24277	1.52674	15.1178	0.9804	0.983366	1.63314	0.783813	3.32212	0.317407	0.933277
DDX1	ATP-dependent RNA helicase DDX1	Q92499	LQVIVCSATLHSFDVK	401	NO	1	1.02993	1.06233	1.14977	1.1772	1.84564	16.6473	0.9752	1.06043	1.8473	0.787807	5.54398	0.139874	0.853525
MCCC1	Methylcrotonoyl-CoA carboxylase subunit alpha	Q96RQ3	EGSIEIDIPVPK	624	NO	1	1.00695	1.03455	0.999141	1.13119	1.7158	20.4415	0.9979	1.00999	1.73562	0.788887	6.81468	0.126506	1.55363
P4HB	Protein disulfide-isomerase	P07237	KSNFAEALAAHK	31	NO	1	1.02854	0.971166	1.27102	1.63594	1.62427	1.07468	0.9964	0.999886	1.63015	0.792573	6.22475	0.707099	5.76556
OSBPL1A	Oxysterol-binding protein-related protein 1	Q9BXW6	ITMPVIFNEPLSFLQR	564	NO	1	0.976355	1.08259	0.964208	1.14829	1.95733	19.1924	0.9884	1.00579	1.9686	0.79444	2.6966	0.149356	0.350931
DDX1	ATP-dependent RNA helicase DDX1	Q92499	FLPNAPK	282	NO	1	0.921661	1.01721	1.0248	1.12728	1.73311	30.1079	0.9858	0.988505	1.85903	0.795444	5.34604	0.270188	2.26421
PRKDC	DNA-dependent protein kinase catalytic subunit	P78527	ILDVMYSR	1876	NO	1	0.962365	1.0105	1.04547	1.06887	1.70487	18.8276	0.9912	1.00457	1.70652	0.795855	5.80571	0.106306	0.782324
DDX1	ATP-dependent RNA helicase DDX1	Q92499	ALIVEPSRELAEQTLNNIK	289	NO	1	0.925075	0.957307	1.0752	1.04901	1.67688	21.6882	0.9681	0.989319	1.6834	0.797362	7.78334	0.149794	1.18937
ACTN4	Alpha-actinin-4	O43707	CQLEINFNTLQTK	351	NO	1	1.17948	0.914866	1.05942	1.08067	1.78925	15.2568	0.9255	1.0385	1.78927	0.798085	4.84295	0.105923	0.66542
P4HB	Protein disulfide-isomerase	P07237	ALAPEYAK	58	NO	1	1.03332	1.03561	1.22258	1.61293	1.83045	3.82104	0.9991	1.00968	1.87993	0.799401	6.90244	0.695716	6.60982
URM1	Ubiquitin-related modifier 1	Q9BTM9	VTLPGQEEPWDIR	27	NO	1	1.10055	0.999176	0.961502	0.912412	1.76105	70.7463	0.9624	0.994715	1.87741	0.79996	2.22172	0.163418	0.288437
EFTUD2	116 kDa U5 small nuclear ribonucleoprotein component	Q15029	ILAQVVGDVDTSLPR	380	NO	1	1.07186	0.918538	1.13341	1.37594	1.52507	3.92198	0.9459	0.99836	1.53977	0.804762	2.84745	0.433833	1.03101
PRKDC	DNA-dependent protein kinase catalytic subunit	P78527	MSPYKDILETHLR	1408	NO	1	0.933668	1.06928	1.08494	1.19051	1.62644	24.2167	0.9591	1.01141	1.74951	0.806453	4.25821	0.241749	1.04728
ACACA	Acetyl-CoA carboxylase 1	Q13085	HMEMYADR	2104	NO	1	1.10817	1.12688	1.39655	1.54713	1.80497	4.26526	0.9852	1.00417	1.99551	0.808497	3.64521	0.453602	1.61489
DDX1	ATP-dependent RNA helicase DDX1	Q92499	ELLIIGGVAAR	320	NO	1	1.05555	0.987654	1.06083	1.19502	1.77706	13.5474	0.9907	1.026	1.77728	0.815348	6.0793	0.172791	1.40759
EIF4G3	Eukaryotic translation initiation factor 4 gamma 3	O43432	LKGVIDLVFEK	788	NO	1	0.877932	1.30975	1.47202	2.04569	2.04286	0.846296	0.9527	0.951216	2.1345	0.816455	2.09252	0.554323	0.92004
KIF5B	Kinesin-1 heavy chain	P33176	SHSIFLINVK	204	NO	1	0.924622	0.884691	0.995417	0.97997	1.68013	24.2862	0.9788	0.951172	1.68458	0.817462	3.11642	0.0465914	0.100603
EIF3M	Eukaryotic translation initiation factor 3 subunit M	Q7L2H7	ALKDPNAFLFDHLLTLKPVK	211	NO	1	1.1273	1.57988	1.56889	1.75426	1.95285	0.218803	0.9327	0.981068	2.00863	0.819676	2.33659	0.625489	1.60077
PLOD3	Multifunctional procollagen lysine hydroxylase and glycosyltransferase LH3	O60568	FLRYDCVISSPR	693	NO	1	1.23215	1.43705	1.57737	1.60786	1.90921	2.23478	0.9663	0.994944	2.21198	0.820844	2.88393	0.510358	1.45998
XPO7	Exportin-7	Q9UIA9	GIAFAFNAK	728	NO	1	1.96238	2.15993	2.30009	2.02539	2.35631	0.00181435	0.9485	0.999871	2.22773	0.669921	0.776342	0.821489	2.11387
PRKDC	DNA-dependent protein kinase catalytic subunit	P78527	YFEGVSPK	682	NO	1	1.06234	1.02031	1.15043	1.17406	1.77243	20.2236	0.9686	1.05757	1.78943	0.824314	5.54787	0.15098	1.13537
DDX1	ATP-dependent RNA helicase DDX1	Q92499	ALIVEPSR	289	NO	1	1.09808	1.01254	1.05708	1.1823	1.78273	15.1865	0.9865	1.04191	1.78377	0.82954	6.75399	0.21018	2.59101
EIF3E	Eukaryotic translation initiation factor 3 subunit E	P60228	YLTTAVITNK	256	NO	1	1.11748	1.09964	1.22534	1.28306	1.61622	10.7866	0.9243	1.04228	1.72919	0.830487	3.70612	0.440252	3.08426
HSP90B1	Endoplasmin	P14625	GLFDEYGSKK	396	NO	1	0.866111	1.63681	1.64077	1.83448	1.9154	0.0708174	0.9498	0.932974	1.79691	0.830563	3.57554	0.656103	2.51092
STARD10	START domain-containing protein 10	Q9Y365	ESVQVPDDQDFR	20	NO	1	0.969277	0.967882	1.12297	1.16774	1.73662	34.4375	0.9686	1.00453	1.95322	0.834879	6.90326	0.224431	1.65018
CTPS2	CTP synthase 2	Q9NRF8	KLYGDVPFIEER	466	NO	1	1.06003	1.18624	1.48786	1.83534	1.95147	1.04919	0.9994	1.00829	2.00475	0.836455	3.64218	0.631254	1.8282
MCCC1	Methylcrotonoyl-CoA carboxylase subunit alpha	Q96RQ3	AMTDTFTLQAHDQFSPFSSSSGR	521	NO	1	0.878353	1.06825	1.04809	1.20565	1.84171	18.9835	0.9639	0.996254	1.88566	0.837323	4.22153	0.352911	2.41015
EPS8	Epidermal growth factor receptor kinase substrate 8	Q12929	AALEDSSGSSELQEIMRR	782	NO	1	1.23877	1.29484	1.34098	1.41036	1.70545	2.27487	0.9134	1.00164	1.86577	0.841167	2.76834	0.712056	2.44811
PTPA	Serine/threonine-protein phosphatase 2A activator	Q15257	LVALLNTLDR	112	NO	1	1.0287	0.882548	0.985054	0.98767	1.78577	25.935	0.9782	0.974074	1.7883	0.842552	3.77706	0.0192828	0.0388461
DDX1	ATP-dependent RNA helicase DDX1	Q92499	FLVLDEADGLLSQGYSDFINR	366	NO	1	0.852553	1.13646	0.997811	1.14773	1.85223	15.2567	0.9356	0.996729	1.85317	0.843696	4.07888	-0.125424	0.223082
OSBPL11	Oxysterol-binding protein-related protein 11	Q9BXB4	SVILHLLSQLK	368	NO	1	1.06066	1.02743	1.08787	1.26148	2.00205	14.7318	0.9941	1.04391	2.00425	0.84609	3.04134	0.101789	0.1912
G6PD	Glucose-6-phosphate 1-dehydrogenase	P11413	GPTEADELMKR	488	NO	1	0.75152	0.933143	0.87422	1.33909	2.14653	11.4863	0.9749	0.889655	2.1466	0.848856	2.28076	0.26344	0.662205
PRKDC	DNA-dependent protein kinase catalytic subunit	P78527	INQVFHGSCITEGNELTK	1896	NO	1	0.972116	1.00154	1.0704	1.13106	1.71479	16.8479	0.987	1.0109	1.71791	0.849446	6.57522	0.180231	1.54232
HK1	Hexokinase-1	P19367	ATDCVGHDVVTLLR	625	NO	1	0.97365	1.18685	1.21934	1.32662	1.78668	29.2953	0.9331	1.01994	2.13172	0.851742	5.11366	0.387815	2.07294
LONP1	Lon protease homolog	P36776	RAGVTCIVLPAENKK	904	NO	1	1.47479	1.69183	1.61149	1.73344	2.07865	0.788891	0.9248	0.997067	2.41558	0.856139	3.07789	0.765564	2.74721
HUWE1	E3 ubiquitin-protein ligase HUWE1	Q7Z6Z7	KAIQDPAFSDGIR	517	NO	1	1.09267	1.14713	1.05083	0.993275	1.69074	58.5612	0.9523	1.05674	1.75036	0.859393	2.9054	0.0599732	0.104632
WAPL	Wings apart-like protein homolog	Q7Z5K2	RPNFKPDIQEIPK	48	NO	1	0.96685	1.19518	1.63801	1.5224	1.5871	0.1169	0.984	0.983474	1.58251	0.860525	2.24178	0.618663	1.10937
MDN1	Midasin	Q9NU22	LFACMNPATDVGKR	879	NO	1	0.753518	0.724812	1.06514	1.64363	1.81389	2.68553	0.9526	0.826334	1.81366	0.862115	2.91165	0.484414	0.695499
TRAPPC6A	Trafficking protein particle complex subunit 6A	O75865	FLAFTCGLLR	119	NO	1	0.986969	0.985992	1.11832	1.15753	1.58667	35.118	0.9648	1.00884	1.7912	0.863874	2.07952	0.363976	0.66805
CDK8	Cyclin-dependent kinase 8	P49336	TSNPYHHDQLDR	243	NO	1	1.04779	0.971123	1.55036	1.85983	2.02851	0.857996	0.9844	1.00163	1.95079	0.867091	2.44165	0.76254	2.2719
KIF18A	Kinesin-like protein KIF18A	Q8NI77	SPPSQSVQLNDSLSK	684	NO	1	1.28659	1.12559	1.11604	1.16512	2.19099	20.4213	0.9569	1.132	2.19155	0.869719	2.64717	0.227938	0.319146
ACSF2	Medium-chain acyl-CoA ligase ACSF2	Q96CM8	GYCVMLGYWGEPQK	465	NO	1	0.870309	1.07775	1.37574	1.81222	1.63601	0.782178	0.9487	0.960749	1.72992	0.6107	2.08625	0.871323	4.75241
PDS5B	Sister chromatid cohesion protein PDS5 homolog B	Q9NTI5	DILLVNDHLLNFVR	381	NO	1	0.915672	1.01522	1.07185	1.20733	1.65773	27.6932	0.9764	0.983269	1.8617	0.8744	2.92799	0.411759	1.24358
CRACDL	CRACD-like protein	Q6NV74	SFLITPVKPAVDRK	881	NO	1	1.29748	1.47713	1.94229	1.74744	2.11689	0.0951328	0.9123	0.997818	2.06938	0.87899	2.6609	0.574519	1.56831
MCCC1	Methylcrotonoyl-CoA carboxylase subunit alpha	Q96RQ3	ESLCQAALGLILK	506	NO	1	0.991369	1.03591	0.9177	1.05517	1.73736	22.4452	0.9841	0.98631	1.74782	0.882241	6.66749	0.160513	1.30705
CA5B	Carbonic anhydrase 5B	Q9Y2D0	GGPLEHNYR	117	NO	1	1.03453	1.18208	1.25421	1.49358	1.60385	2.45323	0.9863	0.997037	1.72911	0.889476	3.0907	0.677712	2.073
DHX37	Probable ATP-dependent RNA helicase DHX37	Q8IY37	QIVTAGLGDHLAR	927	NO	1	1.31113	1.09243	2.02	2.17586	2.0309	0.552677	0.9558	1.13418	2.10319	0.891879	2.12409	0.737514	1.54583
HIRIP3	HIRA-interacting protein 3	Q9BW71	LLGSCCSHKER	445	NO	1	0.884016	1.04108	1.38474	1.7635	1.47825	0.616474	0.9073	0.959124	1.61921	0.567383	1.39228	0.89233	2.81906
PRKDC	DNA-dependent protein kinase catalytic subunit	P78527	QCLPSLDLSCK	1498	NO	1	1.14147	0.924848	1.02808	1.21361	1.77051	13.1073	0.9487	1.02358	1.77073	0.897028	3.23556	0.327058	0.931817
EXOC4	Exocyst complex component 4	Q96A65	KMNLHLVLIDELHR	185	NO	1	1.12641	0.916916	1.79897	1.90153	1.54772	0.332153	0.9013	1.01435	1.74961	0.616746	1.63658	0.898897	3.06729
RARS1	Arginine--tRNA ligase	P54136	VEIAGPGFINVHLR	154	NO	1	1.24972	1.11572	1.44796	1.49139	2.26098	16.2802	0.9009	1.12451	2.47444	0.89996	2.11709	0.502988	1.10612
ATIC	Bifunctional purine biosynthesis protein ATIC	P31939	TLHPAVHAGILAR	67	NO	1	1.11049	1.03286	1.14153	1.23774	1.67022	13.4752	0.9569	1.07105	1.67104	0.900541	4.37242	0.44841	2.37576
DDX1	ATP-dependent RNA helicase DDX1	Q92499	DQLSVLENGVDIVVGTPGR	331	NO	1	0.970246	1.08114	1.14871	1.22196	2.02274	37.8303	0.9774	1.04309	2.30402	0.903016	4.27277	0.136588	0.36714
WASHC5	WASH complex subunit 5	Q12768	LASALDLPLLR	589	NO	1	0.941371	1.03252	1.10316	1.22465	1.92678	21.2394	0.981	1.01685	1.9944	0.905415	2.21787	0.468226	1.18602
RNF213	E3 ubiquitin-protein ligase RNF213	Q63HN8	FFPKPYDDSR	2710	NO	1	0.862272	0.878667	0.824092	1.22274	1.59112	10.2156	0.9606	0.891256	1.59114	0.907382	2.99861	0.378738	0.891234
DDX1	ATP-dependent RNA helicase DDX1	Q92499	LRELLIIGGVAAR	318	NO	1	0.980247	1.01045	1.06388	1.25632	1.9533	38.7155	0.9978	1.00304	2.31222	0.908312	7.16174	0.268041	2.59428
SYNE2	Nesprin-2	Q8WXH0	ALVSNLISTKEELMK	3405	NO	1	0.688956	1.61157	1.69897	1.95895	1.97188	0.0795463	0.9312	0.8444	1.87661	0.324036	0.251682	0.911876	2.5303
PRKDC	DNA-dependent protein kinase catalytic subunit	P78527	EMKPVIFLDVFLPR	900	NO	1	0.974238	1.26133	1.31624	1.43314	2.1271	47.2153	0.9315	1.04822	2.7692	0.912768	2.43252	0.457038	1.14808
EIF3E	Eukaryotic translation initiation factor 3 subunit E	P60228	LFIFETFCR	338	NO	1	0.902968	1.03182	1.15054	1.23209	1.70944	29.6897	0.9507	0.981404	1.99078	0.921429	4.54828	0.349523	2.15513
TKFC	Triokinase/FMN cyclase	Q3LXA3	LVNSVAGCADDALAGLVACNPNLQLLQGHR	6	NO	1	0.988045	0.763267	0.947716	1.03752	1.9335	23.0359	0.9577	0.924528	1.95885	0.925867	2.20163	0.0520353	0.0565155
IFT81	Intraflagellar transport protein 81 homolog	Q8WYA0	MLSLLGILK	65	NO	1	1.18477	1.179	1.22454	1.51281	1.71277	4.09336	0.9422	1.07032	1.78967	0.926023	2.41088	0.366274	0.486799
RPTOR	Regulatory-associated protein of mTOR	Q8N122	MPESVNVLQIVK	1243	NO	1	1.29529	1.40847	1.33387	1.55616	1.71058	1.01663	0.9237	0.99889	1.92463	0.927467	2.6788	0.734803	1.96119
MCCC1	Methylcrotonoyl-CoA carboxylase subunit alpha	Q96RQ3	IIEEAPAPGIKSEVR	285	NO	1	1.19793	1.29239	1.00135	1.26241	2.13096	23.0704	0.9268	1.12341	2.16725	0.934526	4.19577	0.136342	0.374231
DDX1	ATP-dependent RNA helicase DDX1	Q92499	MHNQIPQVTSDGKR	387	NO	1	1.01696	1.11931	1.2074	1.23243	1.98804	25.839	0.9599	1.0829	2.07264	0.938915	8.19855	0.317804	3.34958
GLS	Glutaminase kidney isoform	O94925	VPFCLQSCVKPLK	280	NO	1	1.13761	1.15306	1.16842	1.18539	1.69654	14.1203	0.9379	1.11471	1.69651	0.939283	2.34431	0.401023	0.787479
GLUD1	Glutamate dehydrogenase 1	P00367	MVEGFFDRGASIVEDKLVEDLR	69	NO	1	1.27951	1.21851	1.26396	1.30621	2.15004	14.0234	0.9364	1.19035	2.14997	0.944884	2.28275	0.197597	0.310844
FRA10AC1	Protein FRA10AC1	Q70Z53	FVNDYILYYGGKK	80	NO	1	1.19425	1.08432	1.1708	1.21455	1.91784	15.2956	0.9569	1.11241	1.91803	0.949586	3.73637	-0.771979	0.321603
ACTN4	Alpha-actinin-4	O43707	VGWEQLLTTIAR	734	NO	1	0.836931	1.03492	0.946931	0.95786	2.06574	26.6148	0.9786	0.954691	2.06615	0.950818	2.5548	0.119773	0.353754
ESYT1	Extended synaptotagmin-1	Q9BSJ8	IHVLEAQDLIAKDR	651	NO	1	0.992258	1.14641	1.55653	1.95211	1.80028	0.549322	0.9785	1.00185	1.88403	0.637061	1.87519	0.952114	2.82357
COA7	Cytochrome c oxidase assembly factor 7	Q96BR5	GGLTQDLK	83	NO	1	1.33109	1.64597	1.52028	1.89697	2.06238	1.37594	0.9338	0.997577	2.43108	0.956401	3.80721	0.16425	0.111313
LRRC14	Leucine-rich repeat-containing protein 14	Q15048	FNNLGLR	229	NO	1	1.12581	1.11877	1.08411	0.973124	1.73532	54.4247	0.951	1.06032	1.77352	0.958457	2.81904	0.267632	0.521803
ALDH6A1	Methylmalonate-semialdehyde/malonate-semialdehyde dehydrogenase [acylating]	Q02252	VCNLIDSGTKEGASILLDGR	367	NO	1	1.31695	1.27059	1.13602	1.57418	1.97989	10.1061	0.9007	1.18082	1.9805	0.963427	2.72411	0.435334	0.838466
PRKDC	DNA-dependent protein kinase catalytic subunit	P78527	MQLVCCR	453	NO	1	1.09577	0.972359	0.908479	1.26438	2.02352	14.0328	0.979	0.994111	2.02606	0.97069	6.12496	0.325028	2.84158
PLEC	Plectin	Q15149	LSYTQLLRR	3992	NO	1	1.36781	1.70424	1.59527	1.98816	1.97737	0.10505	0.9296	0.997767	2.17023	0.971086	2.46063	0.742042	1.81825
PDHB	Pyruvate dehydrogenase E1 component subunit beta	P11177	TIRPMDMETIEASVMK	270	NO	1	0.956613	1.92127	2.28872	1.95111	2.28873	0.0720515	0.9582	0.978126	2.17624	0.395739	0.23921	0.972931	2.1427
PRKDC	DNA-dependent protein kinase catalytic subunit	P78527	HSPEDPEKYSCFALFVK	693	NO	1	0.97148	1.03209	1.22802	1.14588	2.06407	47.4938	0.954	1.05431	2.37431	0.974648	3.70262	0.076715	0.147495
EIF3E	Eukaryotic translation initiation factor 3 subunit E	P60228	YLTTAVITNKDVR	256	NO	1	1.0881	0.907524	1.19976	1.33962	1.87493	29.498	0.9475	1.01124	2.21187	0.978226	4.66892	0.379256	1.17709
PRKDC	DNA-dependent protein kinase catalytic subunit	P78527	WLLAHCGRPQTECR	1171	NO	1	0.888179	1.19274	1.20149	1.36052	1.83281	27.6172	0.9216	0.984284	2.21689	0.982782	4.98397	0.428443	2.25895
PRKDC	DNA-dependent protein kinase catalytic subunit	P78527	VFLALAAK	464	NO	1	1.02398	1.07297	1.15357	1.19798	2.11639	16.3773	0.9848	1.06262	2.11732	0.982795	6.32459	0.245778	2.24935
MCCC1	Methylcrotonoyl-CoA carboxylase subunit alpha	Q96RQ3	HVEVQVFGDHHGNAVYLFER	255	NO	1	1.26939	1.04445	1.13254	1.51534	2.34907	14.3799	0.9673	1.1099	2.37218	0.983909	3.29163	0.400084	1.4173
PRKDC	DNA-dependent protein kinase catalytic subunit	P78527	LNESTFDTQITK	1858	NO	1	0.820051	0.945382	1.39977	1.49871	1.95265	6.65142	0.9266	0.891814	2.17558	0.990092	3.38265	0.24821	0.420754
ATL3	Atlastin-3	Q6DD88	IYQGEDLPHPK	331	NO	1	1.10404	1.12953	1.19941	1.14425	1.59483	14.5615	0.9038	1.1079	1.59471	0.991536	2.42405	0.50576	1.06478
PRKDC	DNA-dependent protein kinase catalytic subunit	P78527	AYVPALQMAFK	747	NO	1	0.947452	1.03674	1.37974	1.40398	1.99779	41.5313	0.9386	0.968411	2.61882	0.991633	4.38511	0.463048	2.00517
ACACA	Acetyl-CoA carboxylase 1	Q13085	LLLEDLVKK	2222	NO	1	1.18136	1.03309	1.25758	1.32812	2.09278	14.697	0.9446	1.11795	2.09431	0.994223	3.16378	0.342757	0.858453
POLE	DNA polymerase epsilon catalytic subunit A	Q07864	EGFTNDQYQELAEPSSLTYVTR	903	NO	1	1.04681	1.25621	1.58191	1.77662	2.47166	24.5382	0.9773	0.991403	3.23387	1.00506	2.21298	0.768053	1.8059
UBXN4	UBX domain-containing protein 4	Q92575	MLWFQGAIPAAIATAK	1	NO	1	0.988359	0.963884	1.03543	1.3479	2.4121	28.6366	0.9992	0.989349	2.70808	1.01679	3.61386	0.426628	2.01582
DAXX	Death domain-associated protein 6	Q9UER7	SLAMSRLDEVISK	366	NO	1	0.872017	2.08692	2.25201	2.36704	2.04374	0.0630663	0.9714	0.935903	2.22096	0.753202	1.3105	1.01887	2.08723
PLEKHG4B	Pleckstrin homology domain-containing family G member 4B	Q96PX9	HGNDLLAMDAIR	980	NO	1	0.816277	1.22339	1.4257	1.7815	2.06115	1.97565	0.9588	0.916819	2.17694	1.02259	2.33716	0.566715	1.18069
PRKDC	DNA-dependent protein kinase catalytic subunit	P78527	VFLALAAKGPVLR	464	NO	1	1.0037	0.984917	1.28804	1.12881	2.28132	24.1105	0.9495	1.06911	2.29136	1.03044	4.01572	0.146918	0.379723
NUP205	Nuclear pore complex protein Nup205	Q92621	QCLGLLSR	1714	NO	1	0.905003	0.97689	1.1911	0.936065	1.80762	30.8681	0.9152	1.00178	1.8077	1.03208	2.59274	0.241216	0.421523
SYMPK	Symplekin	Q92797	RSVASQFFTQEEGPGIDGMTTSER	12	NO	1	2.04877	2.50102	2.12926	2.09378	2.24754	129140	0.9015	3.41015	1.0008	1.04741	2.74061	0.966718	2.41638
RNF213	E3 ubiquitin-protein ligase RNF213	Q63HN8	ITVEYLQHIVEQK	4747	NO	1	1.12167	1.03669	1.04646	1.29085	1.75912	12.5806	0.9812	1.05111	1.76075	1.05364	2.09108	0.562152	0.91451
ACTN4	Alpha-actinin-4	O43707	HTNYTMEHIR	724	NO	1	1.01261	0.918386	1.29514	1.07588	2.2924	31.9978	0.9397	1.05619	2.31523	1.05425	4.38383	0.127541	0.256865
PRKDC	DNA-dependent protein kinase catalytic subunit	P78527	NCISTVVHQGLIR	477	NO	1	0.912257	1.00768	1.05602	1.09465	1.986	14.3499	0.9867	0.99399	1.98601	1.05833	7.42654	0.211917	1.8514
OSBP	Oxysterol-binding protein 1	P22059	VQPVIGENGGDAR	655	NO	1	0.980787	1.08443	1.13774	1.26894	1.93547	13.292	0.9749	1.05072	1.93577	1.05976	6.78156	0.360711	3.46229
PRKDC	DNA-dependent protein kinase catalytic subunit	P78527	SLGPPQGEEDSVPR	2107	NO	1	1.10661	1.07172	1.27873	1.18517	1.89933	46.0218	0.9237	1.11066	2.13398	1.06149	5.45883	0.399262	1.96088
MCCC1	Methylcrotonoyl-CoA carboxylase subunit alpha	Q96RQ3	QEGIIFIGPPPSAIR	144	NO	1	1.02069	0.860081	1.01822	1.13649	1.69775	13.1114	0.9592	0.974795	1.69784	1.06538	2.96489	0.469503	1.06512
OSBPL2	Oxysterol-binding protein-related protein 2	Q9H1P3	CVGLELSK	83	NO	1	0.980363	0.662183	0.832423	1.33959	1.96155	10.6567	0.9319	0.868736	1.96161	1.07609	2.59889	0.427833	0.725057
OSBPL8	Oxysterol-binding protein-related protein 8	Q9BZF1	DGFCLSGSILAK	528	NO	1	1.21497	1.23108	1.89143	1.83022	2.39282	4.91509	0.9215	0.987849	2.81783	1.08025	2.12702	0.837968	1.6767
MVK	Mevalonate kinase	Q03426	RSPALQILLTNTKVPR	226	NO	1	0.729941	1.96001	2.54291	2.68435	2.89871	0.0911447	0.9759	0.864887	2.70869	0.983876	1.34985	1.08064	2.18385
PDS5A	Sister chromatid cohesion protein PDS5 homolog A	Q29RF7	IAYPPGVK	23	NO	1	1.90362	1.91724	2.02904	2.01783	2.43165	0.349325	0.9525	0.999234	3.01788	1.08377	3.1997	0.751643	1.99734
CUL1	Cullin-1	Q13616	QIGLDQIWDDLR	14	NO	1	1.48447	1.07084	1.32504	1.36991	2.65088	15.3355	0.916	1.22009	2.65106	1.0858	2.28744	0.498945	0.875002
PRKDC	DNA-dependent protein kinase catalytic subunit	P78527	LCYDAFTENMAGENQLLERR	1918	NO	1	1.09722	0.96001	1.35418	1.39934	2.3266	74.2118	0.9488	1.05241	3.32419	1.08878	5.03327	0.244761	0.662613
DDX1	ATP-dependent RNA helicase DDX1	Q92499	ELAEQTLNNIK	297	NO	1	1.0762	1.12974	1.23259	1.46139	2.13599	26.135	0.9838	1.07082	2.47839	1.09483	5.52366	0.431238	2.75971
TTC39A	Tetratricopeptide repeat protein 39A	Q5SRH9	IQAATLQAK	589	NO	1	1.03961	1.02059	1.1176	1.2729	1.94468	19.8686	0.9895	1.04033	2.01048	1.09988	4.36946	0.290391	0.590488
NUP98	Nuclear pore complex protein Nup98-Nup96	P52948	RISEACSLAQQSGDHR	1342	NO	1	1.49326	2.02452	2.78354	2.36268	2.67068	0.0354862	0.9399	1.01989	2.61819	1.07254	2.14984	1.10123	2.48835
DDX1	ATP-dependent RNA helicase DDX1	Q92499	TGAFSIPVIQIVYETLKDQQEGKK	53	NO	1	1.34558	1.13686	1.23846	1.31498	2.44411	13.8744	0.9519	1.18024	2.44412	1.10574	3.89213	0.378074	1.22508
PRKDC	DNA-dependent protein kinase catalytic subunit	P78527	DLCNTHLMR	1362	NO	1	1.09867	1.11546	1.15217	1.31045	1.67083	14.2528	0.9647	1.07153	1.74363	1.10947	2.64946	0.730416	1.68414
G6PD	Glucose-6-phosphate 1-dehydrogenase	P11413	LSNHISSLFREDQIYR	183	NO	1	1.17622	1.01473	1.28435	1.90637	2.26465	4.82556	0.9842	1.05863	2.31787	1.11502	2.61416	0.88985	1.97506
EML4	Echinoderm microtubule-associated protein-like 4	Q9HC35	VIAVADDFCK	803	NO	1	1.12419	1.14919	1.33473	1.88498	2.19881	4.44136	0.9932	1.06225	2.30331	1.11568	5.07473	0.835055	4.37016
OSBPL2	Oxysterol-binding protein-related protein 2	Q9H1P3	ASCQPQPLER	120	NO	1	0.843174	0.998372	1.20282	1.6429	2.21135	14.7808	0.9882	0.923561	2.59149	1.13993	6.33951	0.571375	3.15489
PRKDC	DNA-dependent protein kinase catalytic subunit	P78527	LNESTFDTQITKK	1858	NO	1	0.887615	1.28551	1.18868	1.3992	2.25553	46.131	0.9272	1.06226	2.85746	1.15322	4.09931	0.373474	1.15437
ACTN4	Alpha-actinin-4	O43707	TINEVENQILTR	746	NO	1	0.868348	0.817547	0.803332	0.911494	2.35699	31.181	0.9869	0.872331	2.39272	1.15485	2.96651	-0.167165	0.206686
PFKM	ATP-dependent 6-phosphofructokinase	P08237	LLAHVRPPVSK	387	NO	1	1.18251	2.16805	1.96965	2.79938	2.82797	0.227044	0.9008	0.959554	2.99873	1.15931	2.321	0.578378	0.339402
DDX1	ATP-dependent RNA helicase DDX1	Q92499	LDDLVSTGKLNLSQVR	350	NO	1	0.823937	0.669463	0.729873	0.882256	2.19576	19.4017	0.962	0.80582	2.19697	1.16663	5.16334	-0.0293111	0.0667749
DDX1	ATP-dependent RNA helicase DDX1	Q92499	RLQVIVCSATLHSFDVK	400	NO	1	1.15417	1.11629	1.36773	1.54758	2.44909	27.6576	0.9672	1.10804	2.88203	1.17098	3.87013	0.454652	1.22226
OSBP	Oxysterol-binding protein 1	P22059	LWIDQSGEIDIVNHK	590	NO	1	0.972515	1.11434	1.11255	1.70514	2.58902	17.8588	0.9951	1.01841	2.89319	1.17567	4.24137	0.486178	1.19134
IFIH1	Interferon-induced helicase C domain-containing protein 1	Q9BYX4	VLLVEQLFRK	366	NO	1	1.26534	1.59169	1.59051	1.66146	2.19184	4.75037	0.9024	0.997494	2.57289	1.17589	2.79888	0.763269	1.61783
IRAK4	Interleukin-1 receptor-associated kinase 4	Q9NWZ3	IAQGAANGINFLHENHHIHR	291	NO	1	0.994852	2.27022	2.17076	1.99694	1.79485	0.0233138	0.9197	0.992197	2.05826	1.1789	2.43118	0.807427	1.3564
GPATCH8	G patch domain-containing protein 8	Q9UKJ3	KPSVSEEVQATPNK	1105	NO	1	1.02526	1.83429	2.56161	2.24618	2.29288	0.0886788	0.9742	1.01242	2.36693	0.91628	1.40127	1.18006	2.10685
UTRN	Utrophin	P46939	TSWINLK	2422	NO	1	1.14524	1.06136	1.27022	1.68338	1.72547	1.68026	0.9784	1.06626	1.72452	0.746925	0.744676	1.18261	2.04953
OSBP	Oxysterol-binding protein 1	P22059	ATEDGTPYDPYK	757	NO	1	0.859695	1.00463	1.14227	1.21904	2.08614	29.3111	0.9625	0.992143	2.29693	1.18776	6.87824	0.40121	3.04593
RTF2	Replication termination factor 2	Q9BY42	SKEESAHWVTHTSYCF	291	NO	1	1.64588	1.56755	2.4162	3.26631	2.85375	0.506584	0.916	1.29364	3.07791	1.19798	2.10341	1.10721	1.236
CLINT1	Clathrin interactor 1	Q14677	SLENYHFVDEHGKDQGINIR	110	NO	1	1.0928	0.97892	0.924785	1.86232	1.94116	6.00444	0.9866	0.99908	1.94153	1.20052	3.46085	0.667136	0.908199
OSBP	Oxysterol-binding protein 1	P22059	LTEDLEYHELLDR	450	NO	1	0.93201	1.00745	0.907124	1.09727	2.00649	19.5816	0.9916	0.961678	2.01655	1.20092	5.15353	0.372941	1.31341
UTRN	Utrophin	P46939	QLGLLLHDAIQIPR	2990	NO	1	1.5039	2.07899	1.83575	2.27775	2.52497	0.804918	0.9177	0.994389	3.05644	1.20319	3.33903	1.22109	2.72907
DDX1	ATP-dependent RNA helicase DDX1	Q92499	MHNQIPQVTSDGK	387	NO	1	1.19354	1.01246	1.06069	1.28685	2.33259	21.6962	0.982	1.0662	2.38578	1.20838	4.16962	0.320164	0.872766
PIK3R4	Phosphoinositide 3-kinase regulatory subunit 4	Q99570	ISTRPFLNNIEKR	114	NO	1	1.17388	2.88582	2.88725	2.84249	2.85285	0.013887	0.9996	0.999938	2.8671	1.21416	2.10157	1.22066	2.17802
PRKDC	DNA-dependent protein kinase catalytic subunit	P78527	VLEQLIVAHFPMQSR	1713	NO	1	0.798135	1.08095	1.26469	1.64456	1.9293	3.60788	0.9651	0.912903	2.04864	1.22131	2.85827	0.80939	1.83878
ASS1	Argininosuccinate synthase	P00966	QHGIPIPVTPK	166	NO	1	1.34644	1.08191	1.0265	1.54255	2.46151	12.5628	0.9511	1.11368	2.46283	1.23073	3.14588	0.0110452	0.00827642
BCOR	BCL-6 corepressor	Q6W2J9	SSVETTPSVIQHVGQPPATPAK	586	NO	1	0.852925	1.15196	1.56639	1.55202	2.08006	7.0189	0.9062	0.916168	2.40815	1.23481	2.54429	0.57255	0.664097
MCCC1	Methylcrotonoyl-CoA carboxylase subunit alpha	Q96RQ3	HNFCFMEMNTR	329	NO	1	0.663147	1.04583	0.885881	1.26928	2.11286	12.9919	0.9316	0.898656	2.11494	1.25044	2.93815	0.673938	1.43212
DDX1	ATP-dependent RNA helicase DDX1	Q92499	GIDIHGVPYVINVTLPDEKQNYVHR	578	NO	1	1.19391	1.9298	2.40282	2.43665	2.4553	0.058373	0.9998	1.00256	2.45406	1.1695	1.51947	1.26866	2.00661
GPI	Glucose-6-phosphate isomerase	P06744	SNTPILVDGK	107	NO	1	1.43505	1.29106	0.81752	1.15918	2.86011	28.4508	0.9135	1.13569	2.8705	1.28116	2.29302	-0.274137	0.227312
ACTN4	Alpha-actinin-4	O43707	TIPWLEDRVPQK	312	NO	1	0.826044	0.702391	1.09552	0.873415	3.07524	45.1622	0.9769	0.899467	3.08009	1.28543	3.21856	-0.104392	0.116715
AHCYL2	Adenosylhomocysteinase 3	Q96HN2	IVLLAEGR	515	NO	1	1.28025	1.40569	1.48082	1.66429	2.52118	17.5029	0.9114	1.19647	2.82346	1.29464	5.26288	0.719675	2.82145
NAT1	Arylamine N-acetyltransferase 1	P18440	NKLDLETLTDILQHQIR	17	NO	1	1.1494	1.69256	1.7129	2.21434	2.41552	0.971688	0.9585	0.980524	2.69453	1.2983	2.21581	0.704572	0.94042
PRKDC	DNA-dependent protein kinase catalytic subunit	P78527	MVSAVLNGMLDQSFRER	1592	NO	1	0.974285	1.42383	1.24107	1.58441	2.4542	42.9995	0.921	1.11012	3.15915	1.3118	3.4634	0.689084	1.87364
OSBP	Oxysterol-binding protein 1	P22059	ELSKIPMPVNFNEPLSMLQR	430	NO	1	0.807301	1.05734	1.12864	1.30692	2.14691	13.0788	0.9491	0.998277	2.14746	1.32136	4.71368	0.508946	1.9858
OSBP	Oxysterol-binding protein 1	P22059	TSKPFNPLLGETFELDRLEENGYR	491	NO	1	1.03814	1.07075	1.31261	1.38084	2.66127	14.6316	0.9701	1.10533	2.6619	1.32883	8.31561	0.387992	3.49516
CDC5L	Cell division cycle 5-like protein	Q99459	EMITMLHYDLLHHPYEPSGNKK	578	NO	1	0.766345	3.74826	2.73451	3.37736	2.95869	0.028552	0.9189	0.882787	3.20472	0.966274	1.1266	1.33245	2.27531
UQCRC1	Cytochrome b-c1 complex subunit 1	P31930	IAEVDASVVR	433	NO	1	0.95489	1.05169	1.19113	1.28495	2.74052	37.8038	0.9875	1.04352	3.13985	1.33805	6.15112	0.335495	1.42653
PRKDC	DNA-dependent protein kinase catalytic subunit	P78527	LLALNSLYSPK	2539	NO	1	1.0256	1.31062	1.406	1.54536	2.03475	23.2258	0.9518	0.995657	2.56425	1.33926	3.46396	0.136543	0.0696265
DDX1	ATP-dependent RNA helicase DDX1	Q92499	IMHFPTWVDLK	422	NO	1	0.580274	0.983771	1.15423	1.32397	2.74142	40.3291	0.942	0.897817	3.4626	1.34634	3.60991	0.571375	1.87783
PRKDC	DNA-dependent protein kinase catalytic subunit	P78527	KAALSALESFLK	310	NO	1	1.4658	1.37434	1.57959	1.42826	3.13746	15.2237	0.9324	1.3547	3.13742	1.34837	2.10444	0.497537	0.556172
NAA35	N-alpha-acetyltransferase 35	Q5VZE5	FAPFNSVMTPPPVHYLQFK	620	NO	1	1.11612	0.779083	0.927887	1.14123	1.88414	18.9662	0.9203	0.955622	1.90734	1.35415	2.35436	0.665379	0.801139
ACTN1	Alpha-actinin-1	P12814	LAILGIHNEVSK	566	NO	1	1.16249	0.840983	0.811033	1.41118	2.8498	13.9092	0.9734	0.953589	2.85215	1.36848	2.43861	-0.193818	0.15542
OSBP	Oxysterol-binding protein 1	P22059	SLCEQVSHHPPAAAHHAESK	515	NO	1	1.04395	1.01519	1.27999	1.45466	2.41618	47.0141	0.9808	1.04181	3.15216	1.37457	6.84755	0.573534	3.14248
UBE4A	Ubiquitin conjugation factor E4 A	Q14139	INKPGNMIMAFSNLAER	954	NO	1	0.626757	1.13947	0.987257	1.77171	2.49499	9.66988	0.9399	0.910718	2.59323	1.3861	2.15312	0.75939	0.832686
NLRP2	NACHT	Q9NX02	SSLLCLDLGLNHIGVK	925	NO	1	1.06593	1.18635	0.916558	1.37418	2.68039	14.8137	0.9822	1.04221	2.68248	1.39638	2.79767	0.416835	0.702704
GPI	Glucose-6-phosphate isomerase	P06744	AVLHVALR	97	NO	1	0.834521	1.14013	1.15909	1.19254	2.78563	20.6062	0.9734	1.03332	2.79693	1.39824	6.49584	0.204008	0.741809
LTN1	E3 ubiquitin-protein ligase listerin	O94822	VVTCSLLALKR	224	NO	1	0.816034	0.589101	0.647028	1.30075	2.22215	11.0857	0.9447	0.763004	2.22207	1.40003	3.43079	0.663354	1.51739
PRKDC	DNA-dependent protein kinase catalytic subunit	P78527	RYNFPVEVEVPMER	1987	NO	1	1.23236	1.31168	1.52449	1.77557	2.6892	18.9732	0.9561	1.13289	3.16787	1.40267	3.78429	0.617931	1.48524
OSBP	Oxysterol-binding protein 1	P22059	ATEDGTPYDPYKALWFER	757	NO	1	1.21522	1.09079	1.25668	1.7643	2.99617	34.1275	0.9912	1.10257	3.73942	1.42937	6.26409	0.703155	4.09129
ACTN4	Alpha-actinin-4	O43707	QLEAIDQLHLEYAKR	522	NO	1	0.913828	0.9206	0.510893	1.13894	3.72333	15.9534	0.9788	0.836296	3.72394	1.42938	2.28637	-0.375319	0.343504
PDIA3	Protein disulfide-isomerase A3	P30101	KFIQENIFGICPHMTEDNKDLIQGK	234	NO	1	0.785679	2.10407	2.81569	3.08544	2.73361	0.0898446	0.9812	0.892752	2.87829	1.17542	2.23712	1.43075	3.08025
OSBP	Oxysterol-binding protein 1	P22059	FVPYSYFSR	613	NO	1	1.1585	1.12799	1.28979	1.55137	2.76289	13.7153	0.9802	1.14393	2.76452	1.44358	7.08043	0.57822	3.98792
OSBP	Oxysterol-binding protein 1	P22059	KVTGEVTDPSGK	626	NO	1	0.8298	0.786224	1.10518	1.19239	2.31151	58.4592	0.9639	0.912289	3.11767	1.44728	4.43952	0.358513	1.01705
OSBP	Oxysterol-binding protein 1	P22059	IPYKPNYSLNLWSIMK	409	NO	1	0.891439	0.851697	0.863228	1.29539	2.68186	13.1723	0.9946	0.901589	2.68203	1.47364	5.50244	0.575103	1.59947
ACTN1	Alpha-actinin-1	P12814	GISQEQMNEFR	742	NO	1	1.3913	1.75983	1.60442	2.09607	2.33972	2.80749	0.9325	1.0001	2.86827	1.4763	3.79965	1.016	1.98482
UQCRC1	Cytochrome b-c1 complex subunit 1	P31930	SGMFWLRF	473	NO	1	0.892006	0.872611	1.06394	1.60767	2.94138	37.2242	0.9963	0.922648	3.79053	1.47929	5.48513	0.525607	1.43777
AK2	Adenylate kinase 2	P54819	KEKLDSVIEFSIPDSLLIR	119	NO	1	1.26222	1.76071	2.8961	2.81834	3.63418	0.323016	0.9516	0.962575	3.5367	1.49729	2.65453	0.837037	0.875773
NLRP2	NACHT	Q9NX02	DLAAVLVVSR	859	NO	1	1.02151	0.719047	1.0518	0.846969	2.69118	41.6342	0.9702	0.927809	2.69978	1.50117	2.90454	0.218229	0.272915
UQCRC1	Cytochrome b-c1 complex subunit 1	P31930	LCTSATESEVAR	379	NO	1	0.967421	1.00696	1.07867	1.32429	2.711	29.8971	0.9978	1.00852	2.99006	1.50888	7.60984	0.504317	2.85195
VARS1	Valine--tRNA ligase	P26640	EVYLHAIVR	848	NO	1	1.12862	1.6851	2.83733	3.484	3.03725	0.228722	0.9786	1.02877	3.26056	1.51709	2.48897	1.18586	1.58437
OSBP	Oxysterol-binding protein 1	P22059	TRIPYKPNYSLNLWSIMK	407	NO	1	0.960837	1.12097	1.2154	1.83126	3.35708	48.9672	0.9976	1.01717	4.69826	1.53816	5.19023	0.746611	3.52436
RMC1	Regulator of MON1-CCZ1 complex	Q96DM3	LMDFLLQR	376	NO	1	1.08158	2.49443	3.28853	3.45888	3.01956	0.0702023	0.9834	1.01234	3.26013	1.05698	1.41839	1.5473	3.931
NUP188	Nucleoporin NUP188	Q5SRE5	GAPSSPATGVLPSPQGK	1705	NO	1	0.81076	1.85079	2.13199	2.515	2.2461	0.0830826	0.9608	0.905263	2.29775	0.837959	0.567478	1.56402	2.76053
OSBP	Oxysterol-binding protein 1	P22059	LMENGRWDEANAEK	723	NO	1	1.0686	1.06629	1.54652	1.83639	3.4451	68.0938	0.9801	1.0663	5.23334	1.57406	4.89588	0.749477	3.01703
OSBP2	Oxysterol-binding protein 2	Q969R2	IPMPVNFNEPLSMLQR	538	NO	1	0.808727	1.20199	1.24746	1.47744	2.67875	73.9928	0.9582	1.01477	3.97838	1.59787	5.7093	0.778099	3.01778
PRKDC	DNA-dependent protein kinase catalytic subunit	P78527	IRVVQMLGSLGGQINK	853	NO	1	1.08899	1.21944	1.78707	1.80458	2.19575	0.73492	0.9508	0.97781	2.20934	1.60232	2.68674	1.35999	2.17993
ACTN4	Alpha-actinin-4	O43707	ICDQWDALGSLTHSRR	498	NO	1	0.973832	1.22336	1.20663	1.63026	4.14982	65.2324	0.9942	1.08306	6.06678	1.60788	2.88891	0.399361	0.745751
PRKDC	DNA-dependent protein kinase catalytic subunit	P78527	LVINTEEVFRPYAK	2149	NO	1	1.02297	1.21564	1.94333	1.89829	3.51863	66.8038	0.9296	1.04089	5.34784	1.61738	3.30359	0.600044	0.834049
MIA3	Transport and Golgi organization protein 1 homolog	Q5JRA6	VLDKVFR	974	NO	1	1.37389	3.64938	3.49909	4.02425	3.23947	0.0151033	0.9605	0.999928	3.60322	1.50013	2.84998	1.62462	3.1418
OSBPL2	Oxysterol-binding protein-related protein 2	Q9H1P3	ITMPIAFNEPLSFLQR	91	NO	1	1.02465	1.28604	1.18759	2.01693	3.14793	15.6614	0.9866	1.08638	3.46746	1.65072	5.05288	0.882379	3.21616
CDC42BPB	Serine/threonine-protein kinase MRCK beta	Q9Y5S2	DIKPDNVLLDVNGHIR	200	NO	1	1.09043	1.21284	1.43562	1.47135	4.28982	27.0106	0.9866	1.18301	4.4372	1.78135	3.78925	0.520228	0.673545
OSBP2	Oxysterol-binding protein 2	Q969R2	DFLELAEIHSR	373	NO	1	1.57968	1.96312	3.20688	3.75578	5.56445	29.3315	0.9835	1.00349	8.4392	1.88739	2.26926	1.39395	1.69084
PKM	Pyruvate kinase PKM	P14618	YRPRAPIIAVTRNPQTAR	444	NO	1	1.43783	2.02097	1.83463	2.97347	3.76466	20.4959	0.9505	1.0808	5.27466	1.88984	2.68012	0.907565	0.798256
FRMD4A	FERM domain-containing protein 4A	Q9P2Q2	QRLEELK	404	NO	1	1.21892	1.07768	1.03938	4.11012	5.51857	8.48166	0.9986	1.08394	5.51862	1.93468	3.04421	1.44435	1.99741
CLYBL	Citramalyl-CoA lyase	Q8N0X4	VESPEEIQWFADK	138	NO	1	1.36504	2.74507	3.17316	3.98941	4.76985	0.617509	0.974	0.927921	5.22969	1.80376	2.94341	1.94002	3.54076
GPI	Glucose-6-phosphate isomerase	P06744	KIEPELDGSAQVTSHDASTNGLINFIK	524	NO	1	0.826792	1.20967	1.17326	0.754084	3.31588	57.9143	0.9648	0.992729	3.43371	1.9766	4.93924	-0.0133865	0.0129974
OSBP	Oxysterol-binding protein 1	P22059	ELTHIYRGEYWECK	782	NO	1	1.07634	1.07584	1.96812	2.0528	4.74568	123.566	0.9597	1.1336	8.80621	1.99337	5.64875	1.03672	3.63179
OSBPL2	Oxysterol-binding protein-related protein 2	Q9H1P3	ITEYMEHVYLIHR	107	NO	1	1.12808	1.29786	1.30841	2.21357	4.39755	50.1801	0.9958	1.11862	6.27153	2.00085	6.56739	0.946499	3.07402
ACTN4	Alpha-actinin-4	O43707	ISIEMNGTLEDQLSHLK	675	NO	1	1.0569	1.42664	1.1964	1.52998	5.08007	26.3971	0.9913	1.1695	5.23988	2.05873	3.18509	0.0627936	0.0397193
OSBP	Oxysterol-binding protein 1	P22059	KVTTTVHNIIVGK	577	NO	1	1.26964	0.982574	1.35736	1.81614	3.27236	59.393	0.9815	1.09503	4.73402	2.07564	4.39876	1.10055	2.50858
ACTN4	Alpha-actinin-4	O43707	EAILAIHK	585	NO	1	0.939843	1.10191	1.39271	1.44704	3.05321	16.724	0.9616	1.10816	3.06154	2.2679	2.92965	0.651228	0.481654
OSBPL2	Oxysterol-binding protein-related protein 2	Q9H1P3	LFMIYGK	295	NO	1	1.44829	1.39856	1.42208	3.09803	5.19779	12.2945	0.9909	1.27447	5.46758	2.28519	4.07409	1.11926	1.62633
GPI	Glucose-6-phosphate isomerase	P06744	MIPCDFLIPVQTQHPIRK	401	NO	1	1.54487	1.07963	1.28713	1.26162	8.81323	31.0476	0.9963	1.2276	8.84329	2.55591	3.77399	0.278228	0.299859
ARMC6	Armadillo repeat-containing protein 6	Q6NXE6	AGVLPLLTGAITHHGHHTDVVR	219	NO	1	0.777512	14.7231	16.2335	14.254	13.875	0.0368907	0.9876	0.878296	14.796	2.99022	3.13023	3.29526	3.58189

## Sheet: B E2-responsive segments
Gene names	Protein names	Uniprot entry	Sequence	Sequence start position	IsStabilized	Ratio_E2 treatment vs Vehicle						EC50 (uM)	R2	lower	upper	Bayes T-test
						0nM vs. 0nM	20nM vs. 0nM	200nM vs. 0nM	2uM vs. 0nM	20uM vs. 0nM	100uM vs. 0nM					Log2FC	-Log10P.Value
AAR2	Protein AAR2 homolog	Q9Y312	AAVQMDPELAKR	2	YES	1	0.882042	0.938901	0.808163	0.573777	0.503524	2.23785	0.9661	0.493628	0.946896	-0.618002	6.71764
ACAD9	Complex I assembly factor ACAD9	Q9H845	FFTEEVDSR	77	YES	1	0.987768	0.91436	0.855087	0.795248	0.649488	31.4367	0.9823	0.426927	1.00403	-0.502145	3.18374
ACOT1	Acyl-coenzyme A thioesterase 1	Q86TX2	SFIPVER	307	YES	1	1.02191	1.02003	0.998999	0.939802	0.541073	96.2268	0.998	0.089216	1.01228	-0.973012	8.83296
CAMK2B	Calcium/calmodulin-dependent protein kinase type II subunit beta	Q13554	DLKPENLLLASK	136	YES	1	0.988928	0.988907	1.05654	0.94828	0.481154	17.049	0.9862	0.480487	1.00858	-0.790435	6.36056
CAMK2G	Calcium/calmodulin-dependent protein kinase type II subunit gamma	Q13555	ITADQALKHPWVCQR	261	YES	1	1.06233	1.07581	1.00908	0.964038	0.584083	16.8421	0.9745	0.582672	1.0367	-0.97053	3.68955
CDK2	Cyclin-dependent kinase 2	P24941	AALAHPFFQDVTKPVPHLRL	279	YES	1	1.20242	0.776261	0.798976	0.60803	0.460149	1.20712	0.9419	0.347171	1.12892	-1.68779	4.37357
CES2	Cocaine esterase	O00748	IQELEEPEER	546	YES	1	0.969751	0.913016	0.808887	0.697174	0.57565	5.09343	0.9988	0.453003	1.00327	-0.638391	5.40099
CLUH	Clustered mitochondria protein homolog	O75153	VVEEPYTVR	118	YES	1	1.01333	1.00492	0.98442	0.870372	0.596944	36.7564	0.9993	0.430097	1.00695	-0.642374	6.00162
DECR1	2,4-dienoyl-CoA reductase [(3E)-enoyl-CoA-producing], mitochondrial	Q16698	VTKEQWDTIEELIR	317	YES	1	1.01656	1.05393	0.975574	0.810098	0.432211	31.1824	0.9939	0.156491	1.03153	-1.68219	6.26051
DOHH	Deoxyhypusine hydroxylase	Q9BU89	EALLDESRPLFER	163	YES	1	0.988466	0.986623	0.873736	0.666285	0.586021	2.56732	0.9993	0.574607	0.997836	-0.51624	4.07693
ECHS1	Enoyl-CoA hydratase	P30084	LFYSTFATDDRK	262	YES	1	0.996983	1.01146	0.976102	0.933975	0.556206	105.827	0.9971	0.0867002	0.998405	-0.858988	8.81097
FARSA	Phenylalanine--tRNA ligase alpha subunit	Q9Y285	DQHDTFFLRDPAEALQLPMDYVQR	272	YES	1	1.04729	1.02972	0.978358	0.861756	0.501018	82.7805	0.9932	0.0469082	1.02517	-0.586362	6.41776
FARSB	Phenylalanine--tRNA ligase beta subunit	Q9NSD9	DLLFQALGR	9	YES	1	1.05887	0.994527	0.904231	0.812904	0.547795	105.1	0.9776	0.0672339	1.02606	-0.780801	6.19883
GPX4	Phospholipid hydroperoxide glutathione peroxidase GPX4	P36969	ILAFPCNQFGK	97	YES	1	1.06448	1.10955	0.735209	0.360776	0.173665	2.04485	0.9811	0.175256	1.06564	-2.5454	6.70187
HADHA	Trifunctional enzyme subunit alpha	P40939	TLQEVTQLSQEAQR	112	YES	1	1.0123	1.01667	0.981185	0.925049	0.580311	117.894	0.997	0.0842901	1.00652	-0.786158	7.68664
HADHB	Trifunctional enzyme subunit beta	P55084	VGLPPLEK	409	YES	1	0.999038	1.04744	0.971731	0.960866	0.693768	106.721	0.9662	0.359457	1.00719	-0.540466	5.0077
HMGB1	High mobility group protein B1	P09429	HPDASVNFSEFSKKCSER	31	YES	1	0.937818	0.90065	0.90927	0.588674	0.565085	2.83646	0.972	0.564314	0.946526	-0.629538	3.37502
HSPA4L	Heat shock 70 kDa protein 4L	O95757	CTPACISLGSR	34	YES	1	1.02447	1.03571	0.957259	1.02949	0.749128	36.6721	0.9316	0.747745	1.00944	-0.345869	3.27359
MCM4	DNA replication licensing factor MCM4	P33991	AGIICQLNAR	601	YES	1	0.99303	0.989493	0.974623	0.911002	0.64517	75.4366	0.9989	0.376571	0.993176	-0.514309	5.76323
MCM6	DNA replication licensing factor MCM6	Q14566	TSILAAANPISGHYDR	497	YES	1	1.01964	1.00507	0.987418	0.928069	0.598735	91.3408	0.9976	0.226344	1.0062	-0.685961	7.92679
MTA1	Metastasis-associated protein MTA1	Q13330	AGVVNGTGAPGQSPGAGR	374	YES	1	0.950589	0.855521	0.765071	0.743712	0.359905	95.6358	0.9354	-0.167562	0.965351	-2.00116	3.7223
MVK	Mevalonate kinase	Q03426	MIHGNPSGVDNAVSTWGGALR	195	YES	1	1.11476	1.04329	0.971246	0.872667	0.450979	130.815	0.9309	0.644327	1.04479	-0.820692	3.54649
OSBPL10	Oxysterol-binding protein-related protein 10	Q9BXB5	LLEHGEEYVFTLPSAYAR	580	YES	1	1.05155	0.956483	0.93862	0.849901	0.439983	124.662	0.9793	-0.212412	1.00077	-0.898531	6.24156
P4HB	Protein disulfide-isomerase	P07237	ITEFCHR	339	YES	1	0.980232	0.939889	0.870478	0.632612	0.670518	1.17006	0.9796	0.651561	0.973375	-0.652434	3.07454
PDCD2L	Programmed cell death protein 2-like	Q9BRP1	AAVLKPVLLGLR	2	YES	1	0.938832	0.96037	0.926116	0.821746	0.414641	46.7838	0.9903	0.15429	0.962893	-1.31056	5.3682
PIP4K2C	Phosphatidylinositol 5-phosphate 4-kinase type-2 gamma	Q8TBX8	FLISYDR	141	YES	1	0.939209	0.922493	0.943233	0.854243	0.610728	22.4595	0.9364	0.546644	0.937075	-0.711456	3.03852
PKM	Pyruvate kinase PKM	P14618	NICKVVEVGSK	163	YES	1	1.13801	1.097	0.944598	0.713043	0.667621	1.71846	0.9451	0.672595	1.07992	-0.767087	3.5407
PTGR1	Prostaglandin reductase 1	Q14914	TGPLPPGPPPEIVIYQELR	248	YES	1	1.00567	1.03139	0.979084	0.71363	0.333011	13.9021	0.9983	0.26956	1.01216	-1.48096	3.68864
RBP1	Retinol-binding protein 1	P09455	PVDFTGYWK	2	YES	1	0.960586	0.902312	0.84537	0.812945	0.35012	14.2939	0.951	0.349848	0.927086	-1.7925	5.81081
RTF2	Replication termination factor 2	Q9BY42	FCFLRCCGCVFSER	134	YES	1	1.14929	0.774718	0.51702	0.539306	0.347699	0.100643	0.9308	0.467954	1.07467	-1.32675	4.36658
SCP2	Sterol carrier protein 2	P22307	LQNLQLQPGNAKL	535	YES	1	1.01964	1.02606	0.967775	0.925208	0.657502	130.396	0.9871	0.225926	1.01023	-0.535299	6.28149
SDR39U1	Epimerase family protein SDR39U1	Q9NRG7	GHEVTLVSR	24	YES	1	0.980214	0.950885	0.969227	0.912023	0.392301	18.8682	0.9954	0.390038	0.975092	-1.13923	5.7006
SEPHS2	Selenide	Q99611	VIEVLPR	422	YES	1	0.914473	0.895643	0.827749	0.728022	0.55551	32.46	0.9854	0.288143	0.983938	-0.700877	4.1031
SERPINH1	Serpin H1	P50454	DTQSGSLLFIGR	394	YES	1	0.994389	1.00931	1.01577	0.838666	0.496971	11.6984	0.9987	0.496944	1.00487	-1.03186	8.31988
SPR	Sepiapterin reductase	P35270	LLLINNAGSLGDVSK	95	YES	1	0.941652	0.95511	0.912367	0.843951	0.669549	39.861	0.9724	0.503903	0.97059	-0.425965	3.62605
SULT2B1	Sulfotransferase 2B1	O00204	ICGFLGRPLGK	224	YES	1	1.00346	0.994609	0.977375	0.961	0.588389	27.5816	0.997	0.570631	0.993946	-0.492702	4.2627
TRMT10C	tRNA methyltransferase 10 homolog C	Q7L0Y3	SSVQEECVSTISSSKDEDPLAATR	72	YES	1	0.993558	1.00932	0.951773	0.804435	0.580816	19.0736	0.9979	0.469307	1.00258	-0.688333	4.78832
YARS1	Tyrosine--tRNA ligase	P54577	EYTLDVYR	128	YES	1	1.0064	0.992056	0.97725	0.937189	0.591562	66.6332	0.9973	0.343672	0.995589	-0.507705	5.02836
ACACA	Acetyl-CoA carboxylase 1	Q13085	IGLAEEIR	1724	NO	1	1.04528	1.05813	1.12636	1.206	1.49488	1.03541	1.56597	-0.830308	0.963	0.402631	4.77376
ACSF2	Medium-chain acyl-CoA ligase ACSF2	Q96CM8	LNTPGELCIR	455	NO	1	0.964754	1.04954	1.23464	1.51291	1.48534	0.995238	1.50983	-1.31804	0.9883	0.387337	4.68165
ACTN1	Alpha-actinin-1	P12814	GISQEQMNEFR	742	NO	1	1.2769	1.3004	1.20773	1.75363	2.59476	1.19622	2.59503	-3.88328	0.9668	1.4763	3.79965
ACTN4	Alpha-actinin-4	O43707	LSNRPAFMPSEGK	366	NO	1	0.942183	0.987438	1.02601	1.12469	2.50624	0.953163	1.60014	-3.42016	0.9868	0.664873	5.12881
AHCYL2	Adenosylhomocysteinase 3	Q96HN2	IVLLAEGR	515	NO	1	1.08629	1.16364	1.33845	1.48276	1.9752	1.19647	2.82346	-0.667954	0.9114	1.29464	5.26288
ASS1	Argininosuccinate synthase	P00966	NQAPPGLYTK	200	NO	1	1.14316	1.05083	1.05716	1.29953	1.78967	1.06231	1.79963	-2.19915	0.9759	0.519228	3.12722
ATL3	Atlastin-3	Q6DD88	GLLEYFK	320	NO	1	1.06207	1.09005	1.09967	1.15886	1.64638	1.00714	1.55548	-3.72192	0.995	0.558749	4.50749
ATP2A3	Sarcoplasmic/endoplasmic reticulum calcium ATPase 3	Q93084	CLALATR	561	NO	1	0.996985	0.960282	1.01818	1.15051	1.41682	0.988231	1.47792	-1.12824	0.9917	0.419313	4.31389
ATP6V1A	V-type proton ATPase catalytic subunit A	P38606	LASFYER	382	NO	1	1.03359	1.03427	1.05631	1.1005	1.38156	1.03104	1.38157	-4.9867	0.9838	0.394916	3.97698
CDC42BPB	Serine/threonine-protein kinase MRCK beta	Q9Y5S2	LADFGSCLK	216	NO	1	1.04343	1.11325	1.23473	1.25891	2.79403	1.09764	2.81735	-2.8437	0.9867	0.383386	3.11901
CLTC	Clathrin heavy chain 1	Q00610	QLPLVKPYLR	1444	NO	1	0.986131	1.01041	1.03208	1.06169	1.37002	1.00716	1.37044	-3.69728	0.9895	0.435083	3.31244
CSE1L	Exportin-2	P55060	AADEEAFEDNSEEYIRR	356	NO	1	0.986851	0.996552	1.01273	1.02764	1.33178	0.999027	1.33318	-3.40612	0.9962	0.416798	5.92631
CTPS2	CTP synthase 2	Q9NRF8	KLYGDVPFIEER	466	NO	1	1.0025	1.09664	1.32238	1.53143	1.74227	0.982589	1.84657	-0.533493	0.9956	0.836455	3.64218
DDX1	ATP-dependent RNA helicase DDX1	Q92499	ELLIIGGVAAR	320	NO	1	1.01258	1.08832	1.16597	1.27569	2.04561	1.06658	2.04724	-3.32444	0.9775	0.815348	6.0793
DDX6	Probable ATP-dependent RNA helicase DDX6	P26196	IKTSDVTSTK	85	NO	1	1.07016	1.01706	1.09587	1.1603	1.42864	1.04236	1.47525	-1.94081	0.9756	0.463723	3.46581
EIF3E	Eukaryotic translation initiation factor 3 subunit E	P60228	NLYSDDIPHALR	60	NO	1	1.06263	1.06789	1.19572	1.29229	1.58687	1.01688	1.65603	-0.567479	0.9588	0.413678	4.99106
EIF4A1	Eukaryotic initiation factor 4A-I	P60842	GIYAYGFEKPSAIQQR	46	NO	1	0.957828	1.00708	1.04747	1.07405	1.59293	1.00309	1.59386	-3.67749	0.9858	0.698777	7.0469
EPRS1	Bifunctional glutamate/proline--tRNA ligase	P07814	QFIAAQGSSR	473	NO	1	1.02811	1.04375	1.05904	1.16043	1.42284	1.02918	1.4552	-1.37229	0.9875	0.692625	3.97125
EXOC4	Exocyst complex component 4	Q96A65	KMNLHLVLIDELHR	185	NO	1	1.0574	0.986227	1.42469	1.504	1.45	1.01435	1.74961	-6.3511	0.9013	0.898897	3.06729
G6PD	Glucose-6-phosphate 1-dehydrogenase	P11413	VQPNEAVYTK	394	NO	1	0.993889	1.01438	1.07041	1.27746	1.68349	1.00159	1.88025	-0.849355	0.999	0.600411	5.66495
GATB	Glutamyl-tRNA(Gln) amidotransferase subunit B	O75879	ETLPELPSVTR	371	NO	1	1.01632	1.05838	1.07863	1.17465	1.43195	1.02745	1.49739	-0.984661	0.9781	0.468988	4.99584
GCN1	Stalled ribosome sensor GCN1	Q92616	ALCDPLEEVR	2013	NO	1	1.00952	1.02359	1.04287	1.1238	1.34953	1.01128	1.25821	-3.66152	0.9369	0.412747	3.85181
GLUD1	Glutamate dehydrogenase 1	P00367	GASIVEDKLVEDLR	77	NO	1	1.04614	1.10773	1.11463	1.16181	1.77985	1.06704	1.78503	-2.95232	0.9788	0.659308	6.76155
GPI	Glucose-6-phosphate isomerase	P06744	AVLHVALR	97	NO	1	1.16031	1.18012	1.10925	1.09185	4.44371	1.10815	4.45437	-6.15367	0.9979	1.39824	6.49584
HDHD3	Haloacid dehalogenase-like hydrolase domain-containing protein 3	Q9BSH5	AHGLEVEPSALEQGFR	35	NO	1	1.04809	0.979569	1.01514	1.10575	1.55364	0.988508	1.65905	-2.4231	0.994	0.634141	4.1108
HK2	Hexokinase-2	P52789	NVELVEGEEGR	692	NO	1	1.07732	1.06217	1.05766	1.0971	1.40103	1.04923	1.40103	-4.85365	0.9664	0.426811	4.18509
HNRNPL	Heterogeneous nuclear ribonucleoprotein L	P14866	VFNVFCLYGNVEK	399	NO	1	0.948788	0.997822	1.12554	1.44104	1.40058	0.982185	1.42088	-3.6763	0.9893	0.556705	4.11426
HNRNPU	Heterogeneous nuclear ribonucleoprotein U	Q00839	RKMCLFAGFQR	591	NO	1	0.982346	0.937568	1.03076	1.23367	1.30609	0.973709	1.30936	-1.29437	0.9794	0.341541	3.02101
HSP90AA1	Heat shock protein HSP 90-alpha	P07900	ELISNSSDALDKIR	47	NO	1	0.920581	0.947112	1.01282	1.06895	1.33148	0.970039	1.33225	-3.0569	0.9486	0.387295	3.71224
HUWE1	E3 ubiquitin-protein ligase HUWE1	Q7Z6Z7	TDATTAIIK	675	NO	1	1.04401	1.07766	1.08941	1.13481	1.39403	1.01982	1.37543	-0.674427	0.9569	0.4164	3.69991
IARS1	Isoleucine--tRNA ligase	P41252	LYLINSPVVR	625	NO	1	1.04842	1.01673	1.01677	1.09339	1.32382	1.02046	1.32381	-4.86258	0.9836	0.387193	3.27183
ITCH	E3 ubiquitin-protein ligase Itchy homolog	Q96J02	SALDNGPQIAYVR	514	NO	1	1.04238	1.16241	1.12577	1.30607	1.5104	1.00596	1.29395	-3.1715	0.9803	0.42918	5.07268
KDM1A	Lysine-specific histone demethylase 1A	O60341	IADQFLGAMYTLPR	825	NO	1	0.960405	1.00452	1.03974	1.10791	1.42054	1.00113	1.42134	-3.18004	0.9781	0.357364	3.64033
KIF5B	Kinesin-1 heavy chain	P33176	ILQDSLGGNCR	285	NO	1	0.981849	0.99371	1.02672	1.09958	1.46771	1.00056	1.46789	-3.97688	0.9938	0.591334	5.38369
LONP1	Lon protease homolog	P36776	RAGVTCIVLPAENKK	904	NO	1	1.25758	1.40738	1.38785	1.45482	1.66864	0.997067	2.41558	-0.15532	0.9248	0.856139	3.07789
MACROH2A1	Core histone macro-H2A	O75367	AGVIFPVGR	19	NO	1	1.0345	1.01762	1.04	1.06627	1.32819	1.02305	1.32839	-4.01097	0.9871	0.452811	5.01187
MARS1	Methionine--tRNA ligase	P56192	LENDQIESLR	805	NO	1	1.03311	1.02883	1.05822	1.10664	1.49358	1.03642	1.56793	-4.20949	0.9855	0.628866	4.75701
MCCC1	Methylcrotonoyl-CoA carboxylase subunit alpha	Q96RQ3	IIEEAPAPGIK	285	NO	1	0.997361	1.0352	1.00022	1.14457	1.67293	1.00813	1.67708	-2.79664	0.9972	0.743695	6.45707
MCM5	DNA replication licensing factor MCM5	P33992	VTIMGIYSIK	263	NO	1	1.02071	1.07673	1.12083	1.26844	1.31678	0.976734	1.33354	-0.8131	0.9449	0.435389	3.09928
MVK	Mevalonate kinase	Q03426	MLSEVLLVSAPGK	1	NO	1	0.86928	1.28472	1.53257	1.71852	1.8637	0.968302	1.46293	-0.967623	0.9853	0.33102	3.00423
MYH9	Myosin-9	P35579	VISGVLQLGNIVFKK	342	NO	1	1.00785	1.06154	1.02598	1.11454	1.3205	1.02381	1.32053	-3.89877	0.9694	0.335604	3.84668
MYO1C	Unconventional myosin-Ic	O00159	IICDLVEEK	478	NO	1	1.0505	1.02638	1.21242	1.24955	1.43803	0.999123	1.50607	-0.474992	0.944	0.512229	3.27981
NLRP2	NACHT	Q9NX02	LLYTTLR	830	NO	1	0.958259	0.969495	1.01008	1.13713	2.18956	0.983701	2.30041	-1.91293	0.9985	0.492119	4.84953
NUP205	Nuclear pore complex protein Nup205	Q92621	IQQGALELLR	1566	NO	1	0.986465	1.01034	1.09789	1.06254	1.5794	1.02363	1.5794	-5.80582	0.9705	0.389895	4.3933
ORC3	Origin recognition complex subunit 3	Q9UBD5	LISQLMDCCVDIK	151	NO	1	0.884918	1.06782	1.02086	1.04178	1.61067	0.952692	1.64809	-3.30412	0.9043	0.660061	3.45328
OSBP	Oxysterol-binding protein 1	P22059	TSKPFNPLLGETFELDRLEENGYR	491	NO	1	1.00698	1.03043	1.24155	1.51819	2.76094	1.02717	4.24042	-0.760503	0.9935	1.32883	8.31561
OSBP2	Oxysterol-binding protein 2	Q969R2	IPMPVNFNEPLSMLQR	538	NO	1	1.1942	1.58255	2.22717	2.61661	4.1216	1.02298	6.11988	-0.373131	0.9777	1.59787	5.7093
OSBPL2	Oxysterol-binding protein-related protein 2	Q9H1P3	ASCQPQPLER	120	NO	1	1.09581	1.14595	1.17093	1.92512	3.12249	1.07323	3.43839	-1.06232	0.9971	1.13993	6.33951
OSBPL8	Oxysterol-binding protein-related protein 8	Q9BZF1	VVLPTFILEPR	423	NO	1	1.1307	1.12917	1.33349	1.33506	1.66077	1.00741	1.78383	-0.35879	0.9153	0.36403	3.11142
P4HB	Protein disulfide-isomerase	P07237	ALAPEYAK	58	NO	1	1.02672	1.03918	1.21491	1.47193	1.57726	1.00708	1.59717	-0.854293	0.9989	0.799401	6.90244
PDCD6	Programmed cell death protein 6	O75340	LSDQFHDILIR	126	NO	1	0.935337	1.00009	0.987213	1.11662	1.47001	0.980654	1.47017	-3.90748	0.9854	0.476166	3.56351
PDIA3	Protein disulfide-isomerase A3	P30101	KFIQENIFGICPHMTEDNKDLIQGK	234	NO	1	0.785679	2.10407	2.81569	3.08544	2.73361	0.892752	2.87829	-4.17885	0.9812	1.43075	3.08025
PDS5A	Sister chromatid cohesion protein PDS5 homolog A	Q29RF7	IAYPPGVK	23	NO	1	1.26679	1.29649	1.37613	1.48559	1.8603	1.01446	2.07529	-0.269621	0.9131	1.08377	3.1997
PKM	Pyruvate kinase PKM	P14618	ITLDNAYMEK	142	NO	1	1.14161	1.30212	1.28036	1.65389	1.9885	0.972051	1.52115	-0.470016	0.9668	0.509999	4.75988
PLEC	Plectin	Q15149	MVEGYQGLR	308	NO	1	1.15334	1.22265	1.26571	1.43577	1.63308	1.00666	1.77363	-0.316641	0.9648	0.426383	3.40914
PPP2R1A	Serine/threonine-protein phosphatase 2A 65 kDa regulatory subunit A alpha isoform	P30153	ELVSDANQHVK	332	NO	1	1.0297	1.04567	1.09199	1.11772	1.42314	0.990633	1.39306	-0.871013	0.987	0.533527	3.37955
PRKDC	DNA-dependent protein kinase catalytic subunit	P78527	GYGLFAGPCK	365	NO	1	1.02003	1.06216	1.13854	1.21494	1.7393	1.05482	1.743	-2.74258	0.9709	0.396109	4.09895
PRPF8	Pre-mRNA-processing-splicing factor 8	Q6P2Q9	ELGGLGMLSMGHVLIPQSDLR	1321	NO	1	1.09171	1.12145	1.27847	1.46252	1.45912	1.02606	1.49493	-0.66691	0.9795	0.568652	3.03603
PSMD5	26S proteasome non-ATPase regulatory subunit 5	Q16401	ALHSVLQAVPLNELR	24	NO	1	0.979166	1.03841	1.06124	1.12891	1.50959	1.0194	1.51636	-2.3975	0.9793	0.519657	5.31347
RARS1	Arginine--tRNA ligase	P54136	GFDILGIKPVQR	648	NO	1	1.07982	1.074	1.16468	1.2231	1.67621	1.07955	1.67659	-3.61991	0.9545	0.361632	3.21834
RARS2	Probable arginine--tRNA ligase	Q5T160	STIIGNFIANLK	147	NO	1	0.990912	1.02837	1.08279	1.12028	1.40127	1.02229	1.42749	-1.54767	0.9593	0.42347	3.61271
RELCH	RAB11-binding protein RELCH	Q9P260	LSEENIDSSAGNGVLTK	888	NO	1	0.962789	0.98856	1.03993	1.20737	1.37701	1.00348	1.34488	-3.10224	0.9897	0.472075	3.50961
RNF213	E3 ubiquitin-protein ligase RNF213	Q63HN8	LVESISLDENGTR	2601	NO	1	1.04016	1.02206	1.011	1.15364	1.52156	1.01828	1.52286	-3.03153	0.9957	0.306413	3.29048
RPS6KA3	Ribosomal protein S6 kinase alpha-3	P51812	LTAALVLR	668	NO	1	0.988691	0.973526	0.993143	1.05279	1.28856	0.988743	1.29313	-2.38961	0.9948	0.408012	4.25231
SET	Protein SET	Q01105	EFHLNESGDPSSK	155	NO	1	1.06141	1.03682	1.06605	1.07169	1.40404	1.04108	1.40407	-5.32368	0.975	0.406239	4.13442
SMAD2	Mothers against decapentaplegic homolog 2	Q15796	DEVCVNPYHYQR	158	NO	1	0.976134	1.02573	1.17042	1.29561	1.27383	0.984863	1.3102	-4.34143	0.974	0.462899	3.4052
STARD10	START domain-containing protein 10	Q9Y365	ESVQVPDDQDFR	20	NO	1	0.940623	0.97741	1.03855	1.07143	1.52615	0.989146	1.52701	-3.53971	0.9786	0.834879	6.90326
TKFC	Triokinase/FMN cyclase	Q3LXA3	AVAQAGTVGTLLIVK	95	NO	1	1.03216	0.894163	0.997992	1.04533	1.7084	0.98108	1.70854	-4.73593	0.9754	0.485562	3.20557
TTLL12	Tubulin--tyrosine ligase-like protein 12	Q14166	YIESPVLFLR	452	NO	1	0.798717	1.08337	1.16496	1.26526	1.77323	0.946496	2.08782	-0.581664	0.9027	0.530608	3.53437
UQCRC1	Cytochrome b-c1 complex subunit 1	P31930	IAEVDASVVR	433	NO	1	0.938106	0.977089	1.11125	1.40564	2.79764	0.98489	4.17665	-0.91284	0.9971	1.33805	6.15112
USP9X	Probable ubiquitin carboxyl-terminal hydrolase FAF-X	Q93008	LLLTAIGYGHVR	1157	NO	1	1.01592	1.20081	1.23672	1.29414	1.58154	0.995794	2.19405	-0.316737	0.9231	0.733746	3.31019
UTRN	Utrophin	P46939	QLGLLLHDAIQIPR	2990	NO	1	1.32457	1.57017	1.55299	1.98057	2.12522	1.00272	2.57923	-0.245505	0.9638	1.20319	3.33903
VIRMA	Protein virilizer homolog	Q69YN4	VVTAGSAILQK	546	NO	1	0.999975	1.0341	1.01168	1.09007	1.44956	1.01144	1.44965	-4.3119	0.995	0.563498	3.3722
VPS35	Vacuolar protein sorting-associated protein 35	Q96QK1	ILVGTNLVR	218	NO	1	1.04147	1.07685	1.09652	1.15604	1.5953	1.05369	1.59588	-3.59945	0.9775	0.623796	6.28431
