# Supplementary material for: A Two-Dimensional Peptide-Centric Stability Assay Maps Multidimensional Target Landscapes Unveiling 17β-Estradiol (E2)-GPX4 Binding-Induced Ferroptosis
Source: Research Square preprint supplement (doi:10.21203/rs.3.rs-6893001/v1), 2025-07-04
Supplement: Supplementary file 11 [file 88bcd09e48c7e29f399b4c4e.xlsx]

## Sheet: parameter description
Supplementary table 2.
This file summarizes staurosporine (STU)-responsive peptides and segments identified by 2D-PELSA analysis of K562 cell lysates
Tab descriptions
A	STU-responsive peptides	Summary of STU-responsive peptides as measured by 2D-PELSA in K562 cell lysates
B	STU-responsive segments	Summary of STU-responsive segments as measured by 2D-PELSA in K562 cell lysates
Experimental Setup	Compound	Concentration [mM]	Data acquisition	Replicate	Cell Line
2D-PELSA experiment, related to Figure 1 and S1	STU	100	DIA	Lysate replicate1	K562
	STU	100	DIA	Lysate replicate2
	STU	100	DIA	Lysate replicate3
	STU	100	DIA	Lysate replicate4
	STU	20	DIA	Lysate replicate1
	STU	20	DIA	Lysate replicate2
	STU	20	DIA	Lysate replicate3
	STU	20	DIA	Lysate replicate4
	STU	2	DIA	Lysate replicate1
	STU	2	DIA	Lysate replicate2
	STU	2	DIA	Lysate replicate3
	STU	2	DIA	Lysate replicate4
	STU	0.2	DIA	Lysate replicate1
	STU	0.2	DIA	Lysate replicate2
	STU	0.2	DIA	Lysate replicate3
	STU	0.2	DIA	Lysate replicate4
	STU	0.02	DIA	Lysate replicate1
	STU	0.02	DIA	Lysate replicate2
	STU	0.02	DIA	Lysate replicate3
	STU	0.02	DIA	Lysate replicate4
	DMSO	same volume as the added STU (1% volume of lysates )	DIA	Lysate replicate1
	DMSO	same volume as the added STU (1% volume of lysates )	DIA	Lysate replicate2
	DMSO	same volume as the added STU (1% volume of lysates )	DIA	Lysate replicate3
	DMSO	same volume as the added STU (1% volume of lysates )	DIA	Lysate replicate4
Column descriptions
	Cell line	The lysates from K562 used for PELSA analysis
	Gene names	Gene names of the parent protein
	Protein names	Common protein names of the parent protein
	Uniprot entry	Uniprot entry of the parent protein
	Sequence	The amino acid sequence of PELSA quantified peptide
	Sequence start position	The N-terminal position of the corresponding peptide on the protein sequence
	Log2FC	Log2 intensity fold change of the proxy peptide that was used to represent its parent protein (moderated empirical Bayes t-test)
	-Log10P.Value	-Log10 P.Value of the proxy peptide that was used to represent its parent protein (moderated empirical Bayes t-test)
	IsStabilized	yes/no log2 intensity fold change <0
	is.Kinase	yes/no Uniprot.ID mapped to kinase @ http://kinhub.org/kinases.html or https://www.uniprot.org/ identifed as part of human, reviewed kinase family
	domain_description	domain description in pfam database
	Ratio_STU treatment vs Vehice	Relative averaged peptide intensity under ligand treatment to that under vehicle treatment
	EC50 (mM)	The EC50 values calculated by fitting peptide's Ratio and ligand concentrations to a four-parameter log-logistic model.
	R2	The pearson correlation to a sigmoid trend of the ligand dose-response profile
	Lower	The bottom plateaus of the dose-response curve
	Upper	The top plateaus of the dose-response curve

## Sheet: A STU-responsive peptides
Gene names	Protein names	Uniprot entry	Sequence	Domain enrichment_pfam		Sequence start position	IsStabilized	IsKinase		Ratio_STU treatment vs Vehicle						EC50 (uM)	R2	lower	upper	Bayes T-test
				clan_name	domain_description			KinHub	Uniprot	0nM vs. 0nM	20nM vs. 0nM	200nM vs. 0nM	2uM vs. 0nM	20uM vs. 0nM	100uM vs. 0nM					Log2FC_20uM	-Log10P.Value_20uM	Log2FC_100uM	-Log10P.Value_100uM
PIK3CB	Phosphatidylinositol 4	P42338	EYAVGCLR	TPR	Protein kinase domain	621	YES	NO	YES	1	0.992953	1.00889	0.990066	0.774134	0.698334	11.6495	0.9986	0.693342	1.00059	-0.511308	1.57406	-0.629471	2.17721
AAK1	AP2-associated protein kinase 1	Q2M2I8	DLKVENILLHDR	PKinase	Protein kinase domain	176	YES	YES	YES	1	0.362074	0.225867	0.440233	0.249087	0.166977	0.0363839	0.9224	-0.299116	1.00019	-1.62518	2.76686	-2.33229	3.52235
AAK1	AP2-associated protein kinase 1	Q2M2I8	AGQTQPNPGILPIQPALTPR	AP2-associated Ser/Thr protein kinase		372	NO	YES	YES	1	1.18652	1.14457	1.50306	1.60922	1.60538	0.782975	0.9509	1.08745	1.61098	0.901465	2.39145	0.703551	2.27553
ABCE1	ATP-binding cassette sub-family E member 1	P61221	VAETANEEEVK	unannotated	P-loop containing nucleotide triphosphate hydrolases	333	NO	NO	NO	1	0.879264	1.08388	1.21408	1.31418	1.3712	0.805175	0.9303	0.944076	1.36009	0.311312	2.09726	0.427268	2.83789
ABL1	Tyrosine-protein kinase ABL1	P00519	LGGGQYGEVYEGVWK	PKinase	Protein kinase domain	248	YES	YES	YES	1	1.25797	1.45555	0.418011	0.410407	0.159835	1.49062	0.902	0.285115	1.23784	-1.83666	2.36105	-2.39736	3.16471
ABL2	Tyrosine-protein kinase ABL2	P42684	TLKEDTMEVEEFLK	PKinase	Protein kinase domain	318	YES	YES	YES	1	1.23004	0.851375	0.129763	0.211222	0.126326	0.23937	0.9744	0.155734	1.11501	-2.7673	3.99432	-3.11523	4.13129
ABL2	Tyrosine-protein kinase ABL2	P42684	LMTGDTYTAHAGAK	PKinase	Protein kinase domain	433	YES	YES	YES	1	0.85668	0.82076	0.361521	0.173143	0.312125	0.631023	0.9666	0.241158	0.933588	-2.41805	4.08069	-1.99963	3.32691
ACACA	Acetyl-CoA carboxylase 1	Q13085	RVDPVYIHLAER	ClpP_crotonase	Carboxyl transferase domain	2139	NO	NO	NO	1	1.05234	0.986381	0.995365	1.34665	1.51075	16.3969	0.9894	1.00847	1.51152	0.359949	3.0234	0.542101	4.37306
ACACA	Acetyl-CoA carboxylase 1	Q13085	LGTPELSTAER	ClpP_crotonase	Carboxyl transferase domain	2151	NO	NO	NO	1	0.993894	0.971143	1.07164	1.29834	1.45912	14.7447	0.9951	0.98667	1.5394	0.369664	3.10766	0.562341	3.88872
ACACA	Acetyl-CoA carboxylase 1	Q13085	LGTPELSTAERK	ClpP_crotonase	Carboxyl transferase domain	2151	NO	NO	NO	1	0.989904	0.926117	0.977652	1.25737	1.34345	12.1155	0.9785	0.972027	1.34614	0.27426	2.5984	0.464027	3.75779
ACADVL	Very long-chain specific acyl-CoA dehydrogenase	P49748	NPFGNAGLLLGEAGK	unannotated	unannotated	493	NO	NO	NO	1	1.0583	1.02251	1.49999	1.51808	1.86394	7.77485	0.9135	0.978731	2.06129	0.640378	1.76066	0.880145	2.2631
ACOT9	Acyl-coenzyme A thioesterase 9	Q9Y305	EKYLTVQNTVR	unannotated	Hotdog Thioesterase	102	YES	NO	NO	1	0.0458155	0.0389749	0.0518816	0.04185	0.0427452	1.12035e+130	0.9999	1.00001	-0.996084	-3.5894	2.45931	-3.61606	2.47654
ACSL1	Long-chain-fatty-acid--CoA ligase 1	P33121	VLQPTVFPVVPR	ANL	AMP-binding enzyme	357	NO	NO	NO	1	0.947671	1.10137	0.915972	1.3438	1.39213	12.6143	0.9058	0.991229	1.392	0.392212	1.16141	0.657373	2.60239
ACTB	Actin	P60709	FRCPEALFQPSFLGMESCGIHETTFNSIMKCDVDIR	Actin_ATPase	Actin	255	YES	NO	NO	1	0.873109	0.969925	0.747021	0.615262	0.694204	1.67364	0.9013	0.654734	0.947689	-0.929353	2.93114	-0.68467	2.71272
ACTN2	Alpha-actinin-2	P35609	ISNRPAFMPSEGK	Spectrin	Spectrin	354	NO	NO	NO	1	1.34597	1.57311	1.42908	2.39824	2.80003	10.7552	0.9318	1.28869	2.90574	0.998892	2.74107	1.29799	3.87491
ACTN4	Alpha-actinin-4	O43707	VGWEQLLTTIAR	Spectrin	Spectrin	734	NO	NO	NO	1	0.878464	0.864914	1.18221	1.85133	1.71146	2.41379	0.9775	0.914446	1.78144	0.896185	4.4036	0.908164	4.34406
ACTN4	Alpha-actinin-4	O43707	TINEVENQILTR	unannotated	Spectrin	746	NO	NO	NO	1	0.880758	0.849522	1.13759	1.8064	1.91372	4.68004	0.9876	0.908884	1.91783	0.81411	4.48814	0.791694	3.70797
ACTN4	Alpha-actinin-4	O43707	LASDLLEWIRR	Spectrin	Spectrin	301	NO	NO	NO	1	0.911636	0.914255	1.11672	1.42347	1.52338	4.70735	0.981	0.938902	1.53401	0.575503	3.07265	0.622566	3.24148
ACTN4	Alpha-actinin-4	O43707	CQLEINFNTLQTK	Spectrin	Spectrin	351	NO	NO	NO	1	1.09937	0.882001	1.26592	1.58264	1.6269	2.13137	0.9478	0.993739	1.60496	0.682462	3.26784	0.697278	2.97865
ACTN4	Alpha-actinin-4	O43707	LSGSNPYTTVTPQIINSK	Spectrin	Spectrin	605	NO	NO	NO	1	0.919948	1.11789	1.23642	1.55718	1.6646	4.60842	0.9776	0.967614	1.76718	0.797186	2.50237	0.972812	2.52523
ACTN4	Alpha-actinin-4	O43707	HRDYETATLSDIK	Spectrin	Spectrin	438	NO	NO	NO	1	0.638338	1.13432	1.50706	1.86579	1.82681	0.826784	0.9235	0.83617	1.86368	0.682298	1.55432	0.830906	2.07056
AKT1	RAC-alpha serine/threonine-protein kinase	P31749	TFCGTPEYLAPEVLEDNDYGR	PKinase	Protein kinase domain	308	YES	YES	YES	1	1.01821	0.835373	0.959533	0.439264	0.314057	14.491	0.9569	0.313658	0.953295	-1.16298	4.95162	-1.64376	6.17774
AKT1	RAC-alpha serine/threonine-protein kinase	P31749	FYGAEIVSALDYLHSEK	PKinase	Protein kinase domain	252	YES	YES	YES	1	0.948829	1.02534	1.02404	0.560272	0.45249	15.4679	0.9885	0.452468	0.999554	-0.755948	4.82664	-1.07424	5.90211
AKT1	RAC-alpha serine/threonine-protein kinase	P31749	HPFLTALK	PKinase	Protein kinase domain	207	YES	YES	YES	1	1.02929	1.04639	1.06223	0.381278	0.343775	11.535	0.9965	0.343819	1.0345	-1.36544	3.84474	-1.73189	5.00095
AKT1	RAC-alpha serine/threonine-protein kinase	P31749	LSPPFKPQVTSETDTR	Catalytic domain of the Serine/Threonine Kinase	Protein kinase domain	421	YES	YES	YES	1	1.13522	0.961566	0.918458	0.434345	0.272541	8.13606	0.9742	0.228775	1.03913	-1.435	3.64978	-2.20338	4.13342
AKT1	RAC-alpha serine/threonine-protein kinase	P31749	FFAGIVWQHVYEK	Catalytic domain of the Serine/Threonine Kinase	Protein kinase domain	407	YES	YES	YES	1	1.02845	1.0725	1.13614	0.665753	0.624359	12.2193	0.956	0.624384	1.05929	-0.818009	2.46883	-0.796829	3.33051
AKT1	RAC-alpha serine/threonine-protein kinase	P31749	SLLSGLLK	PKinase	Protein kinase domain	378	YES	YES	YES	1	0.93258	0.964121	1.09043	0.621914	0.594312	11.9057	0.9352	0.594234	0.996786	-0.507428	2.10872	-0.780134	3.08009
AKT1	RAC-alpha serine/threonine-protein kinase	P31749	VTMNEFEYLK	Catalytic domain of the Serine/Threonine Kinase	Protein kinase domain	145	YES	YES	YES	1	0.926304	1.03575	1.0225	0.560028	0.432734	15.5572	0.9794	0.432745	0.996231	-0.812017	3.41453	-1.46493	2.70901
AKT2	RAC-beta serine/threonine-protein kinase	P31751	FYGAEIVSALEYLHSR	PKinase	Protein kinase domain	254	YES	YES	YES	1	1.38107	1.12313	1.00674	0.360337	0.208419	6.46327	0.9289	0.183905	1.17234	-1.39332	3.52872	-2.29039	6.02217
AKT2	RAC-beta serine/threonine-protein kinase	P31751	SLLAGLLK	PKinase	Protein kinase domain	379	YES	YES	YES	1	0.864957	1.05195	0.707393	0.470763	0.327488	3.36091	0.934	0.342992	0.975295	-1.0405	3.68362	-1.34305	3.83548
AKT2	RAC-beta serine/threonine-protein kinase	P31751	AKVTMNDFDYLK	Catalytic domain of the Serine/Threonine Kinase	Protein kinase domain	145	YES	YES	YES	1	1.02684	1.03162	0.682093	0.298191	0.43436	1.9777	0.9813	0.366279	1.01949	-1.72079	2.19668	-1.12308	1.24704
ALDH1B1	Aldehyde dehydrogenase X	P30837	IEEVVER	ALDH-like	Aldehyde dehydrogenase family	430	NO	NO	NO	1	1.77234	1.54097	3.10518	3.22805	3.46884	0.70685	0.94	1.37705	3.35479	1.2345	2.17314	0.286229	0.101932
ANKHD1	Ankyrin repeat and KH domain-containing protein 1	Q8IWZ3	VLLNEGANIEDHNENGHTPLMEAASAGHVEVAR	Ank	Ankyrin repeats (3 copies)	323	YES	NO	NO	1	1.04136	1.15676	0.925626	0.345426	0.533273	2.50277	0.9398	0.43935	1.06605	-1.20543	2.03687	-0.943659	1.60126
ANXA11	Annexin A11	P50995	SRAHLVAVFNEYQR	Annexin	Annexin	387	NO	NO	NO	1	1.00121	1.09997	1.02687	1.05161	1.36536	26.6487	0.932	1.03197	1.36536	0.0272497	0.106977	0.374092	2.26454
AP2M1	AP-2 complex subunit mu	Q96CW1	EEQSQITSQVTGQIGWR	unannotated	unannotated	146	NO	NO	NO	1	1.18239	1.49042	1.41247	1.48965	1.58353	0.0263374	0.9408	0.99993	1.49629	0.471168	2.97495	0.581274	3.66951
AP2M1	AP-2 complex subunit mu	Q96CW1	QSIAIDDCTFHQCVR	Cargo_bd_muHD	Adaptor complexes medium subunit family	239	NO	NO	NO	1	1.12183	1.2227	1.22871	1.24922	1.38742	0.690582	0.9154	0.996416	1.44587	0.404847	2.81461	0.491533	3.02723
ARF1	ADP-ribosylation factor 1	P84077	HYFQNTQGLIFVVDSNDRER	P-loop_NTPase	ADP-ribosylation factor family	80	YES	NO	NO	1	0.943029	0.949405	0.921005	0.807117	0.705283	46.4728	0.9757	0.533914	0.974942	-0.213231	1.60404	-0.389497	2.77278
ARF5	ADP-ribosylation factor 5	P84085	TWYVQATCATQGTGLYDGLDWLSHELSKR	unannotated	unannotated	152	YES	NO	NO	1	0.885198	0.427289	0.413069	0.44188	0.394103	0.0365759	0.9969	0.416343	0.999998	-1.11522	2.06641	-0.890664	1.11068
ARFGAP1	ADP-ribosylation factor GTPase-activating protein 1	Q8N6T3	DVTTFFSGK	unannotated	unannotated	289	NO	NO	NO	1	1.17941	1.23213	1.24764	1.40147	1.44203	1.0077	0.964	0.999291	1.5683	0.325775	1.51777	0.403095	2.29256
ARL8B	ADP-ribosylation factor-like protein 8B	Q9NVJ2	MLALISR	unannotated	unannotated	1	NO	NO	NO	1	0.999817	0.847713	0.997078	1.47796	1.47218	3.40504	0.9581	0.949321	1.47523	0.565907	1.53745	0.644744	2.23339
ASPM	Abnormal spindle-like microcephaly-associated protein	Q8IZT6	DAEFKASKEILLAFSR	unannotated	unannotated	916	NO	NO	NO	1	0.963323	0.906156	0.912006	1.23261	1.62847	21.3626	0.985	0.945357	1.62881	0.429015	2.63735	0.737882	4.10811
ATG4A	Cysteine protease ATG4A	Q8WYN0	QHLLKTEK	unannotated	unannotated	35	NO	NO	NO	1	1.3529	1.78187	1.37222	3.10424	3.10408	4.83669	0.9284	1.37553	3.10421	1.83535	2.13929	1.79244	1.97311
ATXN10	Ataxin-10	Q9UBB4	ETTNIFSNCGCVR	unannotated	unannotated	346	NO	NO	NO	1	0.991999	0.989838	1.01779	1.11046	1.28025	35.4449	0.9964	0.996544	1.35668	0.263442	1.52531	0.394006	2.28502
AURKA	Aurora kinase A	O14965	DIKPENLLLGSAGELK	PKinase	Protein kinase domain	256	YES	YES	YES	1	0.817578	0.295409	0.315473	0.402036	0.23885	0.0270757	0.9727	0.312718	0.999959	-1.59795	3.85439	-1.92041	4.23071
AURKA	Aurora kinase A	O14965	ISRVEFTFPDFVTEGAR	PKinase	Protein kinase domain	341	YES	YES	YES	1	0.784988	0.418621	0.276075	0.336744	0.305343	0.0423102	0.9944	0.304487	0.999098	-1.53263	4.67242	-1.84828	3.90763
AURKA	Aurora kinase A	O14965	TATYITELANALSYCHSKR	PKinase	Protein kinase domain	233	YES	YES	YES	1	0.571575	0.193047	0.182276	0.178467	0.102484	0.0196247	0.9936	0.152374	1.00008	-2.78457	4.63292	-3.10856	3.76369
AURKA	Aurora kinase A	O14965	LYGYFHDATR	PKinase	Protein kinase domain	196	YES	YES	YES	1	0.77988	0.136687	0.223337	0.113644	0.125533	0.0250495	0.9902	0.149788	1	-2.32106	2.45093	-2.28323	2.41409
BCCIP	BRCA2 and CDKN1A-interacting protein	Q9P287	APVNTAELTDLLIQQNHIGSVIK	BCCIP	BCCIP	85	YES	NO	NO	1	0.95579	0.8004	0.747534	0.831639	0.736987	0.0521714	0.909	0.772242	0.999632	-0.327323	1.40324	-0.460299	2.60316
BLVRA	Biliverdin reductase A	P53004	FGFPAFSGISR	GADPH_aa-bio_dh	Biliverdin reductase, catalytic	162	NO	YES	YES	1	1.16286	1.08664	1.22812	1.60171	1.78042	9.21537	0.973	1.07369	1.8614	0.531854	2.9335	0.636233	2.68462
BLVRA	Biliverdin reductase A	P53004	MNAEPERK	unannotated	unannotated	1	NO	YES	YES	1	0.768244	0.715071	0.811152	1.14875	1.5464	21.041	0.9061	0.823596	1.54773	0.437022	1.4119	0.661749	2.30181
BLVRA	Biliverdin reductase A	P53004	DLRNPHPSSAFLNLIGFVSRR	NADP_Rossmann	Oxidoreductase family, NAD-binding Rossmann fold	26	NO	YES	YES	1	1.03366	0.880563	1.05844	1.18193	1.56981	40.7037	0.9397	0.987035	1.73977	0.246816	1.12698	0.498077	2.23013
BLVRB	Flavin reductase (NADPH)	P30043	LQAVTDDHIR	NADP_Rossmann	NAD(P)H-binding	125	YES	NO	NO	1	0.880042	0.943099	0.899287	0.458941	0.324503	9.79694	0.9822	0.311412	0.941373	-1.20629	6.79263	-1.55069	5.75214
BLVRB	Flavin reductase (NADPH)	P30043	NDLSPTTVMSEGAR	NADP_Rossmann	NAD(P)H-binding	79	YES	NO	NO	1	0.89777	0.845524	0.703588	0.3771	0.34146	3.61383	0.9816	0.232043	0.965716	-1.26813	5.64545	-1.57849	5.65122
BLVRB	Flavin reductase (NADPH)	P30043	YVAVMPPHIGDQPLTGAYTVTLDGRGPSR	NADP_Rossmann	NAD(P)H-binding	146	YES	NO	NO	1	0.781654	0.641451	0.465766	0.189977	0.119391	2.96557	0.9955	-0.193339	0.996703	-2.18752	5.83849	-2.8393	5.57211
BLVRB	Flavin reductase (NADPH)	P30043	CLTTDEYDGHSTYPSHQYQ	unannotated	unannotated	188	YES	NO	NO	1	0.896041	0.784955	0.757061	0.253291	0.196268	4.97696	0.9619	0.176655	0.89985	-1.70773	4.23412	-2.11066	4.85854
BLVRB	Flavin reductase (NADPH)	P30043	VVACTSAFLLWDPTKVPPR	NADP_Rossmann	NAD(P)H-binding	106	YES	NO	NO	1	0.803826	0.453991	0.551522	0.143971	0.139908	2.20711	0.9164	-0.199186	1.00437	-2.87556	5.62283	-2.55837	4.64167
BLVRB	Flavin reductase (NADPH)	P30043	AHGVDKVVACTSAFLLWDPTKVPPR	NADP_Rossmann	NAD(P)H-binding	100	YES	NO	NO	1	0.914381	0.880343	0.603682	0.0922949	0.0436708	3.06368	0.9944	0.0126789	0.948073	-2.84769	3.52178	-3.89414	3.93173
BLVRB	Flavin reductase (NADPH)	P30043	TVAGQDAVIVLLGTR	NADP_Rossmann	NAD(P)H-binding	64	YES	NO	NO	1	0.859051	0.829027	0.761351	0.359511	0.313081	4.60935	0.9606	0.293752	0.902311	-1.31216	4.11048	-1.92125	3.64411
BLVRB	Flavin reductase (NADPH)	P30043	HDLGHFMLR	NADP_Rossmann	NAD(P)H-binding	179	YES	NO	NO	1	1.08649	1.00312	0.878729	0.350806	0.315876	4.156	0.9922	0.311566	1.0313	-1.39116	3.53335	-2.48625	2.41575
BLVRB	Flavin reductase (NADPH)	P30043	VISKHDLGHFMLR	NADP_Rossmann	NAD(P)H-binding	175	YES	NO	NO	1	0.977298	0.885195	0.804708	0.736812	0.654702	3.08123	0.9867	0.580666	1.00683	-0.702929	1.78865	-0.851024	2.33652
BMP2K	BMP-2-inducible protein kinase	Q9NSY1	LQTGFTEPEVLQIFCDTCEAVAR	PKinase	Protein kinase domain	146	YES	YES	YES	1	0.513304	0.0247383	0.014834	0.0120854	0.0267181	0.0201651	0.9999	0.0178779	1	-5.85756	5.68952	-4.97913	6.99719
BMP2K	BMP-2-inducible protein kinase	Q9NSY1	MYVNNMPDLNVCKR	PKinase	Protein kinase domain	81	YES	YES	YES	1	0.571529	0.0194562	0.0127378	0.0182515	0.0258627	0.0215581	0.9999	0.0189495	0.999992	-5.29143	6.57482	-4.95868	6.32896
BMP2K	BMP-2-inducible protein kinase	Q9NSY1	DLKVENILLNDGGNYVLCDFGSATNK	PKinase	Protein kinase domain	180	YES	YES	YES	1	0.691728	0.128168	0.0918878	0.12055	0.0967492	0.0284941	0.9994	0.10305	0.999994	-3.2817	6.12382	-3.77295	5.36768
BMP2K	BMP-2-inducible protein kinase	Q9NSY1	AGQVVNQMNKK	PKinase	Protein kinase domain	135	YES	YES	YES	1	0.794068	0.0987049	0.0536934	0.087512	0.0652517	0.0371805	0.9993	0.06882	0.999984	-3.52232	6.18897	-3.52183	4.82048
BMP2K	BMP-2-inducible protein kinase	Q9NSY1	FMLEPDPEHRPDIFQVSYFAFK	Protein kinase-like (PK-like)	Protein kinase domain	296	YES	YES	YES	1	0.660407	0.157811	0.0951128	0.157636	0.161701	0.0244373	0.9959	0.140339	1.00172	-2.77822	4.24609	-2.73448	4.23178
BRAF	Serine/threonine-protein kinase B-raf	P15056	MLNVTAPTPQQLQAFK	PKinase	Protein kinase domain	484	NO	YES	YES	1	2.9682	1.53469	4.34017	4.97195	9.80719	222.678	0.9102	1.87045	21.5163	1.90551	1.49706	2.47915	2.13189
BTK	Tyrosine-protein kinase BTK	Q06187	LVQLYGVCTK	PKinase	Protein kinase domain	457	NO	YES	YES	1	0.988996	1.7763	2.73279	3.19578	3.16936	0.400596	0.9963	0.940747	3.20621	1.64532	8.55364	1.63359	8.00005
BTK	Tyrosine-protein kinase BTK	Q06187	NCLVNDQGVVK	PKinase	Protein kinase domain	526	NO	YES	YES	1	0.868261	1.5683	2.48315	2.85919	2.97793	0.500055	0.9925	0.905235	2.95066	1.60314	6.99998	1.61495	6.80861
BTK	Tyrosine-protein kinase BTK	Q06187	YVLDDEYTSSVGSKFPVR	PKinase	Protein kinase domain	545	NO	YES	YES	1	1.18031	2.09432	3.05706	3.39648	3.29998	0.235978	0.9984	0.990274	3.35841	1.63877	6.58663	1.59865	6.49574
BTK	Tyrosine-protein kinase BTK	Q06187	WSPPEVLMYSK	PKinase	Protein kinase domain	563	NO	YES	YES	1	1.03565	1.81427	3.91615	3.90408	4.09842	0.335545	0.9983	1.01127	4.00369	2.13874	6.47462	2.14225	6.36506
BTK	Tyrosine-protein kinase BTK	Q06187	FTNSETAEHIAQGLR	PKinase	Protein kinase domain	601	NO	YES	YES	1	1.16946	2.3513	3.6282	4.04282	3.97388	0.251129	0.999	0.974562	4.01841	1.93443	6.44083	1.85018	6.20335
BTK	Tyrosine-protein kinase BTK	Q06187	VSDFGLSR	PKinase	Protein kinase domain	537	NO	YES	YES	1	0.959087	1.75803	2.69861	2.8327	2.7336	0.233547	0.9978	0.966172	2.77238	1.47007	6.42102	1.43143	6.1863
BTK	Tyrosine-protein kinase BTK	Q06187	ELGTGQFGVVK	PKinase	Protein kinase domain	407	NO	YES	YES	1	1.0614	1.59049	2.50071	2.64145	2.50348	0.284059	0.9964	1.01632	2.5747	1.33436	5.88596	1.28146	5.53493
BTK	Tyrosine-protein kinase BTK	Q06187	GQYDVAIK	PKinase	Protein kinase domain	423	NO	YES	YES	1	0.943095	1.36201	2.66028	2.76308	2.77749	0.414671	0.9995	0.967895	2.77018	1.51066	5.40206	1.51674	5.3495
BTK	Tyrosine-protein kinase BTK	Q06187	ILLSNILDVMDEES	Protein kinase-like (PK-like)	Protein kinase domain	646	NO	YES	YES	1	1.04907	1.77345	2.83384	3.83322	3.75231	0.845833	0.9939	0.968337	3.92097	1.79421	4.9397	1.70216	4.36526
BTK	Tyrosine-protein kinase BTK	Q06187	NAPSTAGLGYGSWEIDPK	Protein kinase-like (PK-like)	Protein kinase domain	383	NO	YES	YES	1	1.38575	1.23019	2.30415	2.34133	2.54317	0.830304	0.9577	1.19113	2.44328	1.18178	3.88892	1.17172	4.16452
BTK	Tyrosine-protein kinase BTK	Q06187	YVLDDEYTSSVGSK	PKinase	Protein kinase domain	545	NO	YES	YES	1	1.13624	1.94014	2.98572	4.02365	3.71169	0.607957	0.9854	0.986933	3.948	2.08561	4.93797	1.76786	3.27558
BTK	Tyrosine-protein kinase BTK	Q06187	SQAEQLLK	SH2-like	SH2 domain	289	NO	YES	YES	1	1.08765	1.0272	1.47956	1.53178	1.45865	0.86997	0.9785	1.03791	1.49566	0.516788	2.57014	0.495772	2.35717
BTK	Tyrosine-protein kinase BTK	Q06187	DLTFLKELGTGQFGVVK	Protein kinase-like (PK-like)	Protein kinase domain	401	NO	YES	YES	1	1.47699	2.06889	4.35341	4.66247	5.19491	0.531707	0.988	1.15866	5.00349	1.58606	2.00565	1.70784	2.07831
BUB1	Mitotic checkpoint serine/threonine-protein kinase BUB1	O43683	LIVLLLECKR	Protein kinase-like (PK-like)	Protein kinase domain	1073	YES	YES	YES	1	1.05493	0.923662	0.182983	0.105364	0.204531	0.465695	0.9938	0.15535	1.02756	-2.92568	4.27439	-2.42421	4.03574
CAD	Multifunctional protein CAD	P27708	TPHVLVLGSGVYR	unannotated	unannotated	932	YES	NO	NO	1	0.969707	0.933581	0.893493	0.690037	0.591497	12.3186	0.9907	0.498335	0.981543	-0.527493	2.61866	-0.756879	3.73572
CAD	Multifunctional protein CAD	P27708	ELSDLESAR	ATP-grasp	Carbamoyl-phosphate synthase L chain, ATP binding domain	1067	YES	NO	NO	1	0.913829	1.01127	1.00069	0.814114	0.631467	20.4144	0.9449	0.63112	0.981449	-0.418354	2.63166	-0.853188	3.3075
CAD	Multifunctional protein CAD	P27708	TLGVDLVALATR	ATP-grasp	Carbamoyl-phosphate synthase L chain, ATP binding domain	1229	YES	NO	NO	1	0.916828	0.930179	0.954069	0.841824	0.659322	27.0395	0.9455	0.63991	0.950527	-0.238838	1.7186	-0.497184	3.2503
CAD	Multifunctional protein CAD	P27708	LLDTIGISQPQWR	ATP-grasp	Carbamoyl-phosphate synthase L chain, ATP binding domain	1054	YES	NO	NO	1	0.916473	0.943268	0.826223	0.777786	0.575386	81.4831	0.9396	0.261776	0.971634	-0.37423	1.574	-0.654288	3.24777
CAD	Multifunctional protein CAD	P27708	VLGTSPEAIDSAENR	unannotated	unannotated	1034	YES	NO	NO	1	0.999603	1.00122	1.01498	0.844722	0.736975	18.5643	0.9975	0.736935	1.00395	-0.296293	1.63694	-0.418128	2.11198
CALM1	Calmodulin-1	P0DP23	VFDKDGNGYISAAELR	EF_hand	EF-hand domain pair	92	YES	NO	NO	1	0.943229	0.868916	0.892803	0.746712	0.662127	38.5164	0.943	0.44581	0.987914	-0.290076	1.77849	-0.586698	3.37069
CAMK2G	Calcium/calmodulin-dependent protein kinase type II subunit gamma	Q13555	NLINQMLTINPAKR	PKinase	Protein kinase domain	247	YES	YES	YES	1	0.268553	0.15309	0.211903	0.233017	0.272151	4.77284e+07	0.9813	1.0024	-0.546367	-1.99374	4.94617	-2.09521	5.0864
CCNB1	G2/mitotic-specific cyclin-B1	P14635	ISTLPQLNSALVQDLAK	unannotated	unannotated	412	YES	NO	NO	1	0.969741	0.824291	0.714724	0.739857	0.661327	0.146377	0.9694	0.6981	1.00161	-0.425377	3.03612	-0.661623	4.17961
CCNB1	G2/mitotic-specific cyclin-B1	P14635	NVVMVNQGLTK	Cyclin	Cyclin, C-terminal domain	386	YES	NO	NO	1	0.957061	0.665986	0.667662	0.622463	0.492891	0.0764086	0.9199	0.590694	1.00439	-0.523325	2.17039	-0.883714	3.67795
CCNB1	G2/mitotic-specific cyclin-B1	P14635	DIYAYLR	Cyclin	Cyclin, N-terminal domain	173	YES	NO	NO	1	0.907074	0.778772	0.760625	0.673018	0.523223	30.5262	0.9597	0.224702	0.999388	-0.376775	1.25717	-0.701664	2.12008
CCNB2	G2/mitotic-specific cyclin-B2	O95067	VAAAASCLSQK	Cyclin	Cyclin, C-terminal domain	308	YES	NO	NO	1	0.942624	0.311068	0.354238	0.184987	0.130582	0.0709714	0.9635	0.221687	1.00234	-1.96067	2.97908	-2.35169	2.4708
CCNB2	G2/mitotic-specific cyclin-B2	O95067	AGEVDVEQHTLAK	Cyclin	Cyclin, C-terminal domain	276	YES	NO	NO	1	0.816865	0.378914	0.396835	0.332296	0.555954	0.0238593	0.9231	0.41599	1.00001	-1.30036	2.35014	-0.937919	1.53293
CCT3	T-complex protein 1 subunit gamma	P49368	KISIPVDISDSDMMLNIINSSITTK	Cpn60_TCP1	Cpn60_TCP1	139	YES	NO	NO	1	1.1382	0.68188	0.651235	0.730746	0.583912	0.132022	0.9159	0.655312	1.06911	-0.462641	1.02172	-0.999992	2.72535
CDC42BPB	Serine/threonine-protein kinase MRCK beta	Q9Y5S2	GAFGEVAVVK	PKinase	Protein kinase domain	85	YES	YES	YES	1	0.708612	0.662837	0.57869	0.333694	0.169019	55.4014	0.9772	-0.494019	0.987191	-1.79067	4.99663	-2.32867	3.79832
CDC42BPB	Serine/threonine-protein kinase MRCK beta	Q9Y5S2	LADFGSCLK	PKinase	Protein kinase domain	216	YES	YES	YES	1	0.641723	0.644508	0.634999	0.42866	0.447285	1.24716	0.9408	0.138019	0.999682	-0.997937	2.84387	-1.22177	3.69275
CDC42BPG	Serine/threonine-protein kinase MRCK gamma	Q6DT37	LASSTAPYIPELR	Protein kinase-like (PK-like)	Protein kinase domain	345	YES	YES	YES	1	0.45085	0.453987	0.400968	0.291326	0.300757	0.137076	0.9903	-0.131964	1.00006	-1.72047	4.28553	-2.79336	2.07559
CDC5L	Cell division cycle 5-like protein	Q99459	DLPRPSEVNETILRPLNVEPPLTDLQK	Myb_Cef	Myb_Cef	544	YES	NO	NO	1	0.798124	0.710573	0.651997	0.700458	0.616518	0.0115346	0.9628	0.646963	1.00013	-0.500716	1.90432	-0.580714	2.57867
CDK1	Cyclin-dependent kinase 1	P06493	HPNIVSLQDVLMQDSR	PKinase	Protein kinase domain	60	YES	YES	YES	1	0.996981	0.869575	0.696758	0.554553	0.605691	0.557237	0.9856	0.57382	1.00681	-0.712647	3.57984	-0.744981	4.7245
CDK1	Cyclin-dependent kinase 1	P06493	LESEEEGVPSTAIR	PKinase	Protein kinase domain	37	YES	YES	YES	1	0.938024	0.883004	0.78045	0.802466	0.740676	0.174078	0.9572	0.753236	0.998921	-0.297621	2.46802	-0.390102	2.39307
CDK10	Cyclin-dependent kinase 10	Q15131	EITLLLR	PKinase	Protein kinase domain	86	YES	YES	YES	1	0.899533	0.807826	0.585586	0.625811	0.522767	0.224651	0.9578	0.547549	0.991867	-0.935283	2.45966	-0.924443	2.30826
CDK13	Cyclin-dependent kinase 13	Q14004	CVDKFDIIGIIGEGTYGQVYK	Protein kinase-like (PK-like)	Protein kinase domain	701	YES	YES	YES	1	0.869379	0.622359	0.569101	0.506806	0.538737	0.0508537	0.9931	0.53185	1.00099	-0.813242	2.30168	-0.926069	2.39821
CDK2	Cyclin-dependent kinase 2	P24941	ALFPGDSEIDQLFR	PKinase	Protein kinase domain	201	YES	YES	YES	1	0.806214	0.370403	0.201679	0.135831	0.110611	0.0742232	0.9979	0.130204	1.00317	-2.6966	7.36298	-3.06148	8.32924
CDK2	Cyclin-dependent kinase 2	P24941	AALAHPFFQDVTKPVPHLRL	Protein kinase-like (PK-like)	Protein kinase domain	279	YES	YES	YES	1	0.845701	0.375106	0.154113	0.109855	0.095565	0.0896577	0.9996	0.105359	1.00179	-3.10488	8.72009	-3.52474	7.37655
CDK2	Cyclin-dependent kinase 2	P24941	SLLSQMLHYDPNKR	PKinase	Protein kinase domain	261	YES	YES	YES	1	0.97222	0.380504	0.211382	0.155783	0.0862948	0.112624	0.9915	0.147779	1.00779	-3.07131	5.0382	-3.43487	6.87962
CDK2	Cyclin-dependent kinase 2	P24941	NKLTGEVVALKK	PKinase	Protein kinase domain	23	YES	YES	YES	1	0.958002	0.278396	0.0656815	0.0281564	0.0262061	0.107602	0.9993	0.0378127	1.00236	-4.83253	6.80947	-5.04786	6.60303
CDK2	Cyclin-dependent kinase 2	P24941	APEILLGCK	PKinase	Protein kinase domain	170	YES	YES	YES	1	0.8442	0.203834	0.0996104	0.05273	0.0186833	0.0624922	0.9971	0.0533109	1.00134	-4.61181	6.62249	-5.56133	6.43168
CDK2	Cyclin-dependent kinase 2	P24941	LDTETEGVPSTAIR	PKinase	Protein kinase domain	37	YES	YES	YES	1	0.947306	0.312898	0.138059	0.0504459	0.0320722	0.103801	0.9945	0.0687278	1.00715	-3.90677	5.48219	-4.48941	5.50444
CDK2	Cyclin-dependent kinase 2	P24941	VVPPLDEDGR	PKinase	Protein kinase domain	251	YES	YES	YES	1	0.894837	0.322061	0.175787	0.129898	0.0773008	0.0828513	0.9953	0.12186	1.00348	-3.04076	8.61619	-3.49107	5.29119
CDK2	Cyclin-dependent kinase 2	P24941	DLKPQNLLINTEGAIK	PKinase	Protein kinase domain	127	YES	YES	YES	1	0.826207	0.341107	0.115004	0.0747304	0.0425793	0.0862912	0.9992	0.0609779	1.00204	-3.49619	6.69102	-4.18287	5.27644
CDK2	Cyclin-dependent kinase 2	P24941	FMDASALTGIPLPLIK	PKinase	Protein kinase domain	90	YES	YES	YES	1	0.975282	0.319711	0.084597	0.0993535	0.096561	0.117802	0.9998	0.0927278	0.998851	-3.6262	5.56552	-3.32241	5.10656
CDK2	Cyclin-dependent kinase 2	P24941	TLGTPDEVVWPGVTSMPDYKPSFPK	PKinase	Protein kinase domain	218	YES	YES	YES	1	0.754151	0.28457	0.113793	0.0669371	0.0833717	0.0565796	0.9996	0.0767287	1.00039	-3.78081	5.41411	-4.33921	4.38615
CDK2	Cyclin-dependent kinase 2	P24941	LTGEVVALK	PKinase	Protein kinase domain	25	YES	YES	YES	1	1.31352	0.0691602	0.0873419	0.0464786	0.0717068	0.121833	0.9693	0.0684499	1.15676	-4.2955	5.10552	-3.754	4.28572
CDK2	Cyclin-dependent kinase 2	P24941	NKLTGEVVALK	PKinase	Protein kinase domain	23	YES	YES	YES	1	0.811378	0.150728	0.0408027	0.0799974	0.102152	0.0457852	0.9977	0.0742581	0.999745	-3.61603	4.64895	-2.86897	3.85594
CDK2	Cyclin-dependent kinase 2	P24941	RALFPGDSEIDQLFR	PKinase	Protein kinase domain	200	YES	YES	YES	1	0.929134	0.356315	0.149986	0.0526854	0.0733688	0.107617	0.9961	0.0836454	1.00746	-3.96979	5.29565	-5.03691	2.79023
CDK5	Cyclin-dependent kinase 5	Q00535	DLKPQNLLINR	PKinase	Protein kinase domain	126	YES	YES	YES	1	1.00668	0.276577	0.180814	0.158013	0.152067	0.138772	0.9995	0.163631	1.00336	-2.77621	8.83107	-2.68578	8.56084
CDK5	Cyclin-dependent kinase 5	Q00535	DLLQNLLK	PKinase	Protein kinase domain	261	YES	YES	YES	1	0.890022	0.246339	0.142593	0.162974	0.128525	0.0617422	0.9992	0.143945	0.999936	-2.63401	6.69536	-2.78592	7.64787
CDK5	Cyclin-dependent kinase 5	Q00535	NRETHEIVALKR	PKinase	Protein kinase domain	23	YES	YES	YES	1	0.808232	0.132603	0.0310175	0.0315418	0.0860872	0.0467825	0.9978	0.0491728	0.999821	-4.63543	5.709	-3.76594	5.7067
CDK5	Cyclin-dependent kinase 5	Q00535	LPDYKPYPMYPATTSLVNVVPK	PKinase	Protein kinase domain	233	YES	YES	YES	1	0.822953	0.089547	0.0781294	0.13239	0.0605183	0.0886273	0.9799	0.0899356	0.911498	-3.64242	2.78207	-3.70405	5.68423
CDK5	Cyclin-dependent kinase 5	Q00535	IGEGTYGTVFK	PKinase	Protein kinase domain	10	YES	YES	YES	1	0.926447	0.232329	0.166936	0.157404	0.114891	0.0661462	0.9982	0.1459	1.00025	-3.16337	4.44832	-4.40437	2.53134
CDK6	Cyclin-dependent kinase 6	Q00534	ISAYSALSHPYFQDLER	Protein kinase-like (PK-like)	Protein kinase domain	289	NO	YES	YES	1	0.99907	1.02435	1.19613	1.3559	1.43389	2.98276	0.9964	0.991797	1.45079	0.445539	4.62926	0.527173	5.06131
CDK6	Cyclin-dependent kinase 6	Q00534	CLTFNPAKR	PKinase	Protein kinase domain	280	NO	YES	YES	1	1.00406	1.12699	1.25225	1.43907	1.49219	2.11648	0.9941	0.991229	1.54992	0.428037	3.29177	0.520084	4.68645
CDK6	Cyclin-dependent kinase 6	Q00534	ILDVIGLPGEEDWPR	PKinase	Protein kinase domain	231	NO	YES	YES	1	0.998352	0.971693	1.14623	1.35636	1.3716	2.25306	0.9963	0.989909	1.36441	0.441516	4.02664	0.462948	4.02873
CDK6	Cyclin-dependent kinase 6	Q00534	FVTDIDELGKDLLLK	PKinase	Protein kinase domain	265	NO	YES	YES	1	0.982858	1.04587	1.1328	1.30723	1.3806	5.54122	0.9957	0.991461	1.43472	0.564031	2.65423	0.555823	2.77046
CDK6	Cyclin-dependent kinase 6	Q00534	GSSDVDQLGK	PKinase	Protein kinase domain	221	NO	YES	YES	1	0.940912	0.9193	1.10292	1.2675	1.48677	26.2498	0.9663	0.95302	1.69016	0.531357	2.15135	0.648562	2.58766
CDK6	Cyclin-dependent kinase 6	Q00534	VRVQTGEEGMPLSTIR	PKinase	Protein kinase domain	45	NO	YES	YES	1	1.01354	1.12366	1.06408	1.34192	1.29206	3.85499	0.9008	1.04578	1.31716	0.30349	1.72486	0.337052	2.21398
CDK7	Cyclin-dependent kinase 7	P50613	LDFLGEGQFATVYK	PKinase	Protein kinase domain	15	YES	YES	YES	1	1.02227	0.736698	0.385456	0.180261	0.150171	0.554874	0.9949	0.14136	1.02916	-2.52897	6.70728	-2.94804	5.36332
CDK9	Cyclin-dependent kinase 9	P50750	VVTLWYRPPELLLGER	PKinase	Protein kinase domain	189	YES	YES	YES	1	1.03683	0.479515	0.323463	0.290786	0.221452	0.15609	0.9909	0.278667	1.01852	-1.74309	6.24329	-2.11429	5.87106
CDK9	Cyclin-dependent kinase 9	P50750	IGQGTFGEVFK	PKinase	Protein kinase domain	25	YES	YES	YES	1	0.96896	0.516494	0.43036	0.378313	0.310861	0.0985911	0.9854	0.370671	1.00502	-1.53486	6.12053	-1.62879	5.74556
CDK9	Cyclin-dependent kinase 9	P50750	AANVLITR	PKinase	Protein kinase domain	152	YES	YES	YES	1	0.916433	0.34836	0.271668	0.297643	0.25177	0.061186	0.9982	0.273298	0.999972	-1.85959	7.24577	-2.26336	5.30739
CDK9	Cyclin-dependent kinase 9	P50750	HENVVNLIEICR	PKinase	Protein kinase domain	75	YES	YES	YES	1	0.924988	0.22156	0.180222	0.179371	0.207284	0.0524136	0.9994	0.188937	0.999984	-2.88809	4.55948	-2.69077	4.31353
CDK9	Cyclin-dependent kinase 9	P50750	ILQLLKHENVVNLIEICR	PKinase	Protein kinase domain	69	YES	YES	YES	1	0.772929	0.18601	0.161425	0.133808	0.0944501	0.0384706	0.9972	0.128775	1.00016	-2.49562	2.99415	-2.62609	2.83581
CDKN2C	Cyclin-dependent kinase 4 inhibitor C	P42773	AEPWGNELASAAAR	unannotated	unannotated	2	NO	NO	NO	1	0.941319	0.794986	1.44442	1.8987	2.09569	2.02627	0.9715	0.911953	1.99777	0.958793	2.27158	1.05317	2.46384
CEP135	Centrosomal protein of 135 kDa	Q66GS9	QTLTVECLPLVEK	unannotated	unannotated	23	NO	NO	NO	1	1.70636	1.05043	2.36366	3.4202	3.1426	1.91461	0.9349	1.25224	3.28142	1.05679	1.14493	1.4548	2.12245
CFAP36	Cilia- and flagella-associated protein 36	Q96G28	LLEGYLKEIGINEDQFQEACTSPLAK	ARL2_Bind_BART	ARL2_Bind_BART	64	NO	NO	NO	1	1.64032	1.60652	1.66324	1.70206	1.88554	0.143068	0.9631	0.999336	2.27304	0.387699	0.498801	0.835952	3.79391
CHEK1	Serine/threonine-protein kinase Chk1	O14757	ISDFGLATVFR	PKinase	Protein kinase domain	146	YES	YES	YES	1	0.743415	0.415455	0.368371	0.314777	0.311349	0.0325863	0.9966	0.324656	1.00064	-1.47083	5.19676	-1.52305	5.52543
CHEK1	Serine/threonine-protein kinase Chk1	O14757	KIDSAPLALLHK	PKinase	Protein kinase domain	233	YES	YES	YES	1	0.714572	0.190359	0.114088	0.110696	0.106241	0.0353199	1	0.10881	1.00001	-3.23787	5.95746	-3.40789	5.29368
CHEK1	Serine/threonine-protein kinase Chk1	O14757	MCGTLPYVAPELLK	PKinase	Protein kinase domain	167	YES	YES	YES	1	0.839331	0.325174	0.271826	0.260388	0.202324	0.0486058	0.9956	0.243081	1.00037	-2.21997	3.99885	-2.10371	5.12333
CHEK1	Serine/threonine-protein kinase Chk1	O14757	DIKPENLLLDERDNLK	PKinase	Protein kinase domain	130	YES	YES	YES	1	0.882801	0.491788	0.281962	0.330571	0.235981	0.091014	0.9912	0.27523	0.998808	-1.83664	4.06286	-2.04417	4.52163
CHEK1	Serine/threonine-protein kinase Chk1	O14757	VTEEAVAVK	PKinase	Protein kinase domain	30	YES	YES	YES	1	0.696371	0.3011	0.335233	0.238897	0.346927	0.0214994	0.9842	0.305468	1.00001	-2.41829	3.47565	-2.12644	2.15439
CHEK1	Serine/threonine-protein kinase Chk1	O14757	DIKPENLLLDER	PKinase	Protein kinase domain	130	YES	YES	YES	1	1.26159	0.449823	0.476368	0.162131	0.332152	0.14392	0.9068	0.323567	1.13081	-2.63405	3.07119	-1.55788	1.75991
CHEK2	Serine/threonine-protein kinase Chk2	O96017	TLCGTPTYLAPEVLVSVGTAGYNR	PKinase	Protein kinase domain	383	YES	YES	YES	1	0.947958	0.493493	0.51753	0.448313	0.497014	0.0426983	0.992	0.48759	0.999996	-1.57479	2.30592	-1.02149	1.07729
CLK2	Dual specificity protein kinase CLK2	P49760	LTLGEALQHPFFAR	Protein kinase-like (PK-like)	Protein kinase domain	468	YES	YES	YES	1	0.929023	0.199889	0.152668	0.270159	0.139495	0.0458056	0.9872	0.187469	0.999991	-1.69085	1.88512	-2.12648	2.41234
CLUH	Clustered mitochondria protein homolog	O75153	AVGSISSTAFDIR	unannotated	unannotated	704	YES	NO	NO	1	0.983182	0.964842	0.813669	0.407351	0.255977	6.94961	0.9998	0.20176	0.991719	-1.22132	4.07053	-1.92398	5.84117
CLUH	Clustered mitochondria protein homolog	O75153	HYILDLLR	CLU	CLU	561	YES	NO	NO	1	0.918952	0.939414	0.661214	0.396356	0.279044	3.19108	0.9906	0.243309	0.977756	-1.15141	3.96875	-1.67356	5.54777
CLUH	Clustered mitochondria protein homolog	O75153	YLELLER	CLU	CLU	517	YES	NO	NO	1	1.03822	0.663227	0.542529	0.383315	0.262535	0.455268	0.9524	0.27849	1.04137	-1.56046	4.09896	-2.39576	3.36724
CLUH	Clustered mitochondria protein homolog	O75153	VLELVLR	eIF3_p135	eIF3_p135	792	YES	NO	NO	1	0.965424	0.825981	0.74831	0.500541	0.229227	162.302	0.9915	-0.664114	0.995041	-0.867808	3.36545	-1.85167	2.49917
CLUH	Clustered mitochondria protein homolog	O75153	FNPDIFSPGVR	unannotated	unannotated	717	YES	NO	NO	1	0.839615	0.756229	0.683137	0.343255	0.343534	7.17316	0.9588	0.0266959	0.988221	-1.12865	1.89145	-1.88691	2.15764
CLUH	Clustered mitochondria protein homolog	O75153	LGYEEHIPGQTR	unannotated	unannotated	344	YES	NO	NO	1	1.00817	0.792924	0.714546	0.296086	0.346714	2.25071	0.9488	0.240612	0.999881	-1.29333	2.06229	-1.93021	1.80841
CNOT11	CCR4-NOT transcription complex subunit 11	Q9UKZ1	LLTAAEQR	unannotated	unannotated	13	NO	NO	NO	1	0.90894	1.02794	1.1006	1.18865	2.44425	45.895	0.9888	1.00904	2.64673	0.619756	1.40029	1.07809	2.08236
COG1	Conserved oligomeric Golgi complex subunit 1	Q8WTW3	FGLLPLSMTSTR	unannotated	unannotated	911	NO	NO	NO	1	0.961961	1.06898	1.23283	1.24846	1.28117	0.377508	0.9846	0.979623	1.26432	0.324101	1.97175	0.39863	2.91802
COPS7A	COP9 signalosome complex subunit 7a	Q9UBW8	VTTAAAAAATSQDPEQHLTELREPAPGTNQR	unannotated	unannotated	222	YES	NO	NO	1	0.883539	0.821907	0.778565	0.641753	0.691715	0.319007	0.9509	0.616262	0.998272	-0.636774	2.37525	-0.552063	2.19451
COQ8A	Atypical kinase COQ8A	Q8NI60	AAILGDTIMVAK	kinase-like domain		2	NO	YES	YES	1	1.23071	1.09702	1.40748	1.77355	2.19054	21.3245	0.9692	1.07582	2.59698	0.737463	2.27321	0.898564	2.6475
CSK	Tyrosine-protein kinase CSK	P41240	SVLGGDCLLK	PKinase	Protein kinase domain	284	YES	YES	YES	1	1.08395	0.964221	0.75563	0.695981	0.705425	0.54027	0.9717	0.701044	1.04133	-0.466295	2.10793	-0.579296	3.69689
CSK	Tyrosine-protein kinase CSK	P41240	GSLVDYLR	PKinase	Protein kinase domain	272	YES	YES	YES	1	0.933866	0.895807	0.767781	0.690149	0.687999	0.61496	0.9896	0.66287	0.991607	-0.529604	3.1391	-0.549118	3.02552
CSK	Tyrosine-protein kinase CSK	P41240	SGWALNMK	Protein kinase-like (PK-like)	Protein kinase domain	186	YES	YES	YES	1	1.02337	0.741691	0.735044	0.725552	0.654416	0.130754	0.9662	0.704999	1.0117	-0.310408	1.15748	-0.571779	2.25283
CSK	Tyrosine-protein kinase CSK	P41240	EASSTQDTGKLPVK	PKinase	Protein kinase domain	338	YES	YES	YES	1	1.00328	0.908293	0.682676	0.347314	0.502351	1.67949	0.9532	0.42133	0.981367	-1.91773	2.88523	-1.25563	2.16607
CSNK1E	Casein kinase I isoform epsilon	P49674	YASINTHLGIEQSR	PKinase	Protein kinase domain	179	YES	YES	YES	1	1.05858	1.14937	1.02443	0.825126	0.68529	14.9558	0.9186	0.652028	1.06665	-0.354199	1.69631	-0.539311	2.56136
CSNK1E	Casein kinase I isoform epsilon	P49674	FDDKPDYSYLR	Protein kinase-like (PK-like)	Protein kinase domain	260	YES	YES	YES	1	0.954435	1.03099	1.03083	0.874934	0.72805	20.6219	0.9435	0.727729	1.00407	-0.210373	0.920668	-0.42812	2.50084
CSNK1E	Casein kinase I isoform epsilon	P49674	DVKPDNFLMGLGKK	PKinase	Protein kinase domain	128	YES	YES	YES	1	1.05637	0.991928	0.879878	0.750431	0.73237	2.05288	0.9803	0.72585	1.02577	-0.382259	1.87531	-0.441889	2.21079
CSNK2A1	Casein kinase II subunit alpha	P68400	LIDWGLAEFYHPGQEYNVR	PKinase	Protein kinase domain	173	YES	YES	YES	1	0.746363	0.75424	0.562751	0.540279	0.555272	0.0485251	0.9471	0.485351	0.997928	-0.664614	2.13218	-1.18944	1.83891
CSNK2A2	Casein kinase II subunit alpha'	P19784	HLVSPEALDLLDKLLR	PKinase	Protein kinase domain	292	YES	YES	YES	1	0.997009	0.678273	0.242952	0.119809	0.160108	0.309509	0.9978	0.14029	1.01429	-2.84554	5.98634	-2.73705	5.83028
CSNK2A2	Casein kinase II subunit alpha'	P19784	LIDWGLAEFYHPAQEYNVR	PKinase	Protein kinase domain	174	YES	YES	YES	1	0.869328	0.63131	0.283106	0.183961	0.189158	0.248992	0.9977	0.16705	0.988375	-2.77248	4.44415	-2.61971	5.2655
CSNK2A2	Casein kinase II subunit alpha'	P19784	VLGTEELYGYLK	PKinase	Protein kinase domain	249	YES	YES	YES	1	1.00573	0.799061	0.576648	0.55504	0.599495	0.20462	0.9954	0.577037	1.0029	-0.916216	5.95144	-0.848495	4.85888
CSNK2A2	Casein kinase II subunit alpha'	P19784	FYMYELLK	PKinase	Protein kinase domain	136	YES	YES	YES	1	1.04157	0.547324	0.106425	0.0546375	0.0538391	0.20155	0.9977	0.0670039	1.0261	-4.34049	4.1811	-4.41002	4.48274
CSNK2A2	Casein kinase II subunit alpha'	P19784	KYHIDLDPHFNDILGQHSR	PKinase	Protein kinase domain	261	YES	YES	YES	1	1.03581	1.12064	0.420117	0.313603	0.450714	1.28139	0.9744	0.382155	1.05215	-1.57247	3.31716	-1.31101	4.36138
CSNK2A2	Casein kinase II subunit alpha'	P19784	QLYQILTDFDIR	PKinase	Protein kinase domain	124	YES	YES	YES	1	0.818467	0.900877	0.392441	0.0616151	0.135366	1.71969	0.9769	0.0983904	0.906523	-3.64143	4.18098	-2.66019	4.04982
CSNK2A2	Casein kinase II subunit alpha'	P19784	EPFFHGQDNYDQLVR	PKinase	Protein kinase domain	231	YES	YES	YES	1	1.3574	0.812992	0.117915	0.160902	0.145471	0.226159	0.9541	0.141567	1.17867	-2.58828	3.43086	-2.81083	3.86922
CSNK2A2	Casein kinase II subunit alpha'	P19784	VLGTEELYGYLKK	PKinase	Protein kinase domain	249	YES	YES	YES	1	0.878736	0.746633	0.415216	0.438486	0.428068	0.261716	0.9778	0.420758	0.947199	-1.20509	4.40181	-1.17017	3.49231
CSNK2A2	Casein kinase II subunit alpha'	P19784	YHIDLDPHFNDILGQHSR	PKinase	Protein kinase domain	262	YES	YES	YES	1	0.953498	0.882877	0.549775	0.458828	0.548212	0.476412	0.9823	0.503314	0.978928	-1.01801	3.95256	-0.842477	3.46961
CTNND1	Catenin delta-1	O60716	SDKKPDREEIQMSNMGSNTK	unannotated	unannotated	879	YES	NO	NO	1	0.869395	0.6006	0.658278	0.294229	0.341431	1.2655	0.909	0.140812	1.00319	-1.43974	2.64589	-1.56283	2.75697
CTPS1	CTP synthase 1	P17812	IYQYVINK	P-loop_NTPase	CTP synthase N-terminus	93	YES	NO	NO	1	1.01117	0.935688	1.0064	0.895712	0.749893	22.3778	0.9262	0.749361	0.988318	-0.108228	0.676897	-0.331733	2.39052
DCAF7	DDB1- and CUL4-associated factor 7	P61962	DMFASVGADGSVR	unannotated	unannotated	190	NO	NO	NO	1	1.00418	0.914052	1.13612	1.99717	1.83259	2.83853	0.9833	0.972732	1.91495	1.26376	2.03571	1.31479	2.21078
DCUN1D5	DCN1-like protein 5	Q9BTE7	YAFDFAR	EF_hand	Cullin binding	144	NO	NO	NO	1	1.03008	1.02923	1.20844	2.44335	3.29829	16.2814	0.9999	1.01488	3.56149	1.26797	7.08674	1.64603	7.72842
DCUN1D5	DCN1-like protein 5	Q9BTE7	VMNKDQWYNVLEFSR	EF_hand	Cullin binding	191	NO	NO	NO	1	0.974141	0.998219	1.2422	2.28202	3.73675	57.6468	0.9998	0.979237	5.46973	1.20936	5.07494	1.8475	7.22845
DCUN1D5	DCN1-like protein 5	Q9BTE7	SMLALLLGR	EF_hand	Cullin binding	164	NO	NO	NO	1	0.995203	0.921821	1.14958	2.75408	3.63695	13.6794	0.9993	0.97143	3.79512	1.56807	6.84878	2.00072	7.09
DCUN1D5	DCN1-like protein 5	Q9BTE7	DQWYNVLEFSR	EF_hand	Cullin binding	195	NO	NO	NO	1	0.738418	0.956569	1.03347	2.39422	3.17146	14.1818	0.9921	0.895014	3.31535	1.40985	4.12699	1.8801	5.07456
DCUN1D5	DCN1-like protein 5	Q9BTE7	SQLNDISSFK	EF_hand	Cullin binding	130	NO	NO	NO	1	0.847223	0.825432	1.25696	2.3704	2.98765	11.1857	0.9939	0.884548	3.20913	1.5519	3.74061	1.89847	4.28444
DCUN1D5	DCN1-like protein 5	Q9BTE7	LISGEEHFSSKK	unannotated	unannotated	39	NO	NO	NO	1	0.896991	0.801577	0.773758	1.71386	1.92359	15.6111	0.9749	0.868079	1.92363	0.767471	1.43429	1.1852	2.53535
DDX6	Probable ATP-dependent RNA helicase DDX6	P26196	IKTSDVTSTK	unannotated	unannotated	85	NO	NO	NO	1	1.05913	1.13851	1.23993	1.40184	1.62349	9.63009	0.9795	1.00959	1.76993	0.468433	3.80352	0.555523	3.10903
DHCR7	7-dehydrocholesterol reductase	Q9UBM7	VIECSYTSADGQR	Steroid_dh	Ergosterol biosynthesis ERG4/ERG24 family	377	NO	NO	NO	1	0.606853	0.874429	1.05109	1.75118	2.51207	33.9717	0.9675	0.816824	3.21189	0.873216	1.41735	1.59712	2.78183
DNMBP	Dynamin-binding protein	Q6XZF7	QWHSQSALFQIPEYSMGQAR	unannotated	unannotated	132	NO	NO	NO	1	1.41413	1.03392	2.39424	2.15067	2.08053	0.594302	0.9131	1.14928	2.20849	1.10777	2.8078	0.986318	2.71165
DOHH	Deoxyhypusine hydroxylase	Q9BU89	HECAEALGAIARPACLAALQAHADDPER	TPR	HEAT repeats	240	YES	NO	NO	1	0.671199	0.618896	0.730191	0.703007	0.664782	112302	0.9245	0.999966	0.354052	-0.503037	2.30336	-0.608574	2.48787
DYRK1A	Dual specificity tyrosine-phosphorylation-regulated kinase 1A	Q13627	IVDFGSSCQLGQR	PKinase	Protein kinase domain	305	YES	YES	YES	1	0.77802	0.111752	0.162943	0.0859946	0.067653	0.0305864	0.994	0.105429	1	-3.17137	5.14147	-3.5267	4.5708
EIF2AK2	Interferon-induced	P19525	IGDFGLVTSLK	PKinase	Protein kinase domain	430	YES	YES	YES	1	1.00607	0.952896	0.80482	0.502875	0.420062	4.43104	0.999	0.383	1.00062	-0.90168	5.78414	-1.16574	6.77502
EIF2AK2	Interferon-induced	P19525	DLKPSNIFLVDTK	PKinase	Protein kinase domain	414	YES	YES	YES	1	1.0852	1.05897	1.01102	0.660013	0.569074	8.85214	0.9846	0.56126	1.0482	-0.659626	5.11247	-0.887756	5.53583
EIF2AK2	Interferon-induced	P19525	KPEDRPNTSEILR	PKinase	Protein kinase domain	522	YES	YES	YES	1	0.91276	0.919906	0.842145	0.500608	0.425604	5.87066	0.985	0.409186	0.947872	-1.03537	4.23326	-1.23164	5.3452
EIF2AK2	Interferon-induced	P19525	EIELIGSGGFGQVFK	PKinase	Protein kinase domain	269	YES	YES	YES	1	1.07536	0.894347	0.950067	0.568062	0.479337	8.25901	0.9454	0.469414	0.991954	-0.710249	4.15273	-0.953757	4.96456
EIF2AK2	Interferon-induced	P19525	VLALELFEQITK	PKinase	Protein kinase domain	389	YES	YES	YES	1	1.02301	1.09091	0.926578	0.565266	0.494459	5.35628	0.9845	0.490477	1.0379	-0.757411	5.55963	-1.08364	4.71709
EIF2AK2	Interferon-induced	P19525	YMSPEQISSQDYGK	PKinase	Protein kinase domain	454	YES	YES	YES	1	1.04137	1.03778	0.636921	0.178653	0.203947	2.05254	0.9984	0.191297	1.02639	-2.30709	4.39401	-2.01733	3.59043
EIF2AK2	Interferon-induced	P19525	FGMDFKEIELIGSGGFGQVFK	Protein kinase-like (PK-like)	Protein kinase domain	263	NO	YES	YES	1	2.30264	1.18213	5.01671	4.8415	4.29782	0.615876	0.9243	1.49479	4.71876	2.28431	3.58618	2.05051	3.30796
EIF2AK2	Interferon-induced	P19525	IGDFGLVTSLKNDGKR	PKinase	Protein kinase domain	430	YES	YES	YES	1	1.00771	0.956894	1.02932	0.828098	0.607762	21.0919	0.979	0.607557	0.998483	-0.363205	1.5989	-0.613671	2.99129
EIF2AK2	Interferon-induced	P19525	GTLEQWIEKR	PKinase	Protein kinase domain	372	YES	YES	YES	1	0.503365	0.621745	0.309486	0.106716	0.181889	1.19444	0.9164	-0.264018	0.996336	-2.62536	3.3162	-2.42686	2.87265
EIF2AK2	Interferon-induced	P19525	DGIISDIFDKK	PKinase	Protein kinase domain	500	YES	YES	YES	1	0.987746	0.942863	0.895035	0.705968	0.638134	7.53178	0.9922	0.584146	0.989479	-0.588145	1.57799	-0.571826	2.631
EIF2AK2	Interferon-induced	P19525	LDKVLALELFEQITK	PKinase	Protein kinase domain	386	YES	YES	YES	1	0.932328	0.908816	0.961008	0.617812	0.556427	12.7609	0.9746	0.55668	0.950642	-0.532478	1.53117	-0.869082	2.39831
EIF2AK4	eIF-2-alpha kinase GCN2	Q9P2K8	LFREILDGLAYIHEK	PKinase	Protein kinase domain	828	YES	YES	YES	1	1.08862	1.10507	0.941965	0.599282	0.532242	4.92146	0.9777	0.528996	1.065	-0.618016	2.90459	-0.728915	2.79515
EIF2B3	Translation initiation factor eIF2B subunit gamma	Q9NR50	GADIKDCLIGSGQR	unannotated	unannotated	418	YES	NO	NO	1	0.95159	0.994566	0.645441	0.656175	0.624466	0.936374	0.9891	0.640379	0.982073	-0.633502	1.95229	-0.93513	3.12773
EIF3D	Eukaryotic translation initiation factor 3 subunit D	O15371	AKFMTPVIQDNPSGWGPCAVPEQFR	unannotated	unannotated	2	YES	NO	NO	1	1.08623	1.12197	1.12581	0.916727	0.747255	20.1565	0.9058	0.745346	1.08356	-0.335454	1.1129	-0.39967	2.33453
EIF4A3	Eukaryotic initiation factor 4A-III	P38919	DVIAQSQSGTGK	P-loop_NTPase	DEAD/DEAH box helicase	77	NO	NO	NO	1	1.03925	0.987403	1.15187	1.30115	1.49769	18.8877	0.976	1.00255	1.6433	0.252944	1.36628	0.515692	3.74888
EPRS1	Bifunctional glutamate/proline--tRNA ligase	P07814	VASQGEVVR	S15_NS1	WHEP-TRS domain	908	NO	NO	NO	1	0.902013	1.08174	1.35814	1.24292	1.27006	0.225172	0.922	0.950994	1.29038	0.309072	2.18404	0.324207	2.50708
FASN	Fatty acid synthase	P49327	HFLLEEDKPEEPTAHAFVSTLTR	unannotated	unannotated	1516	YES	NO	NO	1	0.890564	0.764954	0.801905	0.676708	0.542439	39.6136	0.9297	0.240499	0.995806	-0.510402	1.31523	-0.822111	2.40846
FECH	Ferrochelatase	P22830	LFLDRDLMTLPIQNK	Chelatase	Ferrochelatase	92	YES	NO	NO	1	1.01201	0.942073	0.680085	0.436502	0.383122	1.88171	0.9994	0.37203	1.00967	-1.27267	5.61893	-1.44194	6.40476
FECH	Ferrochelatase	P22830	VGPMPWLGPQTDESIKGLCER	Chelatase	Ferrochelatase	305	YES	NO	NO	1	1.01685	0.865457	0.645457	0.536316	0.419282	1.08607	0.9857	0.419417	1.02236	-1.03637	3.39513	-1.22444	3.84822
FECH	Ferrochelatase	P22830	ALADLVHSHIQSNELCSK	unannotated	unannotated	380	YES	NO	NO	1	0.859584	0.636316	0.475917	0.461477	0.323035	0.149665	0.9781	0.355604	1.00529	-1.11498	2.26674	-1.23819	2.00537
FHOD1	FH1/FH2 domain-containing protein 1	Q9Y613	QVALAQGR	unannotated	unannotated	455	NO	NO	NO	1	1.06863	1.0398	1.39609	1.41441	1.3762	0.540464	0.9843	1.03424	1.39608	0.310498	1.39441	0.366545	2.13541
FN3KRP	Ketosamine-3-kinase	Q9HA64	ELGCSSVR	Protein kinase-like (PK-like)	Protein kinase domain	8	NO	NO	YES	1	1.09283	0.936326	1.3885	1.67022	1.9864	9.69262	0.9572	0.995079	2.17086	0.717181	2.49119	0.708766	2.05666
FRG1	Protein FRG1	Q14331	KFQSFQDHK	Trefoil	FRG1-like domain	212	YES	NO	NO	1	0.882165	0.93699	0.664055	0.662517	0.581627	0.952522	0.9318	0.62182	0.941728	-0.855364	2.15087	-0.699791	1.64292
GAK	Cyclin-G-associated kinase	O14976	LCDFGSATTISHYPDYSWSAQR	PKinase	Protein kinase domain	189	YES	YES	YES	1	0.968682	0.389182	0.10616	0.124278	0.147679	0.129859	0.9988	0.124825	0.995827	-3.47555	4.72713	-2.89844	6.69911
GAK	Cyclin-G-associated kinase	O14976	LSIAEVVHQLQEIAAAR	Protein kinase-like (PK-like)	Protein kinase domain	304	YES	YES	YES	1	0.946799	0.502523	0.414474	0.438281	0.35578	0.0781415	0.9913	0.401826	1.00046	-1.2801	5.28851	-1.49472	5.69769
GAK	Cyclin-G-associated kinase	O14976	AMLQVNPEER	PKinase	Protein kinase domain	294	YES	YES	YES	1	0.923723	0.489816	0.375418	0.409177	0.363384	0.0724108	0.9972	0.381562	0.999651	-1.22878	5.2472	-1.33401	5.3508
GAK	Cyclin-G-associated kinase	O14976	DLKVENLLLSNQGTIK	PKinase	Protein kinase domain	173	YES	YES	YES	1	1.02262	0.575704	0.392722	0.415034	0.453993	0.165061	0.9949	0.420584	1.01131	-1.25503	4.03764	-1.4464	3.22253
GALK1	Galactokinase	P51570	KDGLVSLLTTSEGADEPQRLQFPLPTAQR	Protein kinase-like (PK-like)	Protein kinase domain	69	YES	NO	YES	1	0.803858	0.761913	0.752179	0.750567	0.741028	0.00252305	0.9991	0.745249	1.00001	-0.406896	2.39953	-0.312284	1.95484
GARS1	Glycine--tRNA ligase	P41250	LLEFNQGKLPFAAAQIGNSFRNEISPR	tRNA_synt_II	tRNA synthetase class II core domain (G, H, P, S and T)	311	NO	NO	NO	1	0.857351	0.969261	0.827441	1.21169	1.5489	20.5254	0.9426	0.913513	1.54923	0.124747	0.384269	0.522595	2.62761
GART	Trifunctional purine biosynthetic protein adenosine-3	P22102	VFSWLQQEGHLSEEEMAR	AIRS_C	AIRS_C	712	NO	NO	NO	1	1.05859	0.917695	1.03581	1.23257	1.41257	19.6442	0.936	0.994851	1.47075	0.262803	1.58672	0.43616	2.56704
GART	Trifunctional purine biosynthetic protein adenosine-3	P22102	AFAHITGGGLLENIPR	AIRS_C	AIRS_C	677	NO	NO	NO	1	1.01675	1.10099	1.09874	1.32483	1.31642	3.5229	0.9428	1.03895	1.32312	0.251673	1.21773	0.344645	2.10053
GART	Trifunctional purine biosynthetic protein adenosine-3	P22102	EEAWVIGSVVAR	AIRS_C	AIRS_C	758	NO	NO	NO	1	1.05225	0.271823	0.301412	2.11901	3.15314	18.506	0.913	0.656342	3.15453	1.44852	2.58847	1.45155	1.67066
GBF1	Golgi-specific brefeldin A-resistance guanine nucleotide exchange factor 1	Q92538	LDALEWESCFNKVLFPLLTK	unannotated	unannotated	1581	YES	NO	NO	1	0.835035	0.893493	0.72399	0.494607	0.506658	2.22668	0.9349	0.494653	0.912877	-1.2938	2.23881	-0.966974	1.76705
GCN1	Stalled ribosome sensor GCN1	Q92616	EGALFAFEMLCTMLGK	unannotated	unannotated	1436	YES	NO	NO	1	0.440449	0.548728	0.492995	0.263434	0.352051	0.193907	0.9111	-0.0670466	1.00017	-1.62765	2.5608	-0.977311	1.37025
GMPR2	GMP reductase 2	Q9P2T1	YAGGVAEYR	TIM_barrel	IMP dehydrogenase / GMP reductase domain	278	YES	NO	NO	1	1.10576	1.17542	0.833429	0.747363	0.634272	1.76293	0.9022	0.690834	1.09373	-0.456447	1.9188	-0.830544	3.2914
GMPS	GMP synthase [glutamine-hydrolyzing]	P49915	TFITSDFMTGIPATPGNEIPVEVVLK	GMP_synt_C	GMP_synt_C	639	YES	NO	NO	1	0.850722	0.784279	0.688955	0.745725	0.630484	0.0548578	0.9258	0.635187	1.00066	-0.317862	1.34428	-0.495048	2.05665
GOLPH3	Golgi phosphoprotein 3	Q9H4A6	GCMLIELALR	GPP34	GPP34	91	YES	NO	NO	1	0.957033	0.838562	0.767719	0.670095	0.636883	0.675523	0.9913	0.604026	1.00471	-0.361188	1.00706	-0.711543	2.0873
GRK2	Beta-adrenergic receptor kinase 1	P25098	LGYLLFR	RGS	Regulator of G protein signaling domain	63	YES	YES	YES	1	0.871461	0.951392	0.736869	0.66586	0.608774	1.63357	0.9204	0.637285	0.941006	-0.601529	3.80274	-0.791831	3.54144
GRK2	Beta-adrenergic receptor kinase 1	P25098	ILLPEPSIR	Protein kinase-like (PK-like)	Protein kinase domain	32	YES	YES	YES	1	0.899071	0.737691	0.644185	0.598838	0.452807	1.71449	0.9695	0.328256	1.00585	-0.766066	3.7842	-0.96702	2.89413
GRK2	Beta-adrenergic receptor kinase 1	P25098	LLDSDQELYR	Protein kinase-like (PK-like)	Protein kinase domain	498	YES	YES	YES	1	1.01143	0.912427	0.653693	0.65375	0.521925	0.575827	0.9621	0.578819	1.01088	-0.630886	2.37251	-0.715461	2.24376
GRK6	G protein-coupled receptor kinase 6	P43250	FVVSLAYAYETK	PKinase	Protein kinase domain	245	YES	YES	YES	1	0.974924	0.908567	0.804108	0.590128	0.520807	4.91839	0.9965	0.434788	0.994769	-0.765571	2.40969	-0.705453	1.39341
GSK3A	Glycogen synthase kinase-3 alpha	P49840	LTIPILYVK	PKinase	Protein kinase domain	214	YES	YES	YES	1	0.960769	0.283039	0.0583506	0.0342685	0.0255243	0.110286	0.9996	0.0373713	1.00176	-5.11147	6.58389	-5.09376	8.10836
GSK3A	Glycogen synthase kinase-3 alpha	P49840	SRTPPEAIALCSSLLEYTPSSR	PKinase	Protein kinase domain	370	YES	YES	YES	1	0.753459	0.46229	0.0823696	0.0645317	0.0394831	0.123115	0.9928	0.019804	0.989476	-3.65014	5.46494	-4.44891	7.51291
GSK3A	Glycogen synthase kinase-3 alpha	P49840	VIGNGSFGVVYQAR	PKinase	Protein kinase domain	124	YES	YES	YES	1	0.925349	0.326636	0.108938	0.094891	0.0926415	0.0983723	1	0.0953879	1.00041	-3.1858	6.21048	-3.53595	7.21022
GSK3A	Glycogen synthase kinase-3 alpha	P49840	LCDFGSAK	PKinase	Protein kinase domain	261	YES	YES	YES	1	1.01735	0.385641	0.191469	0.189526	0.14732	0.159708	0.9984	0.1761	1.00869	-2.7028	5.43772	-3.08923	5.83443
GSK3A	Glycogen synthase kinase-3 alpha	P49840	TPPEAIALCSSLLEYTPSSR	PKinase	Protein kinase domain	372	YES	YES	YES	1	0.893058	0.42905	0.171054	0.212439	0.159283	0.101444	0.9969	0.174655	0.996796	-2.37437	7.12482	-2.50581	5.62936
GSK3A	Glycogen synthase kinase-3 alpha	P49840	VTTVVATLGQGPER	Protein kinase-like (PK-like)	Protein kinase domain	100	YES	YES	YES	1	0.938192	0.626182	0.533488	0.548458	0.538658	0.0728901	0.9992	0.539178	0.999578	-0.839698	5.83129	-0.888461	5.31379
GSK3A	Glycogen synthase kinase-3 alpha	P49840	EMNPNYTEFKFPQIK	PKinase	Protein kinase domain	346	YES	YES	YES	1	0.841439	0.446771	0.285437	0.217157	0.257495	0.0751323	0.9978	0.2416	1.00106	-2.02726	5.32797	-2.01752	5.21086
GSK3B	Glycogen synthase kinase-3 beta	P49841	VIGNGSFGVVYQAK	PKinase	Protein kinase domain	61	YES	YES	YES	1	0.875714	0.247129	0.0765775	0.0728198	0.0726597	0.0729681	1	0.0714202	0.999878	-3.93512	6.2826	-3.65366	7.19341
GSK3B	Glycogen synthase kinase-3 beta	P49841	LLEYTPTAR	PKinase	Protein kinase domain	320	YES	YES	YES	1	0.929855	0.354453	0.119107	0.124398	0.140275	0.101562	0.9995	0.125269	0.998281	-2.82146	7.43948	-2.84784	6.64922
GSK3B	Glycogen synthase kinase-3 beta	P49841	DTPALFNFTTQELSSNPPLATILIPPHAR	Protein kinase-like (PK-like)	Protein kinase domain	355	YES	YES	YES	1	0.953016	0.264056	0.174546	0.096087	0.126227	0.0837272	0.9967	0.131344	1.00131	-3.3007	5.7657	-2.97291	5.94305
GSK3B	Glycogen synthase kinase-3 beta	P49841	QTLPVIYVK	PKinase	Protein kinase domain	151	YES	YES	YES	1	1.01021	0.238273	0.164932	0.0910892	0.0907933	0.135782	0.9963	0.115605	1.00516	-3.27915	5.08211	-3.30413	5.1645
GSTP1	Glutathione S-transferase P	P09211	TLGLYGKDQQEAALVDMVNDGVEDLRCK	unannotated	unannotated	76	YES	NO	NO	1	0.8888	1.0538	0.654769	0.687995	0.600644	1.14124	0.9025	0.644295	0.980867	-0.763129	2.98672	-0.813098	3.61045
GSTP1	Glutathione S-transferase P	P09211	LKAFLASPEYVNLPINGNGKQ	unannotated	unannotated	190	YES	NO	NO	1	0.909155	0.91666	0.750011	0.757431	0.684194	0.834843	0.9259	0.651825	0.995917	-0.33251	3.28472	-0.441328	3.03481
GSTP1	Glutathione S-transferase P	P09211	ALPGQLKPFETLLSQNQGGK	GST_C	Glutathione S-transferase, C-terminal domain	122	YES	NO	NO	1	0.960219	0.927261	0.738243	0.787907	0.659295	0.450736	0.9039	0.720703	0.982067	-0.368488	2.05643	-0.568511	2.4352
H2AC11	Histone H2A type 1	P0C0S8	NDEELNKLLGK	unannotated	unannotated	90	NO	NO	NO	1	1.00449	0.99572	0.97424	1.11556	1.28086	21.9961	0.9922	0.993596	1.28274	0.177253	2.245	0.362569	4.66984
H2BC11	Histone H2B type 1-J	P06899	KESYSIYVYK	Histone	Core histone H2A/H2B/H3/H4	35	NO	NO	NO	1	1.0119	1.04532	1.00709	1.16819	1.269	17.6107	0.98	1.01601	1.27002	0.183165	2.06986	0.326261	3.5103
HADHA	Trifunctional enzyme subunit alpha	P40939	KTVLGTPEVLLGALPGAGGTQRLPK	ClpP_crotonase	Enoyl-CoA hydratase/isomerase	166	YES	NO	NO	1	0.822414	0.834118	0.755494	0.753637	0.660972	4.45181	0.948	0.497676	0.999472	-0.57581	2.04629	-1.16527	1.47472
HAT1	Histone acetyltransferase type B catalytic subunit	O14929	TFFPEYTHQLFGDDETAFGYK	C2H2-zf	Histone acetyl transferase HAT1 N-terminus	50	NO	NO	NO	1	0.793584	0.917342	0.858927	1.23972	1.37555	16.4663	0.9119	0.89244	1.37553	0.186022	0.470864	0.436613	2.02799
HBG1	Hemoglobin subunit gamma-1	P69891	EFTPEVQASWQK	Globin	Globin	122	NO	NO	NO	1	1.04506	0.975429	1.1145	1.22401	1.29651	5.1848	0.9496	1.00512	1.30825	0.211664	1.83188	0.460427	2.2028
HMBS	Porphobilinogen deaminase	P08397	DLPTVLPPGFTIGAICKR	PBP	Porphobilinogen deaminase, dipyromethane cofactor binding domain	99	YES	NO	NO	1	0.960885	0.935419	0.972398	0.8438	0.697478	21.3494	0.9665	0.694388	0.967267	-0.11703	0.500995	-0.416444	2.85264
HMGB3	High mobility group protein B3	O15347	MSAYAFFVQTCR	HMG-box	HMG-box domain	13	NO	NO	NO	1	1.10001	1.05662	1.18802	1.27202	1.44785	6.55318	0.9298	1.0234	1.49141	0.323498	4.37302	0.45398	3.69296
HNRNPH2	Heterogeneous nuclear ribonucleoprotein H2	P55795	FFSDCKIQNGTSGIR	RRM	RNA recognition motif. (a.k.a. RRM, RBD, or RNP domain)	30	NO	NO	NO	1	0.927545	0.991966	0.867303	0.774247	1.75573	111.181	0.9437	0.9122	3.36987	-0.128423	0.226959	0.804459	2.11778
HNRNPLL	Heterogeneous nuclear ribonucleoprotein L-like	Q8WVV9	DTPELVAYPLPQASSSYMHGGNPSGSVVMVSGLHQLK	unannotated	unannotated	310	YES	NO	NO	1	0.906328	0.840183	0.759186	0.616328	0.59837	2.12129	0.9909	0.480035	0.997431	-0.694374	2.04158	-0.449566	0.993757
HNRNPM	Heterogeneous nuclear ribonucleoprotein M	P52272	AFITNIPFDVKWQSLK	unannotated	unannotated	73	NO	NO	NO	1	1.06601	1.00381	1.14251	0.954806	1.69272	101.443	0.9447	1.03337	2.40298	-0.0167048	0.0270309	0.794841	2.62115
HOOK2	Protein Hook homolog 2	Q96ED9	QSLAQENAGLR	HOOK	HOOK	209	NO	NO	NO	1	0.89628	0.963562	1.11628	1.27295	1.49999	20.9093	0.9631	0.945275	1.68067	0.187976	0.550317	0.49249	2.30684
HSPA1A	Heat shock 70 kDa protein 1A	P0DMV8	LLQDFFNGR	Actin_ATPase	Hsp70 protein	349	NO	NO	NO	1	1.05802	1.02365	1.14273	1.26837	1.35364	5.4204	0.9768	1.01672	1.38252	0.462261	2.6277	0.516526	3.12513
HSPA1A	Heat shock 70 kDa protein 1A	P0DMV8	IINEPTAAAIAYGLDR	Actin_ATPase	Hsp70 protein	172	NO	NO	NO	1	0.99873	0.977782	1.06058	1.21039	1.3026	10.8938	0.9923	0.990745	1.34234	0.279342	1.20808	0.459459	2.72549
HSPA1A	Heat shock 70 kDa protein 1A	P0DMV8	FGDPVVQSDMK	Actin_ATPase	Hsp70 protein	78	NO	NO	NO	1	1.37401	1.57018	2.06444	2.47209	2.36193	0.413883	0.9797	1.02727	2.53958	0.999251	2.20375	0.97009	2.28097
HSPBP1	Hsp70-binding protein 1	Q9NZL4	TEHSPFHEHVLGALCSLVTDFPQGVR	unannotated	unannotated	283	YES	NO	NO	1	1.10816	1.08388	1.01476	0.599432	0.743412	3.16368	0.9204	0.67138	1.0641	-0.673193	2.02765	-0.577162	1.992
INTS2	Integrator complex subunit 2	Q9H0H0	RYAFFMPTLPSLVSFCR	INTS2	INTS2	1096	YES	NO	NO	1	0.895409	0.508675	0.551485	0.310969	0.409805	0.0618327	0.926	0.415145	1.00572	-1.39135	2.4577	-0.955811	1.27519
IRAK4	Interleukin-1 receptor-associated kinase 4	Q9NWZ3	SANILLDEAFTAK	PKinase	Protein kinase domain	314	YES	YES	YES	1	0.97076	0.523382	0.455247	0.431062	0.393063	0.0879559	0.9952	0.425701	1.00117	-1.13841	6.47741	-1.25791	6.4493
IRAK4	Interleukin-1 receptor-associated kinase 4	Q9NWZ3	ISDFGLAR	PKinase	Protein kinase domain	327	YES	YES	YES	1	1.01921	0.586785	0.488624	0.509669	0.523956	0.147128	0.9974	0.507417	1.00961	-1.0218	4.9432	-1.10923	4.8571
IRAK4	Interleukin-1 receptor-associated kinase 4	Q9NWZ3	IVGTTAYMAPEALR	PKinase	Protein kinase domain	348	YES	YES	YES	1	1.0901	0.481462	0.493008	0.420161	0.486763	0.112199	0.9837	0.466631	1.04506	-1.17324	3.78431	-1.26126	4.1269
IRAK4	Interleukin-1 receptor-associated kinase 4	Q9NWZ3	FHSFSFYELK	Protein kinase-like (PK-like)	Protein kinase domain	165	YES	YES	YES	1	0.877731	0.587991	0.532072	0.417853	0.44496	0.0716923	0.9832	0.447999	1.00485	-1.21758	3.41844	-1.13366	3.85904
IRAK4	Interleukin-1 receptor-associated kinase 4	Q9NWZ3	NVTNNFDERPISVGGNK	Protein kinase-like (PK-like)	Protein kinase domain	175	YES	YES	YES	1	0.938142	0.498325	0.259166	0.282425	0.358289	0.108739	0.9887	0.298562	0.993345	-1.51278	3.60598	-1.48654	3.84164
IRAK4	Interleukin-1 receptor-associated kinase 4	Q9NWZ3	KVQQLLQEMTAS	Protein kinase-like (PK-like)	Protein kinase domain	449	YES	YES	YES	1	0.947851	0.406545	0.284916	0.383896	0.359523	0.0667976	0.9895	0.342949	0.999374	-1.67743	3.08702	-1.67762	3.77032
IRAK4	Interleukin-1 receptor-associated kinase 4	Q9NWZ3	MGEGGFGVVYK	PKinase	Protein kinase domain	192	YES	YES	YES	1	1.05737	0.744257	0.71204	0.755055	0.684417	0.129166	0.9675	0.717171	1.02869	-0.561414	2.72211	-0.651133	3.50284
IRAK4	Interleukin-1 receptor-associated kinase 4	Q9NWZ3	GYVNNTTVAVK	PKinase	Protein kinase domain	203	YES	YES	YES	1	1.13302	0.291618	0.274516	0.288077	0.352363	0.0661569	0.9843	0.30164	1.06652	-2.23873	3.16673	-1.85962	3.1607
JAK2	Tyrosine-protein kinase JAK2	O60674	IGALGFSGAFEDRDPTQFEER	Protein kinase-like (PK-like)	Protein kinase domain	827	YES	YES	YES	1	0.97009	0.743943	0.296338	0.428686	0.42084	0.217709	0.9751	0.381954	0.985058	-1.95138	1.71022	-1.4096	3.81254
JAK2	Tyrosine-protein kinase JAK2	O60674	NILVENENR	PKinase	Protein kinase domain	981	YES	YES	YES	1	0.890474	0.382445	0.338415	0.305916	0.274228	0.0561537	0.9963	0.304872	1.00049	-1.32444	2.79957	-1.44699	2.73921
KATNB1	Katanin p80 WD40 repeat-containing subunit B1	Q9BVA0	IPQQAELVDEDAMSQIR	unannotated	unannotated	476	YES	NO	NO	1	0.347048	0.39105	0.45049	0.141873	0.307716	0.0131434	0.9007	-0.191562	1.00014	-1.95421	2.01297	-1.17434	1.78842
KHDRBS1	KH domain-containing	Q07666	ASPATQPPPLLPPSATGPDATVGGPAPTPLLPPSATASVK	unannotated	unannotated	57	YES	NO	NO	1	1.06033	0.733383	0.634095	0.728625	0.57362	0.155288	0.9282	0.645445	1.03017	-0.685229	2.26057	-0.766671	1.9144
KRT19	Keratin	P08727	FGPGVAFR	unannotated	unannotated	25	NO	NO	NO	1	0.977949	1.07055	1.4504	1.49848	1.65589	0.808663	0.9734	0.983597	1.58903	0.671318	5.00155	0.716293	5.21563
LARP1	La-related protein 1	Q6PKG0	FQHPSHELLK	unannotated	unannotated	872	NO	NO	NO	1	1.0905	1.03897	1.25349	1.61392	1.67245	3.42639	0.99	1.03796	1.67764	0.773608	3.09654	0.913347	3.41433
LARP1	La-related protein 1	Q6PKG0	KVNMISR	unannotated	unannotated	711	NO	NO	NO	1	1.1195	1.15249	1.20596	1.19503	1.32494	0.689098	0.9065	0.997764	1.36723	0.393109	1.74697	0.389503	2.94152
LATS1	Serine/threonine-protein kinase LATS1	O95835	DILAEADNEWVVR	PKinase	Protein kinase domain	755	YES	YES	YES	1	1.08249	0.119168	0.231187	0.0450815	0.0999861	0.0715958	0.981	0.123831	1.04126	-4.42229	6.04882	-3.33305	4.56155
LATS1	Serine/threonine-protein kinase LATS1	O95835	CLAHSLVGTPNYIAPEVLLR	PKinase	Protein kinase domain	905	YES	YES	YES	1	0.774874	0.45902	0.361774	0.318919	0.285859	0.0470037	0.997	0.306947	1.00143	-1.11738	1.33799	-2.14616	3.40833
LATS1	Serine/threonine-protein kinase LATS1	O95835	TLGIGAFGEVCLAR	PKinase	Protein kinase domain	710	YES	YES	YES	1	0.726295	0.579339	0.321977	0.218076	0.222595	0.133459	0.9925	0.161395	0.995181	-2.65935	3.8827	-2.79586	3.16668
LIMK2	LIM domain kinase 2	P53671	FVPTDCPPAFFPLAAICCR	PKinase	Protein kinase domain	567	YES	YES	YES	1	1.13163	0.952449	0.371677	0.475602	0.183761	0.484091	0.9328	0.328798	1.06594	-1.13893	1.61656	-2.02969	2.72151
LIMK2	LIM domain kinase 2	P53671	LNLLTEYIEGGTLKDFLR	PKinase	Protein kinase domain	401	YES	YES	YES	1	0.910748	1.00683	0.685934	0.427657	0.510674	1.88835	0.9712	0.469162	0.972528	-1.00304	2.11823	-1.0505	2.37101
LSM4	U6 snRNA-associated Sm-like protein LSm4	Q9Y4Z0	MLPLSLLK	unannotated	unannotated	1	NO	NO	NO	1	1.03029	1.06095	1.15136	1.31952	1.35675	3.6182	0.9951	1.01224	1.39331	0.408911	2.40097	0.536495	2.87329
MACROH2A1	Core histone macro-H2A	O75367	AGVIFPVGR	Histone	Core histone H2A/H2B/H3/H4	19	NO	NO	NO	1	1.01224	1.08256	0.985793	1.23613	1.42615	19.3365	0.9636	1.02012	1.42717	0.305869	2.87983	0.523175	4.68806
MAP2K1	Dual specificity mitogen-activated protein kinase kinase 1	Q02750	ISELGAGNGGVVFK	PKinase	Protein kinase domain	71	YES	YES	YES	1	0.904185	0.719326	0.68282	0.677955	0.543415	0.107142	0.9279	0.584201	1.00622	-0.549617	3.26223	-0.779408	4.65317
MAP2K1	Dual specificity mitogen-activated protein kinase kinase 1	Q02750	DVKPSNILVNSR	PKinase	Protein kinase domain	190	YES	YES	YES	1	0.978828	0.929903	0.851076	0.753492	0.729982	1.85233	0.9985	0.698658	0.999275	-0.3453	3.60966	-0.466092	4.56207
MAP2K1	Dual specificity mitogen-activated protein kinase kinase 1	Q02750	KLIHLEIKPAIR	PKinase	Protein kinase domain	97	YES	YES	YES	1	1.06729	0.958475	0.840161	0.687933	0.671769	1.73614	0.974	0.655846	1.02968	-0.598717	2.75346	-0.731215	3.28736
MAP2K1	Dual specificity mitogen-activated protein kinase kinase 1	Q02750	YPIPPPDAK	PKinase	Protein kinase domain	261	NO	YES	YES	1	0.946385	2.03941	1.83725	2.21075	2.29637	0.113394	0.9332	0.973027	2.11483	1.48446	3.28572	1.28853	3.27842
MAP2K1	Dual specificity mitogen-activated protein kinase kinase 1	Q02750	QLMVHAFIK	Protein kinase-like (PK-like)	Protein kinase domain	354	NO	YES	YES	1	0.946618	1.56499	1.53169	1.51322	1.59237	0.0663227	0.9884	0.972946	1.5508	0.800012	3.03142	0.768522	2.97901
MAP2K1	Dual specificity mitogen-activated protein kinase kinase 1	Q02750	VSHKPSGLVMAR	PKinase	Protein kinase domain	85	YES	YES	YES	1	0.822619	0.71411	0.63907	0.58142	0.575449	0.0531875	0.9993	0.553746	1.00005	-0.715655	3.25711	-0.826894	2.69575
MAP2K1	Dual specificity mitogen-activated protein kinase kinase 1	Q02750	IPEQILGK	PKinase	Protein kinase domain	161	YES	YES	YES	1	0.913147	0.871567	0.746963	0.601336	0.336275	82.688	0.9841	-0.204255	0.977531	-0.896099	1.4642	-1.22322	2.69413
MAP2K1	Dual specificity mitogen-activated protein kinase kinase 1	Q02750	VGELKDDDFEKISELGAGNGGVVFK	Protein kinase-like (PK-like)	Protein kinase domain	60	YES	YES	YES	1	0.839732	0.947948	0.612593	0.372736	0.196875	4.98537	0.9617	0.100766	0.959126	-1.86922	3.20695	-2.07932	2.48011
MAP2K1	Dual specificity mitogen-activated protein kinase kinase 1	Q02750	LCDFGVSGQLIDSMANSFVGTR	PKinase	Protein kinase domain	206	YES	YES	YES	1	1.00084	1.01101	1.01067	0.797459	0.747845	13.1067	0.9985	0.747626	1.00574	-0.232672	1.76803	-0.324502	2.44426
MAP2K1	Dual specificity mitogen-activated protein kinase kinase 1	Q02750	LIHLEIKPAIR	PKinase	Protein kinase domain	98	YES	YES	YES	1	0.88678	0.749806	0.780663	0.686786	0.564269	31.1429	0.9323	0.278607	0.999456	-0.441421	1.70955	-0.929189	2.10785
MAP2K2	Dual specificity mitogen-activated protein kinase kinase 2	P36507	VGELKDDDFER	Protein kinase-like (PK-like)	Protein kinase domain	64	YES	YES	YES	1	0.972716	0.914404	0.769915	0.695937	0.632208	1.24673	0.9944	0.618027	1.00183	-0.458376	3.99829	-0.601737	4.53993
MAP2K2	Dual specificity mitogen-activated protein kinase kinase 2	P36507	SEVEEVDFAGWLCK	Protein kinase-like (PK-like)	Protein kinase domain	372	NO	YES	YES	1	1.13248	1.36927	1.46434	1.478	1.58864	0.0824744	0.9754	0.995332	1.5396	0.503129	3.47636	0.598579	3.94463
MAP2K2	Dual specificity mitogen-activated protein kinase kinase 2	P36507	ISELGAGNGGVVTK	PKinase	Protein kinase domain	75	YES	YES	YES	1	0.966427	0.857851	0.740664	0.68771	0.642662	0.41639	0.9953	0.643189	1.00445	-0.478231	4.29395	-0.565732	3.90828
MAP2K2	Dual specificity mitogen-activated protein kinase kinase 2	P36507	RSEVEEVDFAGWLCK	Protein kinase-like (PK-like)	Protein kinase domain	371	NO	YES	YES	1	1.00648	1.3271	1.32669	1.23103	1.33309	0.045162	0.9435	0.998582	1.3046	0.422262	2.90745	0.525269	3.67382
MAP2K2	Dual specificity mitogen-activated protein kinase kinase 2	P36507	VQHRPSGLIMAR	PKinase	Protein kinase domain	89	YES	YES	YES	1	1.05712	0.938771	0.892519	0.818857	0.747776	4.03643	0.9308	0.70706	1.02455	-0.28669	2.26851	-0.404806	2.93406
MAP2K2	Dual specificity mitogen-activated protein kinase kinase 2	P36507	AKVGELKDDDFER	Protein kinase-like (PK-like)	Protein kinase domain	62	YES	YES	YES	1	1.0386	0.766241	0.691632	0.556068	0.455436	0.811369	0.9455	0.439691	1.03092	-0.821337	2.62534	-0.896457	2.76773
MAP2K2	Dual specificity mitogen-activated protein kinase kinase 2	P36507	MLTNHTFIK	Protein kinase-like (PK-like)	Protein kinase domain	362	NO	YES	YES	1	1.04376	1.03614	1.10594	1.36943	1.26898	2.61299	0.9441	1.02663	1.31926	0.383706	1.62757	0.424778	2.75055
MAP3K4	Mitogen-activated protein kinase kinase kinase 4	Q9Y6R4	GANIFLTSSGLIK	PKinase	Protein kinase domain	1466	YES	YES	YES	1	0.804118	0.940066	0.863304	0.473196	0.384451	7.93844	0.9377	0.376314	0.914846	-1.08927	5.6619	-1.35026	6.69365
MAP3K4	Mitogen-activated protein kinase kinase kinase 4	Q9Y6R4	LGDFGCSVK	PKinase	Protein kinase domain	1479	YES	YES	YES	1	0.958381	0.868955	0.899002	0.399129	0.380848	5.34043	0.9777	0.379932	0.942671	-1.17889	5.13651	-1.3443	5.59003
MAP3K4	Mitogen-activated protein kinase kinase kinase 4	Q9Y6R4	TIKETADELK	PKinase	Protein kinase domain	1383	YES	YES	YES	1	1.06929	0.877224	0.819719	0.431543	0.314126	6.88143	0.9719	0.199249	1.01498	-1.01386	3.01018	-1.45762	3.8503
MAP3K4	Mitogen-activated protein kinase kinase kinase 4	Q9Y6R4	WTASQLLDHSFVK	Protein kinase-like (PK-like)	Protein kinase domain	1590	YES	YES	YES	1	0.963083	1.2413	1.00264	0.398974	0.332517	6.45765	0.9324	0.331349	1.0672	-1.31704	3.02132	-1.53699	3.09901
MAP3K4	Mitogen-activated protein kinase kinase kinase 4	Q9Y6R4	QITIAINVLHEHGIVHR	PKinase	Protein kinase domain	1446	YES	YES	YES	1	1.14374	1.30415	0.99923	0.473689	0.485928	2.76764	0.9221	0.479624	1.14934	-1.49524	2.39068	-1.53873	2.17934
MAP3K7	Mitogen-activated protein kinase kinase kinase 7	O43318	EIEVEEVVGR	Protein kinase-like (PK-like)	Protein kinase domain	35	YES	YES	YES	1	0.920643	0.773711	0.191837	0.052561	0.0575026	0.542005	0.9977	0.048966	0.969222	-4.01609	5.84186	-4.4695	6.22331
MAP3K7	Mitogen-activated protein kinase kinase kinase 7	O43318	KAFIVELR	PKinase	Protein kinase domain	72	YES	YES	YES	1	1.04594	1.05719	0.475679	0.0451835	0.166806	1.84635	0.9914	0.105987	1.03438	-4.15666	4.90409	-2.82751	5.26764
MAP3K7	Mitogen-activated protein kinase kinase kinase 7	O43318	NLPKPIESLMTR	PKinase	Protein kinase domain	254	YES	YES	YES	1	1.1442	0.92938	0.253333	0.0544576	0.0698437	0.730315	0.9908	0.0589608	1.07144	-3.85078	6.1902	-4.04307	5.17854
MAP3K7	Mitogen-activated protein kinase kinase kinase 7	O43318	AFIVELR	PKinase	Protein kinase domain	73	YES	YES	YES	1	1.00613	0.920629	0.810027	0.68731	0.728106	0.777822	0.9779	0.70084	1.00612	-0.422306	2.82021	-0.353349	2.59694
MAP4K5	Mitogen-activated protein kinase kinase kinase kinase 5	Q9Y4K4	GANILLTDHGDVK	PKinase	Protein kinase domain	143	YES	YES	YES	1	1.07555	0.540626	0.359141	0.27348	0.190818	0.173287	0.9763	0.274452	1.03782	-1.98958	4.42373	-2.21719	3.79713
MAP4K5	Mitogen-activated protein kinase kinase kinase kinase 5	Q9Y4K4	LLTHTFVAQPGLSR	Protein kinase-like (PK-like)	Protein kinase domain	271	YES	YES	YES	1	0.849769	0.722303	0.526316	0.492664	0.572814	0.0893878	0.9654	0.51702	0.992704	-1.10532	3.45321	-1.13282	2.99305
MAPK1	Mitogen-activated protein kinase 1	P28482	AAAAAAGAGPEMVR	Protein kinase-like (PK-like)	Protein kinase domain	2	YES	YES	YES	1	1.07868	1.00843	0.967842	0.742799	0.60393	13.9194	0.9793	0.538121	1.03289	-0.429862	4.23432	-0.730083	6.07137
MAPK1	Mitogen-activated protein kinase 1	P28482	DLKPSNLLLNTTCDLK	PKinase	Protein kinase domain	149	YES	YES	YES	1	0.933194	0.950578	1.01905	0.778396	0.49816	21.6439	0.975	0.497644	0.975708	-0.220723	1.04115	-0.849873	3.88916
MAPK1	Mitogen-activated protein kinase 1	P28482	NYLLSLPHK	PKinase	Protein kinase domain	262	NO	YES	YES	1	0.963308	1.04616	1.32415	1.45342	1.5107	1.10058	0.994	0.97874	1.49569	0.706832	3.54179	0.674553	3.57692
MAPK1	Mitogen-activated protein kinase 1	P28482	NKVPWNR	PKinase	Protein kinase domain	271	NO	YES	YES	1	1.07551	1.10573	1.34112	1.81918	1.56573	2.1473	0.9263	1.06003	1.69259	0.751092	4.524	0.520862	2.96215
MAPK10	Mitogen-activated protein kinase 10	P53779	DLKPSNIVVK	PKinase	Protein kinase domain	189	YES	YES	YES	1	1.14534	0.807375	0.43058	0.234276	0.0762994	0.859777	0.9721	0.105505	1.07765	-2.82362	3.00714	-4.10858	5.79778
MAPK10	Mitogen-activated protein kinase 10	P53779	NIISLLNVFTPQK	PKinase	Protein kinase domain	122	YES	YES	YES	1	0.81911	0.852996	0.320126	0.14893	0.162307	0.9006	0.9778	0.152449	0.912809	-2.4968	2.97509	-2.39683	3.19459
MAPK14	Mitogen-activated protein kinase 14	Q16539	TLFPGTDHIDQLK	PKinase	Protein kinase domain	221	YES	YES	YES	1	0.855849	0.844269	0.796582	0.560395	0.43523	42.7167	0.9645	0.0540265	0.968062	-0.573241	1.42058	-1.19709	3.5546
MAPK3	Mitogen-activated protein kinase 3	P27361	DLKPSNLLINTTCDLK	PKinase	Protein kinase domain	166	YES	YES	YES	1	0.936232	0.953626	1.01273	0.777955	0.485646	21.7184	0.9804	0.485304	0.975648	-0.231666	1.14691	-0.878357	3.96369
MAPK8	Mitogen-activated protein kinase 8	P45983	NIIGLLNVFTPQK	PKinase	Protein kinase domain	84	YES	YES	YES	1	0.945653	0.763406	0.26749	0.209528	0.11892	0.454608	0.9947	0.15489	0.985008	-1.55636	1.82504	-2.41075	2.9062
MAPK8	Mitogen-activated protein kinase 8	P45983	YAGYSFEK	PKinase	Protein kinase domain	266	YES	YES	YES	1	0.978212	0.850657	0.628048	0.404161	0.538128	0.637987	0.9598	0.467684	0.996504	-1.09161	1.946	-0.996008	2.55088
MAPK9	Mitogen-activated protein kinase 9	P45984	TACTNFMMTPYVVTR	PKinase	Protein kinase domain	175	YES	YES	YES	1	0.489682	0.52812	0.430245	0.216814	0.128431	9.28564	0.963	-0.437179	0.996086	-2.6253	3.13757	-3.03617	5.27789
MARCKSL1	MARCKS-related protein	P49006	LSGLSFKR	MARCKS	MARCKS	100	NO	NO	NO	1	1.30855	1.61714	1.90481	1.72641	1.9002	0.0451723	0.9583	1.00359	1.85203	0.602666	2.5763	0.740922	3.13302
MARK3	MAP/microtubule affinity-regulating kinase 3	P27448	LFEVIETEK	PKinase	Protein kinase domain	118	YES	YES	YES	1	0.104912	0.14116	0.101968	0.176307	0.31322	33294.5	0.9503	0.999691	-0.671825	-2.55071	3.75335	-1.6694	2.77107
MARS1	Methionine--tRNA ligase	P56192	GFVLQDTVEQLR	HUP	tRNA synthetases class I (M)	377	NO	NO	NO	1	0.96015	1.00433	0.924551	1.24801	1.33938	15.048	0.971	0.972208	1.33937	0.317722	2.85647	0.461526	4.69898
MARS1	Methionine--tRNA ligase	P56192	SCPVVQSSQHLFLDLPK	HUP	tRNA synthetases class I (M)	440	NO	NO	NO	1	1.0109	1.01052	0.954806	1.21272	1.43465	20.148	0.9875	0.99403	1.43665	0.306145	2.80881	0.459815	4.36853
MARS1	Methionine--tRNA ligase	P56192	ITQDIFQQLLK	HUP	tRNA synthetases class I (M)	365	NO	NO	NO	1	0.949843	1.03445	0.969888	1.19604	1.30011	16.392	0.9588	0.988471	1.30056	0.341366	2.8848	0.404998	3.76094
MARS1	Methionine--tRNA ligase	P56192	RLEEWLGR	HUP	tRNA synthetases class I (M)	460	NO	NO	NO	1	1.08201	1.06563	1.14641	1.26326	1.26807	1.89438	0.9478	1.01463	1.31112	0.249966	1.97619	0.335505	2.53849
MARS1	Methionine--tRNA ligase	P56192	SRGVGVFGDMAQDTGIPADIWR	HUP	tRNA synthetases class I (M)	597	YES	NO	NO	1	0.845689	0.816702	0.82374	0.785012	0.698603	5.45322	0.9338	0.555402	0.999662	-0.257204	1.56899	-0.408984	2.06265
MARS1	Methionine--tRNA ligase	P56192	GVGVFGDMAQDTGIPADIWR	HUP	tRNA synthetases class I (M)	599	NO	NO	NO	1	0.95983	0.888745	0.848443	1.22534	1.29395	14.9084	0.9158	0.924257	1.29418	0.401285	2.34054	0.529836	1.95634
MASTL	Serine/threonine-protein kinase greatwall	Q96GX5	ILGTPDYLAPELLLGR	PKinase	Protein kinase domain	738	YES	YES	YES	1	0.909174	0.957987	0.732678	0.45754	0.321773	5.43128	0.9866	0.25802	0.972675	-1.14929	4.32472	-1.62254	5.69279
MASTL	Serine/threonine-protein kinase greatwall	Q96GX5	IAVPKPPSIEEFSIVKPISR	Protein kinase-like (PK-like)	Protein kinase domain	24	YES	YES	YES	1	0.941371	0.895278	0.745388	0.279997	0.131446	6.26063	0.9955	0.0618276	0.962214	-1.66629	4.22146	-2.66676	3.98851
MPDZ	Multiple PDZ domain protein	O75970	ERYGTLTGELHMIELEK	unannotated	unannotated	1339	NO	NO	NO	1	0.904952	0.924345	1.30078	1.36815	1.3063	1.13727	0.9693	0.942993	1.33732	0.604887	2.18744	0.718355	1.61154
MYBBP1A	Myb-binding protein 1A	Q9BQG0	LLGAALPLLTK	DNA_pol_phi	DNA_pol_phi	308	NO	NO	NO	1	1.02029	1.00322	1.01799	1.33842	1.25506	3.90393	0.9671	1.00773	1.29678	0.327834	2.52233	0.375812	3.14948
MYBBP1A	Myb-binding protein 1A	Q9BQG0	DRKLPAIALDLLR	DNA_pol_phi	DNA_pol_phi	261	NO	NO	NO	1	1.03946	1.00462	1.00277	1.13201	1.29729	22.6013	0.985	1.01165	1.30165	0.190185	1.34739	0.346111	2.94092
MYBBP1A	Myb-binding protein 1A	Q9BQG0	KLVGSVNLFSDENVPR	DNA_pol_phi	DNA_pol_phi	231	NO	NO	NO	1	1.02011	0.998436	1.05034	1.16714	1.36415	38.7048	0.9928	1.00899	1.49901	0.201827	1.28431	0.330403	2.14853
MYLK3	Myosin light chain kinase 3	Q32MK0	ETSISAGYEVCQHEVLGGGR	Protein kinase-like (PK-like)	Protein kinase domain	506	YES	YES	YES	1	1.03051	0.715784	0.434566	0.519561	0.507941	0.189768	0.9861	0.487356	1.01525	-0.933056	4.10135	-1.0952	4.21864
MYLK3	Myosin light chain kinase 3	Q32MK0	IIDFGLAR	PKinase	Protein kinase domain	654	YES	YES	YES	1	0.965754	0.747327	0.540025	0.5778	0.483383	0.178671	0.982	0.52593	0.998077	-0.917467	3.69655	-1.23885	3.48805
NAP1L1	Nucleosome assembly protein 1-like 1	P55209	YAVLYQPLFDKR	NAP	NAP	106	NO	NO	NO	1	1.04646	0.981236	1.10548	1.13491	1.34868	38.6655	0.909	1.02117	1.45861	0.155293	0.923925	0.305214	2.03312
NDOR1	NADPH-dependent diflavin oxidoreductase 1	Q9UHB4	LRELGSLVWELLDR	NAD_Ferredoxin	Oxidoreductase NAD-binding domain	528	NO	NO	NO	1	1.22794	1.14051	1.0725	2.64362	4.02037	19.4785	0.9962	1.11017	4.02489	1.4495	2.60977	1.75777	3.25278
NEK9	Serine/threonine-protein kinase Nek9	Q8TD19	TLNIFLTK	PKinase	Protein kinase domain	179	YES	YES	YES	1	0.971114	1.08757	0.883678	0.557325	0.334609	12.8608	0.9771	0.242724	1.01845	-0.842633	4.7124	-1.45829	6.24349
NEK9	Serine/threonine-protein kinase Nek9	Q8TD19	AGGGAAEQEELHYIPIR	Protein kinase-like (PK-like)	Protein kinase domain	40	YES	YES	YES	1	1.003	1.02276	1.00555	0.703434	0.562428	14.77	0.9985	0.558326	1.00866	-0.505396	3.98555	-0.871062	5.55331
NEK9	Serine/threonine-protein kinase Nek9	Q8TD19	TFDATNPLNLCVK	PKinase	Protein kinase domain	250	YES	YES	YES	1	0.999192	1.03706	0.959752	0.703796	0.55417	13.2575	0.9942	0.513085	1.01198	-0.440215	3.89813	-0.7794	5.34984
NEK9	Serine/threonine-protein kinase Nek9	Q8TD19	GAFGEATLYR	PKinase	Protein kinase domain	61	YES	YES	YES	1	0.939846	1.01789	0.996781	0.79745	0.557032	21.2352	0.9788	0.555998	0.988642	-0.436115	3.00066	-0.832148	4.02125
NEK9	Serine/threonine-protein kinase Nek9	Q8TD19	LGDYGLAK	PKinase	Protein kinase domain	192	YES	YES	YES	1	0.951962	0.911559	1.09589	0.53982	0.232639	18.57	0.9657	0.23251	0.989854	-0.916127	3.32274	-1.9589	3.49805
NEK9	Serine/threonine-protein kinase Nek9	Q8TD19	VTLLNAPTKRPR	Protein kinase-like (PK-like)	Protein kinase domain	319	YES	YES	YES	1	1.13235	1.20006	1.03732	0.660412	0.559691	7.69396	0.9377	0.550342	1.10945	-0.58928	3.10758	-0.804429	3.33564
NENF	Neudesin	Q9UMX5	LFTEEELAR	unannotated	unannotated	46	YES	NO	NO	1	0.835939	0.947508	0.848703	0.71748	0.50606	77.4023	0.9073	0.155509	0.932081	-0.300172	1.27342	-0.729838	2.2882
NOLC1	Nucleolar and coiled-body phosphoprotein 1	Q14978	GGSISVQVNSIKFDSE	unannotated	unannotated	684	NO	NO	NO	1	1.01585	1.08827	1.3756	1.35591	1.33323	0.292439	0.9933	1.0078	1.35515	0.424169	3.09456	0.424837	2.81223
NOLC1	Nucleolar and coiled-body phosphoprotein 1	Q14978	GGSISVQVNSIK	SRP40_C	SRP40_C	684	NO	NO	NO	1	1.06155	0.983505	1.30744	1.36731	1.25705	0.879678	0.9325	1.01494	1.31268	0.511367	2.19354	0.541883	2.17292
NSUN2	RNA cytosine C(5)-methyltransferase NSUN2	Q08J23	FHQFLVSETESGNISR	unannotated	unannotated	145	YES	NO	NO	1	0.94337	0.936473	0.823863	0.754195	0.653189	26.4584	0.9852	0.451694	0.996916	-0.41376	3.69599	-0.586749	4.12496
NSUN2	RNA cytosine C(5)-methyltransferase NSUN2	Q08J23	NNSGEEFDCAFR	unannotated	unannotated	591	YES	NO	NO	1	1.02674	0.984023	0.889928	0.805657	0.69376	23.3473	0.9817	0.545543	1.01752	-0.318384	3.7527	-0.509546	4.08225
NSUN2	RNA cytosine C(5)-methyltransferase NSUN2	Q08J23	LSSPCIMVVNHDASSIPR	NADP_Rossmann	16S rRNA methyltransferase RsmB/F	231	YES	NO	NO	1	1.00974	1.0004	0.88966	0.784394	0.675357	14.6155	0.9882	0.573127	1.01286	-0.347819	3.3581	-0.534297	3.98602
NSUN2	RNA cytosine C(5)-methyltransferase NSUN2	Q08J23	LQIDVDGRK	NADP_Rossmann	16S rRNA methyltransferase RsmB/F	249	YES	NO	NO	1	0.922959	0.841645	0.792774	0.744568	0.68512	1.50757	0.9901	0.60051	1.00166	-0.426632	3.76819	-0.590656	3.44357
NSUN2	RNA cytosine C(5)-methyltransferase NSUN2	Q08J23	ILCDVPCSGDGTMR	NADP_Rossmann	16S rRNA methyltransferase RsmB/F	265	YES	NO	NO	1	0.982141	0.93598	0.891509	0.790863	0.615378	111.406	0.9866	0.245218	0.987894	-0.323892	2.96056	-0.569669	3.21643
NSUN2	RNA cytosine C(5)-methyltransferase NSUN2	Q08J23	CYLLVHQAK	NADP_Rossmann	16S rRNA methyltransferase RsmB/F	221	YES	NO	NO	1	0.973493	0.906288	0.862063	0.762939	0.62398	57.9283	0.9849	0.351494	0.994704	-0.309318	2.32312	-0.544187	3.10959
NSUN2	RNA cytosine C(5)-methyltransferase NSUN2	Q08J23	LAQEGIYTLYPFINSR	unannotated	unannotated	603	YES	NO	NO	1	0.991966	0.975203	0.928792	0.811805	0.684172	64.7271	0.9997	0.441424	0.997835	-0.194553	1.30787	-0.42708	2.97104
NSUN2	RNA cytosine C(5)-methyltransferase NSUN2	Q08J23	WTTLNSLQLHGLQLR	NADP_Rossmann	16S rRNA methyltransferase RsmB/F	287	YES	NO	NO	1	0.954884	0.903922	0.866411	0.782013	0.620755	55.5695	0.9679	0.378419	0.982953	-0.30835	2.30597	-0.520234	2.78561
NSUN2	RNA cytosine C(5)-methyltransferase NSUN2	Q08J23	ILCDVPCSGDGTMRK	NADP_Rossmann	16S rRNA methyltransferase RsmB/F	265	YES	NO	NO	1	1.01188	0.861265	0.862399	0.709264	0.657413	6.56063	0.9399	0.536875	1.01031	-0.450364	2.47981	-0.536066	2.73518
NSUN2	RNA cytosine C(5)-methyltransferase NSUN2	Q08J23	EILFYDR	NADP_Rossmann	16S rRNA methyltransferase RsmB/F	258	YES	NO	NO	1	0.947595	0.922017	0.843958	0.793989	0.608216	72.0965	0.9558	0.332236	0.982551	-0.305008	1.66087	-0.548126	2.7228
NSUN2	RNA cytosine C(5)-methyltransferase NSUN2	Q08J23	TTQLIEMLHADMNVPFPEGFVIANDVDNKR	NADP_Rossmann	16S rRNA methyltransferase RsmB/F	191	YES	NO	NO	1	0.919839	1.05535	0.679212	0.456488	0.640106	1.68964	0.9057	0.548296	0.991732	-0.859113	1.60199	-0.620299	2.49303
NSUN2	RNA cytosine C(5)-methyltransferase NSUN2	Q08J23	ILLTQENPFFR	unannotated	unannotated	629	YES	NO	NO	1	0.919159	0.953768	0.875548	0.840422	0.661808	94.4243	0.9166	0.40213	0.957731	-0.202244	1.02506	-0.440021	2.47999
NSUN2	RNA cytosine C(5)-methyltransferase NSUN2	Q08J23	ILDMCAAPGSK	NADP_Rossmann	16S rRNA methyltransferase RsmB/F	180	YES	NO	NO	1	1.01906	0.907584	0.963092	0.853555	0.701723	110.296	0.9051	0.405474	0.983829	-0.256492	2.42666	-0.451041	2.46956
NSUN2	RNA cytosine C(5)-methyltransferase NSUN2	Q08J23	MMGLEVLGEK	unannotated	unannotated	701	YES	NO	NO	1	0.940595	0.882318	0.92113	0.788289	0.71534	30.8999	0.9061	0.559917	0.984154	-0.193465	0.981978	-0.43378	2.45085
NSUN2	RNA cytosine C(5)-methyltransferase NSUN2	Q08J23	VINTGIK	unannotated	unannotated	580	YES	NO	NO	1	0.93765	0.973403	0.937799	0.775747	0.748395	6.10355	0.9653	0.745885	0.970657	-0.428281	1.65295	-0.647319	2.149
NUDC	Nuclear migration protein nudC	Q9Y266	LKPNLGNGADLPNYR	unannotated	unannotated	159	YES	NO	NO	1	0.962841	1.02243	1.07355	0.96616	0.689257	36.0563	0.9296	0.674561	1.01475	-0.0938752	0.548988	-0.580089	4.02273
NUP188	Nucleoporin NUP188	Q5SRE5	LAFSVTNNVIR	Nucleoporin_A	Nucleoporin subcomplex protein binding to Pom34	816	NO	NO	NO	1	0.778468	1.04722	1.35302	1.87107	1.6273	1.95066	0.9175	0.940014	1.7498	0.947627	2.55342	0.996591	2.56823
OSBP	Oxysterol-binding protein 1	P22059	FVPYSYFSR	Oxysterol_BP	Oxysterol_BP	613	NO	NO	NO	1	0.861879	0.76448	1.10511	2.164	2.33737	5.86114	0.9877	0.875592	2.34838	1.05093	5.07572	1.21252	6.77219
OSBP	Oxysterol-binding protein 1	P22059	ATEDGTPYDPYKALWFER	Oxysterol_BP	Oxysterol_BP	757	NO	NO	NO	1	0.815574	0.737161	1.11253	1.88263	2.38811	13.2274	0.9798	0.852653	2.57938	1.06316	3.79378	1.36903	4.93868
OSBP	Oxysterol-binding protein 1	P22059	LTEDLEYHELLDR	Oxysterol_BP	Oxysterol_BP	450	NO	NO	NO	1	1.04429	0.96886	1.07567	1.70039	1.86684	8.85544	0.9962	1.0044	1.88231	0.667448	4.03668	0.799378	4.64774
OSBP	Oxysterol-binding protein 1	P22059	TRIPYKPNYSLNLWSIMK	unannotated	unannotated	407	NO	NO	NO	1	1.20144	0.921213	1.31173	2.02493	3.40613	96.1157	0.9876	1.04926	5.67564	1.43641	2.7054	2.02865	4.53545
OSBP	Oxysterol-binding protein 1	P22059	VTTTVHNIIVGK	Oxysterol_BP	Oxysterol_BP	578	NO	NO	NO	1	1.09494	1.27087	1.14548	2.5132	4.97555	29.2376	0.9969	1.12099	5.35727	1.68449	2.79376	2.40412	4.07973
OSBP	Oxysterol-binding protein 1	P22059	IPYKPNYSLNLWSIMK	unannotated	unannotated	409	NO	NO	NO	1	0.907796	0.862192	1.00709	1.70452	2.44505	24.2643	0.9947	0.924503	2.70114	1.04985	2.64169	1.52918	3.88262
OSBP	Oxysterol-binding protein 1	P22059	ELSKIPMPVNFNEPLSMLQR	Oxysterol_BP	Oxysterol_BP	430	NO	NO	NO	1	0.917594	0.778184	0.955001	1.60491	1.90381	12.6144	0.9749	0.900191	1.93727	0.719872	2.87744	0.932552	3.53348
OSBP	Oxysterol-binding protein 1	P22059	LWIDQSGEIDIVNHK	Oxysterol_BP	Oxysterol_BP	590	NO	NO	NO	1	0.936815	0.777537	1.07285	1.74976	2.10198	11.3733	0.9787	0.907754	2.18749	0.839491	3.05136	1.09452	3.4491
OSBP	Oxysterol-binding protein 1	P22059	KVTTTVHNIIVGK	Oxysterol_BP	Oxysterol_BP	577	NO	NO	NO	1	0.727124	0.659003	0.844729	1.99891	2.34795	11.1597	0.975	0.796109	2.36561	1.37298	2.3233	1.61589	2.81097
OSBPL2	Oxysterol-binding protein-related protein 2	Q9H1P3	MQSVAAFAVSAVASQWER	Oxysterol_BP	Oxysterol_BP	130	NO	NO	NO	1	1.12369	0.879566	1.11918	2.00939	2.14377	6.73713	0.9799	1.00176	2.1504	1.10422	3.21368	1.08784	3.11539
OSBPL2	Oxysterol-binding protein-related protein 2	Q9H1P3	GTITLELLK	Oxysterol_BP	Oxysterol_BP	217	NO	NO	NO	1	1.08873	1.2762	1.70721	2.35978	2.63447	4.72486	0.9996	1.00928	2.91256	1.13941	2.55337	1.13702	2.88557
OSBPL2	Oxysterol-binding protein-related protein 2	Q9H1P3	TSLPAPMFSR	unannotated	unannotated	62	NO	NO	NO	1	0.974005	0.965384	1.26866	1.5995	1.49192	1.97908	0.9836	0.979778	1.54573	0.416119	1.19473	0.597916	2.83883
OSBPL3	Oxysterol-binding protein-related protein 3	Q9H4L5	YWSTNAHEIEGTVFDR	Oxysterol_BP	Oxysterol_BP	727	YES	NO	NO	1	0.990451	0.808172	0.471404	0.47357	0.308693	0.422149	0.9717	0.377064	1.00903	-1.40855	2.93155	-1.66735	4.33681
OSBPL3	Oxysterol-binding protein-related protein 3	Q9H4L5	VTSCIHNILSGQR	Oxysterol_BP	Oxysterol_BP	686	YES	NO	NO	1	0.841222	0.672163	0.431098	0.308727	0.161491	0.912238	0.995	0.0565417	1.00312	-1.84611	4.53113	-2.33418	3.78794
OSBPL3	Oxysterol-binding protein-related protein 3	Q9H4L5	WIEHYGEIVIK	Oxysterol_BP	Oxysterol_BP	699	YES	NO	NO	1	1.01129	0.767688	0.428997	0.272108	0.174818	0.638209	0.9938	0.186815	1.0252	-1.60194	2.5014	-2.25075	3.32522
OSBPL3	Oxysterol-binding protein-related protein 3	Q9H4L5	LDHPVLW	unannotated	unannotated	881	YES	NO	NO	1	1.15147	0.757211	0.611688	0.44551	0.509487	0.186836	0.9351	0.522218	1.07574	-1.65393	2.59336	-1.21898	3.28298
OSBPL3	Oxysterol-binding protein-related protein 3	Q9H4L5	FLEEGNLEEAEIQK	Oxysterol_BP	Oxysterol_BP	816	YES	NO	NO	1	1.21038	0.893153	0.446707	0.368116	0.285372	0.478938	0.961	0.327033	1.10414	-1.43393	3.13325	-1.75108	3.15437
OSBPL3	Oxysterol-binding protein-related protein 3	Q9H4L5	KSDDDSWVSNGTYLELR	Oxysterol_BP	Oxysterol_BP	857	YES	NO	NO	1	0.939193	0.88211	0.326604	0.362337	0.425181	0.274274	0.9863	0.371372	0.969598	-1.13523	2.69814	-1.26297	2.67226
OSBPL6	Oxysterol-binding protein-related protein 6	Q9BZF3	FAIELNELDPVLK	Oxysterol_BP	Oxysterol_BP	831	YES	NO	NO	1	0.964116	0.633628	0.565955	0.440529	0.440117	0.111908	0.9725	0.468009	1.01484	-1.04536	3.61292	-1.22402	3.87328
OSBPL6	Oxysterol-binding protein-related protein 6	Q9BZF3	AGSKPFNPVLGETYECIR	Oxysterol_BP	Oxysterol_BP	643	YES	NO	NO	1	1.01816	0.731748	0.439629	0.379283	0.269204	0.329746	0.9853	0.315449	1.02797	-1.46027	5.8823	-2.23901	3.86902
OSBPL6	Oxysterol-binding protein-related protein 6	Q9BZF3	NFVFWQDIR	Oxysterol_BP	Oxysterol_BP	687	YES	NO	NO	1	1.13865	0.762959	0.650344	0.667039	0.574108	0.169137	0.9412	0.630492	1.06932	-0.739375	3.40151	-0.985437	3.80658
OSBPL6	Oxysterol-binding protein-related protein 6	Q9BZF3	FLEEGNLEAAASEK	Oxysterol_BP	Oxysterol_BP	859	YES	NO	NO	1	1.02909	0.970042	0.684166	0.736302	0.554343	0.624973	0.9132	0.643029	1.0155	-0.693543	2.14297	-0.793461	3.04552
OSBPL6	Oxysterol-binding protein-related protein 6	Q9BZF3	AGSKPFNPVLGETYECIREDK	Oxysterol_BP	Oxysterol_BP	643	YES	NO	NO	1	0.958484	0.737763	0.33006	0.363963	0.256377	0.285117	0.9887	0.305548	0.985957	-2.31	2.03947	-1.88948	2.78413
OSBPL9	Oxysterol-binding protein-related protein 9	Q96SU4	SVIMHLLSQVR	unannotated	unannotated	373	NO	NO	NO	1	1.02294	0.991441	1.09362	1.35731	1.53055	13.8099	0.9964	1.00226	1.61167	0.530915	3.61606	0.682879	4.80189
OSBPL9	Oxysterol-binding protein-related protein 9	Q96SU4	VVLPTFILER	Oxysterol_BP	Oxysterol_BP	391	NO	NO	NO	1	0.97211	0.941188	1.07873	1.25836	1.32269	4.74927	0.9791	0.970114	1.3272	0.493784	2.55203	0.469724	3.0351
OSBPL9	Oxysterol-binding protein-related protein 9	Q96SU4	VVLPTFILERR	Oxysterol_BP	Oxysterol_BP	391	NO	NO	NO	1	0.996017	0.938091	1.11324	1.33538	1.29982	2.24166	0.9785	0.978035	1.31767	0.394761	2.27321	0.363165	2.08486
OXSR1	Serine/threonine-protein kinase OSR1	O95747	LLSGGSVLDIIK	PKinase	Protein kinase domain	94	YES	YES	YES	1	0.864135	0.786973	0.712303	0.513406	0.417238	35.3454	0.9927	-0.0164405	0.994342	-0.959452	3.63506	-1.27313	4.41915
OXSR1	Serine/threonine-protein kinase OSR1	O95747	EVLEGLEYLHK	PKinase	Protein kinase domain	129	YES	YES	YES	1	1.02769	1.05186	0.924255	0.760107	0.732386	2.90496	0.9825	0.739916	1.02702	-0.419791	3.97003	-0.469077	4.19414
OXSR1	Serine/threonine-protein kinase OSR1	O95747	CQTSMDELLK	PKinase	Protein kinase domain	53	YES	YES	YES	1	0.934156	1.00954	0.837472	0.654586	0.528099	8.56891	0.9713	0.465182	0.986747	-0.669044	1.99967	-0.695028	2.15491
P4HB	Protein disulfide-isomerase	P07237	LAKVDATEESDLAQQYGVR	Thioredoxin	Thioredoxin	79	NO	NO	NO	1	0.993697	1.05018	0.992653	1.38693	1.57024	16.5772	0.9927	1.00909	1.5708	0.397911	3.50893	0.573384	4.549
P4HB	Protein disulfide-isomerase	P07237	ALAPEYAK	Thioredoxin	Thioredoxin	58	NO	NO	NO	1	1.04451	1.0166	1.07658	1.46111	1.58424	9.11886	0.9969	1.01968	1.60091	0.522282	4.07804	0.652461	4.47345
P4HB	Protein disulfide-isomerase	P07237	VDATEESDLAQQYGVR	Thioredoxin	Thioredoxin	82	NO	NO	NO	1	0.979851	0.857649	0.988785	1.38718	1.54148	11.0733	0.9673	0.94708	1.55829	0.515881	3.30812	0.674484	4.15459
P4HB	Protein disulfide-isomerase	P07237	KSNFAEALAAHK	Thioredoxin	Thioredoxin	31	NO	NO	NO	1	1.09811	0.86797	1.18344	1.55415	1.60603	2.66151	0.9376	0.988781	1.58209	0.709119	4.15916	0.721546	3.89605
P4HB	Protein disulfide-isomerase	P07237	YLLVEFYAPWCGHCK	Thioredoxin	Thioredoxin	43	NO	NO	NO	1	0.951652	1.16529	1.61834	1.96121	3.39608	125.452	0.9671	1.05592	5.97525	1.06729	1.88824	1.5419	3.73743
P4HB	Protein disulfide-isomerase	P07237	EADDIVNWLKK	Thioredoxin	Thioredoxin	121	NO	NO	NO	1	0.90261	0.922864	1.10386	1.5739	1.59861	3.52481	0.9895	0.941255	1.59719	0.729589	2.6829	0.851479	3.13854
P4HB	Protein disulfide-isomerase	P07237	SNFAEALAAHK	Thioredoxin	Thioredoxin	32	NO	NO	NO	1	0.875701	0.870725	0.96734	1.38217	1.4727	7.93551	0.9689	0.915803	1.47966	0.660998	2.41994	0.759009	2.79943
P4HB	Protein disulfide-isomerase	P07237	EADDIVNWLK	Thioredoxin	Thioredoxin	121	NO	NO	NO	1	0.95053	0.959048	1.11984	1.7095	1.7069	2.95756	0.9979	0.969844	1.70863	0.98917	2.56942	1.07344	2.78531
PAICS	Bifunctional phosphoribosylaminoimidazole carboxylase/phosphoribosylaminoimidazole succinocarboxamide synthetase	P22234	EIVLADVIDNDSWR	SAICAR_synt	SAICAR_synt	202	YES	NO	NO	1	0.986973	0.922764	1.06951	1.02303	0.530731	107.966	0.9411	-0.22141	1.00046	-0.130628	0.437302	-0.868684	3.21486
PAK2	Serine/threonine-protein kinase PAK 2	Q13177	ECLQALEFLHANQVIHR	PKinase	Protein kinase domain	351	YES	YES	YES	1	0.943195	0.439723	0.255228	0.248956	0.225163	0.101838	0.9995	0.24015	1.00088	-2.0698	7.75112	-2.19061	8.4904
PAK2	Serine/threonine-protein kinase PAK 2	Q13177	LTDFGFCAQITPEQSKR	PKinase	Protein kinase domain	384	YES	YES	YES	1	0.999238	0.590815	0.380313	0.33726	0.353637	0.149156	0.9983	0.355269	1.0063	-1.55483	9.13054	-1.56086	8.33181
PAK2	Serine/threonine-protein kinase PAK 2	Q13177	IGQGASGTVFTATDVALGQEVAIK	PKinase	Protein kinase domain	255	YES	YES	YES	1	0.932595	0.535435	0.294074	0.306403	0.280725	0.122317	0.999	0.287789	0.997546	-1.73716	7.5869	-1.86683	7.72112
PAK2	Serine/threonine-protein kinase PAK 2	Q13177	ELLQHPFLK	Protein kinase-like (PK-like)	Protein kinase domain	493	YES	YES	YES	1	0.958068	0.516035	0.324243	0.325109	0.291187	0.114738	0.9989	0.310448	1.00101	-1.67222	8.8836	-1.748	7.65237
PAK2	Serine/threonine-protein kinase PAK 2	Q13177	TIVSIGDPKK	Protein kinase-like (PK-like)	Protein kinase domain	238	YES	YES	YES	1	1.00378	0.495403	0.361608	0.302346	0.285331	0.13002	0.9945	0.315961	1.00552	-1.71634	7.14757	-1.78672	7.00652
PAK2	Serine/threonine-protein kinase PAK 2	Q13177	SDNVLLGMEGSVK	PKinase	Protein kinase domain	371	YES	YES	YES	1	0.990457	0.420914	0.30685	0.259981	0.257672	0.110521	0.9977	0.274411	1.00199	-1.81894	7.28538	-2.05485	6.62377
PAK2	Serine/threonine-protein kinase PAK 2	Q13177	TIVSIGDPK	Protein kinase-like (PK-like)	Protein kinase domain	238	YES	YES	YES	1	1.03564	0.55751	0.371968	0.365557	0.320876	0.170034	0.9959	0.352801	1.01783	-1.56914	6.8601	-1.64267	6.53317
PAK2	Serine/threonine-protein kinase PAK 2	Q13177	ELIINEILVMK	PKinase	Protein kinase domain	289	YES	YES	YES	1	0.838693	0.318723	0.21624	0.134172	0.113209	0.0658813	0.994	0.1461	1.00323	-2.68582	6.52669	-2.90874	6.41828
PAK2	Serine/threonine-protein kinase PAK 2	Q13177	KELIINEILVMK	PKinase	Protein kinase domain	288	YES	YES	YES	1	1.12368	0.484735	0.291532	0.221572	0.234651	0.170473	0.9871	0.249263	1.06184	-2.1043	8.26432	-2.18943	6.41295
PAK2	Serine/threonine-protein kinase PAK 2	Q13177	ALYLIATNGTPELQNPEKLSPIFR	PKinase	Protein kinase domain	451	YES	YES	YES	1	1.06594	0.49546	0.270764	0.281451	0.28674	0.168635	0.9967	0.279651	1.03297	-1.95748	6.84554	-1.95883	6.27118
PAK2	Serine/threonine-protein kinase PAK 2	Q13177	DIKSDNVLLGMEGSVK	PKinase	Protein kinase domain	368	YES	YES	YES	1	1.03577	0.660388	0.481819	0.470744	0.48004	0.174031	0.998	0.477532	1.01789	-1.14942	6.65006	-1.14992	6.0399
PAK2	Serine/threonine-protein kinase PAK 2	Q13177	ALYLIATNGTPELQNPEK	PKinase	Protein kinase domain	451	YES	YES	YES	1	0.914053	0.407044	0.248472	0.236296	0.23432	0.0839247	1	0.236807	1.00027	-2.13054	7.61973	-2.24173	5.8192
PAK2	Serine/threonine-protein kinase PAK 2	Q13177	LAKPLSSLTPLIMAAK	Protein kinase-like (PK-like)	Protein kinase domain	502	YES	YES	YES	1	0.91975	0.513444	0.312138	0.266036	0.259599	0.112235	0.9991	0.268789	1.00349	-1.8557	5.79925	-1.73508	5.63816
PAK2	Serine/threonine-protein kinase PAK 2	Q13177	MTDEEIMEK	Protein kinase-like (PK-like)	Protein kinase domain	227	YES	YES	YES	1	1.09449	0.503509	0.339999	0.321406	0.36922	0.160589	0.9908	0.343541	1.04725	-1.6064	5.80391	-1.62259	5.58996
PAK2	Serine/threonine-protein kinase PAK 2	Q13177	CLEMDVEKR	PKinase	Protein kinase domain	480	YES	YES	YES	1	0.970836	0.558639	0.375254	0.34203	0.34606	0.123681	0.9992	0.351163	1.00311	-1.462	7.41878	-1.63874	5.52467
PAK2	Serine/threonine-protein kinase PAK 2	Q13177	LSPIFRDFLNR	PKinase	Protein kinase domain	469	YES	YES	YES	1	1.05553	0.706255	0.455383	0.415223	0.40529	0.193468	0.9933	0.425279	1.02779	-1.28254	6.04685	-1.28346	5.12407
PAK2	Serine/threonine-protein kinase PAK 2	Q13177	QINLQKQPK	PKinase	Protein kinase domain	279	YES	YES	YES	1	1.05062	0.638995	0.354305	0.285732	0.354166	0.190775	0.9924	0.331397	1.02532	-1.84301	5.82316	-1.50999	4.77884
PAK2	Serine/threonine-protein kinase PAK 2	Q13177	LLQTSNITKLEQK	PBD	PBD	105	YES	YES	YES	1	1.05055	0.881102	0.731615	0.644645	0.636561	0.441653	0.9789	0.637816	1.02926	-0.624919	4.37989	-0.644236	4.37883
PAK2	Serine/threonine-protein kinase PAK 2	Q13177	TKMTDEEIMEK	Protein kinase-like (PK-like)	Protein kinase domain	225	YES	YES	YES	1	1.21307	0.445583	0.193468	0.35779	0.28771	0.151802	0.9587	0.279654	1.10657	-1.59671	2.86186	-2.50459	3.14149
PAK4	Serine/threonine-protein kinase PAK 4	O96013	AGPPASIVPLMR	Protein kinase-like (PK-like)	Protein kinase domain	575	YES	YES	YES	1	0.887579	0.481165	0.435102	0.289234	0.206289	0.103472	0.9616	0.263008	1.0174	-1.90643	6.81674	-2.2868	7.3465
PAK4	Serine/threonine-protein kinase PAK 4	O96013	IGEGSTGIVCIATVR	PKinase	Protein kinase domain	327	YES	YES	YES	1	0.84799	0.507642	0.396427	0.242767	0.218251	0.123195	0.9866	0.222225	1.0097	-1.83701	5.54762	-2.18189	7.27716
PAK4	Serine/threonine-protein kinase PAK 4	O96013	SDSILLTHDGR	PKinase	Protein kinase domain	443	YES	YES	YES	1	0.926441	0.384812	0.210401	0.151325	0.0715029	0.103	0.9905	0.135071	1.0089	-2.56426	4.97081	-3.69225	6.68542
PAK4	Serine/threonine-protein kinase PAK 4	O96013	ELLFNEVVIMR	PKinase	Protein kinase domain	361	YES	YES	YES	1	0.89976	0.462338	0.377044	0.35977	0.321332	0.0663784	0.9969	0.350108	1.00091	-1.70348	3.57326	-1.51144	5.39638
PAK4	Serine/threonine-protein kinase PAK 4	O96013	RELLFNEVVIMR	PKinase	Protein kinase domain	360	YES	YES	YES	1	0.971589	0.642261	0.532469	0.350944	0.327568	0.270659	0.9726	0.324297	1.02362	-1.65044	4.37624	-1.65569	5.26852
PAK4	Serine/threonine-protein kinase PAK 4	O96013	AALQLVVDPGDPR	Protein kinase-like (PK-like)	Protein kinase domain	306	YES	YES	YES	1	0.863809	0.527521	0.479298	0.240256	0.259294	0.175651	0.9653	0.224424	1.01111	-1.93834	7.01169	-2.11035	5.25394
PBDC1	Protein PBDC1	Q9BVG4	FNGIVEDFNYGTLLR	Polysacc_synt_4	Polysacc_synt_4	108	YES	NO	NO	1	0.908392	1.01542	0.946025	0.821608	0.64034	37.7625	0.9299	0.521999	0.97295	-0.276945	2.01823	-0.56151	3.53302
PBDC1	Protein PBDC1	Q9BVG4	LISSVDPQFLK	Polysacc_synt_4	Polysacc_synt_4	53	YES	NO	NO	1	0.890659	0.982983	0.951682	0.7774	0.647558	17.5624	0.9268	0.63593	0.957691	-0.272113	1.99392	-0.507232	3.10185
PBDC1	Protein PBDC1	Q9BVG4	IQFFAIEIAR	Polysacc_synt_4	Polysacc_synt_4	140	YES	NO	NO	1	1.00005	0.939295	1.01613	0.874857	0.62248	23.9645	0.9693	0.621805	0.988868	-0.428675	1.41207	-0.647244	2.72028
PBDC1	Protein PBDC1	Q9BVG4	AVYISVQDKEGEK	unannotated	unannotated	157	YES	NO	NO	1	1.16896	0.826121	0.713399	0.50331	0.151679	102.147	0.931	-0.726379	1.06397	-0.581025	0.969854	-2.06851	2.57505
PCMT1	Protein-L-isoaspartate(D-aspartate) O-methyltransferase	P22061	LILPVGPAGGNQMLEQYDKLQDGSIK	NADP_Rossmann	Protein-L-isoaspartate(D-aspartate) O-methyltransferase (PCMT)	179	YES	NO	NO	1	0.809024	0.780772	0.713972	0.608861	0.60282	1.46854	0.9865	0.416747	0.999278	-0.494561	1.5902	-0.666254	2.10496
PDPK1	3-phosphoinositide-dependent protein kinase 1	O15530	IGSFDETCTR	PKinase	Protein kinase domain	174	YES	YES	YES	1	0.333756	0.24243	0.287424	0.418251	0.378895	79838	0.9496	1.00254	-0.335323	-1.80609	2.42127	-1.34619	1.61076
PHF21A	PHD finger protein 21A	Q96BD5	VTGPGAEAVQIVAK	unannotated	unannotated	186	NO	NO	NO	1	1.15684	1.33113	1.94251	2.1533	2.10616	0.51016	0.9923	1.05377	2.14442	0.839666	2.21613	0.779324	1.99699
PHGDH	D-3-phosphoglycerate dehydrogenase	O43175	ALQSGQCAGAALDVFTEEPPRDR	Form_Glyc_dh	D-isomer specific 2-hydroxyacid dehydrogenase, catalytic domain	248	YES	NO	NO	1	0.820772	0.820121	0.809908	0.774036	0.700306	2.58962	0.9451	0.5602	0.999886	-0.307527	2.04175	-0.498836	2.77812
PI4K2B	Phosphatidylinositol 4-kinase type 2-beta	Q8TCG2	LVILDYIIR	PKinase	Protein kinase domain	293	YES	NO	YES	1	1.12319	1.15988	0.716552	0.511859	0.29823	1.88946	0.9403	0.395516	1.09719	-1.32697	2.46619	-1.71919	3.36164
PIK3C3	Phosphatidylinositol 3-kinase catalytic subunit type 3	Q8NEB9	SLLAAQQTFVDR	Protein kinase-like (PK-like)	Protein kinase domain	540	YES	NO	YES	1	0.985306	0.918512	0.898702	0.791634	0.663312	83.6494	0.9814	0.376112	0.992896	-0.317814	2.08025	-0.471725	3.03518
PIK3C3	Phosphatidylinositol 3-kinase catalytic subunit type 3	Q8NEB9	SALMPAQLFFK	Protein kinase-like (PK-like)	Protein kinase domain	614	YES	NO	YES	1	1.02936	0.977931	0.948508	0.696204	0.584758	10.3203	0.9934	0.552251	1.00535	-0.352774	1.2484	-0.569154	2.03805
PIK3CB	Phosphatidylinositol 4	P42338	VFGEDSVGVIFK	Protein kinase-like (PK-like)	Protein kinase domain	794	YES	NO	YES	1	1.00729	1.08486	0.930049	0.78858	0.629684	21.4984	0.9512	0.515505	1.0278	-0.462923	2.41067	-0.619857	2.54197
PIK3R1	Phosphatidylinositol 3-kinase regulatory subunit alpha	P27986	TAIEAFNETIK	PI3K_P85_iSH2	SH2 domain	482	YES	NO	NO	1	0.982932	1.01921	0.916665	0.877533	0.688528	177.598	0.9528	0.254396	0.995058	-0.314301	1.69447	-0.510419	2.74788
PIM1	Serine/threonine-protein kinase pim-1	P11309	SFFWQVLEAVR	PKinase	Protein kinase domain	146	YES	YES	YES	1	1.09083	0.567644	0.238513	0.168304	0.222332	0.188793	0.9919	0.209716	1.04542	-2.53882	5.18289	-2.41622	4.903
PIP4K2C	Phosphatidylinositol 5-phosphate 4-kinase type-2 gamma	Q8TBX8	DVEFLVQLK	PKinase	Protein kinase domain	269	YES	NO	YES	1	0.890507	0.792624	0.753095	0.185496	0.0844443	5.82915	0.9729	0.059169	0.901426	-2.78936	3.84897	-3.31603	6.79814
PIP4K2C	Phosphatidylinositol 5-phosphate 4-kinase type-2 gamma	Q8TBX8	IMDYSLLLGIHDIIR	PKinase	Protein kinase domain	278	YES	NO	YES	1	1.07802	0.929125	0.669843	0.302984	0.314441	1.99336	0.9873	0.276343	1.02811	-1.53905	4.25247	-1.72673	5.02081
PIP4K2C	Phosphatidylinositol 5-phosphate 4-kinase type-2 gamma	Q8TBX8	VKELPTLK	PKinase	Protein kinase domain	234	YES	NO	YES	1	1.21924	1.0131	0.696018	0.359836	0.227977	2.51307	0.9642	0.216109	1.10691	-1.43959	3.56887	-2.04716	4.35734
PKN1	Serine/threonine-protein kinase N1	Q16512	TLGWEALLAR	Protein kinase-like (PK-like)	Protein kinase domain	876	YES	YES	YES	1	0.476211	0.219536	0.238965	0.209383	0.127312	0.0108607	0.988	0.186737	1.00013	-2.45852	5.9135	-2.92811	7.43311
PKN1	Serine/threonine-protein kinase N1	Q16512	VLLSEFRPSGELFAIK	PKinase	Protein kinase domain	629	YES	YES	YES	1	0.441542	0.258245	0.222504	0.21652	0.210059	0.00672078	1	0.213257	1.00001	-1.89743	2.93522	-2.23213	5.03808
PKN1	Serine/threonine-protein kinase N1	Q16512	DLKLDNLLLDTEGYVK	PKinase	Protein kinase domain	740	YES	YES	YES	1	0.509718	0.258555	0.18443	0.179918	0.198472	0.0123742	0.9993	0.184408	0.999928	-2.308	4.70069	-2.18901	4.6317
PKN1	Serine/threonine-protein kinase N1	Q16512	IADFGLCK	PKinase	Protein kinase domain	756	YES	YES	YES	1	0.822927	0.645752	0.458363	0.432495	0.405375	0.0949607	0.9971	0.398039	0.997859	-1.19596	6.10983	-2.58756	1.39861
PKN2	Serine/threonine-protein kinase N2	Q16513	LIDWSALMDKK	Protein kinase-like (PK-like)	Protein kinase domain	918	YES	YES	YES	1	0.460313	0.372747	0.287777	0.315419	0.263773	0.0013935	0.9957	0.267854	0.999975	-1.3323	2.72052	-1.54148	2.97165
PKN3	Serine/threonine-protein kinase N3	Q6P5Z2	DLKLDNLLLDAQGFLK	PKinase	Protein kinase domain	684	YES	YES	YES	1	0.801897	0.557066	0.357315	0.350162	0.301995	0.0791184	0.9968	0.309611	0.998707	-1.75567	2.76233	-1.81731	3.43988
PKN3	Serine/threonine-protein kinase N3	Q6P5Z2	VLLVQFK	PKinase	Protein kinase domain	573	YES	YES	YES	1	0.749643	0.541409	0.404927	0.374295	0.387318	0.0393794	0.9987	0.370683	0.999262	-1.24807	4.02479	-1.59264	2.70371
PLEC	Plectin	Q15149	EGVMVAKK	HTH	Plectin/S10 domain	22	NO	NO	NO	1	0.870694	0.774028	0.840096	1.11132	1.40784	20.9708	0.9008	0.871201	1.40833	0.289583	1.34449	0.487628	2.72647
PLK1	Serine/threonine-protein kinase PLK1	P53350	HINPVAASLIQK	PKinase	Protein kinase domain	273	YES	YES	YES	1	0.926165	0.748427	0.413961	0.224802	0.231611	0.54179	0.9984	0.202023	0.992241	-1.8844	4.38665	-2.12042	5.44633
PLK1	Serine/threonine-protein kinase PLK1	P53350	QIVLGCQYLHR	PKinase	Protein kinase domain	159	YES	YES	YES	1	1.00709	0.898383	0.464228	0.391826	0.267086	0.731169	0.9877	0.319615	1.00874	-1.46547	4.43434	-1.74922	4.67213
PLK1	Serine/threonine-protein kinase PLK1	P53350	IGDFGLATKVEYDGER	PKinase	Protein kinase domain	192	YES	YES	YES	1	1.12961	0.849289	0.464527	0.352777	0.386613	0.390017	0.9797	0.374509	1.06647	-1.39902	4.0155	-1.68471	3.37604
PLK1	Serine/threonine-protein kinase PLK1	P53350	SLLLKPHQR	PKinase	Protein kinase domain	87	YES	YES	YES	1	1.00728	0.778674	0.526885	0.337055	0.307389	0.643203	0.9942	0.290547	1.02121	-1.10854	2.08096	-1.426	3.28011
PLK1	Serine/threonine-protein kinase PLK1	P53350	LGNLFLNEDLEVK	PKinase	Protein kinase domain	179	YES	YES	YES	1	1.05226	0.988569	0.723856	0.464307	0.674944	1.70088	0.9098	0.569615	1.01366	-1.08496	3.6136	-0.779448	2.69967
PLK1	Serine/threonine-protein kinase PLK1	P53350	KALTEPEAR	PKinase	Protein kinase domain	146	YES	YES	YES	1	0.950292	0.805763	0.477059	0.525388	0.39561	0.314546	0.9724	0.455019	0.980989	-1.41919	1.66157	-1.73131	2.42692
PLK1	Serine/threonine-protein kinase PLK1	P53350	AGVPGVAAPGAPAAAPPAK	Protein kinase-like (PK-like)	Protein kinase domain	20	YES	YES	YES	1	0.986434	0.771717	0.387041	0.34832	0.469788	0.224464	0.9824	0.401704	0.993225	-1.55926	4.56048	-1.38374	2.33574
PNN	Pinin	Q9H307	LIEESQR	unannotated	unannotated	255	NO	NO	NO	1	1.04355	1.27385	1.36734	1.60508	1.82342	9.73631	0.9809	0.989536	2.13148	0.900733	3.02368	0.575679	0.763973
PNPO	Pyridoxine-5'-phosphate oxidase	Q9NVS9	SSQIGAVVSHQSSVIPDREYLR	unannotated	unannotated	164	NO	NO	NO	1	1.02821	1.20853	1.60078	3.54774	3.61514	3.88481	0.9969	1.07577	3.62773	1.78691	8.44235	1.82103	8.38936
PNPO	Pyridoxine-5'-phosphate oxidase	Q9NVS9	SSQIGAVVSHQSSVIPDREYLRK	unannotated	unannotated	164	NO	NO	NO	1	0.669174	1.69326	2.52985	9.71097	9.49413	2.73261	0.9937	1.12074	9.60269	2.60833	3.17871	2.75221	3.74652
PPP1R14B	Protein phosphatase 1 regulatory subunit 14B	Q96C90	VTVKYDR	PP1_inhibitor	PP1_inhibitor	56	NO	NO	NO	1	1.11262	1.15021	1.19176	1.42252	1.52226	5.91944	0.9616	1.02669	1.63435	0.626361	3.12951	0.329792	0.480609
PPP2R2D	Serine/threonine-protein phosphatase 2A 55 kDa regulatory subunit B delta isoform	Q66LE6	AGAGGGGCPAGGNDFQWCFSQVK	unannotated	unannotated	2	NO	NO	NO	1	1.75754	1.52958	1.97032	2.30567	2.99382	17.4682	0.9078	1.07415	3.85786	1.09985	1.85634	1.35717	2.39678
PRDX1	Peroxiredoxin-1	Q06830	LVQAFQFTDKHGEVCPAGWKPGSDTIKPDVQK	unannotated	unannotated	159	YES	NO	NO	1	0.693674	0.644102	0.669075	0.67164	0.513597	0.625897	0.9153	0.305469	1.00027	-0.524418	1.83977	-0.695516	2.16308
PRDX6	Peroxiredoxin-6	P30041	LKLSILYPATTGR	unannotated	unannotated	143	NO	NO	NO	1	1.01269	1.04056	1.05069	1.2177	1.44889	30.6866	0.9941	1.01836	1.55963	0.24077	3.16868	0.556839	5.44533
PRDX6	Peroxiredoxin-6	P30041	LPFPIIDDR	Thioredoxin	AhpC/TSA family	98	NO	NO	NO	1	0.99415	0.989555	1.02958	1.38541	1.59628	14.5887	0.9998	0.994261	1.63412	0.38694	3.48793	0.611546	5.39018
PRDX6	Peroxiredoxin-6	P30041	VVFVFGPDK	Thioredoxin	AhpC/TSA family	133	NO	NO	NO	1	0.939039	1.02413	0.974425	1.21005	1.40346	19.1312	0.9753	0.984333	1.4054	0.271039	2.56322	0.517801	5.02667
PRDX6	Peroxiredoxin-6	P30041	LIALSIDSVEDHLAWSK	Thioredoxin	AhpC/TSA family	68	NO	NO	NO	1	1.05087	1.00378	0.997642	1.16179	1.4973	27.826	0.9899	1.01299	1.51431	0.226116	2.04387	0.592744	4.79844
PRDX6	Peroxiredoxin-6	P30041	NFDEILR	unannotated	unannotated	156	NO	NO	NO	1	1.06959	1.11715	1.12754	1.31526	1.55203	12.9293	0.9495	1.04769	1.59206	0.292026	2.1647	0.579446	4.73211
PRDX6	Peroxiredoxin-6	P30041	LSILYPATTGR	unannotated	unannotated	145	NO	NO	NO	1	0.971854	1.07229	1.06672	1.22351	1.49526	30.2578	0.9673	1.01746	1.60854	0.305951	2.69643	0.59425	4.60612
PRDX6	Peroxiredoxin-6	P30041	DINAYNCEEPTEK	Thioredoxin	AhpC/TSA family	85	NO	NO	NO	1	0.998947	0.926773	0.892118	1.19196	1.39006	19.2417	0.9514	0.954459	1.39026	0.269353	2.23083	0.55212	4.25717
PRDX6	Peroxiredoxin-6	P30041	VVISLQLTAEKR	unannotated	unannotated	163	NO	NO	NO	1	1.00982	0.957465	0.964517	1.10716	1.33257	24.6039	0.9803	0.9829	1.33785	0.141491	1.0231	0.506032	3.85747
PRDX6	Peroxiredoxin-6	P30041	RVATPVDWK	1-cysPrx_C	1-cysPrx_C	174	NO	NO	NO	1	1.10376	0.977571	0.965948	1.19817	1.54548	24.7918	0.9514	1.01181	1.55352	0.285165	2.02843	0.62541	3.72947
PRDX6	Peroxiredoxin-6	P30041	VVFVFGPDKK	Thioredoxin	AhpC/TSA family	133	NO	NO	NO	1	1.05563	1.02953	1.06853	1.13174	1.37427	25.9011	0.9705	1.03836	1.37644	0.291256	2.15562	0.584871	3.50387
PRDX6	Peroxiredoxin-6	P30041	ELAILLGMLDPAEKDEK	Thioredoxin	AhpC/TSA family	109	NO	NO	NO	1	1.06567	1.1456	1.00829	1.20776	1.59784	24.1283	0.9461	1.05489	1.59829	0.23394	1.7512	0.541997	3.38215
PRDX6	Peroxiredoxin-6	P30041	DFTPVCTTELGR	Thioredoxin	AhpC/TSA family	42	NO	NO	NO	1	1.03978	0.983813	1.03064	1.22368	1.41085	21.8033	0.988	1.00838	1.46571	0.199772	1.38914	0.451378	3.36844
PRDX6	Peroxiredoxin-6	P30041	PGGLLLGDVAPNFEANTTVGR	unannotated	unannotated	2	NO	NO	NO	1	0.974227	1.00991	0.9533	1.22433	1.45214	19.751	0.9899	0.984344	1.45311	0.188487	1.16941	0.452875	3.33368
PRDX6	Peroxiredoxin-6	P30041	ELAILLGMLDPAEK	Thioredoxin	AhpC/TSA family	109	NO	NO	NO	1	1.08283	1.00475	1.08177	1.2808	1.52474	27.0689	0.9772	1.03124	1.64402	0.362497	1.68155	0.620522	2.98829
PRDX6	Peroxiredoxin-6	P30041	NRELAILLGMLDPAEK	Thioredoxin	AhpC/TSA family	107	NO	NO	NO	1	1.09988	0.976117	1.15972	1.26927	1.54927	27.0193	0.9259	1.03012	1.69611	0.206656	0.535086	0.631306	2.39942
PRDX6	Peroxiredoxin-6	P30041	NVKLIALSIDSVEDHLAWSK	Thioredoxin	AhpC/TSA family	65	NO	NO	NO	1	1.0635	1.09453	1.10573	0.916889	1.65689	94.2285	0.9289	1.0361	2.10331	0.107289	0.156148	0.755073	2.13071
PRKAA1	5'-AMP-activated protein kinase catalytic subunit alpha-1	Q13131	IGHYILGDTLGVGTFGK	Protein kinase-like (PK-like)	Protein kinase domain	24	YES	YES	YES	1	0.276312	0.127105	0.112886	0.113934	0.0898416	0.00418858	0.9995	0.103825	1	-3.25943	9.02904	-3.46447	8.767
PRKAA1	5'-AMP-activated protein kinase catalytic subunit alpha-1	Q13131	ICDGIFYTPQYLNPSVISLLK	PKinase	Protein kinase domain	237	YES	YES	YES	1	0.306044	0.096769	0.0748476	0.0517171	0.056466	0.00627772	0.9997	0.0580384	1.00001	-4.05937	5.72925	-3.76673	5.09412
PRKAA1	5'-AMP-activated protein kinase catalytic subunit alpha-1	Q13131	NHQDPLAVAYHLIIDNRR	Protein kinase-like (PK-like)	Protein kinase domain	326	YES	YES	YES	1	0.692803	0.648407	0.627669	0.663538	0.54833	0.139512	0.9588	0.332599	1.00013	-0.677918	2.75854	-1.1126	2.3654
PRKACA	cAMP-dependent protein kinase catalytic subunit alpha	P17612	ILQAVNFPFLVK	PKinase	Protein kinase domain	95	YES	YES	YES	1	0.844595	0.678545	0.504601	0.254906	0.16599	2.22058	0.9981	-0.0509201	0.999736	-2.05389	6.03092	-2.65797	6.83949
PRKACA	cAMP-dependent protein kinase catalytic subunit alpha	P17612	DNSNLYMVMEYVPGGEMFSHLR	PKinase	Protein kinase domain	113	YES	YES	YES	1	0.935921	0.902132	0.856757	0.293339	0.222312	5.99796	0.9921	0.216179	0.947221	-1.93111	3.95507	-2.00509	4.72631
PRKACA	cAMP-dependent protein kinase catalytic subunit alpha	P17612	KWESPAQNTAHLDQFER	Protein kinase-like (PK-like)	Protein kinase domain	30	YES	YES	YES	1	0.803167	0.768906	0.583523	0.235956	0.130227	18.3977	0.9842	-0.384567	0.982254	-2.00752	5.81714	-2.74805	4.59743
PRKACA	cAMP-dependent protein kinase catalytic subunit alpha	P17612	DLKPENLLIDQQGYIQVTDFGFAKR	PKinase	Protein kinase domain	167	YES	YES	YES	1	0.738769	0.878248	0.330553	0.140721	0.131716	1.55024	0.9535	0.136208	0.872402	-2.71894	4.69477	-2.61998	4.52298
PRKACA	cAMP-dependent protein kinase catalytic subunit alpha	P17612	FSEPHAR	PKinase	Protein kinase domain	139	YES	YES	YES	1	1.05883	1.13623	0.857375	0.454139	0.254768	7.54507	0.9781	0.203797	1.06565	-2.08419	1.68335	-1.86638	3.84247
PRKACA	cAMP-dependent protein kinase catalytic subunit alpha	P17612	WFATTDWIAIYQR	Protein kinase-like (PK-like)	Protein kinase domain	297	YES	YES	YES	1	0.881566	0.748899	0.66756	0.368827	0.333282	5.09153	0.9794	0.0744106	0.995161	-1.37228	4.68483	-1.93595	3.72713
PRKACA	cAMP-dependent protein kinase catalytic subunit alpha	P17612	WESPAQNTAHLDQFER	Protein kinase-like (PK-like)	Protein kinase domain	31	YES	YES	YES	1	0.862689	0.911291	0.41143	0.152208	0.0797633	1.41105	0.9864	0.106078	0.938687	-2.13374	2.52495	-2.86107	2.81993
PRKACA	cAMP-dependent protein kinase catalytic subunit alpha	P17612	VRFPSHFSSDLKDLLR	PKinase	Protein kinase domain	256	YES	YES	YES	1	1.06134	1.07601	0.764989	0.70692	0.36609	178.902	0.9222	-0.491065	1.04884	-0.690397	1.53259	-1.13436	2.0816
PRKACA	cAMP-dependent protein kinase catalytic subunit alpha	P17612	GSEQESVKEFLAK	Protein kinase-like (PK-like)	Protein kinase domain	10	NO	YES	YES	1	0.870978	1.23803	1.38644	1.54789	1.8377	6.94504	0.9279	0.939537	2.06585	0.752489	1.12755	1.11138	2.01516
PRKACA	cAMP-dependent protein kinase catalytic subunit alpha	P17612	TLGTGSFGR	PKinase	Protein kinase domain	49	YES	YES	YES	1	1.02575	0.882275	0.546797	0.390207	0.321679	0.892055	0.9961	0.332716	1.0202	-1.65651	3.85998	-2.87076	1.71246
PRKAR1A	cAMP-dependent protein kinase type I-alpha regulatory subunit	P10644	ILMGSTLR	cAMP-dependent protein kinase, regulatory subunit	Cyclic nucleotide-monophosphate binding domain	234	NO	NO	NO	1	0.969644	1.17014	1.34713	1.40134	1.41342	0.259041	0.9902	0.977387	1.40247	0.581214	4.04285	0.601993	4.21006
PRKAR1A	cAMP-dependent protein kinase type I-alpha regulatory subunit	P10644	VSILESLDKWER	cAMP-dependent protein kinase, regulatory subunit	Cyclic nucleotide-monophosphate binding domain	253	NO	NO	NO	1	1.05259	1.13423	1.47595	1.59194	1.54398	0.569908	0.9931	1.02115	1.57068	0.675343	4.41617	0.561431	3.62084
PRKAR1A	cAMP-dependent protein kinase type I-alpha regulatory subunit	P10644	VLGPCSDILKR	cAMP-dependent protein kinase, regulatory subunit	cAMP/cGMP binding motif profile	358	NO	NO	NO	1	0.864397	1.07186	1.37786	1.45284	1.40487	0.378091	0.963	0.932474	1.424	0.527506	3.23119	0.555823	3.43422
PRKAR1A	cAMP-dependent protein kinase type I-alpha regulatory subunit	P10644	RSENEEFVEVGR	Cupin	cAMP/cGMP binding motif profile	306	NO	NO	NO	1	1.06873	0.853941	1.4446	1.65305	1.64625	1.63932	0.9601	0.974169	1.64951	0.892478	2.91582	0.72241	2.31512
PRKAR1A	cAMP-dependent protein kinase type I-alpha regulatory subunit	P10644	NVLFSHLDDNER	cAMP-dependent protein kinase, regulatory subunit	Cyclic nucleotide-monophosphate binding domain	135	NO	NO	NO	1	1.13985	1.31533	1.59351	1.72837	1.74517	0.335392	0.9983	1.0067	1.77848	0.932758	2.53518	0.862624	2.28676
PRKAR1A	cAMP-dependent protein kinase type I-alpha regulatory subunit	P10644	GAISAEVYTEEDAASYVR	cAMP-dependent protein kinase, regulatory subunit	Protein kinase domain	98	NO	NO	NO	1	1.08558	1.18001	1.25803	1.32225	1.42023	1.12208	0.9868	0.995384	1.48188	0.393297	2.12049	0.376229	1.84167
PRKAR1A	cAMP-dependent protein kinase type I-alpha regulatory subunit	P10644	MYEEFLSK	cAMP-dependent protein kinase, regulatory subunit	Cyclic nucleotide-monophosphate binding domain	245	NO	NO	NO	1	1.59979	1.46805	1.92496	2.09865	2.02489	0.233887	0.9175	1.00475	2.35921	0.827054	2.33667	0.422201	0.432394
PRKAR2B	cAMP-dependent protein kinase type II-beta regulatory subunit	P31323	CLAMDVQAFER	Cupin	Cyclic nucleotide-binding domain	373	NO	NO	NO	1	1.06165	1.30738	1.45437	1.40392	1.31193	0.0714373	0.9354	1.00266	1.38895	0.470089	3.65622	0.292012	1.968
PRKCA	Protein kinase C alpha type	P17252	GTEELYAIK	PKinase	Protein kinase domain	360	YES	YES	YES	1	0.98904	0.723958	0.369634	0.182934	0.154332	0.506959	0.9979	0.145468	1.01762	-2.64159	6.94641	-2.89769	6.85346
PRKCA	Protein kinase C alpha type	P17252	VLALLDKPPFLTQLHSCFQTVDR	PKinase	Protein kinase domain	390	YES	YES	YES	1	0.770433	0.189058	0.0470209	0.0444099	0.0257994	0.051648	0.9998	0.0351623	1.00006	-4.62744	6.39438	-4.79414	5.88646
PRKCA	Protein kinase C alpha type	P17252	LGCGPEGERDVR	Protein kinase-like (PK-like)	Protein kinase domain	581	YES	YES	YES	1	1.03836	0.768968	0.460431	0.102544	0.101368	1.08939	0.9894	0.0446754	1.02877	-3.00173	5.78015	-3.22052	5.76674
PRKCA	Protein kinase C alpha type	P17252	EHMMDGVTTR	PKinase	Protein kinase domain	487	YES	YES	YES	1	0.901704	0.476977	0.188929	0.0982642	0.0655663	0.154954	0.9981	0.082921	1.00941	-3.10852	4.6409	-3.60549	5.60914
PRKCA	Protein kinase C alpha type	P17252	VMLADRK	PKinase	Protein kinase domain	353	YES	YES	YES	1	0.872848	0.722531	0.390386	0.209074	0.207108	0.506495	0.996	0.167099	0.984	-2.15221	7.63526	-2.48579	5.56711
PRKCA	Protein kinase C alpha type	P17252	RIDWEKLENR	Protein kinase-like (PK-like)	Protein kinase domain	599	YES	YES	YES	1	1.04984	1.09239	0.548414	0.276073	0.283278	1.77238	0.9942	0.279677	1.04741	-1.95111	5.10794	-1.88253	5.40381
PRKCA	Protein kinase C alpha type	P17252	EIQPPFKPK	Protein kinase-like (PK-like)	Protein kinase domain	609	YES	YES	YES	1	1.38688	0.550315	0.0945519	0.0336775	0.0137155	0.188567	0.9527	0.0478399	1.19344	-4.77118	5.14477	-5.86463	4.92936
PRKCA	Protein kinase C alpha type	P17252	KGTEELYAIK	PKinase	Protein kinase domain	359	YES	YES	YES	1	1.05976	0.856861	0.233864	0.203608	0.135729	0.451495	0.9955	0.169276	1.03131	-2.96385	3.43834	-2.54316	2.69957
PRKCB	Protein kinase C beta type	P05771	GTDELYAVK	PKinase	Protein kinase domain	363	YES	YES	YES	1	0.766873	0.308472	0.136538	0.110623	0.113854	0.0566703	1	0.110914	1	-3.35045	7.78227	-3.24698	8.85582
PRKCB	Protein kinase C beta type	P05771	DLKLDNVMLDSEGHIK	PKinase	Protein kinase domain	466	YES	YES	YES	1	0.915999	0.380539	0.188862	0.10451	0.113926	0.10188	0.9967	0.126885	1.00608	-3.27283	8.68453	-3.30357	8.46134
PRKCB	Protein kinase C beta type	P05771	LTDFNFLMVLGK	Protein kinase-like (PK-like)	Protein kinase domain	339	YES	YES	YES	1	0.841247	0.350747	0.181922	0.133026	0.121683	0.0752551	0.9989	0.135573	1.00205	-2.95833	8.77227	-3.11172	8.13254
PRKCB	Protein kinase C beta type	P05771	YIDWEKLER	Protein kinase-like (PK-like)	Protein kinase domain	602	YES	YES	YES	1	0.791555	0.259634	0.136051	0.111209	0.101724	0.0531474	0.9996	0.111701	1.00045	-3.37169	7.74548	-3.24484	8.05829
PRKCB	Protein kinase C beta type	P05771	DIKEHAFFR	Protein kinase-like (PK-like)	Protein kinase domain	593	YES	YES	YES	1	0.879827	0.352725	0.184536	0.133626	0.138604	0.0819349	0.999	0.145728	1.00199	-2.89748	8.20881	-2.70821	7.73888
PRKCB	Protein kinase C beta type	P05771	EAVAICK	PKinase	Protein kinase domain	567	YES	YES	YES	1	0.604776	0.23575	0.133086	0.109818	0.118758	0.0255348	0.9999	0.113532	1.00001	-3.1594	8.02603	-3.08124	7.60669
PRKCB	Protein kinase C beta type	P05771	VLALPGKPPFLTQLHSCFQTMDR	PKinase	Protein kinase domain	393	YES	YES	YES	1	0.72679	0.149047	0.0214429	0.0332944	0.0128937	0.0432372	0.9997	0.0197642	0.999893	-5.39193	6.21934	-6.12274	7.31749
PRKCB	Protein kinase C beta type	P05771	ENIWDGVTTK	PKinase	Protein kinase domain	490	YES	YES	YES	1	0.694842	0.180607	0.0927967	0.0761099	0.067184	0.0361644	0.9998	0.075502	1.00014	-3.93715	7.93763	-3.76688	7.10803
PRKCB	Protein kinase C beta type	P05771	LGCGPEGER	PKinase	Protein kinase domain	584	YES	YES	YES	1	0.794572	0.309466	0.205954	0.151944	0.13184	0.0543449	0.9972	0.155626	1.00152	-3.04535	6.10263	-2.97014	6.84322
PRKCB	Protein kinase C beta type	P05771	TFCGTPDYIAPEIIAYQPYGK	PKinase	Protein kinase domain	500	YES	YES	YES	1	0.806609	0.353677	0.224318	0.156324	0.150535	0.0628171	0.9975	0.165314	1.00229	-2.70323	8.55997	-2.55421	6.67221
PRKCB	Protein kinase C beta type	P05771	DVVIQDDDVECTMVEKR	PKinase	Protein kinase domain	376	YES	YES	YES	1	0.873896	0.400158	0.187894	0.0963837	0.116692	0.101346	0.9977	0.116832	1.005	-3.27169	6.68663	-3.07778	6.55535
PRKCB	Protein kinase C beta type	P05771	LDNVMLDSEGHIK	PKinase	Protein kinase domain	469	YES	YES	YES	1	0.724593	0.184674	0.0631221	0.0314892	0.032386	0.0447909	0.9997	0.0369107	1.00034	-4.78205	6.87117	-4.80125	6.44955
PRKCB	Protein kinase C beta type	P05771	IADFGMCKENIWDGVTTK	PKinase	Protein kinase domain	482	YES	YES	YES	1	0.802975	0.284198	0.193419	0.143903	0.1099	0.0538402	0.9963	0.143166	1.00141	-2.82112	6.46175	-3.14124	6.03348
PRKCB	Protein kinase C beta type	P05771	DVVIQDDDVECTMVEK	PKinase	Protein kinase domain	376	YES	YES	YES	1	0.923281	0.14723	0.0438432	0.0294181	0.0578818	0.0688485	0.9996	0.0433049	0.999986	-4.93404	6.13839	-4.55403	5.73032
PRKCB	Protein kinase C beta type	P05771	TTNTVSKFDNNGNR	Protein kinase-like (PK-like)	Protein kinase domain	321	YES	YES	YES	1	0.719651	0.599036	0.585643	0.467324	0.442876	0.186392	0.9884	0.265567	1.00025	-0.827247	1.77209	-0.937854	2.45762
PRKCB	Protein kinase C beta type	P05771	KEIQPPYKPK	Protein kinase-like (PK-like)	Protein kinase domain	611	YES	YES	YES	1	0.955017	0.467135	0.349268	0.513382	0.549214	0.0379217	0.9381	0.469515	0.999854	-1.48879	2.40393	-2.24658	1.14905
PRKCD	Protein kinase C delta type	Q05655	IADFGMCKENIFGESR	PKinase	Protein kinase domain	489	YES	YES	YES	1	0.50112	0.151818	0.303037	0.121839	0.170276	0.0178235	0.9661	0.186732	0.99999	-2.41529	3.14369	-2.09893	2.70704
PRKCI	Protein kinase C iota type	P41743	ASSSLGLQDFDLLR	Protein kinase-like (PK-like)	Protein kinase domain	245	YES	YES	YES	1	0.965888	0.457917	0.363661	0.207808	0.16944	0.108537	0.9721	0.235863	1.0187	-2.05775	4.13736	-2.35013	5.06336
PRKCI	Protein kinase C iota type	P41743	FYSAEISLALNYLHER	PKinase	Protein kinase domain	357	YES	YES	YES	1	0.9826	0.599906	0.488764	0.421397	0.252206	0.166788	0.9461	0.342506	1.03019	-1.72438	2.55397	-1.93633	3.94381
PRKCI	Protein kinase C iota type	P41743	LGCHPQTGFADIQGHPFFR	Protein kinase-like (PK-like)	Protein kinase domain	505	YES	YES	YES	1	0.994155	0.486421	0.312513	0.352913	0.244539	0.12962	0.9899	0.302938	1.00113	-1.47926	3.45314	-1.96636	3.84968
PRKCQ	Protein kinase C theta type	Q04759	LKIEDFILHK	Protein kinase-like (PK-like)	Protein kinase domain	375	YES	YES	YES	1	0.333617	0.085348	0.100191	0.105584	0.0543604	0.0142626	0.9976	0.0862922	0.999995	-3.37393	6.553	-4.03363	5.77191
PRKCQ	Protein kinase C theta type	Q04759	VFLAEFK	PKinase	Protein kinase domain	394	YES	YES	YES	1	0.471527	0.0640026	0.0606238	0.0593119	0.0278076	0.01751	0.9991	0.0489749	1	-4.44748	6.34285	-4.90617	5.33812
PRKCQ	Protein kinase C theta type	Q04759	TNQFFAIK	PKinase	Protein kinase domain	402	YES	YES	YES	1	0.341471	0.120498	0.163848	0.129402	0.102407	0.0149639	0.9967	0.129031	1	-2.63367	3.76511	-2.88228	3.77715
PRKCQ	Protein kinase C theta type	Q04759	NFSFMNPGMER	Protein kinase-like (PK-like)	Protein kinase domain	693	NO	YES	YES	1	2.48348	2.90588	3.39449	3.54261	3.56855	0.0129386	0.9978	1.00151	3.70244	2.02663	3.65094	2.00595	3.53962
PROSER2	Proline and serine-rich protein 2	Q86WR7	AAVSVQER	unannotated	unannotated	274	NO	NO	NO	1	0.932403	1.28199	1.3084	1.3201	1.29716	0.115009	0.9833	0.966136	1.3086	0.556228	2.4355	0.592286	2.04939
PRPF4B	Serine/threonine-protein kinase PRP4 homolog	Q13523	VQSGMGLILQGYESGSEEEGEIHEK	Protein kinase-like (PK-like)	Protein kinase domain	129	NO	YES	YES	1	1.80381	1.14035	2.86049	3.59179	3.52298	1.67283	0.9451	1.31467	3.5574	1.6742	3.48877	1.78486	3.51318
PRPF4B	Serine/threonine-protein kinase PRP4 homolog	Q13523	DLLADLIGCQRLPEDQR	PKinase	Protein kinase domain	954	YES	YES	YES	1	0.932074	1.1111	0.82792	0.559386	0.485554	2.46039	0.9384	0.520769	1.01438	-0.774516	2.58862	-0.992724	3.47282
PRRC2A	Protein PRRC2A	P48634	ETPPNGNLSPAPR	unannotated	unannotated	996	NO	NO	NO	1	2.66472	2.72215	2.36653	2.47634	2.44844	63067.2	0.9553	4.07892	0.999263	0.882337	1.7235	1.33736	2.50996
PSPH	Phosphoserine phosphatase	P78330	AMGGAVPFK	HAD	haloacid dehalogenase-like hydrolase	51	NO	NO	NO	1	1.52641	1.92067	1.90766	2.41965	2.13232	0.0437715	0.9233	0.998858	2.2989	0.941512	2.09336	-0.921812	0.25167
PTK2	Focal adhesion kinase 1	Q05397	LGDFGLSR	PKinase	Protein kinase domain	562	YES	YES	YES	1	0.782735	0.376471	0.268971	0.21929	0.209961	0.0510115	0.9983	0.223155	1.00119	-1.87263	4.32801	-1.92436	4.41348
PTPMT1	Phosphatidylglycerophosphatase and protein-tyrosine phosphatase 1	Q8WUK0	IDPTVLLGALPLR	Q8WUK0	unannotated	41	NO	NO	NO	1	1.3037	1.66315	1.29896	2.84604	3.25458	13.8967	0.9488	1.31593	3.25535	1.1548	2.19538	1.41588	2.91045
PUS1	Pseudouridylate synthase 1 homolog	Q9Y606	GYAPESVLER	PseudoU_synth	tRNA pseudouridine synthase	307	YES	NO	NO	1	0.919376	1.02237	0.956861	0.754441	0.599317	17.5718	0.9564	0.565628	0.979721	-0.258292	1.06539	-0.554297	2.14383
QNG1	Queuosine 5'-phosphate N-glycosylase/hydrolase	Q5T6V5	MDGLLNPR	unannotated	unannotated	1	NO	NO	NO	1	1.18762	0.98194	1.10227	1.41884	1.75251	23.1779	0.9402	1.05884	1.85839	0.491572	2.73179	0.609994	2.37094
QNG1	Queuosine 5'-phosphate N-glycosylase/hydrolase	Q5T6V5	FGGSFLNCVR	Q_salvage	Q_salvage	163	NO	NO	NO	1	0.91786	0.913422	0.799741	1.11613	1.37851	20.8411	0.9026	0.907747	1.37855	0.24762	1.80021	0.412722	2.36451
QNG1	Queuosine 5'-phosphate N-glycosylase/hydrolase	Q5T6V5	VAELLLAK	unannotated	unannotated	31	NO	NO	NO	1	0.942595	0.864128	0.921523	1.27713	1.40465	16.2262	0.9607	0.932046	1.40465	0.319445	1.75228	0.427601	2.02422
RBM34	RNA-binding protein 34	P42696	TVFVGNLPVTCNK	unannotated	unannotated	186	NO	NO	NO	1	0.987137	0.90893	1.01945	1.29138	1.44778	12.9904	0.9765	0.966691	1.48349	0.449063	1.9226	0.629961	2.78691
RFX1	MHC class II regulatory factor RFX1	P22670	LLVQTSVQAKPGHVSPLQLTNIQVPQQALPTQR	unannotated	unannotated	145	YES	NO	NO	1	1.03317	1.0033	0.66917	0.480553	0.529216	1.45657	0.9944	0.504485	1.01382	-1.0706	2.2824	-0.794798	1.14181
RIOK2	Serine/threonine-protein kinase RIO2	Q9BVS4	NHEIVPGSLIASIASLK	HTH	Rio2, N-terminal	29	YES	YES	YES	1	0.850852	0.988313	0.908261	0.559226	0.453453	9.58352	0.9483	0.443313	0.945995	-0.773218	5.74357	-1.17553	6.25992
RIOK2	Serine/threonine-protein kinase RIO2	Q9BVS4	FSYESELFPTFK	Protein kinase-like (PK-like)	Protein kinase domain	277	YES	YES	YES	1	1.05717	1.04073	1.00322	0.717725	0.561234	13.7817	0.9918	0.534553	1.03267	-0.570824	3.89137	-0.903916	5.88824
RIOK2	Serine/threonine-protein kinase RIO2	Q9BVS4	HNVSWLYLSR	PKinase	Protein kinase domain	146	YES	YES	YES	1	1.11562	0.917038	0.98072	0.479793	0.402273	8.06724	0.9554	0.398583	1.01156	-0.931792	2.61848	-1.26542	4.93128
RIOK2	Serine/threonine-protein kinase RIO2	Q9BVS4	VLTAVEMGMK	HTH	Rio2, N-terminal	19	YES	YES	YES	1	0.945041	1.05374	0.936143	0.625936	0.47883	11.0704	0.9764	0.448737	0.998602	-0.726236	4.79896	-0.997012	4.76494
RIOK2	Serine/threonine-protein kinase RIO2	Q9BVS4	REDTLDVEVSASGYTK	Protein kinase-like (PK-like)	Protein kinase domain	292	YES	YES	YES	1	0.962629	0.834848	0.857797	0.569826	0.4021	81.6912	0.9653	-0.136265	0.98308	-0.754579	3.61559	-1.15504	4.72738
RIOK2	Serine/threonine-protein kinase RIO2	Q9BVS4	RFSYESELFPTFK	Protein kinase-like (PK-like)	Protein kinase domain	276	YES	YES	YES	1	1.02747	0.867567	1.0027	0.622017	0.473147	16.6998	0.9418	0.473049	0.974437	-1.11847	1.92238	-1.11551	4.45481
RIOK2	Serine/threonine-protein kinase RIO2	Q9BVS4	QVVESVGNQMGVGK	Protein kinase-like (PK-like)	Protein kinase domain	92	YES	YES	YES	1	0.986023	1.13093	0.996671	0.576039	0.457967	9.46491	0.965	0.448671	1.03801	-0.823063	4.49639	-1.08275	4.38924
RIOK2	Serine/threonine-protein kinase RIO2	Q9BVS4	LTNAGYDYLALK	HTH	Rio2, N-terminal	75	YES	YES	YES	1	0.983166	1.06134	0.936924	0.588647	0.371697	13.8531	0.9897	0.30697	1.01416	-0.693946	5.19293	-1.26307	4.18701
RIOK2	Serine/threonine-protein kinase RIO2	Q9BVS4	KFPVPKPIDYNR	PKinase	Protein kinase domain	172	YES	YES	YES	1	1.17183	1.34255	1.19584	0.554184	0.484451	10.5969	0.9074	0.486645	1.1782	-0.854549	2.72193	-1.06618	3.31279
RIOK2	Serine/threonine-protein kinase RIO2	Q9BVS4	ESDIYIVANEEGQQFALK	Protein kinase-like (PK-like)	Protein kinase domain	106	YES	YES	YES	1	1.05458	1.30412	0.781823	0.409504	0.429851	2.03237	0.9179	0.419662	1.11962	-1.16702	1.93317	-1.2191	2.41436
RIPK1	Receptor-interacting serine/threonine-protein kinase 1	Q13546	DLKPENILVDNDFHIK	PKinase	Protein kinase domain	138	YES	YES	YES	1	1.0417	1.03309	0.925833	0.741458	0.632517	9.36993	0.9891	0.584737	1.02819	-0.566285	2.78225	-0.744257	4.06678
RIPK1	Receptor-interacting serine/threonine-protein kinase 1	Q13546	LNNEEHNELR	PKinase	Protein kinase domain	168	NO	YES	YES	1	1.01568	1.00826	1.40562	1.63263	1.88124	4.63049	0.9774	0.976151	1.9645	0.649178	3.0957	0.845381	3.87394
RIPK1	Receptor-interacting serine/threonine-protein kinase 1	Q13546	IADLGLASFK	PKinase	Protein kinase domain	154	YES	YES	YES	1	0.916538	0.907302	0.925095	0.767518	0.684663	13.0586	0.9245	0.665901	0.943241	-0.345636	2.29324	-0.44144	3.04731
RIPK2	Receptor-interacting serine/threonine-protein kinase 2	O43353	IADFGLSK	PKinase	Protein kinase domain	162	YES	YES	YES	1	0.987029	0.663925	0.58274	0.631309	0.568883	0.097784	0.9892	0.594193	0.999514	-0.939862	2.89525	-1.16576	2.88762
RNF123	E3 ubiquitin-protein ligase RNF123	Q5XPI4	AVLSVELDPVEGR	unannotated	unannotated	284	YES	NO	NO	1	0.903758	0.979671	0.959213	0.782446	0.724019	12.3948	0.9198	0.722531	0.96156	-0.328907	2.42737	-0.457806	3.71759
RPAP1	RNA polymerase II-associated protein 1	Q9BWH6	GLRDQEAEQEAQTIHEENIAR	unannotated	unannotated	214	YES	NO	NO	1	0.673626	0.617003	0.554786	0.511055	0.416909	3.69264	0.9939	0.0675899	0.99992	-0.758299	1.65157	-1.0799	2.40903
RPE	Ribulose-phosphate 3-epimerase	Q96AT9	NVCSEAAQKR	unannotated	unannotated	215	NO	NO	NO	1	0.990052	1.07684	1.22318	1.56952	1.49448	2.32799	0.9769	1.02198	1.5324	0.622324	2.08599	0.507247	1.30809
RPL15	Large ribosomal subunit protein eL15	P61313	FFEVILIDPFHK	S24e_L23_L15e	Ribosomal L15	129	YES	NO	NO	1	0.925659	0.833695	0.793944	0.765198	0.665783	6.3391	0.9636	0.52596	1.00213	-0.314273	1.0853	-0.519329	2.00612
RPL18	Large ribosomal subunit protein eL18	Q07020	TNSTFNQVVLK	Ribos_L15p_L18e	Ribosomal protein 60S L18 and 50S L18e	39	NO	NO	NO	1	1.02095	0.972973	1.1145	1.26052	1.45998	19.362	0.9771	0.995813	1.57592	0.327235	4.23674	0.479409	4.45809
RPL18	Large ribosomal subunit protein eL18	Q07020	TNSTFNQVVLKR	Ribos_L15p_L18e	Ribosomal protein 60S L18 and 50S L18e	39	NO	NO	NO	1	0.98085	0.9604	0.97484	1.10074	1.30566	23.0448	0.9909	0.979014	1.30705	0.132426	1.13812	0.319914	3.17656
RPL18	Large ribosomal subunit protein eL18	Q07020	GCGTVLLSGPRK	Ribos_L15p_L18e	Ribosomal protein 60S L18 and 50S L18e	133	NO	NO	NO	1	1.03006	0.947168	0.968655	1.08679	1.26178	24.2492	0.9404	0.98646	1.26568	0.138656	1.17227	0.262484	2.29538
RPL18	Large ribosomal subunit protein eL18	Q07020	VQEVPKLK	Ribos_L15p_L18e	Ribosomal protein 60S L18 and 50S L18e	92	NO	NO	NO	1	0.998809	0.961219	0.990451	1.08032	1.26293	31.7125	0.9844	0.987087	1.29687	0.148214	0.981783	0.342423	2.20524
RPL3	Large ribosomal subunit protein uL3	P39023	LEQQVPVNQVFGQDEMIDVIGVTK	EFTPs	Ribosomal protein L3	201	YES	NO	NO	1	0.897549	0.88121	0.808618	0.770454	0.683845	19.0017	0.9793	0.500226	0.99761	-0.356611	1.8625	-0.403605	2.17813
RPL30	Large ribosomal subunit protein eL30	P62888	KSLESINSR	unannotated	unannotated	9	NO	NO	NO	1	0.926051	1.01491	1.0868	1.28018	1.27014	2.81723	0.9588	0.977574	1.28237	0.317969	2.3797	0.345424	3.63735
RPL30	Large ribosomal subunit protein eL30	P62888	SLESINSR	unannotated	unannotated	10	NO	NO	NO	1	0.964929	1.0286	1.022	1.0797	1.29218	29.1892	0.9644	1.0038	1.30107	0.192478	1.4672	0.403495	3.62656
RPL5	Large ribosomal subunit protein uL18	P46777	VGLTNYAAAYCTGLLLAR	S11_L18p	Ribosomal large subunit proteins 60S L5, and 50S L18	90	NO	NO	NO	1	0.980015	0.936629	1.03595	1.43843	1.56019	8.71172	0.9937	0.972329	1.57506	0.455706	4.33638	0.647623	5.12489
RPL5	Large ribosomal subunit protein uL18	P46777	DIICQIAYAR	S11_L18p	Ribosomal large subunit proteins 60S L5, and 50S L18	59	NO	NO	NO	1	0.984319	0.938298	1.01614	1.36189	1.68518	21.21	0.995	0.974956	1.78069	0.365205	3.3948	0.657073	4.7502
RPL5	Large ribosomal subunit protein uL18	P46777	GAVDGGLSIPHSTK	unannotated	unannotated	165	NO	NO	NO	1	0.947916	0.885644	0.873458	1.2683	1.48567	18.2327	0.966	0.926751	1.48581	0.356491	3.83475	0.601835	4.35869
RPL5	Large ribosomal subunit protein uL18	P46777	IEGDMIVCAAYAHELPK	S11_L18p	Ribosomal large subunit proteins 60S L5, and 50S L18	69	NO	NO	NO	1	1.00811	0.994281	0.914848	1.23279	1.54458	21.2951	0.9796	0.979298	1.54729	0.302847	2.28137	0.539029	3.78153
RPL5	Large ribosomal subunit protein uL18	P46777	GAVDGGLSIPHSTKR	unannotated	unannotated	165	NO	NO	NO	1	0.980249	0.867354	0.850756	1.35308	1.67867	18.9483	0.9674	0.924588	1.67883	0.426288	2.38777	0.753803	3.73192
RPL5	Large ribosomal subunit protein uL18	P46777	QFSQYIK	unannotated	unannotated	222	NO	NO	NO	1	0.820082	0.879856	0.864775	1.12605	1.59203	24.3715	0.9576	0.891161	1.59691	0.366652	1.63828	0.702768	3.43881
RPL5	Large ribosomal subunit protein uL18	P46777	HIMGQNVADYMR	unannotated	unannotated	198	NO	NO	NO	1	0.94144	0.810474	0.941309	1.21912	1.66024	30.6457	0.9597	0.919514	1.78676	0.466177	2.19648	0.712359	3.16675
RPL5	Large ribosomal subunit protein uL18	P46777	YLMEEDEDAYKK	unannotated	unannotated	210	NO	NO	NO	1	1.12965	1.10399	1.07637	1.40445	1.80229	22.2022	0.9794	1.07688	1.82326	0.493997	1.86128	0.68568	2.91364
RPL5	Large ribosomal subunit protein uL18	P46777	NSVTPDMMEEMYKK	unannotated	unannotated	229	NO	NO	NO	1	1.01142	0.808401	1.16439	1.51389	2.38357	78.8255	0.9733	0.961325	3.52011	1.0333	1.85855	1.3756	2.77745
RPL5	Large ribosomal subunit protein uL18	P46777	VTNRDIICQIAYAR	S11_L18p	Ribosomal large subunit proteins 60S L5, and 50S L18	55	NO	NO	NO	1	0.919841	0.843041	0.900866	1.08357	1.40763	24.509	0.9399	0.915917	1.41229	0.226606	1.37322	0.476371	2.73902
RPL5	Large ribosomal subunit protein uL18	P46777	TTTGNKVFGALK	S11_L18p	Ribosomal large subunit proteins 60S L5, and 50S L18	153	NO	NO	NO	1	1.1483	0.933553	0.850709	1.51658	1.66277	14.8311	0.9133	0.983121	1.66299	0.293817	0.616812	0.736345	2.40836
RPL5	Large ribosomal subunit protein uL18	P46777	NSVTPDMMEEMYK	unannotated	unannotated	229	NO	NO	NO	1	0.958555	0.843361	0.838611	1.16544	1.72681	23.806	0.9643	0.910136	1.72802	0.534941	1.37723	0.832955	2.36571
RPL7A	Large ribosomal subunit protein eL8	P62424	AGVNTVTTLVENKK	PELOTA	Ribosomal protein L7Ae/L30e/S12e/Gadd45 family	138	YES	NO	NO	1	0.982064	0.971051	0.863051	0.849706	0.686235	77.3149	0.9345	0.44802	0.997901	-0.328672	1.89477	-0.517597	3.06232
RPS10	Small ribosomal subunit protein eS10	P46783	GYVKEQFAWR	HTH	Plectin/S10 domain	56	NO	NO	NO	1	1.0144	0.93531	0.910601	1.18352	1.36546	19.0436	0.9504	0.965055	1.36642	0.24403	2.8847	0.377651	2.89127
RPS15	Small ribosomal subunit protein uS19	P62841	DMIILPEMVGSMVGVYNGK	Ribosomal_S19	Ribosomal_S19	82	NO	NO	NO	1	1.11197	0.991058	0.947757	1.3157	1.34285	11.787	0.901	1.01268	1.34292	0.487445	3.78253	0.441397	3.61648
RPS15	Small ribosomal subunit protein uS19	P62841	EAPPMEKPEVVK	Ribosomal_S19	Ribosomal_S19	66	NO	NO	NO	1	1.01578	0.962583	0.928818	1.10105	1.28946	22.8269	0.9468	0.976788	1.29202	0.195527	2.24993	0.340712	3.14211
RPS15A	Small ribosomal subunit protein uS8	P62244	HGYIGEFEIIDDHR	Ribosomal_S8	Ribosomal_S8	44	YES	NO	NO	1	0.977052	0.931129	0.876946	0.808825	0.709278	50.2013	0.9912	0.500609	0.999571	-0.306672	2.16095	-0.392977	2.97321
RPS15A	Small ribosomal subunit protein uS8	P62244	MNVLADALK	unannotated	unannotated	4	YES	NO	NO	1	0.943187	0.978395	0.930296	0.854858	0.739454	53.9985	0.9607	0.590377	0.975771	-0.211187	2.26702	-0.347329	2.66877
RPS15A	Small ribosomal subunit protein uS8	P62244	FLTVMMK	Ribosomal_S8	Ribosomal_S8	37	YES	NO	NO	1	0.94298	0.997146	0.887791	0.757023	0.652755	13.7475	0.9707	0.572732	0.984986	-0.283066	1.62158	-0.471214	2.18058
RPS16	Small ribosomal subunit protein uS9	P62249	ALVAYYQK	S5	Ribosomal protein S9/S16	91	NO	NO	NO	1	0.976589	0.959028	0.945445	1.14958	1.36405	20.7744	0.9876	0.970264	1.36428	0.194237	1.46097	0.359839	3.00212
RPS17	Small ribosomal subunit protein eS17	P08708	LGNDFHTNK	Ribosomal_S17e	Ribosomal_S17e	24	NO	NO	NO	1	1.03885	1.04181	1.16642	1.20395	1.26305	1.61999	0.9703	1.00482	1.27227	0.261126	1.8752	0.333139	2.16362
RPS18	Small ribosomal subunit protein uS13	P62269	SLVIPEKFQHILR	unannotated	unannotated	2	NO	NO	NO	1	0.989604	0.898212	0.972873	1.25383	1.49821	19.1615	0.9759	0.963135	1.52233	0.212882	1.55476	0.419567	2.32445
RPS19	Small ribosomal subunit protein eS19	P39019	KLTPQGQR	HTH	Ribosomal protein S19e	122	NO	NO	NO	1	0.834932	0.954046	1.01536	1.32259	1.41619	7.14352	0.9445	0.926531	1.43714	0.271017	1.42406	0.502755	3.46371
RPS19	Small ribosomal subunit protein eS19	P39019	ELAPYDENWFYTR	HTH	Ribosomal protein S19e	44	NO	NO	NO	1	0.997567	0.929988	0.912228	1.16706	1.29823	17.8775	0.9456	0.959959	1.29865	0.306047	2.78033	0.393905	3.29786
RPS19	Small ribosomal subunit protein eS19	P39019	HKELAPYDENWFYTR	HTH	Ribosomal protein S19e	42	NO	NO	NO	1	0.994376	0.894598	0.880593	0.966563	1.31043	48.9923	0.901	0.942424	1.35083	0.108949	0.430889	0.387071	2.99041
RPS19	Small ribosomal subunit protein eS19	P39019	ALAAFLKK	HTH	Ribosomal protein S19e	17	NO	NO	NO	1	1.02122	1.11175	0.972967	1.26104	1.37395	16.4539	0.9164	1.02646	1.37436	0.286517	2.18178	0.346798	2.39183
RPS19	Small ribosomal subunit protein eS19	P39019	GGAGVGSMTK	HTH	Ribosomal protein S19e	68	NO	NO	NO	1	1.04838	1.12861	1.18581	1.81182	1.68899	2.92309	0.9737	1.05915	1.75068	0.515597	1.22062	0.67112	2.33981
RPS20	Small ribosomal subunit protein uS10	P60866	VCADLIR	Ribosomal_S10	Ribosomal_S10	35	NO	NO	NO	1	1.09986	1.02908	1.00769	1.13616	1.31151	22.486	0.9107	1.03416	1.31179	0.207507	1.44674	0.284191	2.15413
RPS25	Small ribosomal subunit protein eS25	P62851	AQVIYTR	HTH	S25 ribosomal protein	105	NO	NO	NO	1	0.850563	0.927188	0.957421	1.15029	1.32815	22.0568	0.9264	0.925514	1.40192	0.252918	3.10199	0.351387	2.48148
RPS29	Small ribosomal subunit protein uS14	P62273	DIGFIKLD	unannotated	unannotated	49	NO	NO	NO	1	0.996778	0.978552	1.05412	1.44934	1.68707	14.1596	0.9992	0.991126	1.74791	0.442468	3.61499	0.64157	4.32644
RPS29	Small ribosomal subunit protein uS14	P62273	KYGLNMCR	Ribosomal_S14	Ribosomal_S14	33	NO	NO	NO	1	1.07457	1.06087	1.07749	1.52817	1.64146	9.36937	0.9919	1.04463	1.64916	0.475529	2.82541	0.710562	4.11859
RPS3	Small ribosomal subunit protein uS3	P23396	RFGFPEGSVELYAEK	KH	KH domain	76	NO	NO	NO	1	1.08967	0.991303	1.0002	1.21102	1.33234	17.5349	0.934	1.02025	1.33321	0.211755	1.98644	0.328287	2.6998
RPS3	Small ribosomal subunit protein uS3	P23396	VKIMLPWDPTGK	unannotated	unannotated	186	NO	NO	NO	1	1.07292	0.900966	1.00687	1.18516	1.42943	25.1474	0.9143	0.993358	1.47094	0.31043	1.92071	0.482764	2.44911
RPS3	Small ribosomal subunit protein uS3	P23396	YKLLGGLAVR	Ribosomal_S3_C	Ribosomal_S3_C	107	NO	NO	NO	1	1.01158	0.933863	0.976074	1.2083	1.38986	18.6175	0.9772	0.980245	1.39289	0.229951	1.64643	0.362914	2.41966
RPS3	Small ribosomal subunit protein uS3	P23396	GCEVVVSGK	Ribosomal_S3_C	Ribosomal_S3_C	133	NO	NO	NO	1	0.910699	0.84382	0.914065	1.18654	1.40279	18.8169	0.9455	0.917099	1.40421	0.275506	1.29386	0.376596	2.22177
RPS3	Small ribosomal subunit protein uS3	P23396	FGFPEGSVELYAEK	KH	KH domain	77	NO	NO	NO	1	1.06723	1.00843	1.04348	1.17235	1.28414	18.9087	0.9559	1.02557	1.31299	0.186246	1.66472	0.264921	2.21802
RPS5	Small ribosomal subunit protein uS7	P46782	RQAVDVSPLR	Ribosomal_S7	Ribosomal_S7	136	NO	NO	NO	1	1.02455	0.890106	0.977293	1.19516	1.37379	18.5036	0.9341	0.97219	1.38342	0.216954	0.746297	0.508429	3.05058
RPS5	Small ribosomal subunit protein uS7	P46782	QAVDVSPLRR	Ribosomal_S7	Ribosomal_S7	137	NO	NO	NO	1	0.897185	0.966186	0.945785	1.141	1.46027	22.9743	0.9746	0.952247	1.46203	0.174469	1.18403	0.448796	3.01377
RPS5	Small ribosomal subunit protein uS7	P46782	AQCPIVER	Ribosomal_S7	Ribosomal_S7	64	NO	NO	NO	1	1.0749	0.952174	1.03951	1.2413	1.41987	19.4371	0.9497	1.01067	1.46657	0.310186	3.19308	0.39892	2.70561
RPS5	Small ribosomal subunit protein uS7	P46782	YLPHSAGR	unannotated	unannotated	48	NO	NO	NO	1	1.00988	0.972147	1.1272	1.3597	1.54193	14.4958	0.9909	0.989529	1.66176	0.284423	1.35104	0.464955	2.45
RPS5	Small ribosomal subunit protein uS7	P46782	VNQAIWLLCTGAR	Ribosomal_S7	Ribosomal_S7	147	NO	NO	NO	1	1.05141	0.978005	0.986925	1.18139	1.26739	16.2603	0.9548	1.00404	1.2679	0.251663	2.33049	0.375706	2.44563
RPS5	Small ribosomal subunit protein uS7	P46782	KAQCPIVER	Ribosomal_S7	Ribosomal_S7	63	NO	NO	NO	1	1.09053	0.987365	1.12378	1.29614	1.28805	2.41124	0.9301	1.02585	1.29231	0.357852	2.58832	0.392085	2.34432
RPS6KA1	Ribosomal protein S6 kinase alpha-1	Q15418	DILADVNHPFVVK	PKinase	Protein kinase domain	114	YES	YES	YES	1	1.0219	0.444619	0.307793	0.270471	0.258824	0.15577	0.9976	0.27903	1.01097	-1.83499	6.81523	-1.88939	6.98075
RPS6KA1	Ribosomal protein S6 kinase alpha-1	Q15418	LGMPQFLSTEAQSLLR	PKinase	Protein kinase domain	279	YES	YES	YES	1	1.07414	0.489458	0.428125	0.419079	0.373297	0.143514	0.9911	0.406835	1.03708	-1.33624	6.61724	-1.40231	6.54001
RPS6KA1	Ribosomal protein S6 kinase alpha-1	Q15418	LGSGPDGAEEIKR	PKinase	Protein kinase domain	305	YES	YES	YES	1	1.12514	0.607699	0.431448	0.446664	0.411792	0.169033	0.9829	0.429941	1.06257	-1.32759	5.09784	-1.41372	5.88626
RPS6KA1	Ribosomal protein S6 kinase alpha-1	Q15418	ETMTLILK	PKinase	Protein kinase domain	269	YES	YES	YES	1	1.04624	0.56708	0.412339	0.375848	0.383613	0.161303	0.9963	0.390596	1.02314	-1.36218	5.72534	-1.34588	5.85473
RPS6KA1	Ribosomal protein S6 kinase alpha-1	Q15418	EASFVLHTIGK	PKinase	Protein kinase domain	511	YES	YES	YES	1	0.981332	0.91703	0.638242	0.375786	0.350425	1.6773	0.9995	0.331777	0.993777	-1.3963	5.86221	-1.48711	5.77785
RPS6KA1	Ribosomal protein S6 kinase alpha-1	Q15418	SKRDPSEEIEILLR	PKinase	Protein kinase domain	452	YES	YES	YES	1	1.04858	1.10017	0.699601	0.384508	0.369415	1.96622	0.9907	0.376954	1.04958	-1.39737	5.65765	-1.45528	5.72881
RPS6KA1	Ribosomal protein S6 kinase alpha-1	Q15418	FTLSGGNWNTVSETAKDLVSK	PKinase	Protein kinase domain	634	YES	YES	YES	1	1.10382	0.958367	0.678687	0.406882	0.372046	1.68485	0.9865	0.358363	1.04852	-1.45144	4.96987	-1.53226	5.49039
RPS6KA1	Ribosomal protein S6 kinase alpha-1	Q15418	TVEYLHSQGVVHR	PKinase	Protein kinase domain	522	YES	YES	YES	1	1.0155	0.952366	0.783812	0.447479	0.352681	4.4255	0.9988	0.31139	1.00531	-1.20336	5.0168	-1.52842	5.48667
RPS6KA1	Ribosomal protein S6 kinase alpha-1	Q15418	EIKPPFKPAVAQPDDTFYFDTEFTSR	Protein kinase-like (PK-like)	Protein kinase domain	333	YES	YES	YES	1	1.00627	0.524993	0.362503	0.311725	0.320286	0.142006	0.9973	0.331233	1.00498	-1.69351	5.2456	-1.68318	5.38232
RPS6KA1	Ribosomal protein S6 kinase alpha-1	Q15418	DLKPSNILYVDESGNPECLR	PKinase	Protein kinase domain	535	YES	YES	YES	1	0.890594	0.954392	0.572583	0.414506	0.376808	1.61851	0.9828	0.395434	0.948322	-1.27869	5.98851	-1.5234	4.76422
RPS6KA1	Ribosomal protein S6 kinase alpha-1	Q15418	DKLPQSQLSHQDLQLVK	Protein kinase-like (PK-like)	Protein kinase domain	679	YES	YES	YES	1	0.952359	1.15302	0.745919	0.482151	0.386591	2.03263	0.9425	0.434363	1.03513	-1.10814	4.40739	-1.36972	4.65523
RPS6KA1	Ribosomal protein S6 kinase alpha-1	Q15418	NLVFSDGYVVK	Protein kinase-like (PK-like)	Protein kinase domain	411	YES	YES	YES	1	1.04556	1.04468	0.824129	0.587449	0.581056	2.06948	0.9943	0.584242	1.03009	-0.671188	4.42197	-0.76377	4.6053
RPS6KA1	Ribosomal protein S6 kinase alpha-1	Q15418	DVYDDGKHVYLVTELMR	PKinase	Protein kinase domain	477	YES	YES	YES	1	0.959525	1.09737	0.671274	0.409578	0.319093	1.94812	0.9736	0.364328	1.01897	-1.40704	4.2218	-1.63789	4.56574
RPS6KA1	Ribosomal protein S6 kinase alpha-1	Q15418	HVFYSTIDWNK	Protein kinase-like (PK-like)	Protein kinase domain	318	YES	YES	YES	1	1.10779	0.383383	0.292107	0.247341	0.273825	0.147342	0.9912	0.271038	1.05387	-1.85176	4.01687	-1.74778	4.55918
RPS6KA1	Ribosomal protein S6 kinase alpha-1	Q15418	ATNMEYAVK	PKinase	Protein kinase domain	439	YES	YES	YES	1	1.06891	0.877911	0.78713	0.58256	0.536995	2.04973	0.9629	0.489663	1.03124	-0.818573	4.48487	-0.906819	4.09852
RPS6KA1	Ribosomal protein S6 kinase alpha-1	Q15418	HVYLVTELMR	PKinase	Protein kinase domain	484	YES	YES	YES	1	0.959084	0.727458	0.786035	0.493981	0.32321	67.2834	0.9384	-0.244272	0.994994	-0.973512	2.12053	-1.24827	2.86207
RPS6KA1	Ribosomal protein S6 kinase alpha-1	Q15418	RDPSEEIEILLR	PKinase	Protein kinase domain	454	YES	YES	YES	1	0.813534	0.813666	0.493386	0.35244	0.256157	1.54764	0.9738	0.135788	0.983706	-1.74038	3.32211	-1.73798	2.85632
RPS6KA3	Ribosomal protein S6 kinase alpha-3	P51812	LHYAFQTEGK	PKinase	Protein kinase domain	133	YES	YES	YES	1	1.07999	0.609421	0.376554	0.407208	0.403572	0.175632	0.9925	0.395778	1.04	-1.39547	6.99069	-1.38175	7.45101
RPS6KA3	Ribosomal protein S6 kinase alpha-3	P51812	DILVEVNHPFIVK	PKinase	Protein kinase domain	120	YES	YES	YES	1	1.0311	0.670648	0.443114	0.359827	0.361585	0.181941	0.9908	0.378739	1.02701	-1.47548	7.10116	-1.47874	7.22123
RPS6KA3	Ribosomal protein S6 kinase alpha-3	P51812	DLKPENILLDEEGHIK	PKinase	Protein kinase domain	193	YES	YES	YES	1	0.863891	0.573963	0.318688	0.337608	0.316754	0.108559	0.9953	0.311226	0.99361	-1.43966	6.24664	-1.54135	6.65144
RPS6KA3	Ribosomal protein S6 kinase alpha-3	P51812	ADPSQFELLK	Protein kinase-like (PK-like)	Protein kinase domain	63	YES	YES	YES	1	1.0221	0.657285	0.445035	0.41786	0.414572	0.181488	0.998	0.425816	1.01107	-1.2434	6.77563	-1.37596	6.58791
RPS6KA3	Ribosomal protein S6 kinase alpha-3	P51812	LGAGPDGVEEIKR	PKinase	Protein kinase domain	311	YES	YES	YES	1	1.01166	0.750217	0.588954	0.559534	0.538639	0.168155	0.9948	0.559357	1.01158	-0.821977	5.98197	-0.813903	5.54745
RPS6KA3	Ribosomal protein S6 kinase alpha-3	P51812	EIHPPFKPATGRPEDTFYFDPEFTAK	Protein kinase-like (PK-like)	Protein kinase domain	339	YES	YES	YES	1	0.870732	0.709471	0.531347	0.443433	0.447256	0.182083	0.9986	0.423063	0.997793	-1.13181	5.74016	-1.0548	5.41211
RPS6KA3	Ribosomal protein S6 kinase alpha-3	P51812	VLGQGSFGK	PKinase	Protein kinase domain	73	YES	YES	YES	1	0.976535	0.63857	0.472054	0.448227	0.456482	0.129574	0.9996	0.456186	1.0019	-1.09728	6.4491	-1.14462	5.3813
RPS6KA3	Ribosomal protein S6 kinase alpha-3	P51812	HSFFSTIDWNK	Protein kinase-like (PK-like)	Protein kinase domain	324	YES	YES	YES	1	1.07838	0.778286	0.62355	0.609126	0.572818	0.181352	0.981	0.601817	1.03922	-0.727735	5.05568	-0.801934	5.13803
RPS6KA3	Ribosomal protein S6 kinase alpha-3	P51812	EVMFTEEDVK	PKinase	Protein kinase domain	162	YES	YES	YES	1	0.951652	0.39271	0.507186	0.411327	0.449001	0.0307255	0.9804	0.440053	0.999952	-1.17465	5.56043	-1.24361	4.59298
RPS6KA3	Ribosomal protein S6 kinase alpha-3	P51812	LGMPQFLSPEAQSLLR	PKinase	Protein kinase domain	285	YES	YES	YES	1	1.04803	0.787803	0.676814	0.585042	0.59588	0.170716	0.9699	0.615031	1.02874	-0.654308	4.07017	-0.632726	4.16275
RPS6KA3	Ribosomal protein S6 kinase alpha-3	P51812	NQSPVLEPVGR	Protein kinase-like (PK-like)	Protein kinase domain	713	NO	YES	YES	1	1.02513	0.989948	1.13391	1.26846	1.25859	2.00676	0.9913	1.00498	1.26371	0.316475	4.47333	0.298126	3.95941
RPS6KA3	Ribosomal protein S6 kinase alpha-3	P51812	MLHVDPHQR	PKinase	Protein kinase domain	659	YES	YES	YES	1	0.916974	1.02567	0.893268	0.778674	0.548851	114.828	0.945	0.0835416	0.978543	-0.590718	1.95434	-1.05453	3.64727
RPS6KA3	Ribosomal protein S6 kinase alpha-3	P51812	GGELLDKILR	PKinase	Protein kinase domain	498	YES	YES	YES	1	1.00039	1.01936	0.787422	0.592139	0.534526	2.15178	0.9931	0.551966	1.01066	-0.680051	3.88246	-0.780542	3.61859
RPS6KA3	Ribosomal protein S6 kinase alpha-3	P51812	YGQHPNIITLK	PKinase	Protein kinase domain	470	YES	YES	YES	1	0.950446	0.984388	0.883956	0.714143	0.59229	14.4135	0.9881	0.496387	0.985048	-0.475766	3.12697	-0.650514	3.5699
RPS6KA3	Ribosomal protein S6 kinase alpha-3	P51812	ETMTMILK	PKinase	Protein kinase domain	275	YES	YES	YES	1	1.03275	0.810383	0.688374	0.723955	0.679792	0.177958	0.9868	0.697373	1.01638	-0.450709	2.97989	-0.538068	3.43684
RPS6KA3	Ribosomal protein S6 kinase alpha-3	P51812	GAMAATYSALNR	Protein kinase-like (PK-like)	Protein kinase domain	701	NO	YES	YES	1	1.07376	1.03053	1.19098	1.26178	1.26846	1.52137	0.9603	1.03449	1.26521	0.340073	3.09076	0.357739	3.34031
RPS6KA3	Ribosomal protein S6 kinase alpha-3	P51812	QDAPHLVK	Protein kinase-like (PK-like)	Protein kinase domain	693	NO	YES	YES	1	0.91093	1.0873	1.2142	1.74345	1.83423	4.68045	0.9837	0.985398	1.87395	0.82132	2.46862	0.967283	3.22145
RPS6KA3	Ribosomal protein S6 kinase alpha-3	P51812	GGDLFTR	PKinase	Protein kinase domain	152	YES	YES	YES	1	0.839644	0.864614	0.482339	0.505139	0.434218	0.468593	0.9475	0.468552	0.920494	-1.44227	2.40473	-1.53176	3.15757
RPS6KA3	Ribosomal protein S6 kinase alpha-3	P51812	LYLILDFLR	PKinase	Protein kinase domain	143	YES	YES	YES	1	1.07472	0.558469	0.460515	0.426759	0.424502	0.154914	0.9919	0.437256	1.03737	-1.0558	4.53612	-1.46872	2.88388
RPS6KB1	Ribosomal protein S6 kinase beta-1	P23443	IRPECFELLR	Protein kinase-like (PK-like)	Protein kinase domain	86	YES	YES	YES	1	0.976262	0.970725	0.572197	0.422535	0.354875	1.2468	0.995	0.384535	0.991557	-1.31949	6.15934	-1.52619	7.54938
RPS6KB1	Ribosomal protein S6 kinase beta-1	P23443	LGAGPGDAGEVQAHPFFR	Protein kinase-like (PK-like)	Protein kinase domain	336	YES	YES	YES	1	0.988741	0.921406	0.570031	0.429521	0.428883	0.867792	0.9999	0.423821	0.996611	-1.15808	5.86276	-1.31064	5.41837
RPS6KB1	Ribosomal protein S6 kinase beta-1	P23443	HINWEELLAR	Protein kinase-like (PK-like)	Protein kinase domain	354	YES	YES	YES	1	1.03908	0.864645	0.591135	0.433281	0.43137	0.681535	0.9939	0.419985	1.02496	-1.08137	5.24032	-1.25088	5.32823
RPS6KB1	Ribosomal protein S6 kinase beta-1	P23443	LNLPPYLTQEAR	PKinase	Protein kinase domain	310	YES	YES	YES	1	1.07545	0.857539	0.348837	0.342485	0.276584	0.373672	0.9921	0.310809	1.03881	-1.79277	3.05443	-1.94589	4.52023
RPS6KB2	Ribosomal protein S6 kinase beta-2	Q9UBS0	VDPPFRPCLQSEEDVSQFDTR	Protein kinase-like (PK-like)	Protein kinase domain	341	YES	YES	YES	1	1.01765	1.11826	0.879325	0.682396	0.721048	2.02856	0.9412	0.701718	1.0453	-0.57806	2.1273	-0.686338	2.60146
RPS6KB2	Ribosomal protein S6 kinase beta-2	Q9UBS0	ESIHEGAVTHTFCGTIEYMAPEILVR	PKinase	Protein kinase domain	218	YES	YES	YES	1	1.00541	0.798404	0.817349	0.603595	0.612205	1.33014	0.9071	0.540466	1.01283	-0.737888	1.7559	-0.87462	2.44606
SCAMP4	Secretory carrier-associated membrane protein 4	Q969E2	AQTEWNTGTWR	unannotated	unannotated	186	NO	NO	NO	1	1.08824	1.06958	1.02288	1.22395	1.45112	21.7748	0.9655	1.04515	1.45509	0.320782	2.5153	0.451885	2.94745
SCCPDH	Saccharopine dehydrogenase-like oxidoreductase	Q8NBX0	SAIYGFGDQSNLR	GADPH_aa-bio_dh	Saccharopine dehydrogenase C-terminal domain	199	YES	NO	NO	1	1.0411	0.955124	0.839146	0.520888	0.353225	9.73728	0.9955	0.234804	1.01668	-0.967037	3.22671	-1.27897	4.3276
SEC13	Protein SEC13 homolog	P55735	NGGQILIADLR	unannotated	unannotated	44	YES	NO	NO	1	0.924908	1.0688	1.06325	0.905025	0.410476	29.1401	0.9556	0.406307	1.01424	-0.26628	1.3064	-1.15392	2.76057
SEC16A	Protein transport protein Sec16A	O15027	QGYPEGYYSSK	unannotated	unannotated	1236	NO	NO	NO	1	0.884862	2.16449	2.28071	2.80129	3.47827	2.25576	0.9147	0.889218	3.89526	0.768506	0.800553	1.29239	2.17742
SEPTIN8	Septin-8	Q92599	ELHEKFEHLK	unannotated	unannotated	365	YES	NO	NO	1	1.17396	0.677591	0.453782	0.626053	0.409859	0.173177	0.9107	0.496569	1.08699	-0.362014	0.524697	-1.00807	2.03355
SHKBP1	SH3KBP1-binding protein 1	Q8TBC3	ISLTSLHSASSNTSLSGHR	unannotated	unannotated	627	NO	NO	NO	1	1.15759	1.29565	1.38899	1.48833	1.50594	0.161179	0.9979	0.9993	1.54581	0.765173	2.2504	0.807426	2.25123
SLC7A1	High affinity cationic amino acid transporter 1	P30825	VLLNIGQQMLR	unannotated	unannotated	5	NO	NO	NO	1	0.996219	1.02437	1.04773	1.17012	1.2644	17.5483	0.9956	1.00201	1.32727	0.169411	0.764697	0.323068	2.0033
SLK	STE20-like serine/threonine-protein kinase	Q9H2G2	AGNILFTLDGDIK	PKinase	Protein kinase domain	158	YES	YES	YES	1	0.294149	0.247733	0.22871	0.144976	0.110293	0.139275	0.9983	-0.480523	0.999994	-2.71825	7.80155	-3.07705	7.66369
SLK	STE20-like serine/threonine-protein kinase	Q9H2G2	SEPPTLAQPSR	PKinase	Protein kinase domain	250	YES	YES	YES	1	0.235534	0.250919	0.207457	0.277661	0.283553	2.51827e+13	0.9917	1.00001	-0.500451	-1.9614	7.69953	-2.26874	3.71599
SLK	STE20-like serine/threonine-protein kinase	Q9H2G2	ELIAEAK	Protein kinase-like (PK-like)	Protein kinase domain	302	YES	YES	YES	1	0.53573	0.4096	0.518135	0.603752	0.494725	119235	0.9091	1.00521	0.0189884	-0.943421	2.70727	-1.06549	3.58159
SMARCA4	Transcription activator BRG1	P51532	ELPEYYELIR	Bromodomain	Bromodomain	1493	NO	NO	NO	1	1.01317	0.906903	1.08221	1.53408	1.58072	4.72675	0.9837	0.973532	1.57966	0.666825	3.30968	0.786642	3.99272
SMARCD1	SWI/SNF-related matrix-associated actin-dependent regulator of chromatin subfamily D member 1	Q96GM5	AGFQSVAPSGGAGASGGAGAAAALGPGGTPGPPVR	unannotated	unannotated	5	YES	NO	NO	1	0.870006	0.989067	0.808647	0.662876	0.594488	3.33235	0.9113	0.598072	0.955857	-0.905509	2.32707	-0.793257	1.92929
SMC3	Structural maintenance of chromosomes protein 3	Q9UQE7	EKINELLK	P-loop_NTPase	RecF/RecN/SMC N terminal domain	187	NO	NO	NO	1	1.53758	1.99956	2.2834	2.00334	2.52142	0.0335297	0.9108	0.998259	2.30733	0.648109	0.74081	1.20873	2.47226
SPTA1	Spectrin alpha chain	P02549	DLNTNEPR	Spectrin	Spectrin	1126	NO	NO	NO	1	0.739685	0.942535	1.81313	2.0216	1.61639	0.423883	0.917	0.86987	1.81887	0.725137	1.59148	0.744308	2.57701
SRA1	Steroid receptor RNA activator 1	Q9HD15	VAAPQDGSPR	unannotated	unannotated	41	NO	NO	NO	1	0.894835	1.10328	1.40453	1.33743	1.40121	0.233003	0.9654	0.947398	1.3811	0.226259	0.868128	0.429102	2.24959
SRPK1	SRSF protein kinase 1	Q96SB4	SNYQGLPLPCVK	PKinase	Protein kinase domain	179	YES	YES	YES	1	0.969897	0.446323	0.0403502	0.0400066	0.0133399	0.169186	0.9997	0.0255517	0.999295	-5.01519	6.57004	-6.08063	8.11047
SRPK1	SRSF protein kinase 1	Q96SB4	SAEHYTETALDEIR	PKinase	Protein kinase domain	113	YES	YES	YES	1	1.02663	0.660892	0.18072	0.078814	0.0642792	0.309423	0.9977	0.072813	1.02777	-3.54304	7.41294	-4.25458	6.85631
SRPK1	SRSF protein kinase 1	Q96SB4	ATAAECLR	PKinase	Protein kinase domain	642	YES	YES	YES	1	0.816187	0.545607	0.198115	0.139925	0.10264	0.175509	0.997	0.0934784	0.991996	-2.87882	8.30623	-3.10111	6.80191
SRPK1	SRSF protein kinase 1	Q96SB4	IIHTDIKPENILLSVNEQYIR	Protein kinase-like (PK-like)	Protein kinase domain	209	YES	YES	YES	1	0.911576	0.979365	0.131309	0.0329288	0.0240415	1.38916	0.9965	0.0284881	0.963651	-4.72849	6.21837	-5.1477	5.98996
SRPK1	SRSF protein kinase 1	Q96SB4	IIQQVLQGLDYLHTK	PKinase	Protein kinase domain	192	YES	YES	YES	1	0.918669	0.524302	0.222126	0.0522874	0.135832	0.187041	0.9927	0.097264	1.00873	-3.944	4.44039	-3.08688	5.49822
SRPK1	SRSF protein kinase 1	Q96SB4	KIIQQVLQGLDYLHTK	PKinase	Protein kinase domain	191	YES	YES	YES	1	0.945648	0.609304	0.135265	0.0506157	0.0724849	0.268967	0.9995	0.0575331	0.99428	-4.09883	6.03486	-4.18437	5.38596
SRPK1	SRSF protein kinase 1	Q96SB4	STAGNFLVNPLEPK	Protein kinase-like (PK-like)	Protein kinase domain	473	YES	YES	YES	1	1.02004	0.967996	0.781247	0.750612	0.721959	0.66286	0.9936	0.734765	1.01069	-0.428559	4.49392	-0.446886	5.01095
SRPK2	SRSF protein kinase 2	P78362	IGDLFNGR	Protein kinase-like (PK-like)	Protein kinase domain	73	YES	YES	YES	1	0.966146	0.637197	0.225981	0.127142	0.0862199	0.298961	0.999	0.099459	1.01051	-3.12567	8.62513	-3.48057	8.20587
SRPK2	SRSF protein kinase 2	P78362	IADLGNACWVHK	PKinase	Protein kinase domain	528	YES	YES	YES	1	1.01612	0.636849	0.216778	0.0936	0.100404	0.283238	0.9969	0.0997083	1.02725	-3.36541	8.57146	-3.56394	6.85891
SRPK2	SRSF protein kinase 2	P78362	HFTEDIQTR	PKinase	Protein kinase domain	540	YES	YES	YES	1	1.01774	0.678229	0.373897	0.33027	0.354234	0.199075	0.9981	0.349252	1.01336	-1.44174	5.71788	-1.52885	5.22478
SRPK2	SRSF protein kinase 2	P78362	IADLGNACWVHKHFTEDIQTR	PKinase	Protein kinase domain	528	YES	YES	YES	1	1.1621	1.18294	0.55935	0.209093	0.195831	1.82173	0.9808	0.20248	1.11497	-2.02962	4.36999	-2.19606	4.75642
SRPK2	SRSF protein kinase 2	P78362	LKPWSLFDVLVEK	PKinase	Protein kinase domain	636	YES	YES	YES	1	1.1119	0.85625	0.198863	0.188952	0.233269	0.254767	0.9923	0.207016	1.05594	-2.61282	4.76526	-2.11388	4.59636
SRPK2	SRSF protein kinase 2	P78362	MAAEATEWQK	Protein kinase-like (PK-like)	Protein kinase domain	232	NO	YES	YES	1	1.05733	1.2748	1.29727	1.36186	1.36475	0.0706553	0.9801	0.997137	1.346	0.469182	2.8093	0.537451	3.18444
SSR3	Translocon-associated protein subunit gamma	Q9UNL2	QQSEEDLLLQDFSR	unannotated	unannotated	9	NO	NO	NO	1	1.0353	1.07998	0.992373	1.21612	1.52345	23.4996	0.9769	1.02686	1.52888	0.485978	1.58963	0.664847	2.38124
STK24	Serine/threonine-protein kinase 24	Q9Y6E0	KTSYLTELIDR	Protein kinase-like (PK-like)	Protein kinase domain	292	YES	YES	YES	1	1.0215	0.886767	0.581064	0.576951	0.511508	0.393296	0.991	0.543404	1.01293	-0.865892	5.89784	-0.976517	6.79604
STK24	Serine/threonine-protein kinase 24	Q9Y6E0	LADFGVAGQLTDTQIKR	PKinase	Protein kinase domain	172	YES	YES	YES	1	0.937574	0.892941	0.548725	0.513439	0.482997	0.548042	0.9921	0.496279	0.971193	-0.95431	7.02918	-0.983666	6.71459
STK24	Serine/threonine-protein kinase 24	Q9Y6E0	TSYLTELIDR	Protein kinase-like (PK-like)	Protein kinase domain	293	YES	YES	YES	1	1.04341	0.826963	0.649761	0.578006	0.515657	0.381926	0.978	0.540306	1.03099	-0.86995	5.49896	-0.915252	6.51628
STK24	Serine/threonine-protein kinase 24	Q9Y6E0	AANVLLSEHGEVK	PKinase	Protein kinase domain	159	YES	YES	YES	1	1.00636	0.647867	0.473919	0.445204	0.414344	0.149968	0.9954	0.442841	1.00867	-1.08166	6.01545	-1.16614	5.69786
STK24	Serine/threonine-protein kinase 24	Q9Y6E0	LADFGVAGQLTDTQIK	PKinase	Protein kinase domain	172	YES	YES	YES	1	0.805121	0.728002	0.520915	0.457769	0.441391	0.181871	0.9872	0.392667	0.995508	-1.2124	4.36017	-1.19474	5.61775
STK24	Serine/threonine-protein kinase 24	Q9Y6E0	ADIWSLGITAIELAR	PKinase	Protein kinase domain	212	YES	YES	YES	1	1.05476	0.617448	0.518836	0.418558	0.407683	0.166765	0.9783	0.448358	1.02739	-1.12673	4.6616	-1.20788	5.37951
STK24	Serine/threonine-protein kinase 24	Q9Y6E0	NNPPTLEGNYSKPLK	PKinase	Protein kinase domain	246	YES	YES	YES	1	0.99792	0.437462	0.170353	0.191877	0.186876	0.167516	0.9997	0.183031	0.998991	-2.23607	3.41268	-2.4126	3.58364
STK24	Serine/threonine-protein kinase 24	Q9Y6E0	ADPEELFTKLEK	Protein kinase-like (PK-like)	Protein kinase domain	30	YES	YES	YES	1	0.926038	0.896096	0.710407	0.394046	0.239591	7.79152	0.997	0.0752103	0.979835	-1.30692	2.9984	-1.9128	3.47335
STK24	Serine/threonine-protein kinase 24	Q9Y6E0	GLDYLHSEK	PKinase	Protein kinase domain	143	YES	YES	YES	1	1.20812	0.923074	0.423722	0.324094	0.467197	0.313471	0.9514	0.402061	1.10393	-1.49152	3.20204	-2.63532	1.18778
STK25	Serine/threonine-protein kinase 25	O00506	AANVLLSEQGDVK	PKinase	Protein kinase domain	143	YES	YES	YES	1	0.986582	0.880259	0.622993	0.588212	0.518529	0.503151	0.9911	0.545753	1.00068	-0.801275	6.9812	-0.919672	6.35379
STK25	Serine/threonine-protein kinase 25	O00506	ADIWSLGITAIELAK	PKinase	Protein kinase domain	196	YES	YES	YES	1	1.07998	0.7647	0.591023	0.515443	0.513991	0.189704	0.977	0.540114	1.04002	-0.981084	5.16656	-1.08702	5.38581
STK25	Serine/threonine-protein kinase 25	O00506	TSFLTELIDR	Protein kinase-like (PK-like)	Protein kinase domain	277	YES	YES	YES	1	1.08059	0.677318	0.500864	0.38251	0.469913	0.178549	0.9748	0.451081	1.04032	-1.96092	2.25094	-0.970988	3.77048
STK26	Serine/threonine-protein kinase 26	Q9P289	EFIDACLNKDPSFRPTAK	PKinase	Protein kinase domain	249	YES	YES	YES	1	0.982213	0.85437	0.508036	0.455194	0.460679	0.414245	0.9998	0.456539	0.994966	-1.21803	6.40705	-1.19776	6.34522
STK26	Serine/threonine-protein kinase 26	Q9P289	NNPPTLVGDFTK	PKinase	Protein kinase domain	234	YES	YES	YES	1	1.07382	0.956169	0.691511	0.629669	0.589075	0.666968	0.983	0.606181	1.03714	-0.729456	5.81294	-0.777657	5.69973
STK26	Serine/threonine-protein kinase 26	Q9P289	AGPFDEFQIATMLK	PKinase	Protein kinase domain	113	YES	YES	YES	1	0.792652	0.778201	0.531407	0.530706	0.408024	1.08799	0.9542	0.262044	0.998221	-0.97133	4.72747	-1.10297	4.17136
STK26	Serine/threonine-protein kinase 26	Q9P289	SFKEFIDACLNKDPSFRPTAK	PKinase	Protein kinase domain	246	YES	YES	YES	1	1.05527	1.01736	0.727573	0.578369	0.668315	1.35793	0.9736	0.623319	1.02497	-0.838633	4.08117	-0.729307	3.428
STK26	Serine/threonine-protein kinase 26	Q9P289	TSYLTELIDRFKR	Protein kinase-like (PK-like)	Protein kinase domain	281	NO	YES	YES	1	1.26449	3.8927	4.32042	3.67945	4.89507	0.0717177	0.9449	1.00022	4.30008	1.84086	2.49375	2.20079	3.39408
STK26	Serine/threonine-protein kinase 26	Q9P289	GEPPNSDMHPMR	PKinase	Protein kinase domain	215	YES	YES	YES	1	1.1579	0.917211	0.496192	0.286289	0.431854	0.577414	0.9586	0.361726	1.07686	-1.81985	3.35913	-1.24602	2.54661
STK26	Serine/threonine-protein kinase 26	Q9P289	TSYLTELIDRFK	Protein kinase-like (PK-like)	Protein kinase domain	281	YES	YES	YES	1	1.23982	1.22764	0.450172	0.540067	0.463495	0.660754	0.9425	0.484571	1.15584	-1.31211	1.9607	-1.44243	2.43982
STK32C	Serine/threonine-protein kinase 32C	Q86UX6	DVKPDNILLDER	PKinase	Protein kinase domain	216	YES	YES	YES	1	0.775134	0.80108	0.303623	0.087835	0.0847074	0.912614	0.97	0.0728018	0.900621	-3.24916	3.9157	-3.53413	5.9337
STK38	Serine/threonine-protein kinase 38	Q15208	SNSFFEGVDWEHIR	Protein kinase-like (PK-like)	Protein kinase domain	378	YES	YES	YES	1	0.971125	0.340964	0.129755	0.0382568	0.0403582	0.11839	0.9954	0.0651979	1.00908	-4.54787	6.47041	-4.54416	7.36916
STK38	Serine/threonine-protein kinase 38	Q15208	LSDFGLCTGLK	PKinase	Protein kinase domain	228	YES	YES	YES	1	0.97624	0.568089	0.250844	0.15216	0.129436	0.2023	0.9965	0.146822	1.01997	-2.84764	6.73221	-3.06266	7.16153
STK38	Serine/threonine-protein kinase 38	Q15208	LGLEDFESLK	Protein kinase-like (PK-like)	Protein kinase domain	84	YES	YES	YES	1	0.911605	0.295488	0.182864	0.102859	0.0748048	0.0817688	0.9937	0.11602	1.00372	-3.08753	6.26271	-3.5004	5.71629
STK38	Serine/threonine-protein kinase 38	Q15208	DIKPDNLLLDSK	PKinase	Protein kinase domain	212	YES	YES	YES	1	1.19015	0.416312	0.094589	0.108342	0.0709053	0.172698	0.9848	0.0912911	1.09508	-3.59546	5.28979	-3.75217	5.36851
STK38	Serine/threonine-protein kinase 38	Q15208	IGAPGVEEIKSNSFFEGVDWEHIR	Protein kinase-like (PK-like)	Protein kinase domain	368	YES	YES	YES	1	0.812667	0.454325	0.393374	0.371808	0.254382	0.0505065	0.9772	0.328347	1.0027	-1.77746	3.06201	-1.94558	3.28081
STK38	Serine/threonine-protein kinase 38	Q15208	TRLGLEDFESLKVIGR	Protein kinase-like (PK-like)	Protein kinase domain	82	YES	YES	YES	1	1.01119	0.524722	0.315555	0.434931	0.430272	0.153935	0.9804	0.393557	1.00562	-1.24204	2.81078	-1.46115	2.85022
STK38L	Serine/threonine-protein kinase 38-like	Q9Y2H1	DIKPDNLLLDAK	PKinase	Protein kinase domain	213	YES	YES	YES	1	0.994416	1.0117	0.388393	0.135196	0.11039	1.7035	0.9995	0.122791	1.00204	-3.15835	5.36032	-3.22988	7.49877
STK38L	Serine/threonine-protein kinase 38-like	Q9Y2H1	LGLDDFESLK	Protein kinase-like (PK-like)	Protein kinase domain	85	YES	YES	YES	1	0.933717	0.784974	0.380077	0.0903198	0.0602751	0.999502	0.9992	0.026139	0.988363	-3.51506	7.18773	-4.25233	6.60486
STK38L	Serine/threonine-protein kinase 38-like	Q9Y2H1	IGNSGVEEIKGHPFFEGVDWEHIR	Protein kinase-like (PK-like)	Protein kinase domain	369	YES	YES	YES	1	0.954533	1.03025	0.109896	0.0590429	0.0582236	1.29141	0.9977	0.0586331	0.99493	-3.89246	5.36508	-3.84798	5.43617
STK38L	Serine/threonine-protein kinase 38-like	Q9Y2H1	MFYSFQDKR	PKinase	Protein kinase domain	153	YES	YES	YES	1	0.942655	0.991684	0.493346	0.0559431	0.0424122	1.96287	0.9981	0.0491687	0.978119	-3.80241	5.21613	-4.17734	5.37959
SURF4	Surfeit locus protein 4	O15260	SMFAGVPTMR	DoxD-like	SURF4 family	140	NO	NO	NO	1	0.94587	0.916801	1.02622	1.32055	1.37993	6.06296	0.981	0.954319	1.3844	0.366629	2.76632	0.504857	4.42595
SYK	Tyrosine-protein kinase SYK	P43405	WYAPECINYYK	PKinase	Protein kinase domain	538	YES	YES	YES	1	0.568898	0.108903	0.112957	0.139913	0.0772661	0.0203431	0.9972	0.109714	1	-3.27971	4.57955	-3.55036	5.41958
SYK	Tyrosine-protein kinase SYK	P43405	NVLLVTQHYAK	PKinase	Protein kinase domain	499	YES	YES	YES	1	0.611531	0.32793	0.370986	0.297325	0.274191	0.0165807	0.9873	0.312374	1.00005	-1.49711	2.51026	-1.52479	2.53033
TAB1	TGF-beta-activated kinase 1 and MAP3K7-binding protein 1	Q15750	LWSVDHGEQSVVTAP	unannotated	unannotated	490	YES	NO	NO	1	1.0457	0.910751	0.462322	0.319013	0.297454	0.751816	0.9976	0.302514	1.02473	-1.68113	5.53468	-1.5765	5.02505
TAOK1	Serine/threonine-protein kinase TAO1	Q7L7X3	ELDNLQYR	Catalytic domain of the Serine/Threonine Kinase	Protein kinase domain	303	NO	YES	YES	1	1.4128	1.45183	1.58372	1.52543	1.57592	0.00120475	0.9794	0.99886	1.58836	0.456094	2.22375	0.524137	2.8271
TAOK3	Serine/threonine-protein kinase TAO3	Q9H2K8	VLIDLIQR	Protein kinase-like (PK-like)	Protein kinase domain	285	YES	YES	YES	1	0.644918	0.227624	0.232386	0.202223	0.171711	0.0231217	0.9968	0.201204	1.00004	-2.21956	8.23626	-2.51726	9.57645
TAOK3	Serine/threonine-protein kinase TAO3	Q9H2K8	IPQERPTSAELLR	PKinase	Protein kinase domain	261	YES	YES	YES	1	0.57163	0.143497	0.127279	0.0746793	0.0378298	0.0227289	0.9952	0.0751366	1.00029	-3.12323	3.7018	-4.16565	4.32047
TAOK3	Serine/threonine-protein kinase TAO3	Q9H2K8	FVDYCLQK	PKinase	Protein kinase domain	253	YES	YES	YES	1	0.192977	0.31345	0.174442	0.276689	0.247423	6.37041e+11	0.973	1.00136	-0.518639	-1.95305	3.16035	-2.14181	3.17741
TBK1	Serine/threonine-protein kinase TBK1	Q9UHD2	LFAIEEETTTR	PKinase	Protein kinase domain	70	YES	YES	YES	1	0.943892	0.806892	0.741517	0.689412	0.673163	0.141687	0.9927	0.676954	1.00387	-0.521233	4.15062	-0.56434	4.28521
TBK1	Serine/threonine-protein kinase TBK1	Q9UHD2	LTDFGAAR	PKinase	Protein kinase domain	155	YES	YES	YES	1	0.871433	0.694997	0.697589	0.683641	0.6159	0.0307083	0.9652	0.662429	1.00048	-0.710281	3.54132	-0.728857	3.58427
TBK1	Serine/threonine-protein kinase TBK1	Q9UHD2	TGDLFAIK	PKinase	Protein kinase domain	31	YES	YES	YES	1	0.877087	0.68677	0.748809	0.660484	0.701575	0.0220423	0.9531	0.699394	1	-0.748354	2.99117	-0.634176	2.75471
TEC	Tyrosine-protein kinase Tec	P42680	ELGSGLFGVVR	PKinase	Protein kinase domain	375	YES	YES	YES	1	0.956434	0.909045	0.652301	0.468305	0.32012	3.47045	0.9933	0.239124	1.00249	-1.08643	4.28151	-1.80353	4.1537
TEC	Tyrosine-protein kinase Tec	P42680	WCPPEVFNYSR	PKinase	Protein kinase domain	531	YES	YES	YES	1	1.09117	0.723626	0.61612	0.376343	0.253033	1.37196	0.9463	0.196873	1.04976	-1.01614	1.89021	-1.45433	2.30328
TFAM	Transcription factor A	Q00059	LRSPFSFVYLPR	unannotated	unannotated	29	NO	NO	NO	1	0.598114	0.818174	0.580712	0.805416	9.39713	59.9516	0.9981	0.749251	10.193	0.734636	0.473762	3.43134	2.58542
TLK1	Serine/threonine-protein kinase tousled-like 1	Q9UKI8	YLLLHLLGR	Protein kinase-like (PK-like)	Protein kinase domain	456	YES	YES	YES	1	0.998442	0.408318	0.239696	0.194053	0.149632	0.126567	0.995	0.193632	1.0057	-2.23161	5.1434	-2.60052	4.96546
TLK1	Serine/threonine-protein kinase tousled-like 1	Q9UKI8	SIVMQIVNALR	PKinase	Protein kinase domain	563	YES	YES	YES	1	1.02516	0.303791	0.137437	0.192186	0.204131	0.144628	0.9967	0.177916	1.01259	-2.38868	4.78584	-2.49592	4.80412
TLK1	Serine/threonine-protein kinase tousled-like 1	Q9UKI8	ATEVQFPVKPVVSSEAK	PKinase	Protein kinase domain	692	YES	YES	YES	1	1.08953	0.296956	0.162964	0.0956378	0.134498	0.152611	0.994	0.131036	1.04477	-3.2592	3.9396	-2.93404	3.58489
TLN1	Talin-1	Q9Y490	CVSCLPGQR	unannotated	unannotated	1199	NO	NO	NO	1	1.07379	1.02512	1.27354	1.25243	1.29094	0.716468	0.9601	1.03281	1.27286	0.329741	2.33356	0.278276	1.82956
TMEM263	Transmembrane protein 263	Q8WUH6	GAVGATIGGVAWIGGK	UPF0444	UPF0444	48	NO	NO	NO	1	1.157	1.09468	1.01344	1.33124	1.64175	21.017	0.9458	1.06627	1.64463	0.498222	2.73456	0.869521	4.01489
TMEM263	Transmembrane protein 263	Q8WUH6	VTGGIFSVTK	UPF0444	UPF0444	38	NO	NO	NO	1	1.03104	0.971334	0.949568	1.519	1.76912	16.6196	0.9938	0.987951	1.76966	0.5483	2.90863	0.7639	3.78443
TMEM263	Transmembrane protein 263	Q8WUH6	TAVTTVPSMGIGLVK	UPF0444	UPF0444	70	NO	NO	NO	1	1.09351	1.07031	1.02158	1.48553	1.9609	20.5494	0.9924	1.04624	1.96572	0.553918	2.50136	0.884588	2.94184
TOMM22	Mitochondrial import receptor subunit TOM22 homolog	Q9NS69	LWGLTEMFPER	Tom22	Tom22	48	NO	NO	NO	1	0.882791	0.732472	1.17218	1.68276	1.93217	6.51528	0.9568	0.874146	1.97346	0.890909	2.78539	1.05915	3.07748
TPD52L2	Tumor protein D54	O43399	SFEDRVGTIK	unannotated	unannotated	166	YES	NO	NO	1	1.00058	0.881864	0.954832	0.81769	0.557481	25.0425	0.9338	0.549532	0.959406	-0.248374	1.00251	-0.637249	2.14026
TPX2	Targeting protein for Xklp2	Q9ULW0	KLALAGIGQPVKK	unannotated	unannotated	237	NO	NO	NO	1	1.49346	1.45624	1.62234	1.88727	2.1393	4.6008	0.9485	1.01026	2.57454	-0.187304	0.079826	0.908714	2.38806
TPX2	Targeting protein for Xklp2	Q9ULW0	MQQEVVEMR	unannotated	unannotated	221	NO	NO	NO	1	1.16356	1.2208	1.28813	1.35016	1.61583	5.4938	0.9056	1.00506	1.74964	0.325678	1.54488	0.523745	2.11715
TRMT10C	tRNA methyltransferase 10 homolog C	Q7L0Y3	EFIEMWR	unannotated	unannotated	96	NO	NO	NO	1	1.12265	1.16158	1.30833	1.25864	1.30528	0.0617888	0.936	1.00099	1.30446	0.305434	2.02965	0.371912	2.33038
TSEN54	tRNA-splicing endonuclease subunit Sen54	Q7Z6J9	RWNFEQISFPNMASDSR	unannotated	unannotated	295	NO	NO	NO	1	2.24133	1.46026	2.00743	5.76815	5.22238	3.00366	0.9543	1.56716	5.49532	1.89685	2.2608	1.46634	1.34952
TSFM	Elongation factor Ts	P43897	GFLNSSELSGLPAGPDREGSLKDQLALAIGK	EF_TS	EF_TS	162	YES	NO	NO	1	0.842218	0.795883	0.755726	0.654342	0.694842	0.0904561	0.9667	0.62254	0.999379	-0.581897	2.1459	-0.354876	1.34134
UBR4	E3 ubiquitin-protein ligase UBR4	Q5T4S7	AVEMTDQLMVPTLGSQEGAFENVR	unannotated	unannotated	1851	YES	NO	NO	1	0.790477	0.624834	0.50046	0.355348	0.41317	0.0983587	0.987	0.357436	0.998876	-1.25938	3.00181	-1.03494	2.88009
UBR4	E3 ubiquitin-protein ligase UBR4	Q5T4S7	SQQNDEEPVATSQLLKPHTTSSPPDMSPFFLR	unannotated	unannotated	3111	YES	NO	NO	1	0.795696	0.766481	0.588254	0.565676	0.617588	0.0452137	0.944	0.565788	0.996665	-0.899838	3.1042	-0.665277	1.34967
ULK1	Serine/threonine-protein kinase ULK1	O75385	TLVPTIPR	PKinase	Protein kinase domain	238	YES	YES	YES	1	0.949741	0.602814	0.472212	0.577793	0.372499	0.0932997	0.9356	0.472148	1.00008	-0.862444	2.08416	-1.12816	2.47958
ULK3	Serine/threonine-protein kinase ULK3	Q6PHR2	ASVENLLTEIEILK	PKinase	Protein kinase domain	54	YES	YES	YES	1	0.880197	0.581344	0.470815	0.44036	0.370486	0.081427	0.9898	0.411187	1.00411	-1.03988	2.89782	-1.27818	3.2055
UNC13B	Protein unc-13 homolog B	O14795	VYFDETAQEIVDEFAMR	unannotated	unannotated	776	YES	NO	NO	1	0.827468	0.33691	0.197989	0.133703	0.14763	0.0661198	0.9983	0.151423	1.0017	-2.67214	4.47273	-2.61931	4.05237
USP39	Ubiquitin carboxyl-terminal hydrolase 39	Q53GS9	NTTYDLIANIVHDGKPSEGSYR	Peptidase_CA	Ubiquitin carboxyl-terminal hydrolase	494	YES	NO	NO	1	0.819737	0.412359	0.474947	0.456649	0.252041	0.032168	0.9226	0.393543	1.00011	-1.04628	1.08852	-2.60095	3.01746
USP4	Ubiquitin carboxyl-terminal hydrolase 4	Q13107	DKLDTVVEFPIR	Peptidase_CA	Ubiquitin carboxyl-terminal hydrolase	836	YES	NO	NO	1	1.07311	1.10672	0.933733	0.826231	0.74083	4.40765	0.91	0.743452	1.05926	-0.319043	1.47131	-0.647064	2.17931
UTP15	U3 small nucleolar RNA-associated protein 15 homolog	Q8TED0	AGYKPVAIQTYPILGEK	unannotated	unannotated	2	NO	NO	NO	1	1.14582	1.13651	1.20638	1.44791	1.47597	2.93669	0.9341	1.02292	1.57269	0.46143	3.09099	0.430876	2.08163
VASP	Vasodilator-stimulated phosphoprotein	P50552	VPAQSESVR	unannotated	unannotated	299	NO	NO	NO	1	0.97855	1.06261	1.34615	1.29067	1.28777	0.27042	0.9823	0.989259	1.30822	0.186815	0.777061	0.352284	2.04712
VCL	Vinculin	P18206	AQQVSQGLDVLTAK	unannotated	unannotated	353	YES	NO	NO	1	0.968459	1.04036	1.09815	1.08547	0.664868	86.3085	0.9051	0.482878	1.03856	0.145127	0.817111	-0.448623	2.10849
VIPAS39	Spermatogenesis-defective protein 39 homolog	Q9H9C1	LLLDLFR	TPR	Vps16, C-terminal region	239	YES	NO	NO	1	0.928907	0.466662	0.26626	0.256669	0.241607	0.103404	0.9998	0.25016	1.00051	-1.7416	5.27453	-1.98066	6.56484
VRK1	Serine/threonine-protein kinase VRK1	Q99986	ASNLLLNYKNPDQVYLVDYGLAYR	PKinase	Protein kinase domain	180	YES	YES	YES	1	0.80961	1.01563	0.552256	0.245185	0.150972	1.95809	0.9562	0.198063	0.941755	-2.43576	3.17677	-2.96916	4.53101
VRK1	Serine/threonine-protein kinase VRK1	Q99986	HLAEQFAVGEIITDMAK	Protein kinase-like (PK-like)	Protein kinase domain	18	YES	YES	YES	1	1.27963	1.35555	0.628982	0.366335	0.206285	1.80695	0.9278	0.286302	1.21173	-1.52746	3.3341	-2.12221	3.36858
VRK1	Serine/threonine-protein kinase VRK1	Q99986	DILLQGLK	Protein kinase-like (PK-like)	Protein kinase domain	322	YES	YES	YES	1	1.00408	0.973245	0.767093	0.548381	0.441762	3.67499	0.9971	0.408548	1.01146	-0.996958	4.56492	-1.71756	2.54175
WBP4	WW domain-binding protein 4	O75554	EFAAMEAAALK	unannotated	unannotated	64	NO	NO	NO	1	1.31004	1.05375	1.75914	2.04848	2.26873	1.73048	0.9439	1.12104	2.159	0.821447	2.14915	0.787018	1.7932
WEE1	Wee1-like protein kinase	P30291	DLLLQVGR	PKinase	Protein kinase domain	405	YES	YES	YES	1	1.00889	1.05034	0.538742	0.336548	0.287632	1.7393	0.9958	0.312088	1.01975	-1.53164	5.41904	-1.77814	5.87937
WEE1	Wee1-like protein kinase	P30291	IGSGEFGSVFK	PKinase	Protein kinase domain	305	YES	YES	YES	1	0.7918	0.845089	0.569562	0.322218	0.265937	3.47593	0.9611	0.969232	0.0727763	-2.462	1.93161	-1.68319	4.62767
WEE1	Wee1-like protein kinase	P30291	FLANEVLQENYTHLPK	PKinase	Protein kinase domain	482	YES	YES	YES	1	1.00241	1.27907	0.72658	0.31184	0.377777	2.01817	0.9266	0.344795	1.09385	-1.48583	2.05692	-1.27539	2.39159
XRCC5	X-ray repair cross-complementing protein 5	P13010	SQLDIIIHSLKK	vWA-like	Ku70/Ku80 N-terminal alpha/beta domain	145	YES	NO	NO	1	0.973095	0.967427	0.91845	0.759149	0.724633	5.1793	0.9932	0.714611	0.983011	-0.415435	4.79682	-0.489722	4.97932
XRCC5	X-ray repair cross-complementing protein 5	P13010	RHIEIFTDLSSR	vWA-like	Ku70/Ku80 N-terminal alpha/beta domain	130	YES	NO	NO	1	1.00216	0.982943	0.960399	0.777573	0.670325	13.7229	0.9984	0.63394	0.996804	-0.404266	4.15177	-0.572946	4.8733
XRCC5	X-ray repair cross-complementing protein 5	P13010	TDTLEDLFPTTKIPNPR	unannotated	unannotated	470	YES	NO	NO	1	0.937054	0.991116	0.908438	0.722595	0.706631	3.72817	0.9723	0.707607	0.976322	-0.423524	4.69296	-0.504158	4.81606
XRCC5	X-ray repair cross-complementing protein 5	P13010	ANPQVGVAFPHIK	SPOC	Ku70/Ku80 beta-barrel domain	401	YES	NO	NO	1	0.950927	0.930181	0.826238	0.725042	0.643906	13.7007	0.9961	0.484335	0.997513	-0.594255	3.56154	-0.751361	4.41156
XRCC5	X-ray repair cross-complementing protein 5	P13010	RFFMGNQVLK	SPOC	Ku70/Ku80 beta-barrel domain	354	YES	NO	NO	1	1.01652	0.981088	1.03428	0.672196	0.610988	14.9677	0.9915	0.610982	1.00797	-0.569114	3.48295	-0.853829	4.33191
XRCC5	X-ray repair cross-complementing protein 5	P13010	LTIGSNLSIR	unannotated	unannotated	251	YES	NO	NO	1	1.00932	1.02006	0.984613	0.767953	0.744289	6.29503	0.9975	0.743299	1.00981	-0.377939	3.6041	-0.501201	4.25325
XRCC5	X-ray repair cross-complementing protein 5	P13010	HIEIFTDLSSR	vWA-like	Ku70/Ku80 N-terminal alpha/beta domain	131	YES	NO	NO	1	0.957393	1.07693	0.980604	0.75554	0.706984	7.79946	0.9314	0.703883	1.01068	-0.378792	3.63911	-0.468652	4.1066
XRCC5	X-ray repair cross-complementing protein 5	P13010	EPLPPIQQHIWNMLNPPAEVTTK	Ku_C	Ku_C	503	YES	NO	NO	1	1.01625	0.975115	0.92068	0.732212	0.642034	9.41599	0.9964	0.591026	1.00433	-0.544313	4.23823	-0.641507	4.06
XRCC5	X-ray repair cross-complementing protein 5	P13010	YGSDIVPFSK	SPOC	Ku70/Ku80 beta-barrel domain	316	YES	NO	NO	1	0.974978	0.94364	0.96071	0.755356	0.697441	10.1195	0.9808	0.693225	0.97326	-0.337774	2.99057	-0.456822	4.0279
XRCC5	X-ray repair cross-complementing protein 5	P13010	KKDQVTAQEIFQDNHEDGPTAK	Ku_C	Ku_C	544	YES	NO	NO	1	0.959805	0.872504	0.809625	0.603014	0.55626	5.75924	0.9858	0.423477	0.996083	-0.875522	3.87766	-0.918811	3.95165
XRCC5	X-ray repair cross-complementing protein 5	P13010	LGGHGPSFPLK	vWA-like	Ku70/Ku80 N-terminal alpha/beta domain	185	YES	NO	NO	1	1.01911	0.971294	0.870109	0.69797	0.658775	3.37277	0.9967	0.639779	1.00782	-0.499906	2.67242	-0.605168	3.94201
XRCC5	X-ray repair cross-complementing protein 5	P13010	TDTLEDLFPTTK	unannotated	unannotated	470	YES	NO	NO	1	0.9862	0.909614	0.845226	0.806738	0.727085	4.50159	0.9736	0.655101	1.00666	-0.345263	2.29264	-0.473181	3.49976
XRCC5	X-ray repair cross-complementing protein 5	P13010	EDIIQGFR	SPOC	Ku70/Ku80 beta-barrel domain	308	YES	NO	NO	1	0.964498	0.978786	0.789341	0.670735	0.497553	28.9107	0.9785	0.224921	1.00438	-0.751319	1.93217	-0.811983	3.21807
XRCC5	X-ray repair cross-complementing protein 5	P13010	YAPTEAQLNAVDALIDSMSLAK	unannotated	unannotated	444	YES	NO	NO	1	1.03552	1.07273	0.929759	0.802206	0.678493	13.5107	0.9571	0.609648	1.0353	-0.422269	2.86258	-0.549429	3.16305
XRCC5	X-ray repair cross-complementing protein 5	P13010	KDEKTDTLEDLFPTTK	unannotated	unannotated	466	YES	NO	NO	1	1.05137	1.13699	0.90168	0.660904	0.701058	2.13009	0.944	0.680976	1.06279	-0.637753	2.85459	-0.677717	3.03974
XRCC5	X-ray repair cross-complementing protein 5	P13010	AAVVLCMDVGFTMSNSIPGIESPFEQAKK	unannotated	unannotated	8	YES	NO	NO	1	1.12028	0.853081	0.42641	0.429139	0.399442	0.244066	0.9853	0.418245	1.06015	-1.24831	2.59727	-1.34213	2.85636
XRCC5	X-ray repair cross-complementing protein 5	P13010	ETVYCLNDDDETEVLKEDIIQGFR	SPOC	Ku70/Ku80 beta-barrel domain	292	YES	NO	NO	1	1.00042	0.978037	0.797008	0.667786	0.674001	1.44924	0.9992	0.666957	0.99949	-0.69455	2.58232	-0.731493	2.74825
XRCC5	X-ray repair cross-complementing protein 5	P13010	CFSVLGFCK	SPOC	Ku70/Ku80 beta-barrel domain	339	YES	NO	NO	1	0.982393	0.915792	0.955247	0.816001	0.736323	14.2848	0.928	0.71573	0.968675	-0.290004	1.75349	-0.450176	2.65243
XRCC5	X-ray repair cross-complementing protein 5	P13010	SQLDIIIHSLK	vWA-like	Ku70/Ku80 N-terminal alpha/beta domain	145	YES	NO	NO	1	0.964097	1.0082	0.926986	0.715509	0.665974	5.95887	0.9891	0.659861	0.991259	-0.469625	2.73282	-0.523597	2.35143
XRCC5	X-ray repair cross-complementing protein 5	P13010	HSIHWPCR	unannotated	unannotated	243	YES	NO	NO	1	0.918619	0.939741	0.803501	0.749211	0.719176	1.4349	0.9519	0.679299	0.989144	-0.369357	2.15117	-0.483741	2.26926
XRCC6	X-ray repair cross-complementing protein 6	P12956	TFNTSTGGLLLPSDTK	SPOC	Ku70/Ku80 beta-barrel domain	302	YES	NO	NO	1	0.986942	0.967901	0.932088	0.76315	0.730019	5.48655	0.9942	0.722138	0.987012	-0.365816	4.78148	-0.461417	5.07299
XRCC6	X-ray repair cross-complementing protein 6	P12956	KMPFTEK	SPOC	Ku70/Ku80 beta-barrel domain	445	YES	NO	NO	1	0.945004	1.00335	0.940486	0.814891	0.741919	11.6576	0.9586	0.716208	0.982862	-0.314817	3.42527	-0.437305	4.79623
XRCC6	X-ray repair cross-complementing protein 6	P12956	SDSFENPVLQQHFR	Ku_C	Ku_C	475	YES	NO	NO	1	0.943884	0.994912	0.992958	0.800384	0.73968	14.825	0.9679	0.739571	0.982985	-0.331527	4.04629	-0.429443	4.34349
XRCC6	X-ray repair cross-complementing protein 6	P12956	LGSLVDEFK	Ku_C	Ku_C	518	YES	NO	NO	1	0.925544	1.04146	0.918389	0.754285	0.696449	6.23714	0.9192	0.690401	0.987961	-0.331935	2.95077	-0.46356	4.2326
XRCC6	X-ray repair cross-complementing protein 6	P12956	SGWESYYK	unannotated	unannotated	2	NO	NO	NO	1	0.87143	1.17685	1.24091	1.47935	1.80545	28.1684	0.9407	0.956492	2.22477	0.552939	3.86449	0.72361	3.71384
XRCC6	X-ray repair cross-complementing protein 6	P12956	IQVTPPGFQLVFLPFADDKR	SPOC	Ku70/Ku80 beta-barrel domain	425	YES	NO	NO	1	0.94646	1.00901	0.902654	0.651937	0.669204	2.49946	0.9814	0.660562	0.985155	-0.481518	2.85351	-0.586582	3.63715
XRCC6	X-ray repair cross-complementing protein 6	P12956	NLEALALDLMEPEQAVDLTLPK	Ku_C	Ku_C	489	YES	NO	NO	1	0.906828	0.986543	0.871977	0.618954	0.642031	2.48148	0.962	0.630471	0.964462	-0.688295	2.3972	-0.802241	3.42162
XRCC6	X-ray repair cross-complementing protein 6	P12956	ELVYPPDYNPEGK	Ku_C	Ku_C	527	YES	NO	NO	1	1.04416	1.03138	0.960249	0.763322	0.73679	4.53389	0.9886	0.735081	1.02578	-0.386295	2.63096	-0.446286	3.29642
XRCC6	X-ray repair cross-complementing protein 6	P12956	NIPPYFVALVPQEEELDDQK	SPOC	Ku70/Ku80 beta-barrel domain	405	YES	NO	NO	1	1.01326	0.833778	0.831626	0.751439	0.475051	216.991	0.9067	-0.144294	0.986159	-0.706451	1.83305	-1.10948	3.09376
XRCC6	X-ray repair cross-complementing protein 6	P12956	QIILEKEETEELK	SPOC	Ku70/Ku80 beta-barrel domain	326	YES	NO	NO	1	0.94928	1.09969	0.827851	0.685572	0.708816	1.86358	0.9127	0.697194	1.01632	-0.552878	3.39563	-0.660444	2.73831
XRCC6	X-ray repair cross-complementing protein 6	P12956	QIILEKEETEELKR	SPOC	Ku70/Ku80 beta-barrel domain	326	YES	NO	NO	1	1.00608	1.10762	0.893638	0.752721	0.721473	2.03613	0.9333	0.737092	1.0379	-0.539905	2.87983	-0.502204	2.60281
XRCC6	X-ray repair cross-complementing protein 6	P12956	IMATPEQVGK	unannotated	unannotated	452	YES	NO	NO	1	1.02634	0.968027	0.929273	0.793243	0.741724	6.92541	0.9847	0.701637	1.00854	-0.285718	2.1117	-0.307168	1.88135
XRCC6	X-ray repair cross-complementing protein 6	P12956	NLEALALDLMEPEQAVDLTLPKVEAMNKR	Ku_C	Ku_C	489	YES	NO	NO	1	1.00491	1.00002	0.948055	0.669712	0.73736	2.64921	0.9795	0.703535	1.00165	-0.680605	2.19	-0.525259	1.53331
YTHDF2	YTH domain-containing family protein 2	Q9Y5A9	APGMNTIDQGMAALK	unannotated	unannotated	179	NO	NO	NO	1	1.0579	1.09554	1.049	1.14721	1.68676	25.9798	0.9859	1.05061	1.68685	0.246654	0.696902	0.778981	2.65244
ZC3H7A	Zinc finger CCCH domain-containing protein 7A	Q8IWR0	NLFNEGNDVYR	unannotated	unannotated	45	NO	NO	NO	1	1.15941	1.18152	1.3338	1.35841	1.34473	0.0867988	0.9605	1.00294	1.38364	0.324984	1.53378	0.365933	2.26519
ZPR1	Zinc finger protein ZPR1	O75312	FTTLEGLLK	Zn_Beta_Ribbon	ZPR1 zinc-finger domain	351	YES	NO	NO	1	0.913904	1.08485	1.05334	0.828868	0.562249	21.814	0.9101	0.561709	1.01309	-0.224025	0.855013	-0.998701	3.43082

## Sheet: B STU-responsive segments
Gene names	Protein names	Uniprot entry	Sequence	IsKinase		Sequence start position	IsStabilized	Ratio_E2 treatment vs Vehicle						EC50 (uM)	R2	lower	upper	Bayes T-test
				KinHub	Uniprot			0nM vs. 0nM	20nM vs. 0nM	200nM vs. 0nM	2uM vs. 0nM	20uM vs. 0nM	100uM vs. 0nM					Log2FC_Conc_Final	-Log10P.Value_Conc_Final
XRCC5	X-ray repair cross-complementing protein 5	P13010	LTIGSNLSIR	NO	NO	251	YES	1	0.992	0.975263	0.877465	0.714341	0.658069	4.58181	0.9999	0.633421	0.998131	-0.501201	4.25325
XRCC6	X-ray repair cross-complementing protein 6	P12956	SDSFENPVLQQHFR	NO	NO	475	YES	1	0.974891	1.00364	0.912437	0.734967	0.695043	4.61289	0.9932	0.690554	0.994233	-0.429443	4.34349
CAD	Multifunctional protein CAD	P27708	TLGVDLVALATR	NO	NO	1229	YES	1	0.943288	0.963903	0.937889	0.793697	0.638929	35.0601	0.9833	0.504629	0.971767	-0.497184	3.2503
BLVRB	Flavin reductase (NADPH)	P30043	LQAVTDDHIR	NO	NO	125	YES	1	0.899617	0.807412	0.713966	0.329189	0.272095	6.2144	0.9753	0.0704823	0.971813	-1.20629	6.79263
CLUH	Clustered mitochondria protein homolog	O75153	HYILDLLR	NO	NO	561	YES	1	0.958926	0.82377	0.693901	0.387817	0.286172	5.51485	0.9935	0.104108	0.998769	-1.67356	5.54777
FECH	Ferrochelatase	P22830	LFLDRDLMTLPIQNK	NO	NO	92	YES	1	0.962814	0.814616	0.600487	0.478098	0.375146	0.962486	0.9948	0.351852	1.00948	-1.44194	6.40476
OSBPL6	Oxysterol-binding protein-related protein 6	Q9BZF3	AGSKPFNPVLGETYECIR	NO	NO	643	YES	1	1.0217	0.767228	0.534031	0.517423	0.41883	0.248089	0.9811	0.470243	1.02312	-1.46027	5.8823
CCNB1	G2/mitotic-specific cyclin-B1	P14635	ISTLPQLNSALVQDLAK	NO	NO	412	YES	1	0.944626	0.75635	0.714337	0.678446	0.559147	0.319213	0.9384	0.563256	1.00946	-0.661623	4.17961
PBDC1	Protein PBDC1	Q9BVG4	LISSVDPQFLK	NO	NO	53	YES	1	0.992014	0.940955	0.906808	0.744294	0.515514	108.612	0.9941	0.0284434	0.988203	-0.507232	3.10185
UBR4	E3 ubiquitin-protein ligase UBR4	Q5T4S7	SQQNDEEPVATSQLLKPHTTSSPPDMSPFFLR	NO	NO	3111	YES	1	0.793086	0.695658	0.544357	0.460512	0.515379	0.0730224	0.9815	0.462689	0.997123	-0.899838	3.1042
ACACA	Acetyl-CoA carboxylase 1	Q13085	LGTPELSTAERK	NO	NO	2151	NO	1	1.01204	0.961214	1.01489	1.30079	1.43777	12.9453	0.9926	0.991456	1.45425	0.464027	3.75779
ACTN4	Alpha-actinin-4	O43707	TINEVENQILTR	NO	NO	746	NO	1	0.888086	0.960484	1.24098	1.68114	1.71115	2.69998	0.9907	0.945078	1.71367	0.81411	4.48814
AP2M1	AP-2 complex subunit mu	Q96CW1	EEQSQITSQVTGQIGWR	NO	NO	146	NO	1	1.15211	1.35656	1.32059	1.36944	1.48547	0.0768917	0.9147	0.996418	1.48855	0.581274	3.66951
DCUN1D5	DCN1-like protein 5	Q9BTE7	SMLALLLGR	NO	NO	164	NO	1	0.913676	0.922141	1.11074	2.32632	3.12578	15.5219	0.9988	0.943273	3.32878	2.00072	7.09
HSPA1A	Heat shock 70 kDa protein 1A	P0DMV8	LLQDFFNGR	NO	NO	349	NO	1	1.14359	1.19054	1.42258	1.65028	1.67272	1.42268	0.9866	1.01948	1.773	0.516526	3.12513
MARS1	Methionine--tRNA ligase	P56192	GFVLQDTVEQLR	NO	NO	377	NO	1	0.992547	1.00073	0.968819	1.22907	1.32723	15.7345	0.9942	0.99048	1.32751	0.461526	4.69898
MYBBP1A	Myb-binding protein 1A	Q9BQG0	LLGAALPLLTK	NO	NO	308	NO	1	1.02662	1.00209	1.0237	1.21252	1.3055	13.2164	0.9948	1.00954	1.31662	0.375812	3.14948
NOLC1	Nucleolar and coiled-body phosphoprotein 1	Q14978	GGSISVQVNSIKFDSE	NO	NO	684	NO	1	1.0387	1.03588	1.34152	1.36161	1.29514	0.403402	0.9788	1.01919	1.33289	0.424169	3.09456
OSBP	Oxysterol-binding protein 1	P22059	FVPYSYFSR	NO	NO	613	NO	1	0.945273	0.859945	1.07002	1.92703	2.64142	19.2804	0.9956	0.935974	2.87913	1.21252	6.77219
OSBPL9	Oxysterol-binding protein-related protein 9	Q96SU4	VVLPTFILER	NO	NO	391	NO	1	0.997022	0.956906	1.0952	1.31702	1.38435	5.02958	0.9888	0.983382	1.39164	0.469724	3.0351
P4HB	Protein disulfide-isomerase	P07237	ALAPEYAK	NO	NO	58	NO	1	0.974582	0.963791	1.13136	1.55202	1.80953	12.3124	0.9973	0.974949	1.92446	0.652461	4.47345
PNPO	Pyridoxine-5'-phosphate oxidase	Q9NVS9	SSQIGAVVSHQSSVIPDREYLR	NO	NO	164	NO	1	0.848693	1.45089	2.06532	6.62935	6.55464	2.90309	0.9947	1.09963	6.59289	1.78691	8.44235
PRDX6	Peroxiredoxin-6	P30041	LSILYPATTGR	NO	NO	145	NO	1	1.03326	1.0221	1.02982	1.20409	1.48921	27.7267	0.9967	1.01997	1.53635	0.59425	4.60612
RPL18	Large ribosomal subunit protein eL18	Q07020	TNSTFNQVVLKR	NO	NO	39	NO	1	1.00767	0.96044	1.01211	1.13209	1.32259	31.1159	0.9843	0.991757	1.39214	0.319914	3.17656
RPL30	Large ribosomal subunit protein eL30	P62888	SLESINSR	NO	NO	10	NO	1	0.94549	1.02176	1.0544	1.17994	1.28116	13.0203	0.9676	0.979552	1.3458	0.403495	3.62656
RPL5	Large ribosomal subunit protein uL18	P46777	VGLTNYAAAYCTGLLLAR	NO	NO	90	NO	1	0.985825	0.90374	0.944015	1.30696	1.68247	20.3144	0.9876	0.958393	1.6828	0.647623	5.12489
RPS15	Small ribosomal subunit protein uS19	P62841	EAPPMEKPEVVK	NO	NO	66	NO	1	1.06387	0.976821	0.938287	1.20838	1.31616	16.6495	0.924	0.994723	1.31658	0.340712	3.14211
RPS29	Small ribosomal subunit protein uS14	P62273	DIGFIKLD	NO	NO	49	NO	1	1.03567	1.01971	1.06581	1.48876	1.66427	11.2558	0.9985	1.01784	1.68954	0.64157	4.32644
TMEM263	Transmembrane protein 263	Q8WUH6	VTGGIFSVTK	NO	NO	38	NO	1	1.09385	1.04544	0.994863	1.44526	1.79059	19.0768	0.9877	1.03348	1.7925	0.7639	3.78443
XRCC6	X-ray repair cross-complementing protein 6	P12956	SGWESYYK	NO	NO	2	NO	1	0.87143	1.17685	1.24091	1.47935	1.80545	28.4984	0.9408	0.956472	2.22293	0.552939	3.86449
PRKAR1A	cAMP-dependent protein kinase type I-alpha regulatory subunit	P10644	ILMGSTLR	NO	NO	234	NO	1	1.11151	1.17051	1.48886	1.60692	1.59983	0.589301	0.9865	1.03856	1.61622	0.601993	4.21006
STK25	Serine/threonine-protein kinase 25	O00506	ADIWSLGITAIELAK	YES	YES	196	YES	1	1.04905	0.774093	0.571627	0.495388	0.500811	0.218717	0.9864	0.510974	1.03211	-1.08702	5.38581
CHEK1	Serine/threonine-protein kinase Chk1	O14757	ISDFGLATVFR	YES	YES	146	YES	1	0.856347	0.362283	0.307975	0.236243	0.255829	0.0543094	0.9957	0.263914	1.00087	-1.52305	5.52543
AURKA	Aurora kinase A	O14965	DIKPENLLLGSAGELK	YES	YES	256	YES	1	0.738505	0.260941	0.24929	0.257723	0.193053	0.0294942	0.9957	0.232924	1.00002	-1.92041	4.23071
GAK	Cyclin-G-associated kinase	O14976	LSIAEVVHQLQEIAAAR	YES	YES	304	YES	1	0.965456	0.489306	0.322193	0.346692	0.330209	0.104077	0.9992	0.332132	0.998858	-1.49472	5.69769
OXSR1	Serine/threonine-protein kinase OSR1	O95747	EVLEGLEYLHK	YES	YES	129	YES	1	0.941994	0.94946	0.824677	0.6427	0.559241	6.05194	0.9917	0.494744	0.981357	-0.469077	4.19414
LATS1	Serine/threonine-protein kinase LATS1	O95835	TLGIGAFGEVCLAR	YES	YES	710	YES	1	0.861221	0.385842	0.304979	0.194026	0.202813	0.0685293	0.9902	0.22511	1.0041	-2.65935	3.8827
PAK4	Serine/threonine-protein kinase PAK 4	O96013	AALQLVVDPGDPR	YES	YES	306	YES	1	0.899528	0.500956	0.405124	0.272383	0.234039	0.104401	0.9798	0.273255	1.01437	-1.93834	7.01169
PRKCB	Protein kinase C beta type	P05771	YIDWEKLER	YES	YES	602	YES	1	0.801406	0.310193	0.183043	0.150149	0.148747	0.0554794	0.9996	0.154955	1.00059	-3.24484	8.05829
CDK1	Cyclin-dependent kinase 1	P06493	HPNIVSLQDVLMQDSR	YES	YES	60	YES	1	0.967502	0.87629	0.738604	0.67851	0.673183	0.389663	0.9998	0.666621	0.998844	-0.744981	4.7245
PRKCA	Protein kinase C alpha type	P17252	GTEELYAIK	YES	YES	360	YES	1	1.00861	0.672633	0.291654	0.143823	0.123362	0.350542	0.9964	0.126903	1.02661	-2.64159	6.94641
PRKACA	cAMP-dependent protein kinase catalytic subunit alpha	P17612	KWESPAQNTAHLDQFER	YES	YES	30	YES	1	0.912514	0.886948	0.613732	0.333025	0.22287	2.98185	0.9952	0.15273	0.978418	-2.00752	5.81714
EIF2AK2	Interferon-induced	P19525	IGDFGLVTSLK	YES	YES	430	YES	1	0.957492	0.938513	0.83664	0.523407	0.457669	4.95675	0.9949	0.437259	0.971569	-1.16574	6.77502
EIF2AK2	Interferon-induced	P19525	FGMDFKEIELIGSGGFGQVFK	YES	YES	263	NO	1	2.30264	1.18213	5.01671	4.8415	4.29782	0.615876	0.9243	1.49479	4.71876	2.28431	3.58618
CSNK2A2	Casein kinase II subunit alpha'	P19784	VLGTEELYGYLK	YES	YES	249	YES	1	0.995283	0.79111	0.344955	0.260765	0.301159	0.374113	0.9985	0.28061	1.00305	-0.916216	5.95144
RPS6KB1	Ribosomal protein S6 kinase beta-1	P23443	HINWEELLAR	YES	YES	354	YES	1	1.01988	0.903579	0.52055	0.406955	0.372928	0.714328	0.9985	0.383659	1.01309	-1.25088	5.32823
CDK2	Cyclin-dependent kinase 2	P24941	AALAHPFFQDVTKPVPHLRL	YES	YES	279	YES	1	0.913704	0.289599	0.125988	0.0832986	0.0704979	0.0867148	0.9987	0.0897092	1.00207	-3.10488	8.72009
GRK2	Beta-adrenergic receptor kinase 1	P25098	LGYLLFR	YES	YES	63	YES	1	0.927319	0.86717	0.678249	0.639483	0.527835	1.16647	0.977	0.490905	1.00078	-0.601529	3.80274
MAPK1	Mitogen-activated protein kinase 1	P28482	AAAAAAGAGPEMVR	YES	YES	2	YES	1	1.00594	0.979502	0.993447	0.760597	0.551045	19.4059	0.9978	0.542104	0.995235	-0.730083	6.07137
MAPK1	Mitogen-activated protein kinase 1	P28482	NYLLSLPHK	YES	YES	262	NO	1	1.01941	1.07595	1.33263	1.6363	1.53822	1.6905	0.9799	1.02243	1.5922	0.674553	3.57692
WEE1	Wee1-like protein kinase	P30291	DLLLQVGR	YES	YES	405	YES	1	0.934367	1.05817	0.611628	0.323535	0.310448	1.90423	0.9865	0.316991	0.997511	-1.77814	5.87937
AKT1	RAC-alpha serine/threonine-protein kinase	P31749	FYGAEIVSALDYLHSEK	YES	YES	252	YES	1	1.0027	0.991577	1.03048	0.523265	0.433467	14.8258	0.9977	0.433453	1.00619	-1.07424	5.90211
AKT2	RAC-beta serine/threonine-protein kinase	P31751	FYGAEIVSALEYLHSR	YES	YES	254	YES	1	1.09096	1.0689	0.798742	0.37643	0.323422	3.01746	0.9914	0.327959	1.05651	-2.29039	6.02217
MAP2K2	Dual specificity mitogen-activated protein kinase kinase 2	P36507	ISELGAGNGGVVTK	YES	YES	75	YES	1	1.00871	0.869317	0.773683	0.689643	0.619521	0.98569	0.9783	0.605513	1.01566	-0.478231	4.29395
MAP2K2	Dual specificity mitogen-activated protein kinase kinase 2	P36507	RSEVEEVDFAGWLCK	YES	YES	371	NO	1	1.06091	1.24417	1.29899	1.35948	1.3969	0.124075	0.9806	0.993099	1.37896	0.525269	3.67382
CSK	Tyrosine-protein kinase CSK	P41240	GSLVDYLR	YES	YES	272	YES	1	1.01112	0.877503	0.735283	0.614749	0.637548	0.551507	0.9878	0.618108	1.013	-0.529604	3.1391
PRKCI	Protein kinase C iota type	P41743	ASSSLGLQDFDLLR	YES	YES	245	YES	1	0.980881	0.514748	0.388313	0.327373	0.222062	0.116037	0.9768	0.306965	1.01294	-2.35013	5.06336
ABL2	Tyrosine-protein kinase ABL2	P42684	TLKEDTMEVEEFLK	YES	YES	318	YES	1	1.04336	0.836067	0.245642	0.192183	0.219225	0.385584	0.9983	0.206624	1.02289	-3.11523	4.13129
SYK	Tyrosine-protein kinase SYK	P43405	WYAPECINYYK	YES	YES	538	YES	1	0.590214	0.218417	0.241972	0.218619	0.175729	0.019217	0.9958	0.211867	1	-3.55036	5.41958
GSK3A	Glycogen synthase kinase-3 alpha	P49840	VTTVVATLGQGPER	YES	YES	100	YES	1	0.904231	0.422801	0.204444	0.194467	0.180058	0.0985166	0.9999	0.186651	1.00009	-0.839698	5.83129
GSK3B	Glycogen synthase kinase-3 beta	P49841	LLEYTPTAR	YES	YES	320	YES	1	0.942198	0.275978	0.133791	0.0960985	0.107489	0.0874637	0.9993	0.111067	1.00095	-2.82146	7.43948
CDK9	Cyclin-dependent kinase 9	P50750	IGQGTFGEVFK	YES	YES	25	YES	1	0.924029	0.350388	0.273427	0.255984	0.217163	0.0696334	0.9976	0.247783	1.00058	-1.53486	6.12053
RPS6KA3	Ribosomal protein S6 kinase alpha-3	P51812	LGMPQFLSPEAQSLLR	YES	YES	285	YES	1	0.984314	0.739454	0.573698	0.52	0.485671	0.190065	0.9931	0.506972	1.01334	-0.632726	4.16275
RPS6KA3	Ribosomal protein S6 kinase alpha-3	P51812	NQSPVLEPVGR	YES	YES	713	NO	1	1.00327	1.03592	1.17969	1.42456	1.45376	3.00169	0.999	1.00498	1.46665	0.316475	4.47333
PLK1	Serine/threonine-protein kinase PLK1	P53350	LGNLFLNEDLEVK	YES	YES	179	YES	1	1.00845	0.834403	0.493937	0.377782	0.390434	0.484937	0.9986	0.379947	1.01157	-1.08496	3.6136
MAPK10	Mitogen-activated protein kinase 10	P53779	DLKPSNIVVK	YES	YES	189	YES	1	0.982223	0.830185	0.375353	0.191603	0.119303	0.798295	0.9986	0.13202	1.00308	-4.10858	5.79778
SRPK2	SRSF protein kinase 2	P78362	IGDLFNGR	YES	YES	73	YES	1	1.0548	0.798293	0.314974	0.189811	0.193991	0.452173	0.9965	0.190147	1.03326	-3.12567	8.62513
SRPK2	SRSF protein kinase 2	P78362	MAAEATEWQK	YES	YES	232	NO	1	1.05733	1.2748	1.29727	1.36186	1.36475	0.0706553	0.9801	0.997137	1.346	0.537451	3.18444
CDK6	Cyclin-dependent kinase 6	Q00534	ILDVIGLPGEEDWPR	YES	YES	231	NO	1	0.9898	1.03531	1.14907	1.34466	1.40952	4.27175	0.9989	0.99443	1.44253	0.462948	4.02873
CDK5	Cyclin-dependent kinase 5	Q00535	DLKPQNLLINR	YES	YES	126	YES	1	0.890867	0.195479	0.119898	0.128465	0.108418	0.0569757	0.9998	0.118538	1	-2.77621	8.83107
MAP2K1	Dual specificity mitogen-activated protein kinase kinase 1	Q02750	DVKPSNILVNSR	YES	YES	190	YES	1	0.926677	0.862768	0.770502	0.64489	0.545735	23.9926	0.9997	0.262024	0.999113	-0.466092	4.56207
MAP2K1	Dual specificity mitogen-activated protein kinase kinase 1	Q02750	YPIPPPDAK	YES	YES	261	NO	1	0.946501	1.8022	1.68447	1.86199	1.94437	0.100654	0.9633	0.973106	1.83037	1.48446	3.28572
PRKCQ	Protein kinase C theta type	Q04759	VFLAEFK	YES	YES	394	YES	1	0.382205	0.0899497	0.108221	0.0980994	0.0615251	0.0149351	0.9982	0.0891476	1	-4.44748	6.34285
PRKCQ	Protein kinase C theta type	Q04759	NFSFMNPGMER	YES	YES	693	NO	1	2.48348	2.90588	3.39449	3.54261	3.56855	0.0129386	0.9978	1.00151	3.70244	2.02663	3.65094
BTK	Tyrosine-protein kinase BTK	Q06187	WSPPEVLMYSK	YES	YES	563	NO	1	1.10323	1.71961	2.89489	3.23292	3.24576	0.416739	1	1.00539	3.26237	2.13874	6.47462
PRKAA1	5'-AMP-activated protein kinase catalytic subunit alpha-1	Q13131	IGHYILGDTLGVGTFGK	YES	YES	24	YES	1	0.425053	0.29076	0.271801	0.276396	0.231546	0.00353703	0.9975	0.254993	1.00002	-3.25943	9.02904
PAK2	Serine/threonine-protein kinase PAK 2	Q13177	LAKPLSSLTPLIMAAK	YES	YES	502	YES	1	1.01031	0.535248	0.345541	0.322248	0.316956	0.166557	0.9991	0.328245	1.00518	-1.8557	5.79925
PRPF4B	Serine/threonine-protein kinase PRP4 homolog	Q13523	DLLADLIGCQRLPEDQR	YES	YES	954	YES	1	0.932074	1.1111	0.82792	0.559386	0.485554	2.46039	0.9384	0.520769	1.01438	-0.992724	3.47282
PRPF4B	Serine/threonine-protein kinase PRP4 homolog	Q13523	VQSGMGLILQGYESGSEEEGEIHEK	YES	YES	129	NO	1	1.80381	1.14035	2.86049	3.59179	3.52298	1.67283	0.9451	1.31467	3.5574	1.78486	3.51318
RIPK1	Receptor-interacting serine/threonine-protein kinase 1	Q13546	IADLGLASFK	YES	YES	154	YES	1	0.97912	0.970194	0.925464	0.754488	0.65859	12.268	0.9973	0.604005	0.988083	-0.44144	3.04731
RIPK1	Receptor-interacting serine/threonine-protein kinase 1	Q13546	LNNEEHNELR	YES	YES	168	NO	1	1.01568	1.00826	1.40562	1.63263	1.88124	4.63049	0.9774	0.976151	1.9645	0.845381	3.87394
STK38	Serine/threonine-protein kinase 38	Q15208	LSDFGLCTGLK	YES	YES	228	YES	1	0.978829	0.433317	0.22783	0.201393	0.166693	0.12289	0.9979	0.196373	1.00436	-3.06266	7.16153
RPS6KA1	Ribosomal protein S6 kinase alpha-1	Q15418	NLVFSDGYVVK	YES	YES	411	YES	1	1.01296	0.800803	0.583242	0.412262	0.367419	0.706051	0.9924	0.35378	1.02208	-0.76377	4.6053
PKN1	Serine/threonine-protein kinase N1	Q16512	IADFGLCK	YES	YES	756	YES	1	0.5626	0.345522	0.276066	0.259579	0.235304	0.0121689	0.9994	0.244623	1.0001	-1.19596	6.10983
AAK1	AP2-associated protein kinase 1	Q2M2I8	DLKVENILLHDR	YES	YES	176	YES	1	0.362074	0.225867	0.440233	0.249087	0.166977	0.0370392	0.9224	-0.299673	1.00019	-2.33229	3.52235
MYLK3	Myosin light chain kinase 3	Q32MK0	IIDFGLAR	YES	YES	654	YES	1	0.998132	0.731555	0.487295	0.548681	0.495662	0.191407	0.9923	0.510542	0.999078	-0.917467	3.69655
PKN3	Serine/threonine-protein kinase N3	Q6P5Z2	VLLVQFK	YES	YES	573	YES	1	0.77577	0.549237	0.381121	0.362229	0.344657	0.0572478	0.9988	0.339687	0.998971	-1.24807	4.02479
PIK3C3	Phosphatidylinositol 3-kinase catalytic subunit type 3	Q8NEB9	SLLAAQQTFVDR	NO	YES	540	YES	1	1.00733	0.948221	0.923605	0.743919	0.624035	23.5394	0.9903	0.473493	0.998467	-0.471725	3.03518
PIP4K2C	Phosphatidylinositol 5-phosphate 4-kinase type-2 gamma	Q8TBX8	DVEFLVQLK	NO	YES	269	YES	1	1.06259	0.911617	0.706319	0.282772	0.208954	3.36216	0.9913	0.155769	1.02038	-3.31603	6.79814
NEK9	Serine/threonine-protein kinase Nek9	Q8TD19	GAFGEATLYR	YES	YES	61	YES	1	0.999577	1.04615	0.996497	0.660373	0.466762	14.9271	0.9949	0.446223	1.01495	-0.832148	4.02125
MASTL	Serine/threonine-protein kinase greatwall	Q96GX5	ILGTPDYLAPELLLGR	YES	YES	738	YES	1	0.925272	0.926633	0.739033	0.368769	0.226609	6.02328	0.9956	0.152668	0.968684	-1.62254	5.69279
SRPK1	SRSF protein kinase 1	Q96SB4	STAGNFLVNPLEPK	YES	YES	473	YES	1	0.944092	0.676255	0.241305	0.163598	0.162082	0.305664	0.9997	0.156937	0.991513	-0.446886	5.01095
VRK1	Serine/threonine-protein kinase VRK1	Q99986	DILLQGLK	YES	YES	322	YES	1	1.03111	1.11481	0.649443	0.386633	0.26634	1.91201	0.978	0.326478	1.04864	-0.996958	4.56492
RIOK2	Serine/threonine-protein kinase RIO2	Q9BVS4	NHEIVPGSLIASIASLK	YES	YES	29	YES	1	1.01544	1.05412	0.96001	0.57029	0.4515	8.70168	0.995	0.436362	1.02313	-1.17553	6.25992
SLK	STE20-like serine/threonine-protein kinase	Q9H2G2	SEPPTLAQPSR	YES	YES	250	YES	1	0.355138	0.302751	0.3181	0.34213	0.29619					-1.9614	7.69953
TAOK3	Serine/threonine-protein kinase TAO3	Q9H2K8	VLIDLIQR	YES	YES	285	YES	1	0.469842	0.22819	0.178036	0.18453	0.152321	0.0103323	0.9991	0.167705	1.00002	-2.51726	9.57645
BMP2K	BMP-2-inducible protein kinase	Q9NSY1	DLKVENILLNDGGNYVLCDFGSATNK	YES	YES	180	YES	1	0.646207	0.0857757	0.0536532	0.079207	0.0752565	0.025635	0.9995	0.069426	0.999996	-3.2817	6.12382
IRAK4	Interleukin-1 receptor-associated kinase 4	Q9NWZ3	ISDFGLAR	YES	YES	327	YES	1	1.00427	0.515046	0.437449	0.436025	0.450417	0.136041	0.9997	0.441297	1.00216	-1.0218	4.9432
STK26	Serine/threonine-protein kinase 26	Q9P289	NNPPTLVGDFTK	YES	YES	234	YES	1	1.05028	0.958492	0.567482	0.503382	0.503574	0.627047	0.9962	0.502993	1.02528	-0.729456	5.81294
STK26	Serine/threonine-protein kinase 26	Q9P289	TSYLTELIDRFKR	YES	YES	281	NO	1	1.26449	3.8927	4.32042	3.67945	4.89507	0.0717177	0.9449	1.00022	4.30008	2.20079	3.39408
TBK1	Serine/threonine-protein kinase TBK1	Q9UHD2	LFAIEEETTTR	YES	YES	70	YES	1	0.89747	0.729553	0.729305	0.677846	0.663546	0.0401687	0.9776	0.684634	1.00118	-0.56434	4.28521
TLK1	Serine/threonine-protein kinase tousled-like 1	Q9UKI8	YLLLHLLGR	YES	YES	456	YES	1	1.03771	0.336355	0.180032	0.160626	0.162754	0.155932	0.999	0.167805	1.01886	-2.23161	5.1434
STK38L	Serine/threonine-protein kinase 38-like	Q9Y2H1	DIKPDNLLLDAK	YES	YES	213	YES	1	0.95633	0.954652	0.342928	0.0851254	0.0678251	1.27233	0.999	0.0738322	0.979142	-3.22988	7.49877
MAP4K5	Mitogen-activated protein kinase kinase kinase kinase 5	Q9Y4K4	LLTHTFVAQPGLSR	YES	YES	271	YES	1	0.962661	0.631465	0.442729	0.383072	0.381816	0.142452	0.9974	0.391093	1.00817	-1.10532	3.45321
CDC42BPB	Serine/threonine-protein kinase MRCK beta	Q9Y5S2	GAFGEVAVVK	YES	YES	85	YES	1	0.675168	0.653673	0.606845	0.381177	0.308152	12.4727	0.9635	-0.128533	0.995049	-1.79067	4.99663
STK24	Serine/threonine-protein kinase 24	Q9Y6E0	TSYLTELIDR	YES	YES	293	YES	1	1.00009	0.761847	0.510856	0.433327	0.407471	0.296527	0.9965	0.418149	1.01654	-0.915252	6.51628
MAP3K4	Mitogen-activated protein kinase kinase kinase 4	Q9Y6R4	LGDFGCSVK	YES	YES	1479	YES	1	0.987722	1.04634	0.916779	0.435306	0.379574	5.40231	0.9955	0.377138	1.0115	-1.3443	5.59003
