# Supplementary material for: A Two-Dimensional Peptide-Centric Stability Assay Maps Multidimensional Target Landscapes Unveiling 17β-Estradiol (E2)-GPX4 Binding-Induced Ferroptosis
Source: Research Square preprint supplement (doi:10.21203/rs.3.rs-6893001/v1), 2025-07-04
Supplement: Supplementary file 12 [file 8e9574c24435e6aa88de270f.xlsx]

## Sheet: Sheet1
Supplementary table 10
This file summarizes global proteome changes following treatment with 20uM 17β-Estradiol (E2) for 2 days in BT474 cells. 2 or erastin,
Experimental Setup	Compound	Concentration [mM]	Data acquisition	Replicate	Cell Line
proteome experiemnt, related to Figure 5A-B, S4A-B	E2	20	DIA	biological replicate1	BT474
	E2	20	DIA	biological replicate2
	E2	20	DIA	biological replicate3
	E2	20	DIA	biological replicate4
	DMSO	same volume as the added E2	DIA	biological replicate1
	DMSO	same volume as the added E2	DIA	biological replicate2
	DMSO	same volume as the added E2	DIA	biological replicate3
	DMSO	same volume as the added E2	DIA	biological replicate4
Column descriptions
	Contrast	Comparsion used for testing
	Gene names	Gene names of the parent protein
	Protein names	Common protein names of the parent protein
	Uniprot entry	Uniprot entry of the parent protein
	Log2FC	Log2 intensity fold change of the proxy peptide that was used to represent its parent protein (moderated empirical Bayes t-test)
	-Log10P.Value	-Log10 P.Value of the proxy peptide that was used to represent its parent protein (moderated empirical Bayes t-test)
	Log2 transformed quantity	Log2 transformed protein quantities

## Sheet: eBayes_BT474
Supplementary table S10
Summary of protein-level bayes t-test result to protein abundance changes responding to 20uM 17β-Estradiol (E2) exposure for 2 days in living BT474 cells
Contrast	Uniprot entry	Gene names	Protein names	Log2FC	-Log10P.Value	Log2 transformed quantity _DMSO				Log2 transformed quantity _20uM E2
						DMSO_Bio.Rep.1	DMSO_Bio.Rep.2	DMSO_Bio.Rep.3	DMSO_Bio.Rep.4	E2_Bio.Rep.1	E2_Bio.Rep.2	E2_Bio.Rep.3	E2_Bio.Rep.4
20uM E2 vs. DMSO	P25815	S100P	Protein S100-P	4.59283	11.1872	16.5376	16.5439	16.4784	16.7117	20.9155	21.1799	21.2001	21.3474
20uM E2 vs. DMSO	P11086	PNMT	Phenylethanolamine N-methyltransferase	2.50602	9.69093	16.5608	16.6709	16.7005	16.7376	19.0146	19.2986	19.127	19.2536
20uM E2 vs. DMSO	O15296	ALOX15B	Polyunsaturated fatty acid lipoxygenase ALOX15B	2.4686	9.62817	18.5904	18.4657	18.4179	18.4524	20.7708	21.0011	20.9249	21.104
20uM E2 vs. DMSO	O76054	SEC14L2	SEC14-like protein 2	3.51609	8.80106	14.4496	14.3587	14.522	13.8805	17.7534	17.8346	17.7843	17.9028
20uM E2 vs. DMSO	O75342	ALOX12B	Arachidonate 12-lipoxygenase, 12R-type	2.49897	8.72036	18.6977	18.6415	18.5355	18.5824	20.8314	21.2385	21.0838	21.2993
20uM E2 vs. DMSO	P61769	B2M	Beta-2-microglobulin	2.93043	8.53496	12.137	12.2222	12.4696	12.3097	15.3088	15.2249	15.1423	15.1841
20uM E2 vs. DMSO	P49327	FASN	Fatty acid synthase	1.64025	8.44039	22.2737	22.1348	22.2097	22.183	23.7473	23.9886	23.7254	23.9009
20uM E2 vs. DMSO	P00918	CA2	Carbonic anhydrase 2	2.15281	8.436	15.0863	15.3093	14.9828	15.1029	17.1633	17.3029	17.4011	17.2253
20uM E2 vs. DMSO	P06401	PGR	Progesterone receptor	-2.85902	8.422	18.3356	18.2972	18.2946	18.331	15.84	15.3889	15.378	15.2155
20uM E2 vs. DMSO	O75410	TACC1	Transforming acidic coiled-coil-containing protein 1	3.60151	8.27967	15.6933	15.805	16.4541	15.7344	19.4016	19.55	19.4895	19.6518
20uM E2 vs. DMSO	P33121	ACSL1	Long-chain-fatty-acid--CoA ligase 1	1.42444	8.26418	19.7479	19.7284	19.6536	19.5663	20.9815	21.1957	21.0871	21.1297
20uM E2 vs. DMSO	P52292	KPNA2	Importin subunit alpha-1	-1.1349	8.07311	19.9048	19.9665	19.8746	19.9154	18.7664	18.6807	18.8304	18.8442
20uM E2 vs. DMSO	Q92597	NDRG1	Protein NDRG1	2.01826	7.93828	17.6727	17.4278	17.2589	17.4317	19.315	19.611	19.4063	19.5319
20uM E2 vs. DMSO	Q96KB5	PBK	Lymphokine-activated killer T-cell-originated protein kinase	-1.47168	7.86872	17.4302	17.2498	17.308	17.3756	15.8186	15.8343	15.9986	15.8252
20uM E2 vs. DMSO	Q14181	POLA2	DNA polymerase alpha subunit B	-1.14984	7.59855	17.7034	17.6571	17.552	17.6355	16.4761	16.4265	16.4917	16.5543
20uM E2 vs. DMSO	O14965	AURKA	Aurora kinase A	-2.09847	7.3562	16.9379	16.7764	16.6844	16.7819	14.9021	14.5763	14.8628	14.4455
20uM E2 vs. DMSO	P04818	TYMS	Thymidylate synthase	-1.72759	7.27203	17.7166	17.7338	17.7649	17.5699	16.1032	15.7855	16.1591	15.8271
20uM E2 vs. DMSO	O00762	UBE2C	Ubiquitin-conjugating enzyme E2 C	-2.11109	7.27166	17.5179	17.2654	17.3388	17.3809	15.5352	15.013	15.1144	15.3962
20uM E2 vs. DMSO	P12273	PIP	Prolactin-inducible protein	3.33672	7.15251	11.5963	11.7215	12.2659	12.2734	15.0598	15.3061	15.5802	15.258
20uM E2 vs. DMSO	Q13740	ALCAM	CD166 antigen	1.3608	7.13684	16.8255	16.8953	16.6927	16.793	18.0569	18.052	18.1959	18.3449
20uM E2 vs. DMSO	P15104	GLUL	Glutamine synthetase	1.30994	7.06107	15.7731	15.6525	15.6044	15.6741	16.8872	17.0704	16.8814	17.1049
20uM E2 vs. DMSO	P00374	DHFR	Dihydrofolate reductase	-1.1794	7.05265	18.5272	18.4629	18.3433	18.3321	17.3371	17.1034	17.2794	17.2281
20uM E2 vs. DMSO	P48507	GCLM	Glutamate--cysteine ligase regulatory subunit	1.21126	6.83545	15.8354	15.7531	15.6374	15.7855	16.8299	17.0123	16.9419	17.0724
20uM E2 vs. DMSO	Q15004	PCLAF	PCNA-associated factor	-1.5631	6.78653	16.3415	16.1328	16.2174	16.0775	14.7005	14.4088	14.6652	14.7422
20uM E2 vs. DMSO	Q9BV20	MRI1	Methylthioribose-1-phosphate isomerase	1.45896	6.74231	21.5262	21.4197	21.4601	21.3622	22.678	23.1738	22.829	22.9233
20uM E2 vs. DMSO	Q14566	MCM6	DNA replication licensing factor MCM6	-0.809181	6.64276	19.0036	18.9801	18.89	18.9508	18.2508	18.0925	18.1396	18.1049
20uM E2 vs. DMSO	Q15645	TRIP13	Pachytene checkpoint protein 2 homolog	-0.706017	6.61364	18.3576	18.3634	18.4276	18.4241	17.6582	17.6675	17.706	17.7169
20uM E2 vs. DMSO	P49643	PRIM2	DNA primase large subunit	-1.04537	6.55119	16.8502	16.7004	16.8213	16.8031	15.7895	15.8478	15.6389	15.7174
20uM E2 vs. DMSO	P06493	CDK1	Cyclin-dependent kinase 1	-0.977971	6.49137	19.8213	19.7007	19.5696	19.6118	18.5915	18.6699	18.7565	18.7737
20uM E2 vs. DMSO	P04183	TK1	Thymidine kinase, cytosolic	-1.16522	6.4757	18.254	18.1418	18.103	18.2546	16.9435	16.9018	17.0071	17.2402
20uM E2 vs. DMSO	Q14764	MVP	Major vault protein	0.994917	6.36442	18.1674	18.1318	17.9884	18.0607	18.9334	19.1196	19.0456	19.2294
20uM E2 vs. DMSO	P25205	MCM3	DNA replication licensing factor MCM3	-0.824211	6.35095	20.3892	20.2506	20.204	20.2516	19.4604	19.3497	19.4372	19.5511
20uM E2 vs. DMSO	P35219	CA8	Carbonic anhydrase-related protein	-1.49409	6.32645	15.667	15.6806	15.566	15.5932	14.3478	13.9034	14.2116	14.0677
20uM E2 vs. DMSO	Q9NPA3	MID1IP1	Mid1-interacting protein 1	1.29176	6.31905	15.4362	15.3994	15.0717	15.3573	16.5031	16.6648	16.5893	16.6744
20uM E2 vs. DMSO	O95067	CCNB2	G2/mitotic-specific cyclin-B2	-2.88289	6.31593	15.1061	14.3368	15.0886	14.8723	12.1556	11.8087	12.2496	11.6582
20uM E2 vs. DMSO	Q9NPD8	UBE2T	Ubiquitin-conjugating enzyme E2 T	-1.59651	6.29419	17.4485	17.8944	17.8379	17.8045	16.0946	16.0717	16.0238	16.4092
20uM E2 vs. DMSO	O95969	SCGB1D2	Secretoglobin family 1D member 2	3.49395	6.27352	11.1931	12.3884	11.2957	12.0806	15.229	15.1888	15.3631	15.1526
20uM E2 vs. DMSO	Q8WWK9	CKAP2	Cytoskeleton-associated protein 2	-1.68646	6.26861	14.8337	14.916	14.7152	14.696	13.026	12.9513	13.3602	13.0777
20uM E2 vs. DMSO	Q8TB40	ABHD4	(Lyso)-N-acylphosphatidylethanolamine lipase	1.40524	6.23061	14.488	14.1365	14.4555	14.2115	15.6262	15.7905	15.7075	15.7881
20uM E2 vs. DMSO	P33991	MCM4	DNA replication licensing factor MCM4	-0.765508	6.21006	19.1537	19.1545	19.0307	19.0665	18.2382	18.3578	18.3162	18.431
20uM E2 vs. DMSO	Q86TG7	PEG10	Retrotransposon-derived protein PEG10	-1.02264	6.17387	17.0239	16.8844	16.8208	16.8783	15.7675	15.9462	15.8096	15.9936
20uM E2 vs. DMSO	Q13136	PPFIA1	Liprin-alpha-1	1.12344	6.16795	18.1217	18.0977	17.9427	18.1069	19.0212	19.2442	19.0941	19.4033
20uM E2 vs. DMSO	P33316	DUT	Deoxyuridine 5'-triphosphate nucleotidohydrolase, mitochondrial	-1.03374	6.16752	20.4719	20.2668	20.2834	20.3453	19.2115	19.2414	19.2538	19.5257
20uM E2 vs. DMSO	O95819	MAP4K4	Mitogen-activated protein kinase kinase kinase kinase 4	1.03188	6.16505	18.0305	17.7324	17.8518	17.9413	18.8424	19.0096	18.8123	19.0191
20uM E2 vs. DMSO	P11413	G6PD	Glucose-6-phosphate 1-dehydrogenase	1.05032	6.10537	20.8962	20.7568	20.6735	20.8093	21.673	21.858	21.7665	22.0395
20uM E2 vs. DMSO	P18858	LIG1	DNA ligase 1	-1.23818	6.10131	17.8164	17.6944	17.6083	17.6506	16.4461	16.1922	16.5958	16.5829
20uM E2 vs. DMSO	Q9NZT1	CALML5	Calmodulin-like protein 5	1.01655	6.09018	18.9806	18.7583	18.6769	18.7346	19.6724	19.7795	19.8264	19.9384
20uM E2 vs. DMSO	O00625	PIR	Pirin	0.783418	6.07457	18.1632	17.9586	18.0242	18.017	18.786	18.8608	18.7461	18.9038
20uM E2 vs. DMSO	Q9BZD4	NUF2	Kinetochore protein Nuf2	-1.05309	6.06879	16.2592	16.2441	16.2173	16.1337	15.1479	15.1897	15.0052	15.2991
20uM E2 vs. DMSO	Q9UNS1	TIMELESS	Protein timeless homolog	-1.10127	6.06521	16.0373	15.9342	16.137	15.9842	14.762	14.9969	14.9346	14.994
20uM E2 vs. DMSO	O60701	UGDH	UDP-glucose 6-dehydrogenase	0.977726	6.00871	20.3663	20.2679	20.1571	20.2806	21.0552	21.4094	21.2207	21.2977
20uM E2 vs. DMSO	Q13257	MAD2L1	Mitotic spindle assembly checkpoint protein MAD2A	-1.08048	6.00828	16.9143	16.9963	17.0092	16.878	15.685	15.8607	16.0623	15.868
20uM E2 vs. DMSO	Q8WX93	PALLD	Palladin	-0.970965	5.9934	17.9076	17.8607	17.8305	17.8144	16.7912	16.974	16.7233	17.0407
20uM E2 vs. DMSO	Q9NVF9	ETNK2	Ethanolamine kinase 2	1.64522	5.98716	14.9856	15.2984	14.7504	15.0874	16.4378	16.8606	16.6234	16.7809
20uM E2 vs. DMSO	Q01831	XPC	DNA repair protein complementing XP-C cells	1.79685	5.98349	14.8056	14.9411	15.101	15.1186	16.9102	16.4623	17.134	16.6472
20uM E2 vs. DMSO	Q15714	TSC22D1	TSC22 domain family protein 1	0.894213	5.97041	16.5064	16.3724	16.3723	16.4023	17.1711	17.2648	17.3832	17.4111
20uM E2 vs. DMSO	P49736	MCM2	DNA replication licensing factor MCM2	-0.775295	5.95716	19.2612	19.2335	19.277	19.4248	18.514	18.409	18.5705	18.6017
20uM E2 vs. DMSO	Q13085	ACACA	Acetyl-CoA carboxylase 1	0.973952	5.94865	19.8386	19.5881	19.6502	19.715	20.4833	20.7915	20.6603	20.7527
20uM E2 vs. DMSO	P20337	RAB3B	Ras-related protein Rab-3B	2.37472	5.92485	11.2308	11.4628	11.1764	11.5349	13.4247	13.5512	13.8596	14.0683
20uM E2 vs. DMSO	O95864	FADS2	Acyl-CoA 6-desaturase	1.15602	5.87087	15.6158	15.715	15.4856	15.5308	16.5782	16.8426	16.6312	16.9194
20uM E2 vs. DMSO	Q00796	SORD	Sorbitol dehydrogenase	0.824959	5.85451	19.6303	19.3959	19.378	19.4047	20.1997	20.3385	20.2184	20.3521
20uM E2 vs. DMSO	P43490	NAMPT	Nicotinamide phosphoribosyltransferase	0.72404	5.79072	20.2903	20.1996	20.152	20.2172	20.8284	20.8919	20.9552	21.0798
20uM E2 vs. DMSO	Q16610	ECM1	Extracellular matrix protein 1	2.01832	5.76765	11.282	11.4953	11.3427	11.4641	13.1117	13.5557	13.4165	13.5735
20uM E2 vs. DMSO	P20061	TCN1	Transcobalamin-1	-0.923255	5.76246	18.0281	18.1577	18.1506	18.2185	17.4228	17.1267	17.185	17.1273
20uM E2 vs. DMSO	P48163	ME1	NADP-dependent malic enzyme	1.19556	5.75303	18.139	17.9019	17.8808	17.6643	18.948	19.2617	19.1186	19.0399
20uM E2 vs. DMSO	P33992	MCM5	DNA replication licensing factor MCM5	-0.758812	5.74292	20.0168	19.839	19.8216	19.825	19.1411	18.9833	19.1552	19.1876
20uM E2 vs. DMSO	Q9NYP7	ELOVL5	Very long chain fatty acid elongase 5	2.66106	5.72627	12.7207	13.5355	13.3779	13.2994	15.3151	15.91	16.1376	16.215
20uM E2 vs. DMSO	Q13308	PTK7	Inactive tyrosine-protein kinase 7	-0.810615	5.71072	16.9158	16.7677	16.7147	16.7568	16.0119	15.8948	16.0425	15.9633
20uM E2 vs. DMSO	Q07864	POLE	DNA polymerase epsilon catalytic subunit A	-1.24456	5.689	15.7654	15.6609	15.5767	15.6635	14.4364	14.1518	14.5523	14.5477
20uM E2 vs. DMSO	P14555	PLA2G2A	Phospholipase A2, membrane associated	2.78137	5.68344	11.1073	11.1573	11.6837	10.7844	13.9109	13.5111	14.1508	14.2853
20uM E2 vs. DMSO	P61024	CKS1B	Cyclin-dependent kinases regulatory subunit 1	-1.12045	5.68101	17.9283	17.7333	17.6866	17.6513	16.7516	16.5785	16.4049	16.7826
20uM E2 vs. DMSO	P49642	PRIM1	DNA primase small subunit	-0.989542	5.66801	16.6763	16.741	16.8452	16.8952	15.9723	15.6858	15.8384	15.7031
20uM E2 vs. DMSO	O95983	MBD3	Methyl-CpG-binding domain protein 3	-0.978529	5.65967	16.858	16.7947	16.7825	16.6168	15.7679	15.6155	15.9104	15.8442
20uM E2 vs. DMSO	P24941	CDK2	Cyclin-dependent kinase 2	-0.716644	5.64098	18.5408	18.4683	18.4289	18.4592	17.6567	17.6861	17.8021	17.8857
20uM E2 vs. DMSO	Q9Y5N6	ORC6	Origin recognition complex subunit 6	-2.70397	5.6198	14.2266	13.8487	14.0744	14.3141	11.9937	10.9875	11.088	11.5787
20uM E2 vs. DMSO	P30043	BLVRB	Flavin reductase (NADPH)	0.806133	5.60925	21.388	21.2922	21.2108	21.2388	21.9611	22.1289	22.0074	22.2569
20uM E2 vs. DMSO	Q9Y4L1	HYOU1	Hypoxia up-regulated protein 1	0.540832	5.57438	18.5596	18.5806	18.5436	18.4921	19.0951	19.1027	19.0063	19.1352
20uM E2 vs. DMSO	Q92484	SMPDL3A	Acid sphingomyelinase-like phosphodiesterase 3a	1.94763	5.57115	14.174	13.8623	13.3582	13.615	15.5108	15.6761	15.6535	15.9596
20uM E2 vs. DMSO	P11021	HSPA5	Endoplasmic reticulum chaperone BiP	0.670445	5.55879	21.1316	21.1757	21.116	21.0271	21.7263	21.7827	21.6967	21.9264
20uM E2 vs. DMSO	Q96BD8	SKA1	Spindle and kinetochore-associated protein 1	-1.97403	5.5424	13.327	13.3131	13.3694	13.2482	11.5067	11.5996	11.1729	11.0823
20uM E2 vs. DMSO	Q9BW19	KIFC1	Kinesin-like protein KIFC1	-1.53133	5.53027	14.9863	14.9784	15.2887	15.1491	13.2606	13.5214	13.7923	13.7029
20uM E2 vs. DMSO	Q93062	RBPMS	RNA-binding protein with multiple splicing	-1.20006	5.53024	16.0708	15.7321	15.702	15.7444	14.7006	14.7153	14.4532	14.58
20uM E2 vs. DMSO	Q9BW04	SARG	Specifically androgen-regulated gene protein	1.02123	5.50876	15.898	15.772	16.0889	15.9109	16.7753	16.9537	16.9117	17.1142
20uM E2 vs. DMSO	Q13907	IDI1	Isopentenyl-diphosphate Delta-isomerase 1	0.598816	5.49157	19.3453	19.2486	19.1799	19.2631	19.911	19.8806	19.7532	19.8872
20uM E2 vs. DMSO	P56159	GFRA1	GDNF family receptor alpha-1	-2.53262	5.48405	14.6779	14.3505	14.0902	14.2003	11.9893	11.4699	12.3223	11.407
20uM E2 vs. DMSO	P35249	RFC4	Replication factor C subunit 4	-0.634796	5.46307	18.2411	18.1316	18.1225	18.2153	17.5403	17.5209	17.4632	17.6469
20uM E2 vs. DMSO	Q9H9A7	RMI1	RecQ-mediated genome instability protein 1	-1.21229	5.45712	13.9948	13.9503	13.9486	13.9299	12.769	12.7729	12.7605	12.6719
20uM E2 vs. DMSO	Q9Y6A5	TACC3	Transforming acidic coiled-coil-containing protein 3	-0.731781	5.41384	17.067	17.0262	16.9336	16.9577	16.1683	16.2511	16.2478	16.3902
20uM E2 vs. DMSO	Q96GD4	AURKB	Aurora kinase B	-2.01523	5.3763	14.8508	14.7025	14.6268	14.8182	12.8917	12.6026	12.2543	13.1888
20uM E2 vs. DMSO	P50579	METAP2	Methionine aminopeptidase 2	-0.803078	5.37288	15.7828	15.6432	15.7627	15.8182	15.0101	14.9209	14.9033	14.9603
20uM E2 vs. DMSO	Q9HBM1	SPC25	Kinetochore protein Spc25	-1.21158	5.37083	14.7787	14.7266	14.695	14.7023	13.7042	13.5202	13.2769	13.5549
20uM E2 vs. DMSO	Q96E14	RMI2	RecQ-mediated genome instability protein 2	-1.21796	5.34098	16.4682	16.3173	16.3419	16.4031	15.0302	14.9024	15.4277	15.2984
20uM E2 vs. DMSO	P40938	RFC3	Replication factor C subunit 3	-0.707285	5.32121	17.0031	17.1247	17.0228	17.1228	16.2309	16.4172	16.3698	16.4264
20uM E2 vs. DMSO	P13051	UNG	Uracil-DNA glycosylase	-0.803433	5.311	16.7951	16.6249	16.6495	16.696	16.041	15.7922	15.8144	15.904
20uM E2 vs. DMSO	P50225	SULT1A1	Sulfotransferase 1A1	1.08146	5.31014	16.1556	16.0796	16.184	16.1431	16.8878	17.3203	17.3109	17.3691
20uM E2 vs. DMSO	Q9NTJ3	SMC4	Structural maintenance of chromosomes protein 4	-0.751959	5.30633	17.9544	17.8063	17.7758	17.767	17.0047	17.103	16.9711	17.217
20uM E2 vs. DMSO	Q9BY11	PACSIN1	Protein kinase C and casein kinase substrate in neurons protein 1	1.82043	5.30575	12.3591	12.4156	11.812	12.039	13.9512	13.8509	13.8883	14.2171
20uM E2 vs. DMSO	Q9Y3R5	DOP1B	Protein dopey-2	0.915429	5.29107	16.5378	16.7774	16.6674	16.6363	17.4682	17.7706	17.4185	17.6234
20uM E2 vs. DMSO	Q9BPX3	NCAPG	Condensin complex subunit 3	-0.629605	5.28858	16.4717	16.3964	16.4011	16.398	15.7969	15.7997	15.7391	15.8131
20uM E2 vs. DMSO	Q9Y620	RAD54B	DNA repair and recombination protein RAD54B	-1.81217	5.2652	13.2502	13.3619	13.2825	13.108	11.5808	11.6431	11.4005	11.1295
20uM E2 vs. DMSO	P42695	NCAPD3	Condensin-2 complex subunit D3	-0.851803	5.24579	15.5068	15.5107	15.3776	15.4685	14.5299	14.5864	14.6031	14.7371
20uM E2 vs. DMSO	Q01581	HMGCS1	Hydroxymethylglutaryl-CoA synthase, cytoplasmic	0.91916	5.24081	20.3381	20.2772	20.3506	20.2449	20.976	21.3716	21.1371	21.4028
20uM E2 vs. DMSO	P53602	MVD	Diphosphomevalonate decarboxylase	0.784602	5.23716	19.7724	19.6926	19.5467	19.5861	20.2695	20.4804	20.395	20.5913
20uM E2 vs. DMSO	P28340	POLD1	DNA polymerase delta catalytic subunit	-0.807965	5.23152	17.4925	17.2865	17.3006	17.3175	16.5199	16.4457	16.4784	16.7214
20uM E2 vs. DMSO	Q9NXN4	GDAP2	Ganglioside-induced differentiation-associated protein 2	0.686468	5.21554	16.3966	16.3592	16.365	16.3144	17.1335	17.1356	16.9291	16.9831
20uM E2 vs. DMSO	P52701	MSH6	DNA mismatch repair protein Msh6	1.02159	5.2102	18.6143	18.6401	18.4471	18.7105	19.6733	19.8573	19.6142	19.3537
20uM E2 vs. DMSO	P43155	CRAT	Carnitine O-acetyltransferase	0.798513	5.2036	20.349	20.2042	20.2393	20.0915	20.9099	21.0001	20.943	21.2249
20uM E2 vs. DMSO	P07237	P4HB	Protein disulfide-isomerase	0.750171	5.19499	21.4768	21.2495	21.3633	21.2515	21.9724	22.168	21.9886	22.2128
20uM E2 vs. DMSO	P31350	RRM2	Ribonucleoside-diphosphate reductase subunit M2	-0.537323	5.19246	19.0829	19.1036	19.0308	19.1025	18.4673	18.478	18.6279	18.5972
20uM E2 vs. DMSO	Q14693	LPIN1	Phosphatidate phosphatase LPIN1	1.66674	5.18286	14.4283	14.114	13.6847	13.8889	15.4784	15.8497	15.572	15.8829
20uM E2 vs. DMSO	O95239	KIF4A	Chromosome-associated kinesin KIF4A	-0.718972	5.18129	16.8137	16.6806	16.5584	16.6458	15.9238	15.9402	16.0228	15.9358
20uM E2 vs. DMSO	Q15437	SEC23B	Protein transport protein Sec23B	0.535979	5.17268	18.7978	18.8811	18.7751	18.7572	19.3413	19.4194	19.3526	19.2419
20uM E2 vs. DMSO	O75368	SH3BGRL	Adapter SH3BGRL	0.811594	5.15225	19.492	19.4654	19.3566	19.418	20.0439	20.3038	20.1805	20.4503
20uM E2 vs. DMSO	Q9NR19	ACSS2	Acetyl-coenzyme A synthetase, cytoplasmic	0.811256	5.15099	19.826	19.7646	19.6977	19.723	20.3495	20.5919	20.5398	20.7751
20uM E2 vs. DMSO	P18075	BMP7	Bone morphogenetic protein 7	-1.38888	5.12961	14.7514	14.7798	14.5769	14.3765	13.473	13.2355	13.0112	13.2094
20uM E2 vs. DMSO	Q15274	QPRT	Nicotinate-nucleotide pyrophosphorylase [carboxylating]	0.822894	5.1265	17.8034	17.6138	17.6152	17.7819	18.3709	18.703	18.441	18.591
20uM E2 vs. DMSO	Q96AD5	PNPLA2	Patatin-like phospholipase domain-containing protein 2	1.30873	5.09114	14.2396	14.3107	14.2056	14.088	15.432	15.3798	15.3507	15.9163
20uM E2 vs. DMSO	Q99541	PLIN2	Perilipin-2	1.15527	5.07919	14.1032	14.2229	14.246	14.0966	15.0361	15.4275	15.2904	15.5357
20uM E2 vs. DMSO	P56282	POLE2	DNA polymerase epsilon subunit 2	-1.38821	5.07181	14.9852	15.081	14.9602	14.7709	13.6813	13.6403	13.7433	13.1795
20uM E2 vs. DMSO	Q8TCT1	PHOSPHO1	Phosphoethanolamine/phosphocholine phosphatase	2.69127	5.03228	10.9367	12.1058	10.9883	11.923	14.1983	14.0892	14.0223	14.409
20uM E2 vs. DMSO	Q6PIW4	FIGNL1	Fidgetin-like protein 1	-1.03259	5.02572	15.0364	14.9503	14.6836	14.9527	13.7772	13.8896	13.9649	13.8607
20uM E2 vs. DMSO	P11216	PYGB	Glycogen phosphorylase, brain form	0.476415	5.00878	20.6326	20.6959	20.5722	20.6221	21.0162	21.097	21.151	21.1643
20uM E2 vs. DMSO	O75874	IDH1	Isocitrate dehydrogenase [NADP] cytoplasmic	0.848962	5.00327	21.6665	21.5839	21.466	21.4907	22.1935	22.3818	22.3869	22.6408
20uM E2 vs. DMSO	P17655	CAPN2	Calpain-2 catalytic subunit	0.693491	4.99518	17.7397	17.7588	17.7118	17.7139	18.2162	18.4229	18.5266	18.5325
20uM E2 vs. DMSO	P26447	S100A4	Protein S100-A4	-0.844682	4.99328	17.1919	17.0776	17.0171	17.0805	16.1598	16.4481	16.068	16.3125
20uM E2 vs. DMSO	Q9HB40	SCPEP1	Retinoid-inducible serine carboxypeptidase	0.859754	4.98076	15.369	15.2901	15.2129	15.2305	15.9599	16.1847	16.0792	16.3176
20uM E2 vs. DMSO	Q96HE9	PRR11	Proline-rich protein 11	-1.81835	4.9643	13.6296	13.8017	14.0234	13.7781	11.559	11.927	12.1095	12.3641
20uM E2 vs. DMSO	P49005	POLD2	DNA polymerase delta subunit 2	-0.738911	4.96369	17.0104	16.9876	16.9858	16.9865	16.1149	16.182	16.2624	16.4553
20uM E2 vs. DMSO	P40937	RFC5	Replication factor C subunit 5	-0.733991	4.94666	18.0291	17.9788	17.8806	17.8632	17.1774	17.0345	17.3752	17.2285
20uM E2 vs. DMSO	P17342	NPR3	Atrial natriuretic peptide receptor 3	-2.06171	4.93092	13.2102	13.0865	13.3673	13.3953	11.5378	11.1038	11.4704	10.7005
20uM E2 vs. DMSO	P38571	LIPA	Lysosomal acid lipase/cholesteryl ester hydrolase	0.736322	4.91582	15.3375	15.4249	15.4611	15.428	16.0735	16.1936	16.0383	16.2914
20uM E2 vs. DMSO	P55011	SLC12A2	Solute carrier family 12 member 2	-0.657424	4.91008	16.4167	16.3665	16.3496	16.3327	15.6162	15.7135	15.6671	15.8389
20uM E2 vs. DMSO	Q9H999	PANK3	Pantothenate kinase 3	0.66669	4.90888	15.979	15.9376	15.8773	16.1201	16.6462	16.685	16.5699	16.6797
20uM E2 vs. DMSO	P17900	GM2A	Ganglioside GM2 activator	0.58118	4.90841	16.3547	16.4318	16.3767	16.3806	16.8852	17.0024	16.9158	17.0653
20uM E2 vs. DMSO	Q96CX6	LRRC58	Leucine-rich repeat-containing protein 58	0.948588	4.90462	15.2861	15.259	14.9657	15.1024	15.9288	16.052	16.2422	16.1845
20uM E2 vs. DMSO	P14324	FDPS	Farnesyl pyrophosphate synthase	0.513367	4.86507	20.0067	19.9921	19.871	19.8882	20.3778	20.5204	20.3913	20.522
20uM E2 vs. DMSO	Q9H0H5	RACGAP1	Rac GTPase-activating protein 1	-1.88216	4.84728	14.6403	14.4162	14.1654	14.2947	12.9921	12.0259	12.5742	12.3957
20uM E2 vs. DMSO	P68366	TUBA4A	Tubulin alpha-4A chain	0.977167	4.8416	15.4429	15.9867	15.7479	15.6116	16.6767	16.6388	16.6684	16.7137
20uM E2 vs. DMSO	Q9UHF7	TRPS1	Zinc finger transcription factor Trps1	-0.636591	4.83969	16.3879	16.4071	16.469	16.2496	15.7333	15.7153	15.7245	15.7941
20uM E2 vs. DMSO	O00204	SULT2B1	Sulfotransferase 2B1	0.762855	4.83505	18.4507	18.289	18.1387	18.3302	18.8803	19.1305	19.0564	19.193
20uM E2 vs. DMSO	Q14141	SEPTIN6	Septin-6	0.865606	4.83314	15.36	15.4635	15.3156	15.409	16.1111	16.3631	16.0956	16.4409
20uM E2 vs. DMSO	Q9NRZ9	HELLS	Lymphoid-specific helicase	-1.60878	4.82406	14.3358	14.6017	14.2935	14.2526	13.189	12.4475	12.8538	12.5583
20uM E2 vs. DMSO	P25311	AZGP1	Zinc-alpha-2-glycoprotein	3.68889	4.79421	13.4134	11.5285	11.1559	11.6807	15.4421	15.6145	15.8208	15.6566
20uM E2 vs. DMSO	Q93099	HGD	Homogentisate 1,2-dioxygenase	0.578054	4.79351	16.3911	16.3089	16.2818	16.2727	16.8541	16.9054	16.8145	16.9928
20uM E2 vs. DMSO	P42167	TMPO	Lamina-associated polypeptide 2, isoforms beta/gamma	-0.720033	4.77683	16.7604	16.6482	16.7615	16.8202	15.9373	15.9449	16.0077	16.2202
20uM E2 vs. DMSO	P12004	PCNA	Proliferating cell nuclear antigen	-0.406217	4.7479	21.9755	21.9196	21.9331	21.8852	21.4602	21.5108	21.5213	21.5964
20uM E2 vs. DMSO	Q14749	GNMT	Glycine N-methyltransferase	1.16474	4.71144	12.6441	12.4902	12.8096	12.5773	13.8337	13.6307	13.8348	13.881
20uM E2 vs. DMSO	P35250	RFC2	Replication factor C subunit 2	-0.569745	4.70448	18.333	18.2893	18.2858	18.2684	17.5601	17.8034	17.8248	17.7093
20uM E2 vs. DMSO	Q7Z4W1	DCXR	L-xylulose reductase	0.57615	4.69159	22.6183	22.6277	22.5476	22.5819	23.0407	23.1035	23.1916	23.3442
20uM E2 vs. DMSO	P09972	ALDOC	Fructose-bisphosphate aldolase C	0.671538	4.6858	21.4616	21.3749	21.1136	21.2424	21.8919	21.9385	21.9694	22.0787
20uM E2 vs. DMSO	P07339	CTSD	Cathepsin D	0.628527	4.68281	21.4625	21.2585	21.2947	21.2002	21.8565	22.0119	21.8204	22.0411
20uM E2 vs. DMSO	P14635	CCNB1	G2/mitotic-specific cyclin-B1	-2.54879	4.68094	14.8893	14.8104	14.9549	14.9361	12.2896	13.2433	12.3231	11.5395
20uM E2 vs. DMSO	Q86V21	AACS	Acetoacetyl-CoA synthetase	0.816128	4.66582	16.8966	17.1586	16.8205	16.9028	17.5705	17.7306	17.8296	17.9124
20uM E2 vs. DMSO	Q99661	KIF2C	Kinesin-like protein KIF2C	-1.65853	4.65753	15.6532	15.4746	15.4149	15.4651	14.28	14.1539	13.4489	13.4909
20uM E2 vs. DMSO	Q9HC84	MUC5B	Mucin-5B	-2.27974	4.65565	14.419	13.8163	14.0895	13.8342	11.3257	12.1073	12.3077	11.2993
20uM E2 vs. DMSO	Q08AF3	SLFN5	Schlafen family member 5	-0.419509	4.64859	17.5382	17.4868	17.4848	17.5158	17.087	17.0769	17.0774	17.1063
20uM E2 vs. DMSO	Q9H900	ZWILCH	Protein zwilch homolog	-0.647944	4.63621	15.8062	15.7775	15.7021	15.8317	15.0305	15.1178	15.2118	15.1655
20uM E2 vs. DMSO	Q99747	NAPG	Gamma-soluble NSF attachment protein	0.689678	4.63288	17.4823	17.6387	17.2992	17.4259	18.2439	18.1048	18.0375	18.2185
20uM E2 vs. DMSO	P78549	NTHL1	Endonuclease III-like protein 1	-3.1656	4.63019	14.6351	14.5579	13.5159	14.535	11.6917	10.7016	11.7943	10.3938
20uM E2 vs. DMSO	P26885	FKBP2	Peptidyl-prolyl cis-trans isomerase FKBP2	0.589849	4.62661	19.3929	19.2073	19.1638	19.1897	19.7149	19.8689	19.7821	19.9471
20uM E2 vs. DMSO	Q8TAT6	NPLOC4	Nuclear protein localization protein 4 homolog	0.610979	4.62167	18.6536	18.6257	18.5074	18.511	19.0505	19.268	19.1012	19.322
20uM E2 vs. DMSO	P46779	RPL28	Large ribosomal subunit protein eL28	0.631353	4.61166	19.8437	19.8575	19.9033	20.0775	20.428	20.7085	20.4898	20.581
20uM E2 vs. DMSO	Q96PX9	PLEKHG4B	Pleckstrin homology domain-containing family G member 4B	-0.763392	4.60668	15.759	15.7683	15.6493	15.5083	14.9032	14.9026	14.8059	15.0196
20uM E2 vs. DMSO	P0CG13	CHTF8	Chromosome transmission fidelity protein 8 homolog	-1.56991	4.59637	13.5855	13.5136	13.4714	13.3635	11.5368	12.3144	11.858	11.9452
20uM E2 vs. DMSO	Q8IV08	PLD3	5'-3' exonuclease PLD3	0.620752	4.59432	17.96	17.9982	17.8417	17.8347	18.4245	18.4934	18.4848	18.715
20uM E2 vs. DMSO	Q12873	CHD3	Chromodomain-helicase-DNA-binding protein 3	-0.406719	4.58515	18.8069	18.8662	18.8884	18.8337	18.4043	18.484	18.4925	18.3874
20uM E2 vs. DMSO	P01034	CST3	Cystatin-C	0.639912	4.57451	16.5864	16.3441	16.4867	16.4832	17.0438	17.0282	17.1362	17.2519
20uM E2 vs. DMSO	O00767	SCD	Stearoyl-CoA desaturase	1.93744	4.5661	13.0224	14.0523	14.0147	13.7401	15.4511	15.7726	15.381	15.9746
20uM E2 vs. DMSO	P52895	AKR1C2	Aldo-keto reductase family 1 member C2	2.68633	4.55921	12.2051	10.8031	12.2067	11.0888	14.0375	14.3421	14.2816	14.3879
20uM E2 vs. DMSO	P36969	GPX4	Phospholipid hydroperoxide glutathione peroxidase GPX4	-0.727366	4.5532	18.9596	18.8706	18.7911	18.8495	17.9026	18.113	18.2153	18.3303
20uM E2 vs. DMSO	Q9HBE1	PATZ1	POZ-, AT hook-, and zinc finger-containing protein 1	-0.621291	4.5493	16.1933	16.0524	16.0776	16.1066	15.4349	15.4378	15.4537	15.6184
20uM E2 vs. DMSO	Q9NRF9	POLE3	DNA polymerase epsilon subunit 3	-0.595451	4.54589	16.9445	16.8528	16.9353	17.0087	16.4896	16.2694	16.3367	16.2638
20uM E2 vs. DMSO	O15217	GSTA4	Glutathione S-transferase A4	1.94192	4.54434	12.9837	13.7729	12.6243	12.947	15.0407	15.2919	15.0609	14.702
20uM E2 vs. DMSO	Q7KZF4	SND1	Staphylococcal nuclease domain-containing protein 1	0.576299	4.5163	20.6118	20.4682	20.3818	20.3945	20.9005	21.0643	21.0395	21.1572
20uM E2 vs. DMSO	Q6ZMT1	STAC2	SH3 and cysteine-rich domain-containing protein 2	1.37081	4.4982	14.3623	14.7775	14.9363	15.121	15.9139	16.2381	16.0987	16.4298
20uM E2 vs. DMSO	Q9UPQ0	LIMCH1	LIM and calponin homology domains-containing protein 1	1.7043	4.49795	14.4464	13.4136	14.3019	14.0676	15.8475	15.5583	15.6692	15.9718
20uM E2 vs. DMSO	P23284	PPIB	Peptidyl-prolyl cis-trans isomerase B	0.566258	4.45353	20.9488	20.9026	20.7046	20.7648	21.3051	21.3944	21.3552	21.5311
20uM E2 vs. DMSO	Q9H410	DSN1	Kinetochore-associated protein DSN1 homolog	-0.791087	4.4529	15.0525	15.1884	15.1508	14.946	14.1783	14.2974	14.4259	14.2717
20uM E2 vs. DMSO	O60784	TOM1	Target of Myb1 membrane trafficking protein	0.490347	4.45077	16.5994	16.6961	16.5763	16.7271	17.0772	17.1539	17.1506	17.1785
20uM E2 vs. DMSO	Q08209	PPP3CA	Protein phosphatase 3 catalytic subunit alpha	0.564743	4.43828	19.3409	19.237	19.1384	19.1715	19.6221	19.8546	19.7828	19.8873
20uM E2 vs. DMSO	P50570	DNM2	Dynamin-2	0.518556	4.39302	20.2487	20.1036	20.0205	20.0802	20.5057	20.6945	20.6145	20.7125
20uM E2 vs. DMSO	P06737	PYGL	Glycogen phosphorylase, liver form	0.589951	4.38189	17.0825	17.216	17.1715	17.2448	17.6668	17.6617	17.931	17.8151
20uM E2 vs. DMSO	P04075	ALDOA	Fructose-bisphosphate aldolase A	0.577024	4.38159	23.8422	23.7877	23.6792	23.7095	24.2042	24.3255	24.2795	24.5175
20uM E2 vs. DMSO	Q9BV57	ADI1	Acireductone dioxygenase	0.536066	4.37928	17.3594	17.2962	17.2423	17.1718	17.6726	17.8273	17.8068	17.9073
20uM E2 vs. DMSO	Q86XI2	NCAPG2	Condensin-2 complex subunit G2	-1.15986	4.37885	15.6852	15.6299	15.7846	15.7062	14.2953	14.7721	14.24	14.8591
20uM E2 vs. DMSO	P15941	MUC1	Mucin-1	1.62033	4.3709	13.6157	14.4411	13.3928	13.8832	15.4002	15.3711	15.348	15.6949
20uM E2 vs. DMSO	Q96SI1	KCTD15	BTB/POZ domain-containing protein KCTD15	-0.799241	4.35988	15.9933	15.8598	15.8359	15.8165	15.1992	14.8848	14.9662	15.2584
20uM E2 vs. DMSO	P21266	GSTM3	Glutathione S-transferase Mu 3	0.568048	4.35768	20.0783	20.2297	20.2094	20.1577	20.5481	20.792	20.7256	20.8816
20uM E2 vs. DMSO	Q86UD0	SAPCD2	Suppressor APC domain-containing protein 2	-0.736826	4.3523	15.1752	15.3715	15.1112	15.2678	14.5439	14.4649	14.3866	14.5831
20uM E2 vs. DMSO	O75419	CDC45	Cell division control protein 45 homolog	-1.35112	4.34143	15.1873	15.2769	14.7518	15.081	13.7763	13.4811	14.1359	13.4992
20uM E2 vs. DMSO	O94855	SEC24D	Protein transport protein Sec24D	0.681376	4.30385	17.4908	17.3941	17.3732	17.3728	17.872	18.0057	18.2073	18.2713
20uM E2 vs. DMSO	P14625	HSP90B1	Endoplasmin	0.468475	4.29419	21.0251	20.9116	20.8257	20.8102	21.3073	21.3725	21.3091	21.4575
20uM E2 vs. DMSO	Q8N128	FAM177A1	Protein FAM177A1	1.26265	4.28991	13.0117	13.2896	12.9324	13.1652	13.9806	14.3906	14.3924	14.6859
20uM E2 vs. DMSO	P28676	GCA	Grancalcin	-0.557369	4.27608	19.3067	19.0839	19.0335	19.1684	18.5522	18.596	18.4945	18.7204
20uM E2 vs. DMSO	P53396	ACLY	ATP-citrate synthase	0.603437	4.26629	20.5885	20.3361	20.4273	20.4896	20.9526	21.1728	20.9327	21.1971
20uM E2 vs. DMSO	Q8NBK3	SUMF1	Formylglycine-generating enzyme	1.3471	4.26439	14.0109	13.2319	13.8095	13.9713	14.9955	15.2383	15.2415	14.9367
20uM E2 vs. DMSO	Q03426	MVK	Mevalonate kinase	0.491477	4.24971	18.3711	18.2375	18.1497	18.2392	18.6814	18.8205	18.6532	18.8083
20uM E2 vs. DMSO	P23921	RRM1	Ribonucleoside-diphosphate reductase large subunit	-0.629556	4.24834	18.9499	18.745	18.6764	18.7393	18.0561	18.0267	18.1836	18.326
20uM E2 vs. DMSO	Q8WWI1	LMO7	LIM domain only protein 7	2.76108	4.23343	13.2659	11.4029	12.1893	12.7023	15.1457	15.4072	14.578	15.4739
20uM E2 vs. DMSO	Q99808	SLC29A1	Equilibrative nucleoside transporter 1	-2.15524	4.21821	13.8144	14.0116	13.7149	13.7703	10.9128	12.1772	11.3894	12.2107
20uM E2 vs. DMSO	O75792	RNASEH2A	Ribonuclease H2 subunit A	-0.597411	4.21105	16.8506	16.8217	16.6947	16.7771	16.1454	16.1018	16.1238	16.3835
20uM E2 vs. DMSO	Q92466	DDB2	DNA damage-binding protein 2	-0.699804	4.20942	15.6941	15.7684	15.7848	15.7644	15.1279	14.9125	14.9291	15.2431
20uM E2 vs. DMSO	Q14527	HLTF	Helicase-like transcription factor	-0.734282	4.18915	16.5614	16.388	16.3831	16.399	15.5446	15.5409	15.8814	15.8276
20uM E2 vs. DMSO	Q969H8	MYDGF	Myeloid-derived growth factor	0.54938	4.18356	17.401	17.328	17.1016	17.2053	17.773	17.8534	17.7414	17.8656
20uM E2 vs. DMSO	O15394	NCAM2	Neural cell adhesion molecule 2	-1.76012	4.18353	13.1607	12.8439	13.2303	13.4398	11.7996	11.0588	11.697	11.0789
20uM E2 vs. DMSO	Q9NR33	POLE4	DNA polymerase epsilon subunit 4	-0.752374	4.18102	17.2302	16.9783	17.1022	17.0639	16.1321	16.2227	16.5074	16.503
20uM E2 vs. DMSO	Q02241	KIF23	Kinesin-like protein KIF23	-1.15099	4.17656	15.2542	15.3025	15.1667	15.19	14.3132	14.2848	14.1137	13.5978
20uM E2 vs. DMSO	O75157	TSC22D2	TSC22 domain family protein 2	0.818549	4.15132	16.2856	15.9636	16.3571	16.2266	16.7953	17.2119	16.9958	17.1039
20uM E2 vs. DMSO	P39748	FEN1	Flap endonuclease 1	-0.504824	4.14619	20.2964	20.2657	20.1622	20.2712	19.7065	19.6214	19.7178	19.9305
20uM E2 vs. DMSO	Q16643	DBN1	Drebrin	-0.36879	4.14139	19.8158	19.8128	19.6995	19.7812	19.3825	19.476	19.3396	19.4361
20uM E2 vs. DMSO	Q15223	NECTIN1	Nectin-1	-0.722284	4.12628	15.9022	15.8324	15.9145	15.7505	14.8858	15.1898	15.2856	15.1493
20uM E2 vs. DMSO	O14907	TAX1BP3	Tax1-binding protein 3	-0.476447	4.12073	18.7229	18.5798	18.5636	18.5627	18.1789	18.0157	18.0874	18.2412
20uM E2 vs. DMSO	Q9Y3Z3	SAMHD1	Deoxynucleoside triphosphate triphosphohydrolase SAMHD1	1.21806	4.10864	12.9672	12.4685	12.5091	13.0433	13.8217	14.0863	13.9891	13.9632
20uM E2 vs. DMSO	P33552	CKS2	Cyclin-dependent kinases regulatory subunit 2	-1.06322	4.0937	16.9025	16.5611	16.1952	16.5867	15.2316	15.6192	15.5812	15.5607
20uM E2 vs. DMSO	Q8TF72	SHROOM3	Protein Shroom3	1.19472	4.08786	15.2654	14.681	14.8728	15.2705	15.9625	16.093	16.2743	16.5388
20uM E2 vs. DMSO	Q96PU5	NEDD4L	E3 ubiquitin-protein ligase NEDD4-like	0.422247	4.08316	17.6854	17.5628	17.5326	17.6483	18.0447	18.079	17.9365	18.0578
20uM E2 vs. DMSO	P07602	PSAP	Prosaposin	0.596343	4.08202	21.6523	21.5149	21.4897	21.5144	21.9886	22.0717	22.113	22.3833
20uM E2 vs. DMSO	P42575	CASP2	Caspase-2	-0.734588	4.07824	14.83	14.6688	14.7672	14.5706	13.9988	14.0262	14.0243	13.849
20uM E2 vs. DMSO	Q9BV40	VAMP8	Vesicle-associated membrane protein 8	0.725145	4.07526	16.4109	16.2647	16.2308	16.4119	16.789	17.0485	17.2511	17.1302
20uM E2 vs. DMSO	O95249	GOSR1	Golgi SNAP receptor complex member 1	0.43605	4.05368	17.7127	17.7055	17.5583	17.7222	18.1372	18.0907	18.1925	18.0226
20uM E2 vs. DMSO	P04083	ANXA1	Annexin A1	-0.60188	4.0231	19.399	19.2379	19.0398	19.2034	18.5644	18.5961	18.5218	18.7902
20uM E2 vs. DMSO	Q86UW9	DTX2	Probable E3 ubiquitin-protein ligase DTX2	1.24997	4.02059	15.0103	14.3405	14.1233	14.6529	15.6946	15.9861	15.7275	15.7186
20uM E2 vs. DMSO	Q24JP5	TMEM132A	Transmembrane protein 132A	0.522961	4.01863	15.5956	15.789	15.6655	15.7051	16.2005	16.1361	16.1948	16.3156
20uM E2 vs. DMSO	Q9NZJ9	NUDT4	Diphosphoinositol polyphosphate phosphohydrolase 2	-0.438176	4.0123	18.4011	18.3073	18.2266	18.2049	17.7883	17.944	17.8395	17.8154
20uM E2 vs. DMSO	Q96CM8	ACSF2	Medium-chain acyl-CoA ligase ACSF2, mitochondrial	0.661254	4.00691	19.8205	19.7045	19.6524	19.5893	20.2612	20.2701	20.238	20.6424
20uM E2 vs. DMSO	P27144	AK4	Adenylate kinase 4, mitochondrial	0.628369	4.00082	18.1605	18.003	17.9371	17.8982	18.5245	18.5409	18.5785	18.8684
20uM E2 vs. DMSO	Q9Y2X7	GIT1	ARF GTPase-activating protein GIT1	0.353314	3.98711	18.4082	18.4474	18.3405	18.3586	18.7649	18.8027	18.7236	18.6768
20uM E2 vs. DMSO	Q9P258	RCC2	Protein RCC2	-0.440925	3.9835	20.8793	20.7588	20.6584	20.7497	20.306	20.273	20.252	20.4516
20uM E2 vs. DMSO	Q6SJ93	FAM111B	Serine protease FAM111B	-0.973196	3.98342	14.572	14.9378	14.5392	14.8573	13.8739	13.5906	13.5982	13.9509
20uM E2 vs. DMSO	Q96EY7	PTCD3	Small ribosomal subunit protein mS39	0.484436	3.9822	17.93	17.9465	18.093	17.945	18.4821	18.5164	18.2974	18.5563
20uM E2 vs. DMSO	Q12974	PTP4A2	Protein tyrosine phosphatase type IVA 2	0.579533	3.98144	16.977	16.7313	16.7155	16.7052	17.2217	17.3677	17.3759	17.4819
20uM E2 vs. DMSO	Q9NV56	MRGBP	MRG/MORF4L-binding protein	-0.514898	3.97418	16.0619	15.8786	15.9628	15.9436	15.4649	15.5269	15.3859	15.4096
20uM E2 vs. DMSO	P55327	TPD52	Tumor protein D52	0.576024	3.96687	19.056	19.0404	18.7397	18.8797	19.473	19.5525	19.3723	19.6222
20uM E2 vs. DMSO	Q9NYL2	MAP3K20	Mitogen-activated protein kinase kinase kinase 20	-1.77511	3.9627	14.1967	13.6295	14.3062	14.4557	11.7586	12.3076	12.7629	12.6587
20uM E2 vs. DMSO	Q86U86	PBRM1	Protein polybromo-1	-0.408681	3.95976	17.4046	17.3316	17.2773	17.2408	16.9157	16.946	16.8474	16.9104
20uM E2 vs. DMSO	Q9NVQ4	FAIM	Fas apoptotic inhibitory molecule 1	-0.513086	3.94971	16.1658	16.1702	16.1281	16.2649	15.6059	15.5946	15.6787	15.7975
20uM E2 vs. DMSO	P16298	PPP3CB	Serine/threonine-protein phosphatase 2B catalytic subunit beta isoform	0.52501	3.94792	19.7803	19.5695	19.575	19.608	19.9725	20.2431	20.1546	20.2627
20uM E2 vs. DMSO	A6NNY8	USP27X	Ubiquitin carboxyl-terminal hydrolase 27	-0.557985	3.94578	15.8212	15.7494	15.5715	15.7716	15.2126	15.2025	15.1308	15.1358
20uM E2 vs. DMSO	Q9BW71	HIRIP3	HIRA-interacting protein 3	-0.552848	3.927	16.3883	16.4826	16.3113	16.3926	15.6732	15.9564	15.8331	15.9007
20uM E2 vs. DMSO	Q9C010	PKIB	cAMP-dependent protein kinase inhibitor beta	0.775801	3.92117	14.0754	14.1326	13.872	13.9756	14.8642	14.887	14.8466	14.561
20uM E2 vs. DMSO	Q9UI14	RABAC1	Prenylated Rab acceptor protein 1	1.1135	3.91538	15.3717	15.2145	14.8561	15.136	15.8044	16.4309	16.3074	16.4895
20uM E2 vs. DMSO	P36639	NUDT1	Oxidized purine nucleoside triphosphate hydrolase	-0.555055	3.91231	17.9526	17.8333	17.6591	17.7385	17.2939	17.1413	17.156	17.3719
20uM E2 vs. DMSO	P07942	LAMB1	Laminin subunit beta-1	-1.98896	3.90922	14.395	14.1246	14.0931	14.2726	12.6505	12.1529	11.329	12.797
20uM E2 vs. DMSO	Q14839	CHD4	Chromodomain-helicase-DNA-binding protein 4	-0.349481	3.90117	19.0906	19.0107	19.0088	19.0243	18.6092	18.6425	18.7548	18.73
20uM E2 vs. DMSO	Q6P1R4	DUS1L	tRNA-dihydrouridine(16/17) synthase [NAD(P)(+)]-like	1.04962	3.89421	17.6474	17.4991	17.23	17.4699	18.7624	18.0562	18.7528	18.4735
20uM E2 vs. DMSO	P30307	CDC25C	M-phase inducer phosphatase 3	-2.0409	3.89209	13.1208	12.5489	13.1024	12.5247	10.2789	11.1836	10.3815	11.2892
20uM E2 vs. DMSO	Q9H2K8	TAOK3	Serine/threonine-protein kinase TAO3	-0.550931	3.88798	16.5557	16.3698	16.4338	16.5787	15.9846	16.0484	15.9004	15.8009
20uM E2 vs. DMSO	Q9BRT9	GINS4	DNA replication complex GINS protein SLD5	-1.09102	3.88569	15.7246	15.7899	15.6158	15.7685	14.6986	14.95	14.1216	14.7645
20uM E2 vs. DMSO	Q9Y244	POMP	Proteasome maturation protein	0.471702	3.88423	15.3345	15.2747	15.3396	15.3823	15.7322	15.8352	15.8168	15.8337
20uM E2 vs. DMSO	Q96S97	MYADM	Myeloid-associated differentiation marker	-0.524955	3.87979	17.0439	17.1791	17.1652	17.0357	16.6442	16.5267	16.4341	16.7191
20uM E2 vs. DMSO	P62070	RRAS2	Ras-related protein R-Ras2	-0.630111	3.87194	14.8592	14.6576	14.7919	14.7532	14.1362	14.2154	14.1387	14.0511
20uM E2 vs. DMSO	Q15398	DLGAP5	Disks large-associated protein 5	-1.74817	3.86677	12.7651	12.6786	13.0064	12.8078	11.7381	10.5793	11.018	10.9297
20uM E2 vs. DMSO	Q96D46	NMD3	60S ribosomal export protein NMD3	-0.368283	3.86451	17.117	17.0766	17.0347	17.0842	16.7039	16.7026	16.6692	16.7636
20uM E2 vs. DMSO	P62191	PSMC1	26S proteasome regulatory subunit 4	0.386382	3.86347	19.3211	19.3277	19.2695	19.2847	19.5481	19.6804	19.7316	19.7883
20uM E2 vs. DMSO	Q16763	UBE2S	Ubiquitin-conjugating enzyme E2 S	-0.541928	3.85605	17.1455	17.0129	16.9967	17.0052	16.5133	16.6084	16.2972	16.5737
20uM E2 vs. DMSO	Q7RTS1	BHLHA15	Class A basic helix-loop-helix protein 15	0.770618	3.85423	19.4376	19.4651	19.4507	19.3933	19.9245	20.0478	20.5231	20.3338
20uM E2 vs. DMSO	O95573	ACSL3	Fatty acid CoA ligase Acsl3	0.888207	3.84887	15.8047	15.3642	15.4648	15.519	16.2895	16.2587	16.3938	16.7636
20uM E2 vs. DMSO	Q8WWI5	SLC44A1	Choline transporter-like protein 1	-0.925922	3.84863	14.0733	14.1396	13.8687	13.9403	13.1857	12.8434	13.0131	13.2759
20uM E2 vs. DMSO	P43246	MSH2	DNA mismatch repair protein Msh2	-0.461914	3.84587	18.2125	18.1098	18.0228	18.0823	17.5711	17.5451	17.6868	17.7768
20uM E2 vs. DMSO	P49407	ARRB1	Beta-arrestin-1	0.495693	3.84427	18.0403	17.9834	18.061	18.0039	18.5172	18.7277	18.395	18.4315
20uM E2 vs. DMSO	Q8N2Z9	CENPS	Centromere protein S	-1.46274	3.84012	14.2629	14.1159	14.1783	13.7171	12.9214	12.6719	12.0087	12.8212
20uM E2 vs. DMSO	Q7L592	NDUFAF7	Protein arginine methyltransferase NDUFAF7, mitochondrial	0.570659	3.83018	19.1609	19.1041	18.9335	18.9244	19.4007	19.6705	19.5837	19.7508
20uM E2 vs. DMSO	P35232	PHB1	Prohibitin 1	1.17728	3.82798	14.2209	14.3979	14.6487	14.2918	15.2743	15.523	15.385	16.0862
20uM E2 vs. DMSO	Q9HA92	RSAD1	Radical S-adenosyl methionine domain-containing protein 1, mitochondrial	1.28521	3.82171	12.8612	12.7749	12.5946	13.2174	14.2286	13.9432	13.8616	14.5555
20uM E2 vs. DMSO	Q16881	TXNRD1	Thioredoxin reductase 1, cytoplasmic	0.472241	3.81526	19.0139	18.9023	18.8097	18.8527	19.2683	19.4384	19.2616	19.4995
20uM E2 vs. DMSO	Q8IV56	PRR15	Proline-rich protein 15	0.554315	3.80675	15.975	16.0327	15.8805	15.9922	16.5411	16.3699	16.4769	16.7099
20uM E2 vs. DMSO	P54868	HMGCS2	Hydroxymethylglutaryl-CoA synthase, mitochondrial	0.474727	3.80536	19.7918	19.4703	19.7369	19.6513	20.0536	20.1506	20.1438	20.2012
20uM E2 vs. DMSO	P55145	MANF	Mesencephalic astrocyte-derived neurotrophic factor	0.52257	3.80083	17.3502	17.0991	17.1803	17.0944	17.5762	17.7324	17.6714	17.8342
20uM E2 vs. DMSO	Q16656	NRF1	Nuclear respiratory factor 1	-1.77502	3.79983	14.9545	14.8899	15.1653	14.6198	13.7009	12.6123	13.5953	12.621
20uM E2 vs. DMSO	O95857	TSPAN13	Tetraspanin-13	-0.613992	3.79934	16.6855	16.7171	16.6849	16.5255	15.8641	15.9957	16.0307	16.2665
20uM E2 vs. DMSO	O43633	CHMP2A	Charged multivesicular body protein 2a	0.613958	3.79532	16.9828	16.9158	16.8113	16.8737	17.2692	17.6305	17.4559	17.6839
20uM E2 vs. DMSO	Q96GE4	CEP95	Centrosomal protein of 95 kDa	-1.03644	3.78406	12.8967	13.0559	13.0624	12.9969	11.7513	11.9932	11.9709	12.1508
20uM E2 vs. DMSO	Q9UEW8	STK39	STE20/SPS1-related proline-alanine-rich protein kinase	0.461288	3.77958	16.9989	16.938	16.8079	16.8264	17.2433	17.3216	17.4126	17.4388
20uM E2 vs. DMSO	P01130	LDLR	Low-density lipoprotein receptor	1.03593	3.77499	15.4831	14.7765	14.7774	14.9441	15.8585	15.973	16.1176	16.1759
20uM E2 vs. DMSO	P29375	KDM5A	Lysine-specific demethylase 5A	1.38502	3.77436	14.1144	13.6784	13.6091	13.7249	14.8597	15.7233	14.7805	15.3034
20uM E2 vs. DMSO	O43663	PRC1	Protein regulator of cytokinesis 1	-1.53439	3.7726	15.8889	15.7358	15.7049	15.7533	13.7538	14.0125	15.036	14.143
20uM E2 vs. DMSO	Q13472	TOP3A	DNA topoisomerase 3-alpha	-0.633153	3.76965	16.444	16.2794	16.0322	16.2278	15.5406	15.5345	15.6591	15.7165
20uM E2 vs. DMSO	P46976	GYG1	Glycogenin-1	0.381646	3.76744	18.5772	18.4355	18.3715	18.3937	18.819	18.8804	18.7633	18.8417
20uM E2 vs. DMSO	O00231	PSMD11	26S proteasome non-ATPase regulatory subunit 11	0.379877	3.7667	19.6331	19.6058	19.6242	19.541	20.0359	19.8695	19.9248	20.0934
20uM E2 vs. DMSO	O75340	PDCD6	Programmed cell death protein 6	0.431147	3.75732	19.774	19.6261	19.5867	19.5973	19.9609	20.1094	20.0326	20.2057
20uM E2 vs. DMSO	P29401	TKT	Transketolase	0.394493	3.74514	21.8976	21.8414	21.731	21.8251	22.1608	22.1514	22.1984	22.3625
20uM E2 vs. DMSO	Q8TCU6	PREX1	Phosphatidylinositol 3,4,5-trisphosphate-dependent Rac exchanger 1 protein	-0.47315	3.73831	18.8734	18.731	18.6165	18.8078	18.1359	18.3406	18.2897	18.3699
20uM E2 vs. DMSO	O43502	RAD51C	DNA repair protein RAD51 homolog 3	-0.900594	3.7246	13.8658	13.9211	14.0941	14.2725	13.2253	13.1192	13.2724	12.9342
20uM E2 vs. DMSO	Q13057	COASY	Bifunctional coenzyme A synthase	0.413317	3.72402	17.6429	17.6251	17.6247	17.7174	17.9815	18.0588	18.0026	18.2204
20uM E2 vs. DMSO	Q9H6D7	HAUS4	HAUS augmin-like complex subunit 4	-1.27772	3.72196	15.2638	15.066	15.0785	15.0109	14.2274	14.1621	13.3117	13.6071
20uM E2 vs. DMSO	Q13112	CHAF1B	Chromatin assembly factor 1 subunit B	-0.578837	3.71303	15.5011	15.2694	15.4787	15.5253	14.9212	14.8896	14.7475	14.9008
20uM E2 vs. DMSO	Q96AA8	JAKMIP2	Janus kinase and microtubule-interacting protein 2	0.703611	3.7125	19.048	19.0857	18.8043	19.0084	19.4941	19.534	19.7477	19.985
20uM E2 vs. DMSO	Q96JG6	VPS50	Syndetin	1.50745	3.68933	17.889	17.1981	16.5593	17.556	18.6455	18.7253	18.9366	18.9248
20uM E2 vs. DMSO	Q09666	AHNAK	Neuroblast differentiation-associated protein AHNAK	0.433848	3.68414	22.535	22.3001	22.3609	22.3878	22.7702	22.8427	22.7391	22.9672
20uM E2 vs. DMSO	Q92522	H1-10	Histone H1.10	-0.427113	3.6707	19.2202	19.3299	19.0674	19.3693	18.8123	18.8152	18.7992	18.8517
20uM E2 vs. DMSO	Q9BRT3	MIEN1	Migration and invasion enhancer 1	0.533805	3.66665	20.8325	21.1282	20.9439	21.0594	21.3175	21.5661	21.6114	21.6042
20uM E2 vs. DMSO	Q8N3U4	STAG2	Cohesin subunit SA-2	-0.518272	3.65405	17.7544	17.8029	17.6151	17.7765	17.0538	17.3031	17.1386	17.3803
20uM E2 vs. DMSO	Q96C19	EFHD2	EF-hand domain-containing protein D2	0.478422	3.64887	19.0144	18.8007	18.7414	18.7709	19.2179	19.3767	19.2215	19.4249
20uM E2 vs. DMSO	O15143	ARPC1B	Actin-related protein 2/3 complex subunit 1B	0.449684	3.64847	18.768	18.5932	18.5831	18.5897	18.9428	19.0805	19.0765	19.233
20uM E2 vs. DMSO	O95235	KIF20A	Kinesin-like protein KIF20A	-2.82612	3.64356	14.9731	14.7528	14.6108	14.7197	13.1914	10.7445	12.4454	11.3706
20uM E2 vs. DMSO	Q13618	CUL3	Cullin-3	0.566455	3.63669	18.7546	18.4685	18.4842	18.3925	18.9378	19.1993	19.0327	19.1959
20uM E2 vs. DMSO	Q8IY33	MICALL2	MICAL-like protein 2	0.758042	3.63658	14.2404	14.4938	14.6005	14.6158	15.0099	15.3164	15.2681	15.3883
20uM E2 vs. DMSO	P09668	CTSH	Pro-cathepsin H	0.644079	3.63387	16.3171	16.296	16.0522	16.1474	16.7286	16.7849	16.7572	17.1184
20uM E2 vs. DMSO	Q8WYQ3	CHCHD10	Coiled-coil-helix-coiled-coil-helix domain-containing protein 10, mitochondrial	2.29034	3.6247	10.9721	12.1674	11.0747	11.4198	13.2494	13.1307	14.5906	13.8247
20uM E2 vs. DMSO	Q9NVI1	FANCI	Fanconi anemia group I protein	-0.714448	3.62395	18.1944	18.2133	18.0703	18.1587	17.2951	17.2572	17.4059	17.8207
20uM E2 vs. DMSO	Q9UKD1	GMEB2	Glucocorticoid modulatory element-binding protein 2	-0.463843	3.61969	16.7979	16.7639	16.7509	16.6882	16.3532	16.3808	16.1115	16.3
20uM E2 vs. DMSO	Q6V0I7	FAT4	Protocadherin Fat 4	1.19003	3.61545	15.3005	15.5663	15.3489	15.3665	16.9143	16.6286	16.8538	15.9457
20uM E2 vs. DMSO	P15559	NQO1	NAD(P)H dehydrogenase [quinone] 1	0.519439	3.58332	20.7176	20.6918	20.581	20.5745	20.9226	21.3105	21.135	21.2745
20uM E2 vs. DMSO	Q9Y2Q3	GSTK1	Glutathione S-transferase kappa 1	0.3803	3.58214	18.6484	18.5039	18.5101	18.4984	18.9144	18.9564	18.7972	19.014
20uM E2 vs. DMSO	Q14691	GINS1	DNA replication complex GINS protein PSF1	-0.729615	3.57497	16.0149	15.9817	15.8322	15.6327	15.2655	14.8975	15.0966	15.2834
20uM E2 vs. DMSO	P82970	HMGN5	High mobility group nucleosome-binding domain-containing protein 5	0.565332	3.56024	15.7087	15.5115	15.3558	15.6296	16.1688	16.006	16.0975	16.1945
20uM E2 vs. DMSO	Q14410	GK2	Glycerol kinase 2	-1.67453	3.5377	15.6083	14.1373	15.0922	15.0074	13.0533	13.1688	13.2965	13.6285
20uM E2 vs. DMSO	Q9HCN8	SDF2L1	Stromal cell-derived factor 2-like protein 1	0.630499	3.53111	15.6857	15.5695	15.816	15.378	16.0937	16.295	16.24	16.3424
20uM E2 vs. DMSO	A1L020	MEX3A	RNA-binding protein MEX3A	-1.2096	3.52651	13.4805	13.5586	13.6331	13.5824	12.3335	12.4376	11.8453	12.7998
20uM E2 vs. DMSO	Q6P1K2	PMF1	Polyamine-modulated factor 1	-0.459483	3.52555	15.9132	15.7649	15.7783	15.8158	15.2903	15.2972	15.4483	15.3985
20uM E2 vs. DMSO	O14880	MGST3	Glutathione S-transferase 3, mitochondrial	1.64079	3.52287	12.2046	12.8901	12.9438	13.2082	14.4221	13.812	14.6714	14.9043
20uM E2 vs. DMSO	A0AV96	RBM47	RNA-binding protein 47	0.442743	3.52219	17.8067	17.7353	17.6761	17.5706	17.9975	18.1233	18.1848	18.254
20uM E2 vs. DMSO	Q96EA4	SPDL1	Protein Spindly	-1.37478	3.50589	13.4144	13.2585	13.4184	13.3947	12.1929	11.8904	12.4969	11.4067
20uM E2 vs. DMSO	Q9GZX9	TWSG1	Twisted gastrulation protein homolog 1	-1.20786	3.4951	13.7551	13.7109	13.0342	13.7555	12.6113	12.2774	12.3872	12.1485
20uM E2 vs. DMSO	Q99519	NEU1	Sialidase-1	0.513424	3.48819	18.3543	18.2728	18.2001	18.2234	18.6347	18.7008	18.7341	19.0347
20uM E2 vs. DMSO	O14561	NDUFAB1	Acyl carrier protein, mitochondrial	0.436725	3.48429	17.7384	17.7524	17.7967	17.7041	18.143	18.1223	18.0781	18.395
20uM E2 vs. DMSO	Q8IVT2	MISP	Mitotic interactor and substrate of PLK1	-0.552707	3.48313	15.8941	15.6074	15.8795	15.8909	15.2183	15.2305	15.4008	15.2115
20uM E2 vs. DMSO	Q13796	SHROOM2	Protein Shroom2	0.440589	3.4828	15.722	15.6265	15.6647	15.7654	16.1618	16.247	16.0901	16.0421
20uM E2 vs. DMSO	A1X283	SH3PXD2B	SH3 and PX domain-containing protein 2B	0.633088	3.48208	14.9374	14.7309	14.9201	15.089	15.3743	15.5434	15.5744	15.7176
20uM E2 vs. DMSO	O00592	PODXL	Podocalyxin	-0.857402	3.48153	15.1132	15.1202	14.8641	14.9158	13.9218	14.0591	14.0636	14.5391
20uM E2 vs. DMSO	Q6W4X9	MUC6	Mucin-6	-0.449968	3.47015	16.9789	16.7917	16.7868	16.8234	16.3991	16.272	16.3868	16.523
20uM E2 vs. DMSO	Q9NXG2	THUMPD1	THUMP domain-containing protein 1	0.516018	3.4638	19.1825	18.9615	18.9202	18.9308	19.3525	19.5806	19.4325	19.6935
20uM E2 vs. DMSO	Q96R06	SPAG5	Sperm-associated antigen 5	-1.63298	3.46236	15.7824	15.7555	15.4962	15.6641	14.095	14.1089	14.7818	13.1806
20uM E2 vs. DMSO	Q8NCL4	GALNT6	Polypeptide N-acetylgalactosaminyltransferase 6	1.34856	3.45837	12.6522	12.5338	12.4775	13.282	13.668	14.111	14.5108	14.0499
20uM E2 vs. DMSO	Q9Y6X8	ZHX2	Zinc fingers and homeoboxes protein 2	-0.366063	3.45662	17.029	16.9599	17.067	16.9989	16.6044	16.7147	16.5636	16.7079
20uM E2 vs. DMSO	Q96IJ6	GMPPA	Mannose-1-phosphate guanyltransferase alpha	0.432602	3.45385	17.776	17.7159	17.6337	17.7051	17.9746	18.1211	18.1613	18.3043
20uM E2 vs. DMSO	Q9Y6X6	MYO16	Unconventional myosin-XVI	-0.728006	3.44364	15.2997	15.4912	15.0971	15.3975	14.3887	14.5337	14.833	14.618
20uM E2 vs. DMSO	Q13501	SQSTM1	Sequestosome-1	0.449829	3.44092	17.8808	17.7873	18.0232	17.9604	18.1873	18.4502	18.444	18.3695
20uM E2 vs. DMSO	P08243	ASNS	Asparagine synthetase [glutamine-hydrolyzing]	0.305782	3.44028	18.6751	18.6053	18.6307	18.7136	18.9015	18.9489	18.9409	19.0565
20uM E2 vs. DMSO	Q92995	USP13	Ubiquitin carboxyl-terminal hydrolase 13	-0.634219	3.43776	15.8029	15.6228	15.68	15.7309	14.783	15.1137	15.2229	15.1802
20uM E2 vs. DMSO	Q5K4L6	SLC27A3	Long-chain fatty acid transport protein 3	-1.57657	3.43544	13.8424	14.1925	14.244	14.0814	12.1278	13.2945	12.6395	11.9923
20uM E2 vs. DMSO	P53992	SEC24C	Protein transport protein Sec24C	0.346153	3.43468	18.5912	18.5309	18.5693	18.5586	18.7806	18.8976	18.9213	19.0351
20uM E2 vs. DMSO	Q86VI3	IQGAP3	Ras GTPase-activating-like protein IQGAP3	-0.676359	3.43085	15.7537	15.7859	15.5342	15.7037	14.8633	14.8901	15.0014	15.3172
20uM E2 vs. DMSO	P63098	PPP3R1	Calcineurin subunit B type 1	0.513168	3.42907	16.6165	16.6433	16.3114	16.7023	17.1179	17.1029	17.0267	17.0787
20uM E2 vs. DMSO	Q92922	SMARCC1	SWI/SNF complex subunit SMARCC1	-0.344684	3.41614	18.3568	18.2164	18.2134	18.1181	17.905	17.8713	17.895	17.8547
20uM E2 vs. DMSO	Q9NV35	NUDT15	Nucleotide triphosphate diphosphatase NUDT15	-1.22851	3.41562	14.5046	13.8507	13.9123	14.2426	12.8152	12.5569	13.3796	12.8445
20uM E2 vs. DMSO	Q32MZ4	LRRFIP1	Leucine-rich repeat flightless-interacting protein 1	0.455942	3.4149	17.8399	17.8026	17.6955	17.7687	18.0789	18.2612	18.1596	18.4308
20uM E2 vs. DMSO	Q9H993	ARMT1	Damage-control phosphatase ARMT1	-0.362696	3.41398	18.671	18.6724	18.6189	18.8384	18.2914	18.279	18.3539	18.4256
20uM E2 vs. DMSO	Q969G3	SMARCE1	SWI/SNF-related matrix-associated actin-dependent regulator of chromatin subfamily E member 1	-0.328769	3.41191	17.612	17.6239	17.4823	17.4952	17.2381	17.2494	17.2082	17.2026
20uM E2 vs. DMSO	P02144	MB	Myoglobin	0.398423	3.39944	18.5355	18.4815	18.3909	18.5004	18.7167	18.8889	18.8752	19.021
20uM E2 vs. DMSO	P15291	B4GALT1	Beta-1,4-galactosyltransferase 1	0.526985	3.39354	15.8512	15.7567	15.7681	16.027	16.2271	16.3341	16.4296	16.5201
20uM E2 vs. DMSO	Q765P7	MTSS2	Protein MTSS 2	-0.831021	3.39179	12.9981	13.0378	13.0269	13.0974	12.3398	12.2745	12.1095	12.1125
20uM E2 vs. DMSO	P16930	FAH	Fumarylacetoacetase	0.54344	3.38994	17.711	17.4767	17.4393	17.5537	17.8796	18.14	18.0478	18.287
20uM E2 vs. DMSO	Q8WVZ9	KBTBD7	Kelch repeat and BTB domain-containing protein 7	-0.86261	3.38744	12.9106	12.9173	12.8964	12.9605	12.1168	12.1911	11.8995	12.0269
20uM E2 vs. DMSO	Q92823	NRCAM	Neuronal cell adhesion molecule	-0.555239	3.38389	18.1727	17.8788	17.8205	17.6708	17.3309	17.3756	17.2852	17.3302
20uM E2 vs. DMSO	P49588	AARS1	Alanine--tRNA ligase, cytoplasmic	0.416984	3.3833	20.4199	20.6281	20.5461	20.6021	20.7863	21.0642	20.9759	21.0378
20uM E2 vs. DMSO	Q9HBK9	AS3MT	Arsenite methyltransferase	-0.846977	3.38177	14.7122	14.5886	14.9688	14.7069	13.5653	13.8959	13.9423	14.1852
20uM E2 vs. DMSO	P29350	PTPN6	Tyrosine-protein phosphatase non-receptor type 6	0.541847	3.38174	17.2652	17.045	17.0313	17.0929	17.441	17.7142	17.5949	17.8516
20uM E2 vs. DMSO	P20700	LMNB1	Lamin-B1	-0.577907	3.37952	18.9058	18.6916	18.7364	18.6979	17.881	18.3428	18.2899	18.2063
20uM E2 vs. DMSO	O60216	RAD21	Double-strand-break repair protein rad21 homolog	-0.413189	3.37719	17.9364	17.6979	17.7002	17.7804	17.2958	17.3445	17.3369	17.485
20uM E2 vs. DMSO	Q15654	TRIP6	Thyroid receptor-interacting protein 6	-0.60366	3.37603	16.1011	16.1621	16.1627	16.0206	15.4981	15.7222	15.5757	15.2357
20uM E2 vs. DMSO	Q7Z2Y5	NRK	Nik-related protein kinase	-0.872742	3.3741	14.272	14.0737	14.0305	14.2615	13.6725	13.1787	13.1909	13.1048
20uM E2 vs. DMSO	Q9Y2D0	CA5B	Carbonic anhydrase 5B, mitochondrial	-0.444672	3.36546	18.3951	18.4204	18.511	18.2269	17.9684	17.9573	17.7906	18.0584
20uM E2 vs. DMSO	Q8WTS1	ABHD5	1-acylglycerol-3-phosphate O-acyltransferase ABHD5	1.43741	3.36524	14.2937	14.2728	13.1105	14.0808	15.1372	15.2762	15.4646	15.6295
20uM E2 vs. DMSO	Q8N5S9	CAMKK1	Calcium/calmodulin-dependent protein kinase kinase 1	0.503912	3.36251	14.176	14.2745	14.1696	14.2394	14.6587	14.7824	14.7462	14.6879
20uM E2 vs. DMSO	Q9HCM7	FBRSL1	Fibrosin-1-like protein	0.622706	3.35921	15.143	15.2696	15.5006	15.274	15.9396	16.0668	15.6849	15.9867
20uM E2 vs. DMSO	Q9BU68	PRR15L	Proline-rich protein 15-like protein	1.09827	3.35894	11.6757	12.2799	12.0623	12.3475	13.3827	13.0512	13.0478	13.2769
20uM E2 vs. DMSO	Q92769	HDAC2	Histone deacetylase 2	-0.25396	3.35849	19.324	19.3247	19.2578	19.3164	19.008	19.0418	19.101	19.0564
20uM E2 vs. DMSO	Q14202	ZMYM3	Zinc finger MYM-type protein 3	-0.661048	3.35291	15.5456	15.6265	15.4874	15.6242	15.0651	15.1316	14.7805	14.6625
20uM E2 vs. DMSO	Q53T59	HS1BP3	HCLS1-binding protein 3	0.331066	3.34752	17.8783	17.7451	17.7138	17.792	18.0385	18.1646	18.0832	18.167
20uM E2 vs. DMSO	Q13416	ORC2	Origin recognition complex subunit 2	-0.574593	3.34748	15.305	15.0842	15.3502	15.1528	14.787	14.7063	14.5655	14.535
20uM E2 vs. DMSO	O94851	MICAL2	[F-actin]-monooxygenase MICAL2	2.09717	3.34635	12.0317	12.7697	12.1343	10.7673	14.0204	14.1047	14.2886	13.678
20uM E2 vs. DMSO	Q9Y4C2	TCAF1	TRPM8 channel-associated factor 1	-0.367577	3.34295	18.4903	18.4036	18.3815	18.46	17.964	18.0058	18.0771	18.2184
20uM E2 vs. DMSO	Q12841	FSTL1	Follistatin-related protein 1	-1.56497	3.3427	13.4374	13.4825	13.7563	13.3716	12.1534	11.9884	11.1314	12.5149
20uM E2 vs. DMSO	Q15119	PDK2	[Pyruvate dehydrogenase (acetyl-transferring)] kinase isozyme 2, mitochondrial	-0.669555	3.33203	15.1802	15.2089	15.1611	15.1084	14.5606	14.2417	14.4088	14.7692
20uM E2 vs. DMSO	Q13200	PSMD2	26S proteasome non-ATPase regulatory subunit 2	0.300565	3.33071	19.1911	19.2043	19.1338	19.1418	19.3826	19.4825	19.576	19.4321
20uM E2 vs. DMSO	Q9H7C9	AAMDC	Mth938 domain-containing protein	0.44518	3.32428	16.7951	16.6863	16.5708	16.6944	17.0379	17.0902	17.0888	17.3105
20uM E2 vs. DMSO	Q9H8H3	TMT1A	Thiol S-methyltransferase TMT1A	1.00992	3.3181	16.2407	16.1325	15.7201	16.0505	16.6822	17.0153	16.9307	17.5553
20uM E2 vs. DMSO	Q9NYB9	ABI2	Abl interactor 2	-0.786585	3.31339	13.9032	14.0513	14.3652	14.2172	13.331	13.4998	13.4035	13.1561
20uM E2 vs. DMSO	Q9BR61	ACBD6	Acyl-CoA-binding domain-containing protein 6	-0.589954	3.31297	15.3298	15.3164	15.2013	15.2632	14.5934	14.5898	14.6111	14.9566
20uM E2 vs. DMSO	A0A024RBG1	NUDT4B	Diphosphoinositol polyphosphate phosphohydrolase NUDT4B	-0.704355	3.31031	17.9086	17.2933	17.4485	17.6508	16.8092	16.9002	16.7507	17.0237
20uM E2 vs. DMSO	Q9UN36	NDRG2	Protein NDRG2	-0.541698	3.30943	15.7818	16.0442	16.1053	16.0624	15.3207	15.5188	15.5739	15.4135
20uM E2 vs. DMSO	Q9NR12	PDLIM7	PDZ and LIM domain protein 7	-0.397527	3.30589	17.9533	17.7467	17.8421	17.7484	17.3683	17.3249	17.4785	17.5287
20uM E2 vs. DMSO	O60232	ZNRD2	Protein ZNRD2	0.373943	3.30525	18.3762	18.157	18.2198	18.2222	18.5199	18.6219	18.5909	18.7383
20uM E2 vs. DMSO	Q08174	PCDH1	Protocadherin-1	1.19203	3.30495	12.7499	13.1263	12.4284	13.0404	14.0691	13.6118	14.0007	14.4314
20uM E2 vs. DMSO	Q99447	PCYT2	Ethanolamine-phosphate cytidylyltransferase	0.404972	3.2989	19.3843	19.1841	19.1404	19.2005	19.5221	19.698	19.5591	19.7499
20uM E2 vs. DMSO	Q8NFW8	CMAS	N-acylneuraminate cytidylyltransferase	0.487863	3.28712	15.8547	15.6928	15.6753	15.8444	16.2828	16.4269	16.133	16.176
20uM E2 vs. DMSO	Q99460	PSMD1	26S proteasome non-ATPase regulatory subunit 1	0.332505	3.28152	18.7644	18.9408	18.8657	18.8769	19.0764	19.1974	19.2321	19.2718
20uM E2 vs. DMSO	O75582	RPS6KA5	Ribosomal protein S6 kinase alpha-5	0.371053	3.2755	17.216	17.0624	17.1151	17.2129	17.4455	17.6531	17.4841	17.5079
20uM E2 vs. DMSO	Q8N573	OXR1	Oxidation resistance protein 1	-0.597655	3.27102	16.0704	15.7739	15.8832	15.7468	15.264	15.1935	15.1297	15.4966
20uM E2 vs. DMSO	Q8IZ41	RASEF	Ras and EF-hand domain-containing protein	1.08505	3.26693	13.014	12.8087	12.5442	13.0552	13.8087	13.5292	14.1551	14.2692
20uM E2 vs. DMSO	P49721	PSMB2	Proteasome subunit beta type-2	0.351063	3.26601	20.2361	20.1471	20.2625	20.3174	20.4333	20.6653	20.6333	20.6355
20uM E2 vs. DMSO	P56545	CTBP2	C-terminal-binding protein 2	-0.357379	3.24998	18.34	18.1955	18.1974	18.1186	17.8785	17.8477	17.7543	17.9416
20uM E2 vs. DMSO	Q9H173	SIL1	Nucleotide exchange factor SIL1	0.760316	3.22844	12.8497	13.1303	12.7547	13.05	13.7375	13.8608	13.6236	13.6039
20uM E2 vs. DMSO	Q13951	CBFB	Core-binding factor subunit beta	-0.444918	3.22734	18.0649	17.9143	17.8288	18.0114	17.4077	17.4918	17.4352	17.7051
20uM E2 vs. DMSO	Q9H0Z9	RBM38	RNA-binding protein 38	-0.563054	3.22721	15.7759	15.7	15.5259	15.4405	14.9855	15.0998	14.918	15.1867
20uM E2 vs. DMSO	P29966	MARCKS	Myristoylated alanine-rich C-kinase substrate	-0.518225	3.22499	19.099	18.9611	18.6711	18.9259	18.5086	18.4451	18.4034	18.2272
20uM E2 vs. DMSO	Q8WVV4	POF1B	Protein POF1B	-0.395084	3.21983	17.8486	17.7081	17.7343	17.7115	17.1968	17.3176	17.4449	17.4628
20uM E2 vs. DMSO	Q00266	MAT1A	S-adenosylmethionine synthase isoform type-1	-1.03338	3.21887	15.9646	15.6752	15.5725	15.0784	14.7665	14.1945	14.5993	14.5968
20uM E2 vs. DMSO	P53609	PGGT1B	Geranylgeranyl transferase type-1 subunit beta	0.861846	3.2104	16.6791	16.0081	16.1663	16.5911	17.0021	17.3136	17.1354	17.4409
20uM E2 vs. DMSO	P02792	FTL	Ferritin light chain	-2.66033	3.21001	15.3457	14.9552	15.2736	15.2696	14.0057	12.7847	11.1126	12.2997
20uM E2 vs. DMSO	A6NEE1	PLEKHD1	Pleckstrin homology domain-containing family D member 1	1.10351	3.20996	14.4766	14.4089	14.1234	13.4549	15.1432	15.2917	15.2627	15.1804
20uM E2 vs. DMSO	Q7Z4H7	HAUS6	HAUS augmin-like complex subunit 6	-1.14974	3.20905	13.4525	13.6343	13.9415	13.7971	12.8162	12.9658	12.225	12.2194
20uM E2 vs. DMSO	Q9BWW4	SSBP3	Single-stranded DNA-binding protein 3	-0.440702	3.20619	16.5096	16.3182	16.3002	16.2407	15.8575	15.8162	15.9247	16.0074
20uM E2 vs. DMSO	Q15942	ZYX	Zyxin	0.355806	3.20121	18.8832	18.6926	18.7442	18.7804	19.0019	19.1598	19.113	19.2489
20uM E2 vs. DMSO	P52209	PGD	6-phosphogluconate dehydrogenase, decarboxylating	0.334807	3.19602	21.0756	21.1018	21.0022	21.0359	21.262	21.3702	21.3793	21.5433
20uM E2 vs. DMSO	Q8NCN4	RNF169	E3 ubiquitin-protein ligase RNF169	-1.08262	3.19297	14.8862	14.496	14.6281	14.4884	13.5467	13.1365	14.1022	13.3827
20uM E2 vs. DMSO	Q9H0X9	OSBPL5	Oxysterol-binding protein-related protein 5	-2.34214	3.18259	13.2548	14.7459	12.8633	13.5932	10.6745	11.9724	10.7771	11.6646
20uM E2 vs. DMSO	P62333	PSMC6	26S proteasome regulatory subunit 10B	0.229325	3.17805	19.5747	19.5677	19.5135	19.5937	19.7526	19.8006	19.7913	19.8224
20uM E2 vs. DMSO	P20749	BCL3	B-cell lymphoma 3 protein	0.57012	3.17564	14.137	14.4614	14.179	14.3023	14.7774	14.85	14.7657	14.9671
20uM E2 vs. DMSO	P20338	RAB4A	Ras-related protein Rab-4A	0.61491	3.17497	15.1807	15.0402	14.8547	14.7758	15.3714	15.6797	15.6081	15.6519
20uM E2 vs. DMSO	P25787	PSMA2	Proteasome subunit alpha type-2	0.2857	3.17283	19.886	19.9786	19.835	19.8619	20.1045	20.1972	20.1393	20.2633
20uM E2 vs. DMSO	P53621	COPA	Coatomer subunit alpha	0.450448	3.16828	21.4218	21.2629	21.0918	21.3709	21.6614	21.9165	21.6678	21.7034
20uM E2 vs. DMSO	O00442	RTCA	RNA 3'-terminal phosphate cyclase	0.465492	3.16757	16.6988	16.8368	16.698	16.7638	17.0226	17.1473	17.2821	17.4073
20uM E2 vs. DMSO	O95359	TACC2	Transforming acidic coiled-coil-containing protein 2	0.533097	3.16699	14.5296	14.381	14.4079	14.4977	14.8569	15.1258	14.8789	15.0869
20uM E2 vs. DMSO	P20073	ANXA7	Annexin A7	0.268624	3.16353	20.2426	20.133	20.1959	20.2104	20.3956	20.5301	20.414	20.5167
20uM E2 vs. DMSO	Q8IV36	HID1	Protein HID1	0.39762	3.16163	16.8472	16.8664	16.8201	16.863	17.0565	17.2937	17.2532	17.3839
20uM E2 vs. DMSO	Q15154	PCM1	Pericentriolar material 1 protein	-0.552634	3.16033	17.0749	16.7557	16.7798	16.7449	16.1555	16.192	16.2914	16.5059
20uM E2 vs. DMSO	P20674	COX5A	Cytochrome c oxidase subunit 5A, mitochondrial	0.520015	3.14454	18.8135	18.6483	18.6997	18.5864	19.0292	19.2289	19.0857	19.4843
20uM E2 vs. DMSO	Q12982	BNIP2	BCL2/adenovirus E1B 19 kDa protein-interacting protein 2	-0.657446	3.13831	15.3922	15.3141	15.4008	15.371	14.9905	14.7938	14.3919	14.6721
20uM E2 vs. DMSO	O96006	ZBED1	E3 SUMO-protein ligase ZBED1	-0.838822	3.13664	13.8476	13.7837	13.5108	13.2773	12.7853	12.8435	12.7664	12.6689
20uM E2 vs. DMSO	O15075	DCLK1	Serine/threonine-protein kinase DCLK1	-0.507716	3.13587	15.9881	15.9096	15.7133	15.8028	15.21	15.3277	15.3171	15.5282
20uM E2 vs. DMSO	O75144	ICOSLG	ICOS ligand	-0.645407	3.12533	15.2713	15.3143	15.0562	15.1823	14.2685	14.7532	14.6847	14.5361
20uM E2 vs. DMSO	O95347	SMC2	Structural maintenance of chromosomes protein 2	-0.438071	3.12464	18.2733	18.237	18.0784	18.1409	17.7767	17.9119	17.5409	17.7479
20uM E2 vs. DMSO	Q13162	PRDX4	Peroxiredoxin-4	-0.311167	3.12346	19.6101	19.5259	19.4729	19.4977	19.2232	19.1214	19.1766	19.3409
20uM E2 vs. DMSO	O95396	MOCS3	Adenylyltransferase and sulfurtransferase MOCS3	0.401917	3.1187	18.5746	18.43	18.3165	18.4944	18.688	18.9705	18.8737	18.8909
20uM E2 vs. DMSO	Q9UFW8	CGGBP1	CGG triplet repeat-binding protein 1	-0.45404	3.11442	16.5642	16.5872	16.4332	16.6083	16.0588	15.9838	16.0259	16.3082
20uM E2 vs. DMSO	Q9NYU2	UGGT1	UDP-glucose:glycoprotein glucosyltransferase 1	0.325683	3.11376	18.0253	17.9029	17.9033	17.918	18.1667	18.3567	18.1985	18.3303
20uM E2 vs. DMSO	Q13330	MTA1	Metastasis-associated protein MTA1	-0.366569	3.11335	18.5573	18.3997	18.3873	18.3481	17.9159	18.1588	18.0505	18.1009
20uM E2 vs. DMSO	Q15847	ADIRF	Adipogenesis regulatory factor	0.360189	3.10895	19.9238	19.8687	19.8681	19.8524	20.3347	20.0938	20.1451	20.3802
20uM E2 vs. DMSO	P42330	AKR1C3	Aldo-keto reductase family 1 member C3	1.6841	3.10876	11.0377	12.1835	11.0432	12.1999	12.9277	13.6366	13.3206	13.3157
20uM E2 vs. DMSO	O60248	SOX15	Protein SOX-15	-0.644734	3.10825	15.3116	15.2876	15.2662	15.1979	14.9195	14.5689	14.3339	14.6621
20uM E2 vs. DMSO	P07355	ANXA2	Annexin A2	0.369781	3.10732	21.7575	21.6784	21.4818	21.5276	21.9746	21.9282	21.9296	22.0921
20uM E2 vs. DMSO	P51532	SMARCA4	Transcription activator BRG1	-0.274396	3.09675	18.4969	18.4456	18.3827	18.3653	18.1195	18.1453	18.111	18.2171
20uM E2 vs. DMSO	P40939	HADHA	Trifunctional enzyme subunit alpha, mitochondrial	0.404463	3.09306	19.6029	19.6482	19.6089	19.5061	19.9561	19.844	19.9653	20.2185
20uM E2 vs. DMSO	Q07157	TJP1	Tight junction protein ZO-1	-0.270515	3.09258	18.5174	18.4937	18.4866	18.5406	18.2265	18.2484	18.1539	18.3275
20uM E2 vs. DMSO	Q13569	TDG	G/T mismatch-specific thymine DNA glycosylase	0.590826	3.09253	15.4802	15.5291	15.4238	15.018	15.9331	16.0034	15.9434	15.9345
20uM E2 vs. DMSO	Q9UJX3	ANAPC7	Anaphase-promoting complex subunit 7	-0.343985	3.09079	16.4144	16.5359	16.4815	16.5651	16.1473	16.2251	16.1654	16.0832
20uM E2 vs. DMSO	O43542	XRCC3	DNA repair protein XRCC3	-0.804328	3.08947	14.1429	14.3967	14.356	14.5369	13.7746	13.6201	13.6453	13.1753
20uM E2 vs. DMSO	Q9BSY4	CHCHD5	Coiled-coil-helix-coiled-coil-helix domain-containing protein 5	0.365735	3.08879	16.6914	16.4997	16.4739	16.474	16.8874	16.8373	16.9109	16.9664
20uM E2 vs. DMSO	P00390	GSR	Glutathione reductase, mitochondrial	0.409287	3.07963	21.381	21.125	21.1377	21.133	21.5239	21.5544	21.5501	21.7853
20uM E2 vs. DMSO	P09110	ACAA1	3-ketoacyl-CoA thiolase, peroxisomal	0.437537	3.07859	17.2916	17.19	17.1798	17.1357	17.5618	17.547	17.5569	17.8815
20uM E2 vs. DMSO	Q9Y394	DHRS7	Dehydrogenase/reductase SDR family member 7	0.673169	3.0721	16.0525	16.216	16.0435	15.9259	16.4141	16.6152	16.8779	17.0233
20uM E2 vs. DMSO	P13473	LAMP2	Lysosome-associated membrane glycoprotein 2	0.371215	3.06313	19.5262	19.3373	19.3644	19.3015	19.7645	19.6665	19.6705	19.9127
20uM E2 vs. DMSO	Q14676	MDC1	Mediator of DNA damage checkpoint protein 1	-0.488454	3.05827	17.014	17.0089	16.9335	16.7639	16.5472	16.2705	16.3423	16.6065
20uM E2 vs. DMSO	Q9Y223	GNE	Bifunctional UDP-N-acetylglucosamine 2-epimerase/N-acetylmannosamine kinase	0.45183	3.05778	15.1769	15.0233	14.964	15.1566	15.4035	15.6203	15.5423	15.5621
20uM E2 vs. DMSO	P13073	COX4I1	Cytochrome c oxidase subunit 4 isoform 1, mitochondrial	0.573648	3.05315	16.8442	16.467	16.7652	16.5692	17.1874	17.0811	17.1754	17.4962
20uM E2 vs. DMSO	Q70J99	UNC13D	Protein unc-13 homolog D	-0.776554	3.04704	15.3316	15.2979	15.1074	15.0474	14.4006	14.0522	14.7791	14.4463
20uM E2 vs. DMSO	O43251;Q9NWB1	RBFOX2;RBFOX1	RNA binding protein fox-1 homolog 2;RNA binding protein fox-1 homolog 1	-0.468331	3.04625	16.3446	16.2535	16.0128	16.191	15.6459	15.746	15.6651	15.8716
20uM E2 vs. DMSO	Q6PGP7	SKIC3	Superkiller complex protein 3	0.373555	3.0456	16.0301	15.9492	15.9845	15.867	16.2266	16.334	16.3236	16.4409
20uM E2 vs. DMSO	P46459	NSF	Vesicle-fusing ATPase	0.333747	3.04503	19.0854	18.9782	18.8429	18.8678	19.2116	19.2302	19.3285	19.3389
20uM E2 vs. DMSO	O95861	BPNT1	3'(2'),5'-bisphosphate nucleotidase 1	0.296168	3.04348	18.3008	18.2577	18.1776	18.2592	18.4238	18.573	18.5616	18.6215
20uM E2 vs. DMSO	Q6P1M3	LLGL2	LLGL scribble cell polarity complex component 2	0.298087	3.04064	18.0072	17.9613	17.9833	17.969	18.1363	18.3406	18.3063	18.3299
20uM E2 vs. DMSO	Q9H7B4	SMYD3	Histone-lysine N-methyltransferase SMYD3	-0.430654	3.0344	16.0039	15.7832	15.9888	15.9597	15.4649	15.384	15.5628	15.6012
20uM E2 vs. DMSO	P26358	DNMT1	DNA (cytosine-5)-methyltransferase 1	-0.370357	3.02352	19.4009	19.2987	19.1893	19.2016	18.8191	18.9622	18.7908	19.037
20uM E2 vs. DMSO	P06744	GPI	Glucose-6-phosphate isomerase	0.305336	3.01813	22.7301	22.6469	22.5778	22.6396	22.8626	22.9302	22.9319	23.0909
20uM E2 vs. DMSO	Q9NZU5	LMCD1	LIM and cysteine-rich domains protein 1	-0.730061	3.01653	17.4641	17.0957	17.1312	16.6672	16.4182	16.4342	16.2553	16.3302
20uM E2 vs. DMSO	Q8IW50	FAM219A	Protein FAM219A	1.07366	3.01441	12.4081	12.4232	12.2055	12.1325	12.7713	13.5572	13.5153	13.6201
20uM E2 vs. DMSO	Q9UGJ1	TUBGCP4	Gamma-tubulin complex component 4	-0.555455	3.01273	14.8491	14.8362	14.5124	14.6284	14.2381	14.0742	14.1583	14.1336
20uM E2 vs. DMSO	Q4VC05	BCL7A	B-cell CLL/lymphoma 7 protein family member A	-0.956841	3.01054	15.1348	14.8465	14.9152	14.7959	14.1132	14.2895	13.3832	14.0791
20uM E2 vs. DMSO	P32456	GBP2	Guanylate-binding protein 2	0.668643	3.00951	15.0782	15.5552	15.0182	15.411	15.8011	15.983	16.0941	15.8591
20uM E2 vs. DMSO	Q6NYC8	PPP1R18	Phostensin	-1.21022	3.00573	13.9869	13.2831	13.0749	13.805	12.5566	11.9301	12.5074	12.315
20uM E2 vs. DMSO	P61916	NPC2	NPC intracellular cholesterol transporter 2	0.343043	3.00547	19.1739	18.9059	18.9126	19.0153	19.2695	19.3568	19.3414	19.4122
20uM E2 vs. DMSO	Q7L8J4	SH3BP5L	SH3 domain-binding protein 5-like	0.548056	3.00474	14.1504	14.1652	13.8687	13.8921	14.5532	14.5611	14.5381	14.6162
20uM E2 vs. DMSO	P07305	H1-0	Histone H1.0	0.572252	3.00352	17.797	17.6483	17.5133	17.5278	18.2127	18.2698	17.8785	18.4145
20uM E2 vs. DMSO	Q9NR30	DDX21	Nucleolar RNA helicase 2	-0.27502	3.00095	19.6003	19.4979	19.3939	19.5143	19.1855	19.1955	19.2548	19.2707
20uM E2 vs. DMSO	O60547	GMDS	GDP-mannose 4,6 dehydratase	0.355728	2.99988	18.9891	18.9507	18.8783	18.8954	19.11	19.2842	19.2977	19.4446
20uM E2 vs. DMSO	O75363	BCAS1	Breast carcinoma-amplified sequence 1	-0.411294	2.99646	19.5379	19.4458	19.563	19.4406	18.9664	18.9181	19.1998	19.2578
20uM E2 vs. DMSO	P28702	RXRB	Retinoic acid receptor RXR-beta	-0.448448	2.99638	15.8754	15.8106	15.9471	15.7452	15.3743	15.5726	15.3751	15.2624
20uM E2 vs. DMSO	Q8WXB1	METTL21A	Protein N-lysine methyltransferase METTL21A	-0.490252	2.99593	17.6984	17.7947	17.4457	17.5512	17.138	17.2015	16.9249	17.2647
20uM E2 vs. DMSO	Q8WVK7	SKA2	Spindle and kinetochore-associated protein 2	-1.18032	2.99524	14.3217	13.7741	13.4842	13.2267	12.7287	12.2718	12.4758	12.6091
20uM E2 vs. DMSO	Q9UNM6	PSMD13	26S proteasome non-ATPase regulatory subunit 13	0.269037	2.98632	19.2901	19.2658	19.2874	19.1447	19.4411	19.5869	19.5263	19.5099
20uM E2 vs. DMSO	P10619	CTSA	Lysosomal protective protein	0.346531	2.98612	17.7037	17.6096	17.5499	17.5525	17.8879	17.9367	17.8676	18.1096
20uM E2 vs. DMSO	Q9NZN3	EHD3	EH domain-containing protein 3	-0.284738	2.98459	19.109	18.9559	18.9525	18.9398	18.6316	18.6915	18.7233	18.7719
20uM E2 vs. DMSO	Q53FZ2	ACSM3	Acyl-coenzyme A synthetase ACSM3, mitochondrial	0.831466	2.98296	13.5749	14.1626	14.0314	13.8862	14.7196	14.5486	14.6048	15.108
20uM E2 vs. DMSO	Q9UBD5	ORC3	Origin recognition complex subunit 3	-0.429642	2.98111	15.5252	15.6834	15.5798	15.434	15.2242	15.0485	15.1562	15.0748
20uM E2 vs. DMSO	P0DMM9;P0DMN0	SULT1A3;SULT1A4	Sulfotransferase 1A3;Sulfotransferase 1A4	0.889184	2.97991	13.7895	13.3177	13.9012	14.1145	14.5013	14.5849	14.6507	14.9427
20uM E2 vs. DMSO	Q9NX95	SYBU	Syntabulin	1.18716	2.9788	13.1321	12.8742	12.6214	12.875	13.4661	14.0331	14.0885	14.6636
20uM E2 vs. DMSO	Q9UDY8	MALT1	Mucosa-associated lymphoid tissue lymphoma translocation protein 1	0.567924	2.976	14.6111	14.4384	14.1771	14.4779	14.9549	15.1405	14.9542	14.9266
20uM E2 vs. DMSO	P28799	GRN	Progranulin	0.848367	2.97009	17.0749	16.7895	17.077	17.3521	17.5126	17.9082	18.3474	17.9188
20uM E2 vs. DMSO	Q01469	FABP5	Fatty acid-binding protein 5	-0.353333	2.96305	18.2456	18.1619	18.1302	18.071	17.6995	17.7214	17.8121	17.9624
20uM E2 vs. DMSO	P22692	IGFBP4	Insulin-like growth factor-binding protein 4	-0.59234	2.95537	14.6537	14.9014	14.5319	14.7289	14.3058	13.9877	14.1401	14.0129
20uM E2 vs. DMSO	O60825	PFKFB2	6-phosphofructo-2-kinase/fructose-2,6-bisphosphatase 2	0.39143	2.95372	17.2093	17.0826	16.9897	17.0017	17.3464	17.5044	17.3863	17.612
20uM E2 vs. DMSO	Q13547	HDAC1	Histone deacetylase 1	-0.270452	2.94538	19.8871	19.8635	19.782	19.7826	19.4478	19.5645	19.5829	19.6381
20uM E2 vs. DMSO	O94915	FRYL	Protein furry homolog-like	-0.641318	2.94329	14.3549	14.1921	14.6702	14.4083	13.7767	13.5923	13.8501	13.8412
20uM E2 vs. DMSO	Q92785	DPF2	Zinc finger protein ubi-d4	-0.341916	2.94145	17.2261	17.0515	17.0165	17.0148	16.7678	16.6479	16.788	16.7375
20uM E2 vs. DMSO	P62699	YPEL5	Protein yippee-like 5	0.488329	2.94024	15.1734	15.3476	15.2937	15.2136	15.5539	15.7771	15.6935	15.9571
20uM E2 vs. DMSO	Q9UEY8	ADD3	Gamma-adducin	0.385102	2.9346	16.4765	16.3923	16.3251	16.3807	16.6291	16.9296	16.73	16.8264
20uM E2 vs. DMSO	Q13882	PTK6	Protein-tyrosine kinase 6	0.487538	2.92724	15.4388	15.45	15.4634	15.3561	15.6999	15.8348	16.0009	16.1227
20uM E2 vs. DMSO	Q9Y678	COPG1	Coatomer subunit gamma-1	0.332903	2.92527	19.6908	19.4946	19.5649	19.4646	19.7885	19.8196	19.9525	19.9859
20uM E2 vs. DMSO	P37837	TALDO1	Transaldolase	0.383089	2.9204	21.216	21.1402	21.0028	21.1011	21.3488	21.469	21.4729	21.7018
20uM E2 vs. DMSO	P46527	CDKN1B	Cyclin-dependent kinase inhibitor 1B	0.821684	2.91947	14.5027	15.0573	14.8229	14.2112	15.4426	15.4417	15.3965	15.6
20uM E2 vs. DMSO	P25788	PSMA3	Proteasome subunit alpha type-3	0.301423	2.91732	20.4019	20.3342	20.251	20.2501	20.494	20.6305	20.5891	20.7292
20uM E2 vs. DMSO	Q15436	SEC23A	Protein transport protein Sec23A	0.29403	2.91382	19.3936	19.4142	19.2836	19.2764	19.6126	19.5197	19.7032	19.7085
20uM E2 vs. DMSO	O75600	GCAT	2-amino-3-ketobutyrate coenzyme A ligase, mitochondrial	0.390095	2.91244	15.9435	16.1714	16.1197	16.2314	16.4605	16.4532	16.5068	16.6058
20uM E2 vs. DMSO	O15344	MID1	E3 ubiquitin-protein ligase Midline-1	-0.590122	2.91173	15.9906	15.835	15.8033	15.9803	15.399	14.9664	15.5095	15.3738
20uM E2 vs. DMSO	P34931	HSPA1L	Heat shock 70 kDa protein 1-like	0.369293	2.91169	20.4413	20.2882	20.5437	20.4733	20.628	20.8493	20.8301	20.9163
20uM E2 vs. DMSO	P49321	NASP	Nuclear autoantigenic sperm protein	-0.343676	2.90537	20.5816	20.4827	20.4055	20.4723	19.9817	20.1859	20.1086	20.2911
20uM E2 vs. DMSO	P27797	CALR	Calreticulin	0.260555	2.90093	21.3974	21.2571	21.2218	21.1829	21.5121	21.5316	21.5077	21.5501
20uM E2 vs. DMSO	P21291	CSRP1	Cysteine and glycine-rich protein 1	0.376586	2.89849	19.2327	19.0229	18.9908	18.9763	19.2979	19.4229	19.4254	19.5828
20uM E2 vs. DMSO	P61968	LMO4	LIM domain transcription factor LMO4	-0.745815	2.89794	15.388	15.2837	15.2843	15.2023	14.1729	14.4471	14.5949	14.96
20uM E2 vs. DMSO	Q96GX5	MASTL	Serine/threonine-protein kinase greatwall	-0.793055	2.89245	14.1529	13.8049	14.0617	14.0002	12.7938	13.336	13.4093	13.3083
20uM E2 vs. DMSO	P07738	BPGM	Bisphosphoglycerate mutase	0.588636	2.8843	15.2757	15.3616	15.6132	15.2688	15.7297	15.9545	15.9584	16.2311
20uM E2 vs. DMSO	Q9UIC8	LCMT1	Leucine carboxyl methyltransferase 1	0.310149	2.88413	17.5986	17.5775	17.4927	17.6279	17.8208	17.9246	17.7893	18.0027
20uM E2 vs. DMSO	P16083	NQO2	Ribosyldihydronicotinamide dehydrogenase [quinone]	0.405784	2.88017	17.3978	17.2025	17.1526	17.2362	17.4921	17.7577	17.5821	17.7804
20uM E2 vs. DMSO	Q9Y6A4	CFAP20	Cilia- and flagella-associated protein 20	-0.345389	2.87835	17.1053	17.0959	16.9947	17.0687	16.6582	16.633	16.7026	16.8891
20uM E2 vs. DMSO	Q15147	PLCB4	1-phosphatidylinositol 4,5-bisphosphate phosphodiesterase beta-4	-0.356793	2.87651	16.8442	16.6269	16.6897	16.7294	16.3464	16.4405	16.2487	16.4274
20uM E2 vs. DMSO	Q99538	LGMN	Legumain	0.469475	2.86799	15.4763	15.4945	15.3212	15.7332	15.8596	15.9925	16.045	16.006
20uM E2 vs. DMSO	O14773	TPP1	Tripeptidyl-peptidase 1	0.444026	2.86666	18.4861	18.3348	18.1976	18.2488	18.5681	18.7074	18.812	18.9561
20uM E2 vs. DMSO	P07858	CTSB	Cathepsin B	0.320553	2.86391	17.8291	17.7794	17.6652	17.6659	17.9195	18.0772	18.0915	18.1336
20uM E2 vs. DMSO	Q9NZN5	ARHGEF12	Rho guanine nucleotide exchange factor 12	-0.43992	2.86368	15.8628	15.9186	15.8555	15.7937	15.5719	15.5086	15.3717	15.2187
20uM E2 vs. DMSO	Q12955	ANK3	Ankyrin-3	-0.359777	2.85898	18.5804	18.4474	18.3292	18.2867	18.0064	18.1721	18.014	18.012
20uM E2 vs. DMSO	Q01415	GALK2	N-acetylgalactosamine kinase	0.367115	2.8588	18.5563	18.4374	18.3235	18.4105	18.6728	18.7725	18.7694	18.9814
20uM E2 vs. DMSO	Q9Y2T7	YBX2	Y-box-binding protein 2	0.5376	2.85829	13.7962	13.5559	13.5215	13.7212	14.2756	14.1775	14.1844	14.1077
20uM E2 vs. DMSO	Q14204	DYNC1H1	Cytoplasmic dynein 1 heavy chain 1	0.379782	2.85714	19.7986	19.6464	19.5885	19.6287	19.8795	20.1826	19.9627	20.1566
20uM E2 vs. DMSO	Q9UHB9	SRP68	Signal recognition particle subunit SRP68	0.309772	2.85465	18.7691	18.6682	18.6086	18.6368	18.8295	19.0076	19.0116	19.073
20uM E2 vs. DMSO	Q9Y5P6	GMPPB	Mannose-1-phosphate guanyltransferase beta	0.368726	2.85112	18.8476	18.6791	18.6759	18.7642	18.9263	19.1345	19.1058	19.2751
20uM E2 vs. DMSO	P68371	TUBB4B	Tubulin beta-4B chain	-0.252303	2.85099	23.714	23.5973	23.7212	23.7293	23.4551	23.4264	23.3652	23.5059
20uM E2 vs. DMSO	Q9Y343	SNX24	Sorting nexin-24	-0.46025	2.84317	14.7847	14.6542	14.7085	14.6987	14.2047	14.4029	14.2586	14.1389
20uM E2 vs. DMSO	Q8TEX9	IPO4	Importin-4	-0.257967	2.8395	19.5322	19.4407	19.4419	19.5211	19.1299	19.2223	19.2284	19.3235
20uM E2 vs. DMSO	O15360	FANCA	Fanconi anemia group A protein	-1.30034	2.83941	12.9508	13.1441	12.7391	12.9575	12.1704	11.1056	12.071	11.2431
20uM E2 vs. DMSO	Q92890	UFD1	Ubiquitin recognition factor in ER-associated degradation protein 1	0.260101	2.83877	18.9421	18.8317	18.9214	18.7756	19.0801	19.1117	19.121	19.1983
20uM E2 vs. DMSO	Q9BZ23	PANK2	Pantothenate kinase 2, mitochondrial	0.366345	2.83795	15.8192	15.8492	15.8129	15.7218	16.019	16.1747	16.2815	16.1933
20uM E2 vs. DMSO	Q86YS7	C2CD5	C2 domain-containing protein 5	0.556119	2.83743	17.3121	17.3439	16.883	17.3259	17.9594	17.7271	17.8062	17.5966
20uM E2 vs. DMSO	O15381	NVL	Nuclear valosin-containing protein-like	-0.482433	2.8344	14.1637	14.2149	14.1633	14.2527	13.6225	13.8158	13.7456	13.6808
20uM E2 vs. DMSO	Q15904	ATP6AP1	V-type proton ATPase subunit S1	0.978534	2.83122	12.7012	12.56	12.1237	12.2629	13.3751	12.9644	13.5193	13.7033
20uM E2 vs. DMSO	Q96L91	EP400	E1A-binding protein p400	-0.41723	2.82981	15.2321	15.3214	15.4527	15.2337	14.8397	14.8294	14.9906	14.9114
20uM E2 vs. DMSO	P20711	DDC	Aromatic-L-amino-acid decarboxylase	1.73009	2.82804	11.7095	11.0966	11.7543	11.3559	13.6801	13.5151	13.5973	12.0443
20uM E2 vs. DMSO	O94927	HAUS5	HAUS augmin-like complex subunit 5	-0.554226	2.82262	14.0555	14.1623	14.1482	13.9283	13.4319	13.6889	13.4483	13.5082
20uM E2 vs. DMSO	Q8IX18	DHX40	Probable ATP-dependent RNA helicase DHX40	-0.474772	2.82024	15.8442	15.9395	15.9381	15.8696	15.6899	15.3698	15.2439	15.3886
20uM E2 vs. DMSO	O15514	POLR2D	DNA-directed RNA polymerase II subunit RPB4	-0.294467	2.82014	16.896	16.8248	16.785	16.705	16.487	16.538	16.505	16.5029
20uM E2 vs. DMSO	P0C7X2	ZNF688	Zinc finger protein 688	-0.916327	2.81939	12.7999	12.8141	13.3126	12.9735	12.2228	11.9845	11.7548	12.2727
20uM E2 vs. DMSO	O60341	KDM1A	Lysine-specific histone demethylase 1A	-0.243357	2.81342	18.4181	18.373	18.3701	18.2715	18.1037	18.0996	18.0872	18.1687
20uM E2 vs. DMSO	P28066	PSMA5	Proteasome subunit alpha type-5	0.342356	2.81048	20.61	20.5713	20.5461	20.5589	20.7127	21.0046	20.8799	21.0585
20uM E2 vs. DMSO	P50548	ERF	ETS domain-containing transcription factor ERF	-0.670205	2.80377	14.1405	13.8856	14.1393	14.0777	13.5778	13.0807	13.5322	13.3716
20uM E2 vs. DMSO	O75828	CBR3	Carbonyl reductase [NADPH] 3	0.385111	2.80285	19.1216	18.9035	18.9851	18.9109	19.2418	19.3353	19.3034	19.581
20uM E2 vs. DMSO	Q9Y2S2	CRYL1	Lambda-crystallin homolog	0.589823	2.79485	17.0675	17.064	16.5594	16.6239	17.3605	17.4417	17.3282	17.5437
20uM E2 vs. DMSO	P15927	RPA2	Replication protein A 32 kDa subunit	-0.264795	2.78305	18.5068	18.4733	18.4061	18.4209	18.0759	18.2303	18.1785	18.2633
20uM E2 vs. DMSO	P36871	PGM1	Phosphoglucomutase-1	0.244516	2.7778	18.4356	18.3747	18.4002	18.323	18.5754	18.6857	18.5698	18.6807
20uM E2 vs. DMSO	Q7Z7A3	CTU1	Cytoplasmic tRNA 2-thiolation protein 1	0.332978	2.76686	17.6692	17.7402	17.566	17.6253	18.0288	17.8216	17.9763	18.1059
20uM E2 vs. DMSO	Q86Y82	STX12	Syntaxin-12	0.332702	2.76667	16.166	16.0843	16.1084	16.0112	16.3361	16.5259	16.4748	16.3638
20uM E2 vs. DMSO	Q9UH17	APOBEC3B	DNA dC->dU-editing enzyme APOBEC-3B	-0.999788	2.76382	15.2185	15.4874	15.4002	15.5624	14.1385	15.0986	14.4267	14.0058
20uM E2 vs. DMSO	Q9H1Y0	ATG5	Autophagy protein 5	0.279207	2.76327	16.7264	16.6751	16.6465	16.5838	16.8937	16.9101	17.0077	16.9372
20uM E2 vs. DMSO	P09488	GSTM1	Glutathione S-transferase Mu 1	1.03984	2.75925	13.8862	13.5878	12.7681	13.2274	14.2169	14.3945	14.3868	14.6307
20uM E2 vs. DMSO	Q9NPJ3	ACOT13	Acyl-coenzyme A thioesterase 13	0.329854	2.7574	18.6202	18.5814	18.4652	18.5515	18.8517	18.7678	18.846	19.0723
20uM E2 vs. DMSO	Q96DR8	MUCL1	Mucin-like protein 1	0.583661	2.75313	18.4797	18.655	18.498	18.3455	19.0329	18.7786	19.0611	19.4404
20uM E2 vs. DMSO	P31321	PRKAR1B	cAMP-dependent protein kinase type I-beta regulatory subunit	-0.508956	2.75113	17.0121	16.739	16.6927	16.8722	16.2956	16.5267	16.064	16.3939
20uM E2 vs. DMSO	P15586	GNS	N-acetylglucosamine-6-sulfatase	0.412644	2.75079	19.6624	19.6022	19.4464	19.5553	19.8712	19.8689	19.929	20.2478
20uM E2 vs. DMSO	P47736	RAP1GAP	Rap1 GTPase-activating protein 1	0.53175	2.74802	15.4313	15.7366	15.6994	15.5934	15.9307	16.3883	16.032	16.2367
20uM E2 vs. DMSO	Q9UPU7	TBC1D2B	TBC1 domain family member 2B	-0.515354	2.73904	14.2978	14.5932	14.5677	14.4991	14.0457	13.913	14.0899	13.8477
20uM E2 vs. DMSO	Q02487	DSC2	Desmocollin-2	-0.360751	2.73676	16.7043	16.7736	16.5959	16.7674	16.4471	16.2333	16.4546	16.2633
20uM E2 vs. DMSO	P05556	ITGB1	Integrin beta-1	-0.496988	2.73644	15.3952	15.7305	15.5658	15.4995	14.9824	14.9001	15.0541	15.2666
20uM E2 vs. DMSO	P21399	ACO1	Cytoplasmic aconitate hydratase	0.313592	2.73127	16.5935	16.5285	16.4789	16.4567	16.7551	16.8672	16.7508	16.9389
20uM E2 vs. DMSO	Q9UQN3	CHMP2B	Charged multivesicular body protein 2b	0.363147	2.73098	16.3309	16.2442	16.2099	16.298	16.5805	16.4693	16.7452	16.7404
20uM E2 vs. DMSO	Q6P2Q9	PRPF8	Pre-mRNA-processing-splicing factor 8	-0.246587	2.72834	19.2775	19.2789	19.1623	19.147	18.9478	19.0272	18.9027	19.0016
20uM E2 vs. DMSO	O00232	PSMD12	26S proteasome non-ATPase regulatory subunit 12	0.263176	2.72787	19.5012	19.3702	19.3551	19.4318	19.5713	19.7595	19.6566	19.7236
20uM E2 vs. DMSO	Q9HA47	UCK1	Uridine-cytidine kinase 1	-0.520051	2.72771	15.7856	15.7064	15.6293	15.6468	15.3378	15.2031	14.852	15.295
20uM E2 vs. DMSO	Q6ZRQ5	MMS22L	Protein MMS22-like	-1.75035	2.72004	12.0454	13.0821	11.7915	12.8531	9.97462	11.119	10.4888	11.1883
20uM E2 vs. DMSO	P20962	PTMS	Parathymosin	-0.329831	2.71862	18.7886	18.7765	18.7897	18.5566	18.2987	18.469	18.3351	18.4893
20uM E2 vs. DMSO	P55055	NR1H2	Oxysterols receptor LXR-beta	0.495457	2.71688	14.2471	14.0707	14.1018	14.1877	14.786	14.6065	14.45	14.7467
20uM E2 vs. DMSO	Q96CW5	TUBGCP3	Gamma-tubulin complex component 3	-0.332087	2.71604	16.0978	16.0883	15.9766	16.0764	15.7431	15.6429	15.686	15.8388
20uM E2 vs. DMSO	P54753	EPHB3	Ephrin type-B receptor 3	-0.385906	2.71481	16.4381	16.1626	16.2401	16.1995	15.9901	15.8367	15.7725	15.8973
20uM E2 vs. DMSO	P27694	RPA1	Replication protein A 70 kDa DNA-binding subunit	-0.353657	2.71317	19.1176	18.9028	18.8737	18.9611	18.5126	18.5757	18.5578	18.7944
20uM E2 vs. DMSO	P62195	PSMC5	26S proteasome regulatory subunit 8	0.294297	2.71316	20.2833	20.3887	20.5029	20.3009	20.5561	20.7649	20.6731	20.6589
20uM E2 vs. DMSO	Q6P996	PDXDC1	Pyridoxal-dependent decarboxylase domain-containing protein 1	0.338142	2.71314	19.1634	18.9752	19.0352	18.9472	19.2421	19.301	19.4027	19.5278
20uM E2 vs. DMSO	O00148	DDX39A	ATP-dependent RNA helicase DDX39A	-0.219901	2.71061	21.7675	21.5965	21.7008	21.7115	21.4582	21.4455	21.4976	21.4954
20uM E2 vs. DMSO	O14683	TP53I11	Tumor protein p53-inducible protein 11	0.375686	2.70907	16.3246	16.2673	16.0369	16.1734	16.443	16.6305	16.6005	16.6308
20uM E2 vs. DMSO	P57678	GEMIN4	Gem-associated protein 4	-0.320806	2.70872	16.1557	16.1073	16.0909	16.1528	15.6789	15.846	15.8809	15.8177
20uM E2 vs. DMSO	Q9P2S5	WRAP73	WD repeat-containing protein WRAP73	-0.616092	2.70745	13.3962	13.7903	13.6009	13.6015	12.878	13.0643	13.0731	12.9093
20uM E2 vs. DMSO	P40424	PBX1	Pre-B-cell leukemia transcription factor 1	-0.642031	2.70683	15.2681	15.2749	15.1444	15.1603	14.7673	14.8054	14.1663	14.5404
20uM E2 vs. DMSO	Q9GZS1	POLR1E	DNA-directed RNA polymerase I subunit RPA49	-0.341083	2.70572	16.0628	16.0272	15.8416	15.8964	15.6273	15.6377	15.5946	15.604
20uM E2 vs. DMSO	P09496	CLTA	Clathrin light chain A	0.290574	2.70375	19.7757	19.6076	19.6577	19.6015	19.84	19.967	19.9184	20.0793
20uM E2 vs. DMSO	Q15008	PSMD6	26S proteasome non-ATPase regulatory subunit 6	0.211308	2.70244	18.6221	18.6916	18.6911	18.6302	18.8587	18.8664	18.8285	18.9267
20uM E2 vs. DMSO	O60936	NOL3	Nucleolar protein 3	0.3476	2.70224	19.3237	19.0933	19.0667	19.1546	19.362	19.5835	19.4614	19.6217
20uM E2 vs. DMSO	P20839	IMPDH1	Inosine-5'-monophosphate dehydrogenase 1	0.358671	2.70016	19.0663	18.8408	18.9358	18.765	19.1276	19.2213	19.3032	19.3906
20uM E2 vs. DMSO	Q9H1P3	OSBPL2	Oxysterol-binding protein-related protein 2	0.435857	2.69799	15.9289	16.1092	16.1347	16.1012	16.7059	16.3409	16.3824	16.5882
20uM E2 vs. DMSO	O15260	SURF4	Surfeit locus protein 4	0.32259	2.69492	17.9986	18.0171	18.0262	18.1572	18.2044	18.3628	18.4318	18.4905
20uM E2 vs. DMSO	Q9BY43	CHMP4A	Charged multivesicular body protein 4a	0.31756	2.69457	18.6787	18.433	18.5108	18.5495	18.7554	18.8227	18.872	18.9921
20uM E2 vs. DMSO	P51116	FXR2	RNA-binding protein FXR2	0.358643	2.69276	17.3169	17.3781	17.5292	17.5595	17.686	17.7788	17.7947	17.9588
20uM E2 vs. DMSO	P26599	PTBP1	Polypyrimidine tract-binding protein 1	-0.207713	2.69262	20.3041	20.3696	20.3386	20.3822	20.1096	20.083	20.2041	20.167
20uM E2 vs. DMSO	Q5SY16	NOL9	Polynucleotide 5'-hydroxyl-kinase NOL9	-0.434982	2.69195	15.3084	15.6411	15.4144	15.326	14.9247	14.9854	14.9611	15.0787
20uM E2 vs. DMSO	Q14191	WRN	Bifunctional 3'-5' exonuclease/ATP-dependent helicase WRN	-0.763033	2.68892	12.8038	12.9706	12.8409	12.9058	12.1562	12.2842	12.2396	11.789
20uM E2 vs. DMSO	Q9BVG8	KIFC3	Kinesin-like protein KIFC3	-0.944138	2.68622	12.5336	12.694	12.5322	12.8925	11.3197	11.8065	12.077	11.6725
20uM E2 vs. DMSO	Q86WQ0	NR2C2AP	Nuclear receptor 2C2-associated protein	-0.360522	2.68499	17.5834	17.3298	17.3632	17.3505	17.0302	16.925	17.0419	17.1876
20uM E2 vs. DMSO	P51665	PSMD7	26S proteasome non-ATPase regulatory subunit 7	0.230434	2.68454	19.1026	19.0754	19.1378	19.1039	19.3409	19.4376	19.2541	19.3088
20uM E2 vs. DMSO	P48449	LSS	Lanosterol synthase	0.677247	2.68414	17.2512	17.2025	16.8284	16.9739	17.4913	17.8233	17.5201	18.1302
20uM E2 vs. DMSO	Q86UE4	MTDH	Protein LYRIC	0.427269	2.68285	17.1867	17.1117	16.8503	17.1428	17.3759	17.676	17.5478	17.4009
20uM E2 vs. DMSO	Q9NW64	RBM22	Pre-mRNA-splicing factor RBM22	-0.540009	2.68253	16.4946	16.4519	16.2145	16.5166	15.7843	15.6167	15.9878	16.1287
20uM E2 vs. DMSO	Q9NVP2	ASF1B	Histone chaperone ASF1B	-0.395459	2.67951	17.6139	17.5718	17.7561	17.5859	17.0307	17.3486	17.1734	17.3932
20uM E2 vs. DMSO	Q9UEU0	VTI1B	Vesicle transport through interaction with t-SNAREs homolog 1B	-0.378621	2.6696	16.6609	16.9705	16.7476	16.8353	16.2772	16.4633	16.4914	16.468
20uM E2 vs. DMSO	Q96H55	MYO19	Unconventional myosin-XIX	-0.425957	2.66518	15.7741	15.8307	15.751	15.8832	15.176	15.401	15.5826	15.3757
20uM E2 vs. DMSO	Q8N9U0	TC2N	Tandem C2 domains nuclear protein	0.326515	2.65867	16.5431	16.4562	16.5746	16.4955	16.6688	16.9058	16.8937	16.9072
20uM E2 vs. DMSO	P52789	HK2	Hexokinase-2	0.402506	2.65597	17.2614	17.0604	16.9798	16.9373	17.2895	17.494	17.4693	17.5962
20uM E2 vs. DMSO	Q9P1F3	ABRACL	Costars family protein ABRACL	0.266989	2.65577	18.961	18.9959	19.0785	19.168	19.3748	19.3717	19.252	19.2728
20uM E2 vs. DMSO	P15289	ARSA	Arylsulfatase A	0.335718	2.6556	16.533	16.5339	16.4025	16.5935	16.7544	17.0077	16.831	16.8127
20uM E2 vs. DMSO	P13667	PDIA4	Protein disulfide-isomerase A4	0.332512	2.65428	20.7387	20.6085	20.438	20.4497	20.8242	20.8908	20.8517	20.9983
20uM E2 vs. DMSO	Q99715	COL12A1	Collagen alpha-1(XII) chain	-0.769813	2.65391	15.9232	15.2899	15.4984	15.4701	14.5725	15.0505	14.4774	15.002
20uM E2 vs. DMSO	Q8NBU5	ATAD1	Outer mitochondrial transmembrane helix translocase	0.412717	2.65224	19.7368	19.5703	19.4709	19.6252	19.8862	19.9211	19.9664	20.2804
20uM E2 vs. DMSO	P04062	GBA1	Lysosomal acid glucosylceramidase	0.411655	2.65218	17.6859	17.6185	17.512	17.592	17.9007	17.9798	17.8824	18.2922
20uM E2 vs. DMSO	Q07820	MCL1	Induced myeloid leukemia cell differentiation protein Mcl-1	0.745961	2.64685	15.3082	15.0821	14.478	15.0591	15.5792	15.8932	15.6126	15.8263
20uM E2 vs. DMSO	Q96GM8	TOE1	Target of EGR1 protein 1	-0.700205	2.64622	13.4378	13.5085	13.5646	13.8443	12.9663	13.1334	12.6496	12.8051
20uM E2 vs. DMSO	P49755	TMED10	Transmembrane emp24 domain-containing protein 10	0.460659	2.64366	16.2715	16.5773	16.5283	16.7143	16.7902	17.0676	17.0266	17.0497
20uM E2 vs. DMSO	P04632	CAPNS1	Calpain small subunit 1	0.384502	2.64057	20.5485	20.307	20.2745	20.3791	20.5731	20.7052	20.8512	20.9177
20uM E2 vs. DMSO	Q15527	SURF2	Surfeit locus protein 2	-0.296927	2.63674	16.1586	16.0847	16.0219	16.1206	15.7609	15.7981	15.7712	15.8679
20uM E2 vs. DMSO	O75608	LYPLA1	Acyl-protein thioesterase 1	0.33563	2.63654	19.9951	19.9599	19.9379	19.9182	20.1298	20.1915	20.3414	20.4909
20uM E2 vs. DMSO	Q9NQW7	XPNPEP1	Xaa-Pro aminopeptidase 1	0.370146	2.63617	17.3083	17.4748	17.3837	17.3041	17.5614	17.7917	17.6741	17.9245
20uM E2 vs. DMSO	Q969S2	NEIL2	Endonuclease 8-like 2	-0.791709	2.63456	12.9895	13.3962	12.8493	13.1783	12.2887	12.4133	12.0559	12.4887
20uM E2 vs. DMSO	P12955	PEPD	Xaa-Pro dipeptidase	0.358575	2.63254	19.7395	19.7235	19.5426	19.5828	19.8587	19.9754	19.9733	20.2153
20uM E2 vs. DMSO	Q01081	U2AF1	Splicing factor U2AF 35 kDa subunit	0.219068	2.62781	19.3932	19.5221	19.5096	19.456	19.6846	19.6569	19.6535	19.7621
20uM E2 vs. DMSO	Q9UBQ7	GRHPR	Glyoxylate reductase/hydroxypyruvate reductase	0.256868	2.62626	18.547	18.5063	18.4255	18.5397	18.746	18.7743	18.6573	18.8684
20uM E2 vs. DMSO	P06733	ENO1	Alpha-enolase	0.285991	2.62443	23.4089	23.3944	23.3992	23.4383	23.6161	23.5906	23.707	23.871
20uM E2 vs. DMSO	P42771;P42772	CDKN2A;CDKN2B	Cyclin-dependent kinase inhibitor 2A;Cyclin-dependent kinase 4 inhibitor B	-0.613761	2.62155	13.5732	13.573	13.6457	13.7395	13.2748	12.9651	12.8028	13.0336
20uM E2 vs. DMSO	Q9BTZ2	DHRS4	Dehydrogenase/reductase SDR family member 4	0.35979	2.61904	18.6372	18.6774	18.5159	18.4933	18.8262	18.8941	18.8751	19.1675
20uM E2 vs. DMSO	Q13554	CAMK2B	Calcium/calmodulin-dependent protein kinase type II subunit beta	-0.322618	2.61508	19.3879	19.2495	19.2397	19.2505	18.7648	19.0825	18.9656	19.0242
20uM E2 vs. DMSO	O95528	SLC2A10	Solute carrier family 2, facilitated glucose transporter member 10	-0.499174	2.61486	14.0134	14.1979	14.0192	14.1026	13.4247	13.5595	13.6901	13.6621
20uM E2 vs. DMSO	Q8NDT2	RBM15B	Putative RNA-binding protein 15B	-0.797351	2.61475	16.388	16.0706	15.7763	15.9437	15.2903	15.6532	15.2255	14.8203
20uM E2 vs. DMSO	P82909	KGD4	Alpha-ketoglutarate dehydrogenase component 4	0.468541	2.61451	15.8122	15.6528	15.6507	15.5128	16.0078	16.0373	16.0573	16.4002
20uM E2 vs. DMSO	P04181	OAT	Ornithine aminotransferase, mitochondrial	0.415473	2.61383	16.1732	16.0407	15.8364	16.0023	16.2914	16.5039	16.5703	16.3489
20uM E2 vs. DMSO	P51659	HSD17B4	Peroxisomal multifunctional enzyme type 2	0.391094	2.61371	19.4927	19.4726	19.3039	19.2671	19.6399	19.7231	19.7207	20.017
20uM E2 vs. DMSO	Q9NR28	DIABLO	Diablo IAP-binding mitochondrial protein	0.297667	2.61362	19.3358	19.3186	19.2204	19.1591	19.4418	19.5055	19.5757	19.7017
20uM E2 vs. DMSO	O00483	NDUFA4	Cytochrome c oxidase subunit NDUFA4	1.39682	2.61046	12.1824	12.7954	12.8867	12.4784	13.2597	13.6019	14.3049	14.7637
20uM E2 vs. DMSO	Q9Y6I3	EPN1	Epsin-1	0.247004	2.60352	17.4406	17.3224	17.3084	17.3434	17.5215	17.6313	17.62	17.6301
20uM E2 vs. DMSO	P49748	ACADVL	Very long-chain specific acyl-CoA dehydrogenase, mitochondrial	0.345439	2.6032	19.2415	19.2337	19.1019	19.0035	19.4713	19.3489	19.4799	19.6624
20uM E2 vs. DMSO	O75170	PPP6R2	Serine/threonine-protein phosphatase 6 regulatory subunit 2	0.342669	2.60139	18.8191	18.7638	18.6446	18.5721	18.8984	18.9756	19.1616	19.1348
20uM E2 vs. DMSO	Q99755	PIP5K1A	Phosphatidylinositol 4-phosphate 5-kinase type-1 alpha	-0.433582	2.59741	15.1323	15.0181	14.8935	15.0799	14.6781	14.6379	14.415	14.6585
20uM E2 vs. DMSO	P39880	CUX1	Homeobox protein cut-like 1	-1.44054	2.59488	14.7906	13.2828	14.5813	14.6563	13.2882	12.4741	12.7116	13.0749
20uM E2 vs. DMSO	Q96JP5	ZFP91	E3 ubiquitin-protein ligase ZFP91	0.52675	2.58435	16.3914	16.1946	16.4277	15.9073	16.621	16.6722	16.8256	16.9093
20uM E2 vs. DMSO	Q8NCF5	NFATC2IP	NFATC2-interacting protein	-0.521522	2.58363	15.8845	15.8575	15.9216	15.9685	15.1635	15.3233	15.3106	15.7487
20uM E2 vs. DMSO	Q96DG6	CMBL	Carboxymethylenebutenolidase homolog	0.353991	2.58362	20.3569	20.1807	20.1423	20.2577	20.4064	20.6004	20.5623	20.7845
20uM E2 vs. DMSO	P42166	TMPO	Lamina-associated polypeptide 2, isoform alpha	-0.333934	2.58248	20.8117	20.7273	20.5924	20.6542	20.1882	20.3576	20.3735	20.5304
20uM E2 vs. DMSO	Q96AQ6	PBXIP1	Pre-B-cell leukemia transcription factor-interacting protein 1	0.935638	2.57978	14.2982	13.9918	13.5503	14.4873	14.6126	15.0847	15.3164	15.0565
20uM E2 vs. DMSO	O15254	ACOX3	Peroxisomal acyl-coenzyme A oxidase 3	0.498278	2.57811	15.5998	15.4903	15.4565	15.3773	15.9801	15.9373	15.7267	16.2729
20uM E2 vs. DMSO	P04040	CAT	Catalase	0.474199	2.57695	19.262	19.2005	19.0102	19.0056	19.4226	19.5542	19.4823	19.9159
20uM E2 vs. DMSO	Q9P215	POGK	Pogo transposable element with KRAB domain	-0.959972	2.57661	14.2865	14.514	14.6064	13.6964	13.4198	12.9384	13.6256	13.2797
20uM E2 vs. DMSO	Q16698	DECR1	2,4-dienoyl-CoA reductase [(3E)-enoyl-CoA-producing], mitochondrial	0.361984	2.57623	19.2817	19.2519	19.2459	19.3295	19.6302	19.5058	19.5213	19.8995
20uM E2 vs. DMSO	Q9UPX8	SHANK2	SH3 and multiple ankyrin repeat domains protein 2	-0.382268	2.57536	16.2615	16.1166	15.9608	16.1338	15.7484	15.6682	15.6458	15.8812
20uM E2 vs. DMSO	Q5U5Q3	MEX3C	RNA-binding E3 ubiquitin-protein ligase MEX3C	-0.439456	2.57308	17.0103	16.8177	16.9614	17.0579	16.4743	16.5538	16.2969	16.7645
20uM E2 vs. DMSO	Q96GX9	APIP	Methylthioribulose-1-phosphate dehydratase	0.340932	2.57191	17.8084	17.5184	17.5624	17.624	17.8888	17.9626	17.9107	18.115
20uM E2 vs. DMSO	O94992	HEXIM1	Protein HEXIM1	-0.272031	2.57071	17.1132	17.0827	17.1142	17.0351	16.7433	16.8074	16.7668	16.9395
20uM E2 vs. DMSO	Q5T447	HECTD3	E3 ubiquitin-protein ligase HECTD3	0.39313	2.56662	16.1628	16.0116	15.974	16.002	16.3091	16.6371	16.3046	16.4722
20uM E2 vs. DMSO	O00584	RNASET2	Ribonuclease T2	0.378098	2.56658	17.3606	17.1143	17.1757	17.2095	17.4669	17.6005	17.4977	17.8074
20uM E2 vs. DMSO	Q8N806	UBR7	Putative E3 ubiquitin-protein ligase UBR7	-0.430436	2.56598	17.4531	17.2633	17.138	17.3102	16.8376	16.9174	16.6341	17.0537
20uM E2 vs. DMSO	Q53GG5	PDLIM3	PDZ and LIM domain protein 3	-0.482133	2.56462	17.7744	17.2893	17.5261	17.6546	16.8825	17.0582	17.1491	17.226
20uM E2 vs. DMSO	P62942	FKBP1A	Peptidyl-prolyl cis-trans isomerase FKBP1A	0.380687	2.55949	20.4526	20.2216	20.2143	20.2643	20.4482	20.7297	20.6508	20.8468
20uM E2 vs. DMSO	Q9NZZ3	CHMP5	Charged multivesicular body protein 5	0.295775	2.55852	17.2333	17.288	17.019	17.1738	17.4189	17.4552	17.5041	17.519
20uM E2 vs. DMSO	P35244	RPA3	Replication protein A 14 kDa subunit	-0.266639	2.55749	18.6359	18.5496	18.4774	18.4221	18.2454	18.2411	18.1853	18.3468
20uM E2 vs. DMSO	P55072	VCP	Transitional endoplasmic reticulum ATPase	0.277524	2.55747	23.8681	23.7957	23.6384	23.706	23.9596	24.0976	23.9688	24.0923
20uM E2 vs. DMSO	Q96PE2	ARHGEF17	Rho guanine nucleotide exchange factor 17	-0.476499	2.55457	15.3156	15.1559	15.1591	15.2824	14.8521	14.4843	14.7459	14.9246
20uM E2 vs. DMSO	P30046	DDT	D-dopachrome decarboxylase	0.301345	2.55418	20.4806	20.2794	20.315	20.3079	20.5461	20.6745	20.5656	20.8022
20uM E2 vs. DMSO	B4DXR9;Q15928	ZNF732;ZNF141	Zinc finger protein 732;Zinc finger protein 141	-0.636441	2.55259	13.3805	13.2839	13.4541	13.4735	12.5396	12.6375	12.8999	12.9691
20uM E2 vs. DMSO	P28070	PSMB4	Proteasome subunit beta type-4	0.296037	2.55027	20.425	20.271	20.2317	20.1487	20.4418	20.6235	20.5618	20.6335
20uM E2 vs. DMSO	Q9HCC0	MCCC2	Methylcrotonoyl-CoA carboxylase beta chain, mitochondrial	0.27102	2.54536	19.2854	19.291	19.3088	19.2957	19.4232	19.5974	19.5244	19.72
20uM E2 vs. DMSO	P07203	GPX1	Glutathione peroxidase 1	-0.355505	2.54518	19.6374	19.412	19.3777	19.4035	19.0783	19.0291	18.9967	19.3045
20uM E2 vs. DMSO	Q96EN9	REX1BD	Required for excision 1-B domain-containing protein	0.601358	2.5442	14.5068	14.344	14.1652	13.9873	14.7787	15.0648	14.9232	14.642
20uM E2 vs. DMSO	Q9GZM5	YIPF3	Protein YIPF3	0.431552	2.54399	15.8331	15.9714	15.8455	15.7053	16.0534	16.2379	16.3131	16.4772
20uM E2 vs. DMSO	Q68CZ6	HAUS3	HAUS augmin-like complex subunit 3	-1.40472	2.54286	12.6333	12.204	12.4537	12.8144	11.6335	10.3774	11.7131	10.7624
20uM E2 vs. DMSO	Q9BRX2	PELO	Protein pelota homolog	0.680306	2.54162	16.9917	16.4211	17.0424	16.3597	17.2377	17.4751	17.3457	17.4776
20uM E2 vs. DMSO	Q14232	EIF2B1	Translation initiation factor eIF2B subunit alpha	0.242523	2.54157	17.1349	17.1999	17.2873	17.2428	17.4332	17.4235	17.5193	17.4589
20uM E2 vs. DMSO	Q9NQT4	EXOSC5	Exosome complex component RRP46	-0.345953	2.54112	16.5163	16.5773	16.3934	16.4963	15.9761	16.2333	16.2524	16.1379
20uM E2 vs. DMSO	O14578	CIT	Citron Rho-interacting kinase	-0.716356	2.53922	16.9937	16.6859	16.8464	16.5127	16.0725	16.3694	15.5662	16.1652
20uM E2 vs. DMSO	Q13425	SNTB2	Beta-2-syntrophin	-0.259182	2.53853	16.5583	16.5676	16.6196	16.5797	16.3759	16.3062	16.2428	16.3636
20uM E2 vs. DMSO	O94776	MTA2	Metastasis-associated protein MTA2	-0.281627	2.53425	19.096	18.9181	18.886	18.8576	18.5882	18.6008	18.7004	18.7418
20uM E2 vs. DMSO	P40763	STAT3	Signal transducer and activator of transcription 3	0.340814	2.52965	17.3722	17.1393	17.2332	17.189	17.3885	17.6561	17.666	17.5865
20uM E2 vs. DMSO	Q13557	CAMK2D	Calcium/calmodulin-dependent protein kinase type II subunit delta	-0.298013	2.5255	18.621	18.5448	18.4875	18.4251	18.0729	18.3486	18.2457	18.2193
20uM E2 vs. DMSO	P26374	CHML	Rab proteins geranylgeranyltransferase component A 2	-0.591578	2.52517	13.5511	13.5869	13.4519	13.434	13.131	12.7552	12.7676	13.0037
20uM E2 vs. DMSO	Q5TFE4	NT5DC1	5'-nucleotidase domain-containing protein 1	-0.304435	2.52229	18.8328	18.6451	18.6146	18.6836	18.3497	18.3301	18.3233	18.5553
20uM E2 vs. DMSO	O14734	ACOT8	Acyl-coenzyme A thioesterase 8	0.334373	2.51923	16.0682	16.1168	16.2073	15.9717	16.3804	16.3152	16.4672	16.5388
20uM E2 vs. DMSO	Q9HA64	FN3KRP	Ketosamine-3-kinase	-0.215051	2.51632	18.2822	18.1986	18.247	18.3232	18.1025	18.058	18.0121	18.0181
20uM E2 vs. DMSO	Q99614	TTC1	Tetratricopeptide repeat protein 1	0.358574	2.51615	18.3909	18.2955	18.19	18.2585	18.4153	18.6409	18.7087	18.8044
20uM E2 vs. DMSO	Q15262	PTPRK	Receptor-type tyrosine-protein phosphatase kappa	-0.494201	2.51229	17.1767	16.9201	16.7355	16.8147	16.5641	16.4721	16.1554	16.4787
20uM E2 vs. DMSO	P42898	MTHFR	Methylenetetrahydrofolate reductase (NADPH)	0.604262	2.51229	15.0273	14.5551	14.7065	14.7511	15.0541	15.548	15.2932	15.5619
20uM E2 vs. DMSO	P80303	NUCB2	Nucleobindin-2	1.06121	2.5109	17.155	16.1042	16.1258	16.31	17.3206	17.0433	17.8598	17.7161
20uM E2 vs. DMSO	P11274	BCR	Breakpoint cluster region protein	-0.544343	2.51045	15.6414	16.1335	15.6236	15.6936	15.0206	15.2733	15.316	15.3048
20uM E2 vs. DMSO	Q14376	GALE	UDP-glucose 4-epimerase	0.371084	2.50973	19.053	18.8599	19.1166	18.9615	19.1777	19.4679	19.2944	19.5353
20uM E2 vs. DMSO	Q14247	CTTN	Src substrate cortactin	0.294012	2.50248	20.012	19.9465	20.0156	20.0459	20.1244	20.3251	20.2788	20.4677
20uM E2 vs. DMSO	O43150	ASAP2	Arf-GAP with SH3 domain, ANK repeat and PH domain-containing protein 2	-0.436023	2.49713	16.6711	16.7675	16.5482	16.508	16.1779	16.3886	15.9393	16.2449
20uM E2 vs. DMSO	Q9H4L7	SMARCAD1	SWI/SNF-related matrix-associated actin-dependent regulator of chromatin subfamily A containing DEAD/H box 1	-0.33492	2.49589	16.1067	15.9876	16.0004	15.9924	15.6055	15.8192	15.5746	15.7482
20uM E2 vs. DMSO	Q8NFV4	ABHD11	sn-1-specific diacylglycerol lipase ABHD11	0.31956	2.49364	20.6635	20.6131	20.4628	20.4587	20.8127	20.8002	20.7996	21.0638
20uM E2 vs. DMSO	P53007	SLC25A1	Tricarboxylate transport protein, mitochondrial	1.05734	2.49259	12.9421	12.9909	12.6119	13.5694	13.9303	13.7484	13.9661	14.6988
20uM E2 vs. DMSO	Q6JBY9	RCSD1	CapZ-interacting protein	0.492566	2.49174	17.2022	17.3763	16.8334	17.159	17.5729	17.4889	17.6417	17.8378
20uM E2 vs. DMSO	Q15003	NCAPH	Condensin complex subunit 2	-0.296149	2.49016	17.2	17.4142	17.4501	17.413	17.1356	17.1013	17.0644	16.9913
20uM E2 vs. DMSO	Q9BPZ7	MAPKAP1	Target of rapamycin complex 2 subunit MAPKAP1	0.928987	2.48912	14.2657	14.1558	13.6639	14.035	14.7174	15.2306	14.4592	15.429
20uM E2 vs. DMSO	P28072	PSMB6	Proteasome subunit beta type-6	0.364301	2.48708	21.3834	21.2433	21.239	21.1835	21.4055	21.7182	21.5688	21.8137
20uM E2 vs. DMSO	Q8NBT2	SPC24	Kinetochore protein Spc24	-0.455452	2.48689	15.3513	15.2161	15.539	15.2428	14.8179	15.0572	14.7187	14.9336
20uM E2 vs. DMSO	P52732	KIF11	Kinesin-like protein KIF11	-0.351065	2.48146	18.1287	17.9381	17.8767	17.9015	17.4526	17.6592	17.5556	17.7734
20uM E2 vs. DMSO	P16144	ITGB4	Integrin beta-4	-1.48217	2.47801	17.157	16.7219	16.9269	16.8219	14.3447	15.2222	16.3898	15.7424
20uM E2 vs. DMSO	P25786	PSMA1	Proteasome subunit alpha type-1	0.309699	2.47499	21.1725	21.0851	20.9283	20.9879	21.2161	21.3157	21.3762	21.5047
20uM E2 vs. DMSO	Q13643	FHL3	Four and a half LIM domains protein 3	0.573548	2.47439	13.9707	13.6675	13.6784	13.9546	14.1151	14.4996	14.3791	14.5716
20uM E2 vs. DMSO	P20742	PZP	Pregnancy zone protein	-0.680756	2.47415	15.3337	14.6858	15.1048	15.2492	14.3231	14.7093	14.1881	14.43
20uM E2 vs. DMSO	Q92994	BRF1	Transcription factor IIIB 90 kDa subunit	-0.543698	2.47364	14.6119	14.7411	14.6861	14.2166	13.9907	14.1177	13.9717	14.0008
20uM E2 vs. DMSO	A3KN83	SBNO1	Protein strawberry notch homolog 1	-0.39519	2.47349	16.7404	16.7923	16.4883	16.6233	16.2339	16.2688	16.109	16.452
20uM E2 vs. DMSO	Q14997	PSME4	Proteasome activator complex subunit 4	0.322073	2.47221	16.0055	15.9966	15.9187	15.8902	16.1311	16.2822	16.2718	16.4141
20uM E2 vs. DMSO	Q99985	SEMA3C	Semaphorin-3C	-1.20948	2.46948	13.2921	13.8936	13.4599	14.2376	13.1577	12.505	11.8935	12.4891
20uM E2 vs. DMSO	O43847	NRDC	Nardilysin	0.23001	2.46906	18.8233	18.7399	18.7107	18.7404	18.937	18.9248	18.9703	19.1023
20uM E2 vs. DMSO	Q9H0E9	BRD8	Bromodomain-containing protein 8	-0.358708	2.46819	16.3045	16.28	16.1621	16.2424	15.8889	15.7144	15.8765	16.0745
20uM E2 vs. DMSO	Q13309	SKP2	S-phase kinase-associated protein 2	-4.20797	2.46801	16.8395	16.8556	16.4351	16.8175	12.0537	11.0636	16.2429	10.7558
20uM E2 vs. DMSO	Q8N201	INTS1	Integrator complex subunit 1	-0.244264	2.46734	17.1044	17.0445	17.0959	16.9987	16.7554	16.7982	16.8183	16.8946
20uM E2 vs. DMSO	Q99735	MGST2	Microsomal glutathione S-transferase 2	0.325301	2.46359	16.0639	16.0756	15.9581	16.1171	16.207	16.4737	16.4251	16.41
20uM E2 vs. DMSO	O00330	PDHX	Pyruvate dehydrogenase protein X component, mitochondrial	0.437462	2.46081	16.0472	15.7528	15.6532	15.6582	16.2823	16.1384	16.094	16.3465
20uM E2 vs. DMSO	P57764	GSDMD	Gasdermin-D	-0.505081	2.45887	16.6529	16.6641	16.3844	16.1663	15.8328	16.1229	16.0094	15.8824
20uM E2 vs. DMSO	Q9H0U9	TSPYL1	Testis-specific Y-encoded-like protein 1	0.321272	2.45644	15.4058	15.4241	15.4296	15.466	15.629	15.889	15.7358	15.7568
20uM E2 vs. DMSO	O43166	SIPA1L1	Signal-induced proliferation-associated 1-like protein 1	-0.497921	2.45638	14.6608	14.6429	14.5221	14.299	14.0617	13.9386	13.9291	14.2038
20uM E2 vs. DMSO	O00560	SDCBP	Syntenin-1	0.260168	2.45577	16.5003	16.5024	16.5307	16.423	16.6536	16.7972	16.7362	16.8101
20uM E2 vs. DMSO	O43299	AP5Z1	AP-5 complex subunit zeta-1	0.44426	2.45258	13.7771	13.8283	13.7127	13.8828	14.107	14.3658	14.1906	14.3147
20uM E2 vs. DMSO	P16152	CBR1	Carbonyl reductase [NADPH] 1	0.359845	2.45084	18.5576	18.636	18.5404	18.6033	18.7276	18.9021	18.9611	19.1858
20uM E2 vs. DMSO	Q9NYC9	DNAH9	Dynein axonemal heavy chain 9	0.433819	2.44736	15.2988	15.4684	15.1673	15.2807	15.6136	15.6679	15.6853	15.9839
20uM E2 vs. DMSO	Q8TBG4	ETNPPL	Ethanolamine-phosphate phospho-lyase	0.416937	2.44735	14.9472	15.1078	14.9475	15.2504	15.5193	15.3429	15.4408	15.6177
20uM E2 vs. DMSO	O00291	HIP1	Huntingtin-interacting protein 1	0.652292	2.44577	16.4848	16.6227	16.675	17.0477	17.068	17.716	17.4748	17.1805
20uM E2 vs. DMSO	Q15477	SKIC2	Superkiller complex protein 2	0.281107	2.4447	16.5718	16.5802	16.4565	16.4262	16.7128	16.7664	16.7874	16.8925
20uM E2 vs. DMSO	Q96HL8	SH3YL1	SH3 domain-containing YSC84-like protein 1	-0.374903	2.44359	15.0748	15.1389	14.958	15.0234	14.6654	14.6937	14.543	14.7934
20uM E2 vs. DMSO	Q9BWD1	ACAT2	Acetyl-CoA acetyltransferase, cytosolic	0.24006	2.44037	19.4646	19.3904	19.4605	19.4363	19.5591	19.8019	19.6359	19.7152
20uM E2 vs. DMSO	Q5VZL5	ZMYM4	Zinc finger MYM-type protein 4	-0.463631	2.43893	15.8315	15.7688	15.4717	15.7238	15.2598	15.3241	15.366	14.9915
20uM E2 vs. DMSO	Q96HR9	REEP6	Receptor expression-enhancing protein 6	0.363968	2.43836	15.8023	15.8802	15.7617	15.938	16.1309	16.2671	16.0542	16.3858
20uM E2 vs. DMSO	Q12824	SMARCB1	SWI/SNF-related matrix-associated actin-dependent regulator of chromatin subfamily B member 1	-0.236125	2.43379	16.6869	16.7008	16.6782	16.7399	16.4543	16.5343	16.4306	16.4421
20uM E2 vs. DMSO	Q9NXR1	NDE1	Nuclear distribution protein nudE homolog 1	-0.676605	2.43349	15.538	15.3078	15.164	15.2715	15.0539	14.779	14.4297	14.3123
20uM E2 vs. DMSO	Q9Y448	KNSTRN	Small kinetochore-associated protein	-0.917202	2.4313	16.2743	16.3888	16.0366	16.22	14.8395	15.7008	15.8243	14.8864
20uM E2 vs. DMSO	Q9Y2H0	DLGAP4	Disks large-associated protein 4	0.301325	2.42777	17.0323	16.994	16.8995	16.8555	17.1737	17.3983	17.1538	17.2609
20uM E2 vs. DMSO	Q8IYR2	SMYD4	SET and MYND domain-containing protein 4	-0.644473	2.42619	13.2331	13.4154	13.3694	13.184	12.6856	12.8395	12.7673	12.3316
20uM E2 vs. DMSO	P35998	PSMC2	26S proteasome regulatory subunit 7	0.322671	2.42566	20.1641	19.9817	19.8885	19.9556	20.1819	20.3089	20.297	20.4927
20uM E2 vs. DMSO	P27105	STOM	Stomatin	0.691955	2.42318	15.1265	15.2574	14.4765	15.0525	15.5393	15.7249	15.5093	15.9071
20uM E2 vs. DMSO	Q9NQW6	ANLN	Anillin	-1.37228	2.41974	17.005	17.063	16.94	17.0559	14.7165	15.4118	15.7204	16.726
20uM E2 vs. DMSO	O14545	TRAFD1	TRAF-type zinc finger domain-containing protein 1	-0.34514	2.41961	16.5818	16.4221	16.4445	16.3317	15.9403	16.211	16.0746	16.1736
20uM E2 vs. DMSO	Q96BN2	TADA1	Transcriptional adapter 1	-0.852972	2.4175	14.1713	13.6108	13.8768	13.9708	12.4871	13.3576	13.1241	13.249
20uM E2 vs. DMSO	Q9Y2E5	MAN2B2	Epididymis-specific alpha-mannosidase	0.814509	2.41715	15.3629	15.5346	15.2106	14.505	15.8861	15.9571	15.8428	16.185
20uM E2 vs. DMSO	Q15054	POLD3	DNA polymerase delta subunit 3	-0.751363	2.41713	16.4505	16.6383	16.3695	16.235	15.927	15.0649	15.8801	15.816
20uM E2 vs. DMSO	P00403	MT-CO2	Cytochrome c oxidase subunit 2	1.1728	2.41655	13.2325	14.136	13.6786	14.1739	14.5294	14.6498	15.0162	15.7169
20uM E2 vs. DMSO	Q9UBS4	DNAJB11	DnaJ homolog subfamily B member 11	0.255026	2.41538	17.6916	17.7346	17.5557	17.6913	17.9568	18.018	17.8588	17.8598
20uM E2 vs. DMSO	Q68CP9	ARID2	AT-rich interactive domain-containing protein 2	-0.806714	2.41421	16.3639	15.4431	15.5489	16.221	15.029	15.1484	15.0151	15.1575
20uM E2 vs. DMSO	Q96HS1	PGAM5	Serine/threonine-protein phosphatase PGAM5, mitochondrial	0.553673	2.41326	15.8614	15.9322	15.8493	15.5423	16.2248	16.2269	16.2129	16.7353
20uM E2 vs. DMSO	Q5R372	RABGAP1L	Rab GTPase-activating protein 1-like	0.314483	2.41308	16.64	16.5975	16.4426	16.6207	17.0131	16.7955	16.7933	16.9569
20uM E2 vs. DMSO	Q8NC96	NECAP1	Adaptin ear-binding coat-associated protein 1	0.297938	2.41082	16.1829	16.201	16.0411	16.1864	16.5424	16.4952	16.3276	16.4378
20uM E2 vs. DMSO	Q9UBS8	RNF14	E3 ubiquitin-protein ligase RNF14	0.320187	2.40901	16.4901	16.6226	16.5991	16.6244	16.7456	17.0265	16.8385	17.0063
20uM E2 vs. DMSO	P20810	CAST	Calpastatin	0.34054	2.39918	16.9531	16.7371	16.6569	16.7555	17.1249	17.2671	16.9931	17.0797
20uM E2 vs. DMSO	P49720	PSMB3	Proteasome subunit beta type-3	0.342933	2.39883	20.475	20.3028	20.2527	20.2223	20.5008	20.7014	20.5707	20.8517
20uM E2 vs. DMSO	Q8N3K9	CMYA5	Cardiomyopathy-associated protein 5	0.363349	2.39868	17.5483	17.5813	17.5714	17.521	17.9148	18.0189	17.6493	18.0925
20uM E2 vs. DMSO	Q15392	DHCR24	Delta(24)-sterol reductase	0.407459	2.39707	17.2819	17.4414	17.3095	17.3779	17.4701	17.7895	17.7937	17.9873
20uM E2 vs. DMSO	P60900	PSMA6	Proteasome subunit alpha type-6	0.285961	2.39667	20.8454	20.7356	20.6328	20.6491	20.8686	21.009	20.9799	21.1493
20uM E2 vs. DMSO	Q4KWH8	PLCH1	1-phosphatidylinositol 4,5-bisphosphate phosphodiesterase eta-1	0.542834	2.39623	16.2851	15.7823	15.7231	16.0051	16.2717	16.6029	16.444	16.6483
20uM E2 vs. DMSO	P28074	PSMB5	Proteasome subunit beta type-5	0.347247	2.39356	20.1994	19.9091	19.9864	19.9676	20.1732	20.4383	20.3275	20.5125
20uM E2 vs. DMSO	Q9UFC0	LRWD1	Leucine-rich repeat and WD repeat-containing protein 1	-0.285635	2.39349	16.4288	16.3388	16.2544	16.3236	15.9419	16.0748	16.0642	16.1222
20uM E2 vs. DMSO	Q969Q0	RPL36AL	Ribosomal protein eL42-like	0.335341	2.39313	16.5354	16.5088	16.6525	16.773	16.807	16.9271	17.0259	17.0509
20uM E2 vs. DMSO	Q9UKN8	GTF3C4	General transcription factor 3C polypeptide 4	-0.322101	2.39297	18.174	18.1043	17.9241	17.9599	17.6387	17.7707	17.6049	17.8596
20uM E2 vs. DMSO	P41247	PNPLA4	Patatin-like phospholipase domain-containing protein 4	0.374792	2.38925	14.2848	14.4542	14.4118	14.5031	14.7658	14.6949	14.8537	14.8387
20uM E2 vs. DMSO	P12429	ANXA3	Annexin A3	-0.347897	2.38794	21.3911	21.3232	21.2528	20.9874	20.8493	20.8638	20.8329	21.017
20uM E2 vs. DMSO	Q8N9N7	LRRC57	Leucine-rich repeat-containing protein 57	-0.409293	2.38785	15.1912	15.4163	15.3657	15.504	15.1096	14.8733	14.8328	15.0243
20uM E2 vs. DMSO	Q8IYT2	CMTR2	Cap-specific mRNA (nucleoside-2'-O-)-methyltransferase 2	-0.712034	2.38577	15.5568	15.8172	15.7096	15.8605	15.1268	14.4558	15.3419	15.1715
20uM E2 vs. DMSO	P63000	RAC1	Ras-related C3 botulinum toxin substrate 1	0.314655	2.38553	20.9003	20.9046	20.8372	21.0077	21.032	21.1823	21.2923	21.4018
20uM E2 vs. DMSO	P17980	PSMC3	26S proteasome regulatory subunit 6A	0.285604	2.38405	20.6782	20.524	20.4972	20.5448	20.7097	20.875	20.7908	21.0111
20uM E2 vs. DMSO	Q7Z3E5	ARMC9	LisH domain-containing protein ARMC9	-0.933988	2.38342	14.6042	14.1163	13.9512	14.3099	13.0872	13.9743	13.1979	12.9862
20uM E2 vs. DMSO	Q5JYT7	KIAA1755	Uncharacterized protein KIAA1755	0.373468	2.37842	17.5143	17.4706	17.2151	17.2566	17.621	17.8528	17.6159	17.8607
20uM E2 vs. DMSO	O43852	CALU	Calumenin	0.349735	2.37813	19.1393	19.0229	18.92	18.992	19.2406	19.2681	19.345	19.6193
20uM E2 vs. DMSO	P30038	ALDH4A1	Delta-1-pyrroline-5-carboxylate dehydrogenase, mitochondrial	0.393223	2.37669	20.7437	20.6159	20.5729	20.4316	20.8896	20.9031	20.8774	21.2669
20uM E2 vs. DMSO	Q8NHQ9	DDX55	ATP-dependent RNA helicase DDX55	-0.386888	2.37664	14.9195	14.868	14.8507	15.0473	14.6718	14.5739	14.412	14.4803
20uM E2 vs. DMSO	Q16775	HAGH	Hydroxyacylglutathione hydrolase, mitochondrial	0.294529	2.37387	18.1924	18.0071	17.9126	18.0252	18.2313	18.2905	18.3377	18.4559
20uM E2 vs. DMSO	O94952	FBXO21	F-box only protein 21	-0.362745	2.37323	15.4256	15.4537	15.4826	15.3874	14.9161	15.0639	15.2618	15.0565
20uM E2 vs. DMSO	Q9BW60	ELOVL1	Very long chain fatty acid elongase 1	0.7641	2.37139	13.2257	13.5233	12.7598	13.4317	13.8628	13.817	14.3068	14.0102
20uM E2 vs. DMSO	Q9NVX2	NLE1	Notchless protein homolog 1	-0.233006	2.37087	17.086	16.9552	17.0041	16.9345	16.7607	16.7573	16.7359	16.7939
20uM E2 vs. DMSO	Q9H8W4	PLEKHF2	Pleckstrin homology domain-containing family F member 2	0.208645	2.37067	18.5843	18.5468	18.4567	18.4869	18.6722	18.7332	18.7017	18.8022
20uM E2 vs. DMSO	O60271	SPAG9	C-Jun-amino-terminal kinase-interacting protein 4	0.341756	2.37034	17.7048	17.6972	17.5912	17.6831	17.762	18.0506	18.0536	18.177
20uM E2 vs. DMSO	P14735	IDE	Insulin-degrading enzyme	0.311631	2.36988	19.1275	19.0607	18.9589	18.9889	19.1846	19.2831	19.3742	19.5406
20uM E2 vs. DMSO	Q15390	MTFR1	Mitochondrial fission regulator 1	0.521022	2.3675	13.6093	13.7469	13.5271	13.8348	14.0519	14.4294	14.2597	14.0612
20uM E2 vs. DMSO	O60313	OPA1	Dynamin-like 120 kDa protein, mitochondrial	0.246393	2.3665	16.6916	16.674	16.5761	16.6919	16.8366	16.8706	16.9298	16.9822
20uM E2 vs. DMSO	Q12840	KIF5A	Kinesin heavy chain isoform 5A	4.20952	2.36602	12.219	11.0869	16.6287	11.0421	16.9681	17.0326	16.704	17.1102
20uM E2 vs. DMSO	Q09028	RBBP4	Histone-binding protein RBBP4	-0.279939	2.36467	20.892	20.7127	20.6487	20.6488	20.351	20.4292	20.4244	20.5777
20uM E2 vs. DMSO	Q9Y305	ACOT9	Acyl-coenzyme A thioesterase 9, mitochondrial	0.313976	2.36273	18.4478	18.2066	18.3188	18.2961	18.5294	18.6183	18.5509	18.8265
20uM E2 vs. DMSO	Q8NEZ5	FBXO22	F-box only protein 22	-0.260203	2.36221	16.7889	16.743	16.6264	16.8323	16.4577	16.4825	16.4699	16.5397
20uM E2 vs. DMSO	Q8TAC2	JOSD2	Josephin-2	0.75445	2.36156	13.8283	13.874	13.3088	13.8966	14.1379	14.8338	14.634	14.3199
20uM E2 vs. DMSO	Q9BRQ3	NUDT22	Uridine diphosphate glucose pyrophosphatase NUDT22	0.40022	2.35569	15.1415	15.32	15.1768	15.15	15.357	15.6541	15.6215	15.7564
20uM E2 vs. DMSO	Q9BYX2	TBC1D2	TBC1 domain family member 2A	1.02133	2.35476	12.8269	12.4312	13.1062	12.0159	13.2699	13.9551	13.4182	13.8225
20uM E2 vs. DMSO	Q4G0X4	KCTD21	BTB/POZ domain-containing protein KCTD21	0.913904	2.35392	13.2175	12.4316	12.399	12.7689	13.5613	13.9674	13.7442	13.1997
20uM E2 vs. DMSO	Q6BDS2	BLTP3A	Bridge-like lipid transfer protein family member 3A	-0.491171	2.35324	14.0224	14.2107	14.0349	13.8985	13.4116	13.7179	13.462	13.6103
20uM E2 vs. DMSO	Q96C36	PYCR2	Pyrroline-5-carboxylate reductase 2	-0.370529	2.35291	19.5927	19.3126	19.3616	19.1818	19.1141	19.0626	18.8276	18.9623
20uM E2 vs. DMSO	Q969R8	ITFG2	KICSTOR complex protein ITFG2	-0.567577	2.35192	14.571	14.5847	14.251	14.3643	14.0102	13.5351	14.0172	13.9382
20uM E2 vs. DMSO	O43924	PDE6D	Retinal rod rhodopsin-sensitive cGMP 3',5'-cyclic phosphodiesterase subunit delta	-0.270663	2.35192	17.3046	17.0498	17.1239	17.1832	16.8334	16.9385	16.8824	16.9247
20uM E2 vs. DMSO	Q5VT25	CDC42BPA	Serine/threonine-protein kinase MRCK alpha	-0.409079	2.35066	14.8593	14.6386	14.763	14.696	14.2873	14.4208	14.4439	14.1685
20uM E2 vs. DMSO	Q9UKL6	PCTP	Phosphatidylcholine transfer protein	0.465049	2.34937	17.1078	17.2436	16.9536	16.9751	17.2676	17.6538	17.4252	17.7937
20uM E2 vs. DMSO	Q8IXQ6	PARP9	Protein mono-ADP-ribosyltransferase PARP9	0.46044	2.34774	15.3416	15.1591	15.0957	15.2658	15.3644	15.758	15.8521	15.7294
20uM E2 vs. DMSO	Q96GY3	LIN37	Protein lin-37 homolog	-1.34697	2.34725	12.8703	12.6419	13.5459	12.4184	11.3322	10.8685	12.2794	11.6086
20uM E2 vs. DMSO	O43930;P51817	PRKY;PRKX	Putative serine/threonine-protein kinase PRKY;cAMP-dependent protein kinase catalytic subunit PRKX	-0.271246	2.34642	17.6769	17.6306	17.45	17.4936	17.2241	17.3203	17.2558	17.3659
20uM E2 vs. DMSO	P05141	SLC25A5	ADP/ATP translocase 2	0.677468	2.34277	15.8801	16.1316	16.2833	16.1399	16.4634	16.57	16.8084	17.303
20uM E2 vs. DMSO	Q96EK4	THAP11	THAP domain-containing protein 11	-0.306801	2.34174	15.613	15.4865	15.6245	15.5998	15.215	15.2895	15.214	15.378
20uM E2 vs. DMSO	Q96H79	ZC3HAV1L	Zinc finger CCCH-type antiviral protein 1-like	-0.426516	2.34037	17.0679	16.8286	16.8712	16.7635	16.3725	16.6758	16.5519	16.2249
20uM E2 vs. DMSO	Q53EL6	PDCD4	Programmed cell death protein 4	-0.208703	2.34024	17.4017	17.3812	17.311	17.4127	17.1524	17.1595	17.1453	17.2146
20uM E2 vs. DMSO	Q96CW1	AP2M1	AP-2 complex subunit mu	0.21788	2.33922	19.4262	19.4114	19.4526	19.4894	19.6017	19.6636	19.5927	19.7931
20uM E2 vs. DMSO	Q15149	PLEC	Plectin	0.32174	2.33919	20.9767	20.768	20.8455	20.779	20.9946	21.3338	21.0787	21.2491
20uM E2 vs. DMSO	P55036	PSMD4	26S proteasome non-ATPase regulatory subunit 4	0.320169	2.3382	18.7035	18.6605	18.6205	18.7439	18.8782	18.8948	18.9922	19.2439
20uM E2 vs. DMSO	Q96J01	THOC3	THO complex subunit 3	-0.438735	2.32903	19.1024	18.7728	18.8951	18.8914	18.5512	18.475	18.1752	18.7055
20uM E2 vs. DMSO	Q9NUI1	DECR2	Peroxisomal 2,4-dienoyl-CoA reductase [(3E)-enoyl-CoA-producing]	0.313713	2.32837	16.9129	16.8711	16.9262	16.7576	17.0586	17.2188	17.0872	17.3581
20uM E2 vs. DMSO	P61960	UFM1	Ubiquitin-fold modifier 1	0.239574	2.3274	17.9128	17.8523	17.8089	17.8727	18.0294	18.0741	18.057	18.2446
20uM E2 vs. DMSO	P12532	CKMT1A	Creatine kinase U-type, mitochondrial	0.326294	2.32647	19.9982	19.9524	19.8348	19.7182	20.1683	20.0848	20.1554	20.4003
20uM E2 vs. DMSO	P37198	NUP62	Nuclear pore glycoprotein p62	-0.249418	2.32558	17.3418	17.3429	17.3082	17.3002	17.1962	17.081	17.0688	16.9494
20uM E2 vs. DMSO	P33908	MAN1A1	Mannosyl-oligosaccharide 1,2-alpha-mannosidase IA	-1.42917	2.32093	12.7386	12.9957	13.133	12.7348	11.497	12.4871	11.3944	10.5069
20uM E2 vs. DMSO	O43347	MSI1	RNA-binding protein Musashi homolog 1	-0.418392	2.31502	15.3562	15.5623	15.2638	15.4184	14.8707	14.8202	15.0875	15.1488
20uM E2 vs. DMSO	Q9Y6H1	CHCHD2	Coiled-coil-helix-coiled-coil-helix domain-containing protein 2	0.610609	2.3111	17.8658	17.5964	17.885	17.9718	18.0725	18.2446	18.6236	18.8206
20uM E2 vs. DMSO	P05783	KRT18	Keratin, type I cytoskeletal 18	0.342973	2.30805	23.8497	23.6055	23.7382	23.5782	23.8484	24.1922	23.9869	24.116
20uM E2 vs. DMSO	Q9BYE7	PCGF6	Polycomb group RING finger protein 6	-1.08752	2.30731	12.5648	11.8259	12.4874	12.627	11.3356	11.6106	11.5178	10.691
20uM E2 vs. DMSO	P40692	MLH1	DNA mismatch repair protein Mlh1	-0.365512	2.30251	16.3741	16.2472	16.1453	16.1103	15.6898	15.7886	15.9313	16.0052
20uM E2 vs. DMSO	Q9P253	VPS18	Vacuolar protein sorting-associated protein 18 homolog	0.388833	2.30112	19.1656	19.075	18.8397	18.8804	19.1403	19.3838	19.4537	19.5382
20uM E2 vs. DMSO	Q7L1V2	MON1B	Vacuolar fusion protein MON1 homolog B	0.414501	2.30024	15.549	15.8023	15.5359	15.7221	15.8026	16.1843	16.1358	16.1446
20uM E2 vs. DMSO	Q5BKU9	OXLD1	Oxidoreductase-like domain-containing protein 1	0.391644	2.2973	13.9125	13.8184	13.878	13.759	14.2578	14.1598	14.3327	14.1841
20uM E2 vs. DMSO	P13807	GYS1	Glycogen [starch] synthase, muscle	0.266535	2.29503	17.2701	17.378	17.4153	17.5212	17.7428	17.7097	17.6051	17.593
20uM E2 vs. DMSO	O96013	PAK4	Serine/threonine-protein kinase PAK 4	0.278897	2.29378	17.5431	17.4207	17.447	17.5005	17.5838	17.7627	17.8936	17.7868
20uM E2 vs. DMSO	Q96JQ2	CLMN	Calmin	0.269079	2.29334	16.8549	16.7612	16.7252	16.6133	16.9317	17.0751	16.9794	17.0446
20uM E2 vs. DMSO	Q5VV42	CDKAL1	Threonylcarbamoyladenosine tRNA methylthiotransferase	-0.414068	2.29313	15.9108	15.728	15.4886	15.7434	15.3757	15.4117	15.2922	15.1348
20uM E2 vs. DMSO	Q13526	PIN1	Peptidyl-prolyl cis-trans isomerase NIMA-interacting 1	0.220784	2.2893	18.2378	18.1495	18.1611	18.2056	18.4791	18.4745	18.2955	18.3879
20uM E2 vs. DMSO	Q9UKI8	TLK1	Serine/threonine-protein kinase tousled-like 1	-0.49303	2.28823	14.1725	14.3342	14.1155	14.1869	13.6209	13.4749	13.8741	13.867
20uM E2 vs. DMSO	Q93096	PTP4A1	Protein tyrosine phosphatase type IVA 1	-2.00244	2.28577	13.8593	13.7928	11.6441	13.3182	11.8518	10.3519	11.5978	10.803
20uM E2 vs. DMSO	O43598	DNPH1	5-hydroxymethyl-dUMP N-hydrolase	0.440938	2.28508	20.747	20.6478	20.3041	20.8522	20.9015	21.0721	21.1268	21.2144
20uM E2 vs. DMSO	P09493	TPM1	Tropomyosin alpha-1 chain	-0.269357	2.28328	19.5505	19.4128	19.2848	19.3767	19.1275	19.2606	19.0313	19.1279
20uM E2 vs. DMSO	Q9HCE1	MOV10	Helicase MOV-10	-0.27242	2.28153	17.1568	17.0974	16.9528	17.2432	16.8019	16.8477	16.8699	16.841
20uM E2 vs. DMSO	Q13426	XRCC4	DNA repair protein XRCC4	-0.636862	2.28137	13.8491	13.8375	13.8776	13.6522	12.7205	13.3772	13.2984	13.2728
20uM E2 vs. DMSO	O75362	ZNF217	Zinc finger protein 217	-0.416689	2.28073	15.1928	14.9228	15.149	14.9747	14.7808	14.4512	14.622	14.7185
20uM E2 vs. DMSO	Q12756	KIF1A	Kinesin-like protein KIF1A	0.258825	2.28068	19.1806	18.9644	18.9328	18.9828	19.1978	19.3132	19.2222	19.3627
20uM E2 vs. DMSO	Q9NXF7	DCAF16	DDB1- and CUL4-associated factor 16	-0.363081	2.2794	15.3717	15.5026	15.3857	15.4483	14.8763	15.0114	15.1787	15.1896
20uM E2 vs. DMSO	Q8WUB8	PHF10	PHD finger protein 10	-0.726042	2.27924	14.2459	14.3467	14.1088	14.3007	13.4148	13.0522	13.6346	13.9965
20uM E2 vs. DMSO	Q9Y2G9	SBNO2	Protein strawberry notch homolog 2	-0.321505	2.27806	16.5335	16.3372	16.2891	16.2781	15.9272	16.0755	15.9976	16.1517
20uM E2 vs. DMSO	O95619	YEATS4	YEATS domain-containing protein 4	-0.489107	2.27566	15.0037	15.1543	15.3324	14.9613	14.3552	14.7046	14.6211	14.8144
20uM E2 vs. DMSO	Q13227	GPS2	G protein pathway suppressor 2	-0.344047	2.27379	15.7599	15.77	15.7362	15.59	15.2191	15.4249	15.3165	15.5195
20uM E2 vs. DMSO	Q9BTX7	TTPAL	Alpha-tocopherol transfer protein-like	-0.343894	2.2713	16.1522	15.8588	15.7932	15.9894	15.6598	15.5883	15.5953	15.5746
20uM E2 vs. DMSO	P46013	MKI67	Proliferation marker protein Ki-67	-0.606499	2.2711	16.4138	16.4691	16.0632	15.9028	15.6883	15.6032	15.2729	15.8584
20uM E2 vs. DMSO	Q9BSV6	TSEN34	tRNA-splicing endonuclease subunit Sen34	-0.267249	2.27055	16.6246	16.5608	16.4903	16.4964	16.3354	16.1887	16.2148	16.3644
20uM E2 vs. DMSO	O00115	DNASE2	Deoxyribonuclease-2-alpha	0.451023	2.27019	18.6845	18.3818	18.509	18.4962	18.7729	18.7893	19.0098	19.3036
20uM E2 vs. DMSO	Q9H6H4	REEP4	Receptor expression-enhancing protein 4	-0.534517	2.26857	13.8819	13.9428	14.0592	13.9842	13.1356	13.4576	13.7001	13.4368
20uM E2 vs. DMSO	Q15599	NHERF2	Na(+)/H(+) exchange regulatory cofactor NHE-RF2	-0.390357	2.26582	16.8046	16.3759	16.3971	16.5999	16.0685	16.1148	16.1901	16.2426
20uM E2 vs. DMSO	Q16186	ADRM1	Proteasomal ubiquitin receptor ADRM1	0.33511	2.26533	18.924	19.0675	18.8324	18.8886	19.1214	19.2317	19.1933	19.5066
20uM E2 vs. DMSO	Q9H7Z7	PTGES2	Prostaglandin E synthase 2	0.27561	2.26164	18.9257	18.9706	19.0461	18.8117	19.1179	19.2004	19.1594	19.3789
20uM E2 vs. DMSO	Q9BVK6	TMED9	Transmembrane emp24 domain-containing protein 9	0.449162	2.26103	16.9212	17.2455	17.3458	17.3659	17.4419	17.6667	17.8736	17.6928
20uM E2 vs. DMSO	P00966	ASS1	Argininosuccinate synthase	0.701309	2.26061	16.5625	16.3571	15.9977	15.5995	16.7046	16.7703	16.8509	16.9963
20uM E2 vs. DMSO	P22059	OSBP	Oxysterol-binding protein 1	0.267545	2.26025	19.5985	19.3802	19.3009	19.4424	19.6455	19.7182	19.6334	19.7951
20uM E2 vs. DMSO	Q86YS6	RAB43	Ras-related protein Rab-43	0.492783	2.25575	13.6282	13.7243	13.9286	13.5947	14.0424	14.3807	14.3234	14.1003
20uM E2 vs. DMSO	Q96RU3	FNBP1	Formin-binding protein 1	-0.294361	2.25453	16.0085	15.901	15.8963	15.9228	15.6568	15.6634	15.4922	15.7387
20uM E2 vs. DMSO	Q7Z6J9	TSEN54	tRNA-splicing endonuclease subunit Sen54	-0.517435	2.25435	14.5545	14.7332	14.8103	14.3989	14.3092	13.9516	13.9331	14.2334
20uM E2 vs. DMSO	Q14108	SCARB2	Lysosome membrane protein 2	0.484745	2.25148	17.5403	17.6546	17.4743	17.4003	17.6931	17.9324	18.0142	18.3689
20uM E2 vs. DMSO	Q6ICG6	KIAA0930	Uncharacterized protein KIAA0930	-0.370885	2.24886	18.4906	18.8746	18.913	18.9752	18.4712	18.4738	18.3918	18.4329
20uM E2 vs. DMSO	Q9NYJ1	COA4	Cytochrome c oxidase assembly factor 4 homolog, mitochondrial	0.541164	2.24633	16.163	15.743	16.0758	15.9689	16.231	16.4113	16.5989	16.8743
20uM E2 vs. DMSO	Q9P086	MED11	Mediator of RNA polymerase II transcription subunit 11	-0.454758	2.24492	13.7938	13.9415	13.9833	14.0252	13.528	13.6107	13.4826	13.3034
20uM E2 vs. DMSO	Q15811	ITSN1	Intersectin-1	0.375142	2.24489	18.1164	17.8932	17.8043	17.9505	18.1486	18.304	18.2419	18.5704
20uM E2 vs. DMSO	Q8ND90	PNMA1	Paraneoplastic antigen Ma1	-0.447632	2.24346	13.5304	13.6467	13.5793	13.5827	13.098	13.1945	13.2324	13.0235
20uM E2 vs. DMSO	Q8NCE2	MTMR14	Myotubularin-related protein 14	-0.424624	2.23865	15.4019	15.8409	15.6154	15.4523	15.0384	15.1549	15.2983	15.1205
20uM E2 vs. DMSO	Q13451	FKBP5	Peptidyl-prolyl cis-trans isomerase FKBP5	2.86974	2.23789	13.6467	12.3181	16.153	16.1198	17.3149	17.4705	17.3491	17.5821
20uM E2 vs. DMSO	P61586	RHOA	Transforming protein RhoA	0.251588	2.23732	19.1047	19.2059	19.0268	19.1823	19.267	19.3395	19.3992	19.5205
20uM E2 vs. DMSO	P04843	RPN1	Dolichyl-diphosphooligosaccharide--protein glycosyltransferase subunit 1	0.408266	2.23725	16.8417	16.9255	16.8125	16.946	17.06	17.2103	17.277	17.6114
20uM E2 vs. DMSO	P61421	ATP6V0D1	V-type proton ATPase subunit d 1	0.257541	2.23461	16.537	16.627	16.5178	16.6113	16.699	16.8236	16.889	16.9117
20uM E2 vs. DMSO	Q5PRF9	SAMD4B	Protein Smaug homolog 2	-0.388594	2.23321	14.7958	14.6932	14.6064	14.7074	14.3283	14.3511	14.4451	14.1239
20uM E2 vs. DMSO	Q6VMQ6	ATF7IP	Activating transcription factor 7-interacting protein 1	-0.519248	2.23075	15.5958	15.6285	15.4857	15.4291	15.1405	14.5967	15.2325	15.0925
20uM E2 vs. DMSO	Q96GM5	SMARCD1	SWI/SNF-related matrix-associated actin-dependent regulator of chromatin subfamily D member 1	-0.744164	2.23025	16.1088	16.0069	15.8236	15.685	15.3807	15.5061	14.5429	15.2179
20uM E2 vs. DMSO	Q7L2J0	MEPCE	7SK snRNA methylphosphate capping enzyme	-0.317945	2.22807	17.1674	17.177	17.3186	17.373	16.8047	16.9669	17.1232	16.8694
20uM E2 vs. DMSO	Q9Y5A7	NUB1	NEDD8 ultimate buster 1	-0.275816	2.22758	16.612	16.4808	16.3406	16.4288	16.2214	16.2062	16.139	16.1924
20uM E2 vs. DMSO	O14818	PSMA7	Proteasome subunit alpha type-7	0.255587	2.22348	21.2302	21.2367	21.0729	21.1004	21.2928	21.444	21.3665	21.5593
20uM E2 vs. DMSO	Q06830	PRDX1	Peroxiredoxin-1	0.284835	2.22249	24.0804	23.9782	23.8334	23.9376	24.1114	24.245	24.2063	24.4062
20uM E2 vs. DMSO	Q06203	PPAT	Amidophosphoribosyltransferase	-0.264576	2.22236	18.5144	18.367	18.2414	18.3393	18.1066	17.9926	18.1081	18.1966
20uM E2 vs. DMSO	O60725	ICMT	Protein-S-isoprenylcysteine O-methyltransferase	-0.865818	2.22236	13.624	13.6141	13.6635	13.5798	12.1694	12.8138	12.6523	13.3828
20uM E2 vs. DMSO	Q86U42	PABPN1	Polyadenylate-binding protein 2	-0.226682	2.21867	20.0531	20.0229	19.8967	19.9203	19.646	19.7467	19.7315	19.862
20uM E2 vs. DMSO	Q9BRX5	GINS3	DNA replication complex GINS protein PSF3	-1.02588	2.21705	16.6098	16.4476	16.5273	16.4145	15.8631	14.5538	16.0504	15.4282
20uM E2 vs. DMSO	O75436	VPS26A	Vacuolar protein sorting-associated protein 26A	0.186961	2.2167	19.4319	19.3158	19.2906	19.3079	19.4765	19.5283	19.51	19.5793
20uM E2 vs. DMSO	P14854	COX6B1	Cytochrome c oxidase subunit 6B1	0.2172	2.21535	19.5313	19.5081	19.3868	19.3906	19.6756	19.6057	19.6269	19.7773
20uM E2 vs. DMSO	Q9BUA3	SPINDOC	Spindlin interactor and repressor of chromatin-binding protein	-0.491532	2.21431	15.4755	15.417	15.0503	15.4669	14.8121	14.6463	14.8846	15.1007
20uM E2 vs. DMSO	P48556	PSMD8	26S proteasome non-ATPase regulatory subunit 8	0.261548	2.21365	19.4207	19.4107	19.3577	19.3699	19.4389	19.7011	19.7259	19.7392
20uM E2 vs. DMSO	O15347	HMGB3	High mobility group protein B3	-0.25607	2.21214	20.0384	20.098	19.9209	20.0508	19.6512	19.7226	19.7741	19.936
20uM E2 vs. DMSO	Q03013	GSTM4	Glutathione S-transferase Mu 4	0.478626	2.21188	14.6052	14.5769	14.2104	14.3412	14.9851	15.067	14.6782	14.9178
20uM E2 vs. DMSO	Q04941	PLP2	Proteolipid protein 2	-0.504007	2.21166	16.5424	16.5529	16.5647	16.4949	15.5997	16.2508	16.249	16.0395
20uM E2 vs. DMSO	O75529	TAF5L	TAF5-like RNA polymerase II p300/CBP-associated factor-associated factor 65 kDa subunit 5L	-0.575932	2.206	14.1401	13.8258	13.9133	14.0124	13.394	13.6374	13.036	13.5204
20uM E2 vs. DMSO	O60220	TIMM8A	Mitochondrial import inner membrane translocase subunit Tim8 A	0.292704	2.20548	16.8095	16.6654	16.9363	16.8442	17.0571	17.0023	17.1302	17.2367
20uM E2 vs. DMSO	Q8IXH7	NELFCD	Negative elongation factor C/D	-0.213835	2.20256	17.7638	17.7958	17.7648	17.6593	17.5067	17.5109	17.6254	17.4853
20uM E2 vs. DMSO	Q9GZN8	ADISSP	Adipose-secreted signaling protein	-0.444444	2.20248	16.5802	16.3834	16.0892	16.4273	15.8444	15.8345	15.8526	16.1708
20uM E2 vs. DMSO	B7ZAP0	RABGAP1L	Rab GTPase-activating protein 1-like, isoform 10	0.860988	2.20054	11.6485	12.3793	11.6814	12.0617	13.0013	12.6335	12.4862	13.0939
20uM E2 vs. DMSO	Q7L0Y3	TRMT10C	tRNA methyltransferase 10 homolog C	0.273947	2.19852	17.9538	17.9761	17.8706	17.8935	18.122	18.1426	18.1174	18.4079
20uM E2 vs. DMSO	O75376	NCOR1	Nuclear receptor corepressor 1	0.47511	2.19646	17.0597	16.8584	17.0048	16.9495	17.2502	17.8656	17.3003	17.3567
20uM E2 vs. DMSO	Q9NQ50	MRPL40	Large ribosomal subunit protein mL40	0.339929	2.19185	16.1525	16.3052	16.122	16.0117	16.5052	16.3535	16.4221	16.6702
20uM E2 vs. DMSO	P40925	MDH1	Malate dehydrogenase, cytoplasmic	0.236711	2.191	21.6633	21.5611	21.5143	21.4544	21.6571	21.8171	21.783	21.8827
20uM E2 vs. DMSO	Q9UBQ0	VPS29	Vacuolar protein sorting-associated protein 29	0.303348	2.18831	18.8656	18.626	18.6895	18.7351	18.844	19.1331	18.9875	19.1649
20uM E2 vs. DMSO	Q96CD0	FBXL8	F-box/LRR-repeat protein 8	0.339481	2.18768	15.0344	14.8574	14.8528	14.9441	15.1918	15.166	15.2667	15.422
20uM E2 vs. DMSO	Q96BR1	SGK3	Serine/threonine-protein kinase Sgk3	-0.318189	2.18665	15.2322	15.2025	15.1487	15.2474	14.8928	14.9697	14.7358	14.9596
20uM E2 vs. DMSO	P41091	EIF2S3	Eukaryotic translation initiation factor 2 subunit 3	0.247851	2.18444	20.1013	19.9406	19.9004	19.9895	20.0892	20.3108	20.2042	20.3191
20uM E2 vs. DMSO	O95613	PCNT	Pericentrin	-0.737385	2.18186	14.0243	14.6106	14.7292	14.1683	13.3017	13.8757	13.5172	13.8885
20uM E2 vs. DMSO	O00746	NME4	Nucleoside diphosphate kinase, mitochondrial	-0.367105	2.18168	16.3193	16.0474	16.2508	15.9114	15.7608	15.716	15.7199	15.8638
20uM E2 vs. DMSO	Q86X29	LSR	Lipolysis-stimulated lipoprotein receptor	-0.469389	2.18064	16.5911	16.2945	16.5656	16.6708	15.7086	16.1812	16.2004	16.1542
20uM E2 vs. DMSO	Q9NQT5	EXOSC3	Exosome complex component RRP40	-0.302192	2.18049	17.45	17.2612	17.3536	17.2978	17.0757	16.8396	17.1827	17.0558
20uM E2 vs. DMSO	Q6IBS0	TWF2	Twinfilin-2	0.272384	2.17846	18.7881	18.5462	18.7164	18.5654	18.8132	18.9302	18.9047	19.0575
20uM E2 vs. DMSO	Q96HE7	ERO1A	ERO1-like protein alpha	0.25898	2.17516	17.9633	17.7642	17.7881	17.8174	18.0096	18.2109	17.9988	18.1496
20uM E2 vs. DMSO	P54105	CLNS1A	Methylosome subunit pICln	-0.582907	2.17439	18.3268	18.1619	17.735	18.6057	17.5663	17.7668	17.5006	17.664
20uM E2 vs. DMSO	Q93100	PHKB	Phosphorylase b kinase regulatory subunit beta	0.317508	2.17232	16.2572	16.1971	16.1711	16.0336	16.3698	16.6416	16.3693	16.5483
20uM E2 vs. DMSO	Q15785	TOMM34	Mitochondrial import receptor subunit TOM34	-0.255322	2.17105	20.1237	20.0457	19.9176	20.0071	19.7583	19.7667	19.6302	19.9176
20uM E2 vs. DMSO	P30405	PPIF	Peptidyl-prolyl cis-trans isomerase F, mitochondrial	0.656779	2.17085	17.7357	18.6912	18.1772	18.0117	18.7816	18.7414	18.6623	19.0575
20uM E2 vs. DMSO	O43805	SSNA1	Microtubule nucleation factor SSNA1	0.403167	2.17002	16.0589	15.9542	15.9271	15.9885	16.0872	16.4739	16.3531	16.6272
20uM E2 vs. DMSO	Q08AG7	MZT1	Mitotic-spindle organizing protein 1	-0.277988	2.16946	16.09	16.0835	16.0731	15.9664	15.9058	15.6793	15.7239	15.792
20uM E2 vs. DMSO	Q9H1E3	NUCKS1	Nuclear ubiquitous casein and cyclin-dependent kinase substrate 1	0.278862	2.16819	18.9447	18.8697	19.0249	18.8775	19.0968	19.0695	19.3505	19.3154
20uM E2 vs. DMSO	Q9NUL7	DDX28	Probable ATP-dependent RNA helicase DDX28	1.00757	2.16755	13.7836	13.3163	12.6215	12.648	13.797	14.3183	13.8808	14.4036
20uM E2 vs. DMSO	Q8IZQ5	SELENOH	Selenoprotein H	-0.328139	2.16717	17.4204	17.293	17.1726	17.2744	16.8035	16.8976	16.9713	17.1755
20uM E2 vs. DMSO	Q96S99	PLEKHF1	Pleckstrin homology domain-containing family F member 1	0.254338	2.16683	18.8308	18.8633	18.653	18.6558	18.9129	19.0457	18.9576	19.1041
20uM E2 vs. DMSO	P49366	DHPS	Deoxyhypusine synthase	0.300874	2.16624	16.7568	16.5662	16.5423	16.6476	16.8365	16.8831	16.8794	17.1173
20uM E2 vs. DMSO	Q15393	SF3B3	Splicing factor 3B subunit 3	-0.185622	2.16572	19.8228	19.6883	19.7631	19.6442	19.5724	19.5283	19.5381	19.5371
20uM E2 vs. DMSO	P25789	PSMA4	Proteasome subunit alpha type-4	0.30958	2.16467	21.4734	21.2151	21.1728	21.2463	21.4829	21.4984	21.5891	21.7754
20uM E2 vs. DMSO	Q96HR8	NAF1	H/ACA ribonucleoprotein complex non-core subunit NAF1	-0.750576	2.16452	13.9847	14.0715	14.2665	14.0671	13.7028	13.7251	13.0875	12.8721
20uM E2 vs. DMSO	P23381	WARS1	Tryptophan--tRNA ligase, cytoplasmic	0.195952	2.16316	18.6543	18.559	18.5136	18.5816	18.7199	18.7532	18.756	18.8631
20uM E2 vs. DMSO	Q9UDY2	TJP2	Tight junction protein ZO-2	0.197746	2.16172	17.8544	17.8463	17.8589	17.8601	17.9573	18.1195	18.0211	18.1128
20uM E2 vs. DMSO	P09455	RBP1	Retinol-binding protein 1	-0.26137	2.16055	16.1738	16.106	15.9852	16.052	15.7584	15.7832	15.8645	15.8655
20uM E2 vs. DMSO	Q9H7N4	SCAF1	Splicing factor, arginine/serine-rich 19	-0.372083	2.15775	14.833	14.6198	14.7152	14.7567	14.5374	14.2754	14.2686	14.355
20uM E2 vs. DMSO	O75369	FLNB	Filamin-B	0.21279	2.15677	20.096	20.0369	20.098	20.063	20.2562	20.3939	20.1507	20.3443
20uM E2 vs. DMSO	P07686	HEXB	Beta-hexosaminidase subunit beta	0.302548	2.1556	18.7302	18.692	18.5341	18.5437	18.7575	18.9158	18.9125	19.1244
20uM E2 vs. DMSO	Q96FQ6	S100A16	Protein S100-A16	-0.224947	2.15546	19.4188	19.392	19.5188	19.4507	19.0856	19.2936	19.187	19.3144
20uM E2 vs. DMSO	Q14849	STARD3	StAR-related lipid transfer protein 3	0.254657	2.15353	17.1453	17.1728	17.0382	17.0402	17.2162	17.3774	17.4709	17.3508
20uM E2 vs. DMSO	O00462	MANBA	Beta-mannosidase	0.317269	2.15343	16.4493	16.305	16.1232	16.2942	16.4613	16.6552	16.6193	16.705
20uM E2 vs. DMSO	Q9HCU8	POLD4	DNA polymerase delta subunit 4	-0.363119	2.15228	16.1913	16.5434	16.2314	16.2646	15.9103	15.8032	15.9584	16.1063
20uM E2 vs. DMSO	Q96FZ2	HMCES	Abasic site processing protein HMCES	-0.634055	2.15004	17.8825	18.4175	18.3862	18.6116	17.7595	17.6702	18.0137	17.3182
20uM E2 vs. DMSO	Q6V1P9	DCHS2	Protocadherin-23	0.295617	2.14813	17.1169	17.1934	17.0144	16.9633	17.4808	17.1852	17.4133	17.3911
20uM E2 vs. DMSO	Q9BSJ8	ESYT1	Extended synaptotagmin-1	-0.256115	2.14759	20.4188	20.3907	20.1558	20.2932	19.9781	20.1858	20.0221	20.0481
20uM E2 vs. DMSO	Q96ER3	SAAL1	Protein SAAL1	-0.331446	2.14609	16.1954	16.4642	16.4905	16.4799	16.2162	15.9542	16.0931	16.0407
20uM E2 vs. DMSO	Q9UHR4	BAIAP2L1	Brain-specific angiogenesis inhibitor 1-associated protein 2-like protein 1	0.532812	2.14465	15.9045	16.1938	16.5409	16.4578	16.6896	16.6697	16.7935	17.0755
20uM E2 vs. DMSO	O75864	PPP1R37	Protein phosphatase 1 regulatory subunit 37	0.399213	2.14171	15.2672	15.7978	15.5382	15.4723	15.9724	15.9576	15.8392	15.9031
20uM E2 vs. DMSO	P05787	KRT8	Keratin, type II cytoskeletal 8	0.245127	2.13974	26.0204	25.9925	25.8581	25.8604	26.0678	26.1708	26.1933	26.2801
20uM E2 vs. DMSO	Q15345	LRRC41	Leucine-rich repeat-containing protein 41	0.356749	2.13874	15.1876	15.5267	15.3276	15.5284	15.7959	15.7608	15.8139	15.6266
20uM E2 vs. DMSO	Q9BZJ0	CRNKL1	Crooked neck-like protein 1	-0.318415	2.13475	17.6147	17.412	17.2705	17.3619	17.0775	17.1842	16.942	17.1818
20uM E2 vs. DMSO	Q13464	ROCK1	Rho-associated protein kinase 1	-0.189393	2.13452	18.698	18.7647	18.6947	18.6632	18.4637	18.5488	18.4551	18.5955
20uM E2 vs. DMSO	O00194	RAB27B	Ras-related protein Rab-27B	-0.30666	2.13427	18.113	18.1967	18.016	18.0204	17.5733	17.7836	17.7987	17.9639
20uM E2 vs. DMSO	Q9BVM2	DPCD	Protein DPCD	0.307766	2.13317	16.046	15.9152	15.9296	15.8995	16.1015	16.2161	16.2634	16.4404
20uM E2 vs. DMSO	Q12904	AIMP1	Aminoacyl tRNA synthase complex-interacting multifunctional protein 1	0.259367	2.13305	20.0121	19.8042	19.8525	19.7847	20.0316	20.089	20.0838	20.2866
20uM E2 vs. DMSO	Q9P2R7	SUCLA2	Succinate--CoA ligase [ADP-forming] subunit beta, mitochondrial	0.277373	2.13298	18.6624	18.537	18.4518	18.4405	18.7177	18.7378	18.7576	18.9879
20uM E2 vs. DMSO	P35914	HMGCL	Hydroxymethylglutaryl-CoA lyase, mitochondrial	0.25149	2.13139	17.3651	17.3606	17.4093	17.2506	17.6161	17.5505	17.4829	17.742
20uM E2 vs. DMSO	P31947	SFN	14-3-3 protein sigma	0.390027	2.13067	18.5815	18.3125	18.2295	18.3726	18.5423	18.9508	18.6475	18.9156
20uM E2 vs. DMSO	P46937	YAP1	Transcriptional coactivator YAP1	-0.290057	2.13023	17.1027	17.136	17.2227	17.2154	16.7388	16.878	16.8177	17.082
20uM E2 vs. DMSO	Q9NYP9	MIS18A	Protein Mis18-alpha	-2.27725	2.12959	13.1673	14.2007	14.2579	14.5425	11.8664	10.5685	13.7481	10.8764
20uM E2 vs. DMSO	Q96P47	AGAP3	Arf-GAP with GTPase, ANK repeat and PH domain-containing protein 3	0.33262	2.12787	16.9534	17.1472	16.808	17.1437	17.1867	17.4111	17.3649	17.4201
20uM E2 vs. DMSO	Q9Y5X2	SNX8	Sorting nexin-8	0.32025	2.12771	16.1254	15.8915	16.0319	16.1917	16.2857	16.4754	16.2828	16.4776
20uM E2 vs. DMSO	P16949	STMN1	Stathmin	-0.304786	2.12469	21.8541	21.6675	21.6096	21.6865	21.412	21.3189	21.2512	21.6164
20uM E2 vs. DMSO	Q0PNE2	ELP6	Elongator complex protein 6	1.07242	2.12397	14.9502	15.2894	16.5194	15.0882	16.376	16.715	16.4606	16.5852
20uM E2 vs. DMSO	Q8WW22	DNAJA4	DnaJ homolog subfamily A member 4	-0.298044	2.12327	16.127	16.0606	16.0512	16.0733	15.595	15.761	15.8484	15.9155
20uM E2 vs. DMSO	Q9NR45	NANS	Sialic acid synthase	0.186959	2.12163	20.6012	20.5369	20.4963	20.5309	20.6854	20.6958	20.6864	20.8455
20uM E2 vs. DMSO	O95486	SEC24A	Protein transport protein Sec24A	0.297597	2.12021	17.7582	17.7199	17.4474	17.7361	17.9192	18.0391	17.8484	18.0452
20uM E2 vs. DMSO	P30281	CCND3	G1/S-specific cyclin-D3	0.717791	2.12004	11.5439	12.0634	11.7663	11.9703	12.6425	12.3418	12.4056	12.8252
20uM E2 vs. DMSO	P51149	RAB7A	Ras-related protein Rab-7a	0.324126	2.11857	19.9667	19.9454	19.7751	19.936	19.9932	20.2589	20.2223	20.4454
20uM E2 vs. DMSO	P33993	MCM7	DNA replication licensing factor MCM7	-0.221884	2.11762	20.3659	20.4127	20.3306	20.278	19.9898	20.114	20.1425	20.2534
20uM E2 vs. DMSO	P04259	KRT6B	Keratin, type II cytoskeletal 6B	0.345479	2.11394	24.4674	24.4499	24.397	24.286	24.4749	24.7558	24.791	24.9605
20uM E2 vs. DMSO	Q96RN5	MED15	Mediator of RNA polymerase II transcription subunit 15	-0.273307	2.11344	16.9561	16.6748	16.8526	16.797	16.4791	16.6206	16.4872	16.6004
20uM E2 vs. DMSO	P78344	EIF4G2	Eukaryotic translation initiation factor 4 gamma 2	-0.179938	2.11162	19.7526	19.7173	19.6266	19.6353	19.4594	19.5681	19.5169	19.4677
20uM E2 vs. DMSO	Q9NNW5	WDR6	tRNA (34-2'-O)-methyltransferase regulator WDR6	0.316012	2.11008	15.3226	15.3531	15.166	15.3277	15.4397	15.6116	15.6821	15.7
20uM E2 vs. DMSO	Q9NRR4	DROSHA	Ribonuclease 3	-0.630783	2.10968	13.444	13.3113	12.8605	13.3998	12.4051	12.7632	12.7377	12.5865
20uM E2 vs. DMSO	Q6XQN6	NAPRT	Nicotinate phosphoribosyltransferase	0.302467	2.10959	20.3727	20.2547	20.2512	20.1491	20.3375	20.6734	20.5267	20.7001
20uM E2 vs. DMSO	P62256	UBE2H	Ubiquitin-conjugating enzyme E2 H	0.249519	2.1088	17.6403	17.4801	17.5206	17.4683	17.677	17.857	17.6934	17.8798
20uM E2 vs. DMSO	Q13011	ECH1	Delta(3,5)-Delta(2,4)-dienoyl-CoA isomerase, mitochondrial	0.35201	2.10787	20.2199	20.1933	20.0422	19.9586	20.3383	20.371	20.371	20.7418
20uM E2 vs. DMSO	P0C7P0	CISD3	CDGSH iron-sulfur domain-containing protein 3, mitochondrial	0.325419	2.10695	17.4947	17.7043	17.8198	17.5156	17.9553	18.0827	17.7909	18.0071
20uM E2 vs. DMSO	Q9UNZ2	NSFL1C	NSFL1 cofactor p47	0.264865	2.10664	19.5635	19.4951	19.536	19.4894	19.6391	19.8374	19.6868	19.9802
20uM E2 vs. DMSO	P11498	PC	Pyruvate carboxylase, mitochondrial	0.299014	2.1064	16.9713	17.0536	17.1584	17.1164	17.2837	17.3839	17.2454	17.5827
20uM E2 vs. DMSO	O00214	LGALS8	Galectin-8	-0.473739	2.10442	15.9132	15.6109	16.0362	15.8006	15.1092	15.6669	15.3422	15.3477
20uM E2 vs. DMSO	Q9BPW8	NIPSNAP1	Protein NipSnap homolog 1	0.270113	2.10427	19.9001	19.7677	19.7386	19.6022	19.9496	19.9603	19.9961	20.1829
20uM E2 vs. DMSO	P35790	CHKA	Choline kinase alpha	0.272576	2.10062	16.4722	16.5051	16.3702	16.5794	16.5948	16.8137	16.7877	16.821
20uM E2 vs. DMSO	Q15013	MAD2L1BP	MAD2L1-binding protein	-1.2547	2.09803	14.4096	14.2348	14.1377	14.4229	13.4131	13.8137	13.0862	11.8731
20uM E2 vs. DMSO	O94832	MYO1D	Unconventional myosin-Id	-0.286178	2.09784	17.3383	17.4519	17.6439	17.5492	17.1756	17.0949	17.2478	17.3203
20uM E2 vs. DMSO	Q8IX03	WWC1	Protein KIBRA	0.464481	2.09694	15.2652	14.9271	14.7472	15.0479	15.3654	15.481	15.3038	15.6953
20uM E2 vs. DMSO	Q6L8Q7	PDE12	2',5'-phosphodiesterase 12	0.199112	2.09599	17.8481	17.9044	17.8243	17.8236	17.9734	18.0551	18.0144	18.1539
20uM E2 vs. DMSO	O96017	CHEK2	Serine/threonine-protein kinase Chk2	-0.46336	2.09171	16.2629	16.1573	16.327	16.171	15.7601	15.948	15.3718	15.9849
20uM E2 vs. DMSO	Q08AM6	VAC14	Protein VAC14 homolog	0.264875	2.09093	16.5083	16.5602	16.4163	16.3162	16.6298	16.8114	16.7085	16.7109
20uM E2 vs. DMSO	O43242	PSMD3	26S proteasome non-ATPase regulatory subunit 3	0.249652	2.09066	19.9041	19.8397	19.739	19.7856	19.9228	19.9909	20.174	20.1793
20uM E2 vs. DMSO	P10599	TXN	Thioredoxin	0.312709	2.08824	22.4216	22.2022	22.0446	22.2755	22.4	22.6152	22.5008	22.6788
20uM E2 vs. DMSO	Q6ZRV2	FAM83H	Protein FAM83H	-0.220356	2.08793	18.6102	18.4407	18.4178	18.4616	18.1967	18.2614	18.2246	18.3662
20uM E2 vs. DMSO	Q9BX68	HINT2	Adenosine 5'-monophosphoramidase HINT2	0.39008	2.08555	17.5632	17.2864	17.36	17.1057	17.643	17.6005	17.6697	17.9625
20uM E2 vs. DMSO	P46100	ATRX	Transcriptional regulator ATRX	-0.380926	2.08407	15.6474	15.7442	15.4266	15.526	15.0047	15.3757	15.1631	15.2771
20uM E2 vs. DMSO	Q96LJ7	DHRS1	Dehydrogenase/reductase SDR family member 1	0.542689	2.08387	16.0769	16.0387	15.4209	15.7659	16.4385	16.5858	16.1474	16.3016
20uM E2 vs. DMSO	Q9P2K8	EIF2AK4	eIF-2-alpha kinase GCN2	-0.327599	2.08271	15.6993	15.5268	15.4204	15.5525	15.2405	15.2057	15.0863	15.3562
20uM E2 vs. DMSO	P40818	USP8	Ubiquitin carboxyl-terminal hydrolase 8	0.340705	2.08251	16.7246	16.5447	16.365	16.5186	16.756	16.8933	16.7965	17.0701
20uM E2 vs. DMSO	Q02252	ALDH6A1	Methylmalonate-semialdehyde/malonate-semialdehyde dehydrogenase [acylating], mitochondrial	0.365564	2.08169	18.8008	18.7129	18.6238	18.4985	18.9816	18.8435	18.9613	19.312
20uM E2 vs. DMSO	Q8NDA8	MROH1	Maestro heat-like repeat-containing protein family member 1	0.238178	2.07835	16.2721	16.192	16.1436	16.2668	16.406	16.4311	16.4264	16.5637
20uM E2 vs. DMSO	P35659	DEK	Protein DEK	-0.35931	2.07833	18.273	18.0799	18.0005	18.0105	17.9897	17.5659	17.6056	17.7654
20uM E2 vs. DMSO	P21283	ATP6V1C1	V-type proton ATPase subunit C 1	0.206195	2.0758	18.4428	18.5331	18.3979	18.4102	18.5289	18.6786	18.7044	18.6969
20uM E2 vs. DMSO	P78527	PRKDC	DNA-dependent protein kinase catalytic subunit	-0.199705	2.06899	20.3895	20.2424	20.194	20.1478	20.0243	20.0539	20.0418	20.0549
20uM E2 vs. DMSO	Q8TEH3	DENND1A	DENN domain-containing protein 1A	-0.869848	2.06839	14.7722	14.8934	14.7279	14.3232	13.0815	14.2738	13.7805	14.1015
20uM E2 vs. DMSO	Q8TER5	ARHGEF40	Rho guanine nucleotide exchange factor 40	-0.704144	2.0682	12.6337	13.1627	12.8738	13.2154	12.02	12.1784	12.2536	12.617
20uM E2 vs. DMSO	Q12907	LMAN2	Vesicular integral-membrane protein VIP36	0.334826	2.06783	18.3823	18.1965	18.115	18.2264	18.3365	18.5078	18.6601	18.7551
20uM E2 vs. DMSO	P10276	RARA	Retinoic acid receptor alpha	-1.43758	2.06752	13.9361	12.8887	13.0436	11.9389	11.6396	11.981	10.8178	11.6187
20uM E2 vs. DMSO	Q8IV63	VRK3	Inactive serine/threonine-protein kinase VRK3	-0.814435	2.06338	13.4812	13.4681	12.6881	13.6136	12.577	12.1257	12.6033	12.6874
20uM E2 vs. DMSO	P38606	ATP6V1A	V-type proton ATPase catalytic subunit A	0.299505	2.06331	19.2742	19.1498	18.985	19.0743	19.2761	19.3819	19.4008	19.6225
20uM E2 vs. DMSO	Q9Y5U9	IER3IP1	Immediate early response 3-interacting protein 1	1.32039	2.06189	13.0872	13.8561	13.4726	13.9862	14.2815	15.4407	14.1542	15.8073
20uM E2 vs. DMSO	Q9Y696	CLIC4	Chloride intracellular channel protein 4	-0.258079	2.05893	18.774	18.5915	18.6498	18.6683	18.2603	18.3753	18.4374	18.5783
20uM E2 vs. DMSO	Q5MNZ6	WDR45B	WD repeat domain phosphoinositide-interacting protein 3	-0.264068	2.05852	15.7192	15.7835	15.8612	15.7742	15.6445	15.4724	15.4745	15.4904
20uM E2 vs. DMSO	Q96L92	SNX27	Sorting nexin-27	0.415659	2.0578	17.5586	17.1943	17.0427	17.1829	17.4278	17.6654	17.7647	17.7833
20uM E2 vs. DMSO	Q86YV5	PRAG1	Inactive tyrosine-protein kinase PRAG1	-0.462692	2.0576	13.4213	13.5097	13.3965	13.4965	12.8552	13.1254	12.8609	13.1317
20uM E2 vs. DMSO	P54819	AK2	Adenylate kinase 2, mitochondrial	0.289744	2.05734	19.8928	19.6842	19.6575	19.6117	19.901	19.9762	19.9282	20.1998
20uM E2 vs. DMSO	Q9Y3E0	GOLT1B	Vesicle transport protein GOT1B	0.407351	2.05722	13.6212	13.8731	13.6951	13.9264	14.169	14.2153	14.2961	14.0647
20uM E2 vs. DMSO	Q8NC54	KCT2	Keratinocyte-associated transmembrane protein 2	0.836053	2.05585	12.7659	13.65	12.6677	13.539	13.797	14.2006	13.8969	14.0724
20uM E2 vs. DMSO	P30711	GSTT1	Glutathione S-transferase theta-1	0.231718	2.05488	17.6582	17.5994	17.4961	17.5089	17.6591	17.8638	17.8299	17.8367
20uM E2 vs. DMSO	Q15777	MPPED2	Metallophosphoesterase MPPED2	-0.560221	2.05387	15.0167	14.6257	14.5079	14.5146	13.9588	13.9583	14.0388	14.4682
20uM E2 vs. DMSO	Q9HA82	CERS4	Ceramide synthase 4	0.521862	2.05381	12.8866	13.1743	13.1237	12.8903	13.4647	13.3252	13.5918	13.7806
20uM E2 vs. DMSO	Q13315	ATM	Serine-protein kinase ATM	-0.396424	2.05342	16.5627	16.3977	16.4046	16.6092	16.2548	15.8236	16.301	16.0091
20uM E2 vs. DMSO	O15357	INPPL1	Phosphatidylinositol 3,4,5-trisphosphate 5-phosphatase 2	-0.250521	2.05321	18.2479	18.1889	18.179	18.089	17.7549	17.9392	17.9465	18.0621
20uM E2 vs. DMSO	Q9Y653	ADGRG1	Adhesion G-protein coupled receptor G1	-1.14802	2.05138	12.3916	11.8129	12.4076	12.742	11.0729	11.0016	10.6613	12.0264
20uM E2 vs. DMSO	O60508	CDC40	Pre-mRNA-processing factor 17	-0.487914	2.05093	15.1977	14.8565	14.8725	15.0612	14.5838	14.2391	14.8062	14.4072
20uM E2 vs. DMSO	Q10567	AP1B1	AP-1 complex subunit beta-1	0.263582	2.049	19.4068	19.414	19.4035	19.3665	19.4245	19.7826	19.7007	19.7373
20uM E2 vs. DMSO	P30291	WEE1	Wee1-like protein kinase	-1.21975	2.04887	13.9059	14.0527	13.8733	13.4142	11.5718	12.9003	13.4237	12.4714
20uM E2 vs. DMSO	P62310	LSM3	U6 snRNA-associated Sm-like protein LSm3	-0.206605	2.04827	20.4189	20.237	20.2448	20.164	20.0447	20.0427	20.037	20.114
20uM E2 vs. DMSO	Q9Y608	LRRFIP2	Leucine-rich repeat flightless-interacting protein 2	0.390361	2.03981	17.9699	17.7796	17.9876	17.7373	17.9569	18.3925	18.2193	18.4672
20uM E2 vs. DMSO	Q9H6F5	CCDC86	Coiled-coil domain-containing protein 86	0.313112	2.03916	16.4388	16.2652	16.2874	16.2537	16.473	16.7972	16.7199	16.5075
20uM E2 vs. DMSO	Q6ZNJ1	NBEAL2	Neurobeachin-like protein 2	0.598344	2.03792	15.9295	15.5555	16.3464	16.0656	16.2241	16.623	16.6469	16.7964
20uM E2 vs. DMSO	P27707	DCK	Deoxycytidine kinase	-0.254513	2.03676	17.1406	16.9896	16.9065	16.9417	16.6551	16.6897	16.7776	16.838
20uM E2 vs. DMSO	Q8TBF2	PRXL2B	Prostamide/prostaglandin F synthase	-0.397806	2.03574	16.6597	16.562	16.7447	16.5867	15.9632	16.4746	16.1207	16.4033
20uM E2 vs. DMSO	Q9BUR4	WRAP53	Telomerase Cajal body protein 1	-1.16697	2.03132	13.4917	13.5528	13.7209	13.6974	11.8996	13.3536	11.6957	12.846
20uM E2 vs. DMSO	Q8WTS6	SETD7	Histone-lysine N-methyltransferase SETD7	0.196636	2.02906	17.465	17.433	17.3087	17.4431	17.6045	17.5738	17.5885	17.6694
20uM E2 vs. DMSO	O60229	KALRN	Kalirin	0.805835	2.0269	15.3288	15.2733	14.8979	15.5801	16.3261	16.1935	15.3556	16.4283
20uM E2 vs. DMSO	P05109	S100A8	Protein S100-A8	2.89572	2.02518	12.8158	11.051	15.2125	10.7432	14.7218	15.4191	15.6674	15.5971
20uM E2 vs. DMSO	P54252	ATXN3	Ataxin-3	0.688711	2.02321	16.543	16.3514	16.519	16.4359	16.6541	17.4855	16.8371	17.6274
20uM E2 vs. DMSO	O76062	TM7SF2	Delta(14)-sterol reductase TM7SF2	0.511737	2.02052	15.5113	15.78	15.405	15.6901	15.7411	16.0209	16.2463	16.425
20uM E2 vs. DMSO	Q15007	WTAP	Pre-mRNA-splicing regulator WTAP	-0.195879	2.02024	17.6488	17.4932	17.503	17.5459	17.3161	17.3957	17.324	17.3715
20uM E2 vs. DMSO	Q13131	PRKAA1	5'-AMP-activated protein kinase catalytic subunit alpha-1	0.236536	2.01816	17.1918	17.0299	17.0671	16.9776	17.2078	17.324	17.2792	17.4014
20uM E2 vs. DMSO	Q9UJX4	ANAPC5	Anaphase-promoting complex subunit 5	-0.265539	2.01758	15.6143	15.4671	15.4794	15.6106	15.2972	15.2117	15.2626	15.3377
20uM E2 vs. DMSO	O00268	TAF4	Transcription initiation factor TFIID subunit 4	-0.39887	2.01691	14.1483	13.9221	13.9082	13.9238	13.593	13.6996	13.4566	13.5577
20uM E2 vs. DMSO	P14314	PRKCSH	Glucosidase 2 subunit beta	0.265304	2.0126	20.876	20.6584	20.6065	20.7387	20.8676	21.0449	20.9	21.1283
20uM E2 vs. DMSO	Q9NP97	DYNLRB1	Dynein light chain roadblock-type 1	0.212422	2.01163	20.6526	20.5331	20.5419	20.6561	20.7598	20.6902	20.8613	20.9221
20uM E2 vs. DMSO	P07195	LDHB	L-lactate dehydrogenase B chain	-0.183401	2.01093	19.3176	19.2327	19.147	19.1811	18.994	19.0009	19.0483	19.1017
20uM E2 vs. DMSO	Q9H0H0	INTS2	Integrator complex subunit 2	-0.258943	2.01055	15.7276	15.6984	15.8444	15.849	15.46	15.5678	15.469	15.5867
20uM E2 vs. DMSO	Q5U3C3	TMEM164	Transmembrane protein 164	0.965178	2.01027	11.9563	12.8019	13.0961	13.4354	13.8935	13.919	13.6024	13.7356
20uM E2 vs. DMSO	Q92973	TNPO1	Transportin-1	-0.15227	2.00944	19.233	19.1777	19.1624	19.175	19.009	19.0583	18.9976	19.0741
20uM E2 vs. DMSO	Q16555	DPYSL2	Dihydropyrimidinase-related protein 2	0.323044	2.00916	16.1702	16.1113	15.894	16.0539	16.214	16.3539	16.383	16.5707
20uM E2 vs. DMSO	P41240	CSK	Tyrosine-protein kinase CSK	0.220082	2.00854	18.4743	18.3019	18.384	18.3315	18.4765	18.71	18.5763	18.6092
20uM E2 vs. DMSO	Q96MW1	CCDC43	Coiled-coil domain-containing protein 43	0.353575	2.00684	17.4662	17.0827	17.2707	17.2442	17.4558	17.5559	17.6113	17.8551
20uM E2 vs. DMSO	P26583	HMGB2	High mobility group protein B2	-0.231926	2.00179	21.0134	20.8351	20.752	20.8033	20.5323	20.6976	20.5594	20.6867
20uM E2 vs. DMSO	Q16822	PCK2	Phosphoenolpyruvate carboxykinase [GTP], mitochondrial	0.245251	2.001	19.6938	19.6503	19.6841	19.5773	19.8721	19.8685	19.752	20.094
20uM E2 vs. DMSO	O15013	ARHGEF10	Rho guanine nucleotide exchange factor 10	-0.53481	2.00024	12.9425	13.107	13.0393	13.0309	12.3933	12.7675	12.5341	12.2855
20uM E2 vs. DMSO	P11279	LAMP1	Lysosome-associated membrane glycoprotein 1	0.369785	2.00007	18.6758	18.6357	18.4462	18.4806	18.7762	18.7509	18.9498	19.2406
20uM E2 vs. DMSO	Q9H8H0	NOL11	Nucleolar protein 11	-0.353252	1.99933	15.1184	14.8357	14.9641	14.9041	14.4542	14.6062	14.5885	14.7604
20uM E2 vs. DMSO	Q5VZK9	CARMIL1	F-actin-uncapping protein LRRC16A	-0.291794	1.99658	17.1725	17.1138	17.2076	17.1298	16.8488	16.7583	16.7407	17.1086
20uM E2 vs. DMSO	O95210	STBD1	Starch-binding domain-containing protein 1	0.198227	1.99495	17.3592	17.3294	17.3266	17.3852	17.4442	17.5224	17.6036	17.6232
20uM E2 vs. DMSO	Q14318	FKBP8	Peptidyl-prolyl cis-trans isomerase FKBP8	0.294586	1.99305	15.873	15.7199	15.7024	15.8058	15.9536	16.2173	16.1508	15.9577
20uM E2 vs. DMSO	O60888	CUTA	Protein CutA	0.252279	1.99257	17.7799	17.6912	17.5883	17.6289	17.8641	17.9655	17.793	18.0747
20uM E2 vs. DMSO	Q9Y6N5	SQOR	Sulfide:quinone oxidoreductase, mitochondrial	0.280696	1.99095	16.9297	16.937	17.2271	17.0633	17.3326	17.2515	17.2487	17.4471
20uM E2 vs. DMSO	Q8NC60	NOA1	Nitric oxide-associated protein 1	-0.459578	1.98769	15.4674	15.4911	15.2287	15.3907	14.754	15.2606	14.6863	15.0387
20uM E2 vs. DMSO	P55957	BID	BH3-interacting domain death agonist	-0.232467	1.98712	17.6674	17.5293	17.5005	17.5495	17.2699	17.4733	17.2467	17.3269
20uM E2 vs. DMSO	Q70EL1	USP54	Inactive ubiquitin carboxyl-terminal hydrolase 54	-0.282003	1.98688	15.9999	15.8892	15.7614	15.8746	15.5885	15.5015	15.5737	15.7335
20uM E2 vs. DMSO	Q8NHP8	PLBD2	Putative phospholipase B-like 2	0.205601	1.98634	18.5622	18.4605	18.3934	18.4256	18.5805	18.6439	18.6601	18.7797
20uM E2 vs. DMSO	Q5T280	SPOUT1	Putative methyltransferase C9orf114	-0.279679	1.98527	15.6246	15.5816	15.5485	15.7835	15.3111	15.422	15.4059	15.2805
20uM E2 vs. DMSO	O43324	EEF1E1	Eukaryotic translation elongation factor 1 epsilon-1	0.216706	1.98425	19.6601	19.5529	19.534	19.5711	19.7258	19.7102	19.7875	19.9615
20uM E2 vs. DMSO	Q12929	EPS8	Epidermal growth factor receptor kinase substrate 8	-0.347486	1.98368	16.0707	16.1306	15.7317	16.0378	15.6053	15.7928	15.6323	15.5504
20uM E2 vs. DMSO	P23258	TUBG1	Tubulin gamma-1 chain	-0.190705	1.98292	18.4179	18.4071	18.4381	18.4588	18.201	18.2208	18.1666	18.3706
20uM E2 vs. DMSO	Q96M27	PRRC1	Protein PRRC1	0.313235	1.98185	17.0752	17.0471	17.1801	17.0826	17.1929	17.3073	17.5604	17.5775
20uM E2 vs. DMSO	P12259	F5	Coagulation factor V	-0.54983	1.97952	13.8963	13.9212	13.597	13.4137	13.1129	12.9194	13.2726	13.324
20uM E2 vs. DMSO	P37802	TAGLN2	Transgelin-2	-0.23231	1.97877	21.6033	21.4525	21.5066	21.5014	21.1715	21.2852	21.2122	21.4655
20uM E2 vs. DMSO	P05165	PCCA	Propionyl-CoA carboxylase alpha chain, mitochondrial	0.267576	1.9779	17.6389	17.4518	17.4122	17.3707	17.6867	17.7352	17.6324	17.8896
20uM E2 vs. DMSO	Q8NCC3	PLA2G15	Phospholipase A2 group XV	0.297327	1.97724	16.2706	16.2655	16.016	16.1111	16.3452	16.4735	16.4138	16.62
20uM E2 vs. DMSO	Q53ET0	CRTC2	CREB-regulated transcription coactivator 2	0.428549	1.97643	14.9017	14.6984	14.6313	14.7596	14.8274	15.298	15.2907	15.289
20uM E2 vs. DMSO	Q7Z6J0	SH3RF1	E3 ubiquitin-protein ligase SH3RF1	-0.973027	1.9763	12.5799	11.9789	12.3831	12.3938	10.9988	10.8408	11.9494	11.6545
20uM E2 vs. DMSO	Q5VIR6	VPS53	Vacuolar protein sorting-associated protein 53 homolog	0.288616	1.97532	17.2049	17.2733	17.2664	17.3936	17.3706	17.6082	17.5526	17.7613
20uM E2 vs. DMSO	O43670	ZNF207	BUB3-interacting and GLEBS motif-containing protein ZNF207	-0.201783	1.97469	19.4355	19.4763	19.2336	19.3598	19.1573	19.1907	19.1336	19.2166
20uM E2 vs. DMSO	Q8IXK0	PHC2	Polyhomeotic-like protein 2	-0.208057	1.97248	16.7296	16.7028	16.6873	16.6492	16.4593	16.42	16.4741	16.5833
20uM E2 vs. DMSO	Q9BS40	LXN	Latexin	-0.261276	1.97147	17.9186	17.8592	17.7714	17.8621	17.4373	17.5652	17.574	17.7896
20uM E2 vs. DMSO	Q7Z5J1	HSD11B1L	Hydroxysteroid 11-beta-dehydrogenase 1-like protein	-0.368701	1.97077	18.0483	17.635	17.9187	17.7769	17.5536	17.3498	17.6864	17.3142
20uM E2 vs. DMSO	P61020	RAB5B	Ras-related protein Rab-5B	0.48802	1.97055	16.5804	16.7566	16.4397	16.6161	16.6242	17.26	17.1504	17.3104
20uM E2 vs. DMSO	Q9Y666	SLC12A7	Solute carrier family 12 member 7	-0.410656	1.96958	14.8478	14.9546	14.7902	14.8497	14.4805	14.6263	14.128	14.565
20uM E2 vs. DMSO	P56192	MARS1	Methionine--tRNA ligase, cytoplasmic	0.185539	1.96904	19.5629	19.3922	19.4044	19.3785	19.5833	19.6666	19.5775	19.6529
20uM E2 vs. DMSO	P61981	YWHAG	14-3-3 protein gamma	0.253538	1.9679	21.7142	21.6275	21.4453	21.4321	21.6982	21.91	21.7966	21.8285
20uM E2 vs. DMSO	P06454	PTMA	Prothymosin alpha	-0.258948	1.96689	23.8445	23.7462	23.4981	23.5487	23.3819	23.3762	23.4288	23.4148
20uM E2 vs. DMSO	Q96HP0	DOCK6	Dedicator of cytokinesis protein 6	0.287418	1.96686	15.3287	15.2002	15.3889	15.2827	15.5615	15.4508	15.6289	15.709
20uM E2 vs. DMSO	Q9UBF2	COPG2	Coatomer subunit gamma-2	0.175937	1.96358	19.4196	19.3623	19.4494	19.4221	19.488	19.6742	19.6245	19.5704
20uM E2 vs. DMSO	P63172	DYNLT1	Dynein light chain Tctex-type 1	0.236078	1.96279	18.0253	18.1236	17.8908	17.9938	18.1171	18.3639	18.2557	18.2411
20uM E2 vs. DMSO	Q5ZPR3	CD276	CD276 antigen	-0.374713	1.96256	16.6928	16.527	16.4001	16.3874	16.3948	15.9237	16.1218	16.0681
20uM E2 vs. DMSO	Q15036	SNX17	Sorting nexin-17	0.304799	1.96201	16.8967	16.6463	16.8121	16.7463	16.914	17.0606	17.0519	17.294
20uM E2 vs. DMSO	P61011	SRP54	Signal recognition particle subunit SRP54	0.295701	1.96103	18.235	18.1402	18.0839	18.1845	18.189	18.5521	18.4914	18.594
20uM E2 vs. DMSO	O95147	DUSP14	Dual specificity protein phosphatase 14	-0.455966	1.96006	15.6743	15.4672	15.4316	15.235	15.1772	14.9427	15.1752	14.6891
20uM E2 vs. DMSO	O00299	CLIC1	Chloride intracellular channel protein 1	0.201013	1.95802	22.3883	22.1996	22.2972	22.2409	22.3976	22.5578	22.4261	22.5487
20uM E2 vs. DMSO	Q9BXB5	OSBPL10	Oxysterol-binding protein-related protein 10	-0.282845	1.95681	16.264	16.1228	16.1172	16.0064	15.794	15.8181	16.0027	15.7642
20uM E2 vs. DMSO	Q9UI26	IPO11	Importin-11	-0.26033	1.95601	16.269	16.1198	16.1111	16.2265	15.7854	16.0303	15.9345	15.935
20uM E2 vs. DMSO	Q8N680	ZBTB2	Zinc finger and BTB domain-containing protein 2	-0.593128	1.95515	13.7997	13.8188	13.8393	13.9384	13.3738	13.2031	13.6467	12.8001
20uM E2 vs. DMSO	O95999	BCL10	B-cell lymphoma/leukemia 10	0.28536	1.95505	15.8585	15.6013	15.5505	15.5902	15.8718	15.9721	15.9639	15.9341
20uM E2 vs. DMSO	Q15014	MORF4L2	Mortality factor 4-like protein 2	-0.270896	1.95408	16.104	16.2572	16.0862	16.0503	15.9546	15.8829	15.8681	15.7084
20uM E2 vs. DMSO	Q9UL25	RAB21	Ras-related protein Rab-21	0.266989	1.95407	17.487	17.478	17.2418	17.3464	17.5159	17.7251	17.6115	17.7685
20uM E2 vs. DMSO	P30047	GCHFR	GTP cyclohydrolase 1 feedback regulatory protein	0.407146	1.95254	15.9634	15.8492	16.1246	16.1433	16.5766	16.4595	16.5835	16.0894
20uM E2 vs. DMSO	O75330	HMMR	Hyaluronan mediated motility receptor	-1.11552	1.95229	12.2058	12.2159	12.1612	12.1225	11.6072	10.6171	11.7098	10.3092
20uM E2 vs. DMSO	Q9Y266	NUDC	Nuclear migration protein nudC	0.268709	1.95058	19.7727	19.6522	19.6688	19.6637	19.7778	20.1236	19.8526	20.0783
20uM E2 vs. DMSO	Q9Y3S2	ZNF330	Zinc finger protein 330	0.4074	1.95024	16.2975	16.1876	15.9679	15.9051	16.4152	16.4301	16.3487	16.7937
20uM E2 vs. DMSO	Q9NWQ9	C14orf119	Uncharacterized protein C14orf119	0.251708	1.94852	16.8779	16.8677	16.9602	16.8391	17.218	17.0778	16.9823	17.2738
20uM E2 vs. DMSO	Q15084	PDIA6	Protein disulfide-isomerase A6	0.20874	1.9442	20.1312	20.0161	19.936	19.9247	20.2154	20.2227	20.1037	20.3011
20uM E2 vs. DMSO	P35270	SPR	Sepiapterin reductase	0.201132	1.94304	18.0715	17.9131	17.9377	18.0091	18.1206	18.1317	18.1945	18.2891
20uM E2 vs. DMSO	Q9HCY8	S100A14	Protein S100-A14	-0.444175	1.93963	17.0713	17.3481	16.9692	17.3018	16.5436	16.5328	16.7645	17.0728
20uM E2 vs. DMSO	Q68E01	INTS3	Integrator complex subunit 3	-0.18392	1.93776	17.5167	17.5603	17.6103	17.5833	17.3761	17.3227	17.4723	17.3637
20uM E2 vs. DMSO	Q99873	PRMT1	Protein arginine N-methyltransferase 1	-0.181175	1.9376	20.8469	20.7253	20.6499	20.705	20.4891	20.5624	20.5327	20.6182
20uM E2 vs. DMSO	Q9UBL3	ASH2L	Set1/Ash2 histone methyltransferase complex subunit ASH2	-0.27232	1.93569	16.643	16.6385	16.4802	16.3576	16.2038	16.3122	16.1958	16.3182
20uM E2 vs. DMSO	P06865	HEXA	Beta-hexosaminidase subunit alpha	0.303401	1.93291	19.0507	19.0265	18.8577	18.9769	19.2057	19.1068	19.2658	19.5472
20uM E2 vs. DMSO	Q96Q05	TRAPPC9	Trafficking protein particle complex subunit 9	0.223847	1.93246	16.4297	16.5076	16.4437	16.4726	16.5684	16.6692	16.7059	16.8054
20uM E2 vs. DMSO	Q6ZUM4	ARHGAP27	Rho GTPase-activating protein 27	0.450177	1.92759	15.6297	15.3453	15.026	15.2746	15.5403	15.831	15.7596	15.9454
20uM E2 vs. DMSO	Q96QK1	VPS35	Vacuolar protein sorting-associated protein 35	0.222609	1.92684	20.539	20.4301	20.3658	20.3646	20.4838	20.7012	20.6623	20.7428
20uM E2 vs. DMSO	Q14956	GPNMB	Transmembrane glycoprotein NMB	0.291617	1.92681	16.4008	16.2981	16.2365	16.3866	16.4973	16.5758	16.5637	16.8516
20uM E2 vs. DMSO	Q07960	ARHGAP1	Rho GTPase-activating protein 1	-0.167625	1.92563	19.6853	19.5552	19.587	19.6803	19.4054	19.5139	19.4347	19.4832
20uM E2 vs. DMSO	O43795	MYO1B	Unconventional myosin-Ib	-0.222188	1.92517	17.7792	17.7426	17.6793	17.7779	17.4016	17.506	17.504	17.6786
20uM E2 vs. DMSO	P36507	MAP2K2	Dual specificity mitogen-activated protein kinase kinase 2	0.273127	1.92345	18.1822	18.1039	18.1776	18.3745	18.2817	18.5586	18.5768	18.5136
20uM E2 vs. DMSO	Q96PZ0	PUS7	Pseudouridylate synthase 7 homolog	-0.259069	1.91965	18.602	18.4989	18.4254	18.4679	18.1071	18.1852	18.213	18.4526
20uM E2 vs. DMSO	P34949	MPI	Mannose-6-phosphate isomerase	0.224345	1.91752	17.1652	17.2881	17.2505	17.2503	17.5399	17.5662	17.4198	17.3256
20uM E2 vs. DMSO	Q96JJ3	ELMO2	Engulfment and cell motility protein 2	0.447825	1.91439	13.0728	12.988	12.7711	12.8811	13.2051	13.3989	13.4187	13.4817
20uM E2 vs. DMSO	Q9Y547	IFT25	Intraflagellar transport protein 25 homolog	-0.288077	1.91292	17.1021	16.7611	16.8648	16.926	16.6924	16.5947	16.4892	16.7254
20uM E2 vs. DMSO	Q03701	CEBPZ	CCAAT/enhancer-binding protein zeta	0.417485	1.91271	15.1818	15.1714	15.1926	15.4567	15.6798	15.5168	15.4784	15.9974
20uM E2 vs. DMSO	P49257	LMAN1	Protein ERGIC-53	0.302249	1.91029	17.6713	17.5128	17.353	17.6037	17.6349	17.8216	17.9535	17.9398
20uM E2 vs. DMSO	Q5JS37	NHLRC3	NHL repeat-containing protein 3	0.428363	1.90666	14.4785	14.6421	14.5918	14.7563	15.0887	14.7805	14.9577	15.3553
20uM E2 vs. DMSO	Q5JTJ3	COA6	Cytochrome c oxidase assembly factor 6 homolog	0.370995	1.90646	17.0289	16.6774	16.6397	16.5894	17.0336	17.0285	17.0144	17.3427
20uM E2 vs. DMSO	Q2M389	WASHC4	WASH complex subunit 4	0.2466	1.90555	16.6275	16.5377	16.782	16.7308	16.8032	17.0096	16.932	16.9196
20uM E2 vs. DMSO	Q14571	ITPR2	Inositol 1,4,5-trisphosphate receptor type 2	0.625297	1.90477	13.1552	13.7941	13.8247	13.3277	13.9904	14.2975	14.413	13.902
20uM E2 vs. DMSO	Q8WWV3	RTN4IP1	Reticulon-4-interacting protein 1, mitochondrial	0.266393	1.90434	16.1955	16.1781	16.1783	16.0877	16.4593	16.247	16.4128	16.5859
20uM E2 vs. DMSO	O60941	DTNB	Dystrobrevin beta	-0.392239	1.90383	15.7206	15.6302	15.5546	15.6486	14.9734	15.1336	15.3543	15.5238
20uM E2 vs. DMSO	P58546	MTPN	Myotrophin	0.159325	1.9038	19.7058	19.6097	19.5686	19.5609	19.7428	19.766	19.7552	19.8183
20uM E2 vs. DMSO	Q8N5M1	ATPAF2	ATP synthase mitochondrial F1 complex assembly factor 2	0.205883	1.90352	17.0075	16.9052	16.9251	16.8729	17.2111	17.0731	17.0594	17.1907
20uM E2 vs. DMSO	Q9NX18	SDHAF2	Succinate dehydrogenase assembly factor 2, mitochondrial	0.326322	1.90314	17.7411	17.6747	17.7073	17.777	17.9768	17.9736	17.8794	18.3755
20uM E2 vs. DMSO	Q9H3K6	BOLA2	BolA-like protein 2	0.257157	1.90182	19.0921	19.0193	18.8798	18.9873	19.0788	19.2651	19.2283	19.435
20uM E2 vs. DMSO	Q9BXK5	BCL2L13	Bcl-2-like protein 13	0.279047	1.90061	17.2037	17.1393	17.3315	17.1591	17.3147	17.4053	17.6623	17.5675
20uM E2 vs. DMSO	Q96KG9	SCYL1	N-terminal kinase-like protein	0.236105	1.9003	18.087	18.0648	17.9587	17.8234	18.1314	18.1692	18.2799	18.2977
20uM E2 vs. DMSO	Q9UQR0	SCML2	Sex comb on midleg-like protein 2	-0.621315	1.89978	15.998	16.7663	16.3483	16.622	16.1554	15.6693	15.4631	15.9615
20uM E2 vs. DMSO	Q9Y3C0	WASHC3	WASH complex subunit 3	0.220946	1.89865	16.5125	16.4842	16.403	16.3688	16.5566	16.7124	16.6509	16.7323
20uM E2 vs. DMSO	Q96HC4	PDLIM5	PDZ and LIM domain protein 5	-0.296617	1.89609	18.198	17.865	17.9025	17.9403	17.5375	17.6756	17.6525	17.8538
20uM E2 vs. DMSO	Q8IW45	NAXD	ATP-dependent (S)-NAD(P)H-hydrate dehydratase	0.44226	1.89586	16.6767	16.6106	16.2323	16.2753	16.5928	16.8969	16.9625	17.1117
20uM E2 vs. DMSO	Q8N9T8	KRI1	Protein KRI1 homolog	0.450327	1.89401	15.9858	15.9831	15.9135	15.885	15.9996	16.6276	16.2814	16.66
20uM E2 vs. DMSO	P68363	TUBA1B	Tubulin alpha-1B chain	-0.28941	1.89186	24.4889	24.6066	24.739	24.8268	24.5696	24.299	24.3288	24.3064
20uM E2 vs. DMSO	Q9P0R6	GSKIP	GSK3B-interacting protein	0.263311	1.89179	16.8471	16.8659	16.7759	16.8072	16.9295	17.0308	17.0931	17.296
20uM E2 vs. DMSO	Q96BP2	CHCHD1	Small ribosomal subunit protein mS37	0.28466	1.891	16.7241	16.533	16.6486	16.5648	16.7201	16.8469	16.9581	17.0841
20uM E2 vs. DMSO	Q8NI36	WDR36	WD repeat-containing protein 36	0.575461	1.88811	14.3293	13.8047	14.3676	14.0642	14.5618	14.5651	14.5833	15.1574
20uM E2 vs. DMSO	Q16222	UAP1	UDP-N-acetylhexosamine pyrophosphorylase	0.251621	1.88712	17.9469	17.8535	17.8496	17.9609	17.9596	18.1741	18.1589	18.3247
20uM E2 vs. DMSO	Q00341	HDLBP	Vigilin	0.166631	1.88561	18.5198	18.4477	18.3986	18.4208	18.5947	18.602	18.5657	18.6911
20uM E2 vs. DMSO	P51114	FXR1	RNA-binding protein FXR1	0.334509	1.884	19.0069	18.9183	18.5446	18.7067	19.185	18.9544	19.2075	19.1676
20uM E2 vs. DMSO	P52435	POLR2J	DNA-directed RNA polymerase II subunit RPB11-a	-0.402822	1.88381	15.0389	14.7299	14.7956	14.5537	14.4165	14.1905	14.483	14.4168
20uM E2 vs. DMSO	O00443	PIK3C2A	Phosphatidylinositol 4-phosphate 3-kinase C2 domain-containing subunit alpha	0.780024	1.88108	17.0537	17.0262	15.9016	16.9853	17.5571	17.7633	17.2857	17.481
20uM E2 vs. DMSO	Q9UMX0	UBQLN1	Ubiquilin-1	0.170768	1.88057	17.6435	17.5644	17.5964	17.6185	17.812	17.7026	17.7583	17.833
20uM E2 vs. DMSO	P07814	EPRS1	Bifunctional glutamate/proline--tRNA ligase	0.294314	1.88007	19.7432	20.1723	20.0078	19.9355	20.1074	20.2814	20.2834	20.3638
20uM E2 vs. DMSO	Q8N8N7	PTGR2	Prostaglandin reductase 2	0.302079	1.87809	18.595	18.385	18.3724	18.2799	18.5699	18.6573	18.6669	18.9466
20uM E2 vs. DMSO	O15156	ZBTB7B	Zinc finger and BTB domain-containing protein 7B	0.636191	1.87603	15.2712	14.9579	14.795	15.1174	15.9754	15.6985	15.941	15.0713
20uM E2 vs. DMSO	Q8N8A6	DDX51	ATP-dependent RNA helicase DDX51	-0.279646	1.87513	15.6577	15.6256	15.6931	15.6596	15.5411	15.3848	15.3937	15.1979
20uM E2 vs. DMSO	Q9Y5J9	TIMM8B	Mitochondrial import inner membrane translocase subunit Tim8 B	0.206653	1.86867	16.6565	16.6211	16.6276	16.4583	16.7649	16.8087	16.8249	16.7916
20uM E2 vs. DMSO	Q8N3X1	FNBP4	Formin-binding protein 4	-0.241921	1.86866	15.9453	15.9421	15.9345	15.8035	15.6681	15.6005	15.6092	15.7799
20uM E2 vs. DMSO	A6NHR9	SMCHD1	Structural maintenance of chromosomes flexible hinge domain-containing protein 1	-0.250622	1.86856	17.0123	16.8961	16.7469	16.7687	16.4914	16.6227	16.6435	16.664
20uM E2 vs. DMSO	P26440	IVD	Isovaleryl-CoA dehydrogenase, mitochondrial	0.347398	1.86817	19.3243	19.1459	19.0494	18.946	19.3183	19.4038	19.381	19.752
20uM E2 vs. DMSO	O60218	AKR1B10	Aldo-keto reductase family 1 member B10	0.549864	1.86712	17.7523	17.146	17.6692	17.2248	17.597	18.1477	18.022	18.225
20uM E2 vs. DMSO	Q96HQ2	CDKN2AIPNL	CDKN2AIP N-terminal-like protein	-0.25502	1.86378	16.8	17.019	16.7749	16.7605	16.5627	16.4775	16.6018	16.6923
20uM E2 vs. DMSO	P48200	IREB2	Iron-responsive element-binding protein 2	0.920151	1.86276	16.9659	16.0742	15.9625	17.3949	17.6086	17.5155	17.3051	17.6489
20uM E2 vs. DMSO	Q15370	ELOB	Elongin-B	0.256708	1.86199	19.394	19.2466	19.1612	19.1735	19.3231	19.5944	19.4576	19.6271
20uM E2 vs. DMSO	Q9BVM4	GGACT	Gamma-glutamylaminecyclotransferase	0.311035	1.86089	14.8654	15.0975	15.2046	15.179	15.5003	15.3351	15.3991	15.3561
20uM E2 vs. DMSO	A6ZKI3	RTL8C	Retrotransposon Gag-like protein 8C	-0.479868	1.85787	15.2197	15.0551	14.7043	14.9005	14.2303	14.3667	14.606	14.757
20uM E2 vs. DMSO	P50995	ANXA11	Annexin A11	-0.237737	1.85771	20.108	19.9405	19.9864	19.9029	19.9011	19.5767	19.7633	19.7457
20uM E2 vs. DMSO	Q9Y3Q3	TMED3	Transmembrane emp24 domain-containing protein 3	0.355558	1.85693	14.8473	15.2176	15.0515	15.3391	15.4061	15.5402	15.4612	15.4702
20uM E2 vs. DMSO	Q9Y385	UBE2J1	Ubiquitin-conjugating enzyme E2 J1	0.304246	1.85434	15.6674	15.6902	15.5641	15.4467	15.6935	15.9695	16.0171	15.9052
20uM E2 vs. DMSO	P04792	HSPB1	Heat shock protein beta-1	0.256732	1.85326	24.1457	24.0256	24.0858	23.9929	24.2687	24.4338	24.1159	24.4585
20uM E2 vs. DMSO	Q9Y2I8	WDR37	WD repeat-containing protein 37	0.269484	1.8523	14.8327	14.8381	14.8532	14.9212	15.2026	15.1869	14.9894	15.1441
20uM E2 vs. DMSO	O95721	SNAP29	Synaptosomal-associated protein 29	0.339301	1.84996	16.2363	16.1254	16.2035	16.2256	16.2328	16.5249	16.6375	16.7528
20uM E2 vs. DMSO	O15258	RER1	Protein RER1	0.594573	1.84939	13.9917	14.878	14.6077	14.6927	15.0405	15.0597	15.4231	15.0251
20uM E2 vs. DMSO	Q6NV74	CRACDL	CRACD-like protein	-0.520158	1.84855	13.9464	13.7765	13.7214	13.5442	13.0238	13.524	12.9869	13.3732
20uM E2 vs. DMSO	Q96E11	MRRF	Ribosome-recycling factor, mitochondrial	0.267233	1.84544	18.2618	18.047	17.9366	18.0485	18.3023	18.2892	18.2527	18.5187
20uM E2 vs. DMSO	P30876	POLR2B	DNA-directed RNA polymerase II subunit RPB2	0.394285	1.84507	18.8225	18.2672	18.3518	18.6461	18.972	18.7045	18.9776	19.0109
20uM E2 vs. DMSO	Q69YH5	CDCA2	Cell division cycle-associated protein 2	-1.41225	1.84162	13.88	13.775	14.014	13.9018	10.8835	12.9919	13.2218	12.8246
20uM E2 vs. DMSO	P58107	EPPK1	Epiplakin	0.214773	1.8412	18.492	18.5853	18.5675	18.5092	18.6199	18.9012	18.68	18.812
20uM E2 vs. DMSO	Q9NZT2	OGFR	Opioid growth factor receptor	-0.240374	1.84041	16.8624	16.6922	16.7529	16.8484	16.5228	16.6871	16.4198	16.5647
20uM E2 vs. DMSO	P36543	ATP6V1E1	V-type proton ATPase subunit E 1	0.182979	1.83972	18.8478	18.7288	18.7757	18.7784	18.912	18.9182	18.9312	19.1012
20uM E2 vs. DMSO	P49770	EIF2B2	Translation initiation factor eIF2B subunit beta	0.188626	1.83566	17.1153	17.2229	17.1652	17.0678	17.2761	17.3034	17.3378	17.4085
20uM E2 vs. DMSO	Q8TD06	AGR3	Anterior gradient protein 3	0.234147	1.83482	20.6037	20.3943	20.3934	20.3275	20.6911	20.6123	20.5537	20.7985
20uM E2 vs. DMSO	O43809	NUDT21	Cleavage and polyadenylation specificity factor subunit 5	-0.162958	1.834	19.4982	19.5537	19.4288	19.4668	19.344	19.2362	19.3235	19.3919
20uM E2 vs. DMSO	P53597	SUCLG1	Succinate--CoA ligase [ADP/GDP-forming] subunit alpha, mitochondrial	0.252746	1.83288	19.4147	19.4573	19.4244	19.2307	19.5681	19.545	19.5775	19.8475
20uM E2 vs. DMSO	P30260	CDC27	Cell division cycle protein 27 homolog	0.330076	1.83114	16.1656	16.1049	15.9956	16.3033	16.2058	16.5407	16.5332	16.61
20uM E2 vs. DMSO	Q9NYL9	TMOD3	Tropomodulin-3	0.25276	1.831	18.5322	18.4334	18.2851	18.3566	18.4934	18.673	18.6298	18.822
20uM E2 vs. DMSO	P00491	PNP	Purine nucleoside phosphorylase	-0.172061	1.83035	20.233	20.0968	20.1404	20.1758	20.0299	19.9592	19.8945	20.0741
20uM E2 vs. DMSO	P41250	GARS1	Glycine--tRNA ligase	0.271498	1.83024	20.1992	20.199	20.096	20.1196	20.2905	20.2903	20.4327	20.6862
20uM E2 vs. DMSO	O43156	TTI1	TELO2-interacting protein 1 homolog	-0.249838	1.8296	15.5689	15.5132	15.4208	15.5354	15.3007	15.2946	15.3089	15.1347
20uM E2 vs. DMSO	Q14739	LBR	Delta(14)-sterol reductase LBR	0.408045	1.82797	17.5936	17.1404	17.2082	17.0175	17.4732	17.8854	17.6475	17.5858
20uM E2 vs. DMSO	Q8IWJ2	GCC2	GRIP and coiled-coil domain-containing protein 2	-0.406239	1.82693	18.8997	18.9504	18.8222	19.4538	18.6695	18.7212	18.4627	18.6477
20uM E2 vs. DMSO	Q8TC12	RDH11	Retinol dehydrogenase 11	0.412134	1.82598	15.8229	16.0034	15.5506	15.8239	15.9842	16.0595	16.3497	16.4561
20uM E2 vs. DMSO	Q8WV07	LTO1	Protein LTO1 homolog	-0.45448	1.82578	14.5586	14.7636	14.6409	14.5351	14.4123	14.1435	14.332	13.7925
20uM E2 vs. DMSO	Q709C8	VPS13C	Intermembrane lipid transfer protein VPS13C	0.332798	1.825	16.9933	16.9171	16.6185	16.6061	17.0201	17.1462	17.0254	17.2744
20uM E2 vs. DMSO	Q9BR76	CORO1B	Coronin-1B	0.190287	1.82354	21.8361	21.6272	21.6231	21.6458	21.8194	21.8607	21.8542	21.959
20uM E2 vs. DMSO	Q8WZ82	OVCA2	Esterase OVCA2	0.186158	1.82156	17.7248	17.6254	17.5692	17.5796	17.758	17.8341	17.7602	17.8913
20uM E2 vs. DMSO	O95625	ZBTB11	Zinc finger and BTB domain-containing protein 11	-1.48338	1.82128	14.3752	14.297	14.4839	13.7766	12.5003	13.8328	13.3673	11.2988
20uM E2 vs. DMSO	O60294	LCMT2	tRNA wybutosine-synthesizing protein 4	-0.269386	1.81959	15.393	15.3261	15.3218	15.5483	15.1793	15.0267	15.1268	15.1789
20uM E2 vs. DMSO	O76075	DFFB	DNA fragmentation factor subunit beta	-0.373537	1.81949	14.242	14.1302	13.958	14.0799	13.5737	13.6825	13.7662	13.8936
20uM E2 vs. DMSO	Q9Y2Z9	COQ6	Ubiquinone biosynthesis monooxygenase COQ6, mitochondrial	-0.323358	1.81867	16.5693	16.5365	16.4138	16.533	16.0853	16.0774	16.0961	16.5003
20uM E2 vs. DMSO	Q9H5N1	RABEP2	Rab GTPase-binding effector protein 2	0.442735	1.81653	17.1028	16.9217	17.5298	17.4777	17.4693	17.7164	17.7876	17.8296
20uM E2 vs. DMSO	Q9P0P0	RNF181	E3 ubiquitin-protein ligase RNF181	0.316326	1.81652	15.655	15.4787	15.3701	15.5039	15.8093	16.038	15.6644	15.7614
20uM E2 vs. DMSO	P08134	RHOC	Rho-related GTP-binding protein RhoC	0.226412	1.81376	20.6721	20.5025	20.5379	20.5724	20.6137	20.8648	20.7815	20.9305
20uM E2 vs. DMSO	O95425	SVIL	Supervillin	-0.439096	1.81315	15.8056	15.5725	15.7268	15.5356	14.7994	15.3717	15.313	15.4
20uM E2 vs. DMSO	Q5VWN6	TASOR2	Protein TASOR 2	-0.814235	1.81058	13.6944	12.9008	12.5351	13.0055	11.8763	12.1179	12.5095	12.3751
20uM E2 vs. DMSO	P32322	PYCR1	Pyrroline-5-carboxylate reductase 1, mitochondrial	0.240071	1.81031	18.5865	18.5113	18.7394	18.6955	18.9207	18.7561	18.7867	19.0295
20uM E2 vs. DMSO	Q5VYS8	TUT7	Terminal uridylyltransferase 7	0.256838	1.80912	14.5506	14.5368	14.4885	14.5384	14.7512	14.7399	14.8155	14.835
20uM E2 vs. DMSO	Q9HAN9	NMNAT1	Nicotinamide/nicotinic acid mononucleotide adenylyltransferase 1	0.329868	1.80905	15.1741	15.3475	15.1899	15.6163	15.6219	15.6492	15.6743	15.7019
20uM E2 vs. DMSO	Q8IUD2	ERC1	ELKS/Rab6-interacting/CAST family member 1	-0.40085	1.80899	16.8622	16.492	16.5942	16.7207	16.0635	16.5889	16.3226	16.0906
20uM E2 vs. DMSO	P52566	ARHGDIB	Rho GDP-dissociation inhibitor 2	-0.197375	1.8088	18.0518	18.0563	18.1664	18.0569	17.8649	17.7896	17.8622	18.0251
20uM E2 vs. DMSO	Q96EB6	SIRT1	NAD-dependent protein deacetylase sirtuin-1	-0.420839	1.80859	15.2419	15.1424	15.0742	15.1644	14.7666	14.863	14.9679	14.342
20uM E2 vs. DMSO	Q9UJU6	DBNL	Drebrin-like protein	0.211572	1.80757	19.0129	18.9476	18.8514	18.9108	19.05	19.1592	19.0549	19.3048
20uM E2 vs. DMSO	Q96PE3	INPP4A	Inositol polyphosphate-4-phosphatase type I A	-0.279935	1.80729	14.8807	14.868	14.967	14.7242	14.5435	14.6338	14.5398	14.603
20uM E2 vs. DMSO	P11388	TOP2A	DNA topoisomerase 2-alpha	-0.230504	1.80669	18.6057	18.3066	18.3057	18.3829	18.1955	18.2298	18.1472	18.1064
20uM E2 vs. DMSO	Q8WXG9	ADGRV1	Adhesion G-protein coupled receptor V1	-0.247544	1.80516	16.3569	16.28	16.2423	16.1141	16.0603	15.9862	16.0784	15.8781
20uM E2 vs. DMSO	Q5T160	RARS2	Probable arginine--tRNA ligase, mitochondrial	-0.350192	1.80161	17.3428	17.3033	16.9858	17.2027	16.8128	16.6064	17.0655	16.949
20uM E2 vs. DMSO	Q8N4J0	CARNMT1	Carnosine N-methyltransferase	-0.522271	1.79934	14.2264	14.0671	13.8433	13.9499	13.5817	13.8354	13.4647	13.1158
20uM E2 vs. DMSO	O95994	AGR2	Anterior gradient protein 2 homolog	0.289142	1.79869	21.2446	21.1219	21.2075	20.9855	21.25	21.5306	21.306	21.6295
20uM E2 vs. DMSO	P49848	TAF6	Transcription initiation factor TFIID subunit 6	-0.257618	1.79707	15.2558	15.1068	15.3162	15.1355	14.9719	14.9629	14.9047	14.9444
20uM E2 vs. DMSO	Q9H7S9	ZNF703	Zinc finger protein 703	-1.04158	1.79621	12.1113	12.559	12.5147	12.943	11.4877	10.5955	11.7293	12.1491
20uM E2 vs. DMSO	Q01518	CAP1	Adenylyl cyclase-associated protein 1	0.185018	1.79611	20.5508	20.4001	20.4235	20.4223	20.5434	20.6793	20.5709	20.7432
20uM E2 vs. DMSO	P31150	GDI1	Rab GDP dissociation inhibitor alpha	0.213531	1.79471	19.0598	18.8757	18.7697	18.8008	19.0477	19.0784	19.0672	19.1668
20uM E2 vs. DMSO	Q9NQ86	TRIM36	E3 ubiquitin-protein ligase TRIM36	0.342139	1.79445	15.1392	14.9042	14.9056	14.7468	15.079	15.2724	15.3144	15.3985
20uM E2 vs. DMSO	P16401	H1-5	Histone H1.5	0.420804	1.79432	20.9051	20.8793	20.4946	20.5026	21.2615	21.1238	20.7805	21.2991
20uM E2 vs. DMSO	Q01658	DR1	Protein Dr1	-0.214217	1.79411	18.2317	17.9928	17.9902	18.076	17.9431	17.8852	17.8256	17.78
20uM E2 vs. DMSO	Q9ULW0	TPX2	Targeting protein for Xklp2	1.83533	1.79222	16.1078	16.0352	16.0468	15.9635	18.4841	18.6632	18.6951	15.6523
20uM E2 vs. DMSO	Q96ES7	SGF29	SAGA-associated factor 29	-0.394385	1.79212	15.4003	15.2341	14.9682	15.2863	14.6144	14.7507	14.8934	15.0528
20uM E2 vs. DMSO	P31040	SDHA	Succinate dehydrogenase [ubiquinone] flavoprotein subunit, mitochondrial	0.324542	1.79087	19.1765	19.0547	19.0675	18.8754	19.1981	19.363	19.2462	19.665
20uM E2 vs. DMSO	P35754	GLRX	Glutaredoxin-1	1.93576	1.79007	12.8827	12.5217	15.1922	15.4898	15.548	16.1286	15.9581	16.1947
20uM E2 vs. DMSO	Q13868	EXOSC2	Exosome complex component RRP4	-0.199335	1.78981	17.7786	17.6535	17.5991	17.5803	17.3764	17.431	17.4673	17.5395
20uM E2 vs. DMSO	P53801	PTTG1IP	Pituitary tumor-transforming gene 1 protein-interacting protein	0.572826	1.7893	14.069	14.3498	14.3989	14.3392	14.7064	14.9512	14.434	15.3566
20uM E2 vs. DMSO	O75396	SEC22B	Vesicle-trafficking protein SEC22b	0.198359	1.78777	18.5668	18.5992	18.5607	18.5569	18.6123	18.7357	18.8839	18.8452
20uM E2 vs. DMSO	Q12830	BPTF	Nucleosome-remodeling factor subunit BPTF	-0.306163	1.78746	16.3875	16.2118	16.0753	16.2534	15.7507	15.9622	15.8729	16.1176
20uM E2 vs. DMSO	P20618	PSMB1	Proteasome subunit beta type-1	0.238191	1.78712	20.9253	20.9595	20.7496	20.8165	20.9523	21.0485	21.122	21.2808
20uM E2 vs. DMSO	Q9Y2B0	CNPY2	Protein canopy homolog 2	0.206472	1.78667	19.1846	19.0969	18.9658	19.051	19.3136	19.3227	19.1342	19.3537
20uM E2 vs. DMSO	Q9UKW4	VAV3	Guanine nucleotide exchange factor VAV3	-1.8644	1.78652	13.3439	13.1355	13.1955	13.632	12.2426	13.126	10.2966	10.1843
20uM E2 vs. DMSO	O43823	AKAP8	A-kinase anchor protein 8	-0.301056	1.78569	16.8761	16.9027	16.6935	16.5621	16.5073	16.5659	16.2727	16.4843
20uM E2 vs. DMSO	Q86UY8	NT5DC3	5'-nucleotidase domain-containing protein 3	0.413808	1.78566	14.4288	14.6012	14.2412	14.3837	14.8022	14.741	14.6198	15.147
20uM E2 vs. DMSO	Q5T1M5	FKBP15	FK506-binding protein 15	0.277901	1.78475	16.5489	16.2245	16.4594	16.4456	16.5388	16.6923	16.7381	16.8207
20uM E2 vs. DMSO	O75385	ULK1	Serine/threonine-protein kinase ULK1	0.547781	1.78277	14.7187	14.6647	14.7048	14.8069	15.0721	15.0052	15.8699	15.139
20uM E2 vs. DMSO	Q06210	GFPT1	Glutamine--fructose-6-phosphate aminotransferase [isomerizing] 1	0.18332	1.78132	19.064	19.0412	18.9957	18.9823	19.0509	19.2801	19.2521	19.2334
20uM E2 vs. DMSO	Q96T21	SECISBP2	Selenocysteine insertion sequence-binding protein 2	0.855575	1.77994	14.1047	14.1737	14.8651	14.6223	14.9322	15.8877	15.6598	14.7084
20uM E2 vs. DMSO	O75694	NUP155	Nuclear pore complex protein Nup155	-0.199638	1.77903	17.556	17.4167	17.3096	17.3942	17.167	17.2103	17.2374	17.2634
20uM E2 vs. DMSO	Q92585	MAML1	Mastermind-like protein 1	-0.712345	1.77814	13.8691	13.0391	14.041	14.072	13.2214	13.141	12.863	12.9464
20uM E2 vs. DMSO	Q9Y4C1	KDM3A	Lysine-specific demethylase 3A	-0.571043	1.77761	15.6421	15.7402	15.7229	15.4477	15.2621	14.7939	15.5521	14.6605
20uM E2 vs. DMSO	Q12933	TRAF2	TNF receptor-associated factor 2	-0.212159	1.77716	17.8008	17.5663	17.6697	17.6987	17.3442	17.5257	17.5033	17.5135
20uM E2 vs. DMSO	P57721	PCBP3	Poly(rC)-binding protein 3	-0.173687	1.77705	19.6046	19.4958	19.5085	19.5568	19.2894	19.4922	19.3697	19.3196
20uM E2 vs. DMSO	P01036	CST4	Cystatin-S	1.63739	1.77479	16.7104	16.7292	16.6026	14.0365	17.4594	17.8262	17.5638	17.7789
20uM E2 vs. DMSO	Q6P9B6	MEAK7	MTOR-associated protein MEAK7	-0.265583	1.77339	14.6321	14.656	14.6944	14.6398	14.385	14.4743	14.318	14.3826
20uM E2 vs. DMSO	Q15758	SLC1A5	Neutral amino acid transporter B(0)	-0.309453	1.7733	15.7718	15.9721	15.7154	15.9527	15.7012	15.5688	15.3391	15.565
20uM E2 vs. DMSO	Q9NVA1	UQCC1	Ubiquinol-cytochrome c reductase complex assembly factor 1	0.198016	1.77171	17.2613	17.3552	17.3984	17.1668	17.4692	17.5362	17.4516	17.5167
20uM E2 vs. DMSO	Q09472	EP300	Histone acetyltransferase p300	-0.310942	1.77139	16.2986	16.245	16.1768	16.1839	15.6401	16.0109	15.9069	16.1026
20uM E2 vs. DMSO	Q6ZNW5	GDPGP1	GDP-D-glucose phosphorylase 1	0.413411	1.7705	14.8288	14.2999	14.5629	14.7548	14.9261	15.2433	15.0025	14.9281
20uM E2 vs. DMSO	Q9NZJ0	DTL	Denticleless protein homolog	-0.954632	1.77037	13.0153	12.9106	12.6256	13.2543	11.4849	12.415	11.4049	12.6825
20uM E2 vs. DMSO	Q15061	WDR43	WD repeat-containing protein 43	-0.354484	1.77024	19.7098	19.2628	19.4488	19.2428	18.9015	19.0886	18.9732	19.283
20uM E2 vs. DMSO	P52597	HNRNPF	Heterogeneous nuclear ribonucleoprotein F	-0.225286	1.76934	21.1168	20.9033	20.9186	20.8207	20.6462	20.7193	20.6424	20.8504
20uM E2 vs. DMSO	Q9Y6D9	MAD1L1	Mitotic spindle assembly checkpoint protein MAD1	-0.251251	1.76801	17.0326	16.8605	16.9355	16.9467	16.7277	16.8479	16.4996	16.6952
20uM E2 vs. DMSO	O14732	IMPA2	Inositol monophosphatase 2	-0.175116	1.7658	17.995	18.0894	18.0441	18.0642	17.7945	17.9157	17.8143	17.9678
20uM E2 vs. DMSO	Q9HAV7	GRPEL1	GrpE protein homolog 1, mitochondrial	0.327284	1.76559	18.0511	17.6846	17.9341	17.7218	18.1059	18.1939	17.9966	18.4043
20uM E2 vs. DMSO	O60763	USO1	General vesicular transport factor p115	0.187086	1.76447	20.5273	20.538	20.6588	20.5538	20.6308	20.8024	20.8738	20.7192
20uM E2 vs. DMSO	Q9P2K3	RCOR3	REST corepressor 3	-0.241181	1.76302	17.078	17.0968	16.8867	16.8457	16.7418	16.637	16.7336	16.8301
20uM E2 vs. DMSO	Q15650	TRIP4	Activating signal cointegrator 1	0.235486	1.76292	16.466	16.3576	16.1788	16.3778	16.5087	16.5482	16.6098	16.6555
20uM E2 vs. DMSO	Q9Y5Z4	HEBP2	Heme-binding protein 2	0.189533	1.76246	18.3561	18.2982	18.2683	18.3189	18.4181	18.4724	18.4503	18.6589
20uM E2 vs. DMSO	Q9ULH7	MRTFB	Myocardin-related transcription factor B	0.335473	1.76119	17.6328	17.5263	17.5734	17.1583	17.6364	17.9058	17.7734	17.9171
20uM E2 vs. DMSO	Q14451	GRB7	Growth factor receptor-bound protein 7	-0.173735	1.76113	18.6315	18.6645	18.6689	18.751	18.4069	18.5616	18.466	18.5865
20uM E2 vs. DMSO	O43169	CYB5B	Cytochrome b5 type B	0.266758	1.76056	16.6126	16.4986	16.326	16.3674	16.7137	16.5639	16.7546	16.8395
20uM E2 vs. DMSO	Q9Y597	KCTD3	BTB/POZ domain-containing protein KCTD3	-0.577009	1.75945	13.8069	13.3786	13.3896	13.2056	12.9013	13.0428	13.0579	12.4707
20uM E2 vs. DMSO	P62820	RAB1A	Ras-related protein Rab-1A	0.327986	1.75864	17.6876	17.7056	17.4188	17.75	17.7055	17.9399	18.0874	18.1412
20uM E2 vs. DMSO	O43281	EFS	Embryonal Fyn-associated substrate	-0.273088	1.75832	16.7813	16.634	16.5386	16.5937	16.1596	16.3978	16.5075	16.3904
20uM E2 vs. DMSO	Q12981	BNIP1	Vesicle transport protein SEC20	0.449759	1.75771	15.2281	15.6089	15.405	15.2742	15.4267	15.944	15.8461	16.0986
20uM E2 vs. DMSO	O15118	NPC1	NPC intracellular cholesterol transporter 1	0.547339	1.75729	13.8687	13.9643	13.6221	14.1447	14.3008	14.211	14.3479	14.9294
20uM E2 vs. DMSO	Q15011	HERPUD1	Homocysteine-responsive endoplasmic reticulum-resident ubiquitin-like domain member 1 protein	0.984852	1.75548	11.4271	12.3229	10.9628	11.71	12.1018	12.5535	12.5657	13.1414
20uM E2 vs. DMSO	Q92562	FIG4	Polyphosphoinositide phosphatase	0.427744	1.75454	13.6462	13.4257	13.7087	13.9729	13.965	14.2312	14.0537	14.2146
20uM E2 vs. DMSO	P84022	SMAD3	Mothers against decapentaplegic homolog 3	-0.420053	1.75394	13.0094	13.0555	13.0949	13.2855	12.6074	12.7167	12.6478	12.7932
20uM E2 vs. DMSO	Q92947	GCDH	Glutaryl-CoA dehydrogenase, mitochondrial	0.240572	1.75242	18.4768	18.3876	18.3784	18.264	18.5809	18.4974	18.5632	18.8276
20uM E2 vs. DMSO	Q16637	SMN1	Survival motor neuron protein	0.211451	1.75071	16.7023	16.5749	16.5798	16.6109	16.7601	16.8077	16.7714	16.9746
20uM E2 vs. DMSO	Q9NVU7	SDAD1	Protein SDA1 homolog	-0.308507	1.75046	16.0288	16.1491	16.0868	15.9407	15.5458	15.7632	15.9859	15.6765
20uM E2 vs. DMSO	O00629	KPNA4	Importin subunit alpha-3	-0.14851	1.74726	19.373	19.2689	19.2637	19.3502	19.1126	19.1868	19.1452	19.217
20uM E2 vs. DMSO	Q13616	CUL1	Cullin-1	-0.147652	1.74663	17.6004	17.6591	17.6374	17.6578	17.4572	17.521	17.4848	17.5011
20uM E2 vs. DMSO	Q9Y6K5	OAS3	2'-5'-oligoadenylate synthase 3	-0.692058	1.74631	13.2712	13.1663	13.1853	13.3244	13.1269	12.1322	12.7347	12.1852
20uM E2 vs. DMSO	Q13443	ADAM9	Disintegrin and metalloproteinase domain-containing protein 9	0.741561	1.74526	11.8068	12.4409	12.5954	12.1831	13.5428	12.919	12.8723	12.6583
20uM E2 vs. DMSO	Q13496	MTM1	Myotubularin	0.258399	1.74468	15.7959	15.8772	15.6293	15.6714	15.9055	15.9297	16.0989	16.0734
20uM E2 vs. DMSO	Q8NHV4	NEDD1	Protein NEDD1	-0.294137	1.74468	15.0718	15.3359	15.1899	15.3481	14.8026	14.943	15.0283	14.9952
20uM E2 vs. DMSO	Q4KMP7	TBC1D10B	TBC1 domain family member 10B	-0.370622	1.74429	15.6414	15.2378	15.5922	15.4589	15.1271	15.3152	15.1298	14.8758
20uM E2 vs. DMSO	Q99567	NUP88	Nuclear pore complex protein Nup88	-0.263561	1.744	17.6911	17.4329	17.3516	17.3312	17.1078	17.1913	17.1595	17.2939
20uM E2 vs. DMSO	Q15424	SAFB	Scaffold attachment factor B1	-0.266281	1.74304	18.0455	17.768	17.6707	17.8714	17.4669	17.7039	17.5922	17.5274
20uM E2 vs. DMSO	P50895	BCAM	Basal cell adhesion molecule	-0.193905	1.74224	18.3025	18.3618	18.2762	18.3366	18.1688	17.956	18.1762	18.2005
20uM E2 vs. DMSO	Q96S66	CLCC1	Chloride channel CLIC-like protein 1	0.532686	1.74129	15.2906	14.694	15.0196	14.9423	15.0686	15.518	15.8245	15.6661
20uM E2 vs. DMSO	Q9H4M9	EHD1	EH domain-containing protein 1	-0.200828	1.74056	19.6144	19.539	19.4237	19.5312	19.1827	19.3235	19.3501	19.4486
20uM E2 vs. DMSO	Q29RF7	PDS5A	Sister chromatid cohesion protein PDS5 homolog A	-0.199666	1.73932	17.9066	17.7418	17.6608	17.7847	17.5293	17.5966	17.5168	17.6525
20uM E2 vs. DMSO	Q8WUI4	HDAC7	Histone deacetylase 7	-0.524154	1.73925	13.7737	14.2306	14.3349	14.3309	13.5478	14.0112	13.5505	13.464
20uM E2 vs. DMSO	Q9H3H1	TRIT1	tRNA dimethylallyltransferase	-0.495194	1.73779	14.4709	14.3508	14.3154	14.3431	14.2375	13.4217	13.8951	13.9451
20uM E2 vs. DMSO	Q9BXW9	FANCD2	Fanconi anemia group D2 protein	-0.299243	1.73779	15.4215	15.278	15.1911	15.4019	14.9865	15.2052	15.0311	14.8728
20uM E2 vs. DMSO	Q6IA69	NADSYN1	Glutamine-dependent NAD(+) synthetase	0.322905	1.73491	16.0544	15.8572	15.7393	15.7243	15.9396	16.3261	16.1672	16.2339
20uM E2 vs. DMSO	Q14596	NBR1	Next to BRCA1 gene 1 protein	-0.879547	1.73352	12.5466	12.475	12.6443	12.3979	11.1492	11.109	11.9465	12.3408
20uM E2 vs. DMSO	Q9H078	CLPB	Mitochondrial disaggregase	0.375851	1.7332	16.8677	16.6149	16.3709	16.4104	16.9134	16.8002	16.8631	17.1906
20uM E2 vs. DMSO	Q9NUG6	PDRG1	p53 and DNA damage-regulated protein 1	-0.276388	1.73295	16.5929	16.4953	16.4555	16.3121	16.0693	16.0695	16.2607	16.3508
20uM E2 vs. DMSO	P31323	PRKAR2B	cAMP-dependent protein kinase type II-beta regulatory subunit	0.690782	1.73282	14.4775	14.151	13.5418	13.3639	14.7326	14.5768	14.4472	14.5406
20uM E2 vs. DMSO	Q9Y2B9	PKIG	cAMP-dependent protein kinase inhibitor gamma	-2.61312	1.73213	15.3384	15.7436	15.5712	15.6404	13.9445	11.8104	10.6151	15.4712
20uM E2 vs. DMSO	P14927	UQCRB	Cytochrome b-c1 complex subunit 7	0.547971	1.73133	14.8713	14.7859	14.9289	14.6918	15.3646	14.8578	15.3895	15.8578
20uM E2 vs. DMSO	Q99487	PAFAH2	Platelet-activating factor acetylhydrolase 2, cytoplasmic	0.626285	1.72978	13.8449	14.2209	13.2182	13.8707	14.3704	14.4934	14.66	14.1361
20uM E2 vs. DMSO	P27708	CAD	Multifunctional protein CAD	-0.169995	1.72952	19.9143	19.9488	19.8425	19.8657	19.6167	19.6745	19.8088	19.7912
20uM E2 vs. DMSO	Q6NUM9	RETSAT	All-trans-retinol 13,14-reductase	0.50155	1.72873	13.8076	14.3157	14.4899	14.4741	14.5582	14.734	14.9903	14.811
20uM E2 vs. DMSO	O75928	PIAS2	E3 SUMO-protein ligase PIAS2	-0.275794	1.72844	15.6362	15.8365	15.5074	15.6199	15.3754	15.3917	15.2602	15.4696
20uM E2 vs. DMSO	Q49AR2	C5orf22	UPF0489 protein C5orf22	-0.186035	1.72786	16.8016	16.7456	16.7013	16.7539	16.6545	16.4853	16.5731	16.5453
20uM E2 vs. DMSO	P05198	EIF2S1	Eukaryotic translation initiation factor 2 subunit 1	0.164029	1.72782	20.6478	20.594	20.5695	20.5999	20.6491	20.8158	20.7389	20.8636
20uM E2 vs. DMSO	Q9P0K7	RAI14	Ankycorbin	1.72354	1.72455	15.5784	15.3474	15.2849	15.4536	17.7843	17.9177	14.9899	17.8665
20uM E2 vs. DMSO	P36542	ATP5F1C	ATP synthase subunit gamma, mitochondrial	0.412352	1.72363	16.8171	16.8789	16.9107	16.9738	17.227	17.0099	17.2375	17.7557
20uM E2 vs. DMSO	O95255	ABCC6	ATP-binding cassette sub-family C member 6	0.329026	1.72247	17.7063	17.6551	17.6194	17.3939	17.6297	18.0522	17.9106	18.0983
20uM E2 vs. DMSO	Q7L7X3	TAOK1	Serine/threonine-protein kinase TAO1	-0.315317	1.72208	16.4909	16.2634	16.3646	16.5676	16.0941	15.871	16.2985	16.1617
20uM E2 vs. DMSO	Q9UL54	TAOK2	Serine/threonine-protein kinase TAO2	-0.387151	1.72115	14.3733	13.8877	14.1297	14.1295	13.596	13.8094	13.7758	13.7905
20uM E2 vs. DMSO	O75379	VAMP4	Vesicle-associated membrane protein 4	-0.99805	1.71956	11.5432	11.9876	12.3563	11.9207	11.599	10.3011	11.3065	10.609
20uM E2 vs. DMSO	P10515	DLAT	Dihydrolipoyllysine-residue acetyltransferase component of pyruvate dehydrogenase complex, mitochondrial	0.325957	1.71905	18.6392	18.4503	18.4612	18.3074	18.6556	18.7286	18.6692	19.1085
20uM E2 vs. DMSO	P49447	CYB561	Transmembrane ascorbate-dependent reductase CYB561	-0.49927	1.71903	13.7159	13.6919	13.4487	13.4969	13.0408	13.0387	12.7984	13.4784
20uM E2 vs. DMSO	Q9Y6I9	TEX264	Testis-expressed protein 264	0.328403	1.71871	16.2168	15.9854	16.0629	16.2956	16.2271	16.4253	16.5446	16.6772
20uM E2 vs. DMSO	O15382	BCAT2	Branched-chain-amino-acid aminotransferase, mitochondrial	0.2389	1.71328	18.5996	18.3994	18.4986	18.391	18.6908	18.6273	18.6088	18.9173
20uM E2 vs. DMSO	P10586	PTPRF	Receptor-type tyrosine-protein phosphatase F	0.186629	1.71283	18.3615	18.1415	18.2079	18.1497	18.4205	18.4702	18.3588	18.3577
20uM E2 vs. DMSO	P49356	FNTB	Protein farnesyltransferase subunit beta	-0.226118	1.71211	16.1069	16.0776	16.1938	16.2075	15.8352	15.8536	15.9342	16.0583
20uM E2 vs. DMSO	P42224	STAT1	Signal transducer and activator of transcription 1-alpha/beta	-0.170227	1.71147	18.3375	18.3106	18.2079	18.2632	18.0185	18.0926	18.1274	18.2
20uM E2 vs. DMSO	P50747	HLCS	Biotin--protein ligase	0.37108	1.71137	14.5435	14.6104	14.7457	14.2455	14.8684	15.0601	14.7674	14.9333
20uM E2 vs. DMSO	P35080	PFN2	Profilin-2	0.266485	1.71107	20.3545	20.0089	20.1739	20.1706	20.3021	20.4969	20.3492	20.6257
20uM E2 vs. DMSO	Q96A72	MAGOHB	Protein mago nashi homolog 2	-0.208785	1.70948	18.4039	18.4586	18.2688	18.1631	18.0552	18.1219	18.1368	18.1452
20uM E2 vs. DMSO	O75586	MED6	Mediator of RNA polymerase II transcription subunit 6	-0.322242	1.70891	15.0976	15.0984	15.0476	14.9583	14.7837	14.962	14.6235	14.5437
20uM E2 vs. DMSO	Q99523	SORT1	Sortilin	-0.294688	1.70561	15.937	15.8966	15.7518	15.6284	15.473	15.366	15.5178	15.6781
20uM E2 vs. DMSO	Q8TBQ9	TMEM167A	Protein kish-A	0.499227	1.7048	13.6306	13.7377	13.429	13.9866	14.0483	14.5145	13.9254	14.2925
20uM E2 vs. DMSO	Q9H2P0	ADNP	Activity-dependent neuroprotector homeobox protein	-0.273125	1.70407	18.3275	18.2109	18.1237	18.2471	17.6952	17.9451	18.0722	18.1041
20uM E2 vs. DMSO	Q9NQX3	GPHN	Gephyrin	0.178038	1.70354	17.3512	17.383	17.4126	17.3336	17.4291	17.5684	17.5555	17.6395
20uM E2 vs. DMSO	Q7Z5L9	IRF2BP2	Interferon regulatory factor 2-binding protein 2	0.224757	1.70161	17.9751	17.9286	17.7484	17.7629	17.9967	18.0736	18.0167	18.2271
20uM E2 vs. DMSO	P78406	RAE1	mRNA export factor RAE1	-0.203439	1.70146	20.485	20.1894	20.2622	20.283	20.0151	20.079	20.1555	20.1564
20uM E2 vs. DMSO	Q9UM22	EPDR1	Mammalian ependymin-related protein 1	0.384299	1.70112	16.9409	17.2273	16.8121	16.9868	17.1154	17.4311	17.2641	17.6935
20uM E2 vs. DMSO	Q9UHQ1	NARF	Nuclear prelamin A recognition factor	-0.830866	1.6995	15.6641	16.0056	15.7139	16.159	15.998	14.8639	14.814	14.543
20uM E2 vs. DMSO	P01037	CST1	Cystatin-SN	0.596798	1.69886	12.9656	12.4772	13.3156	13.2344	13.7815	13.3606	13.5381	13.6998
20uM E2 vs. DMSO	A0AVT1	UBA6	Ubiquitin-like modifier-activating enzyme 6	0.188901	1.69801	18.8761	18.6597	18.6092	18.7617	18.893	18.9453	18.8759	18.9482
20uM E2 vs. DMSO	Q6P444	MTFR2	Mitochondrial fission regulator 2	-0.320268	1.69522	16.6885	16.568	16.5175	16.6198	16.4713	16.4249	15.9787	16.2378
20uM E2 vs. DMSO	P00441	SOD1	Superoxide dismutase [Cu-Zn]	0.199216	1.69511	21.9739	21.7735	21.7048	21.7914	22.0135	21.9268	21.9818	22.1183
20uM E2 vs. DMSO	P30101	PDIA3	Protein disulfide-isomerase A3	0.209333	1.6941	22.3418	22.4362	22.4145	22.1818	22.4875	22.6602	22.4579	22.6059
20uM E2 vs. DMSO	O15119	TBX3	T-box transcription factor TBX3	1.23997	1.6933	10.9112	12.0394	10.4617	12.2225	13.071	11.9843	12.7104	12.8288
20uM E2 vs. DMSO	Q86UW7	CADPS2	Calcium-dependent secretion activator 2	0.455043	1.69232	13.2347	13.6814	13.6671	13.7769	13.9767	14.3113	13.9514	13.9408
20uM E2 vs. DMSO	P61086	UBE2K	Ubiquitin-conjugating enzyme E2 K	0.139245	1.69127	20.3186	20.2725	20.2581	20.3036	20.3446	20.4972	20.4129	20.4552
20uM E2 vs. DMSO	O75381	PEX14	Peroxisomal membrane protein PEX14	0.569688	1.69008	14.2732	14.929	14.6677	15.1823	15.0115	15.4317	15.5453	15.3425
20uM E2 vs. DMSO	Q9BT09	CNPY3	Protein canopy homolog 3	0.231587	1.68936	15.4918	15.4733	15.4462	15.5089	15.721	15.6925	15.5824	15.8507
20uM E2 vs. DMSO	O43353	RIPK2	Receptor-interacting serine/threonine-protein kinase 2	-0.353014	1.6834	15.176	15.0988	15.0385	15.2498	14.4661	14.8784	14.8432	14.9634
20uM E2 vs. DMSO	Q0VDG4	SCRN3	Secernin-3	0.233918	1.68332	16.428	16.4555	16.2282	16.4373	16.4711	16.6785	16.652	16.6831
20uM E2 vs. DMSO	Q9UJZ1	STOML2	Stomatin-like protein 2, mitochondrial	0.485545	1.68253	16.9257	17.0138	17.2251	17.3921	17.3661	17.3449	17.7289	18.059
20uM E2 vs. DMSO	O43307;Q96N96;Q9NR80	ARHGEF9;SPATA13;ARHGEF4	Rho guanine nucleotide exchange factor 9;Spermatogenesis-associated protein 13;Rho guanine nucleotide exchange factor 4	0.535532	1.68	12.7802	12.0902	12.3545	12.2424	12.9026	13.029	12.8359	12.8419
20uM E2 vs. DMSO	Q9Y3B3	TMED7	Transmembrane emp24 domain-containing protein 7	0.353327	1.67924	14.1903	14.0687	14.1504	14.3171	14.418	14.3482	14.7623	14.6113
20uM E2 vs. DMSO	Q96EY8	MMAB	Corrinoid adenosyltransferase MMAB	0.29005	1.67892	16.8222	16.6443	16.656	16.5151	16.9508	16.8575	16.8005	17.1891
20uM E2 vs. DMSO	Q8N3C0	ASCC3	Activating signal cointegrator 1 complex subunit 3	0.191256	1.67844	16.87	17.007	16.9035	17.015	17.0268	17.2006	17.1751	17.158
20uM E2 vs. DMSO	P47813	EIF1AX	Eukaryotic translation initiation factor 1A, X-chromosomal	-0.153215	1.67839	20.0482	20.0501	19.9465	20.0419	19.7785	19.9139	19.8394	19.9421
20uM E2 vs. DMSO	Q10471	GALNT2	Polypeptide N-acetylgalactosaminyltransferase 2	0.417067	1.67837	14.732	14.5259	14.3851	14.6748	14.6113	15.0996	15.1141	15.161
20uM E2 vs. DMSO	Q05655	PRKCD	Protein kinase C delta type	0.308921	1.67822	16.5444	16.4419	16.591	16.7467	16.6967	16.9915	16.7632	17.1084
20uM E2 vs. DMSO	P61165	TMEM258	Transmembrane protein 258	0.835822	1.67758	15.0527	14.1532	13.982	14.5492	14.9287	15.3841	14.8339	15.9338
20uM E2 vs. DMSO	Q8IXQ4	GPALPP1	GPALPP motifs-containing protein 1	-0.414519	1.67672	15.0818	14.5993	14.8666	15.1206	14.3625	14.4293	14.4595	14.7589
20uM E2 vs. DMSO	Q96FS4	SIPA1	Signal-induced proliferation-associated protein 1	0.308181	1.67546	19.0124	18.9702	18.9129	18.7129	18.9775	19.4647	19.1343	19.2646
20uM E2 vs. DMSO	Q92820	GGH	Gamma-glutamyl hydrolase	-0.179995	1.6749	18.8145	18.7765	18.7428	18.7297	18.5617	18.5178	18.5184	18.7458
20uM E2 vs. DMSO	P0C870	JMJD7	Bifunctional peptidase and (3S)-lysyl hydroxylase JMJD7	0.280931	1.67489	16.3918	16.2676	16.2667	16.2623	16.3533	16.5302	16.6236	16.8048
20uM E2 vs. DMSO	Q15906	VPS72	Vacuolar protein sorting-associated protein 72 homolog	-0.307649	1.6743	15.2558	15.253	15.6269	15.5176	15.1512	15.0319	15.0712	15.1684
20uM E2 vs. DMSO	P11217	PYGM	Glycogen phosphorylase, muscle form	0.481195	1.67354	14.0428	14.3644	14.709	14.7507	15.0575	14.7914	14.8458	15.0971
20uM E2 vs. DMSO	Q3KRA6	C2orf76	UPF0538 protein C2orf76	0.359907	1.67158	14.5031	14.2482	14.5382	14.6233	14.8483	14.9005	14.5961	15.0075
20uM E2 vs. DMSO	O75110	ATP9A	Probable phospholipid-transporting ATPase IIA	0.413378	1.67157	14.6185	14.7227	14.173	14.2949	14.658	14.9145	14.9529	14.9373
20uM E2 vs. DMSO	Q13428	TCOF1	Treacle protein	-0.24036	1.67105	17.9934	17.8637	17.8944	17.9185	17.5313	17.869	17.5489	17.7593
20uM E2 vs. DMSO	Q9HCU5	PREB	Prolactin regulatory element-binding protein	0.562144	1.66906	14.817	15.4162	14.7304	15.3433	15.4406	15.5504	15.5015	16.0629
20uM E2 vs. DMSO	Q15181	PPA1	Inorganic pyrophosphatase	0.200589	1.66765	21.2964	21.3286	21.3275	21.3709	21.3906	21.4632	21.5526	21.7195
20uM E2 vs. DMSO	Q15334	LLGL1	Lethal(2) giant larvae protein homolog 1	-0.392353	1.66748	16.275	16.4425	16.4865	16.6139	16.1177	15.6601	16.2234	16.2473
20uM E2 vs. DMSO	Q9ULJ6	ZMIZ1	Zinc finger MIZ domain-containing protein 1	-0.197179	1.66671	17.3535	17.1929	17.2381	17.2009	16.9537	17.0851	16.9986	17.1594
20uM E2 vs. DMSO	Q9Y4R8	TELO2	Telomere length regulation protein TEL2 homolog	-0.43785	1.66628	16.2123	16.5268	16.3498	16.1491	15.8004	16.0543	16.1598	15.4721
20uM E2 vs. DMSO	P11474	ESRRA	Steroid hormone receptor ERR1	0.611833	1.66542	11.4208	11.6755	11.3556	11.4263	11.9915	11.766	12.3742	12.1939
20uM E2 vs. DMSO	Q96T51	RUFY1	RUN and FYVE domain-containing protein 1	0.505762	1.66425	17.1204	17.1268	16.3395	17.2008	17.3596	17.6021	17.4515	17.3973
20uM E2 vs. DMSO	P40616	ARL1	ADP-ribosylation factor-like protein 1	0.725503	1.6638	14.9167	16.1508	15.0305	15.1166	15.7331	16.1111	16.2153	16.0571
20uM E2 vs. DMSO	Q9NPE3	NOP10	H/ACA ribonucleoprotein complex subunit 3	0.480592	1.66367	13.4251	13.6533	14.0347	13.8031	13.8811	14.3203	14.3911	14.2461
20uM E2 vs. DMSO	Q9Y5J6	TIMM10B	Mitochondrial import inner membrane translocase subunit Tim10 B	0.70966	1.66327	13.5208	13.4055	13.4853	12.6112	13.7983	13.8159	13.7567	14.4906
20uM E2 vs. DMSO	O43617	TRAPPC3	Trafficking protein particle complex subunit 3	0.272737	1.66206	16.7333	16.9282	16.8352	16.6261	16.8329	17.09	17.1675	17.1235
20uM E2 vs. DMSO	Q9BT78	COPS4	COP9 signalosome complex subunit 4	0.178647	1.66175	19.203	19.0981	19.1516	19.1045	19.1783	19.4305	19.2975	19.3655
20uM E2 vs. DMSO	P30040	ERP29	Endoplasmic reticulum resident protein 29	0.184423	1.66126	20.3211	20.2271	20.0907	20.0653	20.3426	20.3911	20.3058	20.4023
20uM E2 vs. DMSO	P55795	HNRNPH2	Heterogeneous nuclear ribonucleoprotein H2	0.20696	1.66092	18.4087	18.3623	18.2021	18.1391	18.4236	18.4497	18.4908	18.5758
20uM E2 vs. DMSO	Q5SRE5	NUP188	Nucleoporin NUP188	-0.241513	1.65988	16.9683	16.749	16.8234	16.6822	16.4304	16.5673	16.5688	16.6904
20uM E2 vs. DMSO	P49189	ALDH9A1	4-trimethylaminobutyraldehyde dehydrogenase	0.207568	1.65903	21.2862	21.2881	21.126	21.2354	21.3099	21.3968	21.4343	21.6251
20uM E2 vs. DMSO	O95049	TJP3	Tight junction protein ZO-3	0.196109	1.65867	16.928	16.8318	16.7404	16.8125	16.9238	17.0643	16.9963	17.1128
20uM E2 vs. DMSO	Q13362	PPP2R5C	Serine/threonine-protein phosphatase 2A 56 kDa regulatory subunit gamma isoform	0.240966	1.65858	19.3682	19.4232	19.4962	19.4431	19.4736	19.5764	19.811	19.8336
20uM E2 vs. DMSO	P49590	HARS2	Histidine--tRNA ligase, mitochondrial	0.181282	1.65839	19.0535	18.9712	18.9296	18.9067	19.2614	19.201	19.044	19.0796
20uM E2 vs. DMSO	Q96HA8	NTAQ1	Protein N-terminal glutamine amidohydrolase	0.776467	1.65711	14.7018	13.5884	14.5985	15.0229	15.0325	15.4837	15.2221	15.2792
20uM E2 vs. DMSO	Q969R2	OSBP2	Oxysterol-binding protein 2	-1.14983	1.65661	11.9873	12.1016	12.4687	12.8251	11.9372	10.3195	10.6895	11.8372
20uM E2 vs. DMSO	O60762	DPM1	Dolichol-phosphate mannosyltransferase subunit 1	0.452631	1.6559	13.0694	13.3838	13.0191	13.3356	13.8187	13.3463	13.7857	13.6678
20uM E2 vs. DMSO	P10606	COX5B	Cytochrome c oxidase subunit 5B, mitochondrial	0.454539	1.65507	16.8053	16.7241	16.4073	16.6795	17.0646	16.839	16.9442	17.5865
20uM E2 vs. DMSO	Q5T9C2	EEIG1	Early estrogen-induced gene 1 protein	0.33129	1.65504	15.1674	14.7514	15.0642	15.0515	15.1812	15.2885	15.5099	15.3801
20uM E2 vs. DMSO	Q9H939	PSTPIP2	Proline-serine-threonine phosphatase-interacting protein 2	-0.409304	1.65323	15.9155	15.7748	15.7904	15.7161	14.944	15.5476	15.4458	15.6223
20uM E2 vs. DMSO	Q5VTL8	PRPF38B	Pre-mRNA-splicing factor 38B	0.742693	1.65313	18.1812	17.0976	18.1291	17.3379	18.7741	18.2258	18.6211	18.0956
20uM E2 vs. DMSO	Q8WYN0	ATG4A	Cysteine protease ATG4A	0.367923	1.65181	14.9763	14.9465	15.0921	15.0906	15.077	15.4811	15.3319	15.6873
20uM E2 vs. DMSO	P04920	SLC4A2	Anion exchange protein 2	-0.236086	1.65093	16.4543	16.4249	16.4159	16.3133	15.9808	16.1741	16.2036	16.3056
20uM E2 vs. DMSO	P09622	DLD	Dihydrolipoyl dehydrogenase, mitochondrial	0.249633	1.65075	19.7752	19.716	19.7643	19.5474	19.9235	19.8755	19.8156	20.1869
20uM E2 vs. DMSO	Q5GLZ8	HERC4	Probable E3 ubiquitin-protein ligase HERC4	-0.209747	1.65053	17.5894	17.5177	17.3901	17.5631	17.254	17.4623	17.2809	17.2241
20uM E2 vs. DMSO	O95785	WIZ	Protein Wiz	-0.216421	1.65049	16.8987	16.8156	16.7554	16.7892	16.4827	16.6354	16.5247	16.7505
20uM E2 vs. DMSO	Q13492	PICALM	Phosphatidylinositol-binding clathrin assembly protein	0.208293	1.64852	17.7396	17.8106	17.5762	17.6489	17.7817	18.0196	17.884	17.9233
20uM E2 vs. DMSO	Q4ZG55	GREB1	Protein GREB1	0.269937	1.648	16.8176	16.537	16.4275	16.7408	16.7934	16.9047	16.9271	16.9775
20uM E2 vs. DMSO	Q8N3F8	MICALL1	MICAL-like protein 1	-0.38613	1.64415	13.3771	13.4764	13.4224	13.6136	12.9242	13.0114	13.1389	13.2706
20uM E2 vs. DMSO	O60826	CCDC22	Coiled-coil domain-containing protein 22	-0.348979	1.64295	16.6928	16.5878	17.0425	16.6336	16.1305	16.4826	16.4154	16.5323
20uM E2 vs. DMSO	Q9H845	ACAD9	Complex I assembly factor ACAD9, mitochondrial	-0.376647	1.64223	16.1801	16.2942	16.1979	15.9288	15.8458	15.441	15.771	16.0367
20uM E2 vs. DMSO	O43776	NARS1	Asparagine--tRNA ligase, cytoplasmic	0.176494	1.64195	21.2609	21.127	21.1004	21.1364	21.2205	21.4613	21.3317	21.3172
20uM E2 vs. DMSO	P86452	ZBED6	Zinc finger BED domain-containing protein 6	-0.47435	1.64173	14.5123	14.5337	14.2836	14.2878	14.0965	14.0067	13.4577	14.159
20uM E2 vs. DMSO	P56134	ATP5MF	ATP synthase subunit f, mitochondrial	0.858103	1.64159	14.3307	14.7804	14.6227	14.845	15.0745	14.8782	15.6358	16.4227
20uM E2 vs. DMSO	Q96BJ3	AIDA	Axin interactor, dorsalization-associated protein	-0.238075	1.6414	16.4924	16.2508	16.3077	16.2611	16.0132	16.0943	16.0213	16.2309
20uM E2 vs. DMSO	Q7L576	CYFIP1	Cytoplasmic FMR1-interacting protein 1	-0.15995	1.64105	18.8644	18.7537	18.7488	18.7947	18.5315	18.6592	18.6154	18.7158
20uM E2 vs. DMSO	Q9GZT9	EGLN1	Egl nine homolog 1	-0.34389	1.63858	17.0269	16.7405	16.7573	16.8187	16.3533	16.8448	16.3603	16.4094
20uM E2 vs. DMSO	Q13510	ASAH1	Acid ceramidase	0.224049	1.63467	20.1564	20.1301	19.9754	20.0615	20.1852	20.2233	20.2875	20.5235
20uM E2 vs. DMSO	P07437	TUBB	Tubulin beta chain	-0.199277	1.63434	22.7655	22.6936	22.7707	22.8508	22.6597	22.4821	22.4378	22.7039
20uM E2 vs. DMSO	O15446	POLR1G	DNA-directed RNA polymerase I subunit RPA34	-0.317261	1.63405	16.2492	15.9283	15.8172	16.1222	15.846	15.7852	15.662	15.5546
20uM E2 vs. DMSO	Q9Y692	GMEB1	Glucocorticoid modulatory element-binding protein 1	-0.285603	1.6335	14.6485	14.5567	14.6475	14.4063	14.3155	14.1766	14.2785	14.346
20uM E2 vs. DMSO	O15042	U2SURP	U2 snRNP-associated SURP motif-containing protein	-0.212639	1.63249	18.4489	18.3788	18.3848	18.3243	17.9587	18.2795	18.222	18.226
20uM E2 vs. DMSO	O95197	RTN3	Reticulon-3	0.254631	1.63156	19.1525	19.1074	18.989	19.0874	19.084	19.461	19.3106	19.4993
20uM E2 vs. DMSO	Q86X55	CARM1	Histone-arginine methyltransferase CARM1	-0.164654	1.63078	18.6978	18.6094	18.4817	18.5858	18.3722	18.4322	18.429	18.4828
20uM E2 vs. DMSO	Q9H2G2	SLK	STE20-like serine/threonine-protein kinase	0.43822	1.62959	16.7458	16.3857	16.9614	16.9019	16.8568	17.1405	17.2838	17.4665
20uM E2 vs. DMSO	Q5VWZ2	LYPLAL1	Lysophospholipase-like protein 1	0.253222	1.62746	18.0313	17.7675	17.7987	17.7881	18.0179	17.9786	18.0897	18.3123
20uM E2 vs. DMSO	Q96BW1	UPRT	Uracil phosphoribosyltransferase homolog	0.387108	1.62745	16.0141	16.0166	15.8109	15.8439	15.8859	16.5164	16.3665	16.4652
20uM E2 vs. DMSO	P13804	ETFA	Electron transfer flavoprotein subunit alpha, mitochondrial	0.206438	1.62733	20.3299	20.2804	20.2586	20.2019	20.5065	20.3332	20.3926	20.6642
20uM E2 vs. DMSO	Q8N3R9	PALS1	Protein PALS1	-0.877528	1.62726	16.0833	17.0962	15.7848	16.8878	15.7587	15.8758	15.7563	14.9512
20uM E2 vs. DMSO	Q13541	EIF4EBP1	Eukaryotic translation initiation factor 4E-binding protein 1	0.279216	1.62685	16.9003	16.7294	16.487	16.6306	17.0554	16.795	16.9863	17.0274
20uM E2 vs. DMSO	Q13573	SNW1	SNW domain-containing protein 1	-0.300288	1.62654	16.2511	16.6478	16.6787	16.4993	16.0707	16.211	16.2541	16.3398
20uM E2 vs. DMSO	Q9P2K5	MYEF2	Myelin expression factor 2	-0.213223	1.62644	17.0829	16.9221	16.9353	16.9847	16.6719	16.744	16.719	16.9371
20uM E2 vs. DMSO	P50336	PPOX	Protoporphyrinogen oxidase	0.400252	1.62602	16.8029	16.1947	16.638	16.7217	16.823	17.0905	16.8459	17.199
20uM E2 vs. DMSO	Q9UJ70	NAGK	N-acetyl-D-glucosamine kinase	0.210671	1.62592	19.0192	19.048	18.8467	18.9606	19.0327	19.1886	19.1519	19.344
20uM E2 vs. DMSO	P46777	RPL5	Large ribosomal subunit protein uL18	0.198601	1.62553	20.3809	20.1252	20.1236	20.2961	20.3276	20.4936	20.4414	20.4576
20uM E2 vs. DMSO	Q14331	FRG1	Protein FRG1	-0.250352	1.62488	16.737	16.5741	16.4549	16.6858	16.3034	16.5037	16.2308	16.4126
20uM E2 vs. DMSO	Q9Y315	DERA	Deoxyribose-phosphate aldolase	-0.194536	1.62379	17.3959	17.2962	17.3256	17.5006	17.0931	17.1495	17.2821	17.2155
20uM E2 vs. DMSO	Q9Y3Q8	TSC22D4	TSC22 domain family protein 4	0.27121	1.62312	15.9954	15.9294	15.768	15.7854	16.1369	15.9345	16.2009	16.2908
20uM E2 vs. DMSO	P46379	BAG6	Large proline-rich protein BAG6	0.201418	1.62274	19.222	19.0473	19.127	19.1518	19.2121	19.2877	19.3391	19.5148
20uM E2 vs. DMSO	O94864	SUPT7L	STAGA complex 65 subunit gamma	-0.675956	1.61886	15.1214	15.0576	15.0848	14.6275	13.6318	14.1768	14.5683	14.8106
20uM E2 vs. DMSO	O75676	RPS6KA4	Ribosomal protein S6 kinase alpha-4	-0.338241	1.61873	17.0922	16.7353	16.9529	16.6939	16.2472	16.6757	16.6219	16.5765
20uM E2 vs. DMSO	Q03001	DST	Dystonin	-1.46034	1.61869	15.0109	15.4892	15.3991	15.4471	14.801	15.1203	12.7698	12.8138
20uM E2 vs. DMSO	Q96BJ8	ELMO3	Engulfment and cell motility protein 3	0.258256	1.61817	15.3344	15.532	15.4526	15.457	15.5677	15.6896	15.6564	15.8954
20uM E2 vs. DMSO	Q5JSH3	WDR44	WD repeat-containing protein 44	0.276468	1.61803	16.532	16.2832	16.2693	16.1661	16.5926	16.5058	16.4862	16.7719
20uM E2 vs. DMSO	O75347	TBCA	Tubulin-specific chaperone A	0.209628	1.61744	20.9425	20.6794	20.8035	20.786	20.8725	21.0943	20.9588	21.1243
20uM E2 vs. DMSO	Q8IWV7	UBR1	E3 ubiquitin-protein ligase UBR1	0.226084	1.61728	16.581	16.3708	16.3152	16.5235	16.5811	16.7743	16.6626	16.6768
20uM E2 vs. DMSO	Q8N5C7	DTWD1	tRNA-uridine aminocarboxypropyltransferase 1	-0.768316	1.61619	14.5257	14.5656	14.3372	14.5254	14.1308	14.0154	12.7752	13.9593
20uM E2 vs. DMSO	Q9H5X1	CIAO2A	Cytosolic iron-sulfur assembly component 2A	0.242429	1.61516	16.9457	16.7215	16.649	16.7903	16.8482	17.1192	17.0579	17.0509
20uM E2 vs. DMSO	Q03393	PTS	6-pyruvoyl tetrahydrobiopterin synthase	-0.494878	1.61477	15.3051	15.2944	15.2783	15.207	14.8528	14.8955	14.213	15.144
20uM E2 vs. DMSO	Q8WUA8	TSKU	Tsukushi	1.85229	1.61476	10.7917	14.316	13.1314	14.0072	15.361	14.8264	14.8959	14.5721
20uM E2 vs. DMSO	P15529	CD46	Membrane cofactor protein	0.262155	1.61371	15.5729	15.5832	15.7692	15.8179	15.7983	16.0122	15.9106	16.0708
20uM E2 vs. DMSO	P09132	SRP19	Signal recognition particle 19 kDa protein	0.207714	1.61282	17.5649	17.3657	17.3808	17.2808	17.5981	17.5447	17.563	17.7171
20uM E2 vs. DMSO	Q7Z6M4	MTERF4	Transcription termination factor 4, mitochondrial	0.30939	1.61282	14.3691	14.4398	14.1323	14.3241	14.5449	14.5411	14.6167	14.8003
20uM E2 vs. DMSO	Q04864	REL	Proto-oncogene c-Rel	-0.562433	1.61152	13.6871	13.7363	13.1802	13.1205	12.6885	13.1364	13.0051	12.6444
20uM E2 vs. DMSO	Q96L93	KIF16B	Kinesin-like protein KIF16B	0.444373	1.61103	18.9102	18.1149	18.5263	18.7229	18.8774	18.9693	18.9401	19.2649
20uM E2 vs. DMSO	Q6FIF0	ZFAND6	AN1-type zinc finger protein 6	0.300894	1.60973	16.6806	16.5449	16.5169	16.4684	16.6223	16.7746	16.8855	17.1319
20uM E2 vs. DMSO	Q86UE8	TLK2	Serine/threonine-protein kinase tousled-like 2	-0.505747	1.60966	14.6294	13.9554	14.4771	14.6817	14.0861	13.968	13.6299	14.0365
20uM E2 vs. DMSO	O75175	CNOT3	CCR4-NOT transcription complex subunit 3	-0.179548	1.60957	17.7962	17.6054	17.65	17.6796	17.4359	17.5236	17.455	17.5986
20uM E2 vs. DMSO	A6NHL2	TUBAL3	Tubulin alpha chain-like 3	-0.522192	1.60812	19.8052	19.5327	19.4744	19.5902	19.2591	19.4691	18.4695	19.116
20uM E2 vs. DMSO	Q14789	GOLGB1	Golgin subfamily B member 1	0.289354	1.60728	18.0195	17.9289	17.6673	17.7935	17.9004	18.3117	18.2062	18.1483
20uM E2 vs. DMSO	Q9UKL0	RCOR1	REST corepressor 1	-0.19447	1.60652	17.9779	17.7504	17.7876	17.7288	17.5706	17.6052	17.5811	17.7099
20uM E2 vs. DMSO	Q9P2T1	GMPR2	GMP reductase 2	0.256594	1.6065	18.7956	18.5448	18.5261	18.6126	18.6668	18.9905	18.8285	19.0196
20uM E2 vs. DMSO	P00367	GLUD1	Glutamate dehydrogenase 1, mitochondrial	0.241297	1.60615	20.5989	20.5904	20.557	20.3464	20.7726	20.6343	20.6758	20.9751
20uM E2 vs. DMSO	Q9BYX4	IFIH1	Interferon-induced helicase C domain-containing protein 1	-0.685636	1.60597	12.9596	12.8298	12.9738	12.9967	12.2077	12.031	11.8139	12.9649
20uM E2 vs. DMSO	P22681	CBL	E3 ubiquitin-protein ligase CBL	-0.367417	1.6057	15.1904	15.0207	15.159	15.2316	14.437	14.8789	14.7785	15.0376
20uM E2 vs. DMSO	Q9NYV6	RRN3	RNA polymerase I-specific transcription initiation factor RRN3	-0.348109	1.60541	15.8861	15.4246	15.851	15.6295	15.2332	15.3581	15.2447	15.5628
20uM E2 vs. DMSO	A8CG34;Q96HA1	POM121C;POM121	Nuclear envelope pore membrane protein POM 121C;Nuclear envelope pore membrane protein POM 121	-0.294043	1.6046	14.5046	14.6506	14.4012	14.4211	14.1987	14.0745	14.2123	14.3158
20uM E2 vs. DMSO	Q9UER7	DAXX	Death domain-associated protein 6	-0.276605	1.60415	16.5826	16.7306	16.6355	16.5123	16.3833	16.5801	16.1963	16.1948
20uM E2 vs. DMSO	Q9BXP5	SRRT	Serrate RNA effector molecule homolog	0.30453	1.60253	20.8654	20.4144	20.7868	20.6036	20.8469	21.1717	20.847	21.0227
20uM E2 vs. DMSO	Q15102	PAFAH1B3	Platelet-activating factor acetylhydrolase IB subunit alpha1	-0.197014	1.60238	20.8568	20.7391	20.671	20.7435	20.4104	20.5644	20.5296	20.7179
20uM E2 vs. DMSO	P52594	AGFG1	Arf-GAP domain and FG repeat-containing protein 1	0.18023	1.60066	16.9899	16.9524	17.1315	16.9355	17.2498	17.1894	17.1288	17.1622
20uM E2 vs. DMSO	Q6ZTN6	ANKRD13D	Ankyrin repeat domain-containing protein 13D	-0.320304	1.60054	14.7457	14.651	14.5457	14.674	14.3059	14.4959	14.0927	14.4405
20uM E2 vs. DMSO	Q9BSH4	TACO1	Translational activator of cytochrome c oxidase 1	0.228329	1.60053	16.9631	16.9207	17.0154	16.8293	17.1424	17.1989	16.9805	17.32
20uM E2 vs. DMSO	P12235	SLC25A4	ADP/ATP translocase 1	1.0944	1.59987	12.4629	14.4426	14.081	13.3905	14.4223	14.5202	14.5511	15.261
20uM E2 vs. DMSO	P52739	ZNF131	Zinc finger protein 131	-0.448173	1.59887	13.5318	13.4693	13.2129	13.3839	12.9454	12.6582	12.9613	13.2404
20uM E2 vs. DMSO	P30039	PBLD	Phenazine biosynthesis-like domain-containing protein	-0.243538	1.59844	16.2355	16.1716	15.9434	16.0914	15.9549	15.7955	15.7729	15.9443
20uM E2 vs. DMSO	Q9UKF7	PITPNC1	Cytoplasmic phosphatidylinositol transfer protein 1	-0.580197	1.59828	15.7778	15.6971	15.5914	15.7171	15.2779	14.4037	15.2845	15.4966
20uM E2 vs. DMSO	Q9BT30	ALKBH7	Alpha-ketoglutarate-dependent dioxygenase alkB homolog 7, mitochondrial	0.459352	1.59777	13.5077	13.7692	13.6186	13.8172	14.2911	13.7335	14.0946	14.4308
20uM E2 vs. DMSO	P53999	SUB1	Activated RNA polymerase II transcriptional coactivator p15	-0.185965	1.59737	22.527	22.3346	22.2714	22.3513	22.2568	22.1827	22.0731	22.228
20uM E2 vs. DMSO	Q14061	COX17	Cytochrome c oxidase copper chaperone	0.288815	1.59661	18.6059	18.2181	18.4784	18.4124	18.4812	18.782	18.7169	18.89
20uM E2 vs. DMSO	Q96IX5	ATP5MK	ATP synthase membrane subunit K, mitochondrial	0.501844	1.59647	14.8175	14.7376	14.4883	14.7415	14.7816	15.0147	15.3335	15.6625
20uM E2 vs. DMSO	O14924	RGS12	Regulator of G-protein signaling 12	-0.806537	1.59626	13.5932	13.5811	13.4507	13.6853	12.9334	13.5261	12.6781	11.9466
20uM E2 vs. DMSO	O43272	PRODH	Proline dehydrogenase 1, mitochondrial	0.385796	1.5959	16.4289	16.2095	16.4386	15.9644	16.6835	16.4283	16.5281	16.9447
20uM E2 vs. DMSO	Q8N5G2	MACO1	Macoilin	0.276234	1.59579	15.2492	15.4026	15.2391	15.3117	15.3943	15.5168	15.6069	15.7895
20uM E2 vs. DMSO	Q53H82	LACTB2	Endoribonuclease LACTB2	0.21275	1.59569	18.9803	18.7607	18.8016	18.8164	19.0007	19.0196	18.9485	19.2412
20uM E2 vs. DMSO	Q8WXX5	DNAJC9	DnaJ homolog subfamily C member 9	0.200181	1.59541	20.3969	20.453	20.4519	20.4669	20.5493	20.5355	20.6268	20.8577
20uM E2 vs. DMSO	Q14149	MORC3	MORC family CW-type zinc finger protein 3	-0.327786	1.59531	14.7112	14.6579	14.5156	14.5056	14.2102	14.0946	14.259	14.5153
20uM E2 vs. DMSO	Q96DX5	ASB9	Ankyrin repeat and SOCS box protein 9	0.241466	1.59424	14.5965	14.6424	14.5063	14.4627	14.7827	14.7613	14.8159	14.8139
20uM E2 vs. DMSO	Q16576	RBBP7	Histone-binding protein RBBP7	-0.196478	1.59249	19.4322	19.3651	19.1709	19.1532	19.0761	19.0304	19.1238	19.1052
20uM E2 vs. DMSO	Q8IV48	ERI1	3'-5' exoribonuclease 1	-0.23244	1.5916	15.3205	15.539	15.5484	15.3816	15.2135	15.2658	15.1935	15.1869
20uM E2 vs. DMSO	Q9NNW7	TXNRD2	Thioredoxin reductase 2, mitochondrial	0.251798	1.59071	18.0263	17.8049	17.779	17.7336	18.0609	18.0258	17.9627	18.3016
20uM E2 vs. DMSO	Q13905	RAPGEF1	Rap guanine nucleotide exchange factor 1	-0.484421	1.59067	13.8123	13.7363	13.4145	14.0386	13.4973	13.2483	12.9604	13.3581
20uM E2 vs. DMSO	Q9UHI6	DDX20	Probable ATP-dependent RNA helicase DDX20	-0.234195	1.58788	16.153	15.9169	15.9106	16.0417	15.6406	15.8307	15.7945	15.8195
20uM E2 vs. DMSO	P55060	CSE1L	Exportin-2	-0.205161	1.58727	22.0707	21.9663	21.8547	21.9538	21.6139	21.7416	21.7372	21.9322
20uM E2 vs. DMSO	Q8N4Q1	CHCHD4	Mitochondrial intermembrane space import and assembly protein 40	0.442937	1.5861	14.6058	14.2017	14.3102	14.1326	14.6701	14.4637	14.7747	15.1135
20uM E2 vs. DMSO	Q9ULE0	WWC3	Protein WWC3	0.293374	1.58394	20.2064	19.8987	19.7869	19.9134	20.0682	20.3357	20.1406	20.4345
20uM E2 vs. DMSO	Q6VY07	PACS1	Phosphofurin acidic cluster sorting protein 1	-0.206419	1.58204	16.9954	16.9958	16.9534	17.0582	16.6748	16.7001	16.8581	16.944
20uM E2 vs. DMSO	O14787	TNPO2	Transportin-2	-0.168871	1.58201	18.307	18.3526	18.1959	18.2314	18.0781	18.2131	18.0219	18.0984
20uM E2 vs. DMSO	P18206	VCL	Vinculin	0.169771	1.58083	19.6317	19.4833	19.4628	19.5497	19.5972	19.7233	19.6735	19.8127
20uM E2 vs. DMSO	Q9Y6X3	MAU2	MAU2 chromatid cohesion factor homolog	-0.225466	1.58048	15.9034	15.8192	15.8106	15.8975	15.5638	15.7272	15.7395	15.4983
20uM E2 vs. DMSO	Q13439	GOLGA4	Golgin subfamily A member 4	0.283473	1.58003	16.1585	16.1855	16.1394	16.1906	16.1546	16.4692	16.5301	16.654
20uM E2 vs. DMSO	Q96LB3	IFT74	Intraflagellar transport protein 74 homolog	-0.469792	1.57984	13.3486	12.8973	13.1499	13.0197	12.3364	12.7758	12.6607	12.7636
20uM E2 vs. DMSO	Q9UBV2	SEL1L	Protein sel-1 homolog 1	-0.759345	1.57574	12.9492	12.8698	12.7966	13.0529	11.8925	11.9402	13.0253	11.7731
20uM E2 vs. DMSO	Q13795	ARFRP1	ADP-ribosylation factor-related protein 1	0.446121	1.57285	12.4978	12.8892	12.8411	12.8762	13.2069	13.0871	13.1031	13.4917
20uM E2 vs. DMSO	Q5T9S5	CCDC18	Coiled-coil domain-containing protein 18	0.460033	1.5726	15.9814	16.0813	15.8134	16.0621	16.2514	16.0142	16.7529	16.7597
20uM E2 vs. DMSO	Q5JRX3	PITRM1	Presequence protease, mitochondrial	0.261535	1.57244	18.3147	18.3637	18.3647	18.1817	18.5126	18.3815	18.5363	18.8407
20uM E2 vs. DMSO	Q9BZX2	UCK2	Uridine-cytidine kinase 2	-0.223555	1.56956	18.3689	18.2804	18.0734	18.2183	17.8889	18.0063	17.9797	18.172
20uM E2 vs. DMSO	Q13185	CBX3	Chromobox protein homolog 3	-0.231373	1.56907	19.6086	19.7144	19.6897	19.8712	19.6885	19.4988	19.4431	19.3281
20uM E2 vs. DMSO	Q05823	RNASEL	2-5A-dependent ribonuclease	0.379897	1.56754	14.3525	14.5584	14.3342	14.2595	14.5455	14.9437	14.9967	14.5381
20uM E2 vs. DMSO	P38919	EIF4A3	Eukaryotic initiation factor 4A-III	-0.179381	1.56674	19.2899	19.3295	19.1739	19.2476	18.9874	18.9996	19.1132	19.2232
20uM E2 vs. DMSO	A0A0B4J2D5;P0DPI2	GATD3B;GATD3	Putative glutamine amidotransferase-like class 1 domain-containing protein 3B, mitochondrial;Glutamine amidotransferase-like class 1 domain-containing protein 3, mitochondrial	0.176955	1.56411	18.9735	18.892	18.9202	18.783	18.9935	19.0393	19.0331	19.2106
20uM E2 vs. DMSO	Q8NDC0	MAPK1IP1L	MAPK-interacting and spindle-stabilizing protein-like	0.359572	1.56354	17.8651	17.6641	17.905	18.2054	18.208	18.0681	18.5716	18.2303
20uM E2 vs. DMSO	P08574	CYC1	Cytochrome c1, heme protein, mitochondrial	1.7219	1.56186	9.99999	10.4746	11.5673	11.2704	11.165	12.2035	12.4874	14.3441
20uM E2 vs. DMSO	Q6PJG6	BRAT1	BRCA1-associated ATM activator 1	-0.220562	1.56172	16.7705	16.6543	16.4841	16.5476	16.343	16.4122	16.3228	16.4963
20uM E2 vs. DMSO	Q99805	TM9SF2	Transmembrane 9 superfamily member 2	0.22509	1.5586	16.6775	16.7672	16.6421	16.6919	16.7648	16.8858	17.1268	16.9018
20uM E2 vs. DMSO	Q9NU02	ANKEF1	Ankyrin repeat and EF-hand domain-containing protein 1	0.490127	1.55779	16.6871	16.4218	16.0835	16.2282	16.6001	17.1438	16.5068	17.1304
20uM E2 vs. DMSO	Q8IY47	KBTBD2	Kelch repeat and BTB domain-containing protein 2	-0.271035	1.55773	14.5676	14.6707	14.6254	14.8343	14.4085	14.51	14.3232	14.3721
20uM E2 vs. DMSO	Q8N108	MIER1	Mesoderm induction early response protein 1	-1.83046	1.55674	14.2116	14.0126	14.0387	14.1745	11.5782	13.5306	13.7266	10.2803
20uM E2 vs. DMSO	Q9P2Q2	FRMD4A	FERM domain-containing protein 4A	-0.85755	1.55645	14.0219	14.2114	14.0942	14.151	12.2368	13.3677	13.4463	13.9976
20uM E2 vs. DMSO	P30419	NMT1	Glycylpeptide N-tetradecanoyltransferase 1	0.167404	1.55575	18.3999	18.2228	18.2318	18.2164	18.3637	18.469	18.3991	18.5087
20uM E2 vs. DMSO	Q99536	VAT1	Synaptic vesicle membrane protein VAT-1 homolog	-0.205381	1.5554	17.4199	17.2897	17.1319	17.1795	17.0639	17.1073	16.9617	17.0665
20uM E2 vs. DMSO	O00541	PES1	Pescadillo homolog	-0.170705	1.55538	16.9226	16.9957	16.9885	16.9219	16.6892	16.8422	16.86	16.7545
20uM E2 vs. DMSO	Q92993	KAT5	Histone acetyltransferase KAT5	-0.437532	1.55454	14.2228	13.9634	14.1469	13.8022	13.5579	13.5669	13.3226	13.9378
20uM E2 vs. DMSO	O94888	UBXN7	UBX domain-containing protein 7	-0.228808	1.55344	17.4275	17.1555	17.3243	17.3037	17.2137	16.9613	16.9685	17.1522
20uM E2 vs. DMSO	Q9UGN5	PARP2	Poly [ADP-ribose] polymerase 2	-0.467792	1.55193	15.3048	15.0988	15.0461	15.1943	14.8141	14.2531	15.1266	14.579
20uM E2 vs. DMSO	Q9ULK4	MED23	Mediator of RNA polymerase II transcription subunit 23	0.196885	1.55179	17.0077	16.9682	16.9446	16.9742	16.9977	17.2662	17.1483	17.2702
20uM E2 vs. DMSO	Q9H4H8	FAM83D	Protein FAM83D	-1.06925	1.55157	12.1497	12.1774	12.4802	12.9258	11.3384	10.3483	11.441	12.3284
20uM E2 vs. DMSO	Q9UBN4;Q9UL62	TRPC4;TRPC5	Short transient receptor potential channel 4;Short transient receptor potential channel 5	-0.277744	1.55109	17.2087	17.0146	17.2188	17.2197	16.8909	16.8627	16.657	17.1403
20uM E2 vs. DMSO	Q86W92	PPFIBP1	Liprin-beta-1	-0.431243	1.55089	15.3971	15.0564	15.4914	15.1927	14.5862	14.9486	15.2227	14.6552
20uM E2 vs. DMSO	Q9GZP4	PITHD1	PITH domain-containing protein 1	-0.18955	1.55053	17.7047	17.6114	17.8189	17.7026	17.4732	17.6675	17.4767	17.4619
20uM E2 vs. DMSO	Q4LE39	ARID4B	AT-rich interactive domain-containing protein 4B	0.258411	1.54974	15.4499	15.4588	15.2685	15.3522	15.4797	15.5561	15.7548	15.7723
20uM E2 vs. DMSO	Q9NZL4	HSPBP1	Hsp70-binding protein 1	-0.176395	1.54911	18.4034	18.2702	18.3189	18.3659	18.0212	18.1868	18.1664	18.2786
20uM E2 vs. DMSO	O95394	PGM3	Phosphoacetylglucosamine mutase	-0.133784	1.54863	19.169	19.121	19.0344	19.0886	18.9902	18.9176	19.0129	18.9571
20uM E2 vs. DMSO	Q9BS26	ERP44	Endoplasmic reticulum resident protein 44	0.39488	1.54724	17.3774	17.3052	17.4805	17.5009	17.4733	18.2636	17.8056	17.701
20uM E2 vs. DMSO	P32119	PRDX2	Peroxiredoxin-2	0.197122	1.54512	22.7356	22.509	22.5345	22.5671	22.6546	22.7849	22.7629	22.9322
20uM E2 vs. DMSO	Q93052	LPP	Lipoma-preferred partner	0.217801	1.54494	18.1732	17.9822	17.8823	17.9622	18.1808	18.1665	18.1363	18.3874
20uM E2 vs. DMSO	O15145	ARPC3	Actin-related protein 2/3 complex subunit 3	0.219893	1.54417	19.7497	19.5325	19.5346	19.593	19.6406	19.7986	19.8586	19.9916
20uM E2 vs. DMSO	O60502	OGA	Protein O-GlcNAcase	-0.182694	1.54332	17.7468	17.694	17.6869	17.7418	17.3581	17.5763	17.5918	17.6125
20uM E2 vs. DMSO	Q38SD2	LRRK1	Leucine-rich repeat serine/threonine-protein kinase 1	0.171561	1.54311	17.8133	17.7107	17.6571	17.7343	17.7824	17.9335	17.8899	17.9958
20uM E2 vs. DMSO	P20339	RAB5A	Ras-related protein Rab-5A	0.351379	1.54236	19.6196	19.7049	19.2359	19.4984	19.561	19.9888	19.8213	20.0933
20uM E2 vs. DMSO	Q8TCT9	HM13	Minor histocompatibility antigen H13	0.399516	1.54008	16.8866	17.0712	17.0444	17.3122	17.1763	17.321	17.5475	17.8677
20uM E2 vs. DMSO	Q9UJY1	HSPB8	Heat shock protein beta-8	-0.334262	1.53959	16.3419	16.3987	16.287	16.0798	15.8113	16.1939	15.6871	16.0781
20uM E2 vs. DMSO	Q13885	TUBB2A	Tubulin beta-2A chain	-0.240699	1.53861	21.8816	21.8488	22.0484	22.166	21.9211	21.5897	21.7327	21.7385
20uM E2 vs. DMSO	Q14135	VGLL4	Transcription cofactor vestigial-like protein 4	0.67701	1.53779	13.3134	13.1023	12.755	14.0392	14.1085	13.7674	13.8981	14.1441
20uM E2 vs. DMSO	O94842	TOX4	TOX high mobility group box family member 4	0.173002	1.53576	17.1118	17.0288	17.116	17.156	17.1972	17.2741	17.2331	17.4002
20uM E2 vs. DMSO	P12236	SLC25A6	ADP/ATP translocase 3	0.655812	1.53542	17.0981	17.6507	17.4846	17.4888	17.644	17.7014	18.1706	18.8296
20uM E2 vs. DMSO	Q96IU4	ABHD14B	Putative protein-lysine deacylase ABHD14B	0.181077	1.53475	17.7229	17.7725	17.8564	17.8719	17.8333	18.0208	18.0418	18.0521
20uM E2 vs. DMSO	Q5VUA4	ZNF318	Zinc finger protein 318	1.19813	1.53409	15.0462	15.0067	13.2056	13.2604	15.3834	15.6769	15.409	14.8421
20uM E2 vs. DMSO	P08729	KRT7	Keratin, type II cytoskeletal 7	0.243065	1.53246	23.8319	23.8181	23.8662	23.7548	23.9697	24.348	23.9173	24.0083
20uM E2 vs. DMSO	Q8N2K0	ABHD12	Lysophosphatidylserine lipase ABHD12	0.419691	1.53231	13.5077	13.3659	13.0564	13.2515	13.4115	13.765	13.8924	13.7914
20uM E2 vs. DMSO	P43686	PSMC4	26S proteasome regulatory subunit 6B	0.257157	1.53187	21.9202	21.7179	21.5282	21.6263	21.8584	22.048	21.8126	22.1022
20uM E2 vs. DMSO	Q13503	MED21	Mediator of RNA polymerase II transcription subunit 21	-0.255376	1.53112	14.6018	14.5479	14.5628	14.6498	14.1902	14.4164	14.3958	14.3384
20uM E2 vs. DMSO	O60281	ZNF292	Zinc finger protein 292	0.382319	1.53094	15.1721	15.04	14.5835	14.9141	15.1826	15.4859	15.14	15.4303
20uM E2 vs. DMSO	Q9Y2I9	TBC1D30	TBC1 domain family member 30	-0.363167	1.53053	15.4189	15.3269	15.264	15.2424	14.616	14.8342	15.1576	15.1918
20uM E2 vs. DMSO	Q9BY77	POLDIP3	Polymerase delta-interacting protein 3	-0.190618	1.52962	15.7172	15.6216	15.7347	15.7086	15.5149	15.4348	15.5122	15.5577
20uM E2 vs. DMSO	Q9H7E9	C8orf33	UPF0488 protein C8orf33	-0.238066	1.52933	16.4449	16.367	16.34	16.6164	16.1269	16.2147	16.365	16.1095
20uM E2 vs. DMSO	Q15369	ELOC	Elongin-C	0.221925	1.52931	19.042	19.0556	18.7389	18.9557	19.0204	19.1998	19.1951	19.2647
20uM E2 vs. DMSO	P24593	IGFBP5	Insulin-like growth factor-binding protein 5	0.293858	1.52913	19.3782	19.0908	19.1278	19.3227	19.3582	19.5131	19.3985	19.8252
20uM E2 vs. DMSO	Q04724	TLE1	Transducin-like enhancer protein 1	-0.204456	1.52884	18.3429	18.4214	18.2187	18.3972	17.9906	18.0888	18.2003	18.2827
20uM E2 vs. DMSO	Q9H5H4	ZNF768	Zinc finger protein 768	-0.5197	1.52854	14.8385	14.6523	14.919	14.8447	14.6691	13.7031	14.5098	14.2938
20uM E2 vs. DMSO	P26639	TARS1	Threonine--tRNA ligase 1, cytoplasmic	0.176813	1.52809	20.4941	20.3853	20.3116	20.3464	20.4277	20.5993	20.5336	20.6841
20uM E2 vs. DMSO	Q14696	MESD	LRP chaperone MESD	0.279937	1.52569	17.7404	17.527	17.5315	17.432	17.64	17.8475	17.7628	18.1004
20uM E2 vs. DMSO	Q9H0W9	C11orf54	Ester hydrolase C11orf54	0.195208	1.52533	18.3286	18.2149	18.1325	18.1693	18.3076	18.3249	18.4254	18.5683
20uM E2 vs. DMSO	Q13322	GRB10	Growth factor receptor-bound protein 10	-0.304457	1.52369	16.3004	16.1988	16.2928	16.2172	15.8682	16.0871	15.652	16.1841
20uM E2 vs. DMSO	O00566	MPHOSPH10	U3 small nucleolar ribonucleoprotein protein MPP10	-0.440977	1.52331	13.1473	12.9776	13.2227	13.0977	12.9044	12.3379	12.7719	12.6673
20uM E2 vs. DMSO	Q8NFI3	ENGASE	Cytosolic endo-beta-N-acetylglucosaminidase	-0.311981	1.52202	14.3623	14.1958	14.4532	14.265	13.8811	14.0666	13.8944	14.1863
20uM E2 vs. DMSO	Q9UNK9	ANGEL1	Protein angel homolog 1	0.459263	1.522	14.0487	13.7692	14.486	14.4621	14.739	14.4568	14.7654	14.6419
20uM E2 vs. DMSO	O94887	FARP2	FERM, ARHGEF and pleckstrin domain-containing protein 2	-0.469954	1.5218	12.3766	12.8079	12.3899	12.5273	12.0294	12.1034	11.9215	12.1675
20uM E2 vs. DMSO	O94973	AP2A2	AP-2 complex subunit alpha-2	0.152678	1.52117	18.7234	18.6163	18.6421	18.5695	18.6937	18.8112	18.7859	18.8712
20uM E2 vs. DMSO	P11310	ACADM	Medium-chain specific acyl-CoA dehydrogenase, mitochondrial	0.253318	1.51997	18.3487	18.2392	18.2223	18.0726	18.4037	18.3621	18.3903	18.7399
20uM E2 vs. DMSO	Q9Y657	SPIN1	Spindlin-1	-0.265909	1.51809	15.6273	15.5439	15.4324	15.5107	15.0956	15.18	15.4724	15.3027
20uM E2 vs. DMSO	Q13137	CALCOCO2	Calcium-binding and coiled-coil domain-containing protein 2	0.187983	1.51717	16.3538	16.4082	16.489	16.4545	16.5761	16.6373	16.5106	16.7335
20uM E2 vs. DMSO	Q13363	CTBP1	C-terminal-binding protein 1	-0.194654	1.51706	19.7141	19.528	19.4765	19.4426	19.3	19.4169	19.2358	19.43
20uM E2 vs. DMSO	Q5JRA6	MIA3	Transport and Golgi organization protein 1 homolog	0.512902	1.51666	15.5011	15.1274	15.3561	15.3436	15.6372	15.378	16.3442	16.0204
20uM E2 vs. DMSO	P51148	RAB5C	Ras-related protein Rab-5C	0.351328	1.51594	17.9285	17.9296	17.6465	17.8036	17.8129	18.3277	18.1209	18.452
20uM E2 vs. DMSO	P18440	NAT1	Arylamine N-acetyltransferase 1	-0.168514	1.51511	17.6553	17.6571	17.5937	17.5948	17.3101	17.5066	17.5311	17.479
20uM E2 vs. DMSO	Q7Z7H5	TMED4	Transmembrane emp24 domain-containing protein 4	0.346488	1.51398	15.3287	15.1169	15.2666	15.3039	15.5358	15.7602	15.8451	15.2608
20uM E2 vs. DMSO	Q96FV2	SCRN2	Secernin-2	0.255468	1.51367	16.3494	16.1896	15.9807	16.0704	16.3059	16.5506	16.4147	16.3408
20uM E2 vs. DMSO	Q8N531	FBXL6	F-box/LRR-repeat protein 6	-0.278813	1.51202	14.381	14.4472	14.4641	14.4376	14.1056	14.3597	14.0459	14.1034
20uM E2 vs. DMSO	O43143	DHX15	ATP-dependent RNA helicase DHX15	-0.163166	1.51138	20.1903	19.9471	20.0289	20.0866	19.8154	19.9222	19.9039	19.9587
20uM E2 vs. DMSO	Q9NWU5	MRPL22	Large ribosomal subunit protein uL22m	0.363171	1.51115	17.7746	17.3371	17.1651	17.4366	17.8389	17.5657	17.7361	18.0253
20uM E2 vs. DMSO	Q99717	SMAD5	Mothers against decapentaplegic homolog 5	-0.352891	1.51113	14.7693	14.4775	14.5143	14.643	14.2187	14.4491	14.3708	13.9539
20uM E2 vs. DMSO	Q3LXA3	TKFC	Triokinase/FMN cyclase	0.133807	1.51107	19.4079	19.4344	19.3666	19.3883	19.4255	19.5561	19.5782	19.5724
20uM E2 vs. DMSO	P13796	LCP1	Plastin-2	-0.182604	1.51102	18.772	18.5829	18.579	18.6608	18.4337	18.5625	18.3384	18.5296
20uM E2 vs. DMSO	P78371	CCT2	T-complex protein 1 subunit beta	0.124769	1.50834	20.5835	20.5457	20.4823	20.555	20.6108	20.7266	20.6326	20.6957
20uM E2 vs. DMSO	P45880	VDAC2	Voltage-dependent anion-selective channel protein 2	0.513957	1.50669	15.0808	15.5642	15.2485	15.6007	15.5449	15.5857	16.1124	16.307
20uM E2 vs. DMSO	Q9BTU6	PI4K2A	Phosphatidylinositol 4-kinase type 2-alpha	0.443343	1.50629	12.284	12.3556	12.4056	12.7607	12.8439	12.8207	12.8303	13.0844
20uM E2 vs. DMSO	Q92576	PHF3	PHD finger protein 3	-0.320672	1.50501	15.7855	15.7007	15.428	15.294	15.2815	15.2474	15.0877	15.3089
20uM E2 vs. DMSO	Q9BVG4	PBDC1	Protein PBDC1	0.189215	1.50472	18.9012	18.7561	18.6488	18.7413	18.8191	18.9856	18.9371	19.0625
20uM E2 vs. DMSO	Q96MG8	PCMTD1	Protein-L-isoaspartate O-methyltransferase domain-containing protein 1	0.763393	1.50403	15.2996	15.5776	14.3786	15.9273	16.1398	16.3469	15.8937	15.8564
20uM E2 vs. DMSO	P15313	ATP6V1B1	V-type proton ATPase subunit B, kidney isoform	0.19617	1.50352	19.5652	19.384	19.3591	19.4328	19.5546	19.6146	19.5409	19.8156
20uM E2 vs. DMSO	Q00610	CLTC	Clathrin heavy chain 1	0.144429	1.50335	23.0886	23.048	23.0053	23.0832	23.1424	23.2451	23.1176	23.2975
20uM E2 vs. DMSO	Q92685	ALG3	Dol-P-Man:Man(5)GlcNAc(2)-PP-Dol alpha-1,3-mannosyltransferase	0.815912	1.50275	11.0667	12.5717	12.0579	12.028	12.509	12.9224	12.5626	12.9939
20uM E2 vs. DMSO	Q9NUM4	TMEM106B	Transmembrane protein 106B	0.345262	1.50235	17.6051	17.1256	17.2416	17.2357	17.3932	17.7035	17.5752	17.9171
20uM E2 vs. DMSO	O75143	ATG13	Autophagy-related protein 13	0.351643	1.50153	12.9744	13.002	13.111	13.3025	13.3491	13.4294	13.4656	13.5525
20uM E2 vs. DMSO	Q58WW2	DCAF6	DDB1- and CUL4-associated factor 6	0.554516	1.50118	14.7552	15.6023	15.3508	15.0729	15.6817	15.6889	15.4117	16.2168
20uM E2 vs. DMSO	Q8NFD5	ARID1B	AT-rich interactive domain-containing protein 1B	-0.28705	1.49954	15.9158	15.9514	15.9855	15.9925	15.5819	15.6819	15.9743	15.459
20uM E2 vs. DMSO	Q9UNH6	SNX7	Sorting nexin-7	-0.411353	1.49828	14.3124	14.7862	14.2301	14.669	13.8811	14.2712	14.0098	14.1902
20uM E2 vs. DMSO	P63151	PPP2R2A	Serine/threonine-protein phosphatase 2A 55 kDa regulatory subunit B alpha isoform	0.185375	1.49819	18.2109	18.0229	18.0453	18.0616	18.1578	18.3935	18.2059	18.3251
20uM E2 vs. DMSO	Q92817	EVPL	Envoplakin	-0.546774	1.4975	17.2497	17.2118	16.8306	16.8634	15.8311	16.6283	16.6845	16.8245
20uM E2 vs. DMSO	Q9P1Y5	CAMSAP3	Calmodulin-regulated spectrin-associated protein 3	-0.246263	1.49711	16.8141	16.6388	16.6381	16.5811	16.2512	16.4305	16.3706	16.6347
20uM E2 vs. DMSO	Q9H8V3	ECT2	Protein ECT2	-1.20914	1.49632	15.7733	15.9191	15.8017	16.2791	15.0932	14.3473	16.0522	13.4439
20uM E2 vs. DMSO	Q9UK53	ING1	Inhibitor of growth protein 1	-0.393539	1.49574	13.7152	13.5385	13.2853	13.6245	13.1088	13.356	12.96	13.1646
20uM E2 vs. DMSO	Q04756	HGFAC	Hepatocyte growth factor activator	0.611433	1.49529	12.6809	13.1329	12.9215	13.0643	13.5457	13.9488	13.8348	12.9161
20uM E2 vs. DMSO	Q8NCA5	FAM98A	Protein FAM98A	0.147835	1.49506	16.8216	16.8632	16.8204	16.9264	17.0294	16.9763	16.9826	17.0347
20uM E2 vs. DMSO	A4D1E9	GTPBP10	GTP-binding protein 10	0.293578	1.49503	14.9125	15.09	15.118	14.9891	15.3971	15.1367	15.1944	15.5558
20uM E2 vs. DMSO	P43487	RANBP1	Ran-specific GTPase-activating protein	-0.195117	1.49434	20.0314	19.9062	19.9515	19.8449	19.5708	19.8281	19.6859	19.8687
20uM E2 vs. DMSO	P46020	PHKA1	Phosphorylase b kinase regulatory subunit alpha, skeletal muscle isoform	0.253202	1.49077	15.8628	16.0901	15.851	15.8574	15.9461	16.2616	16.2266	16.2399
20uM E2 vs. DMSO	P49959	MRE11	Double-strand break repair protein MRE11	-0.255298	1.49001	18.4386	18.2092	18.1548	18.196	17.9436	18.1885	17.7797	18.0657
20uM E2 vs. DMSO	Q9Y371	SH3GLB1	Endophilin-B1	0.217448	1.4886	16.5442	16.7401	16.7038	16.6664	16.701	16.8825	17.0296	16.9111
20uM E2 vs. DMSO	Q6AI08	HEATR6	HEAT repeat-containing protein 6	-0.243953	1.48812	17.2957	17.4576	17.2685	17.3661	16.8574	17.1297	17.285	17.1399
20uM E2 vs. DMSO	P30153	PPP2R1A	Serine/threonine-protein phosphatase 2A 65 kDa regulatory subunit A alpha isoform	0.163752	1.4873	20.4132	20.3574	20.5265	20.3864	20.4448	20.6234	20.5962	20.6741
20uM E2 vs. DMSO	Q9Y4F1	FARP1	FERM, ARHGEF and pleckstrin domain-containing protein 1	-0.226513	1.48581	15.4505	15.2877	15.1988	15.2974	15.0802	15.1515	14.9924	15.1043
20uM E2 vs. DMSO	Q9UKK6	NXT1	NTF2-related export protein 1	-0.297182	1.48555	16.147	16.0754	16.1385	16.0842	15.7139	16.0857	15.5417	15.915
20uM E2 vs. DMSO	Q9Y2G5	POFUT2	GDP-fucose protein O-fucosyltransferase 2	0.339592	1.48519	13.7648	14.0175	13.846	14.0714	14.0603	14.2284	14.2782	14.4912
20uM E2 vs. DMSO	Q9H1Z4	WDR13	WD repeat-containing protein 13	0.177064	1.48443	16.8586	16.9045	16.6933	16.8632	16.9336	17.0097	17.0064	17.0782
20uM E2 vs. DMSO	Q96RP9	GFM1	Elongation factor G, mitochondrial	0.279114	1.48435	18.8656	18.8103	18.6543	18.6356	18.9695	18.8628	18.9097	19.3402
20uM E2 vs. DMSO	Q92688	ANP32B	Acidic leucine-rich nuclear phosphoprotein 32 family member B	-0.157428	1.48408	20.8523	20.7477	20.667	20.692	20.5669	20.606	20.4799	20.6766
20uM E2 vs. DMSO	P22307	SCP2	Sterol carrier protein 2	0.497645	1.48091	19.5092	19.4	19.9509	19.3204	20.3314	19.6949	19.7517	20.393
20uM E2 vs. DMSO	Q4VC31	MIX23	Protein MIX23	0.20114	1.48069	17.7659	17.4813	17.7055	17.5864	17.7445	17.8696	17.7859	17.9437
20uM E2 vs. DMSO	Q3B726	POLR1F	DNA-directed RNA polymerase I subunit RPA43	-0.183739	1.47904	15.8231	15.821	15.7303	15.8461	15.5519	15.607	15.6408	15.6858
20uM E2 vs. DMSO	Q96G46	DUS3L	tRNA-dihydrouridine(47) synthase [NAD(P)(+)]-like	-0.301192	1.47868	15.8515	15.4839	15.6583	15.6095	15.2285	15.2968	15.2572	15.6159
20uM E2 vs. DMSO	Q13572	ITPK1	Inositol-tetrakisphosphate 1-kinase	-0.163534	1.47768	18.0829	18.303	18.1951	18.2279	18.1324	18.011	18.0256	17.9858
20uM E2 vs. DMSO	Q8N398	VWA5B2	von Willebrand factor A domain-containing protein 5B2	-0.411819	1.4766	15.2059	15.3621	15.0908	15.4924	14.9474	14.5246	15.2475	14.7844
20uM E2 vs. DMSO	P60002	ELOF1	Transcription elongation factor 1 homolog	0.152424	1.47642	17.717	17.7463	17.5832	17.623	17.7831	17.8121	17.891	17.7929
20uM E2 vs. DMSO	Q8N8R7	ARL14EP	ARL14 effector protein	-0.681488	1.47606	12.6959	13.1227	12.9731	13.2091	12.6865	12.264	12.708	11.6163
20uM E2 vs. DMSO	P00338	LDHA	L-lactate dehydrogenase A chain	0.245721	1.47453	22.8975	23.0192	23.0371	22.9442	22.9226	23.3241	23.2624	23.3718
20uM E2 vs. DMSO	P10600	TGFB3	Transforming growth factor beta-3 proprotein	-0.933958	1.47326	15.4097	15.4607	15.4388	14.2366	13.8078	14.9178	14.5362	13.5482
20uM E2 vs. DMSO	P48643	CCT5	T-complex protein 1 subunit epsilon	0.149143	1.47326	20.4508	20.3912	20.4106	20.4881	20.4717	20.6114	20.5511	20.703
20uM E2 vs. DMSO	Q8TEP8	CEP192	Centrosomal protein of 192 kDa	-0.696831	1.47248	14.0272	13.9834	13.8364	14.0162	13.4588	13.7753	13.4599	12.3819
20uM E2 vs. DMSO	Q8NFP9	NBEA	Neurobeachin	0.278682	1.47153	15.755	15.721	15.6685	15.6358	15.6957	15.926	16.1053	16.168
20uM E2 vs. DMSO	Q9H7L9	SUDS3	Sin3 histone deacetylase corepressor complex component SDS3	-0.16475	1.46914	16.548	16.496	16.4334	16.4723	16.323	16.4022	16.2604	16.3051
20uM E2 vs. DMSO	Q96SB4	SRPK1	SRSF protein kinase 1	0.293041	1.46903	17.062	17.068	16.7436	16.6901	16.9756	17.2578	17.1791	17.3235
20uM E2 vs. DMSO	P30044	PRDX5	Peroxiredoxin-5, mitochondrial	0.216728	1.46891	23.0106	22.9433	22.8643	22.8585	23.036	23.0805	23.04	23.387
20uM E2 vs. DMSO	O75964	ATP5MG	ATP synthase subunit g, mitochondrial	1.32339	1.46862	12.7088	14.7119	13.3732	12.9944	13.8043	14.822	14.5238	15.9319
20uM E2 vs. DMSO	Q15648	MED1	Mediator of RNA polymerase II transcription subunit 1	-0.181809	1.46843	18.8363	18.7856	18.7193	18.7869	18.4824	18.5654	18.5631	18.79
20uM E2 vs. DMSO	P49821	NDUFV1	NADH dehydrogenase [ubiquinone] flavoprotein 1, mitochondrial	0.310946	1.4683	15.9947	15.8325	15.8171	15.9526	16.206	15.9851	16.0985	16.5511
20uM E2 vs. DMSO	P61964	WDR5	WD repeat-containing protein 5	-0.156206	1.46822	18.0476	17.8748	17.8277	17.9263	17.7376	17.7743	17.7389	17.8007
20uM E2 vs. DMSO	Q9NUQ7	UFSP2	Ufm1-specific protease 2	-0.35505	1.46599	14.4252	14.5054	14.3243	14.5152	13.8402	14.1694	14.395	13.9453
20uM E2 vs. DMSO	P42025	ACTR1B	Beta-centractin	0.223797	1.4648	19.1344	18.9082	18.7893	18.8191	18.9908	19.1936	19.1208	19.2409
20uM E2 vs. DMSO	Q9BWU1	CDK19	Cyclin-dependent kinase 19	-0.304068	1.46432	15.3697	15.0979	15.0745	15.0097	14.8208	15.0428	14.6458	14.826
20uM E2 vs. DMSO	P49069	CAMLG	Guided entry of tail-anchored proteins factor CAMLG	-1.28417	1.46139	13.0877	13.8767	14.6955	14.922	13.6369	11.7677	13.496	12.5446
20uM E2 vs. DMSO	Q7Z7F7	MRPL55	Large ribosomal subunit protein mL55	0.358316	1.45907	14.0316	14.4549	14.3243	14.2039	14.8272	14.632	14.3282	14.6606
20uM E2 vs. DMSO	P39023	RPL3	Large ribosomal subunit protein uL3	0.14107	1.45889	19.7158	19.666	19.6397	19.7864	19.7441	19.8825	19.9031	19.8425
20uM E2 vs. DMSO	Q16851	UGP2	UTP--glucose-1-phosphate uridylyltransferase	0.327009	1.45769	19.2803	19.0231	18.7133	19.0292	19.0951	19.3721	19.329	19.5577
20uM E2 vs. DMSO	O95685	PPP1R3D	Protein phosphatase 1 regulatory subunit 3D	0.30797	1.45646	15.0782	15.1119	15.2675	15.3198	15.1835	15.6359	15.6195	15.5704
20uM E2 vs. DMSO	Q9Y679	AUP1	Lipid droplet-regulating VLDL assembly factor AUP1	0.519844	1.45629	13.6515	13.6724	13.0687	13.997	13.8706	14.1067	14.3882	14.1034
20uM E2 vs. DMSO	Q9Y3C1	NOP16	Nucleolar protein 16	-0.655016	1.4561	17.5285	17.3639	16.3717	16.4158	16.2173	16.1597	16.2882	16.3945
20uM E2 vs. DMSO	P49796	RGS3	Regulator of G-protein signaling 3	0.605977	1.45593	13.6101	14.8761	14.2781	13.9997	14.7196	14.6577	14.9514	14.8593
20uM E2 vs. DMSO	Q5W0V3	FHIP2A	FHF complex subunit HOOK interacting protein 2A	-0.255477	1.45567	15.9663	15.8829	15.7863	15.9375	15.6229	15.4363	15.6296	15.8623
20uM E2 vs. DMSO	Q8N1B4	VPS52	Vacuolar protein sorting-associated protein 52 homolog	0.32156	1.45534	16.5854	17.0751	17.0896	17.0324	17.0973	17.2808	17.225	17.4657
20uM E2 vs. DMSO	A5YM69	ARHGEF35	Rho guanine nucleotide exchange factor 35	0.978549	1.45523	10.7257	10.9575	10.8284	11.7435	11.0394	12.3445	12.2286	12.5568
20uM E2 vs. DMSO	Q9UQ13	SHOC2	Leucine-rich repeat protein SHOC-2	-0.205631	1.45411	15.6149	15.5607	15.5882	15.6798	15.3571	15.2883	15.4811	15.4944
20uM E2 vs. DMSO	Q13151	HNRNPA0	Heterogeneous nuclear ribonucleoprotein A0	-0.166439	1.45188	19.2374	18.9697	19.033	19.0062	18.9067	18.9405	18.8795	18.8538
20uM E2 vs. DMSO	P43034	PAFAH1B1	Platelet-activating factor acetylhydrolase IB subunit beta	0.209761	1.45073	18.4382	18.3065	18.157	18.2523	18.3804	18.4999	18.4367	18.676
20uM E2 vs. DMSO	Q70EL2	USP45	Ubiquitin carboxyl-terminal hydrolase 45	0.264856	1.45018	17.3017	17.1027	16.9078	16.8661	17.2154	17.3193	17.2491	17.454
20uM E2 vs. DMSO	Q12905	ILF2	Interleukin enhancer-binding factor 2	-0.147333	1.44959	21.1563	21.2101	21.1203	21.1044	20.8848	20.9583	21.0935	21.0652
20uM E2 vs. DMSO	Q9NRD1	FBXO6	F-box only protein 6	0.411051	1.44871	14.7722	15.2171	14.7164	14.9857	14.9239	15.5096	15.4317	15.4705
20uM E2 vs. DMSO	Q5HYJ3	FAM76B	Protein FAM76B	-0.441814	1.44646	15.1648	14.9253	14.9352	14.984	14.8786	14.4516	14.8237	14.0883
20uM E2 vs. DMSO	Q6P587	FAHD1	Acylpyruvase FAHD1, mitochondrial	0.309603	1.44641	17.6456	17.2738	17.2429	17.1968	17.5496	17.5856	17.536	17.9263
20uM E2 vs. DMSO	Q9BQG2	NUDT12	NAD-capped RNA hydrolase NUDT12	0.268878	1.446	15.2658	15.1544	15.2059	15.0047	15.2928	15.4805	15.3011	15.6319
20uM E2 vs. DMSO	Q96F86	EDC3	Enhancer of mRNA-decapping protein 3	0.445904	1.4459	19.8305	19.5254	19.2156	19.1162	19.698	19.7959	19.7056	20.2719
20uM E2 vs. DMSO	Q9Y312	AAR2	Protein AAR2 homolog	-0.284814	1.44534	16.9351	16.9596	16.7836	16.7705	16.5953	16.8548	16.5497	16.3098
20uM E2 vs. DMSO	Q9H8Y5	ANKZF1	tRNA endonuclease ANKZF1	0.247111	1.44523	15.5484	15.3791	15.2321	15.3817	15.5111	15.5957	15.629	15.7938
20uM E2 vs. DMSO	P15735	PHKG2	Phosphorylase b kinase gamma catalytic chain, liver/testis isoform	0.201257	1.44497	16.7059	16.6299	16.5391	16.5786	16.6646	16.7805	16.9665	16.8469
20uM E2 vs. DMSO	Q96PC3	AP1S3	AP-1 complex subunit sigma-3	-0.559387	1.44473	14.4664	14.8229	15.0939	14.942	14.5923	14.3603	14.4905	13.6447
20uM E2 vs. DMSO	Q9UBR2	CTSZ	Cathepsin Z	0.178602	1.44353	18.1394	18.1997	18.1016	18.0471	18.2179	18.2268	18.2811	18.4763
20uM E2 vs. DMSO	Q70CQ2	USP34	Ubiquitin carboxyl-terminal hydrolase 34	0.190034	1.44317	16.0713	16.0994	16.1569	16.1897	16.1858	16.3463	16.3075	16.4378
20uM E2 vs. DMSO	O75116	ROCK2	Rho-associated protein kinase 2	-0.175553	1.44274	16.8025	16.6429	16.6313	16.6925	16.4595	16.5876	16.4493	16.5706
20uM E2 vs. DMSO	O43427	FIBP	Acidic fibroblast growth factor intracellular-binding protein	-0.275461	1.44051	15.6817	15.5864	15.4981	15.631	15.0583	15.5045	15.4335	15.2992
20uM E2 vs. DMSO	Q9UI09	NDUFA12	NADH dehydrogenase [ubiquinone] 1 alpha subcomplex subunit 12	1.04403	1.44019	9.92578	10.3984	9.80674	10.4933	11.2217	10.2601	11.2446	12.0739
20uM E2 vs. DMSO	Q5SVZ6	ZMYM1	Zinc finger MYM-type protein 1	-0.715067	1.43854	13.0731	12.9758	13.2465	13.0006	11.4669	12.7935	12.6227	12.5528
20uM E2 vs. DMSO	Q8NBJ7	SUMF2	Inactive C-alpha-formylglycine-generating enzyme 2	0.189195	1.43812	19.1087	18.9935	18.937	18.9839	19.0803	19.1235	19.186	19.3901
20uM E2 vs. DMSO	Q9H4K7	MTG2	Mitochondrial ribosome-associated GTPase 2	-0.580377	1.43779	14.4667	14.5375	14.3902	14.3119	13.694	13.7593	14.5682	13.3634
20uM E2 vs. DMSO	Q13555	CAMK2G	Calcium/calmodulin-dependent protein kinase type II subunit gamma	0.252982	1.43752	16.8876	16.7178	16.4986	16.6038	16.896	16.8699	16.8339	17.12
20uM E2 vs. DMSO	Q9H814	PHAX	Phosphorylated adapter RNA export protein	0.2403	1.43705	17.9461	17.6844	17.6515	17.6066	17.8028	17.8924	18.1029	18.0518
20uM E2 vs. DMSO	Q9C0B1	FTO	Alpha-ketoglutarate-dependent dioxygenase FTO	-0.285561	1.43444	17.5294	17.5526	17.3308	17.4359	17.0795	17.1379	16.979	17.51
20uM E2 vs. DMSO	Q9Y605	MRFAP1	MORF4 family-associated protein 1	0.272327	1.43428	15.1874	15.1776	15.2222	15.357	15.7903	15.3909	15.4261	15.4263
20uM E2 vs. DMSO	Q96IZ7	RSRC1	Serine/Arginine-related protein 53	-0.577457	1.43366	15.4975	14.6632	15.0826	15.026	14.3295	15.0265	14.5413	14.0621
20uM E2 vs. DMSO	O94806	PRKD3	Serine/threonine-protein kinase D3	-1.36403	1.43312	15.611	15.5143	14.9561	14.5136	15.3377	14.0961	12.5296	13.1756
20uM E2 vs. DMSO	O00116	AGPS	Alkyldihydroxyacetonephosphate synthase, peroxisomal	0.649825	1.43216	15.1244	15.5352	15.2144	14.2368	15.9888	15.48	15.4418	15.7996
20uM E2 vs. DMSO	P15170	GSPT1	Eukaryotic peptide chain release factor GTP-binding subunit ERF3A	0.203106	1.43213	19.6985	19.4662	19.546	19.5207	19.6011	19.869	19.6811	19.8927
20uM E2 vs. DMSO	Q9H0J9	PARP12	Protein mono-ADP-ribosyltransferase PARP12	0.418943	1.43194	14.7175	14.1739	14.9197	14.8382	14.9283	15.0669	15.0574	15.2725
20uM E2 vs. DMSO	Q8WVX9	FAR1	Fatty acyl-CoA reductase 1	1.27132	1.43193	10.6321	11.6616	11.8842	10.0357	11.8196	11.9286	12.076	13.4747
20uM E2 vs. DMSO	Q9BUB5	MKNK1	MAP kinase-interacting serine/threonine-protein kinase 1	0.394292	1.43173	14.9502	14.8648	14.3211	14.5667	14.9564	15.1124	14.911	15.3001
20uM E2 vs. DMSO	P25686	DNAJB2	DnaJ homolog subfamily B member 2	0.23987	1.43127	15.062	14.9679	15.1787	15.0646	15.1705	15.3921	15.4423	15.2278
20uM E2 vs. DMSO	P48147	PREP	Prolyl endopeptidase	0.149995	1.43094	19.0475	19.0274	18.9479	19.0426	19.1204	19.1284	19.1055	19.3111
20uM E2 vs. DMSO	Q9H9S4	CAB39L	Calcium-binding protein 39-like	0.14628	1.4296	18.3266	18.386	18.3507	18.283	18.3655	18.4698	18.5566	18.5396
20uM E2 vs. DMSO	Q9UI12	ATP6V1H	V-type proton ATPase subunit H	0.150746	1.4295	17.8451	17.8851	17.8232	17.7377	17.8666	18.0014	18.0397	17.9863
20uM E2 vs. DMSO	Q8IWY9	CDAN1	Codanin-1	-0.31169	1.42915	15.197	14.9307	14.9982	15.2814	14.5253	14.8966	14.8371	14.9015
20uM E2 vs. DMSO	O95985	TOP3B	DNA topoisomerase 3-beta-1	-0.557943	1.42814	16.2782	15.0979	15.5	15.5991	14.875	15.0628	15.0034	15.3021
20uM E2 vs. DMSO	Q8IWB7	WDFY1	WD repeat and FYVE domain-containing protein 1	-0.182154	1.42651	16.718	16.6848	16.5674	16.5239	16.3409	16.5095	16.4675	16.4476
20uM E2 vs. DMSO	Q9Y5J7	TIMM9	Mitochondrial import inner membrane translocase subunit Tim9	0.410583	1.42634	15.8576	15.4977	15.2539	15.1063	15.7627	15.6667	15.8568	16.0717
20uM E2 vs. DMSO	Q9BXJ8	TMEM120A	Ion channel TACAN	0.568044	1.4263	13.4408	12.5463	12.7779	12.4094	13.3516	13.4849	13.2064	13.4036
20uM E2 vs. DMSO	Q9BQ24	ZFYVE21	Zinc finger FYVE domain-containing protein 21	-0.438476	1.42586	15.4974	15.775	15.7189	15.952	15.392	14.7839	15.4262	15.5872
20uM E2 vs. DMSO	Q7Z434	MAVS	Mitochondrial antiviral-signaling protein	0.189005	1.42414	18.7342	18.5713	18.7272	18.6501	18.8477	18.7027	18.8555	19.0329
20uM E2 vs. DMSO	O94953	KDM4B	Lysine-specific demethylase 4B	0.349189	1.42337	16.379	16.8249	16.3959	16.0983	16.7747	16.8637	16.8286	16.6277
20uM E2 vs. DMSO	O95478	NSA2	Ribosome biogenesis protein NSA2 homolog	0.390539	1.42333	14.3816	13.7235	14.0052	14.3206	14.4408	14.4138	14.5206	14.6178
20uM E2 vs. DMSO	Q12834	CDC20	Cell division cycle protein 20 homolog	-1.01104	1.42266	13.0504	12.8091	12.5577	11.5325	12.0966	11.8906	10.7979	11.1203
20uM E2 vs. DMSO	O00471	EXOC5	Exocyst complex component 5	0.215191	1.42261	18.2117	18.0016	18.1198	17.9516	18.1484	18.2042	18.3304	18.4625
20uM E2 vs. DMSO	Q92599	SEPTIN8	Septin-8	-0.161396	1.42175	16.9577	16.9489	16.7924	16.9111	16.7157	16.6783	16.7815	16.7891
20uM E2 vs. DMSO	O60282	KIF5C	Kinesin heavy chain isoform 5C	0.929969	1.4209	11.9296	10.8369	12.0322	10.5291	12.5586	11.8938	12.258	12.3374
20uM E2 vs. DMSO	Q13835	PKP1	Plakophilin-1	0.724037	1.42078	12.8049	12.8413	12.6831	13.5799	13.3129	14.2442	13.2079	14.0403
20uM E2 vs. DMSO	Q9NQ48	LZTFL1	Leucine zipper transcription factor-like protein 1	-0.331525	1.42032	15.3636	15.1835	14.9702	14.8499	14.6454	14.9686	14.7039	14.7231
20uM E2 vs. DMSO	O75052	NOS1AP	Carboxyl-terminal PDZ ligand of neuronal nitric oxide synthase protein	-0.183412	1.41982	17.4199	17.2443	17.1914	17.1519	16.9853	17.1172	17.059	17.1125
20uM E2 vs. DMSO	O75486	SUPT3H	Transcription initiation protein SPT3 homolog	-0.412619	1.41949	13.4578	13.7284	13.9201	13.6742	13.3635	13.2614	13.541	12.9642
20uM E2 vs. DMSO	P08670	VIM	Vimentin	-1.01869	1.41943	16.8251	16.5334	16.5137	16.5402	14.8605	16.5785	16.2757	14.623
20uM E2 vs. DMSO	P30520	ADSS2	Adenylosuccinate synthetase isozyme 2	-0.172941	1.41871	20.1635	20.0216	19.9301	20.0475	19.7675	19.8177	19.8785	20.0072
20uM E2 vs. DMSO	P60709	ACTB	Actin, cytoplasmic 1	-0.161779	1.41792	26.4432	26.4109	26.2375	26.3387	26.1506	26.2149	26.1535	26.2642
20uM E2 vs. DMSO	Q5T7W0	ZNF618	Zinc finger protein 618	-1.01614	1.4176	13.0495	12.8799	12.8469	12.7353	10.613	12.3485	12.7402	11.7453
20uM E2 vs. DMSO	Q9H8Y8	GORASP2	Golgi reassembly-stacking protein 2	0.324884	1.41738	18.0346	18.0569	17.8711	17.8027	18.101	17.9746	18.4182	18.5711
20uM E2 vs. DMSO	P38117	ETFB	Electron transfer flavoprotein subunit beta	0.282913	1.41633	20.6826	20.6669	20.4921	20.4387	20.7246	20.6966	20.7931	21.1977
20uM E2 vs. DMSO	P63279	UBE2I	SUMO-conjugating enzyme UBC9	-0.161125	1.41553	20.1358	19.9687	19.9613	19.9841	19.766	19.8314	19.8182	19.9898
20uM E2 vs. DMSO	P34897	SHMT2	Serine hydroxymethyltransferase, mitochondrial	0.277487	1.41404	20.0074	19.9832	19.909	19.8574	20.0077	20.0811	20.2101	20.5679
20uM E2 vs. DMSO	Q9NVA4	TMEM184C	Transmembrane protein 184C	-1.0819	1.41374	13.33	13.0209	13.3058	13.7774	12.1306	11.8225	13.6822	11.4711
20uM E2 vs. DMSO	P14868	DARS1	Aspartate--tRNA ligase, cytoplasmic	0.181895	1.41303	20.5776	20.3637	20.3316	20.3385	20.4616	20.6238	20.5594	20.6942
20uM E2 vs. DMSO	P42338	PIK3CB	Phosphatidylinositol 4,5-bisphosphate 3-kinase catalytic subunit beta isoform	0.582011	1.41223	14.3676	13.7033	14.7314	14.6838	14.6842	15.3079	14.9741	14.848
20uM E2 vs. DMSO	Q9H479	FN3K	Fructosamine-3-kinase	0.177317	1.41173	17.2187	17.0574	17.1533	17.1841	17.1927	17.3611	17.3188	17.45
20uM E2 vs. DMSO	P21912	SDHB	Succinate dehydrogenase [ubiquinone] iron-sulfur subunit, mitochondrial	0.620172	1.41062	13.6442	14.2202	13.556	13.6447	14.2861	13.7889	14.5222	14.9486
20uM E2 vs. DMSO	Q8WZA9	IRGQ	Immunity-related GTPase family Q protein	0.190423	1.41031	19.0587	19.1489	18.9746	18.9704	19.0462	19.3069	19.206	19.3552
20uM E2 vs. DMSO	P30049	ATP5F1D	ATP synthase subunit delta, mitochondrial	0.486997	1.41006	16.8528	16.6532	16.4925	16.1988	16.9675	17.032	16.6166	17.5292
20uM E2 vs. DMSO	Q9NW82	WDR70	WD repeat-containing protein 70	-0.19733	1.40989	18.0044	17.7973	17.7102	17.7972	17.5435	17.5498	17.683	17.7435
20uM E2 vs. DMSO	O00429	DNM1L	Dynamin-1-like protein	0.134555	1.40929	18.7368	18.6281	18.6175	18.6992	18.7253	18.8278	18.7919	18.8747
20uM E2 vs. DMSO	Q02338	BDH1	D-beta-hydroxybutyrate dehydrogenase, mitochondrial	0.476772	1.40909	14.3081	14.3915	14.4491	14.3663	14.8624	14.3546	14.8109	15.3942
20uM E2 vs. DMSO	Q9NQR4	NIT2	Omega-amidase NIT2	0.215222	1.40903	19.5627	19.4283	19.3027	19.3688	19.5045	19.5722	19.5903	19.8563
20uM E2 vs. DMSO	Q96DC9	OTUB2	Ubiquitin thioesterase OTUB2	0.588621	1.40898	11.8004	12.0625	12.63	12.2168	13.1173	12.5655	12.4546	12.9267
20uM E2 vs. DMSO	P06756	ITGAV	Integrin alpha-V	-0.692407	1.40854	15.0848	15.4991	15.3154	15.5267	14.7161	15.0427	13.756	15.1416
20uM E2 vs. DMSO	Q9BQC3	DPH2	2-(3-amino-3-carboxypropyl)histidine synthase subunit 2	-0.345131	1.40829	13.7395	13.9432	13.7178	13.7402	13.1618	13.4761	13.633	13.4892
20uM E2 vs. DMSO	Q13619	CUL4A	Cullin-4A	0.277646	1.4077	18.1371	17.9686	17.8729	17.8713	17.9313	18.3782	18.232	18.4189
20uM E2 vs. DMSO	P42785	PRCP	Lysosomal Pro-X carboxypeptidase	-0.218751	1.40729	17.6662	17.4517	17.4127	17.4144	17.1617	17.1986	17.2445	17.4652
20uM E2 vs. DMSO	Q8IYI6	EXOC8	Exocyst complex component 8	0.282569	1.40725	16.3676	16.2289	16.1967	16.4575	16.2801	16.6503	16.7144	16.7361
20uM E2 vs. DMSO	P50452	SERPINB8	Serpin B8	0.227912	1.40668	17.9527	17.7352	17.7782	17.7992	17.8078	18.1404	18.0263	18.2025
20uM E2 vs. DMSO	Q9Y4Y9	LSM5	U6 snRNA-associated Sm-like protein LSm5	-0.178696	1.40657	17.0116	16.9975	16.7998	16.9475	16.7048	16.7383	16.7267	16.8718
20uM E2 vs. DMSO	O94822	LTN1	E3 ubiquitin-protein ligase listerin	0.172161	1.40631	15.8378	15.7067	15.7204	15.7971	15.9014	15.9063	15.9496	15.9932
20uM E2 vs. DMSO	Q9H2W6	MRPL46	Large ribosomal subunit protein mL46	0.208031	1.40497	16.9767	16.8812	16.9624	16.9517	17.2426	16.9556	17.0916	17.3144
20uM E2 vs. DMSO	Q9H4G0	EPB41L1	Band 4.1-like protein 1	-0.602682	1.40496	14.3141	14.5791	14.1673	14.6676	13.6964	13.2277	13.9528	14.4405
20uM E2 vs. DMSO	Q9NS91	RAD18	E3 ubiquitin-protein ligase RAD18	-0.970974	1.40425	14.3465	14.438	13.7356	13.8879	14.2033	12.5185	13.4629	12.3394
20uM E2 vs. DMSO	O43933	PEX1	Peroxisomal ATPase PEX1	0.316803	1.40409	13.9864	14.1282	13.9699	13.8938	14.0187	14.4198	14.3592	14.4478
20uM E2 vs. DMSO	Q9UBV8	PEF1	Peflin	0.29311	1.40394	18.2449	18.4183	17.8793	18.2969	18.3136	18.476	18.5884	18.6339
20uM E2 vs. DMSO	P17405	SMPD1	Sphingomyelin phosphodiesterase	0.255973	1.40363	17.1191	17.1895	17.0095	17.0917	17.1065	17.3048	17.4069	17.6155
20uM E2 vs. DMSO	Q9Y6K9	IKBKG	NF-kappa-B essential modulator	0.437147	1.40248	16.8122	16.7121	16.7435	16.27	16.6842	17.3424	16.8957	17.364
20uM E2 vs. DMSO	O75531	BANF1	Barrier-to-autointegration factor	-0.276685	1.40202	20.3601	20.4153	20.0202	20.2046	19.8502	20.0598	19.7868	20.1966
20uM E2 vs. DMSO	Q9NQP4	PFDN4	Prefoldin subunit 4	-0.18013	1.40188	18.5781	18.4356	18.3102	18.3804	18.2967	18.3433	18.1959	18.1478
20uM E2 vs. DMSO	Q99436	PSMB7	Proteasome subunit beta type-7	0.215563	1.4017	20.4033	20.2338	20.1827	20.1051	20.2618	20.486	20.4258	20.6134
20uM E2 vs. DMSO	O00221	NFKBIE	NF-kappa-B inhibitor epsilon	0.532767	1.40161	19.0636	18.9332	17.9226	18.7485	19.0719	19.2049	19.2037	19.3184
20uM E2 vs. DMSO	Q9NUD5	ZCCHC3	Zinc finger CCHC domain-containing protein 3	-0.360719	1.40153	14.9481	15.0768	15.015	15.2058	14.8146	14.8684	14.2723	14.8476
20uM E2 vs. DMSO	Q9UBU8	MORF4L1	Mortality factor 4-like protein 1	-0.267573	1.40141	14.5675	14.6972	14.5687	14.509	14.4249	14.1519	14.4548	14.2404
20uM E2 vs. DMSO	Q9BTY7	HGH1	Protein HGH1 homolog	-0.142126	1.39981	18.2022	18.0831	18.0717	18.1009	17.9073	18.0602	17.9348	17.9872
20uM E2 vs. DMSO	Q6ZS17	RIPOR1	Rho family-interacting cell polarization regulator 1	-0.331934	1.3993	13.8632	13.6368	13.699	13.8215	13.1607	13.482	13.5229	13.5273
20uM E2 vs. DMSO	P09525	ANXA4	Annexin A4	0.198664	1.39899	20.0601	20.0318	19.8163	19.8274	20.1154	19.9806	20.1825	20.2518
20uM E2 vs. DMSO	O75151	PHF2	Lysine-specific demethylase PHF2	-0.937681	1.39858	13.0089	12.955	12.5606	14.5123	12.4474	12.17	12.5264	12.1422
20uM E2 vs. DMSO	O43159	RRP8	Ribosomal RNA-processing protein 8	0.280692	1.39835	16.5613	16.4155	16.2434	16.324	16.82	16.3777	16.6656	16.8036
20uM E2 vs. DMSO	P16383	GCFC2	Intron Large complex component GCFC2	-0.239854	1.39826	15.0252	14.9479	14.8111	14.9044	14.6033	14.5749	14.8097	14.7412
20uM E2 vs. DMSO	P49419	ALDH7A1	Alpha-aminoadipic semialdehyde dehydrogenase	0.189781	1.39619	20.804	20.8424	20.811	20.7872	20.8682	20.9524	20.9438	21.2393
20uM E2 vs. DMSO	Q6P9B9	INTS5	Integrator complex subunit 5	-0.209034	1.39562	16.3549	16.3047	16.4027	16.1239	16.113	16.1966	16.0608	15.9797
20uM E2 vs. DMSO	P63146	UBE2B	Ubiquitin-conjugating enzyme E2 B	-0.554141	1.39462	15.5668	15.4132	15.4143	16.0179	15.3727	15.3442	15.0638	14.4148
20uM E2 vs. DMSO	Q92979	EMG1	Ribosomal RNA small subunit methyltransferase NEP1	0.155802	1.39444	16.9939	16.9879	16.9327	16.9656	16.9944	17.1438	17.1896	17.1755
20uM E2 vs. DMSO	O75367	MACROH2A1	Core histone macro-H2A.1	0.285455	1.39439	18.5839	18.5721	18.295	18.5067	18.5547	18.7798	19.0924	18.6726
20uM E2 vs. DMSO	Q86T03	PIP4P1	Type 1 phosphatidylinositol 4,5-bisphosphate 4-phosphatase	0.427048	1.39322	14.4029	14.1053	14.1182	14.1024	14.5861	14.3109	14.4459	15.0941
20uM E2 vs. DMSO	Q9Y580	RBM7	RNA-binding protein 7	-0.313689	1.39307	15.9896	16.0928	15.8065	15.8765	15.5531	15.9852	15.5297	15.4427
20uM E2 vs. DMSO	Q9H2K0	MTIF3	Translation initiation factor IF-3, mitochondrial	0.544061	1.39303	13.8577	14.3084	13.1478	13.8465	14.2347	14.2175	14.4505	14.4339
20uM E2 vs. DMSO	Q14195	DPYSL3	Dihydropyrimidinase-related protein 3	-0.382216	1.39219	15.7197	15.8648	15.6617	15.4399	15.3449	14.8678	15.5692	15.3753
20uM E2 vs. DMSO	Q9NNX1	TUFT1	Tuftelin	-3.25408	1.39158	17.3497	16.4286	11.1897	16.2918	10.8192	11.3271	14.5536	11.5437
20uM E2 vs. DMSO	Q9BWS9	CHID1	Chitinase domain-containing protein 1	0.541241	1.39153	12.521	12.3289	11.7776	11.8513	12.462	12.5679	12.8523	12.7616
20uM E2 vs. DMSO	Q9Y6D6	ARFGEF1	Brefeldin A-inhibited guanine nucleotide-exchange protein 1	0.258591	1.39067	22.0641	21.6701	21.6731	21.7621	21.8422	22.145	22.0286	22.188
20uM E2 vs. DMSO	Q15363	TMED2	Transmembrane emp24 domain-containing protein 2	0.45038	1.39062	16.1883	16.9799	16.2282	16.1883	17.0571	16.6912	16.9543	16.6836
20uM E2 vs. DMSO	Q2NL82	TSR1	Pre-rRNA-processing protein TSR1 homolog	-0.247786	1.39034	15.2071	15.0652	15.1926	15.2648	14.9725	14.764	14.8859	15.1162
20uM E2 vs. DMSO	Q9H4A4	RNPEP	Aminopeptidase B	0.135552	1.38949	19.7922	19.7171	19.7294	19.7505	19.8114	19.8604	19.8452	20.0143
20uM E2 vs. DMSO	O75521	ECI2	Enoyl-CoA delta isomerase 2	0.180466	1.3889	18.8186	18.7413	18.7161	18.655	18.8111	18.9922	18.7892	19.0603
20uM E2 vs. DMSO	Q96CN7	ISOC1	Isochorismatase domain-containing protein 1	0.343598	1.38822	18.108	17.9167	17.7016	17.6819	17.9265	18.0953	18.221	18.5398
20uM E2 vs. DMSO	Q8NEF9	SRFBP1	Serum response factor-binding protein 1	-0.447977	1.38777	13.8387	13.8056	13.6547	13.4601	13.1323	12.8409	13.4917	13.5022
20uM E2 vs. DMSO	Q8TEB1	DCAF11	DDB1- and CUL4-associated factor 11	0.244492	1.38752	16.952	16.9701	16.5735	16.8657	16.9406	17.1015	17.1063	17.1911
20uM E2 vs. DMSO	P62304	SNRPE	Small nuclear ribonucleoprotein E	-0.16768	1.38726	19.7002	19.5268	19.6268	19.6356	19.413	19.33	19.4664	19.6093
20uM E2 vs. DMSO	Q7Z3B4	NUP54	Nucleoporin p54	-0.171148	1.38588	17.5916	17.6106	17.5667	17.513	17.2654	17.338	17.4674	17.5265
20uM E2 vs. DMSO	Q9NPB8	GPCPD1	Glycerophosphocholine phosphodiesterase GPCPD1	0.431785	1.38526	13.6774	13.5158	13.443	12.9437	13.6753	13.7895	13.81	14.0323
20uM E2 vs. DMSO	Q96DB5	RMDN1	Regulator of microtubule dynamics protein 1	0.17599	1.38489	18.9654	18.8047	18.8075	18.6941	18.9974	18.9244	18.9293	19.1245
20uM E2 vs. DMSO	Q9BZQ6	EDEM3	ER degradation-enhancing alpha-mannosidase-like protein 3	0.63615	1.3839	11.6084	12.3169	11.6618	11.9486	12.0541	12.8661	12.3238	12.8363
20uM E2 vs. DMSO	P49915	GMPS	GMP synthase [glutamine-hydrolyzing]	-0.165946	1.38379	20.6843	20.5022	20.5097	20.5247	20.3115	20.3232	20.3782	20.5442
20uM E2 vs. DMSO	O43747	AP1G1	AP-1 complex subunit gamma-1	0.142911	1.3833	19.5914	19.6156	19.5608	19.546	19.6853	19.8042	19.5938	19.8022
20uM E2 vs. DMSO	Q16740	CLPP	ATP-dependent Clp protease proteolytic subunit, mitochondrial	0.266701	1.38287	16.7105	16.654	16.6509	16.4368	16.7225	16.7009	16.979	17.1167
20uM E2 vs. DMSO	P55212	CASP6	Caspase-6	-0.146309	1.38262	19.9805	19.8633	19.7823	19.8588	19.6217	19.7432	19.7312	19.8035
20uM E2 vs. DMSO	O96019	ACTL6A	Actin-like protein 6A	-0.208251	1.38153	19.6436	19.4947	19.5027	19.4363	19.1263	19.3393	19.2603	19.5185
20uM E2 vs. DMSO	P11171	EPB41	Protein 4.1	1.30996	1.38143	10.3778	12.9208	12.9982	12.8014	13.6345	13.4018	13.4148	13.8869
20uM E2 vs. DMSO	Q16630	CPSF6	Cleavage and polyadenylation specificity factor subunit 6	-0.125203	1.37939	19.4244	19.3458	19.2602	19.2785	19.1749	19.1998	19.1997	19.2337
20uM E2 vs. DMSO	Q86SZ2	TRAPPC6B	Trafficking protein particle complex subunit 6B	0.212955	1.37877	16.9629	16.954	16.807	16.8525	16.9063	17.164	17.0778	17.2802
20uM E2 vs. DMSO	O75683	SURF6	Surfeit locus protein 6	-0.49593	1.37815	15.9167	15.8211	15.6549	16.0762	15.9112	14.9954	15.5541	15.0246
20uM E2 vs. DMSO	P43304	GPD2	Glycerol-3-phosphate dehydrogenase, mitochondrial	1.15949	1.37804	12.2739	12.4675	11.2739	10.4891	12.4002	12.1664	13.0463	13.5295
20uM E2 vs. DMSO	Q9NRP0	OSTC	Oligosaccharyltransferase complex subunit OSTC	0.721666	1.37735	13.6336	13.2609	13.0678	13.4124	13.479	13.6012	14.3349	14.8463
20uM E2 vs. DMSO	Q9Y248	GINS2	DNA replication complex GINS protein PSF2	-0.681044	1.37695	16.2975	16.0227	15.3091	16.5286	15.3065	15.6895	14.7918	15.6459
20uM E2 vs. DMSO	Q9BUJ2	HNRNPUL1	Heterogeneous nuclear ribonucleoprotein U-like protein 1	-0.145327	1.37528	19.2052	19.1937	19.0012	19.0954	18.9116	19.029	18.978	18.9956
20uM E2 vs. DMSO	Q8NFH3	NUP43	Nucleoporin Nup43	-0.211152	1.37512	17.4066	17.1993	17.1444	17.1358	16.8372	17.0832	17.0187	17.1024
20uM E2 vs. DMSO	P49459	UBE2A	Ubiquitin-conjugating enzyme E2 A	0.151601	1.37371	17.928	17.9829	17.9588	18.067	18.2287	18.1482	18.0126	18.1536
20uM E2 vs. DMSO	Q96JB2	COG3	Conserved oligomeric Golgi complex subunit 3	0.415273	1.3737	17.0817	17.8555	17.8956	17.8492	17.9915	18.106	18.2251	18.0206
20uM E2 vs. DMSO	Q8IZ83	ALDH16A1	Aldehyde dehydrogenase family 16 member A1	-0.187628	1.37362	18.1765	18.0186	18.1873	18.1311	17.7565	18.0811	17.9545	17.9709
20uM E2 vs. DMSO	Q96I25	RBM17	Splicing factor 45	-0.18484	1.37287	18.5499	18.3093	18.3577	18.3423	18.0802	18.2766	18.1482	18.3148
20uM E2 vs. DMSO	Q5T5P2	KIAA1217	Sickle tail protein homolog	0.155279	1.37258	17.7671	17.597	17.5338	17.5915	17.7517	17.8041	17.7345	17.8203
20uM E2 vs. DMSO	Q9UJY4	GGA2	ADP-ribosylation factor-binding protein GGA2	-0.328181	1.37243	16.0454	16.0886	15.5317	15.7344	15.5443	15.3398	15.6334	15.57
20uM E2 vs. DMSO	Q8WWC4	MAIP1	m-AAA protease-interacting protein 1, mitochondrial	0.219258	1.37182	14.6071	14.6824	14.4838	14.554	14.8073	14.813	14.7207	14.8632
20uM E2 vs. DMSO	Q14534	SQLE	Squalene monooxygenase	0.673649	1.37135	13.0553	12.572	12.8268	13.7898	13.9606	13.2255	13.8163	13.9361
20uM E2 vs. DMSO	Q9NWZ8	GEMIN8	Gem-associated protein 8	0.277083	1.37134	14.5366	14.3472	14.4528	14.524	14.5572	14.638	14.8307	14.943
20uM E2 vs. DMSO	P48444	ARCN1	Coatomer subunit delta	0.157072	1.37075	20.1536	20.0389	19.9514	19.9883	20.1201	20.1523	20.1617	20.3265
20uM E2 vs. DMSO	Q8N4C6	NIN	Ninein	-0.277414	1.36888	19.2888	18.9054	19.1945	19.25	18.7468	19.125	18.9614	18.6958
20uM E2 vs. DMSO	Q9Y2H5	PLEKHA6	Pleckstrin homology domain-containing family A member 6	0.212607	1.3663	16.758	16.5832	16.6112	16.4766	16.6637	16.9262	16.7678	16.9216
20uM E2 vs. DMSO	Q9H788	SH2D4A	SH2 domain-containing protein 4A	-0.211571	1.36608	15.5717	15.4484	15.3857	15.5988	15.185	15.2578	15.3919	15.3236
20uM E2 vs. DMSO	Q8ND30	PPFIBP2	Liprin-beta-2	-0.442016	1.36554	16.97	17.0332	16.5798	16.9042	16.4075	15.9816	16.4161	16.9139
20uM E2 vs. DMSO	O95372	LYPLA2	Acyl-protein thioesterase 2	0.142807	1.36492	19.1491	19.2311	19.2071	19.227	19.2264	19.4625	19.3177	19.379
20uM E2 vs. DMSO	Q9UHL4	DPP7	Dipeptidyl peptidase 2	0.19755	1.36424	18.2342	17.9944	17.9588	18.0219	18.1152	18.2257	18.2613	18.3972
20uM E2 vs. DMSO	O75348	ATP6V1G1	V-type proton ATPase subunit G 1	0.191872	1.36422	19.1467	18.8283	18.8551	18.877	19.092	19.1875	19.0183	19.1768
20uM E2 vs. DMSO	Q96DR7	ARHGEF26	Rho guanine nucleotide exchange factor 26	-0.26902	1.36379	14.8299	14.7056	14.7432	14.8475	14.4463	14.5878	14.3046	14.7114
20uM E2 vs. DMSO	Q9Y5K8	ATP6V1D	V-type proton ATPase subunit D	0.21287	1.36315	17.5449	17.5833	17.3568	17.4907	17.5153	17.701	17.7152	17.8957
20uM E2 vs. DMSO	Q9NSC5	HOMER3	Homer protein homolog 3	-0.389187	1.36161	13.594	13.7009	13.2178	13.3048	12.9443	12.9186	13.2215	13.1764
20uM E2 vs. DMSO	Q9H8T0	AKTIP	AKT-interacting protein	-0.205366	1.36147	15.4923	15.4637	15.3374	15.3326	15.2491	15.2991	15.1256	15.1308
20uM E2 vs. DMSO	Q9BXT2	CACNG6	Voltage-dependent calcium channel gamma-6 subunit	0.19606	1.35983	18.1508	18.1416	17.9059	18.0944	18.1703	18.189	18.2744	18.4432
20uM E2 vs. DMSO	P10253	GAA	Lysosomal alpha-glucosidase	0.15142	1.35959	18.0911	17.978	17.9417	17.9828	18.1455	18.0584	18.1246	18.2707
20uM E2 vs. DMSO	P56385	ATP5ME	ATP synthase subunit e, mitochondrial	1.93458	1.35933	11.1738	14.7037	15.0434	15.2617	15.6847	15.6142	16.0897	16.5323
20uM E2 vs. DMSO	P49842	STK19	Inactive serine/threonine-protein kinase 19	-0.49724	1.35918	12.6398	12.6939	12.3511	12.6974	11.9439	12.3047	12.404	11.7406
20uM E2 vs. DMSO	Q15417	CNN3	Calponin-3	-0.229226	1.35793	17.7844	17.5031	17.6552	17.6897	17.2477	17.4504	17.3708	17.6465
20uM E2 vs. DMSO	Q15067	ACOX1	Peroxisomal acyl-coenzyme A oxidase 1	0.219543	1.35627	17.778	17.8861	17.7632	17.5634	17.9574	17.9217	17.8267	18.1631
20uM E2 vs. DMSO	Q9Y2Y0	ARL2BP	ADP-ribosylation factor-like protein 2-binding protein	-0.215617	1.35608	16.7879	16.965	16.7517	16.7322	16.4535	16.6658	16.4978	16.7573
20uM E2 vs. DMSO	P09086;P14859;Q9UKI9	POU2F2;POU2F1;POU2F3	POU domain, class 2, transcription factor 2;POU domain, class 2, transcription factor 1;POU domain, class 2, transcription factor 3	-0.620136	1.35578	13.9976	13.9047	13.4084	13.9127	13.6011	12.6327	12.8684	13.6407
20uM E2 vs. DMSO	Q9NRN7	AASDHPPT	L-aminoadipate-semialdehyde dehydrogenase-phosphopantetheinyl transferase	-0.157014	1.35462	17.9454	17.7399	17.8409	17.8644	17.637	17.6118	17.7505	17.7633
20uM E2 vs. DMSO	Q8WW59	SPRYD4	SPRY domain-containing protein 4	0.197066	1.35357	17.9137	17.7791	17.8642	17.6952	17.9795	17.9824	17.8741	18.2045
20uM E2 vs. DMSO	Q96J02	ITCH	E3 ubiquitin-protein ligase Itchy homolog	-0.183987	1.3534	18.8672	18.9039	18.8153	18.9203	18.646	18.5003	18.7858	18.8386
20uM E2 vs. DMSO	Q92598	HSPH1	Heat shock protein 105 kDa	0.121324	1.35334	19.9497	19.891	19.811	19.9101	19.9735	20.0253	19.9669	20.0815
20uM E2 vs. DMSO	Q9H201	EPN3	Epsin-3	-0.193258	1.35322	17.3903	17.3034	17.1907	17.1535	16.9119	17.0609	17.1174	17.1747
20uM E2 vs. DMSO	Q99757	TXN2	Thioredoxin, mitochondrial	0.17796	1.35306	16.7701	16.8551	16.9011	16.8662	17.2024	16.9948	16.9637	16.9434
20uM E2 vs. DMSO	Q9Y6R0	NUMBL	Numb-like protein	0.465524	1.35303	13.2224	12.4189	12.8385	12.9026	13.3973	13.1148	13.2274	13.5052
20uM E2 vs. DMSO	O43896	KIF1C	Kinesin-like protein KIF1C	-0.287315	1.3521	15.1557	15.3966	15.2181	15.1625	14.6415	15.0031	15.0729	15.0662
20uM E2 vs. DMSO	Q8N6R0	METTL13	eEF1A lysine and N-terminal methyltransferase	-0.208443	1.35057	18.2651	18.3387	18.5098	18.485	17.9974	18.2528	18.1785	18.3362
20uM E2 vs. DMSO	P56181	NDUFV3	NADH dehydrogenase [ubiquinone] flavoprotein 3, mitochondrial	0.971743	1.34934	12.8565	12.2065	10.7597	11.714	13.1663	12.7999	12.4705	12.987
20uM E2 vs. DMSO	P11166	SLC2A1	Solute carrier family 2, facilitated glucose transporter member 1	-0.269044	1.34912	15.4257	15.4326	15.2375	15.2458	14.9867	14.9078	15.0394	15.3315
20uM E2 vs. DMSO	P27701	CD82	CD82 antigen	-0.428496	1.34892	15.314	16.0344	15.4806	15.4829	14.8471	15.0274	15.3064	15.417
20uM E2 vs. DMSO	Q8TCF1	ZFAND1	AN1-type zinc finger protein 1	0.170392	1.34871	17.1348	17.2479	17.4133	17.3128	17.3727	17.4493	17.4673	17.5011
20uM E2 vs. DMSO	Q9P2D0	IBTK	Inhibitor of Bruton tyrosine kinase	0.362754	1.34832	13.2134	13.06	13.4495	13.2717	13.3466	13.6621	13.828	13.609
20uM E2 vs. DMSO	Q15910	EZH2	Histone-lysine N-methyltransferase EZH2	0.264276	1.34774	14.7826	14.4345	14.4841	14.6026	14.9229	14.8896	14.6829	14.8655
20uM E2 vs. DMSO	P00387	CYB5R3	NADH-cytochrome b5 reductase 3	0.883491	1.34506	13.6451	13.9952	12.8758	13.2234	13.4624	14.2584	14.2991	15.2536
20uM E2 vs. DMSO	Q9Y2H2	INPP5F	Phosphatidylinositide phosphatase SAC2	-0.197362	1.34489	18.8379	18.795	18.5762	18.752	18.3969	18.5249	18.5308	18.7191
20uM E2 vs. DMSO	Q9Y4B4	RAD54L2	Helicase ARIP4	-0.452665	1.3436	13.5051	13.099	13.2467	13.4012	12.8918	12.8533	12.4653	13.2308
20uM E2 vs. DMSO	Q9Y473	ZNF175	Zinc finger protein 175	-1.66293	1.34216	15.8288	15.9795	16.1616	14.8773	15.1356	15.5302	13.5176	12.012
20uM E2 vs. DMSO	Q8N5F7	NKAP	NF-kappa-B-activating protein	0.508746	1.34215	13.7819	13.7458	12.9812	13.263	13.9645	13.8404	14.2924	13.7095
20uM E2 vs. DMSO	Q5MNZ9	WIPI1	WD repeat domain phosphoinositide-interacting protein 1	0.68346	1.34121	12.5748	12.695	12.2627	13.1941	13.6247	12.615	13.4961	13.7246
20uM E2 vs. DMSO	O15305	PMM2	Phosphomannomutase 2	0.186383	1.34092	19.0575	18.9483	18.8363	18.8771	18.9997	19.0217	19.1573	19.2861
20uM E2 vs. DMSO	Q8TB72	PUM2	Pumilio homolog 2	-0.422963	1.34074	15.1827	15.1833	15.1545	15.2723	14.8806	15.0639	14.1947	14.9617
20uM E2 vs. DMSO	Q14694	USP10	Ubiquitin carboxyl-terminal hydrolase 10	-0.149816	1.33994	18.1635	18.0242	17.9503	18.0499	17.9295	17.9593	17.8861	17.8136
20uM E2 vs. DMSO	Q58FF7	HSP90AB3P	Putative heat shock protein HSP 90-beta-3	-1.25977	1.33988	13.2584	14.1354	14.1095	14.4619	11.1772	13.5507	12.4911	13.707
20uM E2 vs. DMSO	Q8NF37	LPCAT1	Lysophosphatidylcholine acyltransferase 1	-0.306575	1.3396	16.0987	16.1996	16.0969	16.0404	15.5035	15.6408	16.0148	16.0501
20uM E2 vs. DMSO	Q9NTI5	PDS5B	Sister chromatid cohesion protein PDS5 homolog B	-0.341758	1.33931	17.7772	17.1718	17.1771	17.3043	16.8188	17.212	17.0825	16.95
20uM E2 vs. DMSO	Q92882	OSTF1	Osteoclast-stimulating factor 1	0.164999	1.33846	17.1793	17.0846	16.9367	17.0898	17.1562	17.2473	17.235	17.3118
20uM E2 vs. DMSO	O94901	SUN1	SUN domain-containing protein 1	-0.806306	1.33783	11.9014	12.163	12.4138	12.8506	11.0831	11.8044	12.2413	10.9748
20uM E2 vs. DMSO	O94979	SEC31A	Protein transport protein Sec31A	0.164857	1.33761	19.4463	19.3059	19.4032	19.3314	19.4498	19.412	19.6213	19.663
20uM E2 vs. DMSO	Q8N4P3	HDDC3	Guanosine-3',5'-bis(diphosphate) 3'-pyrophosphohydrolase MESH1	0.193176	1.33736	15.0384	15.1311	15.1283	15.0537	15.1602	15.3091	15.3227	15.3322
20uM E2 vs. DMSO	Q8ND76	CCNY	Cyclin-Y	-0.240169	1.33692	14.7956	14.9448	14.6556	14.8797	14.6748	14.4698	14.6142	14.5563
20uM E2 vs. DMSO	Q8TEL6	TRPC4AP	Short transient receptor potential channel 4-associated protein	0.237232	1.33586	16.8798	16.6684	16.5885	16.5057	16.8464	17.0951	16.8564	16.7935
20uM E2 vs. DMSO	P51151	RAB9A	Ras-related protein Rab-9A	0.216362	1.33503	17.6762	17.614	17.4456	17.5423	17.6248	17.8426	17.6826	17.9935
20uM E2 vs. DMSO	O43278	SPINT1	Kunitz-type protease inhibitor 1	0.189855	1.33362	17.0629	17.1059	16.9754	17.1668	17.0721	17.3586	17.3028	17.3368
20uM E2 vs. DMSO	P51688	SGSH	N-sulphoglucosamine sulphohydrolase	-0.232578	1.3336	15.6863	15.5344	15.4302	15.5054	15.2882	15.1808	15.2561	15.501
20uM E2 vs. DMSO	Q9ULM3	YEATS2	YEATS domain-containing protein 2	-0.46606	1.33347	12.5345	12.3907	12.1187	12.3253	11.6831	12.0856	11.6886	12.0478
20uM E2 vs. DMSO	O00418	EEF2K	Eukaryotic elongation factor 2 kinase	-0.231874	1.33345	16.1724	16.1813	16.0221	16.3032	15.7929	16.0597	16.0783	15.8205
20uM E2 vs. DMSO	Q9UBE0	SAE1	SUMO-activating enzyme subunit 1	-0.155029	1.33341	19.0616	19.0468	18.8777	19.0081	18.7803	18.7832	18.832	18.9785
20uM E2 vs. DMSO	P51572	BCAP31	B-cell receptor-associated protein 31	0.282798	1.33235	17.7705	17.4188	17.5517	17.6691	17.5635	18.0039	17.9025	18.0714
20uM E2 vs. DMSO	Q9Y6B6	SAR1B	GTP-binding protein SAR1b	0.424482	1.3323	18.5369	18.6673	18.2706	18.0989	18.3553	18.8696	19.1901	18.8566
20uM E2 vs. DMSO	P50897	PPT1	Palmitoyl-protein thioesterase 1	-0.132656	1.33222	19.1194	19.0629	18.9803	18.9904	18.9176	18.8776	18.8346	18.9926
20uM E2 vs. DMSO	P61201	COPS2	COP9 signalosome complex subunit 2	0.150794	1.33216	18.9045	18.7925	18.7633	18.7829	18.825	18.9784	18.974	19.0688
20uM E2 vs. DMSO	Q00765	REEP5	Receptor expression-enhancing protein 5	0.203557	1.33088	16.9353	17.0347	16.7632	16.9575	16.952	17.1228	17.1801	17.25
20uM E2 vs. DMSO	O76071	CIAO1	Probable cytosolic iron-sulfur protein assembly protein CIAO1	0.200289	1.3287	17.5112	17.3921	17.1974	17.2445	17.4862	17.5646	17.4378	17.6578
20uM E2 vs. DMSO	O00487	PSMD14	26S proteasome non-ATPase regulatory subunit 14	0.201005	1.32828	19.261	19.2785	19.1496	19.2169	19.1679	19.4956	19.4893	19.5573
20uM E2 vs. DMSO	P08962	CD63	CD63 antigen	0.313352	1.32817	17.1049	17.1121	16.7259	16.8367	17.0727	17.1786	17.1834	17.5983
20uM E2 vs. DMSO	Q9H910	JPT2	Jupiter microtubule associated homolog 2	0.219961	1.32735	19.9066	19.8069	19.7999	19.7873	19.8371	19.952	20.0859	20.3056
20uM E2 vs. DMSO	Q92934	BAD	Bcl2-associated agonist of cell death	0.182323	1.32708	17.1811	16.9142	16.89	16.9601	17.1318	17.2	17.1124	17.2305
20uM E2 vs. DMSO	Q9BQQ3	GORASP1	Golgi reassembly-stacking protein 1	0.380072	1.32629	12.4405	12.6123	12.5511	12.7145	12.6759	13.0068	13.043	13.113
20uM E2 vs. DMSO	Q8NG31	KNL1	Kinetochore scaffold 1	-3.3593	1.32494	12.3006	19.8074	12.5072	14.7818	11.1002	11.8183	11.5308	11.5105
20uM E2 vs. DMSO	Q9Y624	F11R	Junctional adhesion molecule A	-0.243096	1.32466	15.7003	15.8928	15.7541	15.6444	15.2785	15.4982	15.5762	15.6663
20uM E2 vs. DMSO	O60287	URB1	Nucleolar pre-ribosomal-associated protein 1	1.18659	1.3245	15.443	14.1618	13.9413	14.4542	16.1217	14.2055	15.833	16.5864
20uM E2 vs. DMSO	Q15311	RALBP1	RalA-binding protein 1	0.582591	1.32433	14.9154	15.8314	16.1715	16.043	16.1807	16.3725	16.2008	16.5376
20uM E2 vs. DMSO	O95551	TDP2	Tyrosyl-DNA phosphodiesterase 2	-0.33237	1.32392	15.4913	15.3289	14.9157	15.1641	15.0095	14.6829	14.8361	15.0419
20uM E2 vs. DMSO	O75962	TRIO	Triple functional domain protein	-0.191334	1.32381	15.8935	15.9311	15.813	16.0294	15.6898	15.78	15.6161	15.8157
20uM E2 vs. DMSO	Q9UHB7	AFF4	AF4/FMR2 family member 4	-0.692849	1.32147	16.1164	15.7709	15.2898	16.2252	15.8797	14.6756	15.3446	14.731
20uM E2 vs. DMSO	O14618	CCS	Copper chaperone for superoxide dismutase	0.283495	1.31988	18.197	17.8867	17.811	18.0086	18.3121	18.3388	17.9412	18.4451
20uM E2 vs. DMSO	O15397	IPO8	Importin-8	-0.186142	1.31915	16.6971	16.4677	16.5859	16.5871	16.319	16.4417	16.308	16.5245
20uM E2 vs. DMSO	P63010	AP2B1	AP-2 complex subunit beta	0.126764	1.319	20.5744	20.5904	20.5472	20.5237	20.5643	20.6932	20.7758	20.7094
20uM E2 vs. DMSO	Q8IUF8	RIOX2	Ribosomal oxygenase 2	-0.619745	1.3176	16.2944	16.0119	16.1132	15.9364	15.0493	14.8626	15.8134	16.1518
20uM E2 vs. DMSO	Q96P16	RPRD1A	Regulation of nuclear pre-mRNA domain-containing protein 1A	-0.171352	1.31728	18.3836	18.2525	18.1829	18.1877	17.9399	18.1182	18.0633	18.1998
20uM E2 vs. DMSO	Q96GQ7	DDX27	Probable ATP-dependent RNA helicase DDX27	-0.157386	1.31646	18.0407	18.0196	17.8624	18.1291	17.7979	17.8416	17.8604	17.9224
20uM E2 vs. DMSO	P09104	ENO2	Gamma-enolase	0.130414	1.31587	22.0938	21.9596	22.0815	22.127	22.2316	22.1632	22.1219	22.2669
20uM E2 vs. DMSO	Q5TEC6	H3-7	Histone H3-7	0.278705	1.3145	17.7591	17.7211	17.4471	17.5833	17.7416	17.7675	18.2409	17.8753
20uM E2 vs. DMSO	Q14118	DAG1	Dystroglycan 1	-0.291338	1.3141	17.2694	17.0719	17.0609	16.8317	16.516	16.7414	16.7721	17.0391
20uM E2 vs. DMSO	Q02218	OGDH	2-oxoglutarate dehydrogenase complex component E1	0.257329	1.31329	18.8381	18.7771	18.689	18.6259	18.9745	18.8343	18.8264	19.3242
20uM E2 vs. DMSO	Q9NTM9	CUTC	Copper homeostasis protein cutC homolog	0.206906	1.31135	16.1725	16.2499	16.1549	16.1707	16.2468	16.4005	16.3127	16.6155
20uM E2 vs. DMSO	Q96HA7	TONSL	Tonsoku-like protein	-0.47801	1.31064	14.4442	13.6779	14.4091	14.6763	13.9334	13.9131	13.7658	13.6832
20uM E2 vs. DMSO	Q9Y2W6	TDRKH	Tudor and KH domain-containing protein	0.352925	1.30987	13.5138	13.7152	13.4134	13.5219	13.8299	14.0269	14.137	13.5822
20uM E2 vs. DMSO	Q9NUQ8	ABCF3	ATP-binding cassette sub-family F member 3	0.177054	1.30842	18.2698	18.001	18.0463	18.097	18.1675	18.3134	18.2455	18.3959
20uM E2 vs. DMSO	P15882	CHN1	N-chimaerin	0.414333	1.30838	16.2733	15.9359	15.4716	15.7599	16.356	16.0706	16.0935	16.5779
20uM E2 vs. DMSO	Q9H9P8	L2HGDH	L-2-hydroxyglutarate dehydrogenase, mitochondrial	-0.134907	1.30819	17.3064	17.3683	17.3616	17.2567	17.2688	17.1556	17.1628	17.1661
20uM E2 vs. DMSO	Q9NP72	RAB18	Ras-related protein Rab-18	0.124186	1.30761	19.3647	19.2815	19.2641	19.3824	19.5024	19.372	19.4188	19.4962
20uM E2 vs. DMSO	O15228	GNPAT	Dihydroxyacetone phosphate acyltransferase	0.531652	1.30673	12.771	13.2204	12.673	12.8251	13.6217	12.7863	13.6606	13.5475
20uM E2 vs. DMSO	P26006	ITGA3	Integrin alpha-3	-0.464825	1.3063	14.4615	14.512	14.1769	14.5609	13.9385	14.3593	13.4156	14.1386
20uM E2 vs. DMSO	Q9BSH5	HDHD3	Haloacid dehalogenase-like hydrolase domain-containing protein 3	0.346627	1.30625	16.5573	15.961	16.4576	16.3584	16.7937	16.5915	16.4204	16.9151
20uM E2 vs. DMSO	Q6ULP2	AFTPH	Aftiphilin	0.238118	1.30572	15.8016	15.7155	15.4297	15.6263	15.7743	15.8642	15.8398	16.0473
20uM E2 vs. DMSO	Q5RKV6	EXOSC6	Exosome complex component MTR3	-0.327149	1.30495	17.6803	17.6697	17.7786	17.5789	17.345	17.5282	16.9076	17.6181
20uM E2 vs. DMSO	Q9P021	CRIPT	Cysteine-rich PDZ-binding protein	-0.343426	1.3049	15.7326	16.257	15.8682	16.0233	15.4717	15.5311	15.5198	15.9848
20uM E2 vs. DMSO	Q9BVC3	DSCC1	Sister chromatid cohesion protein DCC1	-1.20947	1.30471	16.3795	14.1703	13.9559	14.3766	13.7075	13.6579	14.0092	12.6698
20uM E2 vs. DMSO	Q5TBB1	RNASEH2B	Ribonuclease H2 subunit B	0.342778	1.3047	20.0985	19.8276	19.8193	19.554	19.8278	20.4038	20.0725	20.3663
20uM E2 vs. DMSO	Q8N9L9	ACOT4	Peroxisomal succinyl-coenzyme A thioesterase	0.168063	1.30185	16.8909	16.8278	16.6937	16.7157	16.9552	16.9327	16.8579	17.0546
20uM E2 vs. DMSO	Q9NPR2	SEMA4B	Semaphorin-4B	0.389611	1.30183	12.5873	12.4281	12.9565	12.8828	13.1009	12.9608	13.1619	13.1897
20uM E2 vs. DMSO	Q6PD62	CTR9	RNA polymerase-associated protein CTR9 homolog	-0.154363	1.30075	17.2277	17.124	17.0332	17.0522	16.924	16.9155	16.9388	17.0415
20uM E2 vs. DMSO	Q15813	TBCE	Tubulin-specific chaperone E	0.265487	1.29998	17.8869	17.5625	17.5138	17.622	17.7487	18.1622	17.7582	17.9782
20uM E2 vs. DMSO	O95251	KAT7	Histone acetyltransferase KAT7	-0.202929	1.29919	16.0896	15.7798	15.8125	15.947	15.6858	15.7168	15.6491	15.7654
20uM E2 vs. DMSO	P46063	RECQL	ATP-dependent DNA helicase Q1	-0.164233	1.29905	19.3793	19.3773	19.1368	19.2568	19.1092	19.0113	19.168	19.2048
20uM E2 vs. DMSO	Q9NPF4	OSGEP	tRNA N6-adenosine threonylcarbamoyltransferase	-0.411744	1.29854	18.1744	17.9133	18.2831	18.1266	18.1528	17.4307	17.9339	17.3331
20uM E2 vs. DMSO	P15374	UCHL3	Ubiquitin carboxyl-terminal hydrolase isozyme L3	0.155839	1.29797	18.4967	18.4478	18.289	18.3166	18.4447	18.5796	18.5211	18.6281
20uM E2 vs. DMSO	Q9HCK8	CHD8	Chromodomain-helicase-DNA-binding protein 8	-0.267818	1.29791	16.4103	16.214	15.9896	16.043	16.0564	15.7115	15.8412	15.9764
20uM E2 vs. DMSO	P80217	IFI35	Interferon-induced 35 kDa protein	0.361334	1.29787	18.0894	18.4144	17.7104	17.6791	18.5174	18.2729	18.2789	18.2695
20uM E2 vs. DMSO	Q6PL24	TMED8	Protein TMED8	-0.599531	1.29719	15.0426	14.7506	14.7606	14.6409	13.3362	14.5166	14.5475	14.3964
20uM E2 vs. DMSO	Q6IBW4	NCAPH2	Condensin-2 complex subunit H2	-0.497711	1.29682	15.0773	14.7614	14.7214	14.7328	13.8706	14.3411	14.14	14.9503
20uM E2 vs. DMSO	P08397	HMBS	Porphobilinogen deaminase	0.156549	1.29656	17.6334	17.741	17.6955	17.5198	17.7097	17.8233	17.8901	17.7929
20uM E2 vs. DMSO	P00558	PGK1	Phosphoglycerate kinase 1	0.156578	1.29639	22.4907	22.3903	22.3061	22.3827	22.5046	22.5392	22.4446	22.7076
20uM E2 vs. DMSO	Q14919	DRAP1	Dr1-associated corepressor	-0.13071	1.29622	17.939	17.9504	17.8331	17.9359	17.7863	17.7377	17.7419	17.8696
20uM E2 vs. DMSO	Q96FJ2	DYNLL2	Dynein light chain 2, cytoplasmic	-0.151614	1.29598	19.8836	19.9501	19.7331	19.8731	19.8339	19.7181	19.6424	19.639
20uM E2 vs. DMSO	P35611	ADD1	Alpha-adducin	0.60329	1.29546	16.3902	16.0474	16.2654	15.206	16.1669	16.6027	16.5779	16.9747
20uM E2 vs. DMSO	Q05519	SRSF11	Serine/arginine-rich splicing factor 11	-0.176596	1.29183	18.7971	18.5463	18.5508	18.5313	18.3965	18.5275	18.3195	18.4755
20uM E2 vs. DMSO	P10909	CLU	Clusterin	0.18357	1.29179	15.8887	15.8862	15.7641	15.8555	15.9537	15.9221	16.1114	16.1417
20uM E2 vs. DMSO	O95831	AIFM1	Apoptosis-inducing factor 1, mitochondrial	0.162616	1.29083	18.3872	18.3267	18.2324	18.1833	18.4863	18.3109	18.4312	18.5517
20uM E2 vs. DMSO	Q8IZD9	DOCK3	Dedicator of cytokinesis protein 3	0.268732	1.28955	16.7958	16.5651	16.6091	16.4433	16.6624	17.133	16.7493	16.9434
20uM E2 vs. DMSO	Q9UKF6	CPSF3	Cleavage and polyadenylation specificity factor subunit 3	-0.178798	1.28863	18.8141	18.6185	18.5722	18.5986	18.3427	18.4835	18.44	18.6219
20uM E2 vs. DMSO	Q969F1	GTF3C6	General transcription factor 3C polypeptide 6	-0.22342	1.28846	15.6739	15.5527	15.535	15.6868	15.4138	15.367	15.2003	15.5737
20uM E2 vs. DMSO	Q9NV70	EXOC1	Exocyst complex component 1	0.194113	1.28705	18.0072	17.715	17.7191	17.6623	17.8578	18.0272	17.9712	18.0238
20uM E2 vs. DMSO	Q13615	MTMR3	Myotubularin-related protein 3	-0.409475	1.28677	14.8486	14.1815	14.7033	14.5749	14.3433	14.4241	13.9029	14.0003
20uM E2 vs. DMSO	Q9NWY4	HPF1	Histone PARylation factor 1	-0.136308	1.28554	16.633	16.6497	16.6091	16.6245	16.4703	16.4543	16.4751	16.5714
20uM E2 vs. DMSO	Q9HA77	CARS2	Probable cysteine--tRNA ligase, mitochondrial	0.18083	1.28473	17.3003	17.2061	17.2733	17.2404	17.4396	17.2851	17.3841	17.6346
20uM E2 vs. DMSO	Q13613	MTMR1	Myotubularin-related protein 1	-0.23783	1.2845	15.4687	15.2061	15.4807	15.3167	14.9441	15.2323	15.1276	15.2167
20uM E2 vs. DMSO	Q15005	SPCS2	Signal peptidase complex subunit 2	0.412318	1.28404	13.7664	14.4304	14.3666	14.4747	14.3989	14.6402	14.7742	14.8741
20uM E2 vs. DMSO	Q16864	ATP6V1F	V-type proton ATPase subunit F	0.1608	1.28384	17.4227	17.2779	17.2519	17.2657	17.3544	17.4496	17.4683	17.5891
20uM E2 vs. DMSO	P24539	ATP5PB	ATP synthase F(0) complex subunit B1, mitochondrial	0.902707	1.28189	11.9157	13.294	12.8163	13.2865	13.4201	13.0553	13.8461	14.6017
20uM E2 vs. DMSO	O60921	HUS1	Checkpoint protein HUS1	-0.258169	1.2815	15.1357	15.2725	14.8704	14.9442	14.8126	14.8554	14.6625	14.8595
20uM E2 vs. DMSO	Q96IY1	NSL1	Kinetochore-associated protein NSL1 homolog	-0.643023	1.2811	14.2905	14.4669	14.2036	13.9751	14.3023	13.6587	13.6035	12.7994
20uM E2 vs. DMSO	Q9UHY1	NRBP1	Nuclear receptor-binding protein	0.173594	1.27957	17.8825	17.6872	17.7683	17.7595	17.879	18.1293	17.8501	17.9335
20uM E2 vs. DMSO	Q9UMX1	SUFU	Suppressor of fused homolog	-0.325587	1.27932	14.2242	14.6761	14.3824	14.7412	14.1335	14.0174	14.2919	14.2788
20uM E2 vs. DMSO	Q8TBA6	GOLGA5	Golgin subfamily A member 5	0.291345	1.27868	15.6928	15.6803	15.4588	15.6402	15.5585	16.0125	16.1388	15.9277
20uM E2 vs. DMSO	O14745	NHERF1	Na(+)/H(+) exchange regulatory cofactor NHE-RF1	0.208161	1.27821	22.1367	21.928	21.9187	21.8497	22.0426	22.4015	22.0939	22.1278
20uM E2 vs. DMSO	Q15631	TSN	Translin	-0.200687	1.27819	19.0893	19.312	19.2821	19.119	18.8866	19.1904	19.0606	18.862
20uM E2 vs. DMSO	Q9NUQ9	CYRIB	CYFIP-related Rac1 interactor B	0.52767	1.27789	16.0882	16.8264	15.6854	16.1319	16.2949	16.8604	16.7737	16.9136
20uM E2 vs. DMSO	Q9BZ95	NSD3	Histone-lysine N-methyltransferase NSD3	-0.374025	1.2776	12.744	12.5056	12.4939	12.5761	12.3112	12.2652	12.2258	12.0213
20uM E2 vs. DMSO	Q9UNF0	PACSIN2	Protein kinase C and casein kinase substrate in neurons protein 2	0.211464	1.27686	18.9243	18.7181	18.6048	18.6338	18.7894	18.9011	18.9043	19.1319
20uM E2 vs. DMSO	Q2VIR3	EIF2S3B	Eukaryotic translation initiation factor 2 subunit 3B	0.202369	1.27676	18.5664	18.6787	18.4799	18.5122	18.7971	18.9715	18.7174	18.5605
20uM E2 vs. DMSO	P62266	RPS23	Small ribosomal subunit protein uS12	-0.151102	1.27534	19.975	19.9761	20.0394	20.2407	19.9639	19.8978	19.8896	19.8754
20uM E2 vs. DMSO	Q15050	RRS1	Ribosome biogenesis regulatory protein homolog	0.300287	1.2753	16.2689	16.5308	16.5776	16.8639	16.6959	16.982	16.737	17.0275
20uM E2 vs. DMSO	P25705	ATP5F1A	ATP synthase subunit alpha, mitochondrial	0.306303	1.27476	21.0123	20.9122	20.7957	20.577	21.1791	21.0309	20.8538	21.4585
20uM E2 vs. DMSO	Q10472	GALNT1	Polypeptide N-acetylgalactosaminyltransferase 1	0.367927	1.27403	13.6179	13.1387	13.108	13.1952	13.3865	13.7263	13.6745	13.7442
20uM E2 vs. DMSO	P19525	EIF2AK2	Interferon-induced, double-stranded RNA-activated protein kinase	-0.151879	1.27304	17.0606	16.9818	16.8343	17.0377	16.8037	16.8366	16.8262	16.8406
20uM E2 vs. DMSO	Q06330	RBPJ	Recombining binding protein suppressor of hairless	-0.218201	1.27295	15.0886	15.151	14.9264	15.0789	14.9084	14.8699	14.6824	14.9115
20uM E2 vs. DMSO	Q14974	KPNB1	Importin subunit beta-1	-0.128897	1.27295	20.452	20.5563	20.3759	20.5664	20.2916	20.3952	20.3725	20.3758
20uM E2 vs. DMSO	P15311	EZR	Ezrin	0.117259	1.27287	20.9616	20.9649	20.8911	20.9179	20.9883	21.078	20.9911	21.1471
20uM E2 vs. DMSO	P11233	RALA	Ras-related protein Ral-A	-0.204646	1.27256	15.7323	15.7129	15.5068	15.5728	15.368	15.3334	15.5598	15.445
20uM E2 vs. DMSO	O95714	HERC2	E3 ubiquitin-protein ligase HERC2	-1.40124	1.27207	17.989	18.0257	16.1598	17.924	14.9123	16.7843	15.3257	17.4713
20uM E2 vs. DMSO	Q13228	SELENBP1	Methanethiol oxidase	0.18337	1.27168	20.2904	20.1248	20.1495	20.155	20.2205	20.322	20.3234	20.5874
20uM E2 vs. DMSO	O43504	LAMTOR5	Ragulator complex protein LAMTOR5	0.237977	1.27167	16.483	16.316	16.1401	16.6393	16.6215	16.6886	16.596	16.6242
20uM E2 vs. DMSO	Q9GZS3	SKIC8	Superkiller complex protein 8	0.240707	1.2715	17.8879	17.3965	17.5642	17.6542	17.7869	17.9087	17.7625	18.0077
20uM E2 vs. DMSO	P49757	NUMB	Protein numb homolog	0.242673	1.27123	16.8192	16.8929	16.453	16.7761	16.8195	16.9647	17.0191	17.1087
20uM E2 vs. DMSO	Q86V48	LUZP1	Leucine zipper protein 1	0.241914	1.26979	15.4259	15.3675	15.1334	15.1989	15.6081	15.6815	15.433	15.3707
20uM E2 vs. DMSO	O75356	ENTPD5	Nucleoside diphosphate phosphatase ENTPD5	0.353468	1.26953	13.6531	14.1722	13.6049	13.9579	14.2751	14.1336	14.3588	14.0344
20uM E2 vs. DMSO	Q9Y3L3	SH3BP1	SH3 domain-binding protein 1	-0.280029	1.26934	15.3896	15.1884	15.1994	15.2176	14.6416	15.1578	15.0313	15.0441
20uM E2 vs. DMSO	Q9Y6Q2	STON1	Stonin-1	-1.08462	1.26862	12.8459	12.1473	12.5282	11.2475	11.2137	12.2038	10.7894	10.2236
20uM E2 vs. DMSO	Q9BQE5	APOL2	Apolipoprotein L2	0.427795	1.26753	13.5094	13.9317	13.365	13.0817	13.7686	14.0131	14.059	13.7582
20uM E2 vs. DMSO	O00506	STK25	Serine/threonine-protein kinase 25	-0.462605	1.26741	16.3751	15.4855	16.2425	15.9476	15.9423	15.5038	15.3554	15.3988
20uM E2 vs. DMSO	O95299	NDUFA10	NADH dehydrogenase [ubiquinone] 1 alpha subcomplex subunit 10, mitochondrial	0.568288	1.26628	12.7159	13.4289	13.7071	13.839	13.8369	13.711	14.2037	14.2125
20uM E2 vs. DMSO	Q9H147	DNTTIP1	Deoxynucleotidyltransferase terminal-interacting protein 1	-0.22093	1.26606	15.3171	15.2522	15.0261	15.2094	14.9196	15.0037	14.8913	15.1064
20uM E2 vs. DMSO	Q9Y2L5	TRAPPC8	Trafficking protein particle complex subunit 8	-0.494099	1.26536	17.598	17.5503	17.8957	17.6062	17.7698	16.5471	17.1921	17.1647
20uM E2 vs. DMSO	O95749	GGPS1	Geranylgeranyl pyrophosphate synthase	0.172342	1.26383	18.2868	18.4347	18.2456	18.286	18.3064	18.5016	18.517	18.6174
20uM E2 vs. DMSO	P55735	SEC13	Protein SEC13 homolog	0.156275	1.26168	19.7742	19.6024	19.6009	19.5679	19.639	19.8679	19.8301	19.8335
20uM E2 vs. DMSO	Q99798	ACO2	Aconitate hydratase, mitochondrial	0.226351	1.2611	19.9442	19.8821	19.7794	19.6536	19.9843	19.9077	19.9536	20.3191
20uM E2 vs. DMSO	Q9BQ15	NABP2	SOSS complex subunit B1	-0.22288	1.26075	16.4002	16.2362	16.2844	16.1285	15.9	15.9089	16.1379	16.2107
20uM E2 vs. DMSO	P08133	ANXA6	Annexin A6	-0.322683	1.259	21.2869	21.4124	21.3449	20.885	21.269	20.8417	20.7625	20.7654
20uM E2 vs. DMSO	Q9NR50	EIF2B3	Translation initiation factor eIF2B subunit gamma	0.143484	1.25877	16.9096	17.0357	16.998	17.127	17.1153	17.1692	17.1818	17.1778
20uM E2 vs. DMSO	Q9Y6Y0	IVNS1ABP	Influenza virus NS1A-binding protein	-0.230919	1.25713	15.4661	15.396	15.1398	15.4427	14.9908	15.1201	15.1846	15.2256
20uM E2 vs. DMSO	Q8N488	RYBP	RING1 and YY1-binding protein	-0.374462	1.25643	14.8141	14.6982	14.4405	14.4716	14.6072	14.3386	14.0245	13.9564
20uM E2 vs. DMSO	P46939	UTRN	Utrophin	0.425085	1.25597	16.6225	16.454	15.8533	16.4248	16.4035	16.8105	17.1141	16.7268
20uM E2 vs. DMSO	Q8NHP6	MOSPD2	Motile sperm domain-containing protein 2	0.244858	1.25576	14.5341	14.4509	14.4148	14.7544	14.7107	14.8988	14.7047	14.8195
20uM E2 vs. DMSO	O95229	ZWINT	ZW10 interactor	-0.747679	1.25573	14.9447	15.1688	15.0645	15.0957	14.6793	14.5968	14.8565	13.1505
20uM E2 vs. DMSO	Q13445	TMED1	Transmembrane emp24 domain-containing protein 1	0.564083	1.25494	14.4566	15.1563	14.4475	14.9036	14.667	15.3217	15.4222	15.8094
20uM E2 vs. DMSO	Q96QR8	PURB	Transcriptional activator protein Pur-beta	0.180184	1.25472	17.6063	17.8394	17.5714	17.7884	17.7454	17.9285	17.9464	17.9058
20uM E2 vs. DMSO	Q9Y2K6	USP20	Ubiquitin carboxyl-terminal hydrolase 20	0.32919	1.25419	14.8535	15.0835	14.8632	14.5765	15.0178	14.9908	15.1945	15.4904
20uM E2 vs. DMSO	Q9BUP0	EFHD1	EF-hand domain-containing protein D1	-0.161562	1.25312	21.6442	21.6298	21.7024	21.7868	21.6985	21.5498	21.3868	21.4818
20uM E2 vs. DMSO	Q9P2R6	RERE	Arginine-glutamic acid dipeptide repeats protein	-0.266825	1.25278	14.1963	14.0295	14.0012	14.1528	13.7891	13.6737	13.8325	14.0172
20uM E2 vs. DMSO	Q8IWT0	ZBTB8OS	Protein archease	0.259205	1.25139	16.618	16.2239	16.3378	16.4465	16.5782	16.5808	16.561	16.9429
20uM E2 vs. DMSO	Q2TAY7	SMU1	WD40 repeat-containing protein SMU1	-0.160607	1.25099	18.1592	17.9827	17.9253	17.8967	17.7547	17.8486	17.8026	17.9154
20uM E2 vs. DMSO	P61513	RPL37A	Large ribosomal subunit protein eL43	0.205704	1.25073	18.8411	18.4987	18.5064	18.7935	18.8421	18.9536	18.7617	18.9051
20uM E2 vs. DMSO	A8MWD9;P62308	SNRPGP15;SNRPG	Putative small nuclear ribonucleoprotein G-like protein 15;Small nuclear ribonucleoprotein G	-0.144866	1.25032	19.5718	19.6252	19.7934	19.7298	19.5268	19.6423	19.5024	19.4693
20uM E2 vs. DMSO	Q92905	COPS5	COP9 signalosome complex subunit 5	0.14139	1.24973	18.3347	18.2304	18.2795	18.24	18.3093	18.4251	18.3675	18.5482
20uM E2 vs. DMSO	Q9NXC5	MIOS	GATOR2 complex protein MIOS	0.253466	1.24931	17.5798	17.3955	17.4632	17.5981	17.5658	18.0994	17.728	17.6572
20uM E2 vs. DMSO	P61106	RAB14	Ras-related protein Rab-14	0.159337	1.24931	19.7326	19.6268	19.5889	19.7186	19.6648	19.8729	19.7999	19.9668
20uM E2 vs. DMSO	P08651	NFIC	Nuclear factor 1 C-type	0.557786	1.24786	14.8121	13.6347	14.6955	14.7171	15.0657	14.8017	15.0126	15.2105
20uM E2 vs. DMSO	Q6KB66	KRT80	Keratin, type II cytoskeletal 80	-0.365931	1.24759	13.6384	13.2334	13.7545	13.5616	12.9606	13.4155	13.1552	13.1929
20uM E2 vs. DMSO	Q96B36	AKT1S1	Proline-rich AKT1 substrate 1	0.183966	1.24709	17.12	17.002	17.1548	17.2077	17.2382	17.2175	17.2576	17.5071
20uM E2 vs. DMSO	Q659C4	LARP1B	La-related protein 1B	0.604019	1.24647	12.1777	11.8627	12.0234	11.0074	12.4372	12.2846	12.3137	12.4516
20uM E2 vs. DMSO	O95716	RAB3D	Ras-related protein Rab-3D	0.202356	1.24577	19.159	19.1647	18.9003	18.963	19.0411	19.2725	19.3049	19.3779
20uM E2 vs. DMSO	Q9BZK7	TBL1XR1	F-box-like/WD repeat-containing protein TBL1XR1	-0.163024	1.24258	18.8858	18.743	18.59	18.6849	18.5201	18.4865	18.5796	18.6654
20uM E2 vs. DMSO	Q8IUZ5	PHYKPL	5-phosphohydroxy-L-lysine phospho-lyase	0.311005	1.2425	13.3272	13.5273	13.1148	13.4138	13.8442	13.5855	13.5888	13.6086
20uM E2 vs. DMSO	O43488	AKR7A2	Aflatoxin B1 aldehyde reductase member 2	-0.156714	1.24155	18.9182	18.7946	18.6756	18.7561	18.6224	18.5996	18.5354	18.7603
20uM E2 vs. DMSO	P05166	PCCB	Propionyl-CoA carboxylase beta chain, mitochondrial	0.225394	1.24047	18.384	18.3249	18.2068	18.111	18.4353	18.3361	18.398	18.7589
20uM E2 vs. DMSO	O60346	PHLPP1	PH domain leucine-rich repeat-containing protein phosphatase 1	-0.612943	1.24031	11.502	12.1741	12.0774	11.7264	10.9613	11.8128	11.1355	11.1185
20uM E2 vs. DMSO	Q14689	DIP2A	Disco-interacting protein 2 homolog A	0.517101	1.23981	15.4195	15.6223	15.0112	15.5185	15.7146	15.3772	16.4978	16.0502
20uM E2 vs. DMSO	Q9Y6E2	BZW2	eIF5-mimic protein 1	-0.134422	1.23871	20.2323	20.0898	20.0783	20.1113	19.9246	20.0353	19.9162	20.098
20uM E2 vs. DMSO	P82663	MRPS25	Small ribosomal subunit protein mS25	0.316381	1.23851	15.835	16.0096	16.1373	16.1135	16.1566	16.1453	16.3014	16.7579
20uM E2 vs. DMSO	Q4G176	ACSF3	Malonate--CoA ligase ACSF3, mitochondrial	0.21516	1.23805	17.5387	17.3783	17.3054	17.219	17.5461	17.4472	17.5072	17.8015
20uM E2 vs. DMSO	O15131	KPNA5	Importin subunit alpha-6	0.119004	1.23772	18.7511	18.7357	18.8012	18.7709	18.7894	18.9608	18.9311	18.8537
20uM E2 vs. DMSO	A3KMH1	VWA8	von Willebrand factor A domain-containing protein 8	0.191698	1.23765	18.8244	18.7148	18.5479	18.4763	18.7131	18.8769	18.8031	18.937
20uM E2 vs. DMSO	Q658N2	WSCD1	Sialate:O-sulfotransferase 1	-0.305092	1.23734	17.0298	17.0908	16.8932	16.9269	16.745	16.2539	16.9493	16.7721
20uM E2 vs. DMSO	O75054	IGSF3	Immunoglobulin superfamily member 3	-0.62697	1.23697	13.2649	13.4192	13.377	13.4354	13.3243	11.9351	13.1234	12.6057
20uM E2 vs. DMSO	P05452	CLEC3B	Tetranectin	0.474738	1.23685	13.7766	13.8876	13.4546	13.3124	13.6836	13.9831	14.0683	14.5951
20uM E2 vs. DMSO	Q5JPH6	EARS2	Nondiscriminating glutamyl-tRNA synthetase EARS2, mitochondrial	0.555156	1.23661	16.3774	16.3903	16.1922	16.0898	16.5148	17.6619	16.3701	16.7236
20uM E2 vs. DMSO	Q53S33	BOLA3	BolA-like protein 3	0.330463	1.23606	17.4217	17.5946	17.342	17.7983	17.6024	17.7226	17.9022	18.2512
20uM E2 vs. DMSO	Q9UMZ2	SYNRG	Synergin gamma	0.159609	1.23581	18.9994	18.7175	18.7036	18.8338	18.9589	18.923	18.9788	19.032
20uM E2 vs. DMSO	Q9BSQ5	CCM2	Cerebral cavernous malformations 2 protein	-0.380741	1.23572	14.0089	13.7949	13.6306	13.6762	13.1659	13.1834	13.7696	13.4688
20uM E2 vs. DMSO	Q5T0N5	FNBP1L	Formin-binding protein 1-like	0.184438	1.23567	17.3591	17.433	17.3846	17.361	17.3679	17.6485	17.5156	17.7435
20uM E2 vs. DMSO	Q8TDN4	CABLES1	CDK5 and ABL1 enzyme substrate 1	-0.81019	1.2354	12.6733	13.7766	13.1539	13.6707	11.7558	13.3856	12.4347	12.4576
20uM E2 vs. DMSO	Q96FC9	DDX11	ATP-dependent DNA helicase DDX11	-0.463669	1.23489	12.4195	12.1455	12.2365	12.0191	11.6433	12.0905	11.746	11.4861
20uM E2 vs. DMSO	Q99623	PHB2	Prohibitin-2	0.704492	1.23427	14.2294	14.7532	14.694	14.8688	15.0696	14.5974	15.4298	16.2667
20uM E2 vs. DMSO	O60664	PLIN3	Perilipin-3	0.140239	1.23335	18.618	18.3539	18.4431	18.4227	18.603	18.5785	18.5864	18.6307
20uM E2 vs. DMSO	O75165	DNAJC13	DnaJ homolog subfamily C member 13	0.256509	1.23333	17.9235	18.0998	17.8391	17.6034	17.9679	18.1533	18.0339	18.3367
20uM E2 vs. DMSO	Q5VTR2	RNF20	E3 ubiquitin-protein ligase BRE1A	-0.162725	1.23149	17.4958	17.2721	17.3163	17.2536	17.1535	17.1849	17.0835	17.2652
20uM E2 vs. DMSO	P06703	S100A6	Protein S100-A6	-0.240358	1.23099	21.1735	20.9208	20.7285	20.9934	20.5548	20.7021	20.6483	20.9496
20uM E2 vs. DMSO	Q6W2J9	BCOR	BCL-6 corepressor	-0.276199	1.23046	14.8008	14.4315	14.7452	14.9279	14.3638	14.3887	14.5666	14.4815
20uM E2 vs. DMSO	Q9BY44	EIF2A	Eukaryotic translation initiation factor 2A	0.136833	1.23018	18.7074	18.6501	18.5649	18.5552	18.6393	18.7808	18.7649	18.84
20uM E2 vs. DMSO	O95260	ATE1	Arginyl-tRNA--protein transferase 1	-0.333578	1.22903	14.2021	13.6487	13.9511	14.006	13.702	13.7874	13.5351	13.449
20uM E2 vs. DMSO	Q13561	DCTN2	Dynactin subunit 2	0.155181	1.22895	19.0847	18.9168	18.8416	18.9756	19.0071	19.1033	19.0917	19.2373
20uM E2 vs. DMSO	P46934	NEDD4	E3 ubiquitin-protein ligase NEDD4	0.256695	1.22892	15.1484	15.0552	15.1149	15.2971	15.1947	15.6839	15.3832	15.3806
20uM E2 vs. DMSO	O43708	GSTZ1	Maleylacetoacetate isomerase	0.138061	1.22705	18.6129	18.56	18.5855	18.4499	18.5906	18.7232	18.6534	18.7934
20uM E2 vs. DMSO	O75909	CCNK	Cyclin-K	-0.118161	1.22663	17.902	17.8867	17.8004	17.8191	17.693	17.7952	17.7387	17.7085
20uM E2 vs. DMSO	P13010	XRCC5	X-ray repair cross-complementing protein 5	-0.118571	1.22643	21.3525	21.1964	21.3008	21.2121	21.1558	21.2166	21.0855	21.1296
20uM E2 vs. DMSO	O15511	ARPC5	Actin-related protein 2/3 complex subunit 5	0.223124	1.22643	19.0998	19.0976	18.9496	19.0367	19.0673	19.167	19.2741	19.5677
20uM E2 vs. DMSO	Q86X10	RALGAPB	Ral GTPase-activating protein subunit beta	0.25751	1.22635	17.6458	17.9102	17.8863	18.0187	18.3925	18.1933	17.936	17.9692
20uM E2 vs. DMSO	P49585	PCYT1A	Choline-phosphate cytidylyltransferase A	0.178892	1.2259	18.4341	18.2686	18.2254	18.2269	18.2858	18.569	18.4394	18.5763
20uM E2 vs. DMSO	Q08378	GOLGA3	Golgin subfamily A member 3	0.166275	1.22505	18.8095	18.8316	18.6151	18.5834	18.7924	18.8781	18.8418	18.9925
20uM E2 vs. DMSO	Q9NTW7	ZFP64	Zinc finger protein 64	-0.46956	1.2246	13.7118	13.3242	13.687	13.6179	13.2971	12.6646	12.9169	13.5841
20uM E2 vs. DMSO	Q8IXT5	RBM12B	RNA-binding protein 12B	-0.288718	1.22417	14.7568	14.7584	14.7869	15.1789	14.6758	14.3715	14.7048	14.5739
20uM E2 vs. DMSO	Q7L1Q6	BZW1	eIF5-mimic protein 2	-0.125351	1.22365	20.3897	20.3579	20.2456	20.2978	20.0899	20.2078	20.2099	20.282
20uM E2 vs. DMSO	Q9BPX6	MICU1	Calcium uptake protein 1, mitochondrial	0.540875	1.2235	13.9672	12.9755	13.9787	14.1564	14.4109	14.0836	14.3769	14.3699
20uM E2 vs. DMSO	O15498	YKT6	Synaptobrevin homolog YKT6	0.356771	1.22254	17.3607	17.4116	16.8789	17.1971	17.3202	17.7498	17.3161	17.8893
20uM E2 vs. DMSO	Q9BQ39	DDX50	ATP-dependent RNA helicase DDX50	-0.197544	1.22216	16.7472	16.6243	16.584	16.8025	16.2885	16.6183	16.521	16.54
20uM E2 vs. DMSO	Q99470	SDF2	Stromal cell-derived factor 2	0.174515	1.22207	15.2791	15.4185	15.3658	15.2637	15.4652	15.4396	15.5351	15.5853
20uM E2 vs. DMSO	Q96HD9	ACY3	N-acyl-aromatic-L-amino acid amidohydrolase (carboxylate-forming)	-0.469369	1.22179	14.7992	14.5477	14.118	14.3662	13.7782	14.5484	13.8879	13.7392
20uM E2 vs. DMSO	Q9H2F5	EPC1	Enhancer of polycomb homolog 1	-0.394573	1.2216	13.1432	13.1809	12.8618	12.7811	12.2708	12.6774	12.7643	12.6763
20uM E2 vs. DMSO	P51970	NDUFA8	NADH dehydrogenase [ubiquinone] 1 alpha subcomplex subunit 8	0.17815	1.22157	15.9637	16.0868	15.967	16.2046	16.1365	16.2946	16.2187	16.2849
20uM E2 vs. DMSO	Q53HC9	EIPR1	EARP and GARP complex-interacting protein 1	0.143562	1.22152	17.4363	17.3211	17.2338	17.3313	17.3963	17.4557	17.4825	17.5623
20uM E2 vs. DMSO	P21926	CD9	CD9 antigen	-0.200702	1.22048	16.4742	16.8179	16.6811	16.6321	16.5098	16.3588	16.5752	16.3587
20uM E2 vs. DMSO	Q6ZYL4	GTF2H5	General transcription factor IIH subunit 5	0.284266	1.21987	15.7698	16.2008	15.605	15.6882	16.0682	16.0762	16.025	16.2314
20uM E2 vs. DMSO	Q9BYV8	CEP41	Centrosomal protein of 41 kDa	-0.24363	1.21946	15.0395	14.7502	14.7691	14.8987	14.5145	14.8127	14.6141	14.5415
20uM E2 vs. DMSO	O14828	SCAMP3	Secretory carrier-associated membrane protein 3	0.330038	1.21924	14.6234	14.2471	14.7914	14.5685	14.6522	14.8621	14.8628	15.1735
20uM E2 vs. DMSO	Q9NRY5	FAM114A2	Protein FAM114A2	0.335883	1.21647	15.7176	15.7117	15.2281	15.6721	15.6009	15.8456	16.087	16.1395
20uM E2 vs. DMSO	Q13155	AIMP2	Aminoacyl tRNA synthase complex-interacting multifunctional protein 2	0.118733	1.21635	18.9767	19.02	18.9491	19.0054	19.1291	19.1756	19.132	18.9895
20uM E2 vs. DMSO	Q99714	HSD17B10	3-hydroxyacyl-CoA dehydrogenase type-2	0.170471	1.21623	20.6738	20.5827	20.6207	20.5314	20.7405	20.609	20.7591	20.982
20uM E2 vs. DMSO	Q9BZ67	FRMD8	FERM domain-containing protein 8	-0.188178	1.21587	15.1075	15.0524	15.204	15.2093	14.8515	14.9825	14.9607	15.0258
20uM E2 vs. DMSO	P19838	NFKB1	Nuclear factor NF-kappa-B p105 subunit	-0.14872	1.21537	16.1857	16.1224	16.0298	16.1062	15.9049	15.9684	15.9727	16.0034
20uM E2 vs. DMSO	Q9UKX7	NUP50	Nuclear pore complex protein Nup50	-0.275791	1.21456	18.5118	17.9927	18.5279	18.4496	18.103	18.1452	17.8997	18.231
20uM E2 vs. DMSO	Q14674	ESPL1	Separin	-0.423136	1.21309	14.4851	14.4494	14.4023	14.3677	14.1845	13.9643	14.4206	13.4426
20uM E2 vs. DMSO	Q9NVT9	ARMC1	Armadillo repeat-containing protein 1	0.223317	1.21225	16.3448	16.1236	16.0355	16.1805	16.1901	16.4218	16.3832	16.5827
20uM E2 vs. DMSO	P12104	FABP2	Fatty acid-binding protein, intestinal	0.388189	1.21211	13.1941	12.8024	12.9496	13.2799	13.1617	13.7268	13.5502	13.3401
20uM E2 vs. DMSO	Q9H3L0	MMADHC	Cobalamin trafficking protein CblD	-0.787784	1.21129	13.7418	13.7861	15.3884	14.955	13.4232	13.7927	13.8839	13.6203
[truncated: 4,136 more rows]
