# Supplementary material for: A Two-Dimensional Peptide-Centric Stability Assay Maps Multidimensional Target Landscapes Unveiling 17β-Estradiol (E2)-GPX4 Binding-Induced Ferroptosis
Source: Research Square preprint supplement (doi:10.21203/rs.3.rs-6893001/v1), 2025-07-04
Supplement: Supplementary file 13 [file b59cd2fc78d4694a4a2b88e2.xlsx]

## Sheet: Sheet1
Supplementary Table 9. Processed data set for 5 × 6 matrix thermal shift assay (mTSA) analysis of 17β-Estradiol (E2)
5×6 mTSA analysis of 17β-Estradiol (E2)
Protein.IDs	Gene.names	PG.ProteinDescriptions	NorIntensity_52_E2_000nM_Rep1	NorIntensity_52_E2_000nM_Rep2	NorIntensity_52_E2_000nM_Rep3	NorIntensity_52_E2_000nM_Rep4	NorIntensity_52_E2_000nM_Rep5	NorIntensity_52_E2_010nM_Rep1	NorIntensity_52_E2_010nM_Rep2	NorIntensity_52_E2_010nM_Rep3	NorIntensity_52_E2_010nM_Rep4	NorIntensity_52_E2_010nM_Rep5	NorIntensity_52_E2_100nM_Rep1	NorIntensity_52_E2_100nM_Rep2	NorIntensity_52_E2_100nM_Rep3	NorIntensity_52_E2_100nM_Rep4	NorIntensity_52_E2_100nM_Rep5	NorIntensity_52_E2_001uM_Rep1	NorIntensity_52_E2_001uM_Rep2	NorIntensity_52_E2_001uM_Rep3	NorIntensity_52_E2_001uM_Rep4	NorIntensity_52_E2_001uM_Rep5	NorIntensity_52_E2_010uM_Rep1	NorIntensity_52_E2_010uM_Rep2	NorIntensity_52_E2_010uM_Rep3	NorIntensity_52_E2_010uM_Rep4	NorIntensity_52_E2_010uM_Rep5	NorIntensity_52_E2_100uM_Rep1	NorIntensity_52_E2_100uM_Rep2	NorIntensity_52_E2_100uM_Rep3	NorIntensity_52_E2_100uM_Rep4	NorIntensity_52_E2_100uM_Rep5	Average_Intensity_000nM	Average_Intensity_010nM	Average_Intensity_100nM	Average_Intensity_001uM	Average_Intensity_010uM	Average_Intensity_100uM	Average_000nM_000nM	Average_010nM_000nM	Average_100nM_000nM	Average_001uM_000nM	Average_010uM_000nM	Average_100uM_000nM	Transformed_Intensity_52_E2_Mean_000nM	Transformed_Intensity_52_E2_Mean_010nM	Transformed_Intensity_52_E2_Mean_100nM	Transformed_Intensity_52_E2_Mean_001uM	Transformed_Intensity_52_E2_Mean_010uM
P55263	ADK	Adenosine kinase	263650	252854	255376	256800	257378	256086	236170	251812	251984	234712	260897	260989	266644	251424	237264	271072	279898	256436	259714	262557	277936	282721	285823	289194	244521	364678	390280	370949	409510	357756	257212	246153	255443	265935	276039	378635	1	0.957006	0.993126	1.03392	1.0732	1.47208	0	-0.0910746	-0.0145611	0.0718449	0.155056
P36969	GPX4	Phospholipid hydroperoxide glutathione peroxidase GPX4	83394.1	78757.8	78720.5	89319.8	96965	88541.5	90328.4	81597.6	97542.4	90531.8	92557.4	85131.9	89510.4	100957	78179.1	95081.2	101916	108820	96386.8	107153	115107	116905	100066	100137	121219	132568	127297	132274	129437	131235	85431.4	89708.3	89267.2	101871	110687	130562	1	1.05006	1.0449	1.19243	1.29563	1.52827	0	0.0947671	0.0849924	0.364274	0.559611
Q16698	DECR1	2,4-dienoyl-CoA reductase [(3E)-enoyl-CoA-producing], mitochondrial	278257	269874	263455	261011	279313	257148	239572	264231	253288	260636	270526	273076	274422	277903	254177	274924	280205	299043	277024	286064	284677	283112	277409	278198	278493	346065	363114	354675	392630	362301	270382	254975	270021	283452	280378	363757	1	0.943017	0.998664	1.04834	1.03697	1.34534	0	-0.165004	-0.00386975	0.139974	0.107048
P35270	SPR	Sepiapterin reductase	53314.9	58433.6	60375.9	56099.9	66451	62983.4	64686	57616.4	60165.5	64781.4	63724.1	64363	58296.5	69255.5	60129.5	59287.9	63769.7	69865.7	67171.9	69138	67316	69213.7	66158.6	67034.8	69247.6	88360.3	89520.5	93315.5	98044.2	84960.9	58935.1	62046.5	63153.7	65846.7	67794.1	90840.3	1	1.0528	1.07158	1.11727	1.15032	1.54136	0	0.0975227	0.132225	0.216629	0.277669
O43815	STRN	Striatin	45083.5	51035.4	43399.6	39116.3	60507.1	75932.7	81078.6	94184.7	94549.8	84079.6	84581.2	89718.6	90645.8	35583.6	79825.1	100465	93518.9	83494.4	38518.7	38388.6	41335.8	40059.5	40668.5	43355.3	36890.7	85149.1	79633.2	80246.4	87950.9	85063.5	47828.4	85965.1	76070.8	70877.1	40462	83608.6	1	1.79737	1.5905	1.4819	0.845983	1.7481	0	1.06586	0.789331	0.644174	-0.205878
O60271	SPAG9	C-Jun-amino-terminal kinase-interacting protein 4	57852.7	66582.6	55612.5	56562	58352.2	86917.5	79220.9	68792.7	86917.5	91499.3	77591	91656.7	91830.3	54970	89221.6	91282.9	86307.3	90743.6	53635.3	60907	60259.9	59995.7	62507.1	61856.4	59272.9	95551.9	100531	96771.5	75584.4	92226.9	58992.4	82669.6	81053.9	76575.2	60778.4	92133.1	1	1.40136	1.37397	1.29805	1.03028	1.56178	0	0.714445	0.665693	0.530551	0.0538916
P51649	ALDH5A1	Succinate-semialdehyde dehydrogenase, mitochondrial	83252	82786.2	80587.1	75967	67698.7	74878.8	73383.8	85317.3	81933.4	74089	77762.3	78268.7	79746.4	79087.7	72277.7	80484	83211.2	79709.3	82112.8	79485.2	74055.2	76343.4	75246.4	79584.3	69097.7	56506.2	52239.8	54232.2	53664	58584.4	78058.2	77920.4	77428.6	81000.5	74865.4	55045.3	1	0.998235	0.991934	1.03769	0.959097	0.705183	1	0.994014	0.972639	1.12786	0.861261
Q9H4A6	GOLPH3	Golgi phosphoprotein 3	84824.8	82963.9	89065.5	80671.8	81891.5	75891.2	78384.2	81266.5	78217.7	72326.1	76495.5	77625.5	81504.2	74915.8	75952	85182.4	89276.2	82480.8	84884.2	79235.2	85740.8	83952	82715.4	76502.9	75238.1	66375.6	65921.6	69328.3	67358.7	67968	83883.5	77217.1	77298.6	84211.8	80829.9	67390.5	1	0.920529	0.9215	1.00391	0.963597	0.803382	1	0.595808	0.600749	1.0199	0.814854
P30084	ECHS1	Enoyl-CoA hydratase, mitochondrial	226041	219523	213256	226062	200035	206685	202675	202349	178029	170161	227117	213347	201888	191076	202302	225797	211126	207047	203872	196597	223281	249349	239608	234132	230559	261243	284052	285870	294904	262898	216983	191980	207146	208888	235386	277793	1	0.884767	0.954664	0.962691	1.08481	1.28025	0	-0.411175	-0.161769	-0.133127	0.302622
P40939	HADHA	Trifunctional enzyme subunit alpha, mitochondrial	165031	176137	174609	164079	179351	166412	180516	165139	160818	173070	186736	183006	185444	181074	174095	190458	202253	205945	195886	193338	189739	194387	184301	182143	179988	207478	197517	210381	207954	210609	171841	169191	182071	197576	186112	206788	1	0.984577	1.05953	1.14976	1.08304	1.20336	0	-0.0758381	0.292716	0.7364	0.408345
P06756	ITGAV	Integrin alpha-V	465.632	699.545	537.748	470.375	2176.95	2466.15	2496.71	282.422	3839.3	3431.06	1788.58	2029.15	2448.55	2755.48	5292.9	5237.21	595.607	824.076	2501.89	484.165	3584.36	2379.18	3990.97	414.021	4110.26	3511.33	4654.27	3432.07	6741.18	4091.62	870.05	2503.13	2862.93	1928.59	2895.76	4486.1	1	2.877	3.29054	2.21664	3.32827	5.15614	0	0.451621	0.551122	0.292734	0.5602
P27707	DCK	Deoxycytidine kinase	42488.1	37543	40083.5	36257	36948.6	43433.3	40723.1	40132.7	44791.2	40115.9	38356	39787.7	39643.5	41087.7	39775.4	39677.5	39148.4	40289.9	39040.7	42751.6	45040	37880.2	42548.3	42971.8	45897.5	49708.7	50612.5	46772.2	54020.6	48713.5	38664.1	41839.2	39730.1	40181.6	42867.6	49965.5	1	1.08212	1.02757	1.03925	1.10872	1.2923	0	0.280954	0.0943249	0.13428	0.371943
A6NIH7	UNC119B	Protein unc-119 homolog B	65308.7	58357.3	55879	61804.3	57342.2	57078.8	57285.8	65536.6	59842.5	56377.2	58251.6	60039	55352.1	53798.4	55138.4	55392.9	55836.7	59517	58212.3	59654.5	63957.2	63756	60110.9	67230.4	64549.7	74314.8	74965.1	72829.6	87068.8	79937.7	59738.3	59224.2	56515.9	57722.7	63920.8	77823.2	1	0.991393	0.946058	0.966259	1.07001	1.30274	0	-0.0284296	-0.178182	-0.111453	0.231271
Q14914	PTGR1	Prostaglandin reductase 1	76722.7	78870.9	72999.3	82713.2	77809.2	73875	60474.2	70667.8	69964.1	64072.3	91957.2	78701.8	81537.7	75819.4	75267.1	86259.6	81140.6	72449.2	76770.5	72137.5	90864.3	90396.8	99267	104123	83257.7	115379	126440	119890	129863	88682.6	77823.1	67810.7	80656.6	77751.5	93581.8	116051	1	0.871344	1.03641	0.999081	1.20249	1.49121	0	-0.261915	0.0741239	-0.00187156	0.412234
P55060	CSE1L	Exportin-2	1.02941e+06	994059	968731	1.005e+06	903251	1.0646e+06	1.012e+06	1.00741e+06	1.09613e+06	919059	1.00615e+06	939300	1.04615e+06	1.02721e+06	866517	952047	965798	1.05768e+06	929800	958574	977628	956260	903821	962888	816269	799500	716043	840314	715242	819303	980090	1.01984e+06	977064	972781	923373	778080	1	1.04056	0.996913	0.992543	0.942131	0.793887	1	1.19678	0.985023	0.963819	0.719238
Q9Y6E2	BZW2	eIF5-mimic protein 1	190111	182811	183411	180959	174737	191751	190111	196187	189390	180597	194946	185678	197742	189574	173421	194310	200836	207452	192339	202890	184950	203713	190322	181543	192836	154522	147626	154260	144686	166003	182406	189607	188272	199565	190673	153419	1	1.03948	1.03216	1.09407	1.04532	0.841088	1	1.24844	1.20238	1.59199	1.28521
Q9BYD2	MRPL9	Large ribosomal subunit protein bL9m	17316.9	20804.7	15514.2	20116.8	24787.1	30723.2	34556.4	20627.9	29649.3	29399.2	27435.4	22875.5	29749.2	24899.6	20608.2	30203.8	22008.6	37456.2	25837.2	28797.3	17934.5	22918.5	23131.4	19069.5	26004.7	30348.2	30648.5	30948.1	28026.1	34716.4	19707.9	28991.2	25113.6	28860.6	21811.7	30937.4	1	1.47104	1.27429	1.46442	1.10675	1.5698	0	0.826688	0.481379	0.815058	0.187343
Q9UIA9	XPO7	Exportin-7	178868	172917	177201	167043	155896	194814	169578	196267	169293	167725	155810	155541	167381	169388	169621	157037	157623	150439	156646	171263	176840	170342	152032	182472	142753	144699	139918	141278	143594	126450	170385	179536	163548	158602	164888	139188	1	1.05371	0.959875	0.930844	0.967737	0.816902	1	1.29332	0.780855	0.622303	0.823793
Q8IV36	HID1	Protein HID1	75907.1	73096.8	76843.9	67627.5	62424.8	76458.8	76393	82675.7	76329.1	74502.1	67492.7	60718.9	72154.8	77997.9	69500.3	67422.6	64869.1	69602.2	67768.6	74784.9	74530.8	74543.8	69492.3	72518.6	66205.7	55618.8	56180	58072.1	56015.3	55727.4	71180	77271.7	69572.9	68889.5	71458.2	56322.7	1	1.08558	0.977422	0.96782	1.00391	0.791272	1	1.41001	0.89183	0.845829	1.01872
O43598	DNPH1	5-hydroxymethyl-dUMP N-hydrolase	127862	133452	132770	115652	131224	285170	306675	139695	282810	120599	241988	136222	230767	115024	154172	205912	199497	160550	123106	114072	116064	130872	129246	142820	117390	237844	375801	275200	160005	333622	128192	226990	175635	160627	127278	276494	1	1.7707	1.37009	1.25302	0.992874	2.15688	0	0.666192	0.319904	0.218712	-0.00615957
Q7Z3C6	ATG9A	Autophagy-related protein 9A	9740.01	10339.7	9729.67	8245.66	9256.83	13094.7	15042	14042.4	5147.5	15159.7	14124.2	16213.6	12119.7	13969	13807.9	13810.7	12989.2	14012.5	9971.56	9024.17	13651.3	11863.9	8924.94	17335.9	15047.8	12891.8	16995.3	13184.9	15916.8	12087.7	9462.37	12497.2	14046.9	11961.6	13364.8	14215.3	1	1.32073	1.4845	1.26413	1.41241	1.5023	0	0.63852	0.96456	0.525833	0.821045
Q8WX92	NELFB	Negative elongation factor B	101369	95621.2	109236	93932.1	94330.4	98893.2	98337.3	103752	95888.7	92148.6	89039.6	90183.1	96303.9	95734.1	97631.3	98206.3	95197.2	91395.8	95412.6	93117.8	103001	100354	97238.4	101095	92790.6	83288.5	84374.6	82808.7	83110.4	76998.9	98897.8	97804	93778.4	94665.9	98896	82116.2	1	0.988941	0.948236	0.95721	0.999982	0.830314	1	0.934824	0.694941	0.747828	0.999892
O75683	SURF6	Surfeit locus protein 6	9127.75	7909.07	8000.95	9375.01	8811.56	10231.9	11127.2	11360.5	7990.86	10172.6	8599.08	10513.9	10833.6	9756.52	9648.85	8777.63	10304.7	11990.3	8375.73	11653.3	9739.62	8068.02	10135.5	10075.8	10560.7	12289.5	10737.1	11241.7	11287.7	12515.2	8644.87	10176.6	9870.38	10220.4	9715.94	11614.2	1	1.17719	1.14176	1.18225	1.1239	1.34348	0	0.515848	0.412716	0.530578	0.360708
P10515	DLAT	Dihydrolipoyllysine-residue acetyltransferase component of pyruvate dehydrogenase complex, mitochondrial	177360	157853	159571	165644	166383	185071	174525	193211	178589	204694	167235	180568	179783	171898	194684	166411	174471	171035	164410	181965	176795	181022	167560	187131	182046	184329	190686	188341	200449	197435	165362	187218	178834	171659	178911	192248	1	1.13217	1.08147	1.03808	1.08193	1.16259	0	0.812906	0.501059	0.234192	0.503924
Q6NVY1	HIBCH	3-hydroxyisobutyryl-CoA hydrolase, mitochondrial	111928	106170	106633	103374	97597.9	113685	107723	119424	113062	105311	106887	111407	110785	104112	107432	107607	115219	113358	108637	108488	119230	118251	110944	126361	104848	122525	121878	124835	139390	122377	105140	111841	108125	110662	115927	126201	1	1.06373	1.02838	1.05252	1.10259	1.20031	0	0.318169	0.141695	0.262168	0.512157
O75376	NCOR1	Nuclear receptor corepressor 1	51663.7	53404.2	44596.1	46518	59908.8	37822.7	49682.3	45103.9	38381	39940	38092.4	33200.1	34259	39410	40217.1	52531	47406.7	41408.2	40447.5	32269.4	42890.2	31780.6	38767.4	51310.6	38810.1	39455.8	37514.7	36259	41135.8	38412.2	51218.2	42186	37035.7	42812.5	40711.8	38555.5	1	0.823653	0.723098	0.835886	0.79487	0.75277	1	0.286708	-0.120017	0.336189	0.170288
Q96N03	VSTM2L	V-set and transmembrane domain-containing protein 2-like protein	9568.16	6140.7	6072.17	8480.33	10967.9	13977.4	12385.7	14230.3	12176.6	13856.4	11766.6	13440.7	13188.2	13038.6	12368.4	13081.3	10702	11311.8	8563.23	9943.16	12209.6	13847.5	11463.1	14675.8	13181.6	13343.8	14698.9	14095	16353.2	13490.1	8245.85	13325.3	12760.5	10720.3	13075.5	14396.2	1	1.616	1.54751	1.30008	1.58571	1.74587	0	0.825881	0.734049	0.402325	0.785273
P49841	GSK3B	Glycogen synthase kinase-3 beta	78081.7	76046.6	77397.4	80075.2	80974.1	85747.3	85218.9	84562.4	89570.9	90412.7	80115.1	78302.8	86447.5	95452.1	74168.9	83900.2	79246.3	93601.2	86631.8	89291.9	84763.3	86788.6	82751.4	91885.1	98147.5	93415.7	87193.6	88457.8	87957.6	93166.9	78515	87102.4	82897.3	86534.3	88867.2	90038.3	1	1.10937	1.05581	1.10214	1.13185	1.14677	0	0.745219	0.380295	0.695917	0.898368
P35609	ACTN2	Alpha-actinin-2	3208.06	4882.93	5123.72	1875.39	8984.4	9742.14	13054.5	16164.9	11903.2	16611.7	11306.4	10957.5	11659.8	11376	17412.6	12672.6	13164.9	9180.81	11836.7	6414.88	4663.23	10479	12253	15789.2	4013.71	13848.9	14377.4	12437.3	14802	12444.1	4814.9	13495.3	12542.5	10654	9439.63	13581.9	1	2.80282	2.60492	2.21271	1.9605	2.82081	0	0.990117	0.881432	0.666026	0.527513
Q9BYG4	PARD6G	Partitioning defective 6 homolog gamma	20008.4	24230	22837.6	21360.2	22084.9	23802.5	21251.4	21868.6	23149.8	23881.7	24933.7	25114.2	24773.8	25428	25129.9	22995.2	24847.4	24874.3	22628.2	25939.9	25692.1	25436.7	24082.8	26582.2	26033.6	26752.1	26315.5	27514.1	30947.5	29698.1	22104.2	22790.8	25075.9	24257	25565.5	28245.5	1	1.03106	1.13444	1.09739	1.15659	1.27783	0	0.111801	0.483893	0.350547	0.563612
Q04756	HGFAC	Hepatocyte growth factor activator	13588.6	12160.3	13703.5	12709.1	13426.5	13520.7	13784.6	16957.3	12485.2	13209.9	13353	12608.6	12772.8	10449.8	15142.9	14198.4	12184.3	14484.7	15042.7	14062	14192.1	10122.6	14875.6	18568.1	15127.6	15162.5	16472	18870.6	16820.5	18763.8	13117.6	13991.5	12865.4	13994.4	14577.2	17217.9	1	1.06662	0.980775	1.06684	1.11127	1.31258	0	0.213144	-0.0615037	0.213847	0.355974
Q15643	TRIP11	Thyroid receptor-interacting protein 11	53560.7	56707.6	58318	51340.7	48704.2	61817.4	55332.9	63965.9	57916.8	66949.3	60459.6	57503.1	61989.5	59125.5	65751.2	62686.3	54808.3	58723	56057.9	57309.1	59554.5	62052.2	61957.8	67260.2	65215.1	64915.9	65653.5	62313.6	73349.2	65396.7	53726.2	61196.5	60965.8	57916.9	63207.9	66325.8	1	1.13904	1.13475	1.078	1.17648	1.23451	0	0.592897	0.574587	0.332607	0.752545
P05976;P08590	MYL1;MYL3	Myosin light chain 1/3, skeletal muscle isoform;Myosin light chain 3	57258.8	45740.1	31945.4	29814.9	48303.4	68252.7	58472.1	124027	74600	84936.1	75794.1	60528.8	110166	57498.4	70290.7	76071.7	95856.1	97577.3	44073.8	38815.1	43318.8	50882	47280.1	89503.4	86549.2	65185.1	77989.6	71106.9	94101.1	121027	42612.5	82057.5	74855.6	70478.8	63506.7	85882	1	1.92567	1.75666	1.65395	1.49033	2.01542	0	0.911612	0.745169	0.644017	0.482885
Q9P1U0	POLR1H	DNA-directed RNA polymerase I subunit RPA12	2094.32	1836.59	2655.54	2528.9	2972.15	1454.18	2598.55	2915.69	4214.08	5323.62	2369.27	2255.8	1914.44	2800.53	2892.42	3404.1	1951.98	3612.32	2657.5	2405.26	3917.99	2848.1	3661.91	3745.52	4368.28	3969.91	4054.35	4257.14	5282.84	3510.76	2417.5	3301.23	2446.49	2806.23	3708.36	4215	1	1.36556	1.01199	1.1608	1.53397	1.74354	0	0.491642	0.0161303	0.216263	0.718141
P12035	KRT3	Keratin, type II cytoskeletal 3	13217.4	19674.1	17859.6	16289.7	14073	8445.51	7198.03	7356.21	9269.55	12618.7	7300.15	12923.3	17891.2	51565	9177.49	11269.1	9345.04	6396.45	10781.5	9854.33	8435.56	11584.8	11344.3	11373	5847.82	7803.23	8364.46	11549.1	11912.5	9687.61	16222.7	8977.59	19771.4	9529.27	9717.08	9863.39	1	0.553395	1.21875	0.587402	0.598979	0.607998	1	-0.139291	1.55802	-0.0525402	-0.023007
Q9Y2J4	AMOTL2	Angiomotin-like protein 2	7846.02	7330.85	7911.41	7761.92	7745.02	9425.96	9011.08	10122.8	9200.5	10540	8253.33	8727.79	8588.14	7337.9	9998.17	9280.82	7749.79	7662.15	8272.09	8032.34	7920.54	8182.29	8419.1	8371.48	9015.09	9306.73	10759.2	10046.2	10891.5	9263.99	7719.05	9660.08	8581.07	8199.44	8381.7	10053.5	1	1.25146	1.11167	1.06223	1.08585	1.30243	0	0.831463	0.369256	0.205782	0.283856
Q5VW32	BROX	BRO1 domain-containing protein BROX	16290.8	17007.1	14143.9	19280.7	17997.6	16333.1	17074.7	19978.5	17848.8	16324.5	19786.6	19693	15298.3	20719.3	12280	20045.5	20309.1	21023.7	15598.7	17273.7	15674.8	15813.1	19368.6	18746.3	14353.4	12204.3	9015.66	12779.5	9686.92	12678.4	16944	17511.9	17555.5	18850.1	16791.2	11273	1	1.03352	1.03609	1.11249	0.990983	0.665306	1	1.10014	1.10782	1.33611	0.973059
Q9Y2R9	MRPS7	Small ribosomal subunit protein uS7m	37443.8	63197.5	35526.7	41532.6	64268.4	74886.9	76808.2	82693	80807.9	81576	79769.7	80335.2	72333	85417.4	85482.2	73558.7	67002.8	76544.3	48485	54474.3	40484.6	61255.4	75722.6	49695.7	61927.4	72616.1	79619.6	81120.7	94794.4	89196	48393.8	79354.4	80667.5	64013	57817.1	83469.4	1	1.63976	1.6669	1.32275	1.19472	1.72479	0	0.882683	0.920119	0.445302	0.268658
Q9BW04	SARG	Specifically androgen-regulated gene protein	45459.9	60913.7	46407.2	60587.2	54850	72370.4	59341	70460.8	65756.9	64890.7	32371.9	69236.6	64403.2	67710.3	63269.3	30803.6	54887.8	50205.4	57181.6	54193.2	74249.4	70740.1	69931.3	73591.1	60877.5	74317.6	65630.9	75448.8	77126.2	69762.8	53643.6	66564	59398.3	49454.3	69877.9	72457.3	1	1.24086	1.10728	0.921905	1.30263	1.35072	0	0.686755	0.305876	-0.222672	0.862899
Q9Y2X3	NOP58	Nucleolar protein 58	23863.5	24268.6	24771.9	21918.2	25767.6	23124.7	23379.1	29758.2	25775	28682	26993.8	24343.2	27469.7	23684.4	25803.7	28404.9	26437.6	31431.6	28258.3	27390.8	27587.2	29537.5	25994.7	28797.7	28176.6	29663	28721.4	27556.1	29457.1	30642.5	24118	26143.8	25658.9	28384.6	28018.7	29208	1	1.084	1.06389	1.17691	1.16174	1.21105	0	0.398	0.302744	0.838236	0.766354
Q9UBB4	ATXN10	Ataxin-10	93598	90650.3	84168.7	76530.2	84752.9	86206.5	80324.8	88182.4	89754.6	82986.9	85104.5	81748.7	89111.7	80182.2	84591.6	88883	87499.3	77860.4	73958.8	83387.4	88108	87329.1	83074.2	89741.3	76705.9	71924.6	70985.2	73476.5	70200.4	71939.2	85940	85491.1	84147.7	82317.8	84991.7	71705.2	1	0.994776	0.979145	0.957851	0.988966	0.834363	1	0.968461	0.874092	0.745536	0.933382
Q7Z3T8	ZFYVE16	Zinc finger FYVE domain-containing protein 16	10945.1	19625.7	11271	11446.7	9595.91	23944	23242.2	13185.2	17037.8	26873.5	18555.3	23724.5	17261.9	23096	24984.9	24218.7	23211.2	18972.6	13574.2	15096.6	11459.2	16731.4	25615.4	13623.1	25143.2	21174.8	23655.7	18285	25920.4	20544.2	12576.9	20856.5	21524.5	19014.7	18514.5	21916	1	1.65832	1.71143	1.51187	1.4721	1.74256	0	0.886553	0.958077	0.689331	0.635772
P41743	PRKCI	Protein kinase C iota type	28544.9	28525.4	29244	29369.3	30804.9	33008.9	30166.6	29892.9	30449.1	30857	31979	31511.7	32039.3	31793.8	29750.8	28073.7	29554.2	32585.9	33084.2	33249.9	30250.8	32522.6	29080.5	34242.4	29921.3	33187.3	32771.2	34646.4	34786.6	36127.9	29297.7	30874.9	31414.9	31309.6	31203.5	34303.9	1	1.05383	1.07227	1.06867	1.06505	1.17087	0	0.315051	0.422919	0.401882	0.38069
Q9NVA1	UQCC1	Ubiquinol-cytochrome c reductase complex assembly factor 1	45272.8	46542.3	53098.3	45988.4	48340.8	45144.4	44345.8	47346.1	47677.3	48777.6	46213.1	44685.3	44114.4	40991	43043.4	49143.7	47464.9	42077.5	49614.5	47000.5	44498.2	50840.9	54177.5	48508.7	53052.4	37771.9	39311.4	40324.4	41904.1	40780.8	47848.5	46658.3	43809.5	47060.2	50215.6	40018.5	1	0.975124	0.915586	0.983525	1.04947	0.836358	1	0.847986	0.484157	0.899321	1.3023
P46736	BRCC3	Lys-63-specific deubiquitinase BRCC36	33459.6	41855.6	27227.3	31372.4	34610.4	42192	38506.8	44713.4	40759.4	44719.8	39861	43648.3	42108.7	34791.4	44580.9	37925.4	38866.8	39473.9	27661.3	29387.5	30189.3	30614.2	29458.7	34531.4	31007.9	46378.6	47006.8	41329.2	52085	46888.5	33705.1	42178.3	40998.1	34663	31160.3	46737.6	1	1.25139	1.21638	1.02842	0.924499	1.38667	0	0.650156	0.559596	0.0734997	-0.195262
O75164	KDM4A	Lysine-specific demethylase 4A	10526.5	12200.1	11619.9	11131.2	11653.5	14144.3	13725.7	15303.8	14211.7	14972.1	12773.5	13581.2	13381.9	14116.7	15284.4	12356.6	11916.2	11980.8	11253.8	13463.3	13291.3	10694.1	14248.3	13707.3	16036.1	14101	14320.5	14366	14350.1	13257.3	11426.2	14471.5	13827.6	12194.1	13595.4	14079	1	1.26652	1.21016	1.06721	1.18984	1.23216	0	1.14798	0.905226	0.289476	0.817717
P49748	ACADVL	Very long-chain specific acyl-CoA dehydrogenase, mitochondrial	521682	499239	528812	501966	476809	447131	426806	494429	436072	449472	460576	477576	496213	449932	472595	526416	520415	478135	500559	481961	516806	530425	480523	514914	482714	433632	446239	438418	471308	412194	505702	450782	471379	501497	505077	440358	1	0.891399	0.932127	0.991686	0.998764	0.870786	1	0.159525	0.474727	0.935653	0.990432
Q9HC10	OTOF	Otoferlin	1672.22	1836.85	2620.37	1333.56	1688.21	1219.31	1433.73	2343.69	786.289	1203.93	911.51	1584	1234.48	1820.05	1123.31	1842.05	1410.38	1142.24	1510.18	1250.68	957.706	2472.87	2042.77	1913.54	245.745	657.511	965.952	1101.86	878.756	673.812	1830.24	1397.39	1334.67	1431.11	1526.53	855.577	1	0.7635	0.729231	0.781923	0.834057	0.467467	1	0.555896	0.491546	0.590491	0.688389
Q562R1	ACTBL2	Beta-actin-like protein 2	281667	235987	189004	181066	162960	128209	146298	122367	133384	111975	148203	132766	121110	178711	127638	246167	305520	153504	160499	184321	193770	201487	207065	146305	159903	143620	127144	130480	135820	146906	210137	128446	141686	210002	181706	136794	1	0.611251	0.674254	0.99936	0.864703	0.650976	1	-0.113817	0.0666963	0.998167	0.612357
P53803	POLR2K	DNA-directed RNA polymerases I, II, and III subunit RPABC4	19262.8	29808.4	22868.5	19812.4	29989.5	34100	26268.6	29848.7	29437.6	34306.5	29622.9	32891.6	31411.6	31601.1	33378.9	21726.8	30350.5	26320.7	24391.7	20084.8	30657.9	26582.8	32619.3	34006.2	32692.9	33785.5	35377.4	34854.2	40235.7	36735.1	24348.3	30792.3	31781.2	24574.9	31311.8	36197.6	1	1.26466	1.30527	1.00931	1.28599	1.48666	0	0.543829	0.627289	0.0191223	0.587673
Q9BUL8	PDCD10	Programmed cell death protein 10	119363	118066	128145	121846	122759	130681	127176	135612	123074	137175	128872	124991	130640	127074	137903	128714	117027	125472	124838	127836	134121	128007	128592	131423	131515	134118	136604	138567	140143	133344	122036	130743	129896	124777	130732	136555	1	1.07135	1.06441	1.02246	1.07126	1.11898	0	0.599724	0.54136	0.188819	0.598914
Q96DB5	RMDN1	Regulator of microtubule dynamics protein 1	305164	291347	307495	292102	277665	274296	279778	294919	286324	259559	293967	295825	291204	270064	257137	308753	302042	304145	302715	283041	270904	297538	298288	282655	263989	269208	269762	257629	253161	251962	294755	278975	281639	300139	282675	260345	1	0.946465	0.955504	1.01827	0.959017	0.883258	1	0.541425	0.618849	1.15648	0.648946
P21283	ATP6V1C1	V-type proton ATPase subunit C 1	117794	115733	123700	104490	113540	111289	105440	110868	106757	114539	109632	104117	115644	105425	108566	111536	112596	110769	106461	111457	124915	106176	103127	114866	99447.4	99794	101285	97334.3	100550	91664.7	115052	109779	108677	110564	109706	98125.6	1	0.95417	0.944592	0.960993	0.953541	0.852884	1	0.688476	0.623374	0.734855	0.684202
Q96KG9	SCYL1	N-terminal kinase-like protein	120778	117050	117209	113521	114724	131317	116360	130823	125528	117148	116654	123191	123532	118379	118611	114495	112086	117094	120632	117591	117263	125759	113420	130495	116877	105436	102218	106541	107066	100904	116656	124235	120074	116380	120763	104433	1	1.06497	1.02929	0.997629	1.0352	0.89522	1	1.62006	1.27957	0.97737	1.33597
O75648	TRMU	Mitochondrial tRNA-specific 2-thiouridylase 1	3205.19	3678.89	2457.77	2519.74	2536.02	3908.02	4907.81	4305.07	4757.74	4265.65	5154.4	2892.1	3444.39	4319.59	4399.56	4685.49	4982.2	7096.69	3110.26	4296.66	3516	4685.46	4639.88	3837.47	4961.4	4656.39	3656.93	4730.54	4732.71	4980.23	2879.52	4428.86	4042.01	4834.26	4328.04	4551.36	1	1.53805	1.40371	1.67884	1.50304	1.5806	0	0.926726	0.695334	1.16921	0.866424
O76074	PDE5A	cGMP-specific 3',5'-cyclic phosphodiesterase	3045.26	4525.15	4432.72	3367.69	9406.5	7819.02	8978.1	9913.87	15550.2	8924.46	8803.8	10266.6	13950.6	6076.31	2850.29	8337.56	9871.49	8119.98	6047.5	11159.6	9739.42	4233.69	8109.3	4864.28	4975.71	12096.5	8945.46	9566.42	12013.3	9242.79	4955.47	10237.1	8389.51	8707.23	6384.48	10372.9	1	2.06583	1.69298	1.7571	1.28837	2.09322	0	0.974943	0.633891	0.692539	0.263782
Q9Y365	STARD10	START domain-containing protein 10	723106	666475	697084	642222	640280	627195	610398	662359	653359	609657	629982	658077	662497	608126	658298	678726	673193	581941	655060	652192	644616	633458	658898	732927	640632	599654	603660	601257	590389	556966	673833	632593	643396	648222	662106	590385	1	0.938798	0.95483	0.961992	0.982597	0.876159	1	0.505803	0.635255	0.693092	0.85947
P55084	HADHB	Trifunctional enzyme subunit beta, mitochondrial	308210	297318	304826	323386	355350	327011	325946	310825	349037	325585	339263	332485	327155	352943	303135	332333	364068	382705	338140	377240	341177	344659	316249	354382	322408	396204	344509	376515	372896	407106	317818	327681	330996	358897	335775	379446	1	1.03103	1.04146	1.12925	1.0565	1.19391	0	0.16004	0.213835	0.666564	0.291376
O75340	PDCD6	Programmed cell death protein 6	225419	225241	233595	223914	224425	211658	214220	231759	209935	219640	224177	225968	231264	219288	215259	228479	234840	250404	243136	241554	234177	245581	239641	228098	224538	198272	199166	195041	218109	202002	226519	217442	223191	239683	234407	202518	1	0.95993	0.985311	1.05811	1.03482	0.894046	1	0.621821	0.861363	1.54848	1.32867
Q8WWB7	GLMP	Glycosylated lysosomal membrane protein	1306.41	989.375	1023.38	1998.21	510.864	332.91	2536.69	2562.54	607.496	3138.76	1104.32	377.145	3072.13	1771.83	995.408	1142.58	2032.3	3319.22	1458.77	406.853	2010.21	3125.55	1927.36	2319.55	1129.97	3445.68	2002.2	2868.02	2591.67	4174.39	1165.65	1835.68	1464.17	1671.95	2102.53	3016.39	1	1.57482	1.2561	1.43435	1.80374	2.58774	0	0.362034	0.161297	0.273565	0.506218
Q8NHV4	NEDD1	Protein NEDD1	26342	39780.6	22547.9	34889.1	36044.3	47809.5	41999.3	40492.3	41808.2	34826.4	45304.7	45254.3	40094.4	38508.2	47192.6	41871.2	29794.3	42700.7	18346.5	19009.4	28506.4	48560	44708	29864.6	24955	45318.2	47254.4	46214.8	47238.2	49391.6	31920.8	41387.1	43270.8	30344.4	35318.8	47083.4	1	1.29656	1.35557	0.950616	1.10645	1.47501	0	0.62432	0.748553	-0.103964	0.224104
Q99504	EYA3	Eyes absent homolog 3	10562.1	18564.8	11657.7	14324.6	20582.6	26588.4	23954	22140.9	20418.4	23970.8	23654.9	23844.5	24417.2	26088.8	23311	25116.8	19305.3	27890.8	10979	14338.9	18776.9	23389.2	24620.8	19425.1	25333.7	23907	23738.3	23109	24431.1	24821.9	15138.4	23414.5	24263.3	19526.2	22309.1	24001.5	1	1.5467	1.60277	1.28985	1.47368	1.58547	0	0.933771	1.02954	0.495063	0.80906
Q99436	PSMB7	Proteasome subunit beta type-7	779848	771442	807285	800332	794169	776747	765168	845170	800703	886792	774395	813754	799005	778274	886834	773495	800921	715092	781506	843237	847181	833700	795335	912409	864181	860034	918075	882071	1.01765e+06	870625	790615	814916	810452	782850	850561	909691	1	1.03074	1.02509	0.990179	1.07582	1.15061	0	0.204081	0.166593	-0.0652109	0.503428
Q9UPR3	SMG5	Nonsense-mediated mRNA decay factor SMG5	20170.8	17782.7	18386.8	17537.6	17601.5	16955.7	17363.9	17928.3	18833.3	17820.5	17141.5	15741.8	17553.9	14724.3	16505.6	16630.2	17263.9	18443.6	16170.2	16528.7	16850.3	18104.2	18020.3	17897.8	16287.3	15418	15101.9	16030.3	14273.3	15002.1	18295.9	17780.3	16333.4	17007.3	17432	15165.1	1	0.971821	0.892735	0.92957	0.952781	0.828881	1	0.835325	0.373156	0.588412	0.724059
P06748	NPM1	Nucleophosmin	526934	513942	512577	510786	511780	569582	547141	581258	538903	608337	518686	519100	503150	539574	614687	509954	507892	509146	517778	586430	548832	548254	516576	567794	562359	560944	557865	545125	597399	582310	515204	569044	539039	526240	548763	568729	1	1.1045	1.04626	1.02142	1.06514	1.10389	0	1.0059	0.445314	0.20618	0.626982
Q9Y618	NCOR2	Nuclear receptor corepressor 2	48595.9	47573.6	47105.9	46667.4	55520.7	60176.2	58339.8	65642.4	63081.8	61981.9	56375.7	56355.3	56622.8	58771.8	63512.2	59025.6	58760.2	53740.1	58889.3	52106.2	63952.8	61962.7	55526.1	65042.2	58872.8	57107.1	62895.8	57947.5	67332.5	55283.3	49092.7	61844.4	58327.6	56504.3	61071.3	60113.2	1	1.25975	1.18811	1.15097	1.244	1.22448	0	1.15709	0.837968	0.672522	1.08693
P07098	LIPF	Gastric triacylglycerol lipase	15313.3	18656.9	15586.3	16015.2	19441	15372.7	19046.5	18311.4	13691.4	12585.9	20262	13493.3	455.102	20816.4	365.268	17305.4	13480.3	18749.8	17529.2	19414.6	14918.3	18027.9	17721.9	15479.3	18398.7	9186.8	11011.3	9808.02	7542.57	15573.1	17002.6	15801.6	11078.4	17295.9	16909.2	10624.4	1	0.929365	0.651573	1.01725	0.994511	0.624868	1	0.811707	0.0711885	1.04599	0.985368
P51817	PRKX	cAMP-dependent protein kinase catalytic subunit PRKX	13728.4	15384.7	17401.8	14592	18472.5	19713.3	20209.2	25174.4	20801.1	22730.6	17594.6	16354.8	19855	20484.6	24787.4	18196.2	17083.4	16580.7	13508.2	19144.5	17480.7	18830.9	16818.1	21445.5	20788.4	19262.9	22724.5	20326.3	25280.3	19997.5	15915.9	21725.7	19815.3	16902.6	19072.7	21518.3	1	1.36503	1.245	1.06199	1.19834	1.352	0	1.03703	0.696022	0.176118	0.563478
Q9Y5B6	PAXBP1	PAX3- and PAX7-binding protein 1	114773	110710	106867	109871	111688	118054	110276	117160	123485	5187.37	111591	120210	116342	99173.1	121599	116906	122611	118622	104656	125359	114640	115244	116758	124040	119291	125201	118573	120381	124714	129218	110782	94832.4	113783	117631	117994	123618	1	0.85603	1.02709	1.06182	1.06511	1.11587	0	-1.24254	0.233822	0.533582	0.561923
P17612	PRKACA	cAMP-dependent protein kinase catalytic subunit alpha	15728.2	13895.1	15492.1	15231.3	16722.6	16156.6	15331.5	14802.4	15362.1	14434.5	16498.2	14513.6	15978.8	16069.4	12578.6	16441.4	16141.2	16947.4	16167.7	14838.6	15659.2	17462.7	16483.1	14343	14786.2	12246.1	11964.9	12723.2	12621.4	13461.3	15413.9	15217.4	15127.7	16107.3	15746.8	12603.4	1	0.987254	0.981436	1.04498	1.0216	0.817667	1	0.930097	0.898184	1.24672	1.11848
Q10713	PMPCA	Mitochondrial-processing peptidase subunit alpha	84127.4	85736.4	85269.4	94432.1	97209.3	94304	103130	97635.3	106167	100975	94910	90093.4	94672.6	101018	99681.8	88993.7	85269.6	110137	97736.5	106841	87680	100604	97288.4	95078.2	102729	103798	99670.9	102408	102412	109253	89354.9	100442	96075.2	97795.5	96675.9	103508	1	1.12408	1.07521	1.09446	1.08193	1.1584	0	0.783377	0.474812	0.596361	0.517257
Q86TP1	PRUNE1	Exopolyphosphatase PRUNE1	16981.7	18806.4	15902	14743.8	17586.2	15755.2	17302.7	16274.5	16850.4	11004.8	16582.3	15152.3	12768.3	19459.4	17047.3	15258.8	18164.7	20202.6	17300.9	14692.9	19501.6	18528.4	17751.7	16769.4	18283.2	12150.8	13562	13291	13205.3	14324.7	16804	15437.5	16201.9	17124	18166.9	13306.8	1	0.918681	0.964168	1.01904	1.0811	0.791879	1	0.609269	0.827833	1.09149	1.38968
Q14781	CBX2	Chromobox protein homolog 2	9366.71	9058.33	8395.9	5212.49	8775.25	12996	14313.7	10239.5	8463.43	11449.9	11828	10213.6	12792.8	9754.68	14442.8	8508.43	7031.18	8861.86	10621.4	10820.8	10471.6	11072.6	9077.52	9687.16	8531.91	11563.2	13495	12759.1	11562.1	12570.1	8161.74	11492.5	11806.4	9168.72	9768.15	12389.9	1	1.4081	1.44655	1.12338	1.19682	1.51805	0	0.787757	0.861991	0.238162	0.379931
Q13045	FLII	Protein flightless-1 homolog	48289.1	78664.8	49517.2	65357.6	148826	158131	141263	162100	127585	156682	146789	152247	149400	149946	153627	150024	141409	157036	125435	105994	155560	155370	103181	157002	144186	157624	131297	153147	156612	151557	78130.9	149152	150402	135979	143060	150047	1	1.909	1.925	1.74041	1.83103	1.92046	0	0.987553	1.00493	0.804387	0.902838
Q9Y2S2	CRYL1	Lambda-crystallin homolog	33521.6	33490.6	34507.9	34745.1	33043.6	30240.7	29950.7	28155.1	31016.2	28577.8	31782.5	31159	31045.7	31228.1	27334	34762.7	32073.6	30372.3	33924.8	32858.6	31977.9	33210.3	31891.9	31136.8	32906.8	28087.5	28701	29691.7	30463.9	31011.4	33861.8	29588.1	30509.8	32798.4	32224.8	29591.1	1	0.87379	0.901011	0.968596	0.951656	0.873879	1	-0.000705484	0.215126	0.751002	0.616682
Q6UXP7	FAM151B	Protein FAM151B	8784.44	8461.51	9293.44	8652.09	7945.31	8447.7	8327.75	7938.75	7418.83	8091.08	8619.66	7794.67	8979.13	9256	8831.79	8367.54	9270.08	8571.32	8286.32	7505.07	8681.62	9135.18	9277.4	7570.59	9628.06	6238.5	5817.76	6681.92	7605.2	6857.17	8627.36	8044.82	8696.25	8400.06	8858.57	6640.11	1	0.932478	1.00799	0.973654	1.0268	0.769657	1	0.706863	1.03467	0.885624	1.11635
Q16254	E2F4	Transcription factor E2F4	12982	12549.9	11808	12032.2	10831.7	15720.7	14417.8	12687	12596.2	14367.5	13295	13733.5	11344.6	13819.6	14199.8	13275	11673.1	13597.2	12343.5	14117.7	16646.2	14467.4	14167.9	13899.8	11550.3	14341	16107.3	15664.1	14624.7	13750.3	12040.8	13957.8	13278.5	13001.3	14146.3	14897.5	1	1.15922	1.1028	1.07977	1.17487	1.23725	0	0.671079	0.43327	0.33624	0.737053
P10721	KIT	Mast/stem cell growth factor receptor Kit	14033.6	13719.8	13018.2	12277.6	10731.5	17005.1	15385.9	15687.5	15281.4	14700.2	12824.8	12379.2	13444.1	14284.6	12986.4	13485.2	12697.1	13820	12312.6	12347.1	13685.5	12799.2	12202.3	12844.7	14654.9	10174.5	9868.02	10546.3	8962.25	9833.04	12756.1	15612	13183.8	12932.4	13237.3	9876.83	1	1.22389	1.03353	1.01382	1.03772	0.774281	1	1.99188	1.14854	1.06122	1.16713
Q96JC9	EAF1	ELL-associated factor 1	2968.94	3431.26	3396.23	2937.2	3273.32	3202.43	3027.51	2994.94	3752.19	3030.65	2552.76	3126.86	3471.4	2330.4	3592.02	2735.03	3461.85	3929.54	5939.09	3377.69	3579.18	4366.62	3646.67	2967.19	2535.78	4498.47	4316.55	3897.13	4958.44	4234.82	3201.39	3201.54	3014.69	3888.64	3419.09	4381.08	1	1.00005	0.941682	1.21467	1.068	1.36849	0	0.00013216	-0.158261	0.582566	0.184539
Q9UBQ5	EIF3K	Eukaryotic translation initiation factor 3 subunit K	146502	136082	131451	132878	130596	122971	118498	124091	120541	119529	131066	132796	133852	134761	110025	141846	145941	142054	141293	136615	138704	142601	135089	122353	119560	118888	114470	120509	123780	122867	135502	121126	128500	141550	131662	120103	1	0.893904	0.948326	1.04463	0.971658	0.886355	1	0.0664254	0.545309	1.39273	0.750614
Q8ND76	CCNY	Cyclin-Y	5407.06	4775.07	4718.97	5576.48	4604.44	3934.13	4713.65	2677.31	4188.23	3091.77	4675.67	3944.18	4902.16	3768.38	3995.99	4786.51	4873.59	2792.04	4130.73	4198.25	3502.72	4050.32	3433.13	3305.42	3825.22	3284.22	4052.33	3459.02	3278.59	4079.91	5016.4	3721.02	4257.28	4156.22	3623.36	3630.82	1	0.74177	0.848671	0.828527	0.722303	0.723789	1	0.0650994	0.452127	0.379196	-0.00537921
P53004	BLVRA	Biliverdin reductase A	539962	503250	528020	498422	488429	514514	466254	539553	506584	479892	517181	518174	510700	488076	458590	510637	571663	534431	526459	523779	509941	524005	510769	500685	476320	483449	445709	455191	460455	434642	511617	501360	498544	533394	504344	455889	1	0.979951	0.974448	1.04257	0.985785	0.891075	1	0.815941	0.765421	1.39077	0.869499
Q6P3S6	FBXO42	F-box only protein 42	4662.88	5176.64	5214.67	4766.67	5486.72	4536.53	4408.35	5759.84	4878.21	5460.02	5591.08	3869.14	5198.77	5480.17	3356.01	5859.71	6149.48	4528.58	3585.46	4730.73	6104.29	2929.9	5675.78	5647.44	2616.2	7232.88	7050.69	5669.16	8084.77	6609.83	5061.52	5008.59	4699.03	4970.79	4594.72	6929.46	1	0.989544	0.928385	0.982076	0.907776	1.36905	0	-0.028333	-0.194054	-0.0485681	-0.249897
O14787	TNPO2	Transportin-2	71844.1	68163.7	69264	59777.9	61316.8	63781.2	60782.6	63804.7	67218.9	63729.3	63431.2	59917.4	63206.9	60357.4	57563.4	63635.8	64791.3	65590.1	67612.3	66117.4	71093.4	64262.9	62921.3	58413.6	56212.7	58694	55434.2	56822.4	52064.3	55374.1	66073.3	63863.3	60895.3	65549.4	62580.8	55677.8	1	0.966552	0.921632	0.992071	0.947142	0.842667	1	0.787409	0.501897	0.949603	0.664036
Q9H6Y2	WDR55	WD repeat-containing protein 55	14065.4	16310.8	14818.8	16669.3	15288.3	18469.3	16146.5	20059.3	16905.9	20838.9	17687.2	16021.4	17922.3	17121	18013.9	15890.4	16691.3	18359.1	15003.9	19862.2	17022	17935.7	17811.7	18337	17831.3	18110.7	18538.8	18176.5	18369.5	18566.8	15430.5	18484	17353.2	17161.4	17787.5	18352.4	1	1.19789	1.1246	1.11217	1.15275	1.18936	0	1.04502	0.658006	0.592376	0.806661
P17706	PTPN2	Tyrosine-protein phosphatase non-receptor type 2	7573.13	11239.3	9606.37	3969.89	7713.93	6861.21	8736.23	11469.1	8201.99	7887.89	13071.5	17074.9	48214.3	13583.9	7876.35	6472.21	4989.13	12552.4	6595.38	14722.3	9629.64	12147.2	13410.9	5551.66	16704.2	18312.8	13634.7	12673.2	14738.3	15012.3	8020.53	8631.28	19964.2	9066.28	11488.7	14874.2	1	1.07615	2.48914	1.13038	1.43241	1.85452	0	0.0891133	1.74265	0.152582	0.50603
P50616	TOB1	Protein Tob1	11562.2	9560.47	9706.02	9232.22	10751.9	12342.3	11040.9	11809.2	12119.1	12553.8	11372.2	11641.4	11414.3	12702.8	11860.9	12227.6	10190.1	10625.9	9699.38	11675.9	11329	7990.79	11179.1	12688.4	11115.5	12297.4	12793.8	12105	13972	12628.4	10162.6	11973.1	11798.3	10883.8	10860.5	12759.3	1	1.17816	1.16096	1.07097	1.06868	1.25552	0	0.697219	0.62992	0.277735	0.268794
P22830	FECH	Ferrochelatase, mitochondrial	52263.3	50577.9	48115	56982.4	59317.4	61100	60990.1	59099.4	60496.5	59275	57187	56224.8	57120.4	61471.4	59692	53455.6	55009.1	65073	58763.1	64160.1	55266.2	59126.1	55185.3	59316.7	63311.8	64992.4	59464.5	65180.2	61629.1	68325.5	53451.2	60192.2	58339.1	59292.2	58441.2	63918.4	1	1.12612	1.09145	1.10928	1.09336	1.19583	0	0.644014	0.466977	0.558029	0.47673
Q9Y2T2	AP3M1	AP-3 complex subunit mu-1	40034.6	34923.9	38114.8	39840.6	35619.9	71932	70688.9	39025.5	80045.9	42708.8	46132.6	37458.1	44589.3	42659.1	30451.6	33253.9	54814.4	31656	54854.9	41645.1	41670.9	33526.9	76603.6	68677.4	49229.2	44001.4	43177.9	44111.5	51335.8	43038.7	37706.8	60880.2	40258.1	43244.9	53941.6	45133.1	1	1.61457	1.06766	1.14687	1.43056	1.19695	0	3.12045	0.343558	0.745742	2.18612
Q969G3	SMARCE1	SWI/SNF-related matrix-associated actin-dependent regulator of chromatin subfamily E member 1	52188.3	53625.1	52145.9	51125.8	52841.6	61572.2	62247.9	65638	63966.1	66923.8	53411.2	60330	58002.2	59253.7	59435.7	54704.4	58366.8	57904.1	58466.1	62909.5	58462.6	58942.2	55033	58783.6	62851.2	59805.4	57577	55998.2	60753.9	58068.5	52385.3	64069.6	58086.6	58470.2	58814.5	58440.6	1	1.22304	1.10883	1.11616	1.12273	1.11559	0	1.9296	0.941533	1.00489	1.06175
Q8NEC7	GSTCD	Glutathione S-transferase C-terminal domain-containing protein	3979.76	2825.93	2405.99	3658.46	4762.17	3816.04	5779.48	6702.1	6187.75	5827.04	4499.75	3026.44	5035.74	6570.39	5521.39	4778.5	4657.75	5991.53	6191.56	7250.78	7121.54	7853.72	6434.82	5938.73	6951.69	5827.39	6110.08	5429.41	4757.46	5984.77	3526.46	5662.48	4930.74	5774.02	6860.1	5621.82	1	1.60571	1.39821	1.63734	1.94532	1.59418	0	1.0194	0.670186	1.07264	1.59096
Q9UHG3	PCYOX1	Prenylcysteine oxidase 1	15964	22157.8	10524.3	12180.3	21385.5	6223	7729.68	9051.25	7251.44	7595.92	7532.58	11537.8	14322.8	8644.28	10845.6	30599.4	12568.4	13626.1	36253.7	9168.66	4906.08	22027.9	8030.97	22293.7	10369.8	8830.16	12371.4	7019.28	6287.23	7999.26	16442.4	7570.26	10576.6	20443.2	13525.7	8501.46	1	0.460412	0.643253	1.24333	0.822611	0.517046	1	-0.117266	0.261323	1.50383	0.632701
Q4G148	GXYLT1	Glucoside xylosyltransferase 1	1849.2	1830.37	1890.22	1765.88	1709.56	2072.78	1938.48	2155.31	1503.84	1972	1583.77	1818.52	1854.83	1758.74	2208.84	2276.79	1993.15	1455.08	1664.86	1947.43	1973.86	2115.66	1963.4	1668.5	1596.25	1004.98	1046.17	1132.67	1299.48	1416.84	1809.04	1928.48	1844.94	1867.46	1863.53	1180.03	1	1.06602	1.01984	1.03229	1.03012	0.652295	1	1.18988	1.05707	1.09287	1.08663
O15085	ARHGEF11	Rho guanine nucleotide exchange factor 11	2728.23	2558.66	2249.83	2729.48	2149.22	1824.92	2018.17	1976.51	1336.15	1626.48	2578.13	1995.8	2046.59	1728.13	1963.12	2490.73	1662.69	1612.39	2188.91	1850.64	1603.62	1800.49	2128.92	2017.1	2086.72	1711.11	1652.37	1796.76	1755.21	1247.9	2483.08	1756.44	2062.36	1961.07	1927.37	1632.67	1	0.707364	0.830562	0.789773	0.776199	0.657517	1	0.145546	0.505267	0.386168	0.346535
P41208	CETN2	Centrin-2	14877.8	14059.2	14851.7	14201.9	14334.6	17104.8	16984	16564.6	14973.7	17818.4	14536.7	14096.3	14834.3	15735.5	18222.5	13541.4	14879.8	14483.2	12381.9	17623.5	16024.6	15288.9	15073.7	14367.6	17117.8	16441.4	17323.8	16454.1	16950.1	16487.4	14465.1	16689.1	15485.1	14582	15574.5	16731.3	1	1.15375	1.07052	1.00808	1.0767	1.15667	0	0.981362	0.450083	0.0515829	0.489556
Q9NYU2	UGGT1	UDP-glucose:glycoprotein glucosyltransferase 1	252730	232851	249818	244098	231573	232557	224232	239179	244200	214173	236726	231644	227060	213406	222323	224719	242538	227227	232701	231707	241239	234742	239553	258961	227370	223540	221953	208641	223998	209804	242214	230868	226232	231778	240373	217587	1	0.953157	0.934017	0.956915	0.992398	0.898327	1	0.539279	0.351025	0.576244	0.925231
Q9NWZ3	IRAK4	Interleukin-1 receptor-associated kinase 4	29239.5	52033.1	34538.9	27585.3	46069.3	58001	47716.6	56326.5	45001.6	50280.1	51695.1	55140.9	49271.2	46726.7	52510.7	53741.1	52043.6	44979.7	40574.5	32645	43583.4	38321.5	50173.8	37574.5	48308.3	54238.4	56389.9	55414.5	64098.9	54184.3	37893.2	51465.1	51068.9	44796.8	43592.3	56865.2	1	1.35816	1.34771	1.18218	1.1504	1.50067	0	0.715367	0.694483	0.363881	0.300394
Q8NFC6	BOD1L1	Biorientation of chromosomes in cell division protein 1-like 1	48775.8	48897.9	33169.3	38640.1	55484.6	56771.4	33217.3	57845.8	32751.3	41212.7	56390.2	59764.1	59179.9	50308.1	58589.4	55520.7	62164.2	63191.7	32618	34239.6	32724	28484.7	45193.6	49574.1	37311.9	59747.7	59423.5	60546.9	69149.8	60332.2	44993.5	44359.7	56846.3	49546.8	38657.7	61840	1	0.985913	1.26343	1.1012	0.859183	1.37442	0	-0.0376247	0.703577	0.270282	-0.376094
Q9NY27	PPP4R2	Serine/threonine-protein phosphatase 4 regulatory subunit 2	132322	136819	125268	127686	129082	141552	137227	158801	143650	157498	124654	138553	129981	133045	161081	128454	127651	113652	130484	135415	139294	138161	126673	146427	129651	142822	151995	141620	161037	140938	130235	147745	137463	127131	136041	147683	1	1.13445	1.05549	0.976164	1.04458	1.13397	0	1.0036	0.414243	-0.177922	0.332783
Q6P1L8	MRPL14	Large ribosomal subunit protein uL14m	13588.5	15997.4	14555.2	14689.6	15478.5	18301.1	19055.9	17230.7	17253.6	18898.3	18086.6	19798.2	14509.3	16136.8	10646.1	14034.5	17232.3	20431.1	16726	16764.1	14627.9	14280.7	16005.2	16324.7	18834.4	17821.5	16711.9	17497.2	19173.9	17481.2	14861.8	18147.9	15835.4	17037.6	16014.6	17737.2	1	1.22111	1.06551	1.1464	1.07756	1.19347	0	1.14286	0.338587	0.756697	0.400916
O75122	CLASP2	CLIP-associating protein 2	11200.4	9401.95	9974.05	7115.33	22125.4	19164.5	22312.5	16058.8	15949.9	21419.4	23028.9	20686.6	18782.4	8362.63	21244.1	23582.8	18718.6	18329.5	11321	9210.29	12142	9124.56	19476.3	14289.1	8002.9	19721.2	24793.9	20638.2	19927.6	20967.4	11963.4	18981	18420.9	16232.4	12607	21209.7	1	1.58659	1.53977	1.35684	1.05379	1.77288	0	0.758967	0.698392	0.461703	0.0696016
P25311	AZGP1	Zinc-alpha-2-glycoprotein	2965.49	4235.57	3592.28	2909.7	3180.75	3264.01	11299.1	6672.37	5887.7	8146.83	4688.25	4014.07	15796.1	31551	4660.75	2119.22	3227.07	5384.16	7346.33	4992.05	4823.91	3145.9	5749.14	3814.62	2368.54	6128.99	5473.67	7190.78	5290.38	3681.43	3376.76	7054.01	12142	4613.77	3980.42	5553.05	1	2.08899	3.59577	1.36633	1.17877	1.64449	0	1.68969	4.02763	0.568402	0.277381
Q14331	FRG1	Protein FRG1	10235.8	11857.8	15724.9	9472.54	10141.7	7762.02	9231.72	6884.01	9099.66	5687.93	10971	8265.96	6768.82	8164.16	9482.1	6868.38	9009.09	11178.9	10868.1	8382.18	5444.28	7943.66	7994.28	7794.16	6901.01	7439.97	8502.82	8738.5	7651.73	7347.89	11486.5	7733.07	8730.4	9261.34	7215.48	7936.18	1	0.673229	0.760056	0.806278	0.628169	0.690912	1	-0.0572095	0.223702	0.373247	-0.202994
Q92600	CNOT9	CCR4-NOT transcription complex subunit 9	33229.9	33091.4	35279.9	26529	32641.4	31940.7	33212.2	35315.7	33207.6	33584.9	33004.7	29602.1	33175.1	33622.6	32336.7	29308.6	30585.7	33615.8	32868	35139.1	32822.1	32439.1	33836.3	30455.3	32042.3	29395.9	24479.5	25462.1	23650.2	25181.2	32154.3	33452.2	32348.2	32303.4	32319	25633.8	1	1.04037	1.00603	1.00464	1.00512	0.797211	1	1.19905	1.02974	1.02287	1.02526
P09455	RBP1	Retinol-binding protein 1	28105.8	30570.6	35373.2	30772.2	28023.8	26414.1	30525.7	35221.9	32106.4	27371	31049.5	32887	33867.6	28301.9	29393.1	32479.4	35239.7	26455.1	33492.7	27676.9	28313.7	30518.1	30838.9	30182.1	30728.4	35689	40612.2	38785.4	37757.5	33606.3	30569.1	30327.8	31099.8	31068.8	30116.2	37290.1	1	0.992106	1.01736	1.01634	0.985185	1.21986	0	-0.0359029	0.0789599	0.074338	-0.0673843
Q9Y2A7	NCKAP1	Nck-associated protein 1	98440.1	94107.9	94651.3	89750.7	90150.3	96469.7	95256.6	100064	107293	90324.7	98604.3	87313.6	98686.2	88146.1	89366.7	90697.1	89700.7	87286.3	87921	86290.4	89310.8	88622.7	90008.7	92178.2	82682.5	83872.5	86149.6	86740	80953.9	77376.7	93420.1	97881.6	92423.4	88379.1	88560.6	83018.5	1	1.04776	0.989331	0.94604	0.947982	0.888658	1	1.42893	0.904179	0.515364	0.532811
P43490	NAMPT	Nicotinamide phosphoribosyltransferase	657201	635852	676239	604624	631260	624261	589593	683971	635669	645011	607167	662720	655725	603894	661085	660284	691429	606616	619608	668686	682380	688397	624938	734846	650772	708710	713846	695288	814135	713542	641035	635701	638118	649325	676266	729104	1	0.991679	0.995449	1.01293	1.05496	1.13739	0	-0.0605689	-0.0331236	0.0941274	0.400042
O60234	GMFG	Glia maturation factor gamma	151922	142716	157172	143867	131094	166282	141696	164023	156971	155082	143900	151972	148933	139210	172024	143106	129772	130553	141093	150917	152970	146511	143466	163194	150783	161972	167873	163158	203240	176544	145354	156811	151208	139088	151385	174557	1	1.07882	1.04027	0.956891	1.04149	1.20091	0	0.392298	0.200441	-0.21457	0.206503
Q9NR33	POLE4	DNA polymerase epsilon subunit 4	63718.2	64965.4	72688.8	73656.9	65709.9	91993.9	92456.7	105057	89979.3	98273.4	72896.2	78569.3	79077.7	85146.1	100723	68470.2	65584.3	67293.6	70281.4	79598.3	71515.5	76057.6	64265.7	96133.6	96618.1	76906.7	91721.4	76099.1	89463.5	76180	68147.8	95552.1	83282.4	70245.5	80918.1	82074.1	1	1.40213	1.22208	1.03078	1.18739	1.20435	0	1.96781	1.08676	0.150629	0.91699
Q96E29	MTERF3	Transcription termination factor 3, mitochondrial	640.957	1472.72	595.658	1300.02	2191.28	2011.73	3329.48	424.793	2626.32	2012	2944.75	2514.71	3329.34	4065.55	1616.76	1517.89	2705.85	3055.48	884.692	535.01	1272.56	2262.52	1121.63	2958.18	3264.49	2376.65	2668.08	2743.66	2315.13	3434.67	1240.13	2080.86	2894.22	1739.78	2175.88	2707.64	1	1.67794	2.33381	1.40291	1.75456	2.18336	0	0.572899	1.12714	0.340478	0.637642
Q5SYE7	NHSL1	NHS-like protein 1	7417.66	7438.8	4430.89	6140.37	5074.85	7748.63	8695.24	5648.49	4825.12	5983.24	8752.01	8654.68	3931.61	3987.84	5070.34	10499.8	8518.09	7533.45	3574.49	9382.55	5084.21	3273.88	4299.41	5376.16	5973.55	9433.58	7807.59	8493.56	8806.72	9737.22	6100.51	6580.14	6079.3	7901.67	4801.44	8855.73	1	1.07862	0.996522	1.29525	0.787055	1.45164	0	0.17408	-0.00770092	0.653726	-0.471495
P20073	ANXA7	Annexin A7	341701	345404	353612	354856	328951	362878	377112	391205	399762	323067	340217	352854	369510	347742	321370	352312	352402	348027	375747	323527	341582	351044	341043	372642	331936	317273	319408	319842	318689	295282	344905	370805	346339	350403	347649	314099	1	1.07509	1.00416	1.01594	1.00796	0.910683	1	1.84075	1.04655	1.17848	1.0891
Q9NXW9	ALKBH4	Alpha-ketoglutarate-dependent dioxygenase alkB homolog 4	2427.16	3157.3	2603.43	1790.4	4561.89	4027.63	3681.52	4468.27	4855.22	6045.18	4018.97	4649.19	4033.32	5181.9	2942.9	4881.59	4939.61	6438.73	5167.58	6944.42	5633.67	4813.42	5555.47	6282.52	6663.99	4955.36	4166.49	5544.06	5243.03	4566.94	2908.04	4615.56	4165.25	5674.39	5789.81	4895.18	1	1.58718	1.43233	1.95128	1.99097	1.68333	0	0.859289	0.632677	1.39213	1.45021
Q86Y82	STX12	Syntaxin-12	30543.2	34174.3	33333.8	32155.1	31391.9	37776.5	35433	41692.1	38141.9	40662.3	31057.1	34277.4	32523.6	34438.7	39134.9	30764.3	31814.9	30995.8	32069.7	36537.5	37458.6	36305.1	31548.9	39661.9	39101.1	38018.7	35856.8	35344.9	39007.4	36156	32319.7	38741.2	34286.3	32436.4	36815.1	36876.8	1	1.19869	1.06085	1.00361	1.13909	1.141	0	1.40912	0.43156	0.0256217	0.986472
Q12860	CNTN1	Contactin-1	1298.61	2138.8	1362.24	1649.03	1336.86	1119.7	1643.29	2939.37	1224.23	3288.07	2908.39	1441.1	2142.56	2423.8	2729.4	3561.64	1999.55	3119.04	1164.95	3271.4	2468.37	3036.11	2289.05	2927.43	3425.22	2654.81	2239.33	2098.32	2409.09	2741.36	1557.11	2042.93	2329.05	2623.31	2829.24	2428.58	1	1.312	1.49575	1.68474	1.81698	1.55968	0	0.557473	0.885787	1.22345	1.45974
P62495	ETF1	Eukaryotic peptide chain release factor subunit 1	281706	260578	257017	256776	242359	270606	260376	275520	282044	242721	256039	264121	256540	261161	230628	258608	274818	269001	265378	261007	257517	256157	254435	270570	228621	241318	228314	220950	231250	237315	259687	266253	253698	265762	253460	231830	1	1.02528	0.976937	1.02339	0.97602	0.892726	1	1.2357	0.785009	1.21808	0.776459
P19338	NCL	Nucleolin	1.04319e+06	983203	973996	952771	942520	924837	884306	998086	914026	1.02697e+06	998342	1.00393e+06	993227	976830	1.003e+06	1.03176e+06	1050241	990014	1.01686e+06	1.03516e+06	998724	1019036	993817	1.02926e+06	914651	1057293	1.06602e+06	1.04381e+06	1.16899e+06	1.12279e+06	979136	949645	995065	1.02481e+06	991098	1.09178e+06	1	0.969881	1.01627	1.04664	1.01222	1.11504	0	-0.261807	0.14141	0.405443	0.106197
Q12849	GRSF1	G-rich sequence factor 1	159683	157322	158685	155636	155903	179233	162877	181684	169088	178349	163286	162858	162569	160678	180795	160240	159914	162502	154314	167601	164619	169422	165136	174706	166388	167374	172648	168842	192091	174671	157446	174246	166037	160914	168054	175125	1	1.1067	1.05456	1.02203	1.06738	1.11229	0	0.950274	0.485936	0.196172	0.60003
Q6DT37	CDC42BPG	Serine/threonine-protein kinase MRCK gamma	16343.3	23277.3	19941.6	14547.7	22667.2	23846.8	22560.8	25424.7	22533.6	32494.8	36214.2	27766.9	24520.6	63877.7	21874.6	23572.6	35947.7	28308.5	17456.9	18637	23107.4	22958.9	49017.9	21805.8	61035.9	25073.4	23889.2	25738.4	32942.2	29326.1	19355.5	25372.1	34850.8	24784.5	35585.2	27393.9	1	1.31085	1.80057	1.28049	1.83851	1.4153	0	0.748493	1.92767	0.675394	2.01902
A1A5D9	BICDL2	BICD family-like cargo adapter 2	3153.08	2501.61	3912.43	2403.94	3661.62	7223.05	5932.73	5865.3	4829.08	6593.01	5477.56	7061.5	8453.34	5166.69	6119.62	3074.11	7967.17	4777.19	4404.72	4640.49	9477.81	7596.05	6142.99	7882.76	5211.11	5890.2	5861.63	8346.19	5679.96	3279.76	3126.54	6088.64	6455.74	4972.74	7262.14	5811.55	1	1.9474	2.06482	1.59049	2.32274	1.85878	0	1.1032	1.23992	0.687594	1.54026
A5YKK6	CNOT1	CCR4-NOT transcription complex subunit 1	89300	86506	88343.2	82140.6	82236.9	85688.1	89339	86625.4	93064.1	82473.4	87925.8	78894.7	91219	87291.9	84314.8	87463.9	87742.1	97014.3	86440.2	89970.5	90733.2	86487.4	85140.4	81030.6	81051.1	80386.1	77020.9	76061.1	78189.9	74798.6	85705.4	87438	85929.2	89726.2	84888.5	77291.3	1	1.02022	1.00261	1.04691	0.990469	0.901826	1	1.20592	1.02661	1.47787	0.902919
Q6ZRV2	FAM83H	Protein FAM83H	204140	218685	191508	214654	202402	224609	214834	223964	243359	239274	218402	225526	219069	183343	259121	212117	221702	195451	221955	221067	240084	217827	222787	248346	249114	222486	240877	217851	241216	246850	206278	229208	221093	214458	235632	233856	1	1.11116	1.07182	1.03966	1.1423	1.1337	0	0.831455	0.537192	0.296628	1.06438
P61626	LYZ	Lysozyme C	932.666	667.426	498.822	521.631	517.334	1391.11	1289.09	1501.09	715.958	14364.9	1303.68	482.573	5002.66	109966	2256.36	744.159	621.371	5860.92	590.542	699.965	3895.49	707.34	1142.14	500.329	617.636	731.049	1152.53	3300.49	1979.62	3676.7	627.576	3852.44	23802.3	1703.39	1372.59	2168.08	1	6.1386	37.9274	2.71424	2.18712	3.45468	0	2.09339	15.0437	0.698354	0.483616
Q86X29	LSR	Lipolysis-stimulated lipoprotein receptor	58197.5	55480.6	61086.4	52823.3	56369.5	63762.5	62119.8	68944.3	57024.7	67650.6	55591.8	59924.4	60380.9	59387.8	65025.4	59087.8	54526.4	54628.2	56697.2	64226.6	65813.4	63228.1	57388.7	68003.6	67908.8	61590.4	65225.6	64721.8	73248.1	63487.2	56791.5	63900.4	60062	57833.2	64468.5	65654.6	1	1.12518	1.05759	1.01834	1.13518	1.15606	0	0.802076	0.369008	0.117539	0.86618
P12694	BCKDHA	2-oxoisovalerate dehydrogenase subunit alpha, mitochondrial	37466.4	32787.5	38138.4	39302.6	37840.2	31240.4	33034.8	29341.2	32859.3	33546.2	35708.6	29659.2	29139.7	37289.8	31672.5	33383	34642.8	38225.4	41077.1	42133.7	35560.2	40267	34041.1	34447.1	37843.1	34692.5	30122.3	31351	27433.7	31424.2	37107	32004.4	32694	37892.4	36431.7	31004.8	1	0.862488	0.881072	1.02117	0.981801	0.835549	1	0.163813	0.276814	1.1287	0.889332
Q6XQN6	NAPRT	Nicotinate phosphoribosyltransferase	313527	302035	314352	301192	299905	327102	305563	357576	318218	345215	297795	323038	313859	292546	343837	310520	299283	281100	304163	317651	328308	318876	310031	337248	328420	323040	337160	335621	385161	342950	306202	330735	314215	302543	324576	344786	1	1.08012	1.02617	0.988051	1.06001	1.12601	0	0.635822	0.207672	-0.0948232	0.476213
O60763	USO1	General vesicular transport factor p115	703202	685612	707796	644980	657502	714790	665429	742720	688314	676189	656298	658519	663028	660126	707355	655945	645190	616141	644776	687764	732960	692404	631908	745460	613643	612400	627022	617313	636473	564494	679818	697488	669065	649963	683275	611540	1	1.02599	0.984182	0.956084	1.00508	0.899564	1	1.2588	0.842507	0.562744	1.05062
P84098	RPL19	Large ribosomal subunit protein eL19	293477	292757	300904	286600	319209	336630	313157	332963	327000	346635	313657	306532	311919	323258	347819	305663	328159	346006	329826	363510	318029	325156	300864	344534	338333	330629	313176	325765	334187	349853	298590	331277	320637	334633	325383	330722	1	1.10947	1.07384	1.12071	1.08973	1.10761	0	1.01727	0.686138	1.12171	0.833851
P24385	CCND1	G1/S-specific cyclin-D1	17224.2	16577.7	16093.2	14890.1	15797.9	11476.8	10692.2	8873.89	10477.8	9795.42	11203	12422.6	11859.4	12639.7	12244.8	18439.6	14307.3	14057.8	13712.4	13894.8	16219.5	17584.4	13973.6	14607.2	14516.5	13764.2	12060.9	11313.8	15032.7	13270.2	16116.6	10263.2	12073.9	14882.4	15380.2	13088.4	1	0.63681	0.749157	0.923418	0.954309	0.812104	1	-0.932933	-0.335012	0.592421	0.756828
P46013	MKI67	Proliferation marker protein Ki-67	11257.8	12469.1	12245.8	9709.74	11311.3	13941.2	12848.6	16512.7	13980.9	14020.2	10902.9	14024.5	12235	8945.93	14523.9	12564.5	11948.9	9631.22	11637.9	14375.5	13436.5	14466.7	13201.2	14606	11777.2	12961.5	14177.2	16827.7	15445.5	13179.4	11398.7	14260.7	12126.4	12031.6	13497.5	14518.3	1	1.25108	1.06384	1.05552	1.18412	1.27367	0	0.917434	0.233271	0.202873	0.672788
Q6P1M3	LLGL2	LLGL scribble cell polarity complex component 2	49260.5	51305.2	48134.6	55187	62077.1	62033.4	62308.1	51772	62681.1	63625.3	59494.2	57813.6	56835.4	65938.1	57097.6	56679.7	59886.8	74092	56709.7	69256.3	50591.7	61782	58996.3	53450.4	67092.4	70229.5	59668.9	66206.9	59031.9	76705.3	53192.9	60484	59435.8	63324.9	58382.6	66368.5	1	1.13707	1.11736	1.19048	1.09756	1.2477	0	0.553379	0.473822	0.768999	0.393887
P38646	HSPA9	Stress-70 protein, mitochondrial	1.64787e+06	1.555e+06	1.53114e+06	1.48851e+06	1.40489e+06	1.47138e+06	1.42875e+06	1.56057e+06	1.49068e+06	1.38853e+06	1.44268e+06	1.47804e+06	1.45851e+06	1.36729e+06	1.4419e+06	1.56712e+06	1567135	1.4438e+06	1.46493e+06	1.42694e+06	1.51928e+06	1.46935e+06	1.43502e+06	1.55329e+06	1.38566e+06	1.35314e+06	1343928	1.29775e+06	1453427	1.33485e+06	1.52548e+06	1.46798e+06	1.43768e+06	1.49399e+06	1.47252e+06	1.35662e+06	1	0.962306	0.942444	0.979353	0.965282	0.889305	1	0.659476	0.480049	0.813476	0.68636
P62330	ARF6	ADP-ribosylation factor 6	18524.4	17081.3	16915.4	17147.4	19596.8	17982.8	17733.5	15699.1	18734.3	15129.7	16581.6	14764	18887	16001.2	14210	14182.9	16611.3	20798.4	17738.9	19603.8	13494.7	16326	14295	12757.6	15434.6	15043.5	13885.6	16578	10814.4	12100.1	17853.1	17055.9	16088.8	17787	14461.6	13684.3	1	0.955348	0.901177	0.996303	0.810033	0.766497	1	0.808771	0.57678	0.984166	0.186449
O95140	MFN2	Mitofusin-2	11449.1	14927.7	13322.3	11714.7	14366.3	16798.1	17784.6	18458.8	16270.2	16027.2	17809.6	14950.3	14549.7	16524.2	15811.1	15090.3	15737.5	15526.5	16650.8	17012.2	17149.2	17558.6	15948.8	13359.8	14307.1	14162.4	16786.9	16616.9	18899.8	18354.5	13156	17067.8	15929	16003.5	15664.7	16964.1	1	1.29734	1.21077	1.21644	1.19069	1.28945	0	1.02723	0.728178	0.74774	0.658781
Q4L180	FILIP1L	Filamin A-interacting protein 1-like	98417.6	86889.5	101157	102452	91798.1	103777	93111.1	109256	102621	112377	98094	101412	97377.8	91673.4	115108	98442.5	92494	90410.3	90620.8	87706.8	100215	98991.5	96181.8	100432	96827.5	106249	109601	109941	130218	109701	96142.9	104228	100733	91934.9	98529.6	113142	1	1.0841	1.04774	0.956232	1.02482	1.17681	0	0.475635	0.270021	-0.247537	0.140399
O43422	THAP12	52 kDa repressor of the inhibitor of the protein kinase	20272.9	25199.5	6853.34	19359	28258.9	47001.4	42140.6	45003.9	41689.8	44991.1	34990.9	33927.6	36069.3	39217.3	35583	35725.1	36291.7	37093.3	15931.7	44998.3	40304.6	40729.2	39390.8	35338.3	43732.2	39387.4	39453.6	38858.7	40449.5	36480.4	19988.7	44165.4	35957.6	34008	39899	38925.9	1	2.20951	1.79889	1.70136	1.99608	1.94739	0	1.27668	0.843256	0.740306	1.05139
Q13796	SHROOM2	Protein Shroom2	49123.2	41840.2	50106.3	40118	42380.6	53433.6	57300.4	45764.9	51724.3	57951.1	42224.5	47006.4	45627.9	40858	58891.3	50849.3	46669.4	39754.7	43718.8	46894.7	54245.9	47113.1	44656.2	47807.2	48615.8	54104	59129.1	50839.6	64499.5	49573.9	44713.7	53234.9	46921.6	45577.4	48487.6	55629.2	1	1.19057	1.04938	1.01932	1.0844	1.24412	0	0.780646	0.202276	0.079127	0.345741
P57740	NUP107	Nuclear pore complex protein Nup107	30852.3	28561.2	26872.5	31837.2	26850.1	25245.9	21186.5	27398.9	26637.8	22793.2	28810.1	31143.9	25892.9	26034.5	22285.6	27301.6	30187.6	32025.1	37750.9	25435.5	25730.6	33274.6	25549.6	25651	85615.5	25307.7	20586.7	24214	26174.3	19500.1	28994.7	24652.5	26833.4	30540.2	39164.3	23156.6	1	0.850242	0.92546	1.0533	1.35074	0.798649	1	0.256234	0.629801	1.26473	2.74194
Q9H944	MED20	Mediator of RNA polymerase II transcription subunit 20	30638.2	28670.9	31325.8	30767	31344.8	30364.2	27766.2	31439.9	34675.2	31307.4	29732.2	29855.8	29477.7	29690	28684.7	29894.9	28211.1	34431.5	31868.2	28831.2	31752.9	29743.6	27222.6	30404.2	29536	25125	24094.8	25761.2	28417.4	28379.9	30549.3	31110.6	29488.1	30647.4	29731.9	26355.7	1	1.01837	0.965261	1.00321	0.973241	0.862724	1	1.13383	0.746942	1.02338	0.805068
Q8IXS8	HYCC2	Hyccin 2	15811.7	19572.3	15047.6	17382.4	17438.6	25804.7	21819.3	25523.1	23053.5	24025.5	18642.3	20720.2	20971.1	20516.9	21587.3	16217.5	17543.4	20343.8	16992.1	18016.5	18157.2	18263	19770.1	21040.8	22920.5	19462.9	21835.5	19693	24868	20610.2	17050.5	24045.2	20487.6	17822.7	20030.3	21293.9	1	1.41024	1.20158	1.04529	1.17476	1.24887	0	1.64837	0.809975	0.181967	0.70222
Q8N122	RPTOR	Regulatory-associated protein of mTOR	31515.6	24175.9	13163	37031.5	15865.8	12286.5	21847	8697.94	11895.2	6629.41	36272	25198.8	22018.1	23011	23013	30901.1	33244.7	30894	7525.67	10905.5	30413.9	20821.5	9681.42	8849.17	13554.5	4825.15	15874.5	13388.6	9775.61	7352.5	24350.4	12271.2	25902.6	22694.2	16664.1	10243.3	1	0.503944	1.06374	0.931986	0.684348	0.420662	1	0.143753	1.11003	0.8826	0.455149
Q9NX05	FAM120C	Constitutive coactivator of PPAR-gamma-like protein 2	6227	4446.76	4995.06	4649.93	6996.23	7617.9	7382.03	6200.02	5228.64	7987.28	6801.29	7683.07	6251.66	8126.67	8174.59	7581.57	7503.95	5996.36	5767.9	5118.9	6568.29	5841.78	6545.03	6684.78	7338.31	7304.59	7354.77	6880.72	7489.25	8578.13	5463	6883.17	7407.46	6393.74	6595.64	7521.49	1	1.25996	1.35593	1.17037	1.20733	1.37681	0	0.689911	0.944603	0.452147	0.550228
Q9UBK9	UXT	Protein UXT	16790.9	14919	13857.9	14629.2	14857	12806.7	11885.3	13866.6	12995	12618.4	12786.9	12830.8	14708.9	12858.5	12398.7	15855.7	14683	13197.6	14273.5	12358.9	15535.2	15249.7	15696.4	13982.6	13320.6	12974.7	12440.9	12335.5	13470.5	12066.6	15010.8	12834.4	13116.7	14073.7	14756.9	12657.7	1	0.85501	0.873819	0.937573	0.983087	0.843236	1	0.0751014	0.195086	0.601776	0.89211
P35268	RPL22	Large ribosomal subunit protein eL22	372186	346960	344958	352982	386718	345356	335802	348118	344305	374917	366432	375892	384617	395579	362078	373140	408023	395646	365831	404705	384606	380196	374408	387720	395618	398751	389773	387859	396878	420575	360761	349699	376919	389469	384510	398767	1	0.969339	1.04479	1.07958	1.06583	1.10535	0	-0.291042	0.425158	0.755359	0.624869
Q9BUT9	MCRIP2	MAPK regulated corepressor interacting protein 2	5473.98	5823.53	6643.41	5460.81	8175.46	3970.68	9394.83	7279.83	8098.06	6283.17	5118.27	7680.58	4287.94	5753.84	5259.87	3281.61	7125.69	5530.16	7900.55	5101.8	6727.15	6305.46	3824.36	2935	3661.18	4959	3846.1	4850.9	4220.09	4701.26	6315.44	7005.31	5620.1	5787.96	4690.63	4515.47	1	1.10924	0.889899	0.916478	0.742725	0.71499	1	1.38327	0.613695	0.706953	0.0973134
Q9HAW4	CLSPN	Claspin	811.794	1808.66	2306.56	1350.43	1477.14	3005.18	2822.4	4103.12	3714.2	3655.74	1594.26	2301.85	2124.88	2379.92	3112.67	1402.96	904.769	2896.52	2532.02	3061.72	2479.47	2619.59	2156.37	3194.62	3255.9	2787.47	2279.72	2787.44	2603.76	3170.76	1550.92	3460.13	2302.71	2159.6	2741.19	2725.83	1	2.23102	1.48475	1.39247	1.76746	1.75756	0	1.62498	0.639876	0.518066	1.01307
P13804	ETFA	Electron transfer flavoprotein subunit alpha, mitochondrial	563394	577123	582674	569637	505501	524376	530637	543764	491885	471103	556423	539265	561948	493635	518704	568365	564314	490621	519065	445511	562314	547579	552749	538278	530887	503210	525102	492035	503454	453653	559666	512353	533995	517575	546361	495491	1	0.915463	0.954132	0.924794	0.976228	0.885333	1	0.262755	0.599987	0.344129	0.792686
Q8N1G0	ZNF687	Zinc finger protein 687	8903.6	8762.72	9966.72	8598.94	8667.21	11562.9	10695.7	10372.5	10358.4	9544.94	10732.1	9901.76	9064.15	10846.4	9793.17	9459.69	10529.6	9889.2	10243.2	10134.3	10616.7	10711.2	8760.62	10995.7	10772.6	10598.7	10803.3	11684.8	12521.5	9771.46	8979.84	10506.9	10067.5	10051.2	10371.4	11076	1	1.17005	1.12113	1.11931	1.15496	1.23343	0	0.728504	0.518907	0.511116	0.663856
Q01130	SRSF2	Serine/arginine-rich splicing factor 2	301043	297177	278585	329572	338062	326334	330448	318094	332229	371765	333915	325226	325310	351580	345742	309717	328980	379457	335957	373755	317602	337861	320666	322418	362955	366823	332580	343822	355432	396606	308888	335774	336355	345573	332301	359053	1	1.08704	1.08892	1.11877	1.0758	1.1624	0	0.535956	0.547532	0.731299	0.466718
P28074	PSMB5	Proteasome subunit beta type-5	766349	738067	761671	739765	738498	767721	742667	829814	719006	829304	733171	802845	756309	730583	928836	705548	707345	687340	700196	798186	770565	775942	746028	898978	849433	797427	843520	803788	938318	808674	748870	777702	790349	719723	808189	838346	1	1.0385	1.05539	0.961079	1.07921	1.11948	0	0.322236	0.463576	-0.325754	0.662963
P46100	ATRX	Transcriptional regulator ATRX	4720.2	5040.07	4917.7	5619.53	6482.83	6360.93	6546.41	6880.5	5744.27	7830	7779.33	6824.37	7589.2	6441.23	6503.37	5471.35	7100.09	8127.15	3959.01	5643.71	3616.16	4535	4647.66	3492.99	5896.55	7586.77	7320.01	6960.27	5920.11	7423.64	5356.07	6672.42	7027.5	6060.26	4437.67	7042.16	1	1.24577	1.31206	1.13148	0.828532	1.3148	0	0.780714	0.991304	0.417649	-0.544687
Q2M2I3	FAM83E	Protein FAM83E	1712.25	1572.9	2283.38	1727.43	1435.64	1337.28	1406.62	727.003	1452.33	438.986	1728.86	1315.86	212.265	854.728	1296.14	165.393	1421.74	1757.09	2034.48	373.34	1161.44	1319.67	1073.9	724.456	1527.9	1069.32	744.546	795.101	1208.57	304.385	1746.32	1072.44	1081.57	1150.41	1161.47	824.384	1	0.614116	0.619343	0.658762	0.665097	0.472069	1	0.269064	0.278964	0.353632	0.365631
P35908	KRT2	Keratin, type II cytoskeletal 2 epidermal	120843	199710	163794	147694	126555	67975.9	61235.3	39867.8	122514	118178	69976.8	142250	203227	449537	77974.6	113854	69780.6	49737.7	82666	76576.5	57763.9	95377.9	87758.8	101152	28493.4	80756.1	57711.1	123444	126167	64312.3	151719	81954.3	188593	78523.1	74109.2	90478	1	0.540171	1.24304	0.517556	0.488464	0.596352	1	-0.139184	1.60211	-0.195212	-0.267285
P09012	SNRPA	U1 small nuclear ribonucleoprotein A	227396	208370	213798	228135	211973	222870	211475	225377	221151	239609	191590	256247	209872	210404	229624	249802	244447	219840	236821	214131	231361	255299	248673	310716	259360	228027	246212	238965	287471	263282	217935	224096	219547	233008	261082	252791	1	1.02827	1.0074	1.06916	1.19798	1.15994	0	0.176769	0.046263	0.432437	1.23784
Q8NCE2	MTMR14	Myotubularin-related protein 14	19835	16958.9	21452	17241.8	17596.3	17763	17175.7	19010.6	16317.6	16256.1	19449.3	16670.2	18777.2	18217.7	18575.6	15590.9	16506.9	16582.3	16928.1	18731.6	20389.8	20345.2	17475.8	18987.4	18432.2	15484.3	12307.9	16287.5	15846.8	13519.1	18616.8	17304.6	18338	16867.9	19126.1	14689.1	1	0.929516	0.985024	0.90606	1.02736	0.789025	1	0.665911	0.929015	0.554734	1.12967
Q13416	ORC2	Origin recognition complex subunit 2	31265.5	31266.3	26324.8	27919.3	28732.1	33441.5	37850.1	32268.6	26673.9	32351.9	28719.8	31876.8	27811.6	36741.8	32266.4	29896.6	31051.4	30755.3	23883.3	32645.7	34062.8	32125.2	30667.8	34650.6	41826	30137.1	35117.9	41373.1	38347.7	34673.9	29101.6	32517.2	31483.3	29646.5	34666.5	35929.9	1	1.11737	1.08184	1.01872	1.19122	1.23464	0	0.50021	0.348791	0.0797922	0.81497
Q58FF8	HSP90AB2P	Putative heat shock protein HSP 90-beta 2	1.41633e+06	1.38685e+06	1.52543e+06	1.57446e+06	1.59954e+06	1.3035e+06	1.50163e+06	1.31745e+06	1710632	1.30368e+06	1.61524e+06	1.50277e+06	1.70024e+06	1.22573e+06	1.13502e+06	1.47877e+06	1.31912e+06	1.31052e+06	1775717	1.32786e+06	1.36891e+06	1.17401e+06	1.56431e+06	1075837	1.52026e+06	1.35065e+06	1.44916e+06	1.17047e+06	1.03752e+06	1.07001e+06	1.50052e+06	1.42738e+06	1.4358e+06	1.4424e+06	1.34067e+06	1.21556e+06	1	0.951256	0.956868	0.961264	0.893467	0.810094	1	0.743325	0.77288	0.796024	0.439025
Q9P246	STIM2	Stromal interaction molecule 2	1729.24	1515.75	1728.86	1319.65	1603.2	1599.53	1552.4	1548.19	1895.42	2287.23	1666.64	2001.58	1356.2	1517.53	1837.2	2057.56	1692.9	1460.45	1965.09	1933.92	1993.14	1567.25	1221.57	1680.71	1836.29	1958.07	2258.84	2376.96	2952.91	2114.94	1579.34	1776.56	1675.83	1821.98	1659.79	2332.34	1	1.12487	1.06109	1.15364	1.05094	1.47678	0	0.261907	0.128138	0.322233	0.106841
Q15599	NHERF2	Na(+)/H(+) exchange regulatory cofactor NHE-RF2	57071.8	61006.2	62524.6	60930.9	57630.7	82414	79329.1	67707.3	65399.9	78743.2	68242.5	66326.7	67254.3	76142.7	94733	62363.2	55720.8	55819.3	51726.2	66651.1	66924.4	64796	68795.7	81944.8	76481	63238.4	74248	69294.7	66037.5	66044.1	59832.8	74718.7	74539.9	58456.1	71788.4	67772.5	1	1.24879	1.2458	0.97699	1.19982	1.1327	0	1.87487	1.85234	-0.173398	1.50579
Q9NSE4	IARS2	Isoleucine--tRNA ligase, mitochondrial	220274	220775	230159	210731	205498	198132	199790	220894	205560	202337	218931	216364	222472	206375	185135	220161	225140	213084	222591	209423	214101	220155	221868	210862	190813	202075	202845	199435	195295	189379	217487	205343	209855	218080	211560	197806	1	0.944159	0.964909	1.00272	0.972746	0.909505	1	0.382934	0.612229	1.03011	0.698834
O00443	PIK3C2A	Phosphatidylinositol 4-phosphate 3-kinase C2 domain-containing subunit alpha	13589.9	15799	16201	13917.9	15410.3	15030.5	15351.3	16745	15683.5	18566	13241.7	16989.9	16175.7	14767.8	16086.4	17342.1	15911.4	14425.4	15488	16271.6	17481.3	18766.7	13924.5	14199.1	16155.2	17129.7	18038.5	17151.2	19139.9	17160	14983.6	16275.3	15452.3	15887.7	16105.4	17723.9	1	1.08621	1.03128	1.06034	1.07487	1.18288	0	0.471367	0.171033	0.329922	0.409369
P52948	NUP98	Nuclear pore complex protein Nup98-Nup96	64012.8	79915.2	59513.5	55379.7	83895.7	87876.8	81176.4	81860.9	94346.2	80714.5	87207.5	82706.9	80235.2	79361.3	87870.1	83614.8	83372	90116.6	72492.8	71884.1	77253.9	79301	80025.8	72840.4	79377.9	89361.1	87045.8	82865.5	93514.6	84954.4	68543.4	85195	83476.2	80296.1	77759.8	87548.3	1	1.24294	1.21786	1.17146	1.13446	1.27727	0	0.876173	0.785735	0.618403	0.48495
Q8NFP9	NBEA	Neurobeachin	12230.3	13373.8	9591.67	8497.9	12167.8	10786.1	11179.9	15777.5	11593.6	16313.6	12866.4	13236.6	14162.1	13755.7	10334.2	11822.6	11624.7	10864	21555.2	20894.4	10736.6	9789.98	10085.8	18089.9	13866.3	13980	15404.5	14127.4	15198.9	14623.3	11172.3	13130.1	12871	15352.2	12513.7	14666.8	1	1.17524	1.15205	1.37413	1.12007	1.31279	0	0.560261	0.486103	1.19612	0.383866
P29692	EEF1D	Elongation factor 1-delta	929487	900437	912928	909525	933611	945270	906399	886005	833131	853971	996013	909279	891618	841239	1.1214e+06	965543	917918	852656	873460	959097	926441	925282	1.03512e+06	1.15638e+06	872307	983161	973229	989078	1.04123e+06	960226	917197	884955	951911	913735	983107	989385	1	0.964847	1.03785	0.996225	1.07186	1.0787	0	-0.446642	0.480873	-0.0479652	0.913026
Q9P0P0	RNF181	E3 ubiquitin-protein ligase RNF181	19101.5	17723.1	17662.6	17659.9	17931	23169	17549.9	19003.9	18144.9	21379.5	19205.9	22145.2	18892.8	18503.6	21734.9	19353.8	19674.7	22772.5	13907	16650.6	13311.9	14685.2	16800.1	15277.2	19912.8	19680.8	21954.5	20250.7	26174.3	21158.6	18015.6	19849.5	20096.5	18471.7	15997.4	21843.8	1	1.10179	1.1155	1.02532	0.887976	1.21249	0	0.479037	0.543569	0.119146	-0.527196
P19387	POLR2C	DNA-directed RNA polymerase II subunit RPB3	44758.1	50350.4	73442.9	41701.4	75295.3	95080.9	80465.8	90581.4	93438.6	102741	80720.5	75606.5	86200.3	96216.6	93880.2	69390.8	55638.5	72931.6	71118.2	75679.6	86959.3	85162.4	82633.8	89377.2	98829.6	81592.7	79959.9	79814.9	83147.1	77122.4	57109.6	92461.5	86524.8	68951.7	88592.5	80327.4	1	1.61902	1.51507	1.20736	1.55127	1.40655	0	1.52262	1.26693	0.510045	1.35598
O43592	XPOT	Exportin-T	62974.1	60681.4	57486.1	58638.6	61756.4	63931.9	67642.5	63080.1	69420.6	60727.9	62854.8	55293.6	64679.8	67930.7	60182.2	60626.4	60969	64606.9	61567.9	58891.9	62363.9	59283.8	60222.6	55583.3	55001.5	56946	55392.6	50713.1	43337.9	49257.4	60307.3	64960.6	62188.2	61332.4	58491	51129.4	1	1.07716	1.03119	1.017	0.969883	0.847814	1	1.50701	1.20494	1.11169	0.802103
O95071	UBR5	E3 ubiquitin-protein ligase UBR5	97414.1	89062.3	90417.7	94127.7	98036.6	100964	92525.6	104146	96276.2	105295	85521	102272	95454.8	97664.4	107515	94548.4	95470.6	94663.1	94203.8	102951	101153	103000	88475.3	104818	99069	102944	101911	100642	109483	103191	93811.7	99841.5	97685.6	96367.4	99303	103634	1	1.06428	1.04129	1.02724	1.05854	1.1047	0	0.613876	0.394387	0.260186	0.559053
Q8WUH6	TMEM263	Transmembrane protein 263	32180	25907.4	25810.9	28889.7	26060.3	30582	28396.2	30390.8	31522.8	28597.5	27552.8	30034.4	26169	34320.8	26143.4	24663.5	28311.4	23853.5	23520.3	25293.6	27673.4	28741.2	33653.4	33732.3	26372.8	32058.6	38499.3	36330.1	46150.8	30015.6	27769.7	29897.8	28844.1	25128.5	30034.6	36610.9	1	1.07664	1.03869	0.904889	1.08156	1.31838	0	0.240711	0.121526	-0.298736	0.256184
Q9NQY0	BIN3	Bridging integrator 3	6019.88	11436.6	12783.7	5690.2	9582.16	7544.65	13427.6	19545.7	17760.3	16924.3	15730.4	15303.3	16971.9	16366	20361	11392.5	11409.9	14259.2	15800.5	15436	6546.33	16701.9	16136.3	14648.4	15382.5	11729.8	12767.5	17656.5	18459.1	16593.8	9102.51	15040.5	16946.5	13659.6	13883.1	15441.3	1	1.65235	1.86174	1.50064	1.52519	1.69638	0	0.936763	1.23745	0.718923	0.754175
Q9UI14	RABAC1	Prenylated Rab acceptor protein 1	29434.5	28501.5	29438.1	29978.2	31612.3	35123.6	33897.4	30738.3	28982	31131.5	33544	31161.9	26689.1	28618.7	41360.2	28579.7	23828.3	29298.4	27946.9	31071.3	34096.4	30656.9	37206.6	40145.1	33112.2	32461.4	33098.1	33623.1	35350.2	32604.5	29792.9	31974.5	32274.8	28144.9	35043.4	33427.5	1	1.07323	1.0833	0.944686	1.17623	1.12199	0	0.600251	0.682861	-0.453419	1.44462
P28072	PSMB6	Proteasome subunit beta type-6	1.62267e+06	1.55026e+06	1.62842e+06	1.54017e+06	1.59227e+06	1.68754e+06	1.57083e+06	1.84948e+06	1.63658e+06	1.84971e+06	1535201	1.65758e+06	1.63274e+06	1.55492e+06	1.85329e+06	1.52072e+06	1.53822e+06	1.47374e+06	1.57194e+06	1669973	1.7605e+06	1.67135e+06	1555664	1824457	1.6455e+06	1.70849e+06	1.77983e+06	1.70822e+06	2.04812e+06	1.73562e+06	1.58676e+06	1.71883e+06	1.64675e+06	1.55492e+06	1.69149e+06	1.79606e+06	1	1.08323	1.0378	0.979934	1.066	1.1319	0	0.631004	0.286611	-0.152126	0.500407
O43896	KIF1C	Kinesin-like protein KIF1C	6466.18	6752.34	6828.88	7743.52	8203.04	8524.75	10426.8	10155.6	6190.72	9736.94	7838.69	7255.29	7518.67	10997.9	8864.23	6951.22	8179.58	9760.82	9021.84	10364.3	10232.3	6777.58	7048.51	9291.69	11179.4	9858.75	9937.83	9129.74	9972.41	7543.75	7198.79	9006.95	8494.96	8855.55	8905.9	9288.5	1	1.25118	1.18005	1.23014	1.23714	1.29029	0	0.86527	0.620262	0.79282	0.816912
O00746	NME4	Nucleoside diphosphate kinase, mitochondrial	19762.7	20098	18224.4	18690.7	19461	23420.1	16697.3	25398.3	23720.9	23008	19801.9	20648.3	20980.3	21821.2	21901.3	18256.8	19347.4	20187.7	17077.2	17846	20627.8	20505.8	21073.8	14585.3	20512.3	21750.8	22580.8	22804.2	21383.6	20896.2	19247.3	22448.9	21030.6	18543	19461	21883.1	1	1.16634	1.09265	0.963408	1.0111	1.13694	0	1.21466	0.67656	-0.267204	0.0810673
P23919	DTYMK	Thymidylate kinase	659245	631195	487558	570192	610691	802705	724089	815300	663406	818486	558118	661237	658126	581547	783932	492159	543913	621080	567210	594342	637068	659828	633470	747528	668774	638066	766080	707222	774018	692284	591776	764797	648592	563741	669334	715534	1	1.29238	1.09601	0.952625	1.13106	1.20913	0	1.39807	0.459091	-0.226535	0.626687
Q96CX6	LRRC58	Leucine-rich repeat-containing protein 58	8872.36	9078.39	7430.05	7169.43	8739.06	8496.74	7724.45	7995.42	7733.76	8355.33	7651.98	7292.16	6168.52	5972	5864.1	6222.04	7164.5	7329.07	5840.46	2309.67	6673.04	5499.72	7585.88	7300.6	6871.53	6414.75	6969.27	6928.58	5061.27	6156.68	8257.86	8061.14	6589.76	5773.15	6786.16	6306.11	1	0.976178	0.797998	0.699109	0.821781	0.76365	1	0.899209	0.145328	-0.273071	0.245956
Q9UHB6	LIMA1	LIM domain and actin-binding protein 1	543932	510416	511100	492498	473834	560604	517651	586556	523541	589941	493559	521341	515439	500746	578113	521885	500810	486870	482467	523329	539019	513797	502122	553945	555934	544634	565524	551660	610019	546794	506356	555659	521839	503072	532963	563726	1	1.09737	1.03058	0.993515	1.05255	1.1133	0	0.859378	0.269885	-0.0572394	0.463786
Q6FIF0	ZFAND6	AN1-type zinc finger protein 6	76298.7	107003	115489	56910.2	94107.5	132512	132736	146781	128044	160886	99369.4	153531	100899	122805	121352	123099	127413	118952	123182	119816	148845	118809	104383	143631	153611	115703	138325	118674	154079	128893	89961.6	140192	119591	122492	133856	131135	1	1.55835	1.32936	1.36161	1.48792	1.45767	0	1.21997	0.719632	0.790095	1.06608
P62136	PPP1CA	Serine/threonine-protein phosphatase PP1-alpha catalytic subunit	790549	776697	807231	798033	788349	892152	863566	884677	862307	873524	771263	844392	812690	809090	822656	794717	800835	783343	770478	812156	834831	865738	807078	885554	846387	837993	859370	830238	912688	847005	792172	875245	812018	792306	847917	857459	1	1.10487	1.02505	1.00017	1.07037	1.08242	0	1.27243	0.303986	0.00205744	0.853853
Q9P219	CCDC88C	Protein Daple	33127.2	21290.9	47120.6	30112.7	38862.8	53912.4	48745.2	53664.6	51415.3	55697.8	31594.6	48544.1	46819.4	30825.3	55221.8	27922.7	25046.5	24292.7	44946.2	52298.9	36466.9	43197.3	43433.2	57003.3	48489.8	48736.1	50286.6	42145.7	58259.7	52280.6	34102.9	52687.1	42601	34901.4	45718.1	50341.7	1	1.54495	1.24919	1.02342	1.34059	1.47617	0	1.14443	0.523323	0.0491741	0.715275
P04155	TFF1	Trefoil factor 1	673052	660782	640563	698383	686302	805423	849346	917756	769569	1.00652e+06	588978	925557	640615	743664	841281	884724	654278	772838	697260	752572	862008	807901	659077	1.00581e+06	1.02626e+06	667725	881152	824054	995805	777923	671816	869722	748019	752335	872210	829332	1	1.29458	1.11343	1.11985	1.29829	1.23446	0	1.25642	0.483781	0.511178	1.27222
Q9UKB3	DNAJC12	DnaJ homolog subfamily C member 12	3695.04	4504.15	4310.12	3509.37	4080.2	5185.22	4416.81	5681.4	4802.83	5620.99	4927.43	4853.01	3446.04	4223.15	5880.69	3811.92	4198.81	3978.67	4257.73	4783.41	5895.72	3908.85	3246.53	4952.55	4085.18	5204.27	5830.61	4664.11	4970.95	5222.05	4019.78	5141.45	4666.07	4206.11	4417.77	5178.4	1	1.27904	1.16078	1.04635	1.09901	1.28823	0	0.968111	0.557809	0.160822	0.343503
Q96HS1	PGAM5	Serine/threonine-protein phosphatase PGAM5, mitochondrial	21499.3	23418.1	19625.2	23711.5	24559.2	26364.9	25474.5	26484	27727.7	27976.4	25763.1	24926.8	23507.1	26750.5	22376.4	23513.2	27445.4	27353.6	24903.4	26103.8	23583.2	25366.4	22783.6	24101.3	25904.6	26435.7	25004.3	25347.1	29100.9	31313.1	22562.7	26805.5	24664.8	25863.9	24347.8	27440.2	1	1.18805	1.09317	1.14631	1.07912	1.21618	0	0.869873	0.430979	0.676826	0.365997
Q9NQT8	KIF13B	Kinesin-like protein KIF13B	35029.4	36532.8	33172.8	35214.8	37652.8	37488.5	34681.1	37364.1	36983.4	37437	39467.4	38383.2	37891.7	36938.2	36084.7	38000	41794.7	42772.5	37552.8	41353	39624.6	36227.4	38247.2	35466.2	32832.1	39899.6	38363.5	38465.3	40867	42230	35520.5	36790.8	37753	40294.6	36479.5	39965.1	1	1.03576	1.06285	1.1344	1.027	1.12513	0	0.285809	0.502306	1.07414	0.215767
O14908	GIPC1	PDZ domain-containing protein GIPC1	61884.8	92608	95107.7	60609	110300	124123	138683	143173	131809	131390	132461	122412	111292	139084	134894	127243	129780	137875	100791	70693.8	122251	134294	134258	121272	128458	131681	99601.9	115464	130896	123747	84102	133836	128029	113276	128106	120278	1	1.59135	1.5223	1.34689	1.52323	1.43014	0	1.37477	1.21425	0.806464	1.21641
Q92598	HSPH1	Heat shock protein 105 kDa	306980	299182	310061	315572	306373	343190	319144	341049	336701	343432	305599	316703	309768	314485	351844	305291	308292	320992	311111	333545	320522	319375	301886	339699	333828	329942	324142	320514	352541	351749	307634	336703	319680	315846	323062	335778	1	1.09449	1.03916	1.0267	1.05015	1.09149	0	1.03288	0.428016	0.291817	0.548192
O43172	PRPF4	U4/U6 small nuclear ribonucleoprotein Prp4	78110.6	78686.3	80168.3	78087.2	86360.1	90866.5	89604.8	91664.2	91482.8	94775.8	84655.1	86392.4	84539.6	88592.1	87018	80095.6	83742.4	85414.4	84627.6	88019.5	83278.5	88052.9	78034.9	87670	88336.9	89205.2	86395.6	86819.9	92154	86972	80282.5	91678.8	86239.4	84379.9	85074.6	88309.4	1	1.14195	1.0742	1.05104	1.05969	1.09998	0	1.41977	0.742124	0.510462	0.597013
Q13428	TCOF1	Treacle protein	178721	174467	169042	175065	161978	194387	180701	205150	184247	205294	156622	180349	175291	168027	204828	167371	162546	157330	165081	178536	189186	180653	172196	197196	191986	186471	190675	184140	223786	192723	171854	193955	177023	166173	186243	195559	1	1.1286	1.03008	0.966938	1.08373	1.13793	0	0.932351	0.218055	-0.239693	0.607009
Q9Y312	AAR2	Protein AAR2 homolog	25299.3	24361.6	24123.7	24244.7	29314.7	27326.4	25314.1	27691.9	28084.3	27592	27055.7	24295.2	25063.8	26252.1	23442.7	25863.7	23758.9	25503.6	32711.1	24665.4	23575.1	24314.7	20940.4	21623.2	23951.1	22178.2	19291.8	22725.8	18672.7	22735.2	25468.8	27201.7	25221.9	26500.6	22880.9	21120.7	1	1.06804	0.990306	1.04051	0.89839	0.829279	1	1.39855	0.943215	1.23729	0.404818
O00625	PIR	Pirin	57006	52333.1	49276.7	55093.6	48178	62518.2	62523.7	61095.2	54223.7	51863.4	59417.9	55481.5	54729.4	52530.6	58814.4	57955.1	54436.1	43615.2	50783.3	53502.9	53238.1	59347.8	64629.7	70990.1	60401.4	61310	60227.2	60046.5	58525.4	56373.3	52377.5	58444.8	56194.8	52058.5	61721.4	59296.5	1	1.11584	1.07288	0.993911	1.1784	1.1321	0	0.876913	0.551712	-0.0460954	1.35048
P62979	RPS27A	Ubiquitin-ribosomal protein eS31 fusion protein	4233007	4.22202e+06	4794723	4.78419e+06	4218513	4.30839e+06	3.88283e+06	4764873	4.47262e+06	4.42488e+06	4.09695e+06	5206497	4564694	3.74306e+06	4.20221e+06	4.59106e+06	4406858	3.74729e+06	4.82224e+06	3.75045e+06	4.15891e+06	4.22382e+06	4.56818e+06	5.2621e+06	4.17514e+06	4.75935e+06	4.94478e+06	4957021	5.76386e+06	5269702	4.45049e+06	4.37072e+06	4.36268e+06	4.26358e+06	4.47763e+06	5.13894e+06	1	0.982076	0.98027	0.958002	1.0061	1.15469	0	-0.11587	-0.127544	-0.271494	0.0394239
Q13243	SRSF5	Serine/arginine-rich splicing factor 5	113567	162285	138799	146203	178424	153902	200620	164689	207548	184432	195367	169186	212861	219608	163044	200929	232753	194890	208374	220826	229018	167368	164660	225238	196045	173711	172132	187743	195693	203019	147856	182238	192013	211554	196466	186460	1	1.23254	1.29865	1.43082	1.32877	1.26109	0	0.890653	1.14386	1.65006	1.2592
P41247	PNPLA4	Patatin-like phospholipase domain-containing protein 4	3981.92	2863.02	2999.31	5052.36	5357.65	3892.34	5022.36	3922.12	6090.59	4289.6	4885.18	3500.11	3893.87	6922.08	3477.43	4741.47	4352.15	6533.64	3565.19	5690.2	3497.49	3964.13	4822.36	4230.62	5743.31	6897.37	5667.26	6068.2	5148.35	6489.72	4050.85	4643.4	4535.73	4976.53	4451.58	6054.18	1	1.14628	1.1197	1.22851	1.09893	1.49455	0	0.295782	0.242038	0.462069	0.200033
Q9H6F5	CCDC86	Coiled-coil domain-containing protein 86	21371.2	19175.9	20327.8	17429.9	16564.7	25228	22482.3	23716.3	23454.4	23691.1	17653.8	20993.2	19728.7	23432	26466.4	18167.7	17514.5	18840.2	17323.7	22597	21474.1	21144.5	22396.9	25128.2	25601.5	23537.3	22811.4	21127.4	24081.3	21753.8	18973.9	23714.4	21654.8	18888.6	23149	22662.3	1	1.24984	1.14129	0.995504	1.22005	1.19439	0	1.28527	0.726859	-0.0231303	1.13198
P63172	DYNLT1	Dynein light chain Tctex-type 1	38288.6	33774.6	37846.5	38296.2	38383.1	36078.7	37064.9	36773.2	36333.4	35440.8	35620.2	34259.4	36167.8	38949.6	34772	32257.5	34388.7	38985.9	43279.8	42746.7	34632.2	38056.4	37838.5	40159.9	36600.8	35164.1	31811.6	31705	32816.8	33361.1	37317.8	36338.2	35953.8	38331.7	37457.5	32971.7	1	0.97375	0.963449	1.02717	1.00374	0.883538	1	0.774603	0.686153	1.2333	1.03216
Q9UKN8	GTF3C4	General transcription factor 3C polypeptide 4	74748.5	67752.6	66404.7	69858.3	68004.8	66052.4	60238.2	67153.8	68550.1	65349.3	66649.5	66468.8	68935.2	68610	59074.7	67121	72106.9	71706	66721.9	70177.5	71229.1	68611.3	63554.7	64572.8	62348.7	63756.3	58889.6	61246.2	61673.4	65793.4	69353.8	65468.8	65947.6	69566.7	66063.3	62271.8	1	0.943983	0.950888	1.00307	0.952556	0.897886	1	0.451428	0.519047	1.03006	0.535381
P16401	H1-5	Histone H1.5	1.16302e+06	998898	1.02974e+06	1.02444e+06	1080468	1.0951e+06	1.00833e+06	1.11517e+06	1058157	1.1174e+06	1.06623e+06	1.09316e+06	1.09916e+06	1.17515e+06	1.13874e+06	1.09966e+06	1.1213e+06	1.1169e+06	1.10111e+06	1.17268e+06	1147054	1.15082e+06	1.0668e+06	1.20965e+06	1.08018e+06	1.18551e+06	1.14056e+06	1132315	1.23076e+06	1.18155e+06	1.05931e+06	1.07883e+06	1.11449e+06	1.12233e+06	1.1309e+06	1.17414e+06	1	1.01842	1.05208	1.05948	1.06758	1.10839	0	0.16996	0.480508	0.548769	0.62344
Q9Y478	PRKAB1	5'-AMP-activated protein kinase subunit beta-1	13157.2	12003	10847.7	14058.9	12172.1	14127.1	13260.5	11075.4	11418.9	11150.4	12028.5	10703.5	11670.5	12639.8	10840.1	10789.6	12198.2	10752.7	9001.47	11374.4	10744.4	8968.27	12143.9	12887.1	13551.6	10218.9	10686.4	8389.83	9680.43	10909.3	12447.8	12206.4	11576.5	10823.3	11659.1	9976.97	1	0.980613	0.930004	0.869494	0.936638	0.801506	1	0.902328	0.647365	0.342517	0.680785
Q9BVS5	TRMT61B	tRNA (adenine(58)-N(1))-methyltransferase, mitochondrial	22341.9	30739.9	34355.9	33610.2	34311.5	32188.6	27708.8	35385.5	31840.2	33779	34110.6	38811.3	32740.7	31379.6	32838	35381.8	32060.7	37878	34149.6	32743.9	37354.8	36774.7	36432.7	32656.3	38226.3	39954.3	35132.8	41002.3	41483.6	42051.5	31071.9	32180.4	33976.1	34442.8	36288.9	39924.9	1	1.03568	1.09347	1.10849	1.1679	1.28492	0	0.125217	0.328042	0.380764	0.589297
Q9NVR2	INTS10	Integrator complex subunit 10	41973.9	163448	36083.9	108630	249689	275098	255783	222039	237359	345979	200592	301768	234827	206782	224965	256574	256822	270059	41252.8	41962.3	233702	120720	262158	187900	203119	270074	267684	199036	418645	280084	119965	267252	233787	173334	201520	287104	1	2.22774	1.94879	1.44487	1.67982	2.39323	0	0.88122	0.680999	0.319308	0.487943
O60885	BRD4	Bromodomain-containing protein 4	92554.7	91921.9	85748	80671.7	94087.1	94412	86869.3	98655.4	100532	92602.4	88358.2	96712.4	93706.3	86434.3	95707.1	93023.6	95967.8	92463.3	80408.8	105024	92098.3	88503.2	87998	88376.2	82533.7	96483.9	101443	96635.3	100310	101214	88996.7	94614.2	92183.7	93377.4	87901.9	99217.3	1	1.06312	1.03581	1.04922	0.987698	1.11484	0	0.549623	0.311819	0.428619	-0.107117
Q92994	BRF1	Transcription factor IIIB 90 kDa subunit	10972	10342.1	10053.6	8680.76	10261.1	12776.3	10811.3	13329.3	11430.9	13657.8	9948	13633.4	10378.1	10747.4	13117.3	10811.2	11408.4	11102.4	10318.3	3085.51	11660.2	8177.88	10972.9	14030.3	11868.3	10817	13753.8	11954.4	13665.9	11986.8	10061.9	12401.1	11564.8	9345.16	11341.9	12435.6	1	1.23248	1.14937	0.928766	1.12721	1.23591	0	0.985479	0.633161	-0.301956	0.539249
Q9HBM1	SPC25	Kinetochore protein Spc25	6479.29	6484.43	5570.64	6302.84	6142.21	5756.04	6132.94	4912.31	5404.62	5771.44	6592.56	5061.01	6072.06	5535.74	6289.5	5863.17	5295.58	6646.35	6379.1	5298.34	5629.47	5422.92	6230.61	5457.93	4941.59	5366.32	4784.53	4529.96	4567.79	5594.08	6195.88	5595.47	5910.18	5896.51	5536.5	4968.54	1	0.903095	0.953888	0.951682	0.893578	0.80191	1	0.510804	0.767216	0.756079	0.462759
Q86TX2	ACOT1	Acyl-coenzyme A thioesterase 1	767732	726111	740357	748451	682871	655393	643744	722297	665906	651074	739982	747069	735925	699389	655262	739440	802828	734922	733208	719903	784400	772729	739385	795986	638261	763652	804527	809269	864169	796341	733104	667683	715525	746060	746152	807592	1	0.910761	0.976021	1.01767	1.0178	1.10161	0	-0.878291	-0.236001	0.173933	0.175169
Q9BQE5	APOL2	Apolipoprotein L2	3362.57	4068.02	3340.89	3366.18	2680.6	4536.95	4643.5	4888.64	4644.29	4547.4	3784.9	4429.62	4521.25	4721.74	4537.77	4149.79	4051.46	4614.48	3650.92	3452.35	3319.79	3450.62	3979.91	4446.82	4376.86	4102.52	4538.89	4290.51	4425.18	4724.46	3363.65	4652.16	4399.06	3983.8	3914.8	4416.31	1	1.38307	1.30782	1.18437	1.16385	1.31295	0	1.22405	0.983608	0.589124	0.523578
P61968	LMO4	LIM domain transcription factor LMO4	13940.6	14128	9129.77	15254.6	15000.6	13374.8	5622.48	10086.5	10862.3	10564.4	8838.49	9265.73	12239.1	10007.3	13085.2	11590	9950.27	15076	7702.24	7076.92	12702.4	10276.4	11271.7	13962.3	10456.2	12401.5	7693.04	10086.6	7394.73	6568.82	13490.7	10102.1	10687.2	10279.1	11733.8	8828.95	1	0.748817	0.792185	0.761935	0.869765	0.654445	1	0.273101	0.398606	0.311065	0.623112
O95218	ZRANB2	Zinc finger Ran-binding domain-containing protein 2	242413	222015	211807	221256	199563	240637	218807	264904	228706	249121	206339	228160	218537	202440	264677	219367	218735	201059	206299	241066	234869	242414	216933	291455	226133	243341	259195	235140	283371	242548	219411	240435	224031	217305	242361	252719	1	1.09582	1.02106	0.990404	1.1046	1.15181	0	0.631208	0.138699	-0.0632086	0.689017
P36776	LONP1	Lon protease homolog, mitochondrial	236990	218827	230669	213722	217996	213814	213209	224600	218280	214952	225569	225970	223032	199175	220013	221550	234667	227308	222285	234558	212021	222767	218526	220758	221743	212964	204873	200461	206657	198668	223641	216971	218752	228073	219163	204724	1	0.970174	0.978139	1.01982	0.979976	0.915415	1	0.647389	0.741549	1.23432	0.763271
O76054	SEC14L2	SEC14-like protein 2	8209.04	8173.5	6921.44	8054.13	6364.56	7393.77	6882.68	5859.09	5156.2	5272.53	6361.02	5751.91	9111.67	4363.57	3607.43	5166.45	7068.75	6661.44	6896.69	5920.14	8400.76	6556.16	4481.89	6933.54	5043.77	5399.42	4154.59	6348.41	6586.85	3669.42	7544.54	6112.85	5839.12	6342.69	6283.22	5231.74	1	0.810236	0.773954	0.8407	0.832818	0.693447	1	0.380974	0.262619	0.480351	0.454638
Q13938	CAPS	Calcyphosin	267377	245263	255981	234711	227270	266088	242913	284406	258065	278051	239112	255140	250168	242694	280118	243434	247585	228980	230947	246790	266778	259384	246470	275536	258253	267819	281674	261734	314588	280568	246120	265905	253446	239547	261284	281277	1	1.08039	1.02977	0.973294	1.06161	1.14284	0	0.562755	0.208389	-0.186962	0.431332
P16383	GCFC2	Intron Large complex component GCFC2	22249.6	18558.3	17368.9	18142.9	16729.9	10255.5	14338.5	13083.3	11626.7	17048.9	12679.4	16959	17004	8430.21	12503.2	14951.1	16453.3	11923.3	10085.1	16736.4	19033.3	14127.9	14983	16877.6	10487.5	14399.5	15571	16250.3	10853.3	14742.6	18609.9	13270.6	13515.1	14029.8	15101.9	14363.4	1	0.713091	0.726234	0.75389	0.811496	0.771812	1	-0.257334	-0.19974	-0.0785397	0.173909
Q7L5D6	GET4	Golgi to ER traffic protein 4 homolog	38822.6	32442.2	29647.3	38722	34852.3	27244.7	31379.3	26688.7	31352.9	29507.2	28824.7	31009.1	31014.9	37971.4	28678.1	31236.8	33434.6	37057.5	35678.1	36410.6	27676.7	31165.8	30102.9	30053.7	26524.2	29813.5	26456.5	30517.5	22636.4	29514.5	34897.3	29234.6	31499.6	34763.5	29104.7	27787.7	1	0.837732	0.902639	0.996167	0.83401	0.79627	1	0.203512	0.522106	0.981186	0.185242
Q8NFU3	TSTD1	Thiosulfate:glutathione sulfurtransferase	268213	294817	213062	299771	275165	320593	302776	355362	326307	352303	282860	317682	297497	278193	347320	275102	290101	261535	284534	301545	311492	286447	295433	339516	312580	322137	339842	297508	387956	323895	270206	331468	304710	282563	309093	334267	1	1.22673	1.1277	1.04574	1.14392	1.23709	0	0.956307	0.538615	0.192906	0.607036
Q9Y2S6	TMA7	Translation machinery-associated protein 7	115016	110248	111057	102835	95531.6	121826	109408	126658	116934	129573	99509.2	111151	110152	100995	122447	102054	103861	97197.3	98857.5	104490	115325	109850	107345	113434	113317	115736	122427	118475	143409	123106	106938	120880	108851	101292	111854	124631	1	1.13038	1.01789	0.947207	1.04598	1.16545	0	0.788007	0.108147	-0.31908	0.277885
O95716	RAB3D	Ras-related protein Rab-3D	79594.2	82694.7	85406.5	84035.2	86019.2	96243.6	87556.6	101360	89216.5	99092.7	87644	91092.7	85240	88691.9	94659.8	84714.1	86946.1	86262.8	83501.8	88116.1	88797.1	92075.3	89923.7	94577.1	91352.4	89334.7	91391.9	89425.6	102525	91902.3	83550	94693.8	89465.7	85908.2	91345.1	92916	1	1.13338	1.0708	1.02823	1.0933	1.1121	0	1.18982	0.63161	0.251783	0.832278
Q9BPW8	NIPSNAP1	Protein NipSnap homolog 1	525882	462310	458572	448919	432071	428614	400946	426419	419586	372269	443039	445140	435210	408878	425100	454553	455403	410455	448022	421146	453790	449545	446521	471783	372722	409609	408050	407164	442429	371556	465551	409567	431473	437916	438872	407762	1	0.879747	0.926802	0.94064	0.942695	0.875869	1	0.0312392	0.410313	0.521793	0.538348
P61586	RHOA	Transforming protein RhoA	97056	75982.2	68102.2	82884.8	75148.6	60862.5	61007.1	65562.8	66630.4	65782.3	72300.3	77535.6	66288.5	73097.5	66755	62208.9	77941.5	77368.5	83851.5	70033	74254	65449.3	68002.5	76043.2	71017.6	65883.5	65126.8	67724.1	69238.2	60761.9	79834.7	63969	71195.4	74280.7	70953.3	65746.9	1	0.801268	0.891785	0.930431	0.888753	0.823537	1	-0.126199	0.386752	0.605755	0.36957
Q969U7	PSMG2	Proteasome assembly chaperone 2	35022.2	35472.7	36843.7	37062.6	35514.5	30294.6	29357.6	31161.2	32258.6	26477.1	26396.7	32413.5	33806	33199	34352.3	31676.1	31119.5	36273.5	39860.3	37519.9	37465.5	28865.9	20605.8	33303.5	36299.6	30814.8	26489.1	28032	36853.4	24353.4	35983.2	29909.8	32033.5	35289.9	31308.1	29308.5	1	0.831218	0.890237	0.980733	0.870075	0.814507	1	0.0900902	0.408261	0.89613	0.299572
P20839	IMPDH1	Inosine-5'-monophosphate dehydrogenase 1	57867.9	212328	49055.1	57315.5	250765	53081.6	158589	132137	152162	217780	210160	155237	294982	117584	259395	119849	144808	73065.6	50717.3	53245.8	54013	56323.9	76330.6	60476.4	78395.7	310213	204689	302316	261456	248089	125466	142750	207472	88337.2	65107.9	265353	1	1.13776	1.65361	0.704072	0.518928	2.11493	0	0.123555	0.586229	-0.265422	-0.43148
O75190	DNAJB6	DnaJ homolog subfamily B member 6	40540	49567.1	47873	39553.9	47767.1	47770.8	45066.9	52898.2	46472.5	56519.7	48353.5	48971.2	43871.4	43314.5	50208.2	46669.7	45142.4	45453.8	47622.2	45346.8	49566.2	54001.6	41877.7	50279.4	47729.2	51543.3	51377	50909.4	58498.6	52764.3	45060.2	49745.6	46943.8	46047	48690.8	53018.5	1	1.10398	1.0418	1.0219	1.08057	1.17661	0	0.588745	0.236677	0.123991	0.456207
Q5JTJ3	COA6	Cytochrome c oxidase assembly factor 6 homolog	125645	114465	116558	114876	104540	119350	112033	122397	113768	126599	113377	126729	115837	115909	130930	122388	123833	106105	98192.9	108854	120579	110613	118793	128182	121738	134292	132932	128689	144350	118714	115217	118830	120556	111875	119981	131796	1	1.03136	1.04634	0.970991	1.04135	1.14389	0	0.217908	0.322064	-0.201604	0.28737
P42336	PIK3CA	Phosphatidylinositol 4,5-bisphosphate 3-kinase catalytic subunit alpha isoform	12770.6	13215.3	12068.4	10120	10218.7	8657.69	8528.25	8601.12	7416.59	8125.47	11989.5	11926.8	9777	7488.41	10912.3	9596.56	12178.5	9115.05	3575.21	6406.88	11332.2	9571.32	9992.09	12475.6	10364.1	10767.8	9618.81	4979.77	7263.2	6779.8	11678.6	8265.82	10418.8	8174.45	10747.1	7881.87	1	0.707775	0.892127	0.69995	0.920234	0.674898	1	0.101127	0.668187	0.0770588	0.754643
Q8TD16	BICD2	Protein bicaudal D homolog 2	11818.8	14629.9	16767.2	11471.1	13068.6	17911	16089.4	18126.6	15352.8	18944.8	15038.2	17312.2	15069.8	16261	17080.5	18210.5	14358.5	15420.9	11748.3	14191.9	16268	17041.1	14145.2	19771.6	14500.9	16485.9	17852.4	15224.3	19145.6	17255.7	13551.1	17284.9	16152.3	14786	16345.4	17192.8	1	1.27553	1.19196	1.09113	1.2062	1.26873	0	1.0253	0.714299	0.339101	0.767304
O14980	XPO1	Exportin-1	75880.1	79718.4	78627.9	76677.7	85848.9	75901.5	81921.8	69333	79641.4	74588.6	78765.5	69971.8	84980.5	88937.7	71732.6	79812.7	80582.5	93731.6	77705.5	81340.3	73895	80060.9	70973.5	69534.3	74266.4	68918.2	64554.4	72367.8	54719.4	74239.7	79350.6	76277.3	78877.6	82634.5	73746	66959.9	1	0.961269	0.994039	1.04138	0.92937	0.843849	1	0.751962	0.961827	1.26503	0.547679
P14678	SNRPB	Small nuclear ribonucleoprotein-associated proteins B and B'	664350	620608	618072	622328	618005	633025	566748	683178	612388	690008	622402	640317	630437	527711	667141	647860	627515	622986	603956	624660	659441	642408	641160	665718	663778	694637	699574	646227	772000	679686	628672	637069	617602	625395	654501	698425	1	1.01336	0.98239	0.994787	1.04108	1.11095	0	0.120381	-0.158717	-0.0469829	0.370285
A4D1E1	ZNF804B	Zinc finger protein 804B	760.28	19561.9	818.099	374.845	13016.2	19282.4	15444.5	20030.3	18122.8	18061.1	17502.9	21762.4	19322.3	20874.7	13524.3	19798.1	19592	19907.8	794.799	364.169	337.943	23340.8	466.975	4894.73	11513.1	18043.6	18084.7	23250.1	23064.7	21433.7	6906.27	18188.2	18597.3	12091.4	8110.69	20775.3	1	2.63358	2.69282	1.75078	1.1744	3.00819	0	0.81346	0.842959	0.373861	0.0868425
Q6UX71	PLXDC2	Plexin domain-containing protein 2	2716.72	2059.13	2092.8	2972.26	1951.51	1695.14	671.856	1972.87	458.34	2235.35	1330.85	1904.83	798.743	775.123	1563.19	1908.41	1913.57	1451.43	665.279	1673.89	1482.15	1587.33	2066.24	1484.15	1662.63	329.872	1642.2	1184.46	999.988	1435.35	2358.48	1406.71	1274.55	1522.52	1656.5	1118.37	1	0.596447	0.540409	0.645548	0.702359	0.474192	1	0.232509	0.125934	0.325891	0.433935
Q14974	KPNB1	Importin subunit beta-1	566825	545078	547530	530545	565969	615581	583409	631739	614192	592431	474258	554359	550393	557699	589356	522885	531866	534046	541610	558624	561208	549141	512679	571667	593711	520125	529161	501645	516346	487587	551189	607471	545213	537806	557681	510973	1	1.10211	0.989157	0.97572	1.01178	0.927037	1	2.39947	0.851394	0.667225	1.16142
Q6WCQ1	MPRIP	Myosin phosphatase Rho-interacting protein	24160.7	26547.7	25698.1	28219.6	24813.3	27625.5	24822	29629.5	28410.7	32156.1	25538	29288.9	27288.1	25213.3	31345.4	27334.9	27013.1	26758.9	24508.1	28236.9	28852.3	28674.1	25938.6	27713	27208.6	28748	28793.1	27805.4	32202.9	30758.3	25887.9	28528.8	27734.7	26770.4	27677.3	29661.5	1	1.10201	1.07134	1.03409	1.06912	1.14577	0	0.699821	0.489409	0.233853	0.4742
P49406	MRPL19	Large ribosomal subunit protein bL19m	34261.3	36016.6	32495.7	34211.6	52255.8	44821.4	54359.6	61089.8	61733.5	56622	61639	52051.8	44180.5	51118.8	64369.9	49613	49793.8	66525.1	39962.1	43880.9	32672.3	38723.3	53641.1	37712.9	44215.4	52792.4	38733.8	53357.5	53946.9	55180	37848.2	55725.3	54672	49955	41393	50802.1	1	1.47234	1.44451	1.31988	1.09366	1.34226	0	1.38005	1.29874	0.934603	0.273646
Q9BXW6	OSBPL1A	Oxysterol-binding protein-related protein 1	7276.78	10030.2	7070.52	8145.3	6587.58	10054.6	6711.14	8064.85	6777.82	5796.43	7251.79	8021.33	5649.35	7247.1	5791.22	6209.79	7187.79	5769.81	5237.21	3992.33	4972.39	6769.29	5253.99	7915.41	7508.1	5244.72	4107.69	3565.89	7511.07	5629.34	7822.08	7480.96	6792.16	5679.39	6483.84	5211.74	1	0.956391	0.868331	0.726071	0.828915	0.666286	1	0.869321	0.605445	0.179151	0.48733
Q14849	STARD3	StAR-related lipid transfer protein 3	34249	33794.1	31880.7	35757	34355.6	32459.1	30846.4	34546.1	30382.1	34401.6	35163.1	34285.6	34366	34902.4	35373.1	34848.9	39459.3	34647.8	32567.9	32443.2	33875.9	32853.8	32728.7	33850.2	36741.7	38298.6	36189.4	37802	38562	37278.2	34007.3	32527.1	34818.1	34793.4	34010.1	37626	1	0.956474	1.02384	1.02312	1.00008	1.10641	0	-0.409035	0.224048	0.217243	0.000769751
O94992	HEXIM1	Protein HEXIM1	149757	139581	140892	141090	125050	134467	127171	147057	138187	137780	132443	145169	135212	134237	147378	136382	140441	128993	138040	138294	143105	134640	135259	150779	138236	150198	159616	150634	166277	152049	139274	136932	138888	136430	140404	155755	1	0.983187	0.997227	0.979579	1.00811	1.11833	0	-0.142084	-0.0234364	-0.172575	0.0685452
Q658Y4	FAM91A1	Protein FAM91A1	49609.5	42842.4	42671.4	44616.1	47854.7	43809.1	41152	44353.6	41083.1	40507.7	45046.6	44220.5	43899.2	43622.1	42043.4	43751.5	45119.9	46563.2	44710.4	45132.5	46266.3	44444.8	39322.9	49006.8	43850.9	40263.2	39898.1	39817.2	39669.6	42412.7	45518.8	42181.1	43766.4	45055.5	44578.3	40412.2	1	0.926674	0.961501	0.989821	0.979339	0.887812	1	0.346396	0.656832	0.909272	0.815835
Q96I15	SCLY	Selenocysteine lyase	9987.67	10360.4	9826.44	8639.51	11429.8	11958.4	10743.6	11643.8	10792.9	11423.3	11490.1	11914.2	11854.8	11168.1	12080.6	11288.3	11935.2	10256.2	9341.14	8628.43	9810.46	10330	11385.9	12652.8	10290.2	11060.5	12554.6	11730.2	13971	12118.8	10048.8	11312.4	11701.6	10289.9	10893.9	12287	1	1.12575	1.16448	1.02399	1.0841	1.22274	0	0.564563	0.738434	0.107715	0.377571
Q01581	HMGCS1	Hydroxymethylglutaryl-CoA synthase, cytoplasmic	766792	735164	722554	734542	675637	788039	729633	799037	759759	782757	730114	724380	737127	754964	764994	747732	726070	736043	713499	737519	753340	764624	719343	796166	718244	773165	793765	792811	877941	777471	726938	771845	742316	732173	750343	803031	1	1.06178	1.02115	1.0072	1.0322	1.10468	0	0.590165	0.202098	0.068797	0.307593
Q9BSW2	CRACR2A	EF-hand calcium-binding domain-containing protein 4B	67942.7	62335.8	58417.6	58375.9	61440.8	54190	55073.4	56453.4	58202.9	54948.9	55009.1	54032.7	56378.7	56102.5	54668.5	57062.8	57721.2	59363.2	54828.7	60434.1	59435.7	62586.4	55162.8	56317.4	51313	54011.3	55155.7	55247.7	57283.8	55194.6	61702.6	55773.7	55238.3	57882	56963.1	55378.6	1	0.903913	0.895235	0.938081	0.923188	0.89751	1	0.0624773	-0.0221936	0.395854	0.250543
Q9Y5Q8	GTF3C5	General transcription factor 3C polypeptide 5	24585.4	20249.4	17225.8	23690.1	22976.1	18119.8	20183.5	16064.3	17674.8	18527	20816.1	18597.4	18353.8	21149.4	20899	15814.8	21023.2	18365.2	22162.3	19921.8	17515.7	18482.9	19194.1	18185.5	17872.5	17885.4	14516.8	17262.2	19479.6	16102.4	21745.4	18113.9	19963.1	19457.5	18250.1	17049.3	1	0.832999	0.918042	0.894787	0.839266	0.784043	1	0.226696	0.62049	0.512808	0.255715
A1L170	C1orf226	Uncharacterized protein C1orf226	8970.97	14024.7	10208.8	9069.69	13744.3	11678.7	14458.9	15529.1	15642.3	15277	12142.8	12368.2	10571.7	12046.4	16317.8	15886.4	12953.1	13065.5	7723.98	7872.06	16325.5	14723.9	16270.4	17643.5	16808.3	15107.9	16086.8	12633.8	15567	15674.8	11203.7	14517.2	12689.4	11500.2	16354.3	15014.1	1	1.29575	1.13261	1.02646	1.45973	1.3401	0	0.8696	0.389907	0.0778138	1.35175
Q13557	CAMK2D	Calcium/calmodulin-dependent protein kinase type II subunit delta	70255.5	69072	70709.2	76633	82850.3	78801.1	78553.4	82029.3	81440.3	88483.9	68450.1	71901.1	72529.2	77675.8	80177.6	70670.1	72907.2	78712.3	77540.6	78069.3	77807.9	78574.6	72478	82279.6	83013.7	83651.7	82184.6	77923	86971.2	89452.3	73904	81861.6	74146.8	75579.9	78830.8	84036.6	1	1.10767	1.00329	1.02268	1.06666	1.1371	0	0.785347	0.02396	0.165401	0.486233
Q9BRP8	PYM1	Partner of Y14 and mago	91388.9	93629.8	95460.5	78267.1	82110.3	98324.8	93799.7	108346	96544.3	112321	88230.4	93119.7	91082.4	95985.4	109573	92028.2	86617.6	88170.9	92024.1	99357.9	97909.5	99997.6	87067.1	102053	100023	100420	102531	94702.1	103848	99055.6	88171.3	101867	95598.1	91639.7	97410	100111	1	1.15533	1.08423	1.03934	1.10478	1.13542	0	1.14704	0.622009	0.290486	0.773761
Q9BSH5	HDHD3	Haloacid dehalogenase-like hydrolase domain-containing protein 3	174078	163642	168922	159390	169730	159901	154256	174112	162222	167486	170945	172877	173939	152407	158933	166998	174540	153554	160046	164077	177024	177808	162083	180202	156926	182552	181368	175655	203760	180244	167152	163596	165820	163843	170809	184716	1	0.978722	0.992032	0.980201	1.02187	1.10507	0	-0.202504	-0.0758325	-0.188431	0.208182
Q13227	GPS2	G protein pathway suppressor 2	26635.2	25036.1	26093	23792.1	23623.5	27005.8	25637.2	29818.2	25979.8	28004.9	25433.7	27405.3	24365.4	24431.5	28910.8	24156.1	25829.7	21905.5	23498.9	25531.6	26689.3	24735.5	24945	25864.5	22936.4	27016.5	30087.5	27304	30441	27615	25036	27289.2	26109.3	24184.4	25034.1	28492.8	1	1.09	1.04287	0.965984	0.999926	1.13807	0	0.651812	0.310495	-0.246364	-0.000538118
Q86UQ4	ABCA13	ATP-binding cassette sub-family A member 13	871.065	4773.93	2292.69	821.932	7117.62	1005.32	22467.6	5998.44	4259.05	556.343	1409.7	8823.46	4372.06	7549.66	5017.9	925.303	3769.29	3204.74	6037.05	986.717	899.941	1975.93	5776.04	3905.01	5038.45	793.232	347.566	760.897	343.351	975.201	3175.45	6857.34	5434.56	2984.62	3519.08	644.049	1	2.15949	1.71143	0.939905	1.10821	0.202822	1	2.45449	1.89244	0.924615	1.13575
Q8TBX8	PIP4K2C	Phosphatidylinositol 5-phosphate 4-kinase type-2 gamma	112580	110843	117497	102984	104353	120831	100948	120625	100714	109982	109633	117359	111724	116124	104314	113415	119555	113860	108913	116550	117449	122859	113883	127905	110939	117562	121811	119483	136310	119764	109651	110620	111831	114459	118607	122986	1	1.00883	1.01988	1.04384	1.08167	1.12161	0	0.0726329	0.16345	0.360499	0.6716
P28066	PSMA5	Proteasome subunit alpha type-5	1.065e+06	960884	971197	951967	945051	1.03393e+06	956749	1.06402e+06	1.02359e+06	1.05617e+06	935900	1.00738e+06	980736	1.00137e+06	1.12121e+06	956127	975432	911373	953412	1.04307e+06	1.05999e+06	1.02989e+06	974036	1.12763e+06	1.06794e+06	1062187	1.07126e+06	1047656	1.17605e+06	1.04434e+06	978819	1.02689e+06	1.00932e+06	967882	1.0519e+06	1.0803e+06	1	1.04911	1.03116	0.988826	1.07466	1.10368	0	0.473731	0.300544	-0.107773	0.720134
P68104	EEF1A1	Elongation factor 1-alpha 1	12953233	13022057	12777342	12659781	13356058	12294381	11888658	13668002	12368001	13902760	13949588	13656192	13568530	14537574	12696424	13801322	14406116	15182759	13067606	14667991	13800726	13957616	13657357	13742181	11757561	14452021	13177729	14065862	14520403	15146557	1.29537e+07	1.28244e+07	1.36817e+07	1.42252e+07	1.33831e+07	1.42725e+07	1	0.990016	1.0562	1.09815	1.03315	1.10181	0	-0.0980678	0.551984	0.964092	0.325589
P60866	RPS20	Small ribosomal subunit protein uS10	297924	300475	291446	314502	362023	361851	359330	343276	350292	377789	346066	339141	346982	376890	355214	328308	342374	388598	334797	372265	329278	346414	342434	335795	370486	369477	332537	354018	348517	398842	313274	358508	352859	353268	344882	360678	1	1.14439	1.12636	1.12767	1.10089	1.15132	0	0.954214	0.835044	0.843686	0.666768
Q9H8M7	MINDY3	Ubiquitin carboxyl-terminal hydrolase MINDY-3	22694.4	21034.8	21579.3	21368.4	19612.8	17596	16987.6	20145.6	17754	16645.1	18330.3	19995.2	18736.1	17954.5	17052.2	22403.7	20598.8	18553.9	21885.6	19094.3	20503.3	20965.3	20182.2	19340	15789.1	18271.8	19388	18728.4	19566	17423.2	21257.9	17825.6	18413.7	20507.3	19356	18675.5	1	0.838541	0.866202	0.964688	0.91053	0.878519	1	-0.329088	-0.101386	0.709322	0.263503
O60218	AKR1B10	Aldo-keto reductase family 1 member B10	18788.7	15992.3	18360.7	18296.8	15499.7	18905.7	17915.6	17881.7	19163	18262.1	16965.4	16857.4	17249.3	15781.5	19614.3	16129.6	15207	16711.3	16647.9	15590.2	17698.7	16360.6	16498	17368.2	18576.6	18649.7	20504	20762.6	21588.1	20189.9	17387.6	18425.6	17293.6	16057.2	17300.4	20338.9	1	1.0597	0.99459	0.923484	0.994983	1.16973	0	0.351707	-0.0318765	-0.450811	-0.0295568
P67936	TPM4	Tropomyosin alpha-4 chain	478790	421602	425081	399696	377664	460338	419456	486277	433135	473142	409517	433763	422206	403224	503753	432267	426081	387530	389547	432491	463394	451376	420714	469886	447146	450439	493296	471881	554154	471196	420567	454470	434492	413583	450503	488193	1	1.08061	1.03311	0.983395	1.07118	1.1608	0	0.501325	0.205923	-0.103266	0.442674
Q9UBR2	CTSZ	Cathepsin Z	394640	384862	403066	375092	376203	383875	365342	390022	374828	399694	374993	404691	391236	392882	401411	381836	401476	375830	375675	416198	417360	409899	385209	412388	401342	420184	421227	406038	464499	408951	386772	382752	393043	390203	405239	424180	1	0.989606	1.01621	1.00887	1.04775	1.09672	0	-0.10747	0.167618	0.091715	0.493673
Q9Y5P4	CERT1	Ceramide transfer protein	33183.1	36018	34969.3	36084.5	38053.2	41084.3	38874.2	41148.7	38441.2	39870.5	35919.8	37158	36359.3	36878.9	37405.1	35826.9	34802.8	35692.1	33862.6	35546.4	38324.7	36429.3	35567	38283.9	35274.2	40292.7	40647.5	38382.2	41168.7	38046.8	35661.6	39883.8	36744.2	35146.2	36775.8	39707.6	1	1.11839	1.03036	0.985546	1.03124	1.11345	0	1.04355	0.26758	-0.127402	0.275386
O00459	PIK3R2	Phosphatidylinositol 3-kinase regulatory subunit beta	2991.17	2241.64	3078.49	3277.17	2947.04	1897.01	2898.81	2104.31	2073.72	2460.94	6965.01	2423.15	1679.73	3432.92	1304.96	2183.03	2969.32	3394.95	2290.36	2911.33	2581.89	3629.52	3163.33	3470.31	2419.31	2004.03	2249.73	1089.98	1093.36	2397.46	2907.1	2286.96	3161.15	2749.8	3052.87	1766.91	1	0.786679	1.08739	0.94589	1.05014	0.607791	1	0.456105	1.22281	0.862038	1.12785
Q92599	SEPTIN8	Septin-8	100300	96366.6	106522	96589.6	92255.7	98968.6	99023.9	113252	101477	111547	97349.1	104131	99686.7	101200	110515	103649	103558	90610	96443.8	103391	108506	101625	99412.4	112690	98056.4	106822	111962	108249	119826	103227	98406.8	104854	102576	99530.4	104058	110017	1	1.06551	1.04237	1.01142	1.05743	1.11798	0	0.555279	0.359128	0.0967724	0.486745
Q5T8D3	ACBD5	Acyl-CoA-binding domain-containing protein 5	13841.2	17523.7	13140.2	14343.3	13087.1	16237.9	17771.1	18286.7	19412.3	17679.8	16927.7	16617.1	14643.1	18170.1	18055.9	18061.3	17942.8	19174.4	13687.1	15630.4	14830.3	15028.1	16837.9	15060.3	15400.2	16308.7	16259.8	17215.4	18076.3	19468.3	14387.1	17877.6	16882.8	16899.2	15431.4	17465.7	1	1.24261	1.17347	1.17461	1.07258	1.21398	0	1.13379	0.810666	0.815995	0.339203
Q86SF2	GALNT7	N-acetylgalactosaminyltransferase 7	5035.54	7208.78	5417.39	4868.21	7399.92	7314.37	8914.28	8677.49	7417.01	4527.6	7470.26	6746.15	8680.21	5621.37	6714.04	7446.03	7968.19	12851	6092.04	5393.56	6283.3	4337.99	3328.81	5315.33	4416.44	8464.28	9144.52	7582.98	6616.46	8964.35	5985.97	7370.15	7046.41	7950.17	4736.37	8154.52	1	1.23124	1.17715	1.32813	0.791246	1.36227	0	0.638299	0.489008	0.905768	-0.576235
Q9BZD4	NUF2	Kinetochore protein Nuf2	2751.17	2954.94	2674.21	3021.69	3397.34	2982.56	4611.46	3189.09	3723.03	5221.23	3063.52	3704.49	3077.88	3837.63	4168.2	3342.98	3412.43	3373.04	3891.76	3385.34	3375.76	3669.9	4859.99	3793.52	4223.39	3361.06	4009.44	3752.89	3911.95	3788.41	2959.87	3945.47	3570.34	3481.11	3984.51	3764.75	1	1.33299	1.20625	1.1761	1.34618	1.27193	0	1.22454	0.758467	0.647601	1.27304
Q9Y2W1	THRAP3	Thyroid hormone receptor-associated protein 3	112346	106501	112289	95256.6	95521.1	114395	106442	125241	109893	120585	103046	112352	108258	107957	125645	100831	107304	97375.5	102625	115529	113538	112363	100785	124494	121022	112343	116181	117210	131649	119061	104383	115311	111452	104733	114440	119289	1	1.1047	1.06772	1.00336	1.09636	1.1428	0	0.733175	0.474245	0.0234982	0.674748
P24043	LAMA2	Laminin subunit alpha-2	65298.9	44947.4	61821	47115.3	60909	60034.3	61903.7	69006.6	57697	61304	57310.7	67709.7	59510.8	55470.9	61672.1	67093.1	60182.5	54503.6	70028.2	55464.2	59220.6	68514.3	63921	62755	56270.5	65545.8	72711.8	64056	73229.5	71642.4	56018.3	61989.1	60334.8	61454.3	62136.3	69437.1	1	1.10659	1.07706	1.09704	1.10921	1.23954	0	0.444959	0.321679	0.405106	0.455926
Q63ZY3	KANK2	KN motif and ankyrin repeat domain-containing protein 2	7801.93	9274.36	7829.52	7254.49	7570.55	9729.69	8919.92	10367.7	9078.09	9861.12	9613.2	9314.78	9353.2	9751.23	10378	9080.61	8644.08	8714.93	7282.4	8219.32	8721.98	8645.24	8808.88	9353	8372.55	10276	9565.89	9160.62	10063.1	8804.09	7946.17	9591.3	9682.08	8388.27	8780.33	9573.94	1	1.20703	1.21846	1.05564	1.10498	1.20485	0	1.01067	1.06644	0.271596	0.512456
P09496	CLTA	Clathrin light chain A	663877	620113	659486	595554	564500	649396	604347	703011	614964	696638	563980	642455	615540	556872	689365	621208	610222	566763	595425	641430	711935	680202	629511	721019	639102	664907	707371	673774	796170	687401	620706	653671	613642	607010	676354	705925	1	1.05311	0.98862	0.977934	1.08965	1.13729	0	0.386832	-0.0828881	-0.160719	0.653001
P27986	PIK3R1	Phosphatidylinositol 3-kinase regulatory subunit alpha	1233.69	786.868	5838.95	3349.59	1681.05	5725.89	2781.01	4083.43	1529.26	4838.54	6098.15	6063.61	2410.38	4738.59	5251.47	7056.59	5107.06	5442.45	4979.16	2928.57	4555.38	4581.43	6792.59	4311.02	5733.03	4979.24	6430.05	5706.28	4116.5	5481.95	2578.03	3791.63	4912.44	5102.77	5194.69	5342.8	1	1.47075	1.9055	1.97933	2.01498	2.07244	0	0.43895	0.84434	0.91318	0.946428
O14617	AP3D1	AP-3 complex subunit delta-1	61383.8	54389	54978.9	58879.5	58706.5	51513.7	50490.9	50569.2	49759.6	52952.4	54663.3	52745.3	55709.5	53400.1	50085.8	54952.1	55714	57960.2	59213.7	64127.6	53019	54134.9	53090.1	49996.7	49535.2	51598.3	49714.5	51382.2	49900.4	55985.4	57667.6	51057.2	53320.8	58393.5	51955.2	51716.2	1	0.885371	0.924624	1.01259	0.900943	0.896798	1	-0.110727	0.269623	1.12198	0.0401637
Q96FX7	TRMT61A	tRNA (adenine(58)-N(1))-methyltransferase catalytic subunit TRMT61A	33884.5	32045.2	32654.9	32343.1	31012.4	30620	28317.9	27620.9	27433	27557.4	29365.5	31604.8	29390.9	27907.6	31633.6	33253.2	29573.6	27153.3	29023.7	29223.8	29599.2	30284.8	30839.4	35520.7	30676	26701.8	30554.7	28470.4	30796.8	27607	32388	28309.9	29980.5	29645.5	31384	28826.1	1	0.874084	0.925666	0.915324	0.969001	0.890025	1	-0.144948	0.324081	0.230046	0.718124
O00165	HAX1	HCLS1-associated protein X-1	1111.21	1732.76	1648.35	812.598	1687.49	2194.58	1468.45	2172.02	1181.87	2204.73	1438.35	2149.08	1946.97	1746.18	1440.84	2358.36	1989.49	1907.55	1384.62	2052.88	2412.19	2415.63	2015.04	2215.17	1607.53	2014.09	2066.56	2328.56	2056.46	2444.63	1398.48	1844.33	1744.28	1938.58	2133.11	2182.06	1	1.31881	1.24727	1.3862	1.52531	1.56031	0	0.568993	0.441313	0.689272	0.937535
Q13043	STK4	Serine/threonine-protein kinase 4	47388.8	44030.4	42546.5	45741.8	43870.8	43826.3	46922.8	40959.4	45086.6	40833.9	41729.1	41371.9	42264.6	45345.3	44442.6	40667.3	43214.8	42218.1	45578.5	45367.9	43499.4	41364.4	39072.6	44660.8	44240.1	39933.8	40702.4	42181.6	38814.6	41163.8	44715.7	43525.8	43030.7	43409.3	42567.4	40559.2	1	0.973391	0.962318	0.970785	0.951958	0.907048	1	0.713732	0.594614	0.685704	0.483158
O15091	PRORP	Mitochondrial ribonuclease P catalytic subunit	10724.8	14808.4	13960.2	16500.9	15783.9	21172.5	18742.6	21236.3	19400.7	22155.5	19368.7	19174.3	17612.9	19784	19216.6	14041.8	14516.9	16762.1	16885.7	16715.8	19667	13886	18047.1	21892.4	18511.6	19189.2	16845	16434.3	18179.4	19934.4	14355.7	20541.5	19031.3	15784.5	18400.8	18116.4	1	1.4309	1.3257	1.09953	1.28178	1.26197	0	1.64483	1.24327	0.379928	1.07561
P55347	PKNOX1	Homeobox protein PKNOX1	3703.15	4089.23	1805.74	4039.1	2540.57	2031.62	2670.84	2580.04	1706.61	1820.77	1865.25	2901.83	1762.64	2765.19	2986.99	2255.04	1593.32	2289.52	1735.93	1419.05	2109.72	786.292	2153.51	1376.74	2176.81	2004.02	1856.11	1911.92	1673.72	2125.17	3235.56	2161.98	2456.38	1858.57	1720.61	1914.19	1	0.668192	0.759183	0.574421	0.531782	0.591609	1	0.187524	0.410326	-0.0420883	-0.146495
Q32MZ4	LRRFIP1	Leucine-rich repeat flightless-interacting protein 1	174812	167491	182089	159177	159544	196230	176903	205551	183143	204468	161636	173570	168646	165944	201518	165090	171588	151342	162512	172172	189319	174957	164913	190432	175147	184226	199613	178285	214922	180949	168622	193259	174263	164541	178953	191599	1	1.14611	1.03345	0.975793	1.06127	1.13626	0	1.07224	0.24548	-0.17765	0.449627
Q8NE71	ABCF1	ATP-binding cassette sub-family F member 1	45561.4	47672	42765.4	50342.4	40765.7	49152.7	52018	43653.3	52511	59666.8	51611.1	50073.6	50134.8	50387.9	55048.4	52332.1	50716	57621.6	53964.6	58589.4	49912	51936.5	53603.2	52169.7	54864.8	58235	48103.8	52083.5	49695.9	60304.8	45421.4	51400.4	51451.2	54644.7	52497.3	53684.6	1	1.13163	1.13275	1.20306	1.15578	1.18192	0	0.723566	0.729712	1.11619	0.856309
P62854	RPS26	Small ribosomal subunit protein eS26	126563	195931	119500	145054	214110	214474	220707	204782	204393	242055	222870	202978	191984	219022	223415	205253	207955	218109	149788	171407	128232	144613	209124	189989	231144	210858	198238	211041	209139	245171	160232	217282	212054	190502	180620	214889	1	1.35605	1.32342	1.18892	1.12725	1.34112	0	1.04378	0.948128	0.553828	0.373028
Q14684	RRP1B	Ribosomal RNA processing protein 1 homolog B	5690.47	6583.3	6962.84	5205.9	5817.95	4316.71	4188.09	3371.54	4083.15	6187.74	6312.74	6894.74	5804.65	4059.66	6106.88	5750.6	7623.54	6168.47	6496.36	6581.54	6981.83	5663.93	5759.59	6709.62	6915.99	7325.18	8000.71	7484.21	7829.74	6702.62	6052.1	4429.44	5835.74	6524.1	6406.19	7468.49	1	0.731886	0.96425	1.07799	1.05851	1.23403	0	-1.14562	-0.152754	0.333246	0.249997
Q9H0W8	SMG9	Nonsense-mediated mRNA decay factor SMG9	58899.8	58637	55494.7	43687.3	63955.8	68659	67068.4	67983.4	52265.7	70449.1	64380.7	66198.9	69461.2	69085.2	52435.6	47060.8	43653.1	40450.9	34746.5	51151.6	64295	65188.2	60776.8	64962.9	64790.4	63560.3	69744.9	65287.9	70022.5	67023.9	56134.9	65285.1	64312.3	43412.6	64002.6	67127.9	1	1.163	1.14567	0.773361	1.14016	1.19583	0	0.832368	0.743878	-1.15732	0.715706
P20339	RAB5A	Ras-related protein Rab-5A	26789.1	25624.3	27409.1	26385	23657.2	27747.2	28433.3	24631.6	26691.4	25527.3	24784	24206.8	25821.2	26194.9	24152.7	25709	26898.2	27830.6	27862.1	27357.7	25501.4	29210.5	25716.9	26322.5	26671.3	21741.5	22728.7	23715.8	20167.6	24494.4	25973	26606.2	25031.9	27131.5	26684.5	22569.6	1	1.02438	0.963768	1.04461	1.0274	0.868966	1	1.18605	0.723494	1.34042	1.20907
Q8WWI1	LMO7	LIM domain only protein 7	30236.1	29510.3	29694.6	23426.5	25641.6	31452.3	33088.2	33938.8	30920.5	36436.3	28692.3	30769.6	29460.3	29164.7	34391.6	25442.5	30443.8	27084.2	27345.9	28706.6	29992.1	33537	29398.8	29434.5	31115.1	31312.7	31942.1	31913	38883	32299.2	27701.8	33167.2	30495.7	27804.6	30695.5	33270	1	1.19729	1.10086	1.00371	1.10807	1.201	0	0.981537	0.501762	0.0184586	0.53764
Q14004	CDK13	Cyclin-dependent kinase 13	142500	138385	140456	131414	138825	133519	133745	135012	139613	130383	134532	141286	134257	120696	133715	140316	149547	131533	138616	142557	144691	139749	142648	148696	130263	127341	125685	129505	132010	128638	138316	134454	132897	140514	141209	128636	1	0.972083	0.960823	1.01589	1.02092	0.930014	1	0.601097	0.440217	1.22704	1.29892
O95758	PTBP3	Polypyrimidine tract-binding protein 3	28082.8	20712.9	40935.4	27217.5	29525.9	37404.8	41755.1	35235.6	36730.8	42770.2	36549.5	40084.9	41614.1	32630.7	39020.3	39387.5	42094.1	45617.3	37937	46195.3	37175.1	42046.3	40339	43345.1	39764.7	40201.9	34794.6	43914.4	36658.2	39496.8	29294.9	38779.3	37979.9	42246.2	40534	39013.2	1	1.32376	1.29647	1.4421	1.38366	1.33174	0	0.975934	0.893676	1.33268	1.1565
Q13643	FHL3	Four and a half LIM domains protein 3	7946.15	7848.75	5826.19	6730.21	6657.18	8110.73	5212.96	8908.94	7806.97	9183.38	7598.91	9539.18	7562.02	7233.07	9911.42	7957.08	6813	3913	6282.66	5678.18	5349.12	5682.5	8719.36	8371.01	9196.44	8588.28	8076.73	8509.56	8402.88	9654.5	7001.7	7844.6	8368.92	6128.78	7463.68	8646.39	1	1.12038	1.19527	0.875328	1.06598	1.2349	0	0.512496	0.831295	-0.530747	0.280896
Q9H270	VPS11	Vacuolar protein sorting-associated protein 11 homolog	10468.8	10647.7	10858.1	11277.7	13801	13797.6	13475.8	13788.7	14315.2	12916.7	12637	13573.1	11853.3	12216.6	13301.8	11654.4	12583.5	14884.5	12435.4	14079.7	12023.3	6938.8	11609.2	13622.5	13328.7	13739.3	12274.9	13354	14690.5	15363.7	11410.7	13658.8	12716.4	13127.5	11504.5	13884.5	1	1.19702	1.11443	1.15046	1.00822	1.2168	0	0.908776	0.527804	0.693992	0.0379313
Q6W4X9	MUC6	Mucin-6	85640.6	86403.6	87627.8	77880.2	88368.4	89305.2	84215.4	94663.8	85414.5	93661.6	80847.1	88319.9	85998.5	82487.6	96637.9	82119.3	80505.6	79684.5	84335.7	90784.1	92115.9	92489	83797.2	92136.6	93600.6	96086.2	93431.2	88922.7	103575	92503.1	85184.1	89452.1	86858.2	83485.9	90827.9	94903.5	1	1.0501	1.01965	0.980064	1.06625	1.1141	0	0.439119	0.172242	-0.17473	0.580666
Q9BVC5	C2orf49	Ashwin	18827.5	20573.5	18396.9	17916.3	18308.7	17847	20170.4	20112.5	18246.4	19380.7	21007.7	18745.1	21087.9	20252.9	19172.1	19622.1	20180.7	24732.2	23150	18016.3	24368.3	20012.6	19046.9	16335.5	20688.1	24907.3	18595.9	22620.7	21948.9	23833.6	18804.6	19151.4	20053.1	21140.3	20090.3	22381.3	1	1.01844	1.0664	1.12421	1.06837	1.1902	0	0.0969725	0.349076	0.65303	0.359471
Q9Y244	POMP	Proteasome maturation protein	18033.1	16907	16310	13945.9	16102.1	16822	16213.5	18665	17052.2	18639.2	17622.7	17342.1	18217	16732.1	16548.7	18346.3	19853.8	16507.4	16397.6	17640.1	19445.5	18372.7	16727	17398.6	18206.6	17896.6	19663.2	18354.5	20113.9	18851.8	16259.6	17478.4	17292.5	17749	18030.1	18976	1	1.07496	1.06352	1.0916	1.10889	1.16706	0	0.44867	0.380243	0.548305	0.651765
Q96PV6	LENG8	Leukocyte receptor cluster member 8	910.429	1483.03	1257.08	1109.28	869.685	913.438	817.146	586.816	913.863	768.285	951.008	1059.32	405.325	927.909	400.224	1034.03	628.278	1088.71	736.243	1145.3	882.805	827.416	821.815	724.062	660.645	591.242	578.51	417.978	838.658	832.765	1125.9	799.91	748.756	926.512	783.349	651.83	1	0.710462	0.665029	0.822908	0.695753	0.578942	1	0.312358	0.204455	0.579413	0.277424
O75582	RPS6KA5	Ribosomal protein S6 kinase alpha-5	25175.7	42465.6	59127.4	26861.8	58463.5	65846.8	78089.1	67458.6	69143.3	86181.9	78913.5	64382.4	72338	99234.2	75920.5	126865	77452.8	96684.5	56702	77361.1	107761	74691.1	89371.5	69132.7	90831.3	70642.1	55023.9	68874.7	60627.8	70540.6	42418.8	73343.9	78157.7	87013.1	86357.6	65141.8	1	1.72904	1.84253	2.05129	2.03583	1.53568	0	1.36096	1.57281	1.96252	1.93367
Q9BXT2	CACNG6	Voltage-dependent calcium channel gamma-6 subunit	94651	92721.7	93844.4	96300.7	97729.5	94645	90033.9	91135.5	97280.8	100563	102280	105598	107339	109538	90544.2	101875	107324	129905	99565.8	102189	106640	105575	104616	96172.1	92048.5	104793	95526.9	110435	103564	117782	95049.5	94731.7	103060	108172	101010	106420	1	0.996656	1.08428	1.13806	1.06271	1.11963	0	-0.0279491	0.704491	1.15405	0.524239
Q99459	CDC5L	Cell division cycle 5-like protein	100351	96748.2	98773.3	96582.4	97847.1	94788.5	94185.7	100321	93517.6	100528	99190.1	102682	97886.2	104401	100978	103268	104354	100935	102446	106709	105509	101543	100752	103882	102842	103820	102083	104268	113791	108071	98060.3	96668.3	101028	103542	102906	106407	1	0.985804	1.03026	1.05591	1.04941	1.08511	0	-0.166784	0.355525	0.65683	0.580555
Q96ER3	SAAL1	Protein SAAL1	29919.5	31753.1	29041.7	28199.7	27171.5	24198.2	26643.6	28690.5	25577.4	25529.5	28797.4	24695.4	28871.6	25682.9	25002.4	27868.3	26571.9	22080.9	23957.3	23896.3	27130.5	25105	26948.8	26446.9	25186.2	24041.1	27067.1	28009.9	24191.9	22049.7	29217.1	26127.8	26609.9	24874.9	26163.5	25071.9	1	0.894265	0.910765	0.851382	0.895485	0.858125	1	0.254729	0.371031	-0.0475284	0.263328
P31150	GDI1	Rab GDP dissociation inhibitor alpha	203294	169269	172005	183492	164171	173803	155793	178139	168181	156919	151752	163010	159456	157055	153790	158846	159760	150364	167628	166333	164200	160252	153555	175594	171371	156034	158083	157422	167451	149453	178446	166567	157013	160586	164994	157689	1	0.93343	0.879889	0.899915	0.924617	0.883677	1	0.427715	-0.0325686	0.13959	0.351947
Q15596	NCOA2	Nuclear receptor coactivator 2	13392.2	12480.2	15459.1	11840.6	13123.8	15500.6	12768	16002	14976.2	15167.6	14357.3	13626.8	14758.8	10636	16482.4	12171.4	13164.3	12567.1	12724.7	12091.6	15749	13866.5	13184.1	16335.5	13521.9	15141.8	16350.8	15835.6	18625.8	14352.7	13259.2	14882.9	13972.3	12543.8	14531.4	16061.3	1	1.12246	1.05378	0.946047	1.09595	1.21134	0	0.579445	0.254478	-0.255296	0.454014
P62312	LSM6	U6 snRNA-associated Sm-like protein LSm6	267851	247398	272717	238798	245830	248046	243261	270460	249719	279045	248426	264122	255807	234662	269446	251575	254400	230887	242344	254643	274357	270922	254844	283937	278245	274162	290377	270829	319778	274838	254519	258106	254493	246770	272461	285997	1	1.01409	0.999898	0.969554	1.07049	1.12368	0	0.113966	-0.000828357	-0.246171	0.569994
P51812	RPS6KA3	Ribosomal protein S6 kinase alpha-3	19599.9	20181.4	19366	20757.5	24244.7	28399	26174	22119	26396.2	27977.5	26424.6	25168.9	26612.8	29964.6	22682.1	21707.6	25099.1	28582.9	24867.6	27392.7	22961.4	27424.3	24295.2	24179.6	25353.9	26270.8	21949.4	25322.4	23267.2	30270.1	20829.9	26213.1	26170.6	25530	24842.9	25416	1	1.25844	1.2564	1.22564	1.19266	1.22017	0	1.17383	1.16455	1.02486	0.875042
Q9H869	YY1AP1	YY1-associated protein 1	851.843	1848.93	909.135	337.086	735.69	1386.02	1972.4	2810.05	2065.02	2157.31	1625.77	1887.06	1894.66	2107.99	2275.46	2073.49	1311.3	1837.69	814.847	1739.27	2596.31	1935.05	1764.59	2310.06	2184.64	1392.03	2083.59	1930.81	2314.15	1468.37	936.538	2078.16	1958.19	1555.32	2158.13	1837.79	1	2.21898	2.09088	1.66071	2.30437	1.96232	0	1.26671	1.13359	0.686581	1.35544
Q68DK7	MSL1	Male-specific lethal 1 homolog	8490.98	7491.34	7584.61	6508.68	6917.03	8008.6	6184.28	7044.06	7290.13	9595.99	7632.45	7435.1	8489.16	7980.34	7137.87	8582.42	8542.18	7200.16	7424.96	8645.89	12143.4	7151.98	7999.41	8196.8	8554.29	9711.83	9254.1	8301.32	8121.2	9924.94	7398.53	7624.61	7734.98	8079.12	8809.17	9062.68	1	1.03056	1.04548	1.09199	1.19067	1.22493	0	0.135856	0.20218	0.408974	0.847665
P48634	PRRC2A	Protein PRRC2A	85218.3	84155.2	83810.1	76653.2	74598.7	90524.8	76412.2	92379.1	81347.5	92376.8	78126.4	86080.6	80358.1	81315.8	93030.3	77807.9	84740.3	73124.1	74362.7	82826	90000.9	84729.4	79712.8	93285.8	88515	85118.7	89517.6	89563.2	95643.9	89131.9	80887.1	86608.1	83782.2	78572.2	87248.8	89795	1	1.07073	1.03579	0.971381	1.07865	1.11013	0	0.642233	0.325004	-0.25987	0.714155
Q9H5H4	ZNF768	Zinc finger protein 768	12499.9	10791.7	10396.3	10037.8	13191.5	13475	11989.8	11851.3	14599.9	16158.1	10813.6	12729.6	12106.9	12271.2	14110.7	13542.6	11647.5	13243.6	13565.3	12768.2	13678.9	13507.4	13429	13371.4	13586.4	12979.8	15059.4	12651.6	15146.4	13490	11383.4	13614.8	12406.4	12953.4	13514.6	13865.5	1	1.19602	1.08986	1.13792	1.18722	1.21804	0	0.899016	0.412148	0.632539	0.858647
P55081	MFAP1	Microfibrillar-associated protein 1	37228.9	36486.4	37668.5	35191.5	31267.4	41456	35422.4	48546	37629.7	45136.9	33596.1	39832.3	37272.3	38952.2	41994.5	37702.3	35399.9	33238.1	33039.2	39195.1	43167.5	40476.5	36662.8	47419.9	39090.2	37213.2	45304.3	40019	49300.1	39944.5	35568.5	41638.2	38329.5	35714.9	41363.4	42356.2	1	1.17065	1.07762	1.00412	1.16292	1.19083	0	0.894217	0.406755	0.0215673	0.853726
P63173	RPL38	Large ribosomal subunit protein eL38	81149.1	59769.1	48039.8	77747	80114.5	80893.8	83560.4	78794	85908.9	84367.1	87807	81880.1	80332.8	83207	82907.9	91489.4	91173.5	83523.2	54042.2	60074.1	62356.5	57336.5	79329.6	67333.6	81406.2	88349.4	88792.6	88417	86756.2	93657.2	69363.9	82704.8	83226.9	76060.5	69552.5	89194.5	1	1.19233	1.19986	1.09654	1.00272	1.28589	0	0.672746	0.699074	0.33769	0.00950849
P61313	RPL15	Large ribosomal subunit protein eL15	107111	109809	108126	122195	139740	146540	139966	127976	135052	152910	135199	130295	134924	147155	139001	125167	126310	158373	127692	148471	129546	128766	130488	132098	143127	140480	128088	135220	131354	156533	117396	140489	137315	137203	132805	138335	1	1.19671	1.16967	1.16871	1.13126	1.17836	0	1.10286	0.951254	0.945907	0.735897
O00748	CES2	Cocaine esterase	23804.9	21682.8	22719.9	20539.3	20729.7	25852.1	23959.7	22623.5	23610.5	22358.4	21178.5	24244.7	23910.3	22257.5	16338.3	22697.9	22320.1	22506	21972.1	22683.2	22581.2	23980	22962.3	23541.3	21182.9	23411.1	25652.9	24778.9	26514.3	23949.1	21895.3	23680.8	21585.9	22435.9	22849.5	24861.3	1	1.08155	0.985867	1.02469	1.04358	1.13546	0	0.60201	-0.104336	0.18225	0.321719
O95858	TSPAN15	Tetraspanin-15	2737.45	2799.5	2683.79	1723.88	4638.84	3931.45	5590.04	5209.13	4324.24	5325.81	5124.8	3663.77	3810.93	5346.82	6170.79	4612.32	4956.79	4899.58	3879.93	5326.22	3634.54	3500.98	4926.35	4145.23	5158.73	4334.84	4424.29	4430.86	3841.4	4712.68	2916.69	4876.13	4823.42	4734.97	4273.17	4348.81	1	1.6718	1.65373	1.6234	1.46507	1.49101	0	1.36821	1.3314	1.26964	0.947178
Q8NC60	NOA1	Nitric oxide-associated protein 1	1523.44	7053.7	2447.93	1887.96	9848.33	15063.7	12825.3	10415.6	7729.94	12996.6	13904.4	7310.4	8278.63	15642.6	8786.76	10113.6	9937.97	14814.8	2612.58	6406.05	6299.41	9193.53	9599.9	9474.01	5511.69	5940.01	9343.92	11385.3	11542.1	9755.4	4552.27	11806.2	10784.6	8777.01	8015.71	9593.34	1	2.59348	2.36905	1.92805	1.76081	2.10737	0	1.43897	1.2363	0.838065	0.687044
Q9H0Z9	RBM38	RNA-binding protein 38	21383.9	19048.6	21159	19640.5	16738.1	16623.5	15430.7	16397.1	17034.6	17406.1	16851.1	19409.7	14518.1	15569.7	16105.6	19219.7	17869.8	18147.2	14478.9	20175	16987.4	17314.1	14975.7	18159.9	14111.4	16512.9	17439.2	15329.5	17140	16925.4	19594	16578.4	16490.8	17978.1	16309.7	16669.4	1	0.846094	0.841626	0.91753	0.832381	0.850739	1	-0.031117	-0.0610521	0.447478	-0.122988
Q8ND04	SMG8	Nonsense-mediated mRNA decay factor SMG8	27335.8	42704	30681.6	30772.8	48749.1	50696.6	50512.6	50893.5	49028	51494	46785.3	47840.8	49092.5	56345.2	46356.4	48785.7	50225.4	55726.8	36715.3	41540.4	43574.5	51402.5	50406.4	47383.1	50046.1	46517.4	44416.4	49144.3	45820.6	50102.3	36048.7	50524.9	49284	46598.7	48562.5	47200.2	1	1.40158	1.36715	1.29266	1.34714	1.30935	0	1.29814	1.18687	0.94606	1.12216
Q15233	NONO	Non-POU domain-containing octamer-binding protein	312711	338493	338008	333853	390895	381322	388044	386721	402004	438515	359435	357552	371383	385734	382762	364090	362528	397497	383281	387610	362810	381181	363561	365682	387820	375648	359679	384286	401100	423289	342792	399321	371373	379001	372211	388801	1	1.16491	1.08338	1.10563	1.08582	1.13422	0	1.22866	0.621211	0.78701	0.639421
Q02790	FKBP4	Peptidyl-prolyl cis-trans isomerase FKBP4	1.48202e+06	1.45704e+06	1.45723e+06	1.49702e+06	1522449	1.68449e+06	1.61652e+06	1.71556e+06	1.63241e+06	1.69551e+06	1.50637e+06	1.56887e+06	1.51091e+06	1.61021e+06	1.6868e+06	1.45434e+06	1.54544e+06	1.54854e+06	1.47556e+06	1.60313e+06	1580920	1.64075e+06	1.50545e+06	1.6708e+06	1.50555e+06	1.58633e+06	1.51687e+06	1.57769e+06	1629572	1.59959e+06	1.48315e+06	1.6689e+06	1.57663e+06	1.5254e+06	1.5807e+06	1.58201e+06	1	1.12524	1.06303	1.02849	1.06577	1.06665	0	1.87893	0.945617	0.427374	0.986712
Q8TAE8	GADD45GIP1	Large ribosomal subunit protein mL64	34703.6	32306.1	31066	32239.1	29853.4	30561.1	31011.8	29881.4	31026.8	31081.6	33567.4	31823.2	30958.7	32824	29798	27754.8	30796.5	32720.3	35527.7	37592.4	32389.5	30536.1	30218.4	34211.8	33524.9	30022.1	25528.4	26410.8	26474.5	30882.3	32033.7	30712.6	31794.3	32878.3	32176.1	27863.6	1	0.958759	0.992527	1.02637	1.00445	0.869823	1	0.683196	0.942592	1.20256	1.03417
Q5VT25	CDC42BPA	Serine/threonine-protein kinase MRCK alpha	6936.61	8735.5	7455.71	7215.88	7434.56	8160.84	8191.67	8392.34	7389.26	10065.6	7760.25	7431.35	8401.57	6791.2	8103.81	6274.14	6059.44	9101.54	6170.38	6877.89	8034.74	7331.09	8607.48	7967.59	7151.23	9802.58	9359.47	8066.21	8694.8	9620.11	7555.65	8439.94	7697.64	6896.68	7818.43	9108.63	1	1.11704	1.01879	0.912784	1.03478	1.20554	0	0.569411	0.0914269	-0.424329	0.169206
Q9P225	DNAH2	Dynein axonemal heavy chain 2	5091.36	4091.67	6554.86	5465.21	4503.43	4982.91	3228.4	3132.4	2992.96	3296.26	4787.61	3993.33	3981.3	5311.94	4028.25	3718.53	7353.03	5046.68	7211.23	4446.15	6734.59	4141.19	6257.29	7361.33	6320.62	2353.61	4091.57	3690.26	3431.1	4217.34	5141.31	3526.58	4420.49	5555.13	6163	3556.77	1	0.685932	0.859798	1.08049	1.19872	0.691804	1	-0.019053	0.545089	1.26116	1.64479
Q96ST3	SIN3A	Paired amphipathic helix protein Sin3a	75402.6	77326.4	70877.4	74441.2	68095.5	77865.2	72228.1	84685.9	76947.8	85716.6	73995.2	78334.1	74828.6	71524.1	77879.6	70368	70878.4	68304.5	70560.2	74586.1	75675.9	74147.4	70952.1	79590.7	80381.3	76858.4	85168.7	77959.3	85871.9	80089.9	73228.6	79488.7	75312.3	70939.4	76149.5	81189.6	1	1.08549	1.02845	0.968739	1.03989	1.10871	0	0.786347	0.261739	-0.287553	0.366893
Q13330	MTA1	Metastasis-associated protein MTA1	13528.7	13146.7	16589.4	17000.9	16572.6	13891.5	16115.7	13799.1	13995.9	12523.4	14736.9	11618.7	12671	15103.4	12610.6	13808.7	14524.7	14934	15181.6	16937	14652.2	18173.5	14853	17358	16689.3	14279.1	10933.4	13929.7	10653.8	9804.89	15367.7	14065.1	13348.1	15077.2	16345.2	11920.2	1	0.91524	0.868584	0.981098	1.06361	0.775664	1	0.622173	0.4142	0.915741	1.28354
P15309	ACP3	Prostatic acid phosphatase	33011.5	33030.1	35520.2	35988.5	40114.5	40497.3	40523	39789	41644.4	42673.5	32556.1	36074.8	36999.7	43497.7	38338.1	38761.8	34425.2	41714.1	36817.8	42828.7	34052.4	43327.6	28352.9	38312.4	40414.5	41155.8	38040.6	38196.7	42256.9	44938	35533	41025.5	37493.3	38909.5	36892	40917.6	1	1.15457	1.05517	1.09503	1.03825	1.15154	0	1.02003	0.364058	0.627075	0.252384
Q9UBC2	EPS15L1	Epidermal growth factor receptor substrate 15-like 1	101735	125521	91572.2	111272	99403.1	122219	128772	136941	119020	140781	110321	124824	115809	125249	140619	116864	117801	104501	116636	128972	132937	124740	130030	126432	121380	120523	136540	112985	149284	122022	105900	129547	123364	116955	127104	128271	1	1.22329	1.16491	1.10438	1.20022	1.21124	0	1.05703	0.780675	0.494146	0.947829
Q9HAS0	C17orf75	Protein Njmu-R1	52528.8	51872.6	47086.8	49027	48604.8	49585.3	45754.3	45760.9	52074	44030.8	49306.6	52266.1	52229.7	39560.8	49857.3	54606.7	55356.4	52840.8	47971.9	42022.1	58143	55174	55367.8	42446.3	50013.7	54002.9	51792.9	54989.2	56992.1	56807.1	49824	47441	48644.1	50559.6	52229	54916.8	1	0.952172	0.976318	1.01476	1.04827	1.10222	0	-0.467908	-0.231683	0.144436	0.472225
Q04941	PLP2	Proteolipid protein 2	14696.6	19194.5	15887.2	21107.5	18733.9	25288.1	25837.1	22874.7	20970.4	25200.6	22517.5	16468.6	20192.5	25766.8	25321.7	21203	23003.8	26586.3	18228.1	26644	19382.2	20379.9	17880.1	19561.9	25569.7	23923.9	19683.2	24423.1	20050.8	23243.6	17924	24034.2	22053.4	23133	20554.7	22264.9	1	1.3409	1.23039	1.29062	1.14678	1.24219	0	1.40758	0.951279	1.19998	0.60604
O95825	CRYZL1	Quinone oxidoreductase-like protein 1	61430	94648.4	56774.4	66401	109991	115791	101802	113074	110068	115181	89796.7	99132.2	113143	102045	115426	80126.3	100772	96379.2	45980.4	64322.7	58484.7	59425.7	108574	84470.4	93439.1	109711	92678.7	119333	128492	95416.5	77848.9	111183	103909	77516.1	80878.7	109126	1	1.42819	1.33475	0.995725	1.03892	1.40177	0	1.06577	0.833183	-0.0106402	0.0968693
P12081	HARS1	Histidine--tRNA ligase, cytoplasmic	267893	256022	270319	254064	267277	266350	262891	276330	278623	261510	258220	274274	280171	259144	278263	273965	298529	267172	266417	266318	258246	264118	267959	278032	272640	280602	280046	271234	296478	285862	263115	269141	270014	274480	268199	282845	1	1.0229	1.02622	1.04319	1.01932	1.07498	0	0.305408	0.349682	0.576045	0.257693
Q7L576	CYFIP1	Cytoplasmic FMR1-interacting protein 1	152349	152169	149775	137356	147392	145803	138805	144400	144534	133402	153024	153005	152561	151809	134028	148048	158766	151276	142256	144599	160511	156496	147210	151566	152161	138132	136352	139704	137188	129136	147808	141389	148885	148989	153589	136102	1	0.956568	1.00729	1.00799	1.03911	0.920804	1	0.451587	1.092	1.10087	1.49383
Q92522	H1-10	Histone H1.10	70333.4	79760.8	68517.4	77469.7	83590.6	80876.1	91355.8	83533.3	83535.5	87352	87225.3	86365.5	84030.3	97266.5	83542.1	85891.9	88584.7	106842	93822.6	99364.4	78400	88070.4	84357.8	81176.9	91402	91534.2	84776.9	87740	78003.4	96929.8	75934.4	85330.5	87685.9	94901.1	84681.4	87796.9	1	1.12374	1.15476	1.24978	1.11519	1.15622	0	0.792091	0.99065	1.59889	0.737372
Q15046	KARS1	Lysine--tRNA ligase	103028	97980.1	100383	104615	109887	114415	116287	118635	115900	120548	114343	109864	110183	124950	117855	102241	113384	128293	106765	127767	107424	106363	104787	114512	118850	117566	111298	106864	110726	121374	103178	117157	115439	115690	110387	113566	1	1.13548	1.11883	1.12126	1.06987	1.10067	0	1.34576	1.18036	1.20454	0.693997
P11310	ACADM	Medium-chain specific acyl-CoA dehydrogenase, mitochondrial	122383	123149	122748	122157	132439	130405	130470	132885	138580	132881	130618	125444	129660	144835	126586	126106	143488	153417	138348	147225	129711	136341	132399	140074	135434	143815	125848	130404	148667	152919	124575	133044	131429	141717	134792	140330	1	1.06798	1.05501	1.1376	1.08201	1.12647	0	0.53752	0.43499	1.08799	0.648454
Q00577	PURA	Transcriptional activator protein Pur-alpha	62163.3	56196.2	77521.5	55023.2	73249.6	70531.5	68373.8	72123.3	73918.7	90109.6	84391.3	75271.6	71345.5	80235.5	72965.8	60068.3	79812.7	61464.6	76557.9	81539.6	85210.2	78064.2	58915.8	77926.9	76154.4	80608.5	69622.2	79202.8	79071.4	84043.8	64830.8	75011.4	76841.9	71888.6	75254.3	78509.8	1	1.15703	1.18527	1.10887	1.16078	1.211	0	0.744252	0.878074	0.515964	0.762011
P20618	PSMB1	Proteasome subunit beta type-1	1.67917e+06	1.599e+06	1.66987e+06	1.51894e+06	1.54782e+06	1.52689e+06	1.43546e+06	1.68298e+06	1.51912e+06	1.68128e+06	1.54316e+06	1.62631e+06	1.5912e+06	1.47602e+06	1.69853e+06	1.60616e+06	1.5914e+06	1.48037e+06	1.58795e+06	1.61449e+06	1.66978e+06	1.66464e+06	1.59252e+06	1.75787e+06	1.53309e+06	1.67027e+06	1757002	1.71141e+06	1.98354e+06	1.77027e+06	1.60296e+06	1.56914e+06	1.58704e+06	1.57607e+06	1.64358e+06	1.7785e+06	1	0.978903	0.990069	0.983225	1.02534	1.10951	0	-0.192657	-0.0906925	-0.153185	0.231388
Q15834	CCDC85B	Coiled-coil domain-containing protein 85B	2346.34	4870.22	3986.49	3777.18	3391.24	4766.33	4092.34	5599.59	4214.17	3725.33	5433.36	5534.95	5405.9	2787.94	3666.03	6213.37	6304.04	5462.62	4290.11	5740.4	5307.85	4293.35	6240.45	5205.41	3673.73	4731.5	5914.12	4906.29	4825.82	5282.61	3674.3	4479.55	4565.64	5602.11	4944.16	5132.07	1	1.21916	1.24259	1.52468	1.34561	1.39675	0	0.552388	0.61144	1.32244	0.871097
Q8IZ83	ALDH16A1	Aldehyde dehydrogenase family 16 member A1	160904	150356	157999	145898	142986	150780	141654	159380	141617	167636	142538	153479	151902	151087	165890	149214	150999	142162	155734	165604	175091	161620	151763	178448	163541	164521	163840	162137	185229	163102	151628	152213	152979	152743	166093	167766	1	1.00386	1.00891	1.00735	1.09539	1.10643	0	0.0362433	0.0836979	0.0690457	0.896331
P14209	CD99	CD99 antigen	2026.65	418.077	941.601	2529.14	935.565	796.973	851.414	1088.63	366.503	676.087	413.498	463.496	416.496	941.177	414.165	505.541	1103.34	651.482	1243.99	436.608	146.194	734.904	364.641	798.172	964.47	425.245	516.039	418.865	567.171	414.737	1370.21	755.922	529.766	788.192	601.676	468.411	1	0.551684	0.386632	0.575236	0.439113	0.341854	1	0.31882	0.0680364	0.354604	0.147777
Q9UNF1	MAGED2	Melanoma-associated antigen D2	147740	146862	141294	132398	145372	162312	162336	163668	159794	177944	145064	149494	143048	156525	165936	146714	144144	152542	149418	163338	158762	150206	148317	164092	169063	146637	156482	154769	168035	156986	142733	165211	152013	151231	158088	156582	1	1.15748	1.06502	1.05954	1.10758	1.09703	0	1.62308	0.670112	0.613641	1.10875
P02545	LMNA	Prelamin-A/C	666533	659088	674014	638162	590751	726102	648590	753793	681978	743027	596411	654529	642336	628489	787257	654753	623690	603385	604853	667807	695401	680223	647268	743836	712957	704308	729469	676162	809486	689868	645710	710698	661804	630898	695937	721859	1	1.10065	1.02493	0.977061	1.07779	1.11793	0	0.853436	0.211357	-0.194515	0.659593
P15529	CD46	Membrane cofactor protein	30701	30560.8	32355.6	30964.2	32155.4	35278.5	33226.2	33887.4	31449.8	32891.9	34699.5	29387.1	30832.5	28595.5	37290.3	30596.5	29057	27332.7	30971.1	34737.3	33856.3	29674.7	35316	37519.6	35267.8	35282.6	34724.5	33847.1	36516.7	32465.5	31347.4	33346.8	32161	30538.9	34326.9	34567.3	1	1.06378	1.02595	0.974208	1.09505	1.10271	0	0.62094	0.252668	-0.251099	0.925342
Q16630	CPSF6	Cleavage and polyadenylation specificity factor subunit 6	129541	128217	125133	130852	139357	143062	143895	149768	160980	157265	128953	144087	134937	153777	166465	129010	132053	144412	136489	153446	131687	141102	127197	151775	136723	143592	137006	138097	144230	142021	130620	150994	145644	139082	137697	140989	1	1.15598	1.11502	1.06478	1.05418	1.07938	0	1.96489	1.44891	0.816081	0.682494
Q9NPI6	DCP1A	mRNA-decapping enzyme 1A	8218.4	6294.95	7440.58	7038.65	7416.91	8905.88	7480.74	8668.73	9679.88	9053.56	8731.03	9749.91	8850.81	9433.77	8900.19	9335.67	10032.6	10823.8	6420.77	7715.02	8659.41	8080.39	9671.14	7684.25	7948.36	8528.06	8695.65	7744.15	9700.04	9984.34	7281.9	8757.76	9133.14	8865.58	8408.71	8930.45	1	1.20268	1.25423	1.21748	1.15474	1.22639	0	0.895248	1.12295	0.96065	0.683518
Q14152	EIF3A	Eukaryotic translation initiation factor 3 subunit A	78558.3	159482	133963	98971.1	170691	189646	180290	192180	185146	203987	142637	173143	161456	185302	181129	141045	129732	152269	147322	174051	170760	177235	169263	182704	191296	161985	174382	182616	192598	184613	128333	190250	168734	148884	178251	179239	1	1.48247	1.31481	1.16014	1.38898	1.39667	0	1.2163	0.793634	0.403699	0.980601
Q9BZE4	GTPBP4	GTP-binding protein 4	4703.79	3427.14	4001.42	3499.5	3974.56	4581.92	5778.03	4823.88	5391.68	4364.05	4739.1	3991.84	4986.78	4123.63	4210.03	6111.16	5155.39	7778.18	4468.12	4867.85	2603.94	4157.29	4424.68	3184.72	5760.74	5576.29	5739.95	4291.77	4421.54	6993.31	3921.28	4987.91	4410.28	5676.14	4026.27	5404.57	1	1.27201	1.1247	1.44752	1.02678	1.37827	0	0.7191	0.32967	1.18309	0.0707838
Q6XZF7	DNMBP	Dynamin-binding protein	3022.75	2257.84	2287.71	2568.49	2216.7	1908.32	2312.33	2524.84	1514.2	2101.31	1584.4	2231.31	1660.14	2075.24	2158.32	2028.95	2133.34	2336.03	2423.73	1734.77	2243.43	1901.69	1716.6	1884.86	1348.53	2134.19	917.716	877.567	1213.49	2315.81	2470.7	2072.2	1941.88	2131.36	1819.02	1491.76	1	0.838711	0.785964	0.862657	0.736238	0.603779	1	0.59293	0.459806	0.653367	0.334306
O00287	RFXAP	Regulatory factor X-associated protein	1666.82	1739.16	1303.49	1230.08	1427.63	1152.86	1161.32	1546.54	1702.24	1682.63	760.968	1139.59	1184.95	804.022	1409.31	1514.61	978.768	1077.39	763.056	1024.14	1486.6	637.972	997.312	1236.82	1018.66	1016.55	1085.03	953.404	1157.94	670.105	1473.44	1449.12	1059.77	1071.59	1075.47	976.605	1	0.983492	0.719248	0.727273	0.729906	0.662807	1	0.951044	0.167387	0.191186	0.198995
O43150	ASAP2	Arf-GAP with SH3 domain, ANK repeat and PH domain-containing protein 2	18097.7	18929.9	16664.7	13583.4	17997.7	19510.4	18460.7	21825.6	19016.4	19149.3	16521.6	19558.7	21209.3	20465.2	21826.4	19637.8	20228.9	19911.6	16052.2	13954.8	19510.5	20705.8	17885.1	20074.1	20780.2	21378.4	18323.5	21452.7	23193.8	19474.7	17054.7	19592.5	19916.3	17957	19791.1	20764.6	1	1.14881	1.16779	1.05291	1.16045	1.21753	0	0.684055	0.771327	0.243231	0.737599
O95147	DUSP14	Dual specificity protein phosphatase 14	6194.26	5796.2	5432.33	5677.27	5607.61	6151.95	6404.06	5311.84	5165.36	5933.39	6299.8	5051.84	5407.91	5788.09	4472.1	4333.17	5621.42	6464.45	5067.53	5261.02	6365.2	4655.2	5684.47	3227.78	4780.83	4862.32	3891.86	5774.15	3026.27	3783.96	5741.53	5793.32	5403.95	5349.52	4942.7	4267.71	1	1.00902	0.941203	0.931723	0.860867	0.743305	1	1.03514	0.770946	0.734016	0.457982
O15111	CHUK	Inhibitor of nuclear factor kappa-B kinase subunit alpha	78319.4	67161.1	78892.3	66217.9	78810	63399.9	70205.5	31482.4	61123.4	68547.2	75663.2	60261	69276.9	81010.6	59750.7	54917.5	58677.6	62525.8	53189.9	77492.9	55151.1	52459.9	48926.4	64057.5	72539	59375.6	47522.9	59123.8	77501.9	50693.6	73880.1	58951.7	69192.5	61360.8	58626.8	58843.6	1	0.797937	0.936551	0.830545	0.793539	0.796473	1	0.00719147	0.68825	0.167405	-0.014417
O95361	TRIM16	Tripartite motif-containing protein 16	11615.4	14114.6	11152.5	10408	13267.9	11512.8	13074.8	12315.5	12488.5	14495.2	11966.8	13069.7	13359.2	15651.5	16319.3	17489	14705.6	14578.9	62198.6	15392.6	13694.9	13684.4	12642.4	15606.7	54976.5	13198.3	14949.8	15545.6	13749	15853.9	12111.7	12777.3	14073.3	24872.9	22121	14659.3	1	1.05496	1.16196	2.05363	1.82642	1.21035	0	0.261286	0.769983	5.00905	3.92885
P20962	PTMS	Parathymosin	409111	425437	441298	354544	375581	430456	392407	466777	412714	467832	356455	391654	389147	361341	474998	388424	356239	340329	398784	398586	401532	409068	389343	451183	397845	449017	454307	445278	527999	431239	401194	434037	394719	376472	409794	461568	1	1.08186	0.98386	0.93838	1.02144	1.15048	0	0.543998	-0.107254	-0.40948	0.142447
Q27J81	INF2	Inverted formin-2	95564.1	92617	98271	92863.7	98673.5	108407	102391	106766	101528	110282	88033.8	91356.8	92007.1	101011	106887	94672.2	86457.2	100223	91840	103162	107280	98699.5	92573.4	97006.9	101834	87956.2	91042.5	90663.1	88418.9	85927.5	95597.8	105875	95859.2	95270.9	99478.8	88801.6	1	1.1075	1.00273	0.996581	1.0406	0.928908	1	2.51214	1.03845	0.9519	1.57105
Q14689	DIP2A	Disco-interacting protein 2 homolog A	18387.5	21260.3	22562	17012.8	21619.6	21688.5	19961.3	17497.1	22592.6	25359.4	20292.8	25202.9	20905.2	23934.8	22041.5	22639	23395.5	22004.3	23389.2	28645.7	23161.1	23762.4	21948.4	26732.7	20842.3	23050	25967.9	22545.6	24475	23041.1	20168.4	21419.8	22475.4	24014.7	23289.4	23815.9	1	1.06204	1.11439	1.19071	1.15474	1.18085	0	0.343067	0.632487	1.05451	0.855644
P53634	CTSC	Dipeptidyl peptidase 1	45933.6	41591.2	42501.2	38993.3	41377	39322.9	37743.7	40268.5	37947.8	40680.4	41706.4	43889.7	36107.8	41319.1	42528.5	44360.9	44826.7	40664.1	39595.2	39909.8	43936.5	42796.1	44048.7	45008.4	38508.7	44847	45737.9	46888.8	51400.5	46424.6	42079.3	39192.7	41110.3	41871.4	42859.7	47059.8	1	0.931401	0.976973	0.99506	1.01855	1.11836	0	-0.579578	-0.194553	-0.0417388	0.156694
O76041	NEBL	Nebulette	16492.1	19315.9	19765.9	17081.1	20893.7	22699.3	23383.5	21939.2	20326.8	22587.4	18986.8	21870.7	19076.1	21160.9	22259	20936.6	18305.9	21051.5	16773.4	19859.4	20714.1	20646.6	16921.8	22640.3	20689.6	20025.8	21134.2	22789	24322.2	21737.1	18709.7	22187.2	20670.7	19385.4	20322.5	22001.7	1	1.18587	1.10481	1.03611	1.0862	1.17595	0	1.05637	0.595687	0.205241	0.489912
Q9UPY3	DICER1	Endoribonuclease Dicer	43117.9	41772	42052.4	38904.8	28032.4	135565	148527	40082.1	48391.9	124053	32624.3	139277	38977.1	139422	142597	37680.6	35939.9	25908.1	48185	162187	51337	143741	43276.9	146676	143538	34723.8	136200	141949	147664	45008.9	38775.9	99323.8	98579.3	61980.2	105714	101109	1	2.56148	2.54228	1.59842	2.72628	2.60753	0	0.971358	0.959414	0.372261	1.07387
Q14232	EIF2B1	Translation initiation factor eIF2B subunit alpha	117549	130859	140374	114058	134372	141893	81748	149448	130490	132840	133622	146101	137890	130414	138188	135028	138569	118497	124732	124050	152496	140198	139557	154244	136800	134119	143761	146385	151219	142831	127443	127284	137243	128175	144659	143663	1	0.998755	1.0769	1.00575	1.13509	1.12728	0	-0.00978074	0.604203	0.0451668	1.06141
Q9UGP4	LIMD1	LIM domain-containing protein 1	27680.8	27984	29187	27267.5	30465.7	31752.1	29480.4	32418.7	30690.3	34225.4	27674.4	28689.4	26901.2	27313.6	34897.1	26971.2	26279.3	27333.6	26509.3	31345.3	31083.7	31484.8	28164.1	34928.5	32377.2	31266.5	32335.8	30184.6	34951.4	30908.6	28517	31713.4	29095.1	27687.7	31607.7	31929.4	1	1.11209	1.02027	0.97092	1.10838	1.11966	0	0.936701	0.169423	-0.243023	0.905724
P62851	RPS25	Small ribosomal subunit protein eS25	823084	836399	790781	837284	940207	827998	822902	823947	825467	913355	904414	900047	932137	1.01498e+06	845251	900888	951002	1.026e+06	905558	1.02818e+06	922722	927516	899725	894395	884433	971099	862101	966438	911540	1.04878e+06	845551	842734	919367	962326	905758	951991	1	0.996668	1.0873	1.13811	1.0712	1.12588	0	-0.0264688	0.693492	1.0971	0.565645
Q96K76	USP47	Ubiquitin carboxyl-terminal hydrolase 47	206131	197870	221696	215896	219329	242496	223107	278050	233852	268476	195919	211604	226001	219184	269844	200114	189033	184477	188997	217106	239240	243970	200255	272385	268163	219217	251134	222375	240922	234909	212184	249196	224510	195946	244802	233711	1	1.17443	1.05809	0.923468	1.15372	1.10145	0	1.71934	0.572579	-0.754361	1.51523
Q86V81	ALYREF	THO complex subunit 4	117477	111997	112857	117680	116462	120081	121513	112322	121907	124476	121270	118873	113302	111879	115568	120240	126824	117193	119541	118535	121139	117625	115600	121858	122509	123876	121488	121390	122057	132053	115295	120060	116178	120466	119746	124173	1	1.04133	1.00767	1.04486	1.03861	1.077	0	0.536728	0.099558	0.582554	0.501434
Q6NSI4	RADX	RPA-related protein RADX	684.949	1010.63	886.437	663.019	1256.37	1810.13	1696.56	1621.86	1274.89	1963.59	1048.98	1429.24	1195.68	1662.57	1155.04	778.095	1234.9	1391.29	1369.32	1470.82	849.737	1985.96	1336.46	1313.42	1820.69	1467.71	1210.07	1281.51	1246.6	1986.21	900.281	1673.41	1298.3	1248.88	1461.25	1438.42	1	1.85876	1.44211	1.38722	1.62311	1.59775	0	1.43666	0.739623	0.647794	1.04243
P49321	NASP	Nuclear autoantigenic sperm protein	836559	767020	839415	720740	716361	743835	673869	804397	730015	809514	736463	809898	765141	711624	811006	784249	787514	683792	734244	784306	865098	805488	767014	824355	820494	818506	870184	848818	1.00377e+06	874036	776019	752326	766826	754821	816490	883062	1	0.969468	0.988154	0.972684	1.05215	1.13794	0	-0.221341	-0.085878	-0.198033	0.378079
Q9Y2F5	ICE1	Little elongation complex subunit 1	1921.17	2862.35	2021.16	2108.39	4370.27	3771.58	2808.98	3714.04	3760.84	1519.56	3741.98	2081.33	4853.32	1547.12	3277.12	2866.61	4113.57	3668.27	4359.18	3738.38	3027.81	2118.02	4457.17	3143.59	3618.56	4202.66	5354.52	3231.86	3843.77	3762.24	2656.67	3115	3100.17	3749.2	3273.03	4079.01	1	1.17252	1.16694	1.41124	1.23201	1.53539	0	0.322237	0.311814	0.768124	0.433344
P16083	NQO2	Ribosyldihydronicotinamide dehydrogenase [quinone]	88943	82677.8	85182	75551.2	80114	87986.3	78451.1	87607.2	80037.9	86103.5	76150.3	83282.9	80816.6	75437	90965.4	80662.3	87950.9	72918.6	78609.3	80988.4	84628	86267.7	80022.6	85753.9	82608.5	85045.8	93248.6	91861.6	102615	90858.3	82493.6	84037.2	81330.5	80225.9	83856.2	92725.8	1	1.01871	0.9859	0.972511	1.01652	1.12404	0	0.150855	-0.113676	-0.221624	0.133163
P28070	PSMB4	Proteasome subunit beta type-4	805904	752796	871855	780022	738915	921468	852878	918596	847426	934512	737584	803504	790827	838229	885866	743736	776977	794030	777258	857577	906220	829109	783340	972829	952215	829295	868721	886153	945015	844687	789898	894976	811202	789916	888743	874774	1	1.13303	1.02697	1.00002	1.12514	1.10745	0	1.23802	0.250998	0.000201619	1.16458
Q13247	SRSF6	Serine/arginine-rich splicing factor 6	293707	282006	263378	313243	314690	302765	316598	312793	299707	339322	331462	313206	305979	361270	310481	315953	349913	381855	305107	339356	311301	315608	315892	288533	368396	349116	299805	336813	316950	355492	293405	314237	324479	338437	319946	331635	1	1.071	1.10591	1.15348	1.09046	1.1303	0	0.544911	0.812824	1.17791	0.694244
P62861	FAU	Ubiquitin-like FUBI-ribosomal protein eS30 fusion protein	323816	316461	302195	314744	321323	338556	328284	330625	336638	339790	325632	338265	321357	307905	340801	330009	332513	360440	328930	376029	321935	353306	326636	367152	360942	366834	309151	337163	382539	389370	315708	334779	326792	345584	345994	357012	1	1.06041	1.03511	1.09463	1.09593	1.13083	0	0.46172	0.268358	0.723334	0.733264
P50238	CRIP1	Cysteine-rich protein 1	1.64832e+06	1.56496e+06	1.57817e+06	1.51524e+06	1.53922e+06	1.57461e+06	1.52539e+06	1.68422e+06	1645123	1.75235e+06	1.47843e+06	1609421	1.50611e+06	1.4395e+06	1.80574e+06	1.44945e+06	1.49125e+06	1.35311e+06	1418451	1.54323e+06	1.64812e+06	1.58734e+06	1.55392e+06	1.70111e+06	1.66907e+06	1626013	1774039	1.66701e+06	1.93609e+06	1.66695e+06	1.56918e+06	1.63634e+06	1.56784e+06	1.4511e+06	1.63191e+06	1.73402e+06	1	1.0428	0.999147	0.924749	1.03998	1.10505	0	0.407425	-0.00812412	-0.716345	0.380577
P07919	UQCRH	Cytochrome b-c1 complex subunit 6, mitochondrial	8349.91	6573.8	7571.38	7374.37	5936.11	5631.26	6811.38	5128.45	4774.47	7435.72	6273.71	5677.27	5709.88	5476.79	6487.45	6387.65	4674.88	4322.68	8446.66	6941.92	7240.1	7567.61	5849.6	6990.75	6713.9	5792.16	5938.87	5735.97	5633.16	5963.02	7161.11	5956.26	5925.02	6154.76	6872.39	5812.64	1	0.83175	0.827388	0.859469	0.959682	0.811694	1	0.106507	0.0833411	0.25371	0.785892
Q9NTW7	ZFP64	Zinc finger protein 64	4489.38	5161.04	4939.11	4738.36	5211.32	6376.99	5923.43	6086.95	7135.6	6231.56	5438.98	5689.72	5028.96	6595.99	5475.47	6083.48	5436.27	6517.28	5917.25	6094.51	5998.72	7018.73	6340.61	6978.51	6116.57	5639.2	5360.42	5682.52	6543.54	6794.61	4907.84	6350.91	5645.82	6009.76	6490.63	6004.06	1	1.29403	1.15037	1.22452	1.3225	1.22336	0	1.3164	0.673208	1.0052	1.44386
P56962	STX17	Syntaxin-17	28174	33508.6	30768.3	31066.6	32738.1	30490.8	33334.9	38946.7	34533.4	37746.8	34886.4	36875.7	35418.7	30062.8	35177.5	33239.8	33704.3	30177.1	34590.4	36012.9	37634	34242.2	34525.3	39506.3	36220.8	32359.2	37108.6	34725.8	41715.8	35352	31251.1	35010.5	34484.2	33544.9	36425.7	36252.3	1	1.1203	1.10345	1.0734	1.16558	1.16003	0	0.751704	0.646466	0.45865	1.03468
Q5T9S5	CCDC18	Coiled-coil domain-containing protein 18	21383.7	23028.7	42555.7	32609	34194	41692.1	11987.8	25546.4	20620.4	46353.9	42944	11959.2	44641	42079.2	20829	33476.4	14201.8	39248.4	19732.7	44034.3	46297.2	42611.1	44116.6	35155.9	40979.2	40874.5	42983	35332.4	45469.1	44841	30754.2	29240.1	32490.5	30138.7	41832	41900	1	0.950768	1.05646	0.979987	1.3602	1.36242	0	-0.135844	0.15578	-0.0552215	0.993898
Q9BYG5	PARD6B	Partitioning defective 6 homolog beta	14533.6	14859.9	16045.9	15319.6	14129	14689.4	13407.5	14198.1	14092.5	14503.7	15893.2	15273.6	14798.7	15125	13804.4	13979.6	14685.4	15028.6	15318.1	16504.9	15235.8	15376.8	15148.1	15318.8	16613.4	17010.8	15286.5	17646.9	17573.5	17899.3	14977.6	14178.2	14979	15103.3	15538.6	17083.4	1	0.94663	1.00009	1.00839	1.03745	1.1406	0	-0.37959	0.000651931	0.0597086	0.266393
Q9NUQ8	ABCF3	ATP-binding cassette sub-family F member 3	33049	32000.5	27253.3	26393.2	34799.1	28306.9	34553.9	32280	28437.6	37687.4	36040.2	32910.2	33836	34510.7	33031.4	35338.1	38334.6	40555.1	32686	37536.2	31603.6	35399.8	34703	34034.6	34149.9	35955.5	34397.7	35289.5	35872.9	36604.9	30699	32253.2	34065.7	36890	33978.2	35624.1	1	1.05063	1.10967	1.20167	1.10682	1.16043	0	0.315556	0.68358	1.25703	0.66581
Q4G0J3	LARP7	La-related protein 7	181338	168834	178103	171241	166033	189643	172179	192718	183812	187867	167959	181096	178024	178438	164587	172638	176521	164467	169622	174935	179069	179646	174223	192408	185347	186714	184883	181728	207570	185066	173110	185244	174021	171637	182139	189192	1	1.07009	1.00526	0.99149	1.05216	1.0929	0	0.754487	0.0566405	-0.0915993	0.56141
Q9NTJ4	MAN2C1	Alpha-mannosidase 2C1	1.09347e+06	1.07726e+06	1.21138e+06	1.02535e+06	1.01409e+06	1459980	1.22994e+06	1.42439e+06	1.28309e+06	1.39266e+06	981952	1.16168e+06	1.01717e+06	1126463	1.2994e+06	1.14753e+06	1.11887e+06	1.05397e+06	1.07554e+06	1.22121e+06	1.27103e+06	1.19337e+06	1.18948e+06	1.38448e+06	1.40587e+06	1.13544e+06	1.36839e+06	1.1285e+06	1.45179e+06	1.2411e+06	1.08431e+06	1.35801e+06	1.11733e+06	1123423	1.28884e+06	1.26504e+06	1	1.25242	1.03046	1.03607	1.18863	1.16668	0	1.5144	0.182719	0.216408	1.13169
O43663	PRC1	Protein regulator of cytokinesis 1	1755.8	2063.49	1718.66	2695.35	2037.52	2844.53	2946.29	2728.42	3019.87	3192.78	2843.26	2904.81	3006.68	2933.03	3040.56	3108.26	2609.28	2786.94	2662.86	3659.21	2885.08	2497.67	2225.32	2928	3182.44	3101.21	2728.69	2618	2710.88	2560.92	2054.16	2946.38	2945.67	2965.31	2743.7	2743.94	1	1.43435	1.434	1.44356	1.33568	1.33579	0	1.29349	1.29245	1.32093	0.999655
Q00653	NFKB2	Nuclear factor NF-kappa-B p100 subunit	4856.84	5763.31	6342.27	6275.07	3999.71	7849.73	5041.25	7467.58	6081.95	5741.49	5141.46	6912.78	6720.95	5809.82	5451.5	3380.46	6506.2	3825.95	3962	5940.16	6340.46	6713.19	5603.91	8230.62	6972.02	6541.21	7240.53	7313.94	8063.91	6302.26	5447.44	6436.4	6007.3	4722.95	6772.04	7092.37	1	1.18155	1.10278	0.867004	1.24316	1.30196	0	0.601217	0.340357	-0.440436	0.805263
P10412	H1-4	Histone H1.4	2.03398e+06	1870037	1.8954e+06	1.8093e+06	1.92202e+06	2.03247e+06	1.89614e+06	2087212	1957113	2050373	1.94182e+06	1.98139e+06	1.97939e+06	1.97782e+06	2125662	1.89198e+06	1.90263e+06	1.93919e+06	1.90236e+06	2141794	2.07943e+06	2058912	1.89748e+06	2.16445e+06	1958810	2.0509e+06	2.04148e+06	1.97411e+06	2229829	2.07463e+06	1.90615e+06	2.00466e+06	2.00121e+06	1.95559e+06	2.03181e+06	2.07419e+06	1	1.05168	1.04987	1.02594	1.06593	1.08816	0	0.586249	0.565731	0.294238	0.747828
Q52LW3	ARHGAP29	Rho GTPase-activating protein 29	66593.2	58404.7	25042.3	29454.8	49138.6	89964	56278.4	139498	124894	60719	93429.2	47905	49662.5	65933.6	117248	32870.5	122437	52347.4	147543	128275	89334.4	42311.8	100433	37793.6	119735	53142.7	105008	63616	87973	69840.2	45726.7	94270.5	74835.8	96694.4	77921.6	75916	1	2.06161	1.63659	2.11461	1.70407	1.66021	0	1.60798	0.964218	1.68827	1.06643
Q14137	BOP1	Ribosome biogenesis protein BOP1	23999.5	25955.1	23778.6	24583	27998.9	24416.2	26036.5	27953.3	26334.4	30551.5	26672.1	27463.8	28169.2	27711.9	27369.8	24362.1	25653.5	29138.2	21477	24833.9	24666.3	26528.3	29298.5	25440.5	23558.1	27521.6	27176.1	27342.1	31629.7	33237	25263	27058.4	27477.4	25092.9	25898.3	29381.3	1	1.07107	1.08765	0.993268	1.02515	1.16302	0	0.435951	0.537683	-0.0412958	0.154266
Q96E11	MRRF	Ribosome-recycling factor, mitochondrial	95654.6	94216.3	86109.8	93235.1	86441.3	105177	90240.4	107366	91919.2	104350	98436.3	96773.7	91479.9	101442	89449	94937	105083	101225	92625.6	99189.5	99104.1	102064	99103.4	98421.9	100254	102112	99375.7	92134.1	105329	103377	91131.4	99810.4	95516.3	98612	99789.4	100466	1	1.09524	1.04812	1.08209	1.095	1.10242	0	0.929814	0.469765	0.801421	0.927558
Q96JP5	ZFP91	E3 ubiquitin-protein ligase ZFP91	43409.1	40174.3	43854.9	44209.3	45890.6	55958.4	51000.3	62486	55019.6	63879.8	51966.2	45347.7	47446.5	48972.1	59112.1	43777.7	40985.2	40320	43688.7	47476.2	47558.8	49499	44807.9	53954.9	46976.6	46918.1	55194.4	45891.6	56046.7	46386.3	43507.7	57668.8	50568.9	43249.6	48559.4	50087.4	1	1.32549	1.1623	0.994068	1.11611	1.15123	0	2.15223	1.07318	-0.0392274	0.767771
P04908;P0C0S8;P20671;Q16777;Q6FI13;Q7L7L0;Q93077;Q96KK5;Q99878;Q9BTM1	H2AC4;H2AC11;H2AC7;H2AC20;H2AC18;H2AC25;H2AC6;H2AC12;H2AC14;H2AJ	Histone H2A type 1-B/E;Histone H2A type 1;Histone H2A type 1-D;Histone H2A type 2-C;Histone H2A type 2-A;Histone H2A type 3;Histone H2A type 1-C;Histone H2A type 1-H;Histone H2A type 1-J;Histone H2A.J	505988	516557	482388	519895	599254	579374	564695	552249	586411	617310	610064	554191	583258	649145	577621	566246	603454	707967	591512	640145	547330	603235	581747	552403	628233	615511	548583	604520	560596	691963	524816	580008	594856	621865	582590	604235	1	1.10516	1.13345	1.18492	1.11008	1.15133	0	0.694946	0.881905	1.222	0.727457
Q92542	NCSTN	Nicastrin	57735.6	50292	52234.7	51630.2	46103.2	51388.5	48472.3	52355.4	48671.9	54361	48656.2	49702.7	52575	42962.6	54006.9	51715.4	53418.7	48790.2	46172.6	50698.9	54316.9	51867.1	49417.6	50196.4	49530.8	55894.5	55769.6	56519.3	65770.3	60601.6	51599.1	51049.8	49580.7	50159.2	51065.8	58911.1	1	0.989354	0.960882	0.972093	0.989664	1.14171	0	-0.0751277	-0.276047	-0.196932	-0.0729425
Q9UHN1	POLG2	DNA polymerase subunit gamma-2, mitochondrial	21984.4	19141	21843.2	23170.3	22237	20132.6	15716.1	18862.8	18266.5	22212.8	22281	24769.6	22296.5	23275.9	21911.8	22201.7	15628.2	19792	20096.4	22337.2	16880	24454	22780.7	20094.4	21670.1	24180.7	22472.2	24270.6	28190.5	27385.5	21675.2	19038.2	22907	20011.1	21175.8	25299.9	1	0.878339	1.05683	0.923226	0.976962	1.16723	0	-0.727516	0.339827	-0.459095	-0.137762
P62873	GNB1	Guanine nucleotide-binding protein G(I)/G(S)/G(T) subunit beta-1	22917.8	21915.8	17685.1	23786.4	27148.6	29858.4	30455.9	27670.8	29856.5	29753.6	26356.8	26610.7	27673.7	30333.2	30093.5	22609.5	22789	30270.1	25073.5	29435.7	25220.8	27857	20933.7	27418.8	28794.3	27484.7	28379.9	28202.3	24910.1	27729.3	22690.8	29519	28213.6	26035.6	26044.9	27341.3	1	1.30093	1.2434	1.14741	1.14782	1.20495	0	1.46829	1.18758	0.71924	0.721244
O14910	LIN7A	Protein lin-7 homolog A	42230.3	42348.5	39959.5	40648	36710	44797.5	40533.2	44833.3	42456.7	46056.9	40183.4	41863	38366.4	41362.9	39413.8	37124.1	37650.1	37266.5	36128.3	41083.6	42970.3	41820.9	40057.2	44704.9	44658.2	41995.1	45608.6	44140.6	46687	45354.7	40379.2	43735.5	40237.9	37850.5	42842.3	44757.2	1	1.08312	0.9965	0.937376	1.061	1.10842	0	0.766634	-0.0322857	-0.577601	0.562606
Q13425	SNTB2	Beta-2-syntrophin	24527.7	30884.4	24822.3	22629.8	28918.4	28147.7	26866.5	30978	29156.8	29537.1	30277.4	28806.9	26835.9	27265.2	29607.7	31533.7	33170.5	32164.1	30984.7	25433.4	27617.8	25324.5	31994.8	30163.5	28090.7	30113.3	31023	30373.2	31604.9	30485.8	26356.5	28937.2	28558.6	30657.3	28638.3	30720	1	1.09791	1.08355	1.16318	1.08657	1.16556	0	0.591423	0.50466	0.985619	0.522911
O95163	ELP1	Elongator complex protein 1	34049.2	33493.9	36939.7	38043.1	39110	39818.7	39273.6	40986.9	41251.3	41060.2	39452.3	40649.1	38183.1	37108.6	34716.8	37899.9	40977.2	42734.5	41303.9	42670.6	38027	38784.4	41840.4	42988.5	36751.8	42374.5	38452.2	39602.6	41733.1	40569.6	36327.2	40478.1	38022	41117.2	39678.4	40546.4	1	1.11427	1.04665	1.13186	1.09225	1.11614	0	0.98383	0.401686	1.1353	0.794284
Q8TEU8	WFIKKN2	WAP, Kazal, immunoglobulin, Kunitz and NTR domain-containing protein 2	44852.5	70877.7	53807.7	60593.6	72785.7	69858.4	67852.8	70148.6	72144.5	74395.2	75043.3	67612.7	66291.6	69042	66264.8	86621.4	82214.2	81966.9	55725.9	67965.6	53180.9	64718.1	74361.9	64733	65936.9	75634.4	70298.1	74183.6	74672.3	80772.7	60583.4	70879.9	68850.9	74898.8	64586.2	75112.2	1	1.16995	1.13646	1.23629	1.06607	1.23981	0	0.708692	0.569039	0.98531	0.275503
P42338	PIK3CB	Phosphatidylinositol 4,5-bisphosphate 3-kinase catalytic subunit beta isoform	3821.8	1194.59	2307.55	2457.91	2720.13	963.733	3180.98	1228.81	1908.67	1701.85	3103.55	1578.41	1435.66	2843.58	1286.97	1509.54	1501.69	1560.16	1692.6	1540.21	1301.96	1900.48	1276.98	1325.66	1442.74	1883.9	1191.39	1261.48	1439.48	946.007	2500.4	1796.81	2049.64	1560.84	1449.57	1344.45	1	0.718609	0.819724	0.624237	0.579735	0.537695	1	0.39133	0.610049	0.187196	0.0909347
P15170	GSPT1	Eukaryotic peptide chain release factor GTP-binding subunit ERF3A	407334	389994	370167	396546	378618	432178	390756	441160	426902	427022	385903	406104	412088	404985	426835	381315	347901	380938	384142	389396	399199	374624	394355	419475	394489	398940	416487	413907	450525	424882	388532	423604	407183	376738	396428	420948	1	1.09027	1.048	0.969646	1.02032	1.08343	0	1.08192	0.575366	-0.363816	0.243594
P54920	NAPA	Alpha-soluble NSF attachment protein	106513	110194	101249	100847	98263.9	113274	102668	112689	103870	115240	99766.3	104955	105019	90476.3	113830	101266	103056	97939.1	96218.2	105457	103916	102552	98938.5	107301	102258	106120	115772	109543	123488	115585	103413	109548	102809	100787	102993	114102	1	1.05932	0.99416	0.974605	0.995936	1.10336	0	0.573974	-0.0565014	-0.245698	-0.039324
Q9UK41	VPS28	Vacuolar protein sorting-associated protein 28 homolog	71828.4	63372.6	65078.2	66629.4	60026.1	64226.3	60702.8	63394.2	61019	62255.6	59261.5	61758.2	62136.4	64939.1	59774.8	56843.3	58212.8	59456.1	63709.3	64362	59225.3	59882.1	57250.8	69615.7	64429.6	59176.5	59648.1	59312.8	61100.8	55266	65386.9	62319.6	61574	60516.7	62080.7	58900.8	1	0.953089	0.941687	0.925517	0.949436	0.900804	1	0.527085	0.41214	0.249131	0.490257
P14174	MIF	Macrophage migration inhibitory factor	12972874	11870927	11842702	11354163	11567076	11376657	10766572	11765013	12223516	11807673	11319258	11877351	12153046	10215003	12508107	12576776	12251239	10035975	10964616	11101999	12315736	11747928	11316241	12911000	11495849	12658460	13199604	12710280	14565355	12964070	1.19215e+07	1.15879e+07	11614553	11386121	1.19574e+07	1.32196e+07	1	0.972012	0.974249	0.955087	1.003	1.10888	0	-0.257058	-0.236513	-0.4125	0.0275826
Q66K74	MAP1S	Microtubule-associated protein 1S	13985.4	15596.2	14418.3	13187.6	17425.4	16408.3	18663.5	16009.6	17278.6	17091.2	18572.8	16739.6	17306.8	19954.1	17116	18208.4	18090.3	22129.1	17869.2	18719	16463.8	16998.3	18246.1	17645.4	17780.7	17481.5	16395.2	17617.1	16777.7	19670.5	14922.6	17090.2	17937.9	19003.2	17426.9	17588.4	1	1.14526	1.20206	1.27345	1.16782	1.17864	0	0.813123	1.13109	1.53071	0.9394
Q9H1Z4	WDR13	WD repeat-containing protein 13	90663	85181.8	86004.6	83484.6	77043.9	84407.5	86192.6	86692.7	89699.9	92342.8	86812.9	84378.9	85435.1	74635	92817.4	87893.4	84389.6	83365.3	81755.5	79469.5	85818.3	86373.7	82174.9	92023.9	87071.6	89096.5	93957.5	93246	102308	89967.9	84475.6	87867.1	84815.8	83374.7	86692.5	93715.2	1	1.04015	1.00403	0.986968	1.02624	1.10938	0	0.367064	0.0368284	-0.119151	0.239937
Q8N1G2	CMTR1	Cap-specific mRNA (nucleoside-2'-O-)-methyltransferase 1	30442.9	40425.4	35260.2	28987.5	37247.7	36210.1	42173.8	39885.6	45465.3	47130.2	34426.4	34756.6	40479.5	36344.8	42600.1	32321.3	38442.5	43098.3	34543	47221.7	44459.5	41964.3	36624.2	41126	43195.2	39645.2	39812.2	40753.4	39177.4	43659.2	34472.7	42173	37721.5	39125.3	41473.8	40609.5	1	1.22337	1.09424	1.13497	1.20309	1.17802	0	1.25478	0.529388	0.758155	1.14085
Q8NFA0	USP32	Ubiquitin carboxyl-terminal hydrolase 32	2755.36	3430.66	2883.71	3017.29	3811.95	3383.81	2236.11	1695.16	3920.88	3658.08	2630.12	2445.42	2620.58	3980.41	3039.3	2904.9	3182.35	2791.78	5804.26	3679.16	2413.53	4047.56	3010.31	2505.22	3491.46	2957.84	2153.83	2673.28	1820.46	1557.33	3179.79	2978.81	2943.17	3672.49	3093.62	2232.55	1	0.936793	0.925584	1.15495	0.972898	0.702104	1	0.78782	0.750195	1.52014	0.909023
Q15276	RABEP1	Rab GTPase-binding effector protein 1	60433.4	51782.2	64901.2	50760.8	55626.2	60537.3	54953	59997.8	57259.4	63031.4	59530.9	64742.7	53913.1	51661.9	63966.4	58697.3	62372.5	50650.2	62478.2	60549.5	67533.6	66438.2	61016.6	64524	62089.6	65299.9	65770.9	61677.5	71246.9	61759.6	56700.8	59155.8	58763	58949.5	64320.4	65151	1	1.0433	1.03637	1.03966	1.13438	1.14903	0	0.290524	0.244047	0.266119	0.901712
Q5VZM2	RRAGB	Ras-related GTP-binding protein B	39407.2	41168.9	44500.5	38320.6	44358.6	45716.8	47661.6	45792.7	49393.8	45533.1	46459.7	41784.7	42196.7	43159	52050.9	42554.3	42493.1	40534.2	44203	45657	45772.5	44028.6	48483.2	51142.2	45985.6	45714.1	45934.4	46029.7	51259.6	44262.6	41551.1	46819.6	45130.2	43088.3	47082.4	46640.1	1	1.12679	1.08614	1.03699	1.13312	1.12247	0	1.03527	0.7033	0.30206	1.08692
P12268	IMPDH2	Inosine-5'-monophosphate dehydrogenase 2	244733	252197	255978	251705	258664	258067	248113	251977	258709	267130	258215	266124	267874	254459	256603	268784	272932	276419	254717	267671	261799	267329	260524	264454	263840	274316	254355	270012	273024	281923	252655	256799	260655	268105	263589	270726	1	1.0164	1.03166	1.06115	1.04328	1.07152	0	0.229316	0.442689	0.854929	0.605056
Q96L92	SNX27	Sorting nexin-27	22255.5	17350.9	22936.1	20312.9	24144.9	21994.1	25737.6	28356	25211.3	27333.4	25552.1	25846.5	23995.9	30700.8	25883.3	23862.9	25713.4	31851.5	26333.3	28105.4	25245.4	27656.2	25985.7	25729.1	24349.5	24041	22560.4	28599.8	26206.2	28208.4	21400.1	25726.5	26395.7	27173.3	25793.2	25923.2	1	1.20217	1.23344	1.26978	1.20529	1.21136	0	0.956511	1.10447	1.27639	0.971261
P10619	CTSA	Lysosomal protective protein	223544	313303	414100	217827	429827	391422	396645	467205	457123	423038	359762	389387	360156	422007	377320	328370	425097	365020	438797	479112	433904	398004	349106	483726	458619	435829	413673	419570	491855	429245	319720	427087	381726	407279	424672	438034	1	1.33581	1.19394	1.27386	1.32826	1.37006	0	0.90747	0.524082	0.740056	0.887059
Q2TAZ0	ATG2A	Autophagy-related protein 2 homolog A	18113.1	25501.2	14484.9	14841.5	18229.6	25656.7	22651.7	22116.2	23762.7	24747.5	30187.9	26890.9	26536.8	13062.2	22743.7	23618	26504.6	23933.2	14967.9	14660	15358.3	15255.1	13663	16946.1	11518.5	20832	21325.4	25836.3	24633.8	25660.1	18234.1	23786.9	23884.3	20736.8	14548.2	23657.5	1	1.30453	1.30987	1.13725	0.797858	1.29743	0	1.02386	1.04182	0.461455	-0.679618
Q92466	DDB2	DNA damage-binding protein 2	46635.8	45433.9	39630.1	45034.9	39160.6	45960.4	43861.7	47531.3	44091.6	48861.6	39308	46348.6	46079.6	43249.2	44978.2	46326.7	45340.5	42830.8	41140	43015.2	45028	43402.7	42868.6	44831.2	48171.4	47146.3	48703.9	46188.2	54885	49056.5	43179.1	46061.3	43992.7	43730.6	44860.4	49196	1	1.06675	1.01884	1.01277	1.03894	1.13935	0	0.479026	0.135228	0.0916702	0.279433
O60502	OGA	Protein O-GlcNAcase	112804	108331	116101	100802	100583	102329	104638	103159	106899	100811	106952	104591	107289	95154.2	100793	104460	126853	94457	110515	96269.6	110046	115615	111751	110425	107962	98665.2	100301	96870.5	96533.6	98717.8	107724	103567	102956	106511	111160	98217.5	1	0.961411	0.955735	0.988739	1.03189	0.91175	1	0.562733	0.498421	0.872392	1.36138
P68431	H3C1	Histone H3.1	266344	268665	263492	308990	318874	314869	324254	296845	317668	344529	328435	312468	321384	348348	310880	301961	327457	375277	305089	340384	298527	326785	315329	291578	353375	339075	294552	332033	308740	364069	285273	319633	324303	330034	317119	327694	1	1.12045	1.13682	1.1569	1.11163	1.1487	0	0.809981	0.920068	1.05516	0.750712
P32019	INPP5B	Type II inositol 1,4,5-trisphosphate 5-phosphatase	23315.9	23329.3	18960	17158.9	20338.5	24345.1	22794.8	19852.1	23318.9	22625.6	26287.4	15512.2	23273.6	13773.9	14856.3	23678.1	24284.4	22366.6	24639.5	19355.1	25562.7	25041.6	27952.5	24576.4	22563.7	21726.9	27109.8	24169.5	27648.5	24143	20620.5	22587.3	18740.7	22864.8	25139.4	24959.5	1	1.09538	0.908838	1.10884	1.21915	1.21042	0	0.45328	-0.433231	0.517225	1.04145
P50479	PDLIM4	PDZ and LIM domain protein 4	744.95	1484.18	2275.89	2043.27	1781.52	3274.93	2189.33	2083.7	2666.94	2561.87	3010.44	3602.91	1833.66	1249.52	3929.01	2421.09	1499.68	2595.71	1612.16	1450.3	2022.35	1361.18	1800.7	3611.33	2004.06	2428.99	2557.4	2604.7	3132.1	2540.99	1665.96	2555.35	2725.11	1915.79	2159.92	2652.84	1	1.53386	1.63576	1.14996	1.2965	1.59237	0	0.901221	1.07324	0.253146	0.500532
A1L188	NDUFAF8	NADH dehydrogenase [ubiquinone] 1 alpha subcomplex assembly factor 8	66135	67719.8	66675.6	65318.5	60627.1	81249.7	69517.4	83649.1	70769.8	81638.4	65953.9	74835.1	66125.4	74533.7	81801.1	64000.1	60253.4	63193.9	61233.7	77968.6	72178.1	69131.8	65032	86470.3	85224	71891.7	74740.8	68298.1	80514.6	68101.5	65295.2	77364.9	72649.8	65329.9	75607.2	72709.4	1	1.18485	1.11264	1.00053	1.15793	1.11355	0	1.62793	0.991972	0.00468362	1.39086
P50336	PPOX	Protoporphyrinogen oxidase	32521.2	35107.4	31340.7	36273.8	38564.8	41902.9	44140.2	42517.7	43426.1	45813.1	37179.1	38677.4	37585	39524.2	39537.8	35631.4	38017.3	42545.9	39169.3	44345.9	33667.6	38494.5	36528.5	38180.3	38609.5	37806	37989.6	41009.4	38298.7	47193	34761.6	43560	38500.7	39941.9	37096.1	40459.3	1	1.25311	1.10756	1.14903	1.06716	1.16391	0	1.54419	0.65624	0.909191	0.40972
Q9P2D0	IBTK	Inhibitor of Bruton tyrosine kinase	58912	33157.3	17455.4	26210.5	29538.8	17415.6	9263.36	10095.8	10341.2	13506	11858.8	8742.27	8715.8	31524.3	8541.48	24766.4	33516	22518.5	33431.3	21676.2	19578.8	20977	23436.8	26902	29522.1	8263.64	37962.2	14718.3	11839.8	8541.24	33054.8	12124.4	13876.5	27181.7	24083.3	16265	1	0.366797	0.419804	0.822322	0.728588	0.492063	1	-0.246617	-0.14226	0.650196	0.465658
Q13868	EXOSC2	Exosome complex component RRP4	86354.4	80076.1	83483.8	82101.1	78006.3	81275.8	81918.8	87165.4	85548	86465	79897.1	81189.6	82872.8	73037.8	79321.7	80079	85782.4	74354.8	75637	78888.8	80820.2	77473.3	78668.7	85970	88795	86875.3	86089.5	89757.2	97567.8	88198.4	82004.4	84474.6	79263.8	78948.4	82345.4	89697.6	1	1.03012	0.96658	0.962734	1.00416	1.09382	0	0.32109	-0.35623	-0.397226	0.0443326
Q96HY7	DHTKD1	2-oxoadipate dehydrogenase complex component E1	79596	77837.4	75407.9	87345.8	97416	103493	100614	101463	103121	112263	92675.5	88372.2	91306.5	103157	101916	87180.9	86109.8	105742	89031.9	103977	90434.6	93124.4	88187	91175.4	105250	99033.6	91809.8	92264.7	91046.8	105037	83520.6	104191	95485.5	94408.3	93634.3	95838.5	1	1.24748	1.14326	1.13036	1.12109	1.14748	0	1.67806	0.971344	0.883896	0.821058
Q9H1E3	NUCKS1	Nuclear ubiquitous casein and cyclin-dependent kinase substrate 1	261773	260649	259463	255177	244763	267256	242801	286419	255764	277899	230409	253084	252308	219199	278843	242116	238405	219528	253338	232203	275477	261784	232160	267358	246270	275506	276478	270928	324112	271510	256365	266028	246769	237118	256610	283707	1	1.03769	0.962568	0.924924	1.00096	1.10665	0	0.353405	-0.350971	-0.703926	0.00897026
Q14789	GOLGB1	Golgin subfamily B member 1	86554.7	92007.7	95687.6	74262	84943.1	90117.6	75567.3	101196	94073.9	93300.1	86399.7	89759.8	86068.4	87165.5	93125.1	93696	90492.1	73197.4	83321.8	82669.3	106905	97149.1	98100.5	101766	106904	99744.8	97421.5	92067.8	109336	96563.1	86691	90851.1	88503.7	84675.3	102165	99026.5	1	1.04799	1.02091	0.976748	1.17849	1.14229	0	0.337242	0.146949	-0.163406	1.25441
Q9Y4X5	ARIH1	E3 ubiquitin-protein ligase ARIH1	106890	106317	110125	91229.6	106119	99583.1	94995	108708	102440	112496	92352.7	112343	107017	99334.7	105941	103106	102445	97231.1	100153	107062	116579	108487	103826	115851	104682	108572	119856	116015	133048	113094	104136	103645	103398	101999	109885	118117	1	0.995279	0.992908	0.979479	1.0552	1.13425	0	-0.0351628	-0.0528234	-0.152848	0.411187
P11182	DBT	Lipoamide acyltransferase component of branched-chain alpha-keto acid dehydrogenase complex, mitochondrial	85344.6	78269.2	77008	87921.8	82841.9	91623.5	86374.5	96102.7	87202.9	96705.4	83003.9	80689.4	87972.1	84311.5	93748.9	79554.9	84796.8	84120.8	80785.8	88697.1	82992.8	81913.8	81757.5	88223.4	85158.4	87218.9	84667.4	90727.6	99814	100615	82277.1	91601.8	85945.2	83591.1	84009.2	92608.5	1	1.11333	1.04458	1.01597	1.02105	1.12557	0	0.902556	0.35504	0.127185	0.167655
Q9NRN7	AASDHPPT	L-aminoadipate-semialdehyde dehydrogenase-phosphopantetheinyl transferase	59695.7	56858.4	58087.4	54854.2	52201.8	49056.7	48045.9	53117.5	47540.1	46992.7	51888.1	52205.3	53348.7	47212	52717.4	53641.7	55095.4	50726.5	50676.1	52783	53411.2	53286.6	58184.3	58695.3	50257.6	47689.3	52839.7	52144	53248.8	48956.2	56339.5	48950.6	51474.3	52584.5	54767	50975.6	1	0.86885	0.913645	0.933351	0.972089	0.904793	1	-0.37753	0.0929716	0.299956	0.706836
Q96RQ3	MCCC1	Methylcrotonoyl-CoA carboxylase subunit alpha, mitochondrial	138660	131739	130959	142327	164944	150479	155932	163856	157804	169362	160401	156814	156509	158190	139645	148766	160531	185106	154951	169965	147839	156646	154041	148334	168113	166467	149732	161394	152889	175865	141726	159486	154312	163864	154995	161269	1	1.12532	1.0888	1.1562	1.09362	1.1379	0	0.908779	0.643995	1.13276	0.678939
Q02252	ALDH6A1	Methylmalonate-semialdehyde/malonate-semialdehyde dehydrogenase [acylating], mitochondrial	127936	121785	116164	130310	145336	126053	130712	124055	129229	138254	138643	126964	138129	147107	131169	136020	133353	162077	137476	151837	129352	138063	130820	120768	138293	149560	136904	143267	136756	163434	128306	129661	136402	144153	131459	145984	1	1.01055	1.0631	1.1235	1.02457	1.13778	0	0.0766017	0.457977	0.896385	0.178346
O14975	SLC27A2	Long-chain fatty acid transport protein 2	6876.49	15251.9	16031.3	16530.9	16469	7471.51	6039.18	3816.66	3000.69	12017.4	10197.5	652.376	5191.44	12217.5	4589.56	13780.7	5000.79	17138.9	13796.4	19100.6	17141.5	19570.4	16868.5	13327.3	9626.62	12414.2	4223.65	6641.04	5049.19	10596.2	14231.9	6469.09	6569.68	13763.5	15306.9	7784.85	1	0.454548	0.461616	0.967086	1.07553	0.546999	1	-0.204087	-0.188484	0.927342	1.16674
Q9NZT2	OGFR	Opioid growth factor receptor	44888.9	47855.4	49864.5	43972.2	41446	55513.5	50767.9	56681.6	52366.5	54144.1	47777.7	48100.5	47496.3	48428.2	57934.5	47068.5	46343.9	45989.4	45375.6	50425.6	49703.2	49381.8	45728.4	52845.7	52628.5	48422.6	54182	48878.8	53779.9	50399.8	45605.4	53894.7	49947.4	47040.6	50057.5	51132.6	1	1.18176	1.09521	1.03147	1.09762	1.1212	0	1.49972	0.785573	0.259663	0.805491
O75420	GIGYF1	GRB10-interacting GYF protein 1	3922.88	5770.55	8353.84	4129.51	5881.55	9290.37	7577.66	7278.85	8039.65	8303.69	7321.63	8058.84	6764.7	7927.92	8256.2	7319.06	6898.38	6515.76	8307.06	8634.28	8034.25	6103.51	6907.17	8184.55	8359.27	7800.96	6955.48	7925.55	8396.65	7554.15	5611.66	8098.04	7665.86	7534.91	7517.75	7726.56	1	1.44307	1.36606	1.34272	1.33966	1.37687	0	1.17565	0.9713	0.909382	0.901267
Q12923	PTPN13	Tyrosine-protein phosphatase non-receptor type 13	13492.1	6190.88	6282.12	10821.6	3706.57	2839.32	5038.25	4063.76	4782	2829.75	4867.7	4796.85	4893.24	2657.2	3675.02	5883.63	5132.27	3033.29	5369.49	6885.11	4281.43	5924.4	4180.18	3720.03	3436.68	4999.06	5304.84	2567.5	3673.45	3543.96	8098.65	3910.62	4178	5260.76	4308.54	4017.76	1	0.482873	0.515889	0.649584	0.532008	0.496103	1	-0.0262556	0.0392657	0.304589	0.0712544
Q9Y2X0	MED16	Mediator of RNA polymerase II transcription subunit 16	19128.8	21608.2	26307.8	15439.6	26279.9	26399.6	27464.6	25099.2	25575.8	26028.2	32610.8	24866.9	27641.4	29562.5	24478.2	30973	29012.8	30105.8	33516.4	35948.1	33935.7	30702.3	30996.1	30345.5	28319.2	27943.2	26761.6	29461.1	24653.4	30659.5	21752.9	26113.5	27832	31911.2	30859.7	27895.8	1	1.20046	1.27946	1.46699	1.41865	1.2824	0	0.709862	0.989612	1.65367	1.4825
Q8TDQ7	GNPDA2	Glucosamine-6-phosphate isomerase 2	20299.7	18680.5	16212.4	18200.6	17986.2	20135	17729.7	20743.2	18974.1	18498.1	18231.9	19106.8	19074.9	17985.4	20069.8	19620.1	18805.5	16401.7	17603.5	17528.1	17475.4	17352.6	18967.2	20499.6	18338.1	19126.3	21575.4	20836.1	23976.8	20617.9	18275.9	19216	18893.8	17991.8	18526.6	21226.5	1	1.05144	1.03381	0.984453	1.01372	1.16145	0	0.318631	0.209407	-0.0962958	0.0849637
Q86UU0	BCL9L	B-cell CLL/lymphoma 9-like protein	80824.6	80951.7	86681.8	72603.3	78411.2	78672	70195.7	86571.4	80988.2	77869.2	79146.4	85839.9	80119.1	78145.3	80861.5	84745.7	83821.5	70695.5	80178.5	78369.2	83134.4	78597.8	80259.1	91345.3	76289.8	85476.8	84652.4	88596.1	91722.9	88464.2	79894.5	78859.3	80822.4	79562.1	81925.3	87782.5	1	0.987043	1.01161	0.995839	1.02542	1.09873	0	-0.131241	0.117636	-0.0421433	0.257453
Q96BW5	PTER	Phosphotriesterase-related protein	236804	230377	234648	214583	199625	225435	188742	245815	217091	244001	223517	221014	229764	223187	234683	204854	221878	199247	225901	219523	242640	238650	230932	257003	224436	226210	258730	239333	288072	265020	223208	224217	226433	214280	238732	255473	1	1.00452	1.01445	0.960005	1.06955	1.14455	0	0.0312834	0.0999712	-0.276677	0.481158
P29144	TPP2	Tripeptidyl-peptidase 2	65001.6	61351	63767.6	59648.2	68846.9	64142.2	60090	62461.5	63299.5	68020.6	63909.9	64944	66917.4	69266.9	61616.8	66075.1	72781.2	73201.9	68362.1	77360.4	69591.1	68159.7	64582	75690.2	72368.6	71290.4	64237.3	69564.2	74156.3	76229.8	63723.1	63602.7	65331	71556.1	70078.3	71095.6	1	0.998112	1.02523	1.12292	1.09973	1.1157	0	-0.0163197	0.218099	1.06247	0.862016
O15131	KPNA5	Importin subunit alpha-6	532.604	388.8	913.088	765.532	857.806	645.817	561.433	424.239	622.062	574.914	429.268	298.667	476.115	1167.29	499.72	396.459	555.169	757.809	677.463	560.512	499.406	477.376	509.678	655.158	660.745	484.804	175.205	341.142	225.329	446.893	691.566	565.693	574.213	589.482	560.472	334.675	1	0.817988	0.830308	0.852388	0.81044	0.483937	1	0.647307	0.67118	0.713965	0.63268
Q6YN16	HSDL2	Hydroxysteroid dehydrogenase-like protein 2	40304.1	39400.7	34093.1	38136.2	36397.8	43332	40244.2	41409.6	42159.5	44420.6	38824.6	41409.4	40689.4	40358.2	41997.4	38374.4	39277.4	40591	31951.9	36701.6	38472.5	38875.4	37551	42574	41235.8	41001.8	41310.4	39986.5	43849.9	43144.4	37666.4	42313.2	40655.8	37379.2	39741.7	41858.6	1	1.12337	1.07937	0.992377	1.0551	1.1113	0	1.10843	0.713088	-0.0684936	0.495049
Q9H814	PHAX	Phosphorylated adapter RNA export protein	63474.6	62344.7	62951.2	59284.1	60010.9	57525.6	63453.7	62032.7	61320	67151.3	65636.4	62647.7	64403.5	64944	61498.9	62906.3	62910.8	68100.5	62571.6	66513.1	69585.3	69903.2	65158	65754.5	70690.3	64962.7	65253.5	64587.7	70048.5	69039.6	61613.1	62296.6	63826.1	64600.5	68218.3	66778.4	1	1.01109	1.03592	1.04849	1.1072	1.08383	0	0.132333	0.428438	0.578352	1.27876
O14641	DVL2	Segment polarity protein dishevelled homolog DVL-2	3528.58	2908.15	3713.34	3663.64	1751.48	5545.78	5393.14	4230.39	4306.43	3554.01	4676.97	3590.42	4142.54	2303.23	4477.51	3696.96	5210.73	4541.48	5369.25	3663.21	3846.36	4837.22	3216.06	2289.79	4470.52	4891.93	4905.66	3540.84	4444.64	4764.01	3113.04	4605.95	3838.13	4496.33	3731.99	4509.42	1	1.47957	1.23292	1.44435	1.19882	1.44856	0	1.06913	0.519267	0.990624	0.443252
Q719H9	KCTD1	BTB/POZ domain-containing protein KCTD1	25732.5	21905	28015.9	20882.8	25923.1	28032.7	25991	30534.1	25906.1	28838.1	28043.5	23196.9	27088.7	25875.5	30345.2	27203.4	27484.7	25101.5	30429.8	28744.4	31252.3	31183.9	30808.8	32911.3	29890.1	29968.9	29569.9	26863	27817.3	28553.1	24491.9	27860.4	26910	27792.7	31209.3	28554.4	1	1.13754	1.09873	1.13477	1.27427	1.16587	0	0.829166	0.595213	0.812509	1.65349
Q08378	GOLGA3	Golgin subfamily A member 3	183484	174654	174427	162016	161257	185256	171095	192772	174545	196115	167494	176002	177284	165134	183986	177320	173425	160307	167455	176422	192959	179180	178179	191873	184778	182831	192438	183493	219887	181813	171167	183956	173980	170986	185394	192092	1	1.07472	1.01643	0.998939	1.08311	1.12225	0	0.611186	0.13441	-0.00867837	0.679872
Q5T0F9	CC2D1B	Coiled-coil and C2 domain-containing protein 1B	7375.31	8090.18	8796.82	4961.15	7028.64	7040.27	8832.09	7577.58	8652.04	9776.06	9153.14	7305.58	7927.02	6767.78	9012.13	9439.25	9013.1	7515.8	7769.56	9957.87	8616.95	8349.61	7754.36	8086.73	7881.56	8373.71	9374.78	9121.32	9492.66	10548	7250.42	8375.61	8033.13	8739.12	8137.84	9382.09	1	1.15519	1.10795	1.20533	1.1224	1.29401	0	0.527845	0.367182	0.698374	0.416305
P34897	SHMT2	Serine hydroxymethyltransferase, mitochondrial	715440	706151	739077	693914	705610	698982	635541	750715	599191	710242	724404	711553	646957	675842	704949	719516	721728	652018	707718	714764	738287	721815	741652	826220	679994	750051	766759	776921	898716	741150	712038	678934	692741	703149	741593	786719	1	0.953508	0.972898	0.987515	1.04151	1.10488	0	-0.443277	-0.2584	-0.119034	0.395751
P55265	ADAR	Double-stranded RNA-specific adenosine deaminase	130881	120899	124366	121485	120762	138347	123892	142107	124440	135240	125716	126014	128920	127132	139019	121436	124913	114276	119230	121991	125836	121563	119861	129381	123051	133179	135944	135884	145789	124536	123678	132805	129360	120369	123938	135067	1	1.0738	1.04594	0.973245	1.0021	1.09208	0	0.801431	0.498918	-0.290558	0.0228369
Q99719	SEPTIN5	Septin-5	39449.7	41545.1	43327.3	37243.5	36889.5	39339.1	29916.8	41951.3	37968.6	41099.1	38034	40114.5	39250.8	37251.7	39893.4	39406.7	41607.7	38599.8	40391.4	37814	41586.7	40219.9	34076.3	43859.7	36670.3	46712.7	42826.6	41247.4	49576.6	44490.5	39691	38055	38908.9	39564	39282.6	44970.8	1	0.958781	0.980294	0.996799	0.98971	1.13302	0	-0.309868	-0.148139	-0.024065	-0.0773528
P30153	PPP2R1A	Serine/threonine-protein phosphatase 2A 65 kDa regulatory subunit A alpha isoform	279698	280732	303743	297180	277705	297984	288555	318327	299457	289372	280638	299247	285695	268572	293495	277625	276083	282668	298944	299916	277185	292574	285947	277929	267236	261685	272367	271981	275574	255459	287812	298739	285530	287047	280174	267413	1	1.03797	0.992071	0.997344	0.973464	0.929126	1	1.5357	0.888124	0.962523	0.625592
Q9ULP9	TBC1D24	TBC1 domain family member 24	29463.7	29358	28418.2	25116.2	28225.1	32574.5	29533.4	34411	30156.4	34584.4	32529.6	28475.9	9297.06	32570	30512	30835.7	30288.8	28145.5	30317.4	34041.7	33136.5	34703.4	27236.5	30933	29707.3	31173.7	33667.9	28241.4	36082.2	32629.9	28116.2	32251.9	26676.9	30725.8	31143.3	32359	1	1.14709	0.948807	1.09281	1.10766	1.1509	0	0.974766	-0.339246	0.615065	0.713469
Q96GY0	ZC2HC1A	Zinc finger C2HC domain-containing protein 1A	49539.4	48045.8	49242.5	51729.2	48063.8	54843.1	51436.4	58346.1	55128.5	54226.5	49556.7	54919.1	51183.6	48655.4	58148	52797.9	53629.7	55106.7	53699.1	51632.9	52440.9	56080.7	55405.2	66337.4	62125.5	52626.9	52643.1	51417.6	65865.1	60656.7	49324.1	54796.1	52492.5	53373.3	58477.9	56641.9	1	1.11094	1.06424	1.08209	1.18558	1.14836	0	0.74777	0.432976	0.553329	1.2509
Q15029	EFTUD2	116 kDa U5 small nuclear ribonucleoprotein component	1.21013e+06	1.19071e+06	1.23564e+06	1.14762e+06	1.17496e+06	1.23534e+06	1.11879e+06	1.30592e+06	1.19802e+06	1.30364e+06	1.11888e+06	1.22251e+06	1.21134e+06	1.11599e+06	1.2815e+06	1.20143e+06	1.14051e+06	1075127	1.18281e+06	1.15297e+06	1.27618e+06	1229927	1.12774e+06	1281143	1.19113e+06	1.21086e+06	1.2808e+06	1.306e+06	1497216	1.29792e+06	1.19181e+06	1.23234e+06	1.19004e+06	1.15057e+06	1.22122e+06	1.31856e+06	1	1.03401	0.998517	0.965394	1.02468	1.10635	0	0.319781	-0.0139483	-0.3254	0.232048
Q8TDJ6	DMXL2	DmX-like protein 2	7573.81	7556.3	2202.77	6772.09	3324.45	1788.56	2683.78	2141.21	6588.39	2354.26	2096.9	2507.18	2607.82	4189.5	3576.32	3076.03	2777.15	3204.69	6537.29	5864.99	4885.73	3277.61	7101.99	1474.34	2695.26	1945.79	1382.55	2125.71	2186.7	4796.63	5485.88	3111.24	2995.54	4292.03	3886.98	2487.48	1	0.567136	0.546046	0.782378	0.708543	0.453433	1	0.208031	0.169446	0.601839	0.466751
P00558	PGK1	Phosphoglycerate kinase 1	2.12631e+06	1.95691e+06	1.87769e+06	1929520	1.77766e+06	1866983	1.82409e+06	2.02196e+06	1.84137e+06	1.62993e+06	1.9503e+06	1.81671e+06	1.87568e+06	1.8793e+06	1.65357e+06	1.85372e+06	1.94341e+06	2.0707e+06	1.98566e+06	1.77814e+06	1.85431e+06	1.85354e+06	1.83798e+06	1.92258e+06	1669510	1.85425e+06	1.72996e+06	1667818	1.84019e+06	1.60041e+06	1.93362e+06	1.83687e+06	1.83511e+06	1.92633e+06	1.82759e+06	1.73852e+06	1	0.949963	0.949058	0.99623	0.945164	0.899105	1	0.504073	0.4951	0.962631	0.456507
Q04725	TLE2	Transducin-like enhancer protein 2	5733.22	6777.41	7730.3	5426.94	6754.11	9174.2	7947.33	8968.26	7553.04	8059.88	7919.7	8098.29	7103.57	7098.57	6869.76	6850.93	7600.11	8027.6	6394.58	7751.46	7588.77	3910.55	7861.64	8368.83	6369.71	6704.98	8266.2	8042.46	8505.4	9020.39	6484.4	8340.54	7417.98	7324.94	6819.9	8107.89	1	1.28625	1.14397	1.12963	1.05174	1.25037	0	1.14331	0.575047	0.517737	0.206656
Q96AZ6	ISG20	Interferon-stimulated gene 20 kDa protein	197.162	823.254	604.555	421.453	292.203	777.439	917.565	498.182	621.937	885.868	445.827	1001.12	786.372	518.446	896.792	1147.41	363.305	1029.21	660.208	532.602	542.766	568.168	982.945	1042.32	576.171	828.568	903.67	1041.66	706.911	815.585	467.725	740.198	729.711	746.548	742.475	859.279	1	1.58255	1.56013	1.59612	1.58742	1.83714	0	0.695877	0.669094	0.712092	0.701691
Q9UDT6	CLIP2	CAP-Gly domain-containing linker protein 2	2127.76	3027.11	827.509	1522.87	2860.9	3821.72	3802.8	4185.13	3456.09	1669.02	2816.67	3240.47	3133.76	2334.06	3745.81	3398.46	2300.57	3293.69	3481.09	768.9	2189.48	627.626	2919.35	2637.37	3127.33	3606.07	3150.12	3306.36	3863.27	3110.46	2073.23	3386.95	3054.15	2648.54	2300.23	3407.26	1	1.63366	1.47314	1.2775	1.10949	1.64345	0	0.984782	0.73531	0.43126	0.170161
Q9BRA0	NAA38	N-alpha-acetyltransferase 38, NatC auxiliary subunit	19354.8	16439.7	14482.4	18300.7	14829.2	10475.5	15476.7	16065.3	15828.5	15417.4	14116.3	15367.2	17231	15881.1	14388.6	15617.6	14659	17122.2	13346.8	16299.7	13415.4	12875.3	14062.2	16875.1	14034	14631.3	13677.8	13234.6	14692.3	13825	16681.4	14652.7	15396.8	15409.1	14252.4	14012.2	1	0.878388	0.922996	0.923729	0.854391	0.839992	1	0.239959	0.518748	0.523328	0.0899901
Q9H147	DNTTIP1	Deoxynucleotidyltransferase terminal-interacting protein 1	5497.56	6671.02	6830.11	6227.9	8966.38	8918.44	6723.06	7007.18	8536.6	7997.87	9379.51	7252.08	8283.39	8470.36	7980.11	8779.37	9501.33	9263.53	6876.89	8859.15	7714.88	5611.23	9060.84	8719.89	9812.1	8957.8	8748.82	8578.54	7495.61	9105.82	6838.59	7836.63	8273.09	8656.05	8183.79	8577.32	1	1.14594	1.20976	1.26576	1.19671	1.25425	0	0.574005	0.825028	1.04528	0.773667
Q9H0H5	RACGAP1	Rac GTPase-activating protein 1	2435.66	2679.66	2055.68	2221.13	3196.14	3675.15	3236.98	3814.78	3559.58	3616.16	2719.75	3199.98	3057.64	3376.36	3166.71	3582.49	3318.38	3543.27	2329.72	2524.96	2633.69	2302.29	2905.71	2432.98	2717.76	3055.01	3399.11	3254.37	3607.72	3024.18	2517.65	3580.53	3104.09	3059.76	2598.49	3268.08	1	1.42217	1.23293	1.21532	1.03211	1.29806	0	1.41636	0.781471	0.722401	0.107717
Q9HD26	GOPC	Golgi-associated PDZ and coiled-coil motif-containing protein	18183.6	25274.3	16892.2	17975.7	29626.2	28071.2	24081.3	23923.1	23826.5	27160.2	26690.1	29791.8	27548.3	21861	27550.7	26334.5	27850.1	27968	18264.9	18985.4	20011.8	19710.5	25887.6	19017	20214.9	27140.6	27995.2	23730.3	31815.8	31509.1	21590.4	25412.4	26688.4	23880.6	20968.4	28438.2	1	1.17703	1.23612	1.10607	0.971189	1.31717	0	0.558141	0.744468	0.334439	-0.0908371
A0A0J9YXV3	GREP1	Glycine-rich extracellular protein 1	2395	3777.24	4057.2	4046.97	2836.15	7425.91	4714.38	3463.27	5342.43	5608.92	4805.26	5086.83	1618.32	4437.04	6364.53	5621.85	3786.32	4455.07	3835.46	4591.55	5310.24	5629.58	4379.86	3132.46	2725.75	4144.95	5585.8	5971.13	5095.2	3667.22	3422.51	5310.98	4462.4	4458.05	4235.58	4892.86	1	1.55178	1.30384	1.30257	1.23756	1.42961	0	1.28437	0.707238	0.704281	0.552976
Q9P107	GMIP	GEM-interacting protein	1686.94	1918.51	1558.45	1965.6	1905.46	1767.48	1323.97	1508.62	1888.66	1900.3	1568.71	1590.16	1896.62	1627.5	2202.66	1840.8	2240.58	2019	1692.64	2315.64	1621.69	1542.11	1700.41	1509.03	1609.43	1477.39	1077.98	1415.66	1306.37	1424.53	1806.99	1677.81	1777.13	2021.73	1596.53	1340.39	1	0.928509	0.983474	1.11884	0.883531	0.741779	1	0.723141	0.936001	1.46022	0.548957
P0C0S5;Q71UI9	H2AZ1;H2AZ2	Histone H2A.Z;Histone H2A.V	6988.15	12565.2	6155.18	5339.92	10505.5	11350.8	14344.5	9493.79	15049.3	11181.1	15035.3	12523	11745.3	14154.9	11342.3	11244.8	12378.3	14836.6	6486	8132.1	9531.54	11360.8	10185.7	7131.61	11365	10139.2	12380.8	12232.2	11575.6	12705.7	8310.78	12283.9	12960.2	10615.6	9914.94	11806.7	1	1.47807	1.55944	1.27732	1.19302	1.42065	0	1.1365	1.32994	0.659277	0.458865
P18065	IGFBP2	Insulin-like growth factor-binding protein 2	65195.4	60411.5	61634.2	62088.8	64094	67866.6	61013.7	67108.7	62049.3	61894.9	57923.8	62712.5	57448	84413.2	61315.9	60368	61339.7	55538.2	54558.2	61446.2	61869.7	62833.3	59172.5	66966.6	65602.1	65887.6	66683.9	73238	79826.9	65744.6	62684.8	63986.6	64762.7	58650	63288.8	70276.2	1	1.02077	1.03315	0.935635	1.00964	1.12111	0	0.171492	0.273716	-0.531482	0.0795735
Q8IV50	LYSMD2	LysM and putative peptidoglycan-binding domain-containing protein 2	6024.85	6319.63	6003.67	6302.58	5292.56	5190.15	6383.95	6319.7	5377.03	5375.97	4782.29	5917.1	7573.86	5741.36	6728.79	7051.13	7988.77	7002.35	5820.83	7990.48	6630.26	6328.76	5616.52	6421.39	6965.49	6618.88	6728.63	8752.64	9212.2	6618.26	5988.66	5729.36	6148.68	7170.71	6392.48	7586.12	1	0.956702	1.02672	1.19738	1.06743	1.26675	0	-0.162318	0.100172	0.739955	0.252792
Q969Y2	GTPBP3	tRNA modification GTPase GTPBP3, mitochondrial	8160.5	9310.44	12429.6	9614.88	14480.6	16203.6	16010.4	16532.9	15733.5	15282.7	14989.7	13054.5	12907.5	14288.4	15197.4	14358.3	10631.3	15622.6	18566.7	18662	14071.5	14720.1	13472.6	15982.4	14583.6	15583	16274	11211.9	13474	15920.3	10799.2	15952.6	14087.5	15568.2	14566	14492.6	1	1.4772	1.30449	1.4416	1.3488	1.34201	0	1.3953	0.890305	1.29121	1.01987
Q9UMS4	PRPF19	Pre-mRNA-processing factor 19	619762	591937	540383	575527	580092	591478	541333	612529	589790	618344	559182	595523	579736	546038	615366	591800	593100	567155	574020	600632	613749	616074	603987	636921	611241	606121	626989	617615	714027	639351	581540	590695	579169	585341	616394	640821	1	1.01574	0.995923	1.00654	1.05993	1.10194	0	0.154433	-0.039999	0.0641231	0.587957
P82979	SARNP	SAP domain-containing ribonucleoprotein	289261	276982	285227	262127	254155	287871	263448	304041	274275	301818	257310	288139	272496	262786	309465	266723	268186	245125	265257	275103	289503	280353	277319	301933	288933	286795	304404	293284	347081	294743	273550	286290	278039	264079	287608	305261	1	1.04657	1.01641	0.965375	1.05139	1.11592	0	0.401752	0.141555	-0.298684	0.443314
P42898	MTHFR	Methylenetetrahydrofolate reductase (NADPH)	9826.78	9948.46	9364.68	9359.21	10871.7	9673.82	11355.3	9986.61	10098.6	11978.3	11081.7	10643.2	9933.26	11502.9	9486.81	10939.8	12722.3	12112.2	10527.3	11374.8	10184.3	12230.1	12146.2	11319.6	13535.1	13405	9761.46	11792.4	11486.5	12680.7	9874.17	10618.5	10529.6	11535.3	11883	11825.2	1	1.07538	1.06638	1.16823	1.20345	1.19759	0	0.381517	0.335928	0.851407	1.02964
Q15274	QPRT	Nicotinate-nucleotide pyrophosphorylase [carboxylating]	220062	207688	224339	213545	206778	215507	204758	228788	220366	222141	193125	226553	225523	195345	202196	214388	216617	205478	204533	201853	229716	221094	210820	223786	226919	218650	227689	239218	274622	237536	214482	218312	208548	208574	222467	239543	1	1.01786	0.972333	0.972453	1.03723	1.11684	0	0.152816	-0.236788	-0.235761	0.318605
Q7Z614	SNX20	Sorting nexin-20	190587	194475	194558	178432	180254	199982	180318	211094	185250	204159	177674	182486	195231	174509	243286	177826	172100	168822	175646	196805	201386	197876	185831	215427	214489	197040	207293	200693	241705	201140	187661	196160	194637	178240	203002	209574	1	1.04529	1.03717	0.949795	1.08175	1.11677	0	0.387857	0.318343	-0.429951	0.700062
P04626	ERBB2	Receptor tyrosine-protein kinase erbB-2	522177	488268	510987	476446	459466	455190	442007	478648	441821	504876	463994	495678	470529	463279	475164	507178	522706	480071	467952	506213	533022	503215	472286	520721	523286	499212	537288	534628	577139	536705	491469	464508	473729	496824	510506	536995	1	0.945143	0.963904	1.0109	1.03874	1.09263	0	-0.592196	-0.389665	0.117637	0.418165
O00115	DNASE2	Deoxyribonuclease-2-alpha	566323	512619	530090	476810	514384	545681	520017	590856	535614	630772	509527	571647	498023	530543	551715	515007	520912	495779	521931	520276	615894	549740	505543	640417	547192	565233	602364	567143	711414	541256	520045	564588	532291	514781	571757	597482	1	1.08565	1.02355	0.989877	1.09944	1.1489	0	0.575214	0.158139	-0.0679803	0.667796
Q86X02	CDR2L	Cerebellar degeneration-related protein 2-like	22260.9	20134.4	22322	20074.4	19890.4	20275	20710.6	23755.7	20548.1	21983.4	21574.5	20220	22380.9	21223.6	21905.7	23277.2	20487.3	19214.4	19182	21304.8	22707.4	22595.3	22547.9	23575	19280.2	23882.7	23810.2	22764.2	24507.7	21997	20936.4	21454.6	21460.9	20693.1	22141.2	23392.4	1	1.02475	1.02505	0.98838	1.05754	1.11731	0	0.210983	0.213575	-0.0990544	0.490543
Q9NZN8	CNOT2	CCR4-NOT transcription complex subunit 2	25109.7	26842.1	24620.6	25868	25943.2	25256	26517.4	26167.6	25705.5	27423.5	25077.2	23535.4	23985	25548.8	28628.1	25654.3	25205.8	27371.8	23790.2	26537.1	23250.2	25207.9	22315.3	27505.5	27614.1	24819.5	22326.6	21373.6	24524.6	19318.7	25676.7	26214	25354.9	25711.8	25178.6	22472.6	1	1.02092	0.987466	1.00137	0.980601	0.875214	1	1.16769	0.899559	1.01096	0.844544
O75843	AP1G2	AP-1 complex subunit gamma-like 2	39414	40799.2	34339.1	43754.8	44865.2	41265.9	43771.8	36157	43897.3	40926.1	42357.2	36996.1	40224.8	33783.6	40631.1	40783.7	44206.7	46390.8	35323.2	42325.2	38047.3	37638.8	45355.6	37767	45445.8	37765.6	33893.6	34632.4	36869	32418.2	40634.5	41203.6	38798.6	41805.9	40850.9	35115.8	1	1.01401	0.954819	1.02883	1.00533	0.864187	1	1.10313	0.66733	1.21227	1.03922
Q05513	PRKCZ	Protein kinase C zeta type	4285.99	2661.55	3473.45	3973.13	2537.33	2623.42	2349.01	3460.94	3084.93	1852.28	3170.16	3102.86	3086.35	3506.3	1143.14	3230.9	2482.05	4053.8	2547.51	2112.34	2613.8	3196.06	1731.22	753.271	1859.83	1169.63	2358.53	2131.67	675.305	3061.79	3386.29	2674.12	2801.76	2885.32	2030.84	1879.39	1	0.789689	0.827384	0.852059	0.599723	0.554998	1	0.527392	0.612099	0.667549	0.100503
O95721	SNAP29	Synaptosomal-associated protein 29	55357	55117.4	59571.4	53207.9	52388.9	65923.8	59762.8	68125	59415.5	68539.1	52400.2	56777.3	54126.6	58718.4	71305.1	55816.4	50803.9	52205.2	54239.9	61614.7	65270.7	58529.2	55200.2	67888.6	66071.9	58030.4	66231.5	58616	70292.5	58450	55128.5	64353.3	58665.5	54936	62592.1	62324.1	1	1.16733	1.06416	0.996508	1.13539	1.13052	0	1.28201	0.491552	-0.0267514	1.03726
P12931	SRC	Proto-oncogene tyrosine-protein kinase Src	5058.29	4215.15	8500.24	3657.21	7504.77	8551.4	6569	10704	8179.25	10493.2	10013	7820.4	6557	316.962	7868.39	4985.52	10280.7	3967.45	7528.02	6063.29	11941.3	10483	6115.62	6801.06	6531.48	8617.81	10408.4	10166.1	12001.2	5499.53	5787.13	8899.39	6515.15	6564.99	8374.49	9338.61	1	1.53779	1.1258	1.13441	1.44709	1.61369	0	0.876326	0.20499	0.219025	0.728528
P56945	BCAR1	Breast cancer anti-estrogen resistance protein 1	35976.5	40333	36024.8	39943.4	39866.4	40193.4	44512.1	49406.1	47645.8	45109.5	44668.1	44617.1	44781.7	46983.5	50173.4	35001.7	39618.9	37134.9	44658.2	48310.4	47198.2	37596	46376.5	53438.9	45849.9	40233.3	47708.4	39534.2	57192.7	46566.7	38428.8	45373.4	46244.7	40944.8	46091.9	46247	1	1.18071	1.20339	1.06547	1.19941	1.20345	0	0.888257	0.999708	0.321812	0.98016
Q9Y6X4	FAM169A	Soluble lamin-associated protein of 75 kDa	8158.37	11131.8	11962.8	7265.75	10956	11424.1	10977.3	14566.7	12357.8	13050.2	13450.2	12387.3	13233.5	10480	11313.1	12563.2	11576.2	11767.1	11507	12358.8	12912.8	13072.3	10747.4	11884.8	11750.9	11921.1	12757.8	11273.7	15192.1	12948.7	9894.94	12475.2	12172.8	11954.4	12073.7	12818.7	1	1.26077	1.23021	1.20814	1.22018	1.29548	0	0.882527	0.779092	0.704405	0.745175
P07858	CTSB	Cathepsin B	137448	139955	138521	143663	155400	151814	155913	156541	150524	171356	156505	157405	153361	168120	164322	164935	147691	171900	155499	177788	159013	160503	146105	167862	182655	156291	147445	152447	157196	161323	142998	157230	159943	163563	163228	154940	1	1.09953	1.1185	1.14382	1.14147	1.08352	0	1.19169	1.41885	1.72198	1.69391
Q9NVA2	SEPTIN11	Septin-11	786754	763340	774873	748066	737212	831484	767644	876404	834226	863652	730242	787012	767731	782770	895262	728697	745271	690644	743270	821047	784616	776324	749954	911053	851189	782126	830384	794153	917756	823865	762049	834682	792603	745786	814627	829657	1	1.09531	1.04009	0.978659	1.069	1.08872	0	1.07433	0.451936	-0.24055	0.777698
Q9Y383	LUC7L2	Putative RNA-binding protein Luc7-like 2	160759	168850	171008	172452	181272	199754	201100	187620	207519	198527	189217	183403	183111	187703	183839	175694	176436	192534	196503	191431	172993	185325	180289	184345	194696	183013	186542	187235	173518	198057	170868	198904	185455	186520	183530	185673	1	1.16408	1.08537	1.0916	1.0741	1.08664	0	1.89371	0.985259	1.05719	0.855226
P48449	LSS	Lanosterol synthase	21542.5	24155	23561.7	24370.7	27080.3	22453.7	25153	24703.1	25135.8	22652.9	28212.3	26537	26474.2	27951.5	24341.7	26502.3	25704.8	31045.7	26985	28543.2	19993	26772.7	22749.6	28174	29269.5	28479.9	27007.9	27192.2	25120.4	29596.7	24142	24019.7	26703.4	27756.2	25391.7	27479.4	1	0.994932	1.10609	1.1497	1.05176	1.13824	0	-0.0366573	0.767461	1.08293	0.374456
Q8N8S7	ENAH	Protein enabled homolog	191635	183880	192985	175183	179074	211968	190034	219510	195534	216523	182773	198945	188113	188185	222754	192638	177886	168611	174010	202227	208021	201461	187602	230365	209207	203971	216349	187758	234682	192983	184551	206714	196154	183074	207331	207149	1	1.12009	1.06287	0.991997	1.12343	1.12244	0	0.980758	0.513449	-0.0653629	1.00808
O15498	YKT6	Synaptobrevin homolog YKT6	112551	106037	100354	97692	95779.7	88385.3	92818.6	97910.2	97401.8	93823.8	93093.6	88618	96726.8	94682.5	91107.6	91801.7	87249.7	86694.9	88132.8	92028.8	102081	95062.3	88468.4	100095	89669.2	86371.2	95483.1	97759.1	93969.6	89115.6	102483	94067.9	92845.7	89181.6	95075.1	92539.7	1	0.917889	0.905963	0.870209	0.927717	0.902977	1	0.153696	0.0307717	-0.337735	0.254992
P51659	HSD17B4	Peroxisomal multifunctional enzyme type 2	554996	521893	539983	532488	526813	511055	514985	596854	519614	516003	551306	563297	552949	563774	524274	551557	589210	553510	559637	554210	539560	543058	548516	598188	523910	571379	551170	572788	592054	555932	535235	531702	551120	561625	550646	568665	1	0.9934	1.02968	1.04931	1.02879	1.06246	0	-0.105673	0.475183	0.789417	0.461014
Q8N5N7	MRPL50	Large ribosomal subunit protein mL50	64113.3	64365.1	62488.9	62907.9	59910.3	71103.2	67095.7	72487.3	68833.9	73031.5	67798.5	68031.9	66744.3	70199.1	76109	61460.2	63701.1	64535.3	62631.1	75098.5	65980	63139.2	65262.3	74408.7	74421.2	70606.3	68282.8	63142.3	68955.1	69093.5	62757.1	70510.3	69776.6	65485.3	68642.3	68016	1	1.12354	1.11185	1.04347	1.09378	1.0838	0	1.4743	1.33478	0.518767	1.11909
Q96PE7	MCEE	Methylmalonyl-CoA epimerase, mitochondrial	14865.4	18132.5	15585	15009.3	14854.4	15100.9	14494.4	16673.3	14269.1	16911	16350.3	16721.2	15840.3	15458.7	16571.3	18080.8	14828.6	14446.4	15124.2	18674.3	17399.6	18177.7	15594.7	19549.5	15365.5	17461.3	18047	18239.4	21314.4	16703.6	15689.3	15489.7	16188.4	16230.9	17217.4	18353.1	1	0.987279	1.03181	1.03452	1.0974	1.16978	0	-0.0749253	0.187337	0.203302	0.573641
Q9BTC0	DIDO1	Death-inducer obliterator 1	181440	167461	172726	169971	160315	199810	180148	210656	189800	206255	161078	176429	170228	172378	208506	166497	161055	159201	163149	186918	182996	178085	168946	210835	182815	176710	194807	178107	210505	183636	170383	197334	177724	167364	184735	188753	1	1.15818	1.04308	0.982282	1.08424	1.10782	0	1.46709	0.399607	-0.16433	0.781289
Q9Y6I4	USP3	Ubiquitin carboxyl-terminal hydrolase 3	2200.65	2082.43	2074.19	1653.83	2317.73	2685.91	1553.11	937.128	991.734	2298.12	2008.26	1455.11	1134.31	2249.22	1918.73	1185.29	1323.91	2253.63	3021.71	3077.91	2426.09	2675.17	3444.34	3005.53	2433.69	1909.76	905.479	1645.12	1349.24	1321.18	2065.77	1693.2	1753.13	2172.49	2796.96	1426.16	1	0.819648	0.848657	1.05166	1.35396	0.690377	1	0.417512	0.511203	1.16686	2.14319
Q9NYJ1	COA4	Cytochrome c oxidase assembly factor 4 homolog, mitochondrial	69261.7	66366.8	65939.5	59996.3	61841.1	75999	69709.1	73343.5	69083.8	73843.8	63488.8	73964.2	62110.8	69402.8	79364.3	68137.8	62670.4	66106.8	64414.4	66613	79001.2	67265	56829	78130.8	70561	66659.5	77666.8	72802.1	87017.5	68256.2	64681.1	72395.8	69666.2	65588.5	70357.4	74480.4	1	1.11927	1.07707	1.01403	1.08776	1.1515	0	0.787272	0.508718	0.0925969	0.579254
Q9NYL2	MAP3K20	Mitogen-activated protein kinase kinase kinase 20	24405.3	23420.7	18350.8	23950.4	22605.6	22609	19003	27247.4	23528.5	25500.5	21624.9	24065.9	25072	19660.7	24671.7	23616.2	24073.5	24446.4	11744.7	13356.1	21406.2	21293.2	20488.5	19184.6	16553.6	25934.3	25871	26944.3	30222.5	23896.1	22546.5	23577.7	23019.1	19447.4	19785.2	26573.6	1	1.04573	1.02096	0.862545	0.877528	1.17861	0	0.256047	0.117333	-0.769578	-0.685692
P24534	EEF1B2	Elongation factor 1-beta	666876	631500	619721	615120	595696	608657	547617	601414	561031	604019	609700	627536	591417	579554	613647	644714	617623	616637	583757	665289	663925	644527	636760	681927	606003	678277	661650	641421	719144	676240	625783	584548	604371	625604	646628	675346	1	0.934106	0.965784	0.999715	1.03331	1.0792	0	-0.831959	-0.432003	-0.00360091	0.420583
Q96F07	CYFIP2	Cytoplasmic FMR1-interacting protein 2	23659.7	16489.6	19306.2	16049.9	13298.9	18909	11239.3	18896.7	12635	14784.2	21112.2	14281.9	19095.8	19653.4	22512.9	15658.5	12925.3	13869.1	11179.6	12898.6	16072.4	27133.1	15055.8	23657.8	19470.4	25522.2	21268	25297.7	20038.2	21459.3	17760.9	15292.9	19331.2	13306.2	20277.9	22717.1	1	0.861042	1.08842	0.749188	1.14172	1.27905	0	-0.497963	0.316849	-0.898798	0.507854
Q9Y2H5	PLEKHA6	Pleckstrin homology domain-containing family A member 6	61537.7	63354.3	55885.5	46558.8	54238.1	71717.8	67552.5	49561.9	58267.4	64303.3	62474.3	63803.4	64409.4	43158.9	55501.6	57419.1	63768.4	51511.1	50049.9	52375	48698.1	63619.7	54250.9	74858.7	67926.4	66891.3	60134.8	65689.1	74458.4	62339.9	56314.9	62280.6	57869.5	55024.7	61870.8	65902.7	1	1.10593	1.02761	0.977091	1.09866	1.17025	0	0.622218	0.162148	-0.13456	0.579474
Q9BRV8	SIKE1	Suppressor of IKBKE 1	4923.66	4745.11	4669.38	3947.22	3038.57	3262.25	3457.37	3421.77	3385.56	3917.89	3292.32	3337.08	3120.67	2920.38	3314.59	3856.64	3733.97	3482.92	4708.86	3508.83	4323.5	4437.16	3094.96	3916.91	2483.52	1208.24	3617.93	2450.49	3944.24	1885.23	4264.79	3488.97	3197.01	3858.24	3651.21	2621.22	1	0.818087	0.749629	0.904674	0.856129	0.61462	1	0.527964	0.350327	0.752644	0.626678
Q96BN8	OTULIN	Ubiquitin thioesterase otulin	35326	35105.2	33154.8	35531.2	33337.6	36638.8	38376.1	37371.4	37934.1	38554.4	34241.9	36940.8	37060.9	38751.1	36996.4	35562.5	37984.4	37240.5	33913.5	36888.4	35574.7	37985.2	36472.1	41308	35490.2	31912.1	29522.1	32591	32580.2	31078.3	34490.9	37774.9	36798.2	36317.9	37366	31536.8	1	1.09521	1.0669	1.05297	1.08336	0.914349	1	2.11165	1.78102	1.61841	1.97323
O94964	MTCL2	Microtubule cross-linking factor 2	16424.2	15702.3	17284.4	15293.4	17366.7	15375.9	15613.4	18171.8	13819.5	17983.1	14549	16444.3	14297.1	17931.3	20348	16601.7	16977.8	14394.9	17482.9	19659.5	16778.7	16901	12549.1	16501.3	17310.7	19358.4	19814.9	17365.7	18590.4	17509.9	16414.2	16192.7	16713.9	17023.4	16008.2	18527.8	1	0.986508	1.01826	1.03711	0.975263	1.12877	0	-0.104779	0.141807	0.288202	-0.192103
P05067	APP	Amyloid-beta precursor protein	24225.2	30597.3	24728.1	26190.6	29341.9	33773.9	31650.5	33576.8	32013.2	36312.8	28404.9	31172.7	26404.9	27628.8	33146.5	30932.9	29487.6	26395.1	28881.3	30965.2	30057.6	29923	28578.2	32605.4	29620.3	30030.4	33139.9	30541.8	35342.7	28412.8	27016.6	33465.5	29351.6	29332.4	30156.9	31493.5	1	1.2387	1.08643	1.08572	1.11624	1.16571	0	1.44047	0.521558	0.517283	0.701446
Q9HCD5	NCOA5	Nuclear receptor coactivator 5	1888.64	2224.76	7046.12	1549.47	2436.79	1634.68	5453.5	17262	7916.91	8061.41	4352.62	1334.55	8022.04	1901.11	9648.06	1523.14	6330.83	10404.2	4791.47	3166.05	1897.12	2687.62	2690.86	1912.89	2117.55	8674.24	8963.02	2298.02	8280.26	5206.23	3029.16	8065.7	5051.68	5243.13	2261.21	6684.35	1	2.66269	1.66768	1.73089	0.746481	2.20667	0	1.37791	0.553327	0.605706	-0.210098
P62917	RPL8	Large ribosomal subunit protein uL2	43421.7	49911.3	47238	51818.9	63979.2	66923.6	66138.7	66774.7	66159.5	72831.6	61518.1	60021.9	60713.9	68443.6	61985.3	51373.2	56543.9	68329.9	62904.7	73855.8	51756.4	62134.3	57794	60275.2	80152.1	67696.3	56155	58697.7	56130	72392.5	51273.8	67765.6	62536.6	62601.5	62422.4	62214.3	1	1.32164	1.21966	1.22093	1.21743	1.21337	0	1.50741	1.02946	1.03539	1.01902
Q92597	NDRG1	Protein NDRG1	127689	121039	124401	122514	113171	128595	117485	131479	123282	124121	108375	117457	117274	119753	129004	114151	113750	106843	114418	120109	125950	124652	114309	136181	118184	110496	115108	108416	119525	103786	121763	124992	118373	113854	123855	111466	1	1.02652	0.972158	0.93505	1.01718	0.915437	1	1.31365	0.670756	0.231933	1.20321
Q6ZVZ8	ASB18	Ankyrin repeat and SOCS box protein 18	329475	214220	311295	239865	188671	136427	195926	166720	192527	86094.4	133660	188749	246957	346077	168994	250245	216472	99803.5	487.701	444326	264822	497882	65503.3	313512	87640.1	101955	189590	139367	146339	273430	256705	155539	216888	202267	245872	170136	1	0.605905	0.84489	0.787934	0.957799	0.662769	1	-0.168619	0.540048	0.371157	0.87486
Q02218	OGDH	2-oxoglutarate dehydrogenase complex component E1	95887	100570	91324.8	112890	131241	130726	133972	121416	133346	135434	122482	117272	129312	139536	129672	116674	118037	161516	122312	141987	111368	122358	121063	116197	135903	128424	120138	126624	113429	148155	106383	130979	127655	132105	121378	127354	1	1.23121	1.19996	1.24179	1.14095	1.19713	0	1.17285	1.01434	1.22655	0.715025
Q08211	DHX9	ATP-dependent RNA helicase A	349745	345422	346057	341087	326288	373982	331937	375880	349546	368158	354166	357280	340201	357893	369584	357666	362077	369576	334103	382685	357310	360967	348970	387225	377216	366087	363560	343518	407805	378692	341720	359901	355825	361221	366337	371932	1	1.0532	1.04128	1.05707	1.07204	1.08841	0	0.601763	0.466865	0.64548	0.814813
Q06203	PPAT	Amidophosphoribosyltransferase	220843	205778	216410	213947	213268	209417	210951	225816	220799	207328	197769	215344	208468	187432	150255	221454	221294	197075	197640	198335	202886	207325	201718	226691	191822	218444	236721	223702	254217	228755	214049	214862	191854	207160	206088	232368	1	1.0038	0.896305	0.967812	0.962808	1.08558	0	0.044379	-1.21167	-0.376112	-0.434589
P55036	PSMD4	26S proteasome non-ATPase regulatory subunit 4	206730	190292	184660	173275	181630	209046	202568	216092	201482	216351	174686	199815	184917	187279	195993	184470	174610	182970	193240	199386	214299	198473	183196	205496	206025	213707	199845	199660	223292	196574	187317	209108	188538	186935	201498	206616	1	1.11633	1.00652	0.997959	1.0757	1.10302	0	1.12915	0.0632558	-0.0198086	0.734815
P27635	RPL10	Large ribosomal subunit protein uL16	70094.7	73434.2	70127.8	61055.6	87126.3	89500.4	96805	95908.8	98728.1	106722	84140.4	77805.3	87548.8	98629.6	99376.8	82860.1	84487.2	93394.1	81209.8	90154.1	78094	91539.8	85857.2	80616.7	90810	88433.1	84505.2	83984.4	75539.5	86974.8	72367.7	97532.9	89500.2	86421.1	85383.6	83887.4	1	1.34774	1.23674	1.19419	1.17986	1.15918	0	2.18454	1.48724	1.21995	1.12988
P19793	RXRA	Retinoic acid receptor RXR-alpha	11735.7	10448.8	11984.8	10186.6	12185.5	10610.2	9350.71	10021.9	10321.9	8716.37	11034.7	10972.1	10950.7	11197.7	8853.04	10378.4	12244.5	13225.5	12217.9	11613.4	9020.51	12801.6	10815.3	9481.56	9187.37	9099.97	6952.95	10555.2	9665.86	9845.18	11308.3	9804.22	10601.7	11935.9	10261.3	9223.84	1	0.866995	0.937513	1.05551	0.907412	0.815672	1	0.278435	0.661004	1.30112	0.497698
P09497	CLTB	Clathrin light chain B	721824	689082	735501	669679	637311	739969	668161	816002	698997	775079	666714	716213	662789	674256	738569	678100	696338	632854	675745	743011	736029	726339	683869	807770	796336	748476	788478	704056	864020	742296	690680	739642	691708	685209	750069	769465	1	1.07089	1.00149	0.99208	1.08599	1.11407	0	0.621457	0.0130582	-0.0694316	0.753804
P50402	EMD	Emerin	78464.7	75259.6	76384.2	69216	68398.1	78569.2	73408.7	85561.3	75852.2	84787.3	69951.4	78195.6	72024.8	76874.6	84185.9	74210.4	71963.1	69930.9	68810.6	76144.2	77680.2	75979.2	69328.5	82050.8	82513.1	79377.9	80037.6	77515.9	92837.9	80951	73544.5	79635.7	76246.5	72211.8	77510.4	82144	1	1.08282	1.03674	0.981879	1.05392	1.11693	0	0.708322	0.314201	-0.154972	0.461172
Q92692	NECTIN2	Nectin-2	17258.2	15221.1	20315.4	13900.7	16558.2	17152.8	16209.8	16786.3	16328.5	18127.2	16289.2	17825.3	16624.9	14635.9	17479	18042.9	18888.7	14560	15442.6	19862.4	14759.7	17451.6	15230	16435.1	15267.7	18339.5	19511.3	18780.5	24378.5	20501.5	16650.7	16920.9	16570.9	17359.3	15828.8	20302.3	1	1.01623	0.995207	1.04256	0.95064	1.2193	0	0.0739965	-0.0218577	0.194054	-0.225077
Q9UNH7	SNX6	Sorting nexin-6	91887.1	70960.7	84877.4	85748	91090.7	87402.9	86747.7	68525.9	80240.8	88527.7	92572	69926.5	76073.4	92521.1	69919.1	60834.1	66542.6	82154	49491.3	56828	65266	54633.1	64972.1	98855	93821.2	77420.7	62588.2	78498.8	62922.5	78088	84912.8	82289	80202.4	63170	75509.5	71903.6	1	0.969101	0.944527	0.74394	0.889259	0.846794	1	0.798314	0.637919	-0.671347	0.277178
Q56P03	EAPP	E2F-associated phosphoprotein	20078.3	25398.3	21857.3	20768	25319	22616.3	25944.8	24357.3	24881.2	26981.3	22088.3	25774.4	23264.5	25917.6	19553.8	25066.3	24793.5	23153.9	21214.2	26796.6	24417.5	20780.7	22469.5	26049.9	23709.4	25604.5	25403.4	26041.1	25661.3	26634.9	22684.2	24956.2	23319.7	24204.9	23485.4	25869	1	1.10016	1.02802	1.06704	1.03532	1.1404	0	0.713378	0.199553	0.477487	0.25157
P54819	AK2	Adenylate kinase 2, mitochondrial	978159	916416	976405	886165	829360	909356	833294	964886	873793	986273	882765	969912	903355	874529	974692	911253	909284	810478	841042	935006	1.01618e+06	955777	885374	1.01669e+06	990522	974257	1.02815e+06	981682	1.20519e+06	994392	917301	913521	921051	881413	972908	1.03673e+06	1	0.995878	1.00409	0.960876	1.06062	1.1302	0	-0.0316555	0.0313937	-0.300495	0.465599
P47914	RPL29	Large ribosomal subunit protein eL29	160395	156130	142827	170580	158440	212708	199595	199827	193538	213457	167279	158865	164130	194581	199306	153173	160304	179230	162549	198835	169754	171338	168145	196109	195246	172607	173463	164544	171911	173856	157675	203825	176832	170818	180118	171276	1	1.2927	1.1215	1.08336	1.14234	1.08626	0	3.393	1.40847	0.966345	1.65008
Q08379	GOLGA2	Golgin subfamily A member 2	30548.5	36275.5	27920	26643.5	35318.2	44565	35223.5	41043.5	36440.1	43370.9	35775	41406.5	36964.6	41267	42452.9	38434	37816.6	36946.3	27675.1	27464.4	32624.9	30623.9	37074.1	33662.9	40383.4	36295.9	45201	35671.6	38986.4	33292.1	31341.1	40128.6	39573.2	33667.3	34873.8	37889.4	1	1.28038	1.26266	1.07422	1.11272	1.20894	0	1.34195	1.25714	0.355232	0.539486
Q969R2	OSBP2	Oxysterol-binding protein 2	129282	124824	137386	129013	123340	132376	123287	131812	131003	124968	121504	125370	120730	115271	141999	117759	114450	108141	127391	128484	127128	118965	124689	135857	126625	116913	124250	121721	120688	111975	128769	128689	124975	119245	126653	119109	1	0.999382	0.970535	0.926038	0.983565	0.924984	1	0.991756	0.607217	0.0140613	0.780908
Q9BUQ8	DDX23	Probable ATP-dependent RNA helicase DDX23	69448.8	78507	70303.4	81304.6	87293.3	78421.5	84234.8	76276.8	80544.8	83829.1	91157.8	85453	87786.1	95972.1	73637.1	85986.9	97903.1	109441	87072	92895.4	81840.2	88476.1	89079.4	81602	89471.6	98466.8	80887.7	89587.4	81023.9	99162.2	77371.4	80661.4	86801.2	94659.6	86093.9	89825.6	1	1.04252	1.12188	1.22344	1.11274	1.16097	0	0.264169	0.757161	1.38815	0.700366
Q14318	FKBP8	Peptidyl-prolyl cis-trans isomerase FKBP8	12862.8	19636.3	16141.6	17006.6	19283.2	21928	19746.9	20775.6	21618.4	24763.5	21800	25675.5	18974.6	24715.5	18826	22569.2	22037	23139.1	13207.2	16331.1	18980.8	18168.8	19575.5	15806.3	24563.4	19121.1	20426.8	19174.1	22775.2	21755.3	16986.1	21766.5	21998.3	19456.7	19419	20650.5	1	1.28143	1.29508	1.14545	1.14323	1.21573	0	1.30454	1.36782	0.674221	0.663918
Q13084	MRPL28	Large ribosomal subunit protein bL28m	7704.14	8651.02	7859.42	8578.34	9943.9	9265.59	10140.1	8763.57	10189.8	9625.08	11945.5	10197.2	10352.1	10732	9414.47	10548	11520	14276.3	8798.57	11314.5	9507.17	10499.7	10069.5	8505.04	10846.6	10565.4	9666.59	10055.6	9099.54	12819.9	8547.37	9596.81	10528.2	11291.5	9885.59	10441.4	1	1.12278	1.23175	1.32105	1.15657	1.2216	0	0.554074	1.04584	1.44881	0.706538
O60869	EDF1	Endothelial differentiation-related factor 1	321882	308103	320738	308119	276855	328426	298933	342432	310584	346241	293721	311670	304121	290750	343116	298876	294893	274108	284124	307884	334100	313757	299539	331434	324198	317058	342605	328162	379116	333930	307139	325323	308676	291977	320606	340174	1	1.05921	1.005	0.950635	1.04385	1.10756	0	0.550449	0.0465176	-0.458964	0.407645
Q9H0F6	SHARPIN	Sharpin	35666.9	38367.2	33420.6	28757.5	31888.4	39723.7	41248.9	43351.8	32474.9	43107.5	36711.5	41579.5	32033.8	42266.4	39827	34215.4	31152.4	36164.2	37962.6	42137.1	40764.2	37099	37695.6	48136.4	43482.5	38569	41092.8	38830.1	38492.3	35430.1	33620.1	39981.3	38483.6	36326.4	41435.5	38482.9	1	1.18921	1.14466	1.0805	1.23246	1.14464	0	1.30815	1.00016	0.556527	1.6072
P39019	RPS19	Small ribosomal subunit protein eS19	368028	373687	361090	370401	421347	403580	393441	403495	393680	438265	411057	395204	397953	428792	414014	399780	416902	466129	407940	378547	397297	412766	396593	375414	424647	432360	392262	403758	404273	446823	378911	406492	409404	413860	401344	415895	1	1.07279	1.08048	1.09224	1.0592	1.09761	0	0.745763	0.824497	0.944965	0.606552
Q8N8A2	ANKRD44	Serine/threonine-protein phosphatase 6 regulatory ankyrin repeat subunit B	52961.3	16384.3	23940.7	35415.9	12624.1	22026.1	3152.52	19087.5	23991.8	15905.5	18466.7	18299.4	9516.59	20821.4	15315.4	12308.2	16796.8	9929.65	6448.68	22826.7	21149.8	17469.7	14009.4	21097	16760.5	6942.33	12445.4	17920.4	17170.3	2705.33	28265.3	16832.7	16483.9	13662	18097.3	11436.7	1	0.595525	0.583185	0.483349	0.640265	0.404622	1	0.320642	0.299915	0.132231	0.395787
Q9P0P8	MTRES1	Mitochondrial transcription rescue factor 1	6228.2	24941.1	13775.8	25432.9	22839.3	20189.9	24528.2	31155.4	28654.1	23608.8	21470.9	29480.5	23700.8	20212.7	23931.4	4466.94	26608.9	22764.4	23723.8	27127.3	8853.66	17175.5	29156.6	25640.6	31014.2	33073	27715.3	27263.8	32121.1	32081.1	18643.5	25627.3	23759.3	20938.3	22368.1	30450.9	1	1.3746	1.2744	1.12309	1.19978	1.63333	0	0.591476	0.433274	0.194353	0.31545
Q13905	RAPGEF1	Rap guanine nucleotide exchange factor 1	31846.6	32475	30632.6	35318.7	31628.7	32568.8	33423.4	36342.9	34432.9	31759.3	31301	27654.8	32520.3	29830	29610.1	27264.8	31151.3	33613.3	30840.7	27070.7	31111.7	30206.2	29595.8	34512.4	31716.7	28325.1	27034.4	29271.4	29712.9	31424.9	32380.3	33705.5	30183.3	29988.2	31428.6	29153.7	1	1.04093	0.932149	0.926124	0.970608	0.900354	1	1.41071	0.319076	0.258613	0.705033
P22033	MMUT	Methylmalonyl-CoA mutase, mitochondrial	144965	132362	139365	126402	126846	121957	127380	132340	122379	127913	141833	128969	135658	133294	118182	140054	139167	142726	136361	134216	132981	141803	133653	125328	124414	117888	121273	125999	126925	123347	133988	126394	131587	138505	131636	123086	1	0.943323	0.982084	1.03371	0.982445	0.918638	1	0.303393	0.779795	1.41434	0.78424
Q08AM6	VAC14	Protein VAC14 homolog	36684.5	38084.9	37466	35694.4	37221.4	38664.1	41249.8	38203	36708	36922.4	40891.1	33176.8	41651.1	38185.4	38183.4	33397.8	34844.7	33551.7	32499.5	39426.5	40661.9	36230.1	33330.8	36806.7	34461.1	36493.8	25190	34404.2	28164.2	33487.7	37030.3	38349.5	38417.6	34744	36298.1	31548	1	1.03563	1.03746	0.938261	0.980229	0.851952	1	1.24063	1.25306	0.582982	0.866454
Q96HJ9	FMC1	Protein FMC1 homolog	84117.1	78892.4	77149.4	78330.9	78062.2	73761.3	66770	80100.9	72492.3	83620.4	79439.1	86656.7	80750.9	79410.3	78195.8	80624.4	85629.4	71888.4	78311.5	83556.5	92674.9	84279.8	75187.3	95673.7	87597.7	85452.3	90243.8	85634.2	99890	79989.9	79310.4	75349	80890.6	80002	87082.7	88242	1	0.950051	1.01992	1.00872	1.098	1.11262	0	-0.44353	0.176918	0.0774382	0.870198
O14737	PDCD5	Programmed cell death protein 5	217926	526078	444125	169485	473826	472252	427482	503698	451075	502927	483765	273583	501812	494344	497326	529564	428357	451831	417112	284282	566361	529311	468509	289560	493416	508620	552306	539670	631299	557825	366288	471487	450166	422229	469431	557944	1	1.2872	1.229	1.15272	1.28159	1.52324	0	0.548895	0.437651	0.291883	0.53817
P23511	NFYA	Nuclear transcription factor Y subunit alpha	11115.3	9703.58	9871.97	7941.79	8133.97	8461.94	9503.07	8683.79	7435.52	6920.65	6307.5	9192.76	8232.72	7835.42	9388.95	9038.78	9355.87	6493.65	9567.09	9534.26	8838.87	9204.89	7390.11	8523.78	7371.05	8695.82	7771.97	6749.04	7022.68	7696.37	9353.33	8200.99	8191.47	8797.93	8265.74	7587.18	1	0.876799	0.875781	0.94062	0.883721	0.811174	1	0.347544	0.342151	0.68553	0.384202
Q8IZE3	SCYL3	Protein-associating with the carboxyl-terminal domain of ezrin	10703.4	12659.5	11766.9	10832.9	13054.1	12667.2	11919.4	12930.7	12704.2	12909.6	12752.6	9013.74	12889.3	11015.1	11376.9	10736.6	10269.7	10280.3	9301.32	11237	11326.3	10947.9	10895.5	10444.1	11050.5	10200.8	10971.9	10950.2	8516.76	8532.53	11803.4	12626.2	11409.5	10365	10932.9	9834.43	1	1.06971	0.966634	0.878137	0.92625	0.833189	1	1.41792	0.799975	0.269454	0.557882
P33991	MCM4	DNA replication licensing factor MCM4	122705	121354	116606	130870	152606	136766	139115	135649	135713	148169	140170	129330	134226	146903	130842	129392	145737	165815	135012	158602	130493	136651	132567	137804	147035	152845	135515	142784	142002	165586	128828	139082	136294	146912	136910	147746	1	1.0796	1.05795	1.14037	1.06273	1.14685	0	0.542032	0.394651	0.955875	0.427192
Q9NY26	SLC39A1	Zinc transporter ZIP1	10561.7	11031.2	9631.7	9881.57	11090.4	13226.7	12062.5	12606	12126.8	14264.5	10163.7	11115.8	9945.68	12428.2	13989.5	10776.9	10809.8	13321.5	10455.4	13021.6	12087.4	11369.7	12709.7	10988.7	13282.4	12049.8	12053.7	12115.3	10695.5	13316.9	10439.3	12857.3	11528.6	11677.1	12087.6	12046.3	1	1.23162	1.10434	1.11857	1.15789	1.15393	0	1.50473	0.677845	0.770254	1.02574
Q9UDY2	TJP2	Tight junction protein ZO-2	67531.9	65061.6	75182.9	66794.4	63782.4	71107.7	63622.3	77461.4	74820.4	75776.3	71428.4	31770.3	70318	67611.4	66109.1	67258.4	76596.8	71662	69797	69191.4	76031.7	72238.3	65910	77247.3	56075.9	76694.3	76039.7	67142.7	78432.1	77710.5	67670.6	72557.6	61447.4	70901.1	69500.6	75203.9	1	1.07222	0.908037	1.04774	1.02704	1.11132	0	0.648724	-0.826096	0.42883	0.24292
Q9Y3A3	MOB4	MOB-like protein phocein	145540	138813	144468	130167	134474	152863	138705	153474	145063	151666	133039	142604	143550	140595	159378	134742	137344	129656	134301	147214	150001	143396	138109	161398	149724	147145	157272	146051	170982	144326	138692	148354	143833	136651	148526	153155	1	1.06966	1.03707	0.985285	1.0709	1.10428	0	0.668034	0.355455	-0.141107	0.679898
O60739	EIF1B	Eukaryotic translation initiation factor 1b	15096.8	17627.4	22830	20852.5	11212.9	18179.7	20752.3	16923.5	17768.7	13280.7	18220.6	18592.7	18453.7	15832.1	18705.2	6469.59	16753.7	9578.12	20667.6	14110.3	11451	14759.7	19091.9	9043.44	18185.6	13704.3	11300.2	13792.4	7353.43	12841.1	17523.9	17381	17960.8	13515.9	14506.3	11798.3	1	0.991845	1.02493	0.771282	0.827803	0.673268	1	0.975041	1.07631	0.299983	0.472971
Q9H6K5	PRR36	Proline-rich protein 36	15754.1	15733.4	13239.5	14319.8	12391.8	15311.6	12503.3	17488	12273.8	15175.3	13824.3	14790.9	14902.7	14620.5	14760.2	15350.1	15445.3	12419.1	12643.2	13457.2	14969.7	14190.2	13664.2	15621.6	14913.9	15580.9	17576.8	15264.1	19260.1	16603.8	14287.7	14550.4	14579.7	13863	14671.9	16857.1	1	1.01839	1.02044	0.970275	1.02689	1.17984	0	0.102243	0.113658	-0.165291	0.149533
Q14C86	GAPVD1	GTPase-activating protein and VPS9 domain-containing protein 1	73330.3	42664	42927.9	89470.5	46132.3	40328.2	40668.3	202007	43461.5	43248.9	226463	51869	43025.5	46925.5	43366.7	45839.8	47792.2	45272	41738.3	46109.4	44845.5	46162.1	41841.1	44502.6	36728.4	41084.4	38353.9	38556	39267.9	41213.5	58905	73942.8	82329.9	45350.3	42815.9	39695.1	1	1.25529	1.39767	0.76989	0.726864	0.673884	1	1.78282	2.21942	0.294391	0.162458
Q8TBC5	ZSCAN18	Zinc finger and SCAN domain-containing protein 18	29072.3	30606	32733.1	25603.2	30061.3	35743.4	31656.3	36712.9	31550.8	33564.2	31948.5	31908.3	32147.3	33542.5	31412.9	31064.1	31947.3	33167	29866.9	33304.5	34742.4	34084.4	30540.8	35439.1	34953.5	32282.4	32866	33658.5	37347.2	32056.9	29615.2	33845.5	32191.9	31870	33952	33642.2	1	1.14284	1.08701	1.07614	1.14644	1.13598	0	1.05049	0.639856	0.559913	1.07694
O15394	NCAM2	Neural cell adhesion molecule 2	6269.67	5875.29	6485.18	5054.88	8276.16	7446.22	7898.47	9208.42	7522.75	9341.85	8437.52	6917.71	7779.72	8553.2	8133.55	8523.49	6431.49	7226.64	7960.05	7778.05	8149.25	9099.51	6161.85	7888.44	5218.91	6575.99	8865.84	7797.77	8807.87	8596.66	6392.23	8283.54	7964.34	7583.94	7303.59	8128.83	1	1.29588	1.24594	1.18643	1.14257	1.27167	0	1.08909	0.905281	0.686235	0.524796
Q86YS6	RAB43	Ras-related protein Rab-43	57481.9	56933.5	61400.7	53375	60358	55146.1	56836.1	29349.1	26292.6	29131.6	61163.2	59773.9	57498.2	61158.2	59954.6	65530.9	64024.3	65428.1	65410	69888.3	63111.2	65587.6	62254.8	64872.9	60157.9	66274	60927.2	61296.7	70145.6	61650.1	57909.8	39351.1	59909.6	66056.3	63196.9	64058.7	1	0.679524	1.03453	1.14068	1.0913	1.10618	0	-3.01821	0.325234	1.32487	0.859837
Q13554	CAMK2B	Calcium/calmodulin-dependent protein kinase type II subunit beta	96033.5	96681.7	91071.2	105159	111092	106465	105593	102481	110636	98715.9	103134	95781.9	102250	106408	102017	93844.1	98700.2	107742	100512	110286	92132.5	95557.1	94734.7	95515.7	104784	110244	107738	107122	109734	116143	100008	104778	101918	102217	96544.9	110196	1	1.0477	1.01911	1.02209	0.965376	1.10188	0	0.468234	0.18754	0.216841	-0.339854
Q02241	KIF23	Kinesin-like protein KIF23	1803.85	1933.36	2735.69	2315.88	2147.02	1653.09	1969.62	1823.63	1846.2	1428.46	1958.37	2874.88	1602.39	2201.56	1205.01	2900.48	1830.86	1722.1	2085.8	1661.22	1605.7	2608.08	2982.82	2506.68	2557.19	1462.34	1782.19	1628.28	1415.87	1826.58	2187.16	1744.2	1968.44	2040.09	2452.09	1623.05	1	0.797471	0.899997	0.932758	1.12113	0.742082	1	0.214754	0.61227	0.73929	1.46965
Q9H974	QTRT2	Queuine tRNA-ribosyltransferase accessory subunit 2	65954.5	63741.7	62917.4	59441.5	58072.3	55151	56704.1	61206.5	55717.3	52391.8	59234.8	59666.8	59678.7	55150.3	58726.7	63287.5	57798.4	57674.2	60516.5	53970.9	58726.4	58295.2	61251.6	54383	58987.2	53453.1	59320.1	56076	59985.2	52213.2	62025.5	56234.1	58491.5	58649.5	58328.7	56209.5	1	0.906629	0.943023	0.945571	0.940398	0.906233	1	0.00423188	0.392357	0.419531	0.364366
P18206	VCL	Vinculin	538599	498934	522348	472995	447038	511160	416335	535998	445848	490418	452006	509526	491571	447759	497281	502008	516601	443743	462769	510690	539803	526970	497787	546775	510952	526741	555439	519946	624967	546939	495983	479952	479629	487162	524458	554806	1	0.967678	0.967027	0.982216	1.05741	1.1186	0	-0.272526	-0.278021	-0.149948	0.484073
Q9BY11	PACSIN1	Protein kinase C and casein kinase substrate in neurons protein 1	8561.02	9363.13	9014.69	8798.07	9066.15	11286.9	10174.7	10793	9510.57	11968.4	7077.95	10943.2	10612.4	9995.55	10965.1	10760.6	11623.2	9632	8971.39	9893.8	10752.2	10941.2	9803.39	10848.8	9307.51	10782.6	10731.6	9101.18	12272.9	9801.36	8960.61	10746.7	9918.83	10176.2	10330.6	10537.9	1	1.19933	1.10694	1.13566	1.15289	1.17603	0	1.13236	0.607495	0.770662	0.868561
Q16584	MAP3K11	Mitogen-activated protein kinase kinase kinase 11	1217.1	791.478	1109.11	1346.24	1267.73	1136.61	1000.52	1020.97	833.711	1162.2	1234.99	974.241	740.034	817.688	781.251	1100	811.152	1269.11	1445.08	1193.01	554.115	1440.44	763.96	961.119	828.696	810.84	704.66	1038	457.779	617.698	1146.33	1030.8	909.64	1163.67	909.665	725.795	1	0.899217	0.793522	1.01512	0.793544	0.633145	1	0.725277	0.437168	1.04122	0.437228
Q9H3S4	TPK1	Thiamin pyrophosphokinase 1	12982.5	13148.5	14642.6	13676.3	12618	12493.7	13016.7	14406.8	12566.3	13018	12719.6	14089.1	9760.99	10931.7	12593.9	13655.4	12641.8	12757.5	12031.7	12379.8	13878.3	13768.4	13787.3	14667.7	12537.5	14938.5	15270.5	15306.9	15209.2	14255.7	13413.6	13100.3	12019.1	12693.2	13727.8	14996.1	1	0.976648	0.896038	0.946299	1.02343	1.11798	0	-0.19793	-0.881159	-0.455157	0.198586
Q06481	APLP2	Amyloid beta precursor like protein 2	34897.2	31227.7	32885.7	28040.6	27997.2	35120.4	34494.6	38438.5	33110.2	40143.9	30238.6	32339.2	27435	30499.3	38560.3	30194.2	29445	28982.9	29403.3	31250.5	35834.7	33023.6	28800.6	39544.1	36680.4	34678.5	40232.7	31222.5	43578.1	35366.2	31009.7	36261.5	31814.5	29855.2	34776.7	37015.6	1	1.16936	1.02595	0.962769	1.12148	1.19368	0	0.874442	0.134	-0.192229	0.62721
P61218	POLR2F	DNA-directed RNA polymerases I, II, and III subunit RPABC2	48667.7	45867.7	46859.6	44742.6	38741	50177.1	47364	51399.2	46735.6	55879.2	44869.1	48750.2	45374	57341	55220.3	50715.8	47336.4	40617.8	37381.1	56173.5	51983.6	52498.9	47990.5	59020.7	44138.2	50201	55213.4	47584.2	59213.1	47347.3	44975.7	50311	50310.9	46444.9	51126.4	51911.8	1	1.11863	1.11862	1.03267	1.13676	1.15422	0	0.769212	0.769197	0.211818	0.886767
P54578	USP14	Ubiquitin carboxyl-terminal hydrolase 14	397820	367625	380031	375578	362298	405763	367176	378468	350404	331843	391821	365384	368008	356284	383989	378894	378645	369951	378912	374769	373030	369654	393450	419784	334663	364342	355546	347793	356437	347122	376671	366731	373097	376234	378116	354248	1	0.973612	0.990514	0.998842	1.00384	0.940472	1	0.556708	0.840648	0.980545	1.06448
Q00403	GTF2B	Transcription initiation factor IIB	20692.5	21550.2	20203.6	21029.6	25022.1	20027	23511.4	19063.6	24663.6	25628.8	24599.3	24563.3	21168.4	25880.8	22449.8	25440.1	25707.4	30450.7	25959.3	27671.5	25900.9	26941.6	24902.1	27845.1	24955.2	25334	22934.3	24713.5	23454.9	29002.8	21699.6	22578.9	23732.3	27045.8	26109	25087.9	1	1.04052	1.09368	1.24637	1.2032	1.15615	0	0.25951	0.599926	1.57784	1.30135
Q24JP5	TMEM132A	Transmembrane protein 132A	40927.8	38914.8	34990.9	34944.3	34624.3	36805.4	33589.1	37716.2	35245.6	35943.8	35269.9	37676.2	36871	32535	36059.4	35366.1	40837.1	35739.8	32654.9	33481.1	37451.1	36488.4	38937.1	38394.4	37166.3	38132.6	40446	40134.6	47105.5	44056.9	36880.4	35860	35682.3	35615.8	37687.5	41975.1	1	0.972332	0.967513	0.96571	1.02188	1.13814	0	-0.200291	-0.235174	-0.248226	0.158403
Q86YS3	RAB11FIP4	Rab11 family-interacting protein 4	50404	80249.3	104199	98603.1	79776.5	89573.4	88652.4	105138	92042.6	100695	86823.4	100144	99392.8	88736.2	95470.6	96372	92378.3	89856.4	94877.4	93916	103282	103880	96942.3	104430	85481.4	96815.9	103097	111570	124893	106189	82646.3	95220.3	94113.5	93480	98803.1	108513	1	1.15214	1.13875	1.13109	1.19549	1.31298	0	0.486106	0.443317	0.418828	0.624616
Q9UKJ3	GPATCH8	G patch domain-containing protein 8	21910.6	21100.1	18039.8	18677	18093.1	19925	18172.1	22682	18988	21471.2	19325.7	20810.1	19822.9	18386.5	19637.3	19262.2	21250.8	17121.9	21419	21540.6	24044.4	23082.7	19707.5	22732.4	20051.2	21693.4	22000.5	20939.7	24824.7	22342.5	19564.1	20247.7	19596.5	20118.9	21923.6	22360.2	1	1.03494	1.00166	1.02836	1.1206	1.14292	0	0.24447	0.0115821	0.198419	0.843878
O14776	TCERG1	Transcription elongation regulator 1	136314	127552	139355	132729	126356	147729	132061	147729	135616	153392	134900	140362	136372	135501	158244	138036	129284	123131	127748	153527	146944	140042	137726	158999	146770	144058	144988	132305	156497	145232	132461	143305	141076	134345	146096	144616	1	1.08187	1.06503	1.01422	1.10293	1.09176	0	0.892167	0.708731	0.155001	1.12176
P49588	AARS1	Alanine--tRNA ligase, cytoplasmic	423990	412789	404028	427868	452499	473041	461719	465946	452674	487990	447820	431657	462947	497719	471530	435709	450071	500330	440843	508357	455026	459262	437215	492818	483412	468361	428142	453480	454612	486255	424235	468274	462334	467062	465547	458170	1	1.10381	1.08981	1.10095	1.09738	1.07999	0	1.29774	1.12272	1.26203	1.21738
Q6UXK5	LRRN1	Leucine-rich repeat neuronal protein 1	3032.69	2247.03	676.531	290.514	1435.76	5494.43	2305.99	2032.68	633.648	2030.71	468.785	1240.19	4913.32	4630.51	4096.93	5299.56	4366.33	1354.81	666.985	3840.7	5245.07	5225.13	858.214	884.241	1166.64	4524.49	3665.31	1077.67	6344.39	6465.33	1536.51	2499.49	3069.95	3105.68	2675.86	4415.44	1	1.62674	1.99801	2.02126	1.74152	2.87369	0	0.334494	0.532643	0.545053	0.395755
Q9HCE1	MOV10	Helicase MOV-10	27424.1	26952.1	25172.1	25314	27011.6	30636.1	29298.3	27951.2	28698.9	32415.8	28061.8	28137.7	29572.2	31807.7	29679.7	27945.9	30553.2	34527.6	28279	33060.9	26976.9	30294.9	28310.1	26995.3	29709.3	28094.5	28446	28229.1	29153.7	33521.6	26374.8	29800	29451.8	30873.3	28457.3	29489	1	1.12987	1.11667	1.17056	1.07896	1.11808	0	1.09988	0.988062	1.44452	0.668712
Q8IZC6	COL27A1	Collagen alpha-1(XXVII) chain	596.956	1302.86	554.766	1210.78	515.558	363.565	430.498	379.894	67.6831	373.953	1180.03	540.679	332.868	61.8716	222.22	281.538	168.493	261.64	571.03	1246.27	143.473	448.02	202.004	324.225	380.159	276.65	603.788	173.514	312.294	15.9068	836.183	323.119	467.534	505.795	299.576	276.431	1	0.386421	0.559129	0.604885	0.358266	0.330586	1	0.0834085	0.341407	0.40976	0.0413495
Q96F24	NRBF2	Nuclear receptor-binding factor 2	12114.6	13722.7	15470.1	10115.1	12278.2	12729.7	12519.3	14749.1	13540.9	15033.7	12553.3	14807.5	15362.8	14308.8	13466.4	13549.4	15129.4	11323.9	15053.4	14600.9	14486.7	15408.8	14098.8	14727.5	14005.1	14196.5	14329.2	15981.3	16336.6	15553.1	12740.2	13714.5	14099.8	13931.4	14545.4	15279.3	1	1.07648	1.10672	1.0935	1.14169	1.1993	0	0.383737	0.53545	0.46915	0.71094
Q96BY7	ATG2B	Autophagy-related protein 2 homolog B	17887.6	16372.1	19854.5	13232.7	15922.6	12862.8	14184.4	16255.2	14265.3	13045.6	14321.6	14777.4	12315.8	12966	14813.7	14255.7	15058.1	14795	14811.9	16377.2	18157.6	17900.1	12379.5	17777.5	13257.3	11195.5	11969	13516.8	15192.7	15039.3	16653.9	14122.6	13838.9	15059.6	15894.4	13382.7	1	0.848009	0.830972	0.904268	0.954396	0.803576	1	0.22621	0.139474	0.512627	0.767828
Q9BRQ0	PYGO2	Pygopus homolog 2	25183.3	31397.1	31991.5	32892.9	29810.8	33691.3	29528.8	33261	28139.7	29961.2	31822.2	33607	30768.5	27960.7	33349.7	28372.5	29018.6	24431.1	28598.6	30666.7	33273	29886.1	31784.9	33948.8	34774.2	32357.3	35441.2	35127.3	43263.1	32915.1	30255.1	30916.4	31501.6	28217.5	32733.4	35820.8	1	1.02186	1.0412	0.932652	1.08191	1.18396	0	0.118814	0.223958	-0.366105	0.445278
Q8WVZ9	KBTBD7	Kelch repeat and BTB domain-containing protein 7	7265.89	8719.11	6679.34	6853.62	6933.11	8299.29	7990.85	8549.11	6959.84	8593.65	7822.52	8310.22	7669.03	6378.12	8039.94	8836.24	7182.62	8172.33	6599.86	7698.85	7033.17	7494.62	8491.2	7611.46	7062.05	7135.9	9299.14	8923.2	9310.29	9690.9	7290.21	8078.55	7643.97	7697.98	7538.5	8871.88	1	1.10814	1.04852	1.05593	1.03406	1.21696	0	0.498418	0.223657	0.257806	0.156976
Q9UHK6	AMACR	Alpha-methylacyl-CoA racemase	64756	55986.8	56491	54065.3	49279.6	49689.4	53732.5	52990.6	51548.7	47911.3	50681	53785.7	56047.4	47987.2	49709.2	57103.1	60454.1	52666	59442.1	59007.3	60172.1	59536.6	60487.1	66678.9	53500.4	61052.7	58487.6	68043.7	72337.9	62487.8	56115.7	51174.5	51642.1	57734.5	60075	64482	1	0.911945	0.920279	1.02885	1.07056	1.14909	0	-0.590619	-0.534725	0.19349	0.473246
P51114	FXR1	RNA-binding protein FXR1	24422.8	26620.5	24805.4	25682.7	36311	33003.7	33093.6	28923.3	34367.9	29974.2	36437.3	33736.2	34254.1	35147.1	30701.7	31586.7	34630.1	38895.2	30551.1	30969.2	30610.6	30667.6	31184.3	28911.9	35002.9	33388	30891.4	33131.2	30626.6	37115.1	27568.5	31872.5	34055.3	33326.5	31275.4	33030.5	1	1.15612	1.2353	1.20886	1.13446	1.19812	0	0.788005	1.18763	1.05419	0.678686
P36551	CPOX	Oxygen-dependent coproporphyrinogen-III oxidase, mitochondrial	217068	214071	223076	194905	203587	205761	188369	224670	213083	205034	193081	210645	208786	189665	221314	217054	221266	188530	201473	214947	219928	219314	201592	237366	215271	229515	230181	214726	269810	230844	210541	207383	204698	208654	218694	235015	1	0.985001	0.972247	0.991036	1.03872	1.11624	0	-0.129036	-0.238751	-0.077116	0.333126
Q02833	RASSF7	Ras association domain-containing protein 7	4026.07	5404.82	3063.94	3209.97	5809.36	4103.34	9179.92	8068.36	9768.58	6517.51	8441.15	6925.51	9408.13	6836.45	9395	3399.5	5279.91	4680.28	8303.92	9589.62	7638.81	4792.53	6757.97	9964.95	10145.6	4823.64	8993.36	4705.93	11933.3	6307.76	4302.83	7527.54	8201.25	6250.65	7859.98	7352.8	1	1.74944	1.90601	1.45268	1.8267	1.70883	0	1.05729	1.27818	0.638634	1.16629
Q13627	DYRK1A	Dual specificity tyrosine-phosphorylation-regulated kinase 1A	10295.2	20165.8	8386.87	13684.6	24197.8	12625.6	32122.2	33849.8	29368.7	31691.7	27047.1	32677.2	33280.6	24899.9	32257.4	14856.8	18858.7	10699.2	13565.1	10029	10574.7	16149.6	9948.39	31444	36293.6	21447.6	29655.1	14777.2	39903.1	26298.8	15346	27931.6	30032.4	13601.8	20882.1	26416.3	1	1.82012	1.95702	0.886338	1.36075	1.72138	0	1.13688	1.32665	-0.157563	0.500079
Q9NWZ8	GEMIN8	Gem-associated protein 8	6509.08	6141.09	5908.03	4846.89	4981.68	6514.31	7686.96	6647.41	6921.8	8036.08	6520.1	6995.09	7248.29	6211.56	7806.6	7821.12	5977.9	5891.59	6168.29	7034.54	6407.78	7319.09	6832.25	7628.48	8040.13	6744.81	6640.12	7009.52	6895.32	6549.86	5677.35	7161.31	6956.33	6578.69	7245.55	6767.92	1	1.26138	1.22528	1.15876	1.27622	1.19209	0	1.36072	1.17275	0.826482	1.43795
Q9ULE4	FAM184B	Protein FAM184B	6996.35	6516.43	3461.45	5700.71	6090.17	8826.71	8950.01	9142.11	12404.8	6988.05	7637.57	10878.2	8616.86	523.529	8612.32	8922.65	5524.3	8610.43	9702.61	1121.96	9518.67	11191.4	7707.85	8909.13	7875.79	6646.24	6337.18	17368	10495.9	8473.59	5753.02	9262.34	7253.7	6776.39	9040.57	9864.2	1	1.61	1.26085	1.17788	1.57145	1.71461	0	0.853605	0.365026	0.248924	0.799661
P52435;Q9H1A7	POLR2J;POLR2J3	DNA-directed RNA polymerase II subunit RPB11-a;DNA-directed RNA polymerase II subunit RPB11-b2	13624.7	13102.2	12923.6	13355	15536.7	15239.8	16087.9	14359.7	15336.7	16155.1	18931.2	15254.7	14101.6	16008.5	15072.9	15514	15462.9	17805.3	14902.7	17667.6	15831.3	18397	16383.3	13827.1	15464.8	16539.7	14908.5	14868.4	14853.7	17103.3	13708.4	15435.8	15873.8	16270.5	15980.7	15654.7	1	1.12601	1.15796	1.1869	1.16575	1.14198	0	0.88754	1.11255	1.3164	1.16748
Q9BQG2	NUDT12	NAD-capped RNA hydrolase NUDT12	9915.67	10088.8	7597.66	10548.3	10732.9	9081.38	10657.5	11006.5	9571.87	11014.7	10375.5	11256.1	11614.5	10922.4	11278.6	10530.5	11635.9	10484.2	9400.26	11042.9	10227.3	10352.4	10945.9	12568.6	10367.6	11816.4	11290.8	11102.9	11336.1	12269.6	9776.68	10266.4	11089.4	10618.8	10892.4	11563.2	1	1.05009	1.13427	1.08613	1.11412	1.18273	0	0.274125	0.734817	0.471361	0.62452
Q7Z333	SETX	Probable helicase senataxin	32260.4	34659.9	32056.9	27920.2	32611.1	34971.7	33757.8	38150.5	33619.4	38706.5	31851.8	34627.6	30997.5	33511.2	32476.3	32527.9	29412.3	29223.6	26537.6	36868.1	34474	36742.3	33479.8	37626.4	37638.7	32693.6	37110.9	36604.2	41272.4	34565.5	31901.7	35841.2	32692.9	30913.9	35992.3	36449.3	1	1.12349	1.0248	0.969035	1.12822	1.14255	0	0.866265	0.173968	-0.217223	0.89949
P06396	GSN	Gelsolin	764036	725491	722387	743892	761750	851505	828458	817277	840805	797394	762849	782648	774858	805203	804035	743151	766189	837276	769818	809462	784533	786126	753000	800201	790413	775784	756274	783756	813183	834644	743511	827088	785919	785179	782855	792728	1	1.11241	1.05704	1.05604	1.05292	1.0662	0	1.69813	0.861651	0.846625	0.799391
O00399	DCTN6	Dynactin subunit 6	38674.3	41339.6	37498.6	37424.4	39401.1	41701.5	42593.9	43842	45402.4	40553.1	41330.1	42754.9	42471.1	39795.8	44795.8	41299.4	42150.3	39148.5	34925.8	34832.5	41086.5	39706.3	40256.4	36206.5	39645.6	40727.2	44874.6	42785.9	43705.4	40189.9	38867.6	42818.6	42229.5	38471.3	39380.2	42456.6	1	1.10165	1.0865	0.989804	1.01319	1.09234	0	1.10086	0.936735	-0.110418	0.14284
Q99447	PCYT2	Ethanolamine-phosphate cytidylyltransferase	143690	154076	136872	143510	154510	164207	156518	156029	160935	169647	154627	155604	151813	152819	158265	144403	155092	165872	146937	160057	153347	156128	156593	161259	165569	160822	148336	155471	165514	166714	146531	161467	154626	154472	158579	159371	1	1.10193	1.05524	1.05419	1.08222	1.08762	0	1.16325	0.630407	0.618455	0.938309
Q9GZP4	PITHD1	PITH domain-containing protein 1	120777	115316	124775	109160	112885	120113	105644	131980	119883	124979	109298	121027	115671	101755	128704	113439	110216	105304	114004	118551	128910	128365	115802	125279	111112	122199	130657	124208	146888	123193	116582	120520	115291	112303	121893	129429	1	1.03377	0.988922	0.96329	1.04556	1.11019	0	0.306506	-0.100539	-0.33315	0.413423
P49750	YLPM1	YLP motif-containing protein 1	51321.2	55599.4	44853.7	50896.3	46197.4	54218.3	48956.9	51710.7	48345.5	51791.7	47737.6	53073.5	52771.7	45799.7	55543.6	52331.5	53077.5	48531.1	49410.4	46139.7	49328.3	47469.6	50000.6	51949.8	52345	54701.1	59252.2	54057.6	63478	51692.1	49773.6	51004.6	50985.2	49898.1	50218.7	56636.2	1	1.02473	1.02434	1.0025	1.00894	1.13788	0	0.179385	0.176557	0.018139	0.0648578
Q92526	CCT6B	T-complex protein 1 subunit zeta-2	528517	509505	471087	474454	475490	470985	489557	494811	451024	461262	467034	467829	489816	459040	511132	475327	464233	486519	466669	496225	502079	473490	507775	514214	491318	471671	441287	453363	474912	406086	491811	473528	478970	477795	497775	449464	1	0.962826	0.973892	0.971501	1.01213	0.913896	1	0.568263	0.69678	0.66902	1.14085
Q5VWZ2	LYPLAL1	Lysophospholipase-like protein 1	112662	115439	82082.8	107700	107155	129531	114436	128270	123237	119866	124570	124410	124091	122111	109947	114130	107328	121654	79289.4	125719	95162.9	91663.7	108462	138205	115350	110369	130237	124274	122619	120911	105008	123068	121026	109624	109769	121682	1	1.17199	1.15254	1.04396	1.04534	1.15879	0	1.08314	0.960638	0.276854	0.285522
P16989	YBX3	Y-box-binding protein 3	156355	146299	141634	143493	133184	169034	156305	169753	161173	172046	142751	149421	148344	157878	158527	141987	153479	141729	135351	152286	152407	141639	142417	158733	165198	159136	163393	149023	155842	153978	144193	165662	151384	144966	152079	156274	1	1.14889	1.04987	1.00536	1.05469	1.08379	0	1.77705	0.595228	0.0640069	0.652715
P39023	RPL3	Large ribosomal subunit protein uL3	47045.1	48343.5	43414.2	53976.9	59964.8	59057	57874.6	47353.5	57143.3	56166.5	62689.6	53879.8	54686.5	72022.7	59697.8	53368.1	61410	71169.3	54427.4	65209.2	55885.9	61126.7	55366.2	57965.5	72589.1	59084.3	53276.1	63861.4	54299.8	66507.8	50548.9	55519	60595.3	61116.8	60586.7	59405.9	1	1.09832	1.19875	1.20906	1.19858	1.17522	0	0.561146	1.13429	1.19317	1.13332
Q9H0U9	TSPYL1	Testis-specific Y-encoded-like protein 1	18808.6	17573.8	18280.6	17503.3	16098.6	19211.7	16905.4	20412.8	18178.2	20256.5	16852.7	17695	17136.3	17351.9	18736	16661	15905.5	16431	18497.8	17855.3	19270.6	17918	17749.6	19780.5	18902.5	18267.9	19936.4	19412.9	23523.5	20032.1	17653	18992.9	17554.4	17070.1	18724.3	20234.6	1	1.0759	0.994416	0.966983	1.06069	1.14624	0	0.519037	-0.0381832	-0.225775	0.414974
P61247	RPS3A	Small ribosomal subunit protein eS1	279394	277650	259948	309965	326839	332386	364103	324730	345729	340281	346906	328334	323465	364626	328421	332717	338544	385874	327437	368295	307520	338584	333194	303003	345845	358142	285660	337621	324641	415224	290759	341446	338350	350573	325629	344258	1	1.17432	1.16368	1.20572	1.11993	1.18399	0	0.947442	0.889577	1.11806	0.651796
P35637	FUS	RNA-binding protein FUS	1.01866e+06	938556	990381	941265	899446	971013	920470	1025630	956466	997238	891279	896614	908168	891145	972816	927807	939675	858196	872490	979756	944572	912951	926891	962140	967661	991294	1.02253e+06	1.01676e+06	1.10834e+06	1.02748e+06	957662	974163	912004	915585	942843	1.03328e+06	1	1.01723	0.952324	0.956063	0.984526	1.07896	0	0.218216	-0.603772	-0.556421	-0.195962
P13637	ATP1A3	Sodium/potassium-transporting ATPase subunit alpha-3	13453.1	3617.58	8918.35	17332.6	8369.7	9367.92	7349.3	9147.72	12620.1	7045.41	8288.36	9909.48	9756.53	473.732	1033.92	12240.8	12095.1	7724.03	8858.36	911.154	10151.4	4513.77	9847.82	314.958	11534.1	743.095	10211	799.607	366.372	9293.88	10338.3	9106.1	5892.4	8365.88	7272.42	4282.78	1	0.880815	0.569961	0.809215	0.703447	0.414265	1	0.79652	0.265812	0.674282	0.493707
Q8IY31	IFT20	Intraflagellar transport protein 20 homolog	4345.81	4365.12	3600.43	3762.89	3171.46	2367.69	3963.93	3391.39	3351.67	2688.27	4407.99	3083.73	3933.34	2683.93	3701.46	3389.98	3144.02	3083.36	3774.08	4853.94	7090.91	3734.14	2299.27	4430.96	4436.13	3813.69	3261.89	2539.79	2518.42	2584.21	3849.14	3152.59	3562.09	3649.07	4398.28	2943.6	1	0.819037	0.925425	0.948023	1.14267	0.764743	1	0.230787	0.683006	0.779064	1.60643
O75116	ROCK2	Rho-associated protein kinase 2	91948.1	94072.6	97629.2	87518.4	90636.4	101200	98183	109409	102822	101667	90327.9	104842	107297	96020.2	103405	97904.4	99296.5	105912	87664.1	96363.4	102851	107159	101308	111807	97109.2	99240	103117	99396.5	107414	92948.9	92360.9	102656	100379	97428.1	104047	100423	1	1.11147	1.08681	1.05486	1.12652	1.08729	0	1.27693	0.99444	0.628486	1.44942
Q9BY42	RTF2	Replication termination factor 2	192939	189865	202645	192114	184190	237365	206841	228573	217127	210049	185376	198627	196259	197577	224860	186040	185443	191220	194206	194165	200531	196320	193077	227358	210680	203877	211724	202581	220551	195697	192350	219991	200540	190215	205593	206886	1	1.1437	1.04258	0.988897	1.06885	1.07557	0	1.90158	0.563414	-0.146924	0.911055
Q76NI1	KNDC1	Kinase non-catalytic C-lobe domain-containing protein 1	499119	474823	496117	427372	416003	482068	384300	505950	423468	472054	460310	477829	474437	457578	468639	480660	490158	419552	438868	578330	537448	490332	446654	629675	573812	532412	559222	478998	625196	477972	462687	453568	467759	481514	535584	534760	1	0.980291	1.01096	1.04069	1.15755	1.15577	0	-0.126525	0.0703698	0.26122	1.01143
P04062	GBA1	Lysosomal acid glucosylceramidase	50958.4	45692	47195.6	48187.8	53750.2	55360	55760.4	52597.6	53958.1	54742.5	48668.5	52958.9	51913.4	56624.2	46901.9	49450.4	52443.2	56999.8	51593.8	54128.6	49355.9	49896.7	45660.3	53738.6	53717.4	56246.8	50614.1	53516.9	53681.6	56177.9	49156.8	54483.7	51413.4	52923.2	50473.8	54047.5	1	1.10837	1.0459	1.07662	1.02679	1.09949	0	1.08921	0.461401	0.770111	0.269277
Q99575	POP1	Ribonucleases P/MRP protein subunit POP1	77687.1	74191	75813.5	78152.1	74547.8	76585.7	75435.3	79841	80473.3	81474	75398.2	77787.3	76665.9	73818.9	85460.2	78609.4	77927.2	75221.9	74233.7	80684.4	79922.5	76341.7	77833.3	81341.2	73831.8	78689	82075.2	78988.4	93593.5	83436.4	76078.3	78761.9	77826.1	77335.3	77854.1	83356.5	1	1.03527	1.02297	1.01652	1.02334	1.09567	0	0.368713	0.240142	0.172712	0.243988
P05783	KRT18	Keratin, type I cytoskeletal 18	9389263	9383611	9751464	8462794	8410569	10157882	9355348	10959217	9832836	10955540	8702958	9443879	9203000	8856864	11165249	9118414	8549767	8427227	8497170	9374612	10159230	9704912	9100255	10140964	9907567	9709940	10409477	9392083	11584684	9880621	9.07954e+06	1.02522e+07	9474390	8793438	9.80259e+06	10195361	1	1.12915	1.04349	0.968489	1.07963	1.12289	0	1.05091	0.353865	-0.256405	0.647994
P55072	VCP	Transitional endoplasmic reticulum ATPase	13746706	12482908	13006149	12488300	12503300	11483943	10739138	13273143	11815434	12520557	12094646	13138272	12192367	11987198	12747052	13238228	13958033	11533932	12804762	13466432	13497352	13627203	13053189	14364681	12215006	13409257	13871793	13450465	15477838	14066515	1.28455e+07	11966443	12431907	1.30003e+07	1.33515e+07	1.40552e+07	1	0.931569	0.967805	1.01205	1.03939	1.09417	0	-0.72665	-0.341874	0.127969	0.418296
P49720	PSMB3	Proteasome subunit beta type-3	591763	574031	629641	544675	559890	571490	552835	661880	589960	610283	560355	595263	583617	540204	635061	620325	612874	536537	591562	606634	613459	620108	633804	600798	631314	616245	659849	622784	670358	589416	580000	597290	582900	593586	619897	631730	1	1.02981	1.005	1.02342	1.06879	1.08919	0	0.33423	0.0560548	0.262637	0.771239
O75817	POP7	Ribonuclease P protein subunit p20	27909.2	24005.2	24924.8	26940.1	24241	22781	23406.2	22748.6	24349.3	20632.9	21672.6	21461.6	21011.8	20484	24186.6	23201.7	21770.7	21444.8	23524.9	21289.9	23939.3	23502.1	22871.1	25579.2	22467.9	23245.6	24052	22908.1	22559.2	22728.9	25604.1	22783.6	21763.3	22246.4	23671.9	23098.8	1	0.889843	0.849994	0.868861	0.924538	0.902152	1	-0.125795	-0.533048	-0.340229	0.228782
O96013	PAK4	Serine/threonine-protein kinase PAK 4	15676.3	14922	13785.4	15768.5	14473.2	17364.1	17775.6	15746.7	12730.1	16578.8	15664.6	16285.7	17952.8	20752.8	16295.7	14897.3	16133.4	17195.6	14706.6	17145	13362.7	14945	17244	18063.4	21185.9	16662.6	15709.5	16603.9	16501.2	19330.4	14925.1	16039.1	17390.3	16015.6	16960.2	16961.5	1	1.07464	1.16517	1.07306	1.13635	1.13644	0	0.547017	1.21058	0.535498	0.999358
O75367	MACROH2A1	Core histone macro-H2A.1	25143	25588.7	26840.4	26473.7	32092.5	27823.3	31805	27476.3	28909.3	32096	32641.8	32104.9	31705.1	33161.3	28522.2	26195.4	33135.4	38138.9	31339.9	32181.7	30582.3	32804.1	28859	29830.2	32235.1	32331	27779.8	31105.2	30969.9	32997.1	27227.7	29622	31627.1	32198.3	30862.1	31036.6	1	1.08794	1.16158	1.18256	1.13349	1.13989	0	0.628603	1.15502	1.30499	0.954197
Q07157	TJP1	Tight junction protein ZO-1	126088	121725	119502	126781	121472	121206	110965	124036	119209	133130	124798	128813	124484	134198	128908	122515	131348	123326	112838	120686	127328	116249	115545	123331	118838	131223	132618	122093	150315	140858	123114	121709	128240	122143	120258	135421	1	0.98859	1.04164	0.992114	0.976807	1.09997	0	-0.114129	0.416531	-0.0788847	-0.231992
Q9Y3D8	AK6	Adenylate kinase isoenzyme 6	12234.2	15509.2	15589.9	10835.4	17835.4	17443.9	18249.8	16750.7	19098.7	19972.6	16760.2	18059.1	15563.9	18678.9	21755.2	16499.5	13968	20371.8	16784.5	16475.6	16130.7	14591	18663.3	16599.3	16018.4	18123	15554.5	21422.1	16962.3	18492.1	14400.8	18303.2	18163.5	16819.9	16400.5	18110.8	1	1.27098	1.26128	1.16798	1.13886	1.25762	0	1.05185	1.0142	0.65204	0.539008
P31930	UQCRC1	Cytochrome b-c1 complex subunit 1, mitochondrial	27767.8	31324	26362.2	33378.5	38252.7	39331.5	39432.1	39208.4	38349	44027.5	37079.6	34877.6	36197.7	39727.9	41363.8	33284.8	32955.7	42960.9	29643.4	37170.1	35330.3	37375.5	33867	36386.6	43445.7	36577.9	34108.9	37334.7	35562.3	42382.5	31417	40069.7	37849.3	35203	37281	37193.2	1	1.27541	1.20474	1.12051	1.18665	1.18386	0	1.49799	1.11358	0.655434	1.0152
Q9BRF8	CPPED1	Serine/threonine-protein phosphatase CPPED1	65702.6	64651.2	67795.7	56134.1	58596	66116	61160.7	68279.6	67468.6	68993.8	60734.5	63091.3	63864.1	62155	64030.3	64273.5	63923.1	57382.4	60076.4	63262.9	67755.4	63970.9	62393.3	65414.3	65506	66731.6	72834.7	66662.9	78982.2	67120.8	62575.9	66403.7	62775	61783.6	65008	70466.4	1	1.06117	1.00318	0.987339	1.03887	1.1261	0	0.485115	0.0252333	-0.10041	0.308223
P04075	ALDOA	Fructose-bisphosphate aldolase A	11570447	11506518	12285275	11307180	10499217	10960662	10173269	12091458	10772848	12122122	10873368	11405360	11325050	10844060	11895592	11131026	10898586	10214342	11001545	11645145	12437144	11840414	11267292	12372023	11061231	11940502	12538184	12491960	14586186	12215162	1.14337e+07	1.12241e+07	11268686	1.09781e+07	1.17956e+07	1.27544e+07	1	0.981663	0.985565	0.960153	1.03165	1.11551	0	-0.158749	-0.124968	-0.344975	0.274022
Q9NZN3	EHD3	EH domain-containing protein 3	110261	106771	109139	111594	110889	106125	110445	109800	104433	99790.2	114792	108025	106412	111726	101498	104879	110830	120609	108951	115826	105414	112317	109819	104833	107671	106776	95134.6	103308	92204.2	107327	109731	106119	108491	112219	108011	100950	1	0.96708	0.988701	1.02267	0.984325	0.919976	1	0.588628	0.858805	1.28332	0.804122
P06703	S100A6	Protein S100-A6	2.60507e+06	2.39664e+06	2302194	2191385	1.92379e+06	2.14018e+06	2.02902e+06	2.52304e+06	1.97923e+06	2.53343e+06	1.97346e+06	2.17574e+06	2196262	1.94408e+06	2816303	2274416	2.27536e+06	1731782	2.05146e+06	2.15559e+06	2.3906e+06	2.52087e+06	1.96531e+06	2433137	2391114	2353001	2.69326e+06	2.59746e+06	3.19963e+06	2550084	2.28382e+06	2.24098e+06	2.22117e+06	2.09772e+06	2.34021e+06	2.67869e+06	1	0.981244	0.97257	0.918516	1.02469	1.1729	0	-0.108477	-0.158646	-0.471277	0.142811
P35080	PFN2	Profilin-2	55014.8	48589	51287.5	55843.3	48552.7	50826.2	50980.7	46050.2	52589.2	40083	39772.8	44103.8	48025.2	40494.2	44485.7	45644.3	47511.7	49771.7	52813.4	50475.7	50193.3	46973.3	44965.9	52811.1	44019	48332.3	47450.2	49630.4	44526.7	39233.4	51857.5	48105.9	43376.4	49243.4	47792.5	45834.6	1	0.927655	0.836453	0.94959	0.921613	0.883858	1	0.377102	-0.408156	0.565966	0.32508
P83881;Q969Q0	RPL36A;RPL36AL	Large ribosomal subunit protein eL42;Ribosomal protein eL42-like	196195	224974	220960	234765	277446	308255	291690	286458	304548	326280	236228	233133	269146	268817	293959	239722	226317	296160	257289	282304	260999	276726	249495	264721	285262	267851	252284	257149	252983	289983	230868	303446	260257	260359	267441	264050	1	1.31437	1.1273	1.12774	1.15841	1.14373	0	2.18728	0.885683	0.888749	1.10218
Q8IYB3	SRRM1	Serine/arginine repetitive matrix protein 1	46783.4	45844.7	43523.4	43491.2	52437.8	54836.3	57567.8	55273.5	55880.6	61215.9	52962.9	48453.2	47187.2	55759.2	55705.5	49071.1	49516.7	58614.6	49642.5	53886.3	47105.5	52250.6	47765.6	51974	55953.5	55698.6	49747.7	51271.2	47759.5	55820.9	46416.1	56954.8	52013.6	52146.2	51009.8	52059.6	1	1.22705	1.12059	1.12345	1.09897	1.12158	0	1.86741	0.991856	1.01536	0.813986
Q9Y676	MRPS18B	Small ribosomal subunit protein mS40	40997.8	43320.5	41324.5	47498.7	53539.9	61822.8	58661.3	54129.1	55014.1	60467.7	50955.9	51594.6	51376.2	62384.3	57734.8	47915.7	47871.6	63226.3	51704.2	65089.3	48629.9	56047.6	52979.3	56880.3	63715.2	52330.4	48749.2	50451.9	50255.6	62373.7	45336.3	58019	54809.2	55161.4	55650.5	52832.2	1	1.27975	1.20895	1.21672	1.2275	1.16534	0	1.69196	1.26375	1.31074	1.37598
Q9BU61	NDUFAF3	NADH dehydrogenase [ubiquinone] 1 alpha subcomplex assembly factor 3	8340	9867.78	9345.21	11879.5	10476.4	9163.49	10224.6	9792.42	9720.02	11214.1	8750.47	10352.2	8174.1	10383.6	8702.3	7447.64	6188.87	9083.99	9764.54	7937.6	8785.94	6911.7	10001.4	10142.9	9713.58	8388.75	9241.8	6767.35	8691.14	7683.63	9981.78	10022.9	9272.53	8084.53	9111.1	8154.53	1	1.00412	0.928946	0.809928	0.912773	0.816942	1	1.02252	0.611848	-0.0383132	0.523501
P29373	CRABP2	Cellular retinoic acid-binding protein 2	246269	227913	235223	217352	221173	236723	221942	249172	240257	232461	214052	236802	231766	205759	239864	227004	233486	208994	217241	215123	233600	233056	231325	242531	215561	234507	253973	251718	284143	240951	229586	236111	225649	220369	231215	253058	1	1.02842	0.982851	0.959856	1.00709	1.10224	0	0.277994	-0.167735	-0.392645	0.0693908
Q14258	TRIM25	E3 ubiquitin/ISG15 ligase TRIM25	140952	136256	142142	149232	150582	176006	164706	168178	168914	163444	144955	149205	146623	162944	169044	140533	141971	150774	153752	158980	142005	149361	144721	165791	165202	148293	150099	153305	161318	159656	143833	168250	154554	149202	153416	154534	1	1.16976	1.07454	1.03733	1.06663	1.0744	0	2.28164	1.00188	0.501721	0.895521
Q86TB9	PATL1	Protein PAT1 homolog 1	16322	14569.7	15286.3	15805.5	18108	16890.2	17854.4	17368.4	15845.4	18242.9	16928.3	17355.2	15757.5	18125	20211.7	17759	17577.6	18027.6	17318.4	19697.5	17278.1	18169.2	16203.5	16935.3	17649.2	16890.6	18482.9	17319.3	18638.8	19486.3	16018.3	17240.2	17675.5	18076	17247.1	18163.6	1	1.07628	1.10346	1.12846	1.07671	1.13393	0	0.569593	0.772502	0.959183	0.572773
P33993	MCM7	DNA replication licensing factor MCM7	112223	116153	111861	123069	145904	123767	131550	99336	126480	137568	138459	129413	131177	143363	128456	129003	140952	167516	142325	159980	128025	136693	128352	131755	149014	143702	126875	144483	129278	163266	121842	123740	134173	147955	134768	141521	1	1.01558	1.10121	1.21432	1.10609	1.16151	0	0.0964546	0.62663	1.32696	0.656849
Q96I59	NARS2	Asparaginyl-tRNA synthetase	13318.5	13472.7	19290.7	13650.7	17063.6	15645	32535.2	26179	25766.9	15197.3	28035.3	26525.7	14501.7	16405	35246.4	28833.5	17779.2	25462	24109.7	29017.1	14865.2	19367.2	15426.7	13095.5	14508.3	30180	13812.8	32180.9	25238.4	17006	15359.2	23064.7	24142.8	25040.3	15452.6	23683.6	1	1.50168	1.57188	1.63031	1.00608	1.54198	0	0.925647	1.05516	1.16298	0.0112118
P52657	GTF2A2	Transcription initiation factor IIA subunit 2	49672.2	49608.4	51825.5	43151.9	47858.4	51363	46425.1	56931.4	48364.9	55391.4	44631.4	49569.5	46683	44486.5	51690.7	45229.2	50256.1	43311.5	45640.7	45240.9	51722.1	47428.9	47564.6	49301.8	49027.4	49841.8	52347.9	53465.3	63306.3	55327.9	48423.2	51695.2	47412.2	45935.7	49009	54857.8	1	1.06757	0.979121	0.948628	1.0121	1.13288	0	0.508488	-0.157124	-0.386596	0.0910287
Q13315	ATM	Serine-protein kinase ATM	13637.3	12011.2	12156	13492.9	11623.3	11390.8	11821.9	12436.1	12416.2	9816.49	11982.8	11274.2	12932.1	11176.2	12756.9	10852.7	12013.6	10818.1	12221.9	11458.7	12169.6	11329.2	10666.2	12193.5	11657.7	10871.8	11298.7	11107.8	10785.9	11568.3	12584.1	11576.3	12024.5	11473	11603.2	11126.5	1	0.919915	0.955527	0.911704	0.922054	0.884169	1	0.308605	0.61605	0.237716	0.327072
Q8IUZ5	PHYKPL	5-phosphohydroxy-L-lysine phospho-lyase	11751	13678.8	11381.2	10032.3	11221.8	12806.6	12957	12648.7	11180.8	11178.9	11780.6	14370.4	11506.1	12292.1	12105.6	12352.7	13291	13345.3	9740.93	11494.6	12621.8	10586.4	12393.6	12455.4	10550.2	13683.1	14847.8	11701.4	14227	13927.5	11613	12154.4	12411	12044.9	11721.5	13677.4	1	1.04662	1.06871	1.03719	1.00934	1.17776	0	0.262244	0.386528	0.209207	0.0525503
L0R819	ASDURF	ASNSD1 upstream open reading frame protein	22016	22742.3	22271	21078.1	20420.6	20089.5	20138	22665.5	20716	22897.7	21242.6	24041	22206.3	20736	20904.5	22699.9	23662.4	20533.1	19307.8	21283	24416.1	19159.5	21716.9	23671.6	21650.3	22250.4	25766.7	22482.7	27755.1	24869.5	21705.6	21301.3	21826	21497.2	22122.9	24624.9	1	0.981376	1.00555	0.990401	1.01922	1.13449	0	-0.138474	0.0412633	-0.0713699	0.142937
P07910	HNRNPC	Heterogeneous nuclear ribonucleoproteins C1/C2	173591	163166	157410	187654	179620	187053	190793	183957	186463	201940	182075	183673	185794	205216	189010	168957	189464	213896	172900	194731	161475	189928	180339	176053	204294	195498	178742	177406	196157	208567	172288	190041	189154	187990	182418	191274	1	1.10304	1.09789	1.09114	1.0588	1.1102	0	0.935093	0.888323	0.827017	0.533543
Q9UID6	ZNF639	Zinc finger protein 639	3677.09	3841.68	3760.57	3951.59	3983.46	2962.83	1886.91	1745.35	2328.12	2971.34	3744.98	4963.44	2007.17	2478.63	277.472	4492.6	5428.74	4908.43	5346.25	5770.88	4206.14	5574.54	4146.81	5125.34	3653.55	2746.7	2160.68	3576.37	3825.56	1769.04	3842.88	2378.91	2694.34	5189.38	4541.27	2815.67	1	0.619044	0.701124	1.35039	1.18174	0.732698	1	-0.425191	-0.11812	2.31083	1.6799
P83876	TXNL4A	Thioredoxin-like protein 4A	40788.9	36084.4	34104.8	38314.2	33493.9	30374.2	30212.2	30584.5	30614.5	30726.5	30625.9	33444.1	29722.5	31665.5	32207.1	29124.5	33434.2	27957.8	33332.3	32246.4	34852.4	32388.4	31531.7	32113.6	34195.4	30913.5	33608.4	32318.7	35154.9	30599.6	36557.3	30502.4	31533	31219.1	33016.3	32519	1	0.834372	0.862565	0.853977	0.903139	0.889537	1	-0.499394	-0.244174	-0.321916	0.123141
O75400	PRPF40A	Pre-mRNA-processing factor 40 homolog A	119247	116434	122237	115461	116910	131640	121034	135527	122768	130496	115545	119285	113639	122114	136996	117079	119670	112791	122713	134161	127572	125455	111075	128734	138635	125422	129513	118806	132259	125143	118058	128293	121516	121283	126294	126229	1	1.0867	1.02929	1.02732	1.06977	1.06921	0	1.25266	0.423218	0.394685	1.00804
P60660	MYL6	Myosin light polypeptide 6	1.89316e+06	1824407	1.90884e+06	1.66338e+06	1.62529e+06	1.84527e+06	1.62419e+06	1.94713e+06	1.81743e+06	1.92329e+06	1.72493e+06	1.87877e+06	1.77331e+06	1.56541e+06	1920862	1908797	1.78538e+06	1.62052e+06	1.66627e+06	1.82154e+06	1.93667e+06	1.75304e+06	1.76592e+06	1.87319e+06	1.90309e+06	1.87979e+06	1959658	1.87026e+06	2260168	1.98897e+06	1.78302e+06	1.83146e+06	1.77266e+06	1.7605e+06	1.84638e+06	1.99177e+06	1	1.02717	0.99419	0.987373	1.03554	1.11708	0	0.232081	-0.0496219	-0.10785	0.30355
P00390	GSR	Glutathione reductase, mitochondrial	1.78856e+06	1.67681e+06	1.73939e+06	1.59166e+06	1.61465e+06	1.77609e+06	1500636	1.84733e+06	1.64123e+06	1694658	1.56204e+06	1.68127e+06	1.62327e+06	1.58986e+06	1.75238e+06	1.62095e+06	1.68105e+06	1.56008e+06	1.54867e+06	1743788	1.75993e+06	1.73547e+06	1.5884e+06	1910018	1.66441e+06	1.76387e+06	1.83368e+06	1.75591e+06	2.14678e+06	1.8239e+06	1.68221e+06	1.69199e+06	1.64176e+06	1.63091e+06	1.73165e+06	1.86483e+06	1	1.00581	0.975955	0.969501	1.02939	1.10856	0	0.0535259	-0.221495	-0.280953	0.270701
Q8WU76	SCFD2	Sec1 family domain-containing protein 2	2272.62	2229.72	2375.37	3042.6	2443.96	1946.48	1394.4	2161.08	2574.77	2256.15	1756.55	1408.29	1938.78	1545.35	2199.8	1631.01	1362.15	1861.78	825.806	2123.66	1404.05	1532.01	2401.25	1115.26	2018.53	2251.55	1442.86	1683.55	1318.13	2322.14	2472.85	2066.58	1769.76	1560.88	1694.22	1803.65	1	0.835705	0.715674	0.631207	0.685128	0.729379	1	0.392898	-0.0506429	-0.362764	-0.163515
Q9Y3C1	NOP16	Nucleolar protein 16	8183.39	8126.81	7917.6	8226.45	8166.3	7890.81	7284.99	9608.99	9153.89	8798.05	8412.06	7961.22	7597.93	8177.28	8686.06	8180.89	8431.22	8269.43	8031.73	9273.86	8599.47	8616.83	8330.67	8303.68	8760.85	8635.29	8940.45	9041.12	9935.33	9299.11	8124.11	8547.35	8166.91	8437.43	8522.3	9170.26	1	1.0521	1.00527	1.03857	1.04901	1.12877	0	0.404566	0.0409135	0.299494	0.380622
O75475	PSIP1	PC4 and SFRS1-interacting protein	3464.49	4781.29	4985.12	4139.15	4380.5	4898.03	4305.2	5303.21	5272.46	6016.84	4366.27	4191.56	4908.86	4098.49	4659.58	5463.62	4773.84	4654.19	3482.17	4593.42	5804.43	5566.2	4359.03	5176.02	4081.9	4835.02	5337.25	5568.75	5115.63	5572.52	4350.11	5159.15	4444.95	4593.45	4997.52	5285.83	1	1.18598	1.0218	1.05594	1.14883	1.2151	0	0.864613	0.101357	0.260055	0.69188
Q8TEK3	DOT1L	Histone-lysine N-methyltransferase, H3 lysine-79 specific	474.677	2244.25	2819.78	1143.19	3068.98	3423.8	3640.81	3581.34	3100.67	3817.95	4037.04	3980.51	3133.16	2218.03	1876.08	2601.15	2621.13	2930.89	3800.35	2837.8	3808.12	3391.26	3570.8	3405.63	2972.35	3939.89	2661.15	2715.04	4646.71	4353.22	1950.17	3512.92	3048.96	2958.27	3429.63	3663.2	1	1.80133	1.56343	1.51692	1.75863	1.8784	0	0.912269	0.641432	0.588485	0.863651
Q8N8J7	FAM241A	Uncharacterized protein FAM241A	1431.57	680.383	1801.91	1080.85	1823.06	2848.86	1927.59	1397.52	1844.72	2070.72	1723.3	1284.55	1856.67	1502.14	1953.54	1712.16	1469.61	2590.72	1749.58	2427.81	1978.95	2293.56	2063.83	1963.25	2226.96	2616.2	2173.7	2528.86	2144.52	1402.64	1363.56	2017.88	1664.04	1989.97	2105.31	2173.18	1	1.47987	1.22037	1.4594	1.54398	1.59376	0	0.808184	0.371137	0.773711	0.916166
Q9H3Z4	DNAJC5	DnaJ homolog subfamily C member 5	1291.69	1003.41	1402.32	1073.38	2040.82	1537.76	1996.71	1716.03	1238.32	1383.83	2359	1900.7	2187.77	1995.4	2169.41	1521.79	1702.16	2272.98	2122.46	2171.35	2273.3	1515.68	1821.18	1428.34	2036.21	1997.77	1842.8	1619.43	1828.28	2294.69	1362.32	1574.53	2122.45	1958.15	1814.94	1916.59	1	1.15577	1.55797	1.43736	1.33224	1.40686	0	0.382861	1.37141	1.07497	0.816604
P22570	FDXR	NADPH:adrenodoxin oxidoreductase, mitochondrial	27252.6	29256.4	18308.8	24120	34779	31684.6	48119.7	28274	28346.3	34961.2	31720.2	29768.7	33484.7	35470.9	32521.2	34441.3	34380	40829.7	29516.9	39998	32804.7	32555.1	26518.6	28891.6	33430.5	35053.3	27856.5	35252	33274	41386.8	26743.3	34277.2	32593.1	35833.2	30840.1	34564.5	1	1.28171	1.21874	1.33989	1.15319	1.29245	0	0.96326	0.747942	1.16221	0.523804
P61106	RAB14	Ras-related protein Rab-14	87247.3	86508.4	88466.9	82798.7	101775	95479.1	95439.4	90688.6	88638.7	95086.9	113057	103969	91681.4	105918	89697.2	101256	105471	102610	89381.6	87106.9	99046.6	96202	113000	94739.5	82684.4	98365.5	94927.6	108559	97180.6	95769.5	89359.3	93066.6	100865	97165.2	97134.5	98960.5	1	1.04149	1.12875	1.08735	1.08701	1.10745	0	0.386126	1.19832	0.813011	0.809818
P10074	ZBTB48	Telomere zinc finger-associated protein	2.33567e+06	2.17886e+06	2.30824e+06	2.19664e+06	1.83698e+06	2.01788e+06	1.72229e+06	2.18848e+06	1.85867e+06	2.26146e+06	2006909	2205583	2.07733e+06	1.96974e+06	2.17402e+06	2.19289e+06	2.26776e+06	1.9641e+06	2.04319e+06	2059915	2.38093e+06	2.28006e+06	2259083	2.36375e+06	2.35579e+06	2.34664e+06	2.48305e+06	2.31159e+06	3045073	2.40317e+06	2.17128e+06	2.00976e+06	2.08672e+06	2.10557e+06	2.32792e+06	2.51791e+06	1	0.925611	0.961055	0.969738	1.07214	1.15964	0	-0.465973	-0.24395	-0.18956	0.451908
O15287	FANCG	Fanconi anemia group G protein	275.656	647.373	259.522	696.605	261.986	192.946	578.984	335.816	248.758	869.444	596.796	304.348	40.6764	379.199	827.603	91.8395	267.805	99.9959	461.03	406.945	932.07	102.228	457.195	393.475	598.257	1203.6	512.502	1118.54	476.281	1039.48	428.229	445.19	429.725	265.523	496.645	870.081	1	1.03961	1.00349	0.62005	1.15977	2.03181	0	0.038386	0.00338556	-0.368235	0.15484
Q14241	ELOA	Elongin-A	16982	25334.2	26235.7	19473.5	26155	25475.9	19171.4	24678.2	28292.6	28625.8	24977.8	25758.4	25228.8	25992.4	27994.3	19384.6	26215.2	26309.4	27253.4	23893.5	28879.7	28728.6	26950.4	33233.8	28422.8	27840.8	25311.3	28336.5	29381.7	27756.2	22836	25248.8	25990.3	24611.2	29243.1	27725.3	1	1.10565	1.13813	1.07774	1.28057	1.2141	0	0.493474	0.645144	0.363082	1.31043
Q6DN90	IQSEC1	IQ motif and SEC7 domain-containing protein 1	3873.66	9690.1	9802.54	8701.51	10895.2	11422.8	11804.8	13304.6	11940.8	11185.5	10907.8	12126.7	10488	11123.3	11787.2	9293.15	11605.7	10495.3	11080.9	11271.5	12659.7	10254.2	12256.1	9568.72	12547.6	11499.4	12624.5	11410.8	13850.7	12045.5	8592.6	11931.7	11286.6	10749.3	11457.3	12286.2	1	1.3886	1.31352	1.251	1.33339	1.42986	0	0.904029	0.729367	0.583905	0.775578
Q14894	CRYM	Ketimine reductase mu-crystallin	83687.3	77554.7	81450	61791.2	74588.5	74858.9	68794.7	79158.1	73363.5	79040.8	72940.2	80825.5	77881.9	70472.6	84591.1	78168.7	79390.9	68300.2	71980.8	81752.8	77239.8	81212.4	69193.3	89308.9	74109.7	81378.5	89682.7	81705.7	95512.2	85885.6	75814.4	75043.2	77342.3	75918.7	78212.8	86832.9	1	0.989828	1.02015	1.00138	1.03164	1.14534	0	-0.0699877	0.138665	0.00946584	0.217673
P30613	PKLR	Pyruvate kinase PKLR	23342.5	12246.1	36799.8	18633.5	13319.2	18814.6	13101.8	13070.2	14162.7	15096.1	17645	24861.5	15321.8	17001.7	10290.2	13773.8	13353.9	16919.6	31645.1	15079.8	16868.8	19735.5	17516.7	22137.3	18344.8	18344.4	13369.4	11239	7768.92	7899	20868.2	14849.1	17024	18154.4	18920.6	11724.1	1	0.711565	0.815788	0.869955	0.906672	0.561819	1	0.341746	0.579599	0.703217	0.78701
Q9UJX4	ANAPC5	Anaphase-promoting complex subunit 5	14513.9	14012.5	13705	12471.6	14743	14900	14588.5	15056	13841.6	14006.5	15144.3	12620.7	13808.9	13862.7	13378.7	12941	13494.6	14341.4	13434.9	14459.8	14643.2	12758.2	13979.3	13366.3	13408.6	13191.5	12624.4	11893.6	12026.3	11894.3	13889.2	14478.5	13763.1	13734.3	13631.1	12326	1	1.04243	0.990919	0.988848	0.981419	0.887454	1	1.37699	0.919317	0.900916	0.8349
Q9UQ35	SRRM2	Serine/arginine repetitive matrix protein 2	407656	383525	387268	373478	364994	406272	365977	428157	382310	417725	368266	400938	374646	374459	415228	372882	360438	343087	384416	396420	419322	391511	373224	452462	392282	403057	429306	390950	485355	411294	383384	400088	386707	371449	405760	423992	1	1.04357	1.00867	0.968868	1.05836	1.10592	0	0.411347	0.0818313	-0.293919	0.551019
Q96Q11	TRNT1	CCA tRNA nucleotidyltransferase 1, mitochondrial	39536.6	64522.1	50261.7	38616.2	67561	56361	68686.9	67641.9	69564.2	62031.3	70022.2	59363.4	61604.2	60113.8	62253.6	66930.1	67824.1	71283.1	56365.5	58799.1	63212.3	66235	65865.2	65004.5	66890.9	69018.1	62900.8	66943.8	65971.8	62678.2	52099.5	64857.1	62671.5	64240.4	65441.6	65502.5	1	1.24487	1.20292	1.23303	1.25609	1.25726	0	0.951842	0.788774	0.905832	0.995453
Q9BU68	PRR15L	Proline-rich protein 15-like protein	6242.14	6547.41	4346.2	7149.01	5790.66	3750.57	4878.7	4475.6	4148.44	1566.23	5946.64	6800.37	4941.18	2353.49	5385.76	5579.18	4609.77	4047.51	4684.86	3199.28	5910.08	4697.38	6510.42	3375.93	4956.26	5860.22	4615.51	3488.6	3979.85	4659.28	6015.08	3763.91	5085.49	4424.12	5090.01	4520.69	1	0.625746	0.845456	0.735505	0.846209	0.751559	1	-0.506414	0.377945	-0.0646211	0.380973
Q4G176	ACSF3	Malonate--CoA ligase ACSF3, mitochondrial	19366.5	19579.9	18749.4	23553.8	26520.3	21984.9	25672.7	24018.9	26417.3	30346.5	26132.8	22809.3	25222.8	27954.7	24656.4	23690.3	24109.8	29432.9	25019.2	31207.6	24135.4	22979.2	27259.9	24286.8	29303	25344.1	22676.1	26967.7	24355.6	31070.6	21554	25688.1	25355.2	26692	25592.8	26082.8	1	1.1918	1.17636	1.23838	1.18738	1.21012	0	0.912837	0.839335	1.1345	0.891808
Q9NTG7	SIRT3	NAD-dependent protein deacetylase sirtuin-3, mitochondrial	15879.8	17217.9	16418.5	14398.3	14705.5	15004.6	16008.1	14674.7	16400.7	14627.1	16904.5	16418.9	16537.5	14934.5	14396.2	16194.1	14887.2	17524.8	16401.5	15063.7	16077.9	16366.1	14769.5	16088.3	13963.3	14545.4	13356.4	14091.7	14655.5	12242.1	15724	15343	15838.3	16014.3	15453	13778.2	1	0.975772	1.00727	1.01846	0.982766	0.876254	1	0.804208	1.05877	1.14918	0.860732
Q9Y6M7	SLC4A7	Sodium bicarbonate cotransporter 3	13341.4	11193.4	14267	10233.7	13382.3	15564.4	12752.6	12088	10785.2	14342.3	8626.37	12322.9	9828.76	15743.1	13017.3	9984.56	7507.78	12263.9	12622.9	13349.2	19921.5	17608	13791.9	17156.9	17146	9832.1	8536.89	8576.74	12862.7	10183.6	12483.6	13106.5	11907.7	11145.7	17124.8	9998.4	1	1.0499	0.953868	0.892828	1.37179	0.800925	1	1.25066	0.768267	0.461653	2.86759
P62829	RPL23	Large ribosomal subunit protein uL14	128981	129420	115834	135162	153160	138087	143069	134839	143348	154813	154536	144305	144046	163764	145145	140865	137057	169867	142716	165962	145547	147809	144852	140644	149197	157037	136209	148168	143960	170201	132511	142831	150359	151293	145610	151115	1	1.07788	1.13469	1.14174	1.09885	1.14039	0	0.554727	0.959392	1.0096	0.704084
O43143	DHX15	ATP-dependent RNA helicase DHX15	334438	323425	363104	285361	318051	345816	326256	333971	323684	313597	322843	333048	330002	355109	346910	327781	327948	325942	317059	333523	316426	348975	337697	366032	336125	357773	350258	354097	384995	345469	324876	328665	337582	326450	341051	358519	1	1.01166	1.03911	1.00485	1.04979	1.10356	0	0.112625	0.377685	0.0468011	0.480787
Q9BQG0	MYBBP1A	Myb-binding protein 1A	17460	16615.7	18004.5	13814.9	17223.2	19071	11797.1	15714.9	9926.14	14875.7	18412.7	14526.2	21625.2	15906.9	14786	17152.6	16160.1	18776.5	13326.3	12772.9	17847.3	17686.8	14030	14673	14956.1	18454	19476.3	17893.8	19485	19254.1	16623.7	14277	17051.4	15637.7	15838.6	18912.6	1	0.858833	1.02573	0.940687	0.952776	1.13769	0	-1.02523	0.186865	-0.430759	-0.342969
P67809	YBX1	Y-box-binding protein 1	556102	542833	564610	543149	497358	608806	565554	592860	561610	601171	527326	564795	548102	560710	611345	538152	541891	529392	551252	571457	554074	540802	528570	552737	560384	588239	612580	564254	573840	563304	540810	586000	562456	546429	547314	580443	1	1.08356	1.04002	1.01039	1.01203	1.07328	0	1.1402	0.54614	0.14176	0.164086
P30566	ADSL	Adenylosuccinate lyase	175648	164033	174694	157717	169342	173999	152151	173261	156536	176561	168437	182618	165363	163171	197376	176271	172554	161017	156784	169638	181146	177019	180043	200280	170413	176325	183710	175861	207729	178674	168287	166501	175393	167253	181780	184460	1	0.98939	1.04223	0.993856	1.08018	1.0961	0	-0.110404	0.439394	-0.0639327	0.834316
P24593	IGFBP5	Insulin-like growth factor-binding protein 5	55338	50184.4	48043.5	55008.4	49504.1	58544.1	52840.2	59013.7	54535.1	61034.3	50553.2	51479.4	50892.1	53995.5	59251.4	48475.5	49005.6	50279.7	49840.8	57095.3	56159.1	53005	51977	59109.8	57880.3	55808	55976.2	53573.7	60546.8	57171.7	51615.7	57193.5	53234.3	50939.4	55626.2	56615.3	1	1.10806	1.03136	0.986898	1.0777	1.09686	0	1.11565	0.323754	-0.13527	0.802177
P61962	DCAF7	DDB1- and CUL4-associated factor 7	90056.5	91989.8	90370.3	91280.3	93264.6	108904	100605	111086	103612	103664	93860.5	98124.1	97673.8	98748.7	102498	90778.7	85345.6	93381.2	94462	96255.9	103141	98535.3	94815.6	108253	103925	99551.9	94108.7	92385.6	107569	100740	91392.3	105574	98181	92044.7	101734	98871.2	1	1.15518	1.07428	1.00714	1.11316	1.08183	0	1.89626	0.90772	0.0872342	1.38277
Q6P1R4	DUS1L	tRNA-dihydrouridine(16/17) synthase [NAD(P)(+)]-like	4222.97	4568.35	4363.37	5038.18	6337.07	6176.1	6879.29	4235.53	5660.09	7049.77	7362.04	5918.1	6220.26	6925.88	5655.75	6294.05	5721.18	8107.89	5069.91	7162.64	5469.1	6148.63	6597.91	4745.52	6832.36	7195.5	5371.2	6195.27	5228.53	8126.48	4905.99	6000.16	6416.41	6471.13	5958.7	6423.4	1	1.22303	1.30787	1.31903	1.21458	1.3093	0	0.721078	0.995394	1.03146	0.693759
Q8WV28	BLNK	B-cell linker protein	12007.5	14370.5	35546.8	10318.1	20722.8	24377.8	29087.8	18419.7	23681.4	25160.9	24431.6	18634.1	16232.6	23892.8	24984.1	18380.6	19743.7	19731	29796.6	26552	20907.8	27813.3	23719.9	29120.4	22058.2	32596.5	30017.3	29286.8	34879.7	18179	18593.1	24145.5	21635.1	22840.8	24723.9	28991.9	1	1.29863	1.1636	1.22845	1.32974	1.55928	0	0.53395	0.292528	0.408477	0.589573
Q15170	TCEAL1	Transcription elongation factor A protein-like 1	10583.2	8978.51	8377.43	11556.6	6968.36	8501.4	6429.58	7274.78	8087.57	6199.76	7504.04	8197.07	6455.17	6082.05	10118.7	6342.76	6879.7	6587.56	10180.4	5688.24	7051.76	6373.26	7545.75	7511.79	6294.11	8359.17	7038.19	7146.31	7142.35	4283.44	9292.82	7298.62	7671.4	7135.74	6955.33	6793.89	1	0.785404	0.825519	0.767876	0.748463	0.73109	1	0.201977	0.351153	0.136797	0.0646045
P11172	UMPS	Uridine 5'-monophosphate synthase	75358.2	123235	74995	74775.3	73719.1	111356	115891	112101	78919.4	80910.7	122832	76996	77202	111802	115682	112769	132516	125724	86559.5	117247	126368	79722.4	78766	118461	113027	118427	114866	76418.8	125889	125154	84416.5	99835.5	100903	114963	103269	112151	1	1.18265	1.1953	1.36186	1.22332	1.32854	0	0.555954	0.594442	1.10141	0.679747
P25789	PSMA4	Proteasome subunit alpha type-4	1.26589e+06	1.09681e+06	1.23645e+06	1.16384e+06	1.06169e+06	1.15906e+06	1.06215e+06	1.20618e+06	1.04033e+06	1.13846e+06	1.06424e+06	1.18748e+06	1.18714e+06	1.10997e+06	1.12666e+06	1.12239e+06	1.15545e+06	1120064	1126651	1.16487e+06	1.27043e+06	1.27006e+06	1.14332e+06	1.27615e+06	1.25761e+06	1223323	1240778	1.29025e+06	1.48491e+06	1.26487e+06	1164938	1.12123e+06	1.1351e+06	1.13789e+06	1.24351e+06	1.30083e+06	1	0.962485	0.974387	0.976779	1.06745	1.11665	0	-0.321612	-0.219573	-0.199072	0.57823
Q8IZX4	TAF1L	Transcription initiation factor TFIID subunit 1-like	743.624	1040.18	841.436	773.669	1895.3	1671.29	1883.71	1328.82	1586.69	1278.34	1879.48	1599.39	1305.28	1928.08	1172.56	1518.68	2014.37	1684.3	1734.36	1755.59	996.319	2344.94	1855.73	1309.99	3669.72	1806.42	1508.77	1683.08	1214.51	1728.74	1058.84	1549.77	1576.96	1741.46	2035.34	1588.3	1	1.46365	1.48933	1.64469	1.92223	1.50004	0	0.927223	0.978575	1.28927	1.84432
O75051	PLXNA2	Plexin-A2	3998.44	2313.98	4198.15	2300.2	3877.73	1450.26	2835.24	3316.54	1321.09	1616.91	2513.46	2052.72	3119.92	2832.47	5704.57	2810.66	2918.64	1210.32	5008.05	1261.72	1526.01	2119.92	5452.78	1593.74	1736.79	1235.87	2159.26	2447.51	640.859	2912.42	3337.7	2108.01	3244.63	2641.88	2485.85	1879.18	1	0.631575	0.972116	0.791527	0.744779	0.563018	1	0.156888	0.936189	0.522926	0.415946
Q9ULM3	YEATS2	YEATS domain-containing protein 2	8142.13	9162.69	8468	7869.08	8964.9	10061.2	9457.84	10628.5	10142.9	11144.5	8785.83	10217	8923.78	9232.17	11356.5	9005.79	10567.1	9059.96	6690.85	9209.82	9659.06	10006.7	9673.85	10019	9798.08	9305.22	10224.4	9318.81	11188.2	9208.1	8521.36	10287	9703.06	8906.7	9831.34	9848.94	1	1.2072	1.13867	1.04522	1.15373	1.15579	0	1.32995	0.890116	0.290257	0.986743
Q86WR0	CCDC25	Coiled-coil domain-containing protein 25	16833.1	21749.8	18788.6	18761.8	22953.5	22551.5	24042.2	23508.4	25018.5	24316.5	23795.4	22705.1	22587.2	24180.7	23364.3	25907.8	24363.2	24716.5	19189.2	20607.3	23756.4	22370.8	22721.4	23154.9	24379.2	24641.5	19091	23770.2	27284.5	24486.3	19817.4	23887.4	23326.5	22956.8	23276.6	23854.7	1	1.20538	1.17708	1.15842	1.17455	1.20373	0	1.00811	0.869179	0.777601	0.856799
Q05655	PRKCD	Protein kinase C delta type	37567.9	22838.2	18779.7	23038.9	20224.4	11396.5	16516.5	21296.7	15668.2	12951.1	18127.7	7674.41	40032.7	19312.5	16795.9	11666.5	21283.4	14284.8	9393.32	10681.1	7111.71	18492.5	11150.8	12005	16790.2	17737.6	17949.8	16602.1	19053.9	19376.8	24489.8	15565.8	20388.7	13461.8	13110.1	18144	1	0.635603	0.832535	0.54969	0.535326	0.740881	1	-0.406291	0.353716	-0.737847	-0.793281
O14683	TP53I11	Tumor protein p53-inducible protein 11	19242	18492.9	17160.3	14568.9	15982.8	18395.1	17607.1	18620.7	17449.9	18793.5	16208.4	17317.5	17004.4	16664.3	20074.3	17982.2	18498.8	15995.2	15488.5	15580.1	19102.2	17814.6	17770.2	17405.5	17392	18221.6	20417.6	18833.5	23047.1	19285.4	17089.4	18173.3	17453.8	16708.9	17896.9	19961	1	1.06342	1.02132	0.977739	1.04725	1.16804	0	0.377439	0.126893	-0.132478	0.281204
Q68CP9	ARID2	AT-rich interactive domain-containing protein 2	11033.6	11956.2	17326.2	8395.97	17743.3	18794.7	16124.2	18982.7	19633.9	23341.1	16597.9	17396	13659.1	14090.1	18391.5	15053.1	16825.9	15617.6	15373.8	20479	18260	14812.6	14178.7	19707.4	14431.3	15120.8	17298	17187.1	20198.8	18872.8	13291.1	19375.3	16026.9	16669.9	16278	17735.5	1	1.45777	1.20584	1.25422	1.22473	1.33439	0	1.36896	0.615568	0.760233	0.672064
Q9UER7	DAXX	Death domain-associated protein 6	26027.8	189563	109252	24154.1	200572	100323	168509	104760	203522	191986	198948	209250	165422	200179	148575	184042	221889	184477	41550.4	84748.2	187990	140214	198941	142009	121823	204647	214069	175996	237556	188556	109914	153820	184475	143341	158195	204165	1	1.39946	1.67836	1.30412	1.43926	1.8575	0	0.465843	0.791089	0.354663	0.512265
P14735	IDE	Insulin-degrading enzyme	156362	162753	165781	118674	139938	161513	157134	163207	150056	162742	132198	165089	163963	157505	170427	161860	166548	133506	162390	177837	173153	146176	165123	187608	168431	165928	165780	167564	179826	170604	148702	158931	157836	160428	168098	169940	1	1.06879	1.06143	1.07886	1.13044	1.14283	0	0.481621	0.430096	0.552142	0.913271
Q9UBQ0	VPS29	Vacuolar protein sorting-associated protein 29	228376	236001	226891	224038	201049	264791	238734	256900	252487	259281	214496	234367	228108	222052	243374	231378	219654	201546	195052	212170	230265	228036	213594	256260	253835	228166	252908	233974	264742	242931	223271	254439	228479	211960	236398	244544	1	1.1396	1.02333	0.94934	1.05879	1.09528	0	1.46513	0.244826	-0.531699	0.617071
Q5SW79	CEP170	Centrosomal protein of 170 kDa	71959.1	70407.4	71594.3	66333.8	67730	72934.3	63115	76467.9	67431.7	77126.3	66304.7	69578.6	64561.2	68236.1	76241.5	71547.5	71548.7	63537.4	64302.6	68580.7	76968.5	76244.4	66009.2	74933.5	74208.7	70169.8	80966.1	76885.1	88986.5	72062	69604.9	71415.1	68984.4	67903.4	73672.9	77813.9	1	1.02601	0.991085	0.975554	1.05844	1.11794	0	0.220507	-0.0755888	-0.207278	0.495549
Q08170	SRSF4	Serine/arginine-rich splicing factor 4	7935.79	7489.89	7979.86	7981.05	9033.88	5830.03	5856.17	5349.42	8082.51	6375.73	7017.85	5604.9	6169.13	6875.84	5237.83	6586.81	7111.43	7270.73	7876.14	8855.46	5777.77	7846.01	6970.58	6682.22	7168.66	6298.02	6874.03	7459.61	5877.28	7768.88	8084.09	6298.77	6181.11	7540.12	6889.05	6855.57	1	0.779156	0.764601	0.93271	0.852173	0.848031	1	-0.453219	-0.548996	0.557211	0.0272532
P05387	RPLP2	Large ribosomal subunit protein P2	184302	163760	175493	176462	176573	181187	178895	176190	172049	186575	181249	180337	184207	189848	188103	180609	196190	191246	179736	197963	175537	177423	176191	179559	168310	193555	184445	178014	187333	205388	175318	178979	184749	189149	175404	189747	1	1.02088	1.05379	1.07889	1.00049	1.0823	0	0.253728	0.653592	0.958543	0.00595478
P13995	MTHFD2	Bifunctional methylenetetrahydrofolate dehydrogenase/cyclohydrolase, mitochondrial	70905.8	67892	58792.9	68418.7	75166.7	63137.4	75117.7	67046.9	64161.6	73226.8	75472.1	62937	72378.6	77850.2	69479.6	67869.8	79044.9	88311	77291.5	75037.3	69615.5	68725.5	64994.4	61244.7	69044	77536.7	75881.9	79586.5	69169.4	78871.6	68235.2	68538.1	71623.5	77510.9	66724.8	76209.2	1	1.00444	1.04966	1.13594	0.977865	1.11686	0	0.0379785	0.424914	1.16324	-0.189416
Q9UIQ6	LNPEP	Leucyl-cystinyl aminopeptidase	10170	12731	10296.2	11381.8	12367.8	10787.4	11261.2	10407.4	10306.8	9501.36	12046.6	12180.4	11109.2	11162.6	12200.5	13570.9	13426	12072.6	9520.74	11055.8	12627.8	12480.6	10928.6	13387.7	9404.32	11833.7	13716.9	13682.1	13788.9	12727.8	11389.4	10452.8	11739.8	11929.2	11765.8	13149.9	1	0.917773	1.03077	1.0474	1.03305	1.15458	0	-0.531947	0.199078	0.306643	0.213824
Q6PJG2	MIDEAS	Mitotic deacetylase-associated SANT domain protein	46852.2	45204.8	43516.3	40420.4	40869.9	48727.3	42363.6	50778.1	45073.6	48977.5	41908.1	45587.1	43955.3	40346.2	48811.1	45684.4	44222.8	41159.1	42027.8	43716.5	45841.3	45484.4	42455	45652.4	42302	44549.1	48764.8	46576.5	54077.3	47551.9	43372.7	47184	44121.6	43362.1	44347	48303.9	1	1.08787	1.01727	0.999755	1.02246	1.11369	0	0.772901	0.151861	-0.002151	0.197582
Q7Z309	PABIR2	PABIR family member 2	5477.31	6578.94	4841.89	3618.23	6375.46	7059.18	5035.79	5814.56	5457.78	5194.28	5806.41	7466.59	6669.99	5809.47	5336.35	6560.5	7092.27	5560.25	4904.47	3061.78	6812.59	6051.35	6121.21	5948.11	4819.34	6642.05	7006.05	6473.65	6752.66	7204.1	5378.37	5712.32	6217.76	5435.86	5950.52	6815.7	1	1.06209	1.15607	1.01069	1.10638	1.26724	0	0.232342	0.583995	0.0399985	0.398066
P10636	MAPT	Microtubule-associated protein tau	202711	289548	186080	288856	282545	292187	267345	262546	253462	265568	238132	297878	271263	239946	220933	260102	295624	245488	168964	182130	207879	180071	231214	229771	217878	308353	298757	292907	320507	290861	249948	268222	253630	230461	213363	302277	1	1.07311	1.01473	0.922037	0.853628	1.20936	0	0.349206	0.0703676	-0.372389	-0.699147
O76080	ZFAND5	AN1-type zinc finger protein 5	16508.9	14913.3	16143.6	17557.8	12546.8	13711.1	14361	16570.9	15390.8	13537.1	8253.25	15102.4	15059.6	15255.7	19993.4	15714.3	16258.6	20008.7	13197	15203.3	17640.9	20944.3	17153.7	19704	14389.8	15184	19999.5	18831.7	20350.9	18547.2	15534.1	14714.2	14732.9	16076.4	17966.6	18582.7	1	0.94722	0.948423	1.03491	1.15659	1.19625	0	-0.268941	-0.262813	0.17788	0.797906
Q15382	RHEB	GTP-binding protein Rheb	14380.8	20041.5	18268.7	20439.1	23411	22990.8	22836.8	20677.7	22703.9	25385.8	24250.7	25956.8	24227.5	27447.8	17918.4	25519.3	23047.9	29065	29495	25305.5	25753.4	23858.7	28006.6	20831	27350.4	20461.8	21005.3	24537.3	26028.1	27254.3	19308.2	22919	23960.3	26486.5	25160	23857.4	1	1.18701	1.24094	1.37177	1.30307	1.23561	0	0.793727	1.02262	1.57795	1.28635
Q9UGU0	TCF20	Transcription factor 20	10624.3	14280.2	12878.9	11464.8	12757.3	12731	13331.5	14517.6	13013.2	12959.3	12067.8	12691.2	14147.1	13151.3	15025.2	12826.4	13514.9	12205.7	9554.97	13102.6	13916.2	12865.5	12396.5	13937.5	13857.1	14463.7	14588.7	13609.9	15933.2	13358.3	12401.1	13310.5	13416.5	12240.9	13394.6	14390.8	1	1.07333	1.08188	0.987081	1.08011	1.16044	0	0.457063	0.510356	-0.0805223	0.499314
O95238	SPDEF	SAM pointed domain-containing Ets transcription factor	25489.3	23554.6	19271.6	22655.2	21131.8	25630.8	21633.5	28360.7	23973.1	29438.1	24435.9	23231.5	21666.4	21286	24250.2	22133.6	20810.2	22723.5	21367	24089.2	22078	22777.9	24349.5	21917.6	26211.8	25362	25997.3	24990.5	26481.1	23957.6	22420.5	25807.2	22974	22224.7	23467	25357.7	1	1.15105	1.02469	0.991266	1.04667	1.13101	0	1.15304	0.188444	-0.0666698	0.356281
P07305	H1-0	Histone H1.0	32137.7	33496.8	31100.4	34903.3	33612.7	36577.9	34888.8	36928.1	36464.9	39536.9	36585.9	33848.9	34050.3	33213.9	30886.5	34775.5	35297.9	35480	33006.9	33146.3	34352.5	32551.1	37159.6	32150.9	35839.3	35545.1	33836.6	36638.7	36345.4	37337.4	33050.2	36879.3	33717.1	34341.3	34410.7	35940.6	1	1.11586	1.02018	1.03907	1.04116	1.08746	0	1.32474	0.230729	0.446687	0.470685
P07711	CTSL	Procathepsin L	18555.8	16564.2	20171.1	13469.3	18505.6	16348.9	18143.7	19024.7	18219.8	19266.7	16222.9	16677.6	16691.3	18916.8	18338	17148.6	19513.6	18403.4	18764.3	17619.6	22243.8	18886	19844	21615.7	18758.9	21414.3	23154.1	18852	22854.7	18629.2	17453.2	18200.8	17369.3	18289.9	20269.7	20980.9	1	1.04283	0.995192	1.04794	1.16137	1.20212	0	0.21191	-0.0237876	0.237177	0.798392
Q9NNX1	TUFT1	Tuftelin	17430.6	17456.3	15495.1	15399.5	15197.9	20723.8	17627.1	20332.7	19381.2	20208	15196.1	21198.3	17583.4	17257.3	23171.4	16313.2	17208	14506.2	15667	16361.9	18171.8	19723.7	17096.7	19233.2	20199.1	17040.9	19517.8	16825.9	19628.8	18631.4	16195.9	19654.6	18881.3	16011.3	18884.9	18329	1	1.21355	1.16581	0.9886	1.16603	1.13171	0	1.62144	1.25893	-0.0865537	1.26061
Q9ULV0	MYO5B	Unconventional myosin-Vb	10265.4	10139.7	10354.6	8849.62	10514.3	7128.53	8813.15	7223.32	6918.02	7358.03	9558.08	8737.57	9752.82	9503.29	6019.66	11008.5	9313.35	11247.5	8535.5	10525.1	9909.56	11796.1	9042.97	8752.77	7118.59	8550.4	7510.72	9199.29	7385.37	9903.4	10024.7	7488.21	8714.28	10126	9324	8509.83	1	0.746975	0.86928	1.0101	0.930101	0.848885	1	-0.674389	0.134961	1.06686	0.537447
Q99959	PKP2	Plakophilin-2	5041.46	5800.77	6783.55	4389.64	7101.67	7053.93	7932.22	8501.27	6575.21	7817.1	7513.89	7127.94	8138.92	7632.31	7077.71	6985.3	7601.76	7316.52	5698.82	7057.01	8021.15	7060.65	7673.61	6577.34	7690.22	8083.27	7176.58	7067.75	7367.9	6507.32	5823.42	7575.95	7498.15	6931.88	7404.6	7240.56	1	1.30094	1.28759	1.19035	1.27152	1.24335	0	1.23666	1.18177	0.782181	1.11575
Q96RF0	SNX18	Sorting nexin-18	28674.3	22546.2	34040.8	24280	13539.8	24593.9	15315.1	19010.5	17240.1	18690	26929.6	9846.89	10236.6	21251.3	15907.7	14188.4	19925.3	22574.6	30476.7	27184.2	20820.4	24304.4	11030.7	22891.4	24458.3	22939.5	17853.2	12073.6	12407.5	15187.1	24616.2	18969.9	16834.4	22869.8	20701	16092.2	1	0.770627	0.683875	0.929056	0.840951	0.653722	1	0.337604	0.0870759	0.795124	0.54069
Q7KZF4	SND1	Staphylococcal nuclease domain-containing protein 1	129547	137921	128854	142810	176929	157928	164020	158672	162548	176310	165271	156322	156219	185239	155684	157809	167669	208676	165670	197671	152899	169530	161061	162686	171301	179380	147323	170569	152121	192596	143212	163896	163747	179499	163495	168398	1	1.14443	1.14339	1.25338	1.14163	1.17586	0	0.821248	0.81534	1.44078	0.805344
O00244	ATOX1	Copper transport protein ATOX1	125395	123086	116945	118696	110252	140720	122227	152427	136999	147888	107476	130884	114955	120864	159550	119053	123641	108861	104523	130523	134063	125063	117588	149152	158245	122109	142368	123465	148690	125893	118875	140052	126746	117320	136822	132505	1	1.17815	1.06621	0.986923	1.15098	1.11466	0	1.55374	0.577481	-0.114056	1.31677
Q7Z3B3	KANSL1	KAT8 regulatory NSL complex subunit 1	1791.74	2286.44	2480.25	1476.26	1635.96	4941.03	2901.92	2508.25	3041.39	1844.67	2376.49	2177.48	944.679	5148.62	2090.75	1926.08	3550.65	1431.09	3162.2	2814.81	2530.52	2199.72	2050.31	4180.98	2290.2	4451.9	2399.55	2251.47	2593.94	2533.62	1934.13	3047.45	2547.6	2576.97	2650.35	2846.09	1	1.57562	1.31718	1.33237	1.37031	1.47151	0	1.2208	0.672696	0.704893	0.785359
O00311	CDC7	Cell division cycle 7-related protein kinase	1698.55	2506.1	1132.98	1680.28	1636.74	2832.31	3096.17	2555.66	3179.76	2310.36	2762.99	2591.91	1828.62	3290.59	2446.73	2862.07	1657.4	2659.74	2682.89	2058.5	2418.02	2621.1	2280.42	2265.78	2365.85	2233.48	2325.13	2172.83	2896.04	2244.88	1730.93	2794.85	2584.17	2384.12	2390.23	2374.47	1	1.61465	1.49293	1.37736	1.38089	1.37179	0	1.65323	1.32585	1.01499	1.0245
P31025;Q5VSP4	LCN1;LCN1P1	Lipocalin-1;Putative lipocalin 1-like protein 1	890.181	379.046	827.267	352.257	768.8	1160.8	288.693	892.883	603.473	8366.6	343.312	806.26	7957.39	79150.8	296.499	332.697	781.331	5821.37	840.751	385.224	1245.01	500.256	340.464	1114.43	1262.88	878.461	882.822	1857.87	836.735	5421.3	643.51	2262.49	17710.9	1632.27	892.607	1975.44	1	3.51586	27.5223	2.53652	1.38709	3.06978	0	1.21552	12.814	0.742356	0.18702
Q9Y426	C2CD2	C2 domain-containing protein 2	7593.45	8087.82	6166.44	6960.62	7341.54	7553.51	4350.82	10383.8	6259.29	6996.11	7724.14	7429.73	8871.34	6406.23	7401.18	7628.44	8091.23	6349.98	8514.62	8005.41	6693.19	7075.33	6419.59	8582.64	6713.49	8313.26	9910.78	7346.63	9637.8	8264.15	7229.97	7108.7	7566.52	7717.93	7096.85	8694.52	1	0.983227	1.04655	1.06749	0.981587	1.20257	0	-0.0828036	0.229795	0.333181	-0.0908993
Q16822	PCK2	Phosphoenolpyruvate carboxykinase [GTP], mitochondrial	307315	311631	295477	315027	343194	354464	346666	347975	343246	361507	327351	329738	330611	341848	342473	323661	328700	378635	338480	360951	302845	322026	317664	301897	339186	350605	315078	338781	338498	371784	314529	350771	334404	346085	316724	342949	1	1.11523	1.06319	1.10033	1.00698	1.09036	0	1.27525	0.699342	1.11036	0.0772262
Q9HAV7	GRPEL1	GrpE protein homolog 1, mitochondrial	190132	176423	176365	157181	156276	186445	176772	200609	177140	191125	168590	184613	177333	174734	189759	173243	172957	169413	166867	173212	178651	184589	170130	192891	167826	183011	181096	186523	209842	188883	171276	186418	179006	171138	178817	189871	1	1.08841	1.04513	0.999198	1.04403	1.10857	0	0.814313	0.415704	-0.00738706	0.405569
O15355	PPM1G	Protein phosphatase 1G	308047	296678	313928	276205	282389	328585	296788	332302	313555	326213	290425	303002	305413	296808	330347	287764	301364	309106	302941	319468	312743	314198	302381	330287	302520	307277	313785	314720	358599	317619	295449	319488	305199	304129	312426	322400	1	1.08136	1.033	1.02938	1.05746	1.09122	0	0.891968	0.361753	0.32204	0.629913
O95983	MBD3	Methyl-CpG-binding domain protein 3	15578.5	16356.9	14945	15983.3	16080.2	20334	18562.8	18623.9	17410.9	20300.8	17686.9	16981.5	16710.8	17669.2	18542.1	16060.2	14243	17155.5	15831.3	18692.1	20347.2	17836.3	16821.4	17467.6	20330.2	17517.8	17601.2	15945	18349	17950	15788.8	19046.5	17518.1	16396.5	18560.6	17472.6	1	1.20633	1.10953	1.03849	1.17555	1.10665	0	1.93467	1.02703	0.360895	1.64611
P51692	STAT5B	Signal transducer and activator of transcription 5B	884.488	1103.5	1550.06	5360.43	7866.71	8021.34	7847.34	1200.3	1926.48	1357.66	1481.52	7152.97	7026.68	2379.93	1477.65	3724.87	7365.04	1815.98	7298.73	2223.31	1714.15	2358.39	1499.11	2051.57	1850.37	2693.58	7733.53	8148.21	7539.79	7553.97	3353.04	4070.62	3903.75	4485.59	1894.72	6733.82	1	1.21401	1.16424	1.33777	0.565075	2.00827	0	0.212254	0.162894	0.334996	-0.431357
Q9NZT1	CALML5	Calmodulin-like protein 5	499690	451199	474749	444349	404440	458612	450507	525329	472928	497239	431912	457960	448896	414490	480012	443316	441102	415104	450182	456390	498956	461016	432723	513746	487589	487528	507206	475262	583748	491127	454885	480923	446654	441219	478806	508974	1	1.05724	0.981904	0.969956	1.05259	1.11891	0	0.481391	-0.152186	-0.252668	0.44225
Q9Y6I9	TEX264	Testis-expressed protein 264	35271.3	33356.6	29527.4	34565.4	24851.8	23009.1	28766.3	19558	12969.5	23808.3	27790	27427	24426.4	23047.4	20936.3	29697.9	31049.2	28525.6	14237.8	28879.1	27201.2	23829.6	30838.9	23164.7	17452.2	16015.5	35874.7	16549.8	22361.7	25718.2	31514.5	21622.3	24725.4	26477.9	24497.3	23304	1	0.686105	0.784573	0.840183	0.777335	0.739469	1	-0.204824	0.173125	0.386574	0.145344
Q8N967	LRTM2	Leucine-rich repeat and transmembrane domain-containing protein 2	322.31	756.937	9393.75	814.502	504.572	396.869	4061.02	811.573	621.45	5336.89	929.437	355.857	776.659	443.377	967.67	683.406	313.13	735.379	5750.05	6464.02	5141.49	5995.67	699.36	4628.44	4823.32	1029.38	5681.11	4086.76	6572.24	7036.04	2358.41	2245.56	694.6	2789.2	4257.66	4881.11	1	0.952149	0.29452	1.18266	1.80531	2.06966	0	-0.0447349	-0.659538	0.170763	0.752863
Q01650	SLC7A5	Large neutral amino acids transporter small subunit 1	28519.4	25661.2	24744.7	23653.4	25536.1	27186.2	31147.1	28478.6	27300	35936.7	25455.9	29902.3	23965.5	29440.3	33675.7	29504.5	23375.7	26955	27733.1	29747.2	35921.6	31358.6	25446.2	29578.8	28254.4	27274.7	30412.6	28203.1	35044.3	26578.2	25623	30009.7	28487.9	27463.1	30111.9	29502.6	1	1.1712	1.11181	1.07182	1.17519	1.15141	0	1.13072	0.738473	0.474314	1.15707
O15027	SEC16A	Protein transport protein Sec16A	657780	601996	612066	577224	558070	578288	560132	706820	554828	674318	544092	648211	569521	614894	619724	626848	573687	571560	567039	617682	679027	618286	560096	716859	577318	610026	674375	657310	769622	639386	601427	614877	599289	591363	630317	670144	1	1.02236	0.996444	0.983267	1.04804	1.11426	0	0.195732	-0.0311219	-0.146455	0.420422
Q9NUM4	TMEM106B	Transmembrane protein 106B	207502	199927	201215	195038	205533	236702	214443	240471	216637	246065	196605	205790	203737	198143	232545	186947	190639	193480	185822	212758	216476	215439	192418	239240	218536	212751	219760	204546	242303	212314	201843	230864	207364	193929	216422	218335	1	1.14378	1.02735	0.960791	1.07223	1.08171	0	1.75972	0.334758	-0.479882	0.884004
P04818	TYMS	Thymidylate synthase	11552.2	14901	14002.2	13828.6	16529.8	15653.5	17913.1	15891.1	15371.2	16811.6	15860.4	14751.4	17501.7	16827.3	15061.3	17533	16392.8	17250.4	15300.5	15440	15907.8	15235.2	15461.5	13574.3	17033.6	17659.1	15529.8	17272.4	14641.4	18843.1	14162.7	16328.1	16000.4	16383.3	15442.5	16789.1	1	1.15289	1.12975	1.15679	1.09036	1.18544	0	0.824466	0.699686	0.845491	0.487263
Q9UKX7	NUP50	Nuclear pore complex protein Nup50	109641	100307	108609	101896	91662.8	105123	93198.6	112108	103438	101033	99300.5	103142	96650.8	98581.5	103227	99803.7	93317.5	97570.6	100840	104213	111836	105799	94674.7	115352	101742	105951	111480	112665	125985	110258	102423	102980	100180	99148.9	105881	113268	1	1.00544	0.978104	0.968033	1.03376	1.10588	0	0.0513667	-0.206793	-0.301908	0.318839
Q9H1I8	ASCC2	Activating signal cointegrator 1 complex subunit 2	16067.6	35994.5	16842.9	25299.6	22680.7	22546.1	22266.6	20210.8	20251.1	23750.6	39354.5	35937.1	28590.3	18884.2	18869.3	16552.1	22377.2	25912	17794.3	19008.6	15973.9	16362.7	16550	15846.2	18167.8	34608.2	32280.5	36634.4	22230.6	37822.8	23377.1	21805	28327.1	20328.9	16580.1	32715.3	1	0.932753	1.21175	0.869607	0.709247	1.39946	0	-0.168344	0.53008	-0.326421	-0.727861
P21399	ACO1	Cytoplasmic aconitate hydratase	45735.5	47898.4	33054.8	40263.1	31728.9	45891.4	41183.9	47934.3	45773.5	41776.8	45571	44266.7	40452.2	19067.1	46301.8	46728.7	41065.5	49138.6	35871.2	25521.9	28549.2	42916.4	46768.7	33904.4	37730.4	47887.9	45687.8	46460.6	51393.9	44844.5	39736.1	44512	39131.8	39665.2	37973.8	47254.9	1	1.12019	0.984791	0.998215	0.95565	1.18922	0	0.635191	-0.0803772	-0.00943467	-0.234384
Q8IWR0	ZC3H7A	Zinc finger CCCH domain-containing protein 7A	7850.29	8239.8	9391.16	8774.41	10569.3	10342.6	10038.7	9323.31	9751.16	10446	10831.2	10994.6	10143.4	11280.9	9519.65	10405.9	8676.28	11845.9	11452.9	10390.9	10054.4	10235.4	10366.8	10370.3	8725.08	10828	10573.4	9817.97	9858.17	10928.6	8964.99	9980.37	10554	10554.4	9950.39	10401.2	1	1.11326	1.17724	1.17729	1.10992	1.16021	0	0.706972	1.10635	1.10663	0.6861
P13688	CEACAM1	Carcinoembryonic antigen-related cell adhesion molecule 1	18779.5	20533.8	20359.2	18745.8	19650.5	18128.8	20084.2	20101	20895.5	22874.1	22662.9	19742.7	19925.3	22389.7	22392.1	22224.5	21331.5	22524	18955.2	22682.2	23320.5	25120	25371.2	19684.1	25964.1	21828.1	21487.6	19762.4	22287.9	23056.9	19613.8	20416.7	21422.6	21543.5	23892	21684.6	1	1.04094	1.09222	1.09839	1.21812	1.10558	0	0.387749	0.873468	0.931863	2.06595
Q9UBU9	NXF1	Nuclear RNA export factor 1	5014.58	8038.31	7033.88	4607.03	12471.3	9381.73	9226.73	10903.8	10415.6	11665.6	10428.3	9163.64	9623.17	11625.1	11198.7	8863.37	9966.39	10936.9	10400.5	13088	8486.09	8504.32	10700.8	11465.1	11674.8	10158.5	9103.92	10357	9853.9	12122.8	7433.02	10318.7	10407.8	10651	10166.2	10319.2	1	1.38822	1.40021	1.43293	1.36771	1.3883	0	0.999812	1.03068	1.11496	0.946986
Q9H6R6	ZDHHC6	Palmitoyltransferase ZDHHC6	344.21	2187.44	896.999	1465.15	2605.13	476.794	3080.65	2016.14	2070.07	2662.04	2560.2	2490.14	2583.99	3274.74	2210.56	2139.52	1850.96	2703.13	3085.79	2978.89	2690.28	2290.04	2543.05	2872.54	2889.92	3166.94	2154.14	2484.06	2771.44	2679.45	1499.78	2061.14	2623.93	2551.66	2657.17	2651.21	1	1.37429	1.74953	1.70135	1.7717	1.76772	0	0.487532	0.976307	0.913545	1.00518
P48436	SOX9	Transcription factor SOX-9	1945.46	2119.04	2169.99	2278.73	2380.74	2405.75	2253.16	2654.07	2772.71	2902.78	2108.72	1711	1721.62	3018.82	2445.92	735.079	336.806	1136.11	2789.77	2691.28	2151.89	2268.01	2657.93	2786.33	3720.8	957.022	407.507	2186.02	2202.9	826.527	2178.79	2597.69	2201.22	1537.81	2716.99	1316	1	1.19226	1.01029	0.705808	1.24702	0.604003	1	1.48552	1.02599	0.257086	1.62379
Q9UHD8	SEPTIN9	Septin-9	765177	750509	761596	684346	684828	797501	687717	804785	749219	742701	695887	753671	737470	676022	759730	721793	760130	676326	694172	739728	792073	716758	730961	806046	702377	763188	790120	772856	868208	765660	729291	756385	724556	718430	749643	792006	1	1.03715	0.993507	0.985107	1.02791	1.08599	0	0.432007	-0.0755027	-0.173189	0.324508
Q9UL26	RAB22A	Ras-related protein Rab-22A	81398.9	76285.8	72246.4	69952.3	76183.2	68741.1	70520.5	72066	74850.1	69590.8	70240.1	68571.1	72423.8	70995.5	67986.5	70589.4	72288.3	74466.2	70774.5	75285.1	75228.9	77916.8	69766.9	73635.4	65549	68541.5	69587.8	69946.9	71293.3	68803.8	75213.3	71153.7	70043.4	72680.7	72419.4	69634.7	1	0.946025	0.931263	0.966328	0.962853	0.925829	1	0.272291	0.0732661	0.546017	0.499175
Q14207	NPAT	Protein NPAT	1551.76	1243.42	1966.08	1258.79	1177.01	799.274	887.533	1308.05	1760.3	1380.35	895.057	902.006	1049.56	1540.65	728.053	1641.03	949.914	1427.27	841.085	1355.05	1207.08	1365.06	867.782	1055.38	1032.44	528.472	1278.99	861.225	936.795	1121.42	1439.41	1227.1	1023.06	1242.87	1105.55	945.381	1	0.852501	0.710751	0.863456	0.768054	0.656783	1	0.570246	0.157244	0.602165	0.324202
P28340	POLD1	DNA polymerase delta catalytic subunit	106326	105951	105458	105785	106535	101313	101242	98754.1	108259	103185	102613	104902	99735.7	99069.5	99295.6	105605	107098	106460	101010	108009	107758	108325	102560	102492	104251	108246	109980	110617	118302	115570	106011	102551	101123	105636	105077	112543	1	0.967358	0.953894	0.996467	0.991192	1.06162	0	-0.529741	-0.74823	-0.0573349	-0.142944
Q96JP2	MYO15B	Unconventional myosin-XVB	1495.66	1781.94	649.779	1395.88	1495.36	1636.43	2197.23	1818	1906.8	2568.69	1583.13	1960.67	1788.91	1354.79	2208.22	1961.81	1847.25	1827.75	326.439	1036.45	1270.38	1035.38	1967.27	1933.14	2781.19	1346.87	2288.13	2076.45	2560.03	2388.14	1363.72	2025.43	1779.14	1399.94	1797.47	2131.92	1	1.48522	1.30462	1.02656	1.31806	1.56331	0	0.861374	0.540771	0.047148	0.564631
P62877	RBX1	E3 ubiquitin-protein ligase RBX1	331352	316916	337720	323346	323216	377826	337258	365130	348759	350991	304719	341791	336962	344487	394475	320141	310158	323597	320292	358401	366854	329953	312416	386569	371666	340449	356008	351017	384643	326439	326510	355993	344487	326518	353492	351711	1	1.0903	1.05506	1.00002	1.08264	1.07718	0	1.16991	0.713345	0.000309015	1.07066
P61981	YWHAG	14-3-3 protein gamma	2.31439e+06	2163904	2.33234e+06	1993855	1.9939e+06	2199603	1.95041e+06	2404073	2.05711e+06	2200941	1.98819e+06	2.17497e+06	2.12867e+06	1.99401e+06	2273869	2166639	2.16571e+06	1.88612e+06	2.12882e+06	2.10838e+06	2.30174e+06	2173369	2107522	2.25622e+06	2.15273e+06	2.25116e+06	2.36766e+06	2.32877e+06	2.71232e+06	2.33023e+06	2.15968e+06	2.16243e+06	2.11194e+06	2.09113e+06	2.19832e+06	2.39803e+06	1	1.00127	0.977897	0.968262	1.01789	1.11036	0	0.0115327	-0.200279	-0.287582	0.162103
Q9UPQ9	TNRC6B	Trinucleotide repeat-containing gene 6B protein	23203.3	22308.9	18177	18908.3	21109.1	23867.9	25946.8	21488.4	26714.7	22980.8	27753.9	18867	23940.1	20708.2	19899.3	23952.5	20337.2	19511.7	17212.2	25949.2	20116.2	17784.4	23010	23221	28078.3	24693.2	26360	24634.9	19970.8	25442.9	20741.3	24199.7	22233.7	21392.6	22442	24220.4	1	1.16674	1.07195	1.0314	1.082	1.16773	0	0.994076	0.428972	0.187198	0.488839
Q92567	FAM168A	Protein FAM168A	13878.2	16759.6	15127.6	12780.4	15631.7	19327.9	19771.6	21030.7	17158.7	22172.1	15827.1	20303.4	14681.9	18330.6	22247.5	15642.4	15767.2	18348.7	16252.7	18216.5	18299.8	16446.9	16763.7	23833	20047.5	16597.3	17149	20702.2	23215.2	14592.7	14835.5	19892.2	18278.1	16845.5	19078.2	18451.3	1	1.34085	1.23205	1.13549	1.28598	1.24373	0	1.3985	0.952107	0.555896	1.17337
P78344	EIF4G2	Eukaryotic translation initiation factor 4 gamma 2	303972	294099	308549	272267	252802	271229	272181	316560	304584	280647	278797	268846	296600	239424	256922	276847	273280	256801	270917	267525	298716	281482	280932	291932	273352	252611	279909	259750	260041	241914	286338	289040	268118	269074	285283	258845	1	1.00944	0.936368	0.939708	0.996317	0.903985	1	1.0983	0.337275	0.372058	0.961637
Q92817	EVPL	Envoplakin	34606.5	39596.6	16216.9	27777.1	37662.1	17376.9	44955.1	108498	39899.9	43775.6	38491.8	40352.5	43160.7	39433.7	32687.1	35799.7	38506.2	34140.3	25902.5	29339.2	32145	30139.9	34107.4	35108.9	43217.5	41572.4	32804.6	47668.3	44848.8	49984	31171.8	50901	38825.2	32737.6	34943.7	43375.6	1	1.63292	1.24552	1.05023	1.121	1.3915	0	1.61665	0.627129	0.128301	0.309078
Q8N2K1	UBE2J2	Ubiquitin-conjugating enzyme E2 J2	7484.92	3291.79	6573.77	8592.71	2924.28	1793.02	2937.22	2319.7	2614.62	3107.48	4224.82	3869.06	2133.37	3302.69	2118.47	2896.23	4385.64	3705.48	5740.87	5155.68	4317.38	4502.39	990.515	3802.24	3564.03	4133.47	354.375	3695.74	381.325	3716.41	5773.49	2554.41	3129.68	4376.78	3435.31	2456.26	1	0.442437	0.542078	0.758082	0.595014	0.425438	1	0.0295856	0.203006	0.578952	0.29514
O75882	ATRN	Attractin	13081.2	11435.7	11597.3	11777.9	12502.6	15153.6	12748.4	15845.6	13127.5	14455.2	12086.9	13052.5	13319.4	11763	13116.7	11968.6	12012.3	11720.6	12161.3	12406.1	13556.7	13050.2	12357.9	15081.4	14849.4	13363.3	13579.4	12617.4	15138.7	13357.9	12078.9	14266	12667.7	12053.8	13779.1	13611.3	1	1.18107	1.04874	0.997918	1.14076	1.12687	0	1.42724	0.384216	-0.0164133	1.10949
Q9HC98	NEK6	Serine/threonine-protein kinase Nek6	775.131	458.777	701.224	479.805	325.391	958.203	330.374	436.507	466.507	665.97	1216.06	684.638	401.362	570.155	919.382	620.679	559.374	607.465	373.974	744.964	806.093	558.553	857.738	313.817	774.846	680.583	1193.24	1563.99	995.12	568.766	548.066	571.512	758.318	581.291	662.209	1000.34	1	1.04278	1.38363	1.06062	1.20827	1.82522	0	0.0518414	0.464879	0.0734637	0.252377
A6NHR9	SMCHD1	Structural maintenance of chromosomes flexible hinge domain-containing protein 1	3850.34	5744	5828.75	4441.01	7699.51	6968.5	7065.17	7473.55	7640.18	9388.52	7610.02	7770.38	7889.1	7971.52	7385.32	6995.82	7376.32	8920.48	8977.76	9289.77	7686.99	4958.96	7014.13	6399.49	8747.43	7525	6623.15	7068.79	6215.47	8785.89	5512.72	7707.18	7725.27	8312.03	6961.4	7243.66	1	1.39807	1.40135	1.50779	1.26279	1.31399	0	1.26779	1.27824	1.61722	0.836932
Q8IV56	PRR15	Proline-rich protein 15	73638	64621.8	62879.7	60566.6	55997.4	67124.5	62261.8	69718.5	58529	68051.7	60320	65575.9	63319.5	57572.5	66955.2	62597.8	66331.1	56945.1	57726.2	63731.4	73912.4	65136.8	61211.6	68512.6	64545.1	69213.6	71643.5	66373.5	84476.1	71212.3	63540.7	65137.1	62748.6	61466.3	66663.7	72583.8	1	1.02512	0.987534	0.967353	1.04915	1.14232	0	0.176529	-0.0875897	-0.229391	0.345345
Q9UKG9	CROT	Peroxisomal carnitine O-octanoyltransferase	22136.6	22598.8	20385.3	22290.1	23132.8	19469.3	21177.3	20794.9	21290.6	22197.2	21173.8	21982.3	22453.1	23656.5	21991.1	20851.5	21534.9	24369.9	23907.5	24303.3	24520.9	24076.4	20413.2	24660.1	22267.1	19213.2	19417.9	22748.2	18866.1	18686.8	22108.7	20985.9	22251.4	22993.4	23187.5	19786.4	1	0.949212	1.00645	1.04002	1.0488	0.894961	1	0.51649	1.06142	1.38096	1.46455
Q6P4I2	WDR73	WD repeat-containing protein 73	18348.7	24990.9	28341.3	19820.2	26518.8	24115.6	23393.4	29667.6	28573.8	25726.1	24764.1	24379.5	25253	25302	29517.7	27031.4	25109.1	22562.4	24111.7	26936.9	18845.3	27264.7	25353.4	28830.1	21508	29903.2	25479.2	28847.5	32183.5	26523.9	23604	26295.3	25843.3	25150.3	24360.3	28587.5	1	1.11402	1.09487	1.06551	1.03204	1.21113	0	0.540054	0.449341	0.310282	0.151762
Q96JC1	VPS39	Vam6/Vps39-like protein	35474.6	35191.1	36798.7	36360.4	32752.5	29966.3	28158.1	32894.8	31149.9	31129	32026.2	34650.8	30679.3	31033.3	31022.8	34326.7	29670	29637.3	34490.3	35310.1	34715.6	35910.6	33657.4	34521.9	30911.9	31462.2	31856	32695.3	30261.2	35100.3	35315.5	30659.6	31882.5	32686.9	33943.5	32275	1	0.868164	0.90279	0.925569	0.961151	0.913906	1	-0.531301	-0.129108	0.135469	0.548763
Q9NRA8	EIF4ENIF1	Eukaryotic translation initiation factor 4E transporter	23595.5	22623.3	27307.9	23776.9	20875.4	25027.6	22944.1	25267.2	23606.9	26846.5	24042.7	25059.4	17009.9	20013.7	26826.6	26408.5	22812.6	26234.8	23584.7	29715	28641.5	27171.8	24730.4	28658.3	23793.2	25970.9	26922.7	29944.6	26479.7	24811	23635.8	24738.5	22590.5	25751.1	26599.1	26825.8	1	1.04665	0.955773	1.0895	1.12537	1.13496	0	0.345664	-0.327698	0.663114	0.928929
P23368	ME2	NAD-dependent malic enzyme, mitochondrial	139860	137251	142767	132856	128269	130815	114737	131316	124012	124086	129609	139078	132204	136610	121865	133545	144748	130544	136696	136628	150872	136986	134890	145131	136171	140544	143329	144918	167707	147396	136201	124993	131873	136432	140810	148779	1	0.917714	0.968228	1.0017	1.03384	1.09235	0	-0.891014	-0.34403	0.0184115	0.366457
Q3ZCM7	TUBB8	Tubulin beta-8 chain	10192.9	8763.55	11506.3	12460.7	14684.9	10088.4	12204.5	10751.6	12421.8	13986.3	12318	12547.7	12188.3	9984.08	10735.6	11093.6	8220.38	11087	17855.7	11029.7	8237.88	12452.8	10641.5	10137	15365.4	9831.95	10307.6	7924.44	7802.84	9444.9	11521.7	11890.5	11554.7	11857.3	11366.9	9062.35	1	1.03201	1.00287	1.02913	0.98657	0.786548	1	1.14997	1.01344	1.13646	0.93708
Q9Y6V7	DDX49	Probable ATP-dependent RNA helicase DDX49	1491.7	2147.62	1400.44	2036.19	2203.95	2922.66	2906.73	2334.87	2810.95	2712.94	2415.67	2329.52	2865.3	3383.5	2336.52	3046.93	3106.17	3637.51	2646.95	2886.32	2343.21	2672.89	2938.89	2725.56	3166.68	2895.4	2013.24	2527.18	2119.47	3385.82	1855.98	2737.63	2666.1	3064.78	2769.45	2588.22	1	1.47503	1.43649	1.6513	1.49217	1.39453	0	1.20405	1.10636	1.65082	1.2475
Q9Y6E0	STK24	Serine/threonine-protein kinase 24	55541.8	58383.9	53647.4	56711.8	60137.6	62182.2	59671.2	65355.7	67766.6	66671.4	56745.9	61688.4	63113.8	66278.4	63806.1	57567.9	55684.5	63342.7	57351.8	61961.1	59036	55463.7	58533.4	59634.2	64051.4	60602.2	57205.1	62779.2	66536.7	62204.8	56884.5	64329.4	62326.5	59181.6	59343.7	61865.6	1	1.13088	1.09567	1.04038	1.04323	1.08757	0	1.49462	1.09253	0.461167	0.493715
Q9UKF7	PITPNC1	Cytoplasmic phosphatidylinositol transfer protein 1	10565	8746.91	6494.37	9074.62	9883.99	9020.3	9826.32	11022.2	9526.56	10989.8	11390.6	8846.22	10943.6	13649.8	10341.9	10313	10731.1	9632.69	9924.17	8300.4	9725.78	10196.7	10481.2	12688.1	7711.43	11704.7	11281.2	10302.4	10884.8	10020.5	8952.99	10077	11034.4	9780.26	10160.6	10838.7	1	1.12555	1.23248	1.0924	1.13489	1.21063	0	0.596084	1.10378	0.438703	0.640416
Q8NI35	PATJ	InaD-like protein	35055.4	32795.6	33312.6	34570.4	31694.9	40839.8	35542.5	37699.6	31291.3	38957.4	35362.5	34122.8	34597.9	32684.6	37787.4	36599.7	32655.6	34998.7	32102.6	35071.1	36724.8	34349.4	35093.2	39488.4	37197.1	34271.8	36118.4	36324.7	43506	36947.4	33485.8	36866.1	34911	34285.5	36570.6	37433.7	1	1.10095	1.04256	1.02388	1.09212	1.1179	0	0.856247	0.361018	0.20258	0.781383
P26196	DDX6	Probable ATP-dependent RNA helicase DDX6	223441	219560	211680	215155	214341	243177	241077	238504	240658	215748	226922	221111	225968	218531	221923	223007	231917	246472	223741	221117	217288	233550	226206	228145	201154	207979	193453	201923	206866	213048	216836	235833	222891	229251	221268	204654	1	1.08761	1.02793	1.05726	1.02044	0.943821	1	2.5595	1.49709	2.01917	1.3639
P30050	RPL12	Large ribosomal subunit protein uL11	59976.2	59690.3	59816.3	63709.9	72284.3	63677.3	65947.5	66950.4	66745.4	69497.8	70892.6	67447.8	66193.9	79573.5	68958.9	65096.8	69776.9	77469.6	70023.6	77495.7	65853	64739.2	68099.2	69019	73638.7	74201.1	65384.8	70752.1	65403.8	77037.2	63095.4	66563.7	70613.3	71972.5	68269.8	70555.8	1	1.05497	1.11915	1.14069	1.08201	1.11824	0	0.464895	1.00771	1.1899	0.693585
Q9C0C2	TNKS1BP1	182 kDa tankyrase-1-binding protein	455872	408438	431576	396953	370397	390376	356192	413228	385171	434442	388450	430643	401602	401364	436333	402890	440425	377092	381283	421114	461838	437702	398824	465448	414712	419037	448996	444504	534482	473079	412647	395882	411678	404561	435705	464020	1	0.959371	0.997652	0.980404	1.05588	1.12449	0	-0.326352	-0.0188603	-0.157406	0.448836
Q8NCA5	FAM98A	Protein FAM98A	5034.91	6400.38	6477.76	4965.81	7353.83	7978.1	9061.18	5967.58	9632.78	7805.34	7152.19	9279.82	7004.58	7283.15	7274.02	7671.35	7787.01	9664.62	7511.02	10347.2	5795.08	8122.4	7117.14	6720.13	7100.84	8090.42	7569.42	7034.16	6214.66	8803.64	6046.54	8089	7598.75	8596.25	6971.12	7542.46	1	1.33779	1.25671	1.42168	1.15291	1.2474	0	1.36535	1.03763	1.70444	0.618067
Q14956	GPNMB	Transmembrane glycoprotein NMB	42605.7	38906.4	44052.7	36372.6	37285.7	35926	36554.8	39897.9	38822	43004.3	39499.4	42638.3	41104.9	41743.2	40516.7	43696	42242.9	38088.9	38662.9	42109	48113.6	43806.2	41774.2	44157.9	47459.6	41372.5	44271.5	43166.6	52749.6	44684.2	39844.6	38841	41100.5	40959.9	45062.3	45248.9	1	0.974812	1.03152	1.02799	1.13095	1.13563	0	-0.185706	0.232386	0.206379	0.965476
P24928	POLR2A	DNA-directed RNA polymerase II subunit RPB1	85455.6	246872	249129	77864.7	73378.2	85710.7	81448.8	52013.3	283278	97604.6	78499.8	80973.3	77577.2	87677.9	88347	76587.5	77513.1	41415	78580.1	93983.6	88869.3	86556.5	76867.5	292231	96717.5	81281.9	49449.4	81099.8	87577	43274.3	146540	120011	82615	73615.9	128248	68536.5	1	0.818965	0.563771	0.50236	0.875176	0.467698	1	0.659901	0.180486	0.0651174	0.765502
Q9Y4Y9	LSM5	U6 snRNA-associated Sm-like protein LSm5	68304.8	60739.7	63558.9	47527.4	43200.5	52830	51406.7	46553.2	45746.5	50041.2	48742.4	47166.5	47544.7	45020.1	60803.2	58130.2	63903.2	49285.3	44660	52933.4	63759.3	51253.3	54013	56149.1	54805.9	42449.1	49419.7	42869.2	50170.7	44381.3	56666.3	49315.5	49855.4	53782.4	55996.1	45858	1	0.87028	0.879807	0.949108	0.988174	0.809265	1	0.319896	0.369845	0.733181	0.937999
O14818	PSMA7	Proteasome subunit alpha type-7	2261519	2.09139e+06	2.26034e+06	2.03543e+06	2.02455e+06	1.92693e+06	1.9023e+06	2.17663e+06	1.96906e+06	2075743	1.98601e+06	2.13845e+06	2.08637e+06	2.07863e+06	2078168	2.19312e+06	2.18754e+06	1.92814e+06	2.08435e+06	2.16682e+06	2.20403e+06	2.16381e+06	2.06529e+06	2.2711e+06	2.09883e+06	2230431	2278550	2.25764e+06	2.56963e+06	2.27118e+06	2.13465e+06	2.01013e+06	2.07353e+06	2.112e+06	2.16061e+06	2.32149e+06	1	0.94167	0.971367	0.989389	1.01216	1.08753	0	-0.666413	-0.327127	-0.121232	0.138982
O75347	TBCA	Tubulin-specific chaperone A	651441	632832	643137	647723	544526	625609	593763	663084	623884	685636	583994	627588	604355	596184	672402	613513	568018	534977	610931	611308	681693	634684	556085	674126	614158	645753	687035	670000	776083	672538	623932	638395	616904	587749	632149	690282	1	1.02318	0.988737	0.942009	1.01317	1.10634	0	0.217983	-0.105916	-0.545332	0.123848
Q9HD42	CHMP1A	Charged multivesicular body protein 1a	131349	120630	126555	130750	116276	139998	123130	139033	126028	144392	121318	136659	127183	122895	140811	125616	121679	115340	121371	126817	131665	129998	121091	145634	130423	132836	136206	127565	161043	137624	125112	134516	129773	122165	131762	139055	1	1.07516	1.03725	0.976442	1.05315	1.11144	0	0.674474	0.334291	-0.211389	0.47695
Q06265	EXOSC9	Exosome complex component RRP45	50333.6	49340.3	52469.2	46851.1	48753.6	50815.2	47578.2	56252.5	51582	55715	49471.5	52067.5	50846.5	50770.4	55564	48587.4	51215.9	46945.9	52682	56907.3	53062.4	50192.9	52147.4	62109.8	54506.1	55433.4	53469.8	52102.6	63255.1	50804.2	49549.6	52388.6	51744	51267.7	54403.7	55013	1	1.0573	1.04429	1.03468	1.09797	1.11026	0	0.519638	0.401654	0.314477	0.888482
P62906	RPL10A	Large ribosomal subunit protein uL1	43225.9	48348.1	43886.5	50344	66559.8	61007.4	66173.9	59413	62987.6	68198.6	61315.9	59225.4	60629.6	69397.7	56738	59485.4	60639.2	71987	59081.4	65991.6	54219.1	63405.8	58170.6	55093.4	64796	63502.8	51959.3	62127	56632.5	68971.7	50472.9	63556.1	61461.3	63436.9	59137	60638.7	1	1.25921	1.21771	1.25685	1.17166	1.20141	0	1.28698	1.08092	1.27526	0.85228
Q15813	TBCE	Tubulin-specific chaperone E	19041	22278.5	21975.8	17970.6	26858.1	22624.7	22082.3	21791.3	26427	24030.2	25474.3	21320.8	23575.2	26243.2	19810.1	21543.2	22325.8	33482	25531.8	27273.7	22260.1	25213.8	25224	22518.1	25718	24299.7	23629.3	24763.4	25616.4	30429.1	21624.8	23391.1	23284.7	26031.3	24186.8	25747.6	1	1.08168	1.07676	1.20377	1.11848	1.19065	0	0.428423	0.402615	1.06881	0.621426
Q9Y6J9	TAF6L	TAF6-like RNA polymerase II p300/CBP-associated factor-associated factor 65 kDa subunit 6L	14288	9542.14	12751.7	12463.1	9341.48	8626.04	8855.1	15751.6	6707.37	8404.11	8803.59	7215.38	6596.77	9798.21	9258.39	7529.44	10599.6	9958.28	9506.7	8285.26	9001.43	8173.31	7623.46	8915.27	8862.89	11665.7	8063.87	8243.42	6178.07	9966.9	11677.3	9668.84	8334.47	9175.86	8515.27	8823.6	1	0.828003	0.713733	0.785787	0.729216	0.75562	1	0.296191	-0.171401	0.123443	-0.108044
Q9P2M7	CGN	Cingulin	19720.5	17997.4	19122.4	21425.3	17505.2	19460	20461	24827.1	16764.1	24843.2	19533.3	21467.5	21154.7	18423.8	24824.4	20111	19653.7	18021.2	19093.7	19893.4	22269.5	20801	21092.9	19693.7	24905	19827.5	24444.5	19345.3	25129.1	22601.5	19154.2	21271.1	21080.7	19354.6	21752.4	22269.6	1	1.11052	1.10058	1.01046	1.13565	1.16265	0	0.6795	0.618401	0.064327	0.833998
Q8N2F6	ARMC10	Armadillo repeat-containing protein 10	3882.56	4997.42	2741.5	3879.88	3865.34	4018.34	4157.28	3017.15	3264.44	3773.8	4888.93	3728.8	4188.88	3429.47	1893.22	2785.66	3333.53	3563.45	1770.44	2271.65	3585.58	3050.09	2719.1	2841.99	2174.88	3202.51	3477.97	2780.5	2130.83	2746.97	3873.34	3646.2	3625.86	2744.95	2874.33	2867.76	1	0.941359	0.936107	0.708677	0.74208	0.740383	1	0.774123	0.753895	-0.12213	0.0065351
O15145	ARPC3	Actin-related protein 2/3 complex subunit 3	408780	395994	396799	380070	367394	415071	404911	445622	395114	434090	354952	390111	397973	375117	453367	382696	371516	348040	351924	386656	398418	389465	385791	415426	397124	403287	417807	405658	448483	410729	389807	418962	394304	368166	397245	417193	1	1.07479	1.01153	0.944482	1.01908	1.07025	0	1.06458	0.164187	-0.790245	0.271578
Q8N4Q1	CHCHD4	Mitochondrial intermembrane space import and assembly protein 40	62332.7	59935.5	59175.6	56404.7	49132.5	62752.7	58205.2	70844.3	59916.8	67398.7	52700.9	60793	56729.8	61408.9	70518.3	55637	54442	51549.1	49735.3	65215	65030	64371.8	55573.7	71380.2	65812.5	62270.9	69570.2	60342.6	73151.6	60232.4	57396.2	63823.5	60430.2	55315.7	64433.6	65113.5	1	1.11198	1.05286	0.963752	1.12261	1.13446	0	0.832841	0.393135	-0.26959	0.9119
Q08945	SSRP1	FACT complex subunit SSRP1	74720.2	82580.6	66887	69746.8	80850.1	83718.8	80203.9	84171.7	82207.3	79166.1	83360.3	84976	82664.1	70563.3	80019.9	84426.3	80636.1	79494.3	68885.4	69632.2	73984.3	74831.1	72157.1	79469.8	75297.1	84471.9	82443.7	79171.9	83936.5	82250.3	74957	81893.6	80316.7	76614.9	75147.9	82454.9	1	1.09254	1.0715	1.02212	1.00255	1.10003	0	0.925139	0.714834	0.221118	0.0254617
P63027	VAMP2	Vesicle-associated membrane protein 2	17052.4	15681.1	13701.8	16043	16826.6	16893.9	17491.3	18145.5	17032.2	18209.6	16009.2	17486.2	16061.6	17212.7	19306.8	18819	15216.1	17209	15191.5	17083	17086.5	17701.9	15564	19237.2	18068	16840	18566.7	17142.1	20128.1	17432.4	15861	17554.5	17215.3	16703.7	17531.5	18021.9	1	1.10677	1.08539	1.05313	1.10532	1.13624	0	0.783721	0.626752	0.389994	0.773085
Q96CM8	ACSF2	Medium-chain acyl-CoA ligase ACSF2, mitochondrial	290243	293584	276904	320050	344264	304707	309187	298391	315026	338216	338672	322793	327053	371693	310995	318973	331133	388211	333854	375261	329704	335237	337586	331933	330456	346978	309311	344931	324360	370178	305009	313105	334241	349486	332983	339152	1	1.02654	1.09584	1.14582	1.09172	1.11194	0	0.237128	0.856181	1.3027	0.819331
Q92626	PXDN	Peroxidasin homolog	182848	180408	177727	169287	176515	191047	176269	167838	169786	184298	194581	183444	183293	184513	187652	187774	176680	166243	160729	186445	182113	187851	181112	190317	173660	176713	187283	191397	204861	191310	177357	177848	186697	175574	183011	190313	1	1.00277	1.05266	0.989946	1.03188	1.07305	0	0.0378561	0.720864	-0.13763	0.436371
Q9BUR4	WRAP53	Telomerase Cajal body protein 1	18047.5	21769.3	12807.8	12265.5	18695.1	10470.5	17766.3	18515.4	18464	11527.5	18266.2	18429.3	11200.8	16131.5	19614.4	17199.9	21638.6	19180.6	19537.4	18664.4	17510.9	14550.9	17910.8	19075.1	15370.4	20508.8	21023.7	21287.9	19541.6	21127.5	16717	15348.7	16728.4	19244.2	16883.6	20697.9	1	0.918149	1.00068	1.15117	1.00996	1.23813	0	-0.343725	0.00286485	0.63483	0.0418405
P40818	USP8	Ubiquitin carboxyl-terminal hydrolase 8	20039.9	19328	18817.1	19403.7	20491.3	19116.8	20773.8	20907.3	23339.9	20185.6	22603.9	20038.7	20518.7	22245.9	19025.3	21390.9	22031.5	22970.7	22575	25435.1	22042.2	21169	20776.4	20447.3	22042.5	21343.9	20032.5	21657.9	21329	24005	19616	20864.7	20886.5	22880.7	21295.5	21673.7	1	1.06366	1.06477	1.16643	1.08562	1.1049	0	0.60685	0.617451	1.58658	0.81621
Q9UHR6	ZNHIT2	Zinc finger HIT domain-containing protein 2	9436.18	9645.62	11334.8	13433.4	9316.81	7722.87	13375.6	9601.64	11357.8	11799.2	12870.9	8580.49	10604.1	11027.6	7865.43	7987.47	7605.73	8472.25	7650.64	9139.84	9617.99	11103.6	9658.77	3326.1	10420.6	4988.31	8916.83	9917.65	7926.29	8549.64	10633.3	10771.4	10189.7	8171.18	8825.4	8059.75	1	1.01298	0.958278	0.768449	0.829974	0.757969	1	1.05365	0.827617	0.043301	0.297503
Q9NT62	ATG3	Ubiquitin-like-conjugating enzyme ATG3	167816	154578	150963	143479	138345	143356	133079	151468	134772	143807	138398	136868	134175	130698	136943	147296	148039	137469	145514	140498	151097	149492	147635	158518	148067	127487	135456	128015	155261	132314	151036	141296	135417	143763	150962	135707	1	0.935514	0.896584	0.951848	0.999508	0.898505	1	0.36464	-0.0189279	0.525568	0.995149
P42766	RPL35	Large ribosomal subunit protein uL29	125554	136390	122585	154038	165584	175756	174920	154460	167484	181879	164116	147859	153433	180045	170143	152134	154236	180747	161051	178063	145327	166696	156054	154083	181856	170648	147439	158296	152321	195296	140830	170900	163119	165246	160803	164800	1	1.21352	1.15827	1.17337	1.14182	1.1702	0	1.25449	0.929889	1.01862	0.833259
Q15102	PAFAH1B3	Platelet-activating factor acetylhydrolase IB subunit alpha1	375203	373608	345496	382666	389628	386022	382018	387203	352493	416113	391757	403703	392728	391218	391040	406224	406465	420935	384702	427559	394525	405143	385104	399056	384766	406731	381289	382828	422102	410178	373320	384770	394089	409177	393719	400626	1	1.03067	1.05563	1.09605	1.05464	1.07314	0	0.419314	0.760618	1.31317	0.747053
P31948	STIP1	Stress-induced-phosphoprotein 1	3.85758e+06	3505210	3.77365e+06	3.46963e+06	3.28401e+06	3.39536e+06	3.10301e+06	3622814	3.33341e+06	3.5188e+06	3410453	3595088	3.45035e+06	3387378	3.63447e+06	3.61784e+06	3.60204e+06	3.3824e+06	3460371	3608333	3.85709e+06	3.66619e+06	3447107	3958679	3.66016e+06	3720207	3.88348e+06	3.7923e+06	4339422	3.85434e+06	3.57802e+06	3.39468e+06	3.49555e+06	3.5342e+06	3.71784e+06	3.91795e+06	1	0.948761	0.976951	0.987753	1.03908	1.09501	0	-0.539325	-0.242602	-0.12891	0.411343
O43615	TIMM44	Mitochondrial import inner membrane translocase subunit TIM44	87733.7	82309.6	86826.6	73644.4	77077	84852.2	73742.6	83409.4	70066.7	80389.2	79821.3	82262.4	78651.2	73005.7	82589.9	82054.1	81613.3	70638.6	76964.2	73873.1	82463.2	87674.3	86447.8	80423.7	82573.3	67853.3	74900.1	75661.3	79988.1	68632.5	81518.3	78492	79266.1	77028.7	83916.4	73407.1	1	0.962876	0.972372	0.944925	1.02942	0.900498	1	0.626904	0.72234	0.446496	1.29566
O75144	ICOSLG	ICOS ligand	16366.6	14415.7	13628.8	16750.8	14730.7	14705.7	13500.5	10828.5	13605.8	11948.7	10832.2	13003.2	14970.1	11684.4	14706.3	11565.4	14401.5	12756.8	8043.53	15196.8	13081.4	13281.5	11050.3	15717.3	14091.6	13932.4	12485	13864.3	13953.1	12622.5	15178.5	12917.8	13039.3	12392.8	13444.4	13371.4	1	0.85106	0.85906	0.816468	0.885752	0.880945	1	-0.251021	-0.183827	-0.541572	0.0403736
Q9NTK5	OLA1	Obg-like ATPase 1	254054	272561	245565	293780	338371	341369	337095	320874	346776	361436	321036	305324	319328	345621	332736	301007	329272	408052	314515	367780	293367	320031	314067	304682	339289	351331	290878	329264	292569	378504	280866	341510	324809	344125	314287	328509	1	1.21592	1.15645	1.22523	1.11899	1.16963	0	1.27288	0.922335	1.32777	0.701488
Q8NI37	PPTC7	Protein phosphatase PTC7 homolog	598.333	892.966	548.073	1054.33	1176.57	31.4611	1431.98	1134.01	1226.29	1409.13	1131.05	995.26	414.702	1186.02	867.875	542.424	898.139	865.699	818.375	985.728	714.043	1164.26	1071.25	717.587	1315.98	327.67	750.585	43.2378	151.79	683.465	854.055	1046.58	918.983	822.073	996.623	391.35	1	1.22542	1.07602	0.962553	1.16693	0.458226	1	1.41608	1.14032	0.930881	1.30812
Q8TCD5	NT5C	5'(3')-deoxyribonucleotidase, cytosolic type	37290.8	37388.3	38214.9	33868.8	31649.5	32900.9	30894.6	36811.1	35971.2	34508.3	35728.6	38911.2	35436	27354.3	35061.3	38144.7	38076.7	30753.7	34837.3	33037.9	35788	37139.4	36338	39326.2	33110.9	36366.6	41481.5	38234.8	45294.6	39702.8	35682.5	34217.2	34498.3	34970	36340.5	40216.1	1	0.958937	0.966814	0.980035	1.01844	1.12705	0	-0.323195	-0.261197	-0.15714	0.145148
Q9C005	DPY30	Protein dpy-30 homolog	216287	200464	202491	194237	187727	193617	178593	206521	177806	199084	190066	206350	202243	192109	209837	203127	207912	186520	182386	196044	221463	198499	215089	201912	246248	227854	234520	211948	245324	193780	200241	191124	200121	195198	216642	222685	1	0.95447	0.999401	0.974814	1.08191	1.11208	0	-0.406213	-0.00534553	-0.224708	0.730756
P0C7T5	ATXN1L	Ataxin-1-like	12111.2	13232.6	17921.5	9371.69	14112.5	17154	16925.8	19576.7	17263.5	16228.8	13661.4	18963.9	14197.7	15564.8	18441.5	17433.9	14176.3	12723.3	18856.7	17115.5	18947.2	17746.7	16108.7	19965.9	15178	16596.2	16303.6	14992.1	18329.2	16407.6	13349.9	17429.8	16165.8	16061.1	17589.3	16525.7	1	1.30561	1.21093	1.20309	1.31756	1.23789	0	1.28466	0.886681	0.853713	1.3349
Q86U44	METTL3	N6-adenosine-methyltransferase catalytic subunit	104982	119376	132769	93369.8	97972.4	114225	112448	128616	125266	136713	116085	125611	112163	125934	133927	127715	136614	121380	102840	108554	137425	122349	134178	145075	128450	143614	122959	128444	147879	108866	109694	123454	122744	119421	133495	130352	1	1.12544	1.11897	1.08867	1.21698	1.18833	0	0.666051	0.631694	0.470826	1.15213
Q96MF7	NSMCE2	E3 SUMO-protein ligase NSE2	3156.66	3252.24	4427.45	3058.1	3654.25	4518.43	3197.42	3590.46	3337.07	4253.06	4354.56	4023.3	3744.27	3530.47	3507.36	4014.57	3736.85	4292.65	4236.22	4384.23	5056.29	4477.18	3498.76	4448.29	4510.19	4178.26	4104.78	3965.66	4761.14	4372.81	3509.74	3779.29	3831.99	4132.9	4398.14	4276.53	1	1.0768	1.09182	1.17755	1.25313	1.21848	0	0.351529	0.420265	0.812692	1.1586
Q13601	KRR1	KRR1 small subunit processome component homolog	14305.3	13677.2	11718.3	15724.7	16018.5	18944.8	16676.4	16704.8	19531.7	18008.2	17625.8	15178.4	17137.1	19503.4	15147	17192.8	15643.3	19664.6	18817.2	20176.9	13068.1	15517.9	17458.1	14025.1	18687.1	19426.6	15288.1	14658.7	16754	19646.7	14288.8	17973.2	16918.3	18299	15751.3	17154.8	1	1.25785	1.18403	1.28065	1.10235	1.20058	0	1.28554	0.917486	1.39921	0.510278
Q9BQ24	ZFYVE21	Zinc finger FYVE domain-containing protein 21	5018.05	4700.68	4311.44	5724.78	5895.54	4504.72	5235.11	4494.07	4045	4861.02	5397.8	4791.99	3318.3	4060.36	3794.8	4402.08	4704.57	6321.67	6973.65	5379.52	4394.73	5534.67	2512.43	4442.44	4781.11	4357.2	2610.1	3760.8	3796.19	5128.51	5130.1	4627.98	4272.65	5556.3	4333.08	3930.56	1	0.902124	0.83286	1.08308	0.844639	0.766177	1	0.581412	0.285185	1.3553	0.33556
P35611	ADD1	Alpha-adducin	60972.9	61037	64713.1	52653.4	51803.9	52600.8	52247.9	60838.6	55851.6	62830.2	55505	58239.9	59608.6	56556.7	61655.8	64927.5	62485.6	54626.7	60224.9	64463	67750.5	64899	58220	67937	62244.7	59100.3	65362	64954.8	71963.3	66144.8	58236	56873.8	58313.2	61345.5	64210.2	65505	1	0.976609	1.00132	1.05339	1.10259	1.12482	0	-0.187399	0.0106151	0.427775	0.821874
P61457	PCBD1	Pterin-4-alpha-carbinolamine dehydratase	849999	785521	823012	712125	736034	691605	619192	754181	675586	763142	755861	822668	749769	703905	761265	816737	826724	680463	743902	743398	858093	805470	760761	825371	709558	813930	867615	832149	963222	829321	781338	700741	758694	762245	791851	861247	1	0.896848	0.971018	0.975563	1.01345	1.10227	0	-1.00861	-0.283379	-0.238938	0.131556
Q9H299	SH3BGRL3	SH3 domain-binding glutamic acid-rich-like protein 3	433407	417320	414390	417189	381047	442055	431551	509387	455024	490495	378811	427973	413506	386135	480686	404068	374979	374489	384855	430124	423923	426463	390225	472075	439936	420360	468588	430602	525312	438126	412671	465702	417422	393703	430524	456598	1	1.12851	1.01151	0.954037	1.04326	1.10645	0	1.20727	0.108169	-0.431796	0.406443
Q5VW36	FOCAD	Focadhesin	1784.36	2229.73	1887.26	1552.23	2168.36	2009.1	2111.9	1542.93	1935.67	1426.57	2109.45	2254.94	2365.77	1931.46	1732.6	2020.43	2129.87	2537.34	2039.7	1682.21	1826.44	2056.24	1285.42	1772.3	1348.92	1632.08	1418.72	1413.94	1014.32	1672.25	1924.39	1805.23	2078.84	2081.91	1657.86	1430.26	1	0.938081	1.08026	1.08185	0.861502	0.743229	1	0.758856	1.31258	1.31878	0.460617
Q13310	PABPC4	Polyadenylate-binding protein 4	162154	161067	148701	159673	181262	179670	182539	174764	195185	178721	186546	172295	179611	181892	162328	183605	190685	213744	181463	195102	172171	181061	176709	169522	190702	194281	161188	173945	177441	202649	162571	182176	176534	192920	178033	181901	1	1.12059	1.08589	1.18668	1.09511	1.1189	0	1.01422	0.722357	1.57004	0.799893
P82909	KGD4	Alpha-ketoglutarate dehydrogenase component 4	53221	54947.8	52501	51791.4	48058.6	61612.5	55729	61103.9	56744.4	57930.1	51915.3	52448.2	53403.3	53830.4	55984.5	51021.7	49313.5	46499.4	45589.6	51008	57163.9	52543.2	51544.1	55409.5	57481.6	53445.4	59315.4	56730.6	59923.7	53967.7	52104	58624	53516.4	48686.5	54828.5	56676.6	1	1.12514	1.02711	0.93441	1.05229	1.08776	0	1.42589	0.308885	-0.747382	0.595833
Q13087	PDIA2	Protein disulfide-isomerase A2	396.635	10151.3	12414.4	804.476	16719.7	20401.1	14879.4	11852.1	16031.3	21515.7	13036.2	18540.5	17224.8	16862.5	13548.3	12745.6	16649.3	14133.4	14983.4	18559.1	15302.1	18785.3	19815.5	487.976	16805.9	15825.2	16891.7	17188.3	15479	20623.7	8097.3	16935.9	15842.5	15414.1	14239.3	17201.6	1	2.09155	1.95651	1.90361	1.75853	2.12436	0	0.970821	0.850717	0.803671	0.674633
Q07092	COL16A1	Collagen alpha-1(XVI) chain	7181.3	7393.84	447.361	1050.62	9831.73	10370.8	10618.8	14237.4	12362	12670.2	12156.8	12031.4	9036.43	10952.6	573.564	9640.01	403.903	10082.9	6891.67	8351.67	4707.7	9495.29	10775.6	3520.43	11044.3	13016.7	12996.7	10168.8	8671.97	8210.87	5180.97	12051.8	8950.15	7074.02	7908.66	10613	1	2.32617	1.7275	1.36539	1.52648	2.04846	0	1.26487	0.693879	0.348498	0.502148
P36543	ATP6V1E1	V-type proton ATPase subunit E 1	123321	112313	114627	112891	112936	122722	115686	127550	120935	119817	113073	114604	121387	115030	123458	114478	116644	113684	112991	114424	120692	119052	117317	120522	121181	121841	120454	120665	133574	121299	115218	121342	117510	114444	119753	123567	1	1.05316	1.0199	0.993287	1.03936	1.07246	0	0.733581	0.274593	-0.0926365	0.543187
Q5TGY1	TMCO4	Transmembrane and coiled-coil domain-containing protein 4	7611.46	6665.5	5000.06	5970.6	6590.2	7367.64	5077.2	6230.41	6358.45	6520.83	5098.13	6890.46	7421.13	6194.27	6930.19	7130.23	7457.54	6105.88	4564.03	5657.45	5358.51	5239.15	4517.19	5726.07	4424.43	5401.15	5714.94	5152.67	4291.56	5231.92	6367.56	6310.91	6506.84	6183.03	5053.07	5158.45	1	0.991102	1.02187	0.971019	0.793564	0.810113	1	0.953141	1.11519	0.847379	-0.0871496
Q86X76	NIT1	Deaminated glutathione amidase	182117	210913	221825	196559	190308	199456	176225	207677	179192	194573	192371	216203	203088	182868	187492	206493	212379	196872	198332	208035	217992	213988	195946	223687	208554	208699	219883	218138	254376	213545	200344	191425	196404	204422	212033	222928	1	0.955479	0.980334	1.02036	1.05835	1.11273	0	-0.394948	-0.174456	0.180572	0.517588
Q96HC4	PDLIM5	PDZ and LIM domain protein 5	154135	143775	149015	140891	128958	154105	141348	162673	141944	162787	133159	151173	137071	134828	159200	137799	143900	123084	128212	139332	150789	147489	134753	154361	152092	154148	161227	147183	176232	151132	143355	152571	143086	134465	147897	157985	1	1.06429	0.998127	0.937989	1.03168	1.10205	0	0.629988	-0.0183537	-0.607631	0.310457
Q32P44	EML3	Echinoderm microtubule-associated protein-like 3	779.043	1568.73	2066.06	832.386	1746.55	2210.86	1710.66	2274.03	2256.49	1525.27	1991.92	1896.57	2022.97	1959.35	2375.57	1671.58	1802.32	1970.22	1859.4	2409.69	1934.45	1774.8	951.359	1398.08	2156.01	1975.79	1998.79	1993.2	2407.99	1864.01	1398.55	1995.46	2049.28	1942.64	1642.94	2047.96	1	1.4268	1.46528	1.38903	1.17474	1.46434	0	0.919167	1.00203	0.837825	0.376323
Q9BQ70	TCF25	Ribosome quality control complex subunit TCF25	2795.64	2610.94	6800.16	2238.65	2227.64	5935.23	4043.52	2131.75	3657.06	2574.09	6689.62	5608.67	1991.48	3030.63	1954.33	3202.87	2168.48	2204.61	2043.79	1908.66	3566.02	3565.12	1513.7	2698.81	2240.03	1973.86	1724.19	1667.06	2083.62	2143.11	3334.61	3668.33	3854.95	2305.68	2716.73	1918.37	1	1.10008	1.15604	0.691441	0.814709	0.575291	1	1.23564	1.36741	0.27348	0.563723
O14730	RIOK3	Serine/threonine-protein kinase RIO3	7592.13	35462.3	35578.1	10287.3	4184.38	25263.8	29032.8	21260.1	36532.4	32375.4	36228	32805.6	19523.9	32319.9	32944.9	38987.1	33403.6	33623.5	36846	37533.4	28287.6	34915.9	24974.2	34451.5	33783.5	33795.7	32797.8	28923.2	34113.4	26125.1	18620.8	28892.9	30764.5	36078.7	31282.5	31151	1	1.55164	1.65215	1.93755	1.67997	1.67291	0	0.819787	0.96915	1.39327	1.0105
O75351	VPS4B	Vacuolar protein sorting-associated protein 4B	59102.1	65936.8	59073.4	67426.4	88623	73700.7	78128.8	72859.7	76832.3	85501.4	79633.8	75164.1	81212.6	81462.6	66886.1	76811.4	78592.5	99661.2	78550.5	93562.7	74651.9	79379.5	78072.6	67986	90312.5	86070.5	73310.1	78478.9	73839.2	89276.8	68032.3	77404.6	76871.8	85435.7	78080.5	80195.1	1	1.13776	1.12993	1.25581	1.1477	1.17878	0	0.77057	0.726766	1.43087	0.826142
Q96DR8	MUCL1	Mucin-like protein 1	216838	188297	204503	109173	141123	171647	161768	194836	180678	189116	176281	198301	178263	172577	200090	197423	194389	211744	181177	206228	219694	200618	170543	203722	199145	202358	218807	212808	255345	205516	171987	179609	185102	198192	198745	218967	1	1.04432	1.07626	1.15237	1.15558	1.27316	0	0.162241	0.279171	0.557795	0.569554
Q12789	GTF3C1	General transcription factor 3C polypeptide 1	61144.9	82226.1	86350.5	57703.1	78930.5	107023	100188	115380	103828	79395.1	85644.7	86252.2	87026.2	102273	95426.3	90826.3	63944.6	94535.9	88458.3	93763.3	91157.1	92879.6	81285.5	97816	90538.5	83111.5	93689.6	86815	81375	86234	73271	101163	91324.4	86305.7	90735.3	86245.1	1	1.38067	1.24639	1.1779	1.23835	1.17707	0	2.14982	1.3915	1.00467	1.3461
Q6UXG2	ELAPOR1	Endosome/lysosome-associated apoptosis and autophagy regulator 1	3018.67	3321.91	2540.39	1860.88	2227.84	2687.82	3413.53	2943.93	3033.03	3271.98	3307.96	3258.29	1969.36	4022.18	2852.24	3857.25	3971.31	3851.26	2976.81	2295.06	1730.54	2773.98	3550.58	2715.13	2436.62	3378.16	3439.92	3229.12	3709.51	2928.17	2593.94	3070.06	3082.01	3390.34	2641.37	3336.97	1	1.18355	1.18816	1.30702	1.01829	1.28645	0	0.640776	0.656856	1.07182	0.0638406
P29401	TKT	Transketolase	2.37138e+06	2.24911e+06	2.36734e+06	2109777	2.18219e+06	2221048	2.04928e+06	2354966	2.2289e+06	2.31807e+06	2.08229e+06	2.27798e+06	2.24359e+06	2211993	2.35191e+06	2.19212e+06	2.23321e+06	2.02813e+06	2.1721e+06	2.29618e+06	2.35463e+06	2276405	2.11087e+06	2.49518e+06	2254135	2.33097e+06	2415195	2384844	2.75935e+06	2.40254e+06	2.25596e+06	2.23445e+06	2.23355e+06	2.18435e+06	2.29824e+06	2.45858e+06	1	0.990467	0.990069	0.968257	1.01874	1.08982	0	-0.106134	-0.110572	-0.353417	0.208696
Q8TET4	GANC	Neutral alpha-glucosidase C	1762.3	3439.37	1810.76	2592.96	4151.53	2508.71	2910.77	2082.11	2008.89	3050.12	3183.31	3802.44	3875.03	1911.25	3855.6	4081.69	3536.06	4106.39	3436.17	3050.01	4172.43	4124.13	4037.73	2672.61	3259.58	4792.46	3718.73	3266.62	3282.29	4558.73	2751.38	2512.12	3325.52	3642.06	3653.29	3923.77	1	0.913039	1.20867	1.32372	1.3278	1.42611	0	-0.204082	0.489722	0.759718	0.769298
Q9BV20	MRI1	Methylthioribose-1-phosphate isomerase	274420	254758	267477	247114	249704	272242	251539	290977	261034	292575	248837	264296	264909	246346	286588	253215	253340	236651	253114	259138	268551	269597	254392	287477	279555	262374	282177	276787	317502	272037	258695	273673	262195	251092	271915	282175	1	1.0579	1.01353	0.97061	1.0511	1.09077	0	0.637909	0.149085	-0.323802	0.563006
O95777	LSM8	U6 snRNA-associated Sm-like protein LSm8	598505	574667	608144	551674	538238	573217	558178	619463	564622	589052	526774	585453	557300	543938	628677	574862	556129	503361	568825	567352	597800	606246	568846	611759	603927	584389	636986	595364	705033	619421	574246	580906	568428	554106	597716	628239	1	1.0116	0.98987	0.964928	1.04087	1.09402	0	0.123361	-0.107742	-0.37301	0.434686
P09972	ALDOC	Fructose-bisphosphate aldolase C	184923	181470	206782	204228	162054	197384	178990	195847	179886	180832	178700	207632	191123	147946	176207	187061	183252	152398	224037	184742	181871	174735	192919	210275	188666	207390	207924	186463	231967	228842	187891	186588	180322	186298	189693	212517	1	0.993064	0.959714	0.991521	1.00959	1.13107	0	-0.0529222	-0.307375	-0.0646956	0.0731688
Q8NFD5	ARID1B	AT-rich interactive domain-containing protein 1B	10713.4	11789	7586.96	11931.5	10471.4	14300.3	13633.8	16202.6	12379.6	15463	11491.9	12475.4	11616.8	14945.8	14630.2	10965.3	10905.1	10848.2	11777	11329.7	11758.3	10576.4	12100.3	16070.3	14617.3	13372.4	12590.5	11400.9	15310.8	11691.2	10498.5	14395.9	13032	11165.1	13024.5	12873.2	1	1.37123	1.24132	1.06349	1.24061	1.22619	0	1.64122	1.06689	0.280705	1.06374
Q8TBE9	NANP	N-acylneuraminate-9-phosphatase	2334.28	2790.92	2583.43	1941.74	2574.72	2371.33	2640.84	2093.82	2304.67	1701.68	1912.19	2071.96	2657.39	4289.28	2014.69	2303.37	2621.84	2581.05	3270.45	2220.1	2321.97	1639.42	1795.29	2799.07	3908.59	2246.95	1276.03	1898.9	1857.2	1968.86	2445.02	2222.47	2589.1	2599.36	2492.87	1849.59	1	0.908978	1.05893	1.06313	1.01957	0.756471	1	0.626236	1.24198	1.25921	1.08036
P09417	QDPR	Dihydropteridine reductase	258407	223709	241576	237897	214726	243494	219127	258843	237208	242892	220372	228107	242682	214369	250766	228744	222661	216043	206210	233787	245337	228610	222124	252320	247376	245290	261840	247732	289950	250406	235263	240313	231259	221489	239153	259044	1	1.02146	0.982981	0.941452	1.01654	1.10108	0	0.212336	-0.168372	-0.579222	0.163587
P62316	SNRPD2	Small nuclear ribonucleoprotein Sm D2	775662	742821	772608	697398	686949	809741	733247	825926	759566	812060	699083	733263	733638	689438	855197	706958	677200	667761	695982	742939	751157	731994	714349	804638	760360	757490	801723	758960	889088	797655	735088	788108	742124	698168	752500	800983	1	1.07213	1.00957	0.949776	1.02369	1.08964	0	0.804613	0.106777	-0.560271	0.26424
Q04637	EIF4G1	Eukaryotic translation initiation factor 4 gamma 1	324951	306103	334031	328571	329294	398793	362538	396761	368020	378341	352650	344901	344826	375643	396692	340318	322645	357463	321547	353675	350374	349670	318618	367823	357389	341709	336809	339930	342723	347303	324590	380890	362942	339129	348775	341695	1	1.17345	1.11816	1.04479	1.07451	1.0527	0	3.29151	2.24221	0.850028	1.41393
Q9H9C1	VIPAS39	Spermatogenesis-defective protein 39 homolog	11026.3	11308.9	10802.5	9131.41	10394.9	10791.1	11211.3	12058.9	10326.2	11735.3	10232	12004	11411.5	12058.6	11044.1	13028.8	11922.1	9995.11	11446	10693	11757.3	11740.8	11447.7	11264.9	9181.84	10756.2	12552.8	12417.2	12635.5	11615.3	10532.8	11224.6	11350	11417	11078.5	11995.4	1	1.06568	1.07759	1.08395	1.05181	1.13886	0	0.472973	0.558756	0.604541	0.373099
P78417	GSTO1	Glutathione S-transferase omega-1	790162	746978	787527	707878	703171	761862	671679	810732	696751	780680	690616	740478	736278	677641	792135	731884	739570	672652	694341	775960	811677	752335	723934	775397	753032	770100	837642	779440	912913	784925	747143	744341	727430	722881	763275	817004	1	0.996249	0.973615	0.967527	1.02159	1.0935	0	-0.0401149	-0.282182	-0.347288	0.230912
O76061	STC2	Stanniocalcin-2	37322.1	32935.9	32608.7	27812.5	26078.7	49109.5	43404.6	34355.8	34620.6	34104	32619.6	10742.8	21388.9	36379.8	45318.9	26317.1	40376.5	12371.3	43666.1	24593.7	6727.9	24230.6	10833.2	27928.4	40873.7	45027.1	30879.4	32191	40988.7	48479.9	31351.6	39118.9	29290	29464.9	22118.8	39513.2	1	1.24775	0.934242	0.939822	0.705506	1.26033	0	0.95169	-0.252599	-0.231165	-1.13125
Q9Y4K1	CRYBG1	Beta/gamma crystallin domain-containing protein 1	76735.5	71912	74724.4	65514.4	63624.5	66791.8	62828.6	78793	66834.7	74742.3	67198.9	72286	68182.7	65784.4	75792.9	70815.9	66957.7	61814.6	71539.7	71482.6	75660.1	70620	70632.3	80405.2	70743.8	74588.4	79137	73730.1	89349.3	76692.5	70502.2	69998.1	69849	68522.1	73612.3	78699.5	1	0.99285	0.990735	0.971915	1.04411	1.11627	0	-0.061493	-0.079681	-0.241548	0.379407
Q7Z6B0	CCDC91	Coiled-coil domain-containing protein 91	11068.8	12179.6	9945.91	14269.6	13344.6	12677	13043	16240.7	12955.4	13823.9	15062.7	14571.3	15032.5	14489.5	17858.3	11946	11607.3	11971.9	15465.9	15224.2	15913.4	12116.1	10839.8	15087.2	12437.6	12895.6	16678.4	12750.7	18773.5	14216.8	12161.7	13748	15402.8	13243.1	13278.8	15063	1	1.13043	1.2665	1.08891	1.09185	1.23856	0	0.54676	1.11713	0.37271	0.385032
P57768	SNX16	Sorting nexin-16	2186.29	53144.6	2804.97	2777.17	25170.4	2267.86	1636.41	2045.7	1714.36	1363.26	1089.8	45840.1	1724.67	2112.55	1708.79	2044.44	1900.07	1817.23	3875.37	4362.49	2338.78	1948.51	1810.15	2338.75	2103.32	1581.99	1966.86	2085.4	2469.39	2098.04	17216.7	1805.52	10495.2	2799.92	2107.9	2040.34	1	0.10487	0.609593	0.162628	0.122433	0.118509	1	-0.0154726	0.557106	0.0500505	0.00445183
Q9Y5L0	TNPO3	Transportin-3	158407	144407	157386	137095	135184	135175	116967	135646	134186	128679	136031	135304	141097	135469	125938	133236	143210	125458	127865	142601	150451	145186	134933	147812	114884	130127	141790	134201	137532	125419	146496	130131	134768	134474	138653	133814	1	0.88829	0.919943	0.917937	0.946466	0.91343	1	-0.290401	0.0752375	0.0520683	0.381612
A1Z1Q3	MACROD2	ADP-ribose glycohydrolase MACROD2	3491.34	2301.29	4377.76	5042.94	3947.6	2415.36	2380.03	4886.07	1495.67	3828.5	2965.64	3749.56	3637.57	3713.54	2910.1	4291.41	3203.34	3857.19	3875.87	2820.86	3972.99	4162.63	3488.71	3469.62	4333.49	2459.2	2712.33	2713.37	2750.11	3017.23	3832.19	3001.13	3395.28	3609.73	3885.49	2730.45	1	0.783136	0.88599	0.941951	1.01391	0.712503	1	0.245683	0.60344	0.798087	1.04838
Q15223	NECTIN1	Nectin-1	32252.6	31427.6	33579.8	26964.5	29288.7	31189.2	29359.3	32692.7	32624.3	31637.7	29829.8	30820.8	29900.7	28649.1	32045.6	31317.1	32639.4	28185.2	28040.6	30867.6	32149.3	31553.1	30026.8	32993.9	29549.3	32423.1	33884.6	33178.2	38805.3	33826	30702.6	31500.6	30249.2	30210	31254.5	34423.4	1	1.02599	0.985231	0.983953	1.01797	1.12119	0	0.214471	-0.121871	-0.132413	0.148308
Q68CQ4	UTP25	U3 small nucleolar RNA-associated protein 25 homolog	5685.98	5967.74	4730.19	5198.02	7251.98	6412.77	6208.42	5055.49	6878.51	7485.33	7284.26	6813.33	6352.77	7677.99	5968.82	7507.47	7079.26	9055.49	6927.31	7165.46	6925.53	6516.15	6808.66	5292.62	7543	7420.77	6244.33	6625.02	6685.79	8001.86	5766.78	6408.1	6819.43	7547	6617.19	6995.55	1	1.11121	1.18254	1.3087	1.14747	1.21308	0	0.521922	0.856668	1.44878	0.692082
Q86UA1	PRPF39	Pre-mRNA-processing factor 39	116764	119976	126932	124187	128936	129057	138590	141326	134571	145100	137056	131317	127653	141740	128478	127921	135824	138733	133343	150641	134673	138118	144579	143717	148830	133465	123070	133931	132754	136417	123359	137729	133249	137292	141983	131927	1	1.11649	1.08017	1.11295	1.15098	1.06946	0	1.67708	1.15424	1.62616	2.17362
Q99543	DNAJC2	DnaJ homolog subfamily C member 2	21694.2	29015.9	20678.3	24788.7	33875.8	33320.1	32703.7	30415.7	31670.8	35226.1	34039.4	23599.5	32456.7	32182.3	29469.4	29091.4	29465.8	38858.2	26747.5	29477.4	24901.1	28850.1	25705.2	23192.8	28167.3	33759.6	30528.5	31613	27417.9	33962.4	26010.6	32667.3	30349.5	30728.1	26163.3	31456.3	1	1.25592	1.16681	1.18137	1.00587	1.20936	0	1.22238	0.796757	0.866276	0.0280367
P31785	IL2RG	Cytokine receptor common subunit gamma	49725.3	64702.7	76076.9	69936.8	68694.6	46758.6	65305.8	77744	65848.8	74518.1	70467.1	74782.8	74556.2	62162	68451.5	76881.6	78049.6	73685.3	67248.8	76592.6	79409.8	78240.1	72059.5	82123.1	71277.6	72852.9	77449.7	73308.5	84456.5	74401.1	65827.3	66035	70083.9	74491.6	76622	76493.7	1	1.00316	1.06466	1.13162	1.16399	1.16204	0	0.0194806	0.399069	0.812293	1.01203
Q9NWV4	CZIB	CXXC motif containing zinc binding protein	70614.7	67670.2	69781.4	59209	59781.3	62433	62950.3	71228.5	65711.2	66261.1	64427.5	63904	64973	58634.2	65643.3	65993.8	68702.5	58267.4	64268.2	63252	68331.4	63285.3	59486.4	70692.1	67553.9	68996.5	74722.7	70622.7	81892.3	68728	65411.3	65716.8	63516.4	64096.8	65869.8	72992.4	1	1.00467	0.97103	0.979903	1.00701	1.1159	0	0.0402991	-0.249956	-0.173398	0.0604781
Q16204	CCDC6	Coiled-coil domain-containing protein 6	404571	388612	385911	378573	347124	422702	364378	436808	404934	430395	368107	386418	380935	363295	408301	381730	367690	342506	359120	407022	410449	385096	368071	443371	414078	406119	421199	388573	474021	401512	380958	411843	381411	371614	404213	418285	1	1.08107	1.00119	0.975471	1.06104	1.09798	0	0.827421	0.0121339	-0.250348	0.623003
Q9BPX5	ARPC5L	Actin-related protein 2/3 complex subunit 5-like protein	706352	713737	696353	674688	711694	670347	640784	734206	742749	708053	677727	742422	694041	604429	706487	704930	719022	646153	683270	714639	736102	736238	661750	779092	708138	705819	749996	725182	813908	745212	700565	699228	685021	693603	724264	748023	1	0.998091	0.977813	0.990062	1.03383	1.06774	0	-0.0281767	-0.327516	-0.146697	0.499367
Q9P2E9	RRBP1	Ribosome-binding protein 1	71549.8	67239.8	65529.7	63869.6	63151.7	73634.5	64194.6	71402.9	69982.5	74467	61340.3	68068.5	63308.6	63812.9	77320.2	63319.7	66991.4	64894.8	66697.6	68057.8	68042.7	63966.1	66889.2	75215.5	68736.7	70707.8	73415.7	65693.1	78929.9	73480	66268.1	70736.3	66770.1	65992.3	68570.1	72445.3	1	1.06743	1.00758	0.995838	1.03474	1.09322	0	0.72334	0.0812696	-0.0446542	0.372653
Q9NUQ9	CYRIB	CYFIP-related Rac1 interactor B	62120.2	56363.2	54869.9	52858.9	53435	46972.9	46221.1	47860.1	47780.5	42906.8	43443.1	48249.2	50235.1	44531.1	43424.2	55833.7	51165.6	54840.4	49551.5	42994.8	51786.8	53699.6	53765.1	53108.7	49442	42218	49991.4	46805.2	60406.6	44254.2	55929.4	46348.3	45976.5	50877.2	52360.4	48735.1	1	0.828692	0.822045	0.909668	0.936187	0.871367	1	-0.331762	-0.383432	0.29775	0.503914
Q71DI3	H3C15	Histone H3.2	3388.62	7123.97	2616.1	3503.97	1041.77	697.36	1376.73	2314.65	2607.05	1837.81	2459.05	1092.54	500.589	876.876	401.776	568.896	1241.62	528.689	1712.24	491.324	1786.36	677.879	4579.5	822.417	2509.8	4451.92	1220.06	519.51	1133.83	482.794	3534.89	1766.72	1066.17	908.553	2075.19	1561.62	1	0.499795	0.301612	0.257025	0.58706	0.441774	1	0.103938	-0.251085	-0.330959	0.260263
P35606	COPB2	Coatomer subunit beta'	369542	352615	373247	370799	374112	397894	375110	414486	384740	412512	361385	395296	383206	373922	388098	371558	387013	397728	376977	395849	394906	395039	375649	415345	389788	383779	379109	380013	402371	390618	368063	396948	380381	385825	394145	387178	1	1.07848	1.03347	1.04826	1.07086	1.05193	0	1.51114	0.644437	0.929215	1.36451
Q8IXZ2	ZC3H3	Zinc finger CCCH domain-containing protein 3	1836.89	1785.58	1126.75	858.03	1048.04	1913.21	1451.84	2171.8	2240.51	2763.4	2816.8	2334.34	2838	1688.53	1377.17	1968.88	1636.31	1691.81	1154.39	1535.1	1537.62	1568.16	1206.85	1127.82	1322.51	1487.61	2082.21	2401.36	2212.59	1544.21	1331.06	2108.15	2210.97	1597.3	1352.59	1945.59	1	1.58382	1.66106	1.20002	1.01618	1.46169	0	1.26452	1.43182	0.433241	0.0350415
Q8IU81	IRF2BP1	Interferon regulatory factor 2-binding protein 1	148818	142299	142098	138759	132091	157440	149679	163275	150951	164635	135456	142878	134967	146163	171809	142063	135014	131056	134140	154606	151179	148562	139381	160608	154919	145679	159025	143845	167426	148145	140813	157196	146254	139376	150930	152824	1	1.11635	1.03864	0.989794	1.07185	1.0853	0	1.36401	0.453051	-0.119646	0.842329
P20742	PZP	Pregnancy zone protein	1412.73	1344.35	1607.25	1710.06	1597.65	1611.72	1327.45	1319.16	1187.23	1670.79	1655.51	967.825	1588.01	1414.56	1878.27	820.689	803.748	1543.99	733.358	930.851	1406.82	1307.7	1924.7	1944.62	1266.66	1324.22	935.863	1388.69	1168.4	999.818	1534.41	1423.27	1500.84	966.528	1570.1	1163.4	1	0.927568	0.978119	0.629901	1.02326	0.758204	1	0.700441	0.909507	-0.530625	1.09618
Q4G0F5	VPS26B	Vacuolar protein sorting-associated protein 26B	28586.2	26593.4	25613.1	27296.7	24150.3	25826.2	24600.8	23920.3	22350.1	23039.7	24610.8	25600.5	25433.9	27122.1	22300.7	26258.8	27404.7	27427.4	24105.3	25220.1	25974.2	26643	26382.1	26458.5	22684.1	23907.3	24780.6	22862.1	24722.7	24260.3	26448	23947.4	25013.6	26083.3	25628.4	24106.6	1	0.905455	0.945767	0.986211	0.969013	0.911473	1	-0.0679725	0.387387	0.844244	0.649968
Q9UPU7	TBC1D2B	TBC1 domain family member 2B	9235.56	11697	10300.1	7742.13	10034.9	12061.9	11903.1	10640	10613.7	12354.3	11638.2	10465.6	12589.3	12018.2	11843.2	12078.7	11119.3	10603.1	10313.2	10663.5	12371.8	11050.6	11670.1	11188.6	9472	11686.1	12245.5	9407.6	14703.8	12648.6	9801.95	11514.6	11710.9	10955.6	11150.6	12138.3	1	1.17472	1.19475	1.11769	1.13759	1.23836	0	0.733034	0.817058	0.493762	0.577252
Q9UN81	L1RE1	LINE-1 retrotransposable element ORF1 protein	5435.6	6896.98	5643.22	5318.3	5861.78	5889.48	4962.38	6202.05	5621.37	5072.37	6052.56	5930.64	6603.47	6236.59	5949.8	5488.25	5827	6436	6711.96	7180.95	6936.68	6450.42	6742.11	6794.93	5849.4	6622.88	6734.47	6677.74	6990.05	6567.89	5831.18	5549.53	6154.61	6328.83	6554.71	6718.61	1	0.9517	1.05547	1.08534	1.12408	1.15219	0	-0.317374	0.364461	0.560784	0.815315
O43291	SPINT2	Kunitz-type protease inhibitor 2	8536.74	10795	9061.5	9932.01	8956.42	10595.8	9962.72	11677	10066.7	12157.2	9512.05	10445.5	9511.2	10270.3	10608.8	10360.6	9056.08	8985.85	8030.59	10309.9	10257.1	10642.5	9132.34	10884.4	11307.1	10808.7	10862.3	9600.03	11279.2	11758.8	9456.34	10891.9	10069.6	9348.6	10444.7	10861.8	1	1.15181	1.06485	0.988607	1.10452	1.14863	0	1.02141	0.436321	-0.0766584	0.703221
Q13535	ATR	Serine/threonine-protein kinase ATR	5088.95	7363.56	4285.98	6919.32	9056.01	8234.55	10457.5	7634.11	10717.5	14436	8736.29	5312.57	9705.03	9885.47	9149.44	7994.21	8666.85	11949	4645.26	10166.7	9426.36	8053.67	8505.65	9989.8	10094.2	8615.43	10315.5	9353.04	6120.82	10908.8	6542.76	10295.9	8557.76	8684.4	9213.94	9062.71	1	1.57364	1.30797	1.32733	1.40826	1.38515	0	1.48939	0.799621	0.849874	1.06002
P46937	YAP1	Transcriptional coactivator YAP1	111929	105258	107219	101746	96599	109958	97065.9	106033	98212.2	109498	99420.1	100142	91402.4	104028	112893	96653.3	99040	89949.9	102650	112324	114342	106148	87134.7	108927	104376	109726	117462	107250	125457	110350	104550	104153	101577	100124	104185	114049	1	0.996204	0.971564	0.95766	0.996511	1.09085	0	-0.0417773	-0.31299	-0.466019	-0.0383992
P35226	BMI1	Polycomb complex protein BMI-1	2465.03	2924.38	2184.57	4074.69	3439.86	3882.38	3966.65	3498.23	3420.86	4172.87	3544.3	3118.88	4398.2	4029.93	3084.36	3421.61	3821.78	5067.8	4552.02	3740.78	2873.25	5780.11	4191.43	4037.97	4885.61	3532.77	3115.71	3837.48	4905.58	6051.75	3017.71	3788.2	3635.13	4120.8	4353.67	4288.66	1	1.25532	1.2046	1.36554	1.44271	1.42117	0	0.606233	0.4858	0.867926	1.05115
Q8IYD1	GSPT2	Eukaryotic peptide chain release factor GTP-binding subunit ERF3B	23989.9	16757.4	16285.5	21677.9	16685.9	11560.2	11179	12010.7	14621.7	13050	15901.8	15883.2	19202.6	14437.2	14258.1	15086.7	16048.3	15815.6	18305	14877.4	15247.4	13901	16406.2	13129.1	15097.4	17620.4	10605.3	16976.3	12504	16421.8	19079.3	12484.3	15936.6	16026.6	14756.2	14825.6	1	0.654338	0.835281	0.84	0.773416	0.77705	1	-0.550398	0.261183	0.282351	-0.0163004
Q92841	DDX17	Probable ATP-dependent RNA helicase DDX17	96181	96887	88039.8	102285	107249	111412	113086	110091	110365	120986	102777	104375	102352	113435	116644	98787.1	102974	128385	102697	122499	101713	107688	102592	111080	116187	112270	98801.9	107468	104440	121901	98128.5	113188	107917	111068	107852	108976	1	1.15347	1.09975	1.13187	1.09909	1.11055	0	1.38827	0.902331	1.19289	0.896377
O75362	ZNF217	Zinc finger protein 217	48160.5	49283.7	45567	49839.7	51003.2	50431.4	52343.9	54495.4	48569.6	56142.4	51073.7	51332.7	48607.2	50128.4	48418.1	50585.2	50082.4	52030.2	42223.6	53606.3	49933.2	53259.1	45203.2	53698.9	57051.8	50340.7	51289	53814.7	52166	54123.4	48770.8	52396.5	49912	49705.5	51829.2	52346.8	1	1.07434	1.0234	1.01916	1.06271	1.07332	0	1.01392	0.31913	0.261384	0.855274
Q9BYX2	TBC1D2	TBC1 domain family member 2A	1769.92	1216.03	799.947	1108.72	896.533	1236.09	1810.18	1588.38	1727.49	1610.47	1540.17	1201.58	1418.15	1396.06	1963.97	1246.73	1964.53	1665.54	1225.21	1275.94	2085.69	1150.84	1733.79	834.651	2402.52	1549.69	1819.79	1237.23	2342.25	1560.13	1158.23	1594.52	1503.99	1475.59	1641.5	1701.82	1	1.37669	1.29852	1.274	1.41725	1.46933	0	0.802616	0.636064	0.583824	0.889032
Q9Y4L1	HYOU1	Hypoxia up-regulated protein 1	133197	134201	137405	140067	150340	131295	137767	138952	139251	142891	151068	143411	140493	142466	140511	144839	151659	163464	143133	162525	147995	147753	145702	143804	149734	154999	141114	148291	144814	166162	139042	138031	143590	153124	146998	151076	1	0.992731	1.03271	1.10128	1.05722	1.08655	0	-0.0839816	0.377908	1.17018	0.661102
Q7L2J0	MEPCE	7SK snRNA methylphosphate capping enzyme	159564	138485	144862	145200	136024	176832	160504	166333	166040	170566	140822	155243	153413	153332	168080	156227	141337	144828	142734	161180	148908	152918	148456	172808	153532	153063	153175	149303	168350	160328	144827	168055	154178	149261	155325	156844	1	1.16038	1.06457	1.03062	1.07248	1.08297	0	1.93297	0.778171	0.369003	0.873591
Q9H098	FAM107B	Protein FAM107B	29746.6	27665.3	29087	23485.6	26005	28114.9	26065.7	32856.6	27272.7	28762.6	24010.3	29710.6	26864.7	24426.2	28929.4	27591.5	26338.3	25926.1	25441	28631.8	31480.9	28774.5	26049.7	31500.5	29973.6	29210.1	30526	28561.6	34922.1	30505	27197.9	28614.5	26788.3	26785.7	29555.9	30744.9	1	1.05208	0.984938	0.984845	1.0867	1.13042	0	0.399372	-0.11549	-0.116201	0.664767
Q6IQ49	SDE2	Splicing regulator SDE2	27518.1	25633.9	25662.6	28755.3	24563	29616.5	25853.3	29451.4	28002.6	29826.8	25492.3	27861.8	27265.9	27766.8	30832.1	25829.6	26421.1	23535.6	29061.4	27519.8	26361.6	28443.6	25795.2	29065.9	26479.3	27367.1	30848.3	27425.8	33107.1	28869	26426.6	28550.1	27843.8	26473.5	27229.1	29523.5	1	1.08036	1.05363	1.00178	1.03037	1.11719	0	0.685709	0.457621	0.0151559	0.259147
Q6H8Q1	ABLIM2	Actin-binding LIM protein 2	1057.88	1454.89	2238.31	1688.11	1710.08	698.331	1130.23	1248.33	445.966	1802.22	1467.86	1811.21	925.382	913.04	1720.6	1013.29	2171.21	1254.58	993.831	1537.65	1990.41	1492.74	1283.6	1407.66	731.237	1429.12	768.135	782.485	989.645	1427.45	1629.86	1065.02	1367.62	1394.11	1381.13	1079.37	1	0.653442	0.839103	0.855358	0.847393	0.662247	1	-0.0260688	0.523627	0.571753	0.548171
Q9Y646	CPQ	Carboxypeptidase Q	4491.73	3726.95	3485.35	3623.18	1238.82	731.148	874.438	3372.17	346.807	1422.65	2003.83	1565.49	2579.78	826.799	1276.34	5076.35	1858.98	1397.42	877.581	298.058	1446.91	1630.27	2684.16	1873.95	1880.78	1099.26	2502.7	658.842	2126.13	2226.44	3313.2	1349.44	1650.45	1901.68	1903.21	1722.67	1	0.407293	0.498142	0.573969	0.574433	0.519942	1	-0.234657	-0.0454103	0.112543	0.11351
Q9UNE7	STUB1	E3 ubiquitin-protein ligase CHIP	47586.6	52941.7	47594.7	54619.8	65772.4	54999.2	76848.2	67107.1	72421.6	78769.7	53315.9	64256.1	73992.7	91588.2	68067.8	73884.6	53352.3	76365.2	59577.9	60677.3	62462.9	65572.5	79035.4	77145.8	77165	49684.7	57390.3	75773.4	75601.1	75881.7	53703	70029.2	70244.1	64771.5	72276.3	66866.2	1	1.30401	1.30801	1.2061	1.34585	1.24511	0	1.24029	1.25662	0.840863	1.411
Q92844	TANK	TRAF family member-associated NF-kappa-B activator	9082.94	9093.56	8422.97	7575.55	7393.21	8713.94	9148.15	9682.84	2197.3	9862.94	7887.2	8215.45	8155.95	8274.58	8401.26	9047.7	8535.7	7680.36	7896.36	8085.43	9437.96	9307.52	7193.87	10607.1	9443.64	9201.4	10121.1	9162.46	10667	8849.52	8313.65	7921.03	8186.89	8249.11	9198.03	9600.3	1	0.952775	0.984753	0.992237	1.10638	1.15476	0	-0.305143	-0.0985168	-0.050158	0.687352
A6NM62	LRRC53	Leucine-rich repeat-containing protein 53	1805.9	1940.9	2645.27	1084.94	1212.57	2124.41	2324.79	1994.12	3340.04	2727.77	2665.32	2304.68	2025.89	2217.47	1224.05	2010	1859.12	3330.79	3126.26	1745.03	2621.09	1934.46	3030.57	1500.43	1369.02	2439.22	2354.04	3289.82	1961.04	2379.01	1737.91	2502.23	2087.48	2414.24	2091.11	2484.63	1	1.43979	1.20114	1.38916	1.20323	1.42966	0	1.02357	0.46814	0.905736	0.473004
Q6PKG0	LARP1	La-related protein 1	107780	106782	103444	95581.7	97755	101916	97014.3	107078	99096	104166	105869	109992	103622	108024	97934.3	104879	106786	103349	105768	111993	104661	105463	100742	112190	111729	111734	108812	104836	114068	108795	102269	101854	105088	106555	106957	109649	1	0.995947	1.02757	1.04191	1.04585	1.07217	0	-0.0561579	0.382046	0.580778	0.635244
Q96H20	SNF8	Vacuolar-sorting protein SNF8	85566	69745.9	72970	70532.2	65079	65406.6	58792.4	67549.1	61557.4	63073	66482.8	70586.2	69708	71574.4	61433.8	72310.5	72101.6	69554.2	73911	72627.1	73347.7	72641.3	67604.7	75258.8	61489.8	63844.3	63810.8	66845.2	70298.4	58136.5	72778.6	63275.7	67957	72100.9	70068.5	64587	1	0.869427	0.93375	0.990688	0.962762	0.887445	1	-0.160081	0.411399	0.917266	0.669155
P25325	MPST	3-mercaptopyruvate sulfurtransferase	77163.2	83027.3	79677.6	83843.8	84389.4	91475.8	89410.9	90038.5	92092	91678.2	88173.2	87673.8	90568.8	98687.1	88929.3	85279.8	89170.8	98848.4	87051.9	95075.5	86446.9	91061.3	89899.6	92125.2	92632.9	89116.7	84685.8	83646.1	86890.4	92081.2	81620.3	90939.1	90806.4	91085.3	90433.2	87284	1	1.11417	1.11255	1.11596	1.10797	1.06939	0	1.64534	1.62192	1.67115	1.55602
Q9UQN3	CHMP2B	Charged multivesicular body protein 2b	85018.1	82540.8	84167.9	77871.4	71748.4	85500	80966.8	90781.5	82028.1	90831.6	75185.6	81389.2	75874.9	78338.9	91548.6	76731.8	74403.9	70430.2	73800.9	78556.6	83466.4	77252.3	78181.8	89132.2	84612.3	83491.3	89000.1	83008.2	95980.7	88346.9	80269.3	86021.6	80467.4	74784.7	82529	87965.4	1	1.07166	1.00247	0.931672	1.02815	1.09588	0	0.747429	0.0257467	-0.712646	0.293614
Q6I9Y2	THOC7	THO complex subunit 7 homolog	23379.2	16941.3	21102	17377.4	21037.2	23728.5	20266.3	22507.6	20179.7	26216.5	20604.1	22706.7	22292.3	21083.9	22991.2	21740.3	21828.2	21872.8	20464.8	22493	21494.3	21750.7	20128.7	23276.3	21073.2	22005.1	21849.8	21238.3	26198	25537.8	19967.4	22579.7	21935.6	21679.8	21544.6	23365.8	1	1.13083	1.09857	1.08576	1.07899	1.1702	0	0.768683	0.579164	0.503882	0.464108
P26440	IVD	Isovaleryl-CoA dehydrogenase, mitochondrial	649589	608048	665848	580910	578327	593777	585602	689484	592089	644584	568025	619150	602623	581873	638795	609508	615116	558358	604423	621476	653562	631923	604346	698012	637309	629639	674366	648602	762009	666575	616545	621107	602093	601776	645030	676238	1	1.0074	0.976561	0.976046	1.0462	1.09682	0	0.0764332	-0.242094	-0.247409	0.477201
P30044	PRDX5	Peroxiredoxin-5, mitochondrial	6728865	6.08676e+06	6.47521e+06	5905853	5646853	5.7171e+06	5254223	6252274	5614436	6137115	5898293	6192900	6150644	5.65545e+06	6332689	6396798	6.3204e+06	5.52732e+06	5960935	6226381	6.33116e+06	6225138	5.93555e+06	6802146	6.14113e+06	6.47154e+06	6758113	6.50944e+06	7.45749e+06	6557400	6.16871e+06	5.79503e+06	6.04599e+06	6.08637e+06	6.28703e+06	6.75079e+06	1	0.939424	0.980107	0.986652	1.01918	1.09436	0	-0.641962	-0.210815	-0.141457	0.203265
Q9NYQ6	CELSR1	Cadherin EGF LAG seven-pass G-type receptor 1	1885.51	2373.64	2315.84	2108.03	1823.78	1538.48	1505.16	1642.78	1284.31	1907.21	1941.73	1256.09	1556.67	1242.09	2747.32	1394.43	1142.23	1144.34	2267.63	2493.02	1769.72	1048.63	2346.23	2878.54	3491.32	1053.84	1511.33	1841.4	2140.93	1209.67	2101.36	1575.59	1748.78	1688.33	2306.89	1551.43	1	0.749795	0.832214	0.803448	1.09781	0.7383	1	0.043924	0.358859	0.24894	1.37374
P51511	MMP15	Matrix metalloproteinase-15	8389.29	3869.42	6765.7	5364.17	8836.84	9818	8464.35	5723.57	3918.61	7589.73	7826.87	9769.91	8610.23	5044.62	9395.06	6750.24	6201.18	10087.7	10214.3	6336.98	9925.23	8452.36	8377.7	8337.89	8400.46	9601.02	7641.61	9308.81	7971.01	9578.39	6645.08	7102.85	8129.34	7918.08	8698.73	8820.17	1	1.06889	1.22336	1.19157	1.30905	1.32732	0	0.21046	0.68239	0.585264	0.944168
Q9Y265	RUVBL1	RuvB-like 1	446682	417419	428482	412859	396446	396879	382481	420010	389990	429873	408205	409141	426593	389030	426120	428821	445656	398249	388333	429776	438625	433675	416533	440204	394071	437072	439432	447110	485831	437945	420378	403847	411818	418167	424622	449478	1	0.960676	0.979638	0.994741	1.0101	1.06922	0	-0.568066	-0.294139	-0.0759708	0.145837
Q8N9U0	TC2N	Tandem C2 domains nuclear protein	25546.4	27267.7	17332.7	23259.1	24733.3	24114.6	22647.5	30716.3	31073	27318	26161.9	26677.9	25845.5	25133.1	23879.2	25420	22465.9	26651.6	23902.5	22713.5	25029.8	25660.1	23186.5	26788.3	23650.5	29942.3	25017	31113.7	27830.4	26424	23627.9	27173.9	25539.5	24230.7	24863	28065.5	1	1.15008	1.08091	1.02551	1.05228	1.18781	0	0.79908	0.430784	0.135847	0.278345
P61026	RAB10	Ras-related protein Rab-10	37336.6	39520.1	44589.5	34331.2	32617.1	41925.4	40109.7	36868.7	37423.8	34172.7	36397.7	33540.5	35979.8	38606.6	34728.1	38414.1	34910.3	35489.9	37442	32372.6	36572.3	35649.9	39825.3	32802.9	33504.5	31208.2	36085.3	35625.2	29586.8	30125.3	37678.9	38100.1	35850.5	35725.8	35671	32526.2	1	1.01118	0.951475	0.948164	0.946709	0.863246	1	1.08174	0.645169	0.620956	0.610316
P54868	HMGCS2	Hydroxymethylglutaryl-CoA synthase, mitochondrial	391701	384396	384403	436938	438401	387926	424253	443300	414612	403729	429920	419033	436736	461547	401215	412654	456434	494731	448063	450617	401690	423598	412737	410121	409188	463854	428918	455500	404534	470610	407168	414764	429690	452500	411467	444683	1	1.01866	1.05532	1.11134	1.01056	1.09214	0	0.202485	0.600352	1.20836	0.11459
Q13825	AUH	Methylglutaconyl-CoA hydratase, mitochondrial	6611.38	8173.19	6435.11	6379.02	8125.4	7514.53	9453.2	8159.49	10295.2	7833.32	9920.64	7576.09	8934.29	8682.4	7598.28	9235.93	8801.73	9152.14	8693.47	8898.31	7153.22	8367.81	9359.79	6538.54	8465.76	8537.76	7910.99	8440.04	7574.21	9774.31	7144.82	8651.14	8542.34	8956.31	7977.03	8447.46	1	1.21083	1.1956	1.25354	1.11648	1.18232	0	1.15636	1.07284	1.39063	0.638861
Q8IZL8	PELP1	Proline-, glutamic acid- and leucine-rich protein 1	16636.3	13881.1	13628.3	13471.6	16217.3	14301	15594.6	12175.6	16096.3	14991.7	15588	12269.2	15462.9	15336.5	10356.5	14669.7	15912.9	15536.9	14578.6	18449.9	15328.5	14632.8	11994.9	12022	13158.9	15108.6	12768.7	11684.9	11895.9	12199.7	14766.9	14631.8	13802.6	15829.6	13427.4	12731.6	1	0.990852	0.934699	1.07196	0.909291	0.862168	1	0.93363	0.526232	1.52211	0.341892
O60437	PPL	Periplakin	106381	104400	108151	101356	94040.2	100427	101428	112152	105511	115317	95472	98850.4	96230.5	97094.2	110506	104128	103521	94066.9	94746.3	99265.1	109189	107065	101076	106601	102304	106630	110622	108453	121082	109263	102866	106967	99630.6	99145.4	105247	111210	1	1.03987	0.968552	0.963834	1.02315	1.08112	0	0.491526	-0.387685	-0.44584	0.285395
Q96JJ3	ELMO2	Engulfment and cell motility protein 2	3699.47	5479.49	1327.2	2817.68	5145.03	7510.87	6331.66	6559.02	5742.55	5805.31	6137.65	5450.11	4810.66	6399.35	5689.19	5912.4	6498.33	6803.56	3623.08	4176.9	4258.56	1524.05	5482.24	5293.32	3713.99	4531.81	6050.06	5506.71	5973.84	5707.23	3693.77	6389.88	5697.39	5402.86	4054.43	5553.93	1	1.72991	1.54243	1.46269	1.09764	1.50359	0	1.4494	1.07712	0.918784	0.193885
Q86U86	PBRM1	Protein polybromo-1	7647.86	15408.1	15084.8	13674.1	14324	14810.7	14462.9	15503.3	14304.3	15312.2	16975.1	17335	14742.4	16262.1	14372.3	17600.3	17865.4	19613.6	15184.6	9194.74	18732.3	17533.2	16697.9	17573.4	15563.7	15422.3	15994.8	16897.9	16851.7	19246.5	13227.8	14878.7	15937.4	15891.8	17220.1	16882.6	1	1.1248	1.20484	1.20139	1.30181	1.2763	0	0.451699	0.741372	0.728883	1.09233
Q9HCJ3	RAVER2	Ribonucleoprotein PTB-binding 2	2988.66	3473	3910.88	2002.93	3579.56	3982.88	2920.94	2603.02	2100.23	2567.78	1905.45	2546.81	2285.08	2682.23	1964.21	2184.28	3222.81	2627.4	3325.89	3355.06	4002.08	4330.75	3668.79	3026.87	3508.02	1695.27	2258.86	2762.29	2805.7	1749.62	3191.01	2834.97	2276.76	2943.09	3707.3	2254.35	1	0.888425	0.713492	0.922308	1.1618	0.70647	1	0.619885	0.0239223	0.735318	1.55121
Q9NZN5	ARHGEF12	Rho guanine nucleotide exchange factor 12	29630.2	30860.3	28438.3	24999.2	27470.6	30219	27487.8	33692.1	30283.6	33567.4	29020.8	30755.8	26081.9	32139.5	34044.8	29569	31421.1	27328	30846.4	28506.6	33111.5	31502.9	28639.5	32870.7	30515.4	28809.6	32637.9	30838.5	36316.1	30661.7	28279.7	31050	30408.5	29534.2	31328	31852.8	1	1.09796	1.07528	1.04436	1.10779	1.12635	0	0.775326	0.595801	0.351106	0.853133
Q9H7C9	AAMDC	Mth938 domain-containing protein	54258.9	51511.1	57571.5	50757.4	47975.9	53685.3	46406.8	57195.4	50191.3	58762.3	48752.8	54192.9	53489.2	51309.3	55501.3	51755.1	52879.7	46980.7	49041	54893	57192.6	54998	52376	61754.5	56162.3	57243.8	59175.4	53718.4	65459.7	54957.1	52415	53248.2	52649.1	51109.9	56496.7	58110.9	1	1.0159	1.00447	0.975101	1.07787	1.10867	0	0.146289	0.0411072	-0.229125	0.716604
Q15014	MORF4L2	Mortality factor 4-like protein 2	6951.37	4630.91	6998.27	6244.35	6996.37	5979.45	5808.76	7223.33	6736.13	5196.51	6371.44	5357.52	5712.06	5879.81	6524.01	5218.98	4943.09	6145.39	4953.46	6313.2	6288.13	5127.8	5364.02	5693.12	5028.77	5193.58	6199.81	4321.4	5103.14	4478.03	6364.25	6188.84	5968.97	5514.82	5500.37	5059.19	1	0.972437	0.93789	0.866531	0.86426	0.794939	1	0.865587	0.697113	0.349128	0.338052
Q96RU3	FNBP1	Formin-binding protein 1	721733	776890	807030	707588	552470	536308	522343	404387	489385	492608	584322	608271	591245	609884	390355	634740	689562	562445	307500	305056	468329	804994	625079	492446	689862	608894	564604	553908	424413	743334	713142	489006	556815	499860	616142	579031	1	0.685706	0.780791	0.700927	0.863982	0.811943	1	-0.671266	-0.165648	-0.590332	0.276718
Q13889	GTF2H3	General transcription factor IIH subunit 3	9996.06	5506.58	7783.12	14607.6	7861.71	6956.96	6648.8	9156.04	7858.54	5994.53	5528.86	6613.63	6335.18	7580.64	6363.81	7255.53	7006.79	8523.66	7647.42	7565.28	6589.65	7375.7	7435.26	6853.82	8089.2	6452.08	5918.51	5437.06	6146.12	7213.3	9151.02	7322.97	6484.43	7599.74	7268.73	6233.41	1	0.800235	0.708601	0.830479	0.794307	0.681171	1	0.373443	0.0860342	0.468302	0.35485
Q8TBB5	KLHDC4	Kelch domain-containing protein 4	35298.5	34117.4	35715.3	31993.4	27075.7	35541.9	34015.9	38000.7	34558.3	37615.9	32565.7	36615.3	32971.2	34105.1	37104.3	32842.1	31599.9	32079.5	31367.5	34817.5	37553.1	34419.1	34083.9	39597.2	32954	34249.6	38442.2	36057.2	41282.8	36119.7	32840	35946.5	34672.3	32541.3	35721.5	37230.3	1	1.09459	1.05579	0.990904	1.08774	1.13369	0	0.707591	0.417352	-0.0680413	0.656326
Q9P013	CWC15	Spliceosome-associated protein CWC15 homolog	102937	107216	112374	89624.6	95088.7	109555	106499	111101	102516	115655	92373.8	106003	95577.1	104336	115227	111404	97887.8	96219.7	101120	102034	116626	106999	101933	109860	97938.9	105617	113503	110131	122250	108741	101448	109065	102703	101733	106671	112048	1	1.07508	1.01237	1.00281	1.05149	1.10449	0	0.718556	0.118418	0.0268674	0.492752
Q7Z5J4	RAI1	Retinoic acid-induced protein 1	8873.69	9212.01	7610.4	7744.46	7269.98	10650.1	10012.3	11897.3	10178.1	10315.8	9060.46	10385.1	8677.42	9882.36	11219	9142.3	8067.77	7634.08	8864.9	9992.13	11027.2	9821.85	9194.03	10491.9	10784.4	9154.75	10524.9	8812.57	10325	8569.35	8142.11	10610.7	9844.88	8740.23	10263.9	9477.31	1	1.30319	1.20913	1.07346	1.26059	1.16399	0	1.84886	1.27529	0.447965	1.58908
Q96SI9	STRBP	Spermatid perinuclear RNA-binding protein	564067	608229	560271	680073	558488	605858	593156	649211	621613	675798	553429	615245	553250	526976	650254	556392	519732	452170	604320	600947	621375	621115	598255	612536	572286	651414	628047	649491	623779	680105	594225	629127	579831	546712	605113	646567	1	1.05873	0.975776	0.920042	1.01832	1.08808	0	0.666807	-0.275009	-0.907751	0.208014
Q9UIV1	CNOT7	CCR4-NOT transcription complex subunit 7	29652.4	30647.3	28842.2	27421.8	30127.9	28156.8	29649	31281.3	30817.1	28594.8	30166.1	29166.6	30811.6	27673.8	27847.5	31783.9	31985.6	30805.8	33550.2	28326.7	31605.1	31549.4	29397.8	27851.8	26521.5	27139.5	26982	28115	27299.1	26373.8	29338.3	29699.8	29133.1	31290.4	29385.1	27181.9	1	1.01232	0.993005	1.06654	1.00159	0.926497	1	1.16762	0.904833	1.90523	1.0217
P62068	USP46	Ubiquitin carboxyl-terminal hydrolase 46	7523.96	7007.59	6110.6	6528.05	6441.05	6530.23	5362.77	5486.81	5280.68	6040.94	6387.32	6507.68	5651.97	6385.06	6049.86	6925.4	6707.54	7054.98	6349.38	6239.62	5050.93	6595.04	7444.6	5825.17	6154.31	5070.16	4858.9	5655.76	6757.95	6053.9	6722.25	5740.29	6196.38	6655.39	6214.01	5679.33	1	0.853923	0.921771	0.990053	0.924394	0.844856	1	0.058443	0.495767	0.935887	0.512674
Q9NXV6	CDKN2AIP	CDKN2A-interacting protein	315109	301195	299422	304195	286470	303012	293316	339029	311474	333636	282100	294328	288778	285420	319410	312116	300823	280940	270306	289731	303813	300701	312944	317813	295635	311650	334087	303808	362857	317661	301278	316093	294007	290783	306181	326013	1	1.04917	0.975865	0.965164	1.01627	1.0821	0	0.598963	-0.293977	-0.424323	0.198223
Q14249	ENDOG	Endonuclease G, mitochondrial	1730.31	619.069	1764.18	2502.44	1147.09	1832.02	1370.62	576.049	2158.53	2234.7	1414.77	3897.85	1114.06	1025.93	1324.14	1167.25	996.404	2048.77	3026.88	2676.57	2964.41	2680.1	2176.26	2013.39	2548.99	958.251	390.804	8.74325	406.161	770.07	1552.62	1634.38	1755.35	1983.17	2476.63	506.806	1	1.05266	1.13057	1.27731	1.59513	0.32642	1	1.07818	1.19385	1.4117	1.88354
Q5TZA2	CROCC	Rootletin	44958.6	43018.8	49296.9	43548.8	41995.5	47144.6	43186.7	50736.5	47483.9	47795.9	42594.8	46595.4	47152.4	45138.1	48678.6	44649.4	43331.5	42894.4	47117	43104.9	49860.7	50104.6	45395.3	49844.3	45641.5	46909.4	48323.1	46675.6	52953.5	48119	44563.7	47269.5	46031.9	44219.4	48169.3	48596.1	1	1.06072	1.03294	0.992274	1.08091	1.09049	0	0.671016	0.364085	-0.0853793	0.894144
Q8NBS9	TXNDC5	Thioredoxin domain-containing protein 5	1.23153e+06	1174460	1.23511e+06	1.12584e+06	1.11031e+06	1.25379e+06	1149590	1.30498e+06	1.23454e+06	1.26117e+06	1.10464e+06	1.1959e+06	1.15305e+06	1.06243e+06	1.33867e+06	1.12633e+06	1109226	1056399	1.09805e+06	1.21541e+06	1.31286e+06	1231619	1.13894e+06	1.25628e+06	1.26935e+06	1.21797e+06	1.32635e+06	1.21452e+06	1.42141e+06	1.21338e+06	1.17545e+06	1.24081e+06	1.17094e+06	1.12108e+06	1.24181e+06	1.27873e+06	1	1.05561	0.996162	0.95375	1.05646	1.08786	0	0.632912	-0.0436836	-0.526389	0.642567
O00204	SULT2B1	Sulfotransferase 2B1	59838.8	63234.1	56588.2	64198.4	73448.2	66160.7	70702.8	68135.4	67713.1	73790.1	75164.6	70911.3	72153.6	78047.1	67887.5	67536	70123.1	83774.1	64269.3	79683.4	68079.3	72717.9	68358.1	66511.9	74849	73110.1	67206.1	70179	66698.8	73821.5	63461.5	69300.4	72832.8	73077.2	70103.2	70203.1	1	1.09201	1.14767	1.15152	1.10466	1.10623	0	0.866101	1.39008	1.42632	0.985188
Q6EMK4	VASN	Vasorin	9306.04	10702.4	8849.1	9648.69	9706	10117.7	10003.6	11508	9517.41	10491.3	9548.17	8666.08	9508.11	9406.09	10343.7	10152.4	8314.55	9308.79	8927.51	10023.9	9876.14	10172.8	9233.58	8717.42	9838.46	9769.89	11472	10547.2	12289	10898.4	9642.45	10327.6	9494.44	9345.43	9567.69	10995.3	1	1.07105	0.98465	0.969197	0.992247	1.1403	0	0.506448	-0.109409	-0.219551	-0.0552629
P35900	KRT20	Keratin, type I cytoskeletal 20	133826	191737	365029	211797	402210	263359	408280	489094	436439	519823	408219	561408	421581	270409	393853	233232	257260	366425	361605	334049	244310	61861.9	337970	381350	461551	344778	522473	242181	631312	356234	260920	423399	411094	310514	297409	419396	1	1.62272	1.57556	1.19007	1.13985	1.60737	0	1.02526	0.947616	0.312946	0.230248
Q9NXH9	TRMT1	tRNA (guanine(26)-N(2))-dimethyltransferase	53928.7	54914.9	54161.2	51144.2	52044.4	53605.9	49326.5	56169.1	49708.9	58521.4	50367.9	51876.1	51846.9	48269.7	58359.4	53196.3	51213.8	49619.6	53204	55024.6	56165.2	56725.9	53224.2	53925.1	57149	54473.1	57299.6	54555.9	62129.1	58302.4	53238.7	53466.4	52144	52451.7	55437.9	57352	1	1.00428	0.979439	0.985217	1.04131	1.07726	0	0.0553552	-0.266121	-0.191331	0.534651
Q9NUJ1	ABHD10	Palmitoyl-protein thioesterase ABHD10, mitochondrial	338071	317412	342488	299176	300314	283066	268474	321179	289045	305225	299214	338623	314206	267400	304025	325425	343430	287669	315543	310720	331256	320770	302125	343054	313364	327697	350805	341575	393065	334882	319492	293398	304694	316557	322114	349605	1	0.918325	0.953681	0.990814	1.0082	1.09425	0	-0.866571	-0.491447	-0.0974633	0.0870509
Q9NVD7	PARVA	Alpha-parvin	14126	14738.7	15158	11327.5	14052.5	12761.2	12687.7	14187.1	13288	12568.5	14206.4	11875.5	14136.2	13781.5	13289.3	13382.9	12348	13356	12099	13810.9	14503.4	12330.6	12490.6	11196.5	12278.3	11967.5	12532.3	13414.7	9892.19	11343.9	13880.5	13098.5	13457.8	12999.4	12559.9	11830.1	1	0.943659	0.969543	0.936518	0.904856	0.852282	1	0.61859	0.793819	0.57025	0.355907
Q68DQ2	CRYBG3	Very large A-kinase anchor protein	1281.09	1605.2	1754.61	883.919	907.958	810.405	905.103	893.769	793.243	610.704	1230.85	854.384	805.087	498.941	692.89	958.547	1835.81	1522.79	1436.28	537.453	609.405	584.481	815.314	1373.09	365.342	643.352	1008.49	1179.79	732.95	475.217	1286.55	802.645	816.43	1258.18	749.527	807.96	1	0.623872	0.634587	0.977942	0.582585	0.628003	1	-0.011105	0.0176987	0.940704	-0.122092
Q96SK2	TMEM209	Transmembrane protein 209	1171.03	705.716	602.804	616.782	495.081	633.747	349.312	540.676	704.466	407.798	201.014	602.755	466.7	698.652	487.714	982.201	699.229	763.255	1263.04	196.431	345.145	589.481	721.341	597.833	265.049	330.094	166.72	557.349	748.43	189.318	718.282	527.2	491.367	780.831	503.77	398.382	1	0.733973	0.684087	1.08708	0.701354	0.554632	1	0.402681	0.290668	1.19553	0.329439
Q969R8	ITFG2	KICSTOR complex protein ITFG2	2638.63	6157.8	5746.46	4138.33	5436.03	6533.77	5244.53	7751.27	6893.99	6669.33	5716.84	6331.34	5865.28	5983.72	4796.13	7522.17	6877.51	4759.44	5660.99	5802.45	4657.54	6559.38	6706.57	5874.33	5673.59	6853.27	6099.73	7721.05	5431.96	6326.73	4823.45	6618.58	5738.66	6124.51	5894.28	6486.55	1	1.37217	1.18974	1.26974	1.222	1.34479	0	1.07939	0.550303	0.782313	0.643878
Q9Y2M5	KLHL20	Kelch-like protein 20	1512.34	2493.19	1635.39	1804	2371.89	2178.81	3067.56	2733.7	3122.79	2933.65	2783.34	2896.86	1195.22	2922.75	3668.27	3774.43	2060.85	2634.04	2226.99	3457.74	1951.97	1925.09	2276.06	3203.54	4069.18	2953.45	2732.32	1919.47	3212.92	2435.57	1963.36	2807.3	2693.29	2830.81	2685.17	2650.75	1	1.42985	1.37178	1.44182	1.36764	1.35011	0	1.22776	1.06189	1.26195	1.05007
Q15735	INPP5J	Phosphatidylinositol 4,5-bisphosphate 5-phosphatase A	5239	4502.42	4310.1	4487.17	3848.77	4133.89	4664.1	4173.67	4058.24	5471.06	5502.83	5217.05	5577.16	5742.61	4288.23	4656.55	5622.85	4368.62	2554.93	4081.88	4708.34	4663.55	4131.57	5065.73	3776.79	5378.64	5010.47	5778.14	5492.04	4737.41	4477.49	4500.19	5265.57	4256.97	4469.19	5279.34	1	1.00507	1.17601	0.950748	0.998147	1.17908	0	0.0283103	0.982831	-0.275023	-0.0103482
Q93034	CUL5	Cullin-5	163575	152673	151519	147025	144420	145771	133871	159279	139887	150913	143520	153825	151021	144155	157398	157100	151821	135560	147691	148449	148935	154043	143525	166276	150534	159351	166081	153710	184807	161708	151843	145944	149984	148124	152663	165132	1	0.961154	0.987758	0.975511	1.0054	1.08752	0	-0.443868	-0.139882	-0.279822	0.0617124
Q9HA64	FN3KRP	Ketosamine-3-kinase	61102.4	52329.9	56399.6	60781.1	53829.7	53749.3	49538.5	57973.3	53792.4	54668.4	45993.6	51827.9	47617.1	46914.8	51218.8	48932.8	48794.2	45368.1	53097.8	50914.1	48985.1	54965.2	52161.5	53488.8	53292.7	52494.6	54426.5	51709.6	53447	48190.9	56888.6	53944.4	48714.4	49421.4	52578.7	52053.7	1	0.948246	0.856313	0.868741	0.924239	0.915012	1	0.391049	-0.690665	-0.544443	0.108576
O95503	CBX6	Chromobox protein homolog 6	9953.63	10379.6	9632.65	7911.03	6913.24	9730.7	8337.96	10660.7	9873.07	10227	9206.21	11129.2	9339.33	11302.9	9320.18	11280.8	8927.22	8345.11	8999.5	10291.6	9648.58	10365.9	9607.64	9301.91	9903.48	10323.5	10573.6	9690.12	12353.2	10638.7	8958.04	9765.88	10059.5	9568.85	9765.5	10715.8	1	1.09018	1.12296	1.06819	1.09014	1.19622	0	0.459582	0.626649	0.347488	0.459364
Q9NWB6	ARGLU1	Arginine and glutamate-rich protein 1	39073.1	41023.2	41588.6	43992.5	50851.2	46411.9	62218	44352.9	66905.6	48748.4	41038.8	44138.7	44168.6	67613.6	52467.9	44076.8	39061.7	45171.7	65815	50176	69022.4	46900.3	43043.1	50150.7	46057.6	48776.7	47803.7	47279.4	47595.2	73557.5	43305.7	53727.4	49885.5	48860.2	51034.8	53002.5	1	1.24065	1.15194	1.12826	1.17848	1.22391	0	1.07475	0.678558	0.572822	0.797079
Q5CZC0	FSIP2	Fibrous sheath-interacting protein 2	2088.99	3368.96	638.691	3883.63	3579.43	2430.15	452.795	1599.39	2075.03	2296.67	4399.29	3085.1	5392.85	6368.63	525.309	1422.23	3237.63	1345.09	3321.19	3009.77	2599	2536.05	5700.27	796.356	2191.24	5088.67	6448.29	5848.57	2977.01	3667.2	2711.94	1770.81	3954.24	2467.18	2764.58	4805.95	1	0.652967	1.45808	0.909748	1.01941	1.77214	0	-0.449441	0.593262	-0.116885	0.02514
Q9H496	TOR1AIP2	Torsin-1A-interacting protein 2, isoform IFRG15	4056.2	4313.71	4074.02	3897.87	4425.37	5649.94	4832.46	5223.67	5885.19	3787.7	5186.11	4229.93	4807.62	5030.12	4941.2	4788.27	5084.73	4269.04	3953.1	4370.75	4150	5078.64	5315.63	4397.29	5029.22	4743.43	4625.82	5038.87	4414.61	5190.56	4153.43	5075.79	4839	4493.18	4794.16	4802.66	1	1.22207	1.16506	1.0818	1.15426	1.15631	0	1.4207	1.05597	0.523308	0.986903
Q8IX04	UEVLD	Ubiquitin-conjugating enzyme E2 variant 3	39692	48792.5	42858.1	38522.4	36940	34867.2	37305.6	38662.8	38937	34323.6	32993.4	38982.7	39121.1	39468.5	32476.5	49721.1	40785.6	45917	36772.8	36876	43201.9	44149.3	45126.6	41803.9	38610.6	24163.8	37450	38252.8	36992.2	34966.5	41361	36819.2	36608.5	42014.5	42578.5	34365.1	1	0.890192	0.885095	1.0158	1.02943	0.830856	1	0.350798	0.320668	1.09341	1.17402
P05109	S100A8	Protein S100-A8	1635.48	1359.01	1678.74	2238.13	2062.91	1295.51	6499.23	1768.63	1840.25	2707.91	2005.18	1430.53	4874.11	6373.03	1655.76	3434.1	2061.29	3995.82	1374.16	1127.22	1725.36	1239.96	2688.02	1946.94	1085.8	5824.25	2359.44	1842.55	3179.37	2069.36	1794.85	2822.31	3267.72	2398.52	1737.21	3055	1	1.57244	1.82061	1.33633	0.967886	1.70209	0	0.815347	1.16881	0.479044	-0.0457412
Q969F9	HPS3	BLOC-2 complex member HPS3	267.04	474.945	771.789	261.591	542.041	954.263	834.387	703.087	1026.44	828.334	386.451	769.637	662.554	614.444	881.218	668.635	543.249	550.064	530.461	586.925	649.846	746.577	452.302	412.2	510.203	717.14	728.147	672.66	986.614	590.191	463.481	869.303	662.861	575.867	554.226	738.95	1	1.8756	1.43018	1.24248	1.19579	1.59435	0	1.4732	0.723782	0.407979	0.329418
P86790;P86791	CCZ1B;CCZ1	Vacuolar fusion protein CCZ1 homolog B;Vacuolar fusion protein CCZ1 homolog	24175	31139.1	29582	25680.1	37988.4	36647.6	30056.2	34819.2	36223.6	37676	37387.2	35480.5	36835.2	35192.5	35173.9	32599.5	37294.9	40969.4	33790.1	39105.8	31236.8	33154.5	25586.2	32794.5	37899.2	34596.3	32035.7	34006.2	34651.8	39199.9	29712.9	35084.5	36013.9	36751.9	32134.3	34898	1	1.18078	1.21206	1.2369	1.08149	1.17451	0	1.03597	1.21521	1.35756	0.46698
O43760	SYNGR2	Synaptogyrin-2	19571.9	19755.8	18685.8	17013.4	25428.7	23488.6	23403.6	21546.5	24100.8	24822.4	20816.9	21547.8	17967.3	21508.8	20004.8	18598.6	22712.2	22410.7	20841.7	23931.7	21781.9	22597.1	18571.8	21018.6	22056.3	24553.5	21533.3	23846.6	21023.1	27005.4	20091.1	23472.4	20369.1	21699	21205.1	23592.4	1	1.1683	1.01384	1.08003	1.05545	1.17427	0	0.965733	0.0793996	0.459224	0.318173
Q7Z460	CLASP1	CLIP-associating protein 1	29213.7	28622.6	27173.7	22677.8	28500.2	27404.3	25684.3	34066.4	25391.4	32445.6	29412.6	30002.6	28574.1	25376.2	30740.3	28747.4	27842.5	20926	28585.4	27576.5	28707.8	25534.5	25523.5	33634.3	26849.8	30281.8	31761.6	31187.1	36739.2	26974.9	27237.6	28998.4	28821.1	26735.6	28050	31388.9	1	1.06465	1.05814	0.981567	1.02983	1.15241	0	0.42415	0.381452	-0.120941	0.195688
P04637	TP53	Cellular tumor antigen p53	16023.6	17930.8	16759.9	20958.4	23572.2	23938.6	23552.2	21833.1	24420.1	24236.9	21528.4	22523.3	22988.1	26351.5	22540.1	19685.3	22946.9	28649.6	24085.2	28227.2	18404.5	23882.5	22295.2	23319.4	25283.9	23657.5	19979.5	22173.5	20825.9	26450.6	19049	23596.2	23186.3	24718.8	22637.1	22617.4	1	1.23871	1.21719	1.29765	1.18836	1.18733	0	1.27428	1.15942	1.58889	1.00552
Q2TAL8	QRICH1	Transcriptional regulator QRICH1	41102.8	41583.1	39729.9	35903.1	39775.7	44838.9	36397.3	45966.9	38839.3	42324.1	39880.2	41872.5	40315.6	36412.5	37692.2	40346.3	39472.1	42197.5	34898.5	36430.6	39282.5	36678.7	37390.2	40462	40940.9	41542.1	42432.8	41134.3	47648.5	43742.5	39618.9	41673.3	39234.6	38669	38950.8	43300	1	1.05185	0.9903	0.976024	0.983137	1.09291	0	0.558082	-0.104401	-0.258049	-0.181486
Q7Z4V5	HDGFL2	Hepatoma-derived growth factor-related protein 2	174394	165523	171418	155333	143172	204453	184572	202072	182056	206237	158902	166193	164604	181668	216925	156732	153820	144360	145602	185423	182894	174993	166048	201951	200942	171410	195016	171164	193212	165518	161968	195878	177658	157187	185366	179264	1	1.20936	1.09687	0.970483	1.14446	1.10678	0	1.96058	0.907176	-0.27642	1.35279
P62891;Q59GN2	RPL39;RPL39P5	Large ribosomal subunit protein eL39;Putative ribosomal protein eL39-like 5	36762.4	38166.7	33118.1	42132.3	36877.6	34034.1	34964.9	31603.4	32851.1	36849.7	40513.4	38575	39691.7	38131.7	38070.9	39517.8	40159.1	40116.9	32138.8	36424.9	38564.7	41261.5	38139.5	36136.1	37864	38368.8	38365.4	44906.6	42792.8	45014.5	37411.4	34060.6	38996.5	37671.5	38393.2	41889.6	1	0.910434	1.04237	1.00695	1.02624	1.1197	0	-0.748246	0.353957	0.0580744	0.219227
P04049	RAF1	RAF proto-oncogene serine/threonine-protein kinase	12423.6	10362.8	12036.5	11128.6	18875.7	16516.8	15059.7	15997.1	16151.1	18599	18534.5	16081.6	17421.4	16621.9	15852	17351.2	16456.9	19667.9	14806.2	15484.5	15023.1	17405.8	19211.1	15614.3	15468	18752.6	15059.5	13058.8	16068.5	18918.5	12965.4	16464.8	16902.3	16753.3	16544.5	16371.6	1	1.2699	1.30364	1.29215	1.27604	1.26271	0	1.02736	1.15581	1.11207	1.05076
O00560	SDCBP	Syntenin-1	10294.5	10961.4	11121.7	9438.09	11672.4	10465.7	11772.7	14461.6	11526.5	12292.5	10877.4	12031.7	11091.6	11931.2	12833.3	12671.2	11340.9	12329.8	11768.5	12408.8	11813	10406.6	12220.8	12659.2	12602.6	12089.2	11491.3	11579.7	12682.2	12020	10697.6	12103.8	11753.1	12103.8	11940.4	11972.5	1	1.13145	1.09866	1.13145	1.11618	1.11917	0	1.10301	0.827879	1.10301	0.974856
P17931	LGALS3	Galectin-3	419407	391696	403106	361664	364115	337061	309891	422522	328420	380140	373573	391292	378712	360922	373930	387658	422313	354887	373277	401384	428387	411121	404241	409116	376572	396866	423030	402990	484088	423478	387997	355607	375686	387904	405887	426091	1	0.916519	0.968269	0.999759	1.04611	1.09818	0	-0.850298	-0.3232	-0.00245664	0.469636
P78318	IGBP1	Immunoglobulin-binding protein 1	53547.5	54096.7	56737.1	45504.7	49903.1	55174.1	50233.2	55947.9	55569.7	54150.9	51266.1	53413.3	50259.4	46248.1	51540.2	55838.6	59286.6	50177	52125	55593.6	54929.9	57498	53938.2	60115.9	51589.8	55525.1	57197.7	53718.3	66048.9	57323	51957.8	54215.2	50545.4	54604.2	55614.4	57962.6	1	1.04345	0.972816	1.05093	1.07037	1.11557	0	0.375923	-0.235215	0.440703	0.608936
Q9H633	RPP21	Ribonuclease P protein subunit p21	4493.29	6332.01	5169.12	4262.62	7351.49	5907.95	6444.66	7255.57	6144.31	6973.7	6375.39	5771.1	7163.26	5324.3	4997.74	5825.58	6396.26	6050.42	6914.91	8371.81	4806.02	7366.12	5611.23	8612.06	6019.5	6791.01	7191.08	6325.5	7266.58	6393.97	5521.71	6545.24	5926.36	6711.79	6482.99	6793.63	1	1.18536	1.07328	1.21553	1.17409	1.23035	0	0.804712	0.318143	0.935662	0.75577
Q9BW83	IFT27	Intraflagellar transport protein 27 homolog	38094.1	39442.8	40199.7	39400.1	42869.3	43246.7	40361.7	42207.9	41660.6	44293.3	41951.3	43287.8	43124.9	44788.3	38191.8	42120.9	44031.5	48114.3	43566.8	44915.1	44282.9	43420.8	41523.7	40467.6	41684.5	44185.1	39894.3	43119.4	43335.1	45874.2	40001.2	42354	42268.8	44549.7	42275.9	43281.6	1	1.05882	1.05669	1.11371	1.05687	1.08201	0	0.717242	0.691264	1.38657	0.69342
P51608	MECP2	Methyl-CpG-binding protein 2	27564.3	27720.6	26330.3	22550.4	23370.4	30423.3	28945.8	33507.6	27074.2	32390.9	25836.4	29698.1	27254.2	29508	34208.7	25470.7	27302.9	24182.2	25623.3	29420.4	27898.3	28436.2	28476	33312.5	31262.5	28646	29503.6	25370.1	30081.8	29346.1	25507.2	30468.4	29301.1	26399.9	29877.1	28589.5	1	1.1945	1.14874	1.035	1.17132	1.12084	0	1.60956	1.23086	0.289616	1.41775
O43719	HTATSF1	17S U2 SnRNP complex component HTATSF1	130392	119936	132572	118470	127953	125259	118012	138850	119376	146776	123713	113320	125475	106896	123972	130729	128912	119695	128716	141219	130864	138583	125813	138550	128143	129432	133827	135918	144897	131011	125865	129655	118675	129854	132391	135017	1	1.03011	0.942879	1.0317	1.05185	1.07272	0	0.414136	-0.785538	0.435903	0.713056
Q15007	WTAP	Pre-mRNA-splicing regulator WTAP	29383.2	25785.6	26141.9	25504.2	25727.2	23592.2	23991.1	24457.9	21653.2	23979.3	21173.6	22913.4	23048.2	26361.2	23487.7	22988.1	25887.1	26417	27130.9	28011.1	27028.3	26358.3	25595.1	24850.4	21916.1	23452.1	24032.8	26530.9	23956.7	22626.5	26508.4	23534.8	23396.8	26086.8	25149.6	24119.8	1	0.887821	0.882619	0.984095	0.948741	0.909892	1	-0.244931	-0.30267	0.823489	0.431144
Q14558	PRPSAP1	Phosphoribosyl pyrophosphate synthase-associated protein 1	19501.2	19209.4	20741.5	18459.5	20310.1	19850.3	20831	20907.5	20716.7	20932.2	20319	19404.4	20599.5	20664.7	21054.1	19936.4	20846.8	22434.3	19654	20292	19790.4	21366.6	19405.7	19219	19192.8	18253.8	18487.1	18200.3	18128.5	17209.5	19644.3	20647.5	20408.3	20632.7	19794.9	18055.8	1	1.05107	1.03889	1.05031	1.00766	0.919136	1	1.63153	1.48095	1.62219	1.09476
Q92562	FIG4	Polyphosphoinositide phosphatase	3105.84	1438.33	3693.37	5071.28	4424.43	738.362	4866.42	3612.03	3304.93	4050.03	2721.21	1272.82	2620.01	4915.48	3055.34	942.63	2477.55	3836.73	4109.64	4181.3	1338.71	2779.43	3519.61	755.553	4382.82	992.769	520.782	3144.15	540.967	4163.25	3546.65	3314.35	2916.97	3109.57	2555.22	1872.38	1	0.934502	0.822458	0.876762	0.720461	0.52793	1	0.861254	0.623907	0.738941	0.407844
O75884	RBBP9	Serine hydrolase RBBP9	99011	87184.3	90272.5	83473	80030.2	73401	70834	83382.8	75433.4	76379.1	79773	80913.1	81165.8	69138.7	78420.4	78605.3	82396.8	77949.1	81203.1	80012.2	86830.6	84271.5	80091.2	85061	78124	83094.1	81660.3	80914.6	72060.7	81871.9	87994.2	75886	77882.2	80033.3	82875.7	79920.3	1	0.862398	0.885083	0.909529	0.941831	0.908245	1	-0.499667	-0.252429	0.0139943	0.366041
Q13029	PRDM2	PR domain zinc finger protein 2	786.001	4685.77	845.777	5511.1	3744.95	4653.69	4343.08	4652.82	5639.38	3101.83	473.996	3785.22	4086.15	4003.49	3758.43	839.773	3683.81	3726.41	3034.2	453.061	345.603	9774.62	837.494	4985.05	3983.18	3831.52	6091.77	5211.74	6263.44	5100.37	3114.72	4478.16	3221.45	2347.45	3985.19	5299.77	1	1.43774	1.03427	0.753664	1.27947	1.70152	0	0.623987	0.0488476	-0.351145	0.398375
Q9H2P9	DPH5	Diphthine methyl ester synthase	14752.1	16108.3	20913	14866.3	13794.4	15110.2	14704.3	16340.7	15921.8	13975.6	15974.5	17692.4	15700.9	15513.2	13480.4	20250.7	18538.1	14833.8	17043.4	12190.4	17843.8	18320.9	17778.1	18002.5	14941.3	15966.6	21559.3	20737.1	18327.8	19286.5	16086.8	15210.5	15672.3	16571.3	17377.3	19175.5	1	0.945528	0.974233	1.03011	1.08022	1.192	0	-0.283712	-0.134204	0.15685	0.417829
Q9Y6Q9	NCOA3	Nuclear receptor coactivator 3	43526.3	45648.3	43773.9	39093.2	39099.3	43614.4	42871.9	48732.5	45681.3	46582.5	39888.8	45751.3	42422.6	49850.2	49060.4	43009.3	43568.4	40138.2	41180.1	42824.4	45954.9	44272.6	47439.5	50599.6	47454.9	44051.1	45383.9	43997.9	50556.9	47825.5	42228.2	45496.5	45394.7	42144.1	47144.3	46363.1	1	1.0774	1.07499	0.998008	1.11642	1.09792	0	0.790427	0.765801	-0.0203411	1.18894
P47897	QARS1	Glutamine--tRNA ligase	69411	68184.6	58195.8	70644.4	80833.6	78868	77417.2	73869.3	83013.5	81970.2	79424.3	76773.8	71695	78529.7	72441.8	79172.6	80875.1	94365	79780.1	81280.3	72887.5	78857.7	77962.4	65226.3	83282.3	78776.4	69126.9	79588.7	78231.7	91256	69453.9	79027.7	75772.9	83094.6	75643.2	79395.9	1	1.13784	1.09098	1.1964	1.08911	1.14315	0	0.962961	0.63559	1.37203	0.622545
Q6DD87	ZNF787	Zinc finger protein 787	6772.17	6776.16	6678.66	7243.08	5090.4	7697.89	7789.35	7726.97	7867.72	7926.69	6186.42	7540.31	6929.95	7522.94	8620.21	7317.51	6831.1	6825.89	6694.81	6369.64	6913.6	7848.84	6972.3	8071.45	8507.04	7225.38	7187.06	7107.95	9122.41	8170.05	6512.09	7801.72	7359.96	6807.79	7662.65	7762.57	1	1.19804	1.1302	1.04541	1.17668	1.19202	0	1.03131	0.678037	0.236466	0.920092
Q96IU4	ABHD14B	Putative protein-lysine deacylase ABHD14B	82367.7	82815.8	77466.8	90992.6	85284.5	100801	94743.7	99567.4	95075.1	97715.4	87428.4	87376.9	87669.6	92468.6	103388	84312.8	83695.5	84199.7	82361.5	91590.1	90183	89223	88289.4	102226	89047.8	85007.5	93325.2	87911.7	96896.7	90121.5	83785.5	97580.6	91666.4	85231.9	91793.9	90652.5	1	1.16465	1.09406	1.01726	1.09558	1.08196	0	2.00889	1.14764	0.210636	1.1662
O60814;P57053;P58876;P62807;Q5QNW6;Q93079;Q99877;Q99879;Q99880	H2BC12;H2BC12L;H2BC5;H2BC4;H2BC18;H2BC9;H2BC15;H2BC14;H2BC13	Histone H2B type 1-K;Histone H2B type F-S;Histone H2B type 1-D;Histone H2B type 1-C/E/F/G/I;Histone H2B type 2-F;Histone H2B type 1-H;Histone H2B type 1-N;Histone H2B type 1-M;Histone H2B type 1-L	351289	347531	334615	364383	430906	403990	422461	397561	442193	434530	419489	396557	399433	456918	369216	411266	416824	489215	407617	468922	391665	408641	407177	405268	449822	428280	371568	399646	387616	472273	365745	420147	408323	438769	412515	411877	1	1.14874	1.11641	1.19966	1.12788	1.12613	0	1.17928	0.92296	1.58294	1.01383
Q15427	SF3B4	Splicing factor 3B subunit 4	99460.7	105679	96163.2	89367.3	93818.2	99460.2	94340.2	89164	93564.4	100568	100453	100253	103941	106330	99655.1	103456	92139.9	96896.5	92856.9	91038.6	118179	90083.1	87798.4	100341	97902	104240	113380	94813.8	118363	104640	96897.8	95419.4	102127	95277.6	98860.7	107088	1	0.984743	1.05396	0.983279	1.02026	1.10516	0	-0.145085	0.513143	-0.159001	0.192637
Q9Y605	MRFAP1	MORF4 family-associated protein 1	13549.9	8876.38	7539.24	12619.2	6060.9	8718.8	5985.53	7695.86	7042.91	7903.14	7635.31	6262.87	6262.24	7642.61	7222.14	6713.55	7290.32	6409.26	5955.76	6730.26	6715.46	6438.02	7425.9	7365.3	5982.75	5835.47	7709.19	7831.41	6377.54	6319.25	9729.12	7469.25	7005.03	6619.83	6785.49	6814.57	1	0.767721	0.720007	0.680414	0.697441	0.70043	1	0.224624	0.065349	-0.0668161	-0.00997848
Q8WWM7	ATXN2L	Ataxin-2-like protein	238017	217688	230140	228694	201613	229253	209773	242396	224637	244764	208670	229478	217866	204283	223655	221449	233191	201768	212299	216988	233361	217979	211561	235901	230678	230351	243546	230089	276784	242844	223230	230165	216790	217139	225896	244723	1	1.03106	0.97115	0.972712	1.01194	1.09628	0	0.322637	-0.299646	-0.283426	0.124035
P31947	SFN	14-3-3 protein sigma	230124	206762	201870	193610	181215	216318	196343	227363	195934	227908	196511	205207	197349	186982	224657	207409	199595	191131	189429	205750	212882	209587	195587	218595	213223	212566	226409	214977	256962	215180	202716	212773	202141	198663	209975	225219	1	1.04961	0.997164	0.980005	1.03581	1.11101	0	0.446926	-0.0255457	-0.180125	0.322563
Q96AE4	FUBP1	Far upstream element-binding protein 1	1756690	1.17921e+06	1.68933e+06	1.57618e+06	1.0782e+06	1.60462e+06	1.08978e+06	1.70291e+06	1.56588e+06	1.66916e+06	1.49904e+06	1.63674e+06	1.50957e+06	1.51705e+06	1.7109e+06	1.56066e+06	1.19372e+06	1.42883e+06	1.55264e+06	1.67408e+06	1268625	1.66511e+06	1.54772e+06	1.75124e+06	1.53533e+06	1.64936e+06	1.72821e+06	1.64131e+06	1.99786e+06	1715683	1.45592e+06	1526469	1.57466e+06	1.48198e+06	1.5536e+06	1.74648e+06	1	1.04845	1.08155	1.0179	1.06709	1.19957	0	0.242791	0.408647	0.0896881	0.336177
Q01844	EWSR1	RNA-binding protein EWS	541460	474675	500553	463168	458507	496098	454466	525438	455098	507763	457311	490506	468907	472841	526838	497320	482467	451337	465448	518187	522116	502683	485129	559332	488241	515613	539071	499155	584697	515409	487673	487773	483281	482952	511500	530789	1	1.0002	0.990994	0.99032	1.04886	1.08841	0	0.00231483	-0.101867	-0.109493	0.552631
Q9Y2U9	KLHDC2	Kelch domain-containing protein 2	3259.19	3354.66	2695.12	3347.39	4682.77	4010.57	4734.38	4381.2	3363.45	4935.78	3998.12	4194.58	3251.66	4237.06	2591.29	4054.32	4041.98	5461.32	3554.99	4332.64	4250.85	4553.02	4603.65	3569.53	4760.13	4368.92	3914.28	4414.27	3875.14	4892.81	3467.83	4285.07	3654.54	4289.05	4347.44	4293.08	1	1.23567	1.05384	1.23681	1.25365	1.23798	0	0.990294	0.226247	0.99511	1.06586
Q7L945	ZNF627	Zinc finger protein 627	6174.3	5691.61	4140.95	5515.02	6157.54	6095.75	5755.72	6200.96	6448.85	6793.99	7062.18	6105.9	6691.02	5014.17	5683.26	5902.08	6908.03	6776.03	5356.63	5584.61	4106.78	5077	6277.47	4972.96	4710.87	6743.88	6591.86	6641.89	6650.8	6113.27	5535.88	6259.06	6111.31	6105.48	5029.01	6548.34	1	1.13063	1.10394	1.10289	0.908439	1.18289	0	0.714276	0.568343	0.562586	-0.500634
Q13485	SMAD4	Mothers against decapentaplegic homolog 4	57410.5	59102.2	59645.3	52357.6	52465.1	61073.8	53426.8	64126.1	53552.7	62885.6	52972.8	55557.1	56565.3	53770.1	56778	55274.5	57892	50947.7	52997.2	58962.8	55135.8	54799.9	53916.1	63139.8	60898.3	58519.2	67320.4	58721	69845.9	57775.4	56196.1	59013	55128.7	55214.8	57578	62436.4	1	1.05013	0.981005	0.982538	1.02459	1.11104	0	0.451401	-0.171061	-0.157253	0.221438
Q5EBL8	PDZD11	PDZ domain-containing protein 11	27662.3	25839.7	24630	26031.8	24347.2	25025.7	25994.4	26449.4	25413.6	24174.8	27658.2	24184.3	25848.5	25769.5	27946.2	28377.9	28577.1	22965.6	23593.9	22189.5	22404.9	24719.8	25159.6	28120	23138.1	27716.6	29636.3	27704.1	29129.7	25959.6	25702.2	25411.6	26281.4	25140.8	24708.5	28029.3	1	0.988692	1.02253	0.978158	0.961337	1.09054	0	-0.124897	0.248879	-0.241248	-0.427031
Q96CF2	CHMP4C	Charged multivesicular body protein 4c	99508.5	94799.5	97594.2	89134.8	85220.4	101433	90155.3	107592	96118.2	105527	87399.1	97277	94219.9	94598.5	106850	96827.4	98128.2	82138.6	88573.5	102249	97103.8	95859.6	93725.5	111823	95205.6	97129.9	102605	95255.1	114284	101586	93251.5	100165	96069	93583.3	98743.6	102172	1	1.07414	1.03021	1.00356	1.0589	1.09566	0	0.775023	0.315845	0.0371952	0.615665
Q9Y224	RTRAF	RNA transcription, translation and transport factor protein	103202	99023.8	98694.8	100178	101984	90649.3	96825.9	98341	99906	98231.8	101648	104575	98188.1	97712.1	101764	104106	104677	101719	103574	104151	97326.3	103717	102144	93196.8	99018.3	104515	102840	105712	106729	110103	100616	96790.8	100777	103645	99080.4	105980	1	0.961978	1.0016	1.0301	0.984733	1.0533	0	-0.713297	0.0300224	0.564742	-0.286404
Q8WVL7	ANKRD49	Ankyrin repeat domain-containing protein 49	3395.94	4132.35	4422.66	2593.9	4204.07	4598.84	3342.32	5566.81	5321.36	5503.92	4525.73	4275.35	3198.68	4137.1	3765.78	2913.94	4868.45	3792.92	3402.14	3144.86	5675.49	3363.83	3222.59	4500.56	3010.67	4579.29	4305.85	4019.48	5467.01	5437.32	3749.78	4866.65	3980.53	3624.46	3954.63	4761.79	1	1.29785	1.06153	0.966579	1.05463	1.26988	0	1.10362	0.228005	-0.123835	0.202413
O00231	PSMD11	26S proteasome non-ATPase regulatory subunit 11	309972	308781	291376	298956	318273	307477	355374	315457	348951	304020	299283	295931	323315	320965	281902	295420	310867	344546	292965	319937	284157	275420	305660	340445	263262	284116	289490	261236	283720	308570	305472	326256	304279	312747	293789	285426	1	1.06804	0.996096	1.02382	0.961754	0.934378	1	2.03685	0.940512	1.36295	0.417179
Q9Y6X3	MAU2	MAU2 chromatid cohesion factor homolog	35436.5	32071.2	33350.2	39304.7	30882.1	36011.8	54451	38286.3	25411.8	8597.92	39783.7	34564.8	35200.9	46509.7	49832.4	36098.8	16429.5	11602.7	21952.3	37504	30015.9	26991.6	37670.5	33530.2	42620.6	21237.8	35005.4	31254.7	29988.3	26077.8	34208.9	32551.8	41178.3	24717.5	34165.8	28712.8	1	0.951557	1.20373	0.722544	0.998738	0.839336	1	0.698482	2.26805	-0.726939	0.992144
P16885	PLCG2	1-phosphatidylinositol 4,5-bisphosphate phosphodiesterase gamma-2	4614.06	8245.14	4181.8	7119.04	8570.42	7925.87	6362.9	7379.67	10554.2	8904.57	9490.53	9906.61	8467.33	8452.13	7828.81	8343.09	8954.03	9177.78	3787.02	2484.85	6013.26	4832.12	8894.63	5018.26	6501.51	8731.43	8522.21	8767.94	7291.08	9232.13	6546.09	8225.44	8829.08	6549.35	6251.96	8508.96	1	1.25654	1.34876	1.0005	0.955067	1.29985	0	0.855562	1.16309	0.00166176	-0.149849
O15541	RNF113A	E3 ubiquitin-protein ligase RNF113A	27578.3	29130.9	25663.9	28513.6	27457.7	31120	29516	28967.7	28544.8	31629.8	25612.4	26756.7	28688.7	24278.3	32007.7	24957.9	25479	23016.1	26758.8	27999.7	30865.7	27395.2	28602.5	36723.2	26175.7	29273.3	32875.7	29207.9	32825.8	28049	27668.9	29955.7	27468.8	25642.3	29952.5	30446.3	1	1.08265	0.992768	0.926757	1.08253	1.10038	0	0.82335	-0.0720454	-0.729638	0.822193
O43913	ORC5	Origin recognition complex subunit 5	3392.86	3468.65	3180.38	2378.28	4258.86	2373.32	3603.29	3108.95	3423.02	4480.27	3494	1609.43	4033.76	3708.08	3504.5	4293.51	1934.97	5942.04	3398.61	3035.51	2977.51	3312.83	2812.19	2329.35	2185.77	2298.53	2993.1	2475.26	1869.08	2943.65	3335.81	3397.77	3269.95	3720.93	2723.53	2515.92	1	1.01858	0.980259	1.11545	0.816453	0.754217	1	1.07558	0.919679	1.46973	0.253214
P08397	HMBS	Porphobilinogen deaminase	120248	114930	114867	102518	104626	105746	96183.4	114605	102928	115044	102234	111268	112686	100547	109621	114283	104450	101093	108877	102706	113713	108681	108627	112828	105955	113202	124393	116642	135880	120557	111438	106901	107271	106282	109961	122135	1	0.959292	0.962611	0.953732	0.986747	1.09599	0	-0.42408	-0.389506	-0.482004	-0.138066
O43583	DENR	Density-regulated protein	237560	221181	239831	156849	204619	219534	208024	223617	149895	231872	153866	233328	220276	144365	233643	222466	217012	153826	218577	224761	257927	238271	223123	246034	225514	240864	246027	238087	280052	229181	212008	206588	197095	207328	238174	246842	1	0.974437	0.929661	0.977928	1.12342	1.16431	0	-0.155581	-0.428099	-0.134336	0.751157
O15234	CASC3	Protein CASC3	12783.6	10742.9	13077.5	9266.32	10838.7	10565.9	9674.72	14270.5	7472.19	10122.7	12371.2	15617	12835.7	14580.6	13571.5	14529.3	13089.1	14151.1	13004.7	15237.3	15139.9	12157.9	8801.41	17656.6	12031	15599.6	11262.4	13045.4	13462.2	13805.7	11341.8	10421.2	13795.2	14002.3	13157.4	13435	1	0.918833	1.21632	1.23457	1.16008	1.18456	0	-0.439782	1.17206	1.27098	0.867348
Q14978	NOLC1	Nucleolar and coiled-body phosphoprotein 1	34017.5	30895	34456.7	33214.8	29255	43344.4	34758.9	36900.5	32135.8	34697.5	33255.9	34351.2	31690.4	33234.6	41380.1	36740.9	34574.2	31475	29077.9	33470.3	34230.3	35006.5	36094.3	43937.1	37714.5	36040.9	38908.5	33416.8	41334.8	32480.9	32367.8	36367.4	34782.4	33067.7	37396.5	36436.4	1	1.12357	1.0746	1.02162	1.15536	1.1257	0	0.983046	0.593484	0.172018	1.23599
Q9NWS0	PIH1D1	PIH1 domain-containing protein 1	131086	204449	104910	138906	180688	156688	165592	162723	152472	169788	178790	200220	177784	140786	133366	177477	190316	187295	134736	85555.3	161976	165373	166267	156792	160812	181834	192576	188264	202196	166622	152008	161453	166189	155076	162244	186298	1	1.06213	1.09329	1.02018	1.06734	1.22558	0	0.275434	0.413562	0.0894725	0.298507
Q7Z698	SPRED2	Sprouty-related, EVH1 domain-containing protein 2	1446.49	4230.98	2807.09	1242.93	2746.13	3293.51	3824.72	2788.84	3495.86	4161.19	4469.84	3991.42	2186.28	4076.65	4020.82	5207.91	3704.75	626.135	2361.3	581.883	3341.36	1590.09	3661.66	1030.95	3773.79	3197.27	4375.29	3574.97	4217.49	2874.99	2494.72	3512.82	3749	2496.4	2679.57	3648	1	1.4081	1.50277	1.00067	1.07409	1.46229	0	0.882786	1.08758	0.00144994	0.160278
Q6NUN9	ZNF746	Zinc finger protein 746	1545.31	743.324	947.891	164.553	1065.69	1178.78	1262.13	1709.35	1199.85	1686.45	881.448	1197.79	938.607	1059.41	1568.81	1429.12	1233.1	899.243	1109.09	1653.58	1166.57	1584.69	1032.6	1331.2	1793.58	1420.96	1792.22	1353.94	1864.76	1328.13	893.354	1407.31	1129.21	1264.83	1381.73	1552	1	1.57531	1.26402	1.41582	1.54668	1.73727	0	0.780324	0.358098	0.563997	0.741481
Q96SB4	SRPK1	SRSF protein kinase 1	8572.12	8669.6	7860.88	11277.5	10992.6	10110.8	10926.3	8308.93	11830.4	11270.3	12681	10214	10797.9	11619.4	11879.4	10824	10871.9	13711.1	10630.6	11883.6	9195.18	9664.92	10476.9	10139.3	11523.4	11878.4	10804.4	10984.7	9695.49	13885.7	9474.55	10489.4	11438.3	11584.3	10199.9	11449.7	1	1.10711	1.20727	1.22267	1.07656	1.20847	0	0.513778	0.994227	1.0681	0.367254
Q9BWU1	CDK19	Cyclin-dependent kinase 19	14361.1	12476.9	12135.6	12348.6	13643	13114.9	12622.9	12487.5	13347.8	12321	12200.7	13502.1	13737.7	12390	11272.1	12031.2	13094.5	12615	12092.4	12476.8	13828.7	12429	11493.6	13280.7	11082.3	13909.4	14020.6	13923.6	15227.4	14993.4	12993	12778.8	12620.5	12462	12422.8	14414.9	1	0.983515	0.971331	0.95913	0.956117	1.10943	0	-0.150637	-0.261982	-0.37347	-0.40101
Q71RC2	LARP4	La-related protein 4	49933	43807.4	37554.1	37372.7	45499.2	48521.9	41954	53373.9	44822.2	44771.7	48894.8	50142.2	40243.6	46056.4	57135.3	47173.6	46478.5	40024.3	50830	43146.7	45130.5	47142.4	47779.5	53124.6	44617.8	47610.9	55391.9	45236.1	51434	45084.6	42833.3	46688.7	48494.5	45530.6	47559	48951.5	1	1.09001	1.13217	1.06297	1.11033	1.14284	0	0.630159	0.925299	0.440868	0.772396
Q9BYX4	IFIH1	Interferon-induced helicase C domain-containing protein 1	1186.08	1020.72	1359.47	1277.21	1031.63	1318.08	1271.12	1861.39	1505.75	1521.16	1914.56	1864.41	773.594	2272.87	2118.88	1337.47	2502.1	1540.24	2185.84	1760.55	2904.76	1805.5	1488.31	1988.64	1571.02	1247.65	1614.46	1754.68	2080.73	1286.37	1175.02	1495.5	1788.86	1865.24	1951.65	1596.78	1	1.27274	1.52241	1.58741	1.66094	1.35893	0	0.759867	1.45545	1.63654	1.84141
P15927	RPA2	Replication protein A 32 kDa subunit	80910.3	85870.7	89247.3	80319.5	84832.5	85529.3	77808.3	96341.9	87574.8	87758.2	80827	90624.7	88123.7	80945.7	92627.9	81787.7	88400.6	77849.1	82592.5	81783.4	83209	79624.3	85505.4	81754.4	84520	86337.2	93104.8	88591.2	96193.2	87200.4	84236.1	87002.5	86629.8	82482.6	82922.6	90285.4	1	1.03284	1.02842	0.979185	0.984408	1.07181	0	0.45732	0.395706	-0.289853	-0.217119
Q8IWL3	HSCB	Iron-sulfur cluster co-chaperone protein HscB	60617.1	60148.5	60475.3	60693.2	52437.9	66242.9	58551.4	68468.6	61667.7	65189.5	52176.8	65080.4	53782.3	54254.2	62507.6	64257.1	56597.3	56176.3	57392.3	57629.8	62197	64077	61988.6	71467.9	69888.5	60303	67732.8	58520.4	79111.7	67951.4	58874.4	64024	57560.3	58410.6	65923.8	66723.9	1	1.08747	0.977679	0.992122	1.11974	1.13333	0	0.656046	-0.167414	-0.0590906	0.898075
Q9UL33	TRAPPC2L	Trafficking protein particle complex subunit 2-like protein	31995.7	28189.6	29572.9	28250.2	29093.3	26914.9	25228.2	28088.9	28113.7	26568	26093	27628.4	27781.9	29151.4	27416	26622.2	25939.5	28152.4	27971	28460.2	29035.8	28610.3	27746.3	25236.2	27015.2	27387.2	25084.2	24733.9	29859.8	26634	29420.3	26982.7	27614.1	27429.1	27528.8	26739.8	1	0.917145	0.938607	0.932316	0.935705	0.908888	1	0.0906266	0.326178	0.257139	0.294332
Q9H8W4	PLEKHF2	Pleckstrin homology domain-containing family F member 2	81101.2	68441	66509.2	70352	67588.8	64322.2	65425.8	64705.2	63071.1	66894.7	69855.4	66309.2	70382.2	71811.1	65527.8	68050	72420.5	73987.8	70061.6	70463.6	65400.5	70306.2	69802.9	72526	63813.4	68426.1	64276.2	65229.8	65510.7	56293	70798.4	64883.8	68777.2	70996.7	68369.8	63947.2	1	0.916458	0.97145	1.0028	0.965696	0.903228	1	0.136712	0.704976	1.02894	0.645521
Q9GZR1	SENP6	Sentrin-specific protease 6	9868.24	10722.2	13076.5	9541.84	9890.59	12085.8	12802.6	5573.34	13473	15467.5	12649.1	12954.2	7623.38	9147.82	9137.88	11818.2	9910.5	10767.3	10603.7	8468.77	12841.5	10212.8	8382.59	10048.5	9441.95	11887.2	11136.4	13966.3	13230.7	11578.5	10619.9	11880.4	10302.5	10313.7	10185.5	12359.8	1	1.1187	0.970113	0.971171	0.959097	1.16384	0	0.724489	-0.182419	-0.175963	-0.249653
P23771	GATA3	Trans-acting T-cell-specific transcription factor GATA-3	42112.6	36697.1	35995.3	38363.9	33458.8	32397	38937.1	33699.5	37277.7	40063.2	36572.6	40679.1	38002.5	40980.6	41066.1	37677	38729.9	32917.1	32770.6	42653.1	45252.2	37087.2	34462.7	49069.3	43021.1	40379.6	43151.9	41169.4	43905.5	37658.7	37325.5	36474.9	39460.2	36949.5	41778.5	41253	1	0.97721	1.05719	0.989926	1.1193	1.10522	0	-0.216589	0.543515	-0.0957433	1.13379
O00267	SUPT5H	Transcription elongation factor SPT5	69103	66505.6	72754	68776.9	59568.3	60382.5	62622.8	69282.6	60489.6	66870.7	62498.9	67931.8	66981.4	58552.1	67222.8	68605.2	69273	58372.4	65000.4	62581.4	68047.8	63499.5	68511.9	63499.9	57947.4	68935	77883.2	75737.6	82215.1	68084.6	67341.5	63929.6	64637.4	64766.5	64301.3	74571.1	1	0.949335	0.959844	0.961762	0.954854	1.10736	0	-0.471936	-0.37404	-0.356182	-0.420528
Q9UIU6	SIX4	Homeobox protein SIX4	3832.32	14395.3	11909.8	6495.07	3954.81	10715.2	8457.95	11481.8	7554.27	11989.3	12228	12581	11154	11770.4	10927.6	10928.5	12304.8	8885.02	1172.65	844.46	11441.1	8539.7	10596.7	1049.39	10562.9	11594.8	11149.2	10651.6	12585.6	12525.6	8117.46	10039.7	11732.2	6827.08	8437.98	11701.4	1	1.2368	1.44531	0.841037	1.03949	1.44151	0	0.536351	1.0086	-0.360045	0.0894327
Q6SPF0	SAMD1	Sterile alpha motif domain-containing protein 1	9730.98	7654.89	13429.5	9112.78	9213.53	12955.5	6196.18	10981.4	6564.32	13323	9607.16	8459.46	11654.9	13669.7	10200.5	10828.2	10533.2	10142.1	11852.5	14887.1	7905.38	13070.2	9685.53	12661.5	13559.2	12713.2	9045.11	12104.3	13608.9	15000	9828.33	10004.1	10718.3	11648.6	11376.4	12494.3	1	1.01788	1.09056	1.18521	1.15751	1.27125	0	0.0659252	0.333838	0.682792	0.580658
Q15532	SS18	Protein SSXT	26186.8	25195.1	25475.8	24461.3	25015.9	26308.9	26495.1	28080.2	24812.8	27036.3	25732.4	26210.7	24850	23858.1	31661.3	24956.4	24900	24490.5	24392.7	27331.7	26569.3	26334.9	24681.7	31548	27592.4	26885	26333.3	27102.3	30096.8	26481.5	25267	26546.7	26462.5	25214.3	27345.3	27379.8	1	1.05065	1.04732	0.997913	1.08225	1.08362	0	0.605671	0.565847	-0.024958	0.983666
Q9NQH7	XPNPEP3	Xaa-Pro aminopeptidase 3	2.88422e+06	2.97165e+06	3.00723e+06	2.79037e+06	2.78755e+06	3.3734e+06	2.95973e+06	3.14125e+06	3177752	2995343	2.93836e+06	3.11313e+06	3.0101e+06	2.55278e+06	2.96721e+06	3.05946e+06	3.10396e+06	3.12921e+06	2.69454e+06	2903876	3190289	3.32786e+06	2.80676e+06	3.18987e+06	3.00842e+06	2.99426e+06	3.08542e+06	2.88144e+06	3.58102e+06	3.19783e+06	2.8882e+06	3.12949e+06	2.91632e+06	2.97821e+06	3.10464e+06	3.14799e+06	1	1.08354	1.00973	1.03116	1.07494	1.08995	0	0.928786	0.108214	0.346451	0.833117
P10398	ARAF	Serine/threonine-protein kinase A-Raf	11771	14483.5	9752.9	14942.1	17886.8	15700.2	18613.7	17167.5	16298.3	19259.6	17585.9	17323.3	15593.3	19606.2	16620.6	16275.6	16056.6	19317.8	17811.1	19497.8	15439.8	18879.8	17128.1	14930.7	18771.9	17585.7	16026.3	15674.1	15535.5	19315.4	13767.3	17407.9	17345.9	17791.7	17030.1	16827.4	1	1.26444	1.25994	1.29232	1.237	1.22228	0	1.18969	1.16943	1.31514	1.06623
O43310	CTIF	CBP80/20-dependent translation initiation factor	13340.7	12845	13878.1	12383.8	13889.6	14741.3	15462.8	16104.2	13244.8	13623.3	18026.9	14984.5	13610.2	14708.7	17480.9	14729.3	19095.4	15615	14056.2	15743.7	18217.1	18098	17544.7	22599.3	15680.3	13779.2	15541.6	15323.3	13458.6	15733.8	13267.4	14635.3	15762.2	15847.9	18427.9	14767.3	1	1.1031	1.18804	1.1945	1.38896	1.11305	0	0.911993	1.66335	1.72048	3.4406
Q9BYK8	HELZ2	3'-5' exoribonuclease HELZ2	1262.05	2791.61	707.88	1669.31	2608.43	2185.94	2497.24	1825.89	2388.08	2781.85	2739.06	3284.31	2503.62	2130.74	2247.79	2824.46	2872.45	2577.18	2249.72	2244.85	821.73	559.394	2326.41	2146.56	1905.08	2653.77	2563.04	2840.3	2624.95	2507.93	1807.86	2335.8	2581.1	2553.73	1551.83	2638	1	1.29203	1.42771	1.41257	0.858383	1.45918	0	0.635969	0.931462	0.898493	-0.308411
O15231	ZNF185	Zinc finger protein 185	94459.6	92245.1	94689.3	86145.1	81117.4	93535.5	87257.1	108197	87645.8	97876.3	87547.2	90612.2	84058.7	87464.6	105258	91962.2	90731	80699	88668.7	95062.5	99131.9	93592.9	84737.1	105108	92163	92602.6	102144	95128	107917	92854	89731.3	94902.3	90988.2	89424.7	94946.5	98129.2	1	1.05763	1.01401	0.996583	1.05812	1.09359	0	0.615751	0.149663	-0.0365115	0.621013
Q15311	RALBP1	RalA-binding protein 1	3734.83	4107.18	3941.6	3751.42	3543.22	4770.91	5823.67	5579.87	6045.06	6374.6	5311.2	3746.47	4458.85	6002.18	4521.61	4760.65	5257.69	4777.28	3694.78	6081.87	5589.91	6424.68	5381.92	5132.73	4910.32	6006.6	3962.27	4273.82	4680.12	4315.14	3815.65	5718.82	4808.06	4914.46	5487.91	4647.59	1	1.49878	1.26009	1.28797	1.43826	1.21803	0	2.28763	1.19289	1.32078	2.01007
P05787	KRT8	Keratin, type II cytoskeletal 8	52264284	49026904	49971752	47112096	44733676	47050716	43825392	51053328	45808476	50568244	44055260	49059560	47810408	46622652	50929800	49643052	49868452	44519064	45243760	48288924	51552020	49978148	47852432	54818880	47682604	50144016	54227696	51012980	59078964	52432248	4.86217e+07	4.76612e+07	47695536	4.75127e+07	5.03768e+07	5.33792e+07	1	0.980245	0.980951	0.977189	1.0361	1.09785	0	-0.201897	-0.194686	-0.233128	0.368912
P78330	PSPH	Phosphoserine phosphatase	324548	298757	303510	302261	283946	285505	260762	275323	270435	282981	293443	305778	299371	270780	317755	316743	293913	269820	261701	294106	320538	296895	311044	343369	289222	309038	325947	323923	373840	312869	302604	275001	297425	287257	312214	329123	1	0.908782	0.982886	0.949281	1.03176	1.08764	0	-1.04088	-0.195286	-0.578743	0.362359
[truncated: 5,539 more rows]
[truncated: 6 more columns]
